# Supplementary material for: Unlocking Ultrasensitive Phosphoproteomics of Nanoscale Samples: A Rapid IMAC Enrichment Platform Using Ti-PAN Tip
Source: Research Square preprint supplement (doi:10.21203/rs.3.rs-8623740/v1), 2026-01-28
Supplement: Supplementary file 2 [file 2a736bb960ab6bad83ab6b15.xlsx]

## Sheet: 100000cells_1_MSFragger
Peptide Sequence	Modified Sequence	Prev AA	Next AA	Start	End	Peptide Length	Charges	Assigned Modifications	Protein	Protein ID	Entry Name	Gene	Protein Description	Mapped Genes	Mapped Proteins	cell5_3 Spectral Count	cell5_3 Intensity	cell5_3 Match Type	cell5_3 Localization
AAAAAPASEDEDDEDDEDDEDDDDDEEDDSEEEAMETTPAK	AAAAAPASEDEDDEDDEDDEDDDDDEEDDSEEEAM[15.9949]ET[79.9663]T[79.9663]PAK	K	G	177	217	41	4,5	35M(15.9949),37T(79.9663),38T(79.9663)	sp|P19338|NUCL_HUMAN	P19338	NUCL_HUMAN	NCL	Nucleolin			5	1.19526477E9	MS/MS	M:15.9949@AAAAAPASEDEDDEDDEDDEDDDDDEEDDSEEEAM(1.0000)ETTPAK;STY:79.9663@AAAAAPAS(0.0924)EDEDDEDDEDDEDDDDDEEDDS(0.0614)EEEAMET(0.9230)T(0.9231)PAK;
AAAAAPASEDEDDEDDEDDEDDDDDEEDDSEEEAMETTPAK	AAAAAPASEDEDDEDDEDDEDDDDDEEDDS[79.9663]EEEAMETTPAK	K	G	177	217	41	4	30S(79.9663)	sp|P19338|NUCL_HUMAN	P19338	NUCL_HUMAN	NCL	Nucleolin			1	0	MS/MS	STY:79.9663@AAAAAPAS(0.2637)EDEDDEDDEDDEDDDDDEEDDS(0.6752)EEEAMET(0.0273)T(0.0338)PAK;
AAAAAPASEDEDDEDDEDDEDDDDDEEDDSEEEAMETTPAK	AAAAAPASEDEDDEDDEDDEDDDDDEEDDS[79.9663]EEEAMET[79.9663]TPAK	K	G	177	217	41	4	30S(79.9663),37T(79.9663)	sp|P19338|NUCL_HUMAN	P19338	NUCL_HUMAN	NCL	Nucleolin			5	1.10308128E8	MS/MS	STY:79.9663@AAAAAPAS(0.5361)EDEDDEDDEDDEDDDDDEEDDS(0.6711)EEEAMET(0.6924)T(0.1004)PAK;
AAAAAPASEDEDDEDDEDDEDDDDDEEDDSEEEAMETTPAK	AAAAAPASEDEDDEDDEDDEDDDDDEEDDS[79.9663]EEEAMET[79.9663]T[79.9663]PAK	K	G	177	217	41	4	30S(79.9663),37T(79.9663),38T(79.9663)	sp|P19338|NUCL_HUMAN	P19338	NUCL_HUMAN	NCL	Nucleolin			3	3.192635E7	MS/MS	STY:79.9663@AAAAAPAS(0.6366)EDEDDEDDEDDEDDDDDEEDDS(0.7868)EEEAMET(0.7883)T(0.7883)PAK;
AAAAAPASEDEDDEDDEDDEDDDDDEEDDSEEEAMETTPAK	AAAAAPASEDEDDEDDEDDEDDDDDEEDDS[79.9663]EEEAM[15.9949]ETTPAK	K	G	177	217	41	4	30S(79.9663),35M(15.9949)	sp|P19338|NUCL_HUMAN	P19338	NUCL_HUMAN	NCL	Nucleolin			1	2.246994E7	MS/MS	M:15.9949@AAAAAPASEDEDDEDDEDDEDDDDDEEDDSEEEAM(1.0000)ETTPAK;STY:79.9663@AAAAAPAS(0.2126)EDEDDEDDEDDEDDDDDEEDDS(0.7287)EEEAMET(0.0294)T(0.0294)PAK;
AAAAAPASEDEDDEDDEDDEDDDDDEEDDSEEEAMETTPAK	AAAAAPASEDEDDEDDEDDEDDDDDEEDDS[79.9663]EEEAM[15.9949]ETT[79.9663]PAK	K	G	177	217	41	6	30S(79.9663),35M(15.9949),38T(79.9663)	sp|P19338|NUCL_HUMAN	P19338	NUCL_HUMAN	NCL	Nucleolin			1	3913798	MS/MS	M:15.9949@AAAAAPASEDEDDEDDEDDEDDDDDEEDDSEEEAM(1.0000)ETTPAK;STY:79.9663@AAAAAPAS(0.2939)EDEDDEDDEDDEDDDDDEEDDS(0.5492)EEEAMET(0.5492)T(0.6077)PAK;
AAAAAPASEDEDDEDDEDDEDDDDDEEDDSEEEAMETTPAK	AAAAAPASEDEDDEDDEDDEDDDDDEEDDS[79.9663]EEEAM[15.9949]ET[79.9663]TPAK	K	G	177	217	41	4,5	30S(79.9663),35M(15.9949),37T(79.9663)	sp|P19338|NUCL_HUMAN	P19338	NUCL_HUMAN	NCL	Nucleolin			3	6.6606848E7	MS/MS	M:15.9949@AAAAAPASEDEDDEDDEDDEDDDDDEEDDSEEEAM(1.0000)ETTPAK;STY:79.9663@AAAAAPAS(0.3540)EDEDDEDDEDDEDDDDDEEDDS(0.7698)EEEAMET(0.7669)T(0.1094)PAK;
AAAAAPASEDEDDEDDEDDEDDDDDEEDDSEEEAMETTPAK	AAAAAPAS[79.9663]EDEDDEDDEDDEDDDDDEEDDSEEEAMETTPAK	K	G	177	217	41	4	8S(79.9663)	sp|P19338|NUCL_HUMAN	P19338	NUCL_HUMAN	NCL	Nucleolin			4	1.02955344E8	MS/MS	STY:79.9663@AAAAAPAS(0.6301)EDEDDEDDEDDEDDDDDEEDDS(0.2625)EEEAMET(0.0537)T(0.0537)PAK;
AAAAAPASEDEDDEDDEDDEDDDDDEEDDSEEEAMETTPAK	AAAAAPAS[79.9663]EDEDDEDDEDDEDDDDDEEDDSEEEAMET[79.9663]TPAK	K	G	177	217	41	4	37T(79.9663),8S(79.9663)	sp|P19338|NUCL_HUMAN	P19338	NUCL_HUMAN	NCL	Nucleolin			2	4.09501261E9	MS/MS	STY:79.9663@AAAAAPAS(0.6210)EDEDDEDDEDDEDDDDDEEDDS(0.1441)EEEAMET(0.6175)T(0.6175)PAK;
AAAAAPASEDEDDEDDEDDEDDDDDEEDDSEEEAMETTPAK	AAAAAPAS[79.9663]EDEDDEDDEDDEDDDDDEEDDSEEEAM[15.9949]ETTPAK	K	G	177	217	41	4	35M(15.9949),8S(79.9663)	sp|P19338|NUCL_HUMAN	P19338	NUCL_HUMAN	NCL	Nucleolin			2	0	MS/MS	M:15.9949@AAAAAPASEDEDDEDDEDDEDDDDDEEDDSEEEAM(1.0000)ETTPAK;STY:79.9663@AAAAAPAS(0.8269)EDEDDEDDEDDEDDDDDEEDDS(0.0558)EEEAMET(0.0586)T(0.0586)PAK;
AAAAAPASEDEDDEDDEDDEDDDDDEEDDSEEEAMETTPAK	AAAAAPAS[79.9663]EDEDDEDDEDDEDDDDDEEDDSEEEAM[15.9949]ET[79.9663]TPAK	K	G	177	217	41	4	35M(15.9949),37T(79.9663),8S(79.9663)	sp|P19338|NUCL_HUMAN	P19338	NUCL_HUMAN	NCL	Nucleolin			2	0	MS/MS	M:15.9949@AAAAAPASEDEDDEDDEDDEDDDDDEEDDSEEEAM(1.0000)ETTPAK;STY:79.9663@AAAAAPAS(0.6435)EDEDDEDDEDDEDDDDDEEDDS(0.1728)EEEAMET(0.5918)T(0.5918)PAK;
AAAAAPASEDEDDEDDEDDEDDDDDEEDDSEEEAMETTPAK	AAAAAPAS[79.9663]EDEDDEDDEDDEDDDDDEEDDS[79.9663]EEEAMETTPAK	K	G	177	217	41	4,5	30S(79.9663),8S(79.9663)	sp|P19338|NUCL_HUMAN	P19338	NUCL_HUMAN	NCL	Nucleolin			11	4.23144371E9	MS/MS	STY:79.9663@AAAAAPAS(0.9256)EDEDDEDDEDDEDDDDDEEDDS(0.9298)EEEAMET(0.0829)T(0.0617)PAK;
AAAAAPASEDEDDEDDEDDEDDDDDEEDDSEEEAMETTPAKGK	AAAAAPAS[79.9663]EDEDDEDDEDDEDDDDDEEDDS[79.9663]EEEAMETTPAKGK	K	K	177	219	43	4	30S(79.9663),8S(79.9663)	sp|P19338|NUCL_HUMAN	P19338	NUCL_HUMAN	NCL	Nucleolin			1	0	MS/MS	STY:79.9663@AAAAAPAS(0.5437)EDEDDEDDEDDEDDDDDEEDDS(0.5437)EEEAMET(0.4563)T(0.4563)PAKGK;
AAAAAPASEDEDDEDDEDDEDDDDDEEDDSEEEAMETTPAK	AAAAAPAS[79.9663]EDEDDEDDEDDEDDDDDEEDDS[79.9663]EEEAMET[79.9663]TPAK	K	G	177	217	41	4	30S(79.9663),37T(79.9663),8S(79.9663)	sp|P19338|NUCL_HUMAN	P19338	NUCL_HUMAN	NCL	Nucleolin			2	1.60557856E8	MS/MS	STY:79.9663@AAAAAPAS(0.9341)EDEDDEDDEDDEDDDDDEEDDS(0.9375)EEEAMET(0.9373)T(0.1912)PAK;
AAAAAPASEDEDDEDDEDDEDDDDDEEDDSEEEAMETTPAK	AAAAAPAS[79.9663]EDEDDEDDEDDEDDDDDEEDDS[79.9663]EEEAM[15.9949]ETTPAK	K	G	177	217	41	4,5	30S(79.9663),35M(15.9949),8S(79.9663)	sp|P19338|NUCL_HUMAN	P19338	NUCL_HUMAN	NCL	Nucleolin			17	1.24224294E9	MS/MS	M:15.9949@AAAAAPASEDEDDEDDEDDEDDDDDEEDDSEEEAM(1.0000)ETTPAK;STY:79.9663@AAAAAPAS(0.9394)EDEDDEDDEDDEDDDDDEEDDS(0.9501)EEEAMET(0.0552)T(0.0552)PAK;
AAAGPLDMSLPSTPDIK	AAAGPLDMS[79.9663]LPS[79.9663]TPDIK	K	I	89	105	17	2	12S(79.9663),9S(79.9663)	sp|P17544-2|ATF7_HUMAN	P17544-2	ATF7_HUMAN	ATF7	Isoform 2 of Cyclic AMP-dependent transcription factor ATF-7		sp|P17544-4|ATF7_HUMAN, sp|P17544|ATF7_HUMAN	2	9.5825112E7	MS/MS	STY:79.9663@AAAGPLDMS(0.9446)LPS(0.9447)T(0.1106)PDIK;
AAATPESQEPQAK	AAATPES[79.9663]QEPQAK	K	G	145	157	13	2	7S(79.9663)	sp|P49006|MRP_HUMAN	P49006	MRP_HUMAN	MARCKSL1	MARCKS-related protein			2	1.8216624E7	MS/MS	STY:79.9663@AAAT(0.0572)PES(0.9428)QEPQAK;
AAATPESQEPQAK	AAAT[79.9663]PESQEPQAK	K	G	145	157	13	2	4T(79.9663)	sp|P49006|MRP_HUMAN	P49006	MRP_HUMAN	MARCKSL1	MARCKS-related protein			1	1.1386542E7	MS/MS	STY:79.9663@AAAT(0.9322)PES(0.0678)QEPQAK;
AAAYDISEDEED	AAAY[79.9663]DISEDEED	K	-	356	367	12	2	4Y(79.9663)	sp|P49585|PCY1A_HUMAN	P49585	PCY1A_HUMAN	PCYT1A	Choline-phosphate cytidylyltransferase A			3	8.2567896E7	MS/MS	STY:79.9663@AAAY(0.8933)DIS(0.1067)EDEED;
AADPPAENSSAPEAEQGGAE	AADPPAENSS[79.9663]APEAEQGGAE	K	-	305	324	20	2	10S(79.9663)	sp|P67809|YBOX1_HUMAN	P67809	YBOX1_HUMAN	YBX1	Y-box-binding protein 1			5	5.4290221E8	MS/MS	STY:79.9663@AADPPAENS(0.0535)S(0.9465)APEAEQGGAE;
AADPPAENSSAPEAEQGGAE	AADPPAENS[79.9663]SAPEAEQGGAE	K	-	305	324	20	2,3	9S(79.9663)	sp|P67809|YBOX1_HUMAN	P67809	YBOX1_HUMAN	YBX1	Y-box-binding protein 1			14	5.8128122E8	MS/MS	STY:79.9663@AADPPAENS(0.9455)S(0.0545)APEAEQGGAE;
AADSDDGAVSAPAASDGGVSK	AADSDDGAVSAPAAS[79.9663]DGGVSK	M	S	2	22	21	3	15S(79.9663)	sp|Q96GM8|TOE1_HUMAN	Q96GM8	TOE1_HUMAN	TOE1	Target of EGR1 protein 1			1	0	MS/MS	STY:79.9663@AADS(0.2148)DDGAVS(0.2148)APAAS(0.2852)DGGVS(0.2852)K;
AADSQNSGEGNTGAAESSFSQEVSR	AADSQNS[79.9663]GEGNTGAAESSFSQEVSR	R	E	2031	2055	25	3	7S(79.9663)	sp|P12270|TPR_HUMAN	P12270	TPR_HUMAN	TPR	Nucleoprotein TPR			1	0	MS/MS	STY:79.9663@AADS(0.0079)QNS(0.2875)GEGNT(0.0048)GAAES(0.1510)S(0.1893)FS(0.2177)QEVS(0.1418)R;
AADSSDSDGAEESPAEPGAPR	AADSSDS[79.9663]DGAEES[79.9663]PAEPGAPR	R	E	13	33	21	2	13S(79.9663),7S(79.9663)	sp|P16383|GCFC2_HUMAN	P16383	GCFC2_HUMAN	GCFC2	Intron Large complex component GCFC2		sp|P16383-2|GCFC2_HUMAN, sp|P16383-3|GCFC2_HUMAN, sp|P16383-4|GCFC2_HUMAN	1	0	MS/MS	STY:79.9663@AADS(0.1198)S(0.1198)DS(0.8796)DGAEES(0.8807)PAEPGAPR;
AADSSDSDGAEESPAEPGAPR	AADSS[79.9663]DS[79.9663]DGAEES[79.9663]PAEPGAPR	R	E	13	33	21	2	13S(79.9663),5S(79.9663),7S(79.9663)	sp|P16383|GCFC2_HUMAN	P16383	GCFC2_HUMAN	GCFC2	Intron Large complex component GCFC2		sp|P16383-2|GCFC2_HUMAN, sp|P16383-3|GCFC2_HUMAN, sp|P16383-4|GCFC2_HUMAN	1	7.6107176E7	MS/MS	STY:79.9663@AADS(0.6966)S(0.7713)DS(0.7616)DGAEES(0.7705)PAEPGAPR;
AADSDDGAVSAPAASDGGVSK	AADS[79.9663]DDGAVSAPAASDGGVSK	M	S	2	22	21	2	4S(79.9663)	sp|Q96GM8|TOE1_HUMAN	Q96GM8	TOE1_HUMAN	TOE1	Target of EGR1 protein 1			5	1.81697296E8	MS/MS	STY:79.9663@AADS(0.9445)DDGAVS(0.0185)APAAS(0.0185)DGGVS(0.0185)K;
AADSQNSGEGNTGAAESSFSQEVSR	AADS[79.9663]QNSGEGNTGAAESSFSQEVSR	R	E	2031	2055	25	3	4S(79.9663)	sp|P12270|TPR_HUMAN	P12270	TPR_HUMAN	TPR	Nucleoprotein TPR			1	0	MS/MS	STY:79.9663@AADS(0.8107)QNS(0.0094)GEGNT(0.1191)GAAES(0.0177)S(0.0144)FS(0.0144)QEVS(0.0144)R;
AADSSDSDGAEESPAEPGAPR	AADS[79.9663]SDSDGAEESPAEPGAPR	R	E	13	33	21	2	4S(79.9663)	sp|P16383|GCFC2_HUMAN	P16383	GCFC2_HUMAN	GCFC2	Intron Large complex component GCFC2		sp|P16383-2|GCFC2_HUMAN, sp|P16383-3|GCFC2_HUMAN, sp|P16383-4|GCFC2_HUMAN	1	5.36455e+06	MS/MS	STY:79.9663@AADS(0.3292)S(0.3292)DS(0.3292)DGAEES(0.0123)PAEPGAPR;
AADSSDSDGAEESPAEPGAPR	AADS[79.9663]SDS[79.9663]DGAEES[79.9663]PAEPGAPR	R	E	13	33	21	2	13S(79.9663),4S(79.9663),7S(79.9663)	sp|P16383|GCFC2_HUMAN	P16383	GCFC2_HUMAN	GCFC2	Intron Large complex component GCFC2		sp|P16383-2|GCFC2_HUMAN, sp|P16383-3|GCFC2_HUMAN, sp|P16383-4|GCFC2_HUMAN	1	7.6107176E7	MS/MS	STY:79.9663@AADS(0.9258)S(0.2229)DS(0.9257)DGAEES(0.9257)PAEPGAPR;
AADSSDSDGAEESPAEPGAPR	AADS[79.9663]S[79.9663]DSDGAEES[79.9663]PAEPGAPR	R	E	13	33	21	2,3	13S(79.9663),4S(79.9663),5S(79.9663)	sp|P16383|GCFC2_HUMAN	P16383	GCFC2_HUMAN	GCFC2	Intron Large complex component GCFC2		sp|P16383-2|GCFC2_HUMAN, sp|P16383-3|GCFC2_HUMAN, sp|P16383-4|GCFC2_HUMAN	2	0	MS/MS	STY:79.9663@AADS(0.7434)S(0.7434)DS(0.7434)DGAEES(0.7699)PAEPGAPR;
AADSSDSDGAEESPAEPGAPR	AADS[79.9663]S[79.9663]DS[79.9663]DGAEESPAEPGAPR	R	E	13	33	21	2,3	4S(79.9663),5S(79.9663),7S(79.9663)	sp|P16383|GCFC2_HUMAN	P16383	GCFC2_HUMAN	GCFC2	Intron Large complex component GCFC2		sp|P16383-2|GCFC2_HUMAN, sp|P16383-3|GCFC2_HUMAN, sp|P16383-4|GCFC2_HUMAN	6	8.3805136E7	MS/MS	STY:79.9663@AADS(0.9501)S(0.9501)DS(0.9501)DGAEES(0.1496)PAEPGAPR;
AADTEEMDIEMDSGDEA	AADTEEMDIEMDS[79.9663]GDEA	R	-	395	411	17	2	13S(79.9663)	sp|Q9UBB5|MBD2_HUMAN	Q9UBB5	MBD2_HUMAN	MBD2	Methyl-CpG-binding domain protein 2			5	9.796676E7	MS/MS	STY:79.9663@AADT(0.0529)EEMDIEMDS(0.9471)GDEA;
AADTEEMDIEMDSGDEA	AADTEEMDIEM[15.9949]DS[79.9663]GDEA	R	-	395	411	17	2	11M(15.9949),13S(79.9663)	sp|Q9UBB5|MBD2_HUMAN	Q9UBB5	MBD2_HUMAN	MBD2	Methyl-CpG-binding domain protein 2			2	2.6109848E7	MS/MS	M:15.9949@AADTEEM(0.0574)DIEM(0.9426)DSGDEA;STY:79.9663@AADT(0.0799)EEMDIEMDS(0.9201)GDEA;
AADTEEMDIEMDSGDEA	AADTEEM[15.9949]DIEMDS[79.9663]GDEA	R	-	395	411	17	2	13S(79.9663),7M(15.9949)	sp|Q9UBB5|MBD2_HUMAN	Q9UBB5	MBD2_HUMAN	MBD2	Methyl-CpG-binding domain protein 2			1	1.9794308E7	MS/MS	M:15.9949@AADTEEM(0.6905)DIEM(0.3095)DSGDEA;STY:79.9663@AADT(0.0895)EEMDIEMDS(0.9105)GDEA;
AADTEEMDIEMDSGDEA	AADTEEM[15.9949]DIEM[15.9949]DS[79.9663]GDEA	R	-	395	411	17	2	11M(15.9949),13S(79.9663),7M(15.9949)	sp|Q9UBB5|MBD2_HUMAN	Q9UBB5	MBD2_HUMAN	MBD2	Methyl-CpG-binding domain protein 2			1	0	MS/MS	M:15.9949@AADTEEM(1.0000)DIEM(1.0000)DSGDEA;STY:79.9663@AADT(0.0580)EEMDIEMDS(0.9420)GDEA;
AAEAAAAPAESAAPAAGEEPSK	AAEAAAAPAES[79.9663]AAPAAGEEPSK	K	E	122	143	22	2	11S(79.9663)	sp|P80723|BASP1_HUMAN	P80723	BASP1_HUMAN	BASP1	Brain acid soluble protein 1			1	0	MS/MS	STY:79.9663@AAEAAAAPAES(0.9341)AAPAAGEEPS(0.0659)K;
AAEDDSASPPGAASDAEPGDEERPGLQVDCVVCGDK	AAEDDSAS[79.9663]PPGAAS[79.9663]DAEPGDEERPGLQVDC[57.0215]VVC[57.0215]GDK	R	S	27	62	36	3	14S(79.9663),30C(57.0215),33C(57.0215),8S(79.9663)	sp|P10588|NR2F6_HUMAN	P10588	NR2F6_HUMAN	NR2F6	Nuclear receptor subfamily 2 group F member 6			1	4.3998712E7	MS/MS	STY:79.9663@AAEDDS(0.2132)AS(0.8934)PPGAAS(0.8934)DAEPGDEERPGLQVDCVVCGDK;
AAEDDSASPPGAASDAEPGDEERPGLQVDCVVCGDK	AAEDDS[79.9663]AS[79.9663]PPGAASDAEPGDEERPGLQVDC[57.0215]VVC[57.0215]GDK	R	S	27	62	36	4	30C(57.0215),33C(57.0215),6S(79.9663),8S(79.9663)	sp|P10588|NR2F6_HUMAN	P10588	NR2F6_HUMAN	NR2F6	Nuclear receptor subfamily 2 group F member 6			1	4816545	MS/MS	STY:79.9663@AAEDDS(0.6667)AS(0.6667)PPGAAS(0.6667)DAEPGDEERPGLQVDCVVCGDK;
AAEEAFVNDIDESSPGTEWER	AAEEAFVNDIDES[79.9663]SPGTEWER	R	V	163	183	21	3	13S(79.9663)	sp|P09496-2|CLCA_HUMAN	P09496-2	CLCA_HUMAN	CLTA	Isoform Non-brain of Clathrin light chain A		sp|P09496-5|CLCA_HUMAN	1	1.1151559E7	MS/MS	STY:79.9663@AAEEAFVNDIDES(0.8408)S(0.1216)PGT(0.0375)EWER;
AAEEQGDDQDSEK	AAEEQGDDQDS[79.9663]EK	K	S	175	187	13	2	11S(79.9663)	sp|Q1KMD3|HNRL2_HUMAN	Q1KMD3	HNRL2_HUMAN	HNRNPUL2	Heterogeneous nuclear ribonucleoprotein U-like protein 2			5	1.68242528E8	MS/MS	STY:79.9663@AAEEQGDDQDS(1.0000)EK;
AAEMVPDLPSPPMEAPAPASNPSGR	AAEMVPDLPS[79.9663]PPMEAPAPASNPSGR	K	K	420	444	25	3	10S(79.9663)	sp|Q6ZVM7-2|TM1L2_HUMAN	Q6ZVM7-2	TM1L2_HUMAN	TOM1L2	Isoform 2 of TOM1-like protein 2		sp|Q6ZVM7-3|TM1L2_HUMAN, sp|Q6ZVM7-4|TM1L2_HUMAN, sp|Q6ZVM7-5|TM1L2_HUMAN, sp|Q6ZVM7|TM1L2_HUMAN	2	0	MS/MS	STY:79.9663@AAEMVPDLPS(0.6864)PPMEAPAPAS(0.1568)NPS(0.1568)GR;
AAESETPGKSPEK	AAESETPGKS[79.9663]PEK	K	K	418	430	13	2,3	10S(79.9663)	sp|O76021|RL1D1_HUMAN	O76021	RL1D1_HUMAN	RSL1D1	Ribosomal L1 domain-containing protein 1		sp|O76021-2|RL1D1_HUMAN	4	7.6755336E7	MS/MS	STY:79.9663@AAES(0.0420)ET(0.0271)PGKS(0.9309)PEK;
AAESETPGKSPEK	AAESET[79.9663]PGKSPEK	K	K	418	430	13	2	6T(79.9663)	sp|O76021|RL1D1_HUMAN	O76021	RL1D1_HUMAN	RSL1D1	Ribosomal L1 domain-containing protein 1		sp|O76021-2|RL1D1_HUMAN	1	5.67706E7	MS/MS	STY:79.9663@AAES(0.0269)ET(0.6326)PGKS(0.3404)PEK;
AAESLTAIPEPASPQLLETPIHASQIQK	AAESLT[79.9663]AIPEPASPQLLETPIHASQIQK	R	V	1476	1503	28	3	6T(79.9663)	sp|Q14676-3|MDC1_HUMAN	Q14676-3	MDC1_HUMAN	MDC1	Isoform 3 of Mediator of DNA damage checkpoint protein 1		sp|Q14676-2|MDC1_HUMAN, sp|Q14676|MDC1_HUMAN	1	1.6649908E7	MS/MS	STY:79.9663@AAES(0.2175)LT(0.6471)AIPEPAS(0.0265)PQLLET(0.0244)PIHAS(0.0845)QIQK;
AAESETPGKSPEK	AAES[79.9663]ETPGKSPEK	K	K	418	430	13	2	4S(79.9663)	sp|O76021|RL1D1_HUMAN	O76021	RL1D1_HUMAN	RSL1D1	Ribosomal L1 domain-containing protein 1		sp|O76021-2|RL1D1_HUMAN	1	5.67706E7	MS/MS	STY:79.9663@AAES(0.3333)ET(0.3333)PGKS(0.3333)PEK;
AAESETPGKSPEK	AAES[79.9663]ETPGKS[79.9663]PEK	K	K	418	430	13	2	10S(79.9663),4S(79.9663)	sp|O76021|RL1D1_HUMAN	O76021	RL1D1_HUMAN	RSL1D1	Ribosomal L1 domain-containing protein 1		sp|O76021-2|RL1D1_HUMAN	3	1.04860096E8	MS/MS	STY:79.9663@AAES(0.9125)ET(0.1744)PGKS(0.9131)PEK;
AAESETPGKSPEK	AAES[79.9663]ET[79.9663]PGKSPEK	K	K	418	430	13	2	4S(79.9663),6T(79.9663)	sp|O76021|RL1D1_HUMAN	O76021	RL1D1_HUMAN	RSL1D1	Ribosomal L1 domain-containing protein 1		sp|O76021-2|RL1D1_HUMAN	1	4.171446E7	MS/MS	STY:79.9663@AAES(0.9484)ET(0.9484)PGKS(0.1031)PEK;
AAFTTPDHAPLSPQSSVASSGSEQTEEQGSSR	AAFT[79.9663]TPDHAPLSPQSSVASSGSEQTEEQGSSR	R	N	260	291	32	3	4T(79.9663)	sp|Q5PRF9|SMAG2_HUMAN	Q5PRF9	SMAG2_HUMAN	SAMD4B	Protein Smaug homolog 2			2	2.146406E7	MS/MS	STY:79.9663@AAFT(0.3206)T(0.3206)PDHAPLS(0.0113)PQS(0.0113)S(0.0113)VAS(0.0084)S(0.0633)GS(0.0633)EQT(0.0633)EEQGS(0.0633)S(0.0633)R;
AAGAGGSGSESDHTAPSGVGSSWR	AAGAGGSGSESDHTAPSGVGS[79.9663]S[79.9663]WR	R	E	569	592	24	3	21S(79.9663),22S(79.9663)	sp|O14640-2|DVL1_HUMAN	O14640-2	DVL1_HUMAN	DVL1	Isoform 2 of Segment polarity protein dishevelled homolog DVL-1		sp|O14640|DVL1_HUMAN	1	0	MS/MS	STY:79.9663@AAGAGGS(0.0867)GS(0.0867)ES(0.0867)DHT(0.0217)APS(0.0217)GVGS(0.8482)S(0.8482)WR;
AAGDSGEDSDDSDYENLIDPTEPSNSEYSHSK	AAGDSGEDS[79.9663]DDSDYENLIDPTEPS[79.9663]NSEYSHS[79.9663]K	R	D	364	395	32	3	24S(79.9663),31S(79.9663),9S(79.9663)	sp|Q15018|ABRX2_HUMAN	Q15018	ABRX2_HUMAN	ABRAXAS2	BRISC complex subunit Abraxas 2			1	2.170268E7	MS/MS	STY:79.9663@AAGDS(0.0149)GEDS(0.4165)DDS(0.1544)DY(0.2867)ENLIDPT(0.2867)EPS(0.3541)NS(0.3541)EY(0.3541)S(0.3541)HS(0.4244)K;
AAGDTTVIENSDVSPETESSEK	AAGDTTVIENSDVSPET[79.9663]ESSEK	K	E	1243	1264	22	2	17T(79.9663)	sp|Q86UP2-2|KTN1_HUMAN	Q86UP2-2	KTN1_HUMAN	KTN1	Isoform 2 of Kinectin		sp|Q86UP2-3|KTN1_HUMAN, sp|Q86UP2-4|KTN1_HUMAN, sp|Q86UP2|KTN1_HUMAN	1	1.7873656E7	MS/MS	STY:79.9663@AAGDT(0.0245)T(0.0245)VIENS(0.1361)DVS(0.0211)PET(0.7645)ES(0.0167)S(0.0125)EK;
AAGDTTVIENSDVSPETESSEK	AAGDTTVIENSDVS[79.9663]PETESSEK	K	E	1243	1264	22	2	14S(79.9663)	sp|Q86UP2-2|KTN1_HUMAN	Q86UP2-2	KTN1_HUMAN	KTN1	Isoform 2 of Kinectin		sp|Q86UP2-3|KTN1_HUMAN, sp|Q86UP2-4|KTN1_HUMAN, sp|Q86UP2|KTN1_HUMAN	1	1.7873656E7	MS/MS	STY:79.9663@AAGDT(0.0916)T(0.0916)VIENS(0.2090)DVS(0.5856)PET(0.0074)ES(0.0074)S(0.0074)EK;
AAGGAPSPPPPVR	AAGGAPS[79.9663]PPPPVR	R	R	672	684	13	2	7S(79.9663)	sp|Q4KMP7|TB10B_HUMAN	Q4KMP7	TB10B_HUMAN	TBC1D10B	TBC1 domain family member 10B		sp|Q4KMP7-2|TB10B_HUMAN	4	4.9165656E7	MS/MS	STY:79.9663@AAGGAPS(1.0000)PPPPVR;
AAGGGAGSSEDDAQSR	AAGGGAGSS[79.9663]EDDAQSR	R	R	28	43	16	2	9S(79.9663)	sp|Q9H4A6|GOLP3_HUMAN	Q9H4A6	GOLP3_HUMAN	GOLPH3	Golgi phosphoprotein 3			1	0	MS/MS	STY:79.9663@AAGGGAGS(0.4796)S(0.5027)EDDAQS(0.0177)R;
AAGGGAGSSEDDAQSR	AAGGGAGS[79.9663]SEDDAQSR	R	R	28	43	16	2	8S(79.9663)	sp|Q9H4A6|GOLP3_HUMAN	Q9H4A6	GOLP3_HUMAN	GOLPH3	Golgi phosphoprotein 3			1	3.3322394E7	MS/MS	STY:79.9663@AAGGGAGS(0.4913)S(0.4913)EDDAQS(0.0173)R;
AAGGGAGSSEDDAQSR	AAGGGAGS[79.9663]S[79.9663]EDDAQSR	R	R	28	43	16	2	8S(79.9663),9S(79.9663)	sp|Q9H4A6|GOLP3_HUMAN	Q9H4A6	GOLP3_HUMAN	GOLPH3	Golgi phosphoprotein 3			1	0	MS/MS	STY:79.9663@AAGGGAGS(0.6737)S(0.6876)EDDAQS(0.6386)R;
AAGPASPPEEDPER	AAGPAS[79.9663]PPEEDPER	K	T	404	417	14	2	6S(79.9663)	sp|Q96KM6|Z512B_HUMAN	Q96KM6	Z512B_HUMAN	ZNF512B	Zinc finger protein 512B			3	2.015244E7	MS/MS	STY:79.9663@AAGPAS(1.0000)PPEEDPER;
AAGSPSSSDQDEK	AAGS[79.9663]PSSSDQDEK	K	L	184	196	13	2	4S(79.9663)	sp|Q9Y520-4|PRC2C_HUMAN	Q9Y520-4	PRC2C_HUMAN	PRRC2C	Isoform 4 of Protein PRRC2C		sp|Q9Y520-3|PRC2C_HUMAN, sp|Q9Y520-5|PRC2C_HUMAN, sp|Q9Y520-6|PRC2C_HUMAN, sp|Q9Y520-7|PRC2C_HUMAN, sp|Q9Y520|PRC2C_HUMAN	1	7058044	MS/MS	STY:79.9663@AAGS(0.9083)PS(0.0306)S(0.0306)S(0.0306)DQDEK;
AAHVPENSDTEQDVLTVK	AAHVPENSDTEQDVLT[79.9663]VK	R	P	591	608	18	2	16T(79.9663)	sp|Q9H2Y7-2|ZN106_HUMAN	Q9H2Y7-2	ZN106_HUMAN	ZNF106	Isoform 2 of Zinc finger protein 106		sp|Q9H2Y7|ZN106_HUMAN	1	0	MS/MS	STY:79.9663@AAHVPENS(0.4047)DT(0.1088)EQDVLT(0.4865)VK;
AAHVPENSDTEQDVLTVK	AAHVPENS[79.9663]DTEQDVLTVK	R	P	591	608	18	2	8S(79.9663)	sp|Q9H2Y7-2|ZN106_HUMAN	Q9H2Y7-2	ZN106_HUMAN	ZNF106	Isoform 2 of Zinc finger protein 106		sp|Q9H2Y7|ZN106_HUMAN	1	2.2804228E7	MS/MS	STY:79.9663@AAHVPENS(0.3671)DT(0.3671)EQDVLT(0.2659)VK;
AAKNSEEEEEEK	AAKNS[79.9663]EEEEEEK	K	K	569	580	12	2	5S(79.9663)	sp|Q14978-2|NOLC1_HUMAN	Q14978-2	NOLC1_HUMAN	NOLC1	Isoform Beta of Nucleolar and coiled-body phosphoprotein 1		sp|Q14978-3|NOLC1_HUMAN, sp|Q14978|NOLC1_HUMAN	3	6.5241352E7	MS/MS	STY:79.9663@AAKNS(1.0000)EEEEEEK;
AALIPGGLSDGQFYSPPESEAGSEEAEEK	AALIPGGLSDGQFYSPPES[79.9663]EAGS[79.9663]EEAEEK	R	Q	189	217	29	3	19S(79.9663),23S(79.9663)	sp|O95772-2|STR3N_HUMAN	O95772-2	STR3N_HUMAN	STARD3NL	Isoform 2 of STARD3 N-terminal-like protein		sp|O95772|STR3N_HUMAN	1	5.3206924E7	MS/MS	STY:79.9663@AALIPGGLS(0.3345)DGQFY(0.0322)S(0.0322)PPES(0.7973)EAGS(0.8038)EEAEEK;
AALIPGGLSDGQFYSPPESEAGSEEAEEK	AALIPGGLS[79.9663]DGQFYSPPES[79.9663]EAGS[79.9663]EEAEEK	R	Q	189	217	29	3	19S(79.9663),23S(79.9663),9S(79.9663)	sp|O95772-2|STR3N_HUMAN	O95772-2	STR3N_HUMAN	STARD3NL	Isoform 2 of STARD3 N-terminal-like protein		sp|O95772|STR3N_HUMAN	1	1.03608128E8	MS/MS	STY:79.9663@AALIPGGLS(0.9289)DGQFY(0.1121)S(0.1121)PPES(0.9227)EAGS(0.9243)EEAEEK;
AALIPGGLSDGQFYSPPESEAGSEEAEEK	AALIPGGLS[79.9663]DGQFY[79.9663]SPPESEAGS[79.9663]EEAEEK	R	Q	189	217	29	3	14Y(79.9663),23S(79.9663),9S(79.9663)	sp|O95772-2|STR3N_HUMAN	O95772-2	STR3N_HUMAN	STARD3NL	Isoform 2 of STARD3 N-terminal-like protein		sp|O95772|STR3N_HUMAN	1	1.03608128E8	MS/MS	STY:79.9663@AALIPGGLS(0.5965)DGQFY(0.5965)S(0.5965)PPES(0.5965)EAGS(0.6141)EEAEEK;
AALLAQYADVTDEEDEADEK	AALLAQYADVT[79.9663]DEEDEADEK	K	D	129	148	20	2	11T(79.9663)	sp|Q96MW1|CCD43_HUMAN	Q96MW1	CCD43_HUMAN	CCDC43	Coiled-coil domain-containing protein 43			3	1.59111792E8	MS/MS	STY:79.9663@AALLAQY(0.1815)ADVT(0.8185)DEEDEADEK;
AALLAQYADVTDEEDEADEK	AALLAQY[79.9663]ADVTDEEDEADEK	K	D	129	148	20	2,3	7Y(79.9663)	sp|Q96MW1|CCD43_HUMAN	Q96MW1	CCD43_HUMAN	CCDC43	Coiled-coil domain-containing protein 43			4	1.59111792E8	MS/MS	STY:79.9663@AALLAQY(0.9140)ADVT(0.0860)DEEDEADEK;
AAPEASSPPASPLQHLLPGK	AAPEASS[79.9663]PPAS[79.9663]PLQHLLPGK	K	A	673	692	20	2,3	11S(79.9663),7S(79.9663)	sp|Q96TA1-2|NIBA2_HUMAN	Q96TA1-2	NIBA2_HUMAN	NIBAN2	Isoform 2 of Protein Niban 2		sp|Q96TA1|NIBA2_HUMAN	4	2.27746611E9	MS/MS	STY:79.9663@AAPEAS(0.1064)S(0.9470)PPAS(0.9466)PLQHLLPGK;
AAPEASSPPASPLQHLLPGK	AAPEAS[79.9663]SPPASPLQHLLPGK	K	A	673	692	20	3	6S(79.9663)	sp|Q96TA1-2|NIBA2_HUMAN	Q96TA1-2	NIBA2_HUMAN	NIBAN2	Isoform 2 of Protein Niban 2		sp|Q96TA1|NIBA2_HUMAN	8	3.649986E7	MS/MS	STY:79.9663@AAPEAS(0.4912)S(0.4912)PPAS(0.0177)PLQHLLPGK;
AAPEASSPPASPLQHLLPGK	AAPEAS[79.9663]SPPAS[79.9663]PLQHLLPGK	K	A	673	692	20	2,3	11S(79.9663),6S(79.9663)	sp|Q96TA1-2|NIBA2_HUMAN	Q96TA1-2	NIBA2_HUMAN	NIBAN2	Isoform 2 of Protein Niban 2		sp|Q96TA1|NIBA2_HUMAN	11	2.2236928E9	MS/MS	STY:79.9663@AAPEAS(0.6549)S(0.6549)PPAS(0.6903)PLQHLLPGK;
AAPEASSPPASPLQHLLPGK	AAPEAS[79.9663]S[79.9663]PPASPLQHLLPGK	K	A	673	692	20	2,3	6S(79.9663),7S(79.9663)	sp|Q96TA1-2|NIBA2_HUMAN	Q96TA1-2	NIBA2_HUMAN	NIBAN2	Isoform 2 of Protein Niban 2		sp|Q96TA1|NIBA2_HUMAN	5	2.2780864E9	MS/MS	STY:79.9663@AAPEAS(0.9450)S(0.9450)PPAS(0.1100)PLQHLLPGK;
AAPPPPALTPDSQTVDSSCK	AAPPPPALTPDS[79.9663]QT[79.9663]VDSSC[57.0215]K	K	T	981	1000	20	3	12S(79.9663),14T(79.9663),19C(57.0215)	sp|Q9H7N4|SFR19_HUMAN	Q9H7N4	SFR19_HUMAN	SCAF1	Splicing factor, arginine/serine-rich 19			1	1.315237E7	MS/MS	STY:79.9663@AAPPPPALT(0.0282)PDS(0.5476)QT(0.4747)VDS(0.4747)S(0.4747)CK;
AAPPPPALTPDSQTVDSSCK	AAPPPPALT[79.9663]PDSQTVDSSC[57.0215]K	K	T	981	1000	20	3	19C(57.0215),9T(79.9663)	sp|Q9H7N4|SFR19_HUMAN	Q9H7N4	SFR19_HUMAN	SCAF1	Splicing factor, arginine/serine-rich 19			2	9754771	MS/MS	STY:79.9663@AAPPPPALT(0.8374)PDS(0.0562)QT(0.0562)VDS(0.0251)S(0.0251)CK;
AAPPPPALTPDSQTVDSSCK	AAPPPPALT[79.9663]PDS[79.9663]QTVDSSC[57.0215]K	K	T	981	1000	20	3	12S(79.9663),19C(57.0215),9T(79.9663)	sp|Q9H7N4|SFR19_HUMAN	Q9H7N4	SFR19_HUMAN	SCAF1	Splicing factor, arginine/serine-rich 19			2	1.999422E7	MS/MS	STY:79.9663@AAPPPPALT(0.8833)PDS(0.8770)QT(0.1625)VDS(0.0388)S(0.0385)CK;
AAPPPPPPPPPLESSPR	AAPPPPPPPPPLES[79.9663]SPR	K	V	606	622	17	3	14S(79.9663)	sp|Q5T4S7-2|UBR4_HUMAN	Q5T4S7-2	UBR4_HUMAN	UBR4	Isoform 2 of E3 ubiquitin-protein ligase UBR4		sp|Q5T4S7-3|UBR4_HUMAN, sp|Q5T4S7-4|UBR4_HUMAN, sp|Q5T4S7-5|UBR4_HUMAN, sp|Q5T4S7|UBR4_HUMAN	2	2.1839728E7	MS/MS	STY:79.9663@AAPPPPPPPPPLES(0.5000)S(0.5000)PR;
AAPQSPSVPK	AAPQS[79.9663]PSVPK	K	K	929	938	10	2	5S(79.9663)	sp|O75694-2|NU155_HUMAN	O75694-2	NU155_HUMAN	NUP155	Isoform 2 of Nuclear pore complex protein Nup155		sp|O75694|NU155_HUMAN	6	1.27161416E8	MS/MS	STY:79.9663@AAPQS(0.9464)PS(0.0536)VPK;
AAPSSEGDSCDGVEATEGPGSADTEEPK	AAPSSEGDSC[57.0215]DGVEAT[79.9663]EGPGSADTEEPK	R	S	1307	1334	28	3	10C(57.0215),16T(79.9663)	sp|P39880-2|CUX1_HUMAN	P39880-2	CUX1_HUMAN	CUX1	Isoform 2 of Homeobox protein cut-like 1		sp|P39880-3|CUX1_HUMAN, sp|P39880-4|CUX1_HUMAN, sp|P39880-5|CUX1_HUMAN, sp|P39880-6|CUX1_HUMAN, sp|P39880|CUX1_HUMAN	1	3.7244036E7	MS/MS	STY:79.9663@AAPS(0.0584)S(0.0584)EGDS(0.0584)CDGVEAT(0.8050)EGPGS(0.0099)ADT(0.0099)EEPK;
AAPSSEGDSCDGVEATEGPGSADTEEPK	AAPSSEGDS[79.9663]C[57.0215]DGVEATEGPGSADTEEPK	R	S	1307	1334	28	3	10C(57.0215),9S(79.9663)	sp|P39880-2|CUX1_HUMAN	P39880-2	CUX1_HUMAN	CUX1	Isoform 2 of Homeobox protein cut-like 1		sp|P39880-3|CUX1_HUMAN, sp|P39880-4|CUX1_HUMAN, sp|P39880-5|CUX1_HUMAN, sp|P39880-6|CUX1_HUMAN, sp|P39880|CUX1_HUMAN	1	0	MS/MS	STY:79.9663@AAPS(0.2378)S(0.2378)EGDS(0.2575)CDGVEAT(0.2575)EGPGS(0.0048)ADT(0.0047)EEPK;
AAPSSEGDSCDGVEATEGPGSADTEEPK	AAPSS[79.9663]EGDSC[57.0215]DGVEATEGPGSADTEEPK	R	S	1307	1334	28	3	10C(57.0215),5S(79.9663)	sp|P39880-2|CUX1_HUMAN	P39880-2	CUX1_HUMAN	CUX1	Isoform 2 of Homeobox protein cut-like 1		sp|P39880-3|CUX1_HUMAN, sp|P39880-4|CUX1_HUMAN, sp|P39880-5|CUX1_HUMAN, sp|P39880-6|CUX1_HUMAN, sp|P39880|CUX1_HUMAN	1	3.7244036E7	MS/MS	STY:79.9663@AAPS(0.0098)S(0.4661)EGDS(0.4661)CDGVEAT(0.0086)EGPGS(0.0255)ADT(0.0237)EEPK;
AAPSTAPAEATPPKPGEAEAPPK	AAPSTAPAEAT[79.9663]PPKPGEAEAPPK	R	H	396	418	23	3	11T(79.9663)	sp|O95817|BAG3_HUMAN	O95817	BAG3_HUMAN	BAG3	BAG family molecular chaperone regulator 3			4	6.7378424E7	MS/MS	STY:79.9663@AAPS(0.0302)T(0.0302)APAEAT(0.9397)PPKPGEAEAPPK;
AAPSSEGDSCDGVEATEGPGSADTEEPK	AAPS[79.9663]SEGDSC[57.0215]DGVEAT[79.9663]EGPGSADTEEPK	R	S	1307	1334	28	3	10C(57.0215),16T(79.9663),4S(79.9663)	sp|P39880-2|CUX1_HUMAN	P39880-2	CUX1_HUMAN	CUX1	Isoform 2 of Homeobox protein cut-like 1		sp|P39880-3|CUX1_HUMAN, sp|P39880-4|CUX1_HUMAN, sp|P39880-5|CUX1_HUMAN, sp|P39880-6|CUX1_HUMAN, sp|P39880|CUX1_HUMAN	1	3.4363344E7	MS/MS	STY:79.9663@AAPS(0.7201)S(0.0358)EGDS(0.4201)CDGVEAT(0.7383)EGPGS(0.0429)ADT(0.0429)EEPK;
AAPSSEGDSCDGVEATEGPGSADTEEPK	AAPS[79.9663]S[79.9663]EGDSC[57.0215]DGVEATEGPGSADTEEPK	R	S	1307	1334	28	3	10C(57.0215),4S(79.9663),5S(79.9663)	sp|P39880-2|CUX1_HUMAN	P39880-2	CUX1_HUMAN	CUX1	Isoform 2 of Homeobox protein cut-like 1		sp|P39880-3|CUX1_HUMAN, sp|P39880-4|CUX1_HUMAN, sp|P39880-5|CUX1_HUMAN, sp|P39880-6|CUX1_HUMAN, sp|P39880|CUX1_HUMAN	1	3.4363344E7	MS/MS	STY:79.9663@AAPS(0.6603)S(0.6142)EGDS(0.0271)CDGVEAT(0.5942)EGPGS(0.0441)ADT(0.0602)EEPK;
AAQQDSDSDGEALGGNPMVAGFQDDVDLEDQPR	AAQQDS[79.9663]DS[79.9663]DGEALGGNPM[15.9949]VAGFQDDVDLEDQPR	K	G	421	453	33	3	18M(15.9949),6S(79.9663),8S(79.9663)	sp|Q3YEC7-2|RABL6_HUMAN	Q3YEC7-2	RABL6_HUMAN	RABL6	Isoform 2 of Rab-like protein 6		sp|Q3YEC7|RABL6_HUMAN	2	3.8260208E7	MS/MS	M:15.9949@AAQQDSDSDGEALGGNPM(1.0000)VAGFQDDVDLEDQPR;STY:79.9663@AAQQDS(1.0000)DS(1.0000)DGEALGGNPMVAGFQDDVDLEDQPR;
AASADSTTEGTPADGFTVLSTK	AASADSTTEGTPADGFTVLS[79.9663]T[79.9663]K	K	S	168	189	22	2	20S(79.9663),21T(79.9663)	sp|O75367-1|H2AY_HUMAN	O75367-1	H2AY_HUMAN	MACROH2A1	Isoform 2 of Core histone macro-H2A.1		sp|O75367-3|H2AY_HUMAN, sp|O75367|H2AY_HUMAN	1	1.2982538E7	MS/MS	STY:79.9663@AAS(0.0625)ADS(0.0262)T(0.0281)T(0.0291)EGT(0.0291)PADGFT(0.0228)VLS(0.9011)T(0.9011)K;
AASDPLLSSVSPAVSK	AASDPLLS[79.9663]SVSPAVS[79.9663]K	R	A	546	561	16	2	15S(79.9663),8S(79.9663)	sp|P19532|TFE3_HUMAN	P19532	TFE3_HUMAN	TFE3	Transcription factor E3			1	3.7691464E7	MS/MS	STY:79.9663@AAS(0.0273)DPLLS(0.6120)S(0.6120)VS(0.0377)PAVS(0.7111)K;
AASEQQADTSGGDSPK	AASEQQADTS[79.9663]GGDSPK	K	D	123	138	16	2	10S(79.9663)	sp|P85037-2|FOXK1_HUMAN	P85037-2	FOXK1_HUMAN	FOXK1	Isoform 2 of Forkhead box protein K1		sp|P85037|FOXK1_HUMAN	1	8.3979448E7	MS/MS	STY:79.9663@AAS(0.0359)EQQADT(0.0771)S(0.4435)GGDS(0.4435)PK;
AASEQQADTSGGDSPK	AASEQQADT[79.9663]SGGDSPK	K	D	123	138	16	2	9T(79.9663)	sp|P85037-2|FOXK1_HUMAN	P85037-2	FOXK1_HUMAN	FOXK1	Isoform 2 of Forkhead box protein K1		sp|P85037|FOXK1_HUMAN	2	8.3979448E7	MS/MS	STY:79.9663@AAS(0.0204)EQQADT(0.4725)S(0.4725)GGDS(0.0346)PK;
AASEQQADTSGGDSPK	AASEQQADT[79.9663]SGGDS[79.9663]PK	K	D	123	138	16	2	14S(79.9663),9T(79.9663)	sp|P85037-2|FOXK1_HUMAN	P85037-2	FOXK1_HUMAN	FOXK1	Isoform 2 of Forkhead box protein K1		sp|P85037|FOXK1_HUMAN	2	9.8262144E7	MS/MS	STY:79.9663@AAS(0.0628)EQQADT(0.6237)S(0.6237)GGDS(0.6897)PK;
AASEQQADTSGGDSPK	AASEQQADT[79.9663]S[79.9663]GGDSPK	K	D	123	138	16	2	10S(79.9663),9T(79.9663)	sp|P85037-2|FOXK1_HUMAN	P85037-2	FOXK1_HUMAN	FOXK1	Isoform 2 of Forkhead box protein K1		sp|P85037|FOXK1_HUMAN	1	9.8262144E7	MS/MS	STY:79.9663@AAS(0.0704)EQQADT(0.8829)S(0.8841)GGDS(0.1626)PK;
AASPPASASDLIEQQQK	AASPPAS[79.9663]ASDLIEQQQK	R	R	333	349	17	2	7S(79.9663)	sp|Q5VSL9|STRP1_HUMAN	Q5VSL9	STRP1_HUMAN	STRIP1	Striatin-interacting protein 1		sp|Q5VSL9-2|STRP1_HUMAN, sp|Q5VSL9-3|STRP1_HUMAN	3	2.43905344E8	MS/MS	STY:79.9663@AAS(0.0295)PPAS(0.9408)AS(0.0297)DLIEQQQK;
AASPSPQSVR	AASPSPQS[79.9663]VR	K	R	736	745	10	2	8S(79.9663)	sp|Q8IYB3|SRRM1_HUMAN	Q8IYB3	SRRM1_HUMAN	SRRM1	Serine/arginine repetitive matrix protein 1		sp|Q8IYB3-2|SRRM1_HUMAN	2	4.7012612E7	MS/MS	STY:79.9663@AAS(0.0289)PS(0.0289)PQS(0.9422)VR;
AASPSPQSVR	AASPS[79.9663]PQS[79.9663]VR	K	R	736	745	10	2	5S(79.9663),8S(79.9663)	sp|Q8IYB3|SRRM1_HUMAN	Q8IYB3	SRRM1_HUMAN	SRRM1	Serine/arginine repetitive matrix protein 1		sp|Q8IYB3-2|SRRM1_HUMAN	5	2.32382874E9	MS/MS	STY:79.9663@AAS(0.1197)PS(0.9402)PQS(0.9402)VR;
AASPVLQEDIDIEGVQSEGQDNGAEDSGDTEDELR	AASPVLQEDIDIEGVQS[79.9663]EGQDNGAEDS[79.9663]GDTEDELR	K	R	459	493	35	3	17S(79.9663),27S(79.9663)	sp|P18887|XRCC1_HUMAN	P18887	XRCC1_HUMAN	XRCC1	DNA repair protein XRCC1			1	0	MS/MS	STY:79.9663@AAS(0.4855)PVLQEDIDIEGVQS(0.4984)EGQDNGAEDS(0.5188)GDT(0.4973)EDELR;
AASQGSDSPLLPAQR	AASQGS[79.9663]DSPLLPAQR	R	N	843	857	15	2	6S(79.9663)	sp|Q5TCZ1-2|SPD2A_HUMAN	Q5TCZ1-2	SPD2A_HUMAN	SH3PXD2A	Isoform 2 of SH3 and PX domain-containing protein 2A		sp|Q5TCZ1-3|SPD2A_HUMAN, sp|Q5TCZ1|SPD2A_HUMAN	1	7895162	MS/MS	STY:79.9663@AAS(0.0494)QGS(0.9224)DS(0.0281)PLLPAQR;
AASSSSPGSPVASSPSR	AASSSSPGSPVASSPS[79.9663]R	R	L	1772	1788	17	2	16S(79.9663)	sp|Q92538-3|GBF1_HUMAN	Q92538-3	GBF1_HUMAN	GBF1	Isoform 3 of Golgi-specific brefeldin A-resistance guanine nucleotide exchange factor 1		sp|Q92538-2|GBF1_HUMAN, sp|Q92538|GBF1_HUMAN	1	4.2026932E7	MS/MS	STY:79.9663@AAS(0.1391)S(0.1391)S(0.1391)S(0.1391)PGS(0.0050)PVAS(0.0050)S(0.0050)PS(0.4286)R;
AASSSSPGSPVASSPSR	AASSSSPGSPVASS[79.9663]PSR	R	L	1772	1788	17	2	14S(79.9663)	sp|Q92538-3|GBF1_HUMAN	Q92538-3	GBF1_HUMAN	GBF1	Isoform 3 of Golgi-specific brefeldin A-resistance guanine nucleotide exchange factor 1		sp|Q92538-2|GBF1_HUMAN, sp|Q92538|GBF1_HUMAN	1	4.2026932E7	MS/MS	STY:79.9663@AAS(0.0099)S(0.0099)S(0.0099)S(0.0099)PGS(0.0383)PVAS(0.0713)S(0.8191)PS(0.0316)R;
AASSSSPGSPVASSPSR	AASSSSPGSPVAS[79.9663]SPSR	R	L	1772	1788	17	2	13S(79.9663)	sp|Q92538-3|GBF1_HUMAN	Q92538-3	GBF1_HUMAN	GBF1	Isoform 3 of Golgi-specific brefeldin A-resistance guanine nucleotide exchange factor 1		sp|Q92538-2|GBF1_HUMAN, sp|Q92538|GBF1_HUMAN	1	1.725567E7	MS/MS	STY:79.9663@AAS(0.0132)S(0.0088)S(0.0088)S(0.0088)PGS(0.1749)PVAS(0.3857)S(0.3857)PS(0.0141)R;
AASSSSPGSPVASSPSR	AASSSSPGSPVAS[79.9663]S[79.9663]PSR	R	L	1772	1788	17	2	13S(79.9663),14S(79.9663)	sp|Q92538-3|GBF1_HUMAN	Q92538-3	GBF1_HUMAN	GBF1	Isoform 3 of Golgi-specific brefeldin A-resistance guanine nucleotide exchange factor 1		sp|Q92538-2|GBF1_HUMAN, sp|Q92538|GBF1_HUMAN	1	2.43413728E8	MS/MS	STY:79.9663@AAS(0.3067)S(0.3067)S(0.3067)S(0.3067)PGS(0.0140)PVAS(0.3752)S(0.3752)PS(0.0089)R;
AASSSSPGSPVASSPSR	AASSSS[79.9663]PGSPVASSPSR	R	L	1772	1788	17	2	6S(79.9663)	sp|Q92538-3|GBF1_HUMAN	Q92538-3	GBF1_HUMAN	GBF1	Isoform 3 of Golgi-specific brefeldin A-resistance guanine nucleotide exchange factor 1		sp|Q92538-2|GBF1_HUMAN, sp|Q92538|GBF1_HUMAN	1	1.725567E7	MS/MS	STY:79.9663@AAS(0.0096)S(0.0096)S(0.0096)S(0.4201)PGS(0.4201)PVAS(0.0437)S(0.0437)PS(0.0437)R;
AASSSSPGSPVASSPSR	AASSS[79.9663]SPGSPVASSPSR	R	L	1772	1788	17	2	5S(79.9663)	sp|Q92538-3|GBF1_HUMAN	Q92538-3	GBF1_HUMAN	GBF1	Isoform 3 of Golgi-specific brefeldin A-resistance guanine nucleotide exchange factor 1		sp|Q92538-2|GBF1_HUMAN, sp|Q92538|GBF1_HUMAN	1	1.2207945E7	MS/MS	STY:79.9663@AAS(0.0088)S(0.0088)S(0.8487)S(0.0317)PGS(0.0185)PVAS(0.0278)S(0.0278)PS(0.0278)R;
AASSSSPGSPVASSPSR	AASSS[79.9663]S[79.9663]PGSPVASSPSR	R	L	1772	1788	17	2	5S(79.9663),6S(79.9663)	sp|Q92538-3|GBF1_HUMAN	Q92538-3	GBF1_HUMAN	GBF1	Isoform 3 of Golgi-specific brefeldin A-resistance guanine nucleotide exchange factor 1		sp|Q92538-2|GBF1_HUMAN, sp|Q92538|GBF1_HUMAN	1	3.8062408E7	MS/MS	STY:79.9663@AAS(0.0670)S(0.0670)S(0.3110)S(0.3110)PGS(0.3110)PVAS(0.3110)S(0.3110)PS(0.3110)R;
AASSSSPGSPVASSPSR	AASS[79.9663]SSPGS[79.9663]PVASSPSR	R	L	1772	1788	17	2	4S(79.9663),9S(79.9663)	sp|Q92538-3|GBF1_HUMAN	Q92538-3	GBF1_HUMAN	GBF1	Isoform 3 of Golgi-specific brefeldin A-resistance guanine nucleotide exchange factor 1		sp|Q92538-2|GBF1_HUMAN, sp|Q92538|GBF1_HUMAN	1	2.42206896E8	MS/MS	STY:79.9663@AAS(0.0152)S(0.5774)S(0.5774)S(0.0202)PGS(0.7637)PVAS(0.0161)S(0.0150)PS(0.0150)R;
AASSSSPGSPVASSPSR	AASS[79.9663]S[79.9663]SPGSPVASSPSR	R	L	1772	1788	17	2	4S(79.9663),5S(79.9663)	sp|Q92538-3|GBF1_HUMAN	Q92538-3	GBF1_HUMAN	GBF1	Isoform 3 of Golgi-specific brefeldin A-resistance guanine nucleotide exchange factor 1		sp|Q92538-2|GBF1_HUMAN, sp|Q92538|GBF1_HUMAN	1	2.43413728E8	MS/MS	STY:79.9663@AAS(0.0227)S(0.2950)S(0.2950)S(0.2950)PGS(0.2950)PVAS(0.2950)S(0.2950)PS(0.2075)R;
AASSSSPGSPVASSPSR	AASS[79.9663]S[79.9663]S[79.9663]PGSPVASSPSR	R	L	1772	1788	17	2	4S(79.9663),5S(79.9663),6S(79.9663)	sp|Q92538-3|GBF1_HUMAN	Q92538-3	GBF1_HUMAN	GBF1	Isoform 3 of Golgi-specific brefeldin A-resistance guanine nucleotide exchange factor 1		sp|Q92538-2|GBF1_HUMAN, sp|Q92538|GBF1_HUMAN	1	3.8686232E7	MS/MS	STY:79.9663@AAS(0.0355)S(0.8356)S(0.8357)S(0.8357)PGS(0.1075)PVAS(0.1075)S(0.1075)PS(0.1351)R;
AASYTEEDENHTAK	AASYT[79.9663]EEDENHTAK	K	D	780	793	14	2	5T(79.9663)	sp|Q14126|DSG2_HUMAN	Q14126	DSG2_HUMAN	DSG2	Desmoglein-2			1	1.2273874E7	MS/MS	STY:79.9663@AAS(0.0270)Y(0.0270)T(0.9252)EEDENHT(0.0209)AK;
AASADSTTEGTPADGFTVLSTK	AAS[79.9663]ADS[79.9663]TTEGTPADGFTVLSTK	K	S	168	189	22	3	3S(79.9663),6S(79.9663)	sp|O75367-1|H2AY_HUMAN	O75367-1	H2AY_HUMAN	MACROH2A1	Isoform 2 of Core histone macro-H2A.1		sp|O75367-3|H2AY_HUMAN, sp|O75367|H2AY_HUMAN	1	0	MS/MS	STY:79.9663@AAS(0.4047)ADS(0.3063)T(0.3063)T(0.3063)EGT(0.3063)PADGFT(0.0897)VLS(0.1401)T(0.1401)K;
AASEQQADTSGGDSPK	AAS[79.9663]EQQADTSGGDSPK	K	D	123	138	16	2	3S(79.9663)	sp|P85037-2|FOXK1_HUMAN	P85037-2	FOXK1_HUMAN	FOXK1	Isoform 2 of Forkhead box protein K1		sp|P85037|FOXK1_HUMAN	2	8.3979448E7	MS/MS	STY:79.9663@AAS(0.9375)EQQADT(0.0212)S(0.0212)GGDS(0.0202)PK;
AASEQQADTSGGDSPK	AAS[79.9663]EQQADT[79.9663]SGGDSPK	K	D	123	138	16	2	3S(79.9663),9T(79.9663)	sp|P85037-2|FOXK1_HUMAN	P85037-2	FOXK1_HUMAN	FOXK1	Isoform 2 of Forkhead box protein K1		sp|P85037|FOXK1_HUMAN	1	9.8262144E7	MS/MS	STY:79.9663@AAS(0.5729)EQQADT(0.5170)S(0.5170)GGDS(0.3931)PK;
AASLTEDR	AAS[79.9663]LTEDR	K	D	1167	1174	8	2	3S(79.9663)	sp|Q04637-3|IF4G1_HUMAN	Q04637-3	IF4G1_HUMAN	EIF4G1	Isoform B of Eukaryotic translation initiation factor 4 gamma 1		sp|Q04637-4|IF4G1_HUMAN, sp|Q04637-5|IF4G1_HUMAN, sp|Q04637-6|IF4G1_HUMAN, sp|Q04637-7|IF4G1_HUMAN, sp|Q04637-8|IF4G1_HUMAN, sp|Q04637-9|IF4G1_HUMAN, sp|Q04637|IF4G1_HUMAN	5	4.32375232E8	MS/MS	STY:79.9663@AAS(0.9466)LT(0.0534)EDR;
AASPESASSTPESLQAR	AAS[79.9663]PESASSTPESLQAR	R	R	395	411	17	2	3S(79.9663)	sp|Q96BT3|CENPT_HUMAN	Q96BT3	CENPT_HUMAN	CENPT	Centromere protein T			1	0	MS/MS	STY:79.9663@AAS(0.4816)PES(0.4816)AS(0.0088)S(0.0088)T(0.0088)PES(0.0104)LQAR;
AASPPASASDLIEQQQK	AAS[79.9663]PPASASDLIEQQQK	R	R	333	349	17	2	3S(79.9663)	sp|Q5VSL9|STRP1_HUMAN	Q5VSL9	STRP1_HUMAN	STRIP1	Striatin-interacting protein 1		sp|Q5VSL9-2|STRP1_HUMAN, sp|Q5VSL9-3|STRP1_HUMAN	10	2.43905344E8	MS/MS	STY:79.9663@AAS(0.9456)PPAS(0.0272)AS(0.0272)DLIEQQQK;
AASPSPQSVR	AAS[79.9663]PSPQSVR	K	R	736	745	10	2	3S(79.9663)	sp|Q8IYB3|SRRM1_HUMAN	Q8IYB3	SRRM1_HUMAN	SRRM1	Serine/arginine repetitive matrix protein 1		sp|Q8IYB3-2|SRRM1_HUMAN	8	2.4634048E8	MS/MS	STY:79.9663@AAS(0.9456)PS(0.0272)PQS(0.0272)VR;
AASPSPQSVR	AAS[79.9663]PSPQS[79.9663]VR	K	R	736	745	10	2	3S(79.9663),8S(79.9663)	sp|Q8IYB3|SRRM1_HUMAN	Q8IYB3	SRRM1_HUMAN	SRRM1	Serine/arginine repetitive matrix protein 1		sp|Q8IYB3-2|SRRM1_HUMAN	5	2.3043817E9	MS/MS	STY:79.9663@AAS(0.9469)PS(0.1062)PQS(0.9470)VR;
AASPSPQSVR	AAS[79.9663]PS[79.9663]PQSVR	K	R	736	745	10	2	3S(79.9663),5S(79.9663)	sp|Q8IYB3|SRRM1_HUMAN	Q8IYB3	SRRM1_HUMAN	SRRM1	Serine/arginine repetitive matrix protein 1		sp|Q8IYB3-2|SRRM1_HUMAN	21	2.32382874E9	MS/MS	STY:79.9663@AAS(0.9497)PS(0.9497)PQS(0.1006)VR;
AASPSPQSVR	AAS[79.9663]PS[79.9663]PQS[79.9663]VR	K	R	736	745	10	2	3S(79.9663),5S(79.9663),8S(79.9663)	sp|Q8IYB3|SRRM1_HUMAN	Q8IYB3	SRRM1_HUMAN	SRRM1	Serine/arginine repetitive matrix protein 1		sp|Q8IYB3-2|SRRM1_HUMAN	13	1.7355968E8	MS/MS	STY:79.9663@AAS(1.0000)PS(1.0000)PQS(1.0000)VR;
AASPVLQEDIDIEGVQSEGQDNGAEDSGDTEDELR	AAS[79.9663]PVLQEDIDIEGVQSEGQDNGAEDSGDTEDELR	K	R	459	493	35	3	3S(79.9663)	sp|P18887|XRCC1_HUMAN	P18887	XRCC1_HUMAN	XRCC1	DNA repair protein XRCC1			1	0	MS/MS	STY:79.9663@AAS(0.4638)PVLQEDIDIEGVQS(0.4129)EGQDNGAEDS(0.0758)GDT(0.0475)EDELR;
AASPVLQEDIDIEGVQSEGQDNGAEDSGDTEDELR	AAS[79.9663]PVLQEDIDIEGVQSEGQDNGAEDS[79.9663]GDTEDELR	K	R	459	493	35	3	27S(79.9663),3S(79.9663)	sp|P18887|XRCC1_HUMAN	P18887	XRCC1_HUMAN	XRCC1	DNA repair protein XRCC1			2	0	MS/MS	STY:79.9663@AAS(0.7040)PVLQEDIDIEGVQS(0.5861)EGQDNGAEDS(0.6662)GDT(0.0438)EDELR;
AASSDQLR	AAS[79.9663]SDQLR	R	D	953	960	8	2	3S(79.9663)	sp|Q9UDY2-3|ZO2_HUMAN	Q9UDY2-3	ZO2_HUMAN	TJP2	Isoform C1 of Tight junction protein ZO-2		sp|Q9UDY2-7|ZO2_HUMAN, sp|Q9UDY2|ZO2_HUMAN	2	5.2976116E7	MS/MS	STY:79.9663@AAS(0.9470)S(0.0530)DQLR;
AASSSSPGSPVASSPSR	AAS[79.9663]SSSPGSPVASSPSR	R	L	1772	1788	17	2	3S(79.9663)	sp|Q92538-3|GBF1_HUMAN	Q92538-3	GBF1_HUMAN	GBF1	Isoform 3 of Golgi-specific brefeldin A-resistance guanine nucleotide exchange factor 1		sp|Q92538-2|GBF1_HUMAN, sp|Q92538|GBF1_HUMAN	2	4.2026932E7	MS/MS	STY:79.9663@AAS(0.1981)S(0.1981)S(0.1981)S(0.1981)PGS(0.1981)PVAS(0.0031)S(0.0031)PS(0.0031)R;
AASSSSPGSPVASSPSR	AAS[79.9663]SSSPGS[79.9663]PVASSPSR	R	L	1772	1788	17	2	3S(79.9663),9S(79.9663)	sp|Q92538-3|GBF1_HUMAN	Q92538-3	GBF1_HUMAN	GBF1	Isoform 3 of Golgi-specific brefeldin A-resistance guanine nucleotide exchange factor 1		sp|Q92538-2|GBF1_HUMAN, sp|Q92538|GBF1_HUMAN	4	2.81476128E8	MS/MS	STY:79.9663@AAS(0.5789)S(0.5789)S(0.0166)S(0.0151)PGS(0.7660)PVAS(0.0148)S(0.0148)PS(0.0148)R;
AASSSSPGSPVASSPSR	AAS[79.9663]S[79.9663]SSPGSPVASSPSR	R	L	1772	1788	17	2	3S(79.9663),4S(79.9663)	sp|Q92538-3|GBF1_HUMAN	Q92538-3	GBF1_HUMAN	GBF1	Isoform 3 of Golgi-specific brefeldin A-resistance guanine nucleotide exchange factor 1		sp|Q92538-2|GBF1_HUMAN, sp|Q92538|GBF1_HUMAN	3	3.8062408E7	MS/MS	STY:79.9663@AAS(0.4269)S(0.4269)S(0.4269)S(0.3015)PGS(0.3015)PVAS(0.0388)S(0.0388)PS(0.0388)R;
AASSSSPGSPVASSPSR	AAS[79.9663]S[79.9663]S[79.9663]SPGSPVASSPSR	R	L	1772	1788	17	2	3S(79.9663),4S(79.9663),5S(79.9663)	sp|Q92538-3|GBF1_HUMAN	Q92538-3	GBF1_HUMAN	GBF1	Isoform 3 of Golgi-specific brefeldin A-resistance guanine nucleotide exchange factor 1		sp|Q92538-2|GBF1_HUMAN, sp|Q92538|GBF1_HUMAN	4	3.8686232E7	MS/MS	STY:79.9663@AAS(0.4248)S(0.4248)S(0.4248)S(0.4248)PGS(0.0263)PVAS(0.4248)S(0.4248)PS(0.4248)R;
AASYTEEDENHTAK	AAS[79.9663]YTEEDENHTAK	K	D	780	793	14	2	3S(79.9663)	sp|Q14126|DSG2_HUMAN	Q14126	DSG2_HUMAN	DSG2	Desmoglein-2			1	1.2273874E7	MS/MS	STY:79.9663@AAS(0.9325)Y(0.0233)T(0.0197)EEDENHT(0.0244)AK;
AATAARPPAPPPAPQPPSPTPSPPRPTLAR	AATAARPPAPPPAPQPPSPTPS[79.9663]PPRPT[79.9663]LAR	R	E	91	120	30	3	22S(79.9663),27T(79.9663)	sp|Q96B36-3|AKTS1_HUMAN	Q96B36-3	AKTS1_HUMAN	AKT1S1	Isoform 3 of Proline-rich AKT1 substrate 1		sp|Q96B36|AKTS1_HUMAN	1	0	MS/MS	STY:79.9663@AAT(0.0788)AARPPAPPPAPQPPS(0.1080)PT(0.0518)PS(0.8803)PPRPT(0.8811)LAR;
AATAARPPAPPPAPQPPSPTPSPPRPTLAR	AATAARPPAPPPAPQPPSPT[79.9663]PSPPRPT[79.9663]LAR	R	E	91	120	30	3,4	20T(79.9663),27T(79.9663)	sp|Q96B36-3|AKTS1_HUMAN	Q96B36-3	AKTS1_HUMAN	AKT1S1	Isoform 3 of Proline-rich AKT1 substrate 1		sp|Q96B36|AKTS1_HUMAN	5	0	MS/MS	STY:79.9663@AAT(0.0788)AARPPAPPPAPQPPS(0.0640)PT(0.8985)PS(0.0599)PPRPT(0.8988)LAR;
AATAARPPAPPPAPQPPSPTPSPPRPTLAR	AATAARPPAPPPAPQPPSPT[79.9663]PS[79.9663]PPRPTLAR	R	E	91	120	30	3,4	20T(79.9663),22S(79.9663)	sp|Q96B36-3|AKTS1_HUMAN	Q96B36-3	AKTS1_HUMAN	AKT1S1	Isoform 3 of Proline-rich AKT1 substrate 1		sp|Q96B36|AKTS1_HUMAN	5	7.6428979E8	MS/MS	STY:79.9663@AAT(0.0551)AARPPAPPPAPQPPS(0.0460)PT(0.9221)PS(0.9209)PPRPT(0.0558)LAR;
AATAARPPAPPPAPQPPSPTPSPPRPTLAR	AATAARPPAPPPAPQPPS[79.9663]PTPSPPRPT[79.9663]LAR	R	E	91	120	30	3,4	18S(79.9663),27T(79.9663)	sp|Q96B36-3|AKTS1_HUMAN	Q96B36-3	AKTS1_HUMAN	AKT1S1	Isoform 3 of Proline-rich AKT1 substrate 1		sp|Q96B36|AKTS1_HUMAN	9	1.36571418E9	MS/MS	STY:79.9663@AAT(0.0535)AARPPAPPPAPQPPS(0.9328)PT(0.0376)PS(0.0412)PPRPT(0.9349)LAR;
AATAARPPAPPPAPQPPSPTPSPPRPTLAR	AATAARPPAPPPAPQPPS[79.9663]PTPS[79.9663]PPRPTLAR	R	E	91	120	30	3,4	18S(79.9663),22S(79.9663)	sp|Q96B36-3|AKTS1_HUMAN	Q96B36-3	AKTS1_HUMAN	AKT1S1	Isoform 3 of Proline-rich AKT1 substrate 1		sp|Q96B36|AKTS1_HUMAN	8	1.36571418E9	MS/MS	STY:79.9663@AAT(0.0607)AARPPAPPPAPQPPS(0.9202)PT(0.0621)PS(0.9176)PPRPT(0.0394)LAR;
AATAARPPAPPPAPQPPSPTPSPPR	AATAARPPAPPPAPQPPS[79.9663]PT[79.9663]PSPPR	R	P	91	115	25	3	18S(79.9663),20T(79.9663)	sp|Q96B36-3|AKTS1_HUMAN	Q96B36-3	AKTS1_HUMAN	AKT1S1	Isoform 3 of Proline-rich AKT1 substrate 1		sp|Q96B36|AKTS1_HUMAN	4	3.4259152E7	MS/MS	STY:79.9663@AAT(0.0625)AARPPAPPPAPQPPS(0.6899)PT(0.6238)PS(0.6238)PPR;
AATAARPPAPPPAPQPPSPTPSPPRPTLAR	AATAARPPAPPPAPQPPS[79.9663]PT[79.9663]PSPPRPTLAR	R	E	91	120	30	3,4	18S(79.9663),20T(79.9663)	sp|Q96B36-3|AKTS1_HUMAN	Q96B36-3	AKTS1_HUMAN	AKT1S1	Isoform 3 of Proline-rich AKT1 substrate 1		sp|Q96B36|AKTS1_HUMAN	14	6.7344704E8	MS/MS	STY:79.9663@AAT(0.0806)AARPPAPPPAPQPPS(0.8964)PT(0.8980)PS(0.0556)PPRPT(0.0694)LAR;
AATAARPPAPPPAPQPPSPTPSPPRPTLAR	AAT[79.9663]AARPPAPPPAPQPPSPTPSPPRPT[79.9663]LAR	R	E	91	120	30	3,4	27T(79.9663),3T(79.9663)	sp|Q96B36-3|AKTS1_HUMAN	Q96B36-3	AKTS1_HUMAN	AKT1S1	Isoform 3 of Proline-rich AKT1 substrate 1		sp|Q96B36|AKTS1_HUMAN	2	7.2022624E7	MS/MS	STY:79.9663@AAT(0.5428)AARPPAPPPAPQPPS(0.4698)PT(0.0397)PS(0.4230)PPRPT(0.5246)LAR;
AATAARPPAPPPAPQPPSPTPSPPRPTLAR	AAT[79.9663]AARPPAPPPAPQPPS[79.9663]PTPSPPRPTLAR	R	E	91	120	30	4	18S(79.9663),3T(79.9663)	sp|Q96B36-3|AKTS1_HUMAN	Q96B36-3	AKTS1_HUMAN	AKT1S1	Isoform 3 of Proline-rich AKT1 substrate 1		sp|Q96B36|AKTS1_HUMAN	1	0	MS/MS	STY:79.9663@AAT(0.4266)AARPPAPPPAPQPPS(0.3933)PT(0.3933)PS(0.3933)PPRPT(0.3933)LAR;
AAVGQESPGGLEAGNAK	AAVGQES[79.9663]PGGLEAGNAK	R	A	1299	1315	17	2	7S(79.9663)	sp|Q29RF7|PDS5A_HUMAN	Q29RF7	PDS5A_HUMAN	PDS5A	Sister chromatid cohesion protein PDS5 homolog A			5	7.9754592E7	MS/MS	STY:79.9663@AAVGQES(1.0000)PGGLEAGNAK;
AAVLSDSEDEEK	AAVLSDS[79.9663]EDEEK	K	A	394	405	12	2	7S(79.9663)	sp|Q96ST2|IWS1_HUMAN	Q96ST2	IWS1_HUMAN	IWS1	Protein IWS1 homolog		sp|Q96ST2-2|IWS1_HUMAN, sp|Q96ST2-3|IWS1_HUMAN	1	3.8756336E7	MS/MS	STY:79.9663@AAVLS(0.0565)DS(0.9435)EDEEK;
AAVLSDSEDEEK	AAVLS[79.9663]DSEDEEK	K	A	394	405	12	2	5S(79.9663)	sp|Q96ST2|IWS1_HUMAN	Q96ST2	IWS1_HUMAN	IWS1	Protein IWS1 homolog		sp|Q96ST2-2|IWS1_HUMAN, sp|Q96ST2-3|IWS1_HUMAN	3	5.2742416E7	MS/MS	STY:79.9663@AAVLS(0.5000)DS(0.5000)EDEEK;
AAVLSDSEDEEK	AAVLS[79.9663]DS[79.9663]EDEEK	K	A	394	405	12	2	5S(79.9663),7S(79.9663)	sp|Q96ST2|IWS1_HUMAN	Q96ST2	IWS1_HUMAN	IWS1	Protein IWS1 homolog		sp|Q96ST2-2|IWS1_HUMAN, sp|Q96ST2-3|IWS1_HUMAN	12	9.1762739E8	MS/MS	STY:79.9663@AAVLS(1.0000)DS(1.0000)EDEEK;
AAVQELSSSILAGEDPEER	AAVQELS[79.9663]SSILAGEDPEER	R	G	355	373	19	2	7S(79.9663)	sp|P49768-2|PSN1_HUMAN	P49768-2	PSN1_HUMAN	PSEN1	Isoform 2 of Presenilin-1		sp|P49768-7|PSN1_HUMAN, sp|P49768|PSN1_HUMAN	2	2.8655072E7	MS/MS	STY:79.9663@AAVQELS(0.4872)S(0.4872)S(0.0257)ILAGEDPEER;
AAVQELSSSILAGEDPEER	AAVQELS[79.9663]S[79.9663]SILAGEDPEER	R	G	355	373	19	2	7S(79.9663),8S(79.9663)	sp|P49768-2|PSN1_HUMAN	P49768-2	PSN1_HUMAN	PSEN1	Isoform 2 of Presenilin-1		sp|P49768-7|PSN1_HUMAN, sp|P49768|PSN1_HUMAN	1	2.3061076E7	MS/MS	STY:79.9663@AAVQELS(0.6667)S(0.6667)S(0.6667)ILAGEDPEER;
AAVVTSPPPTTAPHK	AAVVT[79.9663]SPPPTTAPHK	R	E	7	21	15	2	5T(79.9663)	sp|P35611-2|ADDA_HUMAN	P35611-2	ADDA_HUMAN	ADD1	Isoform 2 of Alpha-adducin		sp|P35611-3|ADDA_HUMAN, sp|P35611-4|ADDA_HUMAN, sp|P35611-5|ADDA_HUMAN, sp|P35611-6|ADDA_HUMAN, sp|P35611|ADDA_HUMAN	1	1.5904794E7	MS/MS	STY:79.9663@AAVVT(0.4835)S(0.4835)PPPT(0.0165)T(0.0165)APHK;
AAYGDLSSEEEEENEPESLGVVYK	AAYGDLS[79.9663]S[79.9663]EEEEENEPESLGVVYK	K	S	78	101	24	3	7S(79.9663),8S(79.9663)	sp|O15541|R113A_HUMAN	O15541	R113A_HUMAN	RNF113A	E3 ubiquitin-protein ligase RNF113A			2	2.69161824E8	MS/MS	STY:79.9663@AAY(0.0681)GDLS(0.8929)S(0.8929)EEEEENEPES(0.0585)LGVVY(0.0876)K;
AAYGDLSSEEEEENEPESLGVVYK	AAY[79.9663]GDLS[79.9663]SEEEEENEPESLGVVYK	K	S	78	101	24	3	3Y(79.9663),7S(79.9663)	sp|O15541|R113A_HUMAN	O15541	R113A_HUMAN	RNF113A	E3 ubiquitin-protein ligase RNF113A			2	2.69161824E8	MS/MS	STY:79.9663@AAY(0.6260)GDLS(0.6260)S(0.6260)EEEEENEPES(0.0588)LGVVY(0.0631)K;
ACASPSAQVEGSPVAGSDGSQPAVK	AC[57.0215]ASPSAQVEGSPVAGS[79.9663]DGS[79.9663]QPAVK	R	L	248	272	25	3	17S(79.9663),20S(79.9663),2C(57.0215)	sp|Q9UFC0|LRWD1_HUMAN	Q9UFC0	LRWD1_HUMAN	LRWD1	Leucine-rich repeat and WD repeat-containing protein 1			1	5.3979632E7	MS/MS	STY:79.9663@ACAS(0.3877)PS(0.3877)AQVEGS(0.3877)PVAGS(0.4185)DGS(0.4185)QPAVK;
ACASPSAQVEGSPVAGSDGSQPAVK	AC[57.0215]ASPSAQVEGS[79.9663]PVAGSDGSQPAVK	R	L	248	272	25	3	12S(79.9663),2C(57.0215)	sp|Q9UFC0|LRWD1_HUMAN	Q9UFC0	LRWD1_HUMAN	LRWD1	Leucine-rich repeat and WD repeat-containing protein 1			1	1.2941788E7	MS/MS	STY:79.9663@ACAS(0.1161)PS(0.3927)AQVEGS(0.4712)PVAGS(0.0104)DGS(0.0097)QPAVK;
ACASPSAQVEGSPVAGSDGSQPAVK	AC[57.0215]ASPSAQVEGS[79.9663]PVAGS[79.9663]DGSQPAVK	R	L	248	272	25	3	12S(79.9663),17S(79.9663),2C(57.0215)	sp|Q9UFC0|LRWD1_HUMAN	Q9UFC0	LRWD1_HUMAN	LRWD1	Leucine-rich repeat and WD repeat-containing protein 1			1	3.6205272E7	MS/MS	STY:79.9663@ACAS(0.3888)PS(0.3888)AQVEGS(0.5142)PVAGS(0.5142)DGS(0.1939)QPAVK;
ACASPSAQVEGSPVAGSDGSQPAVK	AC[57.0215]ASPS[79.9663]AQVEGSPVAGSDGSQPAVK	R	L	248	272	25	3	2C(57.0215),6S(79.9663)	sp|Q9UFC0|LRWD1_HUMAN	Q9UFC0	LRWD1_HUMAN	LRWD1	Leucine-rich repeat and WD repeat-containing protein 1			2	4.2039408E7	MS/MS	STY:79.9663@ACAS(0.0219)PS(0.7740)AQVEGS(0.0436)PVAGS(0.0292)DGS(0.1313)QPAVK;
ACASPSAQVEGSPVAGSDGSQPAVK	AC[57.0215]ASPS[79.9663]AQVEGSPVAGSDGS[79.9663]QPAVK	R	L	248	272	25	3	20S(79.9663),2C(57.0215),6S(79.9663)	sp|Q9UFC0|LRWD1_HUMAN	Q9UFC0	LRWD1_HUMAN	LRWD1	Leucine-rich repeat and WD repeat-containing protein 1			1	5.3979632E7	MS/MS	STY:79.9663@ACAS(0.0309)PS(0.7681)AQVEGS(0.4302)PVAGS(0.0316)DGS(0.7391)QPAVK;
ACASPSAQVEGSPVAGSDGSQPAVK	AC[57.0215]AS[79.9663]PSAQVEGSPVAGSDGSQPAVK	R	L	248	272	25	3	2C(57.0215),4S(79.9663)	sp|Q9UFC0|LRWD1_HUMAN	Q9UFC0	LRWD1_HUMAN	LRWD1	Leucine-rich repeat and WD repeat-containing protein 1			2	4.2039408E7	MS/MS	STY:79.9663@ACAS(0.4496)PS(0.4496)AQVEGS(0.0112)PVAGS(0.0104)DGS(0.0792)QPAVK;
ADALQAGASQFETSAAK	ADALQAGASQFET[79.9663]SAAK	R	L	50	66	17	2	13T(79.9663)	sp|Q15836|VAMP3_HUMAN	Q15836	VAMP3_HUMAN	VAMP3	Vesicle-associated membrane protein 3	VAMP2	sp|P63027|VAMP2_HUMAN	1	1.2824247E7	MS/MS	STY:79.9663@ADALQAGAS(0.1555)QFET(0.4223)S(0.4223)AAK;
ADAPDAGAQSDSELPSYHQNDVSLDR	ADAPDAGAQSDSELPSYHQNDVS[79.9663]LDR	R	G	1289	1314	26	3	23S(79.9663)	sp|Q92538-3|GBF1_HUMAN	Q92538-3	GBF1_HUMAN	GBF1	Isoform 3 of Golgi-specific brefeldin A-resistance guanine nucleotide exchange factor 1		sp|Q92538-2|GBF1_HUMAN, sp|Q92538|GBF1_HUMAN	2	4.18549504E8	MS/MS	STY:79.9663@ADAPDAGAQS(0.0428)DS(0.0428)ELPS(0.0255)Y(0.0255)HQNDVS(0.8633)LDR;
ADAPDAGAQSDSELPSYHQNDVSLDR	ADAPDAGAQSDS[79.9663]ELPSYHQNDVSLDR	R	G	1289	1314	26	3	12S(79.9663)	sp|Q92538-3|GBF1_HUMAN	Q92538-3	GBF1_HUMAN	GBF1	Isoform 3 of Golgi-specific brefeldin A-resistance guanine nucleotide exchange factor 1		sp|Q92538-2|GBF1_HUMAN, sp|Q92538|GBF1_HUMAN	3	4.18549504E8	MS/MS	STY:79.9663@ADAPDAGAQS(0.0162)DS(0.9276)ELPS(0.0175)Y(0.0181)HQNDVS(0.0206)LDR;
ADAPDAGAQSDSELPSYHQNDVSLDR	ADAPDAGAQS[79.9663]DSELPSYHQNDVSLDR	R	G	1289	1314	26	3	10S(79.9663)	sp|Q92538-3|GBF1_HUMAN	Q92538-3	GBF1_HUMAN	GBF1	Isoform 3 of Golgi-specific brefeldin A-resistance guanine nucleotide exchange factor 1		sp|Q92538-2|GBF1_HUMAN, sp|Q92538|GBF1_HUMAN	7	4.54197696E8	MS/MS	STY:79.9663@ADAPDAGAQS(0.9214)DS(0.0216)ELPS(0.0247)Y(0.0166)HQNDVS(0.0158)LDR;
ADAPDAGAQSDSELPSYHQNDVSLDR	ADAPDAGAQS[79.9663]DS[79.9663]ELPSYHQNDVSLDR	R	G	1289	1314	26	3	10S(79.9663),12S(79.9663)	sp|Q92538-3|GBF1_HUMAN	Q92538-3	GBF1_HUMAN	GBF1	Isoform 3 of Golgi-specific brefeldin A-resistance guanine nucleotide exchange factor 1		sp|Q92538-2|GBF1_HUMAN, sp|Q92538|GBF1_HUMAN	1	0	MS/MS	STY:79.9663@ADAPDAGAQS(0.7346)DS(0.7332)ELPS(0.1545)Y(0.1545)HQNDVS(0.2231)LDR;
ADDADEFGYSR	ADDADEFGY[79.9663]SR	R	-	900	910	11	2	9Y(79.9663)	sp|Q7KZF4|SND1_HUMAN	Q7KZF4	SND1_HUMAN	SND1	Staphylococcal nuclease domain-containing protein 1			1	7865491	MS/MS	STY:79.9663@ADDADEFGY(0.5000)S(0.5000)R;
ADDFPVRDDPSDVTDEDEGPAEPPPPPK	ADDFPVRDDPS[79.9663]DVT[79.9663]DEDEGPAEPPPPPK	R	L	587	614	28	3,4	11S(79.9663),14T(79.9663)	sp|Q3YEC7-2|RABL6_HUMAN	Q3YEC7-2	RABL6_HUMAN	RABL6	Isoform 2 of Rab-like protein 6		sp|Q3YEC7|RABL6_HUMAN	24	1.05936218E9	MS/MS	STY:79.9663@ADDFPVRDDPS(1.0000)DVT(1.0000)DEDEGPAEPPPPPK;
ADEASELACPTPK	ADEASELAC[57.0215]PT[79.9663]PK	K	E	2194	2206	13	2	11T(79.9663),9C(57.0215)	sp|P49327|FAS_HUMAN	P49327	FAS_HUMAN	FASN	Fatty acid synthase			4	5.5256044E7	MS/MS	STY:79.9663@ADEAS(0.0530)ELACPT(0.9470)PK;
ADEASELACPTPK	ADEAS[79.9663]ELAC[57.0215]PTPK	K	E	2194	2206	13	2	5S(79.9663),9C(57.0215)	sp|P49327|FAS_HUMAN	P49327	FAS_HUMAN	FASN	Fatty acid synthase			1	5.5256044E7	MS/MS	STY:79.9663@ADEAS(0.6717)ELACPT(0.3283)PK;
ADEPSSEESDLEIDK	ADEPSSEES[79.9663]DLEIDK	K	E	71	85	15	2	9S(79.9663)	sp|P50502|F10A1_HUMAN	P50502	F10A1_HUMAN	ST13	Hsc70-interacting protein	ST13P4	sp|Q8IZP2|ST134_HUMAN	5	2.35512032E8	MS/MS	STY:79.9663@ADEPS(0.0278)S(0.0278)EES(0.9443)DLEIDK;
ADEPSSEESDLEIDK	ADEPSS[79.9663]EESDLEIDK	K	E	71	85	15	2	6S(79.9663)	sp|P50502|F10A1_HUMAN	P50502	F10A1_HUMAN	ST13	Hsc70-interacting protein	ST13P4	sp|Q8IZP2|ST134_HUMAN	4	4.5932648E7	MS/MS	STY:79.9663@ADEPS(0.0355)S(0.9372)EES(0.0273)DLEIDK;
ADEPSSEESDLEIDK	ADEPSS[79.9663]EES[79.9663]DLEIDK	K	E	71	85	15	2	6S(79.9663),9S(79.9663)	sp|P50502|F10A1_HUMAN	P50502	F10A1_HUMAN	ST13	Hsc70-interacting protein	ST13P4	sp|Q8IZP2|ST134_HUMAN	14	7.6929014E9	MS/MS	STY:79.9663@ADEPS(0.1023)S(0.9488)EES(0.9488)DLEIDK;
ADEPSSEESDLEIDK	ADEPS[79.9663]SEESDLEIDK	K	E	71	85	15	2	5S(79.9663)	sp|P50502|F10A1_HUMAN	P50502	F10A1_HUMAN	ST13	Hsc70-interacting protein	ST13P4	sp|Q8IZP2|ST134_HUMAN	8	2.23255712E8	MS/MS	STY:79.9663@ADEPS(0.4908)S(0.4908)EES(0.0184)DLEIDK;
ADEPSSEESDLEIDK	ADEPS[79.9663]SEES[79.9663]DLEIDK	K	E	71	85	15	2	5S(79.9663),9S(79.9663)	sp|P50502|F10A1_HUMAN	P50502	F10A1_HUMAN	ST13	Hsc70-interacting protein	ST13P4	sp|Q8IZP2|ST134_HUMAN	23	7.6929014E9	MS/MS	STY:79.9663@ADEPS(0.9467)S(0.1065)EES(0.9468)DLEIDK;
ADEPSSEESDLEIDK	ADEPS[79.9663]S[79.9663]EESDLEIDK	K	E	71	85	15	2	5S(79.9663),6S(79.9663)	sp|P50502|F10A1_HUMAN	P50502	F10A1_HUMAN	ST13	Hsc70-interacting protein	ST13P4	sp|Q8IZP2|ST134_HUMAN	20	8.1430323E8	MS/MS	STY:79.9663@ADEPS(0.9494)S(0.9494)EES(0.1013)DLEIDK;
ADEPSSEESDLEIDK	ADEPS[79.9663]S[79.9663]EES[79.9663]DLEIDK	K	E	71	85	15	2	5S(79.9663),6S(79.9663),9S(79.9663)	sp|P50502|F10A1_HUMAN	P50502	F10A1_HUMAN	ST13	Hsc70-interacting protein	ST13P4	sp|Q8IZP2|ST134_HUMAN	163	1.1900073E10	MS/MS	STY:79.9663@ADEPS(1.0000)S(1.0000)EES(1.0000)DLEIDK;
ADGEDAGAESNEEAPGEPSAGSSEEAPGEPSAGSSEEAPGER	ADGEDAGAESNEEAPGEPSAGS[79.9663]S[79.9663]EEAPGEPSAGSSEEAPGER	K	S	94	135	42	3	22S(79.9663),23S(79.9663)	sp|Q8N8A6|DDX51_HUMAN	Q8N8A6	DDX51_HUMAN	DDX51	ATP-dependent RNA helicase DDX51			1	0	MS/MS	STY:79.9663@ADGEDAGAES(0.0285)NEEAPGEPS(0.0926)AGS(0.4734)S(0.4734)EEAPGEPS(0.3107)AGS(0.3107)S(0.3107)EEAPGER;
ADGEDAGAESNEEAPGEPSAGSSEEAPGEPSAGSSEEAPGER	ADGEDAGAESNEEAPGEPS[79.9663]AGS[79.9663]SEEAPGEPSAGSSEEAPGER	K	S	94	135	42	3	19S(79.9663),22S(79.9663)	sp|Q8N8A6|DDX51_HUMAN	Q8N8A6	DDX51_HUMAN	DDX51	ATP-dependent RNA helicase DDX51			1	0	MS/MS	STY:79.9663@ADGEDAGAES(0.0316)NEEAPGEPS(0.3281)AGS(0.3281)S(0.3281)EEAPGEPS(0.3281)AGS(0.3281)S(0.3281)EEAPGER;
ADGEDAGAESNEEAPGEPSAGSSEEAPGEPSAGSSEEAPGER	ADGEDAGAES[79.9663]NEEAPGEPSAGSSEEAPGEPSAGSSEEAPGER	K	S	94	135	42	3,4	10S(79.9663)	sp|Q8N8A6|DDX51_HUMAN	Q8N8A6	DDX51_HUMAN	DDX51	ATP-dependent RNA helicase DDX51			4	5.5633136E7	MS/MS	STY:79.9663@ADGEDAGAES(0.9101)NEEAPGEPS(0.0124)AGS(0.0124)S(0.0124)EEAPGEPS(0.0177)AGS(0.0175)S(0.0175)EEAPGER;
ADGGTGDSSPSPGSSLPSPLSDPR	ADGGTGDSSPSPGS[79.9663]S[79.9663]LPSPLSDPR	R	R	598	621	24	3	14S(79.9663),15S(79.9663)	sp|Q8TD16-2|BICD2_HUMAN	Q8TD16-2	BICD2_HUMAN	BICD2	Isoform 2 of Protein bicaudal D homolog 2		sp|Q8TD16|BICD2_HUMAN	1	8644386	MS/MS	STY:79.9663@ADGGT(0.0343)GDS(0.0390)S(0.0390)PS(0.0390)PGS(0.7938)S(0.7938)LPS(0.1306)PLS(0.1306)DPR;
ADGYEPPVQESV	ADGYEPPVQES[79.9663]V	R	-	253	264	12	2	11S(79.9663)	sp|P61247|RS3A_HUMAN	P61247	RS3A_HUMAN	RPS3A	Small ribosomal subunit protein eS1			3	5.619012E7	MS/MS	STY:79.9663@ADGY(0.1100)EPPVQES(0.8900)V;
ADIDVSGPK	ADIDVS[79.9663]GPK	K	V	1281	1289	9	2	6S(79.9663)	sp|Q09666|AHNK_HUMAN	Q09666	AHNK_HUMAN	AHNAK	Neuroblast differentiation-associated protein AHNAK			6	5.3708364E7	MS/MS	STY:79.9663@ADIDVS(1.0000)GPK;
ADLESPQR	ADLES[79.9663]PQR	R	K	158	165	8	2	5S(79.9663)	sp|Q9Y2Y9|KLF13_HUMAN	Q9Y2Y9	KLF13_HUMAN	KLF13	Krueppel-like factor 13			2	1.7781224E7	MS/MS	STY:79.9663@ADLES(1.0000)PQR;
ADLNQGIGEPQSPSR	ADLNQGIGEPQSPS[79.9663]R	R	R	63	77	15	2	14S(79.9663)	sp|Q96C19|EFHD2_HUMAN	Q96C19	EFHD2_HUMAN	EFHD2	EF-hand domain-containing protein D2			2	0	MS/MS	STY:79.9663@ADLNQGIGEPQS(0.0813)PS(0.9187)R;
ADSGPTQPPLSLSPAPETK	ADSGPTQPPLSLSPAPET[79.9663]K	R	R	2071	2089	19	2	18T(79.9663)	sp|O15027-5|SC16A_HUMAN	O15027-5	SC16A_HUMAN	SEC16A	Isoform 5 of Protein transport protein Sec16A		sp|O15027-2|SC16A_HUMAN, sp|O15027-3|SC16A_HUMAN, sp|O15027-4|SC16A_HUMAN, sp|O15027|SC16A_HUMAN	2	6.6258856E7	MS/MS	STY:79.9663@ADS(0.0837)GPT(0.1154)QPPLS(0.0117)LS(0.0117)PAPET(0.7776)K;
ADSGPTQPPLSLSPAPETK	ADSGPTQPPLSLS[79.9663]PAPETK	R	R	2071	2089	19	2	13S(79.9663)	sp|O15027-5|SC16A_HUMAN	O15027-5	SC16A_HUMAN	SEC16A	Isoform 5 of Protein transport protein Sec16A		sp|O15027-2|SC16A_HUMAN, sp|O15027-3|SC16A_HUMAN, sp|O15027-4|SC16A_HUMAN, sp|O15027|SC16A_HUMAN	1	0	MS/MS	STY:79.9663@ADS(0.0346)GPT(0.0431)QPPLS(0.3626)LS(0.4720)PAPET(0.0876)K;
ADSGPTQPPLSLSPAPETK	ADSGPTQPPLS[79.9663]LSPAPETK	R	R	2071	2089	19	2	11S(79.9663)	sp|O15027-5|SC16A_HUMAN	O15027-5	SC16A_HUMAN	SEC16A	Isoform 5 of Protein transport protein Sec16A		sp|O15027-2|SC16A_HUMAN, sp|O15027-3|SC16A_HUMAN, sp|O15027-4|SC16A_HUMAN, sp|O15027|SC16A_HUMAN	1	0	MS/MS	STY:79.9663@ADS(0.0203)GPT(0.0213)QPPLS(0.8889)LS(0.0347)PAPET(0.0347)K;
ADSGPTQPPLSLSPAPETK	ADSGPT[79.9663]QPPLSLSPAPETK	R	R	2071	2089	19	2	6T(79.9663)	sp|O15027-5|SC16A_HUMAN	O15027-5	SC16A_HUMAN	SEC16A	Isoform 5 of Protein transport protein Sec16A		sp|O15027-2|SC16A_HUMAN, sp|O15027-3|SC16A_HUMAN, sp|O15027-4|SC16A_HUMAN, sp|O15027|SC16A_HUMAN	1	6.6258856E7	MS/MS	STY:79.9663@ADS(0.0186)GPT(0.9332)QPPLS(0.0170)LS(0.0170)PAPET(0.0141)K;
ADSDGAKPEPVAMAR	ADS[79.9663]DGAKPEPVAMAR	K	S	238	252	15	2	3S(79.9663)	sp|Q7Z4V5-3|HDGR2_HUMAN	Q7Z4V5-3	HDGR2_HUMAN	HDGFL2	Isoform 3 of Hepatoma-derived growth factor-related protein 2		sp|Q7Z4V5-2|HDGR2_HUMAN, sp|Q7Z4V5-4|HDGR2_HUMAN, sp|Q7Z4V5|HDGR2_HUMAN	4	4.4981428E7	MS/MS	STY:79.9663@ADS(1.0000)DGAKPEPVAMAR;
ADSDGAKPEPVAMAR	ADS[79.9663]DGAKPEPVAM[15.9949]AR	K	S	238	252	15	2	13M(15.9949),3S(79.9663)	sp|Q7Z4V5-3|HDGR2_HUMAN	Q7Z4V5-3	HDGR2_HUMAN	HDGFL2	Isoform 3 of Hepatoma-derived growth factor-related protein 2		sp|Q7Z4V5-2|HDGR2_HUMAN, sp|Q7Z4V5-4|HDGR2_HUMAN, sp|Q7Z4V5|HDGR2_HUMAN	1	2.326749E7	MS/MS	M:15.9949@ADSDGAKPEPVAM(1.0000)AR;STY:79.9663@ADS(1.0000)DGAKPEPVAMAR;
ADSEASSGPVTEDK	ADS[79.9663]EAS[79.9663]S[79.9663]GPVTEDK	K	S	791	804	14	2	3S(79.9663),6S(79.9663),7S(79.9663)	sp|Q7Z6B7-2|SRGP1_HUMAN	Q7Z6B7-2	SRGP1_HUMAN	SRGAP1	Isoform 2 of SLIT-ROBO Rho GTPase-activating protein 1		sp|Q7Z6B7|SRGP1_HUMAN	2	8774952	MS/MS	STY:79.9663@ADS(0.9337)EAS(0.9337)S(0.9337)GPVT(0.1988)EDK;
ADTSQEICSPR	ADTSQEIC[57.0215]S[79.9663]PR	K	L	1003	1013	11	2	8C(57.0215),9S(79.9663)	sp|P52948-2|NUP98_HUMAN	P52948-2	NUP98_HUMAN	NUP98	Isoform 2 of Nuclear pore complex protein Nup98-Nup96		sp|P52948-5|NUP98_HUMAN, sp|P52948-6|NUP98_HUMAN, sp|P52948|NUP98_HUMAN	1	1.3720147E7	MS/MS	STY:79.9663@ADT(0.1614)S(0.1614)QEICS(0.6772)PR;
ADTTTPTPTAILAPGSPASPPGSLEPK	ADTTTPTPTAILAPGS[79.9663]PASPPGS[79.9663]LEPK	K	A	283	309	27	3	16S(79.9663),23S(79.9663)	sp|P25440-2|BRD2_HUMAN	P25440-2	BRD2_HUMAN	BRD2	Isoform 2 of Bromodomain-containing protein 2		sp|P25440-3|BRD2_HUMAN, sp|P25440-4|BRD2_HUMAN, sp|P25440|BRD2_HUMAN	1	1.70668912E8	MS/MS	STY:79.9663@ADT(0.0344)T(0.0344)T(0.0344)PT(0.0366)PT(0.0366)AILAPGS(0.7288)PAS(0.4868)PPGS(0.6081)LEPK;
ADTTTPTPTAILAPGSPASPPGSLEPK	ADTTTPTPTAILAPGS[79.9663]PAS[79.9663]PPGSLEPK	K	A	283	309	27	3	16S(79.9663),19S(79.9663)	sp|P25440-2|BRD2_HUMAN	P25440-2	BRD2_HUMAN	BRD2	Isoform 2 of Bromodomain-containing protein 2		sp|P25440-3|BRD2_HUMAN, sp|P25440-4|BRD2_HUMAN, sp|P25440|BRD2_HUMAN	2	1.70668912E8	MS/MS	STY:79.9663@ADT(0.0187)T(0.0187)T(0.0187)PT(0.0187)PT(0.0187)AILAPGS(0.9270)PAS(0.9580)PPGS(0.0215)LEPK;
ADTTTPTPTAILAPGSPASPPGSLEPK	ADTTTPTPT[79.9663]AILAPGS[79.9663]PASPPGSLEPK	K	A	283	309	27	3	16S(79.9663),9T(79.9663)	sp|P25440-2|BRD2_HUMAN	P25440-2	BRD2_HUMAN	BRD2	Isoform 2 of Bromodomain-containing protein 2		sp|P25440-3|BRD2_HUMAN, sp|P25440-4|BRD2_HUMAN, sp|P25440|BRD2_HUMAN	1	0	MS/MS	STY:79.9663@ADT(0.0248)T(0.0248)T(0.0248)PT(0.0184)PT(0.8102)AILAPGS(0.8107)PAS(0.1293)PPGS(0.1571)LEPK;
ADTTTPTPTAILAPGSPASPPGSLEPK	ADT[79.9663]TTPTPT[79.9663]AILAPGSPASPPGSLEPK	K	A	283	309	27	3	3T(79.9663),9T(79.9663)	sp|P25440-2|BRD2_HUMAN	P25440-2	BRD2_HUMAN	BRD2	Isoform 2 of Bromodomain-containing protein 2		sp|P25440-3|BRD2_HUMAN, sp|P25440-4|BRD2_HUMAN, sp|P25440|BRD2_HUMAN	1	1.70668912E8	MS/MS	STY:79.9663@ADT(0.2980)T(0.2980)T(0.0091)PT(0.2445)PT(0.3941)AILAPGS(0.2312)PAS(0.2625)PPGS(0.2625)LEPK;
ADVLEAHEAEAEEPEAGKSEAEDDEDEVDDLPSSR	ADVLEAHEAEAEEPEAGKS[79.9663]EAEDDEDEVDDLPSSR	K	R	529	563	35	3	19S(79.9663)	sp|Q8IVT5-2|KSR1_HUMAN	Q8IVT5-2	KSR1_HUMAN	KSR1	Isoform 2 of Kinase suppressor of Ras 1		sp|Q8IVT5-3|KSR1_HUMAN, sp|Q8IVT5-4|KSR1_HUMAN, sp|Q8IVT5|KSR1_HUMAN	2	1.5486431E7	MS/MS	STY:79.9663@ADVLEAHEAEAEEPEAGKS(0.8993)EAEDDEDEVDDLPS(0.0503)S(0.0503)R;
ADVQLFMDDDSYSHHSGLEYADPEK	ADVQLFMDDDSYSHHS[79.9663]GLEY[79.9663]ADPEK	K	F	8	32	25	3	16S(79.9663),20Y(79.9663)	sp|P51636-3|CAV2_HUMAN	P51636-3	CAV2_HUMAN	CAV2	Isoform C of Caveolin-2		sp|P51636|CAV2_HUMAN	1	2.37436512E8	MS/MS	STY:79.9663@ADVQLFMDDDS(0.1193)Y(0.4409)S(0.4409)HHS(0.4723)GLEY(0.5266)ADPEK;
ADVQLFMDDDSYSHHSGLEYADPEK	ADVQLFMDDDSYS[79.9663]HHSGLEY[79.9663]ADPEK	K	F	8	32	25	3	13S(79.9663),20Y(79.9663)	sp|P51636-3|CAV2_HUMAN	P51636-3	CAV2_HUMAN	CAV2	Isoform C of Caveolin-2		sp|P51636|CAV2_HUMAN	1	2.37436512E8	MS/MS	STY:79.9663@ADVQLFMDDDS(0.3765)Y(0.0316)S(0.6166)HHS(0.3326)GLEY(0.6427)ADPEK;
ADVQLFMDDDSYSHHSGLEYADPEK	ADVQLFMDDDSY[79.9663]SHHSGLEY[79.9663]ADPEK	K	F	8	32	25	3	12Y(79.9663),20Y(79.9663)	sp|P51636-3|CAV2_HUMAN	P51636-3	CAV2_HUMAN	CAV2	Isoform C of Caveolin-2		sp|P51636|CAV2_HUMAN	1	2.37436512E8	MS/MS	STY:79.9663@ADVQLFMDDDS(0.1208)Y(0.4764)S(0.4764)HHS(0.4144)GLEY(0.5120)ADPEK;
ADVQLFMDDDSYSHHSGLEYADPEK	ADVQLFMDDDSY[79.9663]SHHS[79.9663]GLEYADPEK	K	F	8	32	25	3	12Y(79.9663),16S(79.9663)	sp|P51636-3|CAV2_HUMAN	P51636-3	CAV2_HUMAN	CAV2	Isoform C of Caveolin-2		sp|P51636|CAV2_HUMAN	1	0	MS/MS	STY:79.9663@ADVQLFMDDDS(0.0428)Y(0.6103)S(0.6103)HHS(0.7087)GLEY(0.0280)ADPEK;
ADVQLFMDDDSYSHHSGLEYADPEK	ADVQLFMDDDSY[79.9663]S[79.9663]HHSGLEYADPEK	K	F	8	32	25	3	12Y(79.9663),13S(79.9663)	sp|P51636-3|CAV2_HUMAN	P51636-3	CAV2_HUMAN	CAV2	Isoform C of Caveolin-2		sp|P51636|CAV2_HUMAN	1	0	MS/MS	STY:79.9663@ADVQLFMDDDS(0.0673)Y(0.6323)S(0.6323)HHS(0.3397)GLEY(0.3283)ADPEK;
ADVTLSALNDSDANSDVVDIEGLGETPPAK	ADVTLSALNDS[79.9663]DANSDVVDIEGLGET[79.9663]PPAK	K	K	102	131	30	3	11S(79.9663),26T(79.9663)	sp|Q8IXM2-2|BAP18_HUMAN	Q8IXM2-2	BAP18_HUMAN	BAP18	Isoform 2 of Chromatin complexes subunit BAP18		sp|Q8IXM2-3|BAP18_HUMAN, sp|Q8IXM2|BAP18_HUMAN	1	0	MS/MS	STY:79.9663@ADVT(0.1062)LS(0.1224)ALNDS(0.6358)DANS(0.5479)DVVDIEGLGET(0.5877)PPAK;
AEAAAAPTVAPGPAQPGHVSPTPATTSPGEK	AEAAAAPT[79.9663]VAPGPAQPGHVSPTPAT[79.9663]TSPGEK	K	G	244	274	31	3	25T(79.9663),8T(79.9663)	sp|Q9Y6R0|NUMBL_HUMAN	Q9Y6R0	NUMBL_HUMAN	NUMBL	Numb-like protein			1	0	MS/MS	STY:79.9663@AEAAAAPT(0.5575)VAPGPAQPGHVS(0.0184)PT(0.0184)PAT(0.4686)T(0.4686)S(0.4686)PGEK;
AEAEAGSPRPDPR	AEAEAGS[79.9663]PRPDPR	R	E	2502	2514	13	2	7S(79.9663)	sp|P58107|EPIPL_HUMAN	P58107	EPIPL_HUMAN	EPPK1	Epiplakin			1	4.4027528E7	MS/MS	STY:79.9663@AEAEAGS(1.0000)PRPDPR;
AEAGAGSATEFQFR	AEAGAGSAT[79.9663]EFQFR	K	G	140	153	14	2	9T(79.9663)	sp|P46783|RS10_HUMAN	P46783	RS10_HUMAN	RPS10	Small ribosomal subunit protein eS10	RPS10P5	sp|Q9NQ39|RS10L_HUMAN	1	0	MS/MS	STY:79.9663@AEAGAGS(0.0659)AT(0.9341)EFQFR;
AEAPAGPALGLPSPEAESGVDR	AEAPAGPALGLPSPEAES[79.9663]GVDR	K	G	13	34	22	2,3	18S(79.9663)	sp|Q53F19|NCBP3_HUMAN	Q53F19	NCBP3_HUMAN	NCBP3	Nuclear cap-binding protein subunit 3			3	4.1188392E7	MS/MS	STY:79.9663@AEAPAGPALGLPS(0.1128)PEAES(0.8872)GVDR;
AEAPAGPALGLPSPEAESGVDR	AEAPAGPALGLPS[79.9663]PEAESGVDR	K	G	13	34	22	2,3	13S(79.9663)	sp|Q53F19|NCBP3_HUMAN	Q53F19	NCBP3_HUMAN	NCBP3	Nuclear cap-binding protein subunit 3			5	8.0419808E7	MS/MS	STY:79.9663@AEAPAGPALGLPS(0.9468)PEAES(0.0532)GVDR;
AEAPLPSPK	AEAPLPS[79.9663]PK	K	L	5104	5112	9	2	7S(79.9663)	sp|Q09666|AHNK_HUMAN	Q09666	AHNK_HUMAN	AHNAK	Neuroblast differentiation-associated protein AHNAK			3	2.185347E7	MS/MS	STY:79.9663@AEAPLPS(1.0000)PK;
AEAPSSPDVAPAGK	AEAPSS[79.9663]PDVAPAGK	K	E	1355	1368	14	2	6S(79.9663)	sp|Q9P1Y6-2|PHRF1_HUMAN	Q9P1Y6-2	PHRF1_HUMAN	PHRF1	Isoform 2 of PHD and RING finger domain-containing protein 1		sp|Q9P1Y6-3|PHRF1_HUMAN, sp|Q9P1Y6|PHRF1_HUMAN	1	2.3967102E7	MS/MS	STY:79.9663@AEAPS(0.0552)S(0.9448)PDVAPAGK;
AEAPSSPDVAPAGK	AEAPS[79.9663]S[79.9663]PDVAPAGK	K	E	1355	1368	14	2	5S(79.9663),6S(79.9663)	sp|Q9P1Y6-2|PHRF1_HUMAN	Q9P1Y6-2	PHRF1_HUMAN	PHRF1	Isoform 2 of PHD and RING finger domain-containing protein 1		sp|Q9P1Y6-3|PHRF1_HUMAN, sp|Q9P1Y6|PHRF1_HUMAN	5	5.5994856E7	MS/MS	STY:79.9663@AEAPS(1.0000)S(1.0000)PDVAPAGK;
AEDEALLSEEDDPIDR	AEDEALLS[79.9663]EEDDPIDR	K	R	1771	1786	16	2	8S(79.9663)	sp|Q04721|NOTC2_HUMAN	Q04721	NOTC2_HUMAN	NOTCH2	Neurogenic locus notch homolog protein 2			1	1.2684213E7	MS/MS	STY:79.9663@AEDEALLS(1.0000)EEDDPIDR;
AEDEECENDGVGGNLLCSYGTPPDSPGNLLSFPR	AEDEEC[57.0215]ENDGVGGNLLC[57.0215]SYGT[79.9663]PPDS[79.9663]PGNLLSFPR	R	F	302	335	34	3	17C(57.0215),21T(79.9663),25S(79.9663),6C(57.0215)	sp|P78356|PI42B_HUMAN	P78356	PI42B_HUMAN	PIP4K2B	Phosphatidylinositol 5-phosphate 4-kinase type-2 beta			1	0	MS/MS	STY:79.9663@AEDEECENDGVGGNLLCS(0.1140)Y(0.1140)GT(0.7416)PPDS(0.7468)PGNLLS(0.2835)FPR;
AEDGATPSPSNETPK	AEDGATPSPSNET[79.9663]PK	K	K	138	152	15	2	13T(79.9663)	sp|P29966|MARCS_HUMAN	P29966	MARCS_HUMAN	MARCKS	Myristoylated alanine-rich C-kinase substrate			7	1.05948493E9	MS/MS	STY:79.9663@AEDGAT(0.0185)PS(0.0185)PS(0.0196)NET(0.9434)PK;
AEDGATPSPSNETPKK	AEDGATPSPSNET[79.9663]PKK	K	K	138	153	16	2	13T(79.9663)	sp|P29966|MARCS_HUMAN	P29966	MARCS_HUMAN	MARCKS	Myristoylated alanine-rich C-kinase substrate			2	1.19202088E8	MS/MS	STY:79.9663@AEDGAT(0.0195)PS(0.0195)PS(0.0203)NET(0.9406)PKK;
AEDGATPSPSNETPK	AEDGATPSPS[79.9663]NETPK	K	K	138	152	15	2	10S(79.9663)	sp|P29966|MARCS_HUMAN	P29966	MARCS_HUMAN	MARCKS	Myristoylated alanine-rich C-kinase substrate			4	4.1653552E8	MS/MS	STY:79.9663@AEDGAT(0.0237)PS(0.0230)PS(0.9340)NET(0.0192)PK;
AEDGATPSPSNETPKK	AEDGATPSPS[79.9663]NETPKK	K	K	138	153	16	2	10S(79.9663)	sp|P29966|MARCS_HUMAN	P29966	MARCS_HUMAN	MARCKS	Myristoylated alanine-rich C-kinase substrate			1	5.620672E7	MS/MS	STY:79.9663@AEDGAT(0.1025)PS(0.0129)PS(0.4423)NET(0.4423)PKK;
AEDGATPSPSNETPK	AEDGATPSPS[79.9663]NET[79.9663]PK	K	K	138	152	15	2	10S(79.9663),13T(79.9663)	sp|P29966|MARCS_HUMAN	P29966	MARCS_HUMAN	MARCKS	Myristoylated alanine-rich C-kinase substrate			1	8.9637176E7	MS/MS	STY:79.9663@AEDGAT(0.0549)PS(0.0709)PS(0.9371)NET(0.9371)PK;
AEDGATPSPSNETPKK	AEDGATPSPS[79.9663]NET[79.9663]PKK	K	K	138	153	16	2	10S(79.9663),13T(79.9663)	sp|P29966|MARCS_HUMAN	P29966	MARCS_HUMAN	MARCKS	Myristoylated alanine-rich C-kinase substrate			1	4.6962504E7	MS/MS	STY:79.9663@AEDGAT(0.0532)PS(0.0584)PS(0.9442)NET(0.9442)PKK;
AEDGATPSPSNETPK	AEDGATPS[79.9663]PSNETPK	K	K	138	152	15	2	8S(79.9663)	sp|P29966|MARCS_HUMAN	P29966	MARCS_HUMAN	MARCKS	Myristoylated alanine-rich C-kinase substrate			5	1.05948493E9	MS/MS	STY:79.9663@AEDGAT(0.0234)PS(0.4820)PS(0.4820)NET(0.0126)PK;
AEDGATPSPSNETPKK	AEDGATPS[79.9663]PSNETPKK	K	K	138	153	16	2	8S(79.9663)	sp|P29966|MARCS_HUMAN	P29966	MARCS_HUMAN	MARCKS	Myristoylated alanine-rich C-kinase substrate			1	5.620672E7	MS/MS	STY:79.9663@AEDGAT(0.0088)PS(0.3304)PS(0.3304)NET(0.3304)PKK;
AEDGATPSPSNETPK	AEDGATPS[79.9663]PS[79.9663]NETPK	K	K	138	152	15	2	10S(79.9663),8S(79.9663)	sp|P29966|MARCS_HUMAN	P29966	MARCS_HUMAN	MARCKS	Myristoylated alanine-rich C-kinase substrate			8	1.8703024E8	MS/MS	STY:79.9663@AEDGAT(0.0522)PS(0.9322)PS(0.9313)NET(0.0844)PK;
AEDGATPSPSNETPKK	AEDGATPS[79.9663]PS[79.9663]NETPKK	K	K	138	153	16	2	10S(79.9663),8S(79.9663)	sp|P29966|MARCS_HUMAN	P29966	MARCS_HUMAN	MARCKS	Myristoylated alanine-rich C-kinase substrate			2	4.6962504E7	MS/MS	STY:79.9663@AEDGAT(0.0532)PS(0.6938)PS(0.6265)NET(0.6265)PKK;
AEDGATPSPSNETPK	AEDGATPS[79.9663]PS[79.9663]NET[79.9663]PK	K	K	138	152	15	2	10S(79.9663),13T(79.9663),8S(79.9663)	sp|P29966|MARCS_HUMAN	P29966	MARCS_HUMAN	MARCKS	Myristoylated alanine-rich C-kinase substrate			1	2.4948996E7	MS/MS	STY:79.9663@AEDGAT(0.3120)PS(0.8958)PS(0.8958)NET(0.8963)PK;
AEDGATPSPSNETPK	AEDGAT[79.9663]PSPSNETPK	K	K	138	152	15	2	6T(79.9663)	sp|P29966|MARCS_HUMAN	P29966	MARCS_HUMAN	MARCKS	Myristoylated alanine-rich C-kinase substrate			5	1.05948493E9	MS/MS	STY:79.9663@AEDGAT(0.9434)PS(0.0189)PS(0.0189)NET(0.0189)PK;
AEDGATPSPSNETPKK	AEDGAT[79.9663]PSPSNETPKK	K	K	138	153	16	2	6T(79.9663)	sp|P29966|MARCS_HUMAN	P29966	MARCS_HUMAN	MARCKS	Myristoylated alanine-rich C-kinase substrate			2	6.2995368E7	MS/MS	STY:79.9663@AEDGAT(0.9360)PS(0.0213)PS(0.0213)NET(0.0213)PKK;
AEDGATPSPSNETPK	AEDGAT[79.9663]PSPSNET[79.9663]PK	K	K	138	152	15	2	13T(79.9663),6T(79.9663)	sp|P29966|MARCS_HUMAN	P29966	MARCS_HUMAN	MARCKS	Myristoylated alanine-rich C-kinase substrate			5	1.8703024E8	MS/MS	STY:79.9663@AEDGAT(0.9443)PS(0.0564)PS(0.0564)NET(0.9429)PK;
AEDGATPSPSNETPK	AEDGAT[79.9663]PSPS[79.9663]NETPK	K	K	138	152	15	2	10S(79.9663),6T(79.9663)	sp|P29966|MARCS_HUMAN	P29966	MARCS_HUMAN	MARCKS	Myristoylated alanine-rich C-kinase substrate			1	6.4204428E7	MS/MS	STY:79.9663@AEDGAT(0.7940)PS(0.3711)PS(0.7831)NET(0.0518)PK;
AEDGATPSPSNETPK	AEDGAT[79.9663]PSPS[79.9663]NET[79.9663]PK	K	K	138	152	15	2	10S(79.9663),13T(79.9663),6T(79.9663)	sp|P29966|MARCS_HUMAN	P29966	MARCS_HUMAN	MARCKS	Myristoylated alanine-rich C-kinase substrate			2	2.4948996E7	MS/MS	STY:79.9663@AEDGAT(0.9478)PS(0.1566)PS(0.9478)NET(0.9478)PK;
AEDGATPSPSNETPK	AEDGAT[79.9663]PS[79.9663]PSNETPK	K	K	138	152	15	2	6T(79.9663),8S(79.9663)	sp|P29966|MARCS_HUMAN	P29966	MARCS_HUMAN	MARCKS	Myristoylated alanine-rich C-kinase substrate			7	1.46729056E8	MS/MS	STY:79.9663@AEDGAT(0.9393)PS(0.9399)PS(0.0604)NET(0.0604)PK;
AEDGATPSPSNETPKK	AEDGAT[79.9663]PS[79.9663]PSNETPKK	K	K	138	153	16	2	6T(79.9663),8S(79.9663)	sp|P29966|MARCS_HUMAN	P29966	MARCS_HUMAN	MARCKS	Myristoylated alanine-rich C-kinase substrate			1	4.6962504E7	MS/MS	STY:79.9663@AEDGAT(0.5000)PS(0.5000)PS(0.5000)NET(0.5000)PKK;
AEDGATPSPSNETPK	AEDGAT[79.9663]PS[79.9663]PS[79.9663]NETPK	K	K	138	152	15	2	10S(79.9663),6T(79.9663),8S(79.9663)	sp|P29966|MARCS_HUMAN	P29966	MARCS_HUMAN	MARCKS	Myristoylated alanine-rich C-kinase substrate			1	2.4948996E7	MS/MS	STY:79.9663@AEDGAT(0.7500)PS(0.7500)PS(0.7500)NET(0.7500)PK;
AEDGSECDPDQEEEEEEEEK	AEDGS[79.9663]EC[57.0215]DPDQEEEEEEEEK	R	G	18	37	20	2	5S(79.9663),7C(57.0215)	sp|A6NFI3|ZN316_HUMAN	A6NFI3	ZN316_HUMAN	ZNF316	Zinc finger protein 316			1	0	MS/MS	STY:79.9663@AEDGS(1.0000)ECDPDQEEEEEEEEK;
AEDLDFWLSTTPPPAPAPAPAPVPSTDECEDAK	AEDLDFWLST[79.9663]TPPPAPAPAPAPVPSTDEC[57.0215]EDAK	K	T	777	809	33	3	10T(79.9663),29C(57.0215)	sp|O14617-2|AP3D1_HUMAN	O14617-2	AP3D1_HUMAN	AP3D1	Isoform 2 of AP-3 complex subunit delta-1			1	0	MS/MS	STY:79.9663@AEDLDFWLS(0.0129)T(0.4420)T(0.4420)PPPAPAPAPAPVPS(0.0611)T(0.0420)DECEDAK;
AEDQTESSCESHR	AEDQT[79.9663]ESSC[57.0215]ESHR	R	K	171	183	13	2	5T(79.9663),9C(57.0215)	sp|Q9BU76|MMTA2_HUMAN	Q9BU76	MMTA2_HUMAN	MMTAG2	Multiple myeloma tumor-associated protein 2			1	0	MS/MS	STY:79.9663@AEDQT(0.2500)ES(0.2500)S(0.2500)CES(0.2500)HR;
AEDSDSEPEPEDNVR	AEDS[79.9663]DSEPEPEDNVR	K	L	420	434	15	2	4S(79.9663)	sp|Q9H0D6-2|XRN2_HUMAN	Q9H0D6-2	XRN2_HUMAN	XRN2	Isoform 2 of 5'-3' exoribonuclease 2		sp|Q9H0D6|XRN2_HUMAN	5	0	MS/MS	STY:79.9663@AEDS(0.5000)DS(0.5000)EPEPEDNVR;
AEDSDSEPEPEDNVR	AEDS[79.9663]DS[79.9663]EPEPEDNVR	K	L	420	434	15	2	4S(79.9663),6S(79.9663)	sp|Q9H0D6-2|XRN2_HUMAN	Q9H0D6-2	XRN2_HUMAN	XRN2	Isoform 2 of 5'-3' exoribonuclease 2		sp|Q9H0D6|XRN2_HUMAN	27	1.35050483E9	MS/MS	STY:79.9663@AEDS(1.0000)DS(1.0000)EPEPEDNVR;
AEEDEILNRSPR	AEEDEILNRS[79.9663]PR	K	N	609	620	12	2	10S(79.9663)	sp|P27824-2|CALX_HUMAN	P27824-2	CALX_HUMAN	CANX	Isoform 2 of Calnexin		sp|P27824-3|CALX_HUMAN, sp|P27824|CALX_HUMAN	29	3.3665088E9	MS/MS	STY:79.9663@AEEDEILNRS(1.0000)PR;
AEEEDLAAVPFLASDNEEEEDEK	AEEEDLAAVPFLAS[79.9663]DNEEEEDEK	R	G	2915	2937	23	3	14S(79.9663)	sp|O95714|HERC2_HUMAN	O95714	HERC2_HUMAN	HERC2	E3 ubiquitin-protein ligase HERC2			1	0	MS/MS	STY:79.9663@AEEEDLAAVPFLAS(1.0000)DNEEEEDEK;
AEEEEASTEEEDK	AEEEEAS[79.9663]T[79.9663]EEEDK	R	E	601	613	13	2	7S(79.9663),8T(79.9663)	sp|Q14160-2|SCRIB_HUMAN	Q14160-2	SCRIB_HUMAN	SCRIB	Isoform 2 of Protein scribble homolog		sp|Q14160-3|SCRIB_HUMAN, sp|Q14160|SCRIB_HUMAN	1	1.9026798E7	MS/MS	STY:79.9663@AEEEEAS(1.0000)T(1.0000)EEEDK;
AEEEHLSSSGGLAK	AEEEHLSS[79.9663]SGGLAK	R	N	349	362	14	2	8S(79.9663)	sp|Q52LW3|RHG29_HUMAN	Q52LW3	RHG29_HUMAN	ARHGAP29	Rho GTPase-activating protein 29		sp|Q52LW3-2|RHG29_HUMAN	2	1.2176989E7	MS/MS	STY:79.9663@AEEEHLS(0.0183)S(0.4909)S(0.4909)GGLAK;
AEENAEGGESALGPDGEPIDESSQMSDLPVK	AEENAEGGESALGPDGEPIDESSQMS[79.9663]DLPVK	K	V	566	596	31	3	26S(79.9663)	sp|P51531-2|SMCA2_HUMAN	P51531-2	SMCA2_HUMAN	SMARCA2	Isoform Short of Probable global transcription activator SNF2L2		sp|P51531|SMCA2_HUMAN	1	4.425414E7	MS/MS	STY:79.9663@AEENAEGGES(0.0333)ALGPDGEPIDES(0.0305)S(0.0305)QMS(0.9058)DLPVK;
AEENAEGGESALGPDGEPIDESSQMSDLPVK	AEENAEGGESALGPDGEPIDES[79.9663]SQMSDLPVK	K	V	566	596	31	3	22S(79.9663)	sp|P51531-2|SMCA2_HUMAN	P51531-2	SMCA2_HUMAN	SMARCA2	Isoform Short of Probable global transcription activator SNF2L2		sp|P51531|SMCA2_HUMAN	2	4.425414E7	MS/MS	STY:79.9663@AEENAEGGES(0.0249)ALGPDGEPIDES(0.3250)S(0.3250)QMS(0.3250)DLPVK;
AEENAEGGESALGPDGEPIDESSQMSDLPVK	AEENAEGGESALGPDGEPIDES[79.9663]SQMS[79.9663]DLPVK	K	V	566	596	31	3	22S(79.9663),26S(79.9663)	sp|P51531-2|SMCA2_HUMAN	P51531-2	SMCA2_HUMAN	SMARCA2	Isoform Short of Probable global transcription activator SNF2L2		sp|P51531|SMCA2_HUMAN	3	6.710944E7	MS/MS	STY:79.9663@AEENAEGGES(0.3301)ALGPDGEPIDES(0.7212)S(0.2326)QMS(0.7161)DLPVK;
AEENAEGGESALGPDGEPIDESSQMSDLPVK	AEENAEGGESALGPDGEPIDES[79.9663]S[79.9663]QMSDLPVK	K	V	566	596	31	3	22S(79.9663),23S(79.9663)	sp|P51531-2|SMCA2_HUMAN	P51531-2	SMCA2_HUMAN	SMARCA2	Isoform Short of Probable global transcription activator SNF2L2		sp|P51531|SMCA2_HUMAN	1	6.710944E7	MS/MS	STY:79.9663@AEENAEGGES(0.4341)ALGPDGEPIDES(0.7364)S(0.7364)QMS(0.0931)DLPVK;
AEENTDQASPQEDYAGFER	AEENTDQAS[79.9663]PQEDYAGFER	K	L	4530	4548	19	2,3	9S(79.9663)	sp|Q9NU22|MDN1_HUMAN	Q9NU22	MDN1_HUMAN	MDN1	Midasin			5	8.7298856E7	MS/MS	STY:79.9663@AEENT(0.0383)DQAS(0.9167)PQEDY(0.0450)AGFER;
AEENTDQASPQEDYAGFER	AEENT[79.9663]DQASPQEDYAGFER	K	L	4530	4548	19	2	5T(79.9663)	sp|Q9NU22|MDN1_HUMAN	Q9NU22	MDN1_HUMAN	MDN1	Midasin			1	6.0588048E7	MS/MS	STY:79.9663@AEENT(0.4865)DQAS(0.4865)PQEDY(0.0269)AGFER;
AEEPPSQLDQDTQVQDMDEGSDDEEEGQK	AEEPPSQLDQDTQVQDMDEGS[79.9663]DDEEEGQK	K	V	339	367	29	3,4	21S(79.9663)	sp|Q15459|SF3A1_HUMAN	Q15459	SF3A1_HUMAN	SF3A1	Splicing factor 3A subunit 1		sp|Q15459-2|SF3A1_HUMAN	51	6.2186245E9	MS/MS	STY:79.9663@AEEPPS(0.0278)QLDQDT(0.0374)QVQDMDEGS(0.9348)DDEEEGQK;
AEEPPSQLDQDTQVQDMDEGSDDEEEGQK	AEEPPSQLDQDTQVQDM[15.9949]DEGS[79.9663]DDEEEGQK	K	V	339	367	29	3,4	17M(15.9949),21S(79.9663)	sp|Q15459|SF3A1_HUMAN	Q15459	SF3A1_HUMAN	SF3A1	Splicing factor 3A subunit 1		sp|Q15459-2|SF3A1_HUMAN	34	1.26639642E9	MS/MS	M:15.9949@AEEPPSQLDQDTQVQDM(1.0000)DEGSDDEEEGQK;STY:79.9663@AEEPPS(0.0274)QLDQDT(0.0279)QVQDMDEGS(0.9447)DDEEEGQK;
AEEPPSQLDQDTQVQDMDEGSDDEEEGQK	AEEPPSQLDQDT[79.9663]QVQDMDEGSDDEEEGQK	K	V	339	367	29	3	12T(79.9663)	sp|Q15459|SF3A1_HUMAN	Q15459	SF3A1_HUMAN	SF3A1	Splicing factor 3A subunit 1		sp|Q15459-2|SF3A1_HUMAN	3	6.9995942E8	MS/MS	STY:79.9663@AEEPPS(0.0556)QLDQDT(0.9148)QVQDMDEGS(0.0296)DDEEEGQK;
AEEPPSQLDQDTQVQDMDEGSDDEEEGQK	AEEPPSQLDQDT[79.9663]QVQDM[15.9949]DEGSDDEEEGQK	K	V	339	367	29	3	12T(79.9663),17M(15.9949)	sp|Q15459|SF3A1_HUMAN	Q15459	SF3A1_HUMAN	SF3A1	Splicing factor 3A subunit 1		sp|Q15459-2|SF3A1_HUMAN	8	1.2466985E9	MS/MS	M:15.9949@AEEPPSQLDQDTQVQDM(1.0000)DEGSDDEEEGQK;STY:79.9663@AEEPPS(0.0755)QLDQDT(0.8565)QVQDMDEGS(0.0680)DDEEEGQK;
AEEPPSQLDQDTQVQDMDEGSDDEEEGQK	AEEPPS[79.9663]QLDQDTQVQDMDEGSDDEEEGQK	K	V	339	367	29	3	6S(79.9663)	sp|Q15459|SF3A1_HUMAN	Q15459	SF3A1_HUMAN	SF3A1	Splicing factor 3A subunit 1		sp|Q15459-2|SF3A1_HUMAN	5	5.463807E9	MS/MS	STY:79.9663@AEEPPS(0.9386)QLDQDT(0.0312)QVQDMDEGS(0.0301)DDEEEGQK;
AEEPPSQLDQDTQVQDMDEGSDDEEEGQK	AEEPPS[79.9663]QLDQDTQVQDM[15.9949]DEGSDDEEEGQK	K	V	339	367	29	3	17M(15.9949),6S(79.9663)	sp|Q15459|SF3A1_HUMAN	Q15459	SF3A1_HUMAN	SF3A1	Splicing factor 3A subunit 1		sp|Q15459-2|SF3A1_HUMAN	6	1.10333069E9	MS/MS	M:15.9949@AEEPPSQLDQDTQVQDM(1.0000)DEGSDDEEEGQK;STY:79.9663@AEEPPS(0.9247)QLDQDT(0.0461)QVQDMDEGS(0.0291)DDEEEGQK;
AEEQQLPPPLSPPSPSTPNHR	AEEQQLPPPLSPPSPS[79.9663]T[79.9663]PNHR	K	R	279	299	21	3	16S(79.9663),17T(79.9663)	sp|Q6WCQ1-2|MPRIP_HUMAN	Q6WCQ1-2	MPRIP_HUMAN	MPRIP	Isoform 2 of Myosin phosphatase Rho-interacting protein		sp|Q6WCQ1-3|MPRIP_HUMAN, sp|Q6WCQ1|MPRIP_HUMAN	4	0	MS/MS	STY:79.9663@AEEQQLPPPLS(0.0552)PPS(0.0553)PS(0.9447)T(0.9447)PNHR;
AEEQQLPPPLSPPSPSTPNHR	AEEQQLPPPLSPPS[79.9663]PSTPNHR	K	R	279	299	21	3	14S(79.9663)	sp|Q6WCQ1-2|MPRIP_HUMAN	Q6WCQ1-2	MPRIP_HUMAN	MPRIP	Isoform 2 of Myosin phosphatase Rho-interacting protein		sp|Q6WCQ1-3|MPRIP_HUMAN, sp|Q6WCQ1|MPRIP_HUMAN	4	0	MS/MS	STY:79.9663@AEEQQLPPPLS(0.0172)PPS(0.8312)PS(0.0203)T(0.1313)PNHR;
AEEQQLPPPLSPPSPSTPNHR	AEEQQLPPPLSPPS[79.9663]PST[79.9663]PNHR	K	R	279	299	21	3	14S(79.9663),17T(79.9663)	sp|Q6WCQ1-2|MPRIP_HUMAN	Q6WCQ1-2	MPRIP_HUMAN	MPRIP	Isoform 2 of Myosin phosphatase Rho-interacting protein		sp|Q6WCQ1-3|MPRIP_HUMAN, sp|Q6WCQ1|MPRIP_HUMAN	2	0	MS/MS	STY:79.9663@AEEQQLPPPLS(0.0592)PPS(0.9173)PS(0.1051)T(0.9184)PNHR;
AEEQQLPPPLSPPSPSTPNHR	AEEQQLPPPLSPPS[79.9663]PS[79.9663]TPNHR	K	R	279	299	21	3	14S(79.9663),16S(79.9663)	sp|Q6WCQ1-2|MPRIP_HUMAN	Q6WCQ1-2	MPRIP_HUMAN	MPRIP	Isoform 2 of Myosin phosphatase Rho-interacting protein		sp|Q6WCQ1-3|MPRIP_HUMAN, sp|Q6WCQ1|MPRIP_HUMAN	1	0	MS/MS	STY:79.9663@AEEQQLPPPLS(0.0489)PPS(0.6504)PS(0.6504)T(0.6504)PNHR;
AEEQQLPPPLSPPSPSTPNHR	AEEQQLPPPLSPPS[79.9663]PS[79.9663]T[79.9663]PNHR	K	R	279	299	21	3	14S(79.9663),16S(79.9663),17T(79.9663)	sp|Q6WCQ1-2|MPRIP_HUMAN	Q6WCQ1-2	MPRIP_HUMAN	MPRIP	Isoform 2 of Myosin phosphatase Rho-interacting protein		sp|Q6WCQ1-3|MPRIP_HUMAN, sp|Q6WCQ1|MPRIP_HUMAN	1	0	MS/MS	STY:79.9663@AEEQQLPPPLS(0.2335)PPS(0.9221)PS(0.9221)T(0.9223)PNHR;
AEEQQLPPPLSPPSPSTPNHR	AEEQQLPPPLS[79.9663]PPSPST[79.9663]PNHR	K	R	279	299	21	3	11S(79.9663),17T(79.9663)	sp|Q6WCQ1-2|MPRIP_HUMAN	Q6WCQ1-2	MPRIP_HUMAN	MPRIP	Isoform 2 of Myosin phosphatase Rho-interacting protein		sp|Q6WCQ1-3|MPRIP_HUMAN, sp|Q6WCQ1|MPRIP_HUMAN	1	0	MS/MS	STY:79.9663@AEEQQLPPPLS(0.9247)PPS(0.0755)PS(0.0755)T(0.9242)PNHR;
AEEQQLPPPLSPPSPSTPNHR	AEEQQLPPPLS[79.9663]PPSPS[79.9663]TPNHR	K	R	279	299	21	3	11S(79.9663),16S(79.9663)	sp|Q6WCQ1-2|MPRIP_HUMAN	Q6WCQ1-2	MPRIP_HUMAN	MPRIP	Isoform 2 of Myosin phosphatase Rho-interacting protein		sp|Q6WCQ1-3|MPRIP_HUMAN, sp|Q6WCQ1|MPRIP_HUMAN	4	0	MS/MS	STY:79.9663@AEEQQLPPPLS(0.9424)PPS(0.0561)PS(0.9466)T(0.0549)PNHR;
AEEQQLPPPLSPPSPSTPNHR	AEEQQLPPPLS[79.9663]PPSPS[79.9663]T[79.9663]PNHR	K	R	279	299	21	3	11S(79.9663),16S(79.9663),17T(79.9663)	sp|Q6WCQ1-2|MPRIP_HUMAN	Q6WCQ1-2	MPRIP_HUMAN	MPRIP	Isoform 2 of Myosin phosphatase Rho-interacting protein		sp|Q6WCQ1-3|MPRIP_HUMAN, sp|Q6WCQ1|MPRIP_HUMAN	2	7.4067136E7	MS/MS	STY:79.9663@AEEQQLPPPLS(0.9400)PPS(0.1802)PS(0.9399)T(0.9399)PNHR;
AEEQQLPPPLSPPSPSTPNHR	AEEQQLPPPLS[79.9663]PPS[79.9663]PSTPNHR	K	R	279	299	21	3	11S(79.9663),14S(79.9663)	sp|Q6WCQ1-2|MPRIP_HUMAN	Q6WCQ1-2	MPRIP_HUMAN	MPRIP	Isoform 2 of Myosin phosphatase Rho-interacting protein		sp|Q6WCQ1-3|MPRIP_HUMAN, sp|Q6WCQ1|MPRIP_HUMAN	14	0	MS/MS	STY:79.9663@AEEQQLPPPLS(0.9463)PPS(0.9467)PS(0.0535)T(0.0535)PNHR;
AEEQQLPPPLSPPSPSTPNHR	AEEQQLPPPLS[79.9663]PPS[79.9663]PS[79.9663]TPNHR	K	R	279	299	21	3	11S(79.9663),14S(79.9663),16S(79.9663)	sp|Q6WCQ1-2|MPRIP_HUMAN	Q6WCQ1-2	MPRIP_HUMAN	MPRIP	Isoform 2 of Myosin phosphatase Rho-interacting protein		sp|Q6WCQ1-3|MPRIP_HUMAN, sp|Q6WCQ1|MPRIP_HUMAN	2	0	MS/MS	STY:79.9663@AEEQQLPPPLS(0.8783)PPS(0.9051)PS(0.9043)T(0.3123)PNHR;
AEFPSSGSNSVLNTPPTTPESPSSVTVTEGSR	AEFPSSGSNSVLNTPPTTPESPSS[79.9663]VTVT[79.9663]EGS[79.9663]R	K	Q	923	954	32	3	24S(79.9663),28T(79.9663),31S(79.9663)	sp|Q4LE39-2|ARI4B_HUMAN	Q4LE39-2	ARI4B_HUMAN	ARID4B	Isoform 2 of AT-rich interactive domain-containing protein 4B		sp|Q4LE39-3|ARI4B_HUMAN, sp|Q4LE39-4|ARI4B_HUMAN, sp|Q4LE39|ARI4B_HUMAN	1	0	MS/MS	STY:79.9663@AEFPS(0.3183)S(0.3183)GS(0.3183)NS(0.2858)VLNT(0.0258)PPT(0.0258)T(0.0258)PES(0.0258)PS(0.0258)S(0.3797)VT(0.3797)VT(0.4256)EGS(0.4452)R;
AEFPSSGSNSVLNTPPTTPESPSSVTVTEGSR	AEFPS[79.9663]SGSNSVLNTPPTTPESPSSVT[79.9663]VT[79.9663]EGSR	K	Q	923	954	32	3	26T(79.9663),28T(79.9663),5S(79.9663)	sp|Q4LE39-2|ARI4B_HUMAN	Q4LE39-2	ARI4B_HUMAN	ARID4B	Isoform 2 of AT-rich interactive domain-containing protein 4B		sp|Q4LE39-3|ARI4B_HUMAN, sp|Q4LE39-4|ARI4B_HUMAN, sp|Q4LE39|ARI4B_HUMAN	1	0	MS/MS	STY:79.9663@AEFPS(0.4113)S(0.4113)GS(0.4113)NS(0.4113)VLNT(0.0375)PPT(0.0375)T(0.0331)PES(0.0162)PS(0.0162)S(0.0162)VT(0.5570)VT(0.5367)EGS(0.1043)R;
AEGAATEEEGTPKESEPQAAAEPAEAK	AEGAATEEEGTPKES[79.9663]EPQAAAEPAEAK	K	E	26	52	27	3	15S(79.9663)	sp|P80723|BASP1_HUMAN	P80723	BASP1_HUMAN	BASP1	Brain acid soluble protein 1		sp|P80723-2|BASP1_HUMAN	1	1.5107902E7	MS/MS	STY:79.9663@AEGAAT(0.4154)EEEGT(0.0418)PKES(0.5428)EPQAAAEPAEAK;
AEGAATEEEGTPK	AEGAATEEEGT[79.9663]PK	K	E	26	38	13	2	11T(79.9663)	sp|P80723|BASP1_HUMAN	P80723	BASP1_HUMAN	BASP1	Brain acid soluble protein 1		sp|P80723-2|BASP1_HUMAN	5	1.57149376E8	MS/MS	STY:79.9663@AEGAAT(0.0530)EEEGT(0.9470)PK;
AEGDEEGPSGASEEEDT	AEGDEEGPSGAS[79.9663]EEEDT[79.9663]	K	-	328	344	17	2	12S(79.9663),17T(79.9663)	sp|Q96DX7|TRI44_HUMAN	Q96DX7	TRI44_HUMAN	TRIM44	Tripartite motif-containing protein 44			1	6.659432E7	MS/MS	STY:79.9663@AEGDEEGPS(0.6508)GAS(0.6701)EEEDT(0.6791);
AEGDEEGPSGASEEEDT	AEGDEEGPS[79.9663]GASEEEDT[79.9663]	K	-	328	344	17	2	17T(79.9663),9S(79.9663)	sp|Q96DX7|TRI44_HUMAN	Q96DX7	TRI44_HUMAN	TRIM44	Tripartite motif-containing protein 44			1	3.8515336E7	MS/MS	STY:79.9663@AEGDEEGPS(0.6555)GAS(0.6555)EEEDT(0.6889);
AEGDEEGPSGASEEEDT	AEGDEEGPS[79.9663]GAS[79.9663]EEEDT	K	-	328	344	17	2	12S(79.9663),9S(79.9663)	sp|Q96DX7|TRI44_HUMAN	Q96DX7	TRI44_HUMAN	TRIM44	Tripartite motif-containing protein 44			2	6.659432E7	MS/MS	STY:79.9663@AEGDEEGPS(0.9458)GAS(0.9458)EEEDT(0.1083);
AEGDSAGTAGTPGGTPAGDK	AEGDSAGT[79.9663]AGTPGGTPAGDK	K	V	186	205	20	2	8T(79.9663)	sp|Q92925-2|SMRD2_HUMAN	Q92925-2	SMRD2_HUMAN	SMARCD2	Isoform 2 of SWI/SNF-related matrix-associated actin-dependent regulator of chromatin subfamily D member 2		sp|Q92925-3|SMRD2_HUMAN, sp|Q92925|SMRD2_HUMAN	1	8.29898e+06	MS/MS	STY:79.9663@AEGDS(0.0295)AGT(0.4077)AGT(0.4077)PGGT(0.1551)PAGDK;
AEGEPQEESPLK	AEGEPQEES[79.9663]PLK	K	S	167	178	12	2	9S(79.9663)	sp|Q9NYF8-2|BCLF1_HUMAN	Q9NYF8-2	BCLF1_HUMAN	BCLAF1	Isoform 2 of Bcl-2-associated transcription factor 1		sp|Q9NYF8-3|BCLF1_HUMAN, sp|Q9NYF8-4|BCLF1_HUMAN, sp|Q9NYF8|BCLF1_HUMAN	16	1.24810202E9	MS/MS	STY:79.9663@AEGEPQEES(1.0000)PLK;
AEGEWEDQEALDYFSDK	AEGEWEDQEALDYFS[79.9663]DK	R	E	369	385	17	2	15S(79.9663)	sp|Q9NYF8-2|BCLF1_HUMAN	Q9NYF8-2	BCLF1_HUMAN	BCLAF1	Isoform 2 of Bcl-2-associated transcription factor 1		sp|Q9NYF8-3|BCLF1_HUMAN, sp|Q9NYF8|BCLF1_HUMAN	1	4.19340064E8	MS/MS	STY:79.9663@AEGEWEDQEALDY(0.0699)FS(0.9301)DK;
AEGEWEDQEALDYFSDKESGK	AEGEWEDQEALDYFS[79.9663]DKES[79.9663]GK	R	Q	369	389	21	3	15S(79.9663),19S(79.9663)	sp|Q9NYF8-2|BCLF1_HUMAN	Q9NYF8-2	BCLF1_HUMAN	BCLAF1	Isoform 2 of Bcl-2-associated transcription factor 1		sp|Q9NYF8-3|BCLF1_HUMAN, sp|Q9NYF8|BCLF1_HUMAN	1	0	MS/MS	STY:79.9663@AEGEWEDQEALDY(0.1033)FS(0.9483)DKES(0.9484)GK;
AEGEWEDQEALDYFSDK	AEGEWEDQEALDY[79.9663]FSDK	R	E	369	385	17	2,3	13Y(79.9663)	sp|Q9NYF8-2|BCLF1_HUMAN	Q9NYF8-2	BCLF1_HUMAN	BCLAF1	Isoform 2 of Bcl-2-associated transcription factor 1		sp|Q9NYF8-3|BCLF1_HUMAN, sp|Q9NYF8|BCLF1_HUMAN	4	4.2418496E8	MS/MS	STY:79.9663@AEGEWEDQEALDY(0.9443)FS(0.0557)DK;
AEGEWEDQEALDYFSDKESGK	AEGEWEDQEALDY[79.9663]FS[79.9663]DKESGK	R	Q	369	389	21	3	13Y(79.9663),15S(79.9663)	sp|Q9NYF8-2|BCLF1_HUMAN	Q9NYF8-2	BCLF1_HUMAN	BCLAF1	Isoform 2 of Bcl-2-associated transcription factor 1		sp|Q9NYF8-3|BCLF1_HUMAN, sp|Q9NYF8|BCLF1_HUMAN	1	1.2110052E8	MS/MS	STY:79.9663@AEGEWEDQEALDY(0.8617)FS(0.8617)DKES(0.2765)GK;
AEGHSDDESDSEGSDSESTSR	AEGHSDDESDSEGSDSES[79.9663]T[79.9663]SR	K	E	234	254	21	2	18S(79.9663),19T(79.9663)	sp|Q9P289-3|STK26_HUMAN	Q9P289-3	STK26_HUMAN	STK26	Isoform 3 of Serine/threonine-protein kinase 26		sp|Q9P289-2|STK26_HUMAN, sp|Q9P289|STK26_HUMAN	1	1.7275312E7	MS/MS	STY:79.9663@AEGHS(0.0692)DDES(0.0692)DS(0.0692)EGS(0.0692)DS(0.0692)ES(0.5513)T(0.5513)S(0.5513)R;
AEGHSDDESDSEGSDSESTSR	AEGHSDDESDSEGSDSES[79.9663]T[79.9663]S[79.9663]R	K	E	234	254	21	2	18S(79.9663),19T(79.9663),20S(79.9663)	sp|Q9P289-3|STK26_HUMAN	Q9P289-3	STK26_HUMAN	STK26	Isoform 3 of Serine/threonine-protein kinase 26		sp|Q9P289-2|STK26_HUMAN, sp|Q9P289|STK26_HUMAN	1	1.8105944E7	MS/MS	STY:79.9663@AEGHS(0.0871)DDES(0.0871)DS(0.0871)EGS(0.0871)DS(0.0871)ES(0.8549)T(0.8549)S(0.8549)R;
AEGHSDDESDSEGSDSESTSR	AEGHSDDES[79.9663]DSEGSDSESTSR	K	E	234	254	21	2	9S(79.9663)	sp|Q9P289-3|STK26_HUMAN	Q9P289-3	STK26_HUMAN	STK26	Isoform 3 of Serine/threonine-protein kinase 26		sp|Q9P289-2|STK26_HUMAN, sp|Q9P289|STK26_HUMAN	1	1.257174E7	MS/MS	STY:79.9663@AEGHS(0.0107)DDES(0.9362)DS(0.0101)EGS(0.0088)DS(0.0085)ES(0.0085)T(0.0085)S(0.0085)R;
AEGHSDDESDSEGSDSESTSR	AEGHS[79.9663]DDESDSEGSDSESTSR	K	E	234	254	21	2	5S(79.9663)	sp|Q9P289-3|STK26_HUMAN	Q9P289-3	STK26_HUMAN	STK26	Isoform 3 of Serine/threonine-protein kinase 26		sp|Q9P289-2|STK26_HUMAN, sp|Q9P289|STK26_HUMAN	2	1.257174E7	MS/MS	STY:79.9663@AEGHS(0.8902)DDES(0.0157)DS(0.0157)EGS(0.0157)DS(0.0157)ES(0.0157)T(0.0157)S(0.0157)R;
AEGHSDDESDSEGSDSESTSR	AEGHS[79.9663]DDESDSEGS[79.9663]DS[79.9663]ESTSR	K	E	234	254	21	3	14S(79.9663),16S(79.9663),5S(79.9663)	sp|Q9P289-3|STK26_HUMAN	Q9P289-3	STK26_HUMAN	STK26	Isoform 3 of Serine/threonine-protein kinase 26		sp|Q9P289-2|STK26_HUMAN, sp|Q9P289|STK26_HUMAN	1	1.960967E7	MS/MS	STY:79.9663@AEGHS(0.5334)DDES(0.0407)DS(0.1581)EGS(0.4536)DS(0.4536)ES(0.4536)T(0.4536)S(0.4536)R;
AEGHSDDESDSEGSDSESTSR	AEGHS[79.9663]DDES[79.9663]DSEGSDSESTSR	K	E	234	254	21	2,3	5S(79.9663),9S(79.9663)	sp|Q9P289-3|STK26_HUMAN	Q9P289-3	STK26_HUMAN	STK26	Isoform 3 of Serine/threonine-protein kinase 26		sp|Q9P289-2|STK26_HUMAN, sp|Q9P289|STK26_HUMAN	2	2.8977976E7	MS/MS	STY:79.9663@AEGHS(0.3884)DDES(0.3884)DS(0.3884)EGS(0.3884)DS(0.3884)ES(0.0120)T(0.0229)S(0.0229)R;
AEGHSDDESDSEGSDSESTSR	AEGHS[79.9663]DDES[79.9663]DS[79.9663]EGSDSESTSR	K	E	234	254	21	3	11S(79.9663),5S(79.9663),9S(79.9663)	sp|Q9P289-3|STK26_HUMAN	Q9P289-3	STK26_HUMAN	STK26	Isoform 3 of Serine/threonine-protein kinase 26		sp|Q9P289-2|STK26_HUMAN, sp|Q9P289|STK26_HUMAN	1	1.960967E7	MS/MS	STY:79.9663@AEGHS(0.9200)DDES(0.9200)DS(0.9200)EGS(0.0497)DS(0.0497)ES(0.0497)T(0.0454)S(0.0454)R;
AEGSPSEGK	AEGS[79.9663]PSEGK	K	K	570	578	9	2	4S(79.9663)	sp|Q9P2E9|RRBP1_HUMAN	Q9P2E9	RRBP1_HUMAN	RRBP1	Ribosome-binding protein 1			1	0	MS/MS	STY:79.9663@AEGS(0.5000)PS(0.5000)EGK;
AELEEMEEVHPSDEEEEDATK	AELEEMEEVHPS[79.9663]DEEEEDATK	K	A	656	676	21	3	12S(79.9663)	sp|P78559-2|MAP1A_HUMAN	P78559-2	MAP1A_HUMAN	MAP1A	Isoform 2 of Microtubule-associated protein 1A		sp|P78559|MAP1A_HUMAN	3	1.696966E7	MS/MS	STY:79.9663@AELEEMEEVHPS(0.8869)DEEEEDAT(0.1131)K;
AENAEGQTPAIGPDGEPLDETSQMSDLPVK	AENAEGQTPAIGPDGEPLDETS[79.9663]QMSDLPVK	K	V	589	618	30	3	22S(79.9663)	sp|P51532-2|SMCA4_HUMAN	P51532-2	SMCA4_HUMAN	SMARCA4	Isoform 2 of Transcription activator BRG1		sp|P51532-3|SMCA4_HUMAN, sp|P51532-4|SMCA4_HUMAN, sp|P51532-5|SMCA4_HUMAN, sp|P51532|SMCA4_HUMAN	2	1.01697384E8	MS/MS	STY:79.9663@AENAEGQT(0.0329)PAIGPDGEPLDET(0.0131)S(0.4770)QMS(0.4770)DLPVK;
AENAEGQTPAIGPDGEPLDETSQMSDLPVK	AENAEGQTPAIGPDGEPLDETS[79.9663]QMS[79.9663]DLPVK	K	V	589	618	30	3	22S(79.9663),25S(79.9663)	sp|P51532-2|SMCA4_HUMAN	P51532-2	SMCA4_HUMAN	SMARCA4	Isoform 2 of Transcription activator BRG1		sp|P51532-3|SMCA4_HUMAN, sp|P51532-4|SMCA4_HUMAN, sp|P51532-5|SMCA4_HUMAN, sp|P51532|SMCA4_HUMAN	1	7.1415472E7	MS/MS	STY:79.9663@AENAEGQT(0.5809)PAIGPDGEPLDET(0.0426)S(0.6841)QMS(0.6924)DLPVK;
AENAEGQTPAIGPDGEPLDETSQMSDLPVK	AENAEGQTPAIGPDGEPLDETS[79.9663]QM[15.9949]S[79.9663]DLPVK	K	V	589	618	30	3	22S(79.9663),24M(15.9949),25S(79.9663)	sp|P51532-2|SMCA4_HUMAN	P51532-2	SMCA4_HUMAN	SMARCA4	Isoform 2 of Transcription activator BRG1		sp|P51532-3|SMCA4_HUMAN, sp|P51532-4|SMCA4_HUMAN, sp|P51532-5|SMCA4_HUMAN, sp|P51532|SMCA4_HUMAN	1	3.8317088E7	MS/MS	M:15.9949@AENAEGQTPAIGPDGEPLDETSQM(1.0000)SDLPVK;STY:79.9663@AENAEGQT(0.1288)PAIGPDGEPLDET(0.0817)S(0.8946)QMS(0.8949)DLPVK;
AENAEGQTPAIGPDGEPLDETSQMSDLPVK	AENAEGQTPAIGPDGEPLDET[79.9663]SQMSDLPVK	K	V	589	618	30	3	21T(79.9663)	sp|P51532-2|SMCA4_HUMAN	P51532-2	SMCA4_HUMAN	SMARCA4	Isoform 2 of Transcription activator BRG1		sp|P51532-3|SMCA4_HUMAN, sp|P51532-4|SMCA4_HUMAN, sp|P51532-5|SMCA4_HUMAN, sp|P51532|SMCA4_HUMAN	3	1.266356E8	MS/MS	STY:79.9663@AENAEGQT(0.1028)PAIGPDGEPLDET(0.4398)S(0.4398)QMS(0.0176)DLPVK;
AENAEGQTPAIGPDGEPLDETSQMSDLPVK	AENAEGQTPAIGPDGEPLDET[79.9663]SQMS[79.9663]DLPVK	K	V	589	618	30	3	21T(79.9663),25S(79.9663)	sp|P51532-2|SMCA4_HUMAN	P51532-2	SMCA4_HUMAN	SMARCA4	Isoform 2 of Transcription activator BRG1		sp|P51532-3|SMCA4_HUMAN, sp|P51532-4|SMCA4_HUMAN, sp|P51532-5|SMCA4_HUMAN, sp|P51532|SMCA4_HUMAN	3	2.42275248E8	MS/MS	STY:79.9663@AENAEGQT(0.4474)PAIGPDGEPLDET(0.7496)S(0.0533)QMS(0.7497)DLPVK;
AENAEGQTPAIGPDGEPLDETSQMSDLPVK	AENAEGQTPAIGPDGEPLDET[79.9663]SQM[15.9949]SDLPVK	K	V	589	618	30	3	21T(79.9663),24M(15.9949)	sp|P51532-2|SMCA4_HUMAN	P51532-2	SMCA4_HUMAN	SMARCA4	Isoform 2 of Transcription activator BRG1		sp|P51532-3|SMCA4_HUMAN, sp|P51532-4|SMCA4_HUMAN, sp|P51532-5|SMCA4_HUMAN, sp|P51532|SMCA4_HUMAN	1	2.2004718E7	MS/MS	M:15.9949@AENAEGQTPAIGPDGEPLDETSQM(1.0000)SDLPVK;STY:79.9663@AENAEGQT(0.2113)PAIGPDGEPLDET(0.7293)S(0.0297)QMS(0.0297)DLPVK;
AENAEGQTPAIGPDGEPLDETSQMSDLPVK	AENAEGQTPAIGPDGEPLDET[79.9663]S[79.9663]QMSDLPVK	K	V	589	618	30	3	21T(79.9663),22S(79.9663)	sp|P51532-2|SMCA4_HUMAN	P51532-2	SMCA4_HUMAN	SMARCA4	Isoform 2 of Transcription activator BRG1		sp|P51532-3|SMCA4_HUMAN, sp|P51532-4|SMCA4_HUMAN, sp|P51532-5|SMCA4_HUMAN, sp|P51532|SMCA4_HUMAN	2	1.70859776E8	MS/MS	STY:79.9663@AENAEGQT(0.1913)PAIGPDGEPLDET(0.8497)S(0.8497)QMS(0.1094)DLPVK;
AENAEGQTPAIGPDGEPLDETSQMSDLPVK	AENAEGQTPAIGPDGEPLDET[79.9663]S[79.9663]QM[15.9949]SDLPVK	K	V	589	618	30	3	21T(79.9663),22S(79.9663),24M(15.9949)	sp|P51532-2|SMCA4_HUMAN	P51532-2	SMCA4_HUMAN	SMARCA4	Isoform 2 of Transcription activator BRG1		sp|P51532-3|SMCA4_HUMAN, sp|P51532-4|SMCA4_HUMAN, sp|P51532-5|SMCA4_HUMAN, sp|P51532|SMCA4_HUMAN	1	3.9617476E7	MS/MS	M:15.9949@AENAEGQTPAIGPDGEPLDETSQM(1.0000)SDLPVK;STY:79.9663@AENAEGQT(0.0445)PAIGPDGEPLDET(0.6518)S(0.6518)QMS(0.6518)DLPVK;
AENAEGQTPAIGPDGEPLDETSQMSDLPVK	AENAEGQT[79.9663]PAIGPDGEPLDETSQMSDLPVK	K	V	589	618	30	3	8T(79.9663)	sp|P51532-2|SMCA4_HUMAN	P51532-2	SMCA4_HUMAN	SMARCA4	Isoform 2 of Transcription activator BRG1		sp|P51532-3|SMCA4_HUMAN, sp|P51532-4|SMCA4_HUMAN, sp|P51532-5|SMCA4_HUMAN, sp|P51532|SMCA4_HUMAN	1	1.01697384E8	MS/MS	STY:79.9663@AENAEGQT(0.2658)PAIGPDGEPLDET(0.2432)S(0.2404)QMS(0.2507)DLPVK;
AENGERSDLEEDNER	AENGERS[79.9663]DLEEDNER	R	E	375	389	15	2,3	7S(79.9663)	sp|Q8WU90|ZC3HF_HUMAN	Q8WU90	ZC3HF_HUMAN	ZC3H15	Zinc finger CCCH domain-containing protein 15			15	1.23249328E8	MS/MS	STY:79.9663@AENGERS(1.0000)DLEEDNER;
AEPASPDSPK	AEPAS[79.9663]PDS[79.9663]PK	K	G	15	24	10	2	5S(79.9663),8S(79.9663)	sp|P11474-2|ERR1_HUMAN	P11474-2	ERR1_HUMAN	ESRRA	Isoform 2 of Steroid hormone receptor ERR1		sp|P11474|ERR1_HUMAN	3	2.0834308E7	MS/MS	STY:79.9663@AEPAS(1.0000)PDS(1.0000)PK;
AEPPKPEVVDSTESIPVSDEDSDAMVDDPNDEDFVPFRPR	AEPPKPEVVDSTESIPVS[79.9663]DEDS[79.9663]DAMVDDPNDEDFVPFRPR	R	R	246	285	40	4	18S(79.9663),22S(79.9663)	sp|Q14202-2|ZMYM3_HUMAN	Q14202-2	ZMYM3_HUMAN	ZMYM3	Isoform 2 of Zinc finger MYM-type protein 3		sp|Q14202-3|ZMYM3_HUMAN, sp|Q14202|ZMYM3_HUMAN	4	1.86657904E8	MS/MS	STY:79.9663@AEPPKPEVVDS(0.0456)T(0.0359)ES(0.0359)IPVS(0.9412)DEDS(0.9414)DAMVDDPNDEDFVPFRPR;
AEPPKPEVVDSTESIPVSDEDSDAMVDDPNDEDFVPFRPR	AEPPKPEVVDSTES[79.9663]IPVS[79.9663]DEDSDAMVDDPNDEDFVPFRPR	R	R	246	285	40	4	14S(79.9663),18S(79.9663)	sp|Q14202-2|ZMYM3_HUMAN	Q14202-2	ZMYM3_HUMAN	ZMYM3	Isoform 2 of Zinc finger MYM-type protein 3		sp|Q14202-3|ZMYM3_HUMAN, sp|Q14202|ZMYM3_HUMAN	1	5.3366024E7	MS/MS	STY:79.9663@AEPPKPEVVDS(0.2029)T(0.2029)ES(0.7907)IPVS(0.7692)DEDS(0.0343)DAMVDDPNDEDFVPFRPR;
AEPPKPEVVDSTESIPVSDEDSDAMVDDPNDEDFVPFR	AEPPKPEVVDS[79.9663]TESIPVSDEDS[79.9663]DAMVDDPNDEDFVPFR	R	P	246	283	38	4	11S(79.9663),22S(79.9663)	sp|Q14202-2|ZMYM3_HUMAN	Q14202-2	ZMYM3_HUMAN	ZMYM3	Isoform 2 of Zinc finger MYM-type protein 3		sp|Q14202-3|ZMYM3_HUMAN, sp|Q14202|ZMYM3_HUMAN	1	1.1479504E7	MS/MS	STY:79.9663@AEPPKPEVVDS(0.4729)T(0.4729)ES(0.4729)IPVS(0.0324)DEDS(0.5488)DAMVDDPNDEDFVPFR;
AEPPKPEVVDSTESIPVSDEDSDAMVDDPNDEDFVPFRPR	AEPPKPEVVDS[79.9663]TESIPVSDEDS[79.9663]DAMVDDPNDEDFVPFRPR	R	R	246	285	40	4	11S(79.9663),22S(79.9663)	sp|Q14202-2|ZMYM3_HUMAN	Q14202-2	ZMYM3_HUMAN	ZMYM3	Isoform 2 of Zinc finger MYM-type protein 3		sp|Q14202-3|ZMYM3_HUMAN, sp|Q14202|ZMYM3_HUMAN	1	1.86657904E8	MS/MS	STY:79.9663@AEPPKPEVVDS(0.5181)T(0.2878)ES(0.3048)IPVS(0.4293)DEDS(0.4600)DAMVDDPNDEDFVPFRPR;
AEPPKPEVVDSTESIPVSDEDSDAMVDDPNDEDFVPFRPR	AEPPKPEVVDS[79.9663]T[79.9663]ESIPVSDEDSDAM[15.9949]VDDPNDEDFVPFRPR	R	R	246	285	40	4	11S(79.9663),12T(79.9663),25M(15.9949)	sp|Q14202-2|ZMYM3_HUMAN	Q14202-2	ZMYM3_HUMAN	ZMYM3	Isoform 2 of Zinc finger MYM-type protein 3		sp|Q14202-3|ZMYM3_HUMAN, sp|Q14202|ZMYM3_HUMAN	1	3.3344264E7	MS/MS	M:15.9949@AEPPKPEVVDSTESIPVSDEDSDAM(1.0000)VDDPNDEDFVPFRPR;STY:79.9663@AEPPKPEVVDS(0.4118)T(0.4118)ES(0.3528)IPVS(0.4118)DEDS(0.4118)DAMVDDPNDEDFVPFRPR;
AEPSEVDMNSPK	AEPSEVDMNS[79.9663]PK	K	S	62	73	12	2	10S(79.9663)	sp|Q9NR30|DDX21_HUMAN	Q9NR30	DDX21_HUMAN	DDX21	Nucleolar RNA helicase 2			7	9.7808928E7	MS/MS	STY:79.9663@AEPS(0.0532)EVDMNS(0.9468)PK;
AEPSEVDMNSPK	AEPS[79.9663]EVDMNSPK	K	S	62	73	12	2	4S(79.9663)	sp|Q9NR30|DDX21_HUMAN	Q9NR30	DDX21_HUMAN	DDX21	Nucleolar RNA helicase 2			1	4.5505604E7	MS/MS	STY:79.9663@AEPS(0.5000)EVDMNS(0.5000)PK;
AEQGSEEEGEGEEEEEEGGESK	AEQGSEEEGEGEEEEEEGGES[79.9663]K	K	A	224	245	22	2,3	21S(79.9663)	sp|Q8NE71|ABCF1_HUMAN	Q8NE71	ABCF1_HUMAN	ABCF1	ATP-binding cassette sub-family F member 1			2	0	MS/MS	STY:79.9663@AEQGS(0.3147)EEEGEGEEEEEEGGES(0.6853)K;
AEQGSEEEGEGEEEEEEGGESK	AEQGS[79.9663]EEEGEGEEEEEEGGESK	K	A	224	245	22	2,3	5S(79.9663)	sp|Q8NE71|ABCF1_HUMAN	Q8NE71	ABCF1_HUMAN	ABCF1	ATP-binding cassette sub-family F member 1			17	9.0234861E8	MS/MS	STY:79.9663@AEQGS(0.9454)EEEGEGEEEEEEGGES(0.0546)K;
AEQLQDAEEEKDDSNEEENKDSLVDDEEEK	AEQLQDAEEEKDDS[79.9663]NEEENKDS[79.9663]LVDDEEEK	R	E	238	267	30	3	14S(79.9663),22S(79.9663)	sp|Q9H1E5|TMX4_HUMAN	Q9H1E5	TMX4_HUMAN	TMX4	Thioredoxin-related transmembrane protein 4			6	7.1397824E7	MS/MS	STY:79.9663@AEQLQDAEEEKDDS(1.0000)NEEENKDS(1.0000)LVDDEEEK;
AEQLVLSGADSDEDTSR	AEQLVLSGADS[79.9663]DEDTSR	K	A	262	278	17	2	11S(79.9663)	sp|O75128-2|COBL_HUMAN	O75128-2	COBL_HUMAN	COBL	Isoform 2 of Protein cordon-bleu			1	0	MS/MS	STY:79.9663@AEQLVLS(0.0114)GADS(0.4297)DEDT(0.2795)S(0.2795)R;
AEQPSPPNSDSGQDAHPDPDANPDAAR	AEQPSPPNSDS[79.9663]GQDAHPDPDANPDAAR	R	M	144	170	27	3	11S(79.9663)	sp|Q9BUA3|SPNDC_HUMAN	Q9BUA3	SPNDC_HUMAN	SPINDOC	Spindlin interactor and repressor of chromatin-binding protein			1	3.0334872E7	MS/MS	STY:79.9663@AEQPS(0.2419)PPNS(0.2419)DS(0.5161)GQDAHPDPDANPDAAR;
AEQPSPPNSDSGQDAHPDPDANPDAAR	AEQPSPPNS[79.9663]DS[79.9663]GQDAHPDPDANPDAAR	R	M	144	170	27	3	11S(79.9663),9S(79.9663)	sp|Q9BUA3|SPNDC_HUMAN	Q9BUA3	SPNDC_HUMAN	SPINDOC	Spindlin interactor and repressor of chromatin-binding protein			3	2.58673632E8	MS/MS	STY:79.9663@AEQPS(0.1228)PPNS(0.9386)DS(0.9386)GQDAHPDPDANPDAAR;
AEQPSPPNSDSGQDAHPDPDANPDAAR	AEQPS[79.9663]PPNSDSGQDAHPDPDANPDAAR	R	M	144	170	27	3	5S(79.9663)	sp|Q9BUA3|SPNDC_HUMAN	Q9BUA3	SPNDC_HUMAN	SPINDOC	Spindlin interactor and repressor of chromatin-binding protein			3	3.0334872E7	MS/MS	STY:79.9663@AEQPS(0.9428)PPNS(0.0286)DS(0.0286)GQDAHPDPDANPDAAR;
AEQPSPPNSDSGQDAHPDPDANPDAAR	AEQPS[79.9663]PPNSDS[79.9663]GQDAHPDPDANPDAAR	R	M	144	170	27	3	11S(79.9663),5S(79.9663)	sp|Q9BUA3|SPNDC_HUMAN	Q9BUA3	SPNDC_HUMAN	SPINDOC	Spindlin interactor and repressor of chromatin-binding protein			2	2.58673632E8	MS/MS	STY:79.9663@AEQPS(0.9443)PPNS(0.1115)DS(0.9442)GQDAHPDPDANPDAAR;
AEQPSPPNSDSGQDAHPDPDANPDAAR	AEQPS[79.9663]PPNS[79.9663]DSGQDAHPDPDANPDAAR	R	M	144	170	27	3	5S(79.9663),9S(79.9663)	sp|Q9BUA3|SPNDC_HUMAN	Q9BUA3	SPNDC_HUMAN	SPINDOC	Spindlin interactor and repressor of chromatin-binding protein			10	3.13121024E8	MS/MS	STY:79.9663@AEQPS(0.9487)PPNS(0.9487)DS(0.1025)GQDAHPDPDANPDAAR;
AESISSDEEVHESVDSDNQQNK	AESIS[79.9663]S[79.9663]DEEVHESVDSDNQQNK	R	K	43	64	22	3	5S(79.9663),6S(79.9663)	sp|Q9UKY1|ZHX1_HUMAN	Q9UKY1	ZHX1_HUMAN	ZHX1	Zinc fingers and homeoboxes protein 1			2	3.2001292E7	MS/MS	STY:79.9663@AES(0.0365)IS(0.9225)S(0.9219)DEEVHES(0.0686)VDS(0.0505)DNQQNK;
AESPESSAIESTQSTPQK	AESPESSAIES[79.9663]TQS[79.9663]T[79.9663]PQK	R	G	1356	1373	18	2	11S(79.9663),14S(79.9663),15T(79.9663)	sp|Q9NTI5|PDS5B_HUMAN	Q9NTI5	PDS5B_HUMAN	PDS5B	Sister chromatid cohesion protein PDS5 homolog B		sp|Q9NTI5-2|PDS5B_HUMAN	1	0	MS/MS	STY:79.9663@AES(0.2523)PES(0.0433)S(0.0914)AIES(0.8500)T(0.0579)QS(0.8526)T(0.8526)PQK;
AESPESSAIESTQSTPQK	AESPESS[79.9663]AIESTQSTPQK	R	G	1356	1373	18	2	7S(79.9663)	sp|Q9NTI5|PDS5B_HUMAN	Q9NTI5	PDS5B_HUMAN	PDS5B	Sister chromatid cohesion protein PDS5 homolog B		sp|Q9NTI5-2|PDS5B_HUMAN	1	4.97737088E8	MS/MS	STY:79.9663@AES(0.0186)PES(0.0186)S(0.8102)AIES(0.0360)T(0.0394)QS(0.0518)T(0.0254)PQK;
AESPESSAIESTQSTPQK	AESPES[79.9663]SAIESTQSTPQK	R	G	1356	1373	18	2	6S(79.9663)	sp|Q9NTI5|PDS5B_HUMAN	Q9NTI5	PDS5B_HUMAN	PDS5B	Sister chromatid cohesion protein PDS5 homolog B		sp|Q9NTI5-2|PDS5B_HUMAN	3	5.02969152E8	MS/MS	STY:79.9663@AES(0.0111)PES(0.4782)S(0.4782)AIES(0.0081)T(0.0081)QS(0.0081)T(0.0081)PQK;
AESPESSAIESTQSTPQK	AESPES[79.9663]SAIESTQST[79.9663]PQK	R	G	1356	1373	18	2	15T(79.9663),6S(79.9663)	sp|Q9NTI5|PDS5B_HUMAN	Q9NTI5	PDS5B_HUMAN	PDS5B	Sister chromatid cohesion protein PDS5 homolog B		sp|Q9NTI5-2|PDS5B_HUMAN	1	2.28580144E8	MS/MS	STY:79.9663@AES(0.0337)PES(0.5846)S(0.5846)AIES(0.0182)T(0.0185)QS(0.0185)T(0.7419)PQK;
AESPESSAIESTQSTPQK	AESPES[79.9663]SAIESTQS[79.9663]TPQK	R	G	1356	1373	18	2	14S(79.9663),6S(79.9663)	sp|Q9NTI5|PDS5B_HUMAN	Q9NTI5	PDS5B_HUMAN	PDS5B	Sister chromatid cohesion protein PDS5 homolog B		sp|Q9NTI5-2|PDS5B_HUMAN	1	2.41731952E8	MS/MS	STY:79.9663@AES(0.0177)PES(0.7486)S(0.0190)AIES(0.0178)T(0.0176)QS(0.5897)T(0.5897)PQK;
AESSDSGAESEEEEAQEEVK	AESSDS[79.9663]GAES[79.9663]EEEEAQEEVK	K	G	147	166	20	3	10S(79.9663),6S(79.9663)	sp|Q5T8D3-2|ACBD5_HUMAN	Q5T8D3-2	ACBD5_HUMAN	ACBD5	Isoform 2 of Acyl-CoA-binding domain-containing protein 5		sp|Q5T8D3-3|ACBD5_HUMAN, sp|Q5T8D3-4|ACBD5_HUMAN, sp|Q5T8D3|ACBD5_HUMAN	1	2.0109332E7	MS/MS	STY:79.9663@AES(0.3152)S(0.3152)DS(0.6851)GAES(0.6846)EEEEAQEEVK;
AESSSGGGTVPSSAGILEQGPSPGDGSPPK	AESSSGGGTVPSSAGILEQGPSPGDGS[79.9663]PPK	R	P	549	578	30	3	27S(79.9663)	sp|Q68EM7-5|RHG17_HUMAN	Q68EM7-5	RHG17_HUMAN	ARHGAP17	Isoform 5 of Rho GTPase-activating protein 17		sp|Q68EM7-3|RHG17_HUMAN, sp|Q68EM7-6|RHG17_HUMAN, sp|Q68EM7-7|RHG17_HUMAN, sp|Q68EM7|RHG17_HUMAN	1	1.3696926E7	MS/MS	STY:79.9663@AES(0.0752)S(0.0752)S(0.0871)GGGT(0.0616)VPS(0.0686)S(0.0686)AGILEQGPS(0.0052)PGDGS(0.5584)PPK;
AESSSGGGTVPSSAGILEQGPSPGDGSPPKPK	AESSSGGGTVPSSAGILEQGPSPGDGS[79.9663]PPKPK	R	D	549	580	32	3,4	27S(79.9663)	sp|Q68EM7-5|RHG17_HUMAN	Q68EM7-5	RHG17_HUMAN	ARHGAP17	Isoform 5 of Rho GTPase-activating protein 17		sp|Q68EM7-3|RHG17_HUMAN, sp|Q68EM7-6|RHG17_HUMAN, sp|Q68EM7-7|RHG17_HUMAN, sp|Q68EM7|RHG17_HUMAN	9	3.67070976E8	MS/MS	STY:79.9663@AES(0.0105)S(0.0105)S(0.0105)GGGT(0.0108)VPS(0.0180)S(0.0180)AGILEQGPS(0.0098)PGDGS(0.9118)PPKPK;
AESSSGGGTVPSSAGILEQGPSPGDGSPPKPK	AESSSGGGTVPSSAGILEQGPS[79.9663]PGDGSPPKPK	R	D	549	580	32	3	22S(79.9663)	sp|Q68EM7-5|RHG17_HUMAN	Q68EM7-5	RHG17_HUMAN	ARHGAP17	Isoform 5 of Rho GTPase-activating protein 17		sp|Q68EM7-3|RHG17_HUMAN, sp|Q68EM7-6|RHG17_HUMAN, sp|Q68EM7-7|RHG17_HUMAN, sp|Q68EM7|RHG17_HUMAN	2	3.3760224E8	MS/MS	STY:79.9663@AES(0.0537)S(0.0141)S(0.0106)GGGT(0.0115)VPS(0.0233)S(0.0252)AGILEQGPS(0.6134)PGDGS(0.2482)PPKPK;
AESSSGGGTVPSSAGILEQGPSPGDGSPPKPK	AESSSGGGT[79.9663]VPSSAGILEQGPSPGDGSPPKPK	R	D	549	580	32	4	9T(79.9663)	sp|Q68EM7-5|RHG17_HUMAN	Q68EM7-5	RHG17_HUMAN	ARHGAP17	Isoform 5 of Rho GTPase-activating protein 17		sp|Q68EM7-3|RHG17_HUMAN, sp|Q68EM7-6|RHG17_HUMAN, sp|Q68EM7-7|RHG17_HUMAN, sp|Q68EM7|RHG17_HUMAN	1	0	MS/MS	STY:79.9663@AES(0.0129)S(0.0129)S(0.0166)GGGT(0.3834)VPS(0.0081)S(0.0077)AGILEQGPS(0.2744)PGDGS(0.2841)PPKPK;
AESSDSGAESEEEEAQEEVK	AESS[79.9663]DSGAES[79.9663]EEEEAQEEVK	K	G	147	166	20	2	10S(79.9663),4S(79.9663)	sp|Q5T8D3-2|ACBD5_HUMAN	Q5T8D3-2	ACBD5_HUMAN	ACBD5	Isoform 2 of Acyl-CoA-binding domain-containing protein 5		sp|Q5T8D3-3|ACBD5_HUMAN, sp|Q5T8D3-4|ACBD5_HUMAN, sp|Q5T8D3|ACBD5_HUMAN	1	1.30707232E8	MS/MS	STY:79.9663@AES(0.0559)S(0.9406)DS(0.0627)GAES(0.9408)EEEEAQEEVK;
AESCGSFDETESEESSK	AES[79.9663]C[57.0215]GSFDETESEESSK	K	L	111	127	17	2	3S(79.9663),4C(57.0215)	sp|Q9Y343-2|SNX24_HUMAN	Q9Y343-2	SNX24_HUMAN	SNX24	Isoform 2 of Sorting nexin-24		sp|Q9Y343|SNX24_HUMAN	1	6741199	MS/MS	STY:79.9663@AES(0.1667)CGS(0.1667)FDET(0.1667)ES(0.1667)EES(0.1667)S(0.1667)K;
AESPEEVACR	AES[79.9663]PEEVAC[57.0215]R	R	K	1393	1402	10	2	3S(79.9663),9C(57.0215)	sp|Q7Z6Z7-2|HUWE1_HUMAN	Q7Z6Z7-2	HUWE1_HUMAN	HUWE1	Isoform 2 of E3 ubiquitin-protein ligase HUWE1		sp|Q7Z6Z7-3|HUWE1_HUMAN, sp|Q7Z6Z7|HUWE1_HUMAN	6	6.4477448E7	MS/MS	STY:79.9663@AES(1.0000)PEEVACR;
AESPESSAIESTQSTPQK	AES[79.9663]PESSAIESTQSTPQK	R	G	1356	1373	18	2,3	3S(79.9663)	sp|Q9NTI5|PDS5B_HUMAN	Q9NTI5	PDS5B_HUMAN	PDS5B	Sister chromatid cohesion protein PDS5 homolog B		sp|Q9NTI5-2|PDS5B_HUMAN	10	5.9676326E8	MS/MS	STY:79.9663@AES(0.9344)PES(0.0092)S(0.0092)AIES(0.0114)T(0.0114)QS(0.0122)T(0.0122)PQK;
AESPESSAIESTQSTPQK	AES[79.9663]PESSAIESTQST[79.9663]PQK	R	G	1356	1373	18	3	15T(79.9663),3S(79.9663)	sp|Q9NTI5|PDS5B_HUMAN	Q9NTI5	PDS5B_HUMAN	PDS5B	Sister chromatid cohesion protein PDS5 homolog B		sp|Q9NTI5-2|PDS5B_HUMAN	2	3.6210784E7	MS/MS	STY:79.9663@AES(0.7239)PES(0.0196)S(0.0196)AIES(0.0198)T(0.0198)QS(0.4102)T(0.7872)PQK;
AESPESSAIESTQSTPQK	AES[79.9663]PESSAIESTQS[79.9663]TPQK	R	G	1356	1373	18	2	14S(79.9663),3S(79.9663)	sp|Q9NTI5|PDS5B_HUMAN	Q9NTI5	PDS5B_HUMAN	PDS5B	Sister chromatid cohesion protein PDS5 homolog B		sp|Q9NTI5-2|PDS5B_HUMAN	1	2.41731952E8	MS/MS	STY:79.9663@AES(0.7470)PES(0.0174)S(0.0174)AIES(0.0195)T(0.0217)QS(0.5884)T(0.5884)PQK;
AESPESSAIESTQSTPQK	AES[79.9663]PESSAIES[79.9663]TQSTPQK	R	G	1356	1373	18	2	11S(79.9663),3S(79.9663)	sp|Q9NTI5|PDS5B_HUMAN	Q9NTI5	PDS5B_HUMAN	PDS5B	Sister chromatid cohesion protein PDS5 homolog B		sp|Q9NTI5-2|PDS5B_HUMAN	1	2.41731952E8	MS/MS	STY:79.9663@AES(0.5795)PES(0.0139)S(0.0139)AIES(0.4565)T(0.4565)QS(0.4565)T(0.0232)PQK;
AESPESSAIESTQSTPQK	AES[79.9663]PES[79.9663]SAIESTQSTPQK	R	G	1356	1373	18	3	3S(79.9663),6S(79.9663)	sp|Q9NTI5|PDS5B_HUMAN	Q9NTI5	PDS5B_HUMAN	PDS5B	Sister chromatid cohesion protein PDS5 homolog B		sp|Q9NTI5-2|PDS5B_HUMAN	2	3.6210784E7	MS/MS	STY:79.9663@AES(0.3872)PES(0.3872)S(0.3872)AIES(0.3872)T(0.3872)QS(0.0320)T(0.0320)PQK;
AESPSPAPPPGLR	AES[79.9663]PSPAPPPGLR	R	G	306	318	13	2	3S(79.9663)	sp|Q9BUA3|SPNDC_HUMAN	Q9BUA3	SPNDC_HUMAN	SPINDOC	Spindlin interactor and repressor of chromatin-binding protein			3	3.420056E7	MS/MS	STY:79.9663@AES(0.9456)PS(0.0544)PAPPPGLR;
AESSDSGAESEEEEAQEEVK	AES[79.9663]SDSGAES[79.9663]EEEEAQEEVK	K	G	147	166	20	2	10S(79.9663),3S(79.9663)	sp|Q5T8D3-2|ACBD5_HUMAN	Q5T8D3-2	ACBD5_HUMAN	ACBD5	Isoform 2 of Acyl-CoA-binding domain-containing protein 5		sp|Q5T8D3-3|ACBD5_HUMAN, sp|Q5T8D3-4|ACBD5_HUMAN, sp|Q5T8D3|ACBD5_HUMAN	3	1.30707232E8	MS/MS	STY:79.9663@AES(0.6306)S(0.6306)DS(0.0419)GAES(0.6969)EEEEAQEEVK;
AESSSGGGTVPSSAGILEQGPSPGDGSPPKPK	AES[79.9663]SSGGGTVPSSAGILEQGPSPGDGS[79.9663]PPKPK	R	D	549	580	32	3	27S(79.9663),3S(79.9663)	sp|Q68EM7-5|RHG17_HUMAN	Q68EM7-5	RHG17_HUMAN	ARHGAP17	Isoform 5 of Rho GTPase-activating protein 17		sp|Q68EM7-3|RHG17_HUMAN, sp|Q68EM7-6|RHG17_HUMAN, sp|Q68EM7-7|RHG17_HUMAN, sp|Q68EM7|RHG17_HUMAN	1	0	MS/MS	STY:79.9663@AES(0.3808)S(0.0127)S(0.3449)GGGT(0.3449)VPS(0.1240)S(0.1721)AGILEQGPS(0.1545)PGDGS(0.4660)PPKPK;
AESSDSGAESEEEEAQEEVK	AES[79.9663]S[79.9663]DSGAESEEEEAQEEVK	K	G	147	166	20	2,3	3S(79.9663),4S(79.9663)	sp|Q5T8D3-2|ACBD5_HUMAN	Q5T8D3-2	ACBD5_HUMAN	ACBD5	Isoform 2 of Acyl-CoA-binding domain-containing protein 5		sp|Q5T8D3-3|ACBD5_HUMAN, sp|Q5T8D3-4|ACBD5_HUMAN, sp|Q5T8D3|ACBD5_HUMAN	2	1.45878464E8	MS/MS	STY:79.9663@AES(0.6393)S(0.6393)DS(0.6393)GAES(0.0820)EEEEAQEEVK;
AESSSDEEEESEK	AES[79.9663]S[79.9663]S[79.9663]DEEEESEK	K	Q	877	889	13	2	3S(79.9663),4S(79.9663),5S(79.9663)	sp|Q8WWQ0|PHIP_HUMAN	Q8WWQ0	PHIP_HUMAN	PHIP	PH-interacting protein			2	1.6075277E7	MS/MS	STY:79.9663@AES(0.9476)S(0.9476)S(0.9476)DEEEES(0.1572)EK;
AETSEGSGSAPAVPEASASPK	AETSEGSGSAPAVPEASAS[79.9663]PK	K	Q	74	94	21	2,3	19S(79.9663)	sp|P51608-2|MECP2_HUMAN	P51608-2	MECP2_HUMAN	MECP2	Isoform B of Methyl-CpG-binding protein 2		sp|P51608|MECP2_HUMAN	3	1.13975312E8	MS/MS	STY:79.9663@AET(0.0169)S(0.0170)EGS(0.0170)GS(0.0148)APAVPEAS(0.0129)AS(0.9214)PK;
AETSEGSGSAPAVPEASASPK	AETSEGSGSAPAVPEAS[79.9663]ASPK	K	Q	74	94	21	2,3	17S(79.9663)	sp|P51608-2|MECP2_HUMAN	P51608-2	MECP2_HUMAN	MECP2	Isoform B of Methyl-CpG-binding protein 2		sp|P51608|MECP2_HUMAN	2	1.13975312E8	MS/MS	STY:79.9663@AET(0.0117)S(0.0117)EGS(0.0117)GS(0.0117)APAVPEAS(0.9256)AS(0.0277)PK;
AETPTESVSEPEVATK	AET[79.9663]PTESVSEPEVATK	K	Q	162	177	16	2	3T(79.9663)	sp|P18858-3|DNLI1_HUMAN	P18858-3	DNLI1_HUMAN	LIG1	Isoform 3 of DNA ligase 1		sp|P18858-2|DNLI1_HUMAN, sp|P18858|DNLI1_HUMAN	2	4.5843924E7	MS/MS	STY:79.9663@AET(0.9363)PT(0.0190)ES(0.0154)VS(0.0147)EPEVAT(0.0145)K;
AETPTESVSEPEVATK	AET[79.9663]PTESVSEPEVAT[79.9663]K	K	Q	162	177	16	2	15T(79.9663),3T(79.9663)	sp|P18858-3|DNLI1_HUMAN	P18858-3	DNLI1_HUMAN	LIG1	Isoform 3 of DNA ligase 1		sp|P18858-2|DNLI1_HUMAN, sp|P18858|DNLI1_HUMAN	2	1.9907686E7	MS/MS	STY:79.9663@AET(0.6322)PT(0.0277)ES(0.3397)VS(0.3981)EPEVAT(0.6023)K;
AEVYGSENESER	AEVYGSENES[79.9663]ER	K	N	345	356	12	2	10S(79.9663)	sp|Q9BVS4-2|RIOK2_HUMAN	Q9BVS4-2	RIOK2_HUMAN	RIOK2	Isoform 2 of Serine/threonine-protein kinase RIO2		sp|Q9BVS4|RIOK2_HUMAN	3	3.5659488E7	MS/MS	STY:79.9663@AEVY(0.0345)GS(0.0327)ENES(0.9328)ER;
AEVYGSENESER	AEVYGS[79.9663]ENESER	K	N	345	356	12	2	6S(79.9663)	sp|Q9BVS4-2|RIOK2_HUMAN	Q9BVS4-2	RIOK2_HUMAN	RIOK2	Isoform 2 of Serine/threonine-protein kinase RIO2		sp|Q9BVS4|RIOK2_HUMAN	1	0	MS/MS	STY:79.9663@AEVY(0.0346)GS(0.9169)ENES(0.0485)ER;
AEVYGSENESER	AEVY[79.9663]GSENESER	K	N	345	356	12	2	4Y(79.9663)	sp|Q9BVS4-2|RIOK2_HUMAN	Q9BVS4-2	RIOK2_HUMAN	RIOK2	Isoform 2 of Serine/threonine-protein kinase RIO2		sp|Q9BVS4|RIOK2_HUMAN	1	3.5444944E7	MS/MS	STY:79.9663@AEVY(0.4710)GS(0.4710)ENES(0.0580)ER;
AEVYGSENESER	AEVY[79.9663]GS[79.9663]ENESER	K	N	345	356	12	2	4Y(79.9663),6S(79.9663)	sp|Q9BVS4-2|RIOK2_HUMAN	Q9BVS4-2	RIOK2_HUMAN	RIOK2	Isoform 2 of Serine/threonine-protein kinase RIO2		sp|Q9BVS4|RIOK2_HUMAN	1	0	MS/MS	STY:79.9663@AEVY(0.8562)GS(0.8562)ENES(0.2876)ER;
AEYYSSPSNDSTNLLCLPNHMQASVSR	AEYYSSPSNDS[79.9663]T[79.9663]NLLC[57.0215]LPNHMQAS[79.9663]VSR	R	S	1484	1510	27	3	11S(79.9663),12T(79.9663),16C(57.0215),24S(79.9663)	sp|Q9UGM3-2|DMBT1_HUMAN	Q9UGM3-2	DMBT1_HUMAN	DMBT1	Isoform 2 of Deleted in malignant brain tumors 1 protein		sp|Q9UGM3-3|DMBT1_HUMAN, sp|Q9UGM3-4|DMBT1_HUMAN, sp|Q9UGM3-5|DMBT1_HUMAN, sp|Q9UGM3-6|DMBT1_HUMAN, sp|Q9UGM3-7|DMBT1_HUMAN, sp|Q9UGM3-8|DMBT1_HUMAN, sp|Q9UGM3-9|DMBT1_HUMAN, sp|Q9UGM3|DMBT1_HUMAN	1	0	MS/MS	STY:79.9663@AEY(0.2643)Y(0.2643)S(0.2643)S(0.2643)PS(0.0404)NDS(0.6184)T(0.6184)NLLCLPNHMQAS(0.6431)VS(0.0225)R;
AFAAVPTSHPPEDAPAQPPTPGPAASPEQLSFR	AFAAVPTSHPPEDAPAQPPTPGPAASPEQLS[79.9663]FR	R	E	1242	1274	33	3	31S(79.9663)	sp|Q14160-2|SCRIB_HUMAN	Q14160-2	SCRIB_HUMAN	SCRIB	Isoform 2 of Protein scribble homolog		sp|Q14160-3|SCRIB_HUMAN, sp|Q14160|SCRIB_HUMAN	1	2.5787032E7	MS/MS	STY:79.9663@AFAAVPT(0.1276)S(0.0816)HPPEDAPAQPPT(0.1377)PGPAAS(0.2756)PEQLS(0.3774)FR;
AFAAVPTSHPPEDAPAQPPTPGPAASPEQLSFR	AFAAVPTSHPPEDAPAQPPTPGPAAS[79.9663]PEQLSFR	R	E	1242	1274	33	3	26S(79.9663)	sp|Q14160-2|SCRIB_HUMAN	Q14160-2	SCRIB_HUMAN	SCRIB	Isoform 2 of Protein scribble homolog		sp|Q14160-3|SCRIB_HUMAN, sp|Q14160|SCRIB_HUMAN	1	0	MS/MS	STY:79.9663@AFAAVPT(0.0189)S(0.0189)HPPEDAPAQPPT(0.0350)PGPAAS(0.4636)PEQLS(0.4636)FR;
AFGPGLQGGSAGSPAR	AFGPGLQGGSAGS[79.9663]PAR	K	F	1072	1087	16	2	13S(79.9663)	sp|P21333-2|FLNA_HUMAN	P21333-2	FLNA_HUMAN	FLNA	Isoform 2 of Filamin-A		sp|P21333|FLNA_HUMAN	2	1.25435896E8	MS/MS	STY:79.9663@AFGPGLQGGS(0.0548)AGS(0.9452)PAR;
AFGPGLQGGSAGSPAR	AFGPGLQGGS[79.9663]AGSPAR	K	F	1072	1087	16	2	10S(79.9663)	sp|P21333-2|FLNA_HUMAN	P21333-2	FLNA_HUMAN	FLNA	Isoform 2 of Filamin-A		sp|P21333|FLNA_HUMAN	5	3.1717664E8	MS/MS	STY:79.9663@AFGPGLQGGS(0.9456)AGS(0.0544)PAR;
AFGSSQPSLNGDIK	AFGSS[79.9663]QPS[79.9663]LNGDIK	K	P	1183	1196	14	2	5S(79.9663),8S(79.9663)	sp|P32004-2|L1CAM_HUMAN	P32004-2	L1CAM_HUMAN	L1CAM	Isoform 2 of Neural cell adhesion molecule L1		sp|P32004-3|L1CAM_HUMAN, sp|P32004|L1CAM_HUMAN	1	0	MS/MS	STY:79.9663@AFGS(0.1026)S(0.9487)QPS(0.9487)LNGDIK;
AFGSSQPSLNGDIK	AFGS[79.9663]SQPS[79.9663]LNGDIK	K	P	1183	1196	14	2	4S(79.9663),8S(79.9663)	sp|P32004-2|L1CAM_HUMAN	P32004-2	L1CAM_HUMAN	L1CAM	Isoform 2 of Neural cell adhesion molecule L1		sp|P32004-3|L1CAM_HUMAN, sp|P32004|L1CAM_HUMAN	1	0	MS/MS	STY:79.9663@AFGS(0.9176)S(0.1642)QPS(0.9182)LNGDIK;
AFGSSQPSLNGDIK	AFGS[79.9663]S[79.9663]QPSLNGDIK	K	P	1183	1196	14	2	4S(79.9663),5S(79.9663)	sp|P32004-2|L1CAM_HUMAN	P32004-2	L1CAM_HUMAN	L1CAM	Isoform 2 of Neural cell adhesion molecule L1		sp|P32004-3|L1CAM_HUMAN, sp|P32004|L1CAM_HUMAN	3	8.0503288E7	MS/MS	STY:79.9663@AFGS(0.9411)S(0.9410)QPS(0.1179)LNGDIK;
AFKPEETSSNSDPPSPPVLNNSHPVPR	AFKPEETSSNS[79.9663]DPPS[79.9663]PPVLNNSHPVPR	R	S	641	667	27	3	11S(79.9663),15S(79.9663)	sp|O60293-2|ZC3H1_HUMAN	O60293-2	ZC3H1_HUMAN	ZFC3H1	Isoform 2 of Zinc finger C3H1 domain-containing protein		sp|O60293|ZC3H1_HUMAN	1	0	MS/MS	STY:79.9663@AFKPEET(0.3689)S(0.3689)S(0.3689)NS(0.4429)DPPS(0.4305)PPVLNNS(0.0200)HPVPR;
AFQLEEGEETEPDCK	AFQLEEGEET[79.9663]EPDC[57.0215]K	R	Y	113	127	15	2	10T(79.9663),14C(57.0215)	sp|P38432|COIL_HUMAN	P38432	COIL_HUMAN	COIL	Coilin			2	2.3147692E7	MS/MS	STY:79.9663@AFQLEEGEET(1.0000)EPDCK;
AFVEDSEDEDGAGEGGSSLLQK	AFVEDS[79.9663]EDEDGAGEGGSSLLQK	R	R	166	187	22	2,3	6S(79.9663)	sp|Q8N9T8|KRI1_HUMAN	Q8N9T8	KRI1_HUMAN	KRI1	Protein KRI1 homolog			5	2.1510136E8	MS/MS	STY:79.9663@AFVEDS(0.9367)EDEDGAGEGGS(0.0317)S(0.0317)LLQK;
AGAAAGDSDEESR	AGAAAGDSDEES[79.9663]R	R	A	330	342	13	2	12S(79.9663)	sp|O95365|ZBT7A_HUMAN	O95365	ZBT7A_HUMAN	ZBTB7A	Zinc finger and BTB domain-containing protein 7A			1	1.6110292E7	MS/MS	STY:79.9663@AGAAAGDS(0.0535)DEES(0.9465)R;
AGAAAGDSDEESR	AGAAAGDS[79.9663]DEESR	R	A	330	342	13	2	8S(79.9663)	sp|O95365|ZBT7A_HUMAN	O95365	ZBT7A_HUMAN	ZBTB7A	Zinc finger and BTB domain-containing protein 7A			2	1.6110292E7	MS/MS	STY:79.9663@AGAAAGDS(0.9267)DEES(0.0733)R;
AGAASPLNSPLSSAVPSLGK	AGAASPLNSPLS[79.9663]S[79.9663]AVPSLGK	R	E	2392	2411	20	2	12S(79.9663),13S(79.9663)	sp|O75962-4|TRIO_HUMAN	O75962-4	TRIO_HUMAN	TRIO	Isoform 4 of Triple functional domain protein		sp|O75962-5|TRIO_HUMAN, sp|O75962|TRIO_HUMAN	1	0	MS/MS	STY:79.9663@AGAAS(0.0309)PLNS(0.0310)PLS(0.6460)S(0.6460)AVPS(0.6460)LGK;
AGAASPLNSPLSSAVPSLGK	AGAASPLNS[79.9663]PLS[79.9663]SAVPSLGK	R	E	2392	2411	20	3	12S(79.9663),9S(79.9663)	sp|O75962-4|TRIO_HUMAN	O75962-4	TRIO_HUMAN	TRIO	Isoform 4 of Triple functional domain protein		sp|O75962-5|TRIO_HUMAN, sp|O75962|TRIO_HUMAN	1	5144252	MS/MS	STY:79.9663@AGAAS(0.0548)PLNS(0.6350)PLS(0.6350)S(0.6350)AVPS(0.0401)LGK;
AGAASPLNSPLSSAVPSLGK	AGAAS[79.9663]PLNSPLS[79.9663]SAVPSLGK	R	E	2392	2411	20	3	12S(79.9663),5S(79.9663)	sp|O75962-4|TRIO_HUMAN	O75962-4	TRIO_HUMAN	TRIO	Isoform 4 of Triple functional domain protein		sp|O75962-5|TRIO_HUMAN, sp|O75962|TRIO_HUMAN	1	0	MS/MS	STY:79.9663@AGAAS(0.4312)PLNS(0.4312)PLS(0.4996)S(0.2845)AVPS(0.3537)LGK;
AGAESPTMSVDGR	AGAES[79.9663]PTMSVDGR	R	Q	403	415	13	2	5S(79.9663)	sp|O75362|ZN217_HUMAN	O75362	ZN217_HUMAN	ZNF217	Zinc finger protein 217			1	0	MS/MS	STY:79.9663@AGAES(0.9419)PT(0.0291)MS(0.0291)VDGR;
AGAPGALSPSYDGGLHGLQSK	AGAPGALS[79.9663]PSYDGGLHGLQSK	R	I	372	392	21	3	8S(79.9663)	sp|P15923-2|TFE2_HUMAN	P15923-2	TFE2_HUMAN	TCF3	Isoform E47 of Transcription factor E2-alpha		sp|P15923-3|TFE2_HUMAN, sp|P15923|TFE2_HUMAN	1	7015657	MS/MS	STY:79.9663@AGAPGALS(0.4438)PS(0.0858)Y(0.0858)DGGLHGLQS(0.3847)K;
AGDLLEDSPK	AGDLLEDS[79.9663]PK	R	R	158	167	10	2	8S(79.9663)	sp|P51858|HDGF_HUMAN	P51858	HDGF_HUMAN	HDGF	Hepatoma-derived growth factor		sp|P51858-2|HDGF_HUMAN, sp|P51858-3|HDGF_HUMAN	25	2.8244137E9	MS/MS	STY:79.9663@AGDLLEDS(1.0000)PK;
AGDLLEDSPKRPK	AGDLLEDS[79.9663]PKRPK	R	E	158	170	13	3	8S(79.9663)	sp|P51858|HDGF_HUMAN	P51858	HDGF_HUMAN	HDGF	Hepatoma-derived growth factor		sp|P51858-2|HDGF_HUMAN, sp|P51858-3|HDGF_HUMAN	1	0	MS/MS	STY:79.9663@AGDLLEDS(1.0000)PKRPK;
AGDNIPEEQPVASTPTTVSDGENK	AGDNIPEEQPVASTPTTVS[79.9663]DGENK	K	K	232	255	24	3	19S(79.9663)	sp|Q9Y320-2|TMX2_HUMAN	Q9Y320-2	TMX2_HUMAN	TMX2	Isoform 2 of Thioredoxin-related transmembrane protein 2		sp|Q9Y320|TMX2_HUMAN	1	0	MS/MS	STY:79.9663@AGDNIPEEQPVAS(0.0250)T(0.0225)PT(0.0142)T(0.0143)VS(0.9240)DGENK;
AGDNIPEEQPVASTPTTVSDGENK	AGDNIPEEQPVASTPTT[79.9663]VSDGENK	K	K	232	255	24	3	17T(79.9663)	sp|Q9Y320-2|TMX2_HUMAN	Q9Y320-2	TMX2_HUMAN	TMX2	Isoform 2 of Thioredoxin-related transmembrane protein 2		sp|Q9Y320|TMX2_HUMAN	1	4.793148E7	MS/MS	STY:79.9663@AGDNIPEEQPVAS(0.0121)T(0.0121)PT(0.0143)T(0.4808)VS(0.4808)DGENK;
AGDNIPEEQPVASTPTTVSDGENK	AGDNIPEEQPVASTPT[79.9663]TVSDGENK	K	K	232	255	24	3	16T(79.9663)	sp|Q9Y320-2|TMX2_HUMAN	Q9Y320-2	TMX2_HUMAN	TMX2	Isoform 2 of Thioredoxin-related transmembrane protein 2		sp|Q9Y320|TMX2_HUMAN	6	4.3982008E7	MS/MS	STY:79.9663@AGDNIPEEQPVAS(0.0390)T(0.0190)PT(0.8906)T(0.0162)VS(0.0353)DGENK;
AGDTSDQEGHSLEEK	AGDT[79.9663]SDQEGHSLEEK	R	A	147	161	15	2	4T(79.9663)	sp|Q99607|ELF4_HUMAN	Q99607	ELF4_HUMAN	ELF4	ETS-related transcription factor Elf-4			1	9297458	MS/MS	STY:79.9663@AGDT(0.4898)S(0.4898)DQEGHS(0.0204)LEEK;
AGEAPTENPAPPTQQSSAE	AGEAPTENPAPPTQQS[79.9663]SAE	K	-	354	372	19	2	16S(79.9663)	sp|P16989|YBOX3_HUMAN	P16989	YBOX3_HUMAN	YBX3	Y-box-binding protein 3		sp|P16989-2|YBOX3_HUMAN	3	7.3910944E7	MS/MS	STY:79.9663@AGEAPT(0.0250)ENPAPPT(0.0229)QQS(0.9282)S(0.0240)AE;
AGEEDEGEEDSDSDYEISAK	AGEEDEGEEDS[79.9663]DSDYEISAK	R	A	463	482	20	2	11S(79.9663)	sp|A2RRP1-2|NBAS_HUMAN	A2RRP1-2	NBAS_HUMAN	NBAS	Isoform 2 of NBAS subunit of NRZ tethering complex		sp|A2RRP1|NBAS_HUMAN	1	6.1606248E7	MS/MS	STY:79.9663@AGEEDEGEEDS(0.8888)DS(0.0227)DY(0.0411)EIS(0.0473)AK;
AGEEDEGEEDSDSDYEISAK	AGEEDEGEEDS[79.9663]DS[79.9663]DYEISAK	R	A	463	482	20	2	11S(79.9663),13S(79.9663)	sp|A2RRP1-2|NBAS_HUMAN	A2RRP1-2	NBAS_HUMAN	NBAS	Isoform 2 of NBAS subunit of NRZ tethering complex		sp|A2RRP1|NBAS_HUMAN	1	3.153937E7	MS/MS	STY:79.9663@AGEEDEGEEDS(0.5000)DS(0.5000)DY(0.5000)EIS(0.5000)AK;
AGEPDGESLDEQPSSSSSK	AGEPDGES[79.9663]LDEQPSSSSSK	K	R	57	75	19	2	8S(79.9663)	sp|Q9H3Q1|BORG4_HUMAN	Q9H3Q1	BORG4_HUMAN	CDC42EP4	Cdc42 effector protein 4			2	0	MS/MS	STY:79.9663@AGEPDGES(0.9439)LDEQPS(0.0112)S(0.0112)S(0.0112)S(0.0112)S(0.0112)K;
AGEPNSPDAEEANSPDVTAGCDPAGVHPPR	AGEPNSPDAEEANSPDVT[79.9663]AGC[57.0215]DPAGVHPPR	R	-	738	767	30	3,4	18T(79.9663),21C(57.0215)	sp|Q08J23|NSUN2_HUMAN	Q08J23	NSUN2_HUMAN	NSUN2	RNA cytosine C(5)-methyltransferase NSUN2		sp|Q08J23-2|NSUN2_HUMAN, sp|Q08J23-3|NSUN2_HUMAN	7	1.73627238E9	MS/MS	STY:79.9663@AGEPNS(0.0466)PDAEEANS(0.0682)PDVT(0.8852)AGCDPAGVHPPR;
AGEPNSPDAEEANSPDVTAGCDPAGVHPPR	AGEPNSPDAEEANS[79.9663]PDVTAGC[57.0215]DPAGVHPPR	R	-	738	767	30	3,4	14S(79.9663),21C(57.0215)	sp|Q08J23|NSUN2_HUMAN	Q08J23	NSUN2_HUMAN	NSUN2	RNA cytosine C(5)-methyltransferase NSUN2		sp|Q08J23-2|NSUN2_HUMAN, sp|Q08J23-3|NSUN2_HUMAN	23	3.46737728E8	MS/MS	STY:79.9663@AGEPNS(0.0283)PDAEEANS(0.9437)PDVT(0.0280)AGCDPAGVHPPR;
AGEPNSPDAEEANSPDVTAGCDPAGVHPPR	AGEPNSPDAEEANS[79.9663]PDVT[79.9663]AGC[57.0215]DPAGVHPPR	R	-	738	767	30	3,4,5	14S(79.9663),18T(79.9663),21C(57.0215)	sp|Q08J23|NSUN2_HUMAN	Q08J23	NSUN2_HUMAN	NSUN2	RNA cytosine C(5)-methyltransferase NSUN2		sp|Q08J23-2|NSUN2_HUMAN, sp|Q08J23-3|NSUN2_HUMAN	12	1.12735654E9	MS/MS	STY:79.9663@AGEPNS(0.1047)PDAEEANS(0.9477)PDVT(0.9477)AGCDPAGVHPPR;
AGEPNSPDAEEANSPDVTAGCDPAGVHPPR	AGEPNS[79.9663]PDAEEANSPDVTAGC[57.0215]DPAGVHPPR	R	-	738	767	30	3,4	21C(57.0215),6S(79.9663)	sp|Q08J23|NSUN2_HUMAN	Q08J23	NSUN2_HUMAN	NSUN2	RNA cytosine C(5)-methyltransferase NSUN2		sp|Q08J23-2|NSUN2_HUMAN, sp|Q08J23-3|NSUN2_HUMAN	37	2.08301005E9	MS/MS	STY:79.9663@AGEPNS(0.9390)PDAEEANS(0.0316)PDVT(0.0294)AGCDPAGVHPPR;
AGEPNSPDAEEANSPDVTAGCDPAGVHPPR	AGEPNS[79.9663]PDAEEANSPDVT[79.9663]AGC[57.0215]DPAGVHPPR	R	-	738	767	30	3,4,5	18T(79.9663),21C(57.0215),6S(79.9663)	sp|Q08J23|NSUN2_HUMAN	Q08J23	NSUN2_HUMAN	NSUN2	RNA cytosine C(5)-methyltransferase NSUN2		sp|Q08J23-2|NSUN2_HUMAN, sp|Q08J23-3|NSUN2_HUMAN	16	8.0604457E9	MS/MS	STY:79.9663@AGEPNS(0.9457)PDAEEANS(0.1082)PDVT(0.9460)AGCDPAGVHPPR;
AGEPNSPDAEEANSPDVTAGCDPAGVHPPR	AGEPNS[79.9663]PDAEEANS[79.9663]PDVTAGC[57.0215]DPAGVHPPR	R	-	738	767	30	3,4,5	14S(79.9663),21C(57.0215),6S(79.9663)	sp|Q08J23|NSUN2_HUMAN	Q08J23	NSUN2_HUMAN	NSUN2	RNA cytosine C(5)-methyltransferase NSUN2		sp|Q08J23-2|NSUN2_HUMAN, sp|Q08J23-3|NSUN2_HUMAN	71	9.6498964E9	MS/MS	STY:79.9663@AGEPNS(0.9493)PDAEEANS(0.9500)PDVT(0.1007)AGCDPAGVHPPR;
AGEQQLSEPEDMEMEAGDTDDPPR	AGEQQLSEPEDM[15.9949]EM[15.9949]EAGDT[79.9663]DDPPR	K	I	12	35	24	3	12M(15.9949),14M(15.9949),19T(79.9663)	sp|Q93009|UBP7_HUMAN	Q93009	UBP7_HUMAN	USP7	Ubiquitin carboxyl-terminal hydrolase 7			1	3.074927E7	MS/MS	M:15.9949@AGEQQLSEPEDM(1.0000)EM(1.0000)EAGDTDDPPR;STY:79.9663@AGEQQLS(0.2460)EPEDMEMEAGDT(0.7540)DDPPR;
AGEQQLSEPEDMEMEAGDTDDPPR	AGEQQLS[79.9663]EPEDMEMEAGDTDDPPR	K	I	12	35	24	3	7S(79.9663)	sp|Q93009|UBP7_HUMAN	Q93009	UBP7_HUMAN	USP7	Ubiquitin carboxyl-terminal hydrolase 7			11	3.3807872E8	MS/MS	STY:79.9663@AGEQQLS(0.9461)EPEDMEMEAGDT(0.0539)DDPPR;
AGEQQLSEPEDMEMEAGDTDDPPR	AGEQQLS[79.9663]EPEDMEM[15.9949]EAGDTDDPPR	K	I	12	35	24	3	14M(15.9949),7S(79.9663)	sp|Q93009|UBP7_HUMAN	Q93009	UBP7_HUMAN	USP7	Ubiquitin carboxyl-terminal hydrolase 7			3	3.4648784E7	MS/MS	M:15.9949@AGEQQLSEPEDM(0.0610)EM(0.9390)EAGDTDDPPR;STY:79.9663@AGEQQLS(0.8886)EPEDMEMEAGDT(0.1114)DDPPR;
AGEQQLSEPEDMEMEAGDTDDPPR	AGEQQLS[79.9663]EPEDM[15.9949]EMEAGDTDDPPR	K	I	12	35	24	3	12M(15.9949),7S(79.9663)	sp|Q93009|UBP7_HUMAN	Q93009	UBP7_HUMAN	USP7	Ubiquitin carboxyl-terminal hydrolase 7			2	3.1961466E7	MS/MS	M:15.9949@AGEQQLSEPEDM(0.5000)EM(0.5000)EAGDTDDPPR;STY:79.9663@AGEQQLS(0.9332)EPEDMEMEAGDT(0.0668)DDPPR;
AGEQQLSEPEDMEMEAGDTDDPPR	AGEQQLS[79.9663]EPEDM[15.9949]EM[15.9949]EAGDTDDPPR	K	I	12	35	24	3	12M(15.9949),14M(15.9949),7S(79.9663)	sp|Q93009|UBP7_HUMAN	Q93009	UBP7_HUMAN	USP7	Ubiquitin carboxyl-terminal hydrolase 7			3	3.074927E7	MS/MS	M:15.9949@AGEQQLSEPEDM(1.0000)EM(1.0000)EAGDTDDPPR;STY:79.9663@AGEQQLS(0.9437)EPEDMEMEAGDT(0.0563)DDPPR;
AGGASPAASSTAQPPTQHR	AGGAS[79.9663]PAASSTAQPPTQHR	R	L	449	467	19	2	5S(79.9663)	sp|Q8IU81|I2BP1_HUMAN	Q8IU81	I2BP1_HUMAN	IRF2BP1	Interferon regulatory factor 2-binding protein 1			4	4.5073236E7	MS/MS	STY:79.9663@AGGAS(0.9388)PAAS(0.0159)S(0.0149)T(0.0149)AQPPT(0.0155)QHR;
AGGGAQPSQTATGDPSDEDEDSDLEEFVR	AGGGAQPSQTAT[79.9663]GDPSDEDEDS[79.9663]DLEEFVR	R	S	266	294	29	3	12T(79.9663),22S(79.9663)	sp|Q2YD98|UVSSA_HUMAN	Q2YD98	UVSSA_HUMAN	UVSSA	UV-stimulated scaffold protein A			1	4.4301124E7	MS/MS	STY:79.9663@AGGGAQPS(0.5335)QT(0.1594)AT(0.6482)GDPS(0.0702)DEDEDS(0.5886)DLEEFVR;
AGGGAQPSQTATGDPSDEDEDSDLEEFVR	AGGGAQPSQTAT[79.9663]GDPS[79.9663]DEDEDSDLEEFVR	R	S	266	294	29	3	12T(79.9663),16S(79.9663)	sp|Q2YD98|UVSSA_HUMAN	Q2YD98	UVSSA_HUMAN	UVSSA	UV-stimulated scaffold protein A			1	4.4301124E7	MS/MS	STY:79.9663@AGGGAQPS(0.0454)QT(0.0306)AT(0.6598)GDPS(0.6598)DEDEDS(0.6045)DLEEFVR;
AGGLGAEETPPTSVSESLPTLSDSDPVPLAPGAADSDEDTEGFGVPR	AGGLGAEETPPTSVSESLPTLSDSDPVPLAPGAADSDEDT[79.9663]EGFGVPR	R	H	748	794	47	4	40T(79.9663)	sp|Q66K74-2|MAP1S_HUMAN	Q66K74-2	MAP1S_HUMAN	MAP1S	Isoform 2 of Microtubule-associated protein 1S		sp|Q66K74|MAP1S_HUMAN	1	6.423454E7	MS/MS	STY:79.9663@AGGLGAEET(0.0596)PPT(0.0644)S(0.0685)VS(0.0542)ES(0.0747)LPT(0.0552)LS(0.0565)DS(0.0605)DPVPLAPGAADS(0.1201)DEDT(0.3863)EGFGVPR;
AGGLQDSDTEDECWSDTEAVPR	AGGLQDS[79.9663]DT[79.9663]EDEC[57.0215]WSDTEAVPR	R	A	188	209	22	3	13C(57.0215),7S(79.9663),9T(79.9663)	sp|Q9H6H4|REEP4_HUMAN	Q9H6H4	REEP4_HUMAN	REEP4	Receptor expression-enhancing protein 4			1	0	MS/MS	STY:79.9663@AGGLQDS(0.7731)DT(0.7703)EDECWS(0.2396)DT(0.2169)EAVPR;
AGGLQDSDTEDECWSDTEAVPR	AGGLQDS[79.9663]DT[79.9663]EDEC[57.0215]WS[79.9663]DTEAVPR	R	A	188	209	22	3	13C(57.0215),15S(79.9663),7S(79.9663),9T(79.9663)	sp|Q9H6H4|REEP4_HUMAN	Q9H6H4	REEP4_HUMAN	REEP4	Receptor expression-enhancing protein 4			4	8.7102576E7	MS/MS	STY:79.9663@AGGLQDS(0.9511)DT(0.9513)EDECWS(0.9515)DT(0.1460)EAVPR;
AGGPATPLSPTR	AGGPAT[79.9663]PLSPTR	R	L	29	40	12	2	6T(79.9663)	sp|Q03252|LMNB2_HUMAN	Q03252	LMNB2_HUMAN	LMNB2	Lamin-B2			2	1.2061463E7	MS/MS	STY:79.9663@AGGPAT(0.3333)PLS(0.3333)PT(0.3333)R;
AGGPTTPLSPTR	AGGPTTPLS[79.9663]PTR	R	L	15	26	12	2	9S(79.9663)	sp|P20700|LMNB1_HUMAN	P20700	LMNB1_HUMAN	LMNB1	Lamin-B1			3	6.5063688E7	MS/MS	STY:79.9663@AGGPT(0.0182)T(0.0182)PLS(0.9304)PT(0.0331)R;
AGGPTTPLSPTR	AGGPTTPLS[79.9663]PT[79.9663]R	R	L	15	26	12	2	11T(79.9663),9S(79.9663)	sp|P20700|LMNB1_HUMAN	P20700	LMNB1_HUMAN	LMNB1	Lamin-B1			3	1.60072032E8	MS/MS	STY:79.9663@AGGPT(0.0641)T(0.0641)PLS(0.9371)PT(0.9347)R;
AGGPTTPLSPTR	AGGPTT[79.9663]PLS[79.9663]PTR	R	L	15	26	12	2	6T(79.9663),9S(79.9663)	sp|P20700|LMNB1_HUMAN	P20700	LMNB1_HUMAN	LMNB1	Lamin-B1			1	0	MS/MS	STY:79.9663@AGGPT(0.0421)T(0.6979)PLS(0.6300)PT(0.6300)R;
AGGPTTPLSPTR	AGGPT[79.9663]TPLSPTR	R	L	15	26	12	2	5T(79.9663)	sp|P20700|LMNB1_HUMAN	P20700	LMNB1_HUMAN	LMNB1	Lamin-B1			2	6.529416E7	MS/MS	STY:79.9663@AGGPT(0.3864)T(0.3864)PLS(0.0103)PT(0.2170)R;
AGGPTTPLSPTR	AGGPT[79.9663]T[79.9663]PLSPTR	R	L	15	26	12	2	5T(79.9663),6T(79.9663)	sp|P20700|LMNB1_HUMAN	P20700	LMNB1_HUMAN	LMNB1	Lamin-B1			2	1.60072032E8	MS/MS	STY:79.9663@AGGPT(0.6488)T(0.6488)PLS(0.6488)PT(0.0536)R;
AGGSAALSPSK	AGGSAALSPS[79.9663]K	K	K	24	34	11	2	10S(79.9663)	sp|Q92522|H1X_HUMAN	Q92522	H1X_HUMAN	H1-10	Histone H1.10			1	2.5994848E8	MS/MS	STY:79.9663@AGGS(0.0272)AALS(0.0308)PS(0.9420)K;
AGGSAALSPSK	AGGSAALS[79.9663]PSK	K	K	24	34	11	2	8S(79.9663)	sp|Q92522|H1X_HUMAN	Q92522	H1X_HUMAN	H1-10	Histone H1.10			5	3.92502528E8	MS/MS	STY:79.9663@AGGS(0.0172)AALS(0.4914)PS(0.4914)K;
AGGSAALSPSK	AGGS[79.9663]AALSPSK	K	K	24	34	11	2	4S(79.9663)	sp|Q92522|H1X_HUMAN	Q92522	H1X_HUMAN	H1-10	Histone H1.10			2	3.92502528E8	MS/MS	STY:79.9663@AGGS(0.9395)AALS(0.0286)PS(0.0319)K;
AGGSPAPGPETPAISPSK	AGGS[79.9663]PAPGPETPAISPSK	K	R	85	102	18	2	4S(79.9663)	sp|P33316|DUT_HUMAN	P33316	DUT_HUMAN	DUT	Deoxyuridine 5'-triphosphate nucleotidohydrolase, mitochondrial			3	1.8851056E7	MS/MS	STY:79.9663@AGGS(0.7852)PAPGPET(0.1030)PAIS(0.0666)PS(0.0452)K;
AGGSPASYHGSTSPR	AGGS[79.9663]PASYHGSTS[79.9663]PR	K	V	189	203	15	2	13S(79.9663),4S(79.9663)	sp|O95208-2|EPN2_HUMAN	O95208-2	EPN2_HUMAN	EPN2	Isoform 2 of Epsin-2		sp|O95208-3|EPN2_HUMAN	1	5.2469188E7	MS/MS	STY:79.9663@AGGS(0.9228)PAS(0.0388)Y(0.0388)HGS(0.0388)T(0.0378)S(0.9229)PR;
AGGSPASYHGSTSPR	AGGS[79.9663]PASYHGS[79.9663]TSPR	K	V	189	203	15	2	11S(79.9663),4S(79.9663)	sp|O95208-2|EPN2_HUMAN	O95208-2	EPN2_HUMAN	EPN2	Isoform 2 of Epsin-2		sp|O95208-3|EPN2_HUMAN	1	5.2469188E7	MS/MS	STY:79.9663@AGGS(0.5661)PAS(0.0184)Y(0.0184)HGS(0.4657)T(0.4657)S(0.4657)PR;
AGGSPASYHGSTSPR	AGGS[79.9663]PAS[79.9663]YHGSTSPR	K	V	189	203	15	2	4S(79.9663),7S(79.9663)	sp|O95208-2|EPN2_HUMAN	O95208-2	EPN2_HUMAN	EPN2	Isoform 2 of Epsin-2		sp|O95208-3|EPN2_HUMAN	2	5.2469188E7	MS/MS	STY:79.9663@AGGS(0.7321)PAS(0.6021)Y(0.6021)HGS(0.0212)T(0.0212)S(0.0212)PR;
AGHDAGPDLVPSPDLDPVPSPDPDPVPSPDPNPVSCPDPCSPTR	AGHDAGPDLVPSPDLDPVPSPDPDPVPSPDPNPVS[79.9663]C[57.0215]PDPC[57.0215]S[79.9663]PT[79.9663]R	K	G	498	541	44	4	35S(79.9663),36C(57.0215),40C(57.0215),41S(79.9663),43T(79.9663)	sp|Q9NW07|ZN358_HUMAN	Q9NW07	ZN358_HUMAN	ZNF358	Zinc finger protein 358			1	0	MS/MS	STY:79.9663@AGHDAGPDLVPS(0.3938)PDLDPVPS(0.1871)PDPDPVPS(0.5604)PDPNPVS(0.6196)CPDPCS(0.6196)PT(0.6196)R;
AGHDGDSDGDSDDEEGYFICPITDDPSSNQNVNSK	AGHDGDSDGDSDDEEGYFIC[57.0215]PITDDPS[79.9663]S[79.9663]NQNVNSK	R	V	21	55	35	4	20C(57.0215),27S(79.9663),28S(79.9663)	sp|O00418|EF2K_HUMAN	O00418	EF2K_HUMAN	EEF2K	Eukaryotic elongation factor 2 kinase			1	4757323	MS/MS	STY:79.9663@AGHDGDS(0.3547)DGDS(0.3547)DDEEGY(0.0484)FICPIT(0.0484)DDPS(0.3980)S(0.3980)NQNVNS(0.3980)K;
AGHDGDSDGDSDDEEGYFICPITDDPSSNQNVNSK	AGHDGDSDGDSDDEEGY[79.9663]FIC[57.0215]PITDDPSSNQNVNS[79.9663]K	R	V	21	55	35	3	17Y(79.9663),20C(57.0215),34S(79.9663)	sp|O00418|EF2K_HUMAN	O00418	EF2K_HUMAN	EEF2K	Eukaryotic elongation factor 2 kinase			1	5.4732984E7	MS/MS	STY:79.9663@AGHDGDS(0.0195)DGDS(0.1719)DDEEGY(0.4452)FICPIT(0.2762)DDPS(0.3097)S(0.3097)NQNVNS(0.4677)K;
AGHDGDSDGDSDDEEGYFICPITDDPSSNQNVNSK	AGHDGDSDGDS[79.9663]DDEEGY[79.9663]FIC[57.0215]PITDDPSSNQNVNSK	R	V	21	55	35	4	11S(79.9663),17Y(79.9663),20C(57.0215)	sp|O00418|EF2K_HUMAN	O00418	EF2K_HUMAN	EEF2K	Eukaryotic elongation factor 2 kinase			1	0	MS/MS	STY:79.9663@AGHDGDS(0.3246)DGDS(0.4956)DDEEGY(0.4956)FICPIT(0.4956)DDPS(0.0629)S(0.0629)NQNVNS(0.0629)K;
AGLESGAEPGDGDSDTTK	AGLESGAEPGDGDSDTT[79.9663]K	K	K	481	498	18	2	17T(79.9663)	sp|O60832|DKC1_HUMAN	O60832	DKC1_HUMAN	DKC1	H/ACA ribonucleoprotein complex subunit DKC1			2	8.9100384E8	MS/MS	STY:79.9663@AGLES(0.0255)GAEPGDGDS(0.0209)DT(0.0209)T(0.9328)K;
AGLESGAEPGDGDSDTTK	AGLESGAEPGDGDSDT[79.9663]TK	K	K	481	498	18	2	16T(79.9663)	sp|O60832|DKC1_HUMAN	O60832	DKC1_HUMAN	DKC1	H/ACA ribonucleoprotein complex subunit DKC1			3	0	MS/MS	STY:79.9663@AGLES(0.0176)GAEPGDGDS(0.0227)DT(0.4798)T(0.4798)K;
AGLESGAEPGDGDSDTTK	AGLESGAEPGDGDS[79.9663]DTTK	K	K	481	498	18	2	14S(79.9663)	sp|O60832|DKC1_HUMAN	O60832	DKC1_HUMAN	DKC1	H/ACA ribonucleoprotein complex subunit DKC1			9	1.65165389E9	MS/MS	STY:79.9663@AGLES(0.0271)GAEPGDGDS(0.9228)DT(0.0251)T(0.0251)K;
AGLESGAEPGDGDSDTTK	AGLESGAEPGDGDS[79.9663]DT[79.9663]TK	K	K	481	498	18	2	14S(79.9663),16T(79.9663)	sp|O60832|DKC1_HUMAN	O60832	DKC1_HUMAN	DKC1	H/ACA ribonucleoprotein complex subunit DKC1			2	2.76423456E8	MS/MS	STY:79.9663@AGLES(0.0451)GAEPGDGDS(0.7695)DT(0.7695)T(0.4159)K;
AGLESGAEPGDGDSDTTK	AGLES[79.9663]GAEPGDGDSDTTK	K	K	481	498	18	2	5S(79.9663)	sp|O60832|DKC1_HUMAN	O60832	DKC1_HUMAN	DKC1	H/ACA ribonucleoprotein complex subunit DKC1			7	1.14006579E9	MS/MS	STY:79.9663@AGLES(0.9448)GAEPGDGDS(0.0184)DT(0.0184)T(0.0184)K;
AGLESGAEPGDGDSDTTK	AGLES[79.9663]GAEPGDGDSDT[79.9663]TK	K	K	481	498	18	2	16T(79.9663),5S(79.9663)	sp|O60832|DKC1_HUMAN	O60832	DKC1_HUMAN	DKC1	H/ACA ribonucleoprotein complex subunit DKC1			1	2.76423456E8	MS/MS	STY:79.9663@AGLES(0.9408)GAEPGDGDS(0.0641)DT(0.9421)T(0.0530)K;
AGLESGAEPGDGDSDTTK	AGLES[79.9663]GAEPGDGDS[79.9663]DTTK	K	K	481	498	18	2	14S(79.9663),5S(79.9663)	sp|O60832|DKC1_HUMAN	O60832	DKC1_HUMAN	DKC1	H/ACA ribonucleoprotein complex subunit DKC1			5	3.75542592E8	MS/MS	STY:79.9663@AGLES(0.9427)GAEPGDGDS(0.9497)DT(0.0538)T(0.0538)K;
AGLGSPERPPK	AGLGS[79.9663]PERPPK	R	T	54	64	11	2	5S(79.9663)	sp|Q9H6F5|CCD86_HUMAN	Q9H6F5	CCD86_HUMAN	CCDC86	Coiled-coil domain-containing protein 86			4	7.0060192E7	MS/MS	STY:79.9663@AGLGS(1.0000)PERPPK;
AGLLATLQDTQK	AGLLAT[79.9663]LQDTQK	K	Q	360	371	12	2	6T(79.9663)	sp|Q8TD16-2|BICD2_HUMAN	Q8TD16-2	BICD2_HUMAN	BICD2	Isoform 2 of Protein bicaudal D homolog 2		sp|Q8TD16|BICD2_HUMAN	2	4.4305656E7	MS/MS	STY:79.9663@AGLLAT(0.9356)LQDT(0.0644)QK;
AGLYSDVYK	AGLY[79.9663]S[79.9663]DVYK	K	T	1992	2000	9	2	4Y(79.9663),5S(79.9663)	sp|Q9NR48-2|ASH1L_HUMAN	Q9NR48-2	ASH1L_HUMAN	ASH1L	Isoform 2 of Histone-lysine N-methyltransferase ASH1L		sp|Q9NR48|ASH1L_HUMAN	1	0	MS/MS	STY:79.9663@AGLY(0.6667)S(0.6667)DVY(0.6667)K;
AGMSSNQSISSPVLDAVPR	AGMSSNQSISS[79.9663]PVLDAVPR	K	T	1394	1412	19	3	11S(79.9663)	sp|Q9UQ35|SRRM2_HUMAN	Q9UQ35	SRRM2_HUMAN	SRRM2	Serine/arginine repetitive matrix protein 2		sp|Q9UQ35-2|SRRM2_HUMAN	1	0	MS/MS	STY:79.9663@AGMS(0.0176)S(0.0176)NQS(0.0176)IS(0.0174)S(0.9298)PVLDAVPR;
AGMSSNQSISSPVLDAVPR	AGMSSNQSIS[79.9663]SPVLDAVPR	K	T	1394	1412	19	2,3	10S(79.9663)	sp|Q9UQ35|SRRM2_HUMAN	Q9UQ35	SRRM2_HUMAN	SRRM2	Serine/arginine repetitive matrix protein 2		sp|Q9UQ35-2|SRRM2_HUMAN	4	9.4215288E7	MS/MS	STY:79.9663@AGMS(0.0159)S(0.0171)NQS(0.0303)IS(0.9214)S(0.0154)PVLDAVPR;
AGMSSNQSISSPVLDAVPR	AGMSSNQSIS[79.9663]S[79.9663]PVLDAVPR	K	T	1394	1412	19	2	10S(79.9663),11S(79.9663)	sp|Q9UQ35|SRRM2_HUMAN	Q9UQ35	SRRM2_HUMAN	SRRM2	Serine/arginine repetitive matrix protein 2		sp|Q9UQ35-2|SRRM2_HUMAN	2	1.21832984E8	MS/MS	STY:79.9663@AGMS(0.0376)S(0.0376)NQS(0.0395)IS(0.9426)S(0.9428)PVLDAVPR;
AGMSSNQSISSPVLDAVPR	AGMSSNQS[79.9663]ISSPVLDAVPR	K	T	1394	1412	19	2	8S(79.9663)	sp|Q9UQ35|SRRM2_HUMAN	Q9UQ35	SRRM2_HUMAN	SRRM2	Serine/arginine repetitive matrix protein 2		sp|Q9UQ35-2|SRRM2_HUMAN	1	0	MS/MS	STY:79.9663@AGMS(0.0228)S(0.0105)NQS(0.4757)IS(0.4757)S(0.0153)PVLDAVPR;
AGMSSNQSISSPVLDAVPR	AGMSSNQS[79.9663]ISS[79.9663]PVLDAVPR	K	T	1394	1412	19	2	11S(79.9663),8S(79.9663)	sp|Q9UQ35|SRRM2_HUMAN	Q9UQ35	SRRM2_HUMAN	SRRM2	Serine/arginine repetitive matrix protein 2		sp|Q9UQ35-2|SRRM2_HUMAN	1	1.54919184E8	MS/MS	STY:79.9663@AGMS(0.3086)S(0.0888)NQS(0.7689)IS(0.0515)S(0.7822)PVLDAVPR;
AGMSSNQSISSPVLDAVPR	AGMSSNQS[79.9663]IS[79.9663]SPVLDAVPR	K	T	1394	1412	19	2	10S(79.9663),8S(79.9663)	sp|Q9UQ35|SRRM2_HUMAN	Q9UQ35	SRRM2_HUMAN	SRRM2	Serine/arginine repetitive matrix protein 2		sp|Q9UQ35-2|SRRM2_HUMAN	2	1.44288832E8	MS/MS	STY:79.9663@AGMS(0.1374)S(0.0281)NQS(0.6823)IS(0.7142)S(0.4380)PVLDAVPR;
AGMSSNQSISSPVLDAVPR	AGMSS[79.9663]NQSIS[79.9663]SPVLDAVPR	K	T	1394	1412	19	2,3	10S(79.9663),5S(79.9663)	sp|Q9UQ35|SRRM2_HUMAN	Q9UQ35	SRRM2_HUMAN	SRRM2	Serine/arginine repetitive matrix protein 2		sp|Q9UQ35-2|SRRM2_HUMAN	2	2.8858184E7	MS/MS	STY:79.9663@AGMS(0.0324)S(0.7119)NQS(0.0299)IS(0.6129)S(0.6129)PVLDAVPR;
AGMSSNQSISSPVLDAVPR	AGMS[79.9663]SNQSISSPVLDAVPR	K	T	1394	1412	19	2	4S(79.9663)	sp|Q9UQ35|SRRM2_HUMAN	Q9UQ35	SRRM2_HUMAN	SRRM2	Serine/arginine repetitive matrix protein 2		sp|Q9UQ35-2|SRRM2_HUMAN	1	7.3661368E7	MS/MS	STY:79.9663@AGMS(0.3205)S(0.3205)NQS(0.3205)IS(0.0193)S(0.0193)PVLDAVPR;
AGMSSNQSISSPVLDAVPR	AGMS[79.9663]SNQSISS[79.9663]PVLDAVPR	K	T	1394	1412	19	2	11S(79.9663),4S(79.9663)	sp|Q9UQ35|SRRM2_HUMAN	Q9UQ35	SRRM2_HUMAN	SRRM2	Serine/arginine repetitive matrix protein 2		sp|Q9UQ35-2|SRRM2_HUMAN	1	1.21832984E8	MS/MS	STY:79.9663@AGMS(0.4388)S(0.4388)NQS(0.3831)IS(0.2397)S(0.4995)PVLDAVPR;
AGMSSNQSISSPVLDAVPR	AGMS[79.9663]SNQSIS[79.9663]SPVLDAVPR	K	T	1394	1412	19	2	10S(79.9663),4S(79.9663)	sp|Q9UQ35|SRRM2_HUMAN	Q9UQ35	SRRM2_HUMAN	SRRM2	Serine/arginine repetitive matrix protein 2		sp|Q9UQ35-2|SRRM2_HUMAN	2	2.4261944E7	MS/MS	STY:79.9663@AGMS(0.4740)S(0.4740)NQS(0.4740)IS(0.5503)S(0.0277)PVLDAVPR;
AGMSSNQSISSPVLDAVPR	AGMS[79.9663]S[79.9663]NQSISSPVLDAVPR	K	T	1394	1412	19	3	4S(79.9663),5S(79.9663)	sp|Q9UQ35|SRRM2_HUMAN	Q9UQ35	SRRM2_HUMAN	SRRM2	Serine/arginine repetitive matrix protein 2		sp|Q9UQ35-2|SRRM2_HUMAN	2	5.2425616E7	MS/MS	STY:79.9663@AGMS(0.4865)S(0.4865)NQS(0.0912)IS(0.4679)S(0.4679)PVLDAVPR;
AGMSSNQSISSPVLDAVPR	AGMS[79.9663]S[79.9663]NQS[79.9663]ISSPVLDAVPR	K	T	1394	1412	19	2	4S(79.9663),5S(79.9663),8S(79.9663)	sp|Q9UQ35|SRRM2_HUMAN	Q9UQ35	SRRM2_HUMAN	SRRM2	Serine/arginine repetitive matrix protein 2		sp|Q9UQ35-2|SRRM2_HUMAN	1	2.077101E7	MS/MS	STY:79.9663@AGMS(0.5917)S(0.5917)NQS(0.6334)IS(0.5917)S(0.5917)PVLDAVPR;
AGMTSSPDATTGQTFG	AGMTSSPDATTGQT[79.9663]FG	R	-	116	131	16	2	14T(79.9663)	sp|Q9UQR1-2|ZN148_HUMAN	Q9UQR1-2	ZN148_HUMAN	ZNF148	Isoform 2 of Zinc finger protein 148		sp|Q9UQR1|ZN148_HUMAN	1	3.1300188E7	MS/MS	STY:79.9663@AGMT(0.0256)S(0.0256)S(0.0256)PDAT(0.0256)T(0.0769)GQT(0.8206)FG;
AGMTSSPDATTGQTFG	AGMTSSPDAT[79.9663]TGQTFG	R	-	116	131	16	2	10T(79.9663)	sp|Q9UQR1-2|ZN148_HUMAN	Q9UQR1-2	ZN148_HUMAN	ZNF148	Isoform 2 of Zinc finger protein 148		sp|Q9UQR1|ZN148_HUMAN	1	1.835721E7	MS/MS	STY:79.9663@AGMT(0.1354)S(0.1354)S(0.1648)PDAT(0.1881)T(0.1881)GQT(0.1881)FG;
AGMTSSPDATTGQTFG	AGMT[79.9663]SSPDATTGQTFG	R	-	116	131	16	2	4T(79.9663)	sp|Q9UQR1-2|ZN148_HUMAN	Q9UQR1-2	ZN148_HUMAN	ZNF148	Isoform 2 of Zinc finger protein 148		sp|Q9UQR1|ZN148_HUMAN	2	3.1300188E7	MS/MS	STY:79.9663@AGMT(0.3240)S(0.3240)S(0.3240)PDAT(0.0062)T(0.0062)GQT(0.0155)FG;
AGMSSNQSISSPVLDAVPR	AGM[15.9949]SSNQSISS[79.9663]PVLDAVPR	K	T	1394	1412	19	2	11S(79.9663),3M(15.9949)	sp|Q9UQ35|SRRM2_HUMAN	Q9UQ35	SRRM2_HUMAN	SRRM2	Serine/arginine repetitive matrix protein 2		sp|Q9UQ35-2|SRRM2_HUMAN	1	3.5965656E7	MS/MS	M:15.9949@AGM(1.0000)SSNQSISSPVLDAVPR;STY:79.9663@AGMS(0.0131)S(0.0131)NQS(0.0153)IS(0.2943)S(0.6643)PVLDAVPR;
AGMSSNQSISSPVLDAVPR	AGM[15.9949]SSNQSIS[79.9663]SPVLDAVPR	K	T	1394	1412	19	2	10S(79.9663),3M(15.9949)	sp|Q9UQ35|SRRM2_HUMAN	Q9UQ35	SRRM2_HUMAN	SRRM2	Serine/arginine repetitive matrix protein 2		sp|Q9UQ35-2|SRRM2_HUMAN	1	3.5965656E7	MS/MS	M:15.9949@AGM(1.0000)SSNQSISSPVLDAVPR;STY:79.9663@AGMS(0.0104)S(0.0104)NQS(0.0125)IS(0.4833)S(0.4833)PVLDAVPR;
AGMSSNQSISSPVLDAVPR	AGM[15.9949]SSNQSIS[79.9663]S[79.9663]PVLDAVPR	K	T	1394	1412	19	3	10S(79.9663),11S(79.9663),3M(15.9949)	sp|Q9UQ35|SRRM2_HUMAN	Q9UQ35	SRRM2_HUMAN	SRRM2	Serine/arginine repetitive matrix protein 2		sp|Q9UQ35-2|SRRM2_HUMAN	1	2.6313958E7	MS/MS	M:15.9949@AGM(1.0000)SSNQSISSPVLDAVPR;STY:79.9663@AGMS(0.0397)S(0.0397)NQS(0.0397)IS(0.9404)S(0.9404)PVLDAVPR;
AGMSSNQSISSPVLDAVPR	AGM[15.9949]S[79.9663]SNQSISS[79.9663]PVLDAVPR	K	T	1394	1412	19	2	11S(79.9663),3M(15.9949),4S(79.9663)	sp|Q9UQ35|SRRM2_HUMAN	Q9UQ35	SRRM2_HUMAN	SRRM2	Serine/arginine repetitive matrix protein 2		sp|Q9UQ35-2|SRRM2_HUMAN	1	4.5882728E7	MS/MS	M:15.9949@AGM(1.0000)SSNQSISSPVLDAVPR;STY:79.9663@AGMS(0.5979)S(0.5979)NQS(0.0652)IS(0.0652)S(0.6737)PVLDAVPR;
AGMSSNQSISSPVLDAVPR	AGM[15.9949]S[79.9663]SNQS[79.9663]ISSPVLDAVPR	K	T	1394	1412	19	2,3	3M(15.9949),4S(79.9663),8S(79.9663)	sp|Q9UQ35|SRRM2_HUMAN	Q9UQ35	SRRM2_HUMAN	SRRM2	Serine/arginine repetitive matrix protein 2		sp|Q9UQ35-2|SRRM2_HUMAN	2	2.6313958E7	MS/MS	M:15.9949@AGM(1.0000)SSNQSISSPVLDAVPR;STY:79.9663@AGMS(0.7052)S(0.0463)NQS(0.6074)IS(0.6074)S(0.0336)PVLDAVPR;
AGMSSNQSISSPVLDAVPR	AGM[15.9949]S[79.9663]S[79.9663]NQSISSPVLDAVPR	K	T	1394	1412	19	2	3M(15.9949),4S(79.9663),5S(79.9663)	sp|Q9UQ35|SRRM2_HUMAN	Q9UQ35	SRRM2_HUMAN	SRRM2	Serine/arginine repetitive matrix protein 2		sp|Q9UQ35-2|SRRM2_HUMAN	2	4.5882728E7	MS/MS	M:15.9949@AGM(1.0000)SSNQSISSPVLDAVPR;STY:79.9663@AGMS(0.4196)S(0.4196)NQS(0.4196)IS(0.4196)S(0.3216)PVLDAVPR;
AGMTSSPDATTGQTFG	AGM[15.9949]TSSPDATTGQT[79.9663]FG	R	-	116	131	16	2	14T(79.9663),3M(15.9949)	sp|Q9UQR1-2|ZN148_HUMAN	Q9UQR1-2	ZN148_HUMAN	ZNF148	Isoform 2 of Zinc finger protein 148		sp|Q9UQR1|ZN148_HUMAN	1	7488488	MS/MS	M:15.9949@AGM(1.0000)TSSPDATTGQTFG;STY:79.9663@AGMT(0.0116)S(0.0116)S(0.0116)PDAT(0.0139)T(0.0139)GQT(0.9373)FG;
AGNSDSEEDDANGR	AGNS[79.9663]DS[79.9663]EEDDANGR	K	V	155	168	14	2	4S(79.9663),6S(79.9663)	sp|Q641Q2-2|WAC2A_HUMAN	Q641Q2-2	WAC2A_HUMAN	WASHC2A	Isoform 2 of WASH complex subunit 2A	WASHC2C	sp|Q641Q2|WAC2A_HUMAN, sp|Q9Y4E1-1|WAC2C_HUMAN, sp|Q9Y4E1-2|WAC2C_HUMAN, sp|Q9Y4E1-3|WAC2C_HUMAN, sp|Q9Y4E1-4|WAC2C_HUMAN, sp|Q9Y4E1-5|WAC2C_HUMAN, sp|Q9Y4E1-6|WAC2C_HUMAN, sp|Q9Y4E1|WAC2C_HUMAN	1	0	MS/MS	STY:79.9663@AGNS(1.0000)DS(1.0000)EEDDANGR;
AGPDLPSLPSHALEDEGWAAAAPSPGSAR	AGPDLPSLPSHALEDEGWAAAAPS[79.9663]PGSAR	K	S	269	297	29	3	24S(79.9663)	sp|Q9H3Q1|BORG4_HUMAN	Q9H3Q1	BORG4_HUMAN	CDC42EP4	Cdc42 effector protein 4		sp|Q9H3Q1-2|BORG4_HUMAN	1	4.6065732E7	MS/MS	STY:79.9663@AGPDLPS(0.1126)LPS(0.1126)HALEDEGWAAAAPS(0.7538)PGS(0.0210)AR;
AGPDLPSLPSHALEDEGWAAAAPSPGSAR	AGPDLPSLPSHALEDEGWAAAAPS[79.9663]PGS[79.9663]AR	K	S	269	297	29	3	24S(79.9663),27S(79.9663)	sp|Q9H3Q1|BORG4_HUMAN	Q9H3Q1	BORG4_HUMAN	CDC42EP4	Cdc42 effector protein 4		sp|Q9H3Q1-2|BORG4_HUMAN	1	0	MS/MS	STY:79.9663@AGPDLPS(0.1061)LPS(0.1251)HALEDEGWAAAAPS(0.8837)PGS(0.8851)AR;
AGPDLPSLPSHALEDEGWAAAAPSPGSAR	AGPDLPSLPS[79.9663]HALEDEGWAAAAPS[79.9663]PGSAR	K	S	269	297	29	3	10S(79.9663),24S(79.9663)	sp|Q9H3Q1|BORG4_HUMAN	Q9H3Q1	BORG4_HUMAN	CDC42EP4	Cdc42 effector protein 4		sp|Q9H3Q1-2|BORG4_HUMAN	1	0	MS/MS	STY:79.9663@AGPDLPS(0.0759)LPS(0.7044)HALEDEGWAAAAPS(0.6950)PGS(0.5247)AR;
AGPTLTDENGDDLGLPPSPGDTSYYQDQVDDFHEAR	AGPTLTDENGDDLGLPPSPGDTSY[79.9663]YQDQVDDFHEAR	K	S	20	55	36	4	24Y(79.9663)	sp|Q9NQZ2|SAS10_HUMAN	Q9NQZ2	SAS10_HUMAN	UTP3	Something about silencing protein 10			1	0	MS/MS	STY:79.9663@AGPT(0.1775)LT(0.2187)DENGDDLGLPPS(0.0059)PGDT(0.0099)S(0.0155)Y(0.2863)Y(0.2863)QDQVDDFHEAR;
AGPTLTDENGDDLGLPPSPGDTSYYQDQVDDFHEAR	AGPTLTDENGDDLGLPPSPGDTS[79.9663]YYQDQVDDFHEAR	K	S	20	55	36	3	23S(79.9663)	sp|Q9NQZ2|SAS10_HUMAN	Q9NQZ2	SAS10_HUMAN	UTP3	Something about silencing protein 10			1	0	MS/MS	STY:79.9663@AGPT(0.1436)LT(0.1436)DENGDDLGLPPS(0.0353)PGDT(0.0240)S(0.6389)Y(0.0075)Y(0.0071)QDQVDDFHEAR;
AGPTLTDENGDDLGLPPSPGDTSYYQDQVDDFHEAR	AGPTLTDENGDDLGLPPSPGDT[79.9663]SYYQDQVDDFHEAR	K	S	20	55	36	3	22T(79.9663)	sp|Q9NQZ2|SAS10_HUMAN	Q9NQZ2	SAS10_HUMAN	UTP3	Something about silencing protein 10			1	0	MS/MS	STY:79.9663@AGPT(0.0636)LT(0.0636)DENGDDLGLPPS(0.0103)PGDT(0.2858)S(0.2858)Y(0.2858)Y(0.0051)QDQVDDFHEAR;
AGPTLTDENGDDLGLPPSPGDTSYYQDQVDDFHEAR	AGPTLTDENGDDLGLPPS[79.9663]PGDTSYYQDQVDDFHEAR	K	S	20	55	36	3,4	18S(79.9663)	sp|Q9NQZ2|SAS10_HUMAN	Q9NQZ2	SAS10_HUMAN	UTP3	Something about silencing protein 10			4	6.9917312E7	MS/MS	STY:79.9663@AGPT(0.0221)LT(0.0099)DENGDDLGLPPS(0.2549)PGDT(0.2008)S(0.2008)Y(0.1558)Y(0.1558)QDQVDDFHEAR;
AGPTLTDENGDDLGLPPSPGDTSYYQDQVDDFHEAR	AGPTLT[79.9663]DENGDDLGLPPSPGDTSYYQDQVDDFHEAR	K	S	20	55	36	3	6T(79.9663)	sp|Q9NQZ2|SAS10_HUMAN	Q9NQZ2	SAS10_HUMAN	UTP3	Something about silencing protein 10			1	0	MS/MS	STY:79.9663@AGPT(0.0244)LT(0.7914)DENGDDLGLPPS(0.0096)PGDT(0.0267)S(0.0267)Y(0.0267)Y(0.0944)QDQVDDFHEAR;
AGPTLTDENGDDLGLPPSPGDTSYYQDQVDDFHEAR	AGPT[79.9663]LTDENGDDLGLPPSPGDTSYYQDQVDDFHEAR	K	S	20	55	36	3	4T(79.9663)	sp|Q9NQZ2|SAS10_HUMAN	Q9NQZ2	SAS10_HUMAN	UTP3	Something about silencing protein 10			3	8.2226408E7	MS/MS	STY:79.9663@AGPT(0.4331)LT(0.4331)DENGDDLGLPPS(0.0281)PGDT(0.0270)S(0.0270)Y(0.0258)Y(0.0258)QDQVDDFHEAR;
AGSNEDPILAPSGTPPPTIPPDETFGGR	AGSNEDPILAPSGTPPPTIPPDET[79.9663]FGGR	R	V	732	759	28	3	24T(79.9663)	sp|Q8IZL8|PELP1_HUMAN	Q8IZL8	PELP1_HUMAN	PELP1	Proline-, glutamic acid- and leucine-rich protein 1			2	0	MS/MS	STY:79.9663@AGS(0.0200)NEDPILAPS(0.0419)GT(0.0144)PPPT(0.0250)IPPDET(0.8986)FGGR;
AGSNEDPILAPSGTPPPTIPPDETFGGR	AGSNEDPILAPSGT[79.9663]PPPTIPPDETFGGR	R	V	732	759	28	3	14T(79.9663)	sp|Q8IZL8|PELP1_HUMAN	Q8IZL8	PELP1_HUMAN	PELP1	Proline-, glutamic acid- and leucine-rich protein 1			4	3.2820768E8	MS/MS	STY:79.9663@AGS(0.0144)NEDPILAPS(0.1240)GT(0.8307)PPPT(0.0157)IPPDET(0.0153)FGGR;
AGSNEDPILAPSGTPPPTIPPDETFGGR	AGSNEDPILAPS[79.9663]GTPPPTIPPDETFGGR	R	V	732	759	28	3	12S(79.9663)	sp|Q8IZL8|PELP1_HUMAN	Q8IZL8	PELP1_HUMAN	PELP1	Proline-, glutamic acid- and leucine-rich protein 1			10	3.2820768E8	MS/MS	STY:79.9663@AGS(0.0186)NEDPILAPS(0.9286)GT(0.0196)PPPT(0.0181)IPPDET(0.0151)FGGR;
AGSSAAGASGWTSAGSLNSVPTNSAQQGHNSPDSPVTSAAK	AGSSAAGASGWTSAGSLNSVPTNSAQQGHNS[79.9663]PDSPVTSAAK	K	G	721	761	41	3	31S(79.9663)	sp|Q86XP3|DDX42_HUMAN	Q86XP3	DDX42_HUMAN	DDX42	ATP-dependent RNA helicase DDX42		sp|Q86XP3-2|DDX42_HUMAN	1	1.2722244E7	MS/MS	STY:79.9663@AGS(0.0063)S(0.0063)AAGAS(0.0757)GWT(0.0757)S(0.0757)AGS(0.0757)LNS(0.0113)VPT(0.0034)NS(0.0036)AQQGHNS(0.1665)PDS(0.1665)PVT(0.1665)S(0.1665)AAK;
AGSSASSPPSASSSPHPSAAVPAADPADSASGSSNK	AGSSASSPPSASSSPHPS[79.9663]AAVPAADPADSASGSSNK	R	R	43	78	36	3	18S(79.9663)	sp|Q8NDF8-2|PAPD5_HUMAN	Q8NDF8-2	PAPD5_HUMAN	TENT4B	Isoform 2 of Terminal nucleotidyltransferase 4B		sp|Q8NDF8-3|PAPD5_HUMAN, sp|Q8NDF8-4|PAPD5_HUMAN, sp|Q8NDF8-5|PAPD5_HUMAN, sp|Q8NDF8|PAPD5_HUMAN	1	0	MS/MS	STY:79.9663@AGS(0.0043)S(0.0489)AS(0.0489)S(0.0489)PPS(0.0489)AS(0.0489)S(0.0489)S(0.0489)PHPS(0.5311)AAVPAADPADS(0.0427)AS(0.0303)GS(0.0303)S(0.0188)NK;
AGSSASSPPSASSSPHPSAAVPAADPADSASGSSNK	AGSSASSPPSASS[79.9663]SPHPSAAVPAADPADSASGSSNK	R	R	43	78	36	3	13S(79.9663)	sp|Q8NDF8-2|PAPD5_HUMAN	Q8NDF8-2	PAPD5_HUMAN	TENT4B	Isoform 2 of Terminal nucleotidyltransferase 4B		sp|Q8NDF8-3|PAPD5_HUMAN, sp|Q8NDF8-4|PAPD5_HUMAN, sp|Q8NDF8-5|PAPD5_HUMAN, sp|Q8NDF8|PAPD5_HUMAN	1	3.0407952E7	MS/MS	STY:79.9663@AGS(0.0073)S(0.0073)AS(0.0073)S(0.0073)PPS(0.0073)AS(0.0073)S(0.4574)S(0.4574)PHPS(0.0069)AAVPAADPADS(0.0090)AS(0.0084)GS(0.0084)S(0.0084)NK;
AGSSASSPPSASSSPHPSAAVPAADPADSASGSSNK	AGSS[79.9663]ASSPPSASSSPHPSAAVPAADPADSASGSSNK	R	R	43	78	36	3	4S(79.9663)	sp|Q8NDF8-2|PAPD5_HUMAN	Q8NDF8-2	PAPD5_HUMAN	TENT4B	Isoform 2 of Terminal nucleotidyltransferase 4B		sp|Q8NDF8-3|PAPD5_HUMAN, sp|Q8NDF8-4|PAPD5_HUMAN, sp|Q8NDF8-5|PAPD5_HUMAN, sp|Q8NDF8|PAPD5_HUMAN	1	3.0407952E7	MS/MS	STY:79.9663@AGS(0.0037)S(0.3156)AS(0.3156)S(0.3156)PPS(0.0040)AS(0.0040)S(0.0040)S(0.0040)PHPS(0.0062)AAVPAADPADS(0.0070)AS(0.0067)GS(0.0067)S(0.0067)NK;
AGSNEDPILAPSGTPPPTIPPDETFGGR	AGS[79.9663]NEDPILAPSGTPPPT[79.9663]IPPDETFGGR	R	V	732	759	28	3	18T(79.9663),3S(79.9663)	sp|Q8IZL8|PELP1_HUMAN	Q8IZL8	PELP1_HUMAN	PELP1	Proline-, glutamic acid- and leucine-rich protein 1			1	4.3387088E7	MS/MS	STY:79.9663@AGS(0.8014)NEDPILAPS(0.0324)GT(0.3144)PPPT(0.8190)IPPDET(0.0328)FGGR;
AGSPLCNSNLQDSEEDIEPSYSLFR	AGS[79.9663]PLC[57.0215]NSNLQDSEEDIEPSYSLFR	R	E	973	997	25	3	3S(79.9663),6C(57.0215)	sp|Q9NRY4|RHG35_HUMAN	Q9NRY4	RHG35_HUMAN	ARHGAP35	Rho GTPase-activating protein 35			1	0	MS/MS	STY:79.9663@AGS(0.8290)PLCNS(0.0583)NLQDS(0.0652)EEDIEPS(0.0159)Y(0.0159)S(0.0159)LFR;
AGSPLCNSNLQDSEEDIEPSYSLFR	AGS[79.9663]PLC[57.0215]NSNLQDS[79.9663]EEDIEPSYSLFR	R	E	973	997	25	3	13S(79.9663),3S(79.9663),6C(57.0215)	sp|Q9NRY4|RHG35_HUMAN	Q9NRY4	RHG35_HUMAN	ARHGAP35	Rho GTPase-activating protein 35			1	0	MS/MS	STY:79.9663@AGS(0.5286)PLCNS(0.5286)NLQDS(0.6425)EEDIEPS(0.0901)Y(0.0901)S(0.1202)LFR;
AGSSASSPPSASSSPHPSAAVPAADPADSASGSSNK	AGS[79.9663]SASSPPSASSSPHPSAAVPAADPADSASGSSNK	R	R	43	78	36	3	3S(79.9663)	sp|Q8NDF8-2|PAPD5_HUMAN	Q8NDF8-2	PAPD5_HUMAN	TENT4B	Isoform 2 of Terminal nucleotidyltransferase 4B		sp|Q8NDF8-3|PAPD5_HUMAN, sp|Q8NDF8-4|PAPD5_HUMAN, sp|Q8NDF8-5|PAPD5_HUMAN, sp|Q8NDF8|PAPD5_HUMAN	1	1.2003414E7	MS/MS	STY:79.9663@AGS(0.1224)S(0.1224)AS(0.1224)S(0.1224)PPS(0.1224)AS(0.1224)S(0.1224)S(0.1224)PHPS(0.0133)AAVPAADPADS(0.0020)AS(0.0020)GS(0.0020)S(0.0020)NK;
AGSSPAQGAQNEPPR	AGS[79.9663]SPAQGAQNEPPR	K	L	556	570	15	2	3S(79.9663)	sp|Q9UGU0-2|TCF20_HUMAN	Q9UGU0-2	TCF20_HUMAN	TCF20	Isoform 2 of Transcription factor 20		sp|Q9UGU0|TCF20_HUMAN	2	6.2265928E7	MS/MS	STY:79.9663@AGS(0.5000)S(0.5000)PAQGAQNEPPR;
AGSSTPGDAPPAVAEVQGR	AGS[79.9663]STPGDAPPAVAEVQGR	R	S	2885	2903	19	2,3	3S(79.9663)	sp|Q7Z6Z7-2|HUWE1_HUMAN	Q7Z6Z7-2	HUWE1_HUMAN	HUWE1	Isoform 2 of E3 ubiquitin-protein ligase HUWE1		sp|Q7Z6Z7-3|HUWE1_HUMAN, sp|Q7Z6Z7|HUWE1_HUMAN	5	8.226264E7	MS/MS	STY:79.9663@AGS(0.9179)S(0.0410)T(0.0410)PGDAPPAVAEVQGR;
AGSSTPGDAPPAVAEVQGR	AGS[79.9663]S[79.9663]TPGDAPPAVAEVQGR	R	S	2885	2903	19	2	3S(79.9663),4S(79.9663)	sp|Q7Z6Z7-2|HUWE1_HUMAN	Q7Z6Z7-2	HUWE1_HUMAN	HUWE1	Isoform 2 of E3 ubiquitin-protein ligase HUWE1		sp|Q7Z6Z7-3|HUWE1_HUMAN, sp|Q7Z6Z7|HUWE1_HUMAN	3	4.869788E7	MS/MS	STY:79.9663@AGS(0.6667)S(0.6667)T(0.6667)PGDAPPAVAEVQGR;
AGTATSPAGSSPAVAGGTQR	AGTATSPAGSSPAVAGGT[79.9663]QR	K	P	669	688	20	2	18T(79.9663)	sp|Q13428-4|TCOF_HUMAN	Q13428-4	TCOF_HUMAN	TCOF1	Isoform 4 of Treacle protein		sp|Q13428-2|TCOF_HUMAN, sp|Q13428-3|TCOF_HUMAN, sp|Q13428-5|TCOF_HUMAN, sp|Q13428-6|TCOF_HUMAN, sp|Q13428-7|TCOF_HUMAN, sp|Q13428-8|TCOF_HUMAN, sp|Q13428|TCOF_HUMAN	2	6.1758448E7	MS/MS	STY:79.9663@AGT(0.0223)AT(0.0292)S(0.2791)PAGS(0.0917)S(0.0917)PAVAGGT(0.4861)QR;
AGTATSPAGSSPAVAGGTQR	AGTATSPAGS[79.9663]S[79.9663]PAVAGGTQR	K	P	669	688	20	2	10S(79.9663),11S(79.9663)	sp|Q13428-4|TCOF_HUMAN	Q13428-4	TCOF_HUMAN	TCOF1	Isoform 4 of Treacle protein		sp|Q13428-2|TCOF_HUMAN, sp|Q13428-3|TCOF_HUMAN, sp|Q13428-5|TCOF_HUMAN, sp|Q13428-6|TCOF_HUMAN, sp|Q13428-7|TCOF_HUMAN, sp|Q13428-8|TCOF_HUMAN, sp|Q13428|TCOF_HUMAN	1	3.7824352E7	MS/MS	STY:79.9663@AGT(0.2135)AT(0.3467)S(0.3467)PAGS(0.5371)S(0.5371)PAVAGGT(0.0188)QR;
AGTATSPAGSSPAVAGGTQR	AGTATS[79.9663]PAGSSPAVAGGTQR	K	P	669	688	20	2	6S(79.9663)	sp|Q13428-4|TCOF_HUMAN	Q13428-4	TCOF_HUMAN	TCOF1	Isoform 4 of Treacle protein		sp|Q13428-2|TCOF_HUMAN, sp|Q13428-3|TCOF_HUMAN, sp|Q13428-5|TCOF_HUMAN, sp|Q13428-6|TCOF_HUMAN, sp|Q13428-7|TCOF_HUMAN, sp|Q13428-8|TCOF_HUMAN, sp|Q13428|TCOF_HUMAN	1	6.1758448E7	MS/MS	STY:79.9663@AGT(0.0608)AT(0.0608)S(0.7702)PAGS(0.0236)S(0.0236)PAVAGGT(0.0610)QR;
AGTATSPAGSSPAVAGGTQR	AGTAT[79.9663]SPAGSSPAVAGGTQR	K	P	669	688	20	2	5T(79.9663)	sp|Q13428-4|TCOF_HUMAN	Q13428-4	TCOF_HUMAN	TCOF1	Isoform 4 of Treacle protein		sp|Q13428-2|TCOF_HUMAN, sp|Q13428-3|TCOF_HUMAN, sp|Q13428-5|TCOF_HUMAN, sp|Q13428-6|TCOF_HUMAN, sp|Q13428-7|TCOF_HUMAN, sp|Q13428-8|TCOF_HUMAN, sp|Q13428|TCOF_HUMAN	3	6.1758448E7	MS/MS	STY:79.9663@AGT(0.0092)AT(0.4811)S(0.4811)PAGS(0.0094)S(0.0093)PAVAGGT(0.0099)QR;
AGTATSPAGSSPAVAGGTQR	AGTAT[79.9663]SPAGSSPAVAGGT[79.9663]QR	K	P	669	688	20	2	18T(79.9663),5T(79.9663)	sp|Q13428-4|TCOF_HUMAN	Q13428-4	TCOF_HUMAN	TCOF1	Isoform 4 of Treacle protein		sp|Q13428-2|TCOF_HUMAN, sp|Q13428-3|TCOF_HUMAN, sp|Q13428-5|TCOF_HUMAN, sp|Q13428-6|TCOF_HUMAN, sp|Q13428-7|TCOF_HUMAN, sp|Q13428-8|TCOF_HUMAN, sp|Q13428|TCOF_HUMAN	1	3.7824352E7	MS/MS	STY:79.9663@AGT(0.0676)AT(0.5857)S(0.5857)PAGS(0.0234)S(0.0261)PAVAGGT(0.7115)QR;
AGTATSPAGSSPAVAGGTQR	AGTAT[79.9663]SPAGSS[79.9663]PAVAGGTQR	K	P	669	688	20	2	11S(79.9663),5T(79.9663)	sp|Q13428-4|TCOF_HUMAN	Q13428-4	TCOF_HUMAN	TCOF1	Isoform 4 of Treacle protein		sp|Q13428-2|TCOF_HUMAN, sp|Q13428-3|TCOF_HUMAN, sp|Q13428-5|TCOF_HUMAN, sp|Q13428-6|TCOF_HUMAN, sp|Q13428-7|TCOF_HUMAN, sp|Q13428-8|TCOF_HUMAN, sp|Q13428|TCOF_HUMAN	1	3.7824352E7	MS/MS	STY:79.9663@AGT(0.0223)AT(0.6013)S(0.6013)PAGS(0.0224)S(0.7310)PAVAGGT(0.0217)QR;
AGTATSPAGSSPAVAGGTQR	AGT[79.9663]ATSPAGSSPAVAGGTQR	K	P	669	688	20	2,3	3T(79.9663)	sp|Q13428-4|TCOF_HUMAN	Q13428-4	TCOF_HUMAN	TCOF1	Isoform 4 of Treacle protein		sp|Q13428-2|TCOF_HUMAN, sp|Q13428-3|TCOF_HUMAN, sp|Q13428-5|TCOF_HUMAN, sp|Q13428-6|TCOF_HUMAN, sp|Q13428-7|TCOF_HUMAN, sp|Q13428-8|TCOF_HUMAN, sp|Q13428|TCOF_HUMAN	3	7.1030416E7	MS/MS	STY:79.9663@AGT(0.3251)AT(0.3251)S(0.3251)PAGS(0.0089)S(0.0079)PAVAGGT(0.0078)QR;
AGTATSPAGSSPAVAGGTQR	AGT[79.9663]ATSPAGS[79.9663]SPAVAGGTQR	K	P	669	688	20	2	10S(79.9663),3T(79.9663)	sp|Q13428-4|TCOF_HUMAN	Q13428-4	TCOF_HUMAN	TCOF1	Isoform 4 of Treacle protein		sp|Q13428-2|TCOF_HUMAN, sp|Q13428-3|TCOF_HUMAN, sp|Q13428-5|TCOF_HUMAN, sp|Q13428-6|TCOF_HUMAN, sp|Q13428-7|TCOF_HUMAN, sp|Q13428-8|TCOF_HUMAN, sp|Q13428|TCOF_HUMAN	1	3.7824352E7	MS/MS	STY:79.9663@AGT(0.8823)AT(0.0522)S(0.0522)PAGS(0.8797)S(0.0777)PAVAGGT(0.0559)QR;
AGYLSDGDSPERPAGPPSPTSFR	AGY[79.9663]LS[79.9663]DGDSPERPAGPPS[79.9663]PTSFR	R	P	227	249	23	3	18S(79.9663),3Y(79.9663),5S(79.9663)	sp|Q6ZW31|SYDE1_HUMAN	Q6ZW31	SYDE1_HUMAN	SYDE1	Rho GTPase-activating protein SYDE1		sp|Q6ZW31-2|SYDE1_HUMAN	1	2.413936E7	MS/MS	STY:79.9663@AGY(0.7568)LS(0.7801)DGDS(0.5684)PERPAGPPS(0.7825)PT(0.0561)S(0.0561)FR;
AHEEQDEESQDNLFSSDR	AHEEQDEES[79.9663]QDNLFSSDR	K	A	1284	1301	18	3	9S(79.9663)	sp|Q15058|KIF14_HUMAN	Q15058	KIF14_HUMAN	KIF14	Kinesin-like protein KIF14			1	0	MS/MS	STY:79.9663@AHEEQDEES(0.7037)QDNLFS(0.1482)S(0.1482)DR;
AHSSPASLQLGAVSPGTLTPTGVVSGPAATPTAQHLR	AHSSPASLQLGAVS[79.9663]PGT[79.9663]LTPTGVVSGPAATPTAQHLR	R	Q	125	161	37	3	14S(79.9663),17T(79.9663)	sp|P46937-2|YAP1_HUMAN	P46937-2	YAP1_HUMAN	YAP1	Isoform 2 of Transcriptional coactivator YAP1		sp|P46937-3|YAP1_HUMAN, sp|P46937-5|YAP1_HUMAN, sp|P46937-6|YAP1_HUMAN, sp|P46937-7|YAP1_HUMAN, sp|P46937-8|YAP1_HUMAN, sp|P46937-9|YAP1_HUMAN, sp|P46937|YAP1_HUMAN	2	0	MS/MS	STY:79.9663@AHS(0.1141)S(0.1141)PAS(0.2100)LQLGAVS(0.5505)PGT(0.3856)LT(0.3856)PT(0.0235)GVVS(0.0162)GPAAT(0.1001)PT(0.1001)AQHLR;
AHSSPASLQLGAVSPGTLTPTGVVSGPAATPTAQHLR	AHSSPAS[79.9663]LQLGAVS[79.9663]PGTLTPTGVVSGPAATPTAQHLR	R	Q	125	161	37	3	14S(79.9663),7S(79.9663)	sp|P46937-2|YAP1_HUMAN	P46937-2	YAP1_HUMAN	YAP1	Isoform 2 of Transcriptional coactivator YAP1		sp|P46937-3|YAP1_HUMAN, sp|P46937-5|YAP1_HUMAN, sp|P46937-6|YAP1_HUMAN, sp|P46937-7|YAP1_HUMAN, sp|P46937-8|YAP1_HUMAN, sp|P46937-9|YAP1_HUMAN, sp|P46937|YAP1_HUMAN	1	0	MS/MS	STY:79.9663@AHS(0.0151)S(0.0151)PAS(0.7504)LQLGAVS(0.7505)PGT(0.0148)LT(0.0123)PT(0.0116)GVVS(0.0898)GPAAT(0.1701)PT(0.1701)AQHLR;
AHSSPASLQLGAVSPGTLTPTGVVSGPAATPTAQHLR	AHSS[79.9663]PASLQLGAVSPGTLTPTGVVSGPAATPTAQHLR	R	Q	125	161	37	3	4S(79.9663)	sp|P46937-2|YAP1_HUMAN	P46937-2	YAP1_HUMAN	YAP1	Isoform 2 of Transcriptional coactivator YAP1		sp|P46937-3|YAP1_HUMAN, sp|P46937-5|YAP1_HUMAN, sp|P46937-6|YAP1_HUMAN, sp|P46937-7|YAP1_HUMAN, sp|P46937-8|YAP1_HUMAN, sp|P46937-9|YAP1_HUMAN, sp|P46937|YAP1_HUMAN	1	1.3438141E7	MS/MS	STY:79.9663@AHS(0.0228)S(0.5704)PAS(0.1048)LQLGAVS(0.1048)PGT(0.0236)LT(0.0236)PT(0.0176)GVVS(0.0237)GPAAT(0.0544)PT(0.0544)AQHLR;
AHSPAEGASVESSSPGPK	AHS[79.9663]PAEGASVESSSPGPK	R	K	60	77	18	2	3S(79.9663)	sp|Q8NFG4-2|FLCN_HUMAN	Q8NFG4-2	FLCN_HUMAN	FLCN	Isoform 2 of Folliculin		sp|Q8NFG4-3|FLCN_HUMAN, sp|Q8NFG4|FLCN_HUMAN	2	0	MS/MS	STY:79.9663@AHS(0.9427)PAEGAS(0.0146)VES(0.0142)S(0.0142)S(0.0142)PGPK;
AHSPAEGASVESSSPGPK	AHS[79.9663]PAEGASVESS[79.9663]SPGPK	R	K	60	77	18	3	13S(79.9663),3S(79.9663)	sp|Q8NFG4-2|FLCN_HUMAN	Q8NFG4-2	FLCN_HUMAN	FLCN	Isoform 2 of Folliculin		sp|Q8NFG4-3|FLCN_HUMAN, sp|Q8NFG4|FLCN_HUMAN	1	5252865	MS/MS	STY:79.9663@AHS(0.5440)PAEGAS(0.2472)VES(0.2472)S(0.4808)S(0.4808)PGPK;
AHSPAEGASVESSSPGPK	AHS[79.9663]PAEGASVES[79.9663]SSPGPK	R	K	60	77	18	2	12S(79.9663),3S(79.9663)	sp|Q8NFG4-2|FLCN_HUMAN	Q8NFG4-2	FLCN_HUMAN	FLCN	Isoform 2 of Folliculin		sp|Q8NFG4-3|FLCN_HUMAN, sp|Q8NFG4|FLCN_HUMAN	1	0	MS/MS	STY:79.9663@AHS(0.5398)PAEGAS(0.0544)VES(0.4686)S(0.4686)S(0.4686)PGPK;
AHSSPASLQLGAVSPGTLTPTGVVSGPAATPTAQHLR	AHS[79.9663]S[79.9663]PASLQLGAVSPGTLTPTGVVSGPAATPTAQHLR	R	Q	125	161	37	3	3S(79.9663),4S(79.9663)	sp|P46937-2|YAP1_HUMAN	P46937-2	YAP1_HUMAN	YAP1	Isoform 2 of Transcriptional coactivator YAP1		sp|P46937-3|YAP1_HUMAN, sp|P46937-5|YAP1_HUMAN, sp|P46937-6|YAP1_HUMAN, sp|P46937-7|YAP1_HUMAN, sp|P46937-8|YAP1_HUMAN, sp|P46937-9|YAP1_HUMAN, sp|P46937|YAP1_HUMAN	1	0	MS/MS	STY:79.9663@AHS(0.3274)S(0.3274)PAS(0.3274)LQLGAVS(0.3274)PGT(0.3274)LT(0.3274)PT(0.0124)GVVS(0.0072)GPAAT(0.0079)PT(0.0079)AQHLR;
AHTPTPGIYMGR	AHTPT[79.9663]PGIYMGR	R	P	200	211	12	2	5T(79.9663)	sp|Q13595|TRA2A_HUMAN	Q13595	TRA2A_HUMAN	TRA2A	Transformer-2 protein homolog alpha		sp|Q13595-2|TRA2A_HUMAN, sp|Q13595-3|TRA2A_HUMAN, sp|Q13595-4|TRA2A_HUMAN	2	4.456128E7	MS/MS	STY:79.9663@AHT(0.1437)PT(0.7599)PGIY(0.0964)MGR;
AHTVEEVNTDEDQK	AHTVEEVNT[79.9663]DEDQK	R	E	236	249	14	2	9T(79.9663)	sp|Q9BVW5|TIPIN_HUMAN	Q9BVW5	TIPIN_HUMAN	TIPIN	TIMELESS-interacting protein			1	4.3877728E7	MS/MS	STY:79.9663@AHT(0.3737)VEEVNT(0.6263)DEDQK;
AHTPTPGIYMGR	AHT[79.9663]PTPGIYMGR	R	P	200	211	12	2,3	3T(79.9663)	sp|Q13595|TRA2A_HUMAN	Q13595	TRA2A_HUMAN	TRA2A	Transformer-2 protein homolog alpha		sp|Q13595-2|TRA2A_HUMAN, sp|Q13595-3|TRA2A_HUMAN, sp|Q13595-4|TRA2A_HUMAN	7	9.3841008E7	MS/MS	STY:79.9663@AHT(0.9362)PT(0.0271)PGIY(0.0368)MGR;
AHTPTPGIYMGR	AHT[79.9663]PTPGIYM[15.9949]GR	R	P	200	211	12	2	10M(15.9949),3T(79.9663)	sp|Q13595|TRA2A_HUMAN	Q13595	TRA2A_HUMAN	TRA2A	Transformer-2 protein homolog alpha		sp|Q13595-2|TRA2A_HUMAN, sp|Q13595-3|TRA2A_HUMAN, sp|Q13595-4|TRA2A_HUMAN	1	1.3009346E7	MS/MS	M:15.9949@AHTPTPGIYM(1.0000)GR;STY:79.9663@AHT(0.6300)PT(0.0291)PGIY(0.3410)MGR;
AIGGIILTASHNPGGPNGDFGIK	AIGGIILT[79.9663]ASHNPGGPNGDFGIK	K	F	126	148	23	3	8T(79.9663)	sp|P36871-2|PGM1_HUMAN	P36871-2	PGM1_HUMAN	PGM1	Isoform 2 of Phosphoglucomutase-1		sp|P36871|PGM1_HUMAN	10	9.7185696E7	MS/MS	STY:79.9663@AIGGIILT(0.9356)AS(0.0644)HNPGGPNGDFGIK;
AIGSGESETPPSTPTAQEPSSSGGFEFFR	AIGS[79.9663]GES[79.9663]ETPPSTPTAQEPSSSGGFEFFR	K	N	947	975	29	3	4S(79.9663),7S(79.9663)	sp|Q4ADV7-3|RIC1_HUMAN	Q4ADV7-3	RIC1_HUMAN	RIC1	Isoform 3 of Guanine nucleotide exchange factor subunit RIC1		sp|Q4ADV7-2|RIC1_HUMAN, sp|Q4ADV7|RIC1_HUMAN	1	0	MS/MS	STY:79.9663@AIGS(0.4805)GES(0.4610)ET(0.2691)PPS(0.2691)T(0.0684)PT(0.3136)AQEPS(0.0461)S(0.0461)S(0.0461)GGFEFFR;
AIHSSDEDEDEDDEEDFEDDDEWED	AIHS[79.9663]S[79.9663]DEDEDEDDEEDFEDDDEWED	K	-	481	505	25	3	4S(79.9663),5S(79.9663)	sp|O00401|WASL_HUMAN	O00401	WASL_HUMAN	WASL	Actin nucleation-promoting factor WASL			2	8.196864E7	MS/MS	STY:79.9663@AIHS(1.0000)S(1.0000)DEDEDEDDEEDFEDDDEWED;
AIPELDAYEAEGLALDDEDVEELTASQR	AIPELDAYEAEGLALDDEDVEELT[79.9663]ASQR	R	E	83	110	28	3	24T(79.9663)	sp|P49736|MCM2_HUMAN	P49736	MCM2_HUMAN	MCM2	DNA replication licensing factor MCM2			2	1.02191328E8	MS/MS	STY:79.9663@AIPELDAY(0.3121)EAEGLALDDEDVEELT(0.6675)AS(0.0204)QR;
AIPGDQHPESPVHTEPMGIQGR	AIPGDQHPESPVHT[79.9663]EPMGIQGR	R	G	784	805	22	3	14T(79.9663)	sp|Q14676-3|MDC1_HUMAN	Q14676-3	MDC1_HUMAN	MDC1	Isoform 3 of Mediator of DNA damage checkpoint protein 1		sp|Q14676|MDC1_HUMAN	1	4.4722036E7	MS/MS	STY:79.9663@AIPGDQHPES(0.0693)PVHT(0.9307)EPMGIQGR;
AIPGDQHPESPVHTEPMGIQGR	AIPGDQHPES[79.9663]PVHTEPMGIQGR	R	G	784	805	22	3	10S(79.9663)	sp|Q14676-3|MDC1_HUMAN	Q14676-3	MDC1_HUMAN	MDC1	Isoform 3 of Mediator of DNA damage checkpoint protein 1		sp|Q14676|MDC1_HUMAN	2	0	MS/MS	STY:79.9663@AIPGDQHPES(0.9446)PVHT(0.0554)EPMGIQGR;
AISAPTSPTR	AIS[79.9663]APTSPTR	R	L	53	62	10	2	3S(79.9663)	sp|Q9NQG6|MID51_HUMAN	Q9NQG6	MID51_HUMAN	MIEF1	Mitochondrial dynamics protein MIEF1		sp|Q9NQG6-2|MID51_HUMAN	1	6.01254e+06	MS/MS	STY:79.9663@AIS(0.3303)APT(0.3303)S(0.3303)PT(0.0092)R;
AISAPTSPTR	AIS[79.9663]APT[79.9663]SPTR	R	L	53	62	10	2	3S(79.9663),6T(79.9663)	sp|Q9NQG6|MID51_HUMAN	Q9NQG6	MID51_HUMAN	MIEF1	Mitochondrial dynamics protein MIEF1		sp|Q9NQG6-2|MID51_HUMAN	1	1.4705354E7	MS/MS	STY:79.9663@AIS(0.9419)APT(0.9419)S(0.0631)PT(0.0532)R;
AISSANLLVR	AIS[79.9663]SANLLVR	K	S	174	183	10	2	3S(79.9663)	sp|Q32P44|EMAL3_HUMAN	Q32P44	EMAL3_HUMAN	EML3	Echinoderm microtubule-associated protein-like 3		sp|Q32P44-2|EMAL3_HUMAN	1	3305261	MS/MS	STY:79.9663@AIS(0.5000)S(0.5000)ANLLVR;
AITSLLGGGSPK	AITSLLGGGS[79.9663]PK	K	N	2649	2660	12	2	10S(79.9663)	sp|Q6KC79-2|NIPBL_HUMAN	Q6KC79-2	NIPBL_HUMAN	NIPBL	Isoform 2 of Nipped-B-like protein		sp|Q6KC79|NIPBL_HUMAN	2	4.4979272E7	MS/MS	STY:79.9663@AIT(0.0766)S(0.0766)LLGGGS(0.8467)PK;
AITSLLGGGSPK	AITS[79.9663]LLGGGSPK	K	N	2649	2660	12	2	4S(79.9663)	sp|Q6KC79-2|NIPBL_HUMAN	Q6KC79-2	NIPBL_HUMAN	NIPBL	Isoform 2 of Nipped-B-like protein		sp|Q6KC79|NIPBL_HUMAN	1	0	MS/MS	STY:79.9663@AIT(0.0195)S(0.4941)LLGGGS(0.4864)PK;
AKPVVSDDDSEEEQEEDR	AKPVVS[79.9663]DDDS[79.9663]EEEQEEDR	R	S	1589	1606	18	2,3	10S(79.9663),6S(79.9663)	sp|P51532-2|SMCA4_HUMAN	P51532-2	SMCA4_HUMAN	SMARCA4	Isoform 2 of Transcription activator BRG1		sp|P51532-3|SMCA4_HUMAN, sp|P51532-4|SMCA4_HUMAN, sp|P51532-5|SMCA4_HUMAN, sp|P51532|SMCA4_HUMAN	2	3.4584092E7	MS/MS	STY:79.9663@AKPVVS(1.0000)DDDS(1.0000)EEEQEEDR;
AKPVVSDFDSDEEQDER	AKPVVS[79.9663]DFDSDEEQDER	K	E	1545	1561	17	2	6S(79.9663)	sp|P51531-2|SMCA2_HUMAN	P51531-2	SMCA2_HUMAN	SMARCA2	Isoform Short of Probable global transcription activator SNF2L2		sp|P51531|SMCA2_HUMAN	1	5.06488e+06	MS/MS	STY:79.9663@AKPVVS(0.5000)DFDS(0.5000)DEEQDER;
AKPVVSDFDSDEEQDER	AKPVVS[79.9663]DFDS[79.9663]DEEQDER	K	E	1545	1561	17	2,3	10S(79.9663),6S(79.9663)	sp|P51531-2|SMCA2_HUMAN	P51531-2	SMCA2_HUMAN	SMARCA2	Isoform Short of Probable global transcription activator SNF2L2		sp|P51531|SMCA2_HUMAN	10	2.73744896E8	MS/MS	STY:79.9663@AKPVVS(1.0000)DFDS(1.0000)DEEQDER;
AKSPQPPVEEEDEHFDDTVVCLDTYNCDLHFK	AKSPQPPVEEEDEHFDDT[79.9663]VVC[57.0215]LDTYNC[57.0215]DLHFK	R	I	250	281	32	4	18T(79.9663),21C(57.0215),27C(57.0215)	sp|Q00839-2|HNRPU_HUMAN	Q00839-2	HNRPU_HUMAN	HNRNPU	Isoform 2 of Heterogeneous nuclear ribonucleoprotein U		sp|Q00839|HNRPU_HUMAN	1	0	MS/MS	STY:79.9663@AKS(0.2645)PQPPVEEEDEHFDDT(0.5062)VVCLDT(0.1017)Y(0.1277)NCDLHFK;
AKSPTPSPSPPR	AKSPT[79.9663]PS[79.9663]PS[79.9663]PPR	K	N	789	800	12	2	5T(79.9663),7S(79.9663),9S(79.9663)	sp|Q8IYB3|SRRM1_HUMAN	Q8IYB3	SRRM1_HUMAN	SRRM1	Serine/arginine repetitive matrix protein 1		sp|Q8IYB3-2|SRRM1_HUMAN	1	4.2346032E7	MS/MS	STY:79.9663@AKS(0.3191)PT(0.8933)PS(0.8941)PS(0.8934)PPR;
AKSEDSDVELSD	AKS[79.9663]EDS[79.9663]DVELS[79.9663]D	K	-	1448	1459	12	2	11S(79.9663),3S(79.9663),6S(79.9663)	sp|Q5VZL5-2|ZMYM4_HUMAN	Q5VZL5-2	ZMYM4_HUMAN	ZMYM4	Isoform 2 of Zinc finger MYM-type protein 4		sp|Q5VZL5-3|ZMYM4_HUMAN, sp|Q5VZL5-4|ZMYM4_HUMAN, sp|Q5VZL5|ZMYM4_HUMAN	1	1.1686364E7	MS/MS	STY:79.9663@AKS(1.0000)EDS(1.0000)DVELS(1.0000)D;
AKSPTPDGSER	AKS[79.9663]PTPDGS[79.9663]ER	R	I	144	154	11	2	3S(79.9663),9S(79.9663)	sp|Q96MU7-2|YTDC1_HUMAN	Q96MU7-2	YTDC1_HUMAN	YTHDC1	Isoform 2 of YTH domain-containing protein 1		sp|Q96MU7|YTDC1_HUMAN	1	1.90303952E8	MS/MS	STY:79.9663@AKS(0.9482)PT(0.1038)PDGS(0.9480)ER;
AKSPTPSPSPPR	AKS[79.9663]PTPS[79.9663]PS[79.9663]PPR	K	N	789	800	12	2	3S(79.9663),7S(79.9663),9S(79.9663)	sp|Q8IYB3|SRRM1_HUMAN	Q8IYB3	SRRM1_HUMAN	SRRM1	Serine/arginine repetitive matrix protein 1		sp|Q8IYB3-2|SRRM1_HUMAN	2	4.2346032E7	MS/MS	STY:79.9663@AKS(0.9240)PT(0.2284)PS(0.9238)PS(0.9238)PPR;
AKSPTPDGSER	AKS[79.9663]PT[79.9663]PDGSER	R	I	144	154	11	2	3S(79.9663),5T(79.9663)	sp|Q96MU7-2|YTDC1_HUMAN	Q96MU7-2	YTDC1_HUMAN	YTHDC1	Isoform 2 of YTH domain-containing protein 1		sp|Q96MU7|YTDC1_HUMAN	4	2.0297552E8	MS/MS	STY:79.9663@AKS(0.9490)PT(0.9495)PDGS(0.1015)ER;
AKSPTPSPSPPR	AKS[79.9663]PT[79.9663]PSPS[79.9663]PPR	K	N	789	800	12	2	3S(79.9663),5T(79.9663),9S(79.9663)	sp|Q8IYB3|SRRM1_HUMAN	Q8IYB3	SRRM1_HUMAN	SRRM1	Serine/arginine repetitive matrix protein 1		sp|Q8IYB3-2|SRRM1_HUMAN	2	4.2346032E7	MS/MS	STY:79.9663@AKS(0.9088)PT(0.9088)PS(0.2741)PS(0.9082)PPR;
AKSPTPSPSPPR	AKS[79.9663]PT[79.9663]PS[79.9663]PSPPR	K	N	789	800	12	2	3S(79.9663),5T(79.9663),7S(79.9663)	sp|Q8IYB3|SRRM1_HUMAN	Q8IYB3	SRRM1_HUMAN	SRRM1	Serine/arginine repetitive matrix protein 1		sp|Q8IYB3-2|SRRM1_HUMAN	1	4.2346032E7	MS/MS	STY:79.9663@AKS(0.7633)PT(0.7633)PS(0.7367)PS(0.7367)PPR;
AKTQTPPVSPAPQPTEER	AKTQT[79.9663]PPVS[79.9663]PAPQPT[79.9663]EER	R	L	397	414	18	3	15T(79.9663),5T(79.9663),9S(79.9663)	sp|Q14247|SRC8_HUMAN	Q14247	SRC8_HUMAN	CTTN	Src substrate cortactin		sp|Q14247-2|SRC8_HUMAN, sp|Q14247-3|SRC8_HUMAN	1	0	MS/MS	STY:79.9663@AKT(0.4418)QT(0.8533)PPVS(0.8533)PAPQPT(0.8516)EER;
AKTQTPPVSPAPQPTEER	AKT[79.9663]QT[79.9663]PPVSPAPQPTEER	R	L	397	414	18	3	3T(79.9663),5T(79.9663)	sp|Q14247|SRC8_HUMAN	Q14247	SRC8_HUMAN	CTTN	Src substrate cortactin		sp|Q14247-2|SRC8_HUMAN, sp|Q14247-3|SRC8_HUMAN	1	4.7936e+06	MS/MS	STY:79.9663@AKT(0.5136)QT(0.5136)PPVS(0.5136)PAPQPT(0.4592)EER;
ALAAGADSPK	ALAAGADS[79.9663]PK	R	T	125	134	10	2	8S(79.9663)	sp|Q4KMP7|TB10B_HUMAN	Q4KMP7	TB10B_HUMAN	TBC1D10B	TBC1 domain family member 10B			1	1.4257057E7	MS/MS	STY:79.9663@ALAAGADS(1.0000)PK;
ALAEEASEEELPSDVDLNDPYFAEEVK	ALAEEAS[79.9663]EEELPS[79.9663]DVDLNDPYFAEEVK	K	Q	651	677	27	3	13S(79.9663),7S(79.9663)	sp|Q9H501|ESF1_HUMAN	Q9H501	ESF1_HUMAN	ESF1	ESF1 homolog			3	3.046112E8	MS/MS	STY:79.9663@ALAEEAS(0.9339)EEELPS(0.9341)DVDLNDPY(0.1321)FAEEVK;
ALDISLSSGEEDEGDEEDSTAGTTK	ALDISLS[79.9663]S[79.9663]GEEDEGDEEDSTAGTTK	K	Q	329	353	25	3	7S(79.9663),8S(79.9663)	sp|Q8IY81|SPB1_HUMAN	Q8IY81	SPB1_HUMAN	FTSJ3	pre-rRNA 2'-O-ribose RNA methyltransferase FTSJ3			2	3.92844928E8	MS/MS	STY:79.9663@ALDIS(0.0224)LS(0.8444)S(0.8444)GEEDEGDEEDS(0.0533)T(0.0587)AGT(0.0884)T(0.0884)K;
ALDISLSSGEEDEGDEEDSTAGTTK	ALDIS[79.9663]LSSGEEDEGDEEDSTAGT[79.9663]TK	K	Q	329	353	25	3	23T(79.9663),5S(79.9663)	sp|Q8IY81|SPB1_HUMAN	Q8IY81	SPB1_HUMAN	FTSJ3	pre-rRNA 2'-O-ribose RNA methyltransferase FTSJ3			1	0	MS/MS	STY:79.9663@ALDIS(0.8893)LS(0.0435)S(0.0435)GEEDEGDEEDS(0.0290)T(0.0290)AGT(0.8835)T(0.0822)K;
ALDISLSSGEEDEGDEEDSTAGTTK	ALDIS[79.9663]LSSGEEDEGDEEDS[79.9663]T[79.9663]AGTTK	K	Q	329	353	25	3	19S(79.9663),20T(79.9663),5S(79.9663)	sp|Q8IY81|SPB1_HUMAN	Q8IY81	SPB1_HUMAN	FTSJ3	pre-rRNA 2'-O-ribose RNA methyltransferase FTSJ3			1	0	MS/MS	STY:79.9663@ALDIS(0.4882)LS(0.4181)S(0.4181)GEEDEGDEEDS(0.4350)T(0.4350)AGT(0.4028)T(0.4028)K;
ALDISLSSGEEDEGDEEDSTAGTTK	ALDIS[79.9663]LSS[79.9663]GEEDEGDEEDSTAGTTK	K	Q	329	353	25	3	5S(79.9663),8S(79.9663)	sp|Q8IY81|SPB1_HUMAN	Q8IY81	SPB1_HUMAN	FTSJ3	pre-rRNA 2'-O-ribose RNA methyltransferase FTSJ3			1	0	MS/MS	STY:79.9663@ALDIS(0.5502)LS(0.5502)S(0.6917)GEEDEGDEEDS(0.0585)T(0.0585)AGT(0.0475)T(0.0433)K;
ALDISLSSGEEDEGDEEDSTAGTTK	ALDIS[79.9663]LS[79.9663]SGEEDEGDEEDSTAGTTK	K	Q	329	353	25	3	5S(79.9663),7S(79.9663)	sp|Q8IY81|SPB1_HUMAN	Q8IY81	SPB1_HUMAN	FTSJ3	pre-rRNA 2'-O-ribose RNA methyltransferase FTSJ3			4	3.92844928E8	MS/MS	STY:79.9663@ALDIS(0.8707)LS(0.8707)S(0.0251)GEEDEGDEEDS(0.0783)T(0.0517)AGT(0.0517)T(0.0517)K;
ALDISLSSGEEDEGDEEDSTAGTTK	ALDIS[79.9663]LS[79.9663]SGEEDEGDEEDST[79.9663]AGTTK	K	Q	329	353	25	3	20T(79.9663),5S(79.9663),7S(79.9663)	sp|Q8IY81|SPB1_HUMAN	Q8IY81	SPB1_HUMAN	FTSJ3	pre-rRNA 2'-O-ribose RNA methyltransferase FTSJ3			1	1.13975848E8	MS/MS	STY:79.9663@ALDIS(0.7114)LS(0.6220)S(0.6220)GEEDEGDEEDS(0.3020)T(0.6605)AGT(0.0411)T(0.0411)K;
ALDSNSLENDDLSAPGR	ALDSNSLENDDLS[79.9663]APGR	K	E	739	755	17	2	13S(79.9663)	sp|Q32MZ4-2|LRRF1_HUMAN	Q32MZ4-2	LRRF1_HUMAN	LRRFIP1	Isoform 2 of Leucine-rich repeat flightless-interacting protein 1		sp|Q32MZ4-3|LRRF1_HUMAN, sp|Q32MZ4|LRRF1_HUMAN	1	0	MS/MS	STY:79.9663@ALDS(0.2026)NS(0.0410)LENDDLS(0.7564)APGR;
ALDSNSLENDDLSAPGR	ALDSNS[79.9663]LENDDLSAPGR	K	E	739	755	17	2	6S(79.9663)	sp|Q32MZ4-2|LRRF1_HUMAN	Q32MZ4-2	LRRF1_HUMAN	LRRFIP1	Isoform 2 of Leucine-rich repeat flightless-interacting protein 1		sp|Q32MZ4-3|LRRF1_HUMAN, sp|Q32MZ4|LRRF1_HUMAN	1	2.3149914E7	MS/MS	STY:79.9663@ALDS(0.0192)NS(0.4904)LENDDLS(0.4904)APGR;
ALDSNSLENDDLSAPGR	ALDS[79.9663]NSLENDDLSAPGR	K	E	739	755	17	2	4S(79.9663)	sp|Q32MZ4-2|LRRF1_HUMAN	Q32MZ4-2	LRRF1_HUMAN	LRRFIP1	Isoform 2 of Leucine-rich repeat flightless-interacting protein 1		sp|Q32MZ4-3|LRRF1_HUMAN, sp|Q32MZ4|LRRF1_HUMAN	1	2.3149914E7	MS/MS	STY:79.9663@ALDS(0.4912)NS(0.4912)LENDDLS(0.0176)APGR;
ALEAASLSQHPPSLCISDSEEEEEER	ALEAASLS[79.9663]QHPPSLC[57.0215]ISDS[79.9663]EEEEEER	R	K	46	71	26	3	15C(57.0215),19S(79.9663),8S(79.9663)	sp|O43159|RRP8_HUMAN	O43159	RRP8_HUMAN	RRP8	Ribosomal RNA-processing protein 8			1	0	MS/MS	STY:79.9663@ALEAAS(0.0318)LS(0.7599)QHPPS(0.3839)LCIS(0.0415)DS(0.7829)EEEEEER;
ALEEALSIQTPPSSPPTAFGSPEGAGALLR	ALEEALS[79.9663]IQTPPS[79.9663]SPPTAFGS[79.9663]PEGAGALLR	K	K	422	451	30	3	13S(79.9663),21S(79.9663),7S(79.9663)	sp|Q15025-2|TNIP1_HUMAN	Q15025-2	TNIP1_HUMAN	TNIP1	Isoform 2 of TNFAIP3-interacting protein 1		sp|Q15025-3|TNIP1_HUMAN, sp|Q15025-4|TNIP1_HUMAN, sp|Q15025-5|TNIP1_HUMAN, sp|Q15025-6|TNIP1_HUMAN, sp|Q15025-7|TNIP1_HUMAN, sp|Q15025-8|TNIP1_HUMAN, sp|Q15025|TNIP1_HUMAN	1	0	MS/MS	STY:79.9663@ALEEALS(0.6754)IQT(0.0516)PPS(0.6099)S(0.6099)PPT(0.3906)AFGS(0.6625)PEGAGALLR;
ALEEALSIQTPPSSPPTAFGSPEGAGALLR	ALEEALS[79.9663]IQT[79.9663]PPSSPPTAFGS[79.9663]PEGAGALLR	K	K	422	451	30	3	10T(79.9663),21S(79.9663),7S(79.9663)	sp|Q15025-2|TNIP1_HUMAN	Q15025-2	TNIP1_HUMAN	TNIP1	Isoform 2 of TNFAIP3-interacting protein 1		sp|Q15025-3|TNIP1_HUMAN, sp|Q15025-4|TNIP1_HUMAN, sp|Q15025-5|TNIP1_HUMAN, sp|Q15025-6|TNIP1_HUMAN, sp|Q15025-7|TNIP1_HUMAN, sp|Q15025-8|TNIP1_HUMAN, sp|Q15025|TNIP1_HUMAN	1	0	MS/MS	STY:79.9663@ALEEALS(0.5635)IQT(0.5635)PPS(0.4980)S(0.4980)PPT(0.3420)AFGS(0.5349)PEGAGALLR;
ALEEGDGSVSGSSPRSDISQPASQDGMR	ALEEGDGSVSGSS[79.9663]PRS[79.9663]DISQPASQDGMR	R	R	422	449	28	3	13S(79.9663),16S(79.9663)	sp|Q8N3X1-2|FNBP4_HUMAN	Q8N3X1-2	FNBP4_HUMAN	FNBP4	Isoform 2 of Formin-binding protein 4		sp|Q8N3X1|FNBP4_HUMAN	1	0	MS/MS	STY:79.9663@ALEEGDGS(0.0238)VS(0.0238)GS(0.0851)S(0.8386)PRS(0.8472)DIS(0.0246)QPAS(0.1569)QDGMR;
ALEEGDGSVSGSSPR	ALEEGDGSVSGS[79.9663]SPR	R	S	422	436	15	2	12S(79.9663)	sp|Q8N3X1-2|FNBP4_HUMAN	Q8N3X1-2	FNBP4_HUMAN	FNBP4	Isoform 2 of Formin-binding protein 4		sp|Q8N3X1|FNBP4_HUMAN	1	3.575926E7	MS/MS	STY:79.9663@ALEEGDGS(0.0422)VS(0.0970)GS(0.4304)S(0.4304)PR;
ALEEGDGSVSGSSPR	ALEEGDGS[79.9663]VSGSSPR	R	S	422	436	15	2	8S(79.9663)	sp|Q8N3X1-2|FNBP4_HUMAN	Q8N3X1-2	FNBP4_HUMAN	FNBP4	Isoform 2 of Formin-binding protein 4		sp|Q8N3X1|FNBP4_HUMAN	1	3.575926E7	MS/MS	STY:79.9663@ALEEGDGS(0.7595)VS(0.0343)GS(0.0197)S(0.1866)PR;
ALEEGDGSVSGSSPRSDISQPASQDGMR	ALEEGDGS[79.9663]VSGSSPRSDIS[79.9663]QPASQDGMR	R	R	422	449	28	3	19S(79.9663),8S(79.9663)	sp|Q8N3X1-2|FNBP4_HUMAN	Q8N3X1-2	FNBP4_HUMAN	FNBP4	Isoform 2 of Formin-binding protein 4		sp|Q8N3X1|FNBP4_HUMAN	1	4.2581836E7	MS/MS	STY:79.9663@ALEEGDGS(0.3620)VS(0.3620)GS(0.3620)S(0.3620)PRS(0.0905)DIS(0.4503)QPAS(0.0110)QDGMR;
ALEEGDGSVSGSSPRSDISQPASQDGMR	ALEEGDGS[79.9663]VSGSSPRS[79.9663]DISQPASQDGMR	R	R	422	449	28	3	16S(79.9663),8S(79.9663)	sp|Q8N3X1-2|FNBP4_HUMAN	Q8N3X1-2	FNBP4_HUMAN	FNBP4	Isoform 2 of Formin-binding protein 4		sp|Q8N3X1|FNBP4_HUMAN	1	4.2581836E7	MS/MS	STY:79.9663@ALEEGDGS(0.6675)VS(0.0223)GS(0.0192)S(0.3446)PRS(0.6911)DIS(0.0464)QPAS(0.2089)QDGMR;
ALEEGDGSVSGSSPRSDISQPASQDGMR	ALEEGDGS[79.9663]VSGSS[79.9663]PRSDISQPASQDGM[15.9949]R	R	R	422	449	28	3	13S(79.9663),27M(15.9949),8S(79.9663)	sp|Q8N3X1-2|FNBP4_HUMAN	Q8N3X1-2	FNBP4_HUMAN	FNBP4	Isoform 2 of Formin-binding protein 4		sp|Q8N3X1|FNBP4_HUMAN	1	1.6036508E7	MS/MS	M:15.9949@ALEEGDGSVSGSSPRSDISQPASQDGM(1.0000)R;STY:79.9663@ALEEGDGS(0.5483)VS(0.0419)GS(0.0419)S(0.4332)PRS(0.4332)DIS(0.2508)QPAS(0.2508)QDGMR;
ALEQQEAESDSSDTEEK	ALEQQEAESDS[79.9663]S[79.9663]DTEEK	K	D	189	205	17	2	11S(79.9663),12S(79.9663)	sp|Q9BXY0|MAK16_HUMAN	Q9BXY0	MAK16_HUMAN	MAK16	Protein MAK16 homolog			1	3.9285776E8	MS/MS	STY:79.9663@ALEQQEAES(0.1142)DS(0.6286)S(0.6286)DT(0.6286)EEK;
ALEQQEAESDSSDTEEK	ALEQQEAES[79.9663]DSSDT[79.9663]EEK	K	D	189	205	17	2	14T(79.9663),9S(79.9663)	sp|Q9BXY0|MAK16_HUMAN	Q9BXY0	MAK16_HUMAN	MAK16	Protein MAK16 homolog			2	3.9285776E8	MS/MS	STY:79.9663@ALEQQEAES(0.4870)DS(0.4870)S(0.4870)DT(0.5391)EEK;
ALEQQEAESDSSDTEEK	ALEQQEAES[79.9663]DSS[79.9663]DTEEK	K	D	189	205	17	2	12S(79.9663),9S(79.9663)	sp|Q9BXY0|MAK16_HUMAN	Q9BXY0	MAK16_HUMAN	MAK16	Protein MAK16 homolog			1	3.9285776E8	MS/MS	STY:79.9663@ALEQQEAES(0.6520)DS(0.1642)S(0.5919)DT(0.5919)EEK;
ALEQQEAESDSSDTEEK	ALEQQEAES[79.9663]DSS[79.9663]DT[79.9663]EEK	K	D	189	205	17	2	12S(79.9663),14T(79.9663),9S(79.9663)	sp|Q9BXY0|MAK16_HUMAN	Q9BXY0	MAK16_HUMAN	MAK16	Protein MAK16 homolog			1	0	MS/MS	STY:79.9663@ALEQQEAES(0.8548)DS(0.4324)S(0.8564)DT(0.8564)EEK;
ALEQQEAESDSSDTEEK	ALEQQEAES[79.9663]DS[79.9663]SDTEEK	K	D	189	205	17	2	11S(79.9663),9S(79.9663)	sp|Q9BXY0|MAK16_HUMAN	Q9BXY0	MAK16_HUMAN	MAK16	Protein MAK16 homolog			3	3.9285776E8	MS/MS	STY:79.9663@ALEQQEAES(0.6801)DS(0.6398)S(0.6398)DT(0.0402)EEK;
ALEQQEAESDSSDTEEK	ALEQQEAES[79.9663]DS[79.9663]SDT[79.9663]EEK	K	D	189	205	17	2	11S(79.9663),14T(79.9663),9S(79.9663)	sp|Q9BXY0|MAK16_HUMAN	Q9BXY0	MAK16_HUMAN	MAK16	Protein MAK16 homolog			1	4.4468292E7	MS/MS	STY:79.9663@ALEQQEAES(0.7436)DS(0.7436)S(0.7436)DT(0.7691)EEK;
ALEQQEAESDSSDTEEK	ALEQQEAES[79.9663]DS[79.9663]S[79.9663]DTEEK	K	D	189	205	17	2	11S(79.9663),12S(79.9663),9S(79.9663)	sp|Q9BXY0|MAK16_HUMAN	Q9BXY0	MAK16_HUMAN	MAK16	Protein MAK16 homolog			1	4.195568E7	MS/MS	STY:79.9663@ALEQQEAES(0.7630)DS(0.7630)S(0.7370)DT(0.7370)EEK;
ALEVEESNSEDEASFK	ALEVEESNS[79.9663]EDEAS[79.9663]FK	K	S	353	368	16	2	14S(79.9663),9S(79.9663)	sp|Q03111|ENL_HUMAN	Q03111	ENL_HUMAN	MLLT1	Protein ENL			1	3.1005712E7	MS/MS	STY:79.9663@ALEVEES(0.6553)NS(0.6656)EDEAS(0.6791)FK;
ALEVEESNSEDEASFK	ALEVEES[79.9663]NS[79.9663]EDEASFK	K	S	353	368	16	2	7S(79.9663),9S(79.9663)	sp|Q03111|ENL_HUMAN	Q03111	ENL_HUMAN	MLLT1	Protein ENL			1	3.2526096E7	MS/MS	STY:79.9663@ALEVEES(0.9485)NS(0.9485)EDEAS(0.1030)FK;
ALEYSNGIFDCQSPTSPFMGSLR	ALEYSNGIFDC[57.0215]QSPT[79.9663]SPFMGS[79.9663]LR	K	A	25	47	23	3	11C(57.0215),15T(79.9663),21S(79.9663)	sp|Q86W92-2|LIPB1_HUMAN	Q86W92-2	LIPB1_HUMAN	PPFIBP1	Isoform 2 of Liprin-beta-1		sp|Q86W92-4|LIPB1_HUMAN, sp|Q86W92-5|LIPB1_HUMAN, sp|Q86W92|LIPB1_HUMAN	1	0	MS/MS	STY:79.9663@ALEY(0.0313)S(0.0313)NGIFDCQS(0.0432)PT(0.5919)S(0.5919)PFMGS(0.7104)LR;
ALEYSNGIFDCQSPTSPFMGSLR	ALEYSNGIFDC[57.0215]QS[79.9663]PT[79.9663]SPFMGSLR	K	A	25	47	23	3	11C(57.0215),13S(79.9663),15T(79.9663)	sp|Q86W92-2|LIPB1_HUMAN	Q86W92-2	LIPB1_HUMAN	PPFIBP1	Isoform 2 of Liprin-beta-1		sp|Q86W92-4|LIPB1_HUMAN, sp|Q86W92-5|LIPB1_HUMAN, sp|Q86W92|LIPB1_HUMAN	1	0	MS/MS	STY:79.9663@ALEY(0.2848)S(0.2848)NGIFDCQS(0.3576)PT(0.3576)S(0.3576)PFMGS(0.3576)LR;
ALFKPPEDSQDDESDSDAEEEQTTK	ALFKPPEDSQDDESDSDAEEEQT[79.9663]T[79.9663]K	K	R	299	323	25	3	23T(79.9663),24T(79.9663)	sp|Q13769|THOC5_HUMAN	Q13769	THOC5_HUMAN	THOC5	THO complex subunit 5 homolog			2	4.4323936E7	MS/MS	STY:79.9663@ALFKPPEDS(0.0564)QDDES(0.1444)DS(0.1444)DAEEEQT(0.8274)T(0.8274)K;
ALFKPPEDSQDDESDSDAEEEQTTK	ALFKPPEDSQDDESDS[79.9663]DAEEEQTT[79.9663]K	K	R	299	323	25	3	16S(79.9663),24T(79.9663)	sp|Q13769|THOC5_HUMAN	Q13769	THOC5_HUMAN	THOC5	THO complex subunit 5 homolog			1	7.5806234E8	MS/MS	STY:79.9663@ALFKPPEDS(0.0369)QDDES(0.0759)DS(0.9125)DAEEEQT(0.0614)T(0.9134)K;
ALFKPPEDSQDDESDSDAEEEQTTK	ALFKPPEDSQDDES[79.9663]DS[79.9663]DAEEEQTTK	K	R	299	323	25	3	14S(79.9663),16S(79.9663)	sp|Q13769|THOC5_HUMAN	Q13769	THOC5_HUMAN	THOC5	THO complex subunit 5 homolog			15	8.3814682E8	MS/MS	STY:79.9663@ALFKPPEDS(0.0738)QDDES(0.9234)DS(0.9230)DAEEEQT(0.0399)T(0.0399)K;
ALFKPPEDSQDDESDSDAEEEQTTK	ALFKPPEDS[79.9663]QDDESDSDAEEEQTT[79.9663]K	K	R	299	323	25	3	24T(79.9663),9S(79.9663)	sp|Q13769|THOC5_HUMAN	Q13769	THOC5_HUMAN	THOC5	THO complex subunit 5 homolog			2	0	MS/MS	STY:79.9663@ALFKPPEDS(0.9406)QDDES(0.0382)DS(0.0382)DAEEEQT(0.0429)T(0.9402)K;
ALFKPPEDSQDDESDSDAEEEQTTK	ALFKPPEDS[79.9663]QDDESDSDAEEEQT[79.9663]T[79.9663]K	K	R	299	323	25	3	23T(79.9663),24T(79.9663),9S(79.9663)	sp|Q13769|THOC5_HUMAN	Q13769	THOC5_HUMAN	THOC5	THO complex subunit 5 homolog			1	0	MS/MS	STY:79.9663@ALFKPPEDS(0.6560)QDDES(0.5763)DS(0.4560)DAEEEQT(0.6558)T(0.6558)K;
ALFKPPEDSQDDESDSDAEEEQTTK	ALFKPPEDS[79.9663]QDDESDS[79.9663]DAEEEQTTK	K	R	299	323	25	3	16S(79.9663),9S(79.9663)	sp|Q13769|THOC5_HUMAN	Q13769	THOC5_HUMAN	THOC5	THO complex subunit 5 homolog			4	7.9382285E8	MS/MS	STY:79.9663@ALFKPPEDS(0.9235)QDDES(0.0376)DS(0.9234)DAEEEQT(0.0578)T(0.0578)K;
ALFKPPEDSQDDESDSDAEEEQTTK	ALFKPPEDS[79.9663]QDDESDS[79.9663]DAEEEQTT[79.9663]K	K	R	299	323	25	3	16S(79.9663),24T(79.9663),9S(79.9663)	sp|Q13769|THOC5_HUMAN	Q13769	THOC5_HUMAN	THOC5	THO complex subunit 5 homolog			1	1.50375376E8	MS/MS	STY:79.9663@ALFKPPEDS(0.6708)QDDES(0.4075)DS(0.6309)DAEEEQT(0.6200)T(0.6708)K;
ALFKPPEDSQDDESDSDAEEEQTTK	ALFKPPEDS[79.9663]QDDES[79.9663]DSDAEEEQTTK	K	R	299	323	25	3	14S(79.9663),9S(79.9663)	sp|Q13769|THOC5_HUMAN	Q13769	THOC5_HUMAN	THOC5	THO complex subunit 5 homolog			2	0	MS/MS	STY:79.9663@ALFKPPEDS(0.7175)QDDES(0.7446)DS(0.4191)DAEEEQT(0.0594)T(0.0594)K;
ALFKPPEDSQDDESDSDAEEEQTTK	ALFKPPEDS[79.9663]QDDES[79.9663]DS[79.9663]DAEEEQTTK	K	R	299	323	25	3	14S(79.9663),16S(79.9663),9S(79.9663)	sp|Q13769|THOC5_HUMAN	Q13769	THOC5_HUMAN	THOC5	THO complex subunit 5 homolog			5	1.50375376E8	MS/MS	STY:79.9663@ALFKPPEDS(0.9376)QDDES(0.9378)DS(0.9382)DAEEEQT(0.0932)T(0.0932)K;
ALPQTPR	ALPQT[79.9663]PR	K	P	1488	1494	7	2	5T(79.9663)	sp|Q9UQ35|SRRM2_HUMAN	Q9UQ35	SRRM2_HUMAN	SRRM2	Serine/arginine repetitive matrix protein 2		sp|Q9UQ35-2|SRRM2_HUMAN	1	1.1395874E7	MS/MS	STY:79.9663@ALPQT(1.0000)PR;
ALPSLNTGSSSPR	ALPSLNTGS[79.9663]SSPR	R	G	317	329	13	2	9S(79.9663)	sp|O14545|TRAD1_HUMAN	O14545	TRAD1_HUMAN	TRAFD1	TRAF-type zinc finger domain-containing protein 1			2	3.3356474E7	MS/MS	STY:79.9663@ALPS(0.0070)LNT(0.0072)GS(0.3286)S(0.3286)S(0.3286)PR;
ALPSLNTGSSSPR	ALPSLNT[79.9663]GSSSPR	R	G	317	329	13	2	7T(79.9663)	sp|O14545|TRAD1_HUMAN	O14545	TRAD1_HUMAN	TRAFD1	TRAF-type zinc finger domain-containing protein 1			1	3.3356474E7	MS/MS	STY:79.9663@ALPS(0.0058)LNT(0.2486)GS(0.2486)S(0.2486)S(0.2486)PR;
ALPSLNTGSSSPR	ALPS[79.9663]LNTGSSSPR	R	G	317	329	13	2	4S(79.9663)	sp|O14545|TRAD1_HUMAN	O14545	TRAD1_HUMAN	TRAFD1	TRAF-type zinc finger domain-containing protein 1			1	2.914718E7	MS/MS	STY:79.9663@ALPS(0.8958)LNT(0.0301)GS(0.0247)S(0.0247)S(0.0247)PR;
ALPTSKPEGSLHSSPVGPSSSK	ALPTSKPEGS[79.9663]LHS[79.9663]SPVGPSSSK	R	G	895	916	22	3	10S(79.9663),13S(79.9663)	sp|Q9UPT8|ZC3H4_HUMAN	Q9UPT8	ZC3H4_HUMAN	ZC3H4	Zinc finger CCCH domain-containing protein 4			1	9501560	MS/MS	STY:79.9663@ALPT(0.0645)S(0.0645)KPEGS(0.7929)LHS(0.7814)S(0.0742)PVGPS(0.0742)S(0.0742)S(0.0742)K;
ALQAPHSPSK	ALQAPHS[79.9663]PSK	R	T	8	17	10	2	7S(79.9663)	sp|Q96AQ6-2|PBIP1_HUMAN	Q96AQ6-2	PBIP1_HUMAN	PBXIP1	Isoform 2 of Pre-B-cell leukemia transcription factor-interacting protein 1		sp|Q96AQ6-3|PBIP1_HUMAN, sp|Q96AQ6|PBIP1_HUMAN	1	1.5386475E7	MS/MS	STY:79.9663@ALQAPHS(0.5000)PS(0.5000)K;
ALQESATGQPEPTSSPDNK	ALQESATGQPEPT[79.9663]SSPDNK	R	P	662	680	19	2	13T(79.9663)	sp|Q15911-2|ZFHX3_HUMAN	Q15911-2	ZFHX3_HUMAN	ZFHX3	Isoform B of Zinc finger homeobox protein 3		sp|Q15911|ZFHX3_HUMAN	1	0	MS/MS	STY:79.9663@ALQES(0.1089)AT(0.1556)GQPEPT(0.2452)S(0.2452)S(0.2452)PDNK;
ALQHTESPSETNK	ALQHTES[79.9663]PSETNK	K	P	136	148	13	2	7S(79.9663)	sp|Q14669-3|TRIPC_HUMAN	Q14669-3	TRIPC_HUMAN	TRIP12	Isoform 3 of E3 ubiquitin-protein ligase TRIP12		sp|Q14669-2|TRIPC_HUMAN, sp|Q14669|TRIPC_HUMAN	1	0	MS/MS	STY:79.9663@ALQHT(0.0236)ES(0.8881)PS(0.0441)ET(0.0441)NK;
ALSASHTDLAH	ALSAS[79.9663]HTDLAH	R	-	627	637	11	2	5S(79.9663)	sp|Q07866-4|KLC1_HUMAN	Q07866-4	KLC1_HUMAN	KLC1	Isoform J of Kinesin light chain 1		sp|Q07866-6|KLC1_HUMAN, sp|Q07866-7|KLC1_HUMAN	1	2.0670988E7	MS/MS	STY:79.9663@ALS(0.0258)AS(0.7559)HT(0.2183)DLAH;
ALSSAVQASPTSPGGSPSSPSSGQR	ALSSAVQAS[79.9663]PT[79.9663]SPGGSPSSPSSGQR	K	S	3462	3486	25	3	11T(79.9663),9S(79.9663)	sp|Q03164-2|KMT2A_HUMAN	Q03164-2	KMT2A_HUMAN	KMT2A	Isoform 2 of Histone-lysine N-methyltransferase 2A		sp|Q03164-3|KMT2A_HUMAN, sp|Q03164|KMT2A_HUMAN	1	2.4805054E7	MS/MS	STY:79.9663@ALS(0.0989)S(0.1396)AVQAS(0.2342)PT(0.2342)S(0.2342)PGGS(0.1217)PS(0.2342)S(0.2342)PS(0.2342)S(0.2342)GQR;
ALSSGGSITSPPLSPALPK	ALSSGGSITS[79.9663]PPLSPALPK	R	Y	17	35	19	2	10S(79.9663)	sp|Q6Y7W6-3|GGYF2_HUMAN	Q6Y7W6-3	GGYF2_HUMAN	GIGYF2	Isoform 2 of GRB10-interacting GYF protein 2		sp|Q6Y7W6-4|GGYF2_HUMAN, sp|Q6Y7W6-5|GGYF2_HUMAN, sp|Q6Y7W6|GGYF2_HUMAN	1	6.7069152E7	MS/MS	STY:79.9663@ALS(0.0112)S(0.0112)GGS(0.0121)IT(0.0121)S(0.9363)PPLS(0.0170)PALPK;
ALSSGGSITSPPLSPALPK	ALSSGGSIT[79.9663]SPPLSPALPK	R	Y	17	35	19	2	9T(79.9663)	sp|Q6Y7W6-3|GGYF2_HUMAN	Q6Y7W6-3	GGYF2_HUMAN	GIGYF2	Isoform 2 of GRB10-interacting GYF protein 2		sp|Q6Y7W6-4|GGYF2_HUMAN, sp|Q6Y7W6-5|GGYF2_HUMAN, sp|Q6Y7W6|GGYF2_HUMAN	2	6.7069152E7	MS/MS	STY:79.9663@ALS(0.0112)S(0.0112)GGS(0.0112)IT(0.9425)S(0.0127)PPLS(0.0113)PALPK;
ALSSLHGDDQDSEDEVLTIPEVK	ALSSLHGDDQDS[79.9663]EDEVLTIPEVK	K	V	2398	2420	23	3	12S(79.9663)	sp|P11717|MPRI_HUMAN	P11717	MPRI_HUMAN	IGF2R	Cation-independent mannose-6-phosphate receptor			2	5.1425028E7	MS/MS	STY:79.9663@ALS(0.0571)S(0.0571)LHGDDQDS(0.8669)EDEVLT(0.0190)IPEVK;
ALSSLHGDDQDSEDEVLTIPEVK	ALSS[79.9663]LHGDDQDS[79.9663]EDEVLTIPEVK	K	V	2398	2420	23	3	12S(79.9663),4S(79.9663)	sp|P11717|MPRI_HUMAN	P11717	MPRI_HUMAN	IGF2R	Cation-independent mannose-6-phosphate receptor			1	5.5295528E7	MS/MS	STY:79.9663@ALS(0.0675)S(0.9033)LHGDDQDS(0.8960)EDEVLT(0.1333)IPEVK;
ALSASHTDLAH	ALS[79.9663]ASHTDLAH	R	-	627	637	11	2	3S(79.9663)	sp|Q07866-4|KLC1_HUMAN	Q07866-4	KLC1_HUMAN	KLC1	Isoform J of Kinesin light chain 1		sp|Q07866-6|KLC1_HUMAN, sp|Q07866-7|KLC1_HUMAN	1	2.0670988E7	MS/MS	STY:79.9663@ALS(0.9385)AS(0.0329)HT(0.0286)DLAH;
ALSIHSDVEDSGESEEEGATDER	ALS[79.9663]IHS[79.9663]DVEDS[79.9663]GESEEEGATDER	K	Q	482	504	23	3	11S(79.9663),3S(79.9663),6S(79.9663)	sp|P15822|ZEP1_HUMAN	P15822	ZEP1_HUMAN	HIVEP1	Zinc finger protein 40			1	6.12676e+06	MS/MS	STY:79.9663@ALS(0.6000)IHS(0.6000)DVEDS(0.6000)GES(0.6000)EEEGAT(0.6000)DER;
ALSSDSILSPAPDAR	ALS[79.9663]SDSILSPAPDAR	R	A	392	406	15	2	3S(79.9663)	sp|Q8IVT2|MISP_HUMAN	Q8IVT2	MISP_HUMAN	MISP	Mitotic interactor and substrate of PLK1			2	9.5939072E7	MS/MS	STY:79.9663@ALS(0.9267)S(0.0207)DS(0.0279)ILS(0.0246)PAPDAR;
ALSSGGSITSPPLSPALPK	ALS[79.9663]SGGSITS[79.9663]PPLSPALPK	R	Y	17	35	19	2	10S(79.9663),3S(79.9663)	sp|Q6Y7W6-3|GGYF2_HUMAN	Q6Y7W6-3	GGYF2_HUMAN	GIGYF2	Isoform 2 of GRB10-interacting GYF protein 2		sp|Q6Y7W6-4|GGYF2_HUMAN, sp|Q6Y7W6-5|GGYF2_HUMAN, sp|Q6Y7W6|GGYF2_HUMAN	1	2.2649028E7	MS/MS	STY:79.9663@ALS(0.5551)S(0.5551)GGS(0.0942)IT(0.0942)S(0.6732)PPLS(0.0283)PALPK;
ALSSLHGDDQDSEDEVLTIPEVK	ALS[79.9663]SLHGDDQDS[79.9663]EDEVLTIPEVK	K	V	2398	2420	23	3	12S(79.9663),3S(79.9663)	sp|P11717|MPRI_HUMAN	P11717	MPRI_HUMAN	IGF2R	Cation-independent mannose-6-phosphate receptor			1	5.5295528E7	MS/MS	STY:79.9663@ALS(0.6317)S(0.6317)LHGDDQDS(0.6946)EDEVLT(0.0421)IPEVK;
ALSSDSILSPAPDAR	ALS[79.9663]S[79.9663]DSILSPAPDAR	R	A	392	406	15	2	3S(79.9663),4S(79.9663)	sp|Q8IVT2|MISP_HUMAN	Q8IVT2	MISP_HUMAN	MISP	Mitotic interactor and substrate of PLK1			1	1.4445864E7	MS/MS	STY:79.9663@ALS(0.8746)S(0.8746)DS(0.1822)ILS(0.0685)PAPDAR;
ALTDDSDENEEEDAFTDQK	ALT[79.9663]DDSDENEEEDAFTDQK	K	I	1207	1225	19	2	3T(79.9663)	sp|Q8NI35-2|INADL_HUMAN	Q8NI35-2	INADL_HUMAN	PATJ	Isoform 2 of InaD-like protein		sp|Q8NI35-3|INADL_HUMAN, sp|Q8NI35-4|INADL_HUMAN, sp|Q8NI35-5|INADL_HUMAN, sp|Q8NI35|INADL_HUMAN	1	0	MS/MS	STY:79.9663@ALT(0.3333)DDS(0.3333)DENEEEDAFT(0.3333)DQK;
ALVEFESNPEETREPGSPPSVQR	ALVEFESNPEETREPGSPPS[79.9663]VQR	R	A	31	53	23	3	20S(79.9663)	sp|Q9H6F5|CCD86_HUMAN	Q9H6F5	CCD86_HUMAN	CCDC86	Coiled-coil domain-containing protein 86			3	9.6036704E7	MS/MS	STY:79.9663@ALVEFES(0.0184)NPEET(0.0198)REPGS(0.0204)PPS(0.9414)VQR;
ALVVPEPEPDSDSNQER	ALVVPEPEPDSDS[79.9663]NQER	K	K	126	142	17	2,3	13S(79.9663)	sp|Q5VTR2|BRE1A_HUMAN	Q5VTR2	BRE1A_HUMAN	RNF20	E3 ubiquitin-protein ligase BRE1A			3	2.0878048E8	MS/MS	STY:79.9663@ALVVPEPEPDS(0.0588)DS(0.9412)NQER;
ALVVPEPEPDSDSNQER	ALVVPEPEPDS[79.9663]DSNQER	K	K	126	142	17	2,3	11S(79.9663)	sp|Q5VTR2|BRE1A_HUMAN	Q5VTR2	BRE1A_HUMAN	RNF20	E3 ubiquitin-protein ligase BRE1A			7	2.16348656E8	MS/MS	STY:79.9663@ALVVPEPEPDS(0.9429)DS(0.0571)NQER;
ALVVPEPEPDSDSNQER	ALVVPEPEPDS[79.9663]DS[79.9663]NQER	K	K	126	142	17	2	11S(79.9663),13S(79.9663)	sp|Q5VTR2|BRE1A_HUMAN	Q5VTR2	BRE1A_HUMAN	RNF20	E3 ubiquitin-protein ligase BRE1A			3	4.5746012E7	MS/MS	STY:79.9663@ALVVPEPEPDS(1.0000)DS(1.0000)NQER;
AMDNHSDSEEELAAFCPQLDDSTVAR	AMDNHSDS[79.9663]EEELAAFC[57.0215]PQLDDS[79.9663]TVAR	R	E	253	278	26	3	16C(57.0215),22S(79.9663),8S(79.9663)	sp|Q86VR2|RETR3_HUMAN	Q86VR2	RETR3_HUMAN	RETREG3	Reticulophagy regulator 3		sp|Q86VR2-2|RETR3_HUMAN	1	0	MS/MS	STY:79.9663@AMDNHS(0.0666)DS(0.6506)EEELAAFCPQLDDS(0.6414)T(0.6414)VAR;
AMDNHSDSEEELAAFCPQLDDSTVAR	AMDNHS[79.9663]DS[79.9663]EEELAAFC[57.0215]PQLDDSTVAR	R	E	253	278	26	3	16C(57.0215),6S(79.9663),8S(79.9663)	sp|Q86VR2|RETR3_HUMAN	Q86VR2	RETR3_HUMAN	RETREG3	Reticulophagy regulator 3		sp|Q86VR2-2|RETR3_HUMAN	5	1.33681992E8	MS/MS	STY:79.9663@AMDNHS(0.9302)DS(0.9301)EEELAAFCPQLDDS(0.0588)T(0.0810)VAR;
AMEGNSSDQEQSPEDEDEGPAEEVPTQMPEQNPTHALPESPR	AMEGNSSDQEQSPEDEDEGPAEEVPT[79.9663]QMPEQNPT[79.9663]HALPESPR	R	L	453	494	42	4	26T(79.9663),34T(79.9663)	sp|Q86Y91-6|KI18B_HUMAN	Q86Y91-6	KI18B_HUMAN	KIF18B	Isoform 2 of Kinesin-like protein KIF18B		sp|Q86Y91|KI18B_HUMAN	1	2.9737144E7	MS/MS	STY:79.9663@AMEGNS(0.3642)S(0.3642)DQEQS(0.2442)PEDEDEGPAEEVPT(0.4997)QMPEQNPT(0.5037)HALPES(0.0240)PR;
AMDNHSDSEEELAAFCPQLDDSTVAR	AM[15.9949]DNHS[79.9663]DS[79.9663]EEELAAFC[57.0215]PQLDDSTVAR	R	E	253	278	26	3	16C(57.0215),2M(15.9949),6S(79.9663),8S(79.9663)	sp|Q86VR2|RETR3_HUMAN	Q86VR2	RETR3_HUMAN	RETREG3	Reticulophagy regulator 3		sp|Q86VR2-2|RETR3_HUMAN	2	3.5589896E7	MS/MS	M:15.9949@AM(1.0000)DNHSDSEEELAAFCPQLDDSTVAR;STY:79.9663@AMDNHS(0.8675)DS(0.8675)EEELAAFCPQLDDS(0.1325)T(0.1325)VAR;
ANDGGLAAGAPAMHMASYGPEPCTDNSDSLIAK	ANDGGLAAGAPAMHMASY[79.9663]GPEPC[57.0215]TDNS[79.9663]DSLIAK	K	I	63	95	33	3	18Y(79.9663),23C(57.0215),27S(79.9663)	sp|O43823|AKAP8_HUMAN	O43823	AKAP8_HUMAN	AKAP8	A-kinase anchor protein 8			1	0	MS/MS	STY:79.9663@ANDGGLAAGAPAMHMAS(0.0591)Y(0.6162)GPEPCT(0.2602)DNS(0.5323)DS(0.5323)LIAK;
ANEAGGQVGPEAPRPPETSPEMR	ANEAGGQVGPEAPRPPETS[79.9663]PEMR	R	S	267	289	23	3	19S(79.9663)	sp|Q8N3D4|EH1L1_HUMAN	Q8N3D4	EH1L1_HUMAN	EHBP1L1	EH domain-binding protein 1-like protein 1			1	8.5346848E7	MS/MS	STY:79.9663@ANEAGGQVGPEAPRPPET(0.0705)S(0.9295)PEMR;
ANEAGGQVGPEAPRPPETSPEMR	ANEAGGQVGPEAPRPPET[79.9663]SPEMR	R	S	267	289	23	3	18T(79.9663)	sp|Q8N3D4|EH1L1_HUMAN	Q8N3D4	EH1L1_HUMAN	EHBP1L1	EH domain-binding protein 1-like protein 1			4	8.5346848E7	MS/MS	STY:79.9663@ANEAGGQVGPEAPRPPET(0.5000)S(0.5000)PEMR;
ANEAGGQVGPEAPRPPETSPEMR	ANEAGGQVGPEAPRPPET[79.9663]SPEM[15.9949]R	R	S	267	289	23	3	18T(79.9663),22M(15.9949)	sp|Q8N3D4|EH1L1_HUMAN	Q8N3D4	EH1L1_HUMAN	EHBP1L1	EH domain-binding protein 1-like protein 1			3	3.3762008E7	MS/MS	M:15.9949@ANEAGGQVGPEAPRPPETSPEM(1.0000)R;STY:79.9663@ANEAGGQVGPEAPRPPET(0.7939)S(0.2061)PEMR;
ANFDEENAYFEDEEEDSSNVDLPYIPAENSPTR	ANFDEENAYFEDEEEDSSNVDLPYIPAENS[79.9663]PTR	R	Q	67	99	33	3	30S(79.9663)	sp|Q86XP3|DDX42_HUMAN	Q86XP3	DDX42_HUMAN	DDX42	ATP-dependent RNA helicase DDX42			2	2.23486208E8	MS/MS	STY:79.9663@ANFDEENAY(0.0233)FEDEEEDS(0.0211)S(0.0211)NVDLPY(0.0263)IPAENS(0.4540)PT(0.4540)R;
ANFDEENAYFEDEEEDSSNVDLPYIPAENSPTR	ANFDEENAYFEDEEEDSSNVDLPY[79.9663]IPAENSPTR	R	Q	67	99	33	3	24Y(79.9663)	sp|Q86XP3|DDX42_HUMAN	Q86XP3	DDX42_HUMAN	DDX42	ATP-dependent RNA helicase DDX42			1	0	MS/MS	STY:79.9663@ANFDEENAY(0.0339)FEDEEEDS(0.0288)S(0.0288)NVDLPY(0.4345)IPAENS(0.4345)PT(0.0395)R;
ANNSQEPSPQLASSVASTR	ANNSQEPSPQLAS[79.9663]SVASTR	K	S	306	324	19	3	13S(79.9663)	sp|Q96HC4|PDLI5_HUMAN	Q96HC4	PDLI5_HUMAN	PDLIM5	PDZ and LIM domain protein 5		sp|Q96HC4-4|PDLI5_HUMAN, sp|Q96HC4-7|PDLI5_HUMAN	1	0	MS/MS	STY:79.9663@ANNS(0.0107)QEPS(0.0249)PQLAS(0.4324)S(0.4324)VAS(0.0284)T(0.0712)R;
ANNSQEPSPQLASSVASTR	ANNSQEPS[79.9663]PQLASSVASTR	K	S	306	324	19	2,3	8S(79.9663)	sp|Q96HC4|PDLI5_HUMAN	Q96HC4	PDLI5_HUMAN	PDLIM5	PDZ and LIM domain protein 5		sp|Q96HC4-4|PDLI5_HUMAN, sp|Q96HC4-7|PDLI5_HUMAN	2	7948935	MS/MS	STY:79.9663@ANNS(0.0946)QEPS(0.8536)PQLAS(0.0147)S(0.0124)VAS(0.0124)T(0.0124)R;
ANNSQEPSPQLASSVASTR	ANNS[79.9663]QEPS[79.9663]PQLASSVASTR	K	S	306	324	19	3	4S(79.9663),8S(79.9663)	sp|Q96HC4|PDLI5_HUMAN	Q96HC4	PDLI5_HUMAN	PDLIM5	PDZ and LIM domain protein 5		sp|Q96HC4-4|PDLI5_HUMAN, sp|Q96HC4-7|PDLI5_HUMAN	2	6874785	MS/MS	STY:79.9663@ANNS(0.8136)QEPS(0.8126)PQLAS(0.0934)S(0.0934)VAS(0.0934)T(0.0934)R;
ANQISPSNSSLK	ANQISPSNSS[79.9663]LK	K	N	79	90	12	2	10S(79.9663)	sp|Q86UU0-2|BCL9L_HUMAN	Q86UU0-2	BCL9L_HUMAN	BCL9L	Isoform 2 of B-cell CLL/lymphoma 9-like protein		sp|Q86UU0-3|BCL9L_HUMAN, sp|Q86UU0-4|BCL9L_HUMAN, sp|Q86UU0|BCL9L_HUMAN	1	1.2662634E7	MS/MS	STY:79.9663@ANQIS(0.0200)PS(0.0200)NS(0.0200)S(0.9400)LK;
ANQISPSNSSLK	ANQIS[79.9663]PSNSSLK	K	N	79	90	12	2	5S(79.9663)	sp|Q86UU0-2|BCL9L_HUMAN	Q86UU0-2	BCL9L_HUMAN	BCL9L	Isoform 2 of B-cell CLL/lymphoma 9-like protein		sp|Q86UU0-3|BCL9L_HUMAN, sp|Q86UU0-4|BCL9L_HUMAN, sp|Q86UU0|BCL9L_HUMAN	1	1.2662634E7	MS/MS	STY:79.9663@ANQIS(0.9428)PS(0.0191)NS(0.0191)S(0.0191)LK;
ANSDDERPVASDNDDEK	ANSDDERPVAS[79.9663]DNDDEK	K	Q	210	226	17	2	11S(79.9663)	sp|Q8WVC0-2|LEO1_HUMAN	Q8WVC0-2	LEO1_HUMAN	LEO1	Isoform 2 of RNA polymerase-associated protein LEO1		sp|Q8WVC0|LEO1_HUMAN	1	1.9942124E7	MS/MS	STY:79.9663@ANS(0.0639)DDERPVAS(0.9361)DNDDEK;
ANSDDERPVASDNDDEK	ANS[79.9663]DDERPVAS[79.9663]DNDDEK	K	Q	210	226	17	2	11S(79.9663),3S(79.9663)	sp|Q8WVC0-2|LEO1_HUMAN	Q8WVC0-2	LEO1_HUMAN	LEO1	Isoform 2 of RNA polymerase-associated protein LEO1		sp|Q8WVC0|LEO1_HUMAN	14	7.6474061E8	MS/MS	STY:79.9663@ANS(1.0000)DDERPVAS(1.0000)DNDDEK;
ANSPEKPPEAGAAHK	ANS[79.9663]PEKPPEAGAAHK	K	P	210	224	15	2,3	3S(79.9663)	sp|Q9UFC0|LRWD1_HUMAN	Q9UFC0	LRWD1_HUMAN	LRWD1	Leucine-rich repeat and WD repeat-containing protein 1			4	5.2911132E7	MS/MS	STY:79.9663@ANS(1.0000)PEKPPEAGAAHK;
ANTPDSDITEKTEDSSVPETPDNER	ANTPDS[79.9663]DIT[79.9663]EKT[79.9663]EDSSVPETPDNER	R	K	52	76	25	3	12T(79.9663),6S(79.9663),9T(79.9663)	sp|Q9H4L7-2|SMRCD_HUMAN	Q9H4L7-2	SMRCD_HUMAN	SMARCAD1	Isoform 2 of SWI/SNF-related matrix-associated actin-dependent regulator of chromatin subfamily A containing DEAD/H box 1		sp|Q9H4L7|SMRCD_HUMAN	1	1.9495284E7	MS/MS	STY:79.9663@ANT(0.5005)PDS(0.5845)DIT(0.5633)EKT(0.5633)EDS(0.4607)S(0.2839)VPET(0.0438)PDNER;
ANTSGDFEK	ANTS[79.9663]GDFEK	K	D	1990	1998	9	2	4S(79.9663)	sp|P49792|RBP2_HUMAN	P49792	RBP2_HUMAN	RANBP2	E3 SUMO-protein ligase RanBP2	RGPD1, RGPD2, RGPD3, RGPD4, RGPD5, RGPD8	sp|A6NKT7|RGPD3_HUMAN, sp|O14715|RGPD8_HUMAN, sp|P0DJD0|RGPD1_HUMAN, sp|P0DJD1|RGPD2_HUMAN, sp|Q7Z3J3|RGPD4_HUMAN, sp|Q99666|RGPD5_HUMAN	1	2.8815788E7	MS/MS	STY:79.9663@ANT(0.0549)S(0.9451)GDFEK;
ANTPDSDITEK	ANT[79.9663]PDSDITEK	R	T	52	62	11	2	3T(79.9663)	sp|Q9H4L7-2|SMRCD_HUMAN	Q9H4L7-2	SMRCD_HUMAN	SMARCAD1	Isoform 2 of SWI/SNF-related matrix-associated actin-dependent regulator of chromatin subfamily A containing DEAD/H box 1		sp|Q9H4L7|SMRCD_HUMAN	1	0	MS/MS	STY:79.9663@ANT(0.4646)PDS(0.4646)DIT(0.0708)EK;
ANTPDSDITEKTEDSSVPETPDNER	ANT[79.9663]PDSDITEKT[79.9663]EDS[79.9663]SVPETPDNER	R	K	52	76	25	3	12T(79.9663),15S(79.9663),3T(79.9663)	sp|Q9H4L7-2|SMRCD_HUMAN	Q9H4L7-2	SMRCD_HUMAN	SMARCAD1	Isoform 2 of SWI/SNF-related matrix-associated actin-dependent regulator of chromatin subfamily A containing DEAD/H box 1		sp|Q9H4L7|SMRCD_HUMAN	1	1.9495284E7	MS/MS	STY:79.9663@ANT(0.6351)PDS(0.0505)DIT(0.0989)EKT(0.5738)EDS(0.5738)S(0.5340)VPET(0.5340)PDNER;
ANTPDSDITEK	ANT[79.9663]PDSDIT[79.9663]EK	R	T	52	62	11	2	3T(79.9663),9T(79.9663)	sp|Q9H4L7-2|SMRCD_HUMAN	Q9H4L7-2	SMRCD_HUMAN	SMARCAD1	Isoform 2 of SWI/SNF-related matrix-associated actin-dependent regulator of chromatin subfamily A containing DEAD/H box 1		sp|Q9H4L7|SMRCD_HUMAN	1	2.05296352E8	MS/MS	STY:79.9663@ANT(0.9427)PDS(0.1108)DIT(0.9465)EK;
ANTPDSDITEK	ANT[79.9663]PDS[79.9663]DITEK	R	T	52	62	11	2	3T(79.9663),6S(79.9663)	sp|Q9H4L7-2|SMRCD_HUMAN	Q9H4L7-2	SMRCD_HUMAN	SMARCAD1	Isoform 2 of SWI/SNF-related matrix-associated actin-dependent regulator of chromatin subfamily A containing DEAD/H box 1		sp|Q9H4L7|SMRCD_HUMAN	3	2.05296352E8	MS/MS	STY:79.9663@ANT(0.9484)PDS(0.9484)DIT(0.1032)EK;
ANTSGDFEK	ANT[79.9663]SGDFEK	K	D	1990	1998	9	2	3T(79.9663)	sp|P49792|RBP2_HUMAN	P49792	RBP2_HUMAN	RANBP2	E3 SUMO-protein ligase RanBP2	RGPD1, RGPD2, RGPD3, RGPD4, RGPD5, RGPD8	sp|A6NKT7|RGPD3_HUMAN, sp|O14715|RGPD8_HUMAN, sp|P0DJD0|RGPD1_HUMAN, sp|P0DJD1|RGPD2_HUMAN, sp|Q7Z3J3|RGPD4_HUMAN, sp|Q99666|RGPD5_HUMAN	2	4.6035008E7	MS/MS	STY:79.9663@ANT(0.8910)S(0.1090)GDFEK;
ANVSSPHR	ANVSS[79.9663]PHR	K	E	149	156	8	2	5S(79.9663)	sp|Q92530|PSMF1_HUMAN	Q92530	PSMF1_HUMAN	PSMF1	Proteasome inhibitor PI31 subunit			4	7.2148752E7	MS/MS	STY:79.9663@ANVS(0.0549)S(0.9451)PHR;
APAASEGNHTDGAEEAAGSCAQAPSHSPPNK	APAASEGNHTDGAEEAAGSC[57.0215]AQAPSHS[79.9663]PPNK	R	P	301	331	31	3	20C(57.0215),27S(79.9663)	sp|Q92560|BAP1_HUMAN	Q92560	BAP1_HUMAN	BAP1	Ubiquitin carboxyl-terminal hydrolase BAP1			1	1.5232014E7	MS/MS	STY:79.9663@APAAS(0.2333)EGNHT(0.1334)DGAEEAAGS(0.0161)CAQAPS(0.0161)HS(0.6012)PPNK;
APAGQEEPGTPPSSPLSAEQLDR	APAGQEEPGTPPSS[79.9663]PLSAEQLDR	K	I	51	73	23	3	14S(79.9663)	sp|P13051|UNG_HUMAN	P13051	UNG_HUMAN	UNG	Uracil-DNA glycosylase		sp|P13051-2|UNG_HUMAN	1	3.9740836E7	MS/MS	STY:79.9663@APAGQEEPGT(0.0239)PPS(0.0578)S(0.8999)PLS(0.0184)AEQLDR;
APAGQEEPGTPPSSPLSAEQLDR	APAGQEEPGTPPS[79.9663]SPLSAEQLDR	K	I	51	73	23	3	13S(79.9663)	sp|P13051|UNG_HUMAN	P13051	UNG_HUMAN	UNG	Uracil-DNA glycosylase		sp|P13051-2|UNG_HUMAN	1	3.9740836E7	MS/MS	STY:79.9663@APAGQEEPGT(0.0514)PPS(0.3162)S(0.3162)PLS(0.3162)AEQLDR;
APAGQEEPGTPPSSPLSAEQLDR	APAGQEEPGTPPS[79.9663]S[79.9663]PLSAEQLDR	K	I	51	73	23	3	13S(79.9663),14S(79.9663)	sp|P13051|UNG_HUMAN	P13051	UNG_HUMAN	UNG	Uracil-DNA glycosylase		sp|P13051-2|UNG_HUMAN	2	3.609078E7	MS/MS	STY:79.9663@APAGQEEPGT(0.0658)PPS(0.9404)S(0.9406)PLS(0.0532)AEQLDR;
APAGQEEPGTPPSSPLSAEQLDR	APAGQEEPGT[79.9663]PPSSPLSAEQLDR	K	I	51	73	23	3	10T(79.9663)	sp|P13051|UNG_HUMAN	P13051	UNG_HUMAN	UNG	Uracil-DNA glycosylase		sp|P13051-2|UNG_HUMAN	7	5.2996076E7	MS/MS	STY:79.9663@APAGQEEPGT(0.9232)PPS(0.0260)S(0.0260)PLS(0.0247)AEQLDR;
APAGQEEPGTPPSSPLSAEQLDR	APAGQEEPGT[79.9663]PPSSPLS[79.9663]AEQLDR	K	I	51	73	23	3	10T(79.9663),17S(79.9663)	sp|P13051|UNG_HUMAN	P13051	UNG_HUMAN	UNG	Uracil-DNA glycosylase		sp|P13051-2|UNG_HUMAN	1	0	MS/MS	STY:79.9663@APAGQEEPGT(0.9380)PPS(0.0537)S(0.0708)PLS(0.9375)AEQLDR;
APAGQEEPGTPPSSPLSAEQLDR	APAGQEEPGT[79.9663]PPSS[79.9663]PLSAEQLDR	K	I	51	73	23	3	10T(79.9663),14S(79.9663)	sp|P13051|UNG_HUMAN	P13051	UNG_HUMAN	UNG	Uracil-DNA glycosylase		sp|P13051-2|UNG_HUMAN	2	1.28147968E8	MS/MS	STY:79.9663@APAGQEEPGT(0.9418)PPS(0.0620)S(0.9431)PLS(0.0531)AEQLDR;
APAGQEEPGTPPSSPLSAEQLDR	APAGQEEPGT[79.9663]PPS[79.9663]SPLSAEQLDR	K	I	51	73	23	3	10T(79.9663),13S(79.9663)	sp|P13051|UNG_HUMAN	P13051	UNG_HUMAN	UNG	Uracil-DNA glycosylase		sp|P13051-2|UNG_HUMAN	1	0	MS/MS	STY:79.9663@APAGQEEPGT(0.8433)PPS(0.8408)S(0.1727)PLS(0.1431)AEQLDR;
APEEGDAEVMQLGSSSPPPAR	APEEGDAEVMQLGS[79.9663]SSPPPAR	R	G	69	89	21	3	14S(79.9663)	sp|Q6NUJ5-2|PWP2B_HUMAN	Q6NUJ5-2	PWP2B_HUMAN	PWWP2B	Isoform 2 of PWWP domain-containing protein 2B		sp|Q6NUJ5|PWP2B_HUMAN	1	6.64152e+06	MS/MS	STY:79.9663@APEEGDAEVMQLGS(0.3333)S(0.3333)S(0.3333)PPPAR;
APEPLGPADQSELGPEQLEAEVGESSDEEPVESR	APEPLGPADQSELGPEQLEAEVGESS[79.9663]DEEPVES[79.9663]R	K	A	141	174	34	4	26S(79.9663),33S(79.9663)	sp|Q969G5|CAVN3_HUMAN	Q969G5	CAVN3_HUMAN	CAVIN3	Caveolae-associated protein 3			1	0	MS/MS	STY:79.9663@APEPLGPADQS(0.1416)ELGPEQLEAEVGES(0.1508)S(0.8591)DEEPVES(0.8485)R;
APEPLGPADQSELGPEQLEAEVGESSDEEPVESR	APEPLGPADQSELGPEQLEAEVGES[79.9663]SDEEPVES[79.9663]R	K	A	141	174	34	3,4	25S(79.9663),33S(79.9663)	sp|Q969G5|CAVN3_HUMAN	Q969G5	CAVN3_HUMAN	CAVIN3	Caveolae-associated protein 3			4	1.40607642E9	MS/MS	STY:79.9663@APEPLGPADQS(0.0676)ELGPEQLEAEVGES(0.9362)S(0.0599)DEEPVES(0.9362)R;
APEPLGPADQSELGPEQLEAEVGESSDEEPVESR	APEPLGPADQSELGPEQLEAEVGES[79.9663]S[79.9663]DEEPVESR	K	A	141	174	34	3,4	25S(79.9663),26S(79.9663)	sp|Q969G5|CAVN3_HUMAN	Q969G5	CAVN3_HUMAN	CAVIN3	Caveolae-associated protein 3			16	1.36210701E9	MS/MS	STY:79.9663@APEPLGPADQS(0.0630)ELGPEQLEAEVGES(0.9392)S(0.9392)DEEPVES(0.0586)R;
APEPLGPADQSELGPEQLEAEVGESSDEEPVESR	APEPLGPADQS[79.9663]ELGPEQLEAEVGES[79.9663]SDEEPVESR	K	A	141	174	34	3	11S(79.9663),25S(79.9663)	sp|Q969G5|CAVN3_HUMAN	Q969G5	CAVN3_HUMAN	CAVIN3	Caveolae-associated protein 3			2	3.4017192E7	MS/MS	STY:79.9663@APEPLGPADQS(0.7229)ELGPEQLEAEVGES(0.7399)S(0.4637)DEEPVES(0.0735)R;
APESDTGDEDQDQER	APES[79.9663]DTGDEDQDQER	R	D	501	515	15	2	4S(79.9663)	sp|Q9H4G0-2|E41L1_HUMAN	Q9H4G0-2	E41L1_HUMAN	EPB41L1	Isoform 2 of Band 4.1-like protein 1		sp|Q9H4G0-3|E41L1_HUMAN, sp|Q9H4G0|E41L1_HUMAN	1	2.76267E7	MS/MS	STY:79.9663@APES(0.5000)DT(0.5000)GDEDQDQER;
APESPPSADPALVAGPAEEAECPPPR	APES[79.9663]PPSADPALVAGPAEEAEC[57.0215]PPPR	R	Q	7	32	26	3	22C(57.0215),4S(79.9663)	sp|Q6EEV4-2|GL1AD_HUMAN	Q6EEV4-2	GL1AD_HUMAN	POLR2M	Isoform 5 of DNA-directed RNA polymerase II subunit GRINL1A, isoforms 4/5		sp|Q6EEV4|GL1AD_HUMAN	2	0	MS/MS	STY:79.9663@APES(0.9309)PPS(0.0691)ADPALVAGPAEEAECPPPR;
APEYITSNYDSDAMSSSYESYDEEEEDGK	APEYIT[79.9663]SNYDSDAMSSSYES[79.9663]Y[79.9663]DEEEEDGK	K	G	105	133	29	3	20S(79.9663),21Y(79.9663),6T(79.9663)	sp|Q8N556-2|AFAP1_HUMAN	Q8N556-2	AFAP1_HUMAN	AFAP1	Isoform 2 of Actin filament-associated protein 1		sp|Q8N556|AFAP1_HUMAN	1	0	MS/MS	STY:79.9663@APEY(0.0508)IT(0.5238)S(0.5238)NY(0.0221)DS(0.0207)DAMS(0.0298)S(0.0298)S(0.0298)Y(0.4265)ES(0.6715)Y(0.6715)DEEEEDGK;
APGLSSKAK	APGLS[79.9663]S[79.9663]KAK	K	S	1129	1137	9	2	5S(79.9663),6S(79.9663)	sp|Q14008-2|CKAP5_HUMAN	Q14008-2	CKAP5_HUMAN	CKAP5	Isoform 2 of Cytoskeleton-associated protein 5		sp|Q14008-3|CKAP5_HUMAN, sp|Q14008|CKAP5_HUMAN	1	3.74985E7	MS/MS	STY:79.9663@APGLS(1.0000)S(1.0000)KAK;
APGYPSSPVTTASGTTLR	APGYPSSPVTTASGTT[79.9663]LR	R	L	2234	2251	18	2	16T(79.9663)	sp|Q9HCK8-2|CHD8_HUMAN	Q9HCK8-2	CHD8_HUMAN	CHD8	Isoform 2 of Chromodomain-helicase-DNA-binding protein 8		sp|Q9HCK8|CHD8_HUMAN	1	7.13408e+06	MS/MS	STY:79.9663@APGY(0.0990)PS(0.0990)S(0.0990)PVT(0.0070)T(0.0092)AS(0.0092)GT(0.0092)T(0.6684)LR;
APIDTSDVEEK	APIDTS[79.9663]DVEEK	K	A	217	227	11	2	6S(79.9663)	sp|Q06265-3|EXOS9_HUMAN	Q06265-3	EXOS9_HUMAN	EXOSC9	Isoform 3 of Exosome complex component RRP45		sp|Q06265-2|EXOS9_HUMAN, sp|Q06265-4|EXOS9_HUMAN, sp|Q06265|EXOS9_HUMAN	4	2.32996224E8	MS/MS	STY:79.9663@APIDT(0.0537)S(0.9463)DVEEK;
APIDTSDVEEK	APIDT[79.9663]SDVEEK	K	A	217	227	11	2	5T(79.9663)	sp|Q06265-3|EXOS9_HUMAN	Q06265-3	EXOS9_HUMAN	EXOSC9	Isoform 3 of Exosome complex component RRP45		sp|Q06265-2|EXOS9_HUMAN, sp|Q06265-4|EXOS9_HUMAN, sp|Q06265|EXOS9_HUMAN	6	2.32996224E8	MS/MS	STY:79.9663@APIDT(0.5000)S(0.5000)DVEEK;
APKPPTDGSTSPTSTPSEDQEALGK	APKPPTDGSTSPTSTPS[79.9663]EDQEALGK	R	K	435	459	25	3	17S(79.9663)	sp|Q8NHM5-2|KDM2B_HUMAN	Q8NHM5-2	KDM2B_HUMAN	KDM2B	Isoform 2 of Lysine-specific demethylase 2B		sp|Q8NHM5-3|KDM2B_HUMAN, sp|Q8NHM5-4|KDM2B_HUMAN, sp|Q8NHM5-5|KDM2B_HUMAN, sp|Q8NHM5|KDM2B_HUMAN	1	0	MS/MS	STY:79.9663@APKPPT(0.0408)DGS(0.0566)T(0.0566)S(0.0566)PT(0.0566)S(0.0566)T(0.0566)PS(0.6197)EDQEALGK;
APKPPTDGSTSPTSTPSEDQEALGK	APKPPTDGSTS[79.9663]PTSTPSEDQEALGK	R	K	435	459	25	3	11S(79.9663)	sp|Q8NHM5-2|KDM2B_HUMAN	Q8NHM5-2	KDM2B_HUMAN	KDM2B	Isoform 2 of Lysine-specific demethylase 2B		sp|Q8NHM5-3|KDM2B_HUMAN, sp|Q8NHM5-4|KDM2B_HUMAN, sp|Q8NHM5-5|KDM2B_HUMAN, sp|Q8NHM5|KDM2B_HUMAN	1	1.5894272E7	MS/MS	STY:79.9663@APKPPT(0.0137)DGS(0.0137)T(0.0137)S(0.9198)PT(0.0141)S(0.0088)T(0.0083)PS(0.0080)EDQEALGK;
APKPPTDGSTSPTSTPSEDQEALGK	APKPPTDGS[79.9663]TSPTSTPSEDQEALGK	R	K	435	459	25	3	9S(79.9663)	sp|Q8NHM5-2|KDM2B_HUMAN	Q8NHM5-2	KDM2B_HUMAN	KDM2B	Isoform 2 of Lysine-specific demethylase 2B		sp|Q8NHM5-3|KDM2B_HUMAN, sp|Q8NHM5-4|KDM2B_HUMAN, sp|Q8NHM5-5|KDM2B_HUMAN, sp|Q8NHM5|KDM2B_HUMAN	1	1.8155388E7	MS/MS	STY:79.9663@APKPPT(0.0028)DGS(0.1658)T(0.1658)S(0.1658)PT(0.1658)S(0.1658)T(0.1658)PS(0.0025)EDQEALGK;
APLVPPPPPPPPPPPPPLPDPTPPEPEEEILGSDDEEQEDPADYCK	APLVPPPPPPPPPPPPPLPDPTPPEPEEEILGS[79.9663]DDEEQEDPADYC[57.0215]K	K	G	31	76	46	4,5	33S(79.9663),45C(57.0215)	sp|P78362-2|SRPK2_HUMAN	P78362-2	SRPK2_HUMAN	SRPK2	Isoform 2 of SRSF protein kinase 2		sp|P78362|SRPK2_HUMAN	4	1.39573504E8	MS/MS	STY:79.9663@APLVPPPPPPPPPPPPPLPDPT(0.1909)PPEPEEEILGS(0.7588)DDEEQEDPADY(0.0503)CK;
APLVPPPPPPPPPPPPPLPDPTPPEPEEEILGSDDEEQEDPADYCK	APLVPPPPPPPPPPPPPLPDPT[79.9663]PPEPEEEILGSDDEEQEDPADYC[57.0215]K	K	G	31	76	46	5	22T(79.9663),45C(57.0215)	sp|P78362-2|SRPK2_HUMAN	P78362-2	SRPK2_HUMAN	SRPK2	Isoform 2 of SRSF protein kinase 2		sp|P78362|SRPK2_HUMAN	1	0	MS/MS	STY:79.9663@APLVPPPPPPPPPPPPPLPDPT(0.7482)PPEPEEEILGS(0.0891)DDEEQEDPADY(0.1627)CK;
APPGAPGPGPGSGAPGSQEEEEEPGLVEGDPGDGAIEDPELEAIK	APPGAPGPGPGSGAPGS[79.9663]QEEEEEPGLVEGDPGDGAIEDPELEAIK	R	A	79	123	45	3,4	17S(79.9663)	sp|Q86U42-2|PABP2_HUMAN	Q86U42-2	PABP2_HUMAN	PABPN1	Isoform 2 of Polyadenylate-binding protein 2		sp|Q86U42|PABP2_HUMAN	4	1.46524064E8	MS/MS	STY:79.9663@APPGAPGPGPGS(0.0563)GAPGS(0.9437)QEEEEEPGLVEGDPGDGAIEDPELEAIK;
APPGAPGPGPGSGAPGSQEEEEEPGLVEGDPGDGAIEDPELEAIK	APPGAPGPGPGS[79.9663]GAPGSQEEEEEPGLVEGDPGDGAIEDPELEAIK	R	A	79	123	45	4	12S(79.9663)	sp|Q86U42-2|PABP2_HUMAN	Q86U42-2	PABP2_HUMAN	PABPN1	Isoform 2 of Polyadenylate-binding protein 2		sp|Q86U42|PABP2_HUMAN	1	0	MS/MS	STY:79.9663@APPGAPGPGPGS(0.9439)GAPGS(0.0561)QEEEEEPGLVEGDPGDGAIEDPELEAIK;
APPPPISPTQLSDVSSPR	APPPPISPTQLS[79.9663]DVSS[79.9663]PR	K	S	278	295	18	3	12S(79.9663),16S(79.9663)	sp|Q9P0K7-2|RAI14_HUMAN	Q9P0K7-2	RAI14_HUMAN	RAI14	Isoform 2 of Ankycorbin		sp|Q9P0K7-3|RAI14_HUMAN, sp|Q9P0K7|RAI14_HUMAN	1	1.7266596E7	MS/MS	STY:79.9663@APPPPIS(0.1151)PT(0.0610)QLS(0.5788)DVS(0.5788)S(0.6664)PR;
APPPPISPTQLSDVSSPR	APPPPISPTQLS[79.9663]DVS[79.9663]SPR	K	S	278	295	18	3	12S(79.9663),15S(79.9663)	sp|Q9P0K7-2|RAI14_HUMAN	Q9P0K7-2	RAI14_HUMAN	RAI14	Isoform 2 of Ankycorbin		sp|Q9P0K7-3|RAI14_HUMAN, sp|Q9P0K7|RAI14_HUMAN	1	1.412993E7	MS/MS	STY:79.9663@APPPPIS(0.2108)PT(0.2108)QLS(0.5261)DVS(0.5261)S(0.5261)PR;
APPPPISPTQLSDVSSPR	APPPPISPT[79.9663]QLS[79.9663]DVS[79.9663]SPR	K	S	278	295	18	3	12S(79.9663),15S(79.9663),9T(79.9663)	sp|Q9P0K7-2|RAI14_HUMAN	Q9P0K7-2	RAI14_HUMAN	RAI14	Isoform 2 of Ankycorbin		sp|Q9P0K7-3|RAI14_HUMAN, sp|Q9P0K7|RAI14_HUMAN	1	0	MS/MS	STY:79.9663@APPPPIS(0.1571)PT(0.7349)QLS(0.7343)DVS(0.6868)S(0.6868)PR;
APPPPISPTQLSDVSSPR	APPPPIS[79.9663]PTQLSDVSSPR	K	S	278	295	18	3	7S(79.9663)	sp|Q9P0K7-2|RAI14_HUMAN	Q9P0K7-2	RAI14_HUMAN	RAI14	Isoform 2 of Ankycorbin		sp|Q9P0K7-3|RAI14_HUMAN, sp|Q9P0K7|RAI14_HUMAN	1	1.12246E7	MS/MS	STY:79.9663@APPPPIS(0.6435)PT(0.0133)QLS(0.1144)DVS(0.1144)S(0.1144)PR;
APPPPISPTQLSDVSSPR	APPPPIS[79.9663]PTQLSDVS[79.9663]SPR	K	S	278	295	18	3	15S(79.9663),7S(79.9663)	sp|Q9P0K7-2|RAI14_HUMAN	Q9P0K7-2	RAI14_HUMAN	RAI14	Isoform 2 of Ankycorbin		sp|Q9P0K7-3|RAI14_HUMAN, sp|Q9P0K7|RAI14_HUMAN	1	1.7056218E7	MS/MS	STY:79.9663@APPPPIS(0.5956)PT(0.0464)QLS(0.3007)DVS(0.5287)S(0.5287)PR;
APPPPISPTQLSDVSSPR	APPPPIS[79.9663]PT[79.9663]QLSDVSSPR	K	S	278	295	18	3	7S(79.9663),9T(79.9663)	sp|Q9P0K7-2|RAI14_HUMAN	Q9P0K7-2	RAI14_HUMAN	RAI14	Isoform 2 of Ankycorbin		sp|Q9P0K7-3|RAI14_HUMAN, sp|Q9P0K7|RAI14_HUMAN	2	0	MS/MS	STY:79.9663@APPPPIS(0.8725)PT(0.8798)QLS(0.0854)DVS(0.0854)S(0.0769)PR;
APPPPISPTQLSDVSSPR	APPPPIS[79.9663]PT[79.9663]QLS[79.9663]DVSSPR	K	S	278	295	18	3	12S(79.9663),7S(79.9663),9T(79.9663)	sp|Q9P0K7-2|RAI14_HUMAN	Q9P0K7-2	RAI14_HUMAN	RAI14	Isoform 2 of Ankycorbin		sp|Q9P0K7-3|RAI14_HUMAN, sp|Q9P0K7|RAI14_HUMAN	3	1.9561478E7	MS/MS	STY:79.9663@APPPPIS(0.6535)PT(0.6535)QLS(0.6654)DVS(0.5138)S(0.5138)PR;
APPQTHLPSGASSGTGSASATHGGGSPPGTR	APPQTHLPSGASSGTGSASATHGGGSPPGT[79.9663]R	R	G	88	118	31	3,4	30T(79.9663)	sp|P46379-2|BAG6_HUMAN	P46379-2	BAG6_HUMAN	BAG6	Isoform 2 of Large proline-rich protein BAG6		sp|P46379-3|BAG6_HUMAN, sp|P46379-4|BAG6_HUMAN, sp|P46379-5|BAG6_HUMAN, sp|P46379|BAG6_HUMAN	4	1.39682256E8	MS/MS	STY:79.9663@APPQT(0.0078)HLPS(0.0080)GAS(0.0090)S(0.0092)GT(0.0132)GS(0.0091)AS(0.0076)AT(0.0064)HGGGS(0.0077)PPGT(0.9220)R;
APPQTHLPSGASSGTGSASATHGGGSPPGTR	APPQTHLPSGASSGTGSASATHGGGS[79.9663]PPGTR	R	G	88	118	31	3,4	26S(79.9663)	sp|P46379-2|BAG6_HUMAN	P46379-2	BAG6_HUMAN	BAG6	Isoform 2 of Large proline-rich protein BAG6		sp|P46379-3|BAG6_HUMAN, sp|P46379-4|BAG6_HUMAN, sp|P46379-5|BAG6_HUMAN, sp|P46379|BAG6_HUMAN	3	0	MS/MS	STY:79.9663@APPQT(0.0122)HLPS(0.0239)GAS(0.0205)S(0.0215)GT(0.0093)GS(0.0085)AS(0.0116)AT(0.0116)HGGGS(0.8736)PPGT(0.0072)R;
APPQTHLPSGASSGTGSASATHGGGSPPGTR	APPQTHLPSGASSGTGSASAT[79.9663]HGGGSPPGTR	R	G	88	118	31	3	21T(79.9663)	sp|P46379-2|BAG6_HUMAN	P46379-2	BAG6_HUMAN	BAG6	Isoform 2 of Large proline-rich protein BAG6		sp|P46379-3|BAG6_HUMAN, sp|P46379-4|BAG6_HUMAN, sp|P46379-5|BAG6_HUMAN, sp|P46379|BAG6_HUMAN	2	2.0294792E8	MS/MS	STY:79.9663@APPQT(0.0569)HLPS(0.1803)GAS(0.0209)S(0.0209)GT(0.0048)GS(0.0048)AS(0.0048)AT(0.6876)HGGGS(0.0095)PPGT(0.0095)R;
APPQTHLPSGASSGTGSASATHGGGSPPGTR	APPQTHLPSGASSGTGSAS[79.9663]ATHGGGSPPGTR	R	G	88	118	31	3	19S(79.9663)	sp|P46379-2|BAG6_HUMAN	P46379-2	BAG6_HUMAN	BAG6	Isoform 2 of Large proline-rich protein BAG6		sp|P46379-3|BAG6_HUMAN, sp|P46379-4|BAG6_HUMAN, sp|P46379-5|BAG6_HUMAN, sp|P46379|BAG6_HUMAN	1	0	MS/MS	STY:79.9663@APPQT(0.0242)HLPS(0.0040)GAS(0.0040)S(0.0040)GT(0.0040)GS(0.0040)AS(0.2836)AT(0.2836)HGGGS(0.1146)PPGT(0.2739)R;
APPTPPPSTDTAPQPDSSLEILPEEEDEGADS	APPT[79.9663]PPPSTDTAPQPDSSLEILPEEEDEGADS[79.9663]	R	-	584	615	32	3	32S(79.9663),4T(79.9663)	sp|Q9HA65-2|TBC17_HUMAN	Q9HA65-2	TBC17_HUMAN	TBC1D17	Isoform 2 of TBC1 domain family member 17		sp|Q9HA65|TBC17_HUMAN	1	3.0966898E7	MS/MS	STY:79.9663@APPT(0.4554)PPPS(0.4554)T(0.0367)DT(0.0367)APQPDS(0.1230)S(0.3551)LEILPEEEDEGADS(0.5375);
APQESQVVVEGGSGEGQGSPSQLLSDDETK	APQESQVVVEGGSGEGQGSPS[79.9663]QLLSDDETK	K	D	1103	1132	30	3	21S(79.9663)	sp|Q66K14-2|TBC9B_HUMAN	Q66K14-2	TBC9B_HUMAN	TBC1D9B	Isoform 2 of TBC1 domain family member 9B		sp|Q66K14|TBC9B_HUMAN	1	6.3225624E7	MS/MS	STY:79.9663@APQES(0.0892)QVVVEGGS(0.0151)GEGQGS(0.0115)PS(0.8588)QLLS(0.0102)DDET(0.0153)K;
APQQQPPPQQPPPPQPPPQQPPPPPSYSPAR	APQQQPPPQQPPPPQPPPQQPPPPPSYS[79.9663]PAR	R	N	691	721	31	3,4	28S(79.9663)	sp|Q9BUJ2-2|HNRL1_HUMAN	Q9BUJ2-2	HNRL1_HUMAN	HNRNPUL1	Isoform 2 of Heterogeneous nuclear ribonucleoprotein U-like protein 1		sp|Q9BUJ2-3|HNRL1_HUMAN, sp|Q9BUJ2-4|HNRL1_HUMAN, sp|Q9BUJ2-5|HNRL1_HUMAN, sp|Q9BUJ2|HNRL1_HUMAN	9	4.789952E8	MS/MS	STY:79.9663@APQQQPPPQQPPPPQPPPQQPPPPPS(0.0285)Y(0.0285)S(0.9430)PAR;
APQQQPPPQQPPPPQPPPQQPPPPPSYSPAR	APQQQPPPQQPPPPQPPPQQPPPPPSY[79.9663]SPAR	R	N	691	721	31	3,4	27Y(79.9663)	sp|Q9BUJ2-2|HNRL1_HUMAN	Q9BUJ2-2	HNRL1_HUMAN	HNRNPUL1	Isoform 2 of Heterogeneous nuclear ribonucleoprotein U-like protein 1		sp|Q9BUJ2-3|HNRL1_HUMAN, sp|Q9BUJ2-4|HNRL1_HUMAN, sp|Q9BUJ2-5|HNRL1_HUMAN, sp|Q9BUJ2|HNRL1_HUMAN	9	3.8740432E8	MS/MS	STY:79.9663@APQQQPPPQQPPPPQPPPQQPPPPPS(0.1094)Y(0.8508)S(0.0398)PAR;
APQQQPPPQQPPPPQPPPQQPPPPPSYSPAR	APQQQPPPQQPPPPQPPPQQPPPPPS[79.9663]YSPAR	R	N	691	721	31	3,4	26S(79.9663)	sp|Q9BUJ2-2|HNRL1_HUMAN	Q9BUJ2-2	HNRL1_HUMAN	HNRNPUL1	Isoform 2 of Heterogeneous nuclear ribonucleoprotein U-like protein 1		sp|Q9BUJ2-3|HNRL1_HUMAN, sp|Q9BUJ2-4|HNRL1_HUMAN, sp|Q9BUJ2-5|HNRL1_HUMAN, sp|Q9BUJ2|HNRL1_HUMAN	24	5.5499917E8	MS/MS	STY:79.9663@APQQQPPPQQPPPPQPPPQQPPPPPS(0.9145)Y(0.0427)S(0.0427)PAR;
APQTSSSPPPVR	APQTSSS[79.9663]PPPVR	R	R	690	701	12	2	7S(79.9663)	sp|Q8IYB3|SRRM1_HUMAN	Q8IYB3	SRRM1_HUMAN	SRRM1	Serine/arginine repetitive matrix protein 1		sp|Q8IYB3-2|SRRM1_HUMAN	12	1.14563635E9	MS/MS	STY:79.9663@APQT(0.0185)S(0.0185)S(0.0190)S(0.9440)PPPVR;
APQTSSSPPPVR	APQTSS[79.9663]SPPPVR	R	R	690	701	12	2	6S(79.9663)	sp|Q8IYB3|SRRM1_HUMAN	Q8IYB3	SRRM1_HUMAN	SRRM1	Serine/arginine repetitive matrix protein 1		sp|Q8IYB3-2|SRRM1_HUMAN	6	1.14563635E9	MS/MS	STY:79.9663@APQT(0.0179)S(0.0181)S(0.9015)S(0.0625)PPPVR;
APQTSSSPPPVR	APQTSS[79.9663]S[79.9663]PPPVR	R	R	690	701	12	2	6S(79.9663),7S(79.9663)	sp|Q8IYB3|SRRM1_HUMAN	Q8IYB3	SRRM1_HUMAN	SRRM1	Serine/arginine repetitive matrix protein 1		sp|Q8IYB3-2|SRRM1_HUMAN	13	1.18076429E9	MS/MS	STY:79.9663@APQT(0.0553)S(0.0553)S(0.9447)S(0.9448)PPPVR;
APQTSSSPPPVR	APQTS[79.9663]SSPPPVR	R	R	690	701	12	2	5S(79.9663)	sp|Q8IYB3|SRRM1_HUMAN	Q8IYB3	SRRM1_HUMAN	SRRM1	Serine/arginine repetitive matrix protein 1		sp|Q8IYB3-2|SRRM1_HUMAN	4	1.14563635E9	MS/MS	STY:79.9663@APQT(0.0185)S(0.9418)S(0.0199)S(0.0199)PPPVR;
APQTSSSPPPVR	APQTS[79.9663]SS[79.9663]PPPVR	R	R	690	701	12	2	5S(79.9663),7S(79.9663)	sp|Q8IYB3|SRRM1_HUMAN	Q8IYB3	SRRM1_HUMAN	SRRM1	Serine/arginine repetitive matrix protein 1		sp|Q8IYB3-2|SRRM1_HUMAN	6	2.11328784E8	MS/MS	STY:79.9663@APQT(0.0542)S(0.9458)S(0.0542)S(0.9458)PPPVR;
APQTSSSPPPVR	APQTS[79.9663]S[79.9663]SPPPVR	R	R	690	701	12	2	5S(79.9663),6S(79.9663)	sp|Q8IYB3|SRRM1_HUMAN	Q8IYB3	SRRM1_HUMAN	SRRM1	Serine/arginine repetitive matrix protein 1		sp|Q8IYB3-2|SRRM1_HUMAN	9	1.11783757E9	MS/MS	STY:79.9663@APQT(0.0399)S(0.6987)S(0.6307)S(0.6307)PPPVR;
APQTSSSPPPVR	APQT[79.9663]SSSPPPVR	R	R	690	701	12	2	4T(79.9663)	sp|Q8IYB3|SRRM1_HUMAN	Q8IYB3	SRRM1_HUMAN	SRRM1	Serine/arginine repetitive matrix protein 1		sp|Q8IYB3-2|SRRM1_HUMAN	13	1.14563635E9	MS/MS	STY:79.9663@APQT(0.9421)S(0.0193)S(0.0193)S(0.0193)PPPVR;
APQTSSSPPPVR	APQT[79.9663]SSS[79.9663]PPPVR	R	R	690	701	12	2	4T(79.9663),7S(79.9663)	sp|Q8IYB3|SRRM1_HUMAN	Q8IYB3	SRRM1_HUMAN	SRRM1	Serine/arginine repetitive matrix protein 1		sp|Q8IYB3-2|SRRM1_HUMAN	6	1.11863245E9	MS/MS	STY:79.9663@APQT(0.6306)S(0.6306)S(0.0399)S(0.6988)PPPVR;
APQTSSSPPPVR	APQT[79.9663]SS[79.9663]SPPPVR	R	R	690	701	12	2	4T(79.9663),6S(79.9663)	sp|Q8IYB3|SRRM1_HUMAN	Q8IYB3	SRRM1_HUMAN	SRRM1	Serine/arginine repetitive matrix protein 1		sp|Q8IYB3-2|SRRM1_HUMAN	3	0	MS/MS	STY:79.9663@APQT(0.7020)S(0.0702)S(0.6714)S(0.5563)PPPVR;
APQTSSSPPPVR	APQT[79.9663]S[79.9663]SSPPPVR	R	R	690	701	12	2,3	4T(79.9663),5S(79.9663)	sp|Q8IYB3|SRRM1_HUMAN	Q8IYB3	SRRM1_HUMAN	SRRM1	Serine/arginine repetitive matrix protein 1		sp|Q8IYB3-2|SRRM1_HUMAN	21	1.15183603E9	MS/MS	STY:79.9663@APQT(0.9328)S(0.9328)S(0.0672)S(0.0672)PPPVR;
APSDSSLGTPSDGRPELR	APSDSSLGT[79.9663]PS[79.9663]DGRPELR	R	G	294	311	18	2	11S(79.9663),9T(79.9663)	sp|Q15642-2|CIP4_HUMAN	Q15642-2	CIP4_HUMAN	TRIP10	Isoform 2 of Cdc42-interacting protein 4		sp|Q15642-3|CIP4_HUMAN, sp|Q15642-4|CIP4_HUMAN, sp|Q15642-5|CIP4_HUMAN, sp|Q15642|CIP4_HUMAN	1	0	MS/MS	STY:79.9663@APS(0.5285)DS(0.1321)S(0.1321)LGT(0.5688)PS(0.6384)DGRPELR;
APSDTGSLSPPWDQDR	APSDTGSLS[79.9663]PPWDQDR	R	R	588	603	16	2	9S(79.9663)	sp|Q96PC5-10|MIA2_HUMAN	Q96PC5-10	MIA2_HUMAN	MIA2	Isoform 9 of Melanoma inhibitory activity protein 2		sp|Q96PC5-11|MIA2_HUMAN, sp|Q96PC5-12|MIA2_HUMAN, sp|Q96PC5-13|MIA2_HUMAN, sp|Q96PC5-14|MIA2_HUMAN, sp|Q96PC5-5|MIA2_HUMAN, sp|Q96PC5-6|MIA2_HUMAN, sp|Q96PC5-7|MIA2_HUMAN, sp|Q96PC5-8|MIA2_HUMAN, sp|Q96PC5-9|MIA2_HUMAN, sp|Q96PC5|MIA2_HUMAN	2	5.208644E7	MS/MS	STY:79.9663@APS(0.0192)DT(0.0200)GS(0.0200)LS(0.9407)PPWDQDR;
APSDTGSLSPPWDQDR	APSDTGS[79.9663]LS[79.9663]PPWDQDR	R	R	588	603	16	2	7S(79.9663),9S(79.9663)	sp|Q96PC5-10|MIA2_HUMAN	Q96PC5-10	MIA2_HUMAN	MIA2	Isoform 9 of Melanoma inhibitory activity protein 2		sp|Q96PC5-11|MIA2_HUMAN, sp|Q96PC5-12|MIA2_HUMAN, sp|Q96PC5-13|MIA2_HUMAN, sp|Q96PC5-14|MIA2_HUMAN, sp|Q96PC5-5|MIA2_HUMAN, sp|Q96PC5-6|MIA2_HUMAN, sp|Q96PC5-7|MIA2_HUMAN, sp|Q96PC5-8|MIA2_HUMAN, sp|Q96PC5-9|MIA2_HUMAN, sp|Q96PC5|MIA2_HUMAN	4	0	MS/MS	STY:79.9663@APS(0.0570)DT(0.0643)GS(0.9393)LS(0.9393)PPWDQDR;
APSDTGSLSPPWDQDR	APSDT[79.9663]GSLSPPWDQDR	R	R	588	603	16	2	5T(79.9663)	sp|Q96PC5-10|MIA2_HUMAN	Q96PC5-10	MIA2_HUMAN	MIA2	Isoform 9 of Melanoma inhibitory activity protein 2		sp|Q96PC5-11|MIA2_HUMAN, sp|Q96PC5-12|MIA2_HUMAN, sp|Q96PC5-13|MIA2_HUMAN, sp|Q96PC5-14|MIA2_HUMAN, sp|Q96PC5-5|MIA2_HUMAN, sp|Q96PC5-6|MIA2_HUMAN, sp|Q96PC5-7|MIA2_HUMAN, sp|Q96PC5-8|MIA2_HUMAN, sp|Q96PC5-9|MIA2_HUMAN, sp|Q96PC5|MIA2_HUMAN	1	0	MS/MS	STY:79.9663@APS(0.0089)DT(0.3304)GS(0.3304)LS(0.3304)PPWDQDR;
APSDTGSLSPPWDQDR	APSDT[79.9663]GS[79.9663]LSPPWDQDR	R	R	588	603	16	2	5T(79.9663),7S(79.9663)	sp|Q96PC5-10|MIA2_HUMAN	Q96PC5-10	MIA2_HUMAN	MIA2	Isoform 9 of Melanoma inhibitory activity protein 2		sp|Q96PC5-11|MIA2_HUMAN, sp|Q96PC5-12|MIA2_HUMAN, sp|Q96PC5-13|MIA2_HUMAN, sp|Q96PC5-14|MIA2_HUMAN, sp|Q96PC5-5|MIA2_HUMAN, sp|Q96PC5-6|MIA2_HUMAN, sp|Q96PC5-7|MIA2_HUMAN, sp|Q96PC5-8|MIA2_HUMAN, sp|Q96PC5-9|MIA2_HUMAN, sp|Q96PC5|MIA2_HUMAN	1	0	MS/MS	STY:79.9663@APS(0.1635)DT(0.8907)GS(0.8907)LS(0.0552)PPWDQDR;
APSEEELHGDQTDFGQGSQSPQK	APSEEELHGDQTDFGQGS[79.9663]QSPQK	K	Q	68	90	23	3	18S(79.9663)	sp|Q8TE77-2|SSH3_HUMAN	Q8TE77-2	SSH3_HUMAN	SSH3	Isoform 2 of Protein phosphatase Slingshot homolog 3		sp|Q8TE77-4|SSH3_HUMAN, sp|Q8TE77|SSH3_HUMAN	3	5.4674696E7	MS/MS	STY:79.9663@APS(0.0277)EEELHGDQT(0.0183)DFGQGS(0.9207)QS(0.0333)PQK;
APSPPPTASNSSNSQSEK	APSPPPT[79.9663]ASNSSNSQSEK	R	E	375	392	18	2	7T(79.9663)	sp|Q8N108|MIER1_HUMAN	Q8N108	MIER1_HUMAN	MIER1	Mesoderm induction early response protein 1		sp|Q8N108-12|MIER1_HUMAN, sp|Q8N108-13|MIER1_HUMAN, sp|Q8N108-14|MIER1_HUMAN, sp|Q8N108-15|MIER1_HUMAN, sp|Q8N108-16|MIER1_HUMAN, sp|Q8N108-17|MIER1_HUMAN, sp|Q8N108-18|MIER1_HUMAN, sp|Q8N108-19|MIER1_HUMAN	1	2.68107792E8	MS/MS	STY:79.9663@APS(0.0787)PPPT(0.3020)AS(0.3020)NS(0.3020)S(0.0051)NS(0.0051)QS(0.0051)EK;
APSPTAEQPPGGGDSAR	APSPT[79.9663]AEQPPGGGDSAR	R	R	4	20	17	2	5T(79.9663)	sp|Q15742-2|NAB2_HUMAN	Q15742-2	NAB2_HUMAN	NAB2	Isoform 2 of NGFI-A-binding protein 2		sp|Q15742-3|NAB2_HUMAN, sp|Q15742|NAB2_HUMAN	1	2.2532692E7	MS/MS	STY:79.9663@APS(0.0493)PT(0.9238)AEQPPGGGDS(0.0269)AR;
APSTSPSFEGTQETYTVAHEENVR	APSTSPSFEGTQETY[79.9663]T[79.9663]VAHEENVR	R	F	76	99	24	3	15Y(79.9663),16T(79.9663)	sp|Q9BUT9|MCRI2_HUMAN	Q9BUT9	MCRI2_HUMAN	MCRIP2	MAPK regulated corepressor interacting protein 2			1	0	MS/MS	STY:79.9663@APS(0.2159)T(0.2159)S(0.2159)PS(0.2159)FEGT(0.0752)QET(0.0752)Y(0.4930)T(0.4930)VAHEENVR;
APSTSPSFEGTQETYTVAHEENVR	APSTSPSFEGT[79.9663]QETYTVAHEENVR	R	F	76	99	24	3	11T(79.9663)	sp|Q9BUT9|MCRI2_HUMAN	Q9BUT9	MCRI2_HUMAN	MCRIP2	MAPK regulated corepressor interacting protein 2			1	0	MS/MS	STY:79.9663@APS(0.0105)T(0.0105)S(0.0105)PS(0.0105)FEGT(0.9258)QET(0.0107)Y(0.0107)T(0.0107)VAHEENVR;
APSVANVGSHCDLSLK	APSVANVGSHC[57.0215]DLS[79.9663]LK	R	I	2142	2157	16	2	11C(57.0215),14S(79.9663)	sp|P21333-2|FLNA_HUMAN	P21333-2	FLNA_HUMAN	FLNA	Isoform 2 of Filamin-A		sp|P21333|FLNA_HUMAN	2	0	MS/MS	STY:79.9663@APS(0.4706)VANVGS(0.0504)HCDLS(0.4790)LK;
APSDSSLGTPSDGRPELR	APS[79.9663]DSS[79.9663]LGTPSDGRPELR	R	G	294	311	18	2	3S(79.9663),6S(79.9663)	sp|Q15642-2|CIP4_HUMAN	Q15642-2	CIP4_HUMAN	TRIP10	Isoform 2 of Cdc42-interacting protein 4		sp|Q15642-3|CIP4_HUMAN, sp|Q15642-4|CIP4_HUMAN, sp|Q15642-5|CIP4_HUMAN, sp|Q15642|CIP4_HUMAN	2	1.19213264E8	MS/MS	STY:79.9663@APS(0.7133)DS(0.6038)S(0.6232)LGT(0.0306)PS(0.0291)DGRPELR;
APSDSSLGTPSDGRPELR	APS[79.9663]DS[79.9663]SLGTPSDGRPELR	R	G	294	311	18	2	3S(79.9663),5S(79.9663)	sp|Q15642-2|CIP4_HUMAN	Q15642-2	CIP4_HUMAN	TRIP10	Isoform 2 of Cdc42-interacting protein 4		sp|Q15642-3|CIP4_HUMAN, sp|Q15642-4|CIP4_HUMAN, sp|Q15642-5|CIP4_HUMAN, sp|Q15642|CIP4_HUMAN	1	1.1640488E8	MS/MS	STY:79.9663@APS(0.6739)DS(0.5830)S(0.5830)LGT(0.0800)PS(0.0800)DGRPELR;
APSDTGSLSPPWDQDR	APS[79.9663]DTGSLS[79.9663]PPWDQDR	R	R	588	603	16	2	3S(79.9663),9S(79.9663)	sp|Q96PC5-10|MIA2_HUMAN	Q96PC5-10	MIA2_HUMAN	MIA2	Isoform 9 of Melanoma inhibitory activity protein 2		sp|Q96PC5-11|MIA2_HUMAN, sp|Q96PC5-12|MIA2_HUMAN, sp|Q96PC5-13|MIA2_HUMAN, sp|Q96PC5-14|MIA2_HUMAN, sp|Q96PC5-5|MIA2_HUMAN, sp|Q96PC5-6|MIA2_HUMAN, sp|Q96PC5-7|MIA2_HUMAN, sp|Q96PC5-8|MIA2_HUMAN, sp|Q96PC5-9|MIA2_HUMAN, sp|Q96PC5|MIA2_HUMAN	3	1.79839584E8	MS/MS	STY:79.9663@APS(0.9314)DT(0.0686)GS(0.0686)LS(0.9314)PPWDQDR;
APSDTGSLSPPWDQDR	APS[79.9663]DTGS[79.9663]LSPPWDQDR	R	R	588	603	16	2	3S(79.9663),7S(79.9663)	sp|Q96PC5-10|MIA2_HUMAN	Q96PC5-10	MIA2_HUMAN	MIA2	Isoform 9 of Melanoma inhibitory activity protein 2		sp|Q96PC5-11|MIA2_HUMAN, sp|Q96PC5-12|MIA2_HUMAN, sp|Q96PC5-13|MIA2_HUMAN, sp|Q96PC5-14|MIA2_HUMAN, sp|Q96PC5-5|MIA2_HUMAN, sp|Q96PC5-6|MIA2_HUMAN, sp|Q96PC5-7|MIA2_HUMAN, sp|Q96PC5-8|MIA2_HUMAN, sp|Q96PC5-9|MIA2_HUMAN, sp|Q96PC5|MIA2_HUMAN	1	0	MS/MS	STY:79.9663@APS(0.8491)DT(0.2139)GS(0.8441)LS(0.0928)PPWDQDR;
APSDTGSLSPPWDQDR	APS[79.9663]DT[79.9663]GSLSPPWDQDR	R	R	588	603	16	2	3S(79.9663),5T(79.9663)	sp|Q96PC5-10|MIA2_HUMAN	Q96PC5-10	MIA2_HUMAN	MIA2	Isoform 9 of Melanoma inhibitory activity protein 2		sp|Q96PC5-11|MIA2_HUMAN, sp|Q96PC5-12|MIA2_HUMAN, sp|Q96PC5-13|MIA2_HUMAN, sp|Q96PC5-14|MIA2_HUMAN, sp|Q96PC5-5|MIA2_HUMAN, sp|Q96PC5-6|MIA2_HUMAN, sp|Q96PC5-7|MIA2_HUMAN, sp|Q96PC5-8|MIA2_HUMAN, sp|Q96PC5-9|MIA2_HUMAN, sp|Q96PC5|MIA2_HUMAN	4	1.76187216E8	MS/MS	STY:79.9663@APS(0.9053)DT(0.9053)GS(0.1065)LS(0.0829)PPWDQDR;
APSEEELHGDQTDFGQGSQSPQK	APS[79.9663]EEELHGDQTDFGQGSQSPQK	K	Q	68	90	23	3	3S(79.9663)	sp|Q8TE77-2|SSH3_HUMAN	Q8TE77-2	SSH3_HUMAN	SSH3	Isoform 2 of Protein phosphatase Slingshot homolog 3		sp|Q8TE77-4|SSH3_HUMAN, sp|Q8TE77|SSH3_HUMAN	1	3.5624616E7	MS/MS	STY:79.9663@APS(0.3789)EEELHGDQT(0.3789)DFGQGS(0.1211)QS(0.1211)PQK;
APSPGAYK	APS[79.9663]PGAYK	R	T	643	650	8	2	3S(79.9663)	sp|P54259|ATN1_HUMAN	P54259	ATN1_HUMAN	ATN1	Atrophin-1			1	1.2660861E7	MS/MS	STY:79.9663@APS(0.5000)PGAY(0.5000)K;
APSPPLSQVFQTR	APS[79.9663]PPLSQVFQTR	R	A	387	399	13	2	3S(79.9663)	sp|Q9NRA8-2|4ET_HUMAN	Q9NRA8-2	4ET_HUMAN	EIF4ENIF1	Isoform 2 of Eukaryotic translation initiation factor 4E transporter		sp|Q9NRA8-3|4ET_HUMAN, sp|Q9NRA8|4ET_HUMAN	3	0	MS/MS	STY:79.9663@APS(0.9444)PPLS(0.0278)QVFQT(0.0278)R;
APSPPPTASNSSNSQSEK	APS[79.9663]PPPTASNSSNSQSEK	R	E	375	392	18	2	3S(79.9663)	sp|Q8N108|MIER1_HUMAN	Q8N108	MIER1_HUMAN	MIER1	Mesoderm induction early response protein 1		sp|Q8N108-12|MIER1_HUMAN, sp|Q8N108-13|MIER1_HUMAN, sp|Q8N108-14|MIER1_HUMAN, sp|Q8N108-15|MIER1_HUMAN, sp|Q8N108-16|MIER1_HUMAN, sp|Q8N108-17|MIER1_HUMAN, sp|Q8N108-18|MIER1_HUMAN, sp|Q8N108-19|MIER1_HUMAN	11	2.63250496E8	MS/MS	STY:79.9663@APS(0.9434)PPPT(0.0094)AS(0.0094)NS(0.0094)S(0.0094)NS(0.0094)QS(0.0094)EK;
APSPTAEQPPGGGDSAR	APS[79.9663]PTAEQPPGGGDSAR	R	R	4	20	17	2	3S(79.9663)	sp|Q15742-2|NAB2_HUMAN	Q15742-2	NAB2_HUMAN	NAB2	Isoform 2 of NGFI-A-binding protein 2		sp|Q15742-3|NAB2_HUMAN, sp|Q15742|NAB2_HUMAN	3	0	MS/MS	STY:79.9663@APS(0.9320)PT(0.0387)AEQPPGGGDS(0.0294)AR;
APSPTGPALISGASPVHCAADGTVELK	APS[79.9663]PT[79.9663]GPALISGASPVHC[57.0215]AADGTVELK	K	A	832	858	27	3	18C(57.0215),3S(79.9663),5T(79.9663)	sp|Q76L83|ASXL2_HUMAN	Q76L83	ASXL2_HUMAN	ASXL2	Putative Polycomb group protein ASXL2			1	2.2911328E7	MS/MS	STY:79.9663@APS(0.7345)PT(0.7336)GPALIS(0.1541)GAS(0.1411)PVHCAADGT(0.2368)VELK;
APSQSESEPEK	APS[79.9663]QSESEPEK	K	A	1281	1291	11	2	3S(79.9663)	sp|O75970-2|MPDZ_HUMAN	O75970-2	MPDZ_HUMAN	MPDZ	Isoform 2 of Multiple PDZ domain protein		sp|O75970-3|MPDZ_HUMAN, sp|O75970-5|MPDZ_HUMAN, sp|O75970|MPDZ_HUMAN	1	0	MS/MS	STY:79.9663@APS(0.9434)QS(0.0286)ES(0.0281)EPEK;
APSTSPSFEGTQETYTVAHEENVR	APS[79.9663]T[79.9663]SPSFEGTQETYTVAHEENVR	R	F	76	99	24	3	3S(79.9663),4T(79.9663)	sp|Q9BUT9|MCRI2_HUMAN	Q9BUT9	MCRI2_HUMAN	MCRIP2	MAPK regulated corepressor interacting protein 2			5	2.9776564E7	MS/MS	STY:79.9663@APS(0.6301)T(0.6301)S(0.6301)PS(0.0347)FEGT(0.0200)QET(0.0194)Y(0.0177)T(0.0177)VAHEENVR;
APSVANVGSHCDLSLK	APS[79.9663]VANVGSHC[57.0215]DLSLK	R	I	2142	2157	16	2	11C(57.0215),3S(79.9663)	sp|P21333-2|FLNA_HUMAN	P21333-2	FLNA_HUMAN	FLNA	Isoform 2 of Filamin-A		sp|P21333|FLNA_HUMAN	17	6.48928E8	MS/MS	STY:79.9663@APS(0.9434)VANVGS(0.0275)HCDLS(0.0291)LK;
APVPGTPDSLSSGSSR	APVPGT[79.9663]PDSLSSGSSR	K	D	277	292	16	2	6T(79.9663)	sp|Q9UJZ1-2|STML2_HUMAN	Q9UJZ1-2	STML2_HUMAN	STOML2	Isoform 2 of Stomatin-like protein 2, mitochondrial		sp|Q9UJZ1|STML2_HUMAN	2	2.1753776E7	MS/MS	STY:79.9663@APVPGT(0.5630)PDS(0.0074)LS(0.1074)S(0.1074)GS(0.1074)S(0.1074)R;
APVPQQAPSPQAAPQPQQVAQPLPAQPPALAQPQYQSPQQPPQTR	APVPQQAPSPQAAPQPQQVAQPLPAQPPALAQPQYQSPQQPPQT[79.9663]R	K	W	283	327	45	4	44T(79.9663)	sp|Q9BYJ9|YTHD1_HUMAN	Q9BYJ9	YTHD1_HUMAN	YTHDF1	YTH domain-containing family protein 1		sp|Q9BYJ9-2|YTHD1_HUMAN	1	0	MS/MS	STY:79.9663@APVPQQAPS(0.2613)PQAAPQPQQVAQPLPAQPPALAQPQY(0.0324)QS(0.0544)PQQPPQT(0.6519)R;
APVPQQAPSPQAAPQPQQVAQPLPAQPPALAQPQYQSPQQPPQTR	APVPQQAPSPQAAPQPQQVAQPLPAQPPALAQPQY[79.9663]QSPQQPPQTR	K	W	283	327	45	4	35Y(79.9663)	sp|Q9BYJ9|YTHD1_HUMAN	Q9BYJ9	YTHD1_HUMAN	YTHDF1	YTH domain-containing family protein 1		sp|Q9BYJ9-2|YTHD1_HUMAN	1	3.0272672E7	MS/MS	STY:79.9663@APVPQQAPS(0.2667)PQAAPQPQQVAQPLPAQPPALAQPQY(0.3939)QS(0.0107)PQQPPQT(0.3287)R;
APVPSTCSSTFPEELSPPSHQAK	APVPS[79.9663]TC[57.0215]SSTFPEELSPPSHQAK	K	R	154	176	23	3	5S(79.9663),7C(57.0215)	sp|Q14980-2|NUMA1_HUMAN	Q14980-2	NUMA1_HUMAN	NUMA1	Isoform 2 of Nuclear mitotic apparatus protein 1		sp|Q14980-3|NUMA1_HUMAN, sp|Q14980-4|NUMA1_HUMAN, sp|Q14980-5|NUMA1_HUMAN, sp|Q14980|NUMA1_HUMAN	1	1.5897514E7	MS/MS	STY:79.9663@APVPS(0.4689)T(0.4689)CS(0.0118)S(0.0118)T(0.0109)FPEELS(0.0096)PPS(0.0183)HQAK;
APVQPQQSPAAAPGGTDEK	APVQPQQSPAAAPGGT[79.9663]DEK	K	P	9	27	19	2	16T(79.9663)	sp|Q13200|PSMD2_HUMAN	Q13200	PSMD2_HUMAN	PSMD2	26S proteasome non-ATPase regulatory subunit 2			3	5.4665453E8	MS/MS	STY:79.9663@APVQPQQS(0.0552)PAAAPGGT(0.9448)DEK;
APVQPQQSPAAAPGGTDEK	APVQPQQS[79.9663]PAAAPGGTDEK	K	P	9	27	19	2,3	8S(79.9663)	sp|Q13200|PSMD2_HUMAN	Q13200	PSMD2_HUMAN	PSMD2	26S proteasome non-ATPase regulatory subunit 2			13	5.8998138E8	MS/MS	STY:79.9663@APVQPQQS(0.9470)PAAAPGGT(0.0530)DEK;
APVSSTESVIQSNTPTPPPSQPLNETAEEESR	APVSSTESVIQSNTPT[79.9663]PPPS[79.9663]QPLNETAEEESR	K	I	884	915	32	3	16T(79.9663),20S(79.9663)	sp|Q9HC35|EMAL4_HUMAN	Q9HC35	EMAL4_HUMAN	EML4	Echinoderm microtubule-associated protein-like 4		sp|Q9HC35-2|EMAL4_HUMAN	1	2.79617984E8	MS/MS	STY:79.9663@APVS(0.0314)S(0.0314)T(0.0314)ES(0.0456)VIQS(0.0121)NT(0.0182)PT(0.8105)PPPS(0.8131)QPLNET(0.1198)AEEES(0.0866)R;
APVSSTESVIQSNTPTPPPSQPLNETAEEESR	APVSSTESVIQSNT[79.9663]PTPPPS[79.9663]QPLNETAEEESR	K	I	884	915	32	3	14T(79.9663),20S(79.9663)	sp|Q9HC35|EMAL4_HUMAN	Q9HC35	EMAL4_HUMAN	EML4	Echinoderm microtubule-associated protein-like 4		sp|Q9HC35-2|EMAL4_HUMAN	1	0	MS/MS	STY:79.9663@APVS(0.0268)S(0.0268)T(0.0268)ES(0.0390)VIQS(0.0152)NT(0.5103)PT(0.5103)PPPS(0.7293)QPLNET(0.0641)AEEES(0.0517)R;
APVSSTESVIQSNTPTPPPSQPLNETAEEESR	APVSSTESVIQSNT[79.9663]PT[79.9663]PPPSQPLNETAEEESR	K	I	884	915	32	3,4	14T(79.9663),16T(79.9663)	sp|Q9HC35|EMAL4_HUMAN	Q9HC35	EMAL4_HUMAN	EML4	Echinoderm microtubule-associated protein-like 4		sp|Q9HC35-2|EMAL4_HUMAN	3	5.730056E7	MS/MS	STY:79.9663@APVS(0.0532)S(0.0532)T(0.0532)ES(0.0191)VIQS(0.0346)NT(0.8513)PT(0.8513)PPPS(0.0346)QPLNET(0.0262)AEEES(0.0235)R;
APVSSTESVIQSNTPTPPPSQPLNETAEEESR	APVSSTESVIQS[79.9663]NTPT[79.9663]PPPSQPLNETAEEESR	K	I	884	915	32	4	12S(79.9663),16T(79.9663)	sp|Q9HC35|EMAL4_HUMAN	Q9HC35	EMAL4_HUMAN	EML4	Echinoderm microtubule-associated protein-like 4		sp|Q9HC35-2|EMAL4_HUMAN	1	5.730056E7	MS/MS	STY:79.9663@APVS(0.0107)S(0.0107)T(0.0107)ES(0.0108)VIQS(0.6898)NT(0.0135)PT(0.6471)PPPS(0.1523)QPLNET(0.1613)AEEES(0.2929)R;
APVSSTESVIQSNTPTPPPSQPLNETAEEESR	APVSSTES[79.9663]VIQSNTPTPPPS[79.9663]QPLNETAEEESR	K	I	884	915	32	4	20S(79.9663),8S(79.9663)	sp|Q9HC35|EMAL4_HUMAN	Q9HC35	EMAL4_HUMAN	EML4	Echinoderm microtubule-associated protein-like 4		sp|Q9HC35-2|EMAL4_HUMAN	1	0	MS/MS	STY:79.9663@APVS(0.0135)S(0.0135)T(0.0135)ES(0.4598)VIQS(0.0603)NT(0.2516)PT(0.2177)PPPS(0.3234)QPLNET(0.3234)AEEES(0.3234)R;
APVSSTESVIQSNTPTPPPSQPLNETAEEESR	APVSST[79.9663]ES[79.9663]VIQSNTPTPPPSQPLNETAEEESR	K	I	884	915	32	3	6T(79.9663),8S(79.9663)	sp|Q9HC35|EMAL4_HUMAN	Q9HC35	EMAL4_HUMAN	EML4	Echinoderm microtubule-associated protein-like 4		sp|Q9HC35-2|EMAL4_HUMAN	1	2.82849408E8	MS/MS	STY:79.9663@APVS(0.0111)S(0.0111)T(0.7056)ES(0.6671)VIQS(0.1329)NT(0.0661)PT(0.0661)PPPS(0.1199)QPLNET(0.0905)AEEES(0.1297)R;
APVSSTESVIQSNTPTPPPSQPLNETAEEESR	APVS[79.9663]STESVIQSNTPT[79.9663]PPPSQPLNETAEEESR	K	I	884	915	32	3	16T(79.9663),4S(79.9663)	sp|Q9HC35|EMAL4_HUMAN	Q9HC35	EMAL4_HUMAN	EML4	Echinoderm microtubule-associated protein-like 4		sp|Q9HC35-2|EMAL4_HUMAN	1	2.82849408E8	MS/MS	STY:79.9663@APVS(0.3528)S(0.3528)T(0.3528)ES(0.3528)VIQS(0.0592)NT(0.0117)PT(0.4869)PPPS(0.0088)QPLNET(0.0110)AEEES(0.0110)R;
APVSSTESVIQSNTPTPPPSQPLNETAEEESR	APVS[79.9663]S[79.9663]TESVIQSNTPTPPPSQPLNETAEEESR	K	I	884	915	32	3	4S(79.9663),5S(79.9663)	sp|Q9HC35|EMAL4_HUMAN	Q9HC35	EMAL4_HUMAN	EML4	Echinoderm microtubule-associated protein-like 4		sp|Q9HC35-2|EMAL4_HUMAN	3	2.82849408E8	MS/MS	STY:79.9663@APVS(0.4678)S(0.4678)T(0.4678)ES(0.1297)VIQS(0.1297)NT(0.1297)PT(0.0541)PPPS(0.0541)QPLNET(0.0459)AEEES(0.0531)R;
APYQENDGYCPDLELSDSEAESDGNK	APYQENDGYC[57.0215]PDLELSDS[79.9663]EAESDGNK	R	E	759	784	26	3	10C(57.0215),18S(79.9663)	sp|Q92613|JADE3_HUMAN	Q92613	JADE3_HUMAN	JADE3	Protein Jade-3			1	2.101931E7	MS/MS	STY:79.9663@APY(0.0478)QENDGY(0.0208)CPDLELS(0.0375)DS(0.8729)EAES(0.0210)DGNK;
APYQENDGYCPDLELSDSEAESDGNK	APYQENDGYC[57.0215]PDLELSDS[79.9663]EAES[79.9663]DGNK	R	E	759	784	26	3	10C(57.0215),18S(79.9663),22S(79.9663)	sp|Q92613|JADE3_HUMAN	Q92613	JADE3_HUMAN	JADE3	Protein Jade-3			1	0	MS/MS	STY:79.9663@APY(0.4281)QENDGY(0.4281)CPDLELS(0.0327)DS(0.5554)EAES(0.5556)DGNK;
APYSPTTSK	APYSPT[79.9663]TSK	K	E	765	773	9	2	6T(79.9663)	sp|Q96JH7|VCIP1_HUMAN	Q96JH7	VCIP1_HUMAN	VCPIP1	Deubiquitinating protein VCPIP1			1	8563488	MS/MS	STY:79.9663@APY(0.0221)S(0.0221)PT(0.3186)T(0.3186)S(0.3186)K;
AQAAAPASVPAQAPK	AQAAAPAS[79.9663]VPAQAPK	K	R	135	149	15	2	8S(79.9663)	sp|P47914|RL29_HUMAN	P47914	RL29_HUMAN	RPL29	Large ribosomal subunit protein eL29			1	8895062	MS/MS	STY:79.9663@AQAAAPAS(1.0000)VPAQAPK;
AQAVSEEEEEEEGK	AQAVS[79.9663]EEEEEEEGK	K	S	78	91	14	2	5S(79.9663)	sp|Q9GZR7-2|DDX24_HUMAN	Q9GZR7-2	DDX24_HUMAN	DDX24	Isoform 2 of ATP-dependent RNA helicase DDX24		sp|Q9GZR7|DDX24_HUMAN	3	0	MS/MS	STY:79.9663@AQAVS(1.0000)EEEEEEEGK;
AQCETLSPDGLPEEQPQTTK	AQC[57.0215]ET[79.9663]LSPDGLPEEQPQTTK	R	L	3640	3659	20	3	3C(57.0215),5T(79.9663)	sp|Q7Z6Z7-2|HUWE1_HUMAN	Q7Z6Z7-2	HUWE1_HUMAN	HUWE1	Isoform 2 of E3 ubiquitin-protein ligase HUWE1		sp|Q7Z6Z7-3|HUWE1_HUMAN, sp|Q7Z6Z7|HUWE1_HUMAN	1	1.5567298E7	MS/MS	STY:79.9663@AQCET(0.4796)LS(0.4796)PDGLPEEQPQT(0.0200)T(0.0207)K;
AQDPAAATASSPSTPDPASAPSTTPASPATPAQPSTSGSASSDAGSGSR	AQDPAAATASSPSTPDPASAPSTTPASPATPAQPSTSGS[79.9663]ASSDAGSGSR	K	R	88	136	49	4	39S(79.9663)	sp|Q9NRR5|UBQL4_HUMAN	Q9NRR5	UBQL4_HUMAN	UBQLN4	Ubiquilin-4			1	0	MS/MS	STY:79.9663@AQDPAAAT(0.0492)AS(0.0222)S(0.0222)PS(0.1130)T(0.1130)PDPAS(0.1130)APS(0.0565)T(0.0565)T(0.0565)PAS(0.0565)PAT(0.0029)PAQPS(0.0034)T(0.0034)S(0.0034)GS(0.2995)AS(0.0125)S(0.0044)DAGS(0.0049)GS(0.0069)R;
AQDPAAATASSPSTPDPASAPSTTPASPATPAQPSTSGSASSDAGSGSR	AQDPAAATASSPSTPDPASAPSTTPASPAT[79.9663]PAQPSTSGSASSDAGSGSR	K	R	88	136	49	4	30T(79.9663)	sp|Q9NRR5|UBQL4_HUMAN	Q9NRR5	UBQL4_HUMAN	UBQLN4	Ubiquilin-4			1	1.7085494E7	MS/MS	STY:79.9663@AQDPAAAT(0.0131)AS(0.0131)S(0.0131)PS(0.0051)T(0.0051)PDPAS(0.0029)APS(0.0029)T(0.0029)T(0.0032)PAS(0.0032)PAT(0.7636)PAQPS(0.0283)T(0.0283)S(0.0148)GS(0.0219)AS(0.0224)S(0.0224)DAGS(0.0214)GS(0.0120)R;
AQDPAAATASSPSTPDPASAPSTTPASPATPAQPSTSGSASSDAGSGSR	AQDPAAATASS[79.9663]PSTPDPASAPSTTPASPAT[79.9663]PAQPSTSGSASSDAGSGSR	K	R	88	136	49	4	11S(79.9663),30T(79.9663)	sp|Q9NRR5|UBQL4_HUMAN	Q9NRR5	UBQL4_HUMAN	UBQLN4	Ubiquilin-4			1	0	MS/MS	STY:79.9663@AQDPAAAT(0.0079)AS(0.0079)S(0.2559)PS(0.2559)T(0.2559)PDPAS(0.2559)APS(0.0161)T(0.0161)T(0.0161)PAS(0.0161)PAT(0.3244)PAQPS(0.1823)T(0.1823)S(0.0340)GS(0.0877)AS(0.0258)S(0.0258)DAGS(0.0173)GS(0.0168)R;
AQDPAAATASSPSTPDPASAPSTTPASPATPAQPSTSGSASSDAGSGSR	AQDPAAAT[79.9663]ASSPSTPDPASAPSTTPAS[79.9663]PATPAQPSTSGSASSDAGSGSR	K	R	88	136	49	4	27S(79.9663),8T(79.9663)	sp|Q9NRR5|UBQL4_HUMAN	Q9NRR5	UBQL4_HUMAN	UBQLN4	Ubiquilin-4			1	0	MS/MS	STY:79.9663@AQDPAAAT(0.2502)AS(0.2502)S(0.2502)PS(0.2502)T(0.2502)PDPAS(0.0046)APS(0.0049)T(0.0049)T(0.0162)PAS(0.4576)PAT(0.0559)PAQPS(0.0332)T(0.0225)S(0.0225)GS(0.0225)AS(0.0225)S(0.0225)DAGS(0.0193)GS(0.0397)R;
AQEAEAQSEDDDEDTEEEQGEEK	AQEAEAQS[79.9663]EDDDEDT[79.9663]EEEQGEEK	K	E	273	295	23	3	15T(79.9663),8S(79.9663)	sp|Q5C9Z4|NOM1_HUMAN	Q5C9Z4	NOM1_HUMAN	NOM1	Nucleolar MIF4G domain-containing protein 1			1	1.7273212E7	MS/MS	STY:79.9663@AQEAEAQS(1.0000)EDDDEDT(1.0000)EEEQGEEK;
AQENYEGSEEVSPPQTK	AQENYEGSEEVSPPQT[79.9663]K	R	D	2552	2568	17	2	16T(79.9663)	sp|Q93008-3|USP9X_HUMAN	Q93008-3	USP9X_HUMAN	USP9X	Isoform 2 of Probable ubiquitin carboxyl-terminal hydrolase FAF-X		sp|Q93008|USP9X_HUMAN	1	3.0183526E7	MS/MS	STY:79.9663@AQENY(0.0385)EGS(0.1447)EEVS(0.0274)PPQT(0.7893)K;
AQENYEGSEEVSPPQTK	AQENYEGS[79.9663]EEVSPPQTK	R	D	2552	2568	17	2	8S(79.9663)	sp|Q93008-3|USP9X_HUMAN	Q93008-3	USP9X_HUMAN	USP9X	Isoform 2 of Probable ubiquitin carboxyl-terminal hydrolase FAF-X		sp|Q93008|USP9X_HUMAN	1	3.0183526E7	MS/MS	STY:79.9663@AQENY(0.0991)EGS(0.8628)EEVS(0.0193)PPQT(0.0188)K;
AQETEAAPSQAPADEPEPESAAAQSQENQDTRPK	AQETEAAPSQAPADEPEPESAAAQSQENQDT[79.9663]RPK	K	V	120	153	34	3	31T(79.9663)	sp|Q9UNF1-2|MAGD2_HUMAN	Q9UNF1-2	MAGD2_HUMAN	MAGED2	Isoform 2 of Melanoma-associated antigen D2		sp|Q9UNF1|MAGD2_HUMAN	1	1.8208868E7	MS/MS	STY:79.9663@AQET(0.0188)EAAPS(0.0275)QAPADEPEPES(0.0565)AAAQS(0.0187)QENQDT(0.8784)RPK;
AQGEPVAGHESPK	AQGEPVAGHES[79.9663]PK	R	I	789	801	13	2,3	11S(79.9663)	sp|O94979-2|SC31A_HUMAN	O94979-2	SC31A_HUMAN	SEC31A	Isoform 2 of Protein transport protein Sec31A		sp|O94979-10|SC31A_HUMAN, sp|O94979-3|SC31A_HUMAN, sp|O94979-4|SC31A_HUMAN, sp|O94979-6|SC31A_HUMAN, sp|O94979-7|SC31A_HUMAN, sp|O94979-8|SC31A_HUMAN, sp|O94979-9|SC31A_HUMAN, sp|O94979|SC31A_HUMAN	11	5.22735424E8	MS/MS	STY:79.9663@AQGEPVAGHES(1.0000)PK;
AQGPAASAEEPKPVEAPAANSDQTVTVK	AQGPAASAEEPKPVEAPAANS[79.9663]DQTVTVK	K	E	199	226	28	3	21S(79.9663)	sp|P80723|BASP1_HUMAN	P80723	BASP1_HUMAN	BASP1	Brain acid soluble protein 1		sp|P80723-2|BASP1_HUMAN	1	1.4339172E7	MS/MS	STY:79.9663@AQGPAAS(0.0212)AEEPKPVEAPAANS(0.9403)DQT(0.0193)VT(0.0193)VK;
AQGPAASAEEPKPVEAPAANSDQTVTVK	AQGPAAS[79.9663]AEEPKPVEAPAANSDQTVTVK	K	E	199	226	28	3	7S(79.9663)	sp|P80723|BASP1_HUMAN	P80723	BASP1_HUMAN	BASP1	Brain acid soluble protein 1		sp|P80723-2|BASP1_HUMAN	3	4.6915032E7	MS/MS	STY:79.9663@AQGPAAS(0.9093)AEEPKPVEAPAANS(0.0284)DQT(0.0312)VT(0.0312)VK;
AQGQADESSENEEEEIELIPEK	AQGQADES[79.9663]S[79.9663]ENEEEEIELIPEK	R	H	453	474	22	3	8S(79.9663),9S(79.9663)	sp|Q9Y4A0|JERKL_HUMAN	Q9Y4A0	JERKL_HUMAN	JRKL	Jerky protein homolog-like			1	1.1861601E7	MS/MS	STY:79.9663@AQGQADES(1.0000)S(1.0000)ENEEEEIELIPEK;
AQLEPVASPAK	AQLEPVAS[79.9663]PAK	K	K	1428	1438	11	2	8S(79.9663)	sp|Q15149|PLEC_HUMAN	Q15149	PLEC_HUMAN	PLEC	Plectin		sp|Q15149-2|PLEC_HUMAN, sp|Q15149-3|PLEC_HUMAN, sp|Q15149-4|PLEC_HUMAN, sp|Q15149-5|PLEC_HUMAN, sp|Q15149-6|PLEC_HUMAN, sp|Q15149-7|PLEC_HUMAN, sp|Q15149-8|PLEC_HUMAN, sp|Q15149-9|PLEC_HUMAN	1	0	MS/MS	STY:79.9663@AQLEPVAS(1.0000)PAK;
AQLGINEDHSEGDEK	AQLGINEDHS[79.9663]EGDEK	R	S	211	225	15	2	10S(79.9663)	sp|Q69YQ0-2|CYTSA_HUMAN	Q69YQ0-2	CYTSA_HUMAN	SPECC1L	Isoform 2 of Cytospin-A		sp|Q69YQ0|CYTSA_HUMAN	1	0	MS/MS	STY:79.9663@AQLGINEDHS(1.0000)EGDEK;
AQLSPGIYDDTSAR	AQLS[79.9663]PGIYDDTSAR	K	R	1485	1498	14	2	4S(79.9663)	sp|O75376-2|NCOR1_HUMAN	O75376-2	NCOR1_HUMAN	NCOR1	Isoform 2 of Nuclear receptor corepressor 1		sp|O75376|NCOR1_HUMAN	1	9650515	MS/MS	STY:79.9663@AQLS(0.9345)PGIY(0.0188)DDT(0.0233)S(0.0233)AR;
AQPFGFIDSDTDAEEER	AQPFGFIDS[79.9663]DT[79.9663]DAEEER	R	I	321	337	17	2	11T(79.9663),9S(79.9663)	sp|Q14676-3|MDC1_HUMAN	Q14676-3	MDC1_HUMAN	MDC1	Isoform 3 of Mediator of DNA damage checkpoint protein 1		sp|Q14676-2|MDC1_HUMAN, sp|Q14676-4|MDC1_HUMAN, sp|Q14676|MDC1_HUMAN	4	1.07282632E8	MS/MS	STY:79.9663@AQPFGFIDS(1.0000)DT(1.0000)DAEEER;
AQPSMSPK	AQPSMS[79.9663]PK	K	K	138	145	8	2	6S(79.9663)	sp|Q969S3|ZN622_HUMAN	Q969S3	ZN622_HUMAN	ZNF622	Cytoplasmic 60S subunit biogenesis factor ZNF622			2	5.0608484E7	MS/MS	STY:79.9663@AQPS(0.0544)MS(0.9456)PK;
AQPSMSPK	AQPS[79.9663]MSPK	K	K	138	145	8	2	4S(79.9663)	sp|Q969S3|ZN622_HUMAN	Q969S3	ZN622_HUMAN	ZNF622	Cytoplasmic 60S subunit biogenesis factor ZNF622			2	5.0608484E7	MS/MS	STY:79.9663@AQPS(0.5000)MS(0.5000)PK;
AQQELVPPQQQASPPQLPK	AQQELVPPQQQAS[79.9663]PPQLPK	R	A	1057	1075	19	3	13S(79.9663)	sp|O15027-5|SC16A_HUMAN	O15027-5	SC16A_HUMAN	SEC16A	Isoform 5 of Protein transport protein Sec16A		sp|O15027-2|SC16A_HUMAN, sp|O15027-3|SC16A_HUMAN, sp|O15027-4|SC16A_HUMAN, sp|O15027|SC16A_HUMAN	21	2.23297856E8	MS/MS	STY:79.9663@AQQELVPPQQQAS(1.0000)PPQLPK;
AQQQEEQGSVNDVK	AQQQEEQGS[79.9663]VNDVK	K	E	535	548	14	2	9S(79.9663)	sp|Q9Y4W2-2|LAS1L_HUMAN	Q9Y4W2-2	LAS1L_HUMAN	LAS1L	Isoform 2 of Ribosomal biogenesis protein LAS1L		sp|Q9Y4W2-3|LAS1L_HUMAN, sp|Q9Y4W2|LAS1L_HUMAN	3	1.41964448E8	MS/MS	STY:79.9663@AQQQEEQGS(1.0000)VNDVK;
AQSLLSTDR	AQSLLST[79.9663]DR	R	E	12	20	9	2	7T(79.9663)	sp|O00231-2|PSD11_HUMAN	O00231-2	PSD11_HUMAN	PSMD11	Isoform 2 of 26S proteasome non-ATPase regulatory subunit 11		sp|O00231|PSD11_HUMAN	1	6629967	MS/MS	STY:79.9663@AQS(0.0310)LLS(0.0310)T(0.9381)DR;
AQSLVISPPAPSPR	AQSLVISPPAPS[79.9663]PR	K	K	573	586	14	2	12S(79.9663)	sp|P46013|KI67_HUMAN	P46013	KI67_HUMAN	MKI67	Proliferation marker protein Ki-67		sp|P46013-2|KI67_HUMAN	2	3.5557632E7	MS/MS	STY:79.9663@AQS(0.0228)LVIS(0.3094)PPAPS(0.6678)PR;
AQSLVISPPAPSPR	AQSLVIS[79.9663]PPAPSPR	K	K	573	586	14	2	7S(79.9663)	sp|P46013|KI67_HUMAN	P46013	KI67_HUMAN	MKI67	Proliferation marker protein Ki-67		sp|P46013-2|KI67_HUMAN	1	3.5944492E7	MS/MS	STY:79.9663@AQS(0.0175)LVIS(0.4913)PPAPS(0.4913)PR;
AQSLVISPPAPSPR	AQSLVIS[79.9663]PPAPS[79.9663]PR	K	K	573	586	14	2	12S(79.9663),7S(79.9663)	sp|P46013|KI67_HUMAN	P46013	KI67_HUMAN	MKI67	Proliferation marker protein Ki-67		sp|P46013-2|KI67_HUMAN	2	4.1519016E7	MS/MS	STY:79.9663@AQS(0.1105)LVIS(0.9447)PPAPS(0.9448)PR;
AQSNGSGNGSDSEMDTSSLER	AQSNGSGNGS[79.9663]DSEMDTSSLER	K	G	1125	1145	21	2	10S(79.9663)	sp|Q9NRY4|RHG35_HUMAN	Q9NRY4	RHG35_HUMAN	ARHGAP35	Rho GTPase-activating protein 35			1	0	MS/MS	STY:79.9663@AQS(0.0210)NGS(0.0210)GNGS(0.9202)DS(0.0097)EMDT(0.0094)S(0.0094)S(0.0094)LER;
AQSNGSGNGSDSEMDTSSLER	AQSNGS[79.9663]GNGSDSEMDTSSLER	K	G	1125	1145	21	2	6S(79.9663)	sp|Q9NRY4|RHG35_HUMAN	Q9NRY4	RHG35_HUMAN	ARHGAP35	Rho GTPase-activating protein 35			1	0	MS/MS	STY:79.9663@AQS(0.0094)NGS(0.3971)GNGS(0.3971)DS(0.1242)EMDT(0.0240)S(0.0240)S(0.0240)LER;
AQSSPASATFPVSVQEPPTK	AQSSPASAT[79.9663]FPVSVQEPPTK	R	P	518	537	20	3	9T(79.9663)	sp|P56524-2|HDAC4_HUMAN	P56524-2	HDAC4_HUMAN	HDAC4	Isoform 2 of Histone deacetylase 4		sp|P56524|HDAC4_HUMAN	1	0	MS/MS	STY:79.9663@AQS(0.0121)S(0.0121)PAS(0.0139)AT(0.9359)FPVS(0.0132)VQEPPT(0.0128)K;
AQSSPASATFPVSVQEPPTK	AQSSPAS[79.9663]ATFPVSVQEPPTK	R	P	518	537	20	3	7S(79.9663)	sp|P56524-2|HDAC4_HUMAN	P56524-2	HDAC4_HUMAN	HDAC4	Isoform 2 of Histone deacetylase 4		sp|P56524|HDAC4_HUMAN	1	2.3064664E7	MS/MS	STY:79.9663@AQS(0.0112)S(0.0112)PAS(0.4753)AT(0.4753)FPVS(0.0087)VQEPPT(0.0184)K;
AQSTDSLGTSGSLQSK	AQSTDSLGTSGSLQS[79.9663]K	R	A	405	420	16	2	15S(79.9663)	sp|Q15276-2|RABE1_HUMAN	Q15276-2	RABE1_HUMAN	RABEP1	Isoform 2 of Rab GTPase-binding effector protein 1		sp|Q15276|RABE1_HUMAN	1	1.9082128E7	MS/MS	STY:79.9663@AQS(0.3632)T(0.0162)DS(0.0162)LGT(0.0079)S(0.0079)GS(0.0079)LQS(0.5806)K;
AQSTDSLGTSGSLQSK	AQSTDSLGTSGS[79.9663]LQSK	R	A	405	420	16	2	12S(79.9663)	sp|Q15276-2|RABE1_HUMAN	Q15276-2	RABE1_HUMAN	RABEP1	Isoform 2 of Rab GTPase-binding effector protein 1		sp|Q15276|RABE1_HUMAN	1	0	MS/MS	STY:79.9663@AQS(0.0453)T(0.0702)DS(0.1074)LGT(0.1508)S(0.0067)GS(0.6081)LQS(0.0115)K;
AQSTDSLGTSGSLQSK	AQSTDS[79.9663]LGTSGSLQSK	R	A	405	420	16	2	6S(79.9663)	sp|Q15276-2|RABE1_HUMAN	Q15276-2	RABE1_HUMAN	RABEP1	Isoform 2 of Rab GTPase-binding effector protein 1		sp|Q15276|RABE1_HUMAN	1	1.251519E7	MS/MS	STY:79.9663@AQS(0.0098)T(0.0110)DS(0.9006)LGT(0.0196)S(0.0196)GS(0.0196)LQS(0.0196)K;
AQSYPDNHQEFSDYDNPIFEK	AQSYPDNHQEFS[79.9663]DYDNPIFEK	R	F	237	257	21	3	12S(79.9663)	sp|Q9Y2U5|M3K2_HUMAN	Q9Y2U5	M3K2_HUMAN	MAP3K2	Mitogen-activated protein kinase kinase kinase 2			3	2.6488896E7	MS/MS	STY:79.9663@AQS(0.0410)Y(0.0410)PDNHQEFS(0.8907)DY(0.0272)DNPIFEK;
AQSLVISPPAPSPR	AQS[79.9663]LVISPPAPSPR	K	K	573	586	14	2	3S(79.9663)	sp|P46013|KI67_HUMAN	P46013	KI67_HUMAN	MKI67	Proliferation marker protein Ki-67		sp|P46013-2|KI67_HUMAN	1	0	MS/MS	STY:79.9663@AQS(0.4900)LVIS(0.4900)PPAPS(0.0201)PR;
AQSNGSGNGSDSEMDTSSLER	AQS[79.9663]NGSGNGSDSEMDTSSLER	K	G	1125	1145	21	2	3S(79.9663)	sp|Q9NRY4|RHG35_HUMAN	Q9NRY4	RHG35_HUMAN	ARHGAP35	Rho GTPase-activating protein 35			1	0	MS/MS	STY:79.9663@AQS(0.6306)NGS(0.0311)GNGS(0.0959)DS(0.0959)EMDT(0.1035)S(0.0215)S(0.0215)LER;
AQSPGAVEEILDR	AQS[79.9663]PGAVEEILDR	R	E	7	19	13	2	3S(79.9663)	sp|Q9NYM9|BET1L_HUMAN	Q9NYM9	BET1L_HUMAN	BET1L	BET1-like protein			2	0	MS/MS	STY:79.9663@AQS(1.0000)PGAVEEILDR;
AQSPVSGPNVAHLTDGATLNDR	AQS[79.9663]PVSGPNVAHLTDGATLNDR	R	S	1040	1061	22	3	3S(79.9663)	sp|Q5THJ4-2|VP13D_HUMAN	Q5THJ4-2	VP13D_HUMAN	VPS13D	Isoform 2 of Intermembrane lipid transfer protein VPS13D		sp|Q5THJ4|VP13D_HUMAN	1	0	MS/MS	STY:79.9663@AQS(0.9426)PVS(0.0192)GPNVAHLT(0.0192)DGAT(0.0191)LNDR;
AQSSPAAPASLSAPEPASQAR	AQS[79.9663]SPAAPASLSAPEPASQAR	R	V	146	166	21	3	3S(79.9663)	sp|Q8WUI4-10|HDAC7_HUMAN	Q8WUI4-10	HDAC7_HUMAN	HDAC7	Isoform 10 of Histone deacetylase 7		sp|Q8WUI4-3|HDAC7_HUMAN, sp|Q8WUI4-4|HDAC7_HUMAN, sp|Q8WUI4-5|HDAC7_HUMAN, sp|Q8WUI4-6|HDAC7_HUMAN, sp|Q8WUI4-7|HDAC7_HUMAN, sp|Q8WUI4-8|HDAC7_HUMAN, sp|Q8WUI4|HDAC7_HUMAN	1	0	MS/MS	STY:79.9663@AQS(0.4728)S(0.4728)PAAPAS(0.0184)LS(0.0184)APEPAS(0.0177)QAR;
AQSSPASATFPVSVQEPPTK	AQS[79.9663]SPASATFPVSVQEPPTK	R	P	518	537	20	2	3S(79.9663)	sp|P56524-2|HDAC4_HUMAN	P56524-2	HDAC4_HUMAN	HDAC4	Isoform 2 of Histone deacetylase 4		sp|P56524|HDAC4_HUMAN	2	5.6225656E7	MS/MS	STY:79.9663@AQS(0.4140)S(0.4140)PAS(0.0668)AT(0.0651)FPVS(0.0170)VQEPPT(0.0231)K;
AQSTDSLGTSGSLQSK	AQS[79.9663]TDS[79.9663]LGTSGSLQSK	R	A	405	420	16	2	3S(79.9663),6S(79.9663)	sp|Q15276-2|RABE1_HUMAN	Q15276-2	RABE1_HUMAN	RABEP1	Isoform 2 of Rab GTPase-binding effector protein 1		sp|Q15276|RABE1_HUMAN	2	5.1757696E7	MS/MS	STY:79.9663@AQS(0.5905)T(0.5905)DS(0.7496)LGT(0.0174)S(0.0174)GS(0.0174)LQS(0.0174)K;
AQSTDSLGTSGSLQSK	AQS[79.9663]T[79.9663]DSLGTSGSLQSK	R	A	405	420	16	2	3S(79.9663),4T(79.9663)	sp|Q15276-2|RABE1_HUMAN	Q15276-2	RABE1_HUMAN	RABEP1	Isoform 2 of Rab GTPase-binding effector protein 1		sp|Q15276|RABE1_HUMAN	2	5.1757696E7	MS/MS	STY:79.9663@AQS(0.7351)T(0.5806)DS(0.5806)LGT(0.0172)S(0.0288)GS(0.0288)LQS(0.0288)K;
AQSYDIQAWK	AQS[79.9663]YDIQAWK	R	K	1313	1322	10	2	3S(79.9663)	sp|Q8WWQ0|PHIP_HUMAN	Q8WWQ0	PHIP_HUMAN	PHIP	PH-interacting protein			2	5.0553264E7	MS/MS	STY:79.9663@AQS(0.9444)Y(0.0556)DIQAWK;
AQSYPDNHQEFSDYDNPIFEK	AQS[79.9663]YPDNHQEFSDYDNPIFEK	R	F	237	257	21	3	3S(79.9663)	sp|Q9Y2U5|M3K2_HUMAN	Q9Y2U5	M3K2_HUMAN	MAP3K2	Mitogen-activated protein kinase kinase kinase 2			1	2.66355E7	MS/MS	STY:79.9663@AQS(0.3656)Y(0.3656)PDNHQEFS(0.2082)DY(0.0605)DNPIFEK;
AQTLPTSVVTITSESSPGK	AQTLPTSVVTITSES[79.9663]SPGK	R	R	2326	2344	19	2	15S(79.9663)	sp|Q01082|SPTB2_HUMAN	Q01082	SPTB2_HUMAN	SPTBN1	Spectrin beta chain, non-erythrocytic 1			1	1.46095248E8	MS/MS	STY:79.9663@AQT(0.0123)LPT(0.0132)S(0.0132)VVT(0.0072)IT(0.0074)S(0.0074)ES(0.4697)S(0.4697)PGK;
AQTLPTSVVTITSESSPGK	AQTLPTSVVTITS[79.9663]ESSPGK	R	R	2326	2344	19	2	13S(79.9663)	sp|Q01082|SPTB2_HUMAN	Q01082	SPTB2_HUMAN	SPTBN1	Spectrin beta chain, non-erythrocytic 1			1	1.46095248E8	MS/MS	STY:79.9663@AQT(0.0104)LPT(0.0108)S(0.0113)VVT(0.0117)IT(0.0149)S(0.9226)ES(0.0092)S(0.0092)PGK;
AQTLPTSVVTITSESSPGK	AQTLPTSVVTIT[79.9663]SESSPGK	R	R	2326	2344	19	2	12T(79.9663)	sp|Q01082|SPTB2_HUMAN	Q01082	SPTB2_HUMAN	SPTBN1	Spectrin beta chain, non-erythrocytic 1			1	1.453268E8	MS/MS	STY:79.9663@AQT(0.0096)LPT(0.0107)S(0.0107)VVT(0.0079)IT(0.9368)S(0.0081)ES(0.0081)S(0.0081)PGK;
AQTPPGPSLSGSK	AQTPPGPSLSGS[79.9663]K	K	S	1001	1013	13	2	12S(79.9663)	sp|Q9UQ35|SRRM2_HUMAN	Q9UQ35	SRRM2_HUMAN	SRRM2	Serine/arginine repetitive matrix protein 2		sp|Q9UQ35-2|SRRM2_HUMAN	2	3.7173888E8	MS/MS	STY:79.9663@AQT(0.3323)PPGPS(0.0155)LS(0.0155)GS(0.6368)K;
AQTPPGPSLSGSK	AQTPPGPSLS[79.9663]GSK	K	S	1001	1013	13	2	10S(79.9663)	sp|Q9UQ35|SRRM2_HUMAN	Q9UQ35	SRRM2_HUMAN	SRRM2	Serine/arginine repetitive matrix protein 2		sp|Q9UQ35-2|SRRM2_HUMAN	1	3.7173888E8	MS/MS	STY:79.9663@AQT(0.0170)PPGPS(0.0170)LS(0.4830)GS(0.4830)K;
AQTPPGPSLSGSK	AQTPPGPS[79.9663]LSGSK	K	S	1001	1013	13	2	8S(79.9663)	sp|Q9UQ35|SRRM2_HUMAN	Q9UQ35	SRRM2_HUMAN	SRRM2	Serine/arginine repetitive matrix protein 2		sp|Q9UQ35-2|SRRM2_HUMAN	5	3.7173888E8	MS/MS	STY:79.9663@AQT(0.0398)PPGPS(0.9186)LS(0.0208)GS(0.0208)K;
AQTPPGPSLSGSK	AQTPPGPS[79.9663]LS[79.9663]GSK	K	S	1001	1013	13	2	10S(79.9663),8S(79.9663)	sp|Q9UQ35|SRRM2_HUMAN	Q9UQ35	SRRM2_HUMAN	SRRM2	Serine/arginine repetitive matrix protein 2		sp|Q9UQ35-2|SRRM2_HUMAN	3	7.4359408E7	MS/MS	STY:79.9663@AQT(0.1160)PPGPS(0.9076)LS(0.9076)GS(0.0687)K;
AQTPPGPSLSGSK	AQT[79.9663]PPGPSLSGSK	K	S	1001	1013	13	2	3T(79.9663)	sp|Q9UQ35|SRRM2_HUMAN	Q9UQ35	SRRM2_HUMAN	SRRM2	Serine/arginine repetitive matrix protein 2		sp|Q9UQ35-2|SRRM2_HUMAN	9	1.08687411E9	MS/MS	STY:79.9663@AQT(0.9442)PPGPS(0.0186)LS(0.0186)GS(0.0186)K;
AQTPPGPSLSGSK	AQT[79.9663]PPGPSLS[79.9663]GSK	K	S	1001	1013	13	2	10S(79.9663),3T(79.9663)	sp|Q9UQ35|SRRM2_HUMAN	Q9UQ35	SRRM2_HUMAN	SRRM2	Serine/arginine repetitive matrix protein 2		sp|Q9UQ35-2|SRRM2_HUMAN	1	0	MS/MS	STY:79.9663@AQT(0.6933)PPGPS(0.0553)LS(0.6257)GS(0.6257)K;
AQTPPGPSLSGSK	AQT[79.9663]PPGPS[79.9663]LSGSK	K	S	1001	1013	13	2	3T(79.9663),8S(79.9663)	sp|Q9UQ35|SRRM2_HUMAN	Q9UQ35	SRRM2_HUMAN	SRRM2	Serine/arginine repetitive matrix protein 2		sp|Q9UQ35-2|SRRM2_HUMAN	3	7.4359408E7	MS/MS	STY:79.9663@AQT(0.6381)PPGPS(0.5759)LS(0.5759)GS(0.2102)K;
AQTPPISSLPTSPSDEVGR	AQT[79.9663]PPISSLPT[79.9663]SPSDEVGR	R	R	2699	2717	19	2	11T(79.9663),3T(79.9663)	sp|Q15751|HERC1_HUMAN	Q15751	HERC1_HUMAN	HERC1	Probable E3 ubiquitin-protein ligase HERC1			1	1.6838478E7	MS/MS	STY:79.9663@AQT(0.5597)PPIS(0.0183)S(0.0227)LPT(0.4664)S(0.4664)PS(0.4664)DEVGR;
ARALGTEVIQLFPEKGNMGK	ARALGT[79.9663]EVIQLFPEKGNMGK	K	I	319	338	20	3	6T(79.9663)	sp|O95831-3|AIFM1_HUMAN	O95831-3	AIFM1_HUMAN	AIFM1	Isoform 3 of Apoptosis-inducing factor 1, mitochondrial		sp|O95831|AIFM1_HUMAN	1	0	MS/MS	STY:79.9663@ARALGT(1.0000)EVIQLFPEKGNMGK;
ARGDSEALDEES	ARGDSEALDEES[79.9663]	R	-	665	676	12	2	12S(79.9663)	sp|Q7Z4V5-3|HDGR2_HUMAN	Q7Z4V5-3	HDGR2_HUMAN	HDGFL2	Isoform 3 of Hepatoma-derived growth factor-related protein 2		sp|Q7Z4V5-2|HDGR2_HUMAN, sp|Q7Z4V5-4|HDGR2_HUMAN, sp|Q7Z4V5|HDGR2_HUMAN	1	3.6873388E7	MS/MS	STY:79.9663@ARGDS(0.1343)EALDEES(0.8657);
ARGDSEALDEES	ARGDS[79.9663]EALDEES	R	-	665	676	12	2	5S(79.9663)	sp|Q7Z4V5-3|HDGR2_HUMAN	Q7Z4V5-3	HDGR2_HUMAN	HDGFL2	Isoform 3 of Hepatoma-derived growth factor-related protein 2		sp|Q7Z4V5-2|HDGR2_HUMAN, sp|Q7Z4V5-4|HDGR2_HUMAN, sp|Q7Z4V5|HDGR2_HUMAN	2	4.4977148E7	MS/MS	STY:79.9663@ARGDS(0.9466)EALDEES(0.0534);
ARGLEVTDDSPK	ARGLEVT[79.9663]DDS[79.9663]PK	R	Y	483	494	12	2	10S(79.9663),7T(79.9663)	sp|P49588-2|SYAC_HUMAN	P49588-2	SYAC_HUMAN	AARS1	Isoform 2 of Alanine--tRNA ligase, cytoplasmic		sp|P49588|SYAC_HUMAN	2	7.392028E7	MS/MS	STY:79.9663@ARGLEVT(1.0000)DDS(1.0000)PK;
ARGSEDDDAQAQHPR	ARGS[79.9663]EDDDAQAQHPR	K	K	2371	2385	15	3	4S(79.9663)	sp|Q6UB99|ANR11_HUMAN	Q6UB99	ANR11_HUMAN	ANKRD11	Ankyrin repeat domain-containing protein 11			1	3.00814e+06	MS/MS	STY:79.9663@ARGS(1.0000)EDDDAQAQHPR;
ARSVSPPPK	ARS[79.9663]VS[79.9663]PPPK	K	R	312	320	9	2,3	3S(79.9663),5S(79.9663)	sp|Q13247|SRSF6_HUMAN	Q13247	SRSF6_HUMAN	SRSF6	Serine/arginine-rich splicing factor 6			36	4.01549389E9	MS/MS	STY:79.9663@ARS(1.0000)VS(1.0000)PPPK;
ASALLFSSDEEDQWNIPASQTHLASDSR	ASALLFSSDEEDQWNIPAS[79.9663]QTHLASDSR	K	S	613	640	28	3	19S(79.9663)	sp|Q641Q2-2|WAC2A_HUMAN	Q641Q2-2	WAC2A_HUMAN	WASHC2A	Isoform 2 of WASH complex subunit 2A	WASHC2C	sp|Q641Q2|WAC2A_HUMAN, sp|Q9Y4E1-4|WAC2C_HUMAN, sp|Q9Y4E1-5|WAC2C_HUMAN, sp|Q9Y4E1-6|WAC2C_HUMAN, sp|Q9Y4E1|WAC2C_HUMAN	1	0	MS/MS	STY:79.9663@AS(0.0145)ALLFS(0.2370)S(0.1844)DEEDQWNIPAS(0.5423)QT(0.0073)HLAS(0.0073)DS(0.0072)R;
ASAPERTPSPAPK	ASAPERT[79.9663]PS[79.9663]PAPK	K	R	252	264	13	2,3	7T(79.9663),9S(79.9663)	sp|Q63ZY6|NSN5C_HUMAN	Q63ZY6	NSN5C_HUMAN	NSUN5P2	Putative methyltransferase NSUN5C	NSUN5, NSUN5P1	sp|Q3KNT7-3|NSN5B_HUMAN, sp|Q63ZY6-6|NSN5C_HUMAN, sp|Q96P11-2|NSUN5_HUMAN	2	5.4205676E7	MS/MS	STY:79.9663@AS(0.1174)APERT(0.9412)PS(0.9414)PAPK;
ASAPSPNAQVACDHCLK	ASAPS[79.9663]PNAQVAC[57.0215]DHC[57.0215]LK	R	E	96	112	17	3	12C(57.0215),15C(57.0215),5S(79.9663)	sp|Q14258|TRI25_HUMAN	Q14258	TRI25_HUMAN	TRIM25	E3 ubiquitin/ISG15 ligase TRIM25			1	2.7557454E7	MS/MS	STY:79.9663@AS(0.2956)APS(0.7044)PNAQVACDHCLK;
ASASGSGAQVGGPISSGSSASSVTVTR	ASASGSGAQVGGPISSGSSASSVTVT[79.9663]R	K	S	598	624	27	3	26T(79.9663)	sp|P02545|LMNA_HUMAN	P02545	LMNA_HUMAN	LMNA	Prelamin-A/C		sp|P02545-3|LMNA_HUMAN, sp|P02545-4|LMNA_HUMAN, sp|P02545-5|LMNA_HUMAN	1	4.8237876E7	MS/MS	STY:79.9663@AS(0.0138)AS(0.0136)GS(0.0136)GAQVGGPIS(0.0213)S(0.0195)GS(0.0057)S(0.0057)AS(0.0057)S(0.0057)VT(0.0057)VT(0.8896)R;
ASASGSGAQVGGPISSGSSASSVTVTR	ASASGSGAQVGGPISSGSS[79.9663]ASSVTVTR	K	S	598	624	27	3	19S(79.9663)	sp|P02545|LMNA_HUMAN	P02545	LMNA_HUMAN	LMNA	Prelamin-A/C		sp|P02545-3|LMNA_HUMAN, sp|P02545-4|LMNA_HUMAN, sp|P02545-5|LMNA_HUMAN	1	4.8237876E7	MS/MS	STY:79.9663@AS(0.0317)AS(0.0288)GS(0.0303)GAQVGGPIS(0.0722)S(0.0198)GS(0.0049)S(0.7775)AS(0.0088)S(0.0088)VT(0.0086)VT(0.0086)R;
ASASGSGAQVGGPISSGSSASSVTVTR	ASASGSGAQVGGPISS[79.9663]GSSASSVTVTR	K	S	598	624	27	3	16S(79.9663)	sp|P02545|LMNA_HUMAN	P02545	LMNA_HUMAN	LMNA	Prelamin-A/C		sp|P02545-3|LMNA_HUMAN, sp|P02545-4|LMNA_HUMAN, sp|P02545-5|LMNA_HUMAN	1	0	MS/MS	STY:79.9663@AS(0.0081)AS(0.0089)GS(0.0089)GAQVGGPIS(0.0125)S(0.9009)GS(0.0122)S(0.0122)AS(0.0122)S(0.0122)VT(0.0059)VT(0.0058)R;
ASASGSGAQVGGPISSGSSASSVTVTR	ASASGSGAQVGGPIS[79.9663]SGSSASSVT[79.9663]VTR	K	S	598	624	27	3	15S(79.9663),24T(79.9663)	sp|P02545|LMNA_HUMAN	P02545	LMNA_HUMAN	LMNA	Prelamin-A/C		sp|P02545-3|LMNA_HUMAN, sp|P02545-4|LMNA_HUMAN, sp|P02545-5|LMNA_HUMAN	1	0	MS/MS	STY:79.9663@AS(0.1006)AS(0.1006)GS(0.1092)GAQVGGPIS(0.7480)S(0.0470)GS(0.0470)S(0.0470)AS(0.0129)S(0.0129)VT(0.7644)VT(0.0106)R;
ASASGSGAQVGGPISSGSSASSVTVTR	ASASGSGAQVGGPIS[79.9663]S[79.9663]GSSASSVTVTR	K	S	598	624	27	3	15S(79.9663),16S(79.9663)	sp|P02545|LMNA_HUMAN	P02545	LMNA_HUMAN	LMNA	Prelamin-A/C		sp|P02545-3|LMNA_HUMAN, sp|P02545-4|LMNA_HUMAN, sp|P02545-5|LMNA_HUMAN	1	0	MS/MS	STY:79.9663@AS(0.1133)AS(0.1133)GS(0.1133)GAQVGGPIS(0.7405)S(0.7405)GS(0.0280)S(0.0133)AS(0.0133)S(0.0415)VT(0.0415)VT(0.0415)R;
ASAVSELSPR	ASAVSELS[79.9663]PR	R	E	236	245	10	2	8S(79.9663)	sp|Q9Y2W1|TR150_HUMAN	Q9Y2W1	TR150_HUMAN	THRAP3	Thyroid hormone receptor-associated protein 3			6	4.55946816E8	MS/MS	STY:79.9663@AS(0.0274)AVS(0.0274)ELS(0.9452)PR;
ASAVSELSPR	ASAVS[79.9663]ELSPR	R	E	236	245	10	2	5S(79.9663)	sp|Q9Y2W1|TR150_HUMAN	Q9Y2W1	TR150_HUMAN	THRAP3	Thyroid hormone receptor-associated protein 3			5	6.4012824E7	MS/MS	STY:79.9663@AS(0.0255)AVS(0.8512)ELS(0.1233)PR;
ASAVSELSPRERSPALK	ASAVS[79.9663]ELS[79.9663]PRERSPALK	R	S	236	252	17	3	5S(79.9663),8S(79.9663)	sp|Q9Y2W1|TR150_HUMAN	Q9Y2W1	TR150_HUMAN	THRAP3	Thyroid hormone receptor-associated protein 3			1	4.1251956E7	MS/MS	STY:79.9663@AS(0.0925)AVS(0.6796)ELS(0.6140)PRERS(0.6140)PALK;
ASDLEDEESAAR	ASDLEDEES[79.9663]AAR	R	G	45	56	12	2	9S(79.9663)	sp|Q86VM9|ZCH18_HUMAN	Q86VM9	ZCH18_HUMAN	ZC3H18	Zinc finger CCCH domain-containing protein 18			1	0	MS/MS	STY:79.9663@AS(0.0798)DLEDEES(0.9202)AAR;
ASDPDEAGGPEGSEAVQSGTPEEPEPELEAEASK	ASDPDEAGGPEGSEAVQSGT[79.9663]PEEPEPELEAEASK	R	E	192	225	34	3	20T(79.9663)	sp|O60936-3|NOL3_HUMAN	O60936-3	NOL3_HUMAN	NOL3	Isoform 3 of Nucleolar protein 3		sp|O60936|NOL3_HUMAN	2	1.0535164E8	MS/MS	STY:79.9663@AS(0.1107)DPDEAGGPEGS(0.0122)EAVQS(0.0129)GT(0.7462)PEEPEPELEAEAS(0.1179)K;
ASDPDEAGGPEGSEAVQSGTPEEPEPELEAEASK	ASDPDEAGGPEGSEAVQS[79.9663]GTPEEPEPELEAEASK	R	E	192	225	34	3	18S(79.9663)	sp|O60936-3|NOL3_HUMAN	O60936-3	NOL3_HUMAN	NOL3	Isoform 3 of Nucleolar protein 3		sp|O60936|NOL3_HUMAN	2	1.0535164E8	MS/MS	STY:79.9663@AS(0.0129)DPDEAGGPEGS(0.0132)EAVQS(0.4807)GT(0.4807)PEEPEPELEAEAS(0.0126)K;
ASDPQSPPQVSR	ASDPQS[79.9663]PPQVSR	R	H	242	253	12	2	6S(79.9663)	sp|Q7L7X3-2|TAOK1_HUMAN	Q7L7X3-2	TAOK1_HUMAN	TAOK1	Isoform 2 of Serine/threonine-protein kinase TAO1		sp|Q7L7X3-3|TAOK1_HUMAN, sp|Q7L7X3|TAOK1_HUMAN	3	7.1892312E7	MS/MS	STY:79.9663@AS(0.0271)DPQS(0.9383)PPQVS(0.0346)R;
ASEAASPLPDSPGDK	ASEAASPLPDS[79.9663]PGDK	K	L	904	918	15	2	11S(79.9663)	sp|Q68CZ2-2|TENS3_HUMAN	Q68CZ2-2	TENS3_HUMAN	TNS3	Isoform 2 of Tensin-3		sp|Q68CZ2|TENS3_HUMAN	2	1.6559591E7	MS/MS	STY:79.9663@AS(0.0417)EAAS(0.0417)PLPDS(0.9166)PGDK;
ASEDTTSGSPPK	ASEDTTSGS[79.9663]PPK	R	K	456	467	12	2	9S(79.9663)	sp|Q9BZZ5-1|API5_HUMAN	Q9BZZ5-1	API5_HUMAN	API5	Isoform 1 of Apoptosis inhibitor 5		sp|Q9BZZ5-2|API5_HUMAN, sp|Q9BZZ5-5|API5_HUMAN, sp|Q9BZZ5-6|API5_HUMAN, sp|Q9BZZ5|API5_HUMAN	3	2.75128192E8	MS/MS	STY:79.9663@AS(0.0138)EDT(0.0139)T(0.0139)S(0.0141)GS(0.9443)PPK;
ASEDTTSGSPPKK	ASEDTTSGS[79.9663]PPKK	R	S	456	468	13	2	9S(79.9663)	sp|Q9BZZ5-1|API5_HUMAN	Q9BZZ5-1	API5_HUMAN	API5	Isoform 1 of Apoptosis inhibitor 5		sp|Q9BZZ5-2|API5_HUMAN, sp|Q9BZZ5-5|API5_HUMAN, sp|Q9BZZ5-6|API5_HUMAN, sp|Q9BZZ5|API5_HUMAN	4	9.51636E7	MS/MS	STY:79.9663@AS(0.0138)EDT(0.0138)T(0.0138)S(0.0138)GS(0.9447)PPKK;
ASEDTTSGSPPK	ASEDTTS[79.9663]GSPPK	R	K	456	467	12	2	7S(79.9663)	sp|Q9BZZ5-1|API5_HUMAN	Q9BZZ5-1	API5_HUMAN	API5	Isoform 1 of Apoptosis inhibitor 5		sp|Q9BZZ5-2|API5_HUMAN, sp|Q9BZZ5-5|API5_HUMAN, sp|Q9BZZ5-6|API5_HUMAN, sp|Q9BZZ5|API5_HUMAN	3	2.75128192E8	MS/MS	STY:79.9663@AS(0.0391)EDT(0.0130)T(0.0203)S(0.8421)GS(0.0855)PPK;
ASEDTTSGSPPKK	ASEDTTS[79.9663]GSPPKK	R	S	456	468	13	2	7S(79.9663)	sp|Q9BZZ5-1|API5_HUMAN	Q9BZZ5-1	API5_HUMAN	API5	Isoform 1 of Apoptosis inhibitor 5		sp|Q9BZZ5-2|API5_HUMAN, sp|Q9BZZ5-5|API5_HUMAN, sp|Q9BZZ5-6|API5_HUMAN, sp|Q9BZZ5|API5_HUMAN	2	7.9718608E7	MS/MS	STY:79.9663@AS(0.0143)EDT(0.0143)T(0.0189)S(0.5627)GS(0.3898)PPKK;
ASEDTTSGSPPKK	ASEDT[79.9663]TSGSPPKK	R	S	456	468	13	2	5T(79.9663)	sp|Q9BZZ5-1|API5_HUMAN	Q9BZZ5-1	API5_HUMAN	API5	Isoform 1 of Apoptosis inhibitor 5		sp|Q9BZZ5-2|API5_HUMAN, sp|Q9BZZ5-5|API5_HUMAN, sp|Q9BZZ5-6|API5_HUMAN, sp|Q9BZZ5|API5_HUMAN	1	7.9718608E7	MS/MS	STY:79.9663@AS(0.0100)EDT(0.3274)T(0.3274)S(0.3274)GS(0.0079)PPKK;
ASEIDQVVPAAQSSPINCEK	ASEIDQVVPAAQS[79.9663]SPINC[57.0215]EK	R	R	54	73	20	3	13S(79.9663),18C(57.0215)	sp|O94782|UBP1_HUMAN	O94782	UBP1_HUMAN	USP1	Ubiquitin carboxyl-terminal hydrolase 1			1	1.8994328E7	MS/MS	STY:79.9663@AS(0.1704)EIDQVVPAAQS(0.4148)S(0.4148)PINCEK;
ASETVSEASPGSTASQTGVPTQVVQQVQGTQQR	ASETVSEASPGSTASQT[79.9663]GVPTQVVQQVQGTQQR	R	L	112	144	33	3	17T(79.9663)	sp|P22670|RFX1_HUMAN	P22670	RFX1_HUMAN	RFX1	MHC class II regulatory factor RFX1			1	6.3029068E7	MS/MS	STY:79.9663@AS(0.0781)ET(0.2157)VS(0.1407)EAS(0.2387)PGS(0.0082)T(0.0082)AS(0.0047)QT(0.2928)GVPT(0.0081)QVVQQVQGT(0.0048)QQR;
ASETVSEASPGSTASQTGVPTQVVQQVQGTQQR	ASETVS[79.9663]EASPGSTASQTGVPTQVVQQVQGTQQR	R	L	112	144	33	3	6S(79.9663)	sp|P22670|RFX1_HUMAN	P22670	RFX1_HUMAN	RFX1	MHC class II regulatory factor RFX1			1	6.3029068E7	MS/MS	STY:79.9663@AS(0.0169)ET(0.0169)VS(0.2501)EAS(0.2501)PGS(0.1060)T(0.1060)AS(0.1017)QT(0.0911)GVPT(0.0240)QVVQQVQGT(0.0372)QQR;
ASGDPGASGMSPR	ASGDPGAS[79.9663]GMSPR	K	A	99	111	13	2	8S(79.9663)	sp|Q8NDT2|RB15B_HUMAN	Q8NDT2	RB15B_HUMAN	RBM15B	Putative RNA-binding protein 15B			2	3.8543856E7	MS/MS	STY:79.9663@AS(0.0179)GDPGAS(0.4911)GMS(0.4911)PR;
ASGQAFELILSPR	ASGQAFELILS[79.9663]PR	R	S	15	27	13	2	11S(79.9663)	sp|P16949-2|STMN1_HUMAN	P16949-2	STMN1_HUMAN	STMN1	Isoform 2 of Stathmin		sp|P16949|STMN1_HUMAN	3	5.7364072E7	MS/MS	STY:79.9663@AS(0.0567)GQAFELILS(0.9433)PR;
ASGSENEGDYNPGR	ASGS[79.9663]ENEGDYNPGR	K	K	1544	1557	14	2	4S(79.9663)	sp|Q02880-2|TOP2B_HUMAN	Q02880-2	TOP2B_HUMAN	TOP2B	Isoform Beta-1 of DNA topoisomerase 2-beta		sp|Q02880|TOP2B_HUMAN	1	0	MS/MS	STY:79.9663@AS(0.0362)GS(0.9350)ENEGDY(0.0287)NPGR;
ASISLTDDEVDDEEETIEEEEANEGVVDHQTELSNLAK	ASIS[79.9663]LT[79.9663]DDEVDDEEETIEEEEANEGVVDHQTELSNLAK	K	E	904	941	38	3	4S(79.9663),6T(79.9663)	sp|Q96L91-2|EP400_HUMAN	Q96L91-2	EP400_HUMAN	EP400	Isoform 2 of E1A-binding protein p400		sp|Q96L91-3|EP400_HUMAN, sp|Q96L91-4|EP400_HUMAN, sp|Q96L91-5|EP400_HUMAN, sp|Q96L91|EP400_HUMAN	1	0	MS/MS	STY:79.9663@AS(0.0300)IS(0.7654)LT(0.7384)DDEVDDEEET(0.2979)IEEEEANEGVVDHQT(0.0841)ELS(0.0841)NLAK;
ASLGSLEGEAEAEASSPK	ASLGSLEGEAEAEAS[79.9663]SPK	K	G	5748	5765	18	2,3	15S(79.9663)	sp|Q09666|AHNK_HUMAN	Q09666	AHNK_HUMAN	AHNAK	Neuroblast differentiation-associated protein AHNAK			18	4.02667328E8	MS/MS	STY:79.9663@AS(0.0208)LGS(0.0219)LEGEAEAEAS(0.9082)S(0.0491)PK;
ASLGSLEGEAEAEASSPK	ASLGS[79.9663]LEGEAEAEASSPK	K	G	5748	5765	18	2	5S(79.9663)	sp|Q09666|AHNK_HUMAN	Q09666	AHNK_HUMAN	AHNAK	Neuroblast differentiation-associated protein AHNAK			1	7.3789248E7	MS/MS	STY:79.9663@AS(0.0413)LGS(0.9135)LEGEAEAEAS(0.0240)S(0.0212)PK;
ASLGSLEGEAEAEASSPK	ASLGS[79.9663]LEGEAEAEAS[79.9663]SPK	K	G	5748	5765	18	2,3	15S(79.9663),5S(79.9663)	sp|Q09666|AHNK_HUMAN	Q09666	AHNK_HUMAN	AHNAK	Neuroblast differentiation-associated protein AHNAK			5	3.62020064E8	MS/MS	STY:79.9663@AS(0.0598)LGS(0.9400)LEGEAEAEAS(0.9400)S(0.0602)PK;
ASLVALPEQTASEEETPPPLLTK	ASLVALPEQTASEEET[79.9663]PPPLLT[79.9663]K	K	E	399	421	23	3	16T(79.9663),22T(79.9663)	sp|Q9UKV3-5|ACINU_HUMAN	Q9UKV3-5	ACINU_HUMAN	ACIN1	Isoform 4 of Apoptotic chromatin condensation inducer in the nucleus		sp|Q9UKV3|ACINU_HUMAN	1	5.0568524E7	MS/MS	STY:79.9663@AS(0.2079)LVALPEQT(0.4378)AS(0.4378)EEET(0.4649)PPPLLT(0.4516)K;
ASLVALPEQTASEEETPPPLLTK	ASLVALPEQTAS[79.9663]EEETPPPLLTK	K	E	399	421	23	3	12S(79.9663)	sp|Q9UKV3-5|ACINU_HUMAN	Q9UKV3-5	ACINU_HUMAN	ACIN1	Isoform 4 of Apoptotic chromatin condensation inducer in the nucleus		sp|Q9UKV3|ACINU_HUMAN	1	0	MS/MS	STY:79.9663@AS(0.0154)LVALPEQT(0.0176)AS(0.9010)EEET(0.0330)PPPLLT(0.0330)K;
ASLVSEEEEDEEEDK	ASLVS[79.9663]EEEEDEEEDK	K	A	112	126	15	2	5S(79.9663)	sp|Q96GN5-2|CDA7L_HUMAN	Q96GN5-2	CDA7L_HUMAN	CDCA7L	Isoform 2 of Cell division cycle-associated 7-like protein		sp|Q96GN5-4|CDA7L_HUMAN, sp|Q96GN5-5|CDA7L_HUMAN, sp|Q96GN5|CDA7L_HUMAN	1	2.1781954E7	MS/MS	STY:79.9663@AS(0.4822)LVS(0.5178)EEEEDEEEDK;
ASPAPGSGHPEGPGAHLDMNSLDR	ASPAPGS[79.9663]GHPEGPGAHLDMNSLDR	R	A	90	113	24	3	7S(79.9663)	sp|O94826|TOM70_HUMAN	O94826	TOM70_HUMAN	TOMM70	Mitochondrial import receptor subunit TOM70			3	1.38893456E8	MS/MS	STY:79.9663@AS(0.0494)PAPGS(0.9218)GHPEGPGAHLDMNS(0.0287)LDR;
ASPATQPPPLLPPSATGPDATVGGPAPTPLLPPSATASVK	ASPAT[79.9663]QPPPLLPPSATGPDATVGGPAPTPLLPPSATASVK	R	M	57	96	40	3,4	5T(79.9663)	sp|Q07666-3|KHDR1_HUMAN	Q07666-3	KHDR1_HUMAN	KHDRBS1	Isoform 3 of KH domain-containing, RNA-binding, signal transduction-associated protein 1		sp|Q07666|KHDR1_HUMAN	2	4.6078264E7	MS/MS	STY:79.9663@AS(0.0060)PAT(0.7475)QPPPLLPPS(0.0334)AT(0.0334)GPDAT(0.0540)VGGPAPT(0.0434)PLLPPS(0.0274)AT(0.0274)AS(0.0274)VK;
ASPDQNASTHTPQSSVK	ASPDQNAS[79.9663]T[79.9663]HTPQSSVK	K	T	280	296	17	2	8S(79.9663),9T(79.9663)	sp|Q14677-2|EPN4_HUMAN	Q14677-2	EPN4_HUMAN	CLINT1	Isoform 2 of Clathrin interactor 1		sp|Q14677-3|EPN4_HUMAN, sp|Q14677|EPN4_HUMAN	1	2.631766E7	MS/MS	STY:79.9663@AS(0.3248)PDQNAS(0.3456)T(0.3456)HT(0.3280)PQS(0.3280)S(0.3280)VK;
ASPEPPDSAEGALK	ASPEPPDS[79.9663]AEGALK	K	L	546	559	14	2	8S(79.9663)	sp|Q9H1B7|I2BPL_HUMAN	Q9H1B7	I2BPL_HUMAN	IRF2BPL	Probable E3 ubiquitin-protein ligase IRF2BPL			1	3.636206E7	MS/MS	STY:79.9663@AS(0.0607)PEPPDS(0.9393)AEGALK;
ASPEPPGPESSSR	ASPEPPGPESS[79.9663]SR	R	W	671	683	13	2	11S(79.9663)	sp|Q9C0C2|TB182_HUMAN	Q9C0C2	TB182_HUMAN	TNKS1BP1	182 kDa tankyrase-1-binding protein		sp|Q9C0C2-2|TB182_HUMAN	1	1.41610208E8	MS/MS	STY:79.9663@AS(0.1418)PEPPGPES(0.0176)S(0.4203)S(0.4203)R;
ASPEPPGPESSSR	ASPEPPGPES[79.9663]SSR	R	W	671	683	13	2	10S(79.9663)	sp|Q9C0C2|TB182_HUMAN	Q9C0C2	TB182_HUMAN	TNKS1BP1	182 kDa tankyrase-1-binding protein		sp|Q9C0C2-2|TB182_HUMAN	2	1.41610208E8	MS/MS	STY:79.9663@AS(0.0247)PEPPGPES(0.9302)S(0.0226)S(0.0226)R;
ASPITNDGEDEFVPSDGLDK	ASPITNDGEDEFVPS[79.9663]DGLDK	K	D	1394	1413	20	3	15S(79.9663)	sp|Q02880-2|TOP2B_HUMAN	Q02880-2	TOP2B_HUMAN	TOP2B	Isoform Beta-1 of DNA topoisomerase 2-beta		sp|Q02880|TOP2B_HUMAN	1	1.0981513E7	MS/MS	STY:79.9663@AS(0.1772)PIT(0.1772)NDGEDEFVPS(0.6456)DGLDK;
ASPKISR	ASPKIS[79.9663]R	R	K	2984	2990	7	2	6S(79.9663)	sp|O75592-2|MYCB2_HUMAN	O75592-2	MYCB2_HUMAN	MYCBP2	Isoform 2 of E3 ubiquitin-protein ligase MYCBP2		sp|O75592|MYCB2_HUMAN	1	0	MS/MS	STY:79.9663@AS(0.0588)PKIS(0.9412)R;
ASPPGGLAEPPGSAGPQAGPTVVPGSATPMETGIAETPEGR	ASPPGGLAEPPGSAGPQAGPTVVPGSAT[79.9663]PMETGIAETPEGR	R	R	68	108	41	4	28T(79.9663)	sp|O60341|KDM1A_HUMAN	O60341	KDM1A_HUMAN	KDM1A	Lysine-specific histone demethylase 1A		sp|O60341-2|KDM1A_HUMAN	1	0	MS/MS	STY:79.9663@AS(0.0636)PPGGLAEPPGS(0.1879)AGPQAGPT(0.1262)VVPGS(0.0159)AT(0.5776)PMET(0.0059)GIAET(0.0229)PEGR;
ASPPGGLAEPPGSAGPQAGPTVVPGSATPMETGIAETPEGR	ASPPGGLAEPPGSAGPQAGPTVVPGS[79.9663]ATPMETGIAETPEGR	R	R	68	108	41	4	26S(79.9663)	sp|O60341|KDM1A_HUMAN	O60341	KDM1A_HUMAN	KDM1A	Lysine-specific histone demethylase 1A		sp|O60341-2|KDM1A_HUMAN	1	4.0594336E7	MS/MS	STY:79.9663@AS(0.1488)PPGGLAEPPGS(0.0739)AGPQAGPT(0.1607)VVPGS(0.5945)AT(0.0074)PMET(0.0075)GIAET(0.0072)PEGR;
ASPPGGLAEPPGSAGPQAGPTVVPGSATPMETGIAETPEGR	ASPPGGLAEPPGSAGPQAGPT[79.9663]VVPGSATPMETGIAETPEGR	R	R	68	108	41	3,4	21T(79.9663)	sp|O60341|KDM1A_HUMAN	O60341	KDM1A_HUMAN	KDM1A	Lysine-specific histone demethylase 1A		sp|O60341-2|KDM1A_HUMAN	2	7.63534E7	MS/MS	STY:79.9663@AS(0.1352)PPGGLAEPPGS(0.0187)AGPQAGPT(0.7942)VVPGS(0.0126)AT(0.0126)PMET(0.0126)GIAET(0.0141)PEGR;
ASPPGGLAEPPGSAGPQAGPTVVPGSATPMETGIAETPEGR	ASPPGGLAEPPGS[79.9663]AGPQAGPTVVPGSATPMETGIAETPEGR	R	R	68	108	41	3	13S(79.9663)	sp|O60341|KDM1A_HUMAN	O60341	KDM1A_HUMAN	KDM1A	Lysine-specific histone demethylase 1A		sp|O60341-2|KDM1A_HUMAN	1	3.5759064E7	MS/MS	STY:79.9663@AS(0.0115)PPGGLAEPPGS(0.6292)AGPQAGPT(0.1341)VVPGS(0.0928)AT(0.0928)PMET(0.0247)GIAET(0.0149)PEGR;
ASPSCSSPTR	ASPSC[57.0215]S[79.9663]SPTR	K	D	9	18	10	2	5C(57.0215),6S(79.9663)	sp|Q8N5I9|NOPC1_HUMAN	Q8N5I9	NOPC1_HUMAN	NOPCHAP1	NOP protein chaperone 1			1	0	MS/MS	STY:79.9663@AS(0.0105)PS(0.0105)CS(0.4843)S(0.4843)PT(0.0103)R;
ASPSPQPSSQPLQIHR	ASPSPQPS[79.9663]SQPLQIHR	R	Q	143	158	16	3	8S(79.9663)	sp|Q9HC35|EMAL4_HUMAN	Q9HC35	EMAL4_HUMAN	EML4	Echinoderm microtubule-associated protein-like 4			1	0	MS/MS	STY:79.9663@AS(0.0337)PS(0.0337)PQPS(0.4663)S(0.4663)QPLQIHR;
ASPSPQPSSQPLQIHR	ASPS[79.9663]PQPSSQPLQIHR	R	Q	143	158	16	3	4S(79.9663)	sp|Q9HC35|EMAL4_HUMAN	Q9HC35	EMAL4_HUMAN	EML4	Echinoderm microtubule-associated protein-like 4			1	1.9574118E7	MS/MS	STY:79.9663@AS(0.0222)PS(0.9388)PQPS(0.0195)S(0.0195)QPLQIHR;
ASSDLSIASSEEDK	ASSDLS[79.9663]IASS[79.9663]EEDK	R	L	339	352	14	2	10S(79.9663),6S(79.9663)	sp|Q9H2G2-2|SLK_HUMAN	Q9H2G2-2	SLK_HUMAN	SLK	Isoform 2 of STE20-like serine/threonine-protein kinase		sp|Q9H2G2|SLK_HUMAN	1	1.1507552E7	MS/MS	STY:79.9663@AS(0.0404)S(0.0404)DLS(0.9196)IAS(0.0815)S(0.9179)EEDK;
ASSHSSQTQGGGSVTK	ASSHSSQTQGGGSVT[79.9663]K	R	K	402	417	16	2	15T(79.9663)	sp|P02545|LMNA_HUMAN	P02545	LMNA_HUMAN	LMNA	Prelamin-A/C		sp|P02545-2|LMNA_HUMAN, sp|P02545-3|LMNA_HUMAN, sp|P02545-4|LMNA_HUMAN, sp|P02545-5|LMNA_HUMAN, sp|P02545-6|LMNA_HUMAN	1	0	MS/MS	STY:79.9663@AS(0.0274)S(0.0274)HS(0.0274)S(0.0274)QT(0.0274)QGGGS(0.0274)VT(0.8355)K;
ASSHSSQTQGGGSVTK	ASSHSSQTQGGGS[79.9663]VTK	R	K	402	417	16	2	13S(79.9663)	sp|P02545|LMNA_HUMAN	P02545	LMNA_HUMAN	LMNA	Prelamin-A/C		sp|P02545-2|LMNA_HUMAN, sp|P02545-3|LMNA_HUMAN, sp|P02545-4|LMNA_HUMAN, sp|P02545-5|LMNA_HUMAN, sp|P02545-6|LMNA_HUMAN	1	8.8251706E8	MS/MS	STY:79.9663@AS(0.0099)S(0.0099)HS(0.0145)S(0.0150)QT(0.0102)QGGGS(0.4702)VT(0.4702)K;
ASSHSSQTQGGGSVTK	ASSHSSQT[79.9663]QGGGSVTK	R	K	402	417	16	2	8T(79.9663)	sp|P02545|LMNA_HUMAN	P02545	LMNA_HUMAN	LMNA	Prelamin-A/C		sp|P02545-2|LMNA_HUMAN, sp|P02545-3|LMNA_HUMAN, sp|P02545-4|LMNA_HUMAN, sp|P02545-5|LMNA_HUMAN, sp|P02545-6|LMNA_HUMAN	1	0	MS/MS	STY:79.9663@AS(0.0281)S(0.0150)HS(0.0150)S(0.0150)QT(0.8794)QGGGS(0.0099)VT(0.0375)K;
ASSHSSQTQGGGSVTK	ASSHSS[79.9663]QTQGGGSVTK	R	K	402	417	16	2	6S(79.9663)	sp|P02545|LMNA_HUMAN	P02545	LMNA_HUMAN	LMNA	Prelamin-A/C		sp|P02545-2|LMNA_HUMAN, sp|P02545-3|LMNA_HUMAN, sp|P02545-4|LMNA_HUMAN, sp|P02545-5|LMNA_HUMAN, sp|P02545-6|LMNA_HUMAN	2	1.05761536E9	MS/MS	STY:79.9663@AS(0.0105)S(0.0105)HS(0.0105)S(0.4759)QT(0.4759)QGGGS(0.0084)VT(0.0084)K;
ASSHSSQTQGGGSVTK	ASSHS[79.9663]SQTQGGGSVTK	R	K	402	417	16	2	5S(79.9663)	sp|P02545|LMNA_HUMAN	P02545	LMNA_HUMAN	LMNA	Prelamin-A/C		sp|P02545-2|LMNA_HUMAN, sp|P02545-3|LMNA_HUMAN, sp|P02545-4|LMNA_HUMAN, sp|P02545-5|LMNA_HUMAN, sp|P02545-6|LMNA_HUMAN	4	0	MS/MS	STY:79.9663@AS(0.0099)S(0.0183)HS(0.9294)S(0.0098)QT(0.0098)QGGGS(0.0115)VT(0.0115)K;
ASSHSSQTQGGGSVTK	ASSHS[79.9663]S[79.9663]QTQGGGSVTK	R	K	402	417	16	2	5S(79.9663),6S(79.9663)	sp|P02545|LMNA_HUMAN	P02545	LMNA_HUMAN	LMNA	Prelamin-A/C		sp|P02545-2|LMNA_HUMAN, sp|P02545-3|LMNA_HUMAN, sp|P02545-4|LMNA_HUMAN, sp|P02545-5|LMNA_HUMAN, sp|P02545-6|LMNA_HUMAN	3	8.5710976E7	MS/MS	STY:79.9663@AS(0.0413)S(0.0413)HS(0.8573)S(0.8573)QT(0.0308)QGGGS(0.0860)VT(0.0860)K;
ASSLSESSPPK	ASSLSESS[79.9663]PPK	R	A	207	217	11	2	8S(79.9663)	sp|Q9UHB6-2|LIMA1_HUMAN	Q9UHB6-2	LIMA1_HUMAN	LIMA1	Isoform Alpha of LIM domain and actin-binding protein 1		sp|Q9UHB6-3|LIMA1_HUMAN, sp|Q9UHB6-4|LIMA1_HUMAN, sp|Q9UHB6-5|LIMA1_HUMAN, sp|Q9UHB6|LIMA1_HUMAN	1	5.7444472E7	MS/MS	STY:79.9663@AS(0.0244)S(0.0244)LS(0.0244)ES(0.0244)S(0.9025)PPK;
ASSLSESSPPK	ASSLSES[79.9663]SPPK	R	A	207	217	11	2	7S(79.9663)	sp|Q9UHB6-2|LIMA1_HUMAN	Q9UHB6-2	LIMA1_HUMAN	LIMA1	Isoform Alpha of LIM domain and actin-binding protein 1		sp|Q9UHB6-3|LIMA1_HUMAN, sp|Q9UHB6-4|LIMA1_HUMAN, sp|Q9UHB6-5|LIMA1_HUMAN, sp|Q9UHB6|LIMA1_HUMAN	2	5.7444472E7	MS/MS	STY:79.9663@AS(0.0109)S(0.0112)LS(0.0115)ES(0.4832)S(0.4832)PPK;
ASSLSESSPPK	ASSLSES[79.9663]S[79.9663]PPK	R	A	207	217	11	2	7S(79.9663),8S(79.9663)	sp|Q9UHB6-2|LIMA1_HUMAN	Q9UHB6-2	LIMA1_HUMAN	LIMA1	Isoform Alpha of LIM domain and actin-binding protein 1		sp|Q9UHB6-3|LIMA1_HUMAN, sp|Q9UHB6-4|LIMA1_HUMAN, sp|Q9UHB6-5|LIMA1_HUMAN, sp|Q9UHB6|LIMA1_HUMAN	2	0	MS/MS	STY:79.9663@AS(0.0604)S(0.0604)LS(0.0458)ES(0.9167)S(0.9167)PPK;
ASSLSESSPPK	ASSLS[79.9663]ESSPPK	R	A	207	217	11	2	5S(79.9663)	sp|Q9UHB6-2|LIMA1_HUMAN	Q9UHB6-2	LIMA1_HUMAN	LIMA1	Isoform Alpha of LIM domain and actin-binding protein 1		sp|Q9UHB6-3|LIMA1_HUMAN, sp|Q9UHB6-4|LIMA1_HUMAN, sp|Q9UHB6-5|LIMA1_HUMAN, sp|Q9UHB6|LIMA1_HUMAN	2	5.7444472E7	MS/MS	STY:79.9663@AS(0.0069)S(0.0069)LS(0.3287)ES(0.3287)S(0.3287)PPK;
ASSPAQCVTPVQTVV	ASSPAQC[57.0215]VTPVQT[79.9663]VV	R	-	557	571	15	2	13T(79.9663),7C(57.0215)	sp|Q13614-2|MTMR2_HUMAN	Q13614-2	MTMR2_HUMAN	MTMR2	Isoform 2 of Myotubularin-related protein 2		sp|Q13614|MTMR2_HUMAN	1	4.7942152E7	MS/MS	STY:79.9663@AS(0.3083)S(0.3083)PAQCVT(0.0091)PVQT(0.3744)VV;
ASSSPEPPAVAELSDSGQQEPEDGGPAPGEASQGSDSEGGAQGLASASR	ASSSPEPPAVAELSDSGQQEPEDGGPAPGEASQGSDSEGGAQGLAS[79.9663]ASR	K	D	1165	1213	49	4	46S(79.9663)	sp|Q9C0C9|UBE2O_HUMAN	Q9C0C9	UBE2O_HUMAN	UBE2O	(E3-independent) E2 ubiquitin-conjugating enzyme			1	6.259838E7	MS/MS	STY:79.9663@AS(0.0265)S(0.0185)S(0.0198)PEPPAVAELS(0.0301)DS(0.0319)GQQEPEDGGPAPGEAS(0.0951)QGS(0.1922)DS(0.1922)EGGAQGLAS(0.1969)AS(0.1969)R;
ASSSPEPPAVAELSDSGQQEPEDGGPAPGEASQGSDSEGGAQGLASASR	ASSSPEPPAVAELSDSGQQEPEDGGPAPGEAS[79.9663]QGSDS[79.9663]EGGAQGLASASR	K	D	1165	1213	49	4	32S(79.9663),37S(79.9663)	sp|Q9C0C9|UBE2O_HUMAN	Q9C0C9	UBE2O_HUMAN	UBE2O	(E3-independent) E2 ubiquitin-conjugating enzyme			1	0	MS/MS	STY:79.9663@AS(0.0377)S(0.0377)S(0.0340)PEPPAVAELS(0.0819)DS(0.0819)GQQEPEDGGPAPGEAS(0.7101)QGS(0.0133)DS(0.6501)EGGAQGLAS(0.0715)AS(0.2818)R;
ASSSPEPPAVAELSDSGQQEPEDGGPAPGEASQGSDSEGGAQGLASASR	ASSSPEPPAVAELSDS[79.9663]GQQEPEDGGPAPGEASQGSDSEGGAQGLASASR	K	D	1165	1213	49	4	16S(79.9663)	sp|Q9C0C9|UBE2O_HUMAN	Q9C0C9	UBE2O_HUMAN	UBE2O	(E3-independent) E2 ubiquitin-conjugating enzyme			2	6.259838E7	MS/MS	STY:79.9663@AS(0.0168)S(0.0168)S(0.0168)PEPPAVAELS(0.0126)DS(0.6565)GQQEPEDGGPAPGEAS(0.0096)QGS(0.0870)DS(0.0850)EGGAQGLAS(0.0495)AS(0.0495)R;
ASSSPEPPAVAELSDSGQQEPEDGGPAPGEASQGSDSEGGAQGLASASR	ASSSPEPPAVAELS[79.9663]DSGQQEPEDGGPAPGEASQGS[79.9663]DSEGGAQGLASASR	K	D	1165	1213	49	4	14S(79.9663),35S(79.9663)	sp|Q9C0C9|UBE2O_HUMAN	Q9C0C9	UBE2O_HUMAN	UBE2O	(E3-independent) E2 ubiquitin-conjugating enzyme			1	3.3065124E7	MS/MS	STY:79.9663@AS(0.0262)S(0.0262)S(0.0262)PEPPAVAELS(0.8025)DS(0.0465)GQQEPEDGGPAPGEAS(0.3241)QGS(0.7087)DS(0.0149)EGGAQGLAS(0.0124)AS(0.0124)R;
ASSDLCDLVSNQSAEGLLEDCDLFGPAR	ASS[79.9663]DLC[57.0215]DLVS[79.9663]NQSAEGLLEDC[57.0215]DLFGPAR	K	D	936	963	28	3	10S(79.9663),21C(57.0215),3S(79.9663),6C(57.0215)	sp|Q14202-2|ZMYM3_HUMAN	Q14202-2	ZMYM3_HUMAN	ZMYM3	Isoform 2 of Zinc finger MYM-type protein 3		sp|Q14202|ZMYM3_HUMAN	1	0	MS/MS	STY:79.9663@AS(0.0588)S(0.8651)DLCDLVS(0.8705)NQS(0.2057)AEGLLEDCDLFGPAR;
ASSHSSQTQGGGSVTK	ASS[79.9663]HSSQTQGGGSVTK	R	K	402	417	16	2	3S(79.9663)	sp|P02545|LMNA_HUMAN	P02545	LMNA_HUMAN	LMNA	Prelamin-A/C		sp|P02545-2|LMNA_HUMAN, sp|P02545-3|LMNA_HUMAN, sp|P02545-4|LMNA_HUMAN, sp|P02545-5|LMNA_HUMAN, sp|P02545-6|LMNA_HUMAN	2	9.976E8	MS/MS	STY:79.9663@AS(0.0113)S(0.7503)HS(0.1018)S(0.1018)QT(0.0124)QGGGS(0.0112)VT(0.0112)K;
ASSHSSQTQGGGSVTK	ASS[79.9663]HS[79.9663]SQTQGGGSVTK	R	K	402	417	16	2	3S(79.9663),5S(79.9663)	sp|P02545|LMNA_HUMAN	P02545	LMNA_HUMAN	LMNA	Prelamin-A/C		sp|P02545-2|LMNA_HUMAN, sp|P02545-3|LMNA_HUMAN, sp|P02545-4|LMNA_HUMAN, sp|P02545-5|LMNA_HUMAN, sp|P02545-6|LMNA_HUMAN	2	1.36989875E9	MS/MS	STY:79.9663@AS(0.1255)S(0.6711)HS(0.5412)S(0.5412)QT(0.0403)QGGGS(0.0403)VT(0.0403)K;
ASSLEDLVLK	ASS[79.9663]LEDLVLK	R	E	254	263	10	2	3S(79.9663)	sp|Q15477|SKI2_HUMAN	Q15477	SKI2_HUMAN	SKIC2	Superkiller complex protein 2			1	8.2695712E7	MS/MS	STY:79.9663@AS(0.1242)S(0.8758)LEDLVLK;
ASSLGEIDESSELR	ASS[79.9663]LGEIDESSELR	R	V	565	578	14	2	3S(79.9663)	sp|Q16513-2|PKN2_HUMAN	Q16513-2	PKN2_HUMAN	PKN2	Isoform 2 of Serine/threonine-protein kinase N2		sp|Q16513-3|PKN2_HUMAN, sp|Q16513-4|PKN2_HUMAN, sp|Q16513-5|PKN2_HUMAN, sp|Q16513|PKN2_HUMAN	1	6.675614E7	MS/MS	STY:79.9663@AS(0.0192)S(0.9432)LGEIDES(0.0188)S(0.0188)ELR;
ASSLNFLNK	ASS[79.9663]LNFLNK	R	S	503	511	9	2	3S(79.9663)	sp|Q9H0B6-2|KLC2_HUMAN	Q9H0B6-2	KLC2_HUMAN	KLC2	Isoform 2 of Kinesin light chain 2		sp|Q9H0B6|KLC2_HUMAN	2	3.1081664E7	MS/MS	STY:79.9663@AS(0.0569)S(0.9431)LNFLNK;
ASSLSESSPPK	ASS[79.9663]LSESS[79.9663]PPK	R	A	207	217	11	2	3S(79.9663),8S(79.9663)	sp|Q9UHB6-2|LIMA1_HUMAN	Q9UHB6-2	LIMA1_HUMAN	LIMA1	Isoform Alpha of LIM domain and actin-binding protein 1		sp|Q9UHB6-3|LIMA1_HUMAN, sp|Q9UHB6-4|LIMA1_HUMAN, sp|Q9UHB6-5|LIMA1_HUMAN, sp|Q9UHB6|LIMA1_HUMAN	2	2.08564016E8	MS/MS	STY:79.9663@AS(0.0364)S(0.9446)LS(0.0370)ES(0.0374)S(0.9446)PPK;
ASSSPEPPAVAELSDSGQQEPEDGGPAPGEASQGSDSEGGAQGLASASR	ASS[79.9663]SPEPPAVAELSDS[79.9663]GQQEPEDGGPAPGEASQGSDSEGGAQGLAS[79.9663]ASR	K	D	1165	1213	49	4	16S(79.9663),3S(79.9663),46S(79.9663)	sp|Q9C0C9|UBE2O_HUMAN	Q9C0C9	UBE2O_HUMAN	UBE2O	(E3-independent) E2 ubiquitin-conjugating enzyme			1	1.92783712E8	MS/MS	STY:79.9663@AS(0.0214)S(0.5184)S(0.0176)PEPPAVAELS(0.0220)DS(0.5183)GQQEPEDGGPAPGEAS(0.3263)QGS(0.3752)DS(0.3703)EGGAQGLAS(0.4152)AS(0.4152)R;
ASSTPSSETQEEFVDDFR	ASS[79.9663]T[79.9663]PSSETQEEFVDDFR	K	V	42	59	18	2	3S(79.9663),4T(79.9663)	sp|P30622-1|CLIP1_HUMAN	P30622-1	CLIP1_HUMAN	CLIP1	Isoform 2 of CAP-Gly domain-containing linker protein 1		sp|P30622-2|CLIP1_HUMAN, sp|P30622|CLIP1_HUMAN	1	0	MS/MS	STY:79.9663@AS(0.0193)S(0.3961)T(0.3961)PS(0.3961)S(0.3961)ET(0.3961)QEEFVDDFR;
ASTASPCNNNINAATAVALQEPR	ASTAS[79.9663]PC[57.0215]NNNINAATAVALQEPR	R	K	592	614	23	3	5S(79.9663),7C(57.0215)	sp|Q71RC2-3|LARP4_HUMAN	Q71RC2-3	LARP4_HUMAN	LARP4	Isoform 3 of La-related protein 4		sp|Q71RC2-4|LARP4_HUMAN, sp|Q71RC2-5|LARP4_HUMAN, sp|Q71RC2-6|LARP4_HUMAN, sp|Q71RC2|LARP4_HUMAN	1	1.3802209E7	MS/MS	STY:79.9663@AS(0.0198)T(0.0198)AS(0.9243)PCNNNINAAT(0.0362)AVALQEPR;
ASTTSLSGSDSETEGK	ASTTSLSGS[79.9663]DS[79.9663]ETEGK	K	Q	45	60	16	2	11S(79.9663),9S(79.9663)	sp|Q8N1G2|CMTR1_HUMAN	Q8N1G2	CMTR1_HUMAN	CMTR1	Cap-specific mRNA (nucleoside-2'-O-)-methyltransferase 1			1	3.1240086E7	MS/MS	STY:79.9663@AS(0.0647)T(0.0647)T(0.0647)S(0.0647)LS(0.0647)GS(0.8220)DS(0.8220)ET(0.0328)EGK;
ASTTSLSGSDSETEGK	ASTTSLS[79.9663]GS[79.9663]DSETEGK	K	Q	45	60	16	2	7S(79.9663),9S(79.9663)	sp|Q8N1G2|CMTR1_HUMAN	Q8N1G2	CMTR1_HUMAN	CMTR1	Cap-specific mRNA (nucleoside-2'-O-)-methyltransferase 1			1	1.335822E7	MS/MS	STY:79.9663@AS(0.0159)T(0.0159)T(0.0159)S(0.0159)LS(0.4841)GS(0.4841)DS(0.4841)ET(0.4841)EGK;
ASVALTPTAPSR	ASVALTPT[79.9663]APSR	R	T	1151	1162	12	2	8T(79.9663)	sp|P28290-3|ITPI2_HUMAN	P28290-3	ITPI2_HUMAN	ITPRID2	Isoform 3 of Protein ITPRID2		sp|P28290-2|ITPI2_HUMAN, sp|P28290|ITPI2_HUMAN	1	5.10394e+06	MS/MS	STY:79.9663@AS(0.0227)VALT(0.0314)PT(0.8994)APS(0.0466)R;
ASVALTPTAPSR	ASVALT[79.9663]PTAPS[79.9663]R	R	T	1151	1162	12	2	11S(79.9663),6T(79.9663)	sp|P28290-3|ITPI2_HUMAN	P28290-3	ITPI2_HUMAN	ITPRID2	Isoform 3 of Protein ITPRID2		sp|P28290-2|ITPI2_HUMAN, sp|P28290|ITPI2_HUMAN	1	0	MS/MS	STY:79.9663@AS(0.0431)VALT(0.6313)PT(0.6313)APS(0.6943)R;
ASVALTPTAPSR	ASVALT[79.9663]PT[79.9663]APSR	R	T	1151	1162	12	2	6T(79.9663),8T(79.9663)	sp|P28290-3|ITPI2_HUMAN	P28290-3	ITPI2_HUMAN	ITPRID2	Isoform 3 of Protein ITPRID2		sp|P28290-2|ITPI2_HUMAN, sp|P28290|ITPI2_HUMAN	1	1.5123545E7	MS/MS	STY:79.9663@AS(0.0412)VALT(0.6529)PT(0.6529)APS(0.6529)R;
ASVLDTSMSAGSGSPSK	ASVLDTSMSAGSGS[79.9663]PSK	R	T	510	526	17	2	14S(79.9663)	sp|Q9UPQ0-10|LIMC1_HUMAN	Q9UPQ0-10	LIMC1_HUMAN	LIMCH1	Isoform 10 of LIM and calponin homology domains-containing protein 1		sp|Q9UPQ0-2|LIMC1_HUMAN, sp|Q9UPQ0-3|LIMC1_HUMAN, sp|Q9UPQ0-4|LIMC1_HUMAN, sp|Q9UPQ0-5|LIMC1_HUMAN, sp|Q9UPQ0-6|LIMC1_HUMAN, sp|Q9UPQ0-8|LIMC1_HUMAN, sp|Q9UPQ0-9|LIMC1_HUMAN, sp|Q9UPQ0|LIMC1_HUMAN	1	0	MS/MS	STY:79.9663@AS(0.0402)VLDT(0.0402)S(0.0402)MS(0.1584)AGS(0.0062)GS(0.3574)PS(0.3574)K;
ASVLDTSMSAGSGSPSK	ASVLDTSM[15.9949]SAGS[79.9663]GSPSK	R	T	510	526	17	2	12S(79.9663),8M(15.9949)	sp|Q9UPQ0-10|LIMC1_HUMAN	Q9UPQ0-10	LIMC1_HUMAN	LIMCH1	Isoform 10 of LIM and calponin homology domains-containing protein 1		sp|Q9UPQ0-2|LIMC1_HUMAN, sp|Q9UPQ0-3|LIMC1_HUMAN, sp|Q9UPQ0-4|LIMC1_HUMAN, sp|Q9UPQ0-5|LIMC1_HUMAN, sp|Q9UPQ0-6|LIMC1_HUMAN, sp|Q9UPQ0-8|LIMC1_HUMAN, sp|Q9UPQ0-9|LIMC1_HUMAN, sp|Q9UPQ0|LIMC1_HUMAN	1	1.7611096E7	MS/MS	M:15.9949@ASVLDTSM(1.0000)SAGSGSPSK;STY:79.9663@AS(0.0078)VLDT(0.0081)S(0.0109)MS(0.0109)AGS(0.4734)GS(0.4734)PS(0.0157)K;
ASVSGPNSPSETR	ASVSGPNSPSET[79.9663]R	K	R	89	101	13	2	12T(79.9663)	sp|O15344-2|TRI18_HUMAN	O15344-2	TRI18_HUMAN	MID1	Isoform 2 of E3 ubiquitin-protein ligase Midline-1		sp|O15344|TRI18_HUMAN	1	2.8353814E7	MS/MS	STY:79.9663@AS(0.0798)VS(0.0798)GPNS(0.2568)PS(0.2568)ET(0.3269)R;
ASVSGPNSPSETR	ASVSGPNS[79.9663]PSETR	K	R	89	101	13	2	8S(79.9663)	sp|O15344-2|TRI18_HUMAN	O15344-2	TRI18_HUMAN	MID1	Isoform 2 of E3 ubiquitin-protein ligase Midline-1		sp|O15344|TRI18_HUMAN	1	2.7730446E7	MS/MS	STY:79.9663@AS(0.0382)VS(0.0382)GPNS(0.8968)PS(0.0134)ET(0.0134)R;
ASVSPMDEPVPDSESPIEK	ASVSPMDEPVPDS[79.9663]ESPIEK	R	V	1375	1393	19	2	13S(79.9663)	sp|P46821|MAP1B_HUMAN	P46821	MAP1B_HUMAN	MAP1B	Microtubule-associated protein 1B			3	7.2683376E7	MS/MS	STY:79.9663@AS(0.0479)VS(0.0479)PMDEPVPDS(0.8794)ES(0.0248)PIEK;
ASVSGPNSPSETR	ASVS[79.9663]GPNS[79.9663]PSETR	K	R	89	101	13	2	4S(79.9663),8S(79.9663)	sp|O15344-2|TRI18_HUMAN	O15344-2	TRI18_HUMAN	MID1	Isoform 2 of E3 ubiquitin-protein ligase Midline-1		sp|O15344|TRI18_HUMAN	1	1.9084654E7	MS/MS	STY:79.9663@AS(0.0384)VS(0.9448)GPNS(0.9449)PS(0.0360)ET(0.0359)R;
ASVSPMDEPVPDSESPIEK	ASVS[79.9663]PMDEPVPDSESPIEK	R	V	1375	1393	19	2	4S(79.9663)	sp|P46821|MAP1B_HUMAN	P46821	MAP1B_HUMAN	MAP1B	Microtubule-associated protein 1B			1	0	MS/MS	STY:79.9663@AS(0.0186)VS(0.8069)PMDEPVPDS(0.0444)ES(0.1301)PIEK;
ASVVDPSTESSPAPQEGSEQPASPASPLSSR	ASVVDPSTESSPAPQEGSEQPASPASPLSS[79.9663]R	K	Q	410	440	31	3	30S(79.9663)	sp|Q66K14-2|TBC9B_HUMAN	Q66K14-2	TBC9B_HUMAN	TBC1D9B	Isoform 2 of TBC1 domain family member 9B		sp|Q66K14|TBC9B_HUMAN	1	8.4311232E7	MS/MS	STY:79.9663@AS(0.0181)VVDPS(0.0166)T(0.0166)ES(0.0176)S(0.0178)PAPQEGS(0.0110)EQPAS(0.0086)PAS(0.0102)PLS(0.0102)S(0.8735)R;
ASVVDPSTESSPAPQEGSEQPASPASPLSSR	ASVVDPSTESSPAPQEGSEQPASPAS[79.9663]PLSSR	K	Q	410	440	31	3	26S(79.9663)	sp|Q66K14-2|TBC9B_HUMAN	Q66K14-2	TBC9B_HUMAN	TBC1D9B	Isoform 2 of TBC1 domain family member 9B		sp|Q66K14|TBC9B_HUMAN	1	8.4311232E7	MS/MS	STY:79.9663@AS(0.0184)VVDPS(0.0185)T(0.0187)ES(0.0220)S(0.0067)PAPQEGS(0.0069)EQPAS(0.0060)PAS(0.8817)PLS(0.0066)S(0.0144)R;
ASVVDPSTESSPAPQEGSEQPASPASPLSSR	ASVVDPSTESSPAPQEGSEQPAS[79.9663]PASPLSSR	K	Q	410	440	31	3	23S(79.9663)	sp|Q66K14-2|TBC9B_HUMAN	Q66K14-2	TBC9B_HUMAN	TBC1D9B	Isoform 2 of TBC1 domain family member 9B		sp|Q66K14|TBC9B_HUMAN	1	2.7078044E7	MS/MS	STY:79.9663@AS(0.0266)VVDPS(0.0290)T(0.0146)ES(0.0146)S(0.0146)PAPQEGS(0.0029)EQPAS(0.2244)PAS(0.2244)PLS(0.2244)S(0.2244)R;
ASVVDPSTESSPAPQEGSEQPASPASPLSSR	ASVVDPSTESSPAPQEGSEQPAS[79.9663]PAS[79.9663]PLSSR	K	Q	410	440	31	3	23S(79.9663),26S(79.9663)	sp|Q66K14-2|TBC9B_HUMAN	Q66K14-2	TBC9B_HUMAN	TBC1D9B	Isoform 2 of TBC1 domain family member 9B		sp|Q66K14|TBC9B_HUMAN	4	1.20609144E8	MS/MS	STY:79.9663@AS(0.0764)VVDPS(0.0702)T(0.0702)ES(0.0805)S(0.0805)PAPQEGS(0.0805)EQPAS(0.7591)PAS(0.7591)PLS(0.0116)S(0.0119)R;
ASVVDPSTESSPAPQEGSEQPASPASPLSSR	ASVVDPSTESSPAPQEGS[79.9663]EQPASPAS[79.9663]PLSSR	K	Q	410	440	31	3	18S(79.9663),26S(79.9663)	sp|Q66K14-2|TBC9B_HUMAN	Q66K14-2	TBC9B_HUMAN	TBC1D9B	Isoform 2 of TBC1 domain family member 9B		sp|Q66K14|TBC9B_HUMAN	1	0	MS/MS	STY:79.9663@AS(0.1223)VVDPS(0.1307)T(0.1840)ES(0.1840)S(0.1840)PAPQEGS(0.3707)EQPAS(0.3130)PAS(0.4915)PLS(0.0099)S(0.0099)R;
ASVVDPSTESSPAPQEGSEQPASPASPLSSR	ASVVDPSTES[79.9663]SPAPQEGS[79.9663]EQPASPASPLSSR	K	Q	410	440	31	3	10S(79.9663),18S(79.9663)	sp|Q66K14-2|TBC9B_HUMAN	Q66K14-2	TBC9B_HUMAN	TBC1D9B	Isoform 2 of TBC1 domain family member 9B		sp|Q66K14|TBC9B_HUMAN	1	7.2541184E7	MS/MS	STY:79.9663@AS(0.0082)VVDPS(0.0082)T(0.0082)ES(0.3239)S(0.3239)PAPQEGS(0.3411)EQPAS(0.3052)PAS(0.3052)PLS(0.1880)S(0.1880)R;
ASWASENGETDAEGTQMTPAK	ASWAS[79.9663]ENGET[79.9663]DAEGTQMTPAK	R	R	1864	1884	21	2	10T(79.9663),5S(79.9663)	sp|Q12789-3|TF3C1_HUMAN	Q12789-3	TF3C1_HUMAN	GTF3C1	Isoform 2 of General transcription factor 3C polypeptide 1		sp|Q12789|TF3C1_HUMAN	2	2.2155276E7	MS/MS	STY:79.9663@AS(0.0441)WAS(0.9010)ENGET(0.9013)DAEGT(0.0822)QMT(0.0714)PAK;
ASYHFSPEELDENTSPLLGDAR	ASYHFSPEELDENT[79.9663]SPLLGDAR	K	F	262	283	22	3	14T(79.9663)	sp|O75410-2|TACC1_HUMAN	O75410-2	TACC1_HUMAN	TACC1	Isoform 2 of Transforming acidic coiled-coil-containing protein 1		sp|O75410-3|TACC1_HUMAN, sp|O75410-7|TACC1_HUMAN, sp|O75410-9|TACC1_HUMAN, sp|O75410|TACC1_HUMAN	1	0	MS/MS	STY:79.9663@AS(0.0575)Y(0.0575)HFS(0.0575)PEELDENT(0.4137)S(0.4137)PLLGDAR;
ASALLFSSDEEDQWNIPASQTHLASDSR	AS[79.9663]ALLFS[79.9663]SDEEDQWNIPASQTHLASDSR	K	S	613	640	28	3	2S(79.9663),7S(79.9663)	sp|Q641Q2-2|WAC2A_HUMAN	Q641Q2-2	WAC2A_HUMAN	WASHC2A	Isoform 2 of WASH complex subunit 2A	WASHC2C	sp|Q641Q2|WAC2A_HUMAN, sp|Q9Y4E1-4|WAC2C_HUMAN, sp|Q9Y4E1-5|WAC2C_HUMAN, sp|Q9Y4E1-6|WAC2C_HUMAN, sp|Q9Y4E1|WAC2C_HUMAN	1	3.5144072E7	MS/MS	STY:79.9663@AS(0.5875)ALLFS(0.5132)S(0.5132)DEEDQWNIPAS(0.0800)QT(0.1165)HLAS(0.0909)DS(0.0988)R;
ASAPSPNAQVACDHCLK	AS[79.9663]APSPNAQVAC[57.0215]DHC[57.0215]LK	R	E	96	112	17	3	12C(57.0215),15C(57.0215),2S(79.9663)	sp|Q14258|TRI25_HUMAN	Q14258	TRI25_HUMAN	TRIM25	E3 ubiquitin/ISG15 ligase TRIM25			2	2.7557454E7	MS/MS	STY:79.9663@AS(0.5000)APS(0.5000)PNAQVACDHCLK;
ASASGSGAQVGGPISSGSSASSVTVTR	AS[79.9663]ASGSGAQVGGPISSGSSASSVTVTR	K	S	598	624	27	3	2S(79.9663)	sp|P02545|LMNA_HUMAN	P02545	LMNA_HUMAN	LMNA	Prelamin-A/C		sp|P02545-3|LMNA_HUMAN, sp|P02545-4|LMNA_HUMAN, sp|P02545-5|LMNA_HUMAN	1	0	MS/MS	STY:79.9663@AS(0.4490)AS(0.4490)GS(0.0096)GAQVGGPIS(0.0062)S(0.0062)GS(0.0061)S(0.0126)AS(0.0126)S(0.0120)VT(0.0189)VT(0.0178)R;
ASASGSGAQVGGPISSGSSASSVTVTR	AS[79.9663]ASGSGAQVGGPIS[79.9663]SGSSASSVTVTR	K	S	598	624	27	3	15S(79.9663),2S(79.9663)	sp|P02545|LMNA_HUMAN	P02545	LMNA_HUMAN	LMNA	Prelamin-A/C		sp|P02545-3|LMNA_HUMAN, sp|P02545-4|LMNA_HUMAN, sp|P02545-5|LMNA_HUMAN	1	0	MS/MS	STY:79.9663@AS(0.3448)AS(0.3448)GS(0.3448)GAQVGGPIS(0.4830)S(0.0077)GS(0.0791)S(0.0791)AS(0.0791)S(0.0791)VT(0.0791)VT(0.0791)R;
ASASPGENDSGTGGEEPQR	AS[79.9663]ASPGENDSGTGGEEPQR	K	D	1708	1726	19	2	2S(79.9663)	sp|Q15911-2|ZFHX3_HUMAN	Q15911-2	ZFHX3_HUMAN	ZFHX3	Isoform B of Zinc finger homeobox protein 3		sp|Q15911|ZFHX3_HUMAN	2	1.4283609E7	MS/MS	STY:79.9663@AS(0.4872)AS(0.4872)PGENDS(0.0128)GT(0.0128)GGEEPQR;
ASAVSELSPR	AS[79.9663]AVSELSPR	R	E	236	245	10	2	2S(79.9663)	sp|Q9Y2W1|TR150_HUMAN	Q9Y2W1	TR150_HUMAN	THRAP3	Thyroid hormone receptor-associated protein 3			2	3.91933984E8	MS/MS	STY:79.9663@AS(0.5608)AVS(0.0183)ELS(0.4209)PR;
ASAVSELSPRERSPALK	AS[79.9663]AVSELSPRERS[79.9663]PALK	R	S	236	252	17	3	13S(79.9663),2S(79.9663)	sp|Q9Y2W1|TR150_HUMAN	Q9Y2W1	TR150_HUMAN	THRAP3	Thyroid hormone receptor-associated protein 3			1	4.1251956E7	MS/MS	STY:79.9663@AS(0.4870)AVS(0.4870)ELS(0.4870)PRERS(0.5391)PALK;
ASDLEDEESAAR	AS[79.9663]DLEDEESAAR	R	G	45	56	12	2	2S(79.9663)	sp|Q86VM9|ZCH18_HUMAN	Q86VM9	ZCH18_HUMAN	ZC3H18	Zinc finger CCCH domain-containing protein 18			4	1.93035952E8	MS/MS	STY:79.9663@AS(0.9470)DLEDEES(0.0530)AAR;
ASDPGLPAEEPK	AS[79.9663]DPGLPAEEPK	R	E	1858	1869	12	2	2S(79.9663)	sp|P27708|PYR1_HUMAN	P27708	PYR1_HUMAN	CAD	CAD protein			9	3.764744E8	MS/MS	STY:79.9663@AS(1.0000)DPGLPAEEPK;
ASDPQSPPQVSR	AS[79.9663]DPQSPPQVSR	R	H	242	253	12	2	2S(79.9663)	sp|Q7L7X3-2|TAOK1_HUMAN	Q7L7X3-2	TAOK1_HUMAN	TAOK1	Isoform 2 of Serine/threonine-protein kinase TAO1		sp|Q7L7X3-3|TAOK1_HUMAN, sp|Q7L7X3|TAOK1_HUMAN	4	7.1892312E7	MS/MS	STY:79.9663@AS(0.5031)DPQS(0.4695)PPQVS(0.0275)R;
ASEDTTSGSPPK	AS[79.9663]EDTTSGSPPK	R	K	456	467	12	2	2S(79.9663)	sp|Q9BZZ5-1|API5_HUMAN	Q9BZZ5-1	API5_HUMAN	API5	Isoform 1 of Apoptosis inhibitor 5		sp|Q9BZZ5-2|API5_HUMAN, sp|Q9BZZ5-5|API5_HUMAN, sp|Q9BZZ5-6|API5_HUMAN, sp|Q9BZZ5|API5_HUMAN	2	2.75128192E8	MS/MS	STY:79.9663@AS(0.2479)EDT(0.2479)T(0.2479)S(0.2479)GS(0.0084)PPK;
ASEIDQVVPAAQSSPINCEK	AS[79.9663]EIDQVVPAAQSSPINC[57.0215]EK	R	R	54	73	20	3	18C(57.0215),2S(79.9663)	sp|O94782|UBP1_HUMAN	O94782	UBP1_HUMAN	USP1	Ubiquitin carboxyl-terminal hydrolase 1			2	1.8994328E7	MS/MS	STY:79.9663@AS(0.9365)EIDQVVPAAQS(0.0326)S(0.0309)PINCEK;
ASGDPGASGMSPR	AS[79.9663]GDPGASGMSPR	K	A	99	111	13	2	2S(79.9663)	sp|Q8NDT2|RB15B_HUMAN	Q8NDT2	RB15B_HUMAN	RBM15B	Putative RNA-binding protein 15B			1	3.8543856E7	MS/MS	STY:79.9663@AS(0.9388)GDPGAS(0.0306)GMS(0.0306)PR;
ASGPPVSELITK	AS[79.9663]GPPVSELITK	K	A	35	46	12	2	2S(79.9663)	sp|P10412|H14_HUMAN	P10412	H14_HUMAN	H1-4	Histone H1.4	H1-2, H1-3	sp|P16402|H13_HUMAN, sp|P16403|H12_HUMAN	1	0	MS/MS	STY:79.9663@AS(0.9446)GPPVS(0.0278)ELIT(0.0276)K;
ASGQAFELILSPR	AS[79.9663]GQAFELILSPR	R	S	15	27	13	2	2S(79.9663)	sp|P16949-2|STMN1_HUMAN	P16949-2	STMN1_HUMAN	STMN1	Isoform 2 of Stathmin		sp|P16949|STMN1_HUMAN	2	3.060206E7	MS/MS	STY:79.9663@AS(0.9385)GQAFELILS(0.0615)PR;
ASGQAFELILSPR	AS[79.9663]GQAFELILS[79.9663]PR	R	S	15	27	13	2	11S(79.9663),2S(79.9663)	sp|P16949-2|STMN1_HUMAN	P16949-2	STMN1_HUMAN	STMN1	Isoform 2 of Stathmin		sp|P16949|STMN1_HUMAN	2	3.4831632E7	MS/MS	STY:79.9663@AS(1.0000)GQAFELILS(1.0000)PR;
ASGSENEGDYNPGR	AS[79.9663]GSENEGDYNPGR	K	K	1544	1557	14	2	2S(79.9663)	sp|Q02880-2|TOP2B_HUMAN	Q02880-2	TOP2B_HUMAN	TOP2B	Isoform Beta-1 of DNA topoisomerase 2-beta		sp|Q02880|TOP2B_HUMAN	1	0	MS/MS	STY:79.9663@AS(0.4913)GS(0.4913)ENEGDY(0.0174)NPGR;
ASGSENEGDYNPGR	AS[79.9663]GS[79.9663]ENEGDYNPGR	K	K	1544	1557	14	2	2S(79.9663),4S(79.9663)	sp|Q02880-2|TOP2B_HUMAN	Q02880-2	TOP2B_HUMAN	TOP2B	Isoform Beta-1 of DNA topoisomerase 2-beta		sp|Q02880|TOP2B_HUMAN	2	3.0968704E7	MS/MS	STY:79.9663@AS(0.9313)GS(0.9313)ENEGDY(0.1374)NPGR;
ASGVAVSDGVIK	AS[79.9663]GVAVSDGVIK	M	V	2	13	12	2	2S(79.9663)	sp|P23528|COF1_HUMAN	P23528	COF1_HUMAN	CFL1	Cofilin-1			1	9895441	MS/MS	STY:79.9663@AS(0.9160)GVAVS(0.0840)DGVIK;
ASLEAAIADAEQR	AS[79.9663]LEAAIADAEQR	R	G	357	369	13	2	2S(79.9663)	sp|P05787-2|K2C8_HUMAN	P05787-2	K2C8_HUMAN	KRT8	Isoform 2 of Keratin, type II cytoskeletal 8		sp|P05787|K2C8_HUMAN	1	1.5730825E7	MS/MS	STY:79.9663@AS(1.0000)LEAAIADAEQR;
ASLEDAPVDDLTR	AS[79.9663]LEDAPVDDLTR	R	K	283	295	13	2	2S(79.9663)	sp|Q7Z2W4-2|ZCCHV_HUMAN	Q7Z2W4-2	ZCCHV_HUMAN	ZC3HAV1	Isoform 2 of Zinc finger CCCH-type antiviral protein 1		sp|Q7Z2W4-3|ZCCHV_HUMAN, sp|Q7Z2W4|ZCCHV_HUMAN	3	2.9980508E7	MS/MS	STY:79.9663@AS(0.9410)LEDAPVDDLT(0.0590)R;
ASLEEPPDGPSAGQATGPGEGR	AS[79.9663]LEEPPDGPSAGQATGPGEGR	R	R	23	44	22	2	2S(79.9663)	sp|Q9BVG9|PTSS2_HUMAN	Q9BVG9	PTSS2_HUMAN	PTDSS2	Phosphatidylserine synthase 2			2	1.3065264E7	MS/MS	STY:79.9663@AS(0.6139)LEEPPDGPS(0.1257)AGQAT(0.2604)GPGEGR;
ASLGSLEGEAEAEASSPK	AS[79.9663]LGSLEGEAEAEASSPK	K	G	5748	5765	18	2,3	2S(79.9663)	sp|Q09666|AHNK_HUMAN	Q09666	AHNK_HUMAN	AHNAK	Neuroblast differentiation-associated protein AHNAK			4	3.2250236E7	MS/MS	STY:79.9663@AS(0.9418)LGS(0.0202)LEGEAEAEAS(0.0190)S(0.0190)PK;
ASLGSLEGEAEAEASSPK	AS[79.9663]LGSLEGEAEAEAS[79.9663]SPK	K	G	5748	5765	18	2,3	15S(79.9663),2S(79.9663)	sp|Q09666|AHNK_HUMAN	Q09666	AHNK_HUMAN	AHNAK	Neuroblast differentiation-associated protein AHNAK			3	3.90984608E8	MS/MS	STY:79.9663@AS(0.9190)LGS(0.0657)LEGEAEAEAS(0.9180)S(0.0972)PK;
ASLGSLEGEAEAEASSPK	AS[79.9663]LGS[79.9663]LEGEAEAEASSPK	K	G	5748	5765	18	2	2S(79.9663),5S(79.9663)	sp|Q09666|AHNK_HUMAN	Q09666	AHNK_HUMAN	AHNAK	Neuroblast differentiation-associated protein AHNAK			8	3.604792E8	MS/MS	STY:79.9663@AS(0.9191)LGS(0.9194)LEGEAEAEAS(0.0807)S(0.0807)PK;
ASLGSLEGEAEAEASSPK	AS[79.9663]LGS[79.9663]LEGEAEAEAS[79.9663]SPK	K	G	5748	5765	18	2	15S(79.9663),2S(79.9663),5S(79.9663)	sp|Q09666|AHNK_HUMAN	Q09666	AHNK_HUMAN	AHNAK	Neuroblast differentiation-associated protein AHNAK			3	7.8747128E7	MS/MS	STY:79.9663@AS(0.7632)LGS(0.7633)LEGEAEAEAS(0.7367)S(0.7367)PK;
ASLVSEEEEDEEEDK	AS[79.9663]LVSEEEEDEEEDK	K	A	112	126	15	2	2S(79.9663)	sp|Q96GN5-2|CDA7L_HUMAN	Q96GN5-2	CDA7L_HUMAN	CDCA7L	Isoform 2 of Cell division cycle-associated 7-like protein		sp|Q96GN5-4|CDA7L_HUMAN, sp|Q96GN5-5|CDA7L_HUMAN, sp|Q96GN5|CDA7L_HUMAN	1	2.1158076E7	MS/MS	STY:79.9663@AS(0.5000)LVS(0.5000)EEEEDEEEDK;
ASLVSEEEEDEEEDK	AS[79.9663]LVS[79.9663]EEEEDEEEDK	K	A	112	126	15	2	2S(79.9663),5S(79.9663)	sp|Q96GN5-2|CDA7L_HUMAN	Q96GN5-2	CDA7L_HUMAN	CDCA7L	Isoform 2 of Cell division cycle-associated 7-like protein		sp|Q96GN5-4|CDA7L_HUMAN, sp|Q96GN5-5|CDA7L_HUMAN, sp|Q96GN5|CDA7L_HUMAN	4	1.36207216E8	MS/MS	STY:79.9663@AS(1.0000)LVS(1.0000)EEEEDEEEDK;
ASNEDVTK	AS[79.9663]NEDVTK	K	A	128	135	8	2	2S(79.9663)	sp|O75475|PSIP1_HUMAN	O75475	PSIP1_HUMAN	PSIP1	PC4 and SFRS1-interacting protein		sp|O75475-2|PSIP1_HUMAN, sp|O75475-3|PSIP1_HUMAN	1	0	MS/MS	STY:79.9663@AS(0.7867)NEDVT(0.2133)K;
ASPAPGSGHPEGPGAHLDMNSLDR	AS[79.9663]PAPGSGHPEGPGAHLDMNSLDR	R	A	90	113	24	3,4	2S(79.9663)	sp|O94826|TOM70_HUMAN	O94826	TOM70_HUMAN	TOMM70	Mitochondrial import receptor subunit TOM70			10	2.28062416E8	MS/MS	STY:79.9663@AS(0.9447)PAPGS(0.0274)GHPEGPGAHLDMNS(0.0279)LDR;
ASPAPGSGHPEGPGAHLDMNSLDR	AS[79.9663]PAPGSGHPEGPGAHLDM[15.9949]NSLDR	R	A	90	113	24	3	19M(15.9949),2S(79.9663)	sp|O94826|TOM70_HUMAN	O94826	TOM70_HUMAN	TOMM70	Mitochondrial import receptor subunit TOM70			2	5.6888384E7	MS/MS	M:15.9949@ASPAPGSGHPEGPGAHLDM(1.0000)NSLDR;STY:79.9663@AS(0.4890)PAPGS(0.4890)GHPEGPGAHLDMNS(0.0220)LDR;
ASPATQPPPLLPPSATGPDATVGGPAPTPLLPPSATASVK	AS[79.9663]PATQPPPLLPPSATGPDATVGGPAPTPLLPPSATASVK	R	M	57	96	40	3,4	2S(79.9663)	sp|Q07666-3|KHDR1_HUMAN	Q07666-3	KHDR1_HUMAN	KHDRBS1	Isoform 3 of KH domain-containing, RNA-binding, signal transduction-associated protein 1		sp|Q07666|KHDR1_HUMAN	2	2.44802688E8	MS/MS	STY:79.9663@AS(0.3758)PAT(0.3758)QPPPLLPPS(0.0122)AT(0.0122)GPDAT(0.0122)VGGPAPT(0.1096)PLLPPS(0.0336)AT(0.0336)AS(0.0350)VK;
ASPEPPGPESSSR	AS[79.9663]PEPPGPESSSR	R	W	671	683	13	2	2S(79.9663)	sp|Q9C0C2|TB182_HUMAN	Q9C0C2	TB182_HUMAN	TNKS1BP1	182 kDa tankyrase-1-binding protein		sp|Q9C0C2-2|TB182_HUMAN	3	1.41610208E8	MS/MS	STY:79.9663@AS(0.9443)PEPPGPES(0.0186)S(0.0186)S(0.0186)R;
ASPFEEDQNR	AS[79.9663]PFEEDQNR	K	D	135	144	10	2	2S(79.9663)	sp|Q8TB72-2|PUM2_HUMAN	Q8TB72-2	PUM2_HUMAN	PUM2	Isoform 2 of Pumilio homolog 2		sp|Q8TB72-3|PUM2_HUMAN, sp|Q8TB72-4|PUM2_HUMAN, sp|Q8TB72|PUM2_HUMAN	3	7.3067392E7	MS/MS	STY:79.9663@AS(1.0000)PFEEDQNR;
ASPGGVSTSSSDGK	AS[79.9663]PGGVSTSSSDGK	R	A	33	46	14	2	2S(79.9663)	sp|P54259|ATN1_HUMAN	P54259	ATN1_HUMAN	ATN1	Atrophin-1			1	0	MS/MS	STY:79.9663@AS(0.9416)PGGVS(0.0111)T(0.0111)S(0.0120)S(0.0120)S(0.0120)DGK;
ASPITNDGEDEFVPSDGLDK	AS[79.9663]PITNDGEDEFVPSDGLDK	K	D	1394	1413	20	3	2S(79.9663)	sp|Q02880-2|TOP2B_HUMAN	Q02880-2	TOP2B_HUMAN	TOP2B	Isoform Beta-1 of DNA topoisomerase 2-beta		sp|Q02880|TOP2B_HUMAN	2	1.0981513E7	MS/MS	STY:79.9663@AS(0.4149)PIT(0.4149)NDGEDEFVPS(0.1701)DGLDK;
ASPITNDGEDEFVPSDGLDK	AS[79.9663]PITNDGEDEFVPS[79.9663]DGLDK	K	D	1394	1413	20	3	15S(79.9663),2S(79.9663)	sp|Q02880-2|TOP2B_HUMAN	Q02880-2	TOP2B_HUMAN	TOP2B	Isoform Beta-1 of DNA topoisomerase 2-beta		sp|Q02880|TOP2B_HUMAN	2	6.652384E7	MS/MS	STY:79.9663@AS(0.9458)PIT(0.1084)NDGEDEFVPS(0.9458)DGLDK;
ASPITNDGEDEFVPSDGLDK	AS[79.9663]PIT[79.9663]NDGEDEFVPSDGLDK	K	D	1394	1413	20	3	2S(79.9663),5T(79.9663)	sp|Q02880-2|TOP2B_HUMAN	Q02880-2	TOP2B_HUMAN	TOP2B	Isoform Beta-1 of DNA topoisomerase 2-beta		sp|Q02880|TOP2B_HUMAN	1	6.652384E7	MS/MS	STY:79.9663@AS(0.7090)PIT(0.6995)NDGEDEFVPS(0.5915)DGLDK;
ASPLPPPPPPPGAEPACPGSSAAAPEYK	AS[79.9663]PLPPPPPPPGAEPAC[57.0215]PGSSAAAPEYK	R	T	112	139	28	3	17C(57.0215),2S(79.9663)	sp|Q8NDT2|RB15B_HUMAN	Q8NDT2	RB15B_HUMAN	RBM15B	Putative RNA-binding protein 15B			1	1.4513416E7	MS/MS	STY:79.9663@AS(0.3411)PLPPPPPPPGAEPACPGS(0.2829)S(0.2340)AAAPEY(0.1419)K;
ASPPASPPIAFPPAFEAAQVEAKPDELK	AS[79.9663]PPAS[79.9663]PPIAFPPAFEAAQVEAKPDELK	K	V	4356	4383	28	3	2S(79.9663),6S(79.9663)	sp|Q8NEZ4-2|KMT2C_HUMAN	Q8NEZ4-2	KMT2C_HUMAN	KMT2C	Isoform 2 of Histone-lysine N-methyltransferase 2C		sp|Q8NEZ4-3|KMT2C_HUMAN, sp|Q8NEZ4|KMT2C_HUMAN	1	3.2362644E7	MS/MS	STY:79.9663@AS(1.0000)PPAS(1.0000)PPIAFPPAFEAAQVEAKPDELK;
ASPPGDLQNPK	AS[79.9663]PPGDLQNPK	K	R	314	324	11	2	2S(79.9663)	sp|O00273|DFFA_HUMAN	O00273	DFFA_HUMAN	DFFA	DNA fragmentation factor subunit alpha			14	3.3444672E8	MS/MS	STY:79.9663@AS(1.0000)PPGDLQNPK;
ASPPGGLAEPPGSAGPQAGPTVVPGSATPMETGIAETPEGR	AS[79.9663]PPGGLAEPPGSAGPQAGPTVVPGSATPMETGIAETPEGR	R	R	68	108	41	3	2S(79.9663)	sp|O60341|KDM1A_HUMAN	O60341	KDM1A_HUMAN	KDM1A	Lysine-specific histone demethylase 1A		sp|O60341-2|KDM1A_HUMAN	1	0	MS/MS	STY:79.9663@AS(0.7703)PPGGLAEPPGS(0.0223)AGPQAGPT(0.0968)VVPGS(0.0352)AT(0.0216)PMET(0.0269)GIAET(0.0269)PEGR;
ASPPPQGPLPGPPGALHR	AS[79.9663]PPPQGPLPGPPGALHR	R	W	39	56	18	3	2S(79.9663)	sp|Q96G74-2|OTUD5_HUMAN	Q96G74-2	OTUD5_HUMAN	OTUD5	Isoform 2 of OTU domain-containing protein 5		sp|Q96G74-3|OTUD5_HUMAN, sp|Q96G74-5|OTUD5_HUMAN, sp|Q96G74|OTUD5_HUMAN	9	6.4738896E7	MS/MS	STY:79.9663@AS(1.0000)PPPQGPLPGPPGALHR;
ASPQENGPAVHK	AS[79.9663]PQENGPAVHK	K	G	562	573	12	2	2S(79.9663)	sp|Q5JSZ5|PRC2B_HUMAN	Q5JSZ5	PRC2B_HUMAN	PRRC2B	Protein PRRC2B		sp|Q5JSZ5-5|PRC2B_HUMAN	1	0	MS/MS	STY:79.9663@AS(1.0000)PQENGPAVHK;
ASPSENNAGGGSPSSGSGGNPTNTSGTTR	AS[79.9663]PSENNAGGGSPSSGSGGNPTNTSGTTR	K	R	596	624	29	3	2S(79.9663)	sp|Q9NRH2|SNRK_HUMAN	Q9NRH2	SNRK_HUMAN	SNRK	SNF-related serine/threonine-protein kinase			2	1.0437497E7	MS/MS	STY:79.9663@AS(0.1966)PS(0.1966)ENNAGGGS(0.1966)PS(0.1966)S(0.1966)GS(0.0042)GGNPT(0.0025)NT(0.0025)S(0.0025)GT(0.0025)T(0.0025)R;
ASPSPQPSSQPLQIHR	AS[79.9663]PSPQPSSQPLQIHR	R	Q	143	158	16	2,3	2S(79.9663)	sp|Q9HC35|EMAL4_HUMAN	Q9HC35	EMAL4_HUMAN	EML4	Echinoderm microtubule-associated protein-like 4			3	3.7852584E7	MS/MS	STY:79.9663@AS(0.9327)PS(0.0294)PQPS(0.0189)S(0.0189)QPLQIHR;
ASPSPQPSSQPLQIHR	AS[79.9663]PSPQPS[79.9663]SQPLQIHR	R	Q	143	158	16	2	2S(79.9663),8S(79.9663)	sp|Q9HC35|EMAL4_HUMAN	Q9HC35	EMAL4_HUMAN	EML4	Echinoderm microtubule-associated protein-like 4			1	4.809698E7	MS/MS	STY:79.9663@AS(0.6971)PS(0.0444)PQPS(0.6293)S(0.6293)QPLQIHR;
ASPSTAGETPSGVK	AS[79.9663]PSTAGETPSGVK	K	R	149	162	14	2	2S(79.9663)	sp|Q9UI10-2|EI2BD_HUMAN	Q9UI10-2	EI2BD_HUMAN	EIF2B4	Isoform 2 of Translation initiation factor eIF-2B subunit delta		sp|Q9UI10-3|EI2BD_HUMAN, sp|Q9UI10|EI2BD_HUMAN	3	6.1363144E7	MS/MS	STY:79.9663@AS(0.8895)PS(0.0276)T(0.0276)AGET(0.0276)PS(0.0276)GVK;
ASPSPPPK	AS[79.9663]PS[79.9663]PPPK	R	R	625	632	8	2	2S(79.9663),4S(79.9663)	sp|Q8IYB3|SRRM1_HUMAN	Q8IYB3	SRRM1_HUMAN	SRRM1	Serine/arginine repetitive matrix protein 1		sp|Q8IYB3-2|SRRM1_HUMAN	9	1.90447456E8	MS/MS	STY:79.9663@AS(1.0000)PS(1.0000)PPPK;
ASPSPQPSSQPLQIHR	AS[79.9663]PS[79.9663]PQPSSQPLQIHR	R	Q	143	158	16	2,3	2S(79.9663),4S(79.9663)	sp|Q9HC35|EMAL4_HUMAN	Q9HC35	EMAL4_HUMAN	EML4	Echinoderm microtubule-associated protein-like 4			4	5.2464168E7	MS/MS	STY:79.9663@AS(0.9437)PS(0.9436)PQPS(0.0565)S(0.0561)QPLQIHR;
ASPVGDGNFR	AS[79.9663]PVGDGNFR	K	N	902	911	10	2	2S(79.9663)	sp|Q86YS7-3|C2CD5_HUMAN	Q86YS7-3	C2CD5_HUMAN	C2CD5	Isoform 3 of C2 domain-containing protein 5		sp|Q86YS7-2|C2CD5_HUMAN, sp|Q86YS7-4|C2CD5_HUMAN, sp|Q86YS7-5|C2CD5_HUMAN, sp|Q86YS7|C2CD5_HUMAN	1	0	MS/MS	STY:79.9663@AS(1.0000)PVGDGNFR;
ASSHSSQTQGGGSVTK	AS[79.9663]SHSSQTQGGGSVTK	R	K	402	417	16	2	2S(79.9663)	sp|P02545|LMNA_HUMAN	P02545	LMNA_HUMAN	LMNA	Prelamin-A/C		sp|P02545-2|LMNA_HUMAN, sp|P02545-3|LMNA_HUMAN, sp|P02545-4|LMNA_HUMAN, sp|P02545-5|LMNA_HUMAN, sp|P02545-6|LMNA_HUMAN	20	2.87868006E9	MS/MS	STY:79.9663@AS(0.9174)S(0.0296)HS(0.0109)S(0.0109)QT(0.0109)QGGGS(0.0101)VT(0.0101)K;
ASSHSSQTQGGGSVTK	AS[79.9663]SHSSQTQGGGS[79.9663]VTK	R	K	402	417	16	2	13S(79.9663),2S(79.9663)	sp|P02545|LMNA_HUMAN	P02545	LMNA_HUMAN	LMNA	Prelamin-A/C		sp|P02545-2|LMNA_HUMAN, sp|P02545-3|LMNA_HUMAN, sp|P02545-4|LMNA_HUMAN, sp|P02545-5|LMNA_HUMAN, sp|P02545-6|LMNA_HUMAN	1	4.9729404E7	MS/MS	STY:79.9663@AS(0.7462)S(0.0200)HS(0.0177)S(0.0181)QT(0.0218)QGGGS(0.5881)VT(0.5881)K;
ASSHSSQTQGGGSVTK	AS[79.9663]SHSSQT[79.9663]QGGGSVTK	R	K	402	417	16	2	2S(79.9663),8T(79.9663)	sp|P02545|LMNA_HUMAN	P02545	LMNA_HUMAN	LMNA	Prelamin-A/C		sp|P02545-2|LMNA_HUMAN, sp|P02545-3|LMNA_HUMAN, sp|P02545-4|LMNA_HUMAN, sp|P02545-5|LMNA_HUMAN, sp|P02545-6|LMNA_HUMAN	1	9.3316728E7	MS/MS	STY:79.9663@AS(0.4946)S(0.4946)HS(0.2019)S(0.0322)QT(0.6012)QGGGS(0.0877)VT(0.0877)K;
ASSHSSQTQGGGSVTK	AS[79.9663]SHSS[79.9663]QTQGGGSVTK	R	K	402	417	16	2	2S(79.9663),6S(79.9663)	sp|P02545|LMNA_HUMAN	P02545	LMNA_HUMAN	LMNA	Prelamin-A/C		sp|P02545-2|LMNA_HUMAN, sp|P02545-3|LMNA_HUMAN, sp|P02545-4|LMNA_HUMAN, sp|P02545-5|LMNA_HUMAN, sp|P02545-6|LMNA_HUMAN	3	1.56121088E8	MS/MS	STY:79.9663@AS(0.5713)S(0.5713)HS(0.0255)S(0.7229)QT(0.0351)QGGGS(0.0410)VT(0.0328)K;
ASSHSSQTQGGGSVTK	AS[79.9663]SHS[79.9663]SQTQGGGSVTK	R	K	402	417	16	2	2S(79.9663),5S(79.9663)	sp|P02545|LMNA_HUMAN	P02545	LMNA_HUMAN	LMNA	Prelamin-A/C		sp|P02545-2|LMNA_HUMAN, sp|P02545-3|LMNA_HUMAN, sp|P02545-4|LMNA_HUMAN, sp|P02545-5|LMNA_HUMAN, sp|P02545-6|LMNA_HUMAN	1	6.280436E7	MS/MS	STY:79.9663@AS(0.5252)S(0.5252)HS(0.6352)S(0.0159)QT(0.2342)QGGGS(0.0253)VT(0.0389)K;
ASSLEDLVLK	AS[79.9663]SLEDLVLK	R	E	254	263	10	2	2S(79.9663)	sp|Q15477|SKI2_HUMAN	Q15477	SKI2_HUMAN	SKIC2	Superkiller complex protein 2			9	1.0787036E8	MS/MS	STY:79.9663@AS(0.9049)S(0.0951)LEDLVLK;
ASSLGEIDESSELR	AS[79.9663]SLGEIDESSELR	R	V	565	578	14	2	2S(79.9663)	sp|Q16513-2|PKN2_HUMAN	Q16513-2	PKN2_HUMAN	PKN2	Isoform 2 of Serine/threonine-protein kinase N2		sp|Q16513-3|PKN2_HUMAN, sp|Q16513-4|PKN2_HUMAN, sp|Q16513-5|PKN2_HUMAN, sp|Q16513|PKN2_HUMAN	1	6.675614E7	MS/MS	STY:79.9663@AS(0.4871)S(0.4871)LGEIDES(0.0129)S(0.0129)ELR;
ASSLNFLNK	AS[79.9663]SLNFLNK	R	S	503	511	9	2	2S(79.9663)	sp|Q9H0B6-2|KLC2_HUMAN	Q9H0B6-2	KLC2_HUMAN	KLC2	Isoform 2 of Kinesin light chain 2		sp|Q9H0B6|KLC2_HUMAN	2	1.3423756E7	MS/MS	STY:79.9663@AS(0.5000)S(0.5000)LNFLNK;
ASSLNVLNVGGK	AS[79.9663]SLNVLNVGGK	R	A	598	609	12	2	2S(79.9663)	sp|Q07866-4|KLC1_HUMAN	Q07866-4	KLC1_HUMAN	KLC1	Isoform J of Kinesin light chain 1		sp|Q07866-6|KLC1_HUMAN, sp|Q07866-7|KLC1_HUMAN, sp|Q07866-9|KLC1_HUMAN	2	2.8890848E7	MS/MS	STY:79.9663@AS(0.5000)S(0.5000)LNVLNVGGK;
ASSLSESSPPK	AS[79.9663]SLSESSPPK	R	A	207	217	11	2	2S(79.9663)	sp|Q9UHB6-2|LIMA1_HUMAN	Q9UHB6-2	LIMA1_HUMAN	LIMA1	Isoform Alpha of LIM domain and actin-binding protein 1		sp|Q9UHB6-3|LIMA1_HUMAN, sp|Q9UHB6-4|LIMA1_HUMAN, sp|Q9UHB6-5|LIMA1_HUMAN, sp|Q9UHB6|LIMA1_HUMAN	4	1.07786376E8	MS/MS	STY:79.9663@AS(0.9404)S(0.0149)LS(0.0149)ES(0.0149)S(0.0149)PPK;
ASSLSESSPPK	AS[79.9663]SLSESS[79.9663]PPK	R	A	207	217	11	2	2S(79.9663),8S(79.9663)	sp|Q9UHB6-2|LIMA1_HUMAN	Q9UHB6-2	LIMA1_HUMAN	LIMA1	Isoform Alpha of LIM domain and actin-binding protein 1		sp|Q9UHB6-3|LIMA1_HUMAN, sp|Q9UHB6-4|LIMA1_HUMAN, sp|Q9UHB6-5|LIMA1_HUMAN, sp|Q9UHB6|LIMA1_HUMAN	2	2.08564016E8	MS/MS	STY:79.9663@AS(0.9388)S(0.0434)LS(0.0362)ES(0.0427)S(0.9388)PPK;
ASSPAQCVTPVQTVV	AS[79.9663]SPAQC[57.0215]VTPVQTVV	R	-	557	571	15	2	2S(79.9663),7C(57.0215)	sp|Q13614-2|MTMR2_HUMAN	Q13614-2	MTMR2_HUMAN	MTMR2	Isoform 2 of Myotubularin-related protein 2		sp|Q13614|MTMR2_HUMAN	1	4.7942152E7	MS/MS	STY:79.9663@AS(0.4813)S(0.4813)PAQCVT(0.0125)PVQT(0.0248)VV;
ASSPPDR	AS[79.9663]SPPDR	R	I	75	81	7	2	2S(79.9663)	sp|Q9NWB6-2|ARGL1_HUMAN	Q9NWB6-2	ARGL1_HUMAN	ARGLU1	Isoform 2 of Arginine and glutamate-rich protein 1		sp|Q9NWB6|ARGL1_HUMAN	1	1.689401E7	MS/MS	STY:79.9663@AS(0.5000)S(0.5000)PPDR;
ASSPSEHGPR	AS[79.9663]SPSEHGPR	R	K	220	229	10	2	2S(79.9663)	sp|Q9NSU2-1|TREX1_HUMAN	Q9NSU2-1	TREX1_HUMAN	TREX1	Isoform 1 of Three-prime repair exonuclease 1		sp|Q9NSU2-2|TREX1_HUMAN, sp|Q9NSU2|TREX1_HUMAN	1	5.8080068E7	MS/MS	STY:79.9663@AS(0.4914)S(0.4914)PS(0.0172)EHGPR;
ASSPSPLTIGTPESQR	AS[79.9663]SPSPLTIGTPESQR	K	K	521	536	16	2	2S(79.9663)	sp|Q9NPI6|DCP1A_HUMAN	Q9NPI6	DCP1A_HUMAN	DCP1A	mRNA-decapping enzyme 1A		sp|Q9NPI6-2|DCP1A_HUMAN	1	0	MS/MS	STY:79.9663@AS(0.2702)S(0.2702)PS(0.2702)PLT(0.1664)IGT(0.0115)PES(0.0115)QR;
ASSRSPVFTPR	AS[79.9663]SRSPVFT[79.9663]PR	R	V	767	777	11	2	2S(79.9663),9T(79.9663)	sp|P52735-3|VAV2_HUMAN	P52735-3	VAV2_HUMAN	VAV2	Isoform 3 of Guanine nucleotide exchange factor VAV2			1	9.325316E7	MS/MS	STY:79.9663@AS(0.7251)S(0.0515)RS(0.4807)PVFT(0.7426)PR;
ASSSPEPPAVAELSDSGQQEPEDGGPAPGEASQGSDSEGGAQGLASASR	AS[79.9663]SSPEPPAVAELSDSGQQEPEDGGPAPGEAS[79.9663]QGS[79.9663]DSEGGAQGLASASR	K	D	1165	1213	49	4	2S(79.9663),32S(79.9663),35S(79.9663)	sp|Q9C0C9|UBE2O_HUMAN	Q9C0C9	UBE2O_HUMAN	UBE2O	(E3-independent) E2 ubiquitin-conjugating enzyme			1	0	MS/MS	STY:79.9663@AS(0.5446)S(0.0367)S(0.0367)PEPPAVAELS(0.4385)DS(0.4385)GQQEPEDGGPAPGEAS(0.6247)QGS(0.6230)DS(0.0417)EGGAQGLAS(0.1170)AS(0.0987)R;
ASSVTTFTGEPNTCPR	AS[79.9663]SVTTFTGEPNTC[57.0215]PR	R	C	187	202	16	2	14C(57.0215),2S(79.9663)	sp|P52943-2|CRIP2_HUMAN	P52943-2	CRIP2_HUMAN	CRIP2	Isoform 2 of Cysteine-rich protein 2		sp|P52943|CRIP2_HUMAN	1	7503555	MS/MS	STY:79.9663@AS(0.3272)S(0.3272)VT(0.3272)T(0.0063)FT(0.0061)GEPNT(0.0060)CPR;
ASSHSSQTQGGGSVTK	AS[79.9663]S[79.9663]HSSQTQGGGSVTK	R	K	402	417	16	2	2S(79.9663),3S(79.9663)	sp|P02545|LMNA_HUMAN	P02545	LMNA_HUMAN	LMNA	Prelamin-A/C		sp|P02545-2|LMNA_HUMAN, sp|P02545-3|LMNA_HUMAN, sp|P02545-4|LMNA_HUMAN, sp|P02545-5|LMNA_HUMAN, sp|P02545-6|LMNA_HUMAN	10	1.43946995E9	MS/MS	STY:79.9663@AS(0.8948)S(0.9427)HS(0.0294)S(0.0294)QT(0.0294)QGGGS(0.0371)VT(0.0371)K;
ASSHSSQTQGGGSVTK	AS[79.9663]S[79.9663]HS[79.9663]SQTQGGGSVTK	R	K	402	417	16	2	2S(79.9663),3S(79.9663),5S(79.9663)	sp|P02545|LMNA_HUMAN	P02545	LMNA_HUMAN	LMNA	Prelamin-A/C		sp|P02545-2|LMNA_HUMAN, sp|P02545-3|LMNA_HUMAN, sp|P02545-4|LMNA_HUMAN, sp|P02545-5|LMNA_HUMAN, sp|P02545-6|LMNA_HUMAN	1	2.2149444E7	MS/MS	STY:79.9663@AS(0.4921)S(0.4921)HS(0.4921)S(0.4921)QT(0.4921)QGGGS(0.4921)VT(0.0473)K;
ASSLSESSPPK	AS[79.9663]S[79.9663]LSESSPPK	R	A	207	217	11	2	2S(79.9663),3S(79.9663)	sp|Q9UHB6-2|LIMA1_HUMAN	Q9UHB6-2	LIMA1_HUMAN	LIMA1	Isoform Alpha of LIM domain and actin-binding protein 1		sp|Q9UHB6-3|LIMA1_HUMAN, sp|Q9UHB6-4|LIMA1_HUMAN, sp|Q9UHB6-5|LIMA1_HUMAN, sp|Q9UHB6|LIMA1_HUMAN	7	2.08564016E8	MS/MS	STY:79.9663@AS(0.6454)S(0.6454)LS(0.6454)ES(0.0319)S(0.0319)PPK;
ASSPAESSPEDSGYMR	AS[79.9663]S[79.9663]PAESSPEDSGYMR	K	M	729	744	16	2	2S(79.9663),3S(79.9663)	sp|Q9Y4H2|IRS2_HUMAN	Q9Y4H2	IRS2_HUMAN	IRS2	Insulin receptor substrate 2			1	0	MS/MS	STY:79.9663@AS(0.4894)S(0.4894)PAES(0.4894)S(0.4894)PEDS(0.0212)GY(0.0212)MR;
ASSPSPLTIGTPESQR	AS[79.9663]S[79.9663]PSPLTIGTPESQR	K	K	521	536	16	2	2S(79.9663),3S(79.9663)	sp|Q9NPI6|DCP1A_HUMAN	Q9NPI6	DCP1A_HUMAN	DCP1A	mRNA-decapping enzyme 1A		sp|Q9NPI6-2|DCP1A_HUMAN	1	0	MS/MS	STY:79.9663@AS(0.8764)S(0.8764)PS(0.0380)PLT(0.0632)IGT(0.0711)PES(0.0750)QR;
ASSSPEPPAVAELSDSGQQEPEDGGPAPGEASQGSDSEGGAQGLASASR	AS[79.9663]S[79.9663]SPEPPAVAELSDSGQQEPEDGGPAPGEASQGSDSEGGAQGLASASR	K	D	1165	1213	49	4	2S(79.9663),3S(79.9663)	sp|Q9C0C9|UBE2O_HUMAN	Q9C0C9	UBE2O_HUMAN	UBE2O	(E3-independent) E2 ubiquitin-conjugating enzyme			1	3.3065124E7	MS/MS	STY:79.9663@AS(0.2209)S(0.2209)S(0.2209)PEPPAVAELS(0.2209)DS(0.2209)GQQEPEDGGPAPGEAS(0.1887)QGS(0.1887)DS(0.1717)EGGAQGLAS(0.1731)AS(0.1731)R;
ASTASPCNNNINAATAVALQEPR	AS[79.9663]TASPC[57.0215]NNNINAATAVALQEPR	R	K	592	614	23	3	2S(79.9663),7C(57.0215)	sp|Q71RC2-3|LARP4_HUMAN	Q71RC2-3	LARP4_HUMAN	LARP4	Isoform 3 of La-related protein 4		sp|Q71RC2-4|LARP4_HUMAN, sp|Q71RC2-5|LARP4_HUMAN, sp|Q71RC2-6|LARP4_HUMAN, sp|Q71RC2|LARP4_HUMAN	1	2.9153098E7	MS/MS	STY:79.9663@AS(0.3305)T(0.3305)AS(0.3305)PCNNNINAAT(0.0086)AVALQEPR;
ASTTSLSGSDSETEGK	AS[79.9663]T[79.9663]TSLS[79.9663]GSDSETEGK	K	Q	45	60	16	2	2S(79.9663),3T(79.9663),7S(79.9663)	sp|Q8N1G2|CMTR1_HUMAN	Q8N1G2	CMTR1_HUMAN	CMTR1	Cap-specific mRNA (nucleoside-2'-O-)-methyltransferase 1			1	3.6207628E7	MS/MS	STY:79.9663@AS(0.5715)T(0.5715)T(0.5715)S(0.5715)LS(0.6359)GS(0.0285)DS(0.0258)ET(0.0238)EGK;
ASVASEVSTTSSTSKPPTGR	AS[79.9663]VASEVSTTSSTSKPPT[79.9663]GR	K	R	1122	1141	20	3	18T(79.9663),2S(79.9663)	sp|Q5SW79|CE170_HUMAN	Q5SW79	CE170_HUMAN	CEP170	Centrosomal protein of 170 kDa		sp|Q5SW79-2|CE170_HUMAN, sp|Q5SW79-3|CE170_HUMAN	1	0	MS/MS	STY:79.9663@AS(0.1945)VAS(0.1945)EVS(0.1945)T(0.1945)T(0.1945)S(0.1945)S(0.1945)T(0.1945)S(0.1945)KPPT(0.2494)GR;
ASVSGPNSPSETR	AS[79.9663]VSGPNSPSET[79.9663]R	K	R	89	101	13	2	12T(79.9663),2S(79.9663)	sp|O15344-2|TRI18_HUMAN	O15344-2	TRI18_HUMAN	MID1	Isoform 2 of E3 ubiquitin-protein ligase Midline-1		sp|O15344|TRI18_HUMAN	1	1.9084654E7	MS/MS	STY:79.9663@AS(0.3875)VS(0.3875)GPNS(0.3875)PS(0.3875)ET(0.4499)R;
ASVSPMDEPVPDSESPIEK	AS[79.9663]VSPMDEPVPDSESPIEK	R	V	1375	1393	19	2	2S(79.9663)	sp|P46821|MAP1B_HUMAN	P46821	MAP1B_HUMAN	MAP1B	Microtubule-associated protein 1B			2	4.0368624E7	MS/MS	STY:79.9663@AS(0.4515)VS(0.4515)PMDEPVPDS(0.0485)ES(0.0485)PIEK;
ASVSPMDEPVPDSESPIEK	AS[79.9663]VSPMDEPVPDSES[79.9663]PIEK	R	V	1375	1393	19	2	15S(79.9663),2S(79.9663)	sp|P46821|MAP1B_HUMAN	P46821	MAP1B_HUMAN	MAP1B	Microtubule-associated protein 1B			1	8.3003432E7	MS/MS	STY:79.9663@AS(0.5131)VS(0.5131)PMDEPVPDS(0.4262)ES(0.5476)PIEK;
ASVSPMDEPVPDSESPIEK	AS[79.9663]VSPMDEPVPDS[79.9663]ESPIEK	R	V	1375	1393	19	2	13S(79.9663),2S(79.9663)	sp|P46821|MAP1B_HUMAN	P46821	MAP1B_HUMAN	MAP1B	Microtubule-associated protein 1B			1	8.3003432E7	MS/MS	STY:79.9663@AS(0.6265)VS(0.6265)PMDEPVPDS(0.6937)ES(0.0533)PIEK;
ASVSPMDEPVPDSESPIEK	AS[79.9663]VSPMDEPVPDS[79.9663]ES[79.9663]PIEK	R	V	1375	1393	19	3	13S(79.9663),15S(79.9663),2S(79.9663)	sp|P46821|MAP1B_HUMAN	P46821	MAP1B_HUMAN	MAP1B	Microtubule-associated protein 1B			1	0	MS/MS	STY:79.9663@AS(0.7370)VS(0.7370)PMDEPVPDS(0.7630)ES(0.7630)PIEK;
ASVSGPNSPSETR	AS[79.9663]VS[79.9663]GPNSPSETR	K	R	89	101	13	2	2S(79.9663),4S(79.9663)	sp|O15344-2|TRI18_HUMAN	O15344-2	TRI18_HUMAN	MID1	Isoform 2 of E3 ubiquitin-protein ligase Midline-1		sp|O15344|TRI18_HUMAN	2	5.1886196E7	MS/MS	STY:79.9663@AS(0.7144)VS(0.6156)GPNS(0.6156)PS(0.0272)ET(0.0272)R;
ASVVDPSTESSPAPQEGSEQPASPASPLSSR	AS[79.9663]VVDPSTESSPAPQEGSEQPAS[79.9663]PAS[79.9663]PLSSR	K	Q	410	440	31	3	23S(79.9663),26S(79.9663),2S(79.9663)	sp|Q66K14-2|TBC9B_HUMAN	Q66K14-2	TBC9B_HUMAN	TBC1D9B	Isoform 2 of TBC1 domain family member 9B		sp|Q66K14|TBC9B_HUMAN	1	0	MS/MS	STY:79.9663@AS(0.6160)VVDPS(0.0342)T(0.2553)ES(0.2553)S(0.2553)PAPQEGS(0.2553)EQPAS(0.6401)PAS(0.6466)PLS(0.0210)S(0.0210)R;
ASWASENGETDAEGTQMTPAK	AS[79.9663]WASENGETDAEGTQMTPAK	R	R	1864	1884	21	2	2S(79.9663)	sp|Q12789-3|TF3C1_HUMAN	Q12789-3	TF3C1_HUMAN	GTF3C1	Isoform 2 of General transcription factor 3C polypeptide 1		sp|Q12789|TF3C1_HUMAN	2	0	MS/MS	STY:79.9663@AS(0.3994)WAS(0.3994)ENGET(0.0228)DAEGT(0.0621)QMT(0.1163)PAK;
ASWASENGETDAEGTQMTPAK	AS[79.9663]WASENGET[79.9663]DAEGTQMTPAK	R	R	1864	1884	21	2	10T(79.9663),2S(79.9663)	sp|Q12789-3|TF3C1_HUMAN	Q12789-3	TF3C1_HUMAN	GTF3C1	Isoform 2 of General transcription factor 3C polypeptide 1		sp|Q12789|TF3C1_HUMAN	1	0	MS/MS	STY:79.9663@AS(0.4831)WAS(0.4831)ENGET(0.5610)DAEGT(0.2364)QMT(0.2364)PAK;
ASWASENGETDAEGTQMTPAK	AS[79.9663]WAS[79.9663]ENGETDAEGTQMTPAK	R	R	1864	1884	21	2	2S(79.9663),5S(79.9663)	sp|Q12789-3|TF3C1_HUMAN	Q12789-3	TF3C1_HUMAN	GTF3C1	Isoform 2 of General transcription factor 3C polypeptide 1		sp|Q12789|TF3C1_HUMAN	3	0	MS/MS	STY:79.9663@AS(0.5867)WAS(0.5867)ENGET(0.5867)DAEGT(0.1199)QMT(0.1199)PAK;
ATAPQTQHVSPMR	ATAPQTQHVS[79.9663]PMR	R	Q	124	136	13	2	10S(79.9663)	sp|P29692|EF1D_HUMAN	P29692	EF1D_HUMAN	EEF1D	Elongation factor 1-delta		sp|P29692-2|EF1D_HUMAN, sp|P29692-3|EF1D_HUMAN, sp|P29692-4|EF1D_HUMAN	13	1.95967386E9	MS/MS	STY:79.9663@AT(0.0273)APQT(0.0275)QHVS(0.9452)PMR;
ATAPQTQHVSPMR	ATAPQTQHVS[79.9663]PM[15.9949]R	R	Q	124	136	13	2,3	10S(79.9663),12M(15.9949)	sp|P29692|EF1D_HUMAN	P29692	EF1D_HUMAN	EEF1D	Elongation factor 1-delta		sp|P29692-2|EF1D_HUMAN, sp|P29692-3|EF1D_HUMAN, sp|P29692-4|EF1D_HUMAN	14	8.6287782E8	MS/MS	M:15.9949@ATAPQTQHVSPM(1.0000)R;STY:79.9663@AT(0.0273)APQT(0.0275)QHVS(0.9452)PMR;
ATAPQTQHVSPMR	ATAPQT[79.9663]QHVSPMR	R	Q	124	136	13	2,3	6T(79.9663)	sp|P29692|EF1D_HUMAN	P29692	EF1D_HUMAN	EEF1D	Elongation factor 1-delta		sp|P29692-2|EF1D_HUMAN, sp|P29692-3|EF1D_HUMAN, sp|P29692-4|EF1D_HUMAN	9	2.35979546E9	MS/MS	STY:79.9663@AT(0.0279)APQT(0.9404)QHVS(0.0317)PMR;
ATAPQTQHVSPMR	ATAPQT[79.9663]QHVSPM[15.9949]R	R	Q	124	136	13	2	12M(15.9949),6T(79.9663)	sp|P29692|EF1D_HUMAN	P29692	EF1D_HUMAN	EEF1D	Elongation factor 1-delta		sp|P29692-2|EF1D_HUMAN, sp|P29692-3|EF1D_HUMAN, sp|P29692-4|EF1D_HUMAN	10	5.4139008E8	MS/MS	M:15.9949@ATAPQTQHVSPM(1.0000)R;STY:79.9663@AT(0.0309)APQT(0.9141)QHVS(0.0551)PMR;
ATAQPPAPLSPDSGSPSPDSGSASPVEEEDVGSSEK	ATAQPPAPLSPDSGSPSPDSGSASPVEEEDVGS[79.9663]S[79.9663]EK	R	L	15	50	36	3	33S(79.9663),34S(79.9663)	sp|O95361|TRI16_HUMAN	O95361	TRI16_HUMAN	TRIM16	Tripartite motif-containing protein 16			1	0	MS/MS	STY:79.9663@AT(0.1196)AQPPAPLS(0.1795)PDS(0.1795)GS(0.1795)PS(0.1610)PDS(0.0688)GS(0.1104)AS(0.1104)PVEEEDVGS(0.4457)S(0.4457)EK;
ATAQPPAPLSPDSGSPSPDSGSASPVEEEDVGSSEK	ATAQPPAPLSPDSGSPSPDSGSAS[79.9663]PVEEEDVGSSEK	R	L	15	50	36	3	24S(79.9663)	sp|O95361|TRI16_HUMAN	O95361	TRI16_HUMAN	TRIM16	Tripartite motif-containing protein 16			1	0	MS/MS	STY:79.9663@AT(0.0076)AQPPAPLS(0.0063)PDS(0.0128)GS(0.1851)PS(0.1851)PDS(0.1851)GS(0.1851)AS(0.2274)PVEEEDVGS(0.0028)S(0.0027)EK;
ATAQPPAPLSPDSGSPSPDSGSASPVEEEDVGSSEK	ATAQPPAPLSPDSGSPSPDSGS[79.9663]ASPVEEEDVGSSEK	R	L	15	50	36	3	22S(79.9663)	sp|O95361|TRI16_HUMAN	O95361	TRI16_HUMAN	TRIM16	Tripartite motif-containing protein 16			2	0	MS/MS	STY:79.9663@AT(0.0674)AQPPAPLS(0.1061)PDS(0.0751)GS(0.0751)PS(0.0751)PDS(0.0070)GS(0.2701)AS(0.2701)PVEEEDVGS(0.0269)S(0.0269)EK;
ATAQPPAPLSPDSGSPSPDSGSASPVEEEDVGSSEK	ATAQPPAPLSPDSGSPSPDS[79.9663]GSASPVEEEDVGSSEK	R	L	15	50	36	3	20S(79.9663)	sp|O95361|TRI16_HUMAN	O95361	TRI16_HUMAN	TRIM16	Tripartite motif-containing protein 16			2	2.03848704E8	MS/MS	STY:79.9663@AT(0.0119)AQPPAPLS(0.0131)PDS(0.0076)GS(0.0076)PS(0.0076)PDS(0.9121)GS(0.0078)AS(0.0078)PVEEEDVGS(0.0122)S(0.0122)EK;
ATAQPPAPLSPDSGSPSPDSGSASPVEEEDVGSSEK	ATAQPPAPLSPDSGSPSPDS[79.9663]GSAS[79.9663]PVEEEDVGSSEK	R	L	15	50	36	3	20S(79.9663),24S(79.9663)	sp|O95361|TRI16_HUMAN	O95361	TRI16_HUMAN	TRIM16	Tripartite motif-containing protein 16			3	4.25329344E8	MS/MS	STY:79.9663@AT(0.0723)AQPPAPLS(0.0723)PDS(0.0116)GS(0.0120)PS(0.0123)PDS(0.5141)GS(0.5141)AS(0.7340)PVEEEDVGS(0.0287)S(0.0287)EK;
ATAQPPAPLSPDSGSPSPDSGSASPVEEEDVGSSEK	ATAQPPAPLSPDSGSPSPDS[79.9663]GS[79.9663]ASPVEEEDVGSSEK	R	L	15	50	36	3	20S(79.9663),22S(79.9663)	sp|O95361|TRI16_HUMAN	O95361	TRI16_HUMAN	TRIM16	Tripartite motif-containing protein 16			1	0	MS/MS	STY:79.9663@AT(0.0547)AQPPAPLS(0.0395)PDS(0.3113)GS(0.2492)PS(0.1767)PDS(0.4946)GS(0.4946)AS(0.0170)PVEEEDVGS(0.0812)S(0.0812)EK;
ATAQPPAPLSPDSGSPSPDSGSASPVEEEDVGSSEK	ATAQPPAPLSPDSGSPSPDS[79.9663]GS[79.9663]AS[79.9663]PVEEEDVGSSEK	R	L	15	50	36	3	20S(79.9663),22S(79.9663),24S(79.9663)	sp|O95361|TRI16_HUMAN	O95361	TRI16_HUMAN	TRIM16	Tripartite motif-containing protein 16			1	1.0839008E8	MS/MS	STY:79.9663@AT(0.0800)AQPPAPLS(0.2789)PDS(0.2789)GS(0.0996)PS(0.0608)PDS(0.6768)GS(0.6768)AS(0.6820)PVEEEDVGS(0.0831)S(0.0831)EK;
ATAQPPAPLSPDSGSPSPDSGSASPVEEEDVGSSEK	ATAQPPAPLSPDSGSPS[79.9663]PDSGSASPVEEEDVGSSEK	R	L	15	50	36	3	17S(79.9663)	sp|O95361|TRI16_HUMAN	O95361	TRI16_HUMAN	TRIM16	Tripartite motif-containing protein 16			3	1.1607516E8	MS/MS	STY:79.9663@AT(0.0765)AQPPAPLS(0.0058)PDS(0.0075)GS(0.0123)PS(0.6518)PDS(0.0062)GS(0.1067)AS(0.1067)PVEEEDVGS(0.0132)S(0.0132)EK;
ATAQPPAPLSPDSGSPSPDSGSASPVEEEDVGSSEK	ATAQPPAPLSPDSGSPS[79.9663]PDS[79.9663]GSAS[79.9663]PVEEEDVGSSEK	R	L	15	50	36	3	17S(79.9663),20S(79.9663),24S(79.9663)	sp|O95361|TRI16_HUMAN	O95361	TRI16_HUMAN	TRIM16	Tripartite motif-containing protein 16			1	0	MS/MS	STY:79.9663@AT(0.2604)AQPPAPLS(0.1669)PDS(0.1669)GS(0.1387)PS(0.4204)PDS(0.4204)GS(0.0640)AS(0.5215)PVEEEDVGS(0.4204)S(0.4204)EK;
ATAQPPAPLSPDSGSPSPDSGSASPVEEEDVGSSEK	ATAQPPAPLSPDSGS[79.9663]PSPDSGSASPVEEEDVGSSEK	R	L	15	50	36	3	15S(79.9663)	sp|O95361|TRI16_HUMAN	O95361	TRI16_HUMAN	TRIM16	Tripartite motif-containing protein 16			1	2.24453424E8	MS/MS	STY:79.9663@AT(0.0045)AQPPAPLS(0.1879)PDS(0.1879)GS(0.1902)PS(0.1902)PDS(0.1902)GS(0.0031)AS(0.0031)PVEEEDVGS(0.0215)S(0.0215)EK;
ATAQPPAPLSPDSGSPSPDSGSASPVEEEDVGSSEK	ATAQPPAPLSPDSGS[79.9663]PSPDSGSAS[79.9663]PVEEEDVGSSEK	R	L	15	50	36	3	15S(79.9663),24S(79.9663)	sp|O95361|TRI16_HUMAN	O95361	TRI16_HUMAN	TRIM16	Tripartite motif-containing protein 16			1	7.2058288E7	MS/MS	STY:79.9663@AT(0.1911)AQPPAPLS(0.0116)PDS(0.0125)GS(0.5445)PS(0.2149)PDS(0.1086)GS(0.0262)AS(0.6011)PVEEEDVGS(0.1447)S(0.1447)EK;
ATAQPPAPLSPDSGSPSPDSGSASPVEEEDVGSSEK	ATAQPPAPLSPDSGS[79.9663]PS[79.9663]PDSGSASPVEEEDVGSSEK	R	L	15	50	36	3	15S(79.9663),17S(79.9663)	sp|O95361|TRI16_HUMAN	O95361	TRI16_HUMAN	TRIM16	Tripartite motif-containing protein 16			1	7.2058288E7	MS/MS	STY:79.9663@AT(0.1576)AQPPAPLS(0.0419)PDS(0.0148)GS(0.5334)PS(0.4505)PDS(0.4123)GS(0.2606)AS(0.0210)PVEEEDVGS(0.0539)S(0.0539)EK;
ATAQPPAPLSPDSGSPSPDSGSASPVEEEDVGSSEK	ATAQPPAPLSPDSGS[79.9663]PS[79.9663]PDS[79.9663]GSASPVEEEDVGSSEK	R	L	15	50	36	3	15S(79.9663),17S(79.9663),20S(79.9663)	sp|O95361|TRI16_HUMAN	O95361	TRI16_HUMAN	TRIM16	Tripartite motif-containing protein 16			1	0	MS/MS	STY:79.9663@AT(0.0206)AQPPAPLS(0.0211)PDS(0.0321)GS(0.6047)PS(0.5528)PDS(0.4851)GS(0.4851)AS(0.4851)PVEEEDVGS(0.1567)S(0.1567)EK;
ATAQPPAPLSPDSGSPSPDSGSASPVEEEDVGSSEK	ATAQPPAPLSPDS[79.9663]GSPSPDSGSASPVEEEDVGSSEK	R	L	15	50	36	3	13S(79.9663)	sp|O95361|TRI16_HUMAN	O95361	TRI16_HUMAN	TRIM16	Tripartite motif-containing protein 16			2	9.2703152E7	MS/MS	STY:79.9663@AT(0.0156)AQPPAPLS(0.0188)PDS(0.8633)GS(0.0138)PS(0.0138)PDS(0.0093)GS(0.0074)AS(0.0072)PVEEEDVGS(0.0325)S(0.0183)EK;
ATAQPPAPLSPDSGSPSPDSGSASPVEEEDVGSSEK	ATAQPPAPLSPDS[79.9663]GSPSPDSGSAS[79.9663]PVEEEDVGSSEK	R	L	15	50	36	4	13S(79.9663),24S(79.9663)	sp|O95361|TRI16_HUMAN	O95361	TRI16_HUMAN	TRIM16	Tripartite motif-containing protein 16			1	1.3766267E7	MS/MS	STY:79.9663@AT(0.0107)AQPPAPLS(0.0107)PDS(0.4738)GS(0.4738)PS(0.0493)PDS(0.1290)GS(0.1290)AS(0.6762)PVEEEDVGS(0.0238)S(0.0238)EK;
ATAQPPAPLSPDSGSPSPDSGSASPVEEEDVGSSEK	ATAQPPAPLSPDS[79.9663]GS[79.9663]PSPDSGSASPVEEEDVGSSEK	R	L	15	50	36	3	13S(79.9663),15S(79.9663)	sp|O95361|TRI16_HUMAN	O95361	TRI16_HUMAN	TRIM16	Tripartite motif-containing protein 16			1	0	MS/MS	STY:79.9663@AT(0.0140)AQPPAPLS(0.0216)PDS(0.8401)GS(0.8243)PS(0.0663)PDS(0.0660)GS(0.0557)AS(0.0310)PVEEEDVGS(0.0406)S(0.0406)EK;
ATAQPPAPLSPDSGSPSPDSGSASPVEEEDVGSSEK	ATAQPPAPLSPDS[79.9663]GS[79.9663]PS[79.9663]PDSGSASPVEEEDVGSSEK	R	L	15	50	36	3	13S(79.9663),15S(79.9663),17S(79.9663)	sp|O95361|TRI16_HUMAN	O95361	TRI16_HUMAN	TRIM16	Tripartite motif-containing protein 16			1	0	MS/MS	STY:79.9663@AT(0.0528)AQPPAPLS(0.0528)PDS(0.4774)GS(0.4774)PS(0.5509)PDS(0.4007)GS(0.3127)AS(0.3127)PVEEEDVGS(0.1813)S(0.1813)EK;
ATAQPPAPLSPDSGSPSPDSGSASPVEEEDVGSSEK	ATAQPPAPLS[79.9663]PDSGSPSPDSGSASPVEEEDVGSSEK	R	L	15	50	36	3	10S(79.9663)	sp|O95361|TRI16_HUMAN	O95361	TRI16_HUMAN	TRIM16	Tripartite motif-containing protein 16			8	3.35598976E8	MS/MS	STY:79.9663@AT(0.0448)AQPPAPLS(0.8674)PDS(0.0093)GS(0.0083)PS(0.0107)PDS(0.0098)GS(0.0157)AS(0.0084)PVEEEDVGS(0.0110)S(0.0146)EK;
ATAQPPAPLSPDSGSPSPDSGSASPVEEEDVGSSEK	ATAQPPAPLS[79.9663]PDSGSPSPDSGSASPVEEEDVGSS[79.9663]EK	R	L	15	50	36	3	10S(79.9663),34S(79.9663)	sp|O95361|TRI16_HUMAN	O95361	TRI16_HUMAN	TRIM16	Tripartite motif-containing protein 16			1	0	MS/MS	STY:79.9663@AT(0.2367)AQPPAPLS(0.5182)PDS(0.2648)GS(0.2648)PS(0.0537)PDS(0.0164)GS(0.0164)AS(0.0248)PVEEEDVGS(0.0185)S(0.5857)EK;
ATAQPPAPLSPDSGSPSPDSGSASPVEEEDVGSSEK	ATAQPPAPLS[79.9663]PDSGSPSPDS[79.9663]GSASPVEEEDVGSSEK	R	L	15	50	36	3	10S(79.9663),20S(79.9663)	sp|O95361|TRI16_HUMAN	O95361	TRI16_HUMAN	TRIM16	Tripartite motif-containing protein 16			1	7.2058288E7	MS/MS	STY:79.9663@AT(0.0677)AQPPAPLS(0.7328)PDS(0.4004)GS(0.0961)PS(0.0194)PDS(0.5972)GS(0.0121)AS(0.0121)PVEEEDVGS(0.0318)S(0.0306)EK;
ATAQPPAPLSPDSGSPSPDSGSASPVEEEDVGSSEK	ATAQPPAPLS[79.9663]PDSGSPSPDS[79.9663]GS[79.9663]ASPVEEEDVGSSEK	R	L	15	50	36	3	10S(79.9663),20S(79.9663),22S(79.9663)	sp|O95361|TRI16_HUMAN	O95361	TRI16_HUMAN	TRIM16	Tripartite motif-containing protein 16			1	0	MS/MS	STY:79.9663@AT(0.0704)AQPPAPLS(0.8853)PDS(0.0485)GS(0.0485)PS(0.0485)PDS(0.8875)GS(0.8861)AS(0.0430)PVEEEDVGS(0.0410)S(0.0410)EK;
ATAQPPAPLSPDSGSPSPDSGSASPVEEEDVGSSEK	ATAQPPAPLS[79.9663]PDSGSPS[79.9663]PDSGS[79.9663]ASPVEEEDVGSSEK	R	L	15	50	36	3	10S(79.9663),17S(79.9663),22S(79.9663)	sp|O95361|TRI16_HUMAN	O95361	TRI16_HUMAN	TRIM16	Tripartite motif-containing protein 16			1	0	MS/MS	STY:79.9663@AT(0.4418)AQPPAPLS(0.4469)PDS(0.4469)GS(0.0325)PS(0.4518)PDS(0.0385)GS(0.5558)AS(0.3208)PVEEEDVGS(0.1325)S(0.1325)EK;
ATAQPPAPLSPDSGSPSPDSGSASPVEEEDVGSSEK	ATAQPPAPLS[79.9663]PDS[79.9663]GSPSPDSGSASPVEEEDVGSSEK	R	L	15	50	36	3,4	10S(79.9663),13S(79.9663)	sp|O95361|TRI16_HUMAN	O95361	TRI16_HUMAN	TRIM16	Tripartite motif-containing protein 16			4	4.999164E7	MS/MS	STY:79.9663@AT(0.0193)AQPPAPLS(0.7526)PDS(0.7526)GS(0.0270)PS(0.0270)PDS(0.1386)GS(0.1386)AS(0.1052)PVEEEDVGS(0.0196)S(0.0196)EK;
ATAQPPAPLSPDSGSPSPDSGSASPVEEEDVGSSEK	ATAQPPAPLS[79.9663]PDS[79.9663]GSPSPDS[79.9663]GSASPVEEEDVGSSEK	R	L	15	50	36	3	10S(79.9663),13S(79.9663),20S(79.9663)	sp|O95361|TRI16_HUMAN	O95361	TRI16_HUMAN	TRIM16	Tripartite motif-containing protein 16			1	0	MS/MS	STY:79.9663@AT(0.2808)AQPPAPLS(0.4804)PDS(0.4804)GS(0.1564)PS(0.1564)PDS(0.3985)GS(0.3985)AS(0.3985)PVEEEDVGS(0.1251)S(0.1251)EK;
ATAQPPAPLSPDSGSPSPDSGSASPVEEEDVGSSEK	ATAQPPAPLS[79.9663]PDS[79.9663]GSPS[79.9663]PDSGSASPVEEEDVGSSEK	R	L	15	50	36	3	10S(79.9663),13S(79.9663),17S(79.9663)	sp|O95361|TRI16_HUMAN	O95361	TRI16_HUMAN	TRIM16	Tripartite motif-containing protein 16			1	0	MS/MS	STY:79.9663@AT(0.1032)AQPPAPLS(0.3698)PDS(0.3698)GS(0.3622)PS(0.3686)PDS(0.3634)GS(0.3634)AS(0.3369)PVEEEDVGS(0.1813)S(0.1813)EK;
ATDDDMQSLASLMSVK	ATDDDMQS[79.9663]LASLMS[79.9663]VK	R	P	163	178	16	2	14S(79.9663),8S(79.9663)	sp|Q8N3D4|EH1L1_HUMAN	Q8N3D4	EH1L1_HUMAN	EHBP1L1	EH domain-binding protein 1-like protein 1			1	0	MS/MS	STY:79.9663@AT(0.5738)DDDMQS(0.6374)LAS(0.1942)LMS(0.5946)VK;
ATDSDLSSPR	ATDSDLS[79.9663]SPR	K	H	351	360	10	2	7S(79.9663)	sp|Q9BRD0|BUD13_HUMAN	Q9BRD0	BUD13_HUMAN	BUD13	BUD13 homolog		sp|Q9BRD0-2|BUD13_HUMAN	1	1.5789601E7	MS/MS	STY:79.9663@AT(0.0175)DS(0.0172)DLS(0.4826)S(0.4826)PR;
ATEDFLGSSSGYSSEDDYVGYSDVDQQSSSSR	ATEDFLGSSSGYSSEDDYVGYSDVDQQSS[79.9663]SSR	K	L	123	154	32	3	29S(79.9663)	sp|Q9UH99-3|SUN2_HUMAN	Q9UH99-3	SUN2_HUMAN	SUN2	Isoform 3 of SUN domain-containing protein 2		sp|Q9UH99|SUN2_HUMAN	1	0	MS/MS	STY:79.9663@AT(0.0638)EDFLGS(0.0638)S(0.0638)S(0.0838)GY(0.0838)S(0.0838)S(0.0838)EDDY(0.0838)VGY(0.0427)S(0.0427)DVDQQS(0.0022)S(0.1007)S(0.1007)S(0.1007)R;
ATEDGEEDEVSAGEK	ATEDGEEDEVS[79.9663]AGEK	K	E	1425	1439	15	2	11S(79.9663)	sp|Q9BXW9|FACD2_HUMAN	Q9BXW9	FACD2_HUMAN	FANCD2	Fanconi anemia group D2 protein			5	2.33428512E8	MS/MS	STY:79.9663@AT(0.0532)EDGEEDEVS(0.9468)AGEK;
ATGEEEGMDIQKSENEDDSEWEDVDDEK	ATGEEEGMDIQKS[79.9663]ENEDDS[79.9663]EWEDVDDEK	K	G	170	197	28	3	13S(79.9663),19S(79.9663)	sp|Q96GA3|LTV1_HUMAN	Q96GA3	LTV1_HUMAN	LTV1	Protein LTV1 homolog			2	1.10919616E8	MS/MS	STY:79.9663@AT(0.2294)GEEEGMDIQKS(0.8858)ENEDDS(0.8848)EWEDVDDEK;
ATGEEEGMDIQKSENEDDSEWEDVDDEK	ATGEEEGM[15.9949]DIQKS[79.9663]ENEDDS[79.9663]EWEDVDDEK	K	G	170	197	28	3	13S(79.9663),19S(79.9663),8M(15.9949)	sp|Q96GA3|LTV1_HUMAN	Q96GA3	LTV1_HUMAN	LTV1	Protein LTV1 homolog			1	2.299537E7	MS/MS	M:15.9949@ATGEEEGM(1.0000)DIQKSENEDDSEWEDVDDEK;STY:79.9663@AT(0.1244)GEEEGMDIQKS(0.9378)ENEDDS(0.9378)EWEDVDDEK;
ATGGLCLLGAYADSDDDDNDVSEK	ATGGLC[57.0215]LLGAYADSDDDDNDVS[79.9663]EK	K	L	105	128	24	3	22S(79.9663),6C(57.0215)	sp|Q8N3X1-2|FNBP4_HUMAN	Q8N3X1-2	FNBP4_HUMAN	FNBP4	Isoform 2 of Formin-binding protein 4		sp|Q8N3X1|FNBP4_HUMAN	1	4.3015348E7	MS/MS	STY:79.9663@AT(0.0157)GGLCLLGAY(0.0279)ADS(0.4741)DDDDNDVS(0.4823)EK;
ATGGLCLLGAYADSDDDDNDVSEK	ATGGLC[57.0215]LLGAYADS[79.9663]DDDDNDVSEK	K	L	105	128	24	3	14S(79.9663),6C(57.0215)	sp|Q8N3X1-2|FNBP4_HUMAN	Q8N3X1-2	FNBP4_HUMAN	FNBP4	Isoform 2 of Formin-binding protein 4		sp|Q8N3X1|FNBP4_HUMAN	1	4.3015348E7	MS/MS	STY:79.9663@AT(0.1441)GGLCLLGAY(0.0185)ADS(0.8181)DDDDNDVS(0.0194)EK;
ATGGLCLLGAYADSDDDDNDVSEK	ATGGLC[57.0215]LLGAY[79.9663]ADSDDDDNDVSEK	K	L	105	128	24	3	11Y(79.9663),6C(57.0215)	sp|Q8N3X1-2|FNBP4_HUMAN	Q8N3X1-2	FNBP4_HUMAN	FNBP4	Isoform 2 of Formin-binding protein 4		sp|Q8N3X1|FNBP4_HUMAN	3	4.3015348E7	MS/MS	STY:79.9663@AT(0.0239)GGLCLLGAY(0.8107)ADS(0.0195)DDDDNDVS(0.1459)EK;
ATISDEEIER	ATIS[79.9663]DEEIER	K	Q	155	164	10	2	4S(79.9663)	sp|Q9UQN3-2|CHM2B_HUMAN	Q9UQN3-2	CHM2B_HUMAN	CHMP2B	Isoform 2 of Charged multivesicular body protein 2b		sp|Q9UQN3|CHM2B_HUMAN	1	2.457773E7	MS/MS	STY:79.9663@AT(0.0532)IS(0.9468)DEEIER;
ATLGPTPTTPPQPPDPSQPPPGPMQH	ATLGPTPTTPPQPPDPS[79.9663]QPPPGPMQH	R	-	101	126	26	3	17S(79.9663)	sp|O60927|PP1RB_HUMAN	O60927	PP1RB_HUMAN	PPP1R11	E3 ubiquitin-protein ligase PPP1R11			1	0	MS/MS	STY:79.9663@AT(0.1845)LGPT(0.1847)PT(0.1847)T(0.1847)PPQPPDPS(0.2616)QPPPGPMQH;
ATLGPTPTTPPQPPDPSQPPPGPMQH	ATLGPTPTT[79.9663]PPQPPDPSQPPPGPMQH	R	-	101	126	26	3	9T(79.9663)	sp|O60927|PP1RB_HUMAN	O60927	PP1RB_HUMAN	PPP1R11	E3 ubiquitin-protein ligase PPP1R11			1	0	MS/MS	STY:79.9663@AT(0.0298)LGPT(0.0112)PT(0.0112)T(0.6363)PPQPPDPS(0.3115)QPPPGPMQH;
ATLGPTPTTPPQPPDPSQPPPGPMQH	ATLGPT[79.9663]PTTPPQPPDPSQPPPGPMQH	R	-	101	126	26	3	6T(79.9663)	sp|O60927|PP1RB_HUMAN	O60927	PP1RB_HUMAN	PPP1R11	E3 ubiquitin-protein ligase PPP1R11			1	0	MS/MS	STY:79.9663@AT(0.0092)LGPT(0.2952)PT(0.2952)T(0.2952)PPQPPDPS(0.1052)QPPPGPMQH;
ATLLNVPDLSDSIHSANASER	ATLLNVPDLSDSIHS[79.9663]ANAS[79.9663]ER	R	D	266	286	21	3	15S(79.9663),19S(79.9663)	sp|Q07157-2|ZO1_HUMAN	Q07157-2	ZO1_HUMAN	TJP1	Isoform Short of Tight junction protein ZO-1		sp|Q07157|ZO1_HUMAN	1	9.9082752E7	MS/MS	STY:79.9663@AT(0.1779)LLNVPDLS(0.4468)DS(0.4468)IHS(0.4642)ANAS(0.4642)ER;
ATLLNVPDLSDSIHSANASER	ATLLNVPDLSDS[79.9663]IHS[79.9663]ANASER	R	D	266	286	21	3	12S(79.9663),15S(79.9663)	sp|Q07157-2|ZO1_HUMAN	Q07157-2	ZO1_HUMAN	TJP1	Isoform Short of Tight junction protein ZO-1		sp|Q07157|ZO1_HUMAN	1	9.9082752E7	MS/MS	STY:79.9663@AT(0.0894)LLNVPDLS(0.4141)DS(0.7187)IHS(0.7463)ANAS(0.0314)ER;
ATLLNVPDLSDSIHSANASER	ATLLNVPDLS[79.9663]DS[79.9663]IHSANASER	R	D	266	286	21	3	10S(79.9663),12S(79.9663)	sp|Q07157-2|ZO1_HUMAN	Q07157-2	ZO1_HUMAN	TJP1	Isoform Short of Tight junction protein ZO-1		sp|Q07157|ZO1_HUMAN	1	9.9082752E7	MS/MS	STY:79.9663@AT(0.0229)LLNVPDLS(0.5165)DS(0.5165)IHS(0.4720)ANAS(0.4720)ER;
ATLSSTSGLDLMSESGEGEISPQR	ATLSSTSGLDLMSESGEGEIS[79.9663]PQR	K	E	1006	1029	24	3	21S(79.9663)	sp|Q8WWI1-2|LMO7_HUMAN	Q8WWI1-2	LMO7_HUMAN	LMO7	Isoform 2 of LIM domain only protein 7		sp|Q8WWI1-3|LMO7_HUMAN, sp|Q8WWI1-4|LMO7_HUMAN, sp|Q8WWI1-5|LMO7_HUMAN, sp|Q8WWI1|LMO7_HUMAN	2	4.6870296E7	MS/MS	STY:79.9663@AT(0.0322)LS(0.0322)S(0.0322)T(0.0322)S(0.0322)GLDLMS(0.0070)ES(0.0070)GEGEIS(0.8248)PQR;
ATMAQNENVVVQPVVAENIPVIPLSDSPPPSR	ATMAQNENVVVQPVVAENIPVIPLS[79.9663]DSPPPSR	R	W	587	618	32	3	25S(79.9663)	sp|P30414|NKTR_HUMAN	P30414	NKTR_HUMAN	NKTR	NK-tumor recognition protein			1	0	MS/MS	STY:79.9663@AT(0.1707)MAQNENVVVQPVVAENIPVIPLS(0.5793)DS(0.0145)PPPS(0.2356)R;
ATNESEDEIPQLVPIGK	ATNES[79.9663]EDEIPQLVPIGK	K	K	357	373	17	2,3	5S(79.9663)	sp|O76021|RL1D1_HUMAN	O76021	RL1D1_HUMAN	RSL1D1	Ribosomal L1 domain-containing protein 1		sp|O76021-2|RL1D1_HUMAN	6	1.18366733E9	MS/MS	STY:79.9663@AT(0.0610)NES(0.9390)EDEIPQLVPIGK;
ATPDSLEPAGPSSPASVTVTVGDEGADTPVGATPLIGDESENLEGDGDLR	ATPDS[79.9663]LEPAGPSSPASVTVTVGDEGADTPVGATPLIGDESENLEGDGDLR	K	G	54	103	50	4	5S(79.9663)	sp|Q96KQ7-2|EHMT2_HUMAN	Q96KQ7-2	EHMT2_HUMAN	EHMT2	Isoform 2 of Histone-lysine N-methyltransferase EHMT2		sp|Q96KQ7-3|EHMT2_HUMAN, sp|Q96KQ7|EHMT2_HUMAN	1	0	MS/MS	STY:79.9663@AT(0.0027)PDS(0.2110)LEPAGPS(0.1833)S(0.1833)PAS(0.0308)VT(0.0124)VT(0.0986)VGDEGADT(0.0563)PVGAT(0.0945)PLIGDES(0.1270)ENLEGDGDLR;
ATSEVPGSQASPNPVPGDGLHR	ATSEVPGS[79.9663]QASPNPVPGDGLHR	R	A	418	439	22	3	8S(79.9663)	sp|Q96GM8|TOE1_HUMAN	Q96GM8	TOE1_HUMAN	TOE1	Target of EGR1 protein 1		sp|Q96GM8-2|TOE1_HUMAN	1	9788501	MS/MS	STY:79.9663@AT(0.0477)S(0.0477)EVPGS(0.5946)QAS(0.3099)PNPVPGDGLHR;
ATSNVFAMFDQSQIQEFK	ATSNVFAMFDQS[79.9663]QIQEFK	R	E	18	35	18	2	12S(79.9663)	sp|O14950|ML12B_HUMAN	O14950	ML12B_HUMAN	MYL12B	Myosin regulatory light chain 12B	MYL12A, MYL9	sp|P19105|ML12A_HUMAN, sp|P24844-2|MYL9_HUMAN, sp|P24844|MYL9_HUMAN	2	0	MS/MS	STY:79.9663@AT(0.0356)S(0.0356)NVFAMFDQS(0.9288)QIQEFK;
ATSPSSSVSGDFDDGHHSVSTPGPSR	ATSPSSSVSGDFDDGHHS[79.9663]VSTPGPSR	R	K	8	33	26	4	18S(79.9663)	sp|Q86U86-2|PB1_HUMAN	Q86U86-2	PB1_HUMAN	PBRM1	Isoform 2 of Protein polybromo-1		sp|Q86U86-3|PB1_HUMAN, sp|Q86U86-4|PB1_HUMAN, sp|Q86U86-5|PB1_HUMAN, sp|Q86U86-6|PB1_HUMAN, sp|Q86U86-7|PB1_HUMAN, sp|Q86U86-8|PB1_HUMAN, sp|Q86U86-9|PB1_HUMAN, sp|Q86U86|PB1_HUMAN	1	0	MS/MS	STY:79.9663@AT(0.0337)S(0.0337)PS(0.0085)S(0.0085)S(0.0085)VS(0.0085)GDFDDGHHS(0.8648)VS(0.0112)T(0.0112)PGPS(0.0112)R;
ATSPSSSVSGDFDDGHHSVSTPGPSR	ATSPSSSVSGDFDDGHHS[79.9663]VS[79.9663]TPGPSR	R	K	8	33	26	3	18S(79.9663),20S(79.9663)	sp|Q86U86-2|PB1_HUMAN	Q86U86-2	PB1_HUMAN	PBRM1	Isoform 2 of Protein polybromo-1		sp|Q86U86-3|PB1_HUMAN, sp|Q86U86-4|PB1_HUMAN, sp|Q86U86-5|PB1_HUMAN, sp|Q86U86-6|PB1_HUMAN, sp|Q86U86-7|PB1_HUMAN, sp|Q86U86-8|PB1_HUMAN, sp|Q86U86-9|PB1_HUMAN, sp|Q86U86|PB1_HUMAN	1	2.5490952E7	MS/MS	STY:79.9663@AT(0.1884)S(0.1884)PS(0.1884)S(0.1884)S(0.1884)VS(0.1547)GDFDDGHHS(0.2978)VS(0.2978)T(0.2978)PGPS(0.0097)R;
ATSPSSSVSGDFDDGHHSVSTPGPSR	ATSPSSSVS[79.9663]GDFDDGHHSVSTPGPSR	R	K	8	33	26	3	9S(79.9663)	sp|Q86U86-2|PB1_HUMAN	Q86U86-2	PB1_HUMAN	PBRM1	Isoform 2 of Protein polybromo-1		sp|Q86U86-3|PB1_HUMAN, sp|Q86U86-4|PB1_HUMAN, sp|Q86U86-5|PB1_HUMAN, sp|Q86U86-6|PB1_HUMAN, sp|Q86U86-7|PB1_HUMAN, sp|Q86U86-8|PB1_HUMAN, sp|Q86U86-9|PB1_HUMAN, sp|Q86U86|PB1_HUMAN	1	1.33414328E8	MS/MS	STY:79.9663@AT(0.0141)S(0.0141)PS(0.0141)S(0.0141)S(0.0141)VS(0.9026)GDFDDGHHS(0.0068)VS(0.0068)T(0.0066)PGPS(0.0066)R;
ATSPSSSVSGDFDDGHHSVSTPGPSR	ATSPSS[79.9663]SVSGDFDDGHHSVSTPGPSR	R	K	8	33	26	3	6S(79.9663)	sp|Q86U86-2|PB1_HUMAN	Q86U86-2	PB1_HUMAN	PBRM1	Isoform 2 of Protein polybromo-1		sp|Q86U86-3|PB1_HUMAN, sp|Q86U86-4|PB1_HUMAN, sp|Q86U86-5|PB1_HUMAN, sp|Q86U86-6|PB1_HUMAN, sp|Q86U86-7|PB1_HUMAN, sp|Q86U86-8|PB1_HUMAN, sp|Q86U86-9|PB1_HUMAN, sp|Q86U86|PB1_HUMAN	2	9.4548984E7	MS/MS	STY:79.9663@AT(0.0074)S(0.0074)PS(0.0074)S(0.9199)S(0.0062)VS(0.0062)GDFDDGHHS(0.0114)VS(0.0114)T(0.0114)PGPS(0.0113)R;
ATSPSSSVSGDFDDGHHSVSTPGPSR	ATSPS[79.9663]SSVSGDFDDGHHSVSTPGPSR	R	K	8	33	26	3	5S(79.9663)	sp|Q86U86-2|PB1_HUMAN	Q86U86-2	PB1_HUMAN	PBRM1	Isoform 2 of Protein polybromo-1		sp|Q86U86-3|PB1_HUMAN, sp|Q86U86-4|PB1_HUMAN, sp|Q86U86-5|PB1_HUMAN, sp|Q86U86-6|PB1_HUMAN, sp|Q86U86-7|PB1_HUMAN, sp|Q86U86-8|PB1_HUMAN, sp|Q86U86-9|PB1_HUMAN, sp|Q86U86|PB1_HUMAN	3	2.26865472E8	MS/MS	STY:79.9663@AT(0.0073)S(0.0073)PS(0.4701)S(0.4701)S(0.0063)VS(0.0063)GDFDDGHHS(0.0062)VS(0.0088)T(0.0088)PGPS(0.0088)R;
ATSPSSSVSGDFDDGHHSVSTPGPSR	ATSPS[79.9663]SSVSGDFDDGHHSVSTPGPS[79.9663]R	R	K	8	33	26	3	25S(79.9663),5S(79.9663)	sp|Q86U86-2|PB1_HUMAN	Q86U86-2	PB1_HUMAN	PBRM1	Isoform 2 of Protein polybromo-1		sp|Q86U86-3|PB1_HUMAN, sp|Q86U86-4|PB1_HUMAN, sp|Q86U86-5|PB1_HUMAN, sp|Q86U86-6|PB1_HUMAN, sp|Q86U86-7|PB1_HUMAN, sp|Q86U86-8|PB1_HUMAN, sp|Q86U86-9|PB1_HUMAN, sp|Q86U86|PB1_HUMAN	1	0	MS/MS	STY:79.9663@AT(0.0068)S(0.0068)PS(0.2766)S(0.2766)S(0.2766)VS(0.2766)GDFDDGHHS(0.1652)VS(0.1652)T(0.1652)PGPS(0.3843)R;
ATSPSSSVSGDFDDGHHSVSTPGPSR	ATSPS[79.9663]SS[79.9663]VSGDFDDGHHSVSTPGPSR	R	K	8	33	26	3	5S(79.9663),7S(79.9663)	sp|Q86U86-2|PB1_HUMAN	Q86U86-2	PB1_HUMAN	PBRM1	Isoform 2 of Protein polybromo-1		sp|Q86U86-3|PB1_HUMAN, sp|Q86U86-4|PB1_HUMAN, sp|Q86U86-5|PB1_HUMAN, sp|Q86U86-6|PB1_HUMAN, sp|Q86U86-7|PB1_HUMAN, sp|Q86U86-8|PB1_HUMAN, sp|Q86U86-9|PB1_HUMAN, sp|Q86U86|PB1_HUMAN	1	0	MS/MS	STY:79.9663@AT(0.2916)S(0.2916)PS(0.4040)S(0.4040)S(0.4822)VS(0.0085)GDFDDGHHS(0.0267)VS(0.0267)T(0.0264)PGPS(0.0383)R;
ATSPSSSVSGDFDDGHHSVSTPGPSR	ATSPS[79.9663]S[79.9663]SVSGDFDDGHHSVSTPGPSR	R	K	8	33	26	3	5S(79.9663),6S(79.9663)	sp|Q86U86-2|PB1_HUMAN	Q86U86-2	PB1_HUMAN	PBRM1	Isoform 2 of Protein polybromo-1		sp|Q86U86-3|PB1_HUMAN, sp|Q86U86-4|PB1_HUMAN, sp|Q86U86-5|PB1_HUMAN, sp|Q86U86-6|PB1_HUMAN, sp|Q86U86-7|PB1_HUMAN, sp|Q86U86-8|PB1_HUMAN, sp|Q86U86-9|PB1_HUMAN, sp|Q86U86|PB1_HUMAN	1	1.20817648E8	MS/MS	STY:79.9663@AT(0.3398)S(0.3398)PS(0.3689)S(0.3689)S(0.3689)VS(0.0339)GDFDDGHHS(0.0437)VS(0.0462)T(0.0462)PGPS(0.0436)R;
ATSSSNPSSPAPDWYK	ATSSSNPSS[79.9663]PAPDWY[79.9663]K	K	D	1950	1965	16	2	15Y(79.9663),9S(79.9663)	sp|P46100-4|ATRX_HUMAN	P46100-4	ATRX_HUMAN	ATRX	Isoform 3 of Transcriptional regulator ATRX		sp|P46100-2|ATRX_HUMAN, sp|P46100-3|ATRX_HUMAN, sp|P46100-5|ATRX_HUMAN, sp|P46100|ATRX_HUMAN	1	0	MS/MS	STY:79.9663@AT(0.2377)S(0.2377)S(0.2799)S(0.2799)NPS(0.2799)S(0.3333)PAPDWY(0.3518)K;
ATSSSNPSSPAPDWYK	ATSSSNPS[79.9663]S[79.9663]PAPDWYK	K	D	1950	1965	16	2	8S(79.9663),9S(79.9663)	sp|P46100-4|ATRX_HUMAN	P46100-4	ATRX_HUMAN	ATRX	Isoform 3 of Transcriptional regulator ATRX		sp|P46100-2|ATRX_HUMAN, sp|P46100-3|ATRX_HUMAN, sp|P46100-5|ATRX_HUMAN, sp|P46100|ATRX_HUMAN	1	0	MS/MS	STY:79.9663@AT(0.0249)S(0.0249)S(0.0249)S(0.0249)NPS(0.9381)S(0.9381)PAPDWY(0.0242)K;
ATSSTQSLAR	ATS[79.9663]STQSLAR	R	L	1836	1845	10	2	3S(79.9663)	sp|Q14980-2|NUMA1_HUMAN	Q14980-2	NUMA1_HUMAN	NUMA1	Isoform 2 of Nuclear mitotic apparatus protein 1		sp|Q14980-5|NUMA1_HUMAN, sp|Q14980|NUMA1_HUMAN	1	0	MS/MS	STY:79.9663@AT(0.0123)S(0.7191)S(0.0290)T(0.2013)QS(0.0382)LAR;
ATVTPSPVK	ATVTPS[79.9663]PVK	K	G	176	184	9	2	6S(79.9663)	sp|Q9H1E3|NUCKS_HUMAN	Q9H1E3	NUCKS_HUMAN	NUCKS1	Nuclear ubiquitous casein and cyclin-dependent kinase substrate 1		sp|Q9H1E3-2|NUCKS_HUMAN	5	7.3629197E8	MS/MS	STY:79.9663@AT(0.0279)VT(0.0273)PS(0.9448)PVK;
ATVTPSPVK	ATVT[79.9663]PSPVK	K	G	176	184	9	2	4T(79.9663)	sp|Q9H1E3|NUCKS_HUMAN	Q9H1E3	NUCKS_HUMAN	NUCKS1	Nuclear ubiquitous casein and cyclin-dependent kinase substrate 1		sp|Q9H1E3-2|NUCKS_HUMAN	1	6.4044358E8	MS/MS	STY:79.9663@AT(0.0172)VT(0.4914)PS(0.4914)PVK;
ATVTPSPVK	ATVT[79.9663]PS[79.9663]PVK	K	G	176	184	9	2	4T(79.9663),6S(79.9663)	sp|Q9H1E3|NUCKS_HUMAN	Q9H1E3	NUCKS_HUMAN	NUCKS1	Nuclear ubiquitous casein and cyclin-dependent kinase substrate 1		sp|Q9H1E3-2|NUCKS_HUMAN	4	8.075815E8	MS/MS	STY:79.9663@AT(0.1006)VT(0.9497)PS(0.9497)PVK;
ATAPQTQHVSPMR	AT[79.9663]APQTQHVSPM[15.9949]R	R	Q	124	136	13	2,3	12M(15.9949),2T(79.9663)	sp|P29692|EF1D_HUMAN	P29692	EF1D_HUMAN	EEF1D	Elongation factor 1-delta		sp|P29692-2|EF1D_HUMAN, sp|P29692-3|EF1D_HUMAN, sp|P29692-4|EF1D_HUMAN	5	0	MS/MS	M:15.9949@ATAPQTQHVSPM(1.0000)R;STY:79.9663@AT(0.9085)APQT(0.0526)QHVS(0.0389)PMR;
ATAQPPAPLSPDSGSPSPDSGSASPVEEEDVGSSEK	AT[79.9663]AQPPAPLSPDSGSPSPDSGSAS[79.9663]PVEEEDVGSSEK	R	L	15	50	36	3	24S(79.9663),2T(79.9663)	sp|O95361|TRI16_HUMAN	O95361	TRI16_HUMAN	TRIM16	Tripartite motif-containing protein 16			1	0	MS/MS	STY:79.9663@AT(0.8477)AQPPAPLS(0.0195)PDS(0.0807)GS(0.0807)PS(0.0177)PDS(0.0439)GS(0.0439)AS(0.8384)PVEEEDVGS(0.0137)S(0.0137)EK;
ATAQPPAPLSPDSGSPSPDSGSASPVEEEDVGSSEK	AT[79.9663]AQPPAPLSPDSGSPSPDSGS[79.9663]AS[79.9663]PVEEEDVGSSEK	R	L	15	50	36	4	22S(79.9663),24S(79.9663),2T(79.9663)	sp|O95361|TRI16_HUMAN	O95361	TRI16_HUMAN	TRIM16	Tripartite motif-containing protein 16			1	1.92549e+06	MS/MS	STY:79.9663@AT(0.3943)AQPPAPLS(0.3121)PDS(0.3121)GS(0.3121)PS(0.0624)PDS(0.2377)GS(0.3424)AS(0.3424)PVEEEDVGS(0.3424)S(0.3424)EK;
ATAQPPAPLSPDSGSPSPDSGSASPVEEEDVGSSEK	AT[79.9663]AQPPAPLSPDSGSPS[79.9663]PDS[79.9663]GSASPVEEEDVGSSEK	R	L	15	50	36	3	17S(79.9663),20S(79.9663),2T(79.9663)	sp|O95361|TRI16_HUMAN	O95361	TRI16_HUMAN	TRIM16	Tripartite motif-containing protein 16			1	0	MS/MS	STY:79.9663@AT(0.3947)AQPPAPLS(0.2872)PDS(0.2872)GS(0.0344)PS(0.3538)PDS(0.3538)GS(0.3538)AS(0.2272)PVEEEDVGS(0.3538)S(0.3538)EK;
ATAQPPAPLSPDSGSPSPDSGSASPVEEEDVGSSEK	AT[79.9663]AQPPAPLSPDSGS[79.9663]PSPDSGSASPVEEEDVGSSEK	R	L	15	50	36	3	15S(79.9663),2T(79.9663)	sp|O95361|TRI16_HUMAN	O95361	TRI16_HUMAN	TRIM16	Tripartite motif-containing protein 16			1	0	MS/MS	STY:79.9663@AT(0.8614)AQPPAPLS(0.1333)PDS(0.0187)GS(0.8984)PS(0.0169)PDS(0.0145)GS(0.0139)AS(0.0136)PVEEEDVGS(0.0146)S(0.0146)EK;
ATAQPPAPLSPDSGSPSPDSGSASPVEEEDVGSSEK	AT[79.9663]AQPPAPLSPDS[79.9663]GSPSPDSGSASPVEEEDVGSSEK	R	L	15	50	36	3	13S(79.9663),2T(79.9663)	sp|O95361|TRI16_HUMAN	O95361	TRI16_HUMAN	TRIM16	Tripartite motif-containing protein 16			1	0	MS/MS	STY:79.9663@AT(0.8389)AQPPAPLS(0.0154)PDS(0.8147)GS(0.0158)PS(0.0604)PDS(0.0604)GS(0.0604)AS(0.1075)PVEEEDVGS(0.0133)S(0.0133)EK;
ATAQPPAPLSPDSGSPSPDSGSASPVEEEDVGSSEK	AT[79.9663]AQPPAPLSPDS[79.9663]GSPSPDSGS[79.9663]ASPVEEEDVGSSEK	R	L	15	50	36	3	13S(79.9663),22S(79.9663),2T(79.9663)	sp|O95361|TRI16_HUMAN	O95361	TRI16_HUMAN	TRIM16	Tripartite motif-containing protein 16			1	0	MS/MS	STY:79.9663@AT(0.7488)AQPPAPLS(0.0259)PDS(0.7384)GS(0.1666)PS(0.1666)PDS(0.1004)GS(0.7141)AS(0.2889)PVEEEDVGS(0.0252)S(0.0252)EK;
ATAQPPAPLSPDSGSPSPDSGSASPVEEEDVGSSEK	AT[79.9663]AQPPAPLS[79.9663]PDSGSPSPDSGSASPVEEEDVGSSEK	R	L	15	50	36	3	10S(79.9663),2T(79.9663)	sp|O95361|TRI16_HUMAN	O95361	TRI16_HUMAN	TRIM16	Tripartite motif-containing protein 16			5	4.97387648E8	MS/MS	STY:79.9663@AT(0.7971)AQPPAPLS(0.7957)PDS(0.0483)GS(0.0483)PS(0.0708)PDS(0.0614)GS(0.0677)AS(0.0372)PVEEEDVGS(0.0367)S(0.0367)EK;
ATAQPPAPLSPDSGSPSPDSGSASPVEEEDVGSSEK	AT[79.9663]AQPPAPLS[79.9663]PDSGSPSPDSGSASPVEEEDVGS[79.9663]SEK	R	L	15	50	36	3	10S(79.9663),2T(79.9663),33S(79.9663)	sp|O95361|TRI16_HUMAN	O95361	TRI16_HUMAN	TRIM16	Tripartite motif-containing protein 16			1	0	MS/MS	STY:79.9663@AT(0.6270)AQPPAPLS(0.5062)PDS(0.5062)GS(0.5062)PS(0.0306)PDS(0.0323)GS(0.0258)AS(0.0258)PVEEEDVGS(0.6201)S(0.1200)EK;
ATAQPPAPLSPDSGSPSPDSGSASPVEEEDVGSSEK	AT[79.9663]AQPPAPLS[79.9663]PDSGSPSPDSGSAS[79.9663]PVEEEDVGSSEK	R	L	15	50	36	3,4	10S(79.9663),24S(79.9663),2T(79.9663)	sp|O95361|TRI16_HUMAN	O95361	TRI16_HUMAN	TRIM16	Tripartite motif-containing protein 16			2	2.01436e+06	MS/MS	STY:79.9663@AT(0.5163)AQPPAPLS(0.5163)PDS(0.3067)GS(0.3376)PS(0.4231)PDS(0.1440)GS(0.1440)AS(0.5808)PVEEEDVGS(0.0156)S(0.0156)EK;
ATAQPPAPLSPDSGSPSPDSGSASPVEEEDVGSSEK	AT[79.9663]AQPPAPLS[79.9663]PDSGSPSPDS[79.9663]GSASPVEEEDVGSSEK	R	L	15	50	36	3	10S(79.9663),20S(79.9663),2T(79.9663)	sp|O95361|TRI16_HUMAN	O95361	TRI16_HUMAN	TRIM16	Tripartite motif-containing protein 16			1	1.0839008E8	MS/MS	STY:79.9663@AT(0.7644)AQPPAPLS(0.7644)PDS(0.1074)GS(0.1074)PS(0.2118)PDS(0.7517)GS(0.0216)AS(0.2068)PVEEEDVGS(0.0323)S(0.0323)EK;
ATAQPPAPLSPDSGSPSPDSGSASPVEEEDVGSSEK	AT[79.9663]AQPPAPLS[79.9663]PDS[79.9663]GSPSPDSGSASPVEEEDVGSSEK	R	L	15	50	36	3	10S(79.9663),13S(79.9663),2T(79.9663)	sp|O95361|TRI16_HUMAN	O95361	TRI16_HUMAN	TRIM16	Tripartite motif-containing protein 16			2	0	MS/MS	STY:79.9663@AT(0.8600)AQPPAPLS(0.8818)PDS(0.8805)GS(0.0317)PS(0.0281)PDS(0.0426)GS(0.0426)AS(0.0779)PVEEEDVGS(0.0775)S(0.0775)EK;
ATDSDLSSPR	AT[79.9663]DS[79.9663]DLS[79.9663]SPR	K	H	351	360	10	2	2T(79.9663),4S(79.9663),7S(79.9663)	sp|Q9BRD0|BUD13_HUMAN	Q9BRD0	BUD13_HUMAN	BUD13	BUD13 homolog		sp|Q9BRD0-2|BUD13_HUMAN	1	1.2513696E7	MS/MS	STY:79.9663@AT(0.7630)DS(0.7630)DLS(0.7370)S(0.7370)PR;
ATGDGSSPELPSLER	AT[79.9663]GDGS[79.9663]SPELPSLER	R	K	248	262	15	2	2T(79.9663),6S(79.9663)	sp|Q9H2Y7-2|ZN106_HUMAN	Q9H2Y7-2	ZN106_HUMAN	ZNF106	Isoform 2 of Zinc finger protein 106		sp|Q9H2Y7|ZN106_HUMAN	3	7.9671088E7	MS/MS	STY:79.9663@AT(0.9325)GDGS(0.9325)S(0.0802)PELPS(0.0548)LER;
ATGEEEGMDIQKSENEDDSEWEDVDDEK	AT[79.9663]GEEEGMDIQKSENEDDSEWEDVDDEK	K	G	170	197	28	3	2T(79.9663)	sp|Q96GA3|LTV1_HUMAN	Q96GA3	LTV1_HUMAN	LTV1	Protein LTV1 homolog			1	1.450041E7	MS/MS	STY:79.9663@AT(0.3753)GEEEGMDIQKS(0.3691)ENEDDS(0.2556)EWEDVDDEK;
ATGEEEGMDIQKSENEDDSEWEDVDDEK	AT[79.9663]GEEEGMDIQKS[79.9663]ENEDDSEWEDVDDEK	K	G	170	197	28	3	13S(79.9663),2T(79.9663)	sp|Q96GA3|LTV1_HUMAN	Q96GA3	LTV1_HUMAN	LTV1	Protein LTV1 homolog			1	0	MS/MS	STY:79.9663@AT(0.8873)GEEEGMDIQKS(0.8862)ENEDDS(0.2265)EWEDVDDEK;
ATISDEEIER	AT[79.9663]ISDEEIER	K	Q	155	164	10	2	2T(79.9663)	sp|Q9UQN3-2|CHM2B_HUMAN	Q9UQN3-2	CHM2B_HUMAN	CHMP2B	Isoform 2 of Charged multivesicular body protein 2b		sp|Q9UQN3|CHM2B_HUMAN	1	2.457773E7	MS/MS	STY:79.9663@AT(0.9427)IS(0.0573)DEEIER;
ATLLNVPDLSDSIHSANASER	AT[79.9663]LLNVPDLSDSIHS[79.9663]ANASER	R	D	266	286	21	3	15S(79.9663),2T(79.9663)	sp|Q07157-2|ZO1_HUMAN	Q07157-2	ZO1_HUMAN	TJP1	Isoform Short of Tight junction protein ZO-1		sp|Q07157|ZO1_HUMAN	1	9.9234048E7	MS/MS	STY:79.9663@AT(0.6058)LLNVPDLS(0.3564)DS(0.3564)IHS(0.6283)ANAS(0.0531)ER;
ATNESEDEIPQLVPIGK	AT[79.9663]NESEDEIPQLVPIGK	K	K	357	373	17	2,3	2T(79.9663)	sp|O76021|RL1D1_HUMAN	O76021	RL1D1_HUMAN	RSL1D1	Ribosomal L1 domain-containing protein 1		sp|O76021-2|RL1D1_HUMAN	11	1.18366733E9	MS/MS	STY:79.9663@AT(0.9353)NES(0.0647)EDEIPQLVPIGK;
ATPAQTPR	AT[79.9663]PAQTPR	R	S	18	25	8	2	2T(79.9663)	sp|P33991|MCM4_HUMAN	P33991	MCM4_HUMAN	MCM4	DNA replication licensing factor MCM4			1	4574072	MS/MS	STY:79.9663@AT(0.5000)PAQT(0.5000)PR;
ATQQQHDFTLTQTADGR	AT[79.9663]QQQHDFTLTQTADGR	R	S	2637	2653	17	3	2T(79.9663)	sp|P78527-2|PRKDC_HUMAN	P78527-2	PRKDC_HUMAN	PRKDC	Isoform 2 of DNA-dependent protein kinase catalytic subunit		sp|P78527|PRKDC_HUMAN	1	5621138	MS/MS	STY:79.9663@AT(0.5479)QQQHDFT(0.2809)LT(0.1219)QT(0.0493)ADGR;
ATSPSSSVSGDFDDGHHSVSTPGPSR	AT[79.9663]SPSSSVSGDFDDGHHSVSTPGPSR	R	K	8	33	26	3,4	2T(79.9663)	sp|Q86U86-2|PB1_HUMAN	Q86U86-2	PB1_HUMAN	PBRM1	Isoform 2 of Protein polybromo-1		sp|Q86U86-3|PB1_HUMAN, sp|Q86U86-4|PB1_HUMAN, sp|Q86U86-5|PB1_HUMAN, sp|Q86U86-6|PB1_HUMAN, sp|Q86U86-7|PB1_HUMAN, sp|Q86U86-8|PB1_HUMAN, sp|Q86U86-9|PB1_HUMAN, sp|Q86U86|PB1_HUMAN	7	2.26113856E8	MS/MS	STY:79.9663@AT(0.9337)S(0.0065)PS(0.0063)S(0.0062)S(0.0062)VS(0.0062)GDFDDGHHS(0.0072)VS(0.0072)T(0.0102)PGPS(0.0102)R;
ATSPSSSVSGDFDDGHHSVSTPGPSR	AT[79.9663]SPS[79.9663]SSVSGDFDDGHHSVSTPGPSR	R	K	8	33	26	4	2T(79.9663),5S(79.9663)	sp|Q86U86-2|PB1_HUMAN	Q86U86-2	PB1_HUMAN	PBRM1	Isoform 2 of Protein polybromo-1		sp|Q86U86-3|PB1_HUMAN, sp|Q86U86-4|PB1_HUMAN, sp|Q86U86-5|PB1_HUMAN, sp|Q86U86-6|PB1_HUMAN, sp|Q86U86-7|PB1_HUMAN, sp|Q86U86-8|PB1_HUMAN, sp|Q86U86-9|PB1_HUMAN, sp|Q86U86|PB1_HUMAN	1	8851635	MS/MS	STY:79.9663@AT(0.3053)S(0.3053)PS(0.4346)S(0.0072)S(0.0070)VS(0.0519)GDFDDGHHS(0.2292)VS(0.2292)T(0.2292)PGPS(0.2011)R;
ATSSSNPSSPAPDWYK	AT[79.9663]SSSNPSSPAPDWY[79.9663]K	K	D	1950	1965	16	2	15Y(79.9663),2T(79.9663)	sp|P46100-4|ATRX_HUMAN	P46100-4	ATRX_HUMAN	ATRX	Isoform 3 of Transcriptional regulator ATRX		sp|P46100-2|ATRX_HUMAN, sp|P46100-3|ATRX_HUMAN, sp|P46100-5|ATRX_HUMAN, sp|P46100|ATRX_HUMAN	1	2.70207168E8	MS/MS	STY:79.9663@AT(0.3752)S(0.3752)S(0.3752)S(0.3752)NPS(0.0115)S(0.0115)PAPDWY(0.4762)K;
ATSPSSSVSGDFDDGHHSVSTPGPSR	AT[79.9663]S[79.9663]PSSSVSGDFDDGHHSVSTPGPSR	R	K	8	33	26	3	2T(79.9663),3S(79.9663)	sp|Q86U86-2|PB1_HUMAN	Q86U86-2	PB1_HUMAN	PBRM1	Isoform 2 of Protein polybromo-1		sp|Q86U86-3|PB1_HUMAN, sp|Q86U86-4|PB1_HUMAN, sp|Q86U86-5|PB1_HUMAN, sp|Q86U86-6|PB1_HUMAN, sp|Q86U86-7|PB1_HUMAN, sp|Q86U86-8|PB1_HUMAN, sp|Q86U86-9|PB1_HUMAN, sp|Q86U86|PB1_HUMAN	2	1.46032992E8	MS/MS	STY:79.9663@AT(0.3676)S(0.3676)PS(0.0101)S(0.3676)S(0.3676)VS(0.3676)GDFDDGHHS(0.0439)VS(0.0360)T(0.0360)PGPS(0.0360)R;
ATSPSSSVSGDFDDGHHSVSTPGPSR	AT[79.9663]S[79.9663]PS[79.9663]SSVSGDFDDGHHSVSTPGPSR	R	K	8	33	26	3	2T(79.9663),3S(79.9663),5S(79.9663)	sp|Q86U86-2|PB1_HUMAN	Q86U86-2	PB1_HUMAN	PBRM1	Isoform 2 of Protein polybromo-1		sp|Q86U86-3|PB1_HUMAN, sp|Q86U86-4|PB1_HUMAN, sp|Q86U86-5|PB1_HUMAN, sp|Q86U86-6|PB1_HUMAN, sp|Q86U86-7|PB1_HUMAN, sp|Q86U86-8|PB1_HUMAN, sp|Q86U86-9|PB1_HUMAN, sp|Q86U86|PB1_HUMAN	1	0	MS/MS	STY:79.9663@AT(0.3306)S(0.3306)PS(0.3306)S(0.3306)S(0.3306)VS(0.0250)GDFDDGHHS(0.3306)VS(0.3306)T(0.3306)PGPS(0.3306)R;
ATSSSNPSSPAPDWYK	AT[79.9663]S[79.9663]SSNPSSPAPDWYK	K	D	1950	1965	16	2	2T(79.9663),3S(79.9663)	sp|P46100-4|ATRX_HUMAN	P46100-4	ATRX_HUMAN	ATRX	Isoform 3 of Transcriptional regulator ATRX		sp|P46100-2|ATRX_HUMAN, sp|P46100-3|ATRX_HUMAN, sp|P46100-5|ATRX_HUMAN, sp|P46100|ATRX_HUMAN	2	2.70207168E8	MS/MS	STY:79.9663@AT(0.4210)S(0.4210)S(0.4210)S(0.4210)NPS(0.0162)S(0.1498)PAPDWY(0.1498)K;
ATTPPNQGRPDSPVYANLQELK	AT[79.9663]TPPNQGRPDSPVY[79.9663]ANLQELK	R	I	229	250	22	3	15Y(79.9663),2T(79.9663)	sp|Q8IWW6-2|RHG12_HUMAN	Q8IWW6-2	RHG12_HUMAN	ARHGAP12	Isoform 2 of Rho GTPase-activating protein 12		sp|Q8IWW6-3|RHG12_HUMAN, sp|Q8IWW6-4|RHG12_HUMAN, sp|Q8IWW6|RHG12_HUMAN	1	8.7636784E7	MS/MS	STY:79.9663@AT(0.7020)T(0.0481)PPNQGRPDS(0.5887)PVY(0.6612)ANLQELK;
ATTPPNQGRPDSPVYANLQELK	AT[79.9663]TPPNQGRPDS[79.9663]PVYANLQELK	R	I	229	250	22	3	12S(79.9663),2T(79.9663)	sp|Q8IWW6-2|RHG12_HUMAN	Q8IWW6-2	RHG12_HUMAN	ARHGAP12	Isoform 2 of Rho GTPase-activating protein 12		sp|Q8IWW6-3|RHG12_HUMAN, sp|Q8IWW6-4|RHG12_HUMAN, sp|Q8IWW6|RHG12_HUMAN	3	2.05380384E8	MS/MS	STY:79.9663@AT(0.9298)T(0.0723)PPNQGRPDS(0.9299)PVY(0.0680)ANLQELK;
ATTPQLTDVSEDLDQQSLPSEPEETLSR	AT[79.9663]TPQLTDVSEDLDQQSLPSEPEETLSR	R	D	328	355	28	3	2T(79.9663)	sp|Q8NC44|RETR2_HUMAN	Q8NC44	RETR2_HUMAN	RETREG2	Reticulophagy regulator 2			1	0	MS/MS	STY:79.9663@AT(0.4551)T(0.4551)PQLT(0.0192)DVS(0.0239)EDLDQQS(0.0144)LPS(0.0109)EPEET(0.0109)LS(0.0107)R;
ATTPASTANSDVATIPTDTPLK	AT[79.9663]T[79.9663]PASTANSDVATIPTDTPLK	K	E	260	281	22	3	2T(79.9663),3T(79.9663)	sp|O60271-2|JIP4_HUMAN	O60271-2	JIP4_HUMAN	SPAG9	Isoform 2 of C-Jun-amino-terminal kinase-interacting protein 4		sp|O60271-3|JIP4_HUMAN, sp|O60271-4|JIP4_HUMAN, sp|O60271-5|JIP4_HUMAN, sp|O60271-9|JIP4_HUMAN, sp|O60271|JIP4_HUMAN	1	3.85669e+06	MS/MS	STY:79.9663@AT(0.2723)T(0.2723)PAS(0.2723)T(0.2723)ANS(0.2723)DVAT(0.2129)IPT(0.2129)DT(0.2129)PLK;
ATTPPNQGRPDSPVYANLQELK	AT[79.9663]T[79.9663]PPNQGRPDSPVYANLQELK	R	I	229	250	22	3	2T(79.9663),3T(79.9663)	sp|Q8IWW6-2|RHG12_HUMAN	Q8IWW6-2	RHG12_HUMAN	ARHGAP12	Isoform 2 of Rho GTPase-activating protein 12		sp|Q8IWW6-3|RHG12_HUMAN, sp|Q8IWW6-4|RHG12_HUMAN, sp|Q8IWW6|RHG12_HUMAN	2	1.177436E8	MS/MS	STY:79.9663@AT(0.7485)T(0.7485)PPNQGRPDS(0.3121)PVY(0.1908)ANLQELK;
ATVTPSPVK	AT[79.9663]VTPSPVK	K	G	176	184	9	2	2T(79.9663)	sp|Q9H1E3|NUCKS_HUMAN	Q9H1E3	NUCKS_HUMAN	NUCKS1	Nuclear ubiquitous casein and cyclin-dependent kinase substrate 1		sp|Q9H1E3-2|NUCKS_HUMAN	4	6.4044358E8	MS/MS	STY:79.9663@AT(0.9446)VT(0.0277)PS(0.0277)PVK;
ATVTPSPVK	AT[79.9663]VT[79.9663]PSPVK	K	G	176	184	9	2	2T(79.9663),4T(79.9663)	sp|Q9H1E3|NUCKS_HUMAN	Q9H1E3	NUCKS_HUMAN	NUCKS1	Nuclear ubiquitous casein and cyclin-dependent kinase substrate 1		sp|Q9H1E3-2|NUCKS_HUMAN	3	1.6913958E7	MS/MS	STY:79.9663@AT(0.6896)VT(0.6552)PS(0.6552)PVK;
AVASPEATVSQTDENK	AVASPEATVSQT[79.9663]DENK	K	A	495	510	16	2	12T(79.9663)	sp|Q641Q2-2|WAC2A_HUMAN	Q641Q2-2	WAC2A_HUMAN	WASHC2A	Isoform 2 of WASH complex subunit 2A	WASHC2C	sp|Q641Q2|WAC2A_HUMAN, sp|Q9Y4E1-1|WAC2C_HUMAN, sp|Q9Y4E1-2|WAC2C_HUMAN, sp|Q9Y4E1-3|WAC2C_HUMAN, sp|Q9Y4E1-4|WAC2C_HUMAN, sp|Q9Y4E1-5|WAC2C_HUMAN, sp|Q9Y4E1-6|WAC2C_HUMAN, sp|Q9Y4E1|WAC2C_HUMAN	1	0	MS/MS	STY:79.9663@AVAS(0.1092)PEAT(0.1092)VS(0.0158)QT(0.7659)DENK;
AVASPEATVSQTDENK	AVAS[79.9663]PEATVSQTDENK	K	A	495	510	16	2	4S(79.9663)	sp|Q641Q2-2|WAC2A_HUMAN	Q641Q2-2	WAC2A_HUMAN	WASHC2A	Isoform 2 of WASH complex subunit 2A	WASHC2C	sp|Q641Q2|WAC2A_HUMAN, sp|Q9Y4E1-1|WAC2C_HUMAN, sp|Q9Y4E1-2|WAC2C_HUMAN, sp|Q9Y4E1-3|WAC2C_HUMAN, sp|Q9Y4E1-4|WAC2C_HUMAN, sp|Q9Y4E1-5|WAC2C_HUMAN, sp|Q9Y4E1-6|WAC2C_HUMAN, sp|Q9Y4E1|WAC2C_HUMAN	1	2.2350852E7	MS/MS	STY:79.9663@AVAS(0.9159)PEAT(0.0330)VS(0.0266)QT(0.0245)DENK;
AVEESSDEER	AVEES[79.9663]S[79.9663]DEER	K	Q	138	147	10	2	5S(79.9663),6S(79.9663)	sp|Q9BW71|HIRP3_HUMAN	Q9BW71	HIRP3_HUMAN	HIRIP3	HIRA-interacting protein 3			6	3.6745792E8	MS/MS	STY:79.9663@AVEES(1.0000)S(1.0000)DEER;
AVEYLLTGIPGSPEPEHGSVQESQVSEQPATEAAGENPLEFLR	AVEYLLTGIPGSPEPEHGSVQESQVS[79.9663]EQPATEAAGENPLEFLR	R	D	194	236	43	4	26S(79.9663)	sp|P54725-2|RD23A_HUMAN	P54725-2	RD23A_HUMAN	RAD23A	Isoform 2 of UV excision repair protein RAD23 homolog A		sp|P54725|RD23A_HUMAN	1	0	MS/MS	STY:79.9663@AVEY(0.0418)LLT(0.0374)GIPGS(0.0548)PEPEHGS(0.0714)VQES(0.1546)QVS(0.5009)EQPAT(0.1390)EAAGENPLEFLR;
AVEYLLTGIPGSPEPEHGSVQESQVSEQPATEAGENPLEFLR	AVEYLLTGIPGSPEPEHGSVQES[79.9663]QVSEQPATEAGENPLEFLR	R	D	194	235	42	4	23S(79.9663)	sp|P54725-3|RD23A_HUMAN	P54725-3	RD23A_HUMAN	RAD23A	Isoform 3 of UV excision repair protein RAD23 homolog A			2	7.8197912E7	MS/MS	STY:79.9663@AVEY(0.0086)LLT(0.0086)GIPGS(0.0092)PEPEHGS(0.0200)VQES(0.4714)QVS(0.4714)EQPAT(0.0108)EAGENPLEFLR;
AVEYLLTGIPGSPEPEHGSVQESQVSEQPATEAGENPLEFLR	AVEYLLTGIPGSPEPEHGS[79.9663]VQESQVSEQPATEAGENPLEFLR	R	D	194	235	42	4	19S(79.9663)	sp|P54725-3|RD23A_HUMAN	P54725-3	RD23A_HUMAN	RAD23A	Isoform 3 of UV excision repair protein RAD23 homolog A			1	7.8197912E7	MS/MS	STY:79.9663@AVEY(0.0346)LLT(0.1320)GIPGS(0.0203)PEPEHGS(0.3327)VQES(0.1272)QVS(0.1272)EQPAT(0.2261)EAGENPLEFLR;
AVEYLLTGIPGSPEPEHGSVQESQVSEQPATEAGENPLEFLR	AVEY[79.9663]LLTGIPGSPEPEHGSVQESQVSEQPATEAGENPLEFLR	R	D	194	235	42	4	4Y(79.9663)	sp|P54725-3|RD23A_HUMAN	P54725-3	RD23A_HUMAN	RAD23A	Isoform 3 of UV excision repair protein RAD23 homolog A			1	7.8197912E7	MS/MS	STY:79.9663@AVEY(0.7655)LLT(0.0169)GIPGS(0.0139)PEPEHGS(0.0419)VQES(0.0163)QVS(0.0502)EQPAT(0.0952)EAGENPLEFLR;
AVGMPSPVSPK	AVGMPS[79.9663]PVS[79.9663]PK	K	L	1050	1060	11	2	6S(79.9663),9S(79.9663)	sp|Q9UHB7|AFF4_HUMAN	Q9UHB7	AFF4_HUMAN	AFF4	AF4/FMR2 family member 4			5	5.1286132E7	MS/MS	STY:79.9663@AVGMPS(1.0000)PVS(1.0000)PK;
AVLSDSPQLSEGK	AVLS[79.9663]DSPQLSEGK	R	E	547	559	13	2	4S(79.9663)	sp|Q7Z4H7-2|HAUS6_HUMAN	Q7Z4H7-2	HAUS6_HUMAN	HAUS6	Isoform 2 of HAUS augmin-like complex subunit 6		sp|Q7Z4H7-3|HAUS6_HUMAN, sp|Q7Z4H7|HAUS6_HUMAN	1	9642548	MS/MS	STY:79.9663@AVLS(0.4912)DS(0.4912)PQLS(0.0176)EGK;
AVPMAPAPASPGSSNDSSAR	AVPMAPAPASPGSSNDS[79.9663]SAR	K	S	724	743	20	2	17S(79.9663)	sp|Q66K74-2|MAP1S_HUMAN	Q66K74-2	MAP1S_HUMAN	MAP1S	Isoform 2 of Microtubule-associated protein 1S		sp|Q66K74|MAP1S_HUMAN	1	5.1635424E7	MS/MS	STY:79.9663@AVPMAPAPAS(0.0152)PGS(0.0152)S(0.0152)NDS(0.4773)S(0.4773)AR;
AVPMAPAPASPGSSNDSSAR	AVPMAPAPASPGS[79.9663]SNDSSAR	K	S	724	743	20	2	13S(79.9663)	sp|Q66K74-2|MAP1S_HUMAN	Q66K74-2	MAP1S_HUMAN	MAP1S	Isoform 2 of Microtubule-associated protein 1S		sp|Q66K74|MAP1S_HUMAN	1	5.1635424E7	MS/MS	STY:79.9663@AVPMAPAPAS(0.2394)PGS(0.7249)S(0.0119)NDS(0.0119)S(0.0119)AR;
AVPMAPAPASPGSSNDSSAR	AVPMAPAPAS[79.9663]PGSSNDSSAR	K	S	724	743	20	2	10S(79.9663)	sp|Q66K74-2|MAP1S_HUMAN	Q66K74-2	MAP1S_HUMAN	MAP1S	Isoform 2 of Microtubule-associated protein 1S		sp|Q66K74|MAP1S_HUMAN	1	5.1635424E7	MS/MS	STY:79.9663@AVPMAPAPAS(0.9203)PGS(0.0229)S(0.0201)NDS(0.0183)S(0.0183)AR;
AVPMAPAPASPGSSNDSSAR	AVPM[15.9949]APAPASPGSSNDS[79.9663]SAR	K	S	724	743	20	2	17S(79.9663),4M(15.9949)	sp|Q66K74-2|MAP1S_HUMAN	Q66K74-2	MAP1S_HUMAN	MAP1S	Isoform 2 of Microtubule-associated protein 1S		sp|Q66K74|MAP1S_HUMAN	1	2.461516E7	MS/MS	M:15.9949@AVPM(1.0000)APAPASPGSSNDSSAR;STY:79.9663@AVPMAPAPAS(0.0121)PGS(0.0208)S(0.0208)NDS(0.4732)S(0.4732)AR;
AVPMAPAPASPGSSNDSSAR	AVPM[15.9949]APAPAS[79.9663]PGSSNDSSAR	K	S	724	743	20	2	10S(79.9663),4M(15.9949)	sp|Q66K74-2|MAP1S_HUMAN	Q66K74-2	MAP1S_HUMAN	MAP1S	Isoform 2 of Microtubule-associated protein 1S		sp|Q66K74|MAP1S_HUMAN	2	0	MS/MS	M:15.9949@AVPM(1.0000)APAPASPGSSNDSSAR;STY:79.9663@AVPMAPAPAS(0.9424)PGS(0.0145)S(0.0145)NDS(0.0143)S(0.0143)AR;
AVSEDVSNGSSGSPSPGDTLPWNLGK	AVSEDVSNGSSGSPS[79.9663]PGDTLPWNLGK	R	T	10	35	26	3	15S(79.9663)	sp|Q15149-2|PLEC_HUMAN	Q15149-2	PLEC_HUMAN	PLEC	Isoform 2 of Plectin		sp|Q15149-3|PLEC_HUMAN	2	0	MS/MS	STY:79.9663@AVS(0.0712)EDVS(0.0287)NGS(0.0287)S(0.0287)GS(0.0287)PS(0.8028)PGDT(0.0113)LPWNLGK;
AVSEDVSNGSSGSPSPGDTLPWNLGK	AVSEDVSNGSSGS[79.9663]PSPGDTLPWNLGK	R	T	10	35	26	3	13S(79.9663)	sp|Q15149-2|PLEC_HUMAN	Q15149-2	PLEC_HUMAN	PLEC	Isoform 2 of Plectin		sp|Q15149-3|PLEC_HUMAN	1	0	MS/MS	STY:79.9663@AVS(0.1826)EDVS(0.1826)NGS(0.0089)S(0.0089)GS(0.3059)PS(0.3059)PGDT(0.0053)LPWNLGK;
AVSEDVSNGSSGSPSPGDTLPWNLGK	AVSEDVSNGS[79.9663]SGSPSPGDTLPWNLGK	R	T	10	35	26	3	10S(79.9663)	sp|Q15149-2|PLEC_HUMAN	Q15149-2	PLEC_HUMAN	PLEC	Isoform 2 of Plectin		sp|Q15149-3|PLEC_HUMAN	1	0	MS/MS	STY:79.9663@AVS(0.0554)EDVS(0.0554)NGS(0.5729)S(0.1031)GS(0.1031)PS(0.1031)PGDT(0.0068)LPWNLGK;
AVSEGCASEDEVEGEA	AVSEGC[57.0215]AS[79.9663]EDEVEGEA	R	-	902	917	16	2	6C(57.0215),8S(79.9663)	sp|Q9BYX2-2|TBD2A_HUMAN	Q9BYX2-2	TBD2A_HUMAN	TBC1D2	Isoform 2 of TBC1 domain family member 2A		sp|Q9BYX2-4|TBD2A_HUMAN, sp|Q9BYX2-5|TBD2A_HUMAN, sp|Q9BYX2-6|TBD2A_HUMAN, sp|Q9BYX2|TBD2A_HUMAN	4	1.55322192E8	MS/MS	STY:79.9663@AVS(0.0537)EGCAS(0.9463)EDEVEGEA;
AVSLDSPVSVGSSPPVK	AVSLDS[79.9663]PVSVGS[79.9663]SPPVK	R	N	855	871	17	2	12S(79.9663),6S(79.9663)	sp|Q9Y6Q9-2|NCOA3_HUMAN	Q9Y6Q9-2	NCOA3_HUMAN	NCOA3	Isoform 2 of Nuclear receptor coactivator 3		sp|Q9Y6Q9-3|NCOA3_HUMAN, sp|Q9Y6Q9-5|NCOA3_HUMAN, sp|Q9Y6Q9|NCOA3_HUMAN	1	1.1614242E7	MS/MS	STY:79.9663@AVS(0.0343)LDS(0.5929)PVS(0.3509)VGS(0.5109)S(0.5109)PPVK;
AVSPPHLDGPPSPRSPVIGSEVFLPNSNHVASGAGEAEER	AVSPPHLDGPPSPRSPVIGS[79.9663]EVFLPNSNHVAS[79.9663]GAGEAEER	K	V	468	507	40	4	20S(79.9663),32S(79.9663)	sp|P29590-11|PML_HUMAN	P29590-11	PML_HUMAN	PML	Isoform PML-11 of Protein PML		sp|P29590-12|PML_HUMAN, sp|P29590-13|PML_HUMAN, sp|P29590-2|PML_HUMAN, sp|P29590-3|PML_HUMAN, sp|P29590-5|PML_HUMAN, sp|P29590-8|PML_HUMAN, sp|P29590-9|PML_HUMAN, sp|P29590|PML_HUMAN	1	0	MS/MS	STY:79.9663@AVS(0.2026)PPHLDGPPS(0.2026)PRS(0.1452)PVIGS(0.7008)EVFLPNS(0.0458)NHVAS(0.7030)GAGEAEER;
AVSPPHLDGPPSPRSPVIGSEVFLPNSNHVASGAGEAEER	AVSPPHLDGPPS[79.9663]PRSPVIGS[79.9663]EVFLPNSNHVASGAGEAEER	K	V	468	507	40	4	12S(79.9663),20S(79.9663)	sp|P29590-11|PML_HUMAN	P29590-11	PML_HUMAN	PML	Isoform PML-11 of Protein PML		sp|P29590-12|PML_HUMAN, sp|P29590-13|PML_HUMAN, sp|P29590-2|PML_HUMAN, sp|P29590-3|PML_HUMAN, sp|P29590-5|PML_HUMAN, sp|P29590-8|PML_HUMAN, sp|P29590-9|PML_HUMAN, sp|P29590|PML_HUMAN	1	3.7106844E7	MS/MS	STY:79.9663@AVS(0.1100)PPHLDGPPS(0.4735)PRS(0.4735)PVIGS(0.5752)EVFLPNS(0.2757)NHVAS(0.0921)GAGEAEER;
AVSPPHLDGPPSPRSPVIGSEVFLPNSNHVASGAGEAEER	AVSPPHLDGPPS[79.9663]PRSPVIGS[79.9663]EVFLPNS[79.9663]NHVASGAGEAEER	K	V	468	507	40	4	12S(79.9663),20S(79.9663),27S(79.9663)	sp|P29590-11|PML_HUMAN	P29590-11	PML_HUMAN	PML	Isoform PML-11 of Protein PML		sp|P29590-12|PML_HUMAN, sp|P29590-13|PML_HUMAN, sp|P29590-2|PML_HUMAN, sp|P29590-3|PML_HUMAN, sp|P29590-5|PML_HUMAN, sp|P29590-8|PML_HUMAN, sp|P29590-9|PML_HUMAN, sp|P29590|PML_HUMAN	2	2.70006176E8	MS/MS	STY:79.9663@AVS(0.0483)PPHLDGPPS(0.7043)PRS(0.3317)PVIGS(0.7036)EVFLPNS(0.6859)NHVAS(0.5263)GAGEAEER;
AVSPPHLDGPPSPRSPVIGSEVFLPNSNHVASGAGEAEER	AVSPPHLDGPPS[79.9663]PRS[79.9663]PVIGS[79.9663]EVFLPNSNHVASGAGEAEER	K	V	468	507	40	4	12S(79.9663),15S(79.9663),20S(79.9663)	sp|P29590-11|PML_HUMAN	P29590-11	PML_HUMAN	PML	Isoform PML-11 of Protein PML		sp|P29590-12|PML_HUMAN, sp|P29590-13|PML_HUMAN, sp|P29590-2|PML_HUMAN, sp|P29590-3|PML_HUMAN, sp|P29590-5|PML_HUMAN, sp|P29590-8|PML_HUMAN, sp|P29590-9|PML_HUMAN, sp|P29590|PML_HUMAN	1	0	MS/MS	STY:79.9663@AVS(0.4773)PPHLDGPPS(0.8039)PRS(0.8039)PVIGS(0.8189)EVFLPNS(0.0476)NHVAS(0.0483)GAGEAEER;
AVSEDVSNGSSGSPSPGDTLPWNLGK	AVS[79.9663]EDVSNGSSGSPSPGDTLPWNLGK	R	T	10	35	26	3	3S(79.9663)	sp|Q15149-2|PLEC_HUMAN	Q15149-2	PLEC_HUMAN	PLEC	Isoform 2 of Plectin		sp|Q15149-3|PLEC_HUMAN	3	5771308	MS/MS	STY:79.9663@AVS(0.4642)EDVS(0.4642)NGS(0.0156)S(0.0156)GS(0.0156)PS(0.0156)PGDT(0.0091)LPWNLGK;
AVSEEQQPALK	AVS[79.9663]EEQQPALK	K	G	164	174	11	2	3S(79.9663)	sp|Q8NE71|ABCF1_HUMAN	Q8NE71	ABCF1_HUMAN	ABCF1	ATP-binding cassette sub-family F member 1		sp|Q8NE71-2|ABCF1_HUMAN	1	1.6115818E7	MS/MS	STY:79.9663@AVS(1.0000)EEQQPALK;
AVSEGCASEDEVEGEA	AVS[79.9663]EGC[57.0215]ASEDEVEGEA	R	-	902	917	16	2	3S(79.9663),6C(57.0215)	sp|Q9BYX2-2|TBD2A_HUMAN	Q9BYX2-2	TBD2A_HUMAN	TBC1D2	Isoform 2 of TBC1 domain family member 2A		sp|Q9BYX2-4|TBD2A_HUMAN, sp|Q9BYX2-5|TBD2A_HUMAN, sp|Q9BYX2-6|TBD2A_HUMAN, sp|Q9BYX2|TBD2A_HUMAN	2	4.6032628E7	MS/MS	STY:79.9663@AVS(0.8709)EGCAS(0.1291)EDEVEGEA;
AVSPPHLDGPPSPRSPVIGSEVFLPNSNHVASGAGEAEER	AVS[79.9663]PPHLDGPPSPRSPVIGSEVFLPNS[79.9663]NHVASGAGEAEER	K	V	468	507	40	4	27S(79.9663),3S(79.9663)	sp|P29590-11|PML_HUMAN	P29590-11	PML_HUMAN	PML	Isoform PML-11 of Protein PML		sp|P29590-12|PML_HUMAN, sp|P29590-13|PML_HUMAN, sp|P29590-2|PML_HUMAN, sp|P29590-3|PML_HUMAN, sp|P29590-5|PML_HUMAN, sp|P29590-8|PML_HUMAN, sp|P29590-9|PML_HUMAN, sp|P29590|PML_HUMAN	2	3.6568948E7	MS/MS	STY:79.9663@AVS(0.7723)PPHLDGPPS(0.0740)PRS(0.0740)PVIGS(0.3069)EVFLPNS(0.7489)NHVAS(0.0240)GAGEAEER;
AVSPPHLDGPPSPRSPVIGSEVFLPNSNHVASGAGEAEER	AVS[79.9663]PPHLDGPPSPRSPVIGS[79.9663]EVFLPNS[79.9663]NHVASGAGEAEER	K	V	468	507	40	4	20S(79.9663),27S(79.9663),3S(79.9663)	sp|P29590-11|PML_HUMAN	P29590-11	PML_HUMAN	PML	Isoform PML-11 of Protein PML		sp|P29590-12|PML_HUMAN, sp|P29590-13|PML_HUMAN, sp|P29590-2|PML_HUMAN, sp|P29590-3|PML_HUMAN, sp|P29590-5|PML_HUMAN, sp|P29590-8|PML_HUMAN, sp|P29590-9|PML_HUMAN, sp|P29590|PML_HUMAN	1	0	MS/MS	STY:79.9663@AVS(0.7557)PPHLDGPPS(0.3488)PRS(0.3488)PVIGS(0.7515)EVFLPNS(0.7325)NHVAS(0.0628)GAGEAEER;
AVSPPHLDGPPSPRSPVIGSEVFLPNSNHVASGAGEAEER	AVS[79.9663]PPHLDGPPSPRS[79.9663]PVIGS[79.9663]EVFLPNSNHVASGAGEAEER	K	V	468	507	40	4	15S(79.9663),20S(79.9663),3S(79.9663)	sp|P29590-11|PML_HUMAN	P29590-11	PML_HUMAN	PML	Isoform PML-11 of Protein PML		sp|P29590-12|PML_HUMAN, sp|P29590-13|PML_HUMAN, sp|P29590-2|PML_HUMAN, sp|P29590-3|PML_HUMAN, sp|P29590-5|PML_HUMAN, sp|P29590-8|PML_HUMAN, sp|P29590-9|PML_HUMAN, sp|P29590|PML_HUMAN	1	0	MS/MS	STY:79.9663@AVS(0.7221)PPHLDGPPS(0.4675)PRS(0.7043)PVIGS(0.7150)EVFLPNS(0.1907)NHVAS(0.2003)GAGEAEER;
AVSPPHLDGPPSPR	AVS[79.9663]PPHLDGPPS[79.9663]PR	K	S	468	481	14	2,3	12S(79.9663),3S(79.9663)	sp|P29590-11|PML_HUMAN	P29590-11	PML_HUMAN	PML	Isoform PML-11 of Protein PML		sp|P29590-12|PML_HUMAN, sp|P29590-13|PML_HUMAN, sp|P29590-2|PML_HUMAN, sp|P29590-3|PML_HUMAN, sp|P29590-4|PML_HUMAN, sp|P29590-5|PML_HUMAN, sp|P29590-8|PML_HUMAN, sp|P29590-9|PML_HUMAN, sp|P29590|PML_HUMAN	7	3.03500224E8	MS/MS	STY:79.9663@AVS(1.0000)PPHLDGPPS(1.0000)PR;
AVSPPHLDGPPSPRSPVIGSEVFLPNSNHVASGAGEAEER	AVS[79.9663]PPHLDGPPS[79.9663]PRSPVIGSEVFLPNS[79.9663]NHVASGAGEAEER	K	V	468	507	40	4	12S(79.9663),27S(79.9663),3S(79.9663)	sp|P29590-11|PML_HUMAN	P29590-11	PML_HUMAN	PML	Isoform PML-11 of Protein PML		sp|P29590-12|PML_HUMAN, sp|P29590-13|PML_HUMAN, sp|P29590-2|PML_HUMAN, sp|P29590-3|PML_HUMAN, sp|P29590-5|PML_HUMAN, sp|P29590-8|PML_HUMAN, sp|P29590-9|PML_HUMAN, sp|P29590|PML_HUMAN	2	0	MS/MS	STY:79.9663@AVS(0.9070)PPHLDGPPS(0.9321)PRS(0.0607)PVIGS(0.0805)EVFLPNS(0.9313)NHVAS(0.0883)GAGEAEER;
AVSPPHLDGPPSPRSPVIGSEVFLPNSNHVASGAGEAEER	AVS[79.9663]PPHLDGPPS[79.9663]PRS[79.9663]PVIGSEVFLPNSNHVASGAGEAEER	K	V	468	507	40	4	12S(79.9663),15S(79.9663),3S(79.9663)	sp|P29590-11|PML_HUMAN	P29590-11	PML_HUMAN	PML	Isoform PML-11 of Protein PML		sp|P29590-12|PML_HUMAN, sp|P29590-13|PML_HUMAN, sp|P29590-2|PML_HUMAN, sp|P29590-3|PML_HUMAN, sp|P29590-5|PML_HUMAN, sp|P29590-8|PML_HUMAN, sp|P29590-9|PML_HUMAN, sp|P29590|PML_HUMAN	3	2.70006176E8	MS/MS	STY:79.9663@AVS(0.8125)PPHLDGPPS(0.8109)PRS(0.8138)PVIGS(0.1910)EVFLPNS(0.0567)NHVAS(0.3151)GAGEAEER;
AVSPSSSEK	AVS[79.9663]PSSSEK	K	R	590	598	9	2	3S(79.9663)	sp|Q76FK4-2|NOL8_HUMAN	Q76FK4-2	NOL8_HUMAN	NOL8	Isoform 2 of Nucleolar protein 8		sp|Q76FK4-4|NOL8_HUMAN, sp|Q76FK4|NOL8_HUMAN	1	2427771	MS/MS	STY:79.9663@AVS(0.9393)PS(0.0202)S(0.0202)S(0.0202)EK;
AVTTVTQSTPVPGPSVPPPEELQVSPGPR	AVTTVTQSTPVPGPSVPPPEELQVS[79.9663]PGPR	R	Q	1483	1511	29	3	25S(79.9663)	sp|P51610|HCFC1_HUMAN	P51610	HCFC1_HUMAN	HCFC1	Host cell factor 1		sp|P51610-2|HCFC1_HUMAN	3	7.2108576E7	MS/MS	STY:79.9663@AVT(0.0103)T(0.0103)VT(0.0104)QS(0.0105)T(0.0105)PVPGPS(0.0106)VPPPEELQVS(0.9372)PGPR;
AVTIANSPSK	AVT[79.9663]IANSPSK	K	P	197	206	10	2	3T(79.9663)	sp|Q8NEF9|SRFB1_HUMAN	Q8NEF9	SRFB1_HUMAN	SRFBP1	Serum response factor-binding protein 1			3	5.3726824E7	MS/MS	STY:79.9663@AVT(0.9418)IANS(0.0291)PS(0.0291)K;
AWLDEDSNLSPSPLR	AWLDEDSNLS[79.9663]PS[79.9663]PLR	R	D	121	135	15	2	10S(79.9663),12S(79.9663)	sp|Q9C086|IN80B_HUMAN	Q9C086	IN80B_HUMAN	INO80B	INO80 complex subunit B			1	2.2200308E7	MS/MS	STY:79.9663@AWLDEDS(0.5064)NLS(0.7491)PS(0.7445)PLR;
AYTHQVVTR	AY[79.9663]THQVVTR	R	W	168	176	9	2	2Y(79.9663)	sp|P50613|CDK7_HUMAN	P50613	CDK7_HUMAN	CDK7	Cyclin-dependent kinase 7			2	2.7805808E7	MS/MS	STY:79.9663@AY(0.4910)T(0.4910)HQVVT(0.0180)R;
CAAPRPPSSSPEQR	C[57.0215]AAPRPPSS[79.9663]SPEQR	K	T	838	851	14	2	1C(57.0215),9S(79.9663)	sp|Q5H9R7-2|PP6R3_HUMAN	Q5H9R7-2	PP6R3_HUMAN	PPP6R3	Isoform 2 of Serine/threonine-protein phosphatase 6 regulatory subunit 3		sp|Q5H9R7-4|PP6R3_HUMAN, sp|Q5H9R7-5|PP6R3_HUMAN, sp|Q5H9R7-6|PP6R3_HUMAN, sp|Q5H9R7|PP6R3_HUMAN	2	1.5249123E7	MS/MS	STY:79.9663@CAAPRPPS(0.0277)S(0.4861)S(0.4861)PEQR;
CCPEQEEGESAAGGSGAGGDSAIEQGGQGSALAPSPVSGVR	C[57.0215]C[57.0215]PEQEEGES[79.9663]AAGGSGAGGDSAIEQGGQGSALAPSPVSGVR	R	R	10	50	41	3	10S(79.9663),1C(57.0215),2C(57.0215)	sp|Q9UBB5|MBD2_HUMAN	Q9UBB5	MBD2_HUMAN	MBD2	Methyl-CpG-binding domain protein 2		sp|Q9UBB5-3|MBD2_HUMAN	1	0	MS/MS	STY:79.9663@CCPEQEEGES(0.4500)AAGGS(0.0190)GAGGDS(0.0274)AIEQGGQGS(0.1679)ALAPS(0.1679)PVS(0.1679)GVR;
CDDSPRTPSNTPSAEADWSPGLELHPDYK	C[57.0215]DDSPRT[79.9663]PSNT[79.9663]PS[79.9663]AEADWSPGLELHPDYK	R	T	15	43	29	4	11T(79.9663),13S(79.9663),1C(57.0215),7T(79.9663)	sp|Q9Y3Z3-3|SAMH1_HUMAN	Q9Y3Z3-3	SAMH1_HUMAN	SAMHD1	Isoform 3 of Deoxynucleoside triphosphate triphosphohydrolase SAMHD1		sp|Q9Y3Z3-4|SAMH1_HUMAN, sp|Q9Y3Z3|SAMH1_HUMAN	1	5494783	MS/MS	STY:79.9663@CDDS(0.1070)PRT(0.4889)PS(0.4889)NT(0.4976)PS(0.4976)AEADWS(0.4791)PGLELHPDY(0.4408)K;
CDDSPRTPSNTPSAEADWSPGLELHPDYK	C[57.0215]DDSPRT[79.9663]PS[79.9663]NT[79.9663]PSAEADWSPGLELHPDYK	R	T	15	43	29	3	11T(79.9663),1C(57.0215),7T(79.9663),9S(79.9663)	sp|Q9Y3Z3-3|SAMH1_HUMAN	Q9Y3Z3-3	SAMH1_HUMAN	SAMHD1	Isoform 3 of Deoxynucleoside triphosphate triphosphohydrolase SAMHD1		sp|Q9Y3Z3-4|SAMH1_HUMAN, sp|Q9Y3Z3|SAMH1_HUMAN	1	0	MS/MS	STY:79.9663@CDDS(0.0380)PRT(0.6236)PS(0.6236)NT(0.6236)PS(0.4193)AEADWS(0.2622)PGLELHPDY(0.4096)K;
CDDSPRTPSNTPSAEADWSPGLELHPDYK	C[57.0215]DDS[79.9663]PRT[79.9663]PSNTPSAEADWS[79.9663]PGLELHPDYK	R	T	15	43	29	3	19S(79.9663),1C(57.0215),4S(79.9663),7T(79.9663)	sp|Q9Y3Z3-3|SAMH1_HUMAN	Q9Y3Z3-3	SAMH1_HUMAN	SAMHD1	Isoform 3 of Deoxynucleoside triphosphate triphosphohydrolase SAMHD1		sp|Q9Y3Z3-4|SAMH1_HUMAN, sp|Q9Y3Z3|SAMH1_HUMAN	1	0	MS/MS	STY:79.9663@CDDS(0.4244)PRT(0.4244)PS(0.4244)NT(0.4244)PS(0.4244)AEADWS(0.4816)PGLELHPDY(0.3964)K;
CDGDASPPSPAR	C[57.0215]DGDAS[79.9663]PPS[79.9663]PAR	R	W	15	26	12	2	1C(57.0215),6S(79.9663),9S(79.9663)	sp|Q14493|SLBP_HUMAN	Q14493	SLBP_HUMAN	SLBP	Histone RNA hairpin-binding protein			3	5.0484156E7	MS/MS	STY:79.9663@CDGDAS(1.0000)PPS(1.0000)PAR;
CDSSPDSAEDVR	C[57.0215]DSSPDS[79.9663]AEDVR	K	K	132	143	12	2	1C(57.0215),7S(79.9663)	sp|P02765|FETUA_HUMAN	P02765	FETUA_HUMAN	AHSG	Alpha-2-HS-glycoprotein			2	2.1109128E7	MS/MS	STY:79.9663@CDS(0.0275)S(0.0275)PDS(0.9451)AEDVR;
CDSADLR	C[57.0215]DS[79.9663]ADLR	R	H	686	692	7	2	1C(57.0215),3S(79.9663)	sp|Q9NYF8-2|BCLF1_HUMAN	Q9NYF8-2	BCLF1_HUMAN	BCLAF1	Isoform 2 of Bcl-2-associated transcription factor 1		sp|Q9NYF8-3|BCLF1_HUMAN, sp|Q9NYF8-4|BCLF1_HUMAN, sp|Q9NYF8|BCLF1_HUMAN	1	8773710	MS/MS	STY:79.9663@CDS(1.0000)ADLR;
CGSGPVHISGQHLVAVEEDAESEDEEEEDVK	C[57.0215]GSGPVHISGQHLVAVEEDAES[79.9663]EDEEEEDVK	K	L	104	134	31	3,4	1C(57.0215),22S(79.9663)	sp|P06748|NPM_HUMAN	P06748	NPM_HUMAN	NPM1	Nucleophosmin		sp|P06748-2|NPM_HUMAN, sp|P06748-3|NPM_HUMAN	123	9.14739E9	MS/MS	STY:79.9663@CGS(0.0279)GPVHIS(0.0281)GQHLVAVEEDAES(0.9440)EDEEEEDVK;
CGSGPVHISGQHLVAVEEDAESEDEEEEDVK	C[57.0215]GSGPVHIS[79.9663]GQHLVAVEEDAESEDEEEEDVK	K	L	104	134	31	3,4	1C(57.0215),9S(79.9663)	sp|P06748|NPM_HUMAN	P06748	NPM_HUMAN	NPM1	Nucleophosmin		sp|P06748-2|NPM_HUMAN, sp|P06748-3|NPM_HUMAN	6	0	MS/MS	STY:79.9663@CGS(0.1099)GPVHIS(0.8134)GQHLVAVEEDAES(0.0767)EDEEEEDVK;
CGSGPVHISGQHLVAVEEDAESEDEEEEDVK	C[57.0215]GS[79.9663]GPVHISGQHLVAVEEDAESEDEEEEDVK	K	L	104	134	31	3,4	1C(57.0215),3S(79.9663)	sp|P06748|NPM_HUMAN	P06748	NPM_HUMAN	NPM1	Nucleophosmin		sp|P06748-2|NPM_HUMAN, sp|P06748-3|NPM_HUMAN	7	1.34292531E9	MS/MS	STY:79.9663@CGS(0.9387)GPVHIS(0.0324)GQHLVAVEEDAES(0.0289)EDEEEEDVK;
CGSSEDLHDSVR	C[57.0215]GS[79.9663]S[79.9663]EDLHDSVR	R	E	636	647	12	2	1C(57.0215),3S(79.9663),4S(79.9663)	sp|Q7Z4V5-3|HDGR2_HUMAN	Q7Z4V5-3	HDGR2_HUMAN	HDGFL2	Isoform 3 of Hepatoma-derived growth factor-related protein 2		sp|Q7Z4V5|HDGR2_HUMAN	1	2.0898886E7	MS/MS	STY:79.9663@CGS(0.9133)S(0.9133)EDLHDS(0.1735)VR;
CICPSLPYSPVSSPQSSPR	C[57.0215]IC[57.0215]PSLPYSPVSSPQS[79.9663]S[79.9663]PR	R	L	121	139	19	3	16S(79.9663),17S(79.9663),1C(57.0215),3C(57.0215)	sp|Q96RR4-2|KKCC2_HUMAN	Q96RR4-2	KKCC2_HUMAN	CAMKK2	Isoform 2 of Calcium/calmodulin-dependent protein kinase kinase 2		sp|Q96RR4-3|KKCC2_HUMAN, sp|Q96RR4-4|KKCC2_HUMAN, sp|Q96RR4-5|KKCC2_HUMAN, sp|Q96RR4-6|KKCC2_HUMAN, sp|Q96RR4-7|KKCC2_HUMAN, sp|Q96RR4|KKCC2_HUMAN	1	5032295	MS/MS	STY:79.9663@CICPS(0.0784)LPY(0.3887)S(0.3887)PVS(0.0333)S(0.0333)PQS(0.5388)S(0.5388)PR;
CLSPDDSTVK	C[57.0215]LSPDDS[79.9663]TVK	R	M	984	993	10	2	1C(57.0215),7S(79.9663)	sp|P78559-2|MAP1A_HUMAN	P78559-2	MAP1A_HUMAN	MAP1A	Isoform 2 of Microtubule-associated protein 1A		sp|P78559|MAP1A_HUMAN	1	0	MS/MS	STY:79.9663@CLS(0.1417)PDDS(0.4292)T(0.4292)VK;
CPEAIFQPSFLGIESSGIHETTFNSIMK	C[57.0215]PEAIFQPSFLGIES[79.9663]SGIHETTFNSIMK	R	C	258	285	28	3	15S(79.9663),1C(57.0215)	sp|Q562R1|ACTBL_HUMAN	Q562R1	ACTBL_HUMAN	ACTBL2	Beta-actin-like protein 2			1	0	MS/MS	STY:79.9663@CPEAIFQPS(0.0126)FLGIES(0.9325)S(0.0160)GIHET(0.0130)T(0.0130)FNS(0.0130)IMK;
CPFPAGAALACCSEDEEDDEEHEGGGSR	C[57.0215]PFPAGAALAC[57.0215]C[57.0215]SEDEEDDEEHEGGGS[79.9663]R	R	S	27	54	28	3	11C(57.0215),12C(57.0215),1C(57.0215),27S(79.9663)	sp|Q147X3|NAA30_HUMAN	Q147X3	NAA30_HUMAN	NAA30	N-alpha-acetyltransferase 30			1	0	MS/MS	STY:79.9663@CPFPAGAALACCS(0.1588)EDEEDDEEHEGGGS(0.8412)R;
CPFPAGAALACCSEDEEDDEEHEGGGSR	C[57.0215]PFPAGAALAC[57.0215]C[57.0215]S[79.9663]EDEEDDEEHEGGGSR	R	S	27	54	28	3	11C(57.0215),12C(57.0215),13S(79.9663),1C(57.0215)	sp|Q147X3|NAA30_HUMAN	Q147X3	NAA30_HUMAN	NAA30	N-alpha-acetyltransferase 30			5	5.1144696E7	MS/MS	STY:79.9663@CPFPAGAALACCS(0.9249)EDEEDDEEHEGGGS(0.0751)R;
CPTEVLLTPPTPLPPPSPPPTASDR	C[57.0215]PTEVLLTPPTPLPPPSPPPT[79.9663]ASDR	K	G	62	86	25	3	1C(57.0215),21T(79.9663)	sp|Q6ZMT1|STAC2_HUMAN	Q6ZMT1	STAC2_HUMAN	STAC2	SH3 and cysteine-rich domain-containing protein 2			1	2.1571012E7	MS/MS	STY:79.9663@CPT(0.0338)EVLLT(0.0338)PPT(0.0851)PLPPPS(0.2422)PPPT(0.3966)AS(0.2085)DR;
CQPGGGPPSPPPGIPGQPLPSPTR	C[57.0215]QPGGGPPSPPPGIPGQPLPS[79.9663]PT[79.9663]R	R	L	752	775	24	3	1C(57.0215),21S(79.9663),23T(79.9663)	sp|Q9C0C4|SEM4C_HUMAN	Q9C0C4	SEM4C_HUMAN	SEMA4C	Semaphorin-4C			1	1.2600922E7	MS/MS	STY:79.9663@CQPGGGPPS(0.1565)PPPGIPGQPLPS(0.9218)PT(0.9218)R;
CQPGGGPPSPPPGIPGQPLPSPTR	C[57.0215]QPGGGPPS[79.9663]PPPGIPGQPLPS[79.9663]PTR	R	L	752	775	24	3	1C(57.0215),21S(79.9663),9S(79.9663)	sp|Q9C0C4|SEM4C_HUMAN	Q9C0C4	SEM4C_HUMAN	SEMA4C	Semaphorin-4C			1	1.2600922E7	MS/MS	STY:79.9663@CQPGGGPPS(0.6894)PPPGIPGQPLPS(0.6553)PT(0.6553)R;
CQTAEADSESDHEVPEPESEMK	C[57.0215]QTAEADSES[79.9663]DHEVPEPESEMK	R	M	966	987	22	3	10S(79.9663),1C(57.0215)	sp|Q9BPX3|CND3_HUMAN	Q9BPX3	CND3_HUMAN	NCAPG	Condensin complex subunit 3			1	8.9727152E7	MS/MS	STY:79.9663@CQT(0.0127)AEADS(0.0448)ES(0.4826)DHEVPEPES(0.4599)EMK;
CQTAEADSESDHEVPEPESEMK	C[57.0215]QTAEADSES[79.9663]DHEVPEPES[79.9663]EMK	R	M	966	987	22	3	10S(79.9663),19S(79.9663),1C(57.0215)	sp|Q9BPX3|CND3_HUMAN	Q9BPX3	CND3_HUMAN	NCAPG	Condensin complex subunit 3			2	3.92763424E8	MS/MS	STY:79.9663@CQT(0.4820)AEADS(0.2635)ES(0.6158)DHEVPEPES(0.6388)EMK;
CQTAEADSESDHEVPEPESEMK	C[57.0215]QTAEADS[79.9663]ESDHEVPEPESEMK	R	M	966	987	22	3	1C(57.0215),8S(79.9663)	sp|Q9BPX3|CND3_HUMAN	Q9BPX3	CND3_HUMAN	NCAPG	Condensin complex subunit 3			3	8.9727152E7	MS/MS	STY:79.9663@CQT(0.0210)AEADS(0.9069)ES(0.0486)DHEVPEPES(0.0235)EMK;
CQTAEADSESDHEVPEPESEMK	C[57.0215]QTAEADS[79.9663]ESDHEVPEPESEM[15.9949]K	R	M	966	987	22	3	1C(57.0215),21M(15.9949),8S(79.9663)	sp|Q9BPX3|CND3_HUMAN	Q9BPX3	CND3_HUMAN	NCAPG	Condensin complex subunit 3			1	0	MS/MS	M:15.9949@CQTAEADSESDHEVPEPESEM(1.0000)K;STY:79.9663@CQT(0.0245)AEADS(0.4776)ES(0.4776)DHEVPEPES(0.0202)EMK;
CQTAEADSESDHEVPEPESEMK	C[57.0215]QTAEADS[79.9663]ESDHEVPEPES[79.9663]EM[15.9949]K	R	M	966	987	22	3	19S(79.9663),1C(57.0215),21M(15.9949),8S(79.9663)	sp|Q9BPX3|CND3_HUMAN	Q9BPX3	CND3_HUMAN	NCAPG	Condensin complex subunit 3			1	2.4450746E7	MS/MS	M:15.9949@CQTAEADSESDHEVPEPESEM(1.0000)K;STY:79.9663@CQT(0.4308)AEADS(0.5070)ES(0.5070)DHEVPEPES(0.5551)EMK;
CQTAEADSESDHEVPEPESEMK	C[57.0215]QTAEADS[79.9663]ES[79.9663]DHEVPEPESEMK	R	M	966	987	22	3	10S(79.9663),1C(57.0215),8S(79.9663)	sp|Q9BPX3|CND3_HUMAN	Q9BPX3	CND3_HUMAN	NCAPG	Condensin complex subunit 3			6	3.92763424E8	MS/MS	STY:79.9663@CQT(0.0630)AEADS(0.9178)ES(0.9177)DHEVPEPES(0.1014)EMK;
CQTAEADSESDHEVPEPESEMK	C[57.0215]QTAEADS[79.9663]ES[79.9663]DHEVPEPESEM[15.9949]K	R	M	966	987	22	3	10S(79.9663),1C(57.0215),21M(15.9949),8S(79.9663)	sp|Q9BPX3|CND3_HUMAN	Q9BPX3	CND3_HUMAN	NCAPG	Condensin complex subunit 3			5	8.8099712E7	MS/MS	M:15.9949@CQTAEADSESDHEVPEPESEM(1.0000)K;STY:79.9663@CQT(0.2452)AEADS(0.8385)ES(0.8385)DHEVPEPES(0.0778)EMK;
CQTAEADSESDHEVPEPESEMK	C[57.0215]QT[79.9663]AEADSESDHEVPEPESEMK	R	M	966	987	22	3	1C(57.0215),3T(79.9663)	sp|Q9BPX3|CND3_HUMAN	Q9BPX3	CND3_HUMAN	NCAPG	Condensin complex subunit 3			4	8.9727152E7	MS/MS	STY:79.9663@CQT(0.5707)AEADS(0.0328)ES(0.0328)DHEVPEPES(0.3636)EMK;
CQTAEADSESDHEVPEPESEMK	C[57.0215]QT[79.9663]AEADSESDHEVPEPESEM[15.9949]K	R	M	966	987	22	3	1C(57.0215),21M(15.9949),3T(79.9663)	sp|Q9BPX3|CND3_HUMAN	Q9BPX3	CND3_HUMAN	NCAPG	Condensin complex subunit 3			2	1.8592858E7	MS/MS	M:15.9949@CQTAEADSESDHEVPEPESEM(1.0000)K;STY:79.9663@CQT(0.8543)AEADS(0.0559)ES(0.0559)DHEVPEPES(0.0339)EMK;
CQTAEADSESDHEVPEPESEMK	C[57.0215]QT[79.9663]AEADSESDHEVPEPES[79.9663]EMK	R	M	966	987	22	3	19S(79.9663),1C(57.0215),3T(79.9663)	sp|Q9BPX3|CND3_HUMAN	Q9BPX3	CND3_HUMAN	NCAPG	Condensin complex subunit 3			4	3.92763424E8	MS/MS	STY:79.9663@CQT(0.9214)AEADS(0.1006)ES(0.0552)DHEVPEPES(0.9228)EMK;
CQTAEADSESDHEVPEPESEMK	C[57.0215]QT[79.9663]AEADSES[79.9663]DHEVPEPESEMK	R	M	966	987	22	3	10S(79.9663),1C(57.0215),3T(79.9663)	sp|Q9BPX3|CND3_HUMAN	Q9BPX3	CND3_HUMAN	NCAPG	Condensin complex subunit 3			1	0	MS/MS	STY:79.9663@CQT(0.7946)AEADS(0.1104)ES(0.7963)DHEVPEPES(0.2987)EMK;
CQTAEADSESDHEVPEPESEMK	C[57.0215]QT[79.9663]AEADSES[79.9663]DHEVPEPESEM[15.9949]K	R	M	966	987	22	3	10S(79.9663),1C(57.0215),21M(15.9949),3T(79.9663)	sp|Q9BPX3|CND3_HUMAN	Q9BPX3	CND3_HUMAN	NCAPG	Condensin complex subunit 3			1	8.8099712E7	MS/MS	M:15.9949@CQTAEADSESDHEVPEPESEM(1.0000)K;STY:79.9663@CQT(0.6480)AEADS(0.6067)ES(0.6944)DHEVPEPES(0.0509)EMK;
CQTAEADSESDHEVPEPESEMK	C[57.0215]QT[79.9663]AEADS[79.9663]ESDHEVPEPESEMK	R	M	966	987	22	3	1C(57.0215),3T(79.9663),8S(79.9663)	sp|Q9BPX3|CND3_HUMAN	Q9BPX3	CND3_HUMAN	NCAPG	Condensin complex subunit 3			9	4.21585184E8	MS/MS	STY:79.9663@CQT(0.6433)AEADS(0.6433)ES(0.6433)DHEVPEPES(0.0702)EMK;
CQTAEADSESDHEVPEPESEMK	C[57.0215]QT[79.9663]AEADS[79.9663]ESDHEVPEPESEM[15.9949]K	R	M	966	987	22	3	1C(57.0215),21M(15.9949),3T(79.9663),8S(79.9663)	sp|Q9BPX3|CND3_HUMAN	Q9BPX3	CND3_HUMAN	NCAPG	Condensin complex subunit 3			4	8.8099712E7	MS/MS	M:15.9949@CQTAEADSESDHEVPEPESEM(1.0000)K;STY:79.9663@CQT(0.9165)AEADS(0.9149)ES(0.1170)DHEVPEPES(0.0517)EMK;
CSGPGLSPGMVR	C[57.0215]SGPGLS[79.9663]PGMVR	K	A	1453	1464	12	2	1C(57.0215),7S(79.9663)	sp|P21333-2|FLNA_HUMAN	P21333-2	FLNA_HUMAN	FLNA	Isoform 2 of Filamin-A		sp|P21333|FLNA_HUMAN	7	1.93919264E8	MS/MS	STY:79.9663@CS(0.0538)GPGLS(0.9462)PGMVR;
CSSSSGGGSSGDEDGLELDGAPGGGK	C[57.0215]SSSSGGGSS[79.9663]GDEDGLELDGAPGGGK	R	R	42	67	26	3	10S(79.9663),1C(57.0215)	sp|Q9P258|RCC2_HUMAN	Q9P258	RCC2_HUMAN	RCC2	Protein RCC2			1	0	MS/MS	STY:79.9663@CS(0.0190)S(0.0190)S(0.0190)S(0.0190)GGGS(0.0661)S(0.8577)GDEDGLELDGAPGGGK;
CSVCPDYDLCSVCEGK	C[57.0215]SVC[57.0215]PDYDLC[57.0215]S[79.9663]VC[57.0215]EGK	K	G	142	157	16	2	10C(57.0215),11S(79.9663),13C(57.0215),1C(57.0215),4C(57.0215)	sp|Q13501|SQSTM_HUMAN	Q13501	SQSTM_HUMAN	SQSTM1	Sequestosome-1		sp|Q13501-2|SQSTM_HUMAN	1	0	MS/MS	STY:79.9663@CS(0.0571)VCPDY(0.4361)DLCS(0.5068)VCEGK;
CSVSLSNVEAR	C[57.0215]SVSLS[79.9663]NVEAR	R	R	726	736	11	2	1C(57.0215),6S(79.9663)	sp|P47712|PA24A_HUMAN	P47712	PA24A_HUMAN	PLA2G4A	Cytosolic phospholipase A2			3	3.04587104E8	MS/MS	STY:79.9663@CS(0.0295)VS(0.0295)LS(0.9410)NVEAR;
CSVSLSNVEAR	C[57.0215]SVS[79.9663]LSNVEAR	R	R	726	736	11	2	1C(57.0215),4S(79.9663)	sp|P47712|PA24A_HUMAN	P47712	PA24A_HUMAN	PLA2G4A	Cytosolic phospholipase A2			3	2.7991356E7	MS/MS	STY:79.9663@CS(0.0174)VS(0.4913)LS(0.4913)NVEAR;
CSVSLSNVEAR	C[57.0215]SVS[79.9663]LS[79.9663]NVEAR	R	R	726	736	11	2	1C(57.0215),4S(79.9663),6S(79.9663)	sp|P47712|PA24A_HUMAN	P47712	PA24A_HUMAN	PLA2G4A	Cytosolic phospholipase A2			2	6.481594E7	MS/MS	STY:79.9663@CS(0.1073)VS(0.9463)LS(0.9463)NVEAR;
CSGPGLSPGMVR	C[57.0215]S[79.9663]GPGLSPGMVR	K	A	1453	1464	12	2	1C(57.0215),2S(79.9663)	sp|P21333-2|FLNA_HUMAN	P21333-2	FLNA_HUMAN	FLNA	Isoform 2 of Filamin-A		sp|P21333|FLNA_HUMAN	1	0	MS/MS	STY:79.9663@CS(0.6329)GPGLS(0.3671)PGMVR;
CSGPGLSPGMVR	C[57.0215]S[79.9663]GPGLSPGM[15.9949]VR	K	A	1453	1464	12	2	10M(15.9949),1C(57.0215),2S(79.9663)	sp|P21333-2|FLNA_HUMAN	P21333-2	FLNA_HUMAN	FLNA	Isoform 2 of Filamin-A		sp|P21333|FLNA_HUMAN	2	3.0765514E7	MS/MS	M:15.9949@CSGPGLSPGM(1.0000)VR;STY:79.9663@CS(0.9403)GPGLS(0.0597)PGMVR;
CSPSESPLMEK	C[57.0215]S[79.9663]PSES[79.9663]PLMEK	K	K	264	274	11	2	1C(57.0215),2S(79.9663),6S(79.9663)	sp|Q8WUM9|S20A1_HUMAN	Q8WUM9	S20A1_HUMAN	SLC20A1	Sodium-dependent phosphate transporter 1			1	1.6345865E7	MS/MS	STY:79.9663@CS(0.9440)PS(0.1120)ES(0.9439)PLMEK;
CSPSESPLMEK	C[57.0215]S[79.9663]PS[79.9663]ESPLMEK	K	K	264	274	11	2	1C(57.0215),2S(79.9663),4S(79.9663)	sp|Q8WUM9|S20A1_HUMAN	Q8WUM9	S20A1_HUMAN	SLC20A1	Sodium-dependent phosphate transporter 1			1	0	MS/MS	STY:79.9663@CS(0.7243)PS(0.7317)ES(0.5440)PLMEK;
CSPTVAFVEFPSSPQLK	C[57.0215]S[79.9663]PTVAFVEFPSSPQLK	R	N	669	685	17	2	1C(57.0215),2S(79.9663)	sp|Q9UPQ0-10|LIMC1_HUMAN	Q9UPQ0-10	LIMC1_HUMAN	LIMCH1	Isoform 10 of LIM and calponin homology domains-containing protein 1		sp|Q9UPQ0-2|LIMC1_HUMAN, sp|Q9UPQ0-3|LIMC1_HUMAN, sp|Q9UPQ0-4|LIMC1_HUMAN, sp|Q9UPQ0-5|LIMC1_HUMAN, sp|Q9UPQ0-6|LIMC1_HUMAN, sp|Q9UPQ0-8|LIMC1_HUMAN, sp|Q9UPQ0-9|LIMC1_HUMAN, sp|Q9UPQ0|LIMC1_HUMAN	1	0	MS/MS	STY:79.9663@CS(0.4492)PT(0.4492)VAFVEFPS(0.0508)S(0.0508)PQLK;
CSSSSGGGSSGDEDGLELDGAPGGGK	C[57.0215]S[79.9663]SSSGGGSSGDEDGLELDGAPGGGK	R	R	42	67	26	3	1C(57.0215),2S(79.9663)	sp|Q9P258|RCC2_HUMAN	Q9P258	RCC2_HUMAN	RCC2	Protein RCC2			1	0	MS/MS	STY:79.9663@CS(0.2296)S(0.2296)S(0.2296)S(0.2296)GGGS(0.0099)S(0.0719)GDEDGLELDGAPGGGK;
CSSSSGGGSSGDEDGLELDGAPGGGK	C[57.0215]S[79.9663]SSSGGGS[79.9663]SGDEDGLELDGAPGGGK	R	R	42	67	26	3	1C(57.0215),2S(79.9663),9S(79.9663)	sp|Q9P258|RCC2_HUMAN	Q9P258	RCC2_HUMAN	RCC2	Protein RCC2			1	2.2178552E7	MS/MS	STY:79.9663@CS(0.3882)S(0.3882)S(0.3882)S(0.3882)GGGS(0.4328)S(0.0143)GDEDGLELDGAPGGGK;
CSSSSGGGSSGDEDGLELDGAPGGGK	C[57.0215]S[79.9663]S[79.9663]S[79.9663]SGGGSSGDEDGLELDGAPGGGK	R	R	42	67	26	3	1C(57.0215),2S(79.9663),3S(79.9663),4S(79.9663)	sp|Q9P258|RCC2_HUMAN	Q9P258	RCC2_HUMAN	RCC2	Protein RCC2			2	3.14978e+06	MS/MS	STY:79.9663@CS(0.7234)S(0.6610)S(0.6610)S(0.6610)GGGS(0.1469)S(0.1469)GDEDGLELDGAPGGGK;
CSVSLSNVEAR	C[57.0215]S[79.9663]VSLSNVEAR	R	R	726	736	11	2	1C(57.0215),2S(79.9663)	sp|P47712|PA24A_HUMAN	P47712	PA24A_HUMAN	PLA2G4A	Cytosolic phospholipase A2			4	3.04587104E8	MS/MS	STY:79.9663@CS(0.9438)VS(0.0287)LS(0.0275)NVEAR;
CSVSLSNVEAR	C[57.0215]S[79.9663]VSLS[79.9663]NVEAR	R	R	726	736	11	2	1C(57.0215),2S(79.9663),6S(79.9663)	sp|P47712|PA24A_HUMAN	P47712	PA24A_HUMAN	PLA2G4A	Cytosolic phospholipase A2			1	6.481594E7	MS/MS	STY:79.9663@CS(0.9434)VS(0.1108)LS(0.9457)NVEAR;
CSVSLSNVEAR	C[57.0215]S[79.9663]VS[79.9663]LSNVEAR	R	R	726	736	11	2	1C(57.0215),2S(79.9663),4S(79.9663)	sp|P47712|PA24A_HUMAN	P47712	PA24A_HUMAN	PLA2G4A	Cytosolic phospholipase A2			1	0	MS/MS	STY:79.9663@CS(0.8319)VS(0.8319)LS(0.3362)NVEAR;
CTLPEHESPSQDISDACEAESTER	C[57.0215]TLPEHESPS[79.9663]QDISDAC[57.0215]EAESTER	R	C	702	725	24	3	10S(79.9663),17C(57.0215),1C(57.0215)	sp|Q32MZ4-2|LRRF1_HUMAN	Q32MZ4-2	LRRF1_HUMAN	LRRFIP1	Isoform 2 of Leucine-rich repeat flightless-interacting protein 1		sp|Q32MZ4-3|LRRF1_HUMAN, sp|Q32MZ4|LRRF1_HUMAN	1	7.9850368E7	MS/MS	STY:79.9663@CT(0.0113)LPEHES(0.0123)PS(0.9170)QDIS(0.0203)DACEAES(0.0196)T(0.0196)ER;
CTLPEHESPSQDISDACEAESTER	C[57.0215]TLPEHES[79.9663]PSQDISDAC[57.0215]EAESTER	R	C	702	725	24	3	17C(57.0215),1C(57.0215),8S(79.9663)	sp|Q32MZ4-2|LRRF1_HUMAN	Q32MZ4-2	LRRF1_HUMAN	LRRFIP1	Isoform 2 of Leucine-rich repeat flightless-interacting protein 1		sp|Q32MZ4-3|LRRF1_HUMAN, sp|Q32MZ4|LRRF1_HUMAN	1	7.9850368E7	MS/MS	STY:79.9663@CT(0.0160)LPEHES(0.8782)PS(0.0131)QDIS(0.0286)DACEAES(0.0321)T(0.0321)ER;
CVSVQTDPTDEIPTK	C[57.0215]VS[79.9663]VQTDPTDEIPTK	R	K	92	106	15	2	1C(57.0215),3S(79.9663)	sp|P18583-10|SON_HUMAN	P18583-10	SON_HUMAN	SON	Isoform J of Protein SON		sp|P18583-2|SON_HUMAN, sp|P18583-3|SON_HUMAN, sp|P18583-4|SON_HUMAN, sp|P18583-5|SON_HUMAN, sp|P18583-6|SON_HUMAN, sp|P18583-7|SON_HUMAN, sp|P18583-8|SON_HUMAN, sp|P18583-9|SON_HUMAN, sp|P18583|SON_HUMAN	1	0	MS/MS	STY:79.9663@CVS(0.9226)VQT(0.0248)DPT(0.0229)DEIPT(0.0298)K;
DADSQNPDAPEGK	DADS[79.9663]QNPDAPEGK	K	R	399	411	13	2	4S(79.9663)	sp|P53621-2|COPA_HUMAN	P53621-2	COPA_HUMAN	COPA	Isoform 2 of Coatomer subunit alpha		sp|P53621|COPA_HUMAN	5	5.1969068E7	MS/MS	STY:79.9663@DADS(1.0000)QNPDAPEGK;
DAEYIYPSLESDDDDPALK	DAEYIYPSLES[79.9663]DDDDPALK	K	S	811	829	19	2	11S(79.9663)	sp|Q9UPP1-2|PHF8_HUMAN	Q9UPP1-2	PHF8_HUMAN	PHF8	Isoform 2 of Histone lysine demethylase PHF8		sp|Q9UPP1-3|PHF8_HUMAN, sp|Q9UPP1-4|PHF8_HUMAN, sp|Q9UPP1-5|PHF8_HUMAN, sp|Q9UPP1|PHF8_HUMAN	1	1.5728882E7	MS/MS	STY:79.9663@DAEY(0.0380)IY(0.0194)PS(0.0231)LES(0.9195)DDDDPALK;
DAGDPSPPNK	DAGDPS[79.9663]PPNK	R	M	3	12	10	2	6S(79.9663)	sp|Q9BTA9-2|WAC_HUMAN	Q9BTA9-2	WAC_HUMAN	WAC	Isoform 2 of WW domain-containing adapter protein with coiled-coil		sp|Q9BTA9-3|WAC_HUMAN, sp|Q9BTA9-5|WAC_HUMAN, sp|Q9BTA9|WAC_HUMAN	3	3.2235954E7	MS/MS	STY:79.9663@DAGDPS(1.0000)PPNK;
DAGGPRPESPVPAGR	DAGGPRPES[79.9663]PVPAGR	R	A	8	22	15	2,3	9S(79.9663)	sp|Q9BVG9|PTSS2_HUMAN	Q9BVG9	PTSS2_HUMAN	PTDSS2	Phosphatidylserine synthase 2			3	4.9894896E7	MS/MS	STY:79.9663@DAGGPRPES(1.0000)PVPAGR;
DAHDVSPTSTDTEAQLTVER	DAHDVSPTSTDT[79.9663]EAQLTVER	R	Q	189	208	20	3	12T(79.9663)	sp|Q8IVF2-3|AHNK2_HUMAN	Q8IVF2-3	AHNK2_HUMAN	AHNAK2	Isoform 3 of Protein AHNAK2		sp|Q8IVF2|AHNK2_HUMAN	1	0	MS/MS	STY:79.9663@DAHDVS(0.0325)PT(0.0167)S(0.0194)T(0.0194)DT(0.8944)EAQLT(0.0176)VER;
DAHDVSPTSTDTEAQLTVER	DAHDVSPTS[79.9663]TDTEAQLTVER	R	Q	189	208	20	3	9S(79.9663)	sp|Q8IVF2-3|AHNK2_HUMAN	Q8IVF2-3	AHNK2_HUMAN	AHNAK2	Isoform 3 of Protein AHNAK2		sp|Q8IVF2|AHNK2_HUMAN	2	7.225136E7	MS/MS	STY:79.9663@DAHDVS(0.0120)PT(0.0120)S(0.9370)T(0.0158)DT(0.0119)EAQLT(0.0112)VER;
DAHDVSPTSTDTEAQLTVER	DAHDVS[79.9663]PTSTDTEAQLTVER	R	Q	189	208	20	3	6S(79.9663)	sp|Q8IVF2-3|AHNK2_HUMAN	Q8IVF2-3	AHNK2_HUMAN	AHNAK2	Isoform 3 of Protein AHNAK2		sp|Q8IVF2|AHNK2_HUMAN	5	7.225136E7	MS/MS	STY:79.9663@DAHDVS(0.9340)PT(0.0136)S(0.0119)T(0.0118)DT(0.0114)EAQLT(0.0173)VER;
DAHDVSPTSTDTEAQLTVER	DAHDVS[79.9663]PT[79.9663]STDTEAQLTVER	R	Q	189	208	20	3	6S(79.9663),8T(79.9663)	sp|Q8IVF2-3|AHNK2_HUMAN	Q8IVF2-3	AHNK2_HUMAN	AHNAK2	Isoform 3 of Protein AHNAK2		sp|Q8IVF2|AHNK2_HUMAN	2	6166931	MS/MS	STY:79.9663@DAHDVS(0.5527)PT(0.5527)S(0.5527)T(0.1266)DT(0.1266)EAQLT(0.0887)VER;
DALGDSLQVPVSPSSTTSSR	DALGDSLQVPVSPSST[79.9663]TSSR	R	C	372	391	20	2	16T(79.9663)	sp|Q9Y2D5-4|AKAP2_HUMAN	Q9Y2D5-4	AKAP2_HUMAN	AKAP2	Isoform 3 of A-kinase anchor protein 2		sp|Q9Y2D5-5|AKAP2_HUMAN, sp|Q9Y2D5-6|AKAP2_HUMAN, sp|Q9Y2D5-7|AKAP2_HUMAN, sp|Q9Y2D5|AKAP2_HUMAN	1	1.38064832E8	MS/MS	STY:79.9663@DALGDS(0.0046)LQVPVS(0.0378)PS(0.0047)S(0.0047)T(0.2370)T(0.2370)S(0.2370)S(0.2370)R;
DALGDSLQVPVSPSSTTSSR	DALGDSLQVPVS[79.9663]PSSTTSSR	R	C	372	391	20	2	12S(79.9663)	sp|Q9Y2D5-4|AKAP2_HUMAN	Q9Y2D5-4	AKAP2_HUMAN	AKAP2	Isoform 3 of A-kinase anchor protein 2		sp|Q9Y2D5-5|AKAP2_HUMAN, sp|Q9Y2D5-6|AKAP2_HUMAN, sp|Q9Y2D5-7|AKAP2_HUMAN, sp|Q9Y2D5|AKAP2_HUMAN	3	1.38064832E8	MS/MS	STY:79.9663@DALGDS(0.0046)LQVPVS(0.1905)PS(0.1905)S(0.1905)T(0.1905)T(0.1905)S(0.0214)S(0.0214)R;
DALGDSLQVPVSPSSTTSSR	DALGDS[79.9663]LQVPVSPSSTTSSR	R	C	372	391	20	2	6S(79.9663)	sp|Q9Y2D5-4|AKAP2_HUMAN	Q9Y2D5-4	AKAP2_HUMAN	AKAP2	Isoform 3 of A-kinase anchor protein 2		sp|Q9Y2D5-5|AKAP2_HUMAN, sp|Q9Y2D5-6|AKAP2_HUMAN, sp|Q9Y2D5-7|AKAP2_HUMAN, sp|Q9Y2D5|AKAP2_HUMAN	1	0	MS/MS	STY:79.9663@DALGDS(0.9108)LQVPVS(0.0244)PS(0.0108)S(0.0108)T(0.0108)T(0.0108)S(0.0108)S(0.0108)R;
DAPGEDEEEDGVSEAASLEEPK	DAPGEDEEEDGVS[79.9663]EAAS[79.9663]LEEPK	K	E	698	719	22	2,3	13S(79.9663),17S(79.9663)	sp|Q9H0E9-2|BRD8_HUMAN	Q9H0E9-2	BRD8_HUMAN	BRD8	Isoform 2 of Bromodomain-containing protein 8		sp|Q9H0E9-3|BRD8_HUMAN, sp|Q9H0E9-4|BRD8_HUMAN, sp|Q9H0E9|BRD8_HUMAN	2	7.3882896E7	MS/MS	STY:79.9663@DAPGEDEEEDGVS(1.0000)EAAS(1.0000)LEEPK;
DAPTSPASVASSSSTPSSK	DAPTS[79.9663]PASVASSSSTPSSK	K	T	282	300	19	2	5S(79.9663)	sp|Q04726-2|TLE3_HUMAN	Q04726-2	TLE3_HUMAN	TLE3	Isoform 2 of Transducin-like enhancer protein 3		sp|Q04726-3|TLE3_HUMAN, sp|Q04726-4|TLE3_HUMAN, sp|Q04726-5|TLE3_HUMAN, sp|Q04726-6|TLE3_HUMAN, sp|Q04726-7|TLE3_HUMAN, sp|Q04726|TLE3_HUMAN	2	8.4857504E7	MS/MS	STY:79.9663@DAPT(0.0077)S(0.9300)PAS(0.0062)VAS(0.0068)S(0.0068)S(0.0084)S(0.0084)T(0.0084)PS(0.0084)S(0.0087)K;
DAPTSPASVASSSSTPSSK	DAPT[79.9663]SPASVASSSSTPSSK	K	T	282	300	19	2	4T(79.9663)	sp|Q04726-2|TLE3_HUMAN	Q04726-2	TLE3_HUMAN	TLE3	Isoform 2 of Transducin-like enhancer protein 3		sp|Q04726-3|TLE3_HUMAN, sp|Q04726-4|TLE3_HUMAN, sp|Q04726-5|TLE3_HUMAN, sp|Q04726-6|TLE3_HUMAN, sp|Q04726-7|TLE3_HUMAN, sp|Q04726|TLE3_HUMAN	3	8.4857504E7	MS/MS	STY:79.9663@DAPT(0.4738)S(0.4738)PAS(0.0064)VAS(0.0064)S(0.0064)S(0.0064)S(0.0064)T(0.0064)PS(0.0069)S(0.0069)K;
DAPTSPASVASSSSTPSSK	DAPT[79.9663]SPASVASSSSTPSS[79.9663]K	K	T	282	300	19	2	18S(79.9663),4T(79.9663)	sp|Q04726-2|TLE3_HUMAN	Q04726-2	TLE3_HUMAN	TLE3	Isoform 2 of Transducin-like enhancer protein 3		sp|Q04726-3|TLE3_HUMAN, sp|Q04726-4|TLE3_HUMAN, sp|Q04726-5|TLE3_HUMAN, sp|Q04726-6|TLE3_HUMAN, sp|Q04726-7|TLE3_HUMAN, sp|Q04726|TLE3_HUMAN	1	4.085604E7	MS/MS	STY:79.9663@DAPT(0.4363)S(0.0188)PAS(0.0085)VAS(0.2792)S(0.2792)S(0.2792)S(0.2792)T(0.0429)PS(0.0429)S(0.3339)K;
DAPTSPASVASSSSTPSSK	DAPT[79.9663]SPASVASS[79.9663]SSTPSSK	K	T	282	300	19	2	12S(79.9663),4T(79.9663)	sp|Q04726-2|TLE3_HUMAN	Q04726-2	TLE3_HUMAN	TLE3	Isoform 2 of Transducin-like enhancer protein 3		sp|Q04726-3|TLE3_HUMAN, sp|Q04726-4|TLE3_HUMAN, sp|Q04726-5|TLE3_HUMAN, sp|Q04726-6|TLE3_HUMAN, sp|Q04726-7|TLE3_HUMAN, sp|Q04726|TLE3_HUMAN	1	0	MS/MS	STY:79.9663@DAPT(0.3475)S(0.0098)PAS(0.0057)VAS(0.1711)S(0.2443)S(0.2443)S(0.2443)T(0.2443)PS(0.2443)S(0.2443)K;
DAPTSPASVASSSSTPSSK	DAPT[79.9663]S[79.9663]PASVASSSSTPSSK	K	T	282	300	19	2	4T(79.9663),5S(79.9663)	sp|Q04726-2|TLE3_HUMAN	Q04726-2	TLE3_HUMAN	TLE3	Isoform 2 of Transducin-like enhancer protein 3		sp|Q04726-3|TLE3_HUMAN, sp|Q04726-4|TLE3_HUMAN, sp|Q04726-5|TLE3_HUMAN, sp|Q04726-6|TLE3_HUMAN, sp|Q04726-7|TLE3_HUMAN, sp|Q04726|TLE3_HUMAN	1	4.085604E7	MS/MS	STY:79.9663@DAPT(0.2479)S(0.2479)PAS(0.0107)VAS(0.0064)S(0.2479)S(0.2479)S(0.2479)T(0.2479)PS(0.2479)S(0.2479)K;
DASAQQDSYEFVSPSPPADVSER	DASAQQDSYEFVSPSPPADVS[79.9663]ER	K	A	153	175	23	3	21S(79.9663)	sp|Q99728-2|BARD1_HUMAN	Q99728-2	BARD1_HUMAN	BARD1	Isoform alpha of BRCA1-associated RING domain protein 1		sp|Q99728-3|BARD1_HUMAN, sp|Q99728|BARD1_HUMAN	1	1.0214158E7	MS/MS	STY:79.9663@DAS(0.0147)AQQDS(0.0155)Y(0.0155)EFVS(0.0159)PS(0.0169)PPADVS(0.9215)ER;
DASAQQDSYEFVSPSPPADVSER	DASAQQDSYEFVSPS[79.9663]PPADVSER	K	A	153	175	23	3	15S(79.9663)	sp|Q99728-2|BARD1_HUMAN	Q99728-2	BARD1_HUMAN	BARD1	Isoform alpha of BRCA1-associated RING domain protein 1		sp|Q99728-3|BARD1_HUMAN, sp|Q99728|BARD1_HUMAN	1	1.0214158E7	MS/MS	STY:79.9663@DAS(0.0117)AQQDS(0.0117)Y(0.0117)EFVS(0.0125)PS(0.4763)PPADVS(0.4763)ER;
DASAQQDSYEFVSPSPPADVSER	DASAQQDSYEFVS[79.9663]PS[79.9663]PPADVSER	K	A	153	175	23	3	13S(79.9663),15S(79.9663)	sp|Q99728-2|BARD1_HUMAN	Q99728-2	BARD1_HUMAN	BARD1	Isoform alpha of BRCA1-associated RING domain protein 1		sp|Q99728-3|BARD1_HUMAN, sp|Q99728|BARD1_HUMAN	1	2224364	MS/MS	STY:79.9663@DAS(0.2598)AQQDS(0.2598)Y(0.2598)EFVS(0.4069)PS(0.4069)PPADVS(0.4069)ER;
DASDGEDEKPPLPPR	DAS[79.9663]DGEDEKPPLPPR	R	S	130	144	15	2,3	3S(79.9663)	sp|O15357|SHIP2_HUMAN	O15357	SHIP2_HUMAN	INPPL1	Phosphatidylinositol 3,4,5-trisphosphate 5-phosphatase 2			24	3.20257024E8	MS/MS	STY:79.9663@DAS(1.0000)DGEDEKPPLPPR;
DASPINR	DAS[79.9663]PINR	K	W	429	435	7	2	3S(79.9663)	sp|Q13523|PRP4B_HUMAN	Q13523	PRP4B_HUMAN	PRPF4B	Serine/threonine-protein kinase PRP4 homolog			2	9.8429896E7	MS/MS	STY:79.9663@DAS(1.0000)PINR;
DATPPVSPINMEDQER	DAT[79.9663]PPVS[79.9663]PINMEDQER	R	I	253	268	16	2,3	3T(79.9663),7S(79.9663)	sp|P17275|JUNB_HUMAN	P17275	JUNB_HUMAN	JUNB	Transcription factor JunB			6	1.5742656E8	MS/MS	STY:79.9663@DAT(1.0000)PPVS(1.0000)PINMEDQER;
DCDPGSPR	DC[57.0215]DPGS[79.9663]PR	K	R	906	913	8	2	2C(57.0215),6S(79.9663)	sp|Q00341-2|VIGLN_HUMAN	Q00341-2	VIGLN_HUMAN	HDLBP	Isoform 2 of Vigilin		sp|Q00341|VIGLN_HUMAN	2	5.058298E7	MS/MS	STY:79.9663@DCDPGS(1.0000)PR;
DCLIEDSDDEAGQS	DC[57.0215]LIEDSDDEAGQS[79.9663]	R	-	415	428	14	2	14S(79.9663),2C(57.0215)	sp|Q2VPK5-3|CTU2_HUMAN	Q2VPK5-3	CTU2_HUMAN	CTU2	Isoform 2 of Cytoplasmic tRNA 2-thiolation protein 2		sp|Q2VPK5|CTU2_HUMAN	1	3.6919704E7	MS/MS	STY:79.9663@DCLIEDS(0.2326)DDEAGQS(0.7674);
DCLIEDSDDEAGQS	DC[57.0215]LIEDS[79.9663]DDEAGQS	R	-	415	428	14	2	2C(57.0215),7S(79.9663)	sp|Q2VPK5-3|CTU2_HUMAN	Q2VPK5-3	CTU2_HUMAN	CTU2	Isoform 2 of Cytoplasmic tRNA 2-thiolation protein 2		sp|Q2VPK5|CTU2_HUMAN	4	9.8686448E7	MS/MS	STY:79.9663@DCLIEDS(0.9139)DDEAGQS(0.0861);
DCNESTDNDELEDEPEEPFYR	DC[57.0215]NES[79.9663]TDNDELEDEPEEPFY[79.9663]R	K	Y	351	371	21	3	20Y(79.9663),2C(57.0215),5S(79.9663)	sp|Q9Y2K1-2|ZBTB1_HUMAN	Q9Y2K1-2	ZBTB1_HUMAN	ZBTB1	Isoform 2 of Zinc finger and BTB domain-containing protein 1		sp|Q9Y2K1|ZBTB1_HUMAN	1	1.9072248E7	MS/MS	STY:79.9663@DCNES(0.6653)T(0.6653)DNDELEDEPEEPFY(0.6694)R;
DCNESTDNDELEDEPEEPFYR	DC[57.0215]NES[79.9663]T[79.9663]DNDELEDEPEEPFYR	K	Y	351	371	21	3	2C(57.0215),5S(79.9663),6T(79.9663)	sp|Q9Y2K1-2|ZBTB1_HUMAN	Q9Y2K1-2	ZBTB1_HUMAN	ZBTB1	Isoform 2 of Zinc finger and BTB domain-containing protein 1		sp|Q9Y2K1|ZBTB1_HUMAN	2	1.9072248E7	MS/MS	STY:79.9663@DCNES(0.9431)T(0.9431)DNDELEDEPEEPFY(0.1138)R;
DCPPDPVGPSPQDPSLEASGPSPK	DC[57.0215]PPDPVGPSPQDPSLEASGPS[79.9663]PK	K	P	736	759	24	3	22S(79.9663),2C(57.0215)	sp|Q8IX01|SUGP2_HUMAN	Q8IX01	SUGP2_HUMAN	SUGP2	SURP and G-patch domain-containing protein 2		sp|Q8IX01-3|SUGP2_HUMAN, sp|Q8IX01-4|SUGP2_HUMAN	1	0	MS/MS	STY:79.9663@DCPPDPVGPS(0.1198)PQDPS(0.0245)LEAS(0.0340)GPS(0.8217)PK;
DCPPDPVGPSPQDPSLEASGPSPK	DC[57.0215]PPDPVGPSPQDPSLEAS[79.9663]GPSPK	K	P	736	759	24	3	19S(79.9663),2C(57.0215)	sp|Q8IX01|SUGP2_HUMAN	Q8IX01	SUGP2_HUMAN	SUGP2	SURP and G-patch domain-containing protein 2		sp|Q8IX01-3|SUGP2_HUMAN, sp|Q8IX01-4|SUGP2_HUMAN	3	6.0952704E7	MS/MS	STY:79.9663@DCPPDPVGPS(0.0180)PQDPS(0.0182)LEAS(0.9143)GPS(0.0495)PK;
DCPPDPVGPSPQDPSLEASGPSPK	DC[57.0215]PPDPVGPSPQDPS[79.9663]LEASGPSPK	K	P	736	759	24	3	15S(79.9663),2C(57.0215)	sp|Q8IX01|SUGP2_HUMAN	Q8IX01	SUGP2_HUMAN	SUGP2	SURP and G-patch domain-containing protein 2		sp|Q8IX01-3|SUGP2_HUMAN, sp|Q8IX01-4|SUGP2_HUMAN	1	2.5616062E7	MS/MS	STY:79.9663@DCPPDPVGPS(0.0857)PQDPS(0.4411)LEAS(0.0341)GPS(0.4391)PK;
DCPPDPVGPSPQDPSLEASGPSPK	DC[57.0215]PPDPVGPS[79.9663]PQDPSLEASGPSPK	K	P	736	759	24	3	10S(79.9663),2C(57.0215)	sp|Q8IX01|SUGP2_HUMAN	Q8IX01	SUGP2_HUMAN	SUGP2	SURP and G-patch domain-containing protein 2		sp|Q8IX01-3|SUGP2_HUMAN, sp|Q8IX01-4|SUGP2_HUMAN	1	2.5616062E7	MS/MS	STY:79.9663@DCPPDPVGPS(0.5372)PQDPS(0.1543)LEAS(0.1543)GPS(0.1543)PK;
DCSPSSPLK	DC[57.0215]SPSS[79.9663]PLK	K	L	1903	1911	9	2	2C(57.0215),6S(79.9663)	sp|Q9Y485|DMXL1_HUMAN	Q9Y485	DMXL1_HUMAN	DMXL1	DmX-like protein 1			1	1.1643419E7	MS/MS	STY:79.9663@DCS(0.0303)PS(0.0383)S(0.9314)PLK;
DCSPSSPLK	DC[57.0215]S[79.9663]PSSPLK	K	L	1903	1911	9	2	2C(57.0215),3S(79.9663)	sp|Q9Y485|DMXL1_HUMAN	Q9Y485	DMXL1_HUMAN	DMXL1	DmX-like protein 1			1	1.1643419E7	MS/MS	STY:79.9663@DCS(0.3333)PS(0.3333)S(0.3333)PLK;
DDAEESSSEPEEENVGNDTK	DDAEESS[79.9663]S[79.9663]EPEEENVGNDTK	R	A	575	594	20	2	7S(79.9663),8S(79.9663)	sp|Q13823|NOG2_HUMAN	Q13823	NOG2_HUMAN	GNL2	Nucleolar GTP-binding protein 2			2	3.98173568E8	MS/MS	STY:79.9663@DDAEES(0.0736)S(0.8756)S(0.8756)EPEEENVGNDT(0.1751)K;
DDAEESSSEPEEENVGNDTK	DDAEESS[79.9663]S[79.9663]EPEEENVGNDT[79.9663]K	R	A	575	594	20	2	19T(79.9663),7S(79.9663),8S(79.9663)	sp|Q13823|NOG2_HUMAN	Q13823	NOG2_HUMAN	GNL2	Nucleolar GTP-binding protein 2			1	0	MS/MS	STY:79.9663@DDAEES(0.4723)S(0.8444)S(0.8461)EPEEENVGNDT(0.8371)K;
DDAEESSSEPEEENVGNDTK	DDAEES[79.9663]SSEPEEENVGNDT[79.9663]K	R	A	575	594	20	2	19T(79.9663),6S(79.9663)	sp|Q13823|NOG2_HUMAN	Q13823	NOG2_HUMAN	GNL2	Nucleolar GTP-binding protein 2			2	3.98173568E8	MS/MS	STY:79.9663@DDAEES(0.8768)S(0.1237)S(0.1237)EPEEENVGNDT(0.8757)K;
DDAEESSSEPEEENVGNDTK	DDAEES[79.9663]S[79.9663]SEPEEENVGNDTK	R	A	575	594	20	2,3	6S(79.9663),7S(79.9663)	sp|Q13823|NOG2_HUMAN	Q13823	NOG2_HUMAN	GNL2	Nucleolar GTP-binding protein 2			8	4.4246608E8	MS/MS	STY:79.9663@DDAEES(0.7146)S(0.7146)S(0.1096)EPEEENVGNDT(0.4613)K;
DDAEESSSEPEEENVGNDTK	DDAEES[79.9663]S[79.9663]S[79.9663]EPEEENVGNDTK	R	A	575	594	20	2	6S(79.9663),7S(79.9663),8S(79.9663)	sp|Q13823|NOG2_HUMAN	Q13823	NOG2_HUMAN	GNL2	Nucleolar GTP-binding protein 2			7	8.0593832E7	MS/MS	STY:79.9663@DDAEES(0.9511)S(0.9511)S(0.9511)EPEEENVGNDT(0.1466)K;
DDDDIDLFGSDDEEESEEAK	DDDDIDLFGSDDEEES[79.9663]EEAK	K	R	97	116	20	2,3	16S(79.9663)	sp|P24534|EF1B_HUMAN	P24534	EF1B_HUMAN	EEF1B2	Elongation factor 1-beta			34	2.19904041E10	MS/MS	STY:79.9663@DDDDIDLFGS(0.0545)DDEEES(0.9455)EEAK;
DDDDIDLFGSDDEEESEEAK	DDDDIDLFGS[79.9663]DDEEESEEAK	K	R	97	116	20	2,3	10S(79.9663)	sp|P24534|EF1B_HUMAN	P24534	EF1B_HUMAN	EEF1B2	Elongation factor 1-beta			165	2.22842081E10	MS/MS	STY:79.9663@DDDDIDLFGS(0.9469)DDEEES(0.0531)EEAK;
DDDDSIADFLNSDEEEDR	DDDDSIADFLNS[79.9663]DEEEDR	K	V	69	86	18	2,3	12S(79.9663)	sp|Q15649-2|ZNHI3_HUMAN	Q15649-2	ZNHI3_HUMAN	ZNHIT3	Isoform 2 of Zinc finger HIT domain-containing protein 3		sp|Q15649|ZNHI3_HUMAN	4	1.03780672E8	MS/MS	STY:79.9663@DDDDS(0.0558)IADFLNS(0.9442)DEEEDR;
DDDETEEDNNQDEYDPMEAEEAEDEEDDRDEEEMTK	DDDET[79.9663]EEDNNQDEYDPMEAEEAEDEEDDRDEEEMTK	K	R	842	877	36	3,4	5T(79.9663)	sp|Q8IX12-2|CCAR1_HUMAN	Q8IX12-2	CCAR1_HUMAN	CCAR1	Isoform 2 of Cell division cycle and apoptosis regulator protein 1		sp|Q8IX12|CCAR1_HUMAN	5	6.49556E7	MS/MS	STY:79.9663@DDDET(0.4878)EEDNNQDEY(0.4878)DPMEAEEAEDEEDDRDEEEMT(0.0243)K;
DDDLVEFSDLESEDDERPR	DDDLVEFS[79.9663]DLES[79.9663]EDDERPR	K	S	1134	1152	19	3	12S(79.9663),8S(79.9663)	sp|Q9HCK8-2|CHD8_HUMAN	Q9HCK8-2	CHD8_HUMAN	CHD8	Isoform 2 of Chromodomain-helicase-DNA-binding protein 8		sp|Q9HCK8|CHD8_HUMAN	5	8.6742024E7	MS/MS	STY:79.9663@DDDLVEFS(1.0000)DLES(1.0000)EDDERPR;
DDDSDDESQSSHTGK	DDDSDDESQSSHT[79.9663]GK	K	K	390	404	15	2	13T(79.9663)	sp|O94874-2|UFL1_HUMAN	O94874-2	UFL1_HUMAN	UFL1	Isoform 2 of E3 UFM1-protein ligase 1		sp|O94874-3|UFL1_HUMAN, sp|O94874|UFL1_HUMAN	1	1.69838304E8	MS/MS	STY:79.9663@DDDS(0.3173)DDES(0.0263)QS(0.0127)S(0.0127)HT(0.6311)GK;
DDDSDDESQSSHTGK	DDDSDDESQSS[79.9663]HTGK	K	K	390	404	15	2	11S(79.9663)	sp|O94874-2|UFL1_HUMAN	O94874-2	UFL1_HUMAN	UFL1	Isoform 2 of E3 UFM1-protein ligase 1		sp|O94874-3|UFL1_HUMAN, sp|O94874|UFL1_HUMAN	1	1.13235272E8	MS/MS	STY:79.9663@DDDS(0.0206)DDES(0.0119)QS(0.0121)S(0.4777)HT(0.4777)GK;
DDDSDDESQSSHTGK	DDDSDDESQS[79.9663]SHTGK	K	K	390	404	15	2	10S(79.9663)	sp|O94874-2|UFL1_HUMAN	O94874-2	UFL1_HUMAN	UFL1	Isoform 2 of E3 UFM1-protein ligase 1		sp|O94874-3|UFL1_HUMAN, sp|O94874|UFL1_HUMAN	1	1.69838304E8	MS/MS	STY:79.9663@DDDS(0.0319)DDES(0.0514)QS(0.8825)S(0.0174)HT(0.0169)GK;
DDDSDDESQSSHTGK	DDDSDDES[79.9663]QSSHTGK	K	K	390	404	15	2	8S(79.9663)	sp|O94874-2|UFL1_HUMAN	O94874-2	UFL1_HUMAN	UFL1	Isoform 2 of E3 UFM1-protein ligase 1		sp|O94874-3|UFL1_HUMAN, sp|O94874|UFL1_HUMAN	1	1.13235272E8	MS/MS	STY:79.9663@DDDS(0.0093)DDES(0.2477)QS(0.2477)S(0.2477)HT(0.2477)GK;
DDDSDTETSNDLPK	DDDSDTET[79.9663]SNDLPK	K	F	57	70	14	2	8T(79.9663)	sp|Q9UID6|ZN639_HUMAN	Q9UID6	ZN639_HUMAN	ZNF639	Zinc finger protein 639			1	0	MS/MS	STY:79.9663@DDDS(0.2370)DT(0.0113)ET(0.3759)S(0.3759)NDLPK;
DDDSDTETSNDLPK	DDDSDT[79.9663]ETSNDLPK	K	F	57	70	14	2	6T(79.9663)	sp|Q9UID6|ZN639_HUMAN	Q9UID6	ZN639_HUMAN	ZNF639	Zinc finger protein 639			1	0	MS/MS	STY:79.9663@DDDS(0.0287)DT(0.9342)ET(0.0186)S(0.0185)NDLPK;
DDDSGDHDQNEENSTQK	DDDSGDHDQNEENS[79.9663]TQK	K	D	10	26	17	2	14S(79.9663)	sp|O60573-2|IF4E2_HUMAN	O60573-2	IF4E2_HUMAN	EIF4E2	Isoform 2 of Eukaryotic translation initiation factor 4E type 2		sp|O60573|IF4E2_HUMAN	1	0	MS/MS	STY:79.9663@DDDS(0.1037)GDHDQNEENS(0.4482)T(0.4482)QK;
DDDSDDESQSSHTGK	DDDS[79.9663]DDESQSSHTGK	K	K	390	404	15	2,3	4S(79.9663)	sp|O94874-2|UFL1_HUMAN	O94874-2	UFL1_HUMAN	UFL1	Isoform 2 of E3 UFM1-protein ligase 1		sp|O94874-3|UFL1_HUMAN, sp|O94874|UFL1_HUMAN	5	3.14538688E8	MS/MS	STY:79.9663@DDDS(0.9225)DDES(0.0217)QS(0.0217)S(0.0171)HT(0.0170)GK;
DDDSDLILNDGDISLTYGDSTVNTEPATSSAPR	DDDS[79.9663]DLILNDGDISLTYGDSTVNTEPATSSAPR	K	R	586	618	33	3	4S(79.9663)	sp|Q92581-1|SL9A6_HUMAN	Q92581-1	SL9A6_HUMAN	SLC9A6	Isoform 1 of Sodium/hydrogen exchanger 6		sp|Q92581-3|SL9A6_HUMAN, sp|Q92581|SL9A6_HUMAN	1	0	MS/MS	STY:79.9663@DDDS(0.5709)DLILNDGDIS(0.0092)LT(0.0079)Y(0.0079)GDS(0.0437)T(0.0437)VNT(0.0437)EPAT(0.0910)S(0.0910)S(0.0910)APR;
DDDSDLILNDGDISLTYGDSTVNTEPATSSAPR	DDDS[79.9663]DLILNDGDISLT[79.9663]YGDSTVNTEPATSSAPR	K	R	586	618	33	3	16T(79.9663),4S(79.9663)	sp|Q92581-1|SL9A6_HUMAN	Q92581-1	SL9A6_HUMAN	SLC9A6	Isoform 1 of Sodium/hydrogen exchanger 6		sp|Q92581-3|SL9A6_HUMAN, sp|Q92581|SL9A6_HUMAN	1	5.1436392E7	MS/MS	STY:79.9663@DDDS(0.6848)DLILNDGDIS(0.5416)LT(0.5643)Y(0.0630)GDS(0.0158)T(0.0158)VNT(0.0347)EPAT(0.0398)S(0.0206)S(0.0195)APR;
DDDSDTETSNDLPK	DDDS[79.9663]DTETSNDLPK	K	F	57	70	14	2	4S(79.9663)	sp|Q9UID6|ZN639_HUMAN	Q9UID6	ZN639_HUMAN	ZNF639	Zinc finger protein 639			1	2.0070938E7	MS/MS	STY:79.9663@DDDS(0.9406)DT(0.0204)ET(0.0204)S(0.0186)NDLPK;
DDECESDAENEQNHDPNVEEFLQQQDTAVIFPEAPEEDQR	DDEC[57.0215]ES[79.9663]DAENEQNHDPNVEEFLQQQDTAVIFPEAPEEDQR	K	Q	110	149	40	4	4C(57.0215),6S(79.9663)	sp|P37275-2|ZEB1_HUMAN	P37275-2	ZEB1_HUMAN	ZEB1	Isoform 2 of Zinc finger E-box-binding homeobox 1		sp|P37275-3|ZEB1_HUMAN, sp|P37275-4|ZEB1_HUMAN, sp|P37275-5|ZEB1_HUMAN, sp|P37275|ZEB1_HUMAN	2	0	MS/MS	STY:79.9663@DDECES(0.8545)DAENEQNHDPNVEEFLQQQDT(0.1455)AVIFPEAPEEDQR;
DDEDEEEEEEVSDS	DDEDEEEEEEVS[79.9663]DS	K	-	383	396	14	2	12S(79.9663)	sp|Q8TAD8|SNIP1_HUMAN	Q8TAD8	SNIP1_HUMAN	SNIP1	Smad nuclear-interacting protein 1			6	6.5333164E7	MS/MS	STY:79.9663@DDEDEEEEEEVS(0.9298)DS(0.0702);
DDEEKPKIEDVGSDEEDDSGK	DDEEKPKIEDVGSDEEDDS[79.9663]GK	K	D	243	263	21	3	19S(79.9663)	sp|P08238|HS90B_HUMAN	P08238	HS90B_HUMAN	HSP90AB1	Heat shock protein HSP 90-beta	HSP90AB2P	sp|Q58FF8|H90B2_HUMAN	1	0	MS/MS	STY:79.9663@DDEEKPKIEDVGS(0.0751)DEEDDS(0.9249)GK;
DDEEKPKIEDVGSDEEDDSGK	DDEEKPKIEDVGS[79.9663]DEEDDSGK	K	D	243	263	21	3	13S(79.9663)	sp|P08238|HS90B_HUMAN	P08238	HS90B_HUMAN	HSP90AB1	Heat shock protein HSP 90-beta	HSP90AB2P	sp|Q58FF8|H90B2_HUMAN	1	2.0073452E7	MS/MS	STY:79.9663@DDEEKPKIEDVGS(0.7165)DEEDDS(0.2835)GK;
DDFESEEEDVK	DDFES[79.9663]EEEDVK	K	S	1290	1300	11	2	5S(79.9663)	sp|Q7Z6E9-2|RBBP6_HUMAN	Q7Z6E9-2	RBBP6_HUMAN	RBBP6	Isoform 2 of E3 ubiquitin-protein ligase RBBP6		sp|Q7Z6E9-4|RBBP6_HUMAN, sp|Q7Z6E9|RBBP6_HUMAN	5	9.7468088E7	MS/MS	STY:79.9663@DDFES(1.0000)EEEDVK;
DDGDEEGLLTHSEEELEHSQDTDADDGALQ	DDGDEEGLLTHSEEELEHSQDT[79.9663]DADDGALQ	R	-	261	290	30	3	22T(79.9663)	sp|Q9UKM9-2|RALY_HUMAN	Q9UKM9-2	RALY_HUMAN	RALY	Isoform 1 of RNA-binding protein Raly		sp|Q9UKM9|RALY_HUMAN	4	1.08678515E9	MS/MS	STY:79.9663@DDGDEEGLLT(0.0314)HS(0.0203)EEELEHS(0.0240)QDT(0.9243)DADDGALQ;
DDGDEEGLLTHSEEELEHSQDTDADDGALQ	DDGDEEGLLTHSEEELEHS[79.9663]QDTDADDGALQ	R	-	261	290	30	3	19S(79.9663)	sp|Q9UKM9-2|RALY_HUMAN	Q9UKM9-2	RALY_HUMAN	RALY	Isoform 1 of RNA-binding protein Raly		sp|Q9UKM9|RALY_HUMAN	2	0	MS/MS	STY:79.9663@DDGDEEGLLT(0.1248)HS(0.1248)EEELEHS(0.7309)QDT(0.0195)DADDGALQ;
DDGDEEGLLTHSEEELEHSQDTDADDGALQ	DDGDEEGLLTHSEEELEHS[79.9663]QDT[79.9663]DADDGALQ	R	-	261	290	30	3	19S(79.9663),22T(79.9663)	sp|Q9UKM9-2|RALY_HUMAN	Q9UKM9-2	RALY_HUMAN	RALY	Isoform 1 of RNA-binding protein Raly		sp|Q9UKM9|RALY_HUMAN	12	7.8316979E8	MS/MS	STY:79.9663@DDGDEEGLLT(0.1364)HS(0.1364)EEELEHS(0.8693)QDT(0.8579)DADDGALQ;
DDGDEEGLLTHSEEELEHSQDTDADDGALQ	DDGDEEGLLTHS[79.9663]EEELEHSQDTDADDGALQ	R	-	261	290	30	3	12S(79.9663)	sp|Q9UKM9-2|RALY_HUMAN	Q9UKM9-2	RALY_HUMAN	RALY	Isoform 1 of RNA-binding protein Raly		sp|Q9UKM9|RALY_HUMAN	1	0	MS/MS	STY:79.9663@DDGDEEGLLT(0.2517)HS(0.6930)EEELEHS(0.0396)QDT(0.0157)DADDGALQ;
DDGDEEGLLTHSEEELEHSQDTDADDGALQ	DDGDEEGLLTHS[79.9663]EEELEHSQDT[79.9663]DADDGALQ	R	-	261	290	30	3	12S(79.9663),22T(79.9663)	sp|Q9UKM9-2|RALY_HUMAN	Q9UKM9-2	RALY_HUMAN	RALY	Isoform 1 of RNA-binding protein Raly		sp|Q9UKM9|RALY_HUMAN	4	3.15348672E8	MS/MS	STY:79.9663@DDGDEEGLLT(0.0485)HS(0.7019)EEELEHS(0.5883)QDT(0.6613)DADDGALQ;
DDGDEEGLLTHSEEELEHSQDTDADDGALQ	DDGDEEGLLTHS[79.9663]EEELEHS[79.9663]QDTDADDGALQ	R	-	261	290	30	3	12S(79.9663),19S(79.9663)	sp|Q9UKM9-2|RALY_HUMAN	Q9UKM9-2	RALY_HUMAN	RALY	Isoform 1 of RNA-binding protein Raly		sp|Q9UKM9|RALY_HUMAN	6	6.0536762E8	MS/MS	STY:79.9663@DDGDEEGLLT(0.0606)HS(0.9394)EEELEHS(0.9394)QDT(0.0607)DADDGALQ;
DDGDEEGLLTHSEEELEHSQDTDADDGALQ	DDGDEEGLLTHS[79.9663]EEELEHS[79.9663]QDT[79.9663]DADDGALQ	R	-	261	290	30	3	12S(79.9663),19S(79.9663),22T(79.9663)	sp|Q9UKM9-2|RALY_HUMAN	Q9UKM9-2	RALY_HUMAN	RALY	Isoform 1 of RNA-binding protein Raly		sp|Q9UKM9|RALY_HUMAN	3	3.87291232E8	MS/MS	STY:79.9663@DDGDEEGLLT(0.2092)HS(0.9313)EEELEHS(0.9297)QDT(0.9297)DADDGALQ;
DDGDEEGLLTHSEEELEHSQDTDADDGALQ	DDGDEEGLLT[79.9663]HSEEELEHSQDTDADDGALQ	R	-	261	290	30	3	10T(79.9663)	sp|Q9UKM9-2|RALY_HUMAN	Q9UKM9-2	RALY_HUMAN	RALY	Isoform 1 of RNA-binding protein Raly		sp|Q9UKM9|RALY_HUMAN	6	1.08678515E9	MS/MS	STY:79.9663@DDGDEEGLLT(0.8270)HS(0.0164)EEELEHS(0.0725)QDT(0.0841)DADDGALQ;
DDGDEEGLLTHSEEELEHSQDTDADDGALQ	DDGDEEGLLT[79.9663]HSEEELEHSQDT[79.9663]DADDGALQ	R	-	261	290	30	3	10T(79.9663),22T(79.9663)	sp|Q9UKM9-2|RALY_HUMAN	Q9UKM9-2	RALY_HUMAN	RALY	Isoform 1 of RNA-binding protein Raly		sp|Q9UKM9|RALY_HUMAN	1	3.15348672E8	MS/MS	STY:79.9663@DDGDEEGLLT(0.7338)HS(0.0656)EEELEHS(0.4663)QDT(0.7344)DADDGALQ;
DDGDEEGLLTHSEEELEHSQDTDADDGALQ	DDGDEEGLLT[79.9663]HSEEELEHS[79.9663]QDTDADDGALQ	R	-	261	290	30	3	10T(79.9663),19S(79.9663)	sp|Q9UKM9-2|RALY_HUMAN	Q9UKM9-2	RALY_HUMAN	RALY	Isoform 1 of RNA-binding protein Raly		sp|Q9UKM9|RALY_HUMAN	3	5.5233139E8	MS/MS	STY:79.9663@DDGDEEGLLT(0.6330)HS(0.0497)EEELEHS(0.6954)QDT(0.6218)DADDGALQ;
DDGDEEGLLTHSEEELEHSQDTDADDGALQ	DDGDEEGLLT[79.9663]HSEEELEHS[79.9663]QDT[79.9663]DADDGALQ	R	-	261	290	30	3	10T(79.9663),19S(79.9663),22T(79.9663)	sp|Q9UKM9-2|RALY_HUMAN	Q9UKM9-2	RALY_HUMAN	RALY	Isoform 1 of RNA-binding protein Raly		sp|Q9UKM9|RALY_HUMAN	5	1.99051968E8	MS/MS	STY:79.9663@DDGDEEGLLT(0.7647)HS(0.7312)EEELEHS(0.7604)QDT(0.7438)DADDGALQ;
DDGDEEGLLTHSEEELEHSQDTDADDGALQ	DDGDEEGLLT[79.9663]HS[79.9663]EEELEHSQDTDADDGALQ	R	-	261	290	30	3	10T(79.9663),12S(79.9663)	sp|Q9UKM9-2|RALY_HUMAN	Q9UKM9-2	RALY_HUMAN	RALY	Isoform 1 of RNA-binding protein Raly		sp|Q9UKM9|RALY_HUMAN	5	3.60281504E8	MS/MS	STY:79.9663@DDGDEEGLLT(0.9199)HS(0.9199)EEELEHS(0.0853)QDT(0.0749)DADDGALQ;
DDGDEEGLLTHSEEELEHSQDTDADDGALQ	DDGDEEGLLT[79.9663]HS[79.9663]EEELEHSQDT[79.9663]DADDGALQ	R	-	261	290	30	3	10T(79.9663),12S(79.9663),22T(79.9663)	sp|Q9UKM9-2|RALY_HUMAN	Q9UKM9-2	RALY_HUMAN	RALY	Isoform 1 of RNA-binding protein Raly		sp|Q9UKM9|RALY_HUMAN	2	2.01038416E8	MS/MS	STY:79.9663@DDGDEEGLLT(0.8149)HS(0.8146)EEELEHS(0.5572)QDT(0.8134)DADDGALQ;
DDGDEEGLLTHSEEELEHSQDTDADDGALQ	DDGDEEGLLT[79.9663]HS[79.9663]EEELEHS[79.9663]QDTDADDGALQ	R	-	261	290	30	3	10T(79.9663),12S(79.9663),19S(79.9663)	sp|Q9UKM9-2|RALY_HUMAN	Q9UKM9-2	RALY_HUMAN	RALY	Isoform 1 of RNA-binding protein Raly		sp|Q9UKM9|RALY_HUMAN	6	2.61126672E8	MS/MS	STY:79.9663@DDGDEEGLLT(0.9441)HS(0.9439)EEELEHS(0.9445)QDT(0.1676)DADDGALQ;
DDGSDRDSDREQDEK	DDGS[79.9663]DRDS[79.9663]DREQDEK	K	Q	590	604	15	2	4S(79.9663),8S(79.9663)	sp|Q9UGP8|SEC63_HUMAN	Q9UGP8	SEC63_HUMAN	SEC63	Translocation protein SEC63 homolog			1	1.30699696E8	MS/MS	STY:79.9663@DDGS(1.0000)DRDS(1.0000)DREQDEK;
DDGVFVQEVTQNSPAAR	DDGVFVQEVTQNS[79.9663]PAAR	R	T	29	45	17	3	13S(79.9663)	sp|Q09666|AHNK_HUMAN	Q09666	AHNK_HUMAN	AHNAK	Neuroblast differentiation-associated protein AHNAK		sp|Q09666-2|AHNK_HUMAN	1	4.04294e+06	MS/MS	STY:79.9663@DDGVFVQEVT(0.0711)QNS(0.9289)PAAR;
DDISEIQSLASDHSGR	DDISEIQSLAS[79.9663]DHS[79.9663]GR	R	S	287	302	16	2,3	11S(79.9663),14S(79.9663)	sp|Q07157-2|ZO1_HUMAN	Q07157-2	ZO1_HUMAN	TJP1	Isoform Short of Tight junction protein ZO-1		sp|Q07157|ZO1_HUMAN	3	1.10428912E8	MS/MS	STY:79.9663@DDIS(0.0556)EIQS(0.0580)LAS(0.9432)DHS(0.9432)GR;
DDISEIQSLASDHSGR	DDISEIQS[79.9663]LASDHS[79.9663]GR	R	S	287	302	16	2	14S(79.9663),8S(79.9663)	sp|Q07157-2|ZO1_HUMAN	Q07157-2	ZO1_HUMAN	TJP1	Isoform Short of Tight junction protein ZO-1		sp|Q07157|ZO1_HUMAN	1	8.7481504E7	MS/MS	STY:79.9663@DDIS(0.0569)EIQS(0.9385)LAS(0.0658)DHS(0.9389)GR;
DDISEIQSLASDHSGR	DDISEIQS[79.9663]LAS[79.9663]DHSGR	R	S	287	302	16	3	11S(79.9663),8S(79.9663)	sp|Q07157-2|ZO1_HUMAN	Q07157-2	ZO1_HUMAN	TJP1	Isoform Short of Tight junction protein ZO-1		sp|Q07157|ZO1_HUMAN	1	0	MS/MS	STY:79.9663@DDIS(0.6215)EIQS(0.6804)LAS(0.6432)DHS(0.0549)GR;
DDISEIQSLASDHSGR	DDIS[79.9663]EIQS[79.9663]LASDHSGR	R	S	287	302	16	3	4S(79.9663),8S(79.9663)	sp|Q07157-2|ZO1_HUMAN	Q07157-2	ZO1_HUMAN	TJP1	Isoform Short of Tight junction protein ZO-1		sp|Q07157|ZO1_HUMAN	1	2.2858146E7	MS/MS	STY:79.9663@DDIS(0.9416)EIQS(0.9416)LAS(0.0589)DHS(0.0580)GR;
DDISEIQSLASDHSGR	DDIS[79.9663]EIQS[79.9663]LASDHS[79.9663]GR	R	S	287	302	16	3	14S(79.9663),4S(79.9663),8S(79.9663)	sp|Q07157-2|ZO1_HUMAN	Q07157-2	ZO1_HUMAN	TJP1	Isoform Short of Tight junction protein ZO-1		sp|Q07157|ZO1_HUMAN	1	7.70954e+06	MS/MS	STY:79.9663@DDIS(0.7437)EIQS(0.7437)LAS(0.7437)DHS(0.7688)GR;
DDNEDNSNDGTQPSK	DDNEDNS[79.9663]NDGTQPSK	K	R	30	44	15	2	7S(79.9663)	sp|Q8WUB8-2|PHF10_HUMAN	Q8WUB8-2	PHF10_HUMAN	PHF10	Isoform 2 of PHD finger protein 10		sp|Q8WUB8|PHF10_HUMAN	3	1.23237336E8	MS/MS	STY:79.9663@DDNEDNS(0.9377)NDGT(0.0312)QPS(0.0312)K;
DDPPTHSQPDSDDEAEEIQWSDDENTATLTAPEFPEFATK	DDPPTHSQPDSDDEAEEIQWSDDENT[79.9663]AT[79.9663]LTAPEFPEFATK	R	V	50	89	40	4	26T(79.9663),28T(79.9663)	sp|O75794|CD123_HUMAN	O75794	CD123_HUMAN	CDC123	Cell division cycle protein 123 homolog			1	0	MS/MS	STY:79.9663@DDPPT(0.0950)HS(0.0519)QPDS(0.0429)DDEAEEIQWS(0.0165)DDENT(0.5072)AT(0.4753)LT(0.3623)APEFPEFAT(0.4488)K;
DDPPTHSQPDSDDEAEEIQWSDDENTATLTAPEFPEFATK	DDPPTHSQPDSDDEAEEIQWS[79.9663]DDENTATLTAPEFPEFATK	R	V	50	89	40	4	21S(79.9663)	sp|O75794|CD123_HUMAN	O75794	CD123_HUMAN	CDC123	Cell division cycle protein 123 homolog			1	4.842312E7	MS/MS	STY:79.9663@DDPPT(0.0464)HS(0.0636)QPDS(0.0219)DDEAEEIQWS(0.7583)DDENT(0.0069)AT(0.0401)LT(0.0510)APEFPEFAT(0.0117)K;
DDPPTHSQPDSDDEAEEIQWSDDENTATLTAPEFPEFATK	DDPPTHSQPDSDDEAEEIQWS[79.9663]DDENT[79.9663]ATLTAPEFPEFATK	R	V	50	89	40	4	21S(79.9663),26T(79.9663)	sp|O75794|CD123_HUMAN	O75794	CD123_HUMAN	CDC123	Cell division cycle protein 123 homolog			3	5.07891392E8	MS/MS	STY:79.9663@DDPPT(0.1233)HS(0.0630)QPDS(0.3985)DDEAEEIQWS(0.6743)DDENT(0.6743)AT(0.0294)LT(0.0161)APEFPEFAT(0.0209)K;
DDPPTHSQPDSDDEAEEIQWSDDENTATLTAPEFPEFATK	DDPPTHSQPDS[79.9663]DDEAEEIQWSDDENTAT[79.9663]LTAPEFPEFATK	R	V	50	89	40	4	11S(79.9663),28T(79.9663)	sp|O75794|CD123_HUMAN	O75794	CD123_HUMAN	CDC123	Cell division cycle protein 123 homolog			1	8.2817744E7	MS/MS	STY:79.9663@DDPPT(0.0197)HS(0.0144)QPDS(0.6046)DDEAEEIQWS(0.2968)DDENT(0.0202)AT(0.5008)LT(0.5008)APEFPEFAT(0.0427)K;
DDPPTHSQPDSDDEAEEIQWSDDENTATLTAPEFPEFATK	DDPPTHSQPDS[79.9663]DDEAEEIQWSDDENT[79.9663]ATLTAPEFPEFATK	R	V	50	89	40	4	11S(79.9663),26T(79.9663)	sp|O75794|CD123_HUMAN	O75794	CD123_HUMAN	CDC123	Cell division cycle protein 123 homolog			1	4.22375552E8	MS/MS	STY:79.9663@DDPPT(0.0889)HS(0.1058)QPDS(0.7763)DDEAEEIQWS(0.0183)DDENT(0.9009)AT(0.0434)LT(0.0476)APEFPEFAT(0.0187)K;
DDPPTHSQPDSDDEAEEIQWSDDENTATLTAPEFPEFATK	DDPPT[79.9663]HSQPDSDDEAEEIQWSDDENTATLT[79.9663]APEFPEFATK	R	V	50	89	40	4	30T(79.9663),5T(79.9663)	sp|O75794|CD123_HUMAN	O75794	CD123_HUMAN	CDC123	Cell division cycle protein 123 homolog			2	5.0519328E8	MS/MS	STY:79.9663@DDPPT(0.8910)HS(0.0308)QPDS(0.0308)DDEAEEIQWS(0.0855)DDENT(0.0259)AT(0.0259)LT(0.8922)APEFPEFAT(0.0178)K;
DDPPTHSQPDSDDEAEEIQWSDDENTATLTAPEFPEFATK	DDPPT[79.9663]HSQPDS[79.9663]DDEAEEIQWSDDENTATLTAPEFPEFATK	R	V	50	89	40	4	11S(79.9663),5T(79.9663)	sp|O75794|CD123_HUMAN	O75794	CD123_HUMAN	CDC123	Cell division cycle protein 123 homolog			2	4.25073632E8	MS/MS	STY:79.9663@DDPPT(0.7212)HS(0.0598)QPDS(0.7124)DDEAEEIQWS(0.1058)DDENT(0.0987)AT(0.0987)LT(0.0933)APEFPEFAT(0.1100)K;
DDPPTHSQPDSDDEAEEIQWSDDENTATLTAPEFPEFATK	DDPPT[79.9663]HS[79.9663]QPDSDDEAEEIQWSDDENTATLTAPEFPEFATK	R	V	50	89	40	4	5T(79.9663),7S(79.9663)	sp|O75794|CD123_HUMAN	O75794	CD123_HUMAN	CDC123	Cell division cycle protein 123 homolog			1	0	MS/MS	STY:79.9663@DDPPT(0.6953)HS(0.6953)QPDS(0.0143)DDEAEEIQWS(0.1063)DDENT(0.0633)AT(0.0722)LT(0.1509)APEFPEFAT(0.2024)K;
DDPSDVTDEDEGPAEPPPPPK	DDPS[79.9663]DVTDEDEGPAEPPPPPK	R	L	594	614	21	3	4S(79.9663)	sp|Q3YEC7-2|RABL6_HUMAN	Q3YEC7-2	RABL6_HUMAN	RABL6	Isoform 2 of Rab-like protein 6		sp|Q3YEC7|RABL6_HUMAN	1	1.304114E7	MS/MS	STY:79.9663@DDPS(0.5000)DVT(0.5000)DEDEGPAEPPPPPK;
DDPSDVTDEDEGPAEPPPPPK	DDPS[79.9663]DVT[79.9663]DEDEGPAEPPPPPK	R	L	594	614	21	2,3	4S(79.9663),7T(79.9663)	sp|Q3YEC7-2|RABL6_HUMAN	Q3YEC7-2	RABL6_HUMAN	RABL6	Isoform 2 of Rab-like protein 6		sp|Q3YEC7|RABL6_HUMAN	6	1.04087704E8	MS/MS	STY:79.9663@DDPS(1.0000)DVT(1.0000)DEDEGPAEPPPPPK;
DDQEWESPSPPKPTVFISGVIAR	DDQEWESPSPPKPT[79.9663]VFISGVIAR	K	G	43	65	23	3	14T(79.9663)	sp|P51397|DAP1_HUMAN	P51397	DAP1_HUMAN	DAP	Death-associated protein 1			1	2.3189e+06	MS/MS	STY:79.9663@DDQEWES(0.0325)PS(0.0549)PPKPT(0.4563)VFIS(0.4563)GVIAR;
DDQEWESPSPPK	DDQEWESPS[79.9663]PPK	K	P	43	54	12	2	9S(79.9663)	sp|P51397|DAP1_HUMAN	P51397	DAP1_HUMAN	DAP	Death-associated protein 1			2	6.7433504E7	MS/MS	STY:79.9663@DDQEWES(0.0870)PS(0.9130)PPK;
DDQEWESPSPPK	DDQEWES[79.9663]PSPPK	K	P	43	54	12	2	7S(79.9663)	sp|P51397|DAP1_HUMAN	P51397	DAP1_HUMAN	DAP	Death-associated protein 1			3	6.7685584E7	MS/MS	STY:79.9663@DDQEWES(0.5000)PS(0.5000)PPK;
DDRSDVESSSEEEDVTTCTK	DDRS[79.9663]DVESS[79.9663]S[79.9663]EEEDVTTC[57.0215]TK	K	S	289	308	20	3	10S(79.9663),18C(57.0215),4S(79.9663),9S(79.9663)	sp|Q8N5B7-2|CERS5_HUMAN	Q8N5B7-2	CERS5_HUMAN	CERS5	Isoform 2 of Ceramide synthase 5		sp|Q8N5B7|CERS5_HUMAN	1	0	MS/MS	STY:79.9663@DDRS(0.8938)DVES(0.1111)S(0.8910)S(0.8910)EEEDVT(0.0710)T(0.0710)CT(0.0710)K;
DDSDDDGGGWITPSNIK	DDSDDDGGGWIT[79.9663]PSNIK	K	Q	199	215	17	2	12T(79.9663)	sp|Q9ULX3|NOB1_HUMAN	Q9ULX3	NOB1_HUMAN	NOB1	RNA-binding protein NOB1			1	1.9643444E7	MS/MS	STY:79.9663@DDS(0.0262)DDDGGGWIT(0.4869)PS(0.4869)NIK;
DDSFDSLDSFGSR	DDSFDSLDS[79.9663]FGSR	R	S	199	211	13	2	9S(79.9663)	sp|Q9UPQ0-10|LIMC1_HUMAN	Q9UPQ0-10	LIMC1_HUMAN	LIMCH1	Isoform 10 of LIM and calponin homology domains-containing protein 1		sp|Q9UPQ0-2|LIMC1_HUMAN, sp|Q9UPQ0-3|LIMC1_HUMAN, sp|Q9UPQ0-4|LIMC1_HUMAN, sp|Q9UPQ0-5|LIMC1_HUMAN, sp|Q9UPQ0-6|LIMC1_HUMAN, sp|Q9UPQ0-7|LIMC1_HUMAN, sp|Q9UPQ0-8|LIMC1_HUMAN, sp|Q9UPQ0-9|LIMC1_HUMAN, sp|Q9UPQ0|LIMC1_HUMAN	1	1.096324E7	MS/MS	STY:79.9663@DDS(0.0134)FDS(0.0134)LDS(0.4866)FGS(0.4866)R;
DDSFDSLDSFGSR	DDSFDS[79.9663]LDSFGSR	R	S	199	211	13	2	6S(79.9663)	sp|Q9UPQ0-10|LIMC1_HUMAN	Q9UPQ0-10	LIMC1_HUMAN	LIMCH1	Isoform 10 of LIM and calponin homology domains-containing protein 1		sp|Q9UPQ0-2|LIMC1_HUMAN, sp|Q9UPQ0-3|LIMC1_HUMAN, sp|Q9UPQ0-4|LIMC1_HUMAN, sp|Q9UPQ0-5|LIMC1_HUMAN, sp|Q9UPQ0-6|LIMC1_HUMAN, sp|Q9UPQ0-7|LIMC1_HUMAN, sp|Q9UPQ0-8|LIMC1_HUMAN, sp|Q9UPQ0-9|LIMC1_HUMAN, sp|Q9UPQ0|LIMC1_HUMAN	1	0	MS/MS	STY:79.9663@DDS(0.0185)FDS(0.9135)LDS(0.0202)FGS(0.0478)R;
DDSHSAEDSEDEK	DDSHSAEDS[79.9663]EDEK	K	E	71	83	13	2,3	9S(79.9663)	sp|Q9H1E3|NUCKS_HUMAN	Q9H1E3	NUCKS_HUMAN	NUCKS1	Nuclear ubiquitous casein and cyclin-dependent kinase substrate 1		sp|Q9H1E3-2|NUCKS_HUMAN	8	8.4623142E8	MS/MS	STY:79.9663@DDS(0.0275)HS(0.0275)AEDS(0.9450)EDEK;
DDSHSAEDSEDEKEDHK	DDSHSAEDS[79.9663]EDEKEDHK	K	N	71	87	17	3	9S(79.9663)	sp|Q9H1E3|NUCKS_HUMAN	Q9H1E3	NUCKS_HUMAN	NUCKS1	Nuclear ubiquitous casein and cyclin-dependent kinase substrate 1		sp|Q9H1E3-2|NUCKS_HUMAN	1	4823252	MS/MS	STY:79.9663@DDS(0.1893)HS(0.1893)AEDS(0.6214)EDEKEDHK;
DDSHSAEDSEDEK	DDSHS[79.9663]AEDSEDEK	K	E	71	83	13	2	5S(79.9663)	sp|Q9H1E3|NUCKS_HUMAN	Q9H1E3	NUCKS_HUMAN	NUCKS1	Nuclear ubiquitous casein and cyclin-dependent kinase substrate 1		sp|Q9H1E3-2|NUCKS_HUMAN	2	0	MS/MS	STY:79.9663@DDS(0.0318)HS(0.9386)AEDS(0.0296)EDEK;
DDSHSAEDSEDEK	DDSHS[79.9663]AEDS[79.9663]EDEK	K	E	71	83	13	2,3	5S(79.9663),9S(79.9663)	sp|Q9H1E3|NUCKS_HUMAN	Q9H1E3	NUCKS_HUMAN	NUCKS1	Nuclear ubiquitous casein and cyclin-dependent kinase substrate 1		sp|Q9H1E3-2|NUCKS_HUMAN	7	2.27680742E9	MS/MS	STY:79.9663@DDS(0.1081)HS(0.9459)AEDS(0.9459)EDEK;
DDSNEEENKDSLVDDEEEK	DDSNEEENKDS[79.9663]LVDDEEEK	K	E	249	267	19	2	11S(79.9663)	sp|Q9H1E5|TMX4_HUMAN	Q9H1E5	TMX4_HUMAN	TMX4	Thioredoxin-related transmembrane protein 4			2	2.0907604E7	MS/MS	STY:79.9663@DDS(0.0626)NEEENKDS(0.9374)LVDDEEEK;
DDSQSLADDSGKEEEDAECIDDDEEDEEDEEEDSEK	DDSQSLADDS[79.9663]GKEEEDAEC[57.0215]IDDDEEDEEDEEEDS[79.9663]EK	K	T	1706	1741	36	3	10S(79.9663),19C(57.0215),34S(79.9663)	sp|Q8NFD5-1|ARI1B_HUMAN	Q8NFD5-1	ARI1B_HUMAN	ARID1B	Isoform 1 of AT-rich interactive domain-containing protein 1B		sp|Q8NFD5-2|ARI1B_HUMAN, sp|Q8NFD5-3|ARI1B_HUMAN, sp|Q8NFD5|ARI1B_HUMAN	1	0	MS/MS	STY:79.9663@DDS(0.4709)QS(0.4709)LADDS(0.5309)GKEEEDAECIDDDEEDEEDEEEDS(0.5273)EK;
DDSTHESLSQESESEEDGIHVDSQK	DDSTHESLSQES[79.9663]ESEEDGIHVDSQK	K	A	108	132	25	3	12S(79.9663)	sp|Q9H6T3-2|RPAP3_HUMAN	Q9H6T3-2	RPAP3_HUMAN	RPAP3	Isoform 2 of RNA polymerase II-associated protein 3		sp|Q9H6T3|RPAP3_HUMAN	2	3.8178488E7	MS/MS	STY:79.9663@DDS(0.0155)T(0.0155)HES(0.0106)LS(0.0106)QES(0.9248)ES(0.0132)EEDGIHVDS(0.0096)QK;
DDSTHESLSQESESEEDGIHVDSQK	DDSTHESLSQES[79.9663]ES[79.9663]EEDGIHVDSQK	K	A	108	132	25	3	12S(79.9663),14S(79.9663)	sp|Q9H6T3-2|RPAP3_HUMAN	Q9H6T3-2	RPAP3_HUMAN	RPAP3	Isoform 2 of RNA polymerase II-associated protein 3		sp|Q9H6T3|RPAP3_HUMAN	5	3.56877664E8	MS/MS	STY:79.9663@DDS(0.0224)T(0.0224)HES(0.0254)LS(0.0254)QES(0.9379)ES(0.9380)EEDGIHVDS(0.0286)QK;
DDSTHESLSQESESEEDGIHVDSQK	DDSTHESLS[79.9663]QESESEEDGIHVDS[79.9663]QK	K	A	108	132	25	3	23S(79.9663),9S(79.9663)	sp|Q9H6T3-2|RPAP3_HUMAN	Q9H6T3-2	RPAP3_HUMAN	RPAP3	Isoform 2 of RNA polymerase II-associated protein 3		sp|Q9H6T3|RPAP3_HUMAN	1	0	MS/MS	STY:79.9663@DDS(0.0331)T(0.0484)HES(0.0484)LS(0.5910)QES(0.5910)ES(0.0575)EEDGIHVDS(0.6306)QK;
DDSTHESLSQESESEEDGIHVDSQK	DDSTHESLS[79.9663]QESES[79.9663]EEDGIHVDSQK	K	A	108	132	25	3	14S(79.9663),9S(79.9663)	sp|Q9H6T3-2|RPAP3_HUMAN	Q9H6T3-2	RPAP3_HUMAN	RPAP3	Isoform 2 of RNA polymerase II-associated protein 3		sp|Q9H6T3|RPAP3_HUMAN	1	3.56877664E8	MS/MS	STY:79.9663@DDS(0.0393)T(0.0393)HES(0.0396)LS(0.5643)QES(0.5643)ES(0.7151)EEDGIHVDS(0.0381)QK;
DDSTHESLSQESESEEDGIHVDSQK	DDSTHESLS[79.9663]QES[79.9663]ESEEDGIHVDSQK	K	A	108	132	25	3	12S(79.9663),9S(79.9663)	sp|Q9H6T3-2|RPAP3_HUMAN	Q9H6T3-2	RPAP3_HUMAN	RPAP3	Isoform 2 of RNA polymerase II-associated protein 3		sp|Q9H6T3|RPAP3_HUMAN	2	0	MS/MS	STY:79.9663@DDS(0.1641)T(0.1641)HES(0.0580)LS(0.7593)QES(0.7554)ES(0.0193)EEDGIHVDS(0.0797)QK;
DDSTHESLSQESESEEDGIHVDSQK	DDSTHESLS[79.9663]QES[79.9663]ES[79.9663]EEDGIHVDSQK	K	A	108	132	25	3	12S(79.9663),14S(79.9663),9S(79.9663)	sp|Q9H6T3-2|RPAP3_HUMAN	Q9H6T3-2	RPAP3_HUMAN	RPAP3	Isoform 2 of RNA polymerase II-associated protein 3		sp|Q9H6T3|RPAP3_HUMAN	3	3.48350528E8	MS/MS	STY:79.9663@DDS(0.0432)T(0.0432)HES(0.0432)LS(0.9451)QES(0.9434)ES(0.9408)EEDGIHVDS(0.0410)QK;
DDSTHESLSQESESEEDGIHVDSQK	DDSTHES[79.9663]LSQES[79.9663]ESEEDGIHVDSQK	K	A	108	132	25	3	12S(79.9663),7S(79.9663)	sp|Q9H6T3-2|RPAP3_HUMAN	Q9H6T3-2	RPAP3_HUMAN	RPAP3	Isoform 2 of RNA polymerase II-associated protein 3		sp|Q9H6T3|RPAP3_HUMAN	1	3.37525792E8	MS/MS	STY:79.9663@DDS(0.0170)T(0.0170)HES(0.5539)LS(0.5539)QES(0.7030)ES(0.0319)EEDGIHVDS(0.1233)QK;
DDSTHESLSQESESEEDGIHVDSQK	DDST[79.9663]HESLSQES[79.9663]ES[79.9663]EEDGIHVDSQK	K	A	108	132	25	3	12S(79.9663),14S(79.9663),4T(79.9663)	sp|Q9H6T3-2|RPAP3_HUMAN	Q9H6T3-2	RPAP3_HUMAN	RPAP3	Isoform 2 of RNA polymerase II-associated protein 3		sp|Q9H6T3|RPAP3_HUMAN	1	3.44723424E8	MS/MS	STY:79.9663@DDS(0.0582)T(0.8564)HES(0.0446)LS(0.0410)QES(0.8573)ES(0.8574)EEDGIHVDS(0.2851)QK;
DDSTHESLSQESESEEDGIHVDSQK	DDST[79.9663]HES[79.9663]LSQES[79.9663]ESEEDGIHVDSQK	K	A	108	132	25	3	12S(79.9663),4T(79.9663),7S(79.9663)	sp|Q9H6T3-2|RPAP3_HUMAN	Q9H6T3-2	RPAP3_HUMAN	RPAP3	Isoform 2 of RNA polymerase II-associated protein 3		sp|Q9H6T3|RPAP3_HUMAN	1	3.44723424E8	MS/MS	STY:79.9663@DDS(0.1833)T(0.6125)HES(0.6242)LS(0.4618)QES(0.6463)ES(0.3636)EEDGIHVDS(0.1084)QK;
DDSFDSLDSFGSR	DDS[79.9663]FDSLDSFGS[79.9663]R	R	S	199	211	13	2	12S(79.9663),3S(79.9663)	sp|Q9UPQ0-10|LIMC1_HUMAN	Q9UPQ0-10	LIMC1_HUMAN	LIMCH1	Isoform 10 of LIM and calponin homology domains-containing protein 1		sp|Q9UPQ0-2|LIMC1_HUMAN, sp|Q9UPQ0-3|LIMC1_HUMAN, sp|Q9UPQ0-4|LIMC1_HUMAN, sp|Q9UPQ0-5|LIMC1_HUMAN, sp|Q9UPQ0-6|LIMC1_HUMAN, sp|Q9UPQ0-7|LIMC1_HUMAN, sp|Q9UPQ0-8|LIMC1_HUMAN, sp|Q9UPQ0-9|LIMC1_HUMAN, sp|Q9UPQ0|LIMC1_HUMAN	1	0	MS/MS	STY:79.9663@DDS(0.5436)FDS(0.5436)LDS(0.3296)FGS(0.5833)R;
DDSFDSLDSFGSR	DDS[79.9663]FDSLDS[79.9663]FGSR	R	S	199	211	13	2	3S(79.9663),9S(79.9663)	sp|Q9UPQ0-10|LIMC1_HUMAN	Q9UPQ0-10	LIMC1_HUMAN	LIMCH1	Isoform 10 of LIM and calponin homology domains-containing protein 1		sp|Q9UPQ0-2|LIMC1_HUMAN, sp|Q9UPQ0-3|LIMC1_HUMAN, sp|Q9UPQ0-4|LIMC1_HUMAN, sp|Q9UPQ0-5|LIMC1_HUMAN, sp|Q9UPQ0-6|LIMC1_HUMAN, sp|Q9UPQ0-7|LIMC1_HUMAN, sp|Q9UPQ0-8|LIMC1_HUMAN, sp|Q9UPQ0-9|LIMC1_HUMAN, sp|Q9UPQ0|LIMC1_HUMAN	1	1.5261582E7	MS/MS	STY:79.9663@DDS(0.9249)FDS(0.0710)LDS(0.9266)FGS(0.0775)R;
DDSHSAEDSEDEK	DDS[79.9663]HSAEDS[79.9663]EDEK	K	E	71	83	13	2	3S(79.9663),9S(79.9663)	sp|Q9H1E3|NUCKS_HUMAN	Q9H1E3	NUCKS_HUMAN	NUCKS1	Nuclear ubiquitous casein and cyclin-dependent kinase substrate 1		sp|Q9H1E3-2|NUCKS_HUMAN	8	2.18553933E9	MS/MS	STY:79.9663@DDS(0.9387)HS(0.1258)AEDS(0.9355)EDEK;
DDSHSAEDSEDEKEDHK	DDS[79.9663]HSAEDS[79.9663]EDEKEDHK	K	N	71	87	17	3	3S(79.9663),9S(79.9663)	sp|Q9H1E3|NUCKS_HUMAN	Q9H1E3	NUCKS_HUMAN	NUCKS1	Nuclear ubiquitous casein and cyclin-dependent kinase substrate 1		sp|Q9H1E3-2|NUCKS_HUMAN	2	4.1144424E7	MS/MS	STY:79.9663@DDS(0.6551)HS(0.6551)AEDS(0.6898)EDEKEDHK;
DDSHSAEDSEDEK	DDS[79.9663]HS[79.9663]AEDSEDEK	K	E	71	83	13	2	3S(79.9663),5S(79.9663)	sp|Q9H1E3|NUCKS_HUMAN	Q9H1E3	NUCKS_HUMAN	NUCKS1	Nuclear ubiquitous casein and cyclin-dependent kinase substrate 1		sp|Q9H1E3-2|NUCKS_HUMAN	1	5.398162E7	MS/MS	STY:79.9663@DDS(0.9376)HS(0.9376)AEDS(0.1249)EDEK;
DDSHSAEDSEDEK	DDS[79.9663]HS[79.9663]AEDS[79.9663]EDEK	K	E	71	83	13	2	3S(79.9663),5S(79.9663),9S(79.9663)	sp|Q9H1E3|NUCKS_HUMAN	Q9H1E3	NUCKS_HUMAN	NUCKS1	Nuclear ubiquitous casein and cyclin-dependent kinase substrate 1		sp|Q9H1E3-2|NUCKS_HUMAN	9	4.69224768E8	MS/MS	STY:79.9663@DDS(1.0000)HS(1.0000)AEDS(1.0000)EDEK;
DDSNEEENKDSLVDDEEEK	DDS[79.9663]NEEENKDSLVDDEEEK	K	E	249	267	19	3	3S(79.9663)	sp|Q9H1E5|TMX4_HUMAN	Q9H1E5	TMX4_HUMAN	TMX4	Thioredoxin-related transmembrane protein 4			2	5.35027E7	MS/MS	STY:79.9663@DDS(0.8881)NEEENKDS(0.1119)LVDDEEEK;
DDSNEEENKDSLVDDEEEK	DDS[79.9663]NEEENKDS[79.9663]LVDDEEEK	K	E	249	267	19	2,3	11S(79.9663),3S(79.9663)	sp|Q9H1E5|TMX4_HUMAN	Q9H1E5	TMX4_HUMAN	TMX4	Thioredoxin-related transmembrane protein 4			15	4.62317376E8	MS/MS	STY:79.9663@DDS(1.0000)NEEENKDS(1.0000)LVDDEEEK;
DDSPVSHR	DDS[79.9663]PVSHR	R	A	323	330	8	2	3S(79.9663)	sp|Q14004-2|CDK13_HUMAN	Q14004-2	CDK13_HUMAN	CDK13	Isoform 2 of Cyclin-dependent kinase 13		sp|Q14004|CDK13_HUMAN	1	0	MS/MS	STY:79.9663@DDS(0.5000)PVS(0.5000)HR;
DDSTHESLSQESESEEDGIHVDSQK	DDS[79.9663]THESLSQESESEEDGIHVDSQK	K	A	108	132	25	3	3S(79.9663)	sp|Q9H6T3-2|RPAP3_HUMAN	Q9H6T3-2	RPAP3_HUMAN	RPAP3	Isoform 2 of RNA polymerase II-associated protein 3		sp|Q9H6T3|RPAP3_HUMAN	1	3.8178488E7	MS/MS	STY:79.9663@DDS(0.4122)T(0.4122)HES(0.0354)LS(0.0354)QES(0.0176)ES(0.0116)EEDGIHVDS(0.0757)QK;
DDSTHESLSQESESEEDGIHVDSQK	DDS[79.9663]THESLSQESESEEDGIHVDS[79.9663]QK	K	A	108	132	25	3,4	23S(79.9663),3S(79.9663)	sp|Q9H6T3-2|RPAP3_HUMAN	Q9H6T3-2	RPAP3_HUMAN	RPAP3	Isoform 2 of RNA polymerase II-associated protein 3		sp|Q9H6T3|RPAP3_HUMAN	2	7136815	MS/MS	STY:79.9663@DDS(0.3310)T(0.3310)HES(0.3310)LS(0.3310)QES(0.0187)ES(0.3052)EEDGIHVDS(0.3519)QK;
DDSTHESLSQESESEEDGIHVDSQK	DDS[79.9663]THESLSQES[79.9663]ES[79.9663]EEDGIHVDSQK	K	A	108	132	25	3	12S(79.9663),14S(79.9663),3S(79.9663)	sp|Q9H6T3-2|RPAP3_HUMAN	Q9H6T3-2	RPAP3_HUMAN	RPAP3	Isoform 2 of RNA polymerase II-associated protein 3		sp|Q9H6T3|RPAP3_HUMAN	1	0	MS/MS	STY:79.9663@DDS(0.6366)T(0.6366)HES(0.1185)LS(0.0435)QES(0.7241)ES(0.7241)EEDGIHVDS(0.1166)QK;
DDSTHESLSQESESEEDGIHVDSQK	DDS[79.9663]THESLS[79.9663]QES[79.9663]ESEEDGIHVDSQK	K	A	108	132	25	3	12S(79.9663),3S(79.9663),9S(79.9663)	sp|Q9H6T3-2|RPAP3_HUMAN	Q9H6T3-2	RPAP3_HUMAN	RPAP3	Isoform 2 of RNA polymerase II-associated protein 3		sp|Q9H6T3|RPAP3_HUMAN	1	0	MS/MS	STY:79.9663@DDS(0.6259)T(0.6259)HES(0.0789)LS(0.7136)QES(0.7110)ES(0.0725)EEDGIHVDS(0.1721)QK;
DDSTHESLSQESESEEDGIHVDSQK	DDS[79.9663]THES[79.9663]LSQESESEEDGIHVDSQK	K	A	108	132	25	3	3S(79.9663),7S(79.9663)	sp|Q9H6T3-2|RPAP3_HUMAN	Q9H6T3-2	RPAP3_HUMAN	RPAP3	Isoform 2 of RNA polymerase II-associated protein 3		sp|Q9H6T3|RPAP3_HUMAN	1	3.37525792E8	MS/MS	STY:79.9663@DDS(0.6828)T(0.1063)HES(0.6950)LS(0.0231)QES(0.0231)ES(0.0231)EEDGIHVDS(0.4467)QK;
DDSTHESLSQESESEEDGIHVDSQK	DDS[79.9663]T[79.9663]HESLSQESESEEDGIHVDS[79.9663]QK	K	A	108	132	25	3	23S(79.9663),3S(79.9663),4T(79.9663)	sp|Q9H6T3-2|RPAP3_HUMAN	Q9H6T3-2	RPAP3_HUMAN	RPAP3	Isoform 2 of RNA polymerase II-associated protein 3		sp|Q9H6T3|RPAP3_HUMAN	1	3.44723424E8	MS/MS	STY:79.9663@DDS(0.5609)T(0.5609)HES(0.4290)LS(0.3680)QES(0.4290)ES(0.0606)EEDGIHVDS(0.5916)QK;
[truncated: 12,046 more rows]

## Sheet: 100000cells_2_MSFragger
Peptide Sequence	Modified Sequence	Prev AA	Next AA	Start	End	Peptide Length	Charges	Assigned Modifications	Protein	Protein ID	Entry Name	Gene	Protein Description	Mapped Genes	Mapped Proteins	cell5_4 Spectral Count	cell5_4 Intensity	cell5_4 Match Type	cell5_4 Localization
[truncated: 14,597 more rows]

## Sheet: 100000cells_3_MSFragger
Peptide Sequence	Modified Sequence	Prev AA	Next AA	Start	End	Peptide Length	Charges	Assigned Modifications	Protein	Protein ID	Entry Name	Gene	Protein Description	Mapped Genes	Mapped Proteins	cell5_5 Spectral Count	cell5_5 Intensity	cell5_5 Match Type	cell5_5 Localization
[truncated: 12,937 more rows]

[truncated: 5 more sheets: 100000cells_1_PD, 100000cells_2_PD, 100000cells_3_PD, phosphoprotein, phosphosite]
