# Supplementary material for: Unlocking Ultrasensitive Phosphoproteomics of Nanoscale Samples: A Rapid IMAC Enrichment Platform Using Ti-PAN Tip
Source: Research Square preprint supplement (doi:10.21203/rs.3.rs-8623740/v1), 2026-01-28
Supplement: Supplementary file 5 [file 39f427d5d8d6a73307e22945.xlsx]

## Sheet: 100cells
Protein.Group	Protein.Ids	Protein.Names	Genes	First.Protein.Description	Proteotypic	Stripped.Sequence	Modified.Sequence	Precursor.Charge	Precursor.Id	G:\WUCI\1E2_1_DIA.raw	G:\WUCI\1E2_2_DIA.raw	G:\WUCI\1E2_3_DIA.raw
Q1KMD3	Q1KMD3;H3BQZ7	HNRL2_HUMAN	HNRNPUL2	Heterogeneous nuclear ribonucleoprotein U-like protein 2	0	AAEEQGDDQDSEK	AAEEQGDDQDS(UniMod:21)EK	2	AAEEQGDDQDS(UniMod:21)EK2	201056		271058
O76021	O76021;J3QSV6	RL1D1_HUMAN	RSL1D1	Ribosomal L1 domain-containing protein 1	1	AAESETPGKSPEK	AAESETPGKS(UniMod:21)PEK	2	AAESETPGKS(UniMod:21)PEK2	1.08983e+06	826033	863827
Q9H0S4	Q9H0S4;F5H1N9	DDX47_HUMAN	DDX47	Probable ATP-dependent RNA helicase DDX47	1	AAPEEHDSPTEASQPIVEEEETK	AAPEEHDS(UniMod:21)PT(UniMod:21)EASQPIVEEEETK	3	AAPEEHDS(UniMod:21)PT(UniMod:21)EASQPIVEEEETK3	138219
O75694	O75694;E9PF10	NU155_HUMAN	NUP155	Nuclear pore complex protein Nup155	1	AAPQSPSVPK	AAPQS(UniMod:21)PSVPK	2	AAPQS(UniMod:21)PSVPK2	721102	737966
Q04637	Q04637;E7EX73;E9PGM1;E7EUU4;A0A7I2Y1C3	IF4G1_HUMAN	EIF4G1	Eukaryotic translation initiation factor 4 gamma 1	1	AASLTEDRDR	AAS(UniMod:21)LTEDRDR	2	AAS(UniMod:21)LTEDRDR2	2.65753e+06	2.63238e+06	2.86566e+06
Q8IYB3	Q8IYB3;A9Z1X7	SRRM1_HUMAN	SRRM1	Serine/arginine repetitive matrix protein 1	1	AASPSPQSVR	AAS(UniMod:21)PSPQSVR	2	AAS(UniMod:21)PSPQSVR2		325404
Q96ST2	Q96ST2	IWS1_HUMAN	IWS1	Protein IWS1 homolog	1	AAVLSDSEDEEK	AAVLS(UniMod:21)DS(UniMod:21)EDEEK	2	AAVLS(UniMod:21)DS(UniMod:21)EDEEK2	1.16628e+06	955113	1.13422e+06
Q96ST2	Q96ST2	IWS1_HUMAN	IWS1	Protein IWS1 homolog	1	AAVLSDSEDEEK	AAVLSDS(UniMod:21)EDEEK	2	AAVLSDS(UniMod:21)EDEEK2	213276	181935	225513
O15541	O15541	R113A_HUMAN	RNF113A	E3 ubiquitin-protein ligase RNF113A	1	AAYGDLSSEEEEENEPESLGVVYK	AAYGDLS(UniMod:21)S(UniMod:21)EEEEENEPESLGVVYK	3	AAYGDLS(UniMod:21)S(UniMod:21)EEEEENEPESLGVVYK3	483188	439339
Q92538	Q92538;A0A669KBG8;A0A7I2V3Y5;A0A7I2V4K2;A0A669KB10;A0A7I2V452;A0A7I2V2L4;A0A7I2V2L5;A0A7I2V529;A0A7I2YQ65;A0A7I2V514;A0A7I2YQM2;A0A7P0RGV0	GBF1_HUMAN	GBF1	Golgi-specific brefeldin A-resistance guanine nucleotide exchange factor 1	1	ADAPDAGAQSDSELPSYHQNDVSLDR	ADAPDAGAQS(UniMod:21)DSELPSYHQNDVSLDR	3	ADAPDAGAQS(UniMod:21)DSELPSYHQNDVSLDR3	1.48731e+06	933156	1.37592e+06
P50502;Q8IZP2	P50502;Q8IZP2;F6VDH7	F10A1_HUMAN;ST134_HUMAN	ST13;ST13P4	Hsc70-interacting protein	0	ADEPSSEESDLEIDK	ADEPS(UniMod:21)S(UniMod:21)EES(UniMod:21)DLEIDK	2	ADEPS(UniMod:21)S(UniMod:21)EES(UniMod:21)DLEIDK2	8.42873e+06	5.70139e+06	7.08938e+06
P50502;Q8IZP2	P50502;Q8IZP2;F6VDH7	F10A1_HUMAN;ST134_HUMAN	ST13;ST13P4	Hsc70-interacting protein	0	ADEPSSEESDLEIDK	ADEPSS(UniMod:21)EES(UniMod:21)DLEIDK	2	ADEPSS(UniMod:21)EES(UniMod:21)DLEIDK2	5.26815e+06	4.7285e+06	7.86275e+06
Q09666	Q09666	AHNK_HUMAN	AHNAK	Neuroblast differentiation-associated protein AHNAK	1	AEAPLPSPK	AEAPLPS(UniMod:21)PK	2	AEAPLPS(UniMod:21)PK2	624392	611137	620846
Q9P1Y6	Q9P1Y6;B7ZM65;A0A0J9YYB5;E9PJ24;F8WEF5;A0A0J9YWD5;A0A0J9YX88	PHRF1_HUMAN	PHRF1	PHD and RING finger domain-containing protein 1	1	AEAPSSPDVAPAGK	AEAPS(UniMod:21)SPDVAPAGK	2	AEAPS(UniMod:21)SPDVAPAGK2			147497
P29966	P29966	MARCS_HUMAN	MARCKS	Myristoylated alanine-rich C-kinase substrate	1	AEDGATPSPSNETPK	AEDGATPSPSNET(UniMod:21)PK	2	AEDGATPSPSNET(UniMod:21)PK2	5.95005e+06	6.31571e+06	5.27411e+06
P29966	P29966	MARCS_HUMAN	MARCKS	Myristoylated alanine-rich C-kinase substrate	1	AEDGATPSPSNETPKK	AEDGATPSPSNET(UniMod:21)PKK	2	AEDGATPSPSNET(UniMod:21)PKK2	2.21336e+06	1.10397e+06	2.09456e+06
P27824	P27824;A0A7P0TAE9;A0A7P0TB65;D6RGY2;A0A7P0T937;A0A7P0Z484	CALX_HUMAN	CANX	Calnexin	1	AEEDEILNRSPR	AEEDEILNRS(UniMod:21)PR	2	AEEDEILNRS(UniMod:21)PR2	3.33018e+07	2.63238e+07	2.969e+07
Q15459	Q15459;H7C1L2	SF3A1_HUMAN	SF3A1	Splicing factor 3A subunit 1	1	AEEPPSQLDQDTQVQDMDEGSDDEEEGQK	AEEPPSQLDQDTQVQDMDEGS(UniMod:21)DDEEEGQK	3	AEEPPSQLDQDTQVQDMDEGS(UniMod:21)DDEEEGQK3	3.02476e+06	3.07134e+06	3.07468e+06
P80723	P80723;U3KQP0	BASP1_HUMAN	BASP1	Brain acid soluble protein 1	1	AEGAATEEEGTPK	AEGAATEEEGT(UniMod:21)PK	2	AEGAATEEEGT(UniMod:21)PK2	416979	499428	604887
P21333	P21333;Q60FE5	FLNA_HUMAN	FLNA	Filamin-A	1	AFGPGLQGGSAGSPAR	AFGPGLQGGSAGS(UniMod:21)PAR	2	AFGPGLQGGSAGS(UniMod:21)PAR2	1.67199e+06	1.31691e+06	1.16107e+06
P51858	P51858	HDGF_HUMAN	HDGF	Hepatoma-derived growth factor	1	AGDLLEDSPK	AGDLLEDS(UniMod:21)PK	2	AGDLLEDS(UniMod:21)PK2	9.70794e+06	1.04666e+07	1.19997e+07
Q92522	Q92522	H1X_HUMAN	H1-10	Histone H1.10	1	AGGSAALSPSK	AGGSAALS(UniMod:21)PSK	2	AGGSAALS(UniMod:21)PSK2	2.08098e+06	2.47107e+06	2.37489e+06
O60832	O60832	DKC1_HUMAN	DKC1	H/ACA ribonucleoprotein complex subunit DKC1	1	AGLESGAEPGDGDSDTTK	AGLESGAEPGDGDS(UniMod:21)DTTK	2	AGLESGAEPGDGDS(UniMod:21)DTTK2	2.64663e+06	2.81423e+06	2.87772e+06
Q96MU7	Q96MU7;J3QR07	YTDC1_HUMAN	YTHDC1	YTH domain-containing protein 1	1	AKSPTPDGSER	AKS(UniMod:21)PT(UniMod:21)PDGSER	2	AKS(UniMod:21)PT(UniMod:21)PDGSER2	394416	305634	369895
Q8IY81	Q8IY81	SPB1_HUMAN	FTSJ3	pre-rRNA 2'-O-ribose RNA methyltransferase FTSJ3	1	ALDISLSSGEEDEGDEEDSTAGTTK	ALDIS(UniMod:21)LSS(UniMod:21)GEEDEGDEEDSTAGTTK	3	ALDIS(UniMod:21)LSS(UniMod:21)GEEDEGDEEDSTAGTTK3	860269	553536
Q13769	Q13769;H7C072	THOC5_HUMAN	THOC5	THO complex subunit 5 homolog	1	ALFKPPEDSQDDESDSDAEEEQTTK	ALFKPPEDS(UniMod:21)QDDESDS(UniMod:21)DAEEEQTTK	3	ALFKPPEDS(UniMod:21)QDDESDS(UniMod:21)DAEEEQTTK3	1.19699e+06
Q06265	Q06265;D6RIY6	EXOS9_HUMAN	EXOSC9	Exosome complex component RRP45	1	APIDTSDVEEK	APIDTS(UniMod:21)DVEEK	2	APIDTS(UniMod:21)DVEEK2	1.04568e+06	1.00528e+06	1.21263e+06
A0A1B0GW05	A0A1B0GW05	A0A1B0GW05_HUMAN	DPY19L1	Probable C-mannosyltransferase DPY19L1	1	APLSPGRK	APLS(UniMod:21)PGRK	2	APLS(UniMod:21)PGRK2	158993
Q8IYB3	Q8IYB3;M0R088;A9Z1X7	SRRM1_HUMAN	SRRM1	Serine/arginine repetitive matrix protein 1	1	APQTSSSPPPVR	APQTSSS(UniMod:21)PPPVR	2	APQTSSS(UniMod:21)PPPVR2	3.41598e+06	3.58642e+06	3.24353e+06
Q13200	Q13200;F8WBS8;C9JPC0	PSMD2_HUMAN	PSMD2	26S proteasome non-ATPase regulatory subunit 2	1	APVQPQQSPAAAPGGTDEKPSGK	APVQPQQS(UniMod:21)PAAAPGGTDEKPSGK	3	APVQPQQS(UniMod:21)PAAAPGGTDEKPSGK3	645299	169795
Q9GZR7	Q9GZR7;G3V529	DDX24_HUMAN	DDX24	ATP-dependent RNA helicase DDX24	1	AQAVSEEEEEEEGK	AQAVS(UniMod:21)EEEEEEEGK	2	AQAVS(UniMod:21)EEEEEEEGK2	467439	378224	407468
O94979	O94979;H0YAB3;D6RHZ5;D6REX3;H7BXG7	SC31A_HUMAN	SEC31A	Protein transport protein Sec31A	1	AQGEPVAGHESPK	AQGEPVAGHES(UniMod:21)PK	2	AQGEPVAGHES(UniMod:21)PK2	396433	424429	801538
Q15149	Q15149;A0A8I5KYZ1;A0A8I5KSD5;E9PMV1;A0A8I5KUE3;H0YDN1	PLEC_HUMAN	PLEC	Plectin	1	AQLEPVASPAK	AQLEPVAS(UniMod:21)PAK	2	AQLEPVAS(UniMod:21)PAK2	922807	811781	693252
O00231	O00231;J3QRY4	PSD11_HUMAN	PSMD11	26S proteasome non-ATPase regulatory subunit 11	1	AQSLLSTDR	AQS(UniMod:21)LLSTDR	2	AQS(UniMod:21)LLSTDR2	228197	153408	130716
Q9UQ35	Q9UQ35;I3L4D8	SRRM2_HUMAN	SRRM2	Serine/arginine repetitive matrix protein 2	1	AQTPPGPSLSGSK	AQT(UniMod:21)PPGPSLSGSK	2	AQT(UniMod:21)PPGPSLSGSK2	1.76524e+06	2.23388e+06	2.60344e+06
Q13247	Q13247	SRSF6_HUMAN	SRSF6	Serine/arginine-rich splicing factor 6	1	ARSVSPPPK	ARS(UniMod:21)VS(UniMod:21)PPPK	2	ARS(UniMod:21)VS(UniMod:21)PPPK2	1.23603e+07	9.53845e+06	1.24122e+07
Q9H1B7	Q9H1B7	I2BPL_HUMAN	IRF2BPL	Probable E3 ubiquitin-protein ligase IRF2BPL	1	ASPEPPDSAEGALK	AS(UniMod:21)PEPPDSAEGALK	2	AS(UniMod:21)PEPPDSAEGALK2			194695
O00273	O00273	DFFA_HUMAN	DFFA	DNA fragmentation factor subunit alpha	1	ASPPGDLQNPK	AS(UniMod:21)PPGDLQNPK	2	AS(UniMod:21)PPGDLQNPK2	1.00429e+06	938507	1.03204e+06
Q9Y2W1	Q9Y2W1;A0A3B3ITZ9	TR150_HUMAN	THRAP3	Thyroid hormone receptor-associated protein 3	1	ASAVSELSPR	ASAVSELS(UniMod:21)PR	2	ASAVSELS(UniMod:21)PR2	2.80038e+06	2.93195e+06	2.74191e+06
Q16513	Q16513	PKN2_HUMAN	PKN2	Serine/threonine-protein kinase N2	1	ASSLGEIDESSELR	ASS(UniMod:21)LGEIDESSELR	2	ASS(UniMod:21)LGEIDESSELR2	411936	225297	328379
Q14978	Q14978;A0A0A0MRM9	NOLC1_HUMAN	NOLC1	Nucleolar and coiled-body phosphoprotein 1	1	ASSPFRR	ASS(UniMod:21)PFRR	2	ASS(UniMod:21)PFRR2	1.07049e+06	888901
Q9NSU2	Q9NSU2;C9J052	TREX1_HUMAN	TREX1	Three-prime repair exonuclease 1	1	ASSPSEHGPR	ASS(UniMod:21)PSEHGPR	2	ASS(UniMod:21)PSEHGPR2	257388	207091	239954
P29692	P29692;E9PI39;E9PRY8;E9PPR1;E9PK01;E9PL12;E9PQZ1;A0A087X1X7;E9PK06;E9PQ49;E9PL71	EF1D_HUMAN	EEF1D	Elongation factor 1-delta	1	ATAPQTQHVSPMR	ATAPQTQHVS(UniMod:21)PMR	2	ATAPQTQHVS(UniMod:21)PMR2	4.90921e+06	8.43668e+06	4.31108e+06
P29692	P29692;E9PI39;E9PRY8;E9PPR1;E9PK01;E9PL12;E9PQZ1;A0A087X1X7;E9PK06;E9PQ49;E9PL71	EF1D_HUMAN	EEF1D	Elongation factor 1-delta	1	ATAPQTQHVSPMR	ATAPQTQHVS(UniMod:21)PMR	3	ATAPQTQHVS(UniMod:21)PMR3	2.60735e+06	3.70217e+06	1.46224e+06
Q9BXW9	Q9BXW9;A0A6Q8PFY3	FACD2_HUMAN	FANCD2	Fanconi anemia group D2 protein	1	ATEDGEEDEVSAGEK	ATEDGEEDEVS(UniMod:21)AGEK	2	ATEDGEEDEVS(UniMod:21)AGEK2		578988	435859
Q03252	Q03252	LMNB2_HUMAN	LMNB2	Lamin-B2	1	ATSSSSGSLSATGR	ATS(UniMod:21)SSSGSLSATGR	2	ATS(UniMod:21)SSSGSLSATGR2		212612	189352
Q9H1E3	Q9H1E3	NUCKS_HUMAN	NUCKS1	Nuclear ubiquitous casein and cyclin-dependent kinase substrate 1	1	ATVTPSPVK	ATVT(UniMod:21)PS(UniMod:21)PVK	2	ATVT(UniMod:21)PS(UniMod:21)PVK2	2.27693e+06	1.50916e+06	2.118e+06
Q9H1E3	Q9H1E3	NUCKS_HUMAN	NUCKS1	Nuclear ubiquitous casein and cyclin-dependent kinase substrate 1	1	ATVTPSPVK	ATVTPS(UniMod:21)PVK	2	ATVTPS(UniMod:21)PVK2	7.07319e+06	6.82824e+06	6.66039e+06
Q9P275	Q9P275	UBP36_HUMAN	USP36	Ubiquitin carboxyl-terminal hydrolase 36	1	AVSPAPQSSSR	AVS(UniMod:21)PAPQSSSR	2	AVS(UniMod:21)PAPQSSSR2	229914	182386	213047
Q8NEF9	Q8NEF9	SRFB1_HUMAN	SRFBP1	Serum response factor-binding protein 1	1	AVTIANSPSK	AVTIANSPS(UniMod:21)K	2	AVTIANSPS(UniMod:21)K2			204761
P24534	P24534;C9JZW3	EF1B_HUMAN	EEF1B2	Elongation factor 1-beta	1	DDDDIDLFGSDDEEESEEAK	DDDDIDLFGS(UniMod:21)DDEEESEEAK	3	DDDDIDLFGS(UniMod:21)DDEEESEEAK3	132954	235537	199712
O94874	O94874	UFL1_HUMAN	UFL1	E3 UFM1-protein ligase 1	1	DDDSDDESQSSHTGK	DDDS(UniMod:21)DDESQSSHTGK	2	DDDS(UniMod:21)DDESQSSHTGK2
Q9H1E3	Q9H1E3	NUCKS_HUMAN	NUCKS1	Nuclear ubiquitous casein and cyclin-dependent kinase substrate 1	1	DDSHSAEDSEDEK	DDSHS(UniMod:21)AEDS(UniMod:21)EDEK	2	DDSHS(UniMod:21)AEDS(UniMod:21)EDEK2			803772
Q9H1E3	Q9H1E3	NUCKS_HUMAN	NUCKS1	Nuclear ubiquitous casein and cyclin-dependent kinase substrate 1	1	DDSHSAEDSEDEK	DDSHSAEDS(UniMod:21)EDEK	2	DDSHSAEDS(UniMod:21)EDEK2			297991
P06748	P06748;A0A7I2V579;A0A7I2V433;A0A7I2V4G8;A0A7I2V2X9;A0A7I2YQC0;A0A7I2V3U2;A0A7I2V5S2;A0A7I2V3G5	NPM_HUMAN	NPM1	Nucleophosmin	1	DELHIVEAEAMNYEGSPIK	DELHIVEAEAMNYEGS(UniMod:21)PIK	3	DELHIVEAEAMNYEGS(UniMod:21)PIK3	495484	508808	329978
P25205	P25205;J3KQ69;Q7Z6P5;A0A499FHX9	MCM3_HUMAN	MCM3	DNA replication licensing factor MCM3	1	DGDSYDPYDFSDTEEEMPQVHTPK	DGDSYDPY(UniMod:21)DFS(UniMod:21)DTEEEMPQVHT(UniMod:21)PK	3	DGDSYDPY(UniMod:21)DFS(UniMod:21)DTEEEMPQVHT(UniMod:21)PK3	483569
P25205	P25205;J3KQ69;Q7Z6P5;A0A499FHX9	MCM3_HUMAN	MCM3	DNA replication licensing factor MCM3	1	DGDSYDPYDFSDTEEEMPQVHTPK	DGDSYDPY(UniMod:21)DFSDTEEEMPQVHT(UniMod:21)PK	3	DGDSYDPY(UniMod:21)DFSDTEEEMPQVHT(UniMod:21)PK3	616117	779317	549916
Q9NWH9	Q9NWH9;H0YL55;H7BXE3	SLTM_HUMAN	SLTM	SAFB-like transcription modulator	1	DGQDAIAQSPEK	DGQDAIAQS(UniMod:21)PEK	2	DGQDAIAQS(UniMod:21)PEK2	2.04132e+06	2.13793e+06	2.08166e+06
Q09666	Q09666	AHNK_HUMAN	AHNAK	Neuroblast differentiation-associated protein AHNAK	1	DIDISSPEFK	DIDISS(UniMod:21)PEFK	2	DIDISS(UniMod:21)PEFK2	1.40419e+06	1.26885e+06	1.29474e+06
Q96GX9	Q96GX9;S4R3D6	MTNB_HUMAN	APIP	Methylthioribulose-1-phosphate dehydratase	1	DISGPSPSK	DISGPS(UniMod:21)PSK	2	DISGPS(UniMod:21)PSK2	805222	836775	572459
O43719	O43719	HTSF1_HUMAN	HTATSF1	HIV Tat-specific factor 1	1	DLDEEGSEK	DLDEEGS(UniMod:21)EK	2	DLDEEGS(UniMod:21)EK2	1.26834e+06	1.3323e+06	1.25862e+06
O60763	O60763	USO1_HUMAN	USO1	General vesicular transport factor p115	1	DLGHPVEEEDELESGDQEDEDDESEDPGK	DLGHPVEEEDELES(UniMod:21)GDQEDEDDESEDPGK	3	DLGHPVEEEDELES(UniMod:21)GDQEDEDDESEDPGK3	914263	781207	891193
Q6PJT7	Q6PJT7;H0YJA2;G3V4R5;G3V411	ZC3HE_HUMAN	ZC3H14	Zinc finger CCCH domain-containing protein 14	1	DLVQPDKPASPK	DLVQPDKPAS(UniMod:21)PK	2	DLVQPDKPAS(UniMod:21)PK2	741712		588709
Q9BQG0	Q9BQG0	MBB1A_HUMAN	MYBBP1A	Myb-binding protein 1A	1	DPAQPMSPGEATQSGAR	DPAQPMS(UniMod:21)PGEATQSGAR	2	DPAQPMS(UniMod:21)PGEATQSGAR2	343844	402674	137252
Q12888	Q12888;A6NNK5	TP53B_HUMAN	TP53BP1	TP53-binding protein 1	1	DPVSPASQK	DPVS(UniMod:21)PASQK	2	DPVS(UniMod:21)PASQK2			416265
Q5T200	Q5T200;A0A7I2V4I5	ZC3HD_HUMAN	ZC3H13	Zinc finger CCCH domain-containing protein 13	1	DQRPSSPIR	DQRPSS(UniMod:21)PIR	2	DQRPSS(UniMod:21)PIR2	332124
P09601	P09601;A0A7I2V277;A0A7I2V3M0	HMOX1_HUMAN	HMOX1	Heme oxygenase 1	1	DQSPSRAPGLR	DQS(UniMod:21)PSRAPGLR	2	DQS(UniMod:21)PSRAPGLR2	931937	1.18007e+06	1.33832e+06
Q5JTV8	Q5JTV8;H0YDU3;A0A0A0MSK5;J3KN66	TOIP1_HUMAN	TOR1AIP1	Torsin-1A-interacting protein 1	1	DSHSSEEDEASSQTDLSQTISK	DSHS(UniMod:21)S(UniMod:21)EEDEASSQTDLSQTISK	3	DSHS(UniMod:21)S(UniMod:21)EEDEASSQTDLSQTISK3	654508		486416
Q9NVM9	Q9NVM9;H0YH12	INT13_HUMAN	INTS13	Integrator complex subunit 13	1	DSPDSPEPPNK	DSPDS(UniMod:21)PEPPNK	2	DSPDS(UniMod:21)PEPPNK2	490891	507605	482834
Q12906	Q12906	ILF3_HUMAN	ILF3	Interleukin enhancer-binding factor 3	1	DSSKGEDSAEETEAK	DSSKGEDS(UniMod:21)AEETEAK	2	DSSKGEDS(UniMod:21)AEETEAK2	2.7887e+06	932104	801176
P43243	A0A0R4J2E8;P43243;D6REM6;A8MXP9;B3KM87	MATR3_HUMAN	MATR3	Matrin-3	1	DTSENADGQSDENK	DTSENADGQS(UniMod:21)DENK	2	DTSENADGQS(UniMod:21)DENK2		274127	456416
P43243	A0A0R4J2E8;P43243;D6REM6;A8MXP9;B3KM87	MATR3_HUMAN	MATR3	Matrin-3	1	DTSENADGQSDENKDDYTIPDEYR	DTSENADGQS(UniMod:21)DENKDDYTIPDEYR	3	DTSENADGQS(UniMod:21)DENKDDYTIPDEYR3	882766	644657	859765
Q9H4L7	Q9H4L7;D6RAY8	SMRCD_HUMAN	SMARCAD1	SWI/SNF-related matrix-associated actin-dependent regulator of chromatin subfamily A containing DEAD/H box 1	1	DTVIIVSEPSEDEESQGLPTMAR	DTVIIVS(UniMod:21)EPS(UniMod:21)EDEESQGLPTMAR	3	DTVIIVS(UniMod:21)EPS(UniMod:21)EDEESQGLPTMAR3	113897
P38159	P38159;Q96E39;H0Y6E7;H3BT71;H3BUY5	RBMX_HUMAN	RBMX	RNA-binding motif protein, X chromosome	0	DVYLSPR	DVYLS(UniMod:21)PR	2	DVYLS(UniMod:21)PR2	635801	532223	441943
P38159	P38159;Q96E39;H0Y6E7;H3BT71;H3BUY5	RBMX_HUMAN	RBMX	RNA-binding motif protein, X chromosome	0	DVYLSPRDDGYSTK	DVYLS(UniMod:21)PRDDGYSTK	2	DVYLS(UniMod:21)PRDDGYSTK2	1.11894e+06		1.10985e+06
Q9P2I0	Q9P2I0	CPSF2_HUMAN	CPSF2	Cleavage and polyadenylation specificity factor subunit 2	1	EADIDSSDESDIEEDIDQPSAHK	EADIDS(UniMod:21)S(UniMod:21)DES(UniMod:21)DIEEDIDQPSAHK	3	EADIDS(UniMod:21)S(UniMod:21)DES(UniMod:21)DIEEDIDQPSAHK3		1.04634e+06
P55010	P55010	IF5_HUMAN	EIF5	Eukaryotic translation initiation factor 5	1	EAEEESSGGEEEDEDENIEVVYSK	EAEEES(UniMod:21)S(UniMod:21)GGEEEDEDENIEVVYSK	3	EAEEES(UniMod:21)S(UniMod:21)GGEEEDEDENIEVVYSK3	2.24913e+06		1.54174e+06
P07910	P07910;G3V2D6;G3V4C1;G3V2Q1	HNRPC_HUMAN	HNRNPC	Heterogeneous nuclear ribonucleoproteins C1/C2	1	EAEEGEDDRDSANGEDDS	EAEEGEDDRDS(UniMod:21)ANGEDDS	2	EAEEGEDDRDS(UniMod:21)ANGEDDS2	1.57453e+07	1.46024e+07	1.78328e+07
Q3KQU3	Q3KQU3;D3DPS3	MA7D1_HUMAN	MAP7D1	MAP7 domain-containing protein 1	1	EANANGSSPEPVK	EANANGSS(UniMod:21)PEPVK	2	EANANGSS(UniMod:21)PEPVK2	212093	158727	200931
Q8IYB3	Q8IYB3;M0R088;A9Z1X7	SRRM1_HUMAN	SRRM1	Serine/arginine repetitive matrix protein 1	1	EARSPQPNK	EARS(UniMod:21)PQPNK	2	EARS(UniMod:21)PQPNK2	96106.3	53364.1	95917.1
Q9C0C9	Q9C0C9;K7ES11	UBE2O_HUMAN	UBE2O	(E3-independent) E2 ubiquitin-conjugating enzyme	1	EDKPEGQSPVK	EDKPEGQS(UniMod:21)PVK	2	EDKPEGQS(UniMod:21)PVK2	151481	147856	178461
O75643	O75643;A0A494C1A5	U520_HUMAN	SNRNP200	U5 small nuclear ribonucleoprotein 200 kDa helicase	1	EEASDDDMEGDEAVVR	EEAS(UniMod:21)DDDMEGDEAVVR	2	EEAS(UniMod:21)DDDMEGDEAVVR2	434717	652756	306625
Q9H1E3	Q9H1E3	NUCKS_HUMAN	NUCKS1	Nuclear ubiquitous casein and cyclin-dependent kinase substrate 1	1	EEDEEPESPPEK	EEDEEPES(UniMod:21)PPEK	2	EEDEEPES(UniMod:21)PPEK2	4.26396e+06	7.62044e+06	7.52908e+06
P17096	P17096	HMGA1_HUMAN	HMGA1	High mobility group protein HMG-I/HMG-Y	1	EEEEGISQESSEEEQ	EEEEGISQES(UniMod:21)S(UniMod:21)EEEQ	2	EEEEGISQES(UniMod:21)S(UniMod:21)EEEQ2	5.10863e+06	3.65885e+06	4.5829e+06
Q8N1G4	Q8N1G4	LRC47_HUMAN	LRRC47	Leucine-rich repeat-containing protein 47	1	EEGSLSDTEADAVSGQLPDPTTNPSAGK	EEGSLS(UniMod:21)DTEADAVSGQLPDPTTNPSAGK	3	EEGSLS(UniMod:21)DTEADAVSGQLPDPTTNPSAGK3	2.21759e+06	2.5966e+06	2.55503e+06
Q99442	Q99442	SEC62_HUMAN	SEC62	Translocation protein SEC62	1	EELEQQTDGDCEEDEEEENDGETPK	EELEQQT(UniMod:21)DGDC(UniMod:4)EEDEEEENDGETPK	3	EELEQQT(UniMod:21)DGDC(UniMod:4)EEDEEEENDGETPK3			27945.2
Q9NR30	Q9NR30;A0A8I5KND9;A0A8I5KYZ4;A0A8I5KNN2;A0A8I5KNP3	DDX21_HUMAN	DDX21	Nucleolar RNA helicase 2	1	EEPSQNDISPK	EEPSQNDIS(UniMod:21)PK	2	EEPSQNDIS(UniMod:21)PK2	961192	1.59559e+06	1.74761e+06
Q99733	Q99733;C9J6D1;C9JZI7;E9PS34;E9PKT8;E9PNJ7;A8MXH2	NP1L4_HUMAN	NAP1L4	Nucleosome assembly protein 1-like 4	1	EFITGDVEPTDAESEWHSENEEEEK	EFITGDVEPTDAESEWHS(UniMod:21)ENEEEEK	3	EFITGDVEPTDAESEWHS(UniMod:21)ENEEEEK3	3.76909e+06	2.87078e+06	2.54072e+06
O00264	O00264	PGRC1_HUMAN	PGRMC1	Membrane-associated progesterone receptor component 1	1	EGEEPTVYSDEEEPK	EGEEPTVYS(UniMod:21)DEEEPK	2	EGEEPTVYS(UniMod:21)DEEEPK2			479174
Q15651	Q15651;A0A087WZE9	HMGN3_HUMAN	HMGN3	High mobility group nucleosome-binding domain-containing protein 3	1	EGTAPSENGETK	EGTAPS(UniMod:21)ENGETK	2	EGTAPS(UniMod:21)ENGETK2	343224	244893	242396
Q9H307	Q9H307	PININ_HUMAN	PNN	Pinin	1	EIAIVHSDAEK	EIAIVHS(UniMod:21)DAEK	2	EIAIVHS(UniMod:21)DAEK2	1.2185e+06	1.75279e+06	1.63363e+06
Q9BQG0	Q9BQG0;I3L1L3	MBB1A_HUMAN	MYBBP1A	Myb-binding protein 1A	1	EIPSATQSPISK	EIPSATQS(UniMod:21)PISK	2	EIPSATQS(UniMod:21)PISK2	1.15098e+06	1.24063e+06	1.08695e+06
P08238	P08238;Q58FF7	HS90B_HUMAN	HSP90AB1	Heat shock protein HSP 90-beta	0	EISDDEAEEEK	EIS(UniMod:21)DDEAEEEK	2	EIS(UniMod:21)DDEAEEEK2	9.10023e+07	1.08569e+08	1.25946e+08
O76021	O76021	RL1D1_HUMAN	RSL1D1	Ribosomal L1 domain-containing protein 1	1	EKSPSLGK	EKS(UniMod:21)PSLGK	2	EKS(UniMod:21)PSLGK2	268796
A0A0C4DFV9	A0A0C4DFV9	A0A0C4DFV9_HUMAN	SET	Protein SET	1	ELNSNHDGADETSEK	ELNSNHDGADETS(UniMod:21)EK	2	ELNSNHDGADETS(UniMod:21)EK2	2.11313e+06	1.55771e+06	3.81406e+06
O95453	O95453;A0A494C0W0;A0A494C0Q6;A0A494C0K5	PARN_HUMAN	PARN	Poly(A)-specific ribonuclease PARN	1	ELSPAGSISK	ELS(UniMod:21)PAGSISK	2	ELS(UniMod:21)PAGSISK2	266706	271214	207463
Q8TCJ2	Q8TCJ2	STT3B_HUMAN	STT3B	Dolichyl-diphosphooligosaccharide--protein glycosyltransferase subunit STT3B	1	ENPPVEDSSDEDDK	ENPPVEDS(UniMod:21)SDEDDK	2	ENPPVEDS(UniMod:21)SDEDDK2		1.03586e+06	758373
P23193	P23193;A0A1W2PRL9;E5RIS7;A0A1W2PPZ5	TCEA1_HUMAN	TCEA1	Transcription elongation factor A protein 1	1	EPAITSQNSPEAR	EPAITSQNS(UniMod:21)PEAR	2	EPAITSQNS(UniMod:21)PEAR2	2.5711e+06	3.16706e+06	3.75992e+06
P35659	P35659;H0Y8X0;A0A494C198;A0A494C028;B4DFG0;H0Y993;D6R9L5	DEK_HUMAN	DEK	Protein DEK	1	EPEMPGPREESEEEEDEDDEEEEEEEK	EPEMPGPREES(UniMod:21)EEEEDEDDEEEEEEEK	3	EPEMPGPREES(UniMod:21)EEEEDEDDEEEEEEEK3		2.11571e+06
P54105	P54105;E9PJF4	ICLN_HUMAN	CLNS1A	Methylosome subunit pICln	1	EPVADEEEEDSDDDVEPITEFR	EPVADEEEEDS(UniMod:21)DDDVEPITEFR	3	EPVADEEEEDS(UniMod:21)DDDVEPITEFR3	499034
Q9Y2V2	Q9Y2V2;H3BPY5;H3BTK3;H3BSW7;I3L3X8;H3BUY4;H3BNU9	CHSP1_HUMAN	CARHSP1	Calcium-regulated heat-stable protein 1	1	ERSPSPLR	ERS(UniMod:21)PS(UniMod:21)PLR	2	ERS(UniMod:21)PS(UniMod:21)PLR2	1.23392e+06	815768	912432
Q9BW71	Q9BW71	HIRP3_HUMAN	HIRIP3	HIRA-interacting protein 3	1	ESEQESEEEILAQK	ESEQES(UniMod:21)EEEILAQK	2	ESEQES(UniMod:21)EEEILAQK2	551292		629917
O75528	O75528	TADA3_HUMAN	TADA3	Transcriptional adapter 3	1	ESGADGASTSPR	ESGADGASTS(UniMod:21)PR	2	ESGADGASTS(UniMod:21)PR2	96720.7	87881.3
P25788	P25788;H0YJ03;G3V4X5	PSA3_HUMAN	PSMA3	Proteasome subunit alpha type-3	1	ESLKEEDESDDDNM	ESLKEEDES(UniMod:21)DDDNM	2	ESLKEEDES(UniMod:21)DDDNM2	1.43607e+06	3.35996e+06	3.2556e+06
Q04726	Q04726;H0YNT2;H0YKN8;H0YL70;H0YLW9;H0YLI3;H0YKT5;H0YKH0	TLE3_HUMAN	TLE3	Transducin-like enhancer protein 3	1	ESSANNSVSPSESLR	ESSANNSVS(UniMod:21)PSESLR	2	ESSANNSVS(UniMod:21)PSESLR2	642107	619388	688435
P27816	P27816;A0A804HKE7;E7EVA0	MAP4_HUMAN	MAP4	Microtubule-associated protein 4	1	ETERASPIK	ETERAS(UniMod:21)PIK	2	ETERAS(UniMod:21)PIK2	3.28572e+06	2.33185e+06	2.56001e+06
Q6PKG0	Q6PKG0;A0A0B4J210;H0YBW1;E5RH50;A0A8I5KWU3;A0A8I5KSP1	LARP1_HUMAN	LARP1	La-related protein 1	1	ETESAPGSPR	ETES(UniMod:21)APGS(UniMod:21)PR	2	ETES(UniMod:21)APGS(UniMod:21)PR2	1.05431e+06		1.08388e+06
Q6PKG0	Q6PKG0;A0A0B4J210;H0YBW1;E5RH50;A0A8I5KWU3;A0A8I5KSP1	LARP1_HUMAN	LARP1	La-related protein 1	1	ETESAPGSPR	ETESAPGS(UniMod:21)PR	2	ETESAPGS(UniMod:21)PR2		232225
P80723	P80723	BASP1_HUMAN	BASP1	Brain acid soluble protein 1	1	ETPAATEAPSSTPK	ETPAATEAPSS(UniMod:21)TPK	2	ETPAATEAPSS(UniMod:21)TPK2	175414	136177	173373
Q9UHB6	Q9UHB6;F8VS07;F8VQE1	LIMA1_HUMAN	LIMA1	LIM domain and actin-binding protein 1	1	ETPHSPGVEDAPIAK	ETPHS(UniMod:21)PGVEDAPIAK	2	ETPHS(UniMod:21)PGVEDAPIAK2	1.02463e+06	1.0954e+06	1.02396e+06
Q9UHB6	Q9UHB6;F8VS07;F8VQE1	LIMA1_HUMAN	LIMA1	LIM domain and actin-binding protein 1	1	ETPHSPGVEDAPIAK	ETPHS(UniMod:21)PGVEDAPIAK	3	ETPHS(UniMod:21)PGVEDAPIAK3	1.17103e+06	1.42357e+06	1.41837e+06
Q9NYF8	Q9NYF8;A0A1W2PQ43;E9PK91;E9PK09;E9PKI6;E9PQN2	BCLF1_HUMAN	BCLAF1	Bcl-2-associated transcription factor 1	1	ETQSPEQVK	ETQS(UniMod:21)PEQVK	2	ETQS(UniMod:21)PEQVK2	2.37985e+06	2.01876e+06	2.79487e+06
O75475	O75475	PSIP1_HUMAN	PSIP1	PC4 and SFRS1-interacting protein	1	ETSVSKEDTDHEEK	ETS(UniMod:21)VSKEDTDHEEK	3	ETS(UniMod:21)VSKEDTDHEEK3	313268	418167
P19338	P19338;A0A7I2V3F3;A0A7I2V349;H7BY16;A0A7I2V2S8;A0A7I2V5M5;A0A7I2V506;A0A7I2V2U7;C9JLB1;A0A7I2V699;A0A7I2V428	NUCL_HUMAN	NCL	Nucleolin	1	EVEEDSEDEEMSEDEEDDSSGEEVVIPQK	EVEEDS(UniMod:21)EDEEMS(UniMod:21)EDEEDDSS(UniMod:21)GEEVVIPQK	3	EVEEDS(UniMod:21)EDEEMS(UniMod:21)EDEEDDSS(UniMod:21)GEEVVIPQK3	4.33474e+06
P19338	P19338;A0A7I2V3F3;A0A7I2V349;H7BY16;A0A7I2V2S8;A0A7I2V5M5;A0A7I2V506;A0A7I2V2U7;C9JLB1;A0A7I2V699;A0A7I2V428	NUCL_HUMAN	NCL	Nucleolin	1	EVEEDSEDEEMSEDEEDDSSGEEVVIPQK	EVEEDSEDEEMS(UniMod:21)EDEEDDS(UniMod:21)S(UniMod:21)GEEVVIPQK	3	EVEEDSEDEEMS(UniMod:21)EDEEDDS(UniMod:21)S(UniMod:21)GEEVVIPQK3		3.9031e+06	2.68894e+06
P07900	P07900;G3V2J8	HS90A_HUMAN	HSP90AA1	Heat shock protein HSP 90-alpha	1	EVSDDEAEEK	EVS(UniMod:21)DDEAEEK	2	EVS(UniMod:21)DDEAEEK2	328475	322453	814911
P22234	P22234;E9PBS1	PUR6_HUMAN	PAICS	Bifunctional phosphoribosylaminoimidazole carboxylase/phosphoribosylaminoimidazole succinocarboxamide synthetase	1	EVYELLDSPGK	EVYELLDS(UniMod:21)PGK	2	EVYELLDS(UniMod:21)PGK2	655486		296897
P54105	P54105;E9PJF4	ICLN_HUMAN	CLNS1A	Methylosome subunit pICln	1	FEEESKEPVADEEEEDSDDDVEPITEFR	FEEESKEPVADEEEEDS(UniMod:21)DDDVEPITEFR	3	FEEESKEPVADEEEEDS(UniMod:21)DDDVEPITEFR3	3.48214e+06	2.96364e+06	1.86993e+06
Q9NYF8	Q9NYF8;A0A1W2PQ43;E9PK91;E9PK09;E9PKI6;E9PQN2	BCLF1_HUMAN	BCLAF1	Bcl-2-associated transcription factor 1	1	FNDSEGDDTEETEDYR	FNDS(UniMod:21)EGDDTEETEDYR	2	FNDS(UniMod:21)EGDDTEETEDYR2	1.31013e+06	1.24604e+06	1.17259e+06
P46821	P46821	MAP1B_HUMAN	MAP1B	Microtubule-associated protein 1B	1	GEAEQSEEEADEEDK	GEAEQS(UniMod:21)EEEADEEDK	2	GEAEQS(UniMod:21)EEEADEEDK2	304555	470998	874927
Q12906	Q12906	ILF3_HUMAN	ILF3	Interleukin enhancer-binding factor 3	1	GEDSAEETEAK	GEDS(UniMod:21)AEETEAK	2	GEDS(UniMod:21)AEETEAK2	1.89815e+06	2.38697e+06	3.70643e+06
Q6PD62	Q6PD62	CTR9_HUMAN	CTR9	RNA polymerase-associated protein CTR9 homolog	1	GEEGSDDDETENGPK	GEEGS(UniMod:21)DDDETENGPK	2	GEEGS(UniMod:21)DDDETENGPK2	269272		583664
Q9UQ35	Q9UQ35	SRRM2_HUMAN	SRRM2	Serine/arginine repetitive matrix protein 2	1	GEFSASPMLK	GEFSAS(UniMod:21)PMLK	2	GEFSAS(UniMod:21)PMLK2		349771
Q9UQ35	Q9UQ35;I3L4D8;I3L182;A0A087X1W1;I3L1I8	SRRM2_HUMAN	SRRM2	Serine/arginine repetitive matrix protein 2	1	GEGDAPFSEPGTTSTQRPSSPETATK	GEGDAPFSEPGTTSTQRPS(UniMod:21)SPETATK	3	GEGDAPFSEPGTTSTQRPS(UniMod:21)SPETATK3	1.31541e+06	1.26225e+06	984714
P49006	P49006	MRP_HUMAN	MARCKSL1	MARCKS-related protein	1	GEVPPKETPK	GEVPPKET(UniMod:21)PK	2	GEVPPKET(UniMod:21)PK2	450770	220422	269595
P30419	P30419;A0A7I2V3M5;A0A7I2V3X4;A0A7I2V4Y5;K7EN42;A0A7I2V3U5;A0A7I2V539;B7Z8J4	NMT1_HUMAN	NMT1	Glycylpeptide N-tetradecanoyltransferase 1	1	GGLSPANDTGAK	GGLS(UniMod:21)PANDTGAK	2	GGLS(UniMod:21)PANDTGAK2	1.68422e+06	1.8178e+06	1.62507e+06
Q5STZ8	Q8NE71;Q5STZ8;F5GYK6;A0A0G2JJB9	Q5STZ8_HUMAN	ABCF1	ATP-binding cassette sub-family F member 1	1	GGNVFAALIQDQSEEEEEEEK	GGNVFAALIQDQS(UniMod:21)EEEEEEEK	3	GGNVFAALIQDQS(UniMod:21)EEEEEEEK3	455566	698162	376244
Q09666	Q09666	AHNK_HUMAN	AHNAK	Neuroblast differentiation-associated protein AHNAK	1	GGVTGSPEASISGSK	GGVTGS(UniMod:21)PEASISGSK	2	GGVTGS(UniMod:21)PEASISGSK2	2.99052e+06	3.12952e+06	3.2496e+06
Q09666	Q09666	AHNK_HUMAN	AHNAK	Neuroblast differentiation-associated protein AHNAK	1	GHYEVTGSDDETGK	GHYEVTGS(UniMod:21)DDETGK	2	GHYEVTGS(UniMod:21)DDETGK2	1.6436e+06	2.0693e+06	2.09072e+06
O75821	O75821;K7EL20;K7ENA8;K7EL60;K7ER90	EIF3G_HUMAN	EIF3G	Eukaryotic translation initiation factor 3 subunit G	1	GIPLATGDTSPEPELLPGAPLPPPK	GIPLATGDT(UniMod:21)SPEPELLPGAPLPPPK	3	GIPLATGDT(UniMod:21)SPEPELLPGAPLPPPK3	345690		237150
Q9NXV6	Q9NXV6	CARF_HUMAN	CDKN2AIP	CDKN2A-interacting protein	1	GISSSNEGVEEPSK	GIS(UniMod:21)SSNEGVEEPSK	2	GIS(UniMod:21)SSNEGVEEPSK2	130580
P17480	P17480;E9PLT2;E9PKP7	UBF1_HUMAN	UBTF	Nucleolar transcription factor 1	1	GKLPESPK	GKLPES(UniMod:21)PK	2	GKLPES(UniMod:21)PK2	318744	311205	195140
Q9P206	Q9P206	K1522_HUMAN	KIAA1522	Uncharacterized protein KIAA1522	1	GLAGPPASPGK	GLAGPPAS(UniMod:21)PGK	2	GLAGPPAS(UniMod:21)PGK2	223598	179541
Q13425	Q13425;A0A140TA73	SNTB2_HUMAN	SNTB2	Beta-2-syntrophin	1	GLGPPSPPAPPR	GLGPPS(UniMod:21)PPAPPR	2	GLGPPS(UniMod:21)PPAPPR2		189294
Q5JTV8	Q5JTV8;H0YDU3;A0A0A0MSK5;J3KN66	TOIP1_HUMAN	TOR1AIP1	Torsin-1A-interacting protein 1	1	GLRDSHSSEEDEASSQTDLSQTISK	GLRDS(UniMod:21)HS(UniMod:21)S(UniMod:21)EEDEASSQTDLSQTISK	3	GLRDS(UniMod:21)HS(UniMod:21)S(UniMod:21)EEDEASSQTDLSQTISK3	3.5768e+06	1.77381e+06	2.48128e+06
P51858	P51858	HDGF_HUMAN	HDGF	Hepatoma-derived growth factor	1	GNAEGSSDEEGK	GNAEGS(UniMod:21)S(UniMod:21)DEEGK	2	GNAEGS(UniMod:21)S(UniMod:21)DEEGK2	442698	393710	545958
P49736	P49736;C9J013;F8WDM3;C9JZ21	MCM2_HUMAN	MCM2	DNA replication licensing factor MCM2	1	GNDPLTSSPGR	GNDPLTSS(UniMod:21)PGR	2	GNDPLTSS(UniMod:21)PGR2	3.62463e+06	3.65208e+06	3.6602e+06
O75351	O75351;K7EKZ3	VPS4B_HUMAN	VPS4B	Vacuolar protein sorting-associated protein 4B	1	GNDSDGEGESDDPEK	GNDS(UniMod:21)DGEGESDDPEK	2	GNDS(UniMod:21)DGEGESDDPEK2	442441	405466	649290
Q9Y2V2	Q9Y2V2;H3BPY5;H3BTK3;H3BSW7;I3L3X8;H3BUY4;H3BNU9	CHSP1_HUMAN	CARHSP1	Calcium-regulated heat-stable protein 1	1	GNVVPSPLPTR	GNVVPS(UniMod:21)PLPTR	2	GNVVPS(UniMod:21)PLPTR2	868146		566625
Q96ST2	Q96ST2	IWS1_HUMAN	IWS1	Protein IWS1 homolog	1	GPASDSETEDASR	GPAS(UniMod:21)DS(UniMod:21)ETEDASR	2	GPAS(UniMod:21)DS(UniMod:21)ETEDASR2	475237	491701	623777
O95400	O95400	CD2B2_HUMAN	CD2BP2	CD2 antigen cytoplasmic tail-binding protein 2	1	GPGQPSSPQR	GPGQPSS(UniMod:21)PQR	2	GPGQPSS(UniMod:21)PQR2	264369	286734	436221
P42166;P42167	P42166;P42167;G5E972	LAP2A_HUMAN;LAP2B_HUMAN	TMPO	Lamina-associated polypeptide 2, isoform alpha	1	GPPDFSSDEEREPTPVLGSGAAAAGR	GPPDFS(UniMod:21)S(UniMod:21)DEEREPTPVLGSGAAAAGR	3	GPPDFS(UniMod:21)S(UniMod:21)DEEREPTPVLGSGAAAAGR3
P42166;P42167	P42166;P42167;G5E972	LAP2A_HUMAN;LAP2B_HUMAN	TMPO	Lamina-associated polypeptide 2, isoform alpha	1	GPPDFSSDEEREPTPVLGSGAAAAGR	GPPDFS(UniMod:21)SDEEREPT(UniMod:21)PVLGSGAAAAGR	3	GPPDFS(UniMod:21)SDEEREPT(UniMod:21)PVLGSGAAAAGR3	1.29637e+06
P42166;P42167	P42166;P42167;G5E972	LAP2A_HUMAN;LAP2B_HUMAN	TMPO	Lamina-associated polypeptide 2, isoform alpha	1	GPPDFSSDEEREPTPVLGSGAAAAGR	GPPDFSS(UniMod:21)DEEREPT(UniMod:21)PVLGSGAAAAGR	3	GPPDFSS(UniMod:21)DEEREPT(UniMod:21)PVLGSGAAAAGR3		1.09931e+06
P46087	P46087	NOP2_HUMAN	NOP2	Probable 28S rRNA (cytosine(4447)-C(5))-methyltransferase	1	GPQPPTVSPIR	GPQPPTVS(UniMod:21)PIR	2	GPQPPTVS(UniMod:21)PIR2	683553	625925	582977
Q96JM3	Q96JM3	CHAP1_HUMAN	CHAMP1	Chromosome alignment-maintaining phosphoprotein 1	1	GQESSSDQEQVDVESIDFSK	GQES(UniMod:21)S(UniMod:21)SDQEQVDVESIDFSK	3	GQES(UniMod:21)S(UniMod:21)SDQEQVDVESIDFSK3	242469
H3BQJ5	H3BQJ5	H3BQJ5_HUMAN	NOL3	Nucleolar protein 3 (Fragment)	1	GQSVWRGR	GQS(UniMod:21)VWRGR	2	GQS(UniMod:21)VWRGR2	1.86589e+06
Q8WXI9	Q8WXI9;A0A0U1RR34;A0A0U1RRM1;A0A0U1RRK3	P66B_HUMAN	GATAD2B	Transcriptional repressor p66-beta	1	GRLTPSPDIIVLSDNEASSPR	GRLT(UniMod:21)PS(UniMod:21)PDIIVLS(UniMod:21)DNEASSPR	3	GRLT(UniMod:21)PS(UniMod:21)PDIIVLS(UniMod:21)DNEASSPR3		257464
Q9UN37	Q9UN37;I3L4J1	VPS4A_HUMAN	VPS4A	Vacuolar protein sorting-associated protein 4A	1	GSDSDSEGDNPEK	GS(UniMod:21)DSDSEGDNPEK	2	GS(UniMod:21)DSDSEGDNPEK2		131440	219472
Q9Y6D5	Q9Y6D5;A0A7P0T9L6;A0A7P0T9L9;A0A7P0Z446;A0A7P0T7Z2;A0A7P0TA34	BIG2_HUMAN	ARFGEF2	Brefeldin A-inhibited guanine nucleotide-exchange protein 2	1	GSSLSGTDDGAQEVVK	GS(UniMod:21)SLSGTDDGAQEVVK	2	GS(UniMod:21)SLSGTDDGAQEVVK2	304149	289261
Q9Y2W1	Q9Y2W1;A0A3B3ITZ9	TR150_HUMAN	THRAP3	Thyroid hormone receptor-associated protein 3	1	GSFSDTGLGDGK	GSFS(UniMod:21)DTGLGDGK	2	GSFS(UniMod:21)DTGLGDGK2	442931	381913	483443
Q7Z6Z7	Q7Z6Z7	HUWE1_HUMAN	HUWE1	E3 ubiquitin-protein ligase HUWE1	1	GSGTASDDEFENLR	GSGTAS(UniMod:21)DDEFENLR	2	GSGTAS(UniMod:21)DDEFENLR2	1.09251e+06	916485	1.12107e+06
P11388	P11388	TOP2A_HUMAN	TOP2A	DNA topoisomerase 2-alpha	1	GSVPLSSSPPATHFPDETEITNPVPK	GSVPLSS(UniMod:21)SPPATHFPDETEITNPVPK	3	GSVPLSS(UniMod:21)SPPATHFPDETEITNPVPK3	1.11459e+06	1.56508e+06	855033
P10412	Q02539;P16403;P16401;P22492;P10412;P16402	H14_HUMAN	H1-4	Histone H1.4	0	GTGASGSFK	GTGASGS(UniMod:21)FK	2	GTGASGS(UniMod:21)FK2	994065	1.86705e+06	1.36411e+06
P52594	P52594;B8ZZY2;C9J2I0	AGFG1_HUMAN	AGFG1	Arf-GAP domain and FG repeat-containing protein 1	1	GTPSQSPVVGR	GTPSQS(UniMod:21)PVVGR	2	GTPSQS(UniMod:21)PVVGR2	1.28756e+06	1.34916e+06	1.39094e+06
Q8N1F7	Q8N1F7;H3BVG0	NUP93_HUMAN	NUP93	Nuclear pore complex protein Nup93	1	GTSPSSSSRPQR	GTS(UniMod:21)PSSSSRPQR	2	GTS(UniMod:21)PSSSSRPQR2	1.28511e+06	881899	1.29109e+06
Q9Y4P8	Q9Y4P8	WIPI2_HUMAN	WIPI2	WD repeat domain phosphoinositide-interacting protein 2	1	GTYVPSSPTR	GTYVPSS(UniMod:21)PTR	2	GTYVPSS(UniMod:21)PTR2			111366
Q01518	Q01518;Q5T0R9;Q5T0R7;Q5T0R4;Q5T0R2;Q5T0R8;Q5T0R6;Q5T0R1;Q5T0R5;Q5T0R3;Q5T0S3	CAP1_HUMAN	CAP1	Adenylyl cyclase-associated protein 1	1	GYADSPSK	GYADS(UniMod:21)PSK	2	GYADS(UniMod:21)PSK2	305402	350480	183830
P13051	P13051	UNG_HUMAN	UNG	Uracil-DNA glycosylase	1	HAPSPEPAVQGTGVAGVPEESGDAAAIPAK	HAPS(UniMod:21)PEPAVQGTGVAGVPEESGDAAAIPAK	3	HAPS(UniMod:21)PEPAVQGTGVAGVPEESGDAAAIPAK3	528000
P31948	P31948;H0YGI8	STIP1_HUMAN	STIP1	Stress-induced-phosphoprotein 1	1	HDSPEDVK	HDS(UniMod:21)PEDVK	2	HDS(UniMod:21)PEDVK2	1.1896e+06	1.07046e+06	1.08112e+06
Q9UQ35	Q9UQ35;I3L4D8;I3L182	SRRM2_HUMAN	SRRM2	Serine/arginine repetitive matrix protein 2	1	HGGSPQPLATTPLSQEPVNPPSEASPTR	HGGS(UniMod:21)PQPLATTPLSQEPVNPPSEAS(UniMod:21)PTR	3	HGGS(UniMod:21)PQPLATTPLSQEPVNPPSEAS(UniMod:21)PTR3	494594	494360	671129
Q9NYV4	Q9NYV4;J3QSD7	CDK12_HUMAN	CDK12	Cyclin-dependent kinase 12	1	HLLTDLPLPPELPGGDLSPPDSPEPK	HLLTDLPLPPELPGGDLS(UniMod:21)PPDS(UniMod:21)PEPK	3	HLLTDLPLPPELPGGDLS(UniMod:21)PPDS(UniMod:21)PEPK3		29528
Q8IYB3	Q8IYB3;M0R088;A9Z1X7	SRRM1_HUMAN	SRRM1	Serine/arginine repetitive matrix protein 1	1	HRPSPPATPPPK	HRPS(UniMod:21)PPAT(UniMod:21)PPPK	3	HRPS(UniMod:21)PPAT(UniMod:21)PPPK3	1.0983e+06
Q8WX93	Q8WX93;A0A3B3ISX8	PALLD_HUMAN	PALLD	Palladin	1	IASDEEIQGTK	IASDEEIQGT(UniMod:21)K	2	IASDEEIQGT(UniMod:21)K2	1.64024e+06	1.64791e+06	1.71237e+06
Q8TDD1	Q8TDD1	DDX54_HUMAN	DDX54	ATP-dependent RNA helicase DDX54	1	IDDRDSDEEGASDR	IDDRDS(UniMod:21)DEEGASDR	2	IDDRDS(UniMod:21)DEEGASDR2	641214		929094
Q12888	Q12888;A6NNK5;C9JXV0	TP53B_HUMAN	TP53BP1	TP53-binding protein 1	1	IDEDGENTQIEDTEPMSPVLNSK	IDEDGENTQIEDTEPMS(UniMod:21)PVLNSK	3	IDEDGENTQIEDTEPMS(UniMod:21)PVLNSK3	481097	496384
Q32MZ4	Q32MZ4	LRRF1_HUMAN	LRRFIP1	Leucine-rich repeat flightless-interacting protein 1	1	IDGATQSSPAEPK	IDGATQS(UniMod:21)SPAEPK	2	IDGATQS(UniMod:21)SPAEPK2	505445	522452	301279
Q9NYF8	Q9NYF8;A0A1W2PQ43;E9PK91;E9PK09;E9PKI6;E9PQN2	BCLF1_HUMAN	BCLAF1	Bcl-2-associated transcription factor 1	1	IDISPSTLR	IDIS(UniMod:21)PSTLR	2	IDIS(UniMod:21)PSTLR2	551363
P08238	P08238;Q58FF8	HS90B_HUMAN	HSP90AB1	Heat shock protein HSP 90-beta	0	IEDVGSDEEDDSGK	IEDVGS(UniMod:21)DEEDDSGK	2	IEDVGS(UniMod:21)DEEDDSGK2	1.34866e+08	1.42099e+08	1.76154e+08
P41236;Q6NXS1	P41236;Q6NXS1;E7EMN6	IPP2B_HUMAN;IPP2_HUMAN	PPP1R2;PPP1R2B	Protein phosphatase inhibitor 2	0	IQEQESSGEEDSDLSPEER	IQEQES(UniMod:21)S(UniMod:21)GEEDSDLSPEER	3	IQEQES(UniMod:21)S(UniMod:21)GEEDSDLSPEER3	625397	470348	571674
P41236;Q6NXS1	P41236;Q6NXS1;E7EMN6	IPP2B_HUMAN;IPP2_HUMAN	PPP1R2;PPP1R2B	Protein phosphatase inhibitor 2	0	IQEQESSGEEDSDLSPEEREK	IQEQES(UniMod:21)S(UniMod:21)GEEDSDLSPEEREK	3	IQEQES(UniMod:21)S(UniMod:21)GEEDSDLSPEEREK3	198823
Q8WVC0	Q8WVC0	LEO1_HUMAN	LEO1	RNA polymerase-associated protein LEO1	1	IQNSDDEER	IQNS(UniMod:21)DDEER	2	IQNS(UniMod:21)DDEER2		151790
P49674	P49674;H0Y682;H0Y5S9	KC1E_HUMAN	CSNK1E	Casein kinase I isoform epsilon	1	IQPAGNTSPR	IQPAGNTS(UniMod:21)PR	2	IQPAGNTS(UniMod:21)PR2	446393	477932	495909
P55081	P55081	MFAP1_HUMAN	MFAP1	Microfibrillar-associated protein 1	1	IVEPEVVGESDSEVEGDAWR	IVEPEVVGES(UniMod:21)DS(UniMod:21)EVEGDAWR	3	IVEPEVVGES(UniMod:21)DS(UniMod:21)EVEGDAWR3	890356	855873	695936
O00264	O00264	PGRC1_HUMAN	PGRMC1	Membrane-associated progesterone receptor component 1	1	IVRGDQPAASGDSDDDEPPPLPR	IVRGDQPAASGDS(UniMod:21)DDDEPPPLPR	3	IVRGDQPAASGDS(UniMod:21)DDDEPPPLPR3			912110
Q13627;Q9Y463	Q13627;Q9Y463;A0A2R8YDF3;A0A2R8Y6L5;A0A2R8Y443;A0A2R8Y6I6	DYR1A_HUMAN;DYR1B_HUMAN	DYRK1A;DYRK1B	Dual specificity tyrosine-phosphorylation-regulated kinase 1A	0	IYQYIQSR	IYQYIQS(UniMod:21)R	2	IYQYIQS(UniMod:21)R2	337431	288617	340662
Q9NYF8	Q9NYF8;A0A1W2PQ43;E9PK91;E9PK09;E9PKI6;E9PJA7;E9PQN2	BCLF1_HUMAN	BCLAF1	Bcl-2-associated transcription factor 1	1	KAEGEPQEESPLK	KAEGEPQEES(UniMod:21)PLK	2	KAEGEPQEES(UniMod:21)PLK2	4.07429e+06	4.65059e+06	4.27665e+06
Q9NYF8	Q9NYF8;A0A1W2PQ43;E9PK91;E9PK09;E9PKI6;E9PQN2	BCLF1_HUMAN	BCLAF1	Bcl-2-associated transcription factor 1	1	KETQSPEQVK	KETQS(UniMod:21)PEQVK	2	KETQS(UniMod:21)PEQVK2	1.82401e+06	1.4317e+06	1.61881e+06
P35579	P35579;A0A8I5KWT8	MYH9_HUMAN	MYH9	Myosin-9	1	KGAGDGSDEEVDGK	KGAGDGS(UniMod:21)DEEVDGK	2	KGAGDGS(UniMod:21)DEEVDGK2	1.26476e+07	7.57883e+06	5.90819e+06
O95400	O95400	CD2B2_HUMAN	CD2BP2	CD2 antigen cytoplasmic tail-binding protein 2	1	KGPGQPSSPQR	KGPGQPSS(UniMod:21)PQR	2	KGPGQPSS(UniMod:21)PQR2	390362
Q7Z4S6	Q7Z4S6;A0A1B0GV47;H0YHT2;H0YI78	KI21A_HUMAN	KIF21A	Kinesin-like protein KIF21A	1	KIPEPSPVTR	KIPEPS(UniMod:21)PVTR	2	KIPEPS(UniMod:21)PVTR2	304626
Q13428	Q13428;E7ETY2;A0A6I8PRA0;A0A3B3IS06	TCOF_HUMAN	TCOF1	Treacle protein	1	KLSGDQPAAR	KLS(UniMod:21)GDQPAAR	2	KLS(UniMod:21)GDQPAAR2	269311
O14828	O14828	SCAM3_HUMAN	SCAMP3	Secretory carrier-associated membrane protein 3	1	KLSPTEPK	KLS(UniMod:21)PTEPK	2	KLS(UniMod:21)PTEPK2		326575
Q7Z4S6	Q7Z4S6;A0A1B0GV47;H0YIM6;H0YHT2	KI21A_HUMAN	KIF21A	Kinesin-like protein KIF21A	1	KLSSSDAPAQDTGSSAAAVETDASR	KLSSS(UniMod:21)DAPAQDTGSSAAAVETDASR	3	KLSSS(UniMod:21)DAPAQDTGSSAAAVETDASR3	272660	332500
Q8WVC0	Q8WVC0	LEO1_HUMAN	LEO1	RNA polymerase-associated protein LEO1	1	KLTSDEEGEPSGK	KLTS(UniMod:21)DEEGEPSGK	2	KLTS(UniMod:21)DEEGEPSGK2	1.09266e+06	925695	1.36185e+06
P29692	P29692;E9PI39;E9PRY8;E9PK01;E9PQZ1;A0A087X1X7;E9PQ49;E9PL71	EF1D_HUMAN	EEF1D	Elongation factor 1-delta	1	KPATPAEDDEDDDIDLFGSDNEEEDK	KPAT(UniMod:21)PAEDDEDDDIDLFGS(UniMod:21)DNEEEDK	3	KPAT(UniMod:21)PAEDDEDDDIDLFGS(UniMod:21)DNEEEDK3		7.86715e+06	8.03977e+06
P29692	P29692;E9PI39;E9PRY8;E9PK01;E9PQZ1;A0A087X1X7;E9PQ49;E9PL71	EF1D_HUMAN	EEF1D	Elongation factor 1-delta	1	KPATPAEDDEDDDIDLFGSDNEEEDK	KPATPAEDDEDDDIDLFGS(UniMod:21)DNEEEDK	3	KPATPAEDDEDDDIDLFGS(UniMod:21)DNEEEDK3	2.81613e+07	1.8571e+07
Q8IYB3	Q8IYB3;A9Z1X7	SRRM1_HUMAN	SRRM1	Serine/arginine repetitive matrix protein 1	1	KPPAPPSPVQSQSPSTNWSPAVPVK	KPPAPPS(UniMod:21)PVQSQS(UniMod:21)PSTNWSPAVPVK	3	KPPAPPS(UniMod:21)PVQSQS(UniMod:21)PSTNWSPAVPVK3	1.02416e+06	1.00673e+06	1.09149e+06
Q9H1E3	Q9H1E3	NUCKS_HUMAN	NUCKS1	Nuclear ubiquitous casein and cyclin-dependent kinase substrate 1	1	KTSTSPPPEK	KTSTS(UniMod:21)PPPEK	2	KTSTS(UniMod:21)PPPEK2	2.26845e+06	1.21283e+06	475845
Q6NUQ4	Q6NUQ4;H7C0H8	TM214_HUMAN	TMEM214	Transmembrane protein 214	1	KVATPPNQNQK	KVAT(UniMod:21)PPNQNQK	2	KVAT(UniMod:21)PPNQNQK2	383746	270208
Q9P2E9	Q9P2E9;A2A2S5	RRBP1_HUMAN	RRBP1	Ribosome-binding protein 1	1	KVDTTPNQGK	KVDTT(UniMod:21)PNQGK	2	KVDTT(UniMod:21)PNQGK2	520782	398350	362656
Q8IYB3	Q8IYB3;M0R088;A9Z1X7	SRRM1_HUMAN	SRRM1	Serine/arginine repetitive matrix protein 1	1	KVELSESEEDK	KVELS(UniMod:21)ES(UniMod:21)EEDK	2	KVELS(UniMod:21)ES(UniMod:21)EEDK2	3.30677e+06	2.70806e+06	2.8488e+06
P19338	P19338;A0A7I2V3F3;A0A7I2V349;H7BY16;A0A7I2V2S8;A0A7I2V5M5;A0A7I2V506;A0A7I2V2U7;C9JLB1;A0A7I2V699;A0A7I2V428	NUCL_HUMAN	NCL	Nucleolin	1	KVVVSPTK	KVVVS(UniMod:21)PTK	2	KVVVS(UniMod:21)PTK2	5.19906e+06	3.15963e+06	933349
Q9UIG0	Q9UIG0	BAZ1B_HUMAN	BAZ1B	Tyrosine-protein kinase BAZ1B	1	LAEDEGDSEPEAVGQSR	LAEDEGDS(UniMod:21)EPEAVGQSR	3	LAEDEGDS(UniMod:21)EPEAVGQSR3	161787	222339
Q5JTV8	Q5JTV8;J3KN66	TOIP1_HUMAN	TOR1AIP1	Torsin-1A-interacting protein 1	1	LAPQNGGSSDAPAYR	LAPQNGGS(UniMod:21)SDAPAYR	2	LAPQNGGS(UniMod:21)SDAPAYR2
Q13428	Q13428;E7ETY2;A0A6I8PRA0;A0A3B3IS06	TCOF_HUMAN	TCOF1	Treacle protein	1	LDSSPSVSSTLAAK	LDSS(UniMod:21)PSVSSTLAAK	2	LDSS(UniMod:21)PSVSSTLAAK2	559359	557407	403374
Q9Y294	Q9Y294	ASF1A_HUMAN	ASF1A	Histone chaperone ASF1A	1	LEDAESSNPNLQSLLSTDALPSASK	LEDAESS(UniMod:21)NPNLQSLLSTDALPSASK	3	LEDAESS(UniMod:21)NPNLQSLLSTDALPSASK3		176107
O43719	O43719	HTSF1_HUMAN	HTATSF1	HIV Tat-specific factor 1	1	LFEDDDSNEK	LFEDDDS(UniMod:21)NEK	2	LFEDDDS(UniMod:21)NEK2	1.02733e+06	1.21657e+06	1.21601e+06
Q13428	Q13428;E7ETY2;A0A6I8PRA0;A0A3B3IS06	TCOF_HUMAN	TCOF1	Treacle protein	1	LGAGEGGEASVSPEK	LGAGEGGEASVS(UniMod:21)PEK	2	LGAGEGGEASVS(UniMod:21)PEK2	1.21961e+06	1.42895e+06	1.50248e+06
Q9UNE7	Q9UNE7;H3BS86	CHIP_HUMAN	STUB1	E3 ubiquitin-protein ligase CHIP	1	LGAGGGSPEK	LGAGGGS(UniMod:21)PEK	2	LGAGGGS(UniMod:21)PEK2	1.17947e+06	1.39584e+06	1.2793e+06
Q9Y4F1	Q9Y4F1;M0QYB0;A0A1B0GV68;C9JME2	FARP1_HUMAN	FARP1	FERM, ARHGEF and pleckstrin domain-containing protein 1	1	LGAPENSGISTLER	LGAPENSGIS(UniMod:21)TLER	2	LGAPENSGIS(UniMod:21)TLER2	663255		502866
Q07002	Q07002;A0A0A0MSJ6	CDK18_HUMAN	CDK18	Cyclin-dependent kinase 18	1	LGEGTYATVFK	LGEGT(UniMod:21)YAT(UniMod:21)VFK	2	LGEGT(UniMod:21)YAT(UniMod:21)VFK2	1.76449e+06	1.55344e+06	2.05362e+06
Q07002	Q07002;A0A0A0MSJ6	CDK18_HUMAN	CDK18	Cyclin-dependent kinase 18	1	LGEGTYATVFK	LGEGTY(UniMod:21)ATVFK	2	LGEGTY(UniMod:21)ATVFK2	467647		436195
P06239;P06241;P07947;P12931	P06239;P06241;P12931;P07947;Q573B4;J3QRU1	FYN_HUMAN;LCK_HUMAN;SRC_HUMAN;YES_HUMAN	FYN;LCK;SRC;YES1	Tyrosine-protein kinase Lck	0	LIEDNEYTAR	LIEDNEY(UniMod:21)TAR	2	LIEDNEY(UniMod:21)TAR2	272470		255659
Q03252	Q03252;P20700	LMNB2_HUMAN	LMNB2	Lamin-B2	0	LKLSPSPSSR	LKLS(UniMod:21)PS(UniMod:21)PSSR	2	LKLS(UniMod:21)PS(UniMod:21)PSSR2	3.34577e+06	2.4969e+06	2.24796e+06
Q03252	Q03252;P20700	LMNB2_HUMAN	LMNB2	Lamin-B2	0	LKLSPSPSSR	LKLS(UniMod:21)PSPSSR	2	LKLS(UniMod:21)PSPSSR2	1.09373e+06	1.13098e+06
Q13464	Q13464	ROCK1_HUMAN	ROCK1	Rho-associated protein kinase 1	1	LLDLSDSTSVASFPSADETDGNLPESR	LLDLSDSTSVAS(UniMod:21)FPS(UniMod:21)ADETDGNLPESR	3	LLDLSDSTSVAS(UniMod:21)FPS(UniMod:21)ADETDGNLPESR3		27392.8
O60231	O60231;A0A140T947;A2AB15	DHX16_HUMAN	DHX16	Pre-mRNA-splicing factor ATP-dependent RNA helicase DHX16	1	LLEDSEESSEETVSR	LLEDS(UniMod:21)EES(UniMod:21)SEETVSR	2	LLEDS(UniMod:21)EES(UniMod:21)SEETVSR2	1.11511e+06	795022	843700
Q5T8P6	Q5T8P6;A0A087X0H9	RBM26_HUMAN	RBM26	RNA-binding protein 26	1	LNHSPPQSSSR	LNHS(UniMod:21)PPQSSSR	2	LNHS(UniMod:21)PPQSSSR2	206723	125484	203928
P36507	P36507;M0R1B6	MP2K2_HUMAN	MAP2K2	Dual specificity mitogen-activated protein kinase kinase 2	1	LNQPGTPTR	LNQPGT(UniMod:21)PTR	2	LNQPGT(UniMod:21)PTR2	1.16959e+06	1.07535e+06	924082
Q14247	Q14247;H0YEV2;H0YCD9	SRC8_HUMAN	CTTN	Src substrate cortactin	1	LPSSPVYEDAASFK	LPSS(UniMod:21)PVYEDAASFK	2	LPSS(UniMod:21)PVYEDAASFK2	2.78584e+06	2.33859e+06
Q13610	Q13610	PWP1_HUMAN	PWP1	Periodic tryptophan protein 1 homolog	1	LQEEGGGSDEEETGSPSEDGMQSAR	LQEEGGGS(UniMod:21)DEEETGSPSEDGMQSAR	3	LQEEGGGS(UniMod:21)DEEETGSPSEDGMQSAR3	665785	964473	644195
Q9UKV3	Q9UKV3;A0A087WYN3;E7EQT4;S4R3H4	ACINU_HUMAN	ACIN1	Apoptotic chromatin condensation inducer in the nucleus	1	LQPERGSPK	LQPERGS(UniMod:21)PK	2	LQPERGS(UniMod:21)PK2	1.62117e+06	1.25454e+06	1.63983e+06
Q9H6F5	Q9H6F5	CCD86_HUMAN	CCDC86	Coiled-coil domain-containing protein 86	1	LQQGAGLESPQGQPEPGAASPQR	LQQGAGLESPQGQPEPGAAS(UniMod:21)PQR	3	LQQGAGLESPQGQPEPGAAS(UniMod:21)PQR3		353124
P02545	P02545;A0A6Q8PHQ9;Q3BDU5;A0A804HL68;Q5TCI8;A0A6Q8PFJ0	LMNA_HUMAN	LMNA	Prelamin-A/C	1	LRLSPSPTSQR	LRLS(UniMod:21)PS(UniMod:21)PTSQR	2	LRLS(UniMod:21)PS(UniMod:21)PTSQR2	2.06701e+07	1.7198e+07	1.9104e+07
P02545	P02545;A0A6Q8PHQ9;Q3BDU5;A0A804HL68;Q5TCI8;A0A6Q8PFJ0	LMNA_HUMAN	LMNA	Prelamin-A/C	1	LRLSPSPTSQR	LRLS(UniMod:21)PS(UniMod:21)PTSQR	3	LRLS(UniMod:21)PS(UniMod:21)PTSQR3	924800	1.57294e+06	1.05301e+06
P02545	P02545;A0A6Q8PHQ9;Q3BDU5;A0A804HL68;Q5TCI8;A0A6Q8PFJ0	LMNA_HUMAN	LMNA	Prelamin-A/C	1	LRLSPSPTSQR	LRLS(UniMod:21)PSPTSQR	2	LRLS(UniMod:21)PSPTSQR2	7.67251e+06	6.94583e+06	6.3936e+06
P02545	P02545;A0A6Q8PHQ9;Q3BDU5;A0A804HL68;Q5TCI8;A0A6Q8PFJ0	LMNA_HUMAN	LMNA	Prelamin-A/C	1	LSPSPTSQR	LSPS(UniMod:21)PTSQR	2	LSPS(UniMod:21)PTSQR2	1.10696e+07	1.13743e+07	1.13568e+07
Q16643	Q16643;D6RCR4;D6R9W4	DREB_HUMAN	DBN1	Drebrin	1	LSSPVLHR	LSS(UniMod:21)PVLHR	2	LSS(UniMod:21)PVLHR2	1.92709e+06	1.94622e+06	1.84129e+06
Q86UE4	Q86UE4;H0YB56;E5RJU9	LYRIC_HUMAN	MTDH	Protein LYRIC	1	LSSQISAGEEK	LSSQIS(UniMod:21)AGEEK	2	LSSQIS(UniMod:21)AGEEK2	2.2375e+06	2.16089e+06	1.84643e+06
Q13501	Q13501;E7EMC7	SQSTM_HUMAN	SQSTM1	Sequestosome-1	1	LTPVSPESSSTEEK	LTPVS(UniMod:21)PESSSTEEK	2	LTPVS(UniMod:21)PESSSTEEK2	2.11603e+06	2.35654e+06	2.18854e+06
O43583	O43583;F8VVL1	DENR_HUMAN	DENR	Density-regulated protein	1	LTVENSPK	LTVENS(UniMod:21)PK	2	LTVENS(UniMod:21)PK2	343829	405880	410637
O43583	O43583;F8VVL1	DENR_HUMAN	DENR	Density-regulated protein	1	LTVENSPKQEAGISEGQGTAGEEEEK	LTVENSPKQEAGIS(UniMod:21)EGQGTAGEEEEK	3	LTVENSPKQEAGIS(UniMod:21)EGQGTAGEEEEK3	881932
O95391	O95391	SLU7_HUMAN	SLU7	Pre-mRNA-splicing factor SLU7	1	LVEQANSPK	LVEQANS(UniMod:21)PK	2	LVEQANS(UniMod:21)PK2	356042	327100	379025
Q9Y5B6	Q9Y5B6	PAXB1_HUMAN	PAXBP1	PAX3- and PAX7-binding protein 1	1	MADHLEGLSSDDEETSTDITNFNLEK	MADHLEGLS(UniMod:21)SDDEET(UniMod:21)STDITNFNLEK	3	MADHLEGLS(UniMod:21)SDDEET(UniMod:21)STDITNFNLEK3	234558		153072
P55081	P55081	MFAP1_HUMAN	MFAP1	Microfibrillar-associated protein 1	1	MEREDSSEEEEEEIDDEEIER	MEREDS(UniMod:21)S(UniMod:21)EEEEEEIDDEEIER	3	MEREDS(UniMod:21)S(UniMod:21)EEEEEEIDDEEIER3	374506	234494	216465
P07910	P07910;G3V5V7;G3V2D6;G3V4C1;B4DY08;G3V4W0;G3V2Q1	HNRPC_HUMAN	HNRNPC	Heterogeneous nuclear ribonucleoproteins C1/C2	1	MESEGGADDSAEEGDLLDDDDNEDR	MESEGGADDS(UniMod:21)AEEGDLLDDDDNEDR	3	MESEGGADDS(UniMod:21)AEEGDLLDDDDNEDR3	1.38892e+06	2.0423e+06	360888
Q14839	Q14839;A0A2U3TZM0;A0A2R8Y8C1;F5GWX5;A0A2R8YFK9;A0A2R8Y4X2;A0A2R8Y7I0;A0A2R8Y445;A0A2R8Y5M9;A0A2R8YER1;A0A2R8Y425;A0A2R8YE38;A0A2R8Y7M9;A0A2R8YD40;A0A2R8Y5J0;A0A2R8YDW2;A0A2R8YDJ9;A0A0C4DGG9;A0A2R8Y521;A0A2R8Y212;A0A2R8YFD8	CHD4_HUMAN	CHD4	Chromodomain-helicase-DNA-binding protein 4	1	MSQPGSPSPK	MSQPGS(UniMod:21)PSPK	2	MSQPGS(UniMod:21)PSPK2	342777		386148
Q8WWM7	Q8WWM7;H3BUF6	ATX2L_HUMAN	ATXN2L	Ataxin-2-like protein	1	MYPPRSPK	MYPPRS(UniMod:21)PK	2	MYPPRS(UniMod:21)PK2		279689
Q7L1Q6	Q7L1Q6;H0Y503	5MP2_HUMAN	BZW1	eIF5-mimic protein 2	1	NAEEESESEAEEGD	NAEEES(UniMod:21)ES(UniMod:21)EAEEGD	2	NAEEES(UniMod:21)ES(UniMod:21)EAEEGD2	2.93877e+06	1.97313e+06	2.86945e+06
Q6PKG0	Q6PKG0;A0A0B4J210;H0YBM7	LARP1_HUMAN	LARP1	La-related protein 1	1	NALPPVLTTVNGQSPPEHSAPAK	NALPPVLT(UniMod:21)TVNGQSPPEHSAPAK	3	NALPPVLT(UniMod:21)TVNGQSPPEHSAPAK3	671137		549062
A0A0A0MS29;E9PQX8;H7C433	H7C433;A0A0A0MS29;E9PQX8	A0A0A0MS29_HUMAN;E9PQX8_HUMAN;H7C433_HUMAN	MFF	Mitochondrial fission factor	1	NDSLVTPSPQQAR	NDS(UniMod:21)LVTPSPQQAR	2	NDS(UniMod:21)LVTPSPQQAR2	170637
Q14103	Q14103;D6RAF8;D6RD83	HNRPD_HUMAN	HNRNPD	Heterogeneous nuclear ribonucleoprotein D0	1	NEEDEGHSNSSPR	NEEDEGHSNSS(UniMod:21)PR	2	NEEDEGHSNSS(UniMod:21)PR2	6.73081e+06	4.1627e+06	7.60794e+06
Q9NR30	Q9NR30;A0A8I5KND9;A0A8I5KYZ4;A0A8I5KNN2;A0A8I5KNP3	DDX21_HUMAN	DDX21	Nucleolar RNA helicase 2	1	NEEPSEEEIDAPK	NEEPS(UniMod:21)EEEIDAPK	2	NEEPS(UniMod:21)EEEIDAPK2			1.22406e+06
P67809	P67809;C9J5V9;H0Y449	YBOX1_HUMAN	YBX1	Y-box-binding protein 1	1	NEGSESAPEGQAQQR	NEGS(UniMod:21)ES(UniMod:21)APEGQAQQR	2	NEGS(UniMod:21)ES(UniMod:21)APEGQAQQR2	425505	461878	531914
P67809	P67809;C9J5V9;H0Y449	YBOX1_HUMAN	YBX1	Y-box-binding protein 1	1	NEGSESAPEGQAQQR	NEGS(UniMod:21)ESAPEGQAQQR	2	NEGS(UniMod:21)ESAPEGQAQQR2	5.26335e+06	4.5335e+06	6.6791e+06
P11388	P11388	TOP2A_HUMAN	TOP2A	DNA topoisomerase 2-alpha	1	NENTEGSPQEDGVELEGLK	NENTEGS(UniMod:21)PQEDGVELEGLK	3	NENTEGS(UniMod:21)PQEDGVELEGLK3	216772	170280	268546
O00203	O00203	AP3B1_HUMAN	AP3B1	AP-3 complex subunit beta-1	1	NFYESDDDQK	NFYES(UniMod:21)DDDQK	2	NFYES(UniMod:21)DDDQK2	978051	898365	1.02286e+06
Q9BW71	Q9BW71	HIRP3_HUMAN	HIRIP3	HIRA-interacting protein 3	1	NGVAAEVSPAK	NGVAAEVS(UniMod:21)PAK	2	NGVAAEVS(UniMod:21)PAK2	444848	449979	458396
Q9H598	Q9H598	VIAAT_HUMAN	SLC32A1	Vesicular inhibitory amino acid transporter	1	NLKAVSK	NLKAVS(UniMod:21)K	2	NLKAVS(UniMod:21)K2	91409.5	111959	80508.3
P53621	P53621;A0A3B3ITV3;A0A3B3IU78;A0A3B3ISK1;A0A3B3ISC6;A0A3B3IT15;A0A3B3IS84	COPA_HUMAN	COPA	Coatomer subunit alpha	1	NLSPGAVESDVR	NLS(UniMod:21)PGAVESDVR	2	NLS(UniMod:21)PGAVESDVR2	366290
Q9H0D6	Q9H0D6	XRN2_HUMAN	XRN2	5'-3' exoribonuclease 2	1	NSPGSQVASNPR	NS(UniMod:21)PGSQVASNPR	2	NS(UniMod:21)PGSQVASNPR2	361836	325225	418190
Q6ZMW2	Q6ZMW2;C9J9Y8	ZN782_HUMAN	ZNF782	Zinc finger protein 782	1	NSPEDSQPDEISEKSPENQGK	NSPEDSQPDEISEKS(UniMod:21)PENQGK	3	NSPEDSQPDEISEKS(UniMod:21)PENQGK3		486005	625702
Q9H1E3	Q9H1E3	NUCKS_HUMAN	NUCKS1	Nuclear ubiquitous casein and cyclin-dependent kinase substrate 1	1	NSQEDSEDSEDK	NSQEDS(UniMod:21)EDSEDK	2	NSQEDS(UniMod:21)EDSEDK2	258637	211764
Q9NYV4	Q9NYV4;J3QSD7	CDK12_HUMAN	CDK12	Cyclin-dependent kinase 12	1	NSSPAPPQPAPGK	NSS(UniMod:21)PAPPQPAPGK	2	NSS(UniMod:21)PAPPQPAPGK2	748892	786281	839387
Q13427	Q13427;A0A7I2V629;E9PG73;C9JM79;A0A7I2V4F2;A0A7I2V5Q5	PPIG_HUMAN	PPIG	Peptidyl-prolyl cis-trans isomerase G	1	NVSESPNRK	NVSES(UniMod:21)PNRK	2	NVSES(UniMod:21)PNRK2		136540
P67809	P67809;C9J5V9;H0Y449	YBOX1_HUMAN	YBX1	Y-box-binding protein 1	1	NYQQNYQNSESGEK	NYQQNYQNS(UniMod:21)ESGEK	2	NYQQNYQNS(UniMod:21)ESGEK2	3.49524e+06	3.91398e+06	3.91618e+06
A0A6Q8PGN6	A0A6Q8PGN6;F8W7E0;E9PSG1	A0A6Q8PGN6_HUMAN	CAST	Calpastatin	1	PAASPRPR	PAAS(UniMod:21)PRPR	2	PAAS(UniMod:21)PRPR2	1.53889e+06	1.86491e+06	1.27775e+06
P54727	P54727;H0Y579	RD23B_HUMAN	RAD23B	UV excision repair protein RAD23 homolog B	1	PAEKPAETPVATSPTATDSTSGDSSR	PAEKPAETPVATS(UniMod:21)PTATDSTSGDSSR	3	PAEKPAETPVATS(UniMod:21)PTATDSTSGDSSR3	301219
P53396	P53396	ACLY_HUMAN	ACLY	ATP-citrate synthase	1	PAMPQDSVPSPR	PAMPQDSVPS(UniMod:21)PR	2	PAMPQDSVPS(UniMod:21)PR2	576932	792746	601824
Q96JM3	Q96JM3	CHAP1_HUMAN	CHAMP1	Chromosome alignment-maintaining phosphoprotein 1	1	PAPVSPESVK	PAPVS(UniMod:21)PESVK	2	PAPVS(UniMod:21)PESVK2		242452	377796
P29692	P29692;E9PI39;E9PRY8;E9PK01;E9PQZ1;A0A087X1X7;E9PQ49;E9PL71	EF1D_HUMAN	EEF1D	Elongation factor 1-delta	1	PATPAEDDEDDDIDLFGSDNEEEDK	PATPAEDDEDDDIDLFGS(UniMod:21)DNEEEDK	3	PATPAEDDEDDDIDLFGS(UniMod:21)DNEEEDK3	982532	894750	886064
O15173	O15173;U3KQM0;U3KPU8	PGRC2_HUMAN	PGRMC2	Membrane-associated progesterone receptor component 2	1	PGEEPSEYTDEEDTK	PGEEPSEYT(UniMod:21)DEEDTK	2	PGEEPSEYT(UniMod:21)DEEDTK2	1.68537e+06	2.49132e+06	3.93e+06
P08238	P08238;Q58FF8	HS90B_HUMAN	HSP90AB1	Heat shock protein HSP 90-beta	0	PKIEDVGSDEEDDSGK	PKIEDVGS(UniMod:21)DEEDDSGK	3	PKIEDVGS(UniMod:21)DEEDDSGK3		38866.3	43321.3
Q86VM9	Q86VM9;E7ERS3	ZCH18_HUMAN	ZC3H18	Zinc finger CCCH domain-containing protein 18	1	PRSPQPPSR	PRS(UniMod:21)PQPPSR	2	PRS(UniMod:21)PQPPSR2	1.10114e+06	772888	1.08733e+06
Q15366	Q15366;H3BSS4	PCBP2_HUMAN	PCBP2	Poly(rC)-binding protein 2	1	PSSSPVIFAGGQDR	PSSS(UniMod:21)PVIFAGGQDR	2	PSSS(UniMod:21)PVIFAGGQDR2	1.2141e+06	865365	913519
Q9H0G5	Q9H0G5	NSRP1_HUMAN	NSRP1	Nuclear speckle splicing regulatory protein 1	1	PSVFGNDSDDDDETSVSESLQR	PSVFGNDS(UniMod:21)DDDDETSVSESLQR	3	PSVFGNDS(UniMod:21)DDDDETSVSESLQR3	491653
Q9H0G5	Q9H0G5	NSRP1_HUMAN	NSRP1	Nuclear speckle splicing regulatory protein 1	1	PSVFGNDSDDDDETSVSESLQR	PSVFGNDSDDDDET(UniMod:21)SVSESLQR	3	PSVFGNDSDDDDET(UniMod:21)SVSESLQR3		416312	490504
Q9UKL0	Q9UKL0	RCOR1_HUMAN	RCOR1	REST corepressor 1	1	PVKSPDNSIK	PVKS(UniMod:21)PDNSIK	2	PVKS(UniMod:21)PDNSIK2	378642	174501
Q9UK76	Q9UK76	JUPI1_HUMAN	JPT1	Jupiter microtubule associated homolog 1	1	PVPAAPVPSPVAPAPVPSR	PVPAAPVPS(UniMod:21)PVAPAPVPSR	3	PVPAAPVPS(UniMod:21)PVAPAPVPSR3	346188	266213	429952
Q8NC44	Q8NC44;H7C3D5	RETR2_HUMAN	RETREG2	Reticulophagy regulator 2	1	QALDSEEEEEDVAAK	QALDS(UniMod:21)EEEEEDVAAK	2	QALDS(UniMod:21)EEEEEDVAAK2	368699	394109	327268
P46937	P46937	YAP1_HUMAN	YAP1	Transcriptional coactivator YAP1	1	QASTDAGTAGALTPQHVR	QAST(UniMod:21)DAGTAGALTPQHVR	3	QAST(UniMod:21)DAGTAGALTPQHVR3	339581	763100	624076
Q8N684	Q8N684;J3QT54;C9JM38;F5GXA3;F5H047;C9J323;F5H6A8;F5H669;C9J286;F5H6M0;F5H1W4;F5H6P5;F5H5B7;F5H2K8	CPSF7_HUMAN	CPSF7	Cleavage and polyadenylation specificity factor subunit 7	1	QEPSPKPNNK	QEPS(UniMod:21)PKPNNK	2	QEPS(UniMod:21)PKPNNK2		147023
Q8TAD8	Q8TAD8	SNIP1_HUMAN	SNIP1	Smad nuclear-interacting protein 1	1	QERLSPEVAPPAHR	QERLS(UniMod:21)PEVAPPAHR	3	QERLS(UniMod:21)PEVAPPAHR3	417465	354264
Q04695	Q04695	K1C17_HUMAN	KRT17	Keratin, type I cytoskeletal 17	1	QFTSSSSIK	QFTSSSS(UniMod:21)IK	2	QFTSSSS(UniMod:21)IK2	4.06451e+06	3.39337e+06	3.29127e+06
P46821	P46821	MAP1B_HUMAN	MAP1B	Microtubule-associated protein 1B	1	QGSPDQVSPVSEMTSTSLYQDK	QGS(UniMod:21)PDQVS(UniMod:21)PVSEMTSTSLYQDK	3	QGS(UniMod:21)PDQVS(UniMod:21)PVSEMTSTSLYQDK3	146148	201765
Q9NZI8	Q9NZI8	IF2B1_HUMAN	IGF2BP1	Insulin-like growth factor 2 mRNA-binding protein 1	1	QGSPVAAGAPAK	QGS(UniMod:21)PVAAGAPAK	2	QGS(UniMod:21)PVAAGAPAK2	1.13241e+06	1.04502e+06	1.32741e+06
O15027	O15027;A0A3F2YNZ0;F1T0I1;A0A3F2YNX0;A0A8I5KPG1	SC16A_HUMAN	SEC16A	Protein transport protein Sec16A	1	QIDSSPVGGETDETTVSQNYR	QIDS(UniMod:21)SPVGGETDETTVSQNYR	3	QIDS(UniMod:21)SPVGGETDETTVSQNYR3	335663		297694
O15027	O15027;A0A3F2YNZ0;F1T0I1;A0A3F2YNX0;A0A8I5KPG1	SC16A_HUMAN	SEC16A	Protein transport protein Sec16A	1	QIDSSPVGGETDETTVSQNYR	QIDSSPVGGETDET(UniMod:21)TVSQNYR	3	QIDSSPVGGETDET(UniMod:21)TVSQNYR3		264368
B5ME19;Q99613	Q99613;B5ME19;H3BPE3	EIF3C_HUMAN;EIFCL_HUMAN	EIF3C;EIF3CL	Eukaryotic translation initiation factor 3 subunit C-like protein	0	QNPEQSADEDAEK	QNPEQS(UniMod:21)ADEDAEK	2	QNPEQS(UniMod:21)ADEDAEK2	1.13127e+06	1.74364e+06	3.66617e+06
Q9NQC3	Q9NQC3	RTN4_HUMAN	RTN4	Reticulon-4	1	QPSWDPSPVSSTVPAPSPLSAAAVSPSK	QPS(UniMod:21)WDPSPVSSTVPAPSPLSAAAVSPSK	3	QPS(UniMod:21)WDPSPVSSTVPAPSPLSAAAVSPSK3	457989	1.31524e+06
Q96AE4	Q96AE4	FUBP1_HUMAN	FUBP1	Far upstream element-binding protein 1	1	QQAAYYAQTSPQGMPQHPPAPQGQ	QQAAYYAQTS(UniMod:21)PQGMPQHPPAPQGQ	3	QQAAYYAQTS(UniMod:21)PQGMPQHPPAPQGQ3	655336	595625	572182
Q5STZ8	Q8NE71;Q5STZ8;A0A0G2JJB9;A0A0G2JIC2	Q5STZ8_HUMAN	ABCF1	ATP-binding cassette sub-family F member 1	1	QQPPEPEWIGDGESTSPSDK	QQPPEPEWIGDGES(UniMod:21)TSPSDK	3	QQPPEPEWIGDGES(UniMod:21)TSPSDK3
Q5STZ8	Q8NE71;Q5STZ8;A0A0G2JJB9;A0A0G2JIC2	Q5STZ8_HUMAN	ABCF1	ATP-binding cassette sub-family F member 1	1	QQPPEPEWIGDGESTSPSDK	QQPPEPEWIGDGESTS(UniMod:21)PSDK	3	QQPPEPEWIGDGESTS(UniMod:21)PSDK3	379063
Q9UHB6	Q9UHB6;F8VS07;F8VQE1	LIMA1_HUMAN	LIMA1	LIM domain and actin-binding protein 1	1	QQSPQEPK	QQS(UniMod:21)PQEPK	2	QQS(UniMod:21)PQEPK2	1.6981e+06	1.72351e+06	1.88229e+06
O60841	O60841;A0A087WUT6	IF2P_HUMAN	EIF5B	Eukaryotic translation initiation factor 5B	1	QSFDDNDSEELEDK	QSFDDNDS(UniMod:21)EELEDK	2	QSFDDNDS(UniMod:21)EELEDK2	1.39322e+06	1.44379e+06	1.7134e+06
O75475	O75475	PSIP1_HUMAN	PSIP1	PC4 and SFRS1-interacting protein	1	QSNASSDVEVEEK	QSNASS(UniMod:21)DVEVEEK	2	QSNASS(UniMod:21)DVEVEEK2	4.89334e+06	5.19259e+06	5.15589e+06
Q9Y2D5	Q9Y2D5	AKAP2_HUMAN	AKAP2	A-kinase anchor protein 2	1	QVLQSTQSPR	QVLQSTQS(UniMod:21)PR	2	QVLQSTQS(UniMod:21)PR2	353112	299626	287308
P51858	P51858	HDGF_HUMAN	HDGF	Hepatoma-derived growth factor	1	RAGDLLEDSPK	RAGDLLEDS(UniMod:21)PK	2	RAGDLLEDS(UniMod:21)PK2	1.74259e+06	1.98205e+06
Q8IYB3	Q8IYB3;M0R088;A9Z1X7	SRRM1_HUMAN	SRRM1	Serine/arginine repetitive matrix protein 1	1	RESPSPAPK	RES(UniMod:21)PS(UniMod:21)PAPK	2	RES(UniMod:21)PS(UniMod:21)PAPK2	748818	716123	899288
Q92688	Q92688	AN32B_HUMAN	ANP32B	Acidic leucine-rich nuclear phosphoprotein 32 family member B	1	RETDDEGEDD	RET(UniMod:21)DDEGEDD	2	RET(UniMod:21)DDEGEDD2	189816	337732	516670
P49736	P49736;C9J013;F8WDM3;C9JZ21	MCM2_HUMAN	MCM2	DNA replication licensing factor MCM2	1	RGNDPLTSSPGR	RGNDPLT(UniMod:21)SSPGR	2	RGNDPLT(UniMod:21)SSPGR2	1.17785e+06	1.12206e+06	1.2867e+06
O43847	O43847	NRDC_HUMAN	NRDC	Nardilysin	1	RGSLSNAGDPEIVK	RGS(UniMod:21)LSNAGDPEIVK	2	RGS(UniMod:21)LSNAGDPEIVK2	692080	620822	440948
Q6NZI2	Q6NZI2	CAVN1_HUMAN	CAVIN1	Caveolae-associated protein 1	1	RGSSPDVHALLEITEESDAVLVDK	RGS(UniMod:21)S(UniMod:21)PDVHALLEITEESDAVLVDK	3	RGS(UniMod:21)S(UniMod:21)PDVHALLEITEESDAVLVDK3	1.07543e+06	817566	663439
Q8IYB3	Q8IYB3;M0R088;A9Z1X7	SRRM1_HUMAN	SRRM1	Serine/arginine repetitive matrix protein 1	1	RLSPSASPPR	RLS(UniMod:21)PS(UniMod:21)AS(UniMod:21)PPR	2	RLS(UniMod:21)PS(UniMod:21)AS(UniMod:21)PPR2	3.65253e+06
Q9UK76	Q9UK76;J3KSH8;J3KT51	JUPI1_HUMAN	JPT1	Jupiter microtubule associated homolog 1	1	RNSSEASSGDFLDLK	RNSS(UniMod:21)EASSGDFLDLK	3	RNSS(UniMod:21)EASSGDFLDLK3	2.27261e+06	1.92148e+06	1.79168e+06
P55081	P55081	MFAP1_HUMAN	MFAP1	Microfibrillar-associated protein 1	1	RPDYAPMESSDEEDEEFQFIK	RPDYAPMES(UniMod:21)S(UniMod:21)DEEDEEFQFIK	3	RPDYAPMES(UniMod:21)S(UniMod:21)DEEDEEFQFIK3	1.14905e+06	860954	860706
Q12996	Q12996;H0YE74;E9PLP8	CSTF3_HUMAN	CSTF3	Cleavage stimulation factor subunit 3	1	RPNEDSDEDEEK	RPNEDS(UniMod:21)DEDEEK	2	RPNEDS(UniMod:21)DEDEEK2	880678	633952	896308
Q01082	Q01082;A0A087WUZ3	SPTB2_HUMAN	SPTBN1	Spectrin beta chain, non-erythrocytic 1	1	RPPSPEPSTK	RPPS(UniMod:21)PEPSTK	2	RPPS(UniMod:21)PEPSTK2	1.07114e+06	717201	388301
Q01105	Q01105;A0A8I5KS71;A0A8I5KTZ2	SET_HUMAN	SET	Protein SET	1	RQSPLPPQK	RQS(UniMod:21)PLPPQK	2	RQS(UniMod:21)PLPPQK2	3.7727e+06	2.90283e+06	3.52364e+06
O00193	O00193;E9PM92;E9PQA1	SMAP_HUMAN	SMAP	Small acidic protein	0	RSASPDDDLGSSNWEAADLGNEER	RS(UniMod:21)ASPDDDLGSSNWEAADLGNEER	3	RS(UniMod:21)ASPDDDLGSSNWEAADLGNEER3	280610	264034	265937
Q05193	Q05193;A0A0D9SFB1;A0A0D9SFE4;A0A0U1RQP1	DYN1_HUMAN	DNM1	Dynamin-1	1	RSPTSSPTPQR	RS(UniMod:21)PTSS(UniMod:21)PTPQR	2	RS(UniMod:21)PTSS(UniMod:21)PTPQR2	972823	649251	741117
P25205	P25205;J3KQ69;Q7Z6P5;A0A499FHX9	MCM3_HUMAN	MCM3	DNA replication licensing factor MCM3	1	RSEDESETEDEEEK	RSEDES(UniMod:21)ET(UniMod:21)EDEEEK	2	RSEDES(UniMod:21)ET(UniMod:21)EDEEEK2	983084	584283	1.20382e+06
Q8N556	Q8N556	AFAP1_HUMAN	AFAP1	Actin filament-associated protein 1	1	RTGSNAAQYK	RT(UniMod:21)GSNAAQYK	2	RT(UniMod:21)GSNAAQYK2	336923	262396	456487
Q9UQ35	Q9UQ35	SRRM2_HUMAN	SRRM2	Serine/arginine repetitive matrix protein 2	1	RVPSPTPAPK	RVPS(UniMod:21)PTPAPK	2	RVPS(UniMod:21)PTPAPK2	2.07019e+06	1.82154e+06	2.40723e+06
Q8IYB3	Q8IYB3;M0R088;A9Z1X7	SRRM1_HUMAN	SRRM1	Serine/arginine repetitive matrix protein 1	1	RYSPSPPPK	RYS(UniMod:21)PS(UniMod:21)PPPK	2	RYS(UniMod:21)PS(UniMod:21)PPPK2	3.06816e+06	2.71652e+06	3.3254e+06
P27824	P27824;A0A7P0TAE9;A0A7P0TB65;D6RGY2;A0A7P0T937;A0A7P0T840;A0A7P0Z484	CALX_HUMAN	CANX	Calnexin	1	SDAEEDGGTVSQEEEDR	S(UniMod:21)DAEEDGGTVSQEEEDR	2	S(UniMod:21)DAEEDGGTVSQEEEDR2		474234
P10412	P10412	H14_HUMAN	H1-4	Histone H1.4	1	SETAPAAPAAPAPAEK	S(UniMod:21)ET(UniMod:21)APAAPAAPAPAEK	2	S(UniMod:21)ET(UniMod:21)APAAPAAPAPAEK2	850035	720046	706941
P16401	P16401	H15_HUMAN	H1-5	Histone H1.5	1	SETAPAETATPAPVEKSPAK	S(UniMod:21)ETAPAETATPAPVEKS(UniMod:21)PAK	3	S(UniMod:21)ETAPAETATPAPVEKS(UniMod:21)PAK3	497215	210990
Q13263	Q13263;M0R0K9	TIF1B_HUMAN	TRIM28	Transcription intermediary factor 1-beta	1	SGEGEVSGLMR	S(UniMod:21)GEGEVSGLMR	2	S(UniMod:21)GEGEVSGLMR2	1.01757e+06	955197	991666
Q7Z2E3	Q7Z2E3;C9J8U3;A0A0A0MRW7;A0A5F9ZI51;A0A5F9ZGW5	APTX_HUMAN	APTX	Aprataxin	1	SGNSDSIER	S(UniMod:21)GNSDSIER	2	S(UniMod:21)GNSDSIER2	181345		218585
Q13185	Q13185;S4R2Y4	CBX3_HUMAN	CBX3	Chromobox protein homolog 3	1	SLSDSESDDSK	S(UniMod:21)LS(UniMod:21)DSESDDSK	2	S(UniMod:21)LS(UniMod:21)DSESDDSK2	445702	526912	832092
Q9NWH9	Q9NWH9;H7C3F4	SLTM_HUMAN	SLTM	SAFB-like transcription modulator	1	SPGHMVILDQTK	S(UniMod:21)PGHMVILDQTK	2	S(UniMod:21)PGHMVILDQTK2
P46821	P46821	MAP1B_HUMAN	MAP1B	Microtubule-associated protein 1B	1	SPSDSGYSYETIGK	S(UniMod:21)PSDSGYSYETIGK	2	S(UniMod:21)PSDSGYSYETIGK2	761843	679085	552481
Q9NVD7	Q9NVD7	PARVA_HUMAN	PARVA	Alpha-parvin	1	SPTPKSPPSR	S(UniMod:21)PTPKS(UniMod:21)PPSR	2	S(UniMod:21)PTPKS(UniMod:21)PPSR2	984638	656134	501100
A0A0U1RRM6	A0A0U1RRM6	A0A0U1RRM6_HUMAN	ENAH	Protein enabled homolog	1	SPVISRPK	S(UniMod:21)PVISRPK	2	S(UniMod:21)PVISRPK2	545212	984437	1.09617e+06
Q9C0C2	Q9C0C2;A0A2R8Y5C4	TB182_HUMAN	TNKS1BP1	182 kDa tankyrase-1-binding protein	1	SQEADVQDWEFR	S(UniMod:21)QEADVQDWEFR	2	S(UniMod:21)QEADVQDWEFR2	305679
Q8IYB3	Q8IYB3;M0R088;A9Z1X7	SRRM1_HUMAN	SRRM1	Serine/arginine repetitive matrix protein 1	1	SRSPSPAPEK	S(UniMod:21)RS(UniMod:21)PS(UniMod:21)PAPEK	2	S(UniMod:21)RS(UniMod:21)PS(UniMod:21)PAPEK2	1.40665e+06	1.04308e+06	1.39454e+06
O95429	O95429;H0YBT1	BAG4_HUMAN	BAG4	BAG family molecular chaperone regulator 4	1	SSGNSPTPVSR	S(UniMod:21)SGNSPTPVSR	2	S(UniMod:21)SGNSPTPVSR2	113361
P51991	P51991;A0A7I2V4G0;A0A7I2V402;A0A7I2V5D8;H7C1J8;A0A7I2V2R3	ROA3_HUMAN	HNRNPA3	Heterogeneous nuclear ribonucleoprotein A3	1	SSGSPYGGGYGSGGGSGGYGSR	S(UniMod:21)SGSPYGGGYGSGGGSGGYGSR	2	S(UniMod:21)SGSPYGGGYGSGGGSGGYGSR2	415527	359251	307392
Q9UQ35	Q9UQ35	SRRM2_HUMAN	SRRM2	Serine/arginine repetitive matrix protein 2	1	SSSPVTELASR	S(UniMod:21)SS(UniMod:21)PVTELASR	2	S(UniMod:21)SS(UniMod:21)PVTELASR2	307936		222887
Q4G0J3	Q4G0J3;A0A8I5KQG7;A0A8I5KSZ3;A0A8I5KUI4;H0YA82;A0A8I5KYN2	LARP7_HUMAN	LARP7	La-related protein 7	1	SSSEDAESLAPR	S(UniMod:21)SSEDAESLAPR	2	S(UniMod:21)SSEDAESLAPR2	458437	394495	536491
Q9UQ35	Q9UQ35;I3L4D8;I3L182	SRRM2_HUMAN	SRRM2	Serine/arginine repetitive matrix protein 2	1	SVSPCSNVESR	S(UniMod:21)VS(UniMod:21)PC(UniMod:4)SNVESR	2	S(UniMod:21)VS(UniMod:21)PC(UniMod:4)SNVESR2	383699	219749	280111
Q9Y2W1	Q9Y2W1;A0A3B3ITZ9	TR150_HUMAN	THRAP3	Thyroid hormone receptor-associated protein 3	1	SYSPAHNR	S(UniMod:21)YS(UniMod:21)PAHNR	2	S(UniMod:21)YS(UniMod:21)PAHNR2		110789
P38159	P38159;H0Y6E7;H3BT71;H3BUY5	RBMX_HUMAN	RBMX	RNA-binding motif protein, X chromosome	1	SAPSGPVRSSSGMGGR	SAPSGPVRSSS(UniMod:21)GMGGR	2	SAPSGPVRSSS(UniMod:21)GMGGR2		358473
O00193	O00193;E9PM92;E9PQA1	SMAP_HUMAN	SMAP	Small acidic protein	0	SASPDDDLGSSNWEAADLGNEERK	SAS(UniMod:21)PDDDLGSSNWEAADLGNEERK	3	SAS(UniMod:21)PDDDLGSSNWEAADLGNEERK3	1.08737e+06	785908	427605
Q9UQ35	Q9UQ35;I3L4D8;I3L182;I3L1I8	SRRM2_HUMAN	SRRM2	Serine/arginine repetitive matrix protein 2	1	SATRPSPSPER	SATRPS(UniMod:21)PS(UniMod:21)PER	2	SATRPS(UniMod:21)PS(UniMod:21)PER2	2.55029e+06	1.94692e+06	2.22906e+06
Q15149	Q15149;A0A8I5KYZ1;A0A8I5KSD5;E9PMV1;A0A8I5KUE3;H0YDN1	PLEC_HUMAN	PLEC	Plectin	1	SDEGQLSPATR	SDEGQLS(UniMod:21)PATR	2	SDEGQLS(UniMod:21)PATR2	496248	507250
Q01831	Q01831	XPC_HUMAN	XPC	DNA repair protein complementing XP-C cells	1	SEAAAPHTDAGGGLSSDEEEGTSSQAEAAR	SEAAAPHTDAGGGLS(UniMod:21)S(UniMod:21)DEEEGTSSQAEAAR	3	SEAAAPHTDAGGGLS(UniMod:21)S(UniMod:21)DEEEGTSSQAEAAR3	1.08236e+06	790045	981915
P07910	P07910;G3V5V7;G3V2D6;G3V4C1;B4DY08;G3V4W0;G3V2Q1	HNRPC_HUMAN	HNRNPC	Heterogeneous nuclear ribonucleoproteins C1/C2	1	SEEEQSSSSVKK	SEEEQSSS(UniMod:21)SVKK	2	SEEEQSSS(UniMod:21)SVKK2			358132
Q86UE4	Q86UE4;E5RJU9	LYRIC_HUMAN	MTDH	Protein LYRIC	1	SETSWESPK	SETSWES(UniMod:21)PK	2	SETSWES(UniMod:21)PK2	296441
Q69YN4	Q69YN4;H0YC41	VIR_HUMAN	VIRMA	Protein virilizer homolog	1	SFLSEPSSPGR	SFLSEPSS(UniMod:21)PGR	2	SFLSEPSS(UniMod:21)PGR2	237135	309233
P18615	P18615;A0A0G2JI50;A0A0A0MSN9;E9PD43;A0A0A0MT02	NELFE_HUMAN	NELFE	Negative elongation factor E	1	SGAHSSASPPR	SGAHSSAS(UniMod:21)PPR	2	SGAHSSAS(UniMod:21)PPR2		131278
P02545	P02545;A0A6Q8PHQ9;Q3BDU5;A0A6Q8PFM1;A0A804HL68;A0A6Q8PFJ0;A0A6Q8PF80;A0A6Q8PF59;A0A6Q8PGH0;A0A6Q8PFF5	LMNA_HUMAN	LMNA	Prelamin-A/C	1	SGAQASSTPLSPTR	SGAQASSTPLS(UniMod:21)PTR	2	SGAQASSTPLS(UniMod:21)PTR2	4.85095e+06	5.76042e+06	5.06767e+06
Q9Y618	Q9Y618;C9J7T7;C9J0Q5;A0A384DVL6;C9JE98	NCOR2_HUMAN	NCOR2	Nuclear receptor corepressor 2	1	SGLEPASSPSK	SGLEPAS(UniMod:21)SPSK	2	SGLEPAS(UniMod:21)SPSK2			147477
Q53EL6	Q53EL6;Q5VZS7	PDCD4_HUMAN	PDCD4	Programmed cell death protein 4	1	SGLTVPTSPK	SGLTVPTS(UniMod:21)PK	2	SGLTVPTS(UniMod:21)PK2	2.00156e+06	1.81533e+06	1.77455e+06
Q07666	Q07666	KHDR1_HUMAN	KHDRBS1	KH domain-containing, RNA-binding, signal transduction-associated protein 1	1	SGSMDPSGAHPSVR	SGS(UniMod:21)MDPSGAHPSVR	2	SGS(UniMod:21)MDPSGAHPSVR2	907906	1.35132e+06	696661
Q8N556	Q8N556	AFAP1_HUMAN	AFAP1	Actin filament-associated protein 1	1	SGTSSPQSPVFR	SGTSSPQS(UniMod:21)PVFR	2	SGTSSPQS(UniMod:21)PVFR2	654453	694470	727240
P06748	P06748;E5RI98;A0A7I2YQC0;A0A7I2V5S2	NPM_HUMAN	NPM1	Nucleophosmin	1	SIRDTPAK	SIRDT(UniMod:21)PAK	2	SIRDT(UniMod:21)PAK2	3.06553e+06	1.6868e+06	1.70059e+06
P18615	P18615;A2ABK4;A0A0G2JI50;A0A0A0MSN9;E9PD43;A0A0A0MT02	NELFE_HUMAN	NELFE	Negative elongation factor E	1	SISADDDLQESSR	SIS(UniMod:21)ADDDLQESSR	2	SIS(UniMod:21)ADDDLQESSR2	1.54652e+06	1.40025e+06	1.41595e+06
P46821	P46821	MAP1B_HUMAN	MAP1B	Microtubule-associated protein 1B	1	SKPLAASPK	SKPLAAS(UniMod:21)PK	2	SKPLAAS(UniMod:21)PK2	239977		117501
Q13185	Q13185;S4R2Y4	CBX3_HUMAN	CBX3	Chromobox protein homolog 3	1	SLSDSESDDSK	SLS(UniMod:21)DSESDDSK	2	SLS(UniMod:21)DSESDDSK2	3.20651e+06	2.88583e+06	3.64691e+06
Q96T37	Q96T37;A0A494C001;A0A087WWP4;A0A499FJY3	RBM15_HUMAN	RBM15	RNA-binding protein 15	1	SLSPGGAALGYR	SLS(UniMod:21)PGGAALGYR	2	SLS(UniMod:21)PGGAALGYR2	635958	442501	568147
P08670	P08670;A0A1B0GTT5;A0A1B0GVG8;B0YJC4	VIME_HUMAN	VIM	Vimentin	1	SLYASSPGGVYATR	SLYASS(UniMod:21)PGGVYATR	2	SLYASS(UniMod:21)PGGVYATR2	1.19978e+06	953737	819241
Q09666	Q09666	AHNK_HUMAN	AHNAK	Neuroblast differentiation-associated protein AHNAK	1	SNSFSDER	SNS(UniMod:21)FSDER	2	SNS(UniMod:21)FSDER2	444086	452535	423947
Q9UPN4	Q9UPN4;I3L2J8	CP131_HUMAN	CEP131	Centrosomal protein of 131 kDa	1	SNSTTQVSQPR	SNS(UniMod:21)TTQVSQPR	2	SNS(UniMod:21)TTQVSQPR2	266261	195720	240960
Q9Y3T9	Q9Y3T9	NOC2L_HUMAN	NOC2L	Nucleolar complex protein 2 homolog	1	SPDKPGGSPSASR	SPDKPGGS(UniMod:21)PSASR	2	SPDKPGGS(UniMod:21)PSASR2	262827	159548	246274
P08651	P08651;A0A286YEX4	NFIC_HUMAN	NFIC	Nuclear factor 1 C-type	1	SPFNSPSPQDSPR	SPFNSPS(UniMod:21)PQDSPR	2	SPFNSPS(UniMod:21)PQDSPR2	582293	588889	520336
Q68EM7	Q68EM7;I3L460	RHG17_HUMAN	ARHGAP17	Rho GTPase-activating protein 17	1	SPSPPTQHTGQPPGQPSAPSQLSAPR	SPS(UniMod:21)PPTQHTGQPPGQPSAPSQLSAPR	3	SPS(UniMod:21)PPTQHTGQPPGQPSAPSQLSAPR3	2.48073e+06	2.30129e+06	2.40589e+06
P46821	P46821	MAP1B_HUMAN	MAP1B	Microtubule-associated protein 1B	1	SPSLSPSPPSPLEK	SPSLSPSPPS(UniMod:21)PLEK	2	SPSLSPSPPS(UniMod:21)PLEK2	723122	574220
Q9NVD7	Q9NVD7	PARVA_HUMAN	PARVA	Alpha-parvin	1	SPTPKSPPSR	SPTPKS(UniMod:21)PPSR	2	SPTPKS(UniMod:21)PPSR2	256045
Q03701	Q03701	CEBPZ_HUMAN	CEBPZ	CCAAT/enhancer-binding protein zeta	1	SQLDDHPESDDEENFIDANDDEDMEK	SQLDDHPES(UniMod:21)DDEENFIDANDDEDMEK	3	SQLDDHPES(UniMod:21)DDEENFIDANDDEDMEK3	455666	515016	315091
P23588	P23588;E7EX17	IF4B_HUMAN	EIF4B	Eukaryotic translation initiation factor 4B	1	SQSSDTEQQSPTSGGGK	SQS(UniMod:21)SDTEQQSPTSGGGK	2	SQS(UniMod:21)SDTEQQSPTSGGGK2	626841	655521	720570
P23588	P23588;E7EX17	IF4B_HUMAN	EIF4B	Eukaryotic translation initiation factor 4B	1	SQSSDTEQQSPTSGGGK	SQSSDTEQQS(UniMod:21)PTSGGGK	2	SQSSDTEQQS(UniMod:21)PTSGGGK2	680962	613698	679991
Q14676	Q14676	MDC1_HUMAN	MDC1	Mediator of DNA damage checkpoint protein 1	1	SQTTTERDSDTDVEEEELPVENR	SQT(UniMod:21)T(UniMod:21)TERDSDTDVEEEELPVENR	3	SQT(UniMod:21)T(UniMod:21)TERDSDTDVEEEELPVENR3	885699	511503	681704
Q9Y618	Q9Y618;C9J7T7;C9J0Q5;A0A384DVL6;C9JQE8;C9JE98	NCOR2_HUMAN	NCOR2	Nuclear receptor corepressor 2	1	SRSPAPPADK	SRS(UniMod:21)PAPPADK	2	SRS(UniMod:21)PAPPADK2	107132
Q9UQ35	Q9UQ35;I3L3Q8	SRRM2_HUMAN	SRRM2	Serine/arginine repetitive matrix protein 2	1	SRTPPSAPSQSR	SRT(UniMod:21)PPSAPSQSR	2	SRT(UniMod:21)PPSAPSQSR2	318829	231367	330612
P29590	P29590;H3BT57;H3BUJ5;H3BVD2;H3BRN3	PML_HUMAN	PML	Protein PML	1	SSPEQPRPSTSK	SS(UniMod:21)PEQPRPSTSK	2	SS(UniMod:21)PEQPRPSTSK2	410703	311377	389481
Q8IZ21	Q8IZ21;A0A0J9YVR0	PHAR4_HUMAN	PHACTR4	Phosphatase and actin regulator 4	1	SSSPVQVEEEPVR	SSS(UniMod:21)PVQVEEEPVR	2	SSS(UniMod:21)PVQVEEEPVR2	442997	446316	304267
Q9UQ35	Q9UQ35;I3L4D8;I3L182	SRRM2_HUMAN	SRRM2	Serine/arginine repetitive matrix protein 2	1	SSTPPRQSPSR	SST(UniMod:21)PPRQS(UniMod:21)PSR	2	SST(UniMod:21)PPRQS(UniMod:21)PSR2	530879		616316
P35606	P35606;H0YAC7;A0A7I2V258;H0Y938	COPB2_HUMAN	COPB2	Coatomer subunit beta'	1	STAQQELDGKPASPTPVIVASHTANK	STAQQELDGKPAS(UniMod:21)PTPVIVASHTANK	3	STAQQELDGKPAS(UniMod:21)PTPVIVASHTANK3	1.74743e+06	1.41704e+06	1.56295e+06
Q14157	Q14157;F8W726	UBP2L_HUMAN	UBAP2L	Ubiquitin-associated protein 2-like	1	STSAPQMSPGSSDNQSSSPQPAQQK	STSAPQMS(UniMod:21)PGSSDNQSSSPQPAQQK	3	STSAPQMS(UniMod:21)PGSSDNQSSSPQPAQQK3	931436	1.30439e+06	694987
Q8WWM7	Q8WWM7;H3BUF6;H3BRB0;A0A0C4DGL7	ATX2L_HUMAN	ATXN2L	Ataxin-2-like protein	1	STSTPTSPGPR	STSTPTS(UniMod:21)PGPR	2	STSTPTS(UniMod:21)PGPR2	514790	321160	309034
A0A7I2V647	A0A7I2V647	A0A7I2V647_HUMAN	G3BP2	Ras GTPase-activating protein-binding protein 2	1	STTPPPAEPVSLPQEPPKPR	STT(UniMod:21)PPPAEPVSLPQEPPKPR	3	STT(UniMod:21)PPPAEPVSLPQEPPKPR3	529562
Q96IZ0	Q96IZ0	PAWR_HUMAN	PAWR	PRKC apoptosis WT1 regulator protein	1	STTSVSEEDVSSR	STTS(UniMod:21)VSEEDVSSR	2	STTS(UniMod:21)VSEEDVSSR2			157817
P18583	P18583	SON_HUMAN	SON	Protein SON	1	SVESTSPEPSK	SVESTS(UniMod:21)PEPSK	2	SVESTS(UniMod:21)PEPSK2	471381	396445	460475
Q9NR19	Q9NR19;C9JY31;F8WCJ4;C9JXD9;C9IYL0;B4DEH9	ACSA_HUMAN	ACSS2	Acetyl-coenzyme A synthetase, cytoplasmic	1	SWSPPPEVSR	SWS(UniMod:21)PPPEVSR	2	SWS(UniMod:21)PPPEVSR2		231650
P05787	P05787;F8W1U3;F8VQY3;F8VUG2	K2C8_HUMAN	KRT8	Keratin, type II cytoskeletal 8	1	SYTSGPGSR	SY(UniMod:21)TSGPGSR	2	SY(UniMod:21)TSGPGSR2	7.09079e+06	5.79756e+06	6.34365e+06
Q14241	Q14241	ELOA1_HUMAN	ELOA	Elongin-A	1	SYSPDHR	SYS(UniMod:21)PDHR	2	SYS(UniMod:21)PDHR2		352330	395855
Q9UKV3	Q9UKV3;E7EQT4;G3V3B0;S4R3H4	ACINU_HUMAN	ACIN1	Apoptotic chromatin condensation inducer in the nucleus	1	TAQVPSPPR	TAQVPS(UniMod:21)PPR	2	TAQVPS(UniMod:21)PPR2	639027	571485
Q8IYB3	Q8IYB3;M0R088;A9Z1X7	SRRM1_HUMAN	SRRM1	Serine/arginine repetitive matrix protein 1	1	TASPPPPPK	TAS(UniMod:21)PPPPPK	2	TAS(UniMod:21)PPPPPK2	1.04578e+06	1.07688e+06	857626
Q9UJV9	Q9UJV9;D6RD33;A0A499FJW5;D6RGI7	DDX41_HUMAN	DDX41	Probable ATP-dependent RNA helicase DDX41	1	TDEVPAGGSRSEAEDEDDEDYVPYVPLR	TDEVPAGGS(UniMod:21)RS(UniMod:21)EAEDEDDEDYVPYVPLR	3	TDEVPAGGS(UniMod:21)RS(UniMod:21)EAEDEDDEDYVPYVPLR3	296407	201944
E9PI86;E9PRH9;Q5T624	E9PI86;E9PPQ8;Q5T624;E9PRH9	E9PI86_HUMAN;E9PRH9_HUMAN;Q5T624_HUMAN	NASP	Nuclear autoantigenic sperm protein (Fragment)	1	TEDESLVENNDNIDETEGSEEDDK	TEDESLVENNDNIDETEGS(UniMod:21)EEDDK	3	TEDESLVENNDNIDETEGS(UniMod:21)EEDDK3	622713	822849	1.53089e+06
P05114	P05114;A6NL93;A6NEL0	HMGN1_HUMAN	HMGN1	Non-histone chromosomal protein HMG-14	1	TEESPASDEAGEK	TEESPAS(UniMod:21)DEAGEK	2	TEESPAS(UniMod:21)DEAGEK2	337620	309960	400707
Q15637	Q15637;A0A7P0T9U7	SF01_HUMAN	SF1	Splicing factor 1	1	TGDLGIPPNPEDRSPSPEPIYNSEGK	TGDLGIPPNPEDRS(UniMod:21)PS(UniMod:21)PEPIYNSEGK	3	TGDLGIPPNPEDRS(UniMod:21)PS(UniMod:21)PEPIYNSEGK3	2.99472e+06	2.41237e+06	2.40869e+06
P23588	P23588;E7EX17	IF4B_HUMAN	EIF4B	Eukaryotic translation initiation factor 4B	1	TGSESSQTGTSTTSSR	TGS(UniMod:21)ESSQTGTSTTSSR	2	TGS(UniMod:21)ESSQTGTSTTSSR2	506595	380308	485448
Q8WW12	Q8WW12	PCNP_HUMAN	PCNP	PEST proteolytic signal-containing nuclear protein	1	TLSVAAAFNEDEDSEPEEMPPEAK	TLSVAAAFNEDEDS(UniMod:21)EPEEMPPEAK	3	TLSVAAAFNEDEDS(UniMod:21)EPEEMPPEAK3	735822
P35221	P35221;G3XAM7	CTNA1_HUMAN	CTNNA1	Catenin alpha-1	1	TPEELDDSDFETEDFDVR	TPEELDDS(UniMod:21)DFETEDFDVR	3	TPEELDDS(UniMod:21)DFETEDFDVR3	185611	275982
Q14839	Q14839;A0A2U3TZM0;A0A2R8Y8C1;F5GWX5;A0A2R8YFK9;A0A2R8Y4X2;A0A2R8Y445;A0A2R8Y5M9;A0A2R8YER1;A0A2R8Y425;A0A2R8YE38;A0A2R8Y7M9;A0A2R8YD40;A0A2R8Y5J0;A0A2R8YDW2;A0A0C4DGG9;A0A2R8Y521;A0A2R8Y212	CHD4_HUMAN	CHD4	Chromodomain-helicase-DNA-binding protein 4	1	TPTPSTPGDTQPNTPAPVPPAEDGIK	TPTPSTPGDT(UniMod:21)QPNTPAPVPPAEDGIK	3	TPTPSTPGDT(UniMod:21)QPNTPAPVPPAEDGIK3	411826		377306
Q13428	Q13428;A0A6I8PRA0	TCOF_HUMAN	TCOF1	Treacle protein	1	TQPSSGVDSAVGTLPATSPQSTSVQAK	TQPSSGVDSAVGTLPAT(UniMod:21)SPQSTSVQAK	3	TQPSSGVDSAVGTLPAT(UniMod:21)SPQSTSVQAK3		388472	575966
Q01130	Q01130;J3QL05;J3KP15	SRSF2_HUMAN	SRSF2	Serine/arginine-rich splicing factor 2	1	TSPDTLR	TS(UniMod:21)PDTLR	2	TS(UniMod:21)PDTLR2	500737	487615	302084
Q01130	Q01130;J3QL05;J3KP15	SRSF2_HUMAN	SRSF2	Serine/arginine-rich splicing factor 2	1	TSPDTLRR	TS(UniMod:21)PDTLRR	2	TS(UniMod:21)PDTLRR2			792095
P49792	P49792	RBP2_HUMAN	RANBP2	E3 SUMO-protein ligase RanBP2	1	TSPENVQDR	TS(UniMod:21)PENVQDR	2	TS(UniMod:21)PENVQDR2	214558	234578	265371
Q9UQ35	Q9UQ35	SRRM2_HUMAN	SRRM2	Serine/arginine repetitive matrix protein 2	1	TSPPLLDR	TS(UniMod:21)PPLLDR	2	TS(UniMod:21)PPLLDR2	1.32467e+06	1.25136e+06	1.0577e+06
Q9H1E3	Q9H1E3	NUCKS_HUMAN	NUCKS1	Nuclear ubiquitous casein and cyclin-dependent kinase substrate 1	1	TSTSPPPEK	TSTS(UniMod:21)PPPEK	2	TSTS(UniMod:21)PPPEK2	1.97722e+06	3.0258e+06	5.12345e+06
P46821	P46821	MAP1B_HUMAN	MAP1B	Microtubule-associated protein 1B	1	TTSPPEVSGYSYEK	TTS(UniMod:21)PPEVSGYSYEK	2	TTS(UniMod:21)PPEVSGYSYEK2	461207
Q9UQ35	Q9UQ35	SRRM2_HUMAN	SRRM2	Serine/arginine repetitive matrix protein 2	1	TVARTPLGQR	TVART(UniMod:21)PLGQR	2	TVART(UniMod:21)PLGQR2		437805
O76094	O76094	SRP72_HUMAN	SRP72	Signal recognition particle subunit SRP72	1	TVSSPPTSPRPGSAATVSASTSNIIPPR	TVS(UniMod:21)SPPT(UniMod:21)SPRPGSAATVSASTSNIIPPR	3	TVS(UniMod:21)SPPT(UniMod:21)SPRPGSAATVSASTSNIIPPR3	570388
P16402	P16402	H13_HUMAN	H1-3	Histone H1.3	1	VAGAATPKK	VAGAAT(UniMod:21)PKK	2	VAGAAT(UniMod:21)PKK2		148080	106786
P49321	P49321	NASP_HUMAN	NASP	Nuclear autoantigenic sperm protein	1	VAQGATEKSPEDK	VAQGATEKS(UniMod:21)PEDK	2	VAQGATEKS(UniMod:21)PEDK2		126320
Q6NUQ4	Q6NUQ4;H7C0H8	TM214_HUMAN	TMEM214	Transmembrane protein 214	1	VATPPNQNQK	VAT(UniMod:21)PPNQNQK	2	VAT(UniMod:21)PPNQNQK2			87526.9
Q07955	Q07955;J3KSR8;J3KTL2	SRSF1_HUMAN	SRSF1	Serine/arginine-rich splicing factor 1	1	VDGPRSPSYGR	VDGPRS(UniMod:21)PSYGR	2	VDGPRS(UniMod:21)PSYGR2	473739
Q9H0G5	Q9H0G5;A0A024QZ33	NSRP1_HUMAN	NSRP1	Nuclear speckle splicing regulatory protein 1	1	VEENPDADSDFDAKSSADDEIEETR	VEENPDADS(UniMod:21)DFDAKS(UniMod:21)S(UniMod:21)ADDEIEETR	3	VEENPDADS(UniMod:21)DFDAKS(UniMod:21)S(UniMod:21)ADDEIEETR3	833577	890135	729120
Q99590	Q99590;A0A0A0MTP7;F8VXG7	SCAFB_HUMAN	SCAF11	Protein SCAF11	1	VETVSQPSESPK	VETVSQPSES(UniMod:21)PK	2	VETVSQPSES(UniMod:21)PK2		183577	194155
Q9NQ55	Q9NQ55;A0A0A6YYI3;A0A0B4J1V8;H7C446;A8MV53	SSF1_HUMAN	PPAN	Suppressor of SWI4 1 homolog	0	VGGSDEEASGIPSR	VGGS(UniMod:21)DEEASGIPSR	2	VGGS(UniMod:21)DEEASGIPSR2	2.05968e+06	2.16243e+06	2.21091e+06
Q5JSH3	Q5JSH3	WDR44_HUMAN	WDR44	WD repeat-containing protein 44	1	VGNESPVQELK	VGNES(UniMod:21)PVQELK	2	VGNES(UniMod:21)PVQELK2	472408
P23497	P23497;E9PHV6;H7C4B4;H7C1G8	SP100_HUMAN	SP100	Nuclear autoantigen Sp-100	1	VIGQDHDFSESSEEEAPAEASSGALR	VIGQDHDFS(UniMod:21)ES(UniMod:21)S(UniMod:21)EEEAPAEASSGALR	3	VIGQDHDFS(UniMod:21)ES(UniMod:21)S(UniMod:21)EEEAPAEASSGALR3	910238
Q96EV2	Q96EV2;H0Y3K4	RBM33_HUMAN	RBM33	RNA-binding protein 33	1	VKPASPVAQPK	VKPAS(UniMod:21)PVAQPK	2	VKPAS(UniMod:21)PVAQPK2	307276	333220	304370
Q9UQ35	Q9UQ35;I3L4D8;I3L182	SRRM2_HUMAN	SRRM2	Serine/arginine repetitive matrix protein 2	1	VKPETPPR	VKPET(UniMod:21)PPR	2	VKPET(UniMod:21)PPR2	597597	569834	542649
Q8N8A6	Q8N8A6	DDX51_HUMAN	DDX51	ATP-dependent RNA helicase DDX51	1	VNDAEPGSPEAPQGK	VNDAEPGS(UniMod:21)PEAPQGK	2	VNDAEPGS(UniMod:21)PEAPQGK2		220147
P29966	P29966	MARCS_HUMAN	MARCKS	Myristoylated alanine-rich C-kinase substrate	1	VNGDASPAAAESGAK	VNGDAS(UniMod:21)PAAAESGAK	2	VNGDAS(UniMod:21)PAAAESGAK2	490381	558078
P11388	P11388	TOP2A_HUMAN	TOP2A	DNA topoisomerase 2-alpha	1	VPDEEENEESDNEK	VPDEEENEES(UniMod:21)DNEK	2	VPDEEENEES(UniMod:21)DNEK2	2.42902e+06	3.49926e+06	3.56173e+06
Q8NAV1	Q8NAV1	PR38A_HUMAN	PRPF38A	Pre-mRNA-splicing factor 38A	1	VPSPDHR	VPS(UniMod:21)PDHR	2	VPS(UniMod:21)PDHR2	1.0863e+06	896885	969827
Q9Y4F1	Q9Y4F1;A0A1B0GV68;C9JME2	FARP1_HUMAN	FARP1	FERM, ARHGEF and pleckstrin domain-containing protein 1	1	VSAGEPGSHPSPAPR	VSAGEPGSHPS(UniMod:21)PAPR	2	VSAGEPGSHPS(UniMod:21)PAPR2	548579	463002	466770
Q9UPU5	Q9UPU5	UBP24_HUMAN	USP24	Ubiquitin carboxyl-terminal hydrolase 24	1	VSDQNSPVLPK	VSDQNS(UniMod:21)PVLPK	2	VSDQNS(UniMod:21)PVLPK2	709367	645644	831589
Q9UQ35	Q9UQ35	SRRM2_HUMAN	SRRM2	Serine/arginine repetitive matrix protein 2	1	VSGRTSPPLLDR	VSGRTS(UniMod:21)PPLLDR	2	VSGRTS(UniMod:21)PPLLDR2	1.2856e+06	1.03226e+06
Q8IYB3	Q8IYB3;M0R088;A9Z1X7	SRRM1_HUMAN	SRRM1	Serine/arginine repetitive matrix protein 1	1	VSHSPPPK	VSHS(UniMod:21)PPPK	2	VSHS(UniMod:21)PPPK2	82580	80368.6
Q6UN15	Q6UN15;A0A0B4J203	FIP1_HUMAN	FIP1L1	Pre-mRNA 3'-end-processing factor FIP1	1	VTETEDDSDSDSDDDEDDVHVTIGDIK	VTETEDDS(UniMod:21)DS(UniMod:21)DS(UniMod:21)DDDEDDVHVTIGDIK	3	VTETEDDS(UniMod:21)DS(UniMod:21)DS(UniMod:21)DDDEDDVHVTIGDIK3
Q8WWI1	Q8WWI1;E9PMS6;E9PMT2;F8WD26;A0A0A0MTE2;J3KP06;E9PMP7;H0Y424	LMO7_HUMAN	LMO7	LIM domain only protein 7	1	VTTEIQLPSQSPVEEQSPASLSSLR	VTTEIQLPSQS(UniMod:21)PVEEQSPASLSSLR	3	VTTEIQLPSQS(UniMod:21)PVEEQSPASLSSLR3	141515	185415	119707
Q9H1E3	Q9H1E3	NUCKS_HUMAN	NUCKS1	Nuclear ubiquitous casein and cyclin-dependent kinase substrate 1	1	VVDYSQFQESDDADEDYGRDSGPPTK	VVDYSQFQES(UniMod:21)DDADEDYGRDSGPPTK	3	VVDYSQFQES(UniMod:21)DDADEDYGRDSGPPTK3	6.20845e+06	5.76833e+06	8.05619e+06
P19338	P19338;A0A7I2V3F3;A0A7I2V349;H7BY16;A0A7I2V2S8;A0A7I2V5M5;A0A7I2V506;A0A7I2V2U7;C9JLB1;A0A7I2V699;A0A7I2V428	NUCL_HUMAN	NCL	Nucleolin	1	VVVSPTKK	VVVS(UniMod:21)PTKK	2	VVVS(UniMod:21)PTKK2		265819
A0A7I2V647	Q9UN86;A0A7I2YQD9;A0A7I2V647;A0A7I2YQS2;A0A7I2V3E2;A0A7I2V3P9;D6RB17	A0A7I2V647_HUMAN	G3BP2	Ras GTPase-activating protein-binding protein 2	1	YEDEVFGDSEPELDEESEDEVEEEQEER	YEDEVFGDS(UniMod:21)EPELDEES(UniMod:21)EDEVEEEQEER	3	YEDEVFGDS(UniMod:21)EPELDEES(UniMod:21)EDEVEEEQEER3	1.34922e+06	1.05722e+06	947047
Q04323	Q04323;A0A087WTZ5;E9PJ81;E9PRQ7;E9PS08	UBXN1_HUMAN	UBXN1	UBX domain-containing protein 1	1	YGGSVGSQPPPVAPEPGPVPSSPSQEPPTK	YGGSVGSQPPPVAPEPGPVPSS(UniMod:21)PSQEPPTK	3	YGGSVGSQPPPVAPEPGPVPSS(UniMod:21)PSQEPPTK3	880562		1.15843e+06
Q9BVV8	Q9BVV8	F174C_HUMAN	FAM174C	Protein FAM174C	1	YGLLANTEDPTEMASLDSDEETVFESR	YGLLANT(UniMod:21)EDPTEMASLDS(UniMod:21)DEETVFESR	3	YGLLANT(UniMod:21)EDPTEMASLDS(UniMod:21)DEETVFESR3	73634.7	44113.3
Q9UQ35	Q9UQ35;I3L4D8;I3L182	SRRM2_HUMAN	SRRM2	Serine/arginine repetitive matrix protein 2	1	YSHSGSSSPDTK	YSHSGSSS(UniMod:21)PDTK	2	YSHSGSSS(UniMod:21)PDTK2	149890	141354	172468

## Sheet: 1000cells
Protein.Group	Protein.Ids	Protein.Names	Genes	First.Protein.Description	Proteotypic	Stripped.Sequence	Modified.Sequence	Precursor.Charge	Precursor.Id	G:\WUCI\1E3_2_DIA.raw	G:\WUCI\1E3_3_DIA.raw	G:\WUCI\1E3_4_DIA.raw
Q1KMD3	Q1KMD3;H3BQZ7	HNRL2_HUMAN	HNRNPUL2	Heterogeneous nuclear ribonucleoprotein U-like protein 2	0	AAEEQGDDQDSEK	AAEEQGDDQDS(UniMod:21)EK	2	AAEEQGDDQDS(UniMod:21)EK2	454193	513109	487696
O76021	O76021;J3QSV6	RL1D1_HUMAN	RSL1D1	Ribosomal L1 domain-containing protein 1	1	AAESETPGKSPEK	AAESETPGKS(UniMod:21)PEK	2	AAESETPGKS(UniMod:21)PEK2	1.25302e+06	1.3933e+06	1.15669e+06
Q14676	Q14676	MDC1_HUMAN	MDC1	Mediator of DNA damage checkpoint protein 1	1	AAESLTAIPEPASPQLLETPIHASQIQK	AAESLTAIPEPAS(UniMod:21)PQLLETPIHASQIQK	3	AAESLTAIPEPAS(UniMod:21)PQLLETPIHASQIQK3	260098
Q86U86	Q86U86	PB1_HUMAN	PBRM1	Protein polybromo-1	1	AAQQQQPSASPR	AAQQQQPSAS(UniMod:21)PR	2	AAQQQQPSAS(UniMod:21)PR2	81843.4	51164.5
Q04637	Q04637;E7EX73;E9PGM1;E7EUU4;A0A7I2Y1C3	IF4G1_HUMAN	EIF4G1	Eukaryotic translation initiation factor 4 gamma 1	1	AASLTEDRDR	AAS(UniMod:21)LTEDRDR	2	AAS(UniMod:21)LTEDRDR2	2.55085e+06	2.02877e+06	2.45128e+06
Q8IYB3	Q8IYB3;A9Z1X7	SRRM1_HUMAN	SRRM1	Serine/arginine repetitive matrix protein 1	1	AASPSPQSVR	AAS(UniMod:21)PSPQSVR	2	AAS(UniMod:21)PSPQSVR2	1.18319e+06	1.32608e+06	923604
Q13428	Q13428;H0Y8Y7;E7ETY2;A0A6I8PRA0;A0A3B3IS06	TCOF_HUMAN	TCOF1	Treacle protein	1	AASAPAKESPR	AASAPAKES(UniMod:21)PR	2	AASAPAKES(UniMod:21)PR2	98512.1	77357.4	81360.6
Q96ST2	Q96ST2	IWS1_HUMAN	IWS1	Protein IWS1 homolog	1	AAVLSDSEDEEK	AAVLS(UniMod:21)DS(UniMod:21)EDEEK	2	AAVLS(UniMod:21)DS(UniMod:21)EDEEK2	1.92615e+06	1.89347e+06	1.81787e+06
Q96ST2	Q96ST2	IWS1_HUMAN	IWS1	Protein IWS1 homolog	1	AAVLSDSEDEEK	AAVLS(UniMod:21)DSEDEEK	2	AAVLS(UniMod:21)DSEDEEK2		441452
Q96ST2	Q96ST2	IWS1_HUMAN	IWS1	Protein IWS1 homolog	1	AAVLSDSEDEEK	AAVLSDS(UniMod:21)EDEEK	2	AAVLSDS(UniMod:21)EDEEK2	395775		429212
O15541	O15541	R113A_HUMAN	RNF113A	E3 ubiquitin-protein ligase RNF113A	1	AAYGDLSSEEEEENEPESLGVVYK	AAYGDLS(UniMod:21)S(UniMod:21)EEEEENEPESLGVVYK	3	AAYGDLS(UniMod:21)S(UniMod:21)EEEEENEPESLGVVYK3	934934	653942	773212
Q92538	Q92538;A0A669KBG8;A0A7I2V3Y5;A0A7I2V4K2;A0A669KB10;A0A7I2V452;A0A7I2V2L4;A0A7I2V2L5;A0A7I2V529;A0A7I2YQ65;A0A7I2V514;A0A7I2YQM2;A0A7P0RGV0	GBF1_HUMAN	GBF1	Golgi-specific brefeldin A-resistance guanine nucleotide exchange factor 1	1	ADAPDAGAQSDSELPSYHQNDVSLDR	ADAPDAGAQS(UniMod:21)DSELPSYHQNDVSLDR	3	ADAPDAGAQS(UniMod:21)DSELPSYHQNDVSLDR3	2.30257e+06	2.67798e+06	2.46518e+06
Q3YEC7	Q3YEC7	RABL6_HUMAN	RABL6	Rab-like protein 6	1	ADDFPVRDDPSDVTDEDEGPAEPPPPPK	ADDFPVRDDPS(UniMod:21)DVT(UniMod:21)DEDEGPAEPPPPPK	3	ADDFPVRDDPS(UniMod:21)DVT(UniMod:21)DEDEGPAEPPPPPK3	161881	86268.3	212282
P49327	P49327;A0A0U1RQF0	FAS_HUMAN	FASN	Fatty acid synthase	1	ADEASELACPTPKEDGLAQQQTQLNLR	ADEASELAC(UniMod:4)PT(UniMod:21)PKEDGLAQQQTQLNLR	3	ADEASELAC(UniMod:4)PT(UniMod:21)PKEDGLAQQQTQLNLR3	469513	333772	824701
P50502;Q8IZP2	P50502;Q8IZP2;F6VDH7	F10A1_HUMAN;ST134_HUMAN	ST13;ST13P4	Hsc70-interacting protein	0	ADEPSSEESDLEIDK	ADEPS(UniMod:21)S(UniMod:21)EES(UniMod:21)DLEIDK	2	ADEPS(UniMod:21)S(UniMod:21)EES(UniMod:21)DLEIDK2	4.35468e+06	4.52512e+06	3.63761e+06
P50502;Q8IZP2	P50502;Q8IZP2;F6VDH7	F10A1_HUMAN;ST134_HUMAN	ST13;ST13P4	Hsc70-interacting protein	0	ADEPSSEESDLEIDK	ADEPSS(UniMod:21)EES(UniMod:21)DLEIDK	2	ADEPSS(UniMod:21)EES(UniMod:21)DLEIDK2	5.94421e+06	6.14327e+06	5.28593e+06
Q09666	Q09666	AHNK_HUMAN	AHNAK	Neuroblast differentiation-associated protein AHNAK	1	ADIDVSGPKVDVDIPDVNIEGPDAK	ADIDVS(UniMod:21)GPKVDVDIPDVNIEGPDAK	3	ADIDVS(UniMod:21)GPKVDVDIPDVNIEGPDAK3		30630.9	98915.8
Q96HH9	Q96HH9;D6REP5;E9PD09;B7Z4W8	GRM2B_HUMAN	GRAMD2B	GRAM domain-containing protein 2B	1	ADRPSSLPLDFNDEFSDLDGVVQQR	ADRPSSLPLDFNDEFS(UniMod:21)DLDGVVQQR	3	ADRPSSLPLDFNDEFS(UniMod:21)DLDGVVQQR3	79320.7	71009.2	137419
P49815	P49815;X5D2U8;A0A2R8YGU4;A0A2R8YDZ2;A0A2R8Y6C9;A0A2R8Y7X5;A0A2R8YDR3;A0A2R8Y7C8;A0A2R8Y5F1;H3BMQ0;A0A2R8YGD6;A0A2R8Y670;H3BQK4	TSC2_HUMAN	TSC2	Tuberin	1	ADVGRLSPEVK	ADVGRLS(UniMod:21)PEVK	2	ADVGRLS(UniMod:21)PEVK2	299098	248959	317384
P51636	P51636;E9PCT3	CAV2_HUMAN	CAV2	Caveolin-2	1	ADVQLFMDDDSYSHHSGLEYADPEK	ADVQLFMDDDS(UniMod:21)YSHHS(UniMod:21)GLEYADPEK	3	ADVQLFMDDDS(UniMod:21)YSHHS(UniMod:21)GLEYADPEK3	940249	1.21702e+06	1.22532e+06
Q09666	Q09666	AHNK_HUMAN	AHNAK	Neuroblast differentiation-associated protein AHNAK	1	AEAPLPSPK	AEAPLPS(UniMod:21)PK	2	AEAPLPS(UniMod:21)PK2	1.02104e+06	908797	949514
Q9P1Y6	Q9P1Y6;B7ZM65;A0A0J9YYB5;E9PJ24;F8WEF5;A0A0J9YWD5;A0A0J9YX88	PHRF1_HUMAN	PHRF1	PHD and RING finger domain-containing protein 1	1	AEAPSSPDVAPAGK	AEAPS(UniMod:21)SPDVAPAGK	2	AEAPS(UniMod:21)SPDVAPAGK2	175023	191164	194902
P29966	P29966	MARCS_HUMAN	MARCKS	Myristoylated alanine-rich C-kinase substrate	1	AEDGATPSPSNETPK	AEDGATPS(UniMod:21)PSNETPK	2	AEDGATPS(UniMod:21)PSNETPK2	1.31524e+06	1.6938e+06	1.35019e+06
P29966	P29966	MARCS_HUMAN	MARCKS	Myristoylated alanine-rich C-kinase substrate	1	AEDGATPSPSNETPK	AEDGATPSPSNET(UniMod:21)PK	2	AEDGATPSPSNET(UniMod:21)PK2	4.20329e+06	4.27831e+06	3.63053e+06
P29966	P29966	MARCS_HUMAN	MARCKS	Myristoylated alanine-rich C-kinase substrate	1	AEDGATPSPSNETPKK	AEDGATPSPSNET(UniMod:21)PKK	2	AEDGATPSPSNET(UniMod:21)PKK2	1.11934e+06	930430	1.06421e+06
Q9H0D6	Q9H0D6	XRN2_HUMAN	XRN2	5'-3' exoribonuclease 2	1	AEDSDSEPEPEDNVR	AEDS(UniMod:21)DS(UniMod:21)EPEPEDNVR	2	AEDS(UniMod:21)DS(UniMod:21)EPEPEDNVR2	30575.6	35281
P27824	P27824;A0A7P0TAE9;A0A7P0TB65;D6RGY2;A0A7P0T937;A0A7P0Z484	CALX_HUMAN	CANX	Calnexin	1	AEEDEILNRSPR	AEEDEILNRS(UniMod:21)PR	2	AEEDEILNRS(UniMod:21)PR2	6.73904e+07	5.9922e+07	5.9235e+07
Q15459	Q15459;H7C1L2	SF3A1_HUMAN	SF3A1	Splicing factor 3A subunit 1	1	AEEPPSQLDQDTQVQDMDEGSDDEEEGQK	AEEPPSQLDQDTQVQDMDEGS(UniMod:21)DDEEEGQK	3	AEEPPSQLDQDTQVQDMDEGS(UniMod:21)DDEEEGQK3	6.06062e+06	6.19396e+06	5.67295e+06
P80723	P80723;U3KQP0	BASP1_HUMAN	BASP1	Brain acid soluble protein 1	1	AEGAATEEEGTPK	AEGAATEEEGT(UniMod:21)PK	2	AEGAATEEEGT(UniMod:21)PK2	760222	666474	672539
P80723	P80723	BASP1_HUMAN	BASP1	Brain acid soluble protein 1	1	AEGAATEEEGTPKESEPQAAAEPAEAK	AEGAATEEEGT(UniMod:21)PKESEPQAAAEPAEAK	3	AEGAATEEEGT(UniMod:21)PKESEPQAAAEPAEAK3	91717.9	170333	92027.6
A0A0G2JJB9;Q5STZ8	Q8NE71;Q5STZ8;A0A0G2JJB9	A0A0G2JJB9_HUMAN;Q5STZ8_HUMAN	ABCF1	ATP-binding cassette sub-family F member 1 (Fragment)	1	AEQGSEEEGEGEEEEEEGGESK	AEQGS(UniMod:21)EEEGEGEEEEEEGGESK	3	AEQGS(UniMod:21)EEEGEGEEEEEEGGESK3	202688	179775	138348
P21333	P21333;Q60FE5	FLNA_HUMAN	FLNA	Filamin-A	1	AFGPGLQGGSAGSPAR	AFGPGLQGGSAGS(UniMod:21)PAR	2	AFGPGLQGGSAGS(UniMod:21)PAR2	2.61954e+06	2.61427e+06	2.19855e+06
Q8N9T8	Q8N9T8;A0A494C108;F8WFC1;H0YFD2	KRI1_HUMAN	KRI1	Protein KRI1 homolog	1	AFVEDSEDEDGAGEGGSSLLQK	AFVEDS(UniMod:21)EDEDGAGEGGSSLLQK	3	AFVEDS(UniMod:21)EDEDGAGEGGSSLLQK3	471862	459949	406225
O95365	O95365	ZBT7A_HUMAN	ZBTB7A	Zinc finger and BTB domain-containing protein 7A	1	AGAAAGDSDEESRADDK	AGAAAGDS(UniMod:21)DEESRADDK	2	AGAAAGDS(UniMod:21)DEESRADDK2	328639	327986	276125
P51858	P51858	HDGF_HUMAN	HDGF	Hepatoma-derived growth factor	1	AGDLLEDSPK	AGDLLEDS(UniMod:21)PK	2	AGDLLEDS(UniMod:21)PK2	2.26301e+07	2.10516e+07	2.05657e+07
P51858	P51858	HDGF_HUMAN	HDGF	Hepatoma-derived growth factor	1	AGDLLEDSPKR	AGDLLEDS(UniMod:21)PKR	2	AGDLLEDS(UniMod:21)PKR2	471686	400247
Q9Y320	Q9Y320	TMX2_HUMAN	TMX2	Thioredoxin-related transmembrane protein 2	1	AGDNIPEEQPVASTPTTVSDGENKK	AGDNIPEEQPVASTPT(UniMod:21)TVSDGENKK	3	AGDNIPEEQPVASTPT(UniMod:21)TVSDGENKK3	440626	434088	451133
Q08J23	Q08J23	NSUN2_HUMAN	NSUN2	RNA cytosine C(5)-methyltransferase NSUN2	1	AGEPNSPDAEEANSPDVTAGCDPAGVHPPR	AGEPNS(UniMod:21)PDAEEANSPDVTAGC(UniMod:4)DPAGVHPPR	3	AGEPNS(UniMod:21)PDAEEANSPDVTAGC(UniMod:4)DPAGVHPPR3	5.39212e+06	4.89025e+06	4.69872e+06
Q92522	Q92522	H1X_HUMAN	H1-10	Histone H1.10	1	AGGSAALSPSK	AGGSAALS(UniMod:21)PSK	2	AGGSAALS(UniMod:21)PSK2	3.2064e+06	3.0764e+06	3.08829e+06
O60832	O60832	DKC1_HUMAN	DKC1	H/ACA ribonucleoprotein complex subunit DKC1	1	AGLESGAEPGDGDSDTTK	AGLESGAEPGDGDS(UniMod:21)DTTK	2	AGLESGAEPGDGDS(UniMod:21)DTTK2	5.15211e+06	5.32117e+06	4.67005e+06
Q9UQ35	Q9UQ35	SRRM2_HUMAN	SRRM2	Serine/arginine repetitive matrix protein 2	1	AGMSSNQSISSPVLDAVPR	AGMSSNQSISS(UniMod:21)PVLDAVPR	3	AGMSSNQSISS(UniMod:21)PVLDAVPR3	166035	171820	114446
Q9H3Q1	Q9H3Q1	BORG4_HUMAN	CDC42EP4	Cdc42 effector protein 4	1	AGPDLPSLPSHALEDEGWAAAAPSPGSAR	AGPDLPSLPSHALEDEGWAAAAPS(UniMod:21)PGSAR	3	AGPDLPSLPSHALEDEGWAAAAPS(UniMod:21)PGSAR3	276659	280668	428870
Q9NRY4	Q9NRY4	RHG35_HUMAN	ARHGAP35	Rho GTPase-activating protein 35	1	AGSPLCNSNLQDSEEDIEPSYSLFR	AGSPLC(UniMod:4)NS(UniMod:21)NLQDSEEDIEPSYSLFR	3	AGSPLC(UniMod:4)NS(UniMod:21)NLQDSEEDIEPSYSLFR3	120642	151386	154245
P36871	P36871;A0A3B3ITK7	PGM1_HUMAN	PGM1	Phosphoglucomutase-1	1	AIGGIILTASHNPGGPNGDFGIK	AIGGIILT(UniMod:21)ASHNPGGPNGDFGIK	3	AIGGIILT(UniMod:21)ASHNPGGPNGDFGIK3	1.25668e+06	1.39987e+06	1.05253e+06
Q8N1F8	Q8N1F8	S11IP_HUMAN	STK11IP	Serine/threonine-protein kinase 11-interacting protein	1	AKNSPPQAPSTR	AKNS(UniMod:21)PPQAPSTR	2	AKNS(UniMod:21)PPQAPSTR2		120015	183230
Q8IY81	Q8IY81	SPB1_HUMAN	FTSJ3	pre-rRNA 2'-O-ribose RNA methyltransferase FTSJ3	1	ALDISLSSGEEDEGDEEDSTAGTTK	ALDISLS(UniMod:21)S(UniMod:21)GEEDEGDEEDSTAGTTK	3	ALDISLS(UniMod:21)S(UniMod:21)GEEDEGDEEDSTAGTTK3	1.00437e+06	1.02621e+06	1.10206e+06
Q8N3E9	Q8N3E9	PLCD3_HUMAN	PLCD3	1-phosphatidylinositol 4,5-bisphosphate phosphodiesterase delta-3	1	ALSDREEEEEDDEEEEEEVEAAAQR	ALS(UniMod:21)DREEEEEDDEEEEEEVEAAAQR	3	ALS(UniMod:21)DREEEEEDDEEEEEEVEAAAQR3	532858	510983	504887
P11717	P11717;A0A7I2V657	MPRI_HUMAN	IGF2R	Cation-independent mannose-6-phosphate receptor	1	ALSSLHGDDQDSEDEVLTIPEVK	ALS(UniMod:21)S(UniMod:21)LHGDDQDSEDEVLTIPEVK	3	ALS(UniMod:21)S(UniMod:21)LHGDDQDSEDEVLTIPEVK3	173290
P11717	P11717;A0A7I2V657	MPRI_HUMAN	IGF2R	Cation-independent mannose-6-phosphate receptor	1	ALSSLHGDDQDSEDEVLTIPEVK	ALSS(UniMod:21)LHGDDQDS(UniMod:21)EDEVLTIPEVK	3	ALSS(UniMod:21)LHGDDQDS(UniMod:21)EDEVLTIPEVK3		186577	243760
Q86VR2	Q86VR2;K7EQI9	RETR3_HUMAN	RETREG3	Reticulophagy regulator 3	1	AMDNHSDSEEELAAFCPQLDDSTVAR	AMDNHS(UniMod:21)DS(UniMod:21)EEELAAFC(UniMod:4)PQLDDSTVAR	3	AMDNHS(UniMod:21)DS(UniMod:21)EEELAAFC(UniMod:4)PQLDDSTVAR3	498922	482257	507995
O15530;Q6A1A2	Q6A1A2;O15530;E9PER6	PDPK1_HUMAN;PDPK2_HUMAN	PDPK1;PDPK2P	3-phosphoinositide-dependent protein kinase 1	0	ANSFVGTAQYVSPELLTEK	ANSFVGT(UniMod:21)AQYVSPELLTEK	3	ANSFVGT(UniMod:21)AQYVSPELLTEK3	169788	99119.5	127776
Q8IYB3	Q8IYB3;M0R088;A9Z1X7	SRRM1_HUMAN	SRRM1	Serine/arginine repetitive matrix protein 1	1	APQTSSSPPPVR	APQTSSS(UniMod:21)PPPVR	2	APQTSSS(UniMod:21)PPPVR2	3.61694e+06	3.96585e+06	3.78947e+06
Q14980	Q14980;F5H6Y5;F5H0Z7;F5H4J1;F5H763	NUMA1_HUMAN	NUMA1	Nuclear mitotic apparatus protein 1	1	APVPSTCSSTFPEELSPPSHQAK	APVPSTC(UniMod:4)SSTFPEELS(UniMod:21)PPSHQAK	3	APVPSTC(UniMod:4)SSTFPEELS(UniMod:21)PPSHQAK3	922981	818890	593063
Q13200	Q13200;F8WBS8;C9JPC0	PSMD2_HUMAN	PSMD2	26S proteasome non-ATPase regulatory subunit 2	1	APVQPQQSPAAAPGGTDEKPSGK	APVQPQQS(UniMod:21)PAAAPGGTDEKPSGK	3	APVQPQQS(UniMod:21)PAAAPGGTDEKPSGK3	806770	876731	795302
Q9GZR7	Q9GZR7;G3V529	DDX24_HUMAN	DDX24	ATP-dependent RNA helicase DDX24	1	AQAVSEEEEEEEGK	AQAVS(UniMod:21)EEEEEEEGK	2	AQAVS(UniMod:21)EEEEEEEGK2	1.43413e+06	1.53903e+06	1.46525e+06
O94979	O94979;H0YAB3;D6RHZ5;D6REX3;H7BXG7	SC31A_HUMAN	SEC31A	Protein transport protein Sec31A	1	AQGEPVAGHESPK	AQGEPVAGHES(UniMod:21)PK	2	AQGEPVAGHES(UniMod:21)PK2	571796	431175	499550
O94979	O94979;H0YAB3;D6RHZ5;D6REX3;H7BXG7	SC31A_HUMAN	SEC31A	Protein transport protein Sec31A	1	AQGEPVAGHESPKIPYEK	AQGEPVAGHES(UniMod:21)PKIPYEK	3	AQGEPVAGHES(UniMod:21)PKIPYEK3	228015	166957	111342
Q15149	Q15149;A0A8I5KYZ1;A0A8I5KSD5;E9PMV1;A0A8I5KUE3;H0YDN1	PLEC_HUMAN	PLEC	Plectin	1	AQLEPVASPAK	AQLEPVAS(UniMod:21)PAK	2	AQLEPVAS(UniMod:21)PAK2	427785	475439	416100
Q14676	Q14676	MDC1_HUMAN	MDC1	Mediator of DNA damage checkpoint protein 1	1	AQPFGFIDSDTDAEEERIPATPVVIPMK	AQPFGFIDS(UniMod:21)DTDAEEERIPATPVVIPMK	3	AQPFGFIDS(UniMod:21)DTDAEEERIPATPVVIPMK3	716535	788464
Q9UQ35	Q9UQ35;I3L4D8	SRRM2_HUMAN	SRRM2	Serine/arginine repetitive matrix protein 2	1	AQTPPGPSLSGSK	AQT(UniMod:21)PPGPSLSGSK	2	AQT(UniMod:21)PPGPSLSGSK2	3.44361e+06	3.37408e+06	2.87435e+06
Q01082	Q01082;A0A087WUZ3	SPTB2_HUMAN	SPTBN1	Spectrin beta chain, non-erythrocytic 1	1	AQTLPTSVVTITSESSPGKR	AQTLPTSVVTITS(UniMod:21)ESSPGKR	3	AQTLPTSVVTITS(UniMod:21)ESSPGKR3	541647	639852	661260
Q13247	Q13247	SRSF6_HUMAN	SRSF6	Serine/arginine-rich splicing factor 6	1	ARSVSPPPK	ARS(UniMod:21)VS(UniMod:21)PPPK	2	ARS(UniMod:21)VS(UniMod:21)PPPK2	2.41184e+07	1.80534e+07	2.28245e+07
Q9C0E8	Q9C0E8	LNP_HUMAN	LNPK	Endoplasmic reticulum junction formation protein lunapark	1	ASDSEEPEEK	AS(UniMod:21)DSEEPEEK	2	AS(UniMod:21)DSEEPEEK2	118673	116609
Q8IU81	Q8IU81	I2BP1_HUMAN	IRF2BP1	Interferon regulatory factor 2-binding protein 1	1	ASPEPEGEAAGK	AS(UniMod:21)PEPEGEAAGK	2	AS(UniMod:21)PEPEGEAAGK2	184263	174487
Q9H1B7	Q9H1B7	I2BPL_HUMAN	IRF2BPL	Probable E3 ubiquitin-protein ligase IRF2BPL	1	ASPEPPDSAEGALK	AS(UniMod:21)PEPPDSAEGALK	2	AS(UniMod:21)PEPPDSAEGALK2		88446.2	73346.7
O00273	O00273	DFFA_HUMAN	DFFA	DNA fragmentation factor subunit alpha	1	ASPPGDLQNPK	AS(UniMod:21)PPGDLQNPK	2	AS(UniMod:21)PPGDLQNPK2	1.42331e+06	1.33852e+06	1.05346e+06
Q9Y2W1	Q9Y2W1;A0A3B3ITZ9	TR150_HUMAN	THRAP3	Thyroid hormone receptor-associated protein 3	1	ASAVSELSPR	ASAVSELS(UniMod:21)PR	2	ASAVSELS(UniMod:21)PR2	6.06445e+06	5.09414e+06	5.09984e+06
Q9BZZ5	Q9BZZ5;G3V1C3;H0YER7	API5_HUMAN	API5	Apoptosis inhibitor 5	1	ASEDTTSGSPPKK	ASEDTTSGS(UniMod:21)PPKK	2	ASEDTTSGS(UniMod:21)PPKK2	221671	228306	264032
Q5JSH3	Q5JSH3	WDR44_HUMAN	WDR44	WD repeat-containing protein 44	1	ASESDTEEFYDAPEDVHLGGGYPVGSPGK	ASES(UniMod:21)DT(UniMod:21)EEFYDAPEDVHLGGGYPVGSPGK	3	ASES(UniMod:21)DT(UniMod:21)EEFYDAPEDVHLGGGYPVGSPGK3	89915.7	100681	95096.4
Q8NDT2	Q8NDT2	RB15B_HUMAN	RBM15B	Putative RNA-binding protein 15B	1	ASGDPGASGMSPR	ASGDPGASGMS(UniMod:21)PR	2	ASGDPGASGMS(UniMod:21)PR2	101149	99440.5	94908.5
Q9UKV3	Q9UKV3;E7EQT4;S4R3H4	ACINU_HUMAN	ACIN1	Apoptotic chromatin condensation inducer in the nucleus	1	ASLVALPEQTASEEETPPPLLTK	ASLVALPEQTAS(UniMod:21)EEETPPPLLTK	3	ASLVALPEQTAS(UniMod:21)EEETPPPLLTK3	196532	303147	289892
P46379	P46379;A0A7I2V508;A0A024RCR6;A0A0G2JL47;A0A7P0MQS5;H0Y710;A0A0G2JK23	BAG6_HUMAN	BAG6	Large proline-rich protein BAG6	1	ASPEPQRENASPAPGTTAEEAMSR	ASPEPQRENAS(UniMod:21)PAPGTTAEEAMSR	3	ASPEPQRENAS(UniMod:21)PAPGTTAEEAMSR3	322806	351904	352739
Q02880	Q02880	TOP2B_HUMAN	TOP2B	DNA topoisomerase 2-beta	1	ASPITNDGEDEFVPSDGLDKDEYTFSPGK	ASPIT(UniMod:21)NDGEDEFVPSDGLDKDEYTFSPGK	3	ASPIT(UniMod:21)NDGEDEFVPSDGLDKDEYTFSPGK3			414369
P02545	P02545;A0A6Q8PHQ9;Q3BDU5;A0A804HL68;Q5TCI8;A0A6Q8PFJ0	LMNA_HUMAN	LMNA	Prelamin-A/C	1	ASSHSSQTQGGGSVTKK	ASS(UniMod:21)HS(UniMod:21)SQTQGGGSVTKK	3	ASS(UniMod:21)HS(UniMod:21)SQTQGGGSVTKK3	221064		139690
Q14978	Q14978;A0A0A0MRM9	NOLC1_HUMAN	NOLC1	Nucleolar and coiled-body phosphoprotein 1	1	ASSPFRR	ASS(UniMod:21)PFRR	2	ASS(UniMod:21)PFRR2	5.07948e+06	5.06476e+06	4.59948e+06
Q9NWB6	Q9NWB6	ARGL1_HUMAN	ARGLU1	Arginine and glutamate-rich protein 1	1	ASSPPDRIDIFGR	ASS(UniMod:21)PPDRIDIFGR	2	ASS(UniMod:21)PPDRIDIFGR2	1.82057e+06	1.74301e+06	1.55251e+06
Q9NSU2	Q9NSU2;C9J052	TREX1_HUMAN	TREX1	Three-prime repair exonuclease 1	1	ASSPSEHGPR	ASS(UniMod:21)PSEHGPR	2	ASS(UniMod:21)PSEHGPR2	185792	211436	220348
Q9UHB6	Q9UHB6;F8VS07;F8VRN8;F8VQE1	LIMA1_HUMAN	LIMA1	LIM domain and actin-binding protein 1	1	ASSLSESSPPK	ASSLSESS(UniMod:21)PPK	2	ASSLSESS(UniMod:21)PPK2	830990	774932	747861
Q13428	Q13428;H0Y8Y7;E7ETY2	TCOF_HUMAN	TCOF1	Treacle protein	1	ASSVSTKESPAR	ASSVSTKES(UniMod:21)PAR	2	ASSVSTKES(UniMod:21)PAR2	185392	158155	157825
P29692	P29692;E9PI39;E9PRY8;E9PPR1;E9PK01;E9PL12;E9PQZ1;A0A087X1X7;E9PK06;E9PQ49;E9PL71	EF1D_HUMAN	EEF1D	Elongation factor 1-delta	1	ATAPQTQHVSPMR	ATAPQTQHVS(UniMod:21)PMR	2	ATAPQTQHVS(UniMod:21)PMR2	1.08728e+07	9.96004e+06	9.41817e+06
P29692	P29692;E9PI39;E9PRY8;E9PPR1;E9PK01;E9PL12;E9PQZ1;A0A087X1X7;E9PK06;E9PQ49;E9PL71	EF1D_HUMAN	EEF1D	Elongation factor 1-delta	1	ATAPQTQHVSPMR	ATAPQTQHVS(UniMod:21)PMR	3	ATAPQTQHVS(UniMod:21)PMR3	3.2094e+06	3.49229e+06	3.65935e+06
P29692	P29692;E9PI39;E9PRY8;E9PPR1;E9PK01;E9PL12;E9PQZ1;A0A087X1X7;E9PK06;E9PQ49;E9PL71	EF1D_HUMAN	EEF1D	Elongation factor 1-delta	1	ATAPQTQHVSPMRQVEPPAK	ATAPQTQHVS(UniMod:21)PMRQVEPPAK	3	ATAPQTQHVS(UniMod:21)PMRQVEPPAK3	2.88785e+06	2.6496e+06	2.53134e+06
Q8WWI1	Q8WWI1;H0YDG6;E9PMS6;E9PMT2;F8WD26;A0A0A0MTE2;J3KP06;E9PMP7;H0Y424	LMO7_HUMAN	LMO7	LIM domain only protein 7	1	ATLSSTSGLDLMSESGEGEISPQR	ATLSSTSGLDLMSESGEGEIS(UniMod:21)PQR	3	ATLSSTSGLDLMSESGEGEIS(UniMod:21)PQR3		224616	282667
Q8WWI1	Q8WWI1;H0YDG6;E9PMS6;E9PMT2;F8WD26;A0A0A0MTE2;J3KP06;E9PMP7;H0Y424	LMO7_HUMAN	LMO7	LIM domain only protein 7	1	ATLSSTSGLDLMSESGEGEISPQREVSR	ATLSSTSGLDLMSESGEGEIS(UniMod:21)PQREVSR	3	ATLSSTSGLDLMSESGEGEIS(UniMod:21)PQREVSR3	1.45689e+06	1.24944e+06	1.1037e+06
O76021	O76021;J3QSV6	RL1D1_HUMAN	RSL1D1	Ribosomal L1 domain-containing protein 1	1	ATNESEDEIPQLVPIGK	ATNES(UniMod:21)EDEIPQLVPIGK	3	ATNES(UniMod:21)EDEIPQLVPIGK3	94804.2	197892	90889.7
O76021	O76021;J3QSV6	RL1D1_HUMAN	RSL1D1	Ribosomal L1 domain-containing protein 1	1	ATNESEDEIPQLVPIGKK	ATNES(UniMod:21)EDEIPQLVPIGKK	3	ATNES(UniMod:21)EDEIPQLVPIGKK3	314621	286739	184250
Q86U86	Q86U86;E7EVG2;C9J053;C9JQF1;C9JCJ2;C9J409;C9JPI5	PB1_HUMAN	PBRM1	Protein polybromo-1	1	ATSPSSSVSGDFDDGHHSVSTPGPSR	ATS(UniMod:21)PSSSVSGDFDDGHHSVSTPGPSR	3	ATS(UniMod:21)PSSSVSGDFDDGHHSVSTPGPSR3	87748.5
Q9H1E3	Q9H1E3	NUCKS_HUMAN	NUCKS1	Nuclear ubiquitous casein and cyclin-dependent kinase substrate 1	1	ATVTPSPVK	ATVT(UniMod:21)PS(UniMod:21)PVK	2	ATVT(UniMod:21)PS(UniMod:21)PVK2	3.04863e+06	2.76116e+06	2.44511e+06
Q9H1E3	Q9H1E3	NUCKS_HUMAN	NUCKS1	Nuclear ubiquitous casein and cyclin-dependent kinase substrate 1	1	ATVTPSPVK	ATVTPS(UniMod:21)PVK	2	ATVTPS(UniMod:21)PVK2	1.09017e+07	1.01762e+07	8.50056e+06
Q8NEF9	Q8NEF9	SRFB1_HUMAN	SRFBP1	Serum response factor-binding protein 1	1	AVTIANSPSK	AVTIANSPS(UniMod:21)K	2	AVTIANSPS(UniMod:21)K2	88928.1	96534.9	48171.5
P51610	P51610;H7C1C4	HCFC1_HUMAN	HCFC1	Host cell factor 1	1	AVTTVTQSTPVPGPSVPPPEELQVSPGPR	AVTTVTQSTPVPGPSVPPPEELQVS(UniMod:21)PGPR	3	AVTTVTQSTPVPGPSVPPPEELQVS(UniMod:21)PGPR3	751128	720440	705271
Q9UK32	P51812;Q9UK32;Q15418;B1AXG1;E9PGT3;B4DG22;B7ZB17	KS6A6_HUMAN	RPS6KA6	Ribosomal protein S6 kinase alpha-6	0	AYSFCGTVEYMAPEVVNR	AYSFC(UniMod:4)GTVEY(UniMod:21)MAPEVVNR	3	AYSFC(UniMod:4)GTVEY(UniMod:21)MAPEVVNR3	197430	237564	272705
P02765	P02765	FETUA_HUMAN	AHSG	Alpha-2-HS-glycoprotein	1	CDSSPDSAEDVRK	C(UniMod:4)DSSPDS(UniMod:21)AEDVRK	2	C(UniMod:4)DSSPDS(UniMod:21)AEDVRK2	346377	245685	212608
P21333	P21333;Q60FE5	FLNA_HUMAN	FLNA	Filamin-A	1	CSGPGLSPGMVR	C(UniMod:4)SGPGLS(UniMod:21)PGMVR	2	C(UniMod:4)SGPGLS(UniMod:21)PGMVR2	1.47375e+06	1.46623e+06	1.39997e+06
P53621	P53621;A0A3B3IU89;A0A3B3ITV3;A0A3B3ISK1;A0A3B3ISC6;A0A3B3IT15;A0A3B3IS84	COPA_HUMAN	COPA	Coatomer subunit alpha	1	DADSQNPDAPEGK	DADS(UniMod:21)QNPDAPEGK	2	DADS(UniMod:21)QNPDAPEGK2	111733	113501	141822
Q9BVG9	Q9BVG9;E9PS47;E9PLE4	PTSS2_HUMAN	PTDSS2	Phosphatidylserine synthase 2	1	DAGGPRPESPVPAGR	DAGGPRPES(UniMod:21)PVPAGR	2	DAGGPRPES(UniMod:21)PVPAGR2	282157	254701	255396
P49792	P49792;Q99666;O14715;A6NKT7;Q7Z3J3;J3KQ37;J3KNE0	RBP2_HUMAN	RANBP2	E3 SUMO-protein ligase RanBP2	0	DDDAYKTEDSDDIHFEPVVQMPEK	DDDAYKTEDS(UniMod:21)DDIHFEPVVQMPEK	3	DDDAYKTEDS(UniMod:21)DDIHFEPVVQMPEK3	178342	193702	239507
P24534	P24534;C9JZW3	EF1B_HUMAN	EEF1B2	Elongation factor 1-beta	1	DDDDIDLFGSDDEEESEEAK	DDDDIDLFGS(UniMod:21)DDEEESEEAK	3	DDDDIDLFGS(UniMod:21)DDEEESEEAK3	68113.3	65898.7	66835.2
P24534	P24534;C9JZW3	EF1B_HUMAN	EEF1B2	Elongation factor 1-beta	1	DDDDIDLFGSDDEEESEEAKR	DDDDIDLFGS(UniMod:21)DDEEESEEAKR	3	DDDDIDLFGS(UniMod:21)DDEEESEEAKR3	1.00664e+06		959762
O94874	O94874	UFL1_HUMAN	UFL1	E3 UFM1-protein ligase 1	1	DDDSDDESQSSHTGK	DDDS(UniMod:21)DDESQSSHTGK	2	DDDS(UniMod:21)DDESQSSHTGK2	190596	229129	191171
Q9H1E3	Q9H1E3	NUCKS_HUMAN	NUCKS1	Nuclear ubiquitous casein and cyclin-dependent kinase substrate 1	1	DDSHSAEDSEDEK	DDSHS(UniMod:21)AEDS(UniMod:21)EDEK	2	DDSHS(UniMod:21)AEDS(UniMod:21)EDEK2	1.7753e+06	1.53305e+06	1.36053e+06
Q9H1E3	Q9H1E3	NUCKS_HUMAN	NUCKS1	Nuclear ubiquitous casein and cyclin-dependent kinase substrate 1	1	DDSHSAEDSEDEKEDHK	DDSHS(UniMod:21)AEDS(UniMod:21)EDEKEDHK	3	DDSHS(UniMod:21)AEDS(UniMod:21)EDEKEDHK3	311566	451632	377930
Q9H1E3	Q9H1E3	NUCKS_HUMAN	NUCKS1	Nuclear ubiquitous casein and cyclin-dependent kinase substrate 1	1	DDSHSAEDSEDEK	DDSHSAEDS(UniMod:21)EDEK	2	DDSHSAEDS(UniMod:21)EDEK2	478676	477833	349595
P06748	P06748;A0A7I2V579;A0A7I2V433;A0A7I2V4G8;A0A7I2V2X9;A0A7I2YQC0;A0A7I2V3U2;A0A7I2V5S2;A0A7I2V3G5	NPM_HUMAN	NPM1	Nucleophosmin	1	DELHIVEAEAMNYEGSPIK	DELHIVEAEAMNYEGS(UniMod:21)PIK	3	DELHIVEAEAMNYEGS(UniMod:21)PIK3	1.68592e+07	1.85923e+07	1.69983e+07
A0A494BZV2	Q6WCQ1;A0A494BZV2;A0A1W2PPU9	A0A494BZV2_HUMAN	MPRIP	Myosin phosphatase Rho-interacting protein	1	DFTNEAPPAPLPDASASPLSPHRR	DFTNEAPPAPLPDASASPLS(UniMod:21)PHRR	3	DFTNEAPPAPLPDASASPLS(UniMod:21)PHRR3	278139
P25205	P25205;J3KQ69;Q7Z6P5;A0A499FHX9	MCM3_HUMAN	MCM3	DNA replication licensing factor MCM3	1	DGDSYDPYDFSDTEEEMPQVHTPK	DGDSYDPYDFS(UniMod:21)DTEEEMPQVHT(UniMod:21)PK	3	DGDSYDPYDFS(UniMod:21)DTEEEMPQVHT(UniMod:21)PK3	2.0855e+06	2.0775e+06	2.06693e+06
P25205	P25205;J3KQ69;Q7Z6P5;A0A499FHX9	MCM3_HUMAN	MCM3	DNA replication licensing factor MCM3	1	DGDSYDPYDFSDTEEEMPQVHTPK	DGDSYDPYDFS(UniMod:21)DTEEEMPQVHTPK	3	DGDSYDPYDFS(UniMod:21)DTEEEMPQVHTPK3	1.28644e+06	1.39788e+06	1.22348e+06
Q9NWH9	Q9NWH9;H0YL55;H7BXE3	SLTM_HUMAN	SLTM	SAFB-like transcription modulator	1	DGQDAIAQSPEK	DGQDAIAQS(UniMod:21)PEK	2	DGQDAIAQS(UniMod:21)PEK2	2.33103e+06	2.31708e+06	2.19443e+06
Q9Y490	Q9Y490	TLN1_HUMAN	TLN1	Talin-1	1	DHFGLEGDEESTMLEDSVSPKK	DHFGLEGDEESTMLEDSVS(UniMod:21)PKK	3	DHFGLEGDEESTMLEDSVS(UniMod:21)PKK3	719113	581452	532781
Q9Y3B9	Q9Y3B9	RRP15_HUMAN	RRP15	RRP15-like protein	1	DHFYSDDDAIEADSEGDAEPCDK	DHFYS(UniMod:21)DDDAIEADS(UniMod:21)EGDAEPC(UniMod:4)DK	3	DHFYS(UniMod:21)DDDAIEADS(UniMod:21)EGDAEPC(UniMod:4)DK3	663828	684062	540079
P25490	P25490;H0YJV7;A0A494C032;H0YJU4	TYY1_HUMAN	YY1	Transcriptional repressor protein YY1	1	DIDHETVVEEQIIGENSPPDYSEYMTGK	DIDHETVVEEQIIGENS(UniMod:21)PPDYSEYMTGK	3	DIDHETVVEEQIIGENS(UniMod:21)PPDYSEYMTGK3	1.07614e+06	1.20971e+06	1.18945e+06
Q09666	Q09666	AHNK_HUMAN	AHNAK	Neuroblast differentiation-associated protein AHNAK	1	DIDISSPEFK	DIDISS(UniMod:21)PEFK	2	DIDISS(UniMod:21)PEFK2	3.06704e+06	3.50918e+06	2.86732e+06
Q96GX9	Q96GX9;S4R3D6	MTNB_HUMAN	APIP	Methylthioribulose-1-phosphate dehydratase	1	DISGPSPSK	DISGPS(UniMod:21)PSK	2	DISGPS(UniMod:21)PSK2	746592	794536	744771
O43719	O43719	HTSF1_HUMAN	HTATSF1	HIV Tat-specific factor 1	1	DLDEEGSEK	DLDEEGS(UniMod:21)EK	2	DLDEEGS(UniMod:21)EK2	2.90477e+06	2.46841e+06	2.43271e+06
Q9Y3T9	Q9Y3T9	NOC2L_HUMAN	NOC2L	Nucleolar complex protein 2 homolog	1	DLFDLNSSEEDDTEGFSER	DLFDLNS(UniMod:21)S(UniMod:21)EEDDTEGFSER	3	DLFDLNS(UniMod:21)S(UniMod:21)EEDDTEGFSER3	48837.1	61230.8	39763.7
Q9NYF8	Q9NYF8;A0A1W2PQ43;E9PK91;E9PK09;E9PKI6;E9PQN2	BCLF1_HUMAN	BCLAF1	Bcl-2-associated transcription factor 1	1	DLFDYSPPLHK	DLFDYS(UniMod:21)PPLHK	2	DLFDYS(UniMod:21)PPLHK2	2.21414e+06	2.18247e+06	2.10311e+06
O60763	O60763	USO1_HUMAN	USO1	General vesicular transport factor p115	1	DLGHPVEEEDELESGDQEDEDDESEDPGK	DLGHPVEEEDELES(UniMod:21)GDQEDEDDESEDPGK	3	DLGHPVEEEDELES(UniMod:21)GDQEDEDDESEDPGK3	2.44044e+06	2.48164e+06	2.14687e+06
P42677	P42677	RS27_HUMAN	RPS27	40S ribosomal protein S27	1	DLLHPSPEEEK	DLLHPS(UniMod:21)PEEEK	2	DLLHPS(UniMod:21)PEEEK2	391978	499021	356818
Q13541	Q13541	4EBP1_HUMAN	EIF4EBP1	Eukaryotic translation initiation factor 4E-binding protein 1	1	DLPTIPGVTSPSSDEPPMEASQSHLR	DLPTIPGVTS(UniMod:21)PSSDEPPMEASQSHLR	3	DLPTIPGVTS(UniMod:21)PSSDEPPMEASQSHLR3	211830	283828	277581
Q53LP3	Q53LP3	SWAHC_HUMAN	SOWAHC	Ankyrin repeat domain-containing protein SOWAHC	1	DLVMGSSPQLK	DLVMGSS(UniMod:21)PQLK	2	DLVMGSS(UniMod:21)PQLK2	131281	166898	118269
G3V4R5	Q6PJT7;H0YJA2;G3V4R5;G3V411	G3V4R5_HUMAN	ZC3H14	Zinc finger CCCH domain-containing protein 14 (Fragment)	1	DLVQPDKPASPK	DLVQPDKPAS(UniMod:21)PK	2	DLVQPDKPAS(UniMod:21)PK2	1.24064e+06	1.21634e+06	1.13153e+06
P27816	P27816;A0A804HKE7;E7EVA0	MAP4_HUMAN	MAP4	Microtubule-associated protein 4	1	DMSPLSETEMALGK	DMS(UniMod:21)PLSETEMALGK	2	DMS(UniMod:21)PLSETEMALGK2	685442	548744	558532
Q5SW79	Q5SW79;H0YB66;H0Y2V6	CE170_HUMAN	CEP170	Centrosomal protein of 170 kDa	1	DNDDDQSDKGTYTIELENPNSEEVEAR	DNDDDQS(UniMod:21)DKGTY(UniMod:21)TIELENPNSEEVEAR	3	DNDDDQS(UniMod:21)DKGTY(UniMod:21)TIELENPNSEEVEAR3	325010	304658	326688
Q9BQG0	Q9BQG0	MBB1A_HUMAN	MYBBP1A	Myb-binding protein 1A	1	DPAQPMSPGEATQSGAR	DPAQPMS(UniMod:21)PGEATQSGAR	2	DPAQPMS(UniMod:21)PGEATQSGAR2	108675	80185.2	94859.4
Q12888	Q12888;A6NNK5	TP53B_HUMAN	TP53BP1	TP53-binding protein 1	1	DPVSPASQK	DPVS(UniMod:21)PASQK	2	DPVS(UniMod:21)PASQK2	278885	192520	265080
A0A4W8VX11;A0A5H1ZRS1	A0A4W8VX11;E9PGW9;E7EV93;A0A5H1ZRS1	A0A4W8VX11_HUMAN;A0A5H1ZRS1_HUMAN	PCM1	Pericentriolar material 1 protein	1	DQHLNNSSSSPQR	DQHLNNS(UniMod:21)SSSPQR	2	DQHLNNS(UniMod:21)SSSPQR2	31502.2	83576.2	51426.4
Q9NXG2	Q9NXG2;H3BNW0	THUM1_HUMAN	THUMPD1	THUMP domain-containing protein 1	1	DQQPSGSEGEDDDAEAALKK	DQQPS(UniMod:21)GS(UniMod:21)EGEDDDAEAALKK	3	DQQPS(UniMod:21)GS(UniMod:21)EGEDDDAEAALKK3	1.46236e+06	1.37092e+06	1.46946e+06
Q5T200	Q5T200;A0A7I2V4I5	ZC3HD_HUMAN	ZC3H13	Zinc finger CCCH domain-containing protein 13	1	DQRPSSPIR	DQRPSS(UniMod:21)PIR	2	DQRPSS(UniMod:21)PIR2	305736		366660
Q9P206	Q9P206	K1522_HUMAN	KIAA1522	Uncharacterized protein KIAA1522	1	DQSPPPSPPPSYHPPPPPTK	DQS(UniMod:21)PPPS(UniMod:21)PPPSYHPPPPPTK	3	DQS(UniMod:21)PPPS(UniMod:21)PPPSYHPPPPPTK3	489799	504500	446062
Q5JTV8	Q5JTV8;H0YDU3;A0A0A0MSK5;J3KN66	TOIP1_HUMAN	TOR1AIP1	Torsin-1A-interacting protein 1	1	DSHSSEEDEASSQTDLSQTISK	DS(UniMod:21)HS(UniMod:21)SEEDEASSQTDLSQTISK	3	DS(UniMod:21)HS(UniMod:21)SEEDEASSQTDLSQTISK3	377852	436311	348746
P51532	P51532;A0A2R8Y4C5;A0A2R8YG32;A0A2R8Y6V2;A0A2R8YDA1;K7EQF0;A0A2R8YF58;K7EP28;A0A2R8YFK5;A0A2R8Y440;A0A2R8Y5K3;Q9HBD4;A0A2R8Y526;A0A2R8Y7F3;A0A2R8Y4P4;A0A2R8Y6N0;A0A2R8YF80;A0A2R8Y7Y7;A0A2R8Y7S2;A0A2R8YGG3;A0A2R8Y523	SMCA4_HUMAN	SMARCA4	Transcription activator BRG1	1	DSDAGSSTPTTSTR	DSDAGSS(UniMod:21)TPTTSTR	2	DSDAGSS(UniMod:21)TPTTSTR2	37522	43113.4	79720
Q2TAM9	Q2TAM9	TUSC1_HUMAN	TUSC1	Tumor suppressor candidate gene 1 protein	1	DSGREDEPGSPR	DSGREDEPGS(UniMod:21)PR	2	DSGREDEPGS(UniMod:21)PR2		293487	289728
Q12906	Q12906	ILF3_HUMAN	ILF3	Interleukin enhancer-binding factor 3	1	DSSKGEDSAEETEAK	DSSKGEDS(UniMod:21)AEETEAK	2	DSSKGEDS(UniMod:21)AEETEAK2	6.42266e+06	6.93354e+06	6.33421e+06
Q9UPQ0	Q9UPQ0;D6RD46;G5EA03;D6RGH8;E9PDJ9;E7EPK0;D6RJ93;D6R8Y0;Q6NVB9	LIMC1_HUMAN	LIMCH1	LIM and calponin homology domains-containing protein 1	1	DTDDIESPKR	DTDDIES(UniMod:21)PKR	2	DTDDIES(UniMod:21)PKR2	296743	171986	238563
Q86WB0	Q86WB0;F8WAU5;C9J0I9	ZC3C1_HUMAN	ZC3HC1	Zinc finger C3HC-type protein 1	1	DTSATSQSVNGSPQAEQPSLESTSK	DTSATSQS(UniMod:21)VNGSPQAEQPSLESTSK	3	DTSATSQS(UniMod:21)VNGSPQAEQPSLESTSK3	114389		141904
P43243	A0A0R4J2E8;P43243;D6REM6;A8MXP9;B3KM87	MATR3_HUMAN	MATR3	Matrin-3	1	DTSENADGQSDENK	DTSENADGQS(UniMod:21)DENK	2	DTSENADGQS(UniMod:21)DENK2	284264	259528	256436
P43243	A0A0R4J2E8;P43243;D6REM6;A8MXP9;B3KM87	MATR3_HUMAN	MATR3	Matrin-3	1	DTSENADGQSDENKDDYTIPDEYR	DTSENADGQS(UniMod:21)DENKDDYTIPDEYR	3	DTSENADGQS(UniMod:21)DENKDDYTIPDEYR3	1.91127e+06	1.98015e+06	1.75662e+06
P46821	P46821	MAP1B_HUMAN	MAP1B	Microtubule-associated protein 1B	1	DVMSDETNNEETESPSQEFVNITK	DVMSDETNNEETES(UniMod:21)PSQEFVNITK	3	DVMSDETNNEETES(UniMod:21)PSQEFVNITK3	686197	663864	588881
P27816	P27816;A0A804HKE7;E7EVA0	MAP4_HUMAN	MAP4	Microtubule-associated protein 4	1	DVTPPPETEVVLIK	DVT(UniMod:21)PPPETEVVLIK	2	DVT(UniMod:21)PPPETEVVLIK2	3.17518e+06	3.76579e+06	3.33089e+06
P38159;Q96E39	P38159;Q96E39;H0Y6E7;H3BT71;H3BUY5	RBMX_HUMAN;RMXL1_HUMAN	RBMX;RBMXL1	RNA-binding motif protein, X chromosome	0	DVYLSPRDDGYSTK	DVY(UniMod:21)LSPRDDGYSTK	2	DVY(UniMod:21)LSPRDDGYSTK2	4.82192e+06	5.64846e+06	4.94539e+06
Q05519	Q05519;Q5T757;Q5T760	SRS11_HUMAN	SRSF11	Serine/arginine-rich splicing factor 11	1	DYDEEEQGYDSEK	DYDEEEQGYDS(UniMod:21)EK	2	DYDEEEQGYDS(UniMod:21)EK2	408960	402658	383124
Q7Z417	Q7Z417	NUFP2_HUMAN	NUFIP2	Nuclear fragile X mental retardation-interacting protein 2	1	DYEIESQNPLASPTNTLLGSAK	DYEIESQNPLAS(UniMod:21)PTNTLLGSAK	3	DYEIESQNPLAS(UniMod:21)PTNTLLGSAK3	397838	339076	380050
Q96C57	Q96C57;F5H8B7;G5EA44;F5H3K2;E7ENF1;F5H7W8	CSTOS_HUMAN	CUSTOS	Protein CUSTOS	0	EAAVSASDILQESAIHSPGTVEK	EAAVSASDILQESAIHSPGT(UniMod:21)VEK	3	EAAVSASDILQESAIHSPGT(UniMod:21)VEK3	373219	348405	344345
Q96ST2	Q96ST2	IWS1_HUMAN	IWS1	Protein IWS1 homolog	1	EAEDSDSDDNIKR	EAEDS(UniMod:21)DS(UniMod:21)DDNIKR	2	EAEDS(UniMod:21)DS(UniMod:21)DDNIKR2	492474		385548
P55010	P55010	IF5_HUMAN	EIF5	Eukaryotic translation initiation factor 5	1	EAEEESSGGEEEDEDENIEVVYSK	EAEEES(UniMod:21)S(UniMod:21)GGEEEDEDENIEVVYSK	3	EAEEES(UniMod:21)S(UniMod:21)GGEEEDEDENIEVVYSK3	816913	1.03098e+06	777803
P07910	P07910;G3V2D6;G3V4C1;G3V2Q1	HNRPC_HUMAN	HNRNPC	Heterogeneous nuclear ribonucleoproteins C1/C2	1	EAEEGEDDRDSANGEDDS	EAEEGEDDRDS(UniMod:21)ANGEDDS	2	EAEEGEDDRDS(UniMod:21)ANGEDDS2	3.49489e+07	3.18997e+07	3.16586e+07
Q3KQU3	Q3KQU3;D3DPS3	MA7D1_HUMAN	MAP7D1	MAP7 domain-containing protein 1	1	EANANGSSPEPVK	EANANGSS(UniMod:21)PEPVK	2	EANANGSS(UniMod:21)PEPVK2	83148.6	124448
Q8IYB3	Q8IYB3;M0R088;A9Z1X7	SRRM1_HUMAN	SRRM1	Serine/arginine repetitive matrix protein 1	1	EARSPQPNK	EARS(UniMod:21)PQPNK	2	EARS(UniMod:21)PQPNK2	221196	653034	117636
O75674	O75674;I3NI44;J3KQU4;I3L4I4	TM1L1_HUMAN	TOM1L1	TOM1-like protein 1	1	EATNTTSEPSAPSQDLLDLSPSPR	EATNTTSEPSAPSQDLLDLSPS(UniMod:21)PR	3	EATNTTSEPSAPSQDLLDLSPS(UniMod:21)PR3	420813	492388	445089
Q8N556	Q8N556	AFAP1_HUMAN	AFAP1	Actin filament-associated protein 1	1	EAYSGCSGPVDSECPPPPSSPVHK	EAYSGC(UniMod:4)SGPVDSEC(UniMod:4)PPPPSS(UniMod:21)PVHK	3	EAYSGC(UniMod:4)SGPVDSEC(UniMod:4)PPPPSS(UniMod:21)PVHK3	559067	517218	475740
Q7Z569	Q7Z569;J3KNN7	BRAP_HUMAN	BRAP	BRCA1-associated protein	1	ECINAAPDSPSK	EC(UniMod:4)INAAPDSPS(UniMod:21)K	2	EC(UniMod:4)INAAPDSPS(UniMod:21)K2	270688	287622	239114
Q9NQC3	Q9NQC3	RTN4_HUMAN	RTN4	Reticulon-4	1	EDLDQSPLVSSSDSPPRPQPAFK	EDLDQSPLVS(UniMod:21)S(UniMod:21)SDS(UniMod:21)PPRPQPAFK	3	EDLDQSPLVS(UniMod:21)S(UniMod:21)SDS(UniMod:21)PPRPQPAFK3	465241	388228	470545
O75643	O75643;A0A494C1A5	U520_HUMAN	SNRNP200	U5 small nuclear ribonucleoprotein 200 kDa helicase	1	EEASDDDMEGDEAVVR	EEAS(UniMod:21)DDDMEGDEAVVR	2	EEAS(UniMod:21)DDDMEGDEAVVR2	149857	196353	179159
Q9H1E3	Q9H1E3	NUCKS_HUMAN	NUCKS1	Nuclear ubiquitous casein and cyclin-dependent kinase substrate 1	1	EEDEEPESPPEK	EEDEEPES(UniMod:21)PPEK	2	EEDEEPES(UniMod:21)PPEK2	6.78699e+06	6.33298e+06	5.76491e+06
Q9H1E3	Q9H1E3	NUCKS_HUMAN	NUCKS1	Nuclear ubiquitous casein and cyclin-dependent kinase substrate 1	1	EEDEEPESPPEKK	EEDEEPES(UniMod:21)PPEKK	2	EEDEEPES(UniMod:21)PPEKK2	439743	311338	316193
P17096	P17096	HMGA1_HUMAN	HMGA1	High mobility group protein HMG-I/HMG-Y	1	EEEEGISQESSEEEQ	EEEEGISQES(UniMod:21)S(UniMod:21)EEEQ	2	EEEEGISQES(UniMod:21)S(UniMod:21)EEEQ2	8.44695e+06	7.80788e+06	7.10097e+06
P17096	P17096	HMGA1_HUMAN	HMGA1	High mobility group protein HMG-I/HMG-Y	1	EEEEGISQESSEEEQ	EEEEGISQESS(UniMod:21)EEEQ	2	EEEEGISQESS(UniMod:21)EEEQ2	1.79265e+06	1.30729e+06	1.53196e+06
Q8N1G4	Q8N1G4	LRC47_HUMAN	LRRC47	Leucine-rich repeat-containing protein 47	1	EEGSLSDTEADAVSGQLPDPTTNPSAGK	EEGSLSDT(UniMod:21)EADAVSGQLPDPTTNPSAGK	3	EEGSLSDT(UniMod:21)EADAVSGQLPDPTTNPSAGK3	1.3048e+06	1.42456e+06	1.24594e+06
P26368	P26368	U2AF2_HUMAN	U2AF2	Splicing factor U2AF 65 kDa subunit	1	EEHGGLIRSPR	EEHGGLIRS(UniMod:21)PR	3	EEHGGLIRS(UniMod:21)PR3		2.65158e+06
Q99442	Q99442	SEC62_HUMAN	SEC62	Translocation protein SEC62	1	EELEQQTDGDCEEDEEEENDGETPK	EELEQQT(UniMod:21)DGDC(UniMod:4)EEDEEEENDGETPK	3	EELEQQT(UniMod:21)DGDC(UniMod:4)EEDEEEENDGETPK3	1.74903e+06	1.61139e+06	1.73152e+06
O00567	O00567	NOP56_HUMAN	NOP56	Nucleolar protein 56	1	EELMSSDLEETAGSTSIPK	EELMSS(UniMod:21)DLEETAGSTSIPK	3	EELMSS(UniMod:21)DLEETAGSTSIPK3	1.31532e+06	1.40363e+06	1.28423e+06
Q13309	Q13309;D6RHY6;A0A7I2V2J7;A0A7I2YQC7;A0A7I2V5B8;A0A7P0S4R7;D6R9R7;A0A7I2YQH6;A0A0A0MTL5;D6RAG5;A0A7I2V3U1;D6RF40	SKP2_HUMAN	SKP2	S-phase kinase-associated protein 2	1	EEPDSENIPQELLSNLGHPESPPR	EEPDSENIPQELLSNLGHPES(UniMod:21)PPR	3	EEPDSENIPQELLSNLGHPES(UniMod:21)PPR3	1.18827e+06	1.3155e+06	1.24172e+06
Q13309	Q13309;D6RHY6;A0A7I2V2J7;A0A7I2YQC7;A0A7I2V5B8;A0A7P0S4R7;D6R9R7;A0A7I2YQH6;A0A0A0MTL5;D6RAG5;A0A7I2V3U1;D6RF40	SKP2_HUMAN	SKP2	S-phase kinase-associated protein 2	1	EEPDSENIPQELLSNLGHPESPPRK	EEPDSENIPQELLSNLGHPES(UniMod:21)PPRK	3	EEPDSENIPQELLSNLGHPES(UniMod:21)PPRK3	165129		423934
Q9NR30	Q9NR30;A0A8I5KND9;A0A8I5KYZ4;A0A8I5KNN2;A0A8I5KNP3	DDX21_HUMAN	DDX21	Nucleolar RNA helicase 2	1	EEPSQNDISPK	EEPSQNDIS(UniMod:21)PK	2	EEPSQNDIS(UniMod:21)PK2	394006	560888	472733
Q99733	Q99733;C9J6D1;C9JZI7;E9PS34;E9PKT8;E9PNJ7;A8MXH2	NP1L4_HUMAN	NAP1L4	Nucleosome assembly protein 1-like 4	1	EFITGDVEPTDAESEWHSENEEEEK	EFITGDVEPTDAESEWHS(UniMod:21)ENEEEEK	3	EFITGDVEPTDAESEWHS(UniMod:21)ENEEEEK3	71291.9	56489.8
O00264	O00264	PGRC1_HUMAN	PGRMC1	Membrane-associated progesterone receptor component 1	1	EGEEPTVYSDEEEPK	EGEEPTVYS(UniMod:21)DEEEPK	2	EGEEPTVYS(UniMod:21)DEEEPK2	751911	684956	506212
P78332	P78332;F8WCA5;E9PGM9	RBM6_HUMAN	RBM6	RNA-binding protein 6	1	EGETQGVAFEHESPADFQNSQSPVQDQDK	EGETQGVAFEHESPADFQNS(UniMod:21)QSPVQDQDK	3	EGETQGVAFEHESPADFQNS(UniMod:21)QSPVQDQDK3		563062
P78332	P78332;F8WCA5;E9PGM9	RBM6_HUMAN	RBM6	RNA-binding protein 6	1	EGETQGVAFEHESPADFQNSQSPVQDQDK	EGETQGVAFEHESPADFQNSQS(UniMod:21)PVQDQDK	3	EGETQGVAFEHESPADFQNSQS(UniMod:21)PVQDQDK3	566659		528217
O00470	O00470;H0YNY8;U3KPR8;E9PDC4;F5GYS8	MEIS1_HUMAN	MEIS1	Homeobox protein Meis1	1	EGGSKSDSEDITR	EGGSKS(UniMod:21)DSEDITR	2	EGGSKS(UniMod:21)DSEDITR2	237369	223461	215253
Q9UHB6	Q9UHB6;F8VS07;F8VQE1	LIMA1_HUMAN	LIMA1	LIM domain and actin-binding protein 1	1	EGHSLEMENENLVENGADSDEDDNSFLK	EGHSLEMENENLVENGADS(UniMod:21)DEDDNSFLK	3	EGHSLEMENENLVENGADS(UniMod:21)DEDDNSFLK3	5.16149e+06	6.07143e+06	5.6396e+06
P41743	P41743	KPCI_HUMAN	PRKCI	Protein kinase C iota type	1	EGLRPGDTTSTFCGTPNYIAPEILR	EGLRPGDTTST(UniMod:21)FC(UniMod:4)GTPNYIAPEILR	3	EGLRPGDTTST(UniMod:21)FC(UniMod:4)GTPNYIAPEILR3	1.07455e+06	1.28015e+06	1.13212e+06
Q08945	Q08945;A0A0U1RRK2	SSRP1_HUMAN	SSRP1	FACT complex subunit SSRP1	1	EGMNPSYDEYADSDEDQHDAYLER	EGMNPSYDEYADS(UniMod:21)DEDQHDAYLER	3	EGMNPSYDEYADS(UniMod:21)DEDQHDAYLER3	1.99901e+06	3.98197e+06	4.22187e+06
O75351	O75351;K7EKZ3;K7EL71	VPS4B_HUMAN	VPS4B	Vacuolar protein sorting-associated protein 4B	1	EGQPSPADEK	EGQPS(UniMod:21)PADEK	2	EGQPS(UniMod:21)PADEK2	12148.2
P85037	P85037	FOXK1_HUMAN	FOXK1	Forkhead box protein K1	1	EGSPIPHDPEFGSK	EGS(UniMod:21)PIPHDPEFGSK	2	EGS(UniMod:21)PIPHDPEFGSK2	520378	622281	529218
Q15651	Q15651;A0A087WZE9	HMGN3_HUMAN	HMGN3	High mobility group nucleosome-binding domain-containing protein 3	1	EGTAPSENGETK	EGTAPS(UniMod:21)ENGETK	2	EGTAPS(UniMod:21)ENGETK2	417141	339610	342079
Q16643	Q16643	DREB_HUMAN	DBN1	Drebrin	1	EGTQASEGYFSQSQEEEFAQSEELCAK	EGTQASEGY(UniMod:21)FSQSQEEEFAQSEELC(UniMod:4)AK	3	EGTQASEGY(UniMod:21)FSQSQEEEFAQSEELC(UniMod:4)AK3	61330.5	128997	39046.5
Q9H307	Q9H307	PININ_HUMAN	PNN	Pinin	1	EIAIVHSDAEK	EIAIVHS(UniMod:21)DAEK	2	EIAIVHS(UniMod:21)DAEK2	3.83012e+06	3.97839e+06	3.85692e+06
Q9BQG0	Q9BQG0;I3L1L3	MBB1A_HUMAN	MYBBP1A	Myb-binding protein 1A	1	EIPSATQSPISK	EIPSATQS(UniMod:21)PISK	2	EIPSATQS(UniMod:21)PISK2	1.20449e+06	1.17573e+06	974263
P08238	P08238;Q58FF7	HS90B_HUMAN	HSP90AB1	Heat shock protein HSP 90-beta	0	EISDDEAEEEK	EIS(UniMod:21)DDEAEEEK	2	EIS(UniMod:21)DDEAEEEK2	1.1007e+08	1.13965e+08	1.11374e+08
P08238	P08238;Q58FF7	HS90B_HUMAN	HSP90AB1	Heat shock protein HSP 90-beta	0	EISDDEAEEEKGEK	EIS(UniMod:21)DDEAEEEKGEK	2	EIS(UniMod:21)DDEAEEEKGEK2	579800	686437	611072
Q96C57	Q96C57;F5H8B7;G5EA44;F5H3K2;E7ENF1;F5H7W8	CSTOS_HUMAN	CUSTOS	Protein CUSTOS	0	EKEESPQPR	EKEES(UniMod:21)PQPR	2	EKEES(UniMod:21)PQPR2	324037	406850	419900
P08238	P08238	HS90B_HUMAN	HSP90AB1	Heat shock protein HSP 90-beta	1	EKEISDDEAEEEK	EKEIS(UniMod:21)DDEAEEEK	2	EKEIS(UniMod:21)DDEAEEEK2	1.08235e+07	1.02121e+07	9.65839e+06
Q9H4A3	Q9H4A3;A0A6Q8PFM0;F5GWT4	WNK1_HUMAN	WNK1	Serine/threonine-protein kinase WNK1	1	EKPELSEPSHLNGPSSDPEAAFLSR	EKPELSEPSHLNGPSS(UniMod:21)DPEAAFLSR	3	EKPELSEPSHLNGPSS(UniMod:21)DPEAAFLSR3	1.84166e+06	2.23399e+06	1.93932e+06
O76021	O76021	RL1D1_HUMAN	RSL1D1	Ribosomal L1 domain-containing protein 1	1	EKSPSLGK	EKS(UniMod:21)PSLGK	2	EKS(UniMod:21)PSLGK2	259858	272637	229004
O15541	O15541	R113A_HUMAN	RNF113A	E3 ubiquitin-protein ligase RNF113A	1	ELDEGRYGVYEDENYEVGSDDEEIPFK	ELDEGRYGVYEDENYEVGS(UniMod:21)DDEEIPFK	3	ELDEGRYGVYEDENYEVGS(UniMod:21)DDEEIPFK3	413544	588141	516622
Q9UKV3	Q9UKV3;E7EQT4;S4R3H4	ACINU_HUMAN	ACIN1	Apoptotic chromatin condensation inducer in the nucleus	1	ELLVSQHTVQLVGGLSPLSSPSDTK	ELLVSQHTVQLVGGLS(UniMod:21)PLSSPSDTK	3	ELLVSQHTVQLVGGLS(UniMod:21)PLSSPSDTK3	206283	233085	269808
A0A0C4DFV9	A0A0C4DFV9	A0A0C4DFV9_HUMAN	SET	Protein SET	1	ELNSNHDGADETSEK	ELNSNHDGADETS(UniMod:21)EK	2	ELNSNHDGADETS(UniMod:21)EK2	5.36926e+06	3.33385e+06	4.19479e+06
Q5JSH3	Q5JSH3	WDR44_HUMAN	WDR44	WD repeat-containing protein 44	1	ELSDQATASPIVAR	ELSDQATAS(UniMod:21)PIVAR	2	ELSDQATAS(UniMod:21)PIVAR2	215085	138937	160000
P18583	P18583;H7C1M2	SON_HUMAN	SON	Protein SON	1	EMEHNTVCAAGTSPVGEIGEEK	EMEHNTVC(UniMod:4)AAGTS(UniMod:21)PVGEIGEEK	3	EMEHNTVC(UniMod:4)AAGTS(UniMod:21)PVGEIGEEK3	1.07614e+06	859448	758278
Q8TCJ2	Q8TCJ2	STT3B_HUMAN	STT3B	Dolichyl-diphosphooligosaccharide--protein glycosyltransferase subunit STT3B	1	ENPPVEDSSDEDDK	ENPPVEDS(UniMod:21)S(UniMod:21)DEDDK	2	ENPPVEDS(UniMod:21)S(UniMod:21)DEDDK2	1.07941e+06	1.12947e+06	1.03233e+06
Q13427	Q13427;A0A7I2V629;E9PG73;C9JM79;A0A7I2V4F2;A0A7I2V5Q5	PPIG_HUMAN	PPIG	Peptidyl-prolyl cis-trans isomerase G	1	ENQRSPVR	ENQRS(UniMod:21)PVR	2	ENQRS(UniMod:21)PVR2			226995
Q92917	Q92917	GPKOW_HUMAN	GPKOW	G-patch domain and KOW motifs-containing protein	1	ENQVVELHYDAICQYMGPSDTDDD	ENQVVELHYDAIC(UniMod:4)QYMGPSDT(UniMod:21)DDD	3	ENQVVELHYDAIC(UniMod:4)QYMGPSDT(UniMod:21)DDD3	254861	232999
P23193	P23193;A0A1W2PRL9;E5RIS7;A0A1W2PPZ5	TCEA1_HUMAN	TCEA1	Transcription elongation factor A protein 1	1	EPAITSQNSPEAR	EPAITSQNS(UniMod:21)PEAR	2	EPAITSQNS(UniMod:21)PEAR2	1.99432e+06	1.92597e+06	1.95134e+06
P23193	P23193;A0A1W2PRL9;A0A1W2PPZ5	TCEA1_HUMAN	TCEA1	Transcription elongation factor A protein 1	1	EPAITSQNSPEAREESTSSGNVSNR	EPAITSQNSPEAREES(UniMod:21)TSSGNVSNR	3	EPAITSQNSPEAREES(UniMod:21)TSSGNVSNR3	228460
P35659	P35659;H0Y8X0;A0A494C198;A0A494C028;B4DFG0;H0Y993;D6R9L5	DEK_HUMAN	DEK	Protein DEK	1	EPEMPGPREESEEEEDEDDEEEEEEEK	EPEMPGPREES(UniMod:21)EEEEDEDDEEEEEEEK	3	EPEMPGPREES(UniMod:21)EEEEDEDDEEEEEEEK3	1.2289e+07	1.27625e+07	1.14182e+07
P54105	P54105;E9PJF4	ICLN_HUMAN	CLNS1A	Methylosome subunit pICln	1	EPVADEEEEDSDDDVEPITEFR	EPVADEEEEDS(UniMod:21)DDDVEPITEFR	3	EPVADEEEEDS(UniMod:21)DDDVEPITEFR3	774508	776248	737991
P42167	P42166;P42167;G5E972;H0YJH7	LAP2B_HUMAN	TMPO	Lamina-associated polypeptide 2, isoforms beta/gamma	1	EQGTESRSSTPLPTISSSAENTR	EQGTESRSS(UniMod:21)T(UniMod:21)PLPTISSSAENTR	3	EQGTESRSS(UniMod:21)T(UniMod:21)PLPTISSSAENTR3	948063	1.08225e+06	992996
Q13523	Q13523	PRP4B_HUMAN	PRPF4B	Serine/threonine-protein kinase PRP4 homolog	1	EQPEMEDANSEK	EQPEMEDANS(UniMod:21)EK	2	EQPEMEDANS(UniMod:21)EK2	169752	211269	140178
Q71RC2	Q71RC2;X6RLN4	LARP4_HUMAN	LARP4	La-related protein 4	1	EQYVPPRSPK	EQYVPPRS(UniMod:21)PK	2	EQYVPPRS(UniMod:21)PK2	382838	411900	360701
Q9UKL0	Q9UKL0	RCOR1_HUMAN	RCOR1	REST corepressor 1	1	EREESEDELEEANGNNPIDIEVDQNK	EREES(UniMod:21)EDELEEANGNNPIDIEVDQNK	3	EREES(UniMod:21)EDELEEANGNNPIDIEVDQNK3	1.23467e+06	1.4407e+06	1.35181e+06
P07814	P07814;V9GYZ6	SYEP_HUMAN	EPRS1	Bifunctional glutamate/proline--tRNA ligase	1	ERPTPSLNNNCTTSEDSLVLYNR	ERPTPSLNNNC(UniMod:4)TTSEDS(UniMod:21)LVLYNR	3	ERPTPSLNNNC(UniMod:4)TTSEDS(UniMod:21)LVLYNR3	214793	176552	181680
Q9Y2V2	Q9Y2V2;H3BPY5;H3BTK3;H3BSW7;I3L3X8;H3BUY4;H3BNU9	CHSP1_HUMAN	CARHSP1	Calcium-regulated heat-stable protein 1	1	ERSPSPLR	ERS(UniMod:21)PS(UniMod:21)PLR	2	ERS(UniMod:21)PS(UniMod:21)PLR2	721989	662840	497343
Q9Y2V2	Q9Y2V2;H3BPY5;H3BTK3;H3BSW7;I3L3X8;H3BUY4;H3BNU9	CHSP1_HUMAN	CARHSP1	Calcium-regulated heat-stable protein 1	1	ERSPSPLR	ERS(UniMod:21)PSPLR	2	ERS(UniMod:21)PSPLR2	443247		345933
Q6IBW4	Q6IBW4;A0A0A6YYG7;E5RJN3	CNDH2_HUMAN	NCAPH2	Condensin-2 complex subunit H2	1	ESRSPQQSAALPR	ES(UniMod:21)RSPQQSAALPR	3	ES(UniMod:21)RSPQQSAALPR3	205215	201472	257415
Q14676	Q14676	MDC1_HUMAN	MDC1	Mediator of DNA damage checkpoint protein 1	1	ESEDSETQPFDTHLEAYGPCLSPPR	ESEDSETQPFDTHLEAYGPC(UniMod:4)LS(UniMod:21)PPR	3	ESEDSETQPFDTHLEAYGPC(UniMod:4)LS(UniMod:21)PPR3		404641	366762
Q9BW71	Q9BW71	HIRP3_HUMAN	HIRIP3	HIRA-interacting protein 3	1	ESEQESEEEILAQK	ESEQES(UniMod:21)EEEILAQK	2	ESEQES(UniMod:21)EEEILAQK2	591727	594675	523193
O75528	O75528	TADA3_HUMAN	TADA3	Transcriptional adapter 3	1	ESGADGASTSPR	ESGADGASTS(UniMod:21)PR	2	ESGADGASTS(UniMod:21)PR2	197962	195835	201082
P25788	P25788;H0YJ03;G3V4X5	PSA3_HUMAN	PSMA3	Proteasome subunit alpha type-3	1	ESLKEEDESDDDNM	ESLKEEDES(UniMod:21)DDDNM	2	ESLKEEDES(UniMod:21)DDDNM2	1.66253e+07	1.46774e+07	1.50167e+07
Q9H307	Q9H307;G3V5F0;G3V579	PININ_HUMAN	PNN	Pinin	1	ESRQESDPEDDDVK	ESRQES(UniMod:21)DPEDDDVK	2	ESRQES(UniMod:21)DPEDDDVK2	1.00729e+06	988995	780818
Q04726	Q04726;H0YNT2;H0YKN8;H0YL70;H0YLW9;H0YLI3;H0YKT5;H0YKH0	TLE3_HUMAN	TLE3	Transducin-like enhancer protein 3	1	ESSANNSVSPSESLR	ESSANNSVS(UniMod:21)PSESLR	2	ESSANNSVS(UniMod:21)PSESLR2	1.00401e+06	875668	902406
O75122	O75122;A0A0U1RQI6;J3KR49;H7C4M5;E3W994;E7EW49;A0A804HJG7;E7ERI8	CLAP2_HUMAN	CLASP2	CLIP-associating protein 2	1	ESSRDTSPVR	ESSRDTS(UniMod:21)PVR	2	ESSRDTS(UniMod:21)PVR2		211906
P27816	P27816;A0A804HKE7;E7EVA0	MAP4_HUMAN	MAP4	Microtubule-associated protein 4	1	ETERASPIK	ETERAS(UniMod:21)PIK	2	ETERAS(UniMod:21)PIK2	5.51473e+06	4.86021e+06	4.05301e+06
Q6PKG0	Q6PKG0;A0A0B4J210;H0YBW1;E5RH50;A0A8I5KWU3;A0A8I5KSP1	LARP1_HUMAN	LARP1	La-related protein 1	1	ETESAPGSPR	ETES(UniMod:21)APGS(UniMod:21)PR	2	ETES(UniMod:21)APGS(UniMod:21)PR2	1.44951e+06	1.44782e+06	1.37303e+06
Q8IYB3	Q8IYB3;A9Z1X7	SRRM1_HUMAN	SRRM1	Serine/arginine repetitive matrix protein 1	1	ETESEAEDNLDDLEK	ETES(UniMod:21)EAEDNLDDLEK	2	ETES(UniMod:21)EAEDNLDDLEK2	106267	108036	132683
Q6PKG0	Q6PKG0;A0A0B4J210;H0YBW1;E5RH50;A0A8I5KWU3;A0A8I5KSP1	LARP1_HUMAN	LARP1	La-related protein 1	1	ETESAPGSPR	ETESAPGS(UniMod:21)PR	2	ETESAPGS(UniMod:21)PR2	311352	320016	354749
P80723	P80723	BASP1_HUMAN	BASP1	Brain acid soluble protein 1	1	ETPAATEAPSSTPK	ETPAATEAPSS(UniMod:21)TPK	2	ETPAATEAPSS(UniMod:21)TPK2	259268	215533	170212
Q9UHB6	Q9UHB6;F8VS07;F8VQE1	LIMA1_HUMAN	LIMA1	LIM domain and actin-binding protein 1	1	ETPHSPGVEDAPIAK	ETPHS(UniMod:21)PGVEDAPIAK	2	ETPHS(UniMod:21)PGVEDAPIAK2	3.17316e+06	3.24718e+06	2.97382e+06
Q9UHB6	Q9UHB6;F8VS07;F8VQE1	LIMA1_HUMAN	LIMA1	LIM domain and actin-binding protein 1	1	ETPHSPGVEDAPIAK	ETPHS(UniMod:21)PGVEDAPIAK	3	ETPHS(UniMod:21)PGVEDAPIAK3	2.79167e+06	3.3056e+06	2.3006e+06
Q9NYF8	Q9NYF8;A0A1W2PQ43;E9PK91;E9PK09;E9PKI6;E9PQN2	BCLF1_HUMAN	BCLAF1	Bcl-2-associated transcription factor 1	1	ETQSPEQVK	ETQS(UniMod:21)PEQVK	2	ETQS(UniMod:21)PEQVK2	3.05695e+06	3.03369e+06	3.35144e+06
O75475	O75475	PSIP1_HUMAN	PSIP1	PC4 and SFRS1-interacting protein	1	ETSVSKEDTDHEEK	ETS(UniMod:21)VSKEDTDHEEK	3	ETS(UniMod:21)VSKEDTDHEEK3	694526	628320	694426
P51532	P51532;A0A2R8Y4C5;A0A2R8YG32;A0A2R8Y6V2;A0A2R8YDA1;K7EQF0;A0A2R8YF58;K7EP28;A0A2R8YFK5;A0A2R8Y440;A0A2R8Y5K3;Q9HBD4;A0A2R8Y526;A0A2R8Y7F3;A0A2R8Y4P4;A0A2R8Y6N0;A0A2R8YF80;A0A2R8Y7Y7;A0A2R8Y7S2;A0A2R8YGG3;A0A2R8Y523	SMCA4_HUMAN	SMARCA4	Transcription activator BRG1	1	EVDYSDSLTEK	EVDYSDSLT(UniMod:21)EK	2	EVDYSDSLT(UniMod:21)EK2	423548	404923	361770
P19338	P19338;A0A7I2V3F3;A0A7I2V349;H7BY16;A0A7I2V2S8;A0A7I2V5M5;A0A7I2V506;A0A7I2V2U7;C9JLB1;A0A7I2V699;A0A7I2V428	NUCL_HUMAN	NCL	Nucleolin	1	EVEEDSEDEEMSEDEEDDSSGEEVVIPQK	EVEEDS(UniMod:21)EDEEMS(UniMod:21)EDEEDDS(UniMod:21)SGEEVVIPQK	3	EVEEDS(UniMod:21)EDEEMS(UniMod:21)EDEEDDS(UniMod:21)SGEEVVIPQK3		3.58358e+06	3.55298e+06
P19338	P19338;A0A7I2V3F3;A0A7I2V349;H7BY16;A0A7I2V2S8;A0A7I2V5M5;A0A7I2V506;A0A7I2V2U7;C9JLB1;A0A7I2V699;A0A7I2V428	NUCL_HUMAN	NCL	Nucleolin	1	EVEEDSEDEEMSEDEEDDSSGEEVVIPQK	EVEEDS(UniMod:21)EDEEMS(UniMod:21)EDEEDDSS(UniMod:21)GEEVVIPQK	3	EVEEDS(UniMod:21)EDEEMS(UniMod:21)EDEEDDSS(UniMod:21)GEEVVIPQK3	4.48169e+06
P19338	P19338;A0A7I2V3F3;A0A7I2V349;H7BY16;A0A7I2V2S8;A0A7I2V5M5;A0A7I2V506;A0A7I2V2U7;C9JLB1;A0A7I2V699;A0A7I2V428	NUCL_HUMAN	NCL	Nucleolin	1	EVEEDSEDEEMSEDEEDDSSGEEVVIPQKK	EVEEDSEDEEMSEDEEDDSS(UniMod:21)GEEVVIPQKK	3	EVEEDSEDEEMSEDEEDDSS(UniMod:21)GEEVVIPQKK3	172497	171871
P46821	P46821;D6RA40;D6RA32	MAP1B_HUMAN	MAP1B	Microtubule-associated protein 1B	1	EVPSKEEPSPVK	EVPSKEEPS(UniMod:21)PVK	2	EVPSKEEPS(UniMod:21)PVK2	1.12186e+06	924398	912353
P07900	P07900;G3V2J8	HS90A_HUMAN	HSP90AA1	Heat shock protein HSP 90-alpha	1	EVSDDEAEEK	EVS(UniMod:21)DDEAEEK	2	EVS(UniMod:21)DDEAEEK2	777712	752751	396391
P22234	P22234;E9PBS1	PUR6_HUMAN	PAICS	Bifunctional phosphoribosylaminoimidazole carboxylase/phosphoribosylaminoimidazole succinocarboxamide synthetase	1	EVYELLDSPGK	EVYELLDS(UniMod:21)PGK	2	EVYELLDS(UniMod:21)PGK2	449672	449098	486231
Q9H7N4	Q9H7N4	SFR19_HUMAN	SCAF1	Splicing factor, arginine/serine-rich 19	1	FDIYDPFHPTDEAYSPPPAPEQK	FDIYDPFHPTDEAYS(UniMod:21)PPPAPEQK	3	FDIYDPFHPTDEAYS(UniMod:21)PPPAPEQK3	1.51994e+06	1.66267e+06	1.4755e+06
P54105	P54105;E9PJF4	ICLN_HUMAN	CLNS1A	Methylosome subunit pICln	1	FEEESKEPVADEEEEDSDDDVEPITEFR	FEEESKEPVADEEEEDS(UniMod:21)DDDVEPITEFR	3	FEEESKEPVADEEEEDS(UniMod:21)DDDVEPITEFR3	2.67774e+07	2.69129e+07	2.66147e+07
Q13541	Q13541	4EBP1_HUMAN	EIF4EBP1	Eukaryotic translation initiation factor 4E-binding protein 1	1	FLMECRNSPVTK	FLMEC(UniMod:4)RNS(UniMod:21)PVTK	2	FLMEC(UniMod:4)RNS(UniMod:21)PVTK2	3.73315e+06	2.7387e+06	2.64433e+06
Q9NYF8	Q9NYF8;A0A1W2PQ43;E9PK91;E9PK09;E9PKI6;E9PQN2	BCLF1_HUMAN	BCLAF1	Bcl-2-associated transcription factor 1	1	FNDSEGDDTEETEDYR	FNDS(UniMod:21)EGDDTEETEDYR	2	FNDS(UniMod:21)EGDDTEETEDYR2	2.69598e+06	2.69855e+06	2.44006e+06
Q9NYF8	Q9NYF8;A0A1W2PQ43;E9PK91;E9PK09;E9PKI6;E9PQN2	BCLF1_HUMAN	BCLAF1	Bcl-2-associated transcription factor 1	1	FNDSEGDDTEETEDYRQFR	FNDS(UniMod:21)EGDDTEETEDYRQFR	3	FNDS(UniMod:21)EGDDTEETEDYRQFR3	156010	199420
Q99576	Q99576;Q5JRJ2;A0A8I5KT94;E7EWD5;Q5JRJ0	T22D3_HUMAN	TSC22D3	TSC22 domain family protein 3	1	FQSCLSPEEPAPESPQVPEAPGGSAV	FQSC(UniMod:4)LS(UniMod:21)PEEPAPESPQVPEAPGGSAV	3	FQSC(UniMod:4)LS(UniMod:21)PEEPAPESPQVPEAPGGSAV3	314707	242534	232635
Q9Y2W1	Q9Y2W1	TR150_HUMAN	THRAP3	Thyroid hormone receptor-associated protein 3	1	FSGEEGEIEDDESGTENREEK	FSGEEGEIEDDES(UniMod:21)GTENREEK	3	FSGEEGEIEDDES(UniMod:21)GTENREEK3		537961	496948
Q7Z417	Q7Z417	NUFP2_HUMAN	NUFIP2	Nuclear fragile X mental retardation-interacting protein 2	1	GADNDGSGSESGYTTPK	GADNDGS(UniMod:21)GSESGYTTPK	2	GADNDGS(UniMod:21)GSESGYTTPK2	344709	343473	343688
Q99549	Q99549	MPP8_HUMAN	MPHOSPH8	M-phase phosphoprotein 8	1	GAEAFGDSEEDGEDVFEVEK	GAEAFGDS(UniMod:21)EEDGEDVFEVEK	3	GAEAFGDS(UniMod:21)EEDGEDVFEVEK3	38375.1
P46821	P46821	MAP1B_HUMAN	MAP1B	Microtubule-associated protein 1B	1	GAESPFEEK	GAES(UniMod:21)PFEEK	2	GAES(UniMod:21)PFEEK2	409707	361924	345821
P35579	P35579;A0A8I5KWT8	MYH9_HUMAN	MYH9	Myosin-9	1	GAGDGSDEEVDGK	GAGDGS(UniMod:21)DEEVDGK	2	GAGDGS(UniMod:21)DEEVDGK2	409490	395208	378980
Q96ST3	Q96ST3	SIN3A_HUMAN	SIN3A	Paired amphipathic helix protein Sin3a	1	GDLSDVEEEEEEEMDVDEATGAVK	GDLS(UniMod:21)DVEEEEEEEMDVDEATGAVK	3	GDLS(UniMod:21)DVEEEEEEEMDVDEATGAVK3	383695	346745	366420
O00264	O00264	PGRC1_HUMAN	PGRMC1	Membrane-associated progesterone receptor component 1	1	GDQPAASGDSDDDEPPPLPR	GDQPAAS(UniMod:21)GDSDDDEPPPLPR	3	GDQPAAS(UniMod:21)GDSDDDEPPPLPR3	50982.4	129229	66498.2
Q9UKV3	Q9UKV3;E7EQT4;S4R3H4	ACINU_HUMAN	ACIN1	Apoptotic chromatin condensation inducer in the nucleus	1	GDSDDEKPR	GDS(UniMod:21)DDEKPR	2	GDS(UniMod:21)DDEKPR2		225644
Q92733	Q92733	PRCC_HUMAN	PRCC	Proline-rich protein PRCC	1	GDSDSEEDEPTK	GDS(UniMod:21)DSEEDEPTK	2	GDS(UniMod:21)DSEEDEPTK2	117321	104421	79296.2
Q86U86	Q86U86;E7EVG2;H0Y5B5;C9JPI5	PB1_HUMAN	PBRM1	Protein polybromo-1	1	GEADDEDDDEDGQDNQGTVTEGSSPAYLK	GEADDEDDDEDGQDNQGTVTEGSS(UniMod:21)PAYLK	3	GEADDEDDDEDGQDNQGTVTEGSS(UniMod:21)PAYLK3		224711	143588
P46821	P46821	MAP1B_HUMAN	MAP1B	Microtubule-associated protein 1B	1	GEAEQSEEEADEEDK	GEAEQS(UniMod:21)EEEADEEDK	2	GEAEQS(UniMod:21)EEEADEEDK2	799595	715788	606881
Q12906	Q12906	ILF3_HUMAN	ILF3	Interleukin enhancer-binding factor 3	1	GEDSAEETEAK	GEDS(UniMod:21)AEETEAK	2	GEDS(UniMod:21)AEETEAK2	2.30741e+06	2.25143e+06	2.50914e+06
Q9UQ35	Q9UQ35	SRRM2_HUMAN	SRRM2	Serine/arginine repetitive matrix protein 2	1	GEFSASPMLK	GEFSAS(UniMod:21)PMLK	2	GEFSAS(UniMod:21)PMLK2	1.69993e+06	1.64013e+06	1.46796e+06
Q9UQ35	Q9UQ35;I3L4D8;I3L182;A0A087X1W1;I3L1I8	SRRM2_HUMAN	SRRM2	Serine/arginine repetitive matrix protein 2	1	GEGDAPFSEPGTTSTQRPSSPETATK	GEGDAPFSEPGTTSTQRPS(UniMod:21)S(UniMod:21)PETATK	3	GEGDAPFSEPGTTSTQRPS(UniMod:21)S(UniMod:21)PETATK3	755816	958995	616950
Q9UQ35	Q9UQ35;I3L4D8;I3L182;A0A087X1W1;I3L1I8	SRRM2_HUMAN	SRRM2	Serine/arginine repetitive matrix protein 2	1	GEGDAPFSEPGTTSTQRPSSPETATK	GEGDAPFSEPGTTSTQRPS(UniMod:21)SPETATK	3	GEGDAPFSEPGTTSTQRPS(UniMod:21)SPETATK3			2.74128e+06
Q9UQ35	Q9UQ35;I3L4D8;I3L182;A0A087X1W1;I3L1I8	SRRM2_HUMAN	SRRM2	Serine/arginine repetitive matrix protein 2	1	GEGDAPFSEPGTTSTQRPSSPETATK	GEGDAPFSEPGTTSTQRPSS(UniMod:21)PETATK	3	GEGDAPFSEPGTTSTQRPSS(UniMod:21)PETATK3	2.94199e+06	3.05699e+06	2.63446e+06
P29966	P29966	MARCS_HUMAN	MARCKS	Myristoylated alanine-rich C-kinase substrate	1	GEPAAAAAPEAGASPVEK	GEPAAAAAPEAGAS(UniMod:21)PVEK	2	GEPAAAAAPEAGAS(UniMod:21)PVEK2	358644	407292	296406
P49840;P49841	P49840;P49841;A0A7I2V626;A0A3B3ITW1;A0A7I2V3J4;A0A7I2V4G2;A0A7I2V341;A0A7I2V442;A0A7I2YQK2;A0A7I2YQK0;A0A7I2V2Q4;A8MT37;A0A7I2V3M8	GSK3A_HUMAN;GSK3B_HUMAN	GSK3A;GSK3B	Glycogen synthase kinase-3 alpha	0	GEPNVSYICSR	GEPNVSYIC(UniMod:4)S(UniMod:21)R	2	GEPNVSYIC(UniMod:4)S(UniMod:21)R2	1.86902e+06	2.44205e+06	2.00108e+06
P49006	P49006	MRP_HUMAN	MARCKSL1	MARCKS-related protein	1	GEVPPKETPK	GEVPPKET(UniMod:21)PK	2	GEVPPKET(UniMod:21)PK2	420647	489466	397509
Q9Y5S9	Q9Y5S9	RBM8A_HUMAN	RBM8A	RNA-binding protein 8A	1	GFGSEEGSR	GFGS(UniMod:21)EEGSR	2	GFGS(UniMod:21)EEGSR2	294339	215467	245009
Q96QR8	Q96QR8	PURB_HUMAN	PURB	Transcriptional activator protein Pur-beta	1	GGGSGGGEESEGEEVDED	GGGS(UniMod:21)GGGEESEGEEVDED	2	GGGS(UniMod:21)GGGEESEGEEVDED2	346446
Q9BRQ0	Q9BRQ0;Q5T171	PYGO2_HUMAN	PYGO2	Pygopus homolog 2	1	GGGTPDANSLAPPGK	GGGT(UniMod:21)PDANSLAPPGK	2	GGGT(UniMod:21)PDANSLAPPGK2	368088	356222	288000
P30419	P30419;A0A7I2V3M5;A0A7I2V3X4;A0A7I2V4Y5;K7EN42;A0A7I2V3U5;A0A7I2V539;B7Z8J4	NMT1_HUMAN	NMT1	Glycylpeptide N-tetradecanoyltransferase 1	1	GGLSPANDTGAK	GGLS(UniMod:21)PANDTGAK	2	GGLS(UniMod:21)PANDTGAK2	1.36953e+06	1.37756e+06	1.12115e+06
A0A0G2JJB9;Q5STZ8	Q8NE71;Q5STZ8;F5GYK6;A0A0G2JJB9	A0A0G2JJB9_HUMAN;Q5STZ8_HUMAN	ABCF1	ATP-binding cassette sub-family F member 1 (Fragment)	1	GGNVFAALIQDQSEEEEEEEK	GGNVFAALIQDQS(UniMod:21)EEEEEEEK	3	GGNVFAALIQDQS(UniMod:21)EEEEEEEK3	3.1914e+06	3.06076e+06	3.31679e+06
Q09666	Q09666	AHNK_HUMAN	AHNAK	Neuroblast differentiation-associated protein AHNAK	1	GGVTGSPEASISGSK	GGVTGS(UniMod:21)PEASISGSK	2	GGVTGS(UniMod:21)PEASISGSK2	6.33936e+06	5.54427e+06	5.20064e+06
Q09666	Q09666	AHNK_HUMAN	AHNAK	Neuroblast differentiation-associated protein AHNAK	1	GHYEVTGSDDETGK	GHYEVTGS(UniMod:21)DDETGK	2	GHYEVTGS(UniMod:21)DDETGK2	3.83999e+06	3.76253e+06	3.44264e+06
O75821	O75821;K7EL20;K7ENA8;K7EL60;K7ER90	EIF3G_HUMAN	EIF3G	Eukaryotic translation initiation factor 3 subunit G	1	GIPLATGDTSPEPELLPGAPLPPPK	GIPLATGDTS(UniMod:21)PEPELLPGAPLPPPK	3	GIPLATGDTS(UniMod:21)PEPELLPGAPLPPPK3	2.85074e+06	2.64055e+06	2.26719e+06
P41227	P41227	NAA10_HUMAN	NAA10	N-alpha-acetyltransferase 10	1	GLAAEDSGGDSK	GLAAEDS(UniMod:21)GGDSK	2	GLAAEDS(UniMod:21)GGDSK2	186030	185755	193746
Q9P206	Q9P206	K1522_HUMAN	KIAA1522	Uncharacterized protein KIAA1522	1	GLAGPPASPGK	GLAGPPAS(UniMod:21)PGK	2	GLAGPPAS(UniMod:21)PGK2	299966	273103	309678
Q13425	Q13425;A0A140TA73	SNTB2_HUMAN	SNTB2	Beta-2-syntrophin	1	GLGPPSPPAPPR	GLGPPS(UniMod:21)PPAPPR	2	GLGPPS(UniMod:21)PPAPPR2	348810	349948	225892
Q9NPQ8	Q9NPQ8;H0YC88;H0YE35	RIC8A_HUMAN	RIC8A	Synembryn-A	1	GLMAGGRPEGQYSEDEDTDTDEYK	GLMAGGRPEGQYS(UniMod:21)EDEDT(UniMod:21)DTDEYK	3	GLMAGGRPEGQYS(UniMod:21)EDEDT(UniMod:21)DTDEYK3	425855	484751	377617
Q5JTV8	Q5JTV8;H0YDU3;A0A0A0MSK5;J3KN66	TOIP1_HUMAN	TOR1AIP1	Torsin-1A-interacting protein 1	1	GLRDSHSSEEDEASSQTDLSQTISK	GLRDS(UniMod:21)HS(UniMod:21)S(UniMod:21)EEDEASSQTDLSQTISK	3	GLRDS(UniMod:21)HS(UniMod:21)S(UniMod:21)EEDEASSQTDLSQTISK3	533244	498667	397004
Q5JTV8	Q5JTV8;H0YDU3;A0A0A0MSK5;J3KN66	TOIP1_HUMAN	TOR1AIP1	Torsin-1A-interacting protein 1	1	GLRDSHSSEEDEASSQTDLSQTISK	GLRDSHS(UniMod:21)S(UniMod:21)EEDEASSQTDLSQTISK	3	GLRDSHS(UniMod:21)S(UniMod:21)EEDEASSQTDLSQTISK3	921131	748790	848772
P51858	P51858	HDGF_HUMAN	HDGF	Hepatoma-derived growth factor	1	GNAEGSSDEEGK	GNAEGS(UniMod:21)S(UniMod:21)DEEGK	2	GNAEGS(UniMod:21)S(UniMod:21)DEEGK2	903037	994868	799552
P51858	P51858	HDGF_HUMAN	HDGF	Hepatoma-derived growth factor	1	GNAEGSSDEEGKLVIDEPAK	GNAEGS(UniMod:21)S(UniMod:21)DEEGKLVIDEPAK	3	GNAEGS(UniMod:21)S(UniMod:21)DEEGKLVIDEPAK3	1.08718e+06	857510	985074
P49736	P49736;C9J013;F8WDM3;C9JZ21	MCM2_HUMAN	MCM2	DNA replication licensing factor MCM2	1	GNDPLTSSPGR	GNDPLTSS(UniMod:21)PGR	2	GNDPLTSS(UniMod:21)PGR2	3.05273e+06	3.2494e+06	2.95826e+06
O75351	O75351;K7EKZ3	VPS4B_HUMAN	VPS4B	Vacuolar protein sorting-associated protein 4B	1	GNDSDGEGESDDPEK	GNDS(UniMod:21)DGEGESDDPEK	2	GNDS(UniMod:21)DGEGESDDPEK2	568909	571749	416665
Q9Y2V2	Q9Y2V2;H3BPY5;H3BTK3;H3BSW7;I3L3X8;H3BUY4;H3BNU9	CHSP1_HUMAN	CARHSP1	Calcium-regulated heat-stable protein 1	1	GNVVPSPLPTR	GNVVPS(UniMod:21)PLPTR	2	GNVVPS(UniMod:21)PLPTR2	350744	355746	279611
Q9Y2V2	Q9Y2V2;H3BPY5;H3BTK3;H3BSW7;I3L3X8;H3BUY4;H3BNU9	CHSP1_HUMAN	CARHSP1	Calcium-regulated heat-stable protein 1	1	GNVVPSPLPTRR	GNVVPS(UniMod:21)PLPTRR	2	GNVVPS(UniMod:21)PLPTRR2	440893	532877	432144
Q96ST2	Q96ST2	IWS1_HUMAN	IWS1	Protein IWS1 homolog	1	GPASDSETEDASR	GPAS(UniMod:21)DS(UniMod:21)ETEDASR	2	GPAS(UniMod:21)DS(UniMod:21)ETEDASR2	1.04531e+06	854875	923819
O95400	O95400	CD2B2_HUMAN	CD2BP2	CD2 antigen cytoplasmic tail-binding protein 2	1	GPGQPSSPQR	GPGQPSS(UniMod:21)PQR	2	GPGQPSS(UniMod:21)PQR2	88758.6	84305.7	78183.6
Q6ZTN6	Q6ZTN6;A0A6E1YH78	AN13D_HUMAN	ANKRD13D	Ankyrin repeat domain-containing protein 13D	1	GPGSPPRTPPAPGPPSFEEQLR	GPGS(UniMod:21)PPRT(UniMod:21)PPAPGPPSFEEQLR	3	GPGS(UniMod:21)PPRT(UniMod:21)PPAPGPPSFEEQLR3	83810	69156.5	36186.8
Q9UKJ3	Q9UKJ3	GPTC8_HUMAN	GPATCH8	G patch domain-containing protein 8	1	GPKPEPPGSGSPAPPR	GPKPEPPGSGS(UniMod:21)PAPPR	3	GPKPEPPGSGS(UniMod:21)PAPPR3	146940	143471
P42167	P42166;P42167;G5E972	LAP2B_HUMAN	TMPO	Lamina-associated polypeptide 2, isoforms beta/gamma	1	GPPDFSSDEEREPTPVLGSGAAAAGR	GPPDFS(UniMod:21)S(UniMod:21)DEEREPTPVLGSGAAAAGR	3	GPPDFS(UniMod:21)S(UniMod:21)DEEREPTPVLGSGAAAAGR3	3.52162e+06	3.91451e+06	3.5174e+06
P42167	P42166;P42167;G5E972	LAP2B_HUMAN	TMPO	Lamina-associated polypeptide 2, isoforms beta/gamma	1	GPPDFSSDEEREPTPVLGSGAAAAGR	GPPDFSSDEEREPT(UniMod:21)PVLGSGAAAAGR	3	GPPDFSSDEEREPT(UniMod:21)PVLGSGAAAAGR3	2.86353e+06	3.01513e+06	2.76003e+06
P46087	P46087	NOP2_HUMAN	NOP2	Probable 28S rRNA (cytosine(4447)-C(5))-methyltransferase	1	GPQPPTVSPIR	GPQPPTVS(UniMod:21)PIR	2	GPQPPTVS(UniMod:21)PIR2	938385	867933	687362
O95684	O95684	CEP43_HUMAN	CEP43	Centrosomal protein 43	1	GPTTGEGALDLSDVHSPPKSPEGK	GPTTGEGALDLS(UniMod:21)DVHSPPKS(UniMod:21)PEGK	3	GPTTGEGALDLS(UniMod:21)DVHSPPKS(UniMod:21)PEGK3	1.2202e+06	1.38151e+06	1.30715e+06
P18206	P18206	VINC_HUMAN	VCL	Vinculin	1	GQGSSPVAMQK	GQGSS(UniMod:21)PVAMQK	2	GQGSS(UniMod:21)PVAMQK2	65229.7	74774	103669
Q86VR2	Q86VR2;K7EQI9	RETR3_HUMAN	RETREG3	Reticulophagy regulator 3	1	GQTPLTEGSEDLDGHSDPEESFAR	GQTPLTEGSEDLDGHS(UniMod:21)DPEESFAR	3	GQTPLTEGSEDLDGHS(UniMod:21)DPEESFAR3	200563	254661	187286
Q8IXQ4	Q8IXQ4;A0A0A0MRI1	GPAM1_HUMAN	GPALPP1	GPALPP motifs-containing protein 1	1	GRDDPGQQETDSSEDEDIIGPMPAK	GRDDPGQQET(UniMod:21)DS(UniMod:21)S(UniMod:21)EDEDIIGPMPAK	3	GRDDPGQQET(UniMod:21)DS(UniMod:21)S(UniMod:21)EDEDIIGPMPAK3	237724	86080.9	62222.3
Q13242	Q13242	SRSF9_HUMAN	SRSF9	Serine/arginine-rich splicing factor 9	1	GRDSPYQSR	GRDS(UniMod:21)PYQSR	2	GRDS(UniMod:21)PYQSR2	245871	243674	263353
Q8WXI9	Q8WXI9;A0A0U1RR34;A0A0U1RRM1;A0A0U1RRK3	P66B_HUMAN	GATAD2B	Transcriptional repressor p66-beta	1	GRLTPSPDIIVLSDNEASSPR	GRLT(UniMod:21)PS(UniMod:21)PDIIVLSDNEAS(UniMod:21)SPR	3	GRLT(UniMod:21)PS(UniMod:21)PDIIVLSDNEAS(UniMod:21)SPR3	578682	382743	266430
Q9UQ35	Q9UQ35	SRRM2_HUMAN	SRRM2	Serine/arginine repetitive matrix protein 2	1	GRSECDSSPEPK	GRSEC(UniMod:4)DS(UniMod:21)S(UniMod:21)PEPK	2	GRSEC(UniMod:4)DS(UniMod:21)S(UniMod:21)PEPK2	221352	250650	260073
Q9UQ35	Q9UQ35	SRRM2_HUMAN	SRRM2	Serine/arginine repetitive matrix protein 2	1	GRSECDSSPEPK	GRSEC(UniMod:4)DSS(UniMod:21)PEPK	2	GRSEC(UniMod:4)DSS(UniMod:21)PEPK2	150688		124259
Q14195	Q14195;H0YBT4	DPYL3_HUMAN	DPYSL3	Dihydropyrimidinase-related protein 3	1	GSPTRPNPPVR	GS(UniMod:21)PTRPNPPVR	2	GS(UniMod:21)PTRPNPPVR2	1.44054e+06	1.39343e+06	1.21985e+06
Q9NYV4	Q9NYV4;J3QSD7	CDK12_HUMAN	CDK12	Cyclin-dependent kinase 12	1	GSPVFLPR	GS(UniMod:21)PVFLPR	2	GS(UniMod:21)PVFLPR2	300963	290510	234813
O15027	O15027;A0A3F2YNZ0;F1T0I1;A0A3F2YNX0;A0A8I5KPG1	SC16A_HUMAN	SEC16A	Protein transport protein Sec16A	1	GSVSQPSTPSPPKPTGIFQTSANSSFEPVK	GS(UniMod:21)VS(UniMod:21)QPSTPS(UniMod:21)PPKPTGIFQTSANSSFEPVK	3	GS(UniMod:21)VS(UniMod:21)QPSTPS(UniMod:21)PPKPTGIFQTSANSSFEPVK3	246035	147178	227595
Q9UN37	Q9UN37;I3L4J1	VPS4A_HUMAN	VPS4A	Vacuolar protein sorting-associated protein 4A	1	GSDSDSEGDNPEK	GSDS(UniMod:21)DSEGDNPEK	2	GSDS(UniMod:21)DSEGDNPEK2	119848	140798	135582
Q9Y2W1	Q9Y2W1;A0A3B3ITZ9	TR150_HUMAN	THRAP3	Thyroid hormone receptor-associated protein 3	1	GSFSDTGLGDGK	GSFS(UniMod:21)DTGLGDGK	2	GSFS(UniMod:21)DTGLGDGK2	818256	692915	613873
Q86VQ1	Q86VQ1	GLCI1_HUMAN	GLCCI1	Glucocorticoid-induced transcript 1 protein	1	GSQHSPTRPPVAAAAASLGSLPGPGAAR	GSQHSPT(UniMod:21)RPPVAAAAASLGSLPGPGAAR	3	GSQHSPT(UniMod:21)RPPVAAAAASLGSLPGPGAAR3	460578	352109	444956
Q9Y6D5	Q9Y6D5;A0A7P0T9L6;A0A7P0T9L9;A0A7P0Z446;A0A7P0T7Z2;A0A7P0TA34	BIG2_HUMAN	ARFGEF2	Brefeldin A-inhibited guanine nucleotide-exchange protein 2	1	GSSLSGTDDGAQEVVK	GSS(UniMod:21)LSGTDDGAQEVVK	2	GSS(UniMod:21)LSGTDDGAQEVVK2	397098	429294	380995
Q9UPQ0	Q9UPQ0;D6RD46;H0Y8P3;G5EA03;E9PDJ9;E7EPK0;D6RJ93;D6R8Y0;Q6NVB9	LIMC1_HUMAN	LIMCH1	LIM and calponin homology domains-containing protein 1	1	GSSDGRGSDSESDLPHR	GSSDGRGS(UniMod:21)DSESDLPHR	3	GSSDGRGS(UniMod:21)DSESDLPHR3	1.36635e+06	1.40147e+06	1.51059e+06
P11388	P11388	TOP2A_HUMAN	TOP2A	DNA topoisomerase 2-alpha	1	GSVPLSSSPPATHFPDETEITNPVPK	GSVPLSSS(UniMod:21)PPATHFPDETEITNPVPK	3	GSVPLSSS(UniMod:21)PPATHFPDETEITNPVPK3	4.18519e+06	4.41899e+06	4.3824e+06
Q9UDY2	Q9UDY2;A0A3B3IU51;A0A1B0GTW1;A0A3B3ITE1;A0A2R8YDH4;A0A3B3IS03	ZO2_HUMAN	TJP2	Tight junction protein ZO-2	1	GSYGSDAEEEEYRQQLSEHSK	GSYGS(UniMod:21)DAEEEEYRQQLSEHSK	3	GSYGS(UniMod:21)DAEEEEYRQQLSEHSK3		361924	366309
P21127;Q9UQ88	P21127;Q9UQ88;A0A0D9SEN2;A0A0D9SER5;A0A0D9SEI3;Q5QPR4;Q5QPR3	CD11A_HUMAN;CD11B_HUMAN	CDK11A;CDK11B	Cyclin-dependent kinase 11B	0	GTSPRPPEGGLGYSQLGDDDLK	GT(UniMod:21)SPRPPEGGLGYSQLGDDDLK	3	GT(UniMod:21)SPRPPEGGLGYSQLGDDDLK3	201850		257206
P46087	P46087	NOP2_HUMAN	NOP2	Probable 28S rRNA (cytosine(4447)-C(5))-methyltransferase	1	GTDTQTPAVLSPSK	GTDTQTPAVLS(UniMod:21)PSK	2	GTDTQTPAVLS(UniMod:21)PSK2	112990
Q9HCN4	Q9HCN4	GPN1_HUMAN	GPN1	GPN-loop GTPase 1	1	GTLDEEDEEADSDTDDIDHR	GTLDEEDEEADS(UniMod:21)DTDDIDHR	3	GTLDEEDEEADS(UniMod:21)DTDDIDHR3	633396	526637	612877
P52594	P52594;B8ZZY2;C9J2I0	AGFG1_HUMAN	AGFG1	Arf-GAP domain and FG repeat-containing protein 1	1	GTPSQSPVVGR	GTPSQS(UniMod:21)PVVGR	2	GTPSQS(UniMod:21)PVVGR2	1.52322e+06	1.74154e+06	1.52499e+06
P21127;Q9UQ88	P21127;Q9UQ88;A0A0D9SEN2;A0A0D9SER5;A0A0D9SEI3;Q5QPR4;Q5QPR3	CD11A_HUMAN;CD11B_HUMAN	CDK11A;CDK11B	Cyclin-dependent kinase 11B	0	GTSPRPPEGGLGYSQLGDDDLK	GTS(UniMod:21)PRPPEGGLGYSQLGDDDLK	3	GTS(UniMod:21)PRPPEGGLGYSQLGDDDLK3		337706
Q8WUB8	Q8WUB8;S5FZ81	PHF10_HUMAN	PHF10	PHD finger protein 10	1	GTSDSSSGNVSEGESPPDSQEDSFQGR	GTSDSS(UniMod:21)SGNVSEGESPPDSQEDSFQGR	3	GTSDSS(UniMod:21)SGNVSEGESPPDSQEDSFQGR3		215286	110657
Q9Y4P8	Q9Y4P8	WIPI2_HUMAN	WIPI2	WD repeat domain phosphoinositide-interacting protein 2	1	GTYVPSSPTR	GTYVPSS(UniMod:21)PTR	2	GTYVPSS(UniMod:21)PTR2	238479	212368	223439
P49959	P49959;F8W7U8	MRE11_HUMAN	MRE11	Double-strand break repair protein MRE11	1	GVDFESSEDDDDDPFMNTSSLRR	GVDFES(UniMod:21)S(UniMod:21)EDDDDDPFMNTSSLRR	3	GVDFES(UniMod:21)S(UniMod:21)EDDDDDPFMNTSSLRR3	507909	464512	408074
Q9UKV3	Q9UKV3;E7EQT4;G3V3B0;S4R3H4;G3V3T3	ACINU_HUMAN	ACIN1	Apoptotic chromatin condensation inducer in the nucleus	1	GVPAGNSDTEGGQPGR	GVPAGNSDT(UniMod:21)EGGQPGR	2	GVPAGNSDT(UniMod:21)EGGQPGR2	241706	241022	208738
Q8TAD8	Q8TAD8	SNIP1_HUMAN	SNIP1	Smad nuclear-interacting protein 1	1	GVSRSPPK	GVSRS(UniMod:21)PPK	2	GVSRS(UniMod:21)PPK2	266486	279007	267824
Q01518	Q01518;Q5T0R9;Q5T0R7;Q5T0R4;Q5T0R2;Q5T0R8;Q5T0R6;Q5T0R1;Q5T0R5;Q5T0R3;Q5T0S3	CAP1_HUMAN	CAP1	Adenylyl cyclase-associated protein 1	1	GYADSPSK	GYADS(UniMod:21)PSK	2	GYADS(UniMod:21)PSK2	195480	209328	266858
Q92538	Q92538;A0A669KBG8;A0A7I2YQ79;A0A7I2V3Y5;A0A7I2V4K2;A0A669KB10;A0A7I2V452;A0A7I2V2L4;A0A7I2V2L5;A0A7I2V529;A0A7I2YQ65;A0A7I2V4N5;A0A7I2V514;A0A7I2YQM2;A0A7I2YQE0;A0A7P0RGV0;A0A7I2V5V9	GBF1_HUMAN	GBF1	Golgi-specific brefeldin A-resistance guanine nucleotide exchange factor 1	1	GYTSDSEVYTDHGRPGK	GYTS(UniMod:21)DSEVYTDHGRPGK	3	GYTS(UniMod:21)DSEVYTDHGRPGK3	504369	516022	688170
Q15149	Q15149;A0A8I5KYZ1;A0A8I5KSD5;E9PMV1;A0A8I5KUE3;H0YDN1	PLEC_HUMAN	PLEC	Plectin	1	GYYSPYSVSGSGSTAGSR	GYYSPYSVSGSGST(UniMod:21)AGSR	2	GYYSPYSVSGSGST(UniMod:21)AGSR2	277436	425014	184595
P13051	P13051	UNG_HUMAN	UNG	Uracil-DNA glycosylase	1	HAPSPEPAVQGTGVAGVPEESGDAAAIPAK	HAPS(UniMod:21)PEPAVQGTGVAGVPEESGDAAAIPAK	3	HAPS(UniMod:21)PEPAVQGTGVAGVPEESGDAAAIPAK3	1.37442e+06	1.2664e+06	1.25017e+06
P42167	P42167;G5E972;H0YJH7	LAP2B_HUMAN	TMPO	Lamina-associated polypeptide 2, isoforms beta/gamma	1	HASPILPITEFSDIPR	HAS(UniMod:21)PILPITEFSDIPR	3	HAS(UniMod:21)PILPITEFSDIPR3	35738.1	124984	24529.3
Q5SW79	Q5SW79;H0Y2V6	CE170_HUMAN	CEP170	Centrosomal protein of 170 kDa	1	HDDGTQSDSENAGAHR	HDDGTQS(UniMod:21)DSENAGAHR	3	HDDGTQS(UniMod:21)DSENAGAHR3		45580.5	44057.3
P31948	P31948;H0YGI8	STIP1_HUMAN	STIP1	Stress-induced-phosphoprotein 1	1	HDSPEDVK	HDS(UniMod:21)PEDVK	2	HDS(UniMod:21)PEDVK2	980476	897109	930517
O75592	O75592;A0A804HIR9;A0A804HL12;A0A804HJ25;A0A499FJI4;A0A804HKQ1	MYCB2_HUMAN	MYCBP2	E3 ubiquitin-protein ligase MYCBP2	1	HEDEQALLDQNSQTPPPSPFSVQAFNK	HEDEQALLDQNS(UniMod:21)QTPPPSPFSVQAFNK	3	HEDEQALLDQNS(UniMod:21)QTPPPSPFSVQAFNK3		416925	436076
Q01082	Q01082;A0A087WUZ3	SPTB2_HUMAN	SPTBN1	Spectrin beta chain, non-erythrocytic 1	1	HEVSASTQSTPASSR	HEVSASTQST(UniMod:21)PASSR	2	HEVSASTQST(UniMod:21)PASSR2	134759	127484	118422
Q9UQ35	Q9UQ35;I3L4D8;I3L182	SRRM2_HUMAN	SRRM2	Serine/arginine repetitive matrix protein 2	1	HGGSPQPLATTPLSQEPVNPPSEASPTR	HGGS(UniMod:21)PQPLATTPLSQEPVNPPSEAS(UniMod:21)PTR	3	HGGS(UniMod:21)PQPLATTPLSQEPVNPPSEAS(UniMod:21)PTR3	70440.2	322036	182917
Q96E09	Q96E09	PBIR1_HUMAN	PABIR1	PPP2R1A-PPP2R2A-interacting phosphatase regulator 1	1	HGLLLPASPVR	HGLLLPAS(UniMod:21)PVR	2	HGLLLPAS(UniMod:21)PVR2	289112	249564
Q86YZ3	Q86YZ3	HORN_HUMAN	HRNR	Hornerin	1	HGSGSGQSPSPSR	HGSGSGQSPS(UniMod:21)PSR	2	HGSGSGQSPS(UniMod:21)PSR2			322072
Q9Y2X3	Q9Y2X3	NOP58_HUMAN	NOP58	Nucleolar protein 58	1	HIKEEPLSEEEPCTSTAIASPEK	HIKEEPLS(UniMod:21)EEEPC(UniMod:4)TSTAIAS(UniMod:21)PEK	3	HIKEEPLS(UniMod:21)EEEPC(UniMod:4)TSTAIAS(UniMod:21)PEK3	2.68571e+06	2.46865e+06	2.38208e+06
Q9Y2X3	Q9Y2X3	NOP58_HUMAN	NOP58	Nucleolar protein 58	1	HIKEEPLSEEEPCTSTAIASPEK	HIKEEPLS(UniMod:21)EEEPC(UniMod:4)TSTAIASPEK	3	HIKEEPLS(UniMod:21)EEEPC(UniMod:4)TSTAIASPEK3	2.5904e+06	2.74378e+06	2.58694e+06
Q8IYB3	Q8IYB3;M0R088;A9Z1X7	SRRM1_HUMAN	SRRM1	Serine/arginine repetitive matrix protein 1	1	HRPSPPATPPPK	HRPS(UniMod:21)PPAT(UniMod:21)PPPK	3	HRPS(UniMod:21)PPAT(UniMod:21)PPPK3	1.77003e+06	1.84684e+06	1.89132e+06
Q9UQ35	Q9UQ35;I3L4D8;I3L182	SRRM2_HUMAN	SRRM2	Serine/arginine repetitive matrix protein 2	1	HSCSGSSPPR	HSC(UniMod:4)SGSS(UniMod:21)PPR	2	HSC(UniMod:4)SGSS(UniMod:21)PPR2	1.30423e+06	1.14991e+06	1.07844e+06
Q9UQ35	Q9UQ35;I3L4D8;I3L182	SRRM2_HUMAN	SRRM2	Serine/arginine repetitive matrix protein 2	1	HSCSGSSPPRVK	HSC(UniMod:4)SGSS(UniMod:21)PPRVK	3	HSC(UniMod:4)SGSS(UniMod:21)PPRVK3	720239	766092	645251
Q9UQ35	Q9UQ35	SRRM2_HUMAN	SRRM2	Serine/arginine repetitive matrix protein 2	1	HSLSGSSPGMK	HSLSGSS(UniMod:21)PGMK	2	HSLSGSS(UniMod:21)PGMK2	397774	411012	347599
Q13547	Q13547	HDAC1_HUMAN	HDAC1	Histone deacetylase 1	1	IACEEEFSDSEEEGEGGRK	IAC(UniMod:4)EEEFS(UniMod:21)DS(UniMod:21)EEEGEGGRK	3	IAC(UniMod:4)EEEFS(UniMod:21)DS(UniMod:21)EEEGEGGRK3	618706	540267	885162
Q9NQS7	Q9NQS7	INCE_HUMAN	INCENP	Inner centromere protein	1	IAQVSPGPR	IAQVS(UniMod:21)PGPR	2	IAQVS(UniMod:21)PGPR2	111637	143997
Q8WX93	Q8WX93;A0A3B3ISX8	PALLD_HUMAN	PALLD	Palladin	1	IASDEEIQGTK	IAS(UniMod:21)DEEIQGTK	2	IAS(UniMod:21)DEEIQGTK2	3.65491e+06	3.65643e+06	3.63743e+06
Q8TDD1	Q8TDD1	DDX54_HUMAN	DDX54	ATP-dependent RNA helicase DDX54	1	IDDRDSDEEGASDR	IDDRDS(UniMod:21)DEEGASDR	2	IDDRDS(UniMod:21)DEEGASDR2	809047	881180	772198
Q12888	Q12888;A6NNK5;C9JXV0	TP53B_HUMAN	TP53BP1	TP53-binding protein 1	1	IDEDGENTQIEDTEPMSPVLNSK	IDEDGENTQIEDTEPMS(UniMod:21)PVLNSK	3	IDEDGENTQIEDTEPMS(UniMod:21)PVLNSK3	823527	924747	798071
Q32MZ4	Q32MZ4	LRRF1_HUMAN	LRRFIP1	Leucine-rich repeat flightless-interacting protein 1	1	IDGATQSSPAEPK	IDGATQSS(UniMod:21)PAEPK	2	IDGATQSS(UniMod:21)PAEPK2	512542	510450	334197
Q9NYF8	Q9NYF8;A0A1W2PQ43;E9PK91;E9PK09;E9PKI6;E9PQN2	BCLF1_HUMAN	BCLAF1	Bcl-2-associated transcription factor 1	1	IDISPSTLR	IDIS(UniMod:21)PSTLR	2	IDIS(UniMod:21)PSTLR2	1.5272e+06	1.44198e+06	1.52863e+06
P08238	P08238;Q58FF8	HS90B_HUMAN	HSP90AB1	Heat shock protein HSP 90-beta	0	IEDVGSDEEDDSGK	IEDVGS(UniMod:21)DEEDDSGK	2	IEDVGS(UniMod:21)DEEDDSGK2	9.08543e+07	9.23311e+07	8.56534e+07
Q96T23	Q96T23	RSF1_HUMAN	RSF1	Remodeling and spacing factor 1	1	IESDEEEDFENVGK	IES(UniMod:21)DEEEDFENVGK	2	IES(UniMod:21)DEEEDFENVGK2	184301	238420	215497
P06493;P24941;Q00526	Q00526;P24941;P06493;G3V5T9;G3V317;E5RIU6;A0A024QZP7;E7ESI2	CDK1_HUMAN;CDK2_HUMAN;CDK3_HUMAN	CDK1;CDK2;CDK3	Cyclin-dependent kinase 1	0	IGEGTYGVVYK	IGEGT(UniMod:21)Y(UniMod:21)GVVYK	2	IGEGT(UniMod:21)Y(UniMod:21)GVVYK2	1.55017e+06	1.46224e+06	1.48562e+06
P06493;P24941;Q00526	Q00526;P24941;P06493;G3V5T9;G3V317;E5RIU6;A0A024QZP7;E7ESI2	CDK1_HUMAN;CDK2_HUMAN;CDK3_HUMAN	CDK1;CDK2;CDK3	Cyclin-dependent kinase 1	0	IGEGTYGVVYK	IGEGTY(UniMod:21)GVVYK	2	IGEGTY(UniMod:21)GVVYK2	858485	792437	710271
P61978	P61978;Q5T6W2	HNRPK_HUMAN	HNRNPK	Heterogeneous nuclear ribonucleoprotein K	1	IILDLISESPIK	IILDLISES(UniMod:21)PIK	2	IILDLISES(UniMod:21)PIK2	737472	664428	658238
Q9UJX5	Q9UJX5	APC4_HUMAN	ANAPC4	Anaphase-promoting complex subunit 4	1	IKEEVLSESEAENQQAGAAALAPEIVIK	IKEEVLS(UniMod:21)ESEAENQQAGAAALAPEIVIK	3	IKEEVLS(UniMod:21)ESEAENQQAGAAALAPEIVIK3	1.03381e+06	1.23175e+06	1.17267e+06
Q9UKN8	Q9UKN8	TF3C4_HUMAN	GTF3C4	General transcription factor 3C polypeptide 4	1	ILLVDSPGMGNADDEQQEEGTSSK	ILLVDS(UniMod:21)PGMGNADDEQQEEGTSSK	3	ILLVDS(UniMod:21)PGMGNADDEQQEEGTSSK3	426480	500557	468187
Q9Y657	Q9Y657	SPIN1_HUMAN	SPIN1	Spindlin-1	1	IMPDSNDSPPAEREPGEVVDSLVGK	IMPDSNDS(UniMod:21)PPAEREPGEVVDSLVGK	3	IMPDSNDS(UniMod:21)PPAEREPGEVVDSLVGK3		157153	250367
P41236;Q6NXS1	P41236;Q6NXS1;E7EMN6	IPP2B_HUMAN;IPP2_HUMAN	PPP1R2;PPP1R2B	Protein phosphatase inhibitor 2	0	IQEQESSGEEDSDLSPEER	IQEQES(UniMod:21)S(UniMod:21)GEEDSDLSPEER	3	IQEQES(UniMod:21)S(UniMod:21)GEEDSDLSPEER3	264542	223663	195523
P41236;Q6NXS1	P41236;Q6NXS1;E7EMN6	IPP2B_HUMAN;IPP2_HUMAN	PPP1R2;PPP1R2B	Protein phosphatase inhibitor 2	0	IQEQESSGEEDSDLSPEEREK	IQEQES(UniMod:21)S(UniMod:21)GEEDSDLSPEEREK	3	IQEQES(UniMod:21)S(UniMod:21)GEEDSDLSPEEREK3	1.42456e+06	1.24102e+06	1.14784e+06
P49674	P49674;H0Y682;H0Y5S9	KC1E_HUMAN	CSNK1E	Casein kinase I isoform epsilon	1	IQPAGNTSPR	IQPAGNTS(UniMod:21)PR	2	IQPAGNTS(UniMod:21)PR2	685364	576958	593614
Q96AT1	Q96AT1	K1143_HUMAN	KIAA1143	Uncharacterized protein KIAA1143	1	IQPQPPDEDGDHSDKEDEQPQVVVLK	IQPQPPDEDGDHS(UniMod:21)DKEDEQPQVVVLK	3	IQPQPPDEDGDHS(UniMod:21)DKEDEQPQVVVLK3	3.38989e+06	3.25966e+06	2.63581e+06
Q14432	Q14432	PDE3A_HUMAN	PDE3A	cGMP-inhibited 3',5'-cyclic phosphodiesterase A	1	ISPLSSPCSSPLQGTPASSLVSK	IS(UniMod:21)PLSSPC(UniMod:4)SSPLQGTPASSLVSK	3	IS(UniMod:21)PLSSPC(UniMod:4)SSPLQGTPASSLVSK3	546965	591326	590222
P55081	P55081	MFAP1_HUMAN	MFAP1	Microfibrillar-associated protein 1	1	IVEPEVVGESDSEVEGDAWR	IVEPEVVGES(UniMod:21)DS(UniMod:21)EVEGDAWR	3	IVEPEVVGES(UniMod:21)DS(UniMod:21)EVEGDAWR3	187070	148623	121251
O00264	O00264	PGRC1_HUMAN	PGRMC1	Membrane-associated progesterone receptor component 1	1	IVRGDQPAASGDSDDDEPPPLPR	IVRGDQPAASGDS(UniMod:21)DDDEPPPLPR	3	IVRGDQPAASGDS(UniMod:21)DDDEPPPLPR3	987681	912499	711200
Q13627;Q9Y463	Q13627;Q9Y463;A0A2R8YDF3;A0A2R8Y6L5;A0A2R8Y443;A0A2R8Y6I6	DYR1A_HUMAN;DYR1B_HUMAN	DYRK1A;DYRK1B	Dual specificity tyrosine-phosphorylation-regulated kinase 1A	0	IYQYIQSR	IYQY(UniMod:21)IQSR	2	IYQY(UniMod:21)IQSR2	631781	578787	647042
Q8IYB3	Q8IYB3;A9Z1X7	SRRM1_HUMAN	SRRM1	Serine/arginine repetitive matrix protein 1	1	KAASPSPQSVR	KAAS(UniMod:21)PS(UniMod:21)PQSVR	2	KAAS(UniMod:21)PS(UniMod:21)PQSVR2	1.13291e+06	1.01959e+06	978740
P80723	P80723;U3KQP0	BASP1_HUMAN	BASP1	Brain acid soluble protein 1	1	KAEGAATEEEGTPK	KAEGAATEEEGT(UniMod:21)PK	2	KAEGAATEEEGT(UniMod:21)PK2	783091	932536	691589
Q9NYF8	Q9NYF8;A0A1W2PQ43;E9PK91;E9PK09;E9PKI6;E9PJA7;E9PQN2	BCLF1_HUMAN	BCLAF1	Bcl-2-associated transcription factor 1	1	KAEGEPQEESPLK	KAEGEPQEES(UniMod:21)PLK	2	KAEGEPQEES(UniMod:21)PLK2	9.26602e+06	8.47351e+06	7.88478e+06
P13051	P13051;Q68DM5;F5GYA2	UNG_HUMAN	UNG	Uracil-DNA glycosylase	1	KAPAGQEEPGTPPSSPLSAEQLDR	KAPAGQEEPGT(UniMod:21)PPSS(UniMod:21)PLSAEQLDR	3	KAPAGQEEPGT(UniMod:21)PPSS(UniMod:21)PLSAEQLDR3	167517	131356	192181
P13051	P13051;Q68DM5;F5GYA2	UNG_HUMAN	UNG	Uracil-DNA glycosylase	1	KAPAGQEEPGTPPSSPLSAEQLDR	KAPAGQEEPGT(UniMod:21)PPSSPLSAEQLDR	3	KAPAGQEEPGT(UniMod:21)PPSSPLSAEQLDR3	512472	488303	405908
P35269	P35269;M0QXD6	T2FA_HUMAN	GTF2F1	General transcription factor IIF subunit 1	1	KAPTPQEK	KAPT(UniMod:21)PQEK	2	KAPT(UniMod:21)PQEK2	119467	195334
Q8IU81	Q8IU81	I2BP1_HUMAN	IRF2BP1	Interferon regulatory factor 2-binding protein 1	1	KASPEPEGEAAGK	KAS(UniMod:21)PEPEGEAAGK	2	KAS(UniMod:21)PEPEGEAAGK2	292193	263584	403697
Q9H1B7	Q9H1B7	I2BPL_HUMAN	IRF2BPL	Probable E3 ubiquitin-protein ligase IRF2BPL	1	KASPEPPDSAEGALK	KAS(UniMod:21)PEPPDSAEGALK	2	KAS(UniMod:21)PEPPDSAEGALK2	544545	539952	484378
O94874	O94874	UFL1_HUMAN	UFL1	E3 UFM1-protein ligase 1	1	KDDDSDDESQSSHTGK	KDDDS(UniMod:21)DDESQSSHTGK	3	KDDDS(UniMod:21)DDESQSSHTGK3	216120	243771	180191
Q9H1E3	Q9H1E3	NUCKS_HUMAN	NUCKS1	Nuclear ubiquitous casein and cyclin-dependent kinase substrate 1	1	KDDSHSAEDSEDEK	KDDSHS(UniMod:21)AEDS(UniMod:21)EDEK	2	KDDSHS(UniMod:21)AEDS(UniMod:21)EDEK2		645990	573096
F8WCI5;H7C4I0	H7C4I0;F8WCI5	F8WCI5_HUMAN;H7C4I0_HUMAN	C3orf33	Protein C3orf33	1	KDPPTSASR	KDPPT(UniMod:21)SASR	2	KDPPT(UniMod:21)SASR2	239320	270777	249178
Q96NB3	Q96NB3;J3QQQ3	ZN830_HUMAN	ZNF830	Zinc finger protein 830	1	KEEENADSDDEGELQDLLSQDWR	KEEENADS(UniMod:21)DDEGELQDLLSQDWR	3	KEEENADS(UniMod:21)DDEGELQDLLSQDWR3	313498	427980	380259
P78332	P78332;E9PGM9	RBM6_HUMAN	RBM6	RNA-binding protein 6	1	KEESPPPPK	KEES(UniMod:21)PPPPK	2	KEES(UniMod:21)PPPPK2	241303	328367	284910
Q9BQA1	Q9BQA1	MEP50_HUMAN	WDR77	Methylosome protein 50	1	KETPPPLVPPAAR	KET(UniMod:21)PPPLVPPAAR	2	KET(UniMod:21)PPPLVPPAAR2	469722	510918	441966
Q9NYF8	Q9NYF8;A0A1W2PQ43;E9PK91;E9PK09;E9PKI6;E9PQN2	BCLF1_HUMAN	BCLAF1	Bcl-2-associated transcription factor 1	1	KETQSPEQVK	KETQS(UniMod:21)PEQVK	2	KETQS(UniMod:21)PEQVK2	3.6369e+06	3.93972e+06	3.53766e+06
P35579	P35579;A0A8I5KWT8	MYH9_HUMAN	MYH9	Myosin-9	1	KGAGDGSDEEVDGK	KGAGDGS(UniMod:21)DEEVDGK	2	KGAGDGS(UniMod:21)DEEVDGK2	3.36511e+07	3.73119e+07	3.15309e+07
P35579	P35579;A0A8I5KWT8	MYH9_HUMAN	MYH9	Myosin-9	1	KGAGDGSDEEVDGK	KGAGDGS(UniMod:21)DEEVDGK	3	KGAGDGS(UniMod:21)DEEVDGK3	402351	361042
P51858	P51858	HDGF_HUMAN	HDGF	Hepatoma-derived growth factor	1	KGNAEGSSDEEGK	KGNAEGS(UniMod:21)S(UniMod:21)DEEGK	2	KGNAEGS(UniMod:21)S(UniMod:21)DEEGK2	984655	1.11437e+06	668362
O95400	O95400	CD2B2_HUMAN	CD2BP2	CD2 antigen cytoplasmic tail-binding protein 2	1	KGPGQPSSPQR	KGPGQPSS(UniMod:21)PQR	2	KGPGQPSS(UniMod:21)PQR2	231048	252423	230910
Q12982	Q12982;J3KN59	BNIP2_HUMAN	BNIP2	BCL2/adenovirus E1B 19 kDa protein-interacting protein 2	1	KGSITEYTAAEEK	KGS(UniMod:21)ITEYTAAEEK	2	KGS(UniMod:21)ITEYTAAEEK2	1.08728e+06	962423	1.06872e+06
Q7Z4S6	Q7Z4S6;A0A1B0GV47;H0YHT2;H0YI78	KI21A_HUMAN	KIF21A	Kinesin-like protein KIF21A	1	KIPEPSPVTR	KIPEPS(UniMod:21)PVTR	2	KIPEPS(UniMod:21)PVTR2	260859	309517	200379
Q9UHB6	Q9UHB6;F8VRN8;F8VQE1	LIMA1_HUMAN	LIMA1	LIM domain and actin-binding protein 1	1	KISENSYSLDDLEIGPGQLSSSTFDSEK	KIS(UniMod:21)ENSYSLDDLEIGPGQLSSSTFDSEK	3	KIS(UniMod:21)ENSYSLDDLEIGPGQLSSSTFDSEK3	1.60609e+06	1.87347e+06	1.76939e+06
Q13428	Q13428;E7ETY2;A0A6I8PRA0;A0A3B3IS06	TCOF_HUMAN	TCOF1	Treacle protein	1	KLSGDQPAAR	KLS(UniMod:21)GDQPAAR	2	KLS(UniMod:21)GDQPAAR2	397208	471814	433044
Q7Z4S6	Q7Z4S6;A0A1B0GV47;H0YIM6;H0YHT2	KI21A_HUMAN	KIF21A	Kinesin-like protein KIF21A	1	KLSSSDAPAQDTGSSAAAVETDASR	KLSSS(UniMod:21)DAPAQDTGSSAAAVETDASR	3	KLSSS(UniMod:21)DAPAQDTGSSAAAVETDASR3	483156	494910	475752
A0A0G2JJB9;Q5STZ8	Q8NE71;Q5STZ8;F5GYK6;A0A0G2JJB9	A0A0G2JJB9_HUMAN;Q5STZ8_HUMAN	ABCF1	ATP-binding cassette sub-family F member 1 (Fragment)	1	KLSVPTSDEEDEVPAPK	KLSVPT(UniMod:21)SDEEDEVPAPK	3	KLSVPT(UniMod:21)SDEEDEVPAPK3		193650	83818.5
Q8WVC0	Q8WVC0	LEO1_HUMAN	LEO1	RNA polymerase-associated protein LEO1	1	KLTSDEEGEPSGK	KLTS(UniMod:21)DEEGEPSGK	2	KLTS(UniMod:21)DEEGEPSGK2	1.4913e+06	1.27609e+06	1.22952e+06
Q14839	Q14839;A0A2U3TZM0;A0A2R8Y8C1;F5GWX5;A0A2R8YFK9;A0A2R8Y4X2;A0A2R8Y7I0;A0A2R8Y445;A0A2R8Y5M9;A0A2R8YER1;A0A2R8Y425;A0A2R8YE38;A0A2R8Y7M9;A0A2R8YD40;A0A2R8Y5J0;A0A2R8YDW2;A0A2R8YDJ9;A0A0C4DGG9;A0A2R8Y521;A0A2R8Y212;A0A2R8YFD8	CHD4_HUMAN	CHD4	Chromodomain-helicase-DNA-binding protein 4	1	KMSQPGSPSPK	KMS(UniMod:21)QPGS(UniMod:21)PSPK	2	KMS(UniMod:21)QPGS(UniMod:21)PSPK2	663894	520045	494520
P29692	P29692;E9PI39;E9PRY8;E9PK01;E9PQZ1;A0A087X1X7;E9PQ49;E9PL71	EF1D_HUMAN	EEF1D	Elongation factor 1-delta	1	KPATPAEDDEDDDIDLFGSDNEEEDK	KPAT(UniMod:21)PAEDDEDDDIDLFGS(UniMod:21)DNEEEDK	3	KPAT(UniMod:21)PAEDDEDDDIDLFGS(UniMod:21)DNEEEDK3	1.64597e+07	1.88328e+07	1.68118e+07
E9PL12	E9PL12	E9PL12_HUMAN	EEF1D	Elongation factor 1-delta (Fragment)	1	KPATPAEDDEDDDIDLFGSDNEEED	KPATPAEDDEDDDIDLFGS(UniMod:21)DNEEED	3	KPATPAEDDEDDDIDLFGS(UniMod:21)DNEEED3	1.28481e+06	1.23768e+06	1.52491e+06
P29692	P29692;E9PI39;E9PRY8;E9PK01;E9PQZ1;A0A087X1X7;E9PQ49;E9PL71	EF1D_HUMAN	EEF1D	Elongation factor 1-delta	1	KPATPAEDDEDDDIDLFGSDNEEEDK	KPATPAEDDEDDDIDLFGS(UniMod:21)DNEEEDK	3	KPATPAEDDEDDDIDLFGS(UniMod:21)DNEEEDK3	1.092e+08	1.88472e+08	1.13084e+08
Q8IYB3	Q8IYB3;A9Z1X7	SRRM1_HUMAN	SRRM1	Serine/arginine repetitive matrix protein 1	1	KPPAPPSPVQSQSPSTNWSPAVPVK	KPPAPPS(UniMod:21)PVQSQS(UniMod:21)PSTNWS(UniMod:21)PAVPVK	3	KPPAPPS(UniMod:21)PVQSQS(UniMod:21)PSTNWS(UniMod:21)PAVPVK3	1.22929e+06	1.22394e+06	1.28649e+06
Q8IYB3	Q8IYB3;A9Z1X7	SRRM1_HUMAN	SRRM1	Serine/arginine repetitive matrix protein 1	1	KPPAPPSPVQSQSPSTNWSPAVPVK	KPPAPPS(UniMod:21)PVQSQS(UniMod:21)PSTNWSPAVPVK	3	KPPAPPS(UniMod:21)PVQSQS(UniMod:21)PSTNWSPAVPVK3	2.70436e+06	2.74793e+06	2.17057e+06
Q13425	Q13425;H0YCS0;H7BY41	SNTB2_HUMAN	SNTB2	Beta-2-syntrophin	1	KPSLVSDLPWEGAAPQSPSFSGSEDSGSPK	KPSLVSDLPWEGAAPQSPSFSGSEDSGS(UniMod:21)PK	3	KPSLVSDLPWEGAAPQSPSFSGSEDSGS(UniMod:21)PK3	412163	474645	350019
O75909	O75909;G3V5E1	CCNK_HUMAN	CCNK	Cyclin-K	1	KPSPQPSSPR	KPSPQPSS(UniMod:21)PR	2	KPSPQPSS(UniMod:21)PR2			308733
E7ETY2	E7ETY2;A0A3B3IS06	E7ETY2_HUMAN	TCOF1	Treacle protein	1	KQEGPATQVDSAVGTLPATSPQSTSVQAK	KQEGPATQVDSAVGTLPAT(UniMod:21)SPQSTSVQAK	3	KQEGPATQVDSAVGTLPAT(UniMod:21)SPQSTSVQAK3	513484	537782	535501
Q9ULX6	Q9ULX6;A0A7P0TAE3;A0A7P0TAD3;A0A7P0T847;A0A7P0TAJ5;A0A7P0TBP0;A0A7P0T9N5;V9GZ50	AKP8L_HUMAN	AKAP8L	A-kinase anchor protein 8-like	1	KQGGSPDEPDSK	KQGGS(UniMod:21)PDEPDSK	2	KQGGS(UniMod:21)PDEPDSK2	109517	154976	151124
Q9H1E3	Q9H1E3	NUCKS_HUMAN	NUCKS1	Nuclear ubiquitous casein and cyclin-dependent kinase substrate 1	1	KTSTSPPPEK	KTSTS(UniMod:21)PPPEK	2	KTSTS(UniMod:21)PPPEK2	5.05491e+06	4.30424e+06	4.44183e+06
Q9P2E9	Q9P2E9;A2A2S5	RRBP1_HUMAN	RRBP1	Ribosome-binding protein 1	1	KVDTTPNQGK	KVDTT(UniMod:21)PNQGK	2	KVDTT(UniMod:21)PNQGK2	265715	225993	204632
Q9H3N1	Q9H3N1	TMX1_HUMAN	TMX1	Thioredoxin-related transmembrane protein 1	1	KVEEEQEADEEDVSEEEAESK	KVEEEQEADEEDVS(UniMod:21)EEEAESK	3	KVEEEQEADEEDVS(UniMod:21)EEEAESK3	53993.3	55698.7	61871.5
Q8IYB3	Q8IYB3;M0R088;A9Z1X7	SRRM1_HUMAN	SRRM1	Serine/arginine repetitive matrix protein 1	1	KVELSESEEDK	KVELS(UniMod:21)ES(UniMod:21)EEDK	2	KVELS(UniMod:21)ES(UniMod:21)EEDK2	7.45588e+06	7.10175e+06	6.31722e+06
P19338	P19338;A0A7I2V3F3;A0A7I2V349;H7BY16;A0A7I2V2S8;A0A7I2V5M5;A0A7I2V506;A0A7I2V2U7;C9JLB1;A0A7I2V699;A0A7I2V428	NUCL_HUMAN	NCL	Nucleolin	1	KVVVSPTK	KVVVS(UniMod:21)PTK	2	KVVVS(UniMod:21)PTK2	5.50372e+06	4.14954e+06	5.58492e+06
O60841	O60841;A0A087WUT6	IF2P_HUMAN	EIF5B	Eukaryotic translation initiation factor 5B	1	KWDGSEEDEDNSK	KWDGS(UniMod:21)EEDEDNSK	2	KWDGS(UniMod:21)EEDEDNSK2	798889	587622	505294
Q9UIG0	Q9UIG0	BAZ1B_HUMAN	BAZ1B	Tyrosine-protein kinase BAZ1B	1	LAEDEGDSEPEAVGQSR	LAEDEGDS(UniMod:21)EPEAVGQSR	3	LAEDEGDS(UniMod:21)EPEAVGQSR3	156010	259545	227672
Q14160	Q14160;A0A0G2JNZ2;A0A0G2JPP5;H0YCG0;A0A0G2JMS7;A0A669KB89	SCRIB_HUMAN	SCRIB	Protein scribble homolog	1	LALDGETLGEEEQEDEQPPWASPSPTSR	LALDGETLGEEEQEDEQPPWAS(UniMod:21)PSPTSR	3	LALDGETLGEEEQEDEQPPWAS(UniMod:21)PSPTSR3	285050	415924	303419
Q13428	Q13428;E7ETY2;A0A6I8PRA0;A0A3B3IS06	TCOF_HUMAN	TCOF1	Treacle protein	1	LDSSPSVSSTLAAK	LDSS(UniMod:21)PSVSSTLAAK	2	LDSS(UniMod:21)PSVSSTLAAK2	1.4344e+06	1.45931e+06	1.29333e+06
Q9Y294	Q9Y294	ASF1A_HUMAN	ASF1A	Histone chaperone ASF1A	1	LEDAESSNPNLQSLLSTDALPSASK	LEDAESS(UniMod:21)NPNLQSLLSTDALPSASK	3	LEDAESS(UniMod:21)NPNLQSLLSTDALPSASK3	1.10977e+06	1.09754e+06	1.21185e+06
Q8N163	Q8N163;G3V119;H0YB24	CCAR2_HUMAN	CCAR2	Cell cycle and apoptosis regulator protein 2	1	LEDSEVRSVASNQSEMEFSSLQDMPK	LEDS(UniMod:21)EVRSVAS(UniMod:21)NQSEMEFSSLQDMPK	3	LEDS(UniMod:21)EVRSVAS(UniMod:21)NQSEMEFSSLQDMPK3	294315	185103	307220
Q8N163	Q8N163;G3V119;H0YB24	CCAR2_HUMAN	CCAR2	Cell cycle and apoptosis regulator protein 2	1	LEDSEVRSVASNQSEMEFSSLQDMPK	LEDSEVRS(UniMod:21)VAS(UniMod:21)NQS(UniMod:21)EMEFSSLQDMPK	3	LEDSEVRS(UniMod:21)VAS(UniMod:21)NQS(UniMod:21)EMEFSSLQDMPK3	702952	807412	631704
O43719	O43719	HTSF1_HUMAN	HTATSF1	HIV Tat-specific factor 1	1	LFEDDDSNEK	LFEDDDS(UniMod:21)NEK	2	LFEDDDS(UniMod:21)NEK2	3.26764e+06	3.01748e+06	3.1534e+06
Q13428	Q13428;E7ETY2;A0A6I8PRA0;A0A3B3IS06	TCOF_HUMAN	TCOF1	Treacle protein	1	LGAGEGGEASVSPEK	LGAGEGGEASVS(UniMod:21)PEK	2	LGAGEGGEASVS(UniMod:21)PEK2	2.51209e+06	2.69392e+06	2.41113e+06
Q9UNE7	Q9UNE7;H3BS86	CHIP_HUMAN	STUB1	E3 ubiquitin-protein ligase CHIP	1	LGAGGGSPEK	LGAGGGS(UniMod:21)PEK	2	LGAGGGS(UniMod:21)PEK2	3.40144e+06	2.94994e+06	3.21513e+06
Q9Y4F1	Q9Y4F1;M0QYB0;A0A1B0GV68;C9JME2	FARP1_HUMAN	FARP1	FERM, ARHGEF and pleckstrin domain-containing protein 1	1	LGAPENSGISTLER	LGAPENSGIS(UniMod:21)TLER	2	LGAPENSGIS(UniMod:21)TLER2	1.4881e+06	1.48479e+06	1.46457e+06
P46821	P46821	MAP1B_HUMAN	MAP1B	Microtubule-associated protein 1B	1	LGDVSPTQIDVSQFGSFK	LGDVS(UniMod:21)PTQIDVSQFGSFK	3	LGDVS(UniMod:21)PTQIDVSQFGSFK3	156239		123191
Q15942	Q15942;H7C3D3;H0Y2Y8	ZYX_HUMAN	ZYX	Zyxin	1	LGHPEALSAGTGSPQPPSFTYAQQR	LGHPEALSAGT(UniMod:21)GSPQPPSFTYAQQR	3	LGHPEALSAGT(UniMod:21)GSPQPPSFTYAQQR3	538954	285244	370846
Q96T37	Q96T37;A0A494C001;A0A087WWP4;A0A499FJY3	RBM15_HUMAN	RBM15	RNA-binding protein 15	1	LHSYSSPSTK	LHSYSS(UniMod:21)PSTK	2	LHSYSS(UniMod:21)PSTK2	168947	156799	234942
P20700	Q03252;P20700	LMNB1_HUMAN	LMNB1	Lamin-B1	0	LKLSPSPSSR	LKLS(UniMod:21)PS(UniMod:21)PSSR	2	LKLS(UniMod:21)PS(UniMod:21)PSSR2	4.71801e+06	4.52654e+06	4.06655e+06
P20700	Q03252;P20700	LMNB1_HUMAN	LMNB1	Lamin-B1	0	LKLSPSPSSR	LKLS(UniMod:21)PSPSSR	2	LKLS(UniMod:21)PSPSSR2	1.52013e+06	1.83176e+06	1.59031e+06
P05783	P05783	K1C18_HUMAN	KRT18	Keratin, type I cytoskeletal 18	1	LLEDGEDFNLGDALDSSNSMQTIQK	LLEDGEDFNLGDALDSS(UniMod:21)NSMQTIQK	3	LLEDGEDFNLGDALDSS(UniMod:21)NSMQTIQK3	1.11764e+06	1.39698e+06	1.33303e+06
O60231	O60231;A0A140T947;A2AB15	DHX16_HUMAN	DHX16	Pre-mRNA-splicing factor ATP-dependent RNA helicase DHX16	1	LLEDSEESSEETVSR	LLEDS(UniMod:21)EES(UniMod:21)SEETVSR	2	LLEDS(UniMod:21)EES(UniMod:21)SEETVSR2	998208	1.07519e+06	975777
Q6NYC8	Q6NYC8;A0A0G2JHC2	PPR18_HUMAN	PPP1R18	Phostensin	1	LLESPGVEAGEGEAEK	LLES(UniMod:21)PGVEAGEGEAEK	2	LLES(UniMod:21)PGVEAGEGEAEK2	178090	167908	213704
Q9BW71	Q9BW71	HIRP3_HUMAN	HIRIP3	HIRA-interacting protein 3	1	LLGDSDSEEEQK	LLGDS(UniMod:21)DS(UniMod:21)EEEQK	2	LLGDS(UniMod:21)DS(UniMod:21)EEEQK2	973438	782417	750164
Q14676	Q14676	MDC1_HUMAN	MDC1	Mediator of DNA damage checkpoint protein 1	1	LLLAEDSEEEVDFLSER	LLLAEDS(UniMod:21)EEEVDFLSER	3	LLLAEDS(UniMod:21)EEEVDFLSER3	76229.3	41571	58439.3
Q8N6N3	Q8N6N3	CA052_HUMAN	C1orf52	UPF0690 protein C1orf52	1	LLPEGEETLESDDEKDEHTSK	LLPEGEET(UniMod:21)LESDDEKDEHTSK	3	LLPEGEET(UniMod:21)LESDDEKDEHTSK3	1.35174e+06	1.14784e+06	1.16842e+06
Q08499	Q08499;A0A1B0GW84;D6RHE0	PDE4D_HUMAN	PDE4D	cAMP-specific 3',5'-cyclic phosphodiesterase 4D	1	LMHSSSLTNSSIPR	LMHSS(UniMod:21)SLTNSSIPR	2	LMHSS(UniMod:21)SLTNSSIPR2		452098	362088
Q5T8P6	Q5T8P6;A0A087X0H9	RBM26_HUMAN	RBM26	RNA-binding protein 26	1	LNHSPPQSSSR	LNHS(UniMod:21)PPQSSSR	2	LNHS(UniMod:21)PPQSSSR2	316936	308984	313867
P36507	P36507;M0R1B6	MP2K2_HUMAN	MAP2K2	Dual specificity mitogen-activated protein kinase kinase 2	1	LNQPGTPTR	LNQPGT(UniMod:21)PTR	2	LNQPGT(UniMod:21)PTR2	1.1166e+06	1.18757e+06	1.13861e+06
Q08AD1	Q08AD1	CAMP2_HUMAN	CAMSAP2	Calmodulin-regulated spectrin-associated protein 2	1	LNQSSPDNVTDTK	LNQSS(UniMod:21)PDNVTDTK	2	LNQSS(UniMod:21)PDNVTDTK2		171321
Q9H4X1	Q9H4X1	RGCC_HUMAN	RGCC	Regulator of cell cycle RGCC	1	LNSPTDSTPALLSATVTPQK	LNSPT(UniMod:21)DSTPALLSATVTPQK	3	LNSPT(UniMod:21)DSTPALLSATVTPQK3	281375	249515	234531
P49792	P49792	RBP2_HUMAN	RANBP2	E3 SUMO-protein ligase RanBP2	1	LPPTFFCGVCSDTDEDNGNGEDFQSELQK	LPPTFFC(UniMod:4)GVC(UniMod:4)SDT(UniMod:21)DEDNGNGEDFQSELQK	3	LPPTFFC(UniMod:4)GVC(UniMod:4)SDT(UniMod:21)DEDNGNGEDFQSELQK3	244518	304132	450311
Q8WWI1	Q8WWI1;H0YDG6;E9PMS6;E9PMT2;F8WD26;A0A0A0MTE2;J3KP06;E9PMP7;H0Y424	LMO7_HUMAN	LMO7	LIM domain only protein 7	1	LPSPTSPFSSLSQDQAATSK	LPS(UniMod:21)PT(UniMod:21)SPFSSLSQDQAATSK	2	LPS(UniMod:21)PT(UniMod:21)SPFSSLSQDQAATSK2	60751.7	84017.5	79469.5
Q09666	Q09666	AHNK_HUMAN	AHNAK	Neuroblast differentiation-associated protein AHNAK	1	LPSGSGAASPTGSAVDIR	LPSGSGAAS(UniMod:21)PTGSAVDIR	2	LPSGSGAAS(UniMod:21)PTGSAVDIR2	296242
Q14247	Q14247;H0YEV2;H0YCD9	SRC8_HUMAN	CTTN	Src substrate cortactin	1	LPSSPVYEDAASFK	LPSS(UniMod:21)PVYEDAASFK	2	LPSS(UniMod:21)PVYEDAASFK2	3.95702e+06	4.25342e+06	3.73868e+06
Q92974	Q92974;V9GYM8;V9GYF0;A0A5F9ZI21	ARHG2_HUMAN	ARHGEF2	Rho guanine nucleotide exchange factor 2	1	LQDSSDPDTGSEEEGSSRLSPPHSPR	LQDSSDPDTGSEEEGSSRLS(UniMod:21)PPHSPR	3	LQDSSDPDTGSEEEGSSRLS(UniMod:21)PPHSPR3	388167	348804	386399
Q13610	Q13610	PWP1_HUMAN	PWP1	Periodic tryptophan protein 1 homolog	1	LQEEGGGSDEEETGSPSEDGMQSAR	LQEEGGGS(UniMod:21)DEEET(UniMod:21)GSPSEDGMQSAR	3	LQEEGGGS(UniMod:21)DEEET(UniMod:21)GSPSEDGMQSAR3	188130
Q13610	Q13610	PWP1_HUMAN	PWP1	Periodic tryptophan protein 1 homolog	1	LQEEGGGSDEEETGSPSEDGMQSAR	LQEEGGGS(UniMod:21)DEEETGSPSEDGMQSAR	3	LQEEGGGS(UniMod:21)DEEETGSPSEDGMQSAR3	2.21159e+06	1.90523e+06	1.85907e+06
Q9UKV3	Q9UKV3;A0A087WYN3;E7EQT4;S4R3H4	ACINU_HUMAN	ACIN1	Apoptotic chromatin condensation inducer in the nucleus	1	LQPERGSPK	LQPERGS(UniMod:21)PK	2	LQPERGS(UniMod:21)PK2	2.78118e+06	2.5734e+06	2.80174e+06
Q9H6F5	Q9H6F5	CCD86_HUMAN	CCDC86	Coiled-coil domain-containing protein 86	1	LQQGAGLESPQGQPEPGAASPQR	LQQGAGLESPQGQPEPGAAS(UniMod:21)PQR	3	LQQGAGLESPQGQPEPGAAS(UniMod:21)PQR3		182703
Q5JTV8	Q5JTV8;H0YD16;H0YDU3;A0A0A0MSK5;J3KN66	TOIP1_HUMAN	TOR1AIP1	Torsin-1A-interacting protein 1	1	LQQQHSEQPPLQPSPVMTR	LQQQHSEQPPLQPS(UniMod:21)PVMTR	3	LQQQHSEQPPLQPS(UniMod:21)PVMTR3	186412	212996	178752
O94979	O94979;D6REX3;H0Y8W8;H7BXG7	SC31A_HUMAN	SEC31A	Protein transport protein Sec31A	1	LREQTLSPTITSGLHNIAR	LREQTLS(UniMod:21)PTITSGLHNIAR	3	LREQTLS(UniMod:21)PTITSGLHNIAR3	229993	319313	278856
P02545	P02545;A0A6Q8PHQ9;Q3BDU5;A0A804HL68;Q5TCI8;A0A6Q8PFJ0	LMNA_HUMAN	LMNA	Prelamin-A/C	1	LRLSPSPTSQR	LRLS(UniMod:21)PS(UniMod:21)PTSQR	2	LRLS(UniMod:21)PS(UniMod:21)PTSQR2	5.37544e+07	5.12515e+07	4.73323e+07
P02545	P02545;A0A6Q8PHQ9;Q3BDU5;A0A804HL68;Q5TCI8;A0A6Q8PFJ0	LMNA_HUMAN	LMNA	Prelamin-A/C	1	LRLSPSPTSQR	LRLS(UniMod:21)PS(UniMod:21)PTSQR	3	LRLS(UniMod:21)PS(UniMod:21)PTSQR3	1.47319e+06	2.30019e+06	2.20125e+06
P02545	P02545;A0A6Q8PHQ9;Q3BDU5;A0A804HL68;Q5TCI8;A0A6Q8PFJ0	LMNA_HUMAN	LMNA	Prelamin-A/C	1	LRLSPSPTSQR	LRLS(UniMod:21)PSPTSQR	2	LRLS(UniMod:21)PSPTSQR2	2.15675e+07	2.273e+07	1.99422e+07
P02545	P02545;A0A6Q8PHQ9;Q3BDU5;A0A804HL68;Q5TCI8;A0A6Q8PFJ0	LMNA_HUMAN	LMNA	Prelamin-A/C	1	LSPSPTSQR	LSPS(UniMod:21)PTSQR	2	LSPS(UniMod:21)PTSQR2	1.81745e+07	1.64373e+07	1.62061e+07
Q16643	Q16643;D6RCR4;D6R9W4	DREB_HUMAN	DBN1	Drebrin	1	LSSPVLHR	LSS(UniMod:21)PVLHR	2	LSS(UniMod:21)PVLHR2	6.26283e+06	6.68837e+06	5.80911e+06
Q86UE4	Q86UE4;H0YB56;E5RJU9	LYRIC_HUMAN	MTDH	Protein LYRIC	1	LSSQISAGEEK	LSSQIS(UniMod:21)AGEEK	2	LSSQIS(UniMod:21)AGEEK2	1.44284e+06	1.63867e+06	1.50681e+06
Q13501	Q13501;E7EMC7	SQSTM_HUMAN	SQSTM1	Sequestosome-1	1	LTPVSPESSSTEEK	LTPVS(UniMod:21)PESSSTEEK	2	LTPVS(UniMod:21)PESSSTEEK2	1.41472e+06	1.46715e+06	1.33664e+06
P46100	P46100	ATRX_HUMAN	ATRX	Transcriptional regulator ATRX	1	LTPVSLSNSPIK	LTPVSLSNS(UniMod:21)PIK	2	LTPVSLSNS(UniMod:21)PIK2	394417	336138	348951
Q9UH99	Q9UH99;B0QY69;B0QY64;B0QY66;B0QY67;A0A8I5QKM0;B0QY63;B0QY68;B0QY60	SUN2_HUMAN	SUN2	SUN domain-containing protein 2	1	LTRYSQGDDDGSSSSGGSSVAGSQSTLFK	LTRYSQGDDDGSSSSGGS(UniMod:21)SVAGSQSTLFK	3	LTRYSQGDDDGSSSSGGS(UniMod:21)SVAGSQSTLFK3	225406	207783	142048
O43583	O43583;F8VVL1	DENR_HUMAN	DENR	Density-regulated protein	1	LTVENSPK	LTVENS(UniMod:21)PK	2	LTVENS(UniMod:21)PK2	484301	458200	429045
O43583	O43583;F8VVL1	DENR_HUMAN	DENR	Density-regulated protein	1	LTVENSPKQEAGISEGQGTAGEEEEK	LTVENS(UniMod:21)PKQEAGISEGQGTAGEEEEK	3	LTVENS(UniMod:21)PKQEAGISEGQGTAGEEEEK3	2.26899e+06	2.21368e+06	1.98277e+06
Q14160	Q14160;A0A0G2JNZ2;A0A0G2JPP5;H0YCG0;A0A0G2JMS7	SCRIB_HUMAN	SCRIB	Protein scribble homolog	1	MAESPCSPSGQQPPSPPSPDELPANVK	MAESPC(UniMod:4)SPSGQQPPSPPS(UniMod:21)PDELPANVK	3	MAESPC(UniMod:4)SPSGQQPPSPPS(UniMod:21)PDELPANVK3	139182		57252
Q16643	Q16643;D6R9Q9	DREB_HUMAN	DBN1	Drebrin	1	MAPTPIPTRSPSDSSTASTPVAEQIER	MAPTPIPT(UniMod:21)RSPSDSSTASTPVAEQIER	3	MAPTPIPT(UniMod:21)RSPSDSSTASTPVAEQIER3	1.40206e+06	1.6171e+06	1.35884e+06
Q96ST2	Q96ST2	IWS1_HUMAN	IWS1	Protein IWS1 homolog	1	MDSDEDEKEGEEEK	MDS(UniMod:21)DEDEKEGEEEK	2	MDS(UniMod:21)DEDEKEGEEEK2	213112
Q9NQC3	Q9NQC3	RTN4_HUMAN	RTN4	Reticulon-4	1	MEDLDQSPLVSSSDSPPRPQPAFK	MEDLDQS(UniMod:21)PLVSSSDS(UniMod:21)PPRPQPAFK	3	MEDLDQS(UniMod:21)PLVSSSDS(UniMod:21)PPRPQPAFK3	1.06766e+06	1.40588e+06	1.19464e+06
P06748	P06748;A0A7I2V579;A0A7I2V433;A0A7I2V4G8;A0A7I2V2X9;A0A7I2YQC0;A0A7I2V3U2;A0A7I2V5S2;A0A7I2V3G5	NPM_HUMAN	NPM1	Nucleophosmin	1	MEDSMDMDMSPLRPQNYLFGCELK	MEDS(UniMod:21)MDMDMSPLRPQNYLFGC(UniMod:4)ELK	3	MEDS(UniMod:21)MDMDMSPLRPQNYLFGC(UniMod:4)ELK3	128491	227215	139617
P55081	P55081	MFAP1_HUMAN	MFAP1	Microfibrillar-associated protein 1	1	MEREDSSEEEEEEIDDEEIER	MEREDS(UniMod:21)S(UniMod:21)EEEEEEIDDEEIER	3	MEREDS(UniMod:21)S(UniMod:21)EEEEEEIDDEEIER3	930418	849789	722116
P07910	P07910;G3V5V7;G3V2D6;G3V4C1;B4DY08;G3V4W0;G3V2Q1	HNRPC_HUMAN	HNRNPC	Heterogeneous nuclear ribonucleoproteins C1/C2	1	MESEGGADDSAEEGDLLDDDDNEDR	MESEGGADDS(UniMod:21)AEEGDLLDDDDNEDR	3	MESEGGADDS(UniMod:21)AEEGDLLDDDDNEDR3	108350	121653	101225
Q9UQ35	Q9UQ35;I3L3Q8	SRRM2_HUMAN	SRRM2	Serine/arginine repetitive matrix protein 2	1	MGQAPSQSLLPPAQDQPRSPVPSAFSDQSR	MGQAPSQSLLPPAQDQPRS(UniMod:21)PVPSAFSDQSR	3	MGQAPSQSLLPPAQDQPRS(UniMod:21)PVPSAFSDQSR3	2.03432e+06	2.09637e+06	1.9979e+06
O15446	O15446	RPA34_HUMAN	POLR1G	DNA-directed RNA polymerase I subunit RPA34	1	MPETVPQEEMPGPPLNSESGEEAPTGR	MPETVPQEEMPGPPLNSES(UniMod:21)GEEAPTGR	3	MPETVPQEEMPGPPLNSES(UniMod:21)GEEAPTGR3	369828	286816	323757
Q9H0D6	Q9H0D6	XRN2_HUMAN	XRN2	5'-3' exoribonuclease 2	1	MQNNSSPSISPNTSFTSDGSPSPLGGIK	MQNNS(UniMod:21)SPS(UniMod:21)ISPNTSFTSDGSPSPLGGIK	3	MQNNS(UniMod:21)SPS(UniMod:21)ISPNTSFTSDGSPSPLGGIK3	142908	92393.9	82142.3
Q14839	Q14839;A0A2U3TZM0;A0A2R8Y8C1;F5GWX5;A0A2R8YFK9;A0A2R8Y4X2;A0A2R8Y7I0;A0A2R8Y445;A0A2R8Y5M9;A0A2R8YER1;A0A2R8Y425;A0A2R8YE38;A0A2R8Y7M9;A0A2R8YD40;A0A2R8Y5J0;A0A2R8YDW2;A0A2R8YDJ9;A0A0C4DGG9;A0A2R8Y521;A0A2R8Y212;A0A2R8YFD8	CHD4_HUMAN	CHD4	Chromodomain-helicase-DNA-binding protein 4	1	MSQPGSPSPK	MSQPGS(UniMod:21)PSPK	2	MSQPGS(UniMod:21)PSPK2	1.09887e+06	926216	1.14998e+06
Q9UQ35	Q9UQ35;I3L3Q8	SRRM2_HUMAN	SRRM2	Serine/arginine repetitive matrix protein 2	1	MTSERAPSPSSR	MTSERAPS(UniMod:21)PSSR	2	MTSERAPS(UniMod:21)PSSR2	456111	248603
Q8WWM7	Q8WWM7;H3BUF6	ATX2L_HUMAN	ATXN2L	Ataxin-2-like protein	1	MYPPRSPK	MYPPRS(UniMod:21)PK	2	MYPPRS(UniMod:21)PK2	914181	792692	821957
Q7L1Q6	Q7L1Q6;H0Y503	5MP2_HUMAN	BZW1	eIF5-mimic protein 2	1	NAEEESESEAEEGD	NAEEES(UniMod:21)ES(UniMod:21)EAEEGD	2	NAEEES(UniMod:21)ES(UniMod:21)EAEEGD2	2.8349e+06	2.59744e+06	2.9167e+06
Q7L1Q6	Q7L1Q6;H0Y503	5MP2_HUMAN	BZW1	eIF5-mimic protein 2	1	NAEEESESEAEEGD	NAEEES(UniMod:21)ESEAEEGD	2	NAEEES(UniMod:21)ESEAEEGD2	1.07454e+06	1.27997e+06	1.46834e+06
Q6PKG0	Q6PKG0;A0A0B4J210;H0YBM7	LARP1_HUMAN	LARP1	La-related protein 1	1	NALPPVLTTVNGQSPPEHSAPAK	NALPPVLT(UniMod:21)TVNGQSPPEHSAPAK	3	NALPPVLT(UniMod:21)TVNGQSPPEHSAPAK3	736868	810916	715752
A0A0C4DG62;F8WEP2;H7BZV4	F8WEP2;H7BZV4;A0A0C4DG62	A0A0C4DG62_HUMAN;F8WEP2_HUMAN;H7BZV4_HUMAN	ARL6IP4	ADP-ribosylation factor-like protein 6-interacting protein 4	1	NCSASTSQER	NC(UniMod:4)SASTS(UniMod:21)QER	2	NC(UniMod:4)SASTS(UniMod:21)QER2	163031	183900	156337
Q14103	Q14103;D6RAF8;D6RD83	HNRPD_HUMAN	HNRNPD	Heterogeneous nuclear ribonucleoprotein D0	1	NEEDEGHSNSSPR	NEEDEGHSNSS(UniMod:21)PR	2	NEEDEGHSNSS(UniMod:21)PR2	9.41058e+06	9.22105e+06	1.04718e+07
Q9NR30	Q9NR30;A0A8I5KND9;A0A8I5KYZ4;A0A8I5KNN2;A0A8I5KNP3	DDX21_HUMAN	DDX21	Nucleolar RNA helicase 2	1	NEEPSEEEIDAPK	NEEPS(UniMod:21)EEEIDAPK	2	NEEPS(UniMod:21)EEEIDAPK2	350434	426282	430391
P67809	P67809;C9J5V9;H0Y449	YBOX1_HUMAN	YBX1	Y-box-binding protein 1	1	NEGSESAPEGQAQQR	NEGS(UniMod:21)ES(UniMod:21)APEGQAQQR	2	NEGS(UniMod:21)ES(UniMod:21)APEGQAQQR2	1.21404e+06	1.19751e+06	1.04208e+06
P67809	P67809;C9J5V9;H0Y449	YBOX1_HUMAN	YBX1	Y-box-binding protein 1	1	NEGSESAPEGQAQQR	NEGS(UniMod:21)ESAPEGQAQQR	2	NEGS(UniMod:21)ESAPEGQAQQR2	1.15835e+07	1.0173e+07	9.16007e+06
P11388	P11388	TOP2A_HUMAN	TOP2A	DNA topoisomerase 2-alpha	1	NENTEGSPQEDGVELEGLK	NENTEGS(UniMod:21)PQEDGVELEGLK	3	NENTEGS(UniMod:21)PQEDGVELEGLK3	211860	248724	135491
P22314	P22314;Q5JRS0;Q5JRS3;Q5JRR9;Q5JRS2;Q5JRS1	UBA1_HUMAN	UBA1	Ubiquitin-like modifier-activating enzyme 1	1	NGSEADIDEGLYSR	NGS(UniMod:21)EADIDEGLYSR	2	NGS(UniMod:21)EADIDEGLYSR2	156035	157336	104522
Q9BW71	Q9BW71	HIRP3_HUMAN	HIRIP3	HIRA-interacting protein 3	1	NGVAAEVSPAK	NGVAAEVS(UniMod:21)PAK	2	NGVAAEVS(UniMod:21)PAK2	591173	592595	592281
P49792	P49792	RBP2_HUMAN	RANBP2	E3 SUMO-protein ligase RanBP2	1	NHETDGGSAHGDDDDDGPHFEPVVPLPDK	NHET(UniMod:21)DGGSAHGDDDDDGPHFEPVVPLPDK	3	NHET(UniMod:21)DGGSAHGDDDDDGPHFEPVVPLPDK3	287140	451712	458946
Q14694	Q14694;H3BNA1	UBP10_HUMAN	USP10	Ubiquitin carboxyl-terminal hydrolase 10	1	NHSVNEEEQEEQGEGSEDEWEQVGPR	NHSVNEEEQEEQGEGS(UniMod:21)EDEWEQVGPR	3	NHSVNEEEQEEQGEGS(UniMod:21)EDEWEQVGPR3	1.16012e+06	880946	1.07925e+06
P15531	P15531	NDKA_HUMAN	NME1	Nucleoside diphosphate kinase A	1	NIIHGSDSVESAEK	NIIHGS(UniMod:21)DSVESAEK	2	NIIHGS(UniMod:21)DSVESAEK2	470959	492080	533100
Q32Q12	P22392;O60361;Q32Q12	Q32Q12_HUMAN	NME1-NME2	Nucleoside diphosphate kinase	0	NIIHGSDSVK	NIIHGSDS(UniMod:21)VK	2	NIIHGSDS(UniMod:21)VK2	442559	353664	438034
Q53TN4	Q53TN4	CYBR1_HUMAN	CYBRD1	Plasma membrane ascorbate-dependent reductase CYBRD1	1	NLALDEAGQRSTM	NLALDEAGQRST(UniMod:21)M	2	NLALDEAGQRST(UniMod:21)M2	338692	324018	247280
P53621	P53621;A0A3B3ITV3;A0A3B3IU78;A0A3B3ISK1;A0A3B3ISC6;A0A3B3IT15;A0A3B3IS84	COPA_HUMAN	COPA	Coatomer subunit alpha	1	NLSPGAVESDVR	NLS(UniMod:21)PGAVESDVR	2	NLS(UniMod:21)PGAVESDVR2	366714	264495	321111
Q7Z417	Q7Z417	NUFP2_HUMAN	NUFIP2	Nuclear fragile X mental retardation-interacting protein 2	1	NLSSDEATNPISR	NLS(UniMod:21)SDEATNPISR	2	NLS(UniMod:21)SDEATNPISR2	164533	135539	147554
Q9NYB9	Q9NYB9;E7EW77;A0A0C4DG21;F8WAL6;H0Y6B5;H7C3Q7;A0A7D9NKC8;E7EP65	ABI2_HUMAN	ABI2	Abl interactor 2	1	NMAPSQQSPVR	NMAPSQQS(UniMod:21)PVR	2	NMAPSQQS(UniMod:21)PVR2	90181.6	87753	76477.1
Q9C0C2	Q9C0C2	TB182_HUMAN	TNKS1BP1	182 kDa tankyrase-1-binding protein	1	NRSAEEGELAESK	NRS(UniMod:21)AEEGELAESK	2	NRS(UniMod:21)AEEGELAESK2	1.35061e+06	1.09347e+06	1.14962e+06
Q9H0D6	Q9H0D6	XRN2_HUMAN	XRN2	5'-3' exoribonuclease 2	1	NSPGSQVASNPR	NS(UniMod:21)PGSQVASNPR	2	NS(UniMod:21)PGSQVASNPR2	315080	250814	298080
Q9UK76	Q9UK76;J3KSH8;J3KT51	JUPI1_HUMAN	JPT1	Jupiter microtubule associated homolog 1	1	NSSEASSGDFLDLK	NS(UniMod:21)SEASSGDFLDLK	2	NS(UniMod:21)SEASSGDFLDLK2	600876	680666	620378
Q9H1E3	Q9H1E3	NUCKS_HUMAN	NUCKS1	Nuclear ubiquitous casein and cyclin-dependent kinase substrate 1	1	NSQEDSEDSEDK	NSQEDS(UniMod:21)EDS(UniMod:21)EDK	2	NSQEDS(UniMod:21)EDS(UniMod:21)EDK2	1.24255e+06	1.58603e+06	1.28451e+06
Q9H1E3	Q9H1E3	NUCKS_HUMAN	NUCKS1	Nuclear ubiquitous casein and cyclin-dependent kinase substrate 1	1	NSQEDSEDSEDK	NSQEDS(UniMod:21)EDSEDK	2	NSQEDS(UniMod:21)EDSEDK2	775427	948545	564421
Q9NYV4	Q9NYV4;J3QSD7	CDK12_HUMAN	CDK12	Cyclin-dependent kinase 12	1	NSSPAPPQPAPGK	NSS(UniMod:21)PAPPQPAPGK	2	NSS(UniMod:21)PAPPQPAPGK2	713087	729296	763799
P51858	P51858	HDGF_HUMAN	HDGF	Hepatoma-derived growth factor	1	NSTPSEPGSGRGPPQEEEEEEDEEEEATK	NST(UniMod:21)PSEPGSGRGPPQEEEEEEDEEEEATK	3	NST(UniMod:21)PSEPGSGRGPPQEEEEEEDEEEEATK3	507639	433554
P13807	P13807	GYS1_HUMAN	GYS1	Glycogen [starch] synthase, muscle	1	NSVDTATSSSLSTPSEPLSPTSSLGEERN	NSVDTATSSSLSTPSEPLS(UniMod:21)PTSSLGEERN	3	NSVDTATSSSLSTPSEPLS(UniMod:21)PTSSLGEERN3	490935	709813	651697
Q9P2E9	Q9P2E9;V9GY78	RRBP1_HUMAN	RRBP1	Ribosome-binding protein 1	1	NTDVAQSPEAPK	NTDVAQS(UniMod:21)PEAPK	2	NTDVAQS(UniMod:21)PEAPK2	97229.3
Q13427	Q13427;A0A7I2V629;E9PG73;C9JM79;A0A7I2V4F2;A0A7I2V5Q5	PPIG_HUMAN	PPIG	Peptidyl-prolyl cis-trans isomerase G	1	NVSESPNRK	NVSES(UniMod:21)PNRK	2	NVSES(UniMod:21)PNRK2	418936	402242	396630
O60271	O60271	JIP4_HUMAN	SPAG9	C-Jun-amino-terminal kinase-interacting protein 4	1	NVSTGSAENEEK	NVSTGS(UniMod:21)AENEEK	2	NVSTGS(UniMod:21)AENEEK2	2.80344e+06	3.06936e+06	2.47344e+06
P67809	P67809;C9J5V9;H0Y449	YBOX1_HUMAN	YBX1	Y-box-binding protein 1	1	NYQQNYQNSESGEK	NYQQNYQNS(UniMod:21)ESGEK	2	NYQQNYQNS(UniMod:21)ESGEK2	5.48002e+06	5.13802e+06	4.82855e+06
F8W7E0	A0A6Q8PGN6;F8W7E0;E9PSG1	F8W7E0_HUMAN	CAST	Calpastatin (Fragment)	1	PAASPRPR	PAAS(UniMod:21)PRPR	2	PAAS(UniMod:21)PRPR2	4.55287e+06	4.40008e+06	4.10464e+06
P53396	P53396	ACLY_HUMAN	ACLY	ATP-citrate synthase	1	PAMPQDSVPSPR	PAMPQDSVPS(UniMod:21)PR	2	PAMPQDSVPS(UniMod:21)PR2	697585	652584	688170
Q9Y618	Q9Y618;C9J7T7;C9J0Q5;A0A384DVL6;C9JQE8;C9JE98	NCOR2_HUMAN	NCOR2	Nuclear receptor corepressor 2	1	PAPPAPPPPQNLQPESDAPQQPGSSPR	PAPPAPPPPQNLQPESDAPQQPGSS(UniMod:21)PR	3	PAPPAPPPPQNLQPESDAPQQPGSS(UniMod:21)PR3	562418	578128	584556
Q96JM3	Q96JM3	CHAP1_HUMAN	CHAMP1	Chromosome alignment-maintaining phosphoprotein 1	1	PAPVSPESVK	PAPVS(UniMod:21)PESVK	2	PAPVS(UniMod:21)PESVK2	188975	163624	179011
P29692	P29692;E9PI39;E9PRY8;E9PK01;E9PQZ1;A0A087X1X7;E9PQ49;E9PL71	EF1D_HUMAN	EEF1D	Elongation factor 1-delta	1	PATPAEDDEDDDIDLFGSDNEEEDK	PATPAEDDEDDDIDLFGS(UniMod:21)DNEEEDK	3	PATPAEDDEDDDIDLFGS(UniMod:21)DNEEEDK3	2.51036e+06	2.74141e+06	2.65031e+06
P08651	P08651;A0A286YEX4	NFIC_HUMAN	NFIC	Nuclear factor 1 C-type	1	PATTSEGGATSPTSPSYSPPDTSPANR	PATTSEGGATSPTSPS(UniMod:21)YSPPDTSPANR	3	PATTSEGGATSPTSPS(UniMod:21)YSPPDTSPANR3	50520.4		50633.6
H0YNJ9	H0YNJ9	H0YNJ9_HUMAN	DUT	Deoxyuridine 5'-triphosphate nucleotidohydrolase	1	PCSEETPAISPSK	PC(UniMod:4)SEETPAIS(UniMod:21)PSK	2	PC(UniMod:4)SEETPAIS(UniMod:21)PSK2	1.43419e+06	1.28863e+06	867220
O15173	O15173;U3KQM0;U3KPU8	PGRC2_HUMAN	PGRMC2	Membrane-associated progesterone receptor component 2	1	PGEEPSEYTDEEDTK	PGEEPSEYT(UniMod:21)DEEDTK	2	PGEEPSEYT(UniMod:21)DEEDTK2	3.41752e+06	3.36711e+06	3.04384e+06
Q9UPT8	Q9UPT8;M0QY97	ZC3H4_HUMAN	ZC3H4	Zinc finger CCCH domain-containing protein 4	1	PGPAEAPSPTASPSGDASPPATAPYDPR	PGPAEAPSPTASPS(UniMod:21)GDAS(UniMod:21)PPATAPYDPR	3	PGPAEAPSPTASPS(UniMod:21)GDAS(UniMod:21)PPATAPYDPR3	439397	336516	331883
P08238	P08238;Q58FF8	HS90B_HUMAN	HSP90AB1	Heat shock protein HSP 90-beta	0	PKIEDVGSDEEDDSGK	PKIEDVGS(UniMod:21)DEEDDSGK	2	PKIEDVGS(UniMod:21)DEEDDSGK2	456854	581228	367946
P49916	P49916;K7ENR9;K7ERZ5	DNLI3_HUMAN	LIG3	DNA ligase 3	1	PNNSGEAPSSPTPK	PNNSGEAPSS(UniMod:21)PTPK	2	PNNSGEAPSS(UniMod:21)PTPK2	232134	225964	141798
Q6VMQ6	Q6VMQ6	MCAF1_HUMAN	ATF7IP	Activating transcription factor 7-interacting protein 1	1	PNNVPSVPSPSIQR	PNNVPSVPSPS(UniMod:21)IQR	2	PNNVPSVPSPS(UniMod:21)IQR2	23143.8
Q86VM9	Q86VM9;E7ERS3	ZCH18_HUMAN	ZC3H18	Zinc finger CCCH domain-containing protein 18	1	PRSPQPPSR	PRS(UniMod:21)PQPPSR	2	PRS(UniMod:21)PQPPSR2	1.83569e+06	1.85334e+06	1.7389e+06
Q15366	Q15366;H3BSS4	PCBP2_HUMAN	PCBP2	Poly(rC)-binding protein 2	1	PSSSPVIFAGGQDR	PSSS(UniMod:21)PVIFAGGQDR	2	PSSS(UniMod:21)PVIFAGGQDR2	1.02268e+06	1.11535e+06	1.14193e+06
Q9H0G5	Q9H0G5	NSRP1_HUMAN	NSRP1	Nuclear speckle splicing regulatory protein 1	1	PSVFGNDSDDDDETSVSESLQR	PSVFGNDS(UniMod:21)DDDDETSVSESLQR	3	PSVFGNDS(UniMod:21)DDDDETSVSESLQR3	1.15085e+06	1.24257e+06	1.11906e+06
Q96FS4	Q96FS4;F6RY50	SIPA1_HUMAN	SIPA1	Signal-induced proliferation-associated protein 1	1	PSVPSADSETPLTQDRPGSPSGSEDK	PSVPSADSETPLTQDRPGS(UniMod:21)PSGSEDK	3	PSVPSADSETPLTQDRPGS(UniMod:21)PSGSEDK3	884519	719854	666454
P27816	P27816;A0A804HKE7;E7EVA0;H7C456;A0A0J9YW37	MAP4_HUMAN	MAP4	Microtubule-associated protein 4	1	PTLLANGGHGVEGSDTTGSPTEFLEEK	PTLLANGGHGVEGSDTTGS(UniMod:21)PTEFLEEK	3	PTLLANGGHGVEGSDTTGS(UniMod:21)PTEFLEEK3	718765	725106	831568
Q9UK76	Q9UK76	JUPI1_HUMAN	JPT1	Jupiter microtubule associated homolog 1	1	PVPAAPVPSPVAPAPVPSR	PVPAAPVPS(UniMod:21)PVAPAPVPSR	3	PVPAAPVPS(UniMod:21)PVAPAPVPSR3	77050.7	96640.1	49474.7
Q8NC44	Q8NC44;H7C3D5	RETR2_HUMAN	RETREG2	Reticulophagy regulator 2	1	QALDSEEEEEDVAAK	QALDS(UniMod:21)EEEEEDVAAK	2	QALDS(UniMod:21)EEEEEDVAAK2	184888		231397
Q8TAD8	Q8TAD8	SNIP1_HUMAN	SNIP1	Smad nuclear-interacting protein 1	1	QERLSPEVAPPAHR	QERLS(UniMod:21)PEVAPPAHR	3	QERLS(UniMod:21)PEVAPPAHR3	686987	750855	724669
Q04695	Q04695	K1C17_HUMAN	KRT17	Keratin, type I cytoskeletal 17	1	QFTSSSSIK	QFTSSSS(UniMod:21)IK	2	QFTSSSS(UniMod:21)IK2	1.12487e+06	1.21342e+06	1.17748e+06
P46821	P46821	MAP1B_HUMAN	MAP1B	Microtubule-associated protein 1B	1	QGSPDQVSPVSEMTSTSLYQDK	QGSPDQVS(UniMod:21)PVSEMTSTSLYQDK	3	QGSPDQVS(UniMod:21)PVSEMTSTSLYQDK3	224917	189410	132242
Q15365	Q15365	PCBP1_HUMAN	PCBP1	Poly(rC)-binding protein 1	1	QICLVMLETLSQSPQGR	QIC(UniMod:4)LVMLETLSQS(UniMod:21)PQGR	3	QIC(UniMod:4)LVMLETLSQS(UniMod:21)PQGR3	453174	468545	520553
O15027	O15027;A0A3F2YNZ0;F1T0I1;A0A3F2YNX0;A0A8I5KPG1	SC16A_HUMAN	SEC16A	Protein transport protein Sec16A	1	QIDSSPVGGETDETTVSQNYR	QIDSS(UniMod:21)PVGGETDETTVSQNYR	3	QIDSS(UniMod:21)PVGGETDETTVSQNYR3		90451.6	62305.3
Q3KQU3	Q3KQU3;C9JIR3;D3DPS3;E9PLH3	MA7D1_HUMAN	MAP7D1	MAP7 domain-containing protein 1	1	QLPLEPESPSGQVGPRPAPPQEESPSSEAK	QLPLEPESPSGQVGPRPAPPQEES(UniMod:21)PSSEAK	3	QLPLEPESPSGQVGPRPAPPQEES(UniMod:21)PSSEAK3	261402
B5ME19;Q99613	Q99613;B5ME19;H3BPE3	EIF3C_HUMAN;EIFCL_HUMAN	EIF3C;EIF3CL	Eukaryotic translation initiation factor 3 subunit C-like protein	0	QNPEQSADEDAEK	QNPEQS(UniMod:21)ADEDAEK	2	QNPEQS(UniMod:21)ADEDAEK2	704458	743566	656667
Q96AE4	Q96AE4	FUBP1_HUMAN	FUBP1	Far upstream element-binding protein 1	1	QQAAYYAQTSPQGMPQHPPAPQGQ	QQAAY(UniMod:21)YAQTSPQGMPQHPPAPQGQ	3	QQAAY(UniMod:21)YAQTSPQGMPQHPPAPQGQ3	549510	529508	558939
Q9UHB6	Q9UHB6;F8VS07;F8VQE1	LIMA1_HUMAN	LIMA1	LIM domain and actin-binding protein 1	1	QQSPQEPK	QQS(UniMod:21)PQEPK	2	QQS(UniMod:21)PQEPK2	934140	1.01097e+06	1.09387e+06
Q9H1E3	Q9H1E3	NUCKS_HUMAN	NUCKS1	Nuclear ubiquitous casein and cyclin-dependent kinase substrate 1	1	QREMLMEDVGSEEEQEEEDEAPFQEK	QREMLMEDVGS(UniMod:21)EEEQEEEDEAPFQEK	3	QREMLMEDVGS(UniMod:21)EEEQEEEDEAPFQEK3	568567	631340	639226
O60841	O60841;A0A087WUT6	IF2P_HUMAN	EIF5B	Eukaryotic translation initiation factor 5B	1	QSFDDNDSEELEDK	QSFDDNDS(UniMod:21)EELEDK	2	QSFDDNDS(UniMod:21)EELEDK2	435435	744256	540999
O75475	O75475	PSIP1_HUMAN	PSIP1	PC4 and SFRS1-interacting protein	1	QSNASSDVEVEEK	QSNASS(UniMod:21)DVEVEEK	2	QSNASS(UniMod:21)DVEVEEK2	2.35172e+06	2.33326e+06	2.50474e+06
P51858	P51858	HDGF_HUMAN	HDGF	Hepatoma-derived growth factor	1	RAGDLLEDSPK	RAGDLLEDS(UniMod:21)PK	2	RAGDLLEDS(UniMod:21)PK2	2.03391e+07	1.83759e+07	1.6246e+07
P16949	P16949;A2A2D0	STMN1_HUMAN	STMN1	Stathmin	1	RASGQAFELILSPR	RAS(UniMod:21)GQAFELILSPR	3	RAS(UniMod:21)GQAFELILSPR3	351883	300560	335180
Q8IYB3	Q8IYB3;M0R088;A9Z1X7	SRRM1_HUMAN	SRRM1	Serine/arginine repetitive matrix protein 1	1	RASPSPPPK	RAS(UniMod:21)PS(UniMod:21)PPPK	2	RAS(UniMod:21)PS(UniMod:21)PPPK2		1.33534e+06
P16949	P16949;A2A2D0	STMN1_HUMAN	STMN1	Stathmin	1	RASGQAFELILSPR	RASGQAFELILS(UniMod:21)PR	3	RASGQAFELILS(UniMod:21)PR3	542727	309524	470709
Q9NRG0	Q9NRG0;H0YBP8	CHRC1_HUMAN	CHRAC1	Chromatin accessibility complex protein 1	1	REEDEENDNDNESDHDEADS	REEDEENDNDNES(UniMod:21)DHDEADS	3	REEDEENDNDNES(UniMod:21)DHDEADS3	267714	191540	251233
Q8IYB3	Q8IYB3;M0R088;A9Z1X7	SRRM1_HUMAN	SRRM1	Serine/arginine repetitive matrix protein 1	1	RESPSPAPK	RES(UniMod:21)PS(UniMod:21)PAPK	2	RES(UniMod:21)PS(UniMod:21)PAPK2	1.69378e+06	1.79683e+06	1.55857e+06
Q92688	Q92688	AN32B_HUMAN	ANP32B	Acidic leucine-rich nuclear phosphoprotein 32 family member B	1	RETDDEGEDD	RET(UniMod:21)DDEGEDD	2	RET(UniMod:21)DDEGEDD2	103530	138851	90999.6
Q13501	Q13501;D6RBF1;E3W990;C9J6J8;E7EMC7	SQSTM_HUMAN	SQSTM1	Sequestosome-1	1	RFSFCCSPEPEAEAEAAAGPGPCER	RFSFC(UniMod:4)C(UniMod:4)S(UniMod:21)PEPEAEAEAAAGPGPC(UniMod:4)ER	3	RFSFC(UniMod:4)C(UniMod:4)S(UniMod:21)PEPEAEAEAAAGPGPC(UniMod:4)ER3	80313.9		83122.8
Q96QR8	Q96QR8	PURB_HUMAN	PURB	Transcriptional activator protein Pur-beta	1	RGGGSGGGEESEGEEVDED	RGGGSGGGEES(UniMod:21)EGEEVDED	2	RGGGSGGGEES(UniMod:21)EGEEVDED2	1.0652e+06	1.22558e+06	979788
P49736	P49736;C9J013;F8WDM3;C9JZ21	MCM2_HUMAN	MCM2	DNA replication licensing factor MCM2	1	RGNDPLTSSPGR	RGNDPLTSS(UniMod:21)PGR	2	RGNDPLTSS(UniMod:21)PGR2	2.17811e+06	2.19988e+06	2.08854e+06
E7EX44	E7EX44	E7EX44_HUMAN	CALD1	Caldesmon	1	RGSIGENQGEEK	RGS(UniMod:21)IGENQGEEK	2	RGS(UniMod:21)IGENQGEEK2	870023	816187	782639
Q6NZI2	Q6NZI2	CAVN1_HUMAN	CAVIN1	Caveolae-associated protein 1	1	RGSSPDVHALLEITEESDAVLVDK	RGS(UniMod:21)S(UniMod:21)PDVHALLEITEESDAVLVDK	3	RGS(UniMod:21)S(UniMod:21)PDVHALLEITEESDAVLVDK3	174556		81900.8
P42694	P42694;J3QS41	HELZ_HUMAN	HELZ	Probable helicase with zinc finger domain	1	RISSSSVQPCSEEVSTPQDSLAQCK	RIS(UniMod:21)SSSVQPC(UniMod:4)SEEVSTPQDSLAQC(UniMod:4)K	3	RIS(UniMod:21)SSSVQPC(UniMod:4)SEEVSTPQDSLAQC(UniMod:4)K3	114612	123366	151002
P05783	P05783	K1C18_HUMAN	KRT18	Keratin, type I cytoskeletal 18	1	RLLEDGEDFNLGDALDSSNSMQTIQK	RLLEDGEDFNLGDALDSSNS(UniMod:21)MQTIQK	3	RLLEDGEDFNLGDALDSSNS(UniMod:21)MQTIQK3	198025	231211	284690
Q8IYB3	Q8IYB3;M0R088;A9Z1X7	SRRM1_HUMAN	SRRM1	Serine/arginine repetitive matrix protein 1	1	RLSPSASPPR	RLS(UniMod:21)PS(UniMod:21)AS(UniMod:21)PPR	2	RLS(UniMod:21)PS(UniMod:21)AS(UniMod:21)PPR2	3.38768e+06	2.92721e+06	2.54617e+06
Q9UKV3	Q9UKV3;E7EQT4;S4R3H4	ACINU_HUMAN	ACIN1	Apoptotic chromatin condensation inducer in the nucleus	1	RLSQPESAEK	RLS(UniMod:21)QPESAEK	2	RLS(UniMod:21)QPESAEK2	231618	302699
Q9UK76	Q9UK76;J3KSH8;J3KT51	JUPI1_HUMAN	JPT1	Jupiter microtubule associated homolog 1	1	RNSSEASSGDFLDLK	RNS(UniMod:21)SEASSGDFLDLK	3	RNS(UniMod:21)SEASSGDFLDLK3	7.28474e+06	6.38933e+06	5.14102e+06
Q9H7L9	Q9H7L9	SDS3_HUMAN	SUDS3	Sin3 histone deacetylase corepressor complex component SDS3	1	RPASPSSPEHLPATPAESPAQR	RPASPS(UniMod:21)S(UniMod:21)PEHLPATPAESPAQR	3	RPASPS(UniMod:21)S(UniMod:21)PEHLPATPAESPAQR3	1.19391e+06	1.27113e+06	1.11858e+06
P55081	P55081	MFAP1_HUMAN	MFAP1	Microfibrillar-associated protein 1	1	RPDYAPMESSDEEDEEFQFIK	RPDYAPMES(UniMod:21)S(UniMod:21)DEEDEEFQFIK	3	RPDYAPMES(UniMod:21)S(UniMod:21)DEEDEEFQFIK3	382631	477724	356014
Q8N3X1	Q8N3X1;F5GXL1	FNBP4_HUMAN	FNBP4	Formin-binding protein 4	1	RPILQLSPPGPR	RPILQLS(UniMod:21)PPGPR	3	RPILQLS(UniMod:21)PPGPR3	484580	475464	405641
Q12996	Q12996;H0YE74;E9PLP8	CSTF3_HUMAN	CSTF3	Cleavage stimulation factor subunit 3	1	RPNEDSDEDEEK	RPNEDS(UniMod:21)DEDEEK	2	RPNEDS(UniMod:21)DEDEEK2	1.51296e+06	1.64542e+06	1.48187e+06
Q01082	Q01082;A0A087WUZ3	SPTB2_HUMAN	SPTBN1	Spectrin beta chain, non-erythrocytic 1	1	RPPSPEPSTK	RPPS(UniMod:21)PEPSTK	2	RPPS(UniMod:21)PEPSTK2	3.11422e+06	3.35745e+06	3.30853e+06
Q01105	Q01105;A0A8I5KS71;A0A8I5KTZ2	SET_HUMAN	SET	Protein SET	1	RQSPLPPQK	RQS(UniMod:21)PLPPQK	2	RQS(UniMod:21)PLPPQK2	8.616e+06	8.36463e+06	7.15699e+06
O00193	O00193;E9PM92;E9PQA1	SMAP_HUMAN	SMAP	Small acidic protein	0	RSASPDDDLGSSNWEAADLGNEER	RS(UniMod:21)ASPDDDLGSSNWEAADLGNEER	3	RS(UniMod:21)ASPDDDLGSSNWEAADLGNEER3	341063	283799	217051
Q05193	Q05193;A0A0D9SFB1;A0A0D9SFE4;A0A0U1RQP1	DYN1_HUMAN	DNM1	Dynamin-1	1	RSPTSSPTPQR	RS(UniMod:21)PTSS(UniMod:21)PTPQR	2	RS(UniMod:21)PTSS(UniMod:21)PTPQR2	857686	805871	1.00248e+06
P25205	P25205;J3KQ69;Q7Z6P5;A0A499FHX9	MCM3_HUMAN	MCM3	DNA replication licensing factor MCM3	1	RSEDESETEDEEEK	RSEDES(UniMod:21)ET(UniMod:21)EDEEEK	2	RSEDES(UniMod:21)ET(UniMod:21)EDEEEK2	990966	820450	962119
P25205	P25205;J3KQ69;Q7Z6P5;A0A499FHX9	MCM3_HUMAN	MCM3	DNA replication licensing factor MCM3	1	RSEDESETEDEEEK	RSEDES(UniMod:21)ETEDEEEK	2	RSEDES(UniMod:21)ETEDEEEK2	584766	459440	457160
P49736	P49736;C9J013;F8WDM3;C9JZ21	MCM2_HUMAN	MCM2	DNA replication licensing factor MCM2	1	RTDALTSSPGR	RTDALTSS(UniMod:21)PGR	2	RTDALTSS(UniMod:21)PGR2		388333
Q15435	Q15435;C9JRC4;H7C118;B5MBZ8;C9JD73;H7C003	PP1R7_HUMAN	PPP1R7	Protein phosphatase 1 regulatory subunit 7	1	RVESEESGDEEGK	RVES(UniMod:21)EES(UniMod:21)GDEEGK	2	RVES(UniMod:21)EES(UniMod:21)GDEEGK2	587077	515463	551076
Q9UQ35	Q9UQ35	SRRM2_HUMAN	SRRM2	Serine/arginine repetitive matrix protein 2	1	RVPSPTPAPK	RVPS(UniMod:21)PTPAPK	2	RVPS(UniMod:21)PTPAPK2	3.40175e+06	2.95652e+06	2.89171e+06
P13861	P13861	KAP2_HUMAN	PRKAR2A	cAMP-dependent protein kinase type II-alpha regulatory subunit	1	RVSVCAETYNPDEEEEDTDPR	RVS(UniMod:21)VC(UniMod:4)AETYNPDEEEEDTDPR	3	RVS(UniMod:21)VC(UniMod:4)AETYNPDEEEEDTDPR3	1.12691e+06	1.03883e+06	1.15616e+06
Q8IYB3	Q8IYB3;M0R088;A9Z1X7	SRRM1_HUMAN	SRRM1	Serine/arginine repetitive matrix protein 1	1	RYSPPIQR	RYS(UniMod:21)PPIQR	2	RYS(UniMod:21)PPIQR2	5.57438e+06	5.33768e+06	5.57527e+06
Q8IYB3	Q8IYB3;M0R088;A9Z1X7	SRRM1_HUMAN	SRRM1	Serine/arginine repetitive matrix protein 1	1	RYSPSPPPK	RYS(UniMod:21)PS(UniMod:21)PPPK	2	RYS(UniMod:21)PS(UniMod:21)PPPK2	5.96696e+06	5.36953e+06	4.98015e+06
Q01831	Q01831	XPC_HUMAN	XPC	DNA repair protein complementing XP-C cells	1	SEAAAPHTDAGGGLSSDEEEGTSSQAEAAR	S(UniMod:21)EAAAPHTDAGGGLSSDEEEGTSSQAEAAR	3	S(UniMod:21)EAAAPHTDAGGGLSSDEEEGTSSQAEAAR3	65487
Q02880	Q02880	TOP2B_HUMAN	TOP2B	DNA topoisomerase 2-beta	1	SEDDSAKFDSNEEDSASVFSPSFGLK	S(UniMod:21)EDDSAKFDS(UniMod:21)NEEDSASVFSPSFGLK	3	S(UniMod:21)EDDSAKFDS(UniMod:21)NEEDSASVFSPSFGLK3	148327	199337	99536.3
Q09666	Q09666	AHNK_HUMAN	AHNAK	Neuroblast differentiation-associated protein AHNAK	1	SEDGVEGDLGETQSR	S(UniMod:21)EDGVEGDLGETQSR	2	S(UniMod:21)EDGVEGDLGETQSR2	140549	148214	106523
P10412	P10412	H14_HUMAN	H1-4	Histone H1.4	1	SETAPAAPAAPAPAEK	S(UniMod:21)ET(UniMod:21)APAAPAAPAPAEK	2	S(UniMod:21)ET(UniMod:21)APAAPAAPAPAEK2	2.15243e+06	2.03328e+06	1.73178e+06
Q9H1E3	Q9H1E3	NUCKS_HUMAN	NUCKS1	Nuclear ubiquitous casein and cyclin-dependent kinase substrate 1	1	SGDEGSEDEAPSGED	S(UniMod:21)GDEGS(UniMod:21)EDEAPSGED	2	S(UniMod:21)GDEGS(UniMod:21)EDEAPSGED2	416522	318546	328345
Q12888	Q12888;A6NNK5	TP53B_HUMAN	TP53BP1	TP53-binding protein 1	1	SKLPDGPTGSSEEEEEFLEIPPFNK	S(UniMod:21)KLPDGPTGSSEEEEEFLEIPPFNK	3	S(UniMod:21)KLPDGPTGSSEEEEEFLEIPPFNK3			144264
O60832	O60832;C9IYT0;H7C0M1;H7C2Q9	DKC1_HUMAN	DKC1	H/ACA ribonucleoprotein complex subunit DKC1	1	SLPEEDVAEIQHAEEFLIKPESK	S(UniMod:21)LPEEDVAEIQHAEEFLIKPESK	3	S(UniMod:21)LPEEDVAEIQHAEEFLIKPESK3	419663	311835	302052
Q6PKG0	Q6PKG0;A0A0B4J210;E5RH50;A0A8I5KWU3;H0YC33;A0A8I5KSP1	LARP1_HUMAN	LARP1	La-related protein 1	1	SLPTTVPESPNYR	S(UniMod:21)LPTTVPES(UniMod:21)PNYR	2	S(UniMod:21)LPTTVPES(UniMod:21)PNYR2	586877	690501	479579
Q13185	Q13185;S4R2Y4	CBX3_HUMAN	CBX3	Chromobox protein homolog 3	1	SLSDSESDDSK	S(UniMod:21)LS(UniMod:21)DSESDDSK	2	S(UniMod:21)LS(UniMod:21)DSESDDSK2	931311	798879	710255
Q9UQ35	Q9UQ35;I3L4D8;I3L182	SRRM2_HUMAN	SRRM2	Serine/arginine repetitive matrix protein 2	1	SLSGSSPCPK	S(UniMod:21)LS(UniMod:21)GSSPC(UniMod:4)PK	2	S(UniMod:21)LS(UniMod:21)GSSPC(UniMod:4)PK2	293599	296041	205476
Q13523	Q13523	PRP4B_HUMAN	PRPF4B	Serine/threonine-protein kinase PRP4 homolog	1	SLSPKPR	S(UniMod:21)LS(UniMod:21)PKPR	2	S(UniMod:21)LS(UniMod:21)PKPR2		278447	353313
Q9UQ35	Q9UQ35	SRRM2_HUMAN	SRRM2	Serine/arginine repetitive matrix protein 2	1	SLTRSPPAIR	S(UniMod:21)LTRS(UniMod:21)PPAIR	2	S(UniMod:21)LTRS(UniMod:21)PPAIR2	1.35195e+06	1.19094e+06	1.11719e+06
Q99549	Q99549	MPP8_HUMAN	MPHOSPH8	M-phase phosphoprotein 8	1	SPDDLKK	S(UniMod:21)PDDLKK	2	S(UniMod:21)PDDLKK2		131620	73653.4
Q96N64	Q96N64	PWP2A_HUMAN	PWWP2A	PWWP domain-containing protein 2A	1	SPEAVGPELEAEEK	S(UniMod:21)PEAVGPELEAEEK	2	S(UniMod:21)PEAVGPELEAEEK2	271369	313343	207353
Q9NYF8	Q9NYF8;Q9Y2W1;A0A1W2PQ43;E9PK91;E9PKI6;A0A3B3ITZ9;E9PQN2	BCLF1_HUMAN	BCLAF1	Bcl-2-associated transcription factor 1	0	SPEIHRR	S(UniMod:21)PEIHRR	2	S(UniMod:21)PEIHRR2	766940	895862	876814
Q12888	Q12888;A6NNK5;C9JXV0	TP53B_HUMAN	TP53BP1	TP53-binding protein 1	1	SPEPEVLSTQEDLFDQSNK	S(UniMod:21)PEPEVLSTQEDLFDQSNK	3	S(UniMod:21)PEPEVLSTQEDLFDQSNK3	25292.1	274825	111883
Q9NWH9	Q9NWH9;H7C3F4	SLTM_HUMAN	SLTM	SAFB-like transcription modulator	1	SPGHMVILDQTK	S(UniMod:21)PGHMVILDQTK	2	S(UniMod:21)PGHMVILDQTK2	1.80794e+06	2.10773e+06	1.73992e+06
Q9Y618	Q9Y618;C9J7T7;C9J0Q5;H7C184;A0A384DVL6;C9JE98	NCOR2_HUMAN	NCOR2	Nuclear receptor corepressor 2	1	SPGNTSQPPAFFSK	S(UniMod:21)PGNTSQPPAFFSK	2	S(UniMod:21)PGNTSQPPAFFSK2	711922	791108	668112
A0A2R8Y4Z8	Q9Y3X0;A0A2R8Y4Z8;M0QYB4	A0A2R8Y4Z8_HUMAN	CCDC9	Coiled-coil domain-containing protein 9	1	SPGTPRPPGASK	S(UniMod:21)PGTPRPPGASK	2	S(UniMod:21)PGTPRPPGASK2	258679
Q9H4L4	Q9H4L4;A0A087X0R7	SENP3_HUMAN	SENP3	Sentrin-specific protease 3	0	SPLDPDSGLLSCTLPNGFGGQSGPEGER	S(UniMod:21)PLDPDSGLLSC(UniMod:4)TLPNGFGGQSGPEGER	3	S(UniMod:21)PLDPDSGLLSC(UniMod:4)TLPNGFGGQSGPEGER3	355977	470037	442284
Q9Y2W1	Q9Y2W1;A0A3B3ITZ9	TR150_HUMAN	THRAP3	Thyroid hormone receptor-associated protein 3	1	SPPSTGSTYGSSQK	S(UniMod:21)PPSTGSTYGSSQK	2	S(UniMod:21)PPSTGSTYGSSQK2	177760		141978
Q8IYB3	Q8IYB3;M0R088;A9Z1X7	SRRM1_HUMAN	SRRM1	Serine/arginine repetitive matrix protein 1	1	SPSPAPPPR	S(UniMod:21)PS(UniMod:21)PAPPPR	2	S(UniMod:21)PS(UniMod:21)PAPPPR2	184567	59870.7
P46821	P46821	MAP1B_HUMAN	MAP1B	Microtubule-associated protein 1B	1	SPSDSGYSYETIGK	S(UniMod:21)PSDSGYSYETIGK	2	S(UniMod:21)PSDSGYSYETIGK2	1.67461e+06	1.76114e+06	1.48685e+06
Q96CX2	Q96CX2	KCD12_HUMAN	KCTD12	BTB/POZ domain-containing protein KCTD12	1	SPSGGAAGPLLTPSQSLDGSRR	S(UniMod:21)PSGGAAGPLLTPSQSLDGSRR	3	S(UniMod:21)PSGGAAGPLLTPSQSLDGSRR3	503833	464095	468100
Q8WX93	Q8WX93	PALLD_HUMAN	PALLD	Palladin	1	SPSGHPHVR	S(UniMod:21)PSGHPHVR	2	S(UniMod:21)PSGHPHVR2	496930	419732	492229
O00499	O00499	BIN1_HUMAN	BIN1	Myc box-dependent-interacting protein 1	1	SPSPPDGSPAATPEIR	S(UniMod:21)PSPPDGSPAATPEIR	2	S(UniMod:21)PSPPDGSPAATPEIR2	350865	275834	247332
Q9NP74	Q9NP74;S4R313	PALMD_HUMAN	PALMD	Palmdelphin	1	SPTEYHEPVYANPFYRPTTPQR	S(UniMod:21)PTEYHEPVYANPFYRPTTPQR	3	S(UniMod:21)PTEYHEPVYANPFYRPTTPQR3	1.61404e+06	1.75963e+06	1.65645e+06
Q9NVD7	Q9NVD7	PARVA_HUMAN	PARVA	Alpha-parvin	1	SPTPKSPPSR	S(UniMod:21)PTPKS(UniMod:21)PPSR	2	S(UniMod:21)PTPKS(UniMod:21)PPSR2	687040	691445	700693
Q9C0C2	Q9C0C2;A0A2R8Y5C4	TB182_HUMAN	TNKS1BP1	182 kDa tankyrase-1-binding protein	1	SQEADVQDWEFR	S(UniMod:21)QEADVQDWEFR	2	S(UniMod:21)QEADVQDWEFR2	205461	197952	197720
Q9UKJ3	Q9UKJ3	GPTC8_HUMAN	GPATCH8	G patch domain-containing protein 8	1	SQSPHYFR	S(UniMod:21)QSPHYFR	2	S(UniMod:21)QSPHYFR2	239529	237931	239861
Q9UQ35	Q9UQ35	SRRM2_HUMAN	SRRM2	Serine/arginine repetitive matrix protein 2	1	SRSPLAIR	S(UniMod:21)RS(UniMod:21)PLAIR	2	S(UniMod:21)RS(UniMod:21)PLAIR2	1.91286e+06	1.44086e+06
Q8IYB3	Q8IYB3;M0R088;A9Z1X7	SRRM1_HUMAN	SRRM1	Serine/arginine repetitive matrix protein 1	1	SRSPSPAPEK	S(UniMod:21)RS(UniMod:21)PS(UniMod:21)PAPEK	2	S(UniMod:21)RS(UniMod:21)PS(UniMod:21)PAPEK2	2.59208e+06	2.27288e+06	2.29911e+06
Q9UQ35	Q9UQ35	SRRM2_HUMAN	SRRM2	Serine/arginine repetitive matrix protein 2	1	SRTPPTSR	S(UniMod:21)RT(UniMod:21)PPTSR	2	S(UniMod:21)RT(UniMod:21)PPTSR2	2.18451e+06		2.05657e+06
Q9UQ35	Q9UQ35	SRRM2_HUMAN	SRRM2	Serine/arginine repetitive matrix protein 2	1	SRTPPVTR	S(UniMod:21)RT(UniMod:21)PPVTR	2	S(UniMod:21)RT(UniMod:21)PPVTR2	1.93517e+06		1.83917e+06
Q14166	Q14166	TTL12_HUMAN	TTLL12	Tubulin--tyrosine ligase-like protein 12	1	SSPGQTPEEGAQALAEFAALHGPALR	S(UniMod:21)SPGQTPEEGAQALAEFAALHGPALR	3	S(UniMod:21)SPGQTPEEGAQALAEFAALHGPALR3	1.52124e+06	1.69911e+06	1.77237e+06
P17096	P17096;A0A669KAX1;A0A1W2PRV2	HMGA1_HUMAN	HMGA1	High mobility group protein HMG-I/HMG-Y	0	SSQPLASK	S(UniMod:21)SQPLASK	2	S(UniMod:21)SQPLASK2	137459	147570	107456
O14874	O14874;H3BTL2;H3BS02;H3BQP2;H3BNP3	BCKD_HUMAN	BCKDK	[3-methyl-2-oxobutanoate dehydrogenase [lipoamide]] kinase, mitochondrial	1	STSATDTHHVEMAR	S(UniMod:21)TSATDTHHVEMAR	3	S(UniMod:21)TSATDTHHVEMAR3	454710	413253	376791
Q9UQ35	Q9UQ35;I3L4D8;I3L182	SRRM2_HUMAN	SRRM2	Serine/arginine repetitive matrix protein 2	1	SVSPCSNVESR	S(UniMod:21)VS(UniMod:21)PC(UniMod:4)SNVESR	2	S(UniMod:21)VS(UniMod:21)PC(UniMod:4)SNVESR2	1.11685e+06	944872	840641
P05787	P05787;F8W1U3;F8VQY3;F8VUG2	K2C8_HUMAN	KRT8	Keratin, type II cytoskeletal 8	1	SYTSGPGSR	S(UniMod:21)YTSGPGSR	2	S(UniMod:21)YTSGPGSR2	3.74308e+06	3.55182e+06	3.59072e+06
Q96N64	Q96N64	PWP2A_HUMAN	PWWP2A	PWWP domain-containing protein 2A	1	SAGEAPSENQSPSK	SAGEAPSENQS(UniMod:21)PSK	2	SAGEAPSENQS(UniMod:21)PSK2			65608.2
Q8ND76	Q8ND76	CCNY_HUMAN	CCNY	Cyclin-Y	1	SASADNLTLPR	SAS(UniMod:21)ADNLTLPR	2	SAS(UniMod:21)ADNLTLPR2	178251	195766	185934
P10398	P04049;P10398;A0A8I5KQV4;A0A8I5KSV6;A0A8I5KSB0;A0A8I5KWF7;A0A0S2Z4L5;H7C155;A0A8I5QKZ6;A0A8I5KTA5	ARAF_HUMAN	ARAF	Serine/threonine-protein kinase A-Raf	0	SASEPSLHR	SAS(UniMod:21)EPSLHR	2	SAS(UniMod:21)EPSLHR2	1.2116e+06	1.07138e+06	1.16962e+06
O00193	O00193;E9PM92;E9PQA1	SMAP_HUMAN	SMAP	Small acidic protein	0	SASPDDDLGSSNWEAADLGNEERK	SAS(UniMod:21)PDDDLGSSNWEAADLGNEERK	3	SAS(UniMod:21)PDDDLGSSNWEAADLGNEERK3	6.34891e+06	7.90262e+06	5.07463e+06
Q86VQ1	Q86VQ1;H7C0Q2	GLCI1_HUMAN	GLCCI1	Glucocorticoid-induced transcript 1 protein	1	SASWGSADQLK	SAS(UniMod:21)WGSADQLK	2	SAS(UniMod:21)WGSADQLK2	99265.2
Q8TEA8	Q8TEA8	DTD1_HUMAN	DTD1	D-aminoacyl-tRNA deacylase 1	1	SASSGAEGDVSSEREP	SASS(UniMod:21)GAEGDVSSEREP	2	SASS(UniMod:21)GAEGDVSSEREP2	391489	261548	279648
P82094	P82094;A0A2R8Y7M0;F8WF45	TMF1_HUMAN	TMF1	TATA element modulatory factor	1	SATPVNCEQPDILVSSTPINEGQTVLDK	SAT(UniMod:21)PVNC(UniMod:4)EQPDILVSSTPINEGQTVLDK	3	SAT(UniMod:21)PVNC(UniMod:4)EQPDILVSSTPINEGQTVLDK3	392504	437877	366479
Q9UQ35	Q9UQ35;I3L4D8;I3L182;I3L1I8	SRRM2_HUMAN	SRRM2	Serine/arginine repetitive matrix protein 2	1	SATRPSPSPER	SATRPS(UniMod:21)PS(UniMod:21)PER	2	SATRPS(UniMod:21)PS(UniMod:21)PER2	3.84184e+06	3.41455e+06	3.56822e+06
Q15149	Q15149;A0A8I5KYZ1;A0A8I5KSD5;E9PMV1;A0A8I5KUE3;H0YDN1	PLEC_HUMAN	PLEC	Plectin	1	SDEGQLSPATR	SDEGQLS(UniMod:21)PATR	2	SDEGQLS(UniMod:21)PATR2	300252	344757	327128
Q9NRX5	Q9NRX5	SERC1_HUMAN	SERINC1	Serine incorporator 1	1	SDGSLEDGDDVHR	SDGS(UniMod:21)LEDGDDVHR	2	SDGS(UniMod:21)LEDGDDVHR2	202018	210975	191758
P46821	P46821	MAP1B_HUMAN	MAP1B	Microtubule-associated protein 1B	1	SDISPLTPR	SDISPLT(UniMod:21)PR	2	SDISPLT(UniMod:21)PR2	177890	77994
Q01831	Q01831	XPC_HUMAN	XPC	DNA repair protein complementing XP-C cells	1	SEAAAPHTDAGGGLSSDEEEGTSSQAEAAR	SEAAAPHTDAGGGLS(UniMod:21)S(UniMod:21)DEEEGTSSQAEAAR	3	SEAAAPHTDAGGGLS(UniMod:21)S(UniMod:21)DEEEGTSSQAEAAR3	1.89733e+06	2.03267e+06	2.07971e+06
O15234	O15234;K7EQ38;J3KSY7	CASC3_HUMAN	CASC3	Protein CASC3	1	SEANDAVNSSTK	SEANDAVNSS(UniMod:21)TK	2	SEANDAVNSS(UniMod:21)TK2	163366		229684
Q9UQ35	Q9UQ35	SRRM2_HUMAN	SRRM2	Serine/arginine repetitive matrix protein 2	1	SECDSSPEPK	SEC(UniMod:4)DS(UniMod:21)SPEPK	2	SEC(UniMod:4)DS(UniMod:21)SPEPK2	194130		143854
P33991	P33991;A0A3B3ITP6;E5RFR3;E5RG53;A0A3B3IS57;A0A3B3IT92	MCM4_HUMAN	MCM4	DNA replication licensing factor MCM4	1	SEDARSSPSQR	SEDARSS(UniMod:21)PSQR	2	SEDARSS(UniMod:21)PSQR2	791487	1.31592e+06	1.25508e+06
Q12888	Q12888;A6NNK5	TP53B_HUMAN	TP53BP1	TP53-binding protein 1	1	SEDPPTTPIRGNLLHFPSSQGEEEK	SEDPPT(UniMod:21)TPIRGNLLHFPSSQGEEEK	3	SEDPPT(UniMod:21)TPIRGNLLHFPSSQGEEEK3	358233	380351	358650
P07910	P07910;G3V5V7;G3V2D6;G3V4C1;B4DY08;G3V4W0;G3V2Q1	HNRPC_HUMAN	HNRNPC	Heterogeneous nuclear ribonucleoproteins C1/C2	1	SEEEQSSSSVKK	SEEEQSSS(UniMod:21)SVKK	2	SEEEQSSS(UniMod:21)SVKK2	340542	378652	364555
Q5JTV8	Q5JTV8;H0YD16;A0A0A0MSK5;J3KN66	TOIP1_HUMAN	TOR1AIP1	Torsin-1A-interacting protein 1	1	SELGNQSPSTSSR	SELGNQS(UniMod:21)PSTSSR	2	SELGNQS(UniMod:21)PSTSSR2	178932	183887	162373
P46821	P46821	MAP1B_HUMAN	MAP1B	Microtubule-associated protein 1B	1	SEQSSMSIEFGQESPEQSLAMDFSR	SEQSSMSIEFGQES(UniMod:21)PEQSLAMDFSR	3	SEQSSMSIEFGQES(UniMod:21)PEQSLAMDFSR3	141831	120735	236617
P09651	P09651;F8W6I7;A0A7I2V3R8;F8VTQ5;A0A7I2V3W0;F8W646;A0A7I2V2L6;A0A7I2YQ85	ROA1_HUMAN	HNRNPA1	Heterogeneous nuclear ribonucleoprotein A1	1	SESPKEPEQLR	SES(UniMod:21)PKEPEQLR	2	SES(UniMod:21)PKEPEQLR2		1.43827e+06	1.5115e+06
O94875	O94875;H7BXR3;H7BZX1;H7BZK1;H7C1R7	SRBS2_HUMAN	SORBS2	Sorbin and SH3 domain-containing protein 2	1	SFTSSSPSSPSR	SFTSSSPSS(UniMod:21)PSR	2	SFTSSSPSS(UniMod:21)PSR2	398568	475147	417565
P18615	P18615;A0A0G2JI50;A0A0A0MSN9;E9PD43;A0A0A0MT02	NELFE_HUMAN	NELFE	Negative elongation factor E	1	SGAHSSASPPR	SGAHSS(UniMod:21)ASPPR	2	SGAHSS(UniMod:21)ASPPR2		299725	231361
P02545	P02545;A0A6Q8PHQ9;Q3BDU5;A0A6Q8PFM1;A0A804HL68;A0A6Q8PFJ0;A0A6Q8PF80;A0A6Q8PF59;A0A6Q8PGH0;A0A6Q8PFF5	LMNA_HUMAN	LMNA	Prelamin-A/C	1	SGAQASSTPLSPTR	SGAQASSTPLS(UniMod:21)PTR	2	SGAQASSTPLS(UniMod:21)PTR2	4.22147e+06	4.39499e+06	4.18984e+06
Q9H1E3	Q9H1E3	NUCKS_HUMAN	NUCKS1	Nuclear ubiquitous casein and cyclin-dependent kinase substrate 1	1	SGDEGSEDEAPSGED	SGDEGS(UniMod:21)EDEAPS(UniMod:21)GED	2	SGDEGS(UniMod:21)EDEAPS(UniMod:21)GED2	711976	591784	576593
P85037	P85037	FOXK1_HUMAN	FOXK1	Forkhead box protein K1	1	SGGLQTPECLSREGSPIPHDPEFGSK	SGGLQT(UniMod:21)PEC(UniMod:4)LS(UniMod:21)REGS(UniMod:21)PIPHDPEFGSK	3	SGGLQT(UniMod:21)PEC(UniMod:4)LS(UniMod:21)REGS(UniMod:21)PIPHDPEFGSK3	774686	884611	926811
P85037	P85037	FOXK1_HUMAN	FOXK1	Forkhead box protein K1	1	SGGLQTPECLSREGSPIPHDPEFGSK	SGGLQTPEC(UniMod:4)LS(UniMod:21)REGS(UniMod:21)PIPHDPEFGSK	3	SGGLQTPEC(UniMod:4)LS(UniMod:21)REGS(UniMod:21)PIPHDPEFGSK3	280264	284278	334793
Q9H1E3	Q9H1E3	NUCKS_HUMAN	NUCKS1	Nuclear ubiquitous casein and cyclin-dependent kinase substrate 1	1	SGKNSQEDSEDSEDK	SGKNS(UniMod:21)QEDSEDSEDK	2	SGKNS(UniMod:21)QEDSEDSEDK2	137184	197526	165394
Q9Y618	Q9Y618;C9J7T7;C9J0Q5;A0A384DVL6;C9JE98	NCOR2_HUMAN	NCOR2	Nuclear receptor corepressor 2	1	SGLEPASSPSK	SGLEPAS(UniMod:21)SPSK	2	SGLEPAS(UniMod:21)SPSK2	193115	189236	181353
Q53EL6	Q53EL6;Q5VZS7	PDCD4_HUMAN	PDCD4	Programmed cell death protein 4	1	SGLTVPTSPK	SGLTVPTS(UniMod:21)PK	2	SGLTVPTS(UniMod:21)PK2	5.80922e+06	5.54077e+06	5.44217e+06
Q92685	Q92685;H7C0X4;F8WF93;F8WE30;H7BZZ2	ALG3_HUMAN	ALG3	Dol-P-Man:Man(5)GlcNAc(2)-PP-Dol alpha-1,3-mannosyltransferase	1	SGSAAQAEGLCK	SGS(UniMod:21)AAQAEGLC(UniMod:4)K	2	SGS(UniMod:21)AAQAEGLC(UniMod:4)K2	308142	285448	303624
Q07666	Q07666	KHDR1_HUMAN	KHDRBS1	KH domain-containing, RNA-binding, signal transduction-associated protein 1	1	SGSMDPSGAHPSVR	SGS(UniMod:21)MDPSGAHPSVR	2	SGS(UniMod:21)MDPSGAHPSVR2	1.14471e+06	1.03628e+06	1.09874e+06
P08651	P08651;A0A286YEX4	NFIC_HUMAN	NFIC	Nuclear factor 1 C-type	1	SGSMEEDVDTSPGGDYYTSPSSPTSSSR	SGSMEEDVDTSPGGDYYTSPSS(UniMod:21)PTSSSR	3	SGSMEEDVDTSPGGDYYTSPSS(UniMod:21)PTSSSR3	160017	154832	117784
Q8N556	Q8N556	AFAP1_HUMAN	AFAP1	Actin filament-associated protein 1	1	SGTSSPQSPVFR	SGTSSPQS(UniMod:21)PVFR	2	SGTSSPQS(UniMod:21)PVFR2	1.62341e+06	1.58149e+06	1.55014e+06
P98082	P98082	DAB2_HUMAN	DAB2	Disabled homolog 2	1	SGVDQMDLFGDMSTPPDLNSPTESK	SGVDQMDLFGDMSTPPDLNS(UniMod:21)PTESK	3	SGVDQMDLFGDMSTPPDLNS(UniMod:21)PTESK3	401663	433830	404132
Q12872	Q12872	SFSWA_HUMAN	SFSWAP	Splicing factor, suppressor of white-apricot homolog	1	SGVSSDNEDDDDEEDGNYLHPSLFASK	SGVSS(UniMod:21)DNEDDDDEEDGNYLHPSLFASK	3	SGVSS(UniMod:21)DNEDDDDEEDGNYLHPSLFASK3	601119	673172	626220
Q8IVF2	Q8IVF2	AHNK2_HUMAN	AHNAK2	Protein AHNAK2	1	SHSSSEAYEPR	SHS(UniMod:21)SSEAYEPR	2	SHS(UniMod:21)SSEAYEPR2	410149	303763	332368
O75376	O75376;J3KS29;J3QKP0;E7EVK1	NCOR1_HUMAN	NCOR1	Nuclear receptor corepressor 1	1	SHVSSEPYEPISPPQVPVVHEK	SHVSSEPYEPIS(UniMod:21)PPQVPVVHEK	3	SHVSSEPYEPIS(UniMod:21)PPQVPVVHEK3	317973	331970	286471
P06748	P06748;E5RI98;A0A7I2YQC0;A0A7I2V5S2	NPM_HUMAN	NPM1	Nucleophosmin	1	SIRDTPAK	SIRDT(UniMod:21)PAK	2	SIRDT(UniMod:21)PAK2	543320	570251	461356
P18615	P18615;A2ABK4;A0A0G2JI50;A0A0A0MSN9;E9PD43;A0A0A0MT02	NELFE_HUMAN	NELFE	Negative elongation factor E	1	SISADDDLQESSR	SIS(UniMod:21)ADDDLQESSR	2	SIS(UniMod:21)ADDDLQESSR2	1.85044e+06	1.79427e+06	1.74881e+06
P46821	P46821	MAP1B_HUMAN	MAP1B	Microtubule-associated protein 1B	1	SKPLAASPK	SKPLAAS(UniMod:21)PK	2	SKPLAAS(UniMod:21)PK2	384299	352115	295316
Q9UKV3	Q9UKV3;E7EQT4;S4R3H4	ACINU_HUMAN	ACIN1	Apoptotic chromatin condensation inducer in the nucleus	1	SKSPSPPR	SKS(UniMod:21)PS(UniMod:21)PPR	2	SKS(UniMod:21)PS(UniMod:21)PPR2	413013	398126	343459
P55081	P55081	MFAP1_HUMAN	MFAP1	Microfibrillar-associated protein 1	1	SLAALDALNTDDENDEEEYEAWK	SLAALDALNT(UniMod:21)DDENDEEEYEAWK	3	SLAALDALNT(UniMod:21)DDENDEEEYEAWK3	868849	757134	752738
Q13185	Q13185;S4R2Y4	CBX3_HUMAN	CBX3	Chromobox protein homolog 3	1	SLSDSESDDSK	SLS(UniMod:21)DSESDDSK	2	SLS(UniMod:21)DSESDDSK2	5.42381e+06	4.81845e+06	4.48078e+06
Q96T37	Q96T37;A0A494C001;A0A087WWP4;A0A499FJY3	RBM15_HUMAN	RBM15	RNA-binding protein 15	1	SLSPGGAALGYR	SLS(UniMod:21)PGGAALGYR	2	SLS(UniMod:21)PGGAALGYR2	1.82129e+06	1.91998e+06	1.74458e+06
Q5T200	Q5T200;A0A7I2V4I5	ZC3HD_HUMAN	ZC3H13	Zinc finger CCCH domain-containing protein 13	1	SLSPSHLTEDR	SLS(UniMod:21)PSHLTEDR	2	SLS(UniMod:21)PSHLTEDR2	922490	924272	904851
Q4V328	Q4V328;A0A087WXA6;A0A087WT45	GRAP1_HUMAN	GRIPAP1	GRIP1-associated protein 1	1	SLSSSPQAQPPRPAELSDEEVAELFQR	SLS(UniMod:21)SSPQAQPPRPAELSDEEVAELFQR	3	SLS(UniMod:21)SSPQAQPPRPAELSDEEVAELFQR3	799493	695925	994526
O95292	O95292	VAPB_HUMAN	VAPB	Vesicle-associated membrane protein-associated protein B/C	1	SLSSSLDDTEVK	SLSSS(UniMod:21)LDDTEVK	2	SLSSS(UniMod:21)LDDTEVK2	128709
P08670	P08670;A0A1B0GTT5;A0A1B0GVG8;B0YJC4	VIME_HUMAN	VIM	Vimentin	1	SLYASSPGGVYATR	SLYASS(UniMod:21)PGGVYATR	2	SLYASS(UniMod:21)PGGVYATR2	2.5221e+06	2.42393e+06	2.18375e+06
Q5JSH3	Q5JSH3;H7BY83	WDR44_HUMAN	WDR44	WD repeat-containing protein 44	1	SNSGRELTDEEILASVMIK	SNS(UniMod:21)GRELTDEEILASVMIK	3	SNS(UniMod:21)GRELTDEEILASVMIK3	310265	352909	366176
Q13247	Q13247	SRSF6_HUMAN	SRSF6	Serine/arginine-rich splicing factor 6	1	SNSPLPVPPSK	SNS(UniMod:21)PLPVPPSK	2	SNS(UniMod:21)PLPVPPSK2	551474	496230	429558
Q9Y4F1	Q9Y4F1;C9JME2;M0QXT1	FARP1_HUMAN	FARP1	FERM, ARHGEF and pleckstrin domain-containing protein 1	1	SPDEATAADQESEDDLSASRTSLER	SPDEATAADQESEDDLS(UniMod:21)ASRTSLER	3	SPDEATAADQESEDDLS(UniMod:21)ASRTSLER3		287019	223055
Q9Y3T9	Q9Y3T9	NOC2L_HUMAN	NOC2L	Nucleolar complex protein 2 homolog	1	SPDKPGGSPSASR	SPDKPGGS(UniMod:21)PSASR	2	SPDKPGGS(UniMod:21)PSASR2	295799	227321	247752
P08651	P08651;A0A286YEX4	NFIC_HUMAN	NFIC	Nuclear factor 1 C-type	1	SPFNSPSPQDSPR	SPFNSPS(UniMod:21)PQDSPR	2	SPFNSPS(UniMod:21)PQDSPR2	1.12378e+06	996944	949702
Q68EM7	Q68EM7;I3L460	RHG17_HUMAN	ARHGAP17	Rho GTPase-activating protein 17	1	SPSPPTQHTGQPPGQPSAPSQLSAPR	SPS(UniMod:21)PPTQHTGQPPGQPSAPSQLSAPR	3	SPS(UniMod:21)PPTQHTGQPPGQPSAPSQLSAPR3	5.43575e+06	5.36742e+06	4.87265e+06
Q16643	Q16643;D6R9Q9	DREB_HUMAN	DBN1	Drebrin	1	SPSDSSTASTPVAEQIER	SPSDS(UniMod:21)STASTPVAEQIER	2	SPSDS(UniMod:21)STASTPVAEQIER2	132834	172601	133373
P46821	P46821	MAP1B_HUMAN	MAP1B	Microtubule-associated protein 1B	1	SPSLSPSPPSPLEK	SPSLSPSPPS(UniMod:21)PLEK	2	SPSLSPSPPS(UniMod:21)PLEK2	1.77951e+06	1.81461e+06	1.53632e+06
Q05193	Q05193;A0A0D9SFB1;A0A0D9SFE4;A0A0U1RQP1	DYN1_HUMAN	DNM1	Dynamin-1	1	SPTSSPTPQR	SPTS(UniMod:21)S(UniMod:21)PTPQR	2	SPTS(UniMod:21)S(UniMod:21)PTPQR2	166910	178358	173501
Q03701	Q03701	CEBPZ_HUMAN	CEBPZ	CCAAT/enhancer-binding protein zeta	1	SQLDDHPESDDEENFIDANDDEDMEK	SQLDDHPES(UniMod:21)DDEENFIDANDDEDMEK	3	SQLDDHPES(UniMod:21)DDEENFIDANDDEDMEK3	2.5887e+06	2.85705e+06	2.66775e+06
P46937	P46937;H0YCI3	YAP1_HUMAN	YAP1	Transcriptional coactivator YAP1	1	SQLPTLEQDGGTQNPVSSPGMSQELR	SQLPTLEQDGGTQNPVSS(UniMod:21)PGMSQELR	3	SQLPTLEQDGGTQNPVSS(UniMod:21)PGMSQELR3	435727	517143	389521
O95155	O95155	UBE4B_HUMAN	UBE4B	Ubiquitin conjugation factor E4 B	1	SQSMDIDGVSCEK	SQS(UniMod:21)MDIDGVSC(UniMod:4)EK	2	SQS(UniMod:21)MDIDGVSC(UniMod:4)EK2	78954.7	89318.8	81893.7
Q9NYL2	Q9NYL2	M3K20_HUMAN	MAP3K20	Mitogen-activated protein kinase kinase kinase 20	1	SQSNPILGSPFFSHFDGQDSYAAAVR	SQS(UniMod:21)NPILGSPFFSHFDGQDSYAAAVR	3	SQS(UniMod:21)NPILGSPFFSHFDGQDSYAAAVR3	137899	112402	107246
P23588	P23588;E7EX17	IF4B_HUMAN	EIF4B	Eukaryotic translation initiation factor 4B	1	SQSSDTEQQSPTSGGGK	SQS(UniMod:21)SDTEQQSPTSGGGK	2	SQS(UniMod:21)SDTEQQSPTSGGGK2	862566	518762	691366
O95155	O95155	UBE4B_HUMAN	UBE4B	Ubiquitin conjugation factor E4 B	1	SQSSEGVSSLSSSPSNSLETQSQSLSR	SQS(UniMod:21)SEGVSSLSSSPSNSLETQSQSLSR	3	SQS(UniMod:21)SEGVSSLSSSPSNSLETQSQSLSR3		136307	218169
Q9Y2X7	Q9Y2X7;J3QRU8;A0A0C4DGN6;J3QLH1	GIT1_HUMAN	GIT1	ARF GTPase-activating protein GIT1	1	SQSDLDDQHDYDSVASDEDTDQEPLR	SQSDLDDQHDYDS(UniMod:21)VASDEDT(UniMod:21)DQEPLR	3	SQSDLDDQHDYDS(UniMod:21)VASDEDT(UniMod:21)DQEPLR3	235393	229018
Q9Y2X7	Q9Y2X7;J3QRU8;A0A0C4DGN6;J3QLH1	GIT1_HUMAN	GIT1	ARF GTPase-activating protein GIT1	1	SQSDLDDQHDYDSVASDEDTDQEPLR	SQSDLDDQHDYDSVAS(UniMod:21)DEDTDQEPLR	3	SQSDLDDQHDYDSVAS(UniMod:21)DEDTDQEPLR3	406233	490260	484535
Q8WUA7	Q8WUA7;F8WDP1;A0A0A0MRY0	TB22A_HUMAN	TBC1D22A	TBC1 domain family member 22A	1	SQSLPHSATVTLGGTSDPSTLSSSALSER	SQSLPHSAT(UniMod:21)VTLGGTSDPSTLSSSALSER	3	SQSLPHSAT(UniMod:21)VTLGGTSDPSTLSSSALSER3	97377.6	84279.1	77621
O95817	O95817;C9JFK9	BAG3_HUMAN	BAG3	BAG family molecular chaperone regulator 3	1	SQSPAASDCSSSSSSASLPSSGR	SQSPAAS(UniMod:21)DC(UniMod:4)SSSSSSASLPSSGR	3	SQSPAAS(UniMod:21)DC(UniMod:4)SSSSSSASLPSSGR3	127030	157136	106892
P23588	P23588;E7EX17	IF4B_HUMAN	EIF4B	Eukaryotic translation initiation factor 4B	1	SQSSDTEQQSPTSGGGK	SQSSDTEQQS(UniMod:21)PTSGGGK	2	SQSSDTEQQS(UniMod:21)PTSGGGK2	1.46433e+06	1.30053e+06	1.15906e+06
O95155	O95155	UBE4B_HUMAN	UBE4B	Ubiquitin conjugation factor E4 B	1	SQSSEGVSSLSSSPSNSLETQSQSLSR	SQSSEGVSSLSS(UniMod:21)SPSNSLETQSQSLSR	3	SQSSEGVSSLSS(UniMod:21)SPSNSLETQSQSLSR3	226336
Q14676	Q14676	MDC1_HUMAN	MDC1	Mediator of DNA damage checkpoint protein 1	1	SQTTTERDSDTDVEEEELPVENR	SQTTTERDS(UniMod:21)DT(UniMod:21)DVEEEELPVENR	3	SQTTTERDS(UniMod:21)DT(UniMod:21)DVEEEELPVENR3	1.69898e+06	1.70028e+06	1.43295e+06
Q8WX93	Q8WX93	PALLD_HUMAN	PALLD	Palladin	1	SRDSGDENEPIQER	SRDS(UniMod:21)GDENEPIQER	2	SRDS(UniMod:21)GDENEPIQER2	1.38649e+06	1.02085e+06	987906
Q13263	Q13263;M0R0K9	TIF1B_HUMAN	TRIM28	Transcription intermediary factor 1-beta	1	SRSGEGEVSGLMR	SRS(UniMod:21)GEGEVSGLMR	2	SRS(UniMod:21)GEGEVSGLMR2	2.1182e+06	1.83252e+06	1.41134e+06
Q9Y618	Q9Y618;C9J7T7;C9J0Q5;A0A384DVL6;C9JQE8;C9JE98	NCOR2_HUMAN	NCOR2	Nuclear receptor corepressor 2	1	SRSPAPPADK	SRS(UniMod:21)PAPPADK	2	SRS(UniMod:21)PAPPADK2	158457	206239	149342
Q9UQ35	Q9UQ35;I3L3Q8	SRRM2_HUMAN	SRRM2	Serine/arginine repetitive matrix protein 2	1	SRTPPSAPSQSR	SRT(UniMod:21)PPSAPSQSR	2	SRT(UniMod:21)PPSAPSQSR2	1.24929e+06	749123	1.1528e+06
Q8IYB3	Q8IYB3;M0R088;A9Z1X7	SRRM1_HUMAN	SRRM1	Serine/arginine repetitive matrix protein 1	1	SRVSVSPGR	SRVS(UniMod:21)VS(UniMod:21)PGR	2	SRVS(UniMod:21)VS(UniMod:21)PGR2	662688	635172
O95429	O95429;H0YBT1	BAG4_HUMAN	BAG4	BAG family molecular chaperone regulator 4	1	SSGNSPTPVSR	SS(UniMod:21)GNSPTPVSR	2	SS(UniMod:21)GNSPTPVSR2	26738.1	122407	106162
Q9BTU6	Q9BTU6;E9PAM4	P4K2A_HUMAN	PI4K2A	Phosphatidylinositol 4-kinase type 2-alpha	1	SSSESYTQSFQSR	SS(UniMod:21)SESYTQSFQSR	2	SS(UniMod:21)SESYTQSFQSR2	217477	217946	184264
Q9UQ35	Q9UQ35	SRRM2_HUMAN	SRRM2	Serine/arginine repetitive matrix protein 2	1	SSSPVTELASR	SS(UniMod:21)SPVTELASR	2	SS(UniMod:21)SPVTELASR2	151443	159554	142654
Q9UQ35	Q9UQ35;I3L4D8;I3L182	SRRM2_HUMAN	SRRM2	Serine/arginine repetitive matrix protein 2	1	SSTPPRQSPSR	SS(UniMod:21)TPPRQS(UniMod:21)PSR	2	SS(UniMod:21)TPPRQS(UniMod:21)PSR2	1.88823e+06	1.66309e+06	1.6721e+06
Q6ZMT1	Q6ZMT1	STAC2_HUMAN	STAC2	SH3 and cysteine-rich domain-containing protein 2	1	SSEEGPGDSASPVFTAPAESEGPGPEEK	SSEEGPGDSASPVFT(UniMod:21)APAESEGPGPEEK	3	SSEEGPGDSASPVFT(UniMod:21)APAESEGPGPEEK3	23034.3	50957.9
P51991	P51991;A0A7I2V4G0;A0A7I2V402;A0A7I2V5D8;H7C1J8;A0A7I2V2R3	ROA3_HUMAN	HNRNPA3	Heterogeneous nuclear ribonucleoprotein A3	1	SSGSPYGGGYGSGGGSGGYGSR	SSGS(UniMod:21)PYGGGYGSGGGSGGYGSR	2	SSGS(UniMod:21)PYGGGYGSGGGSGGYGSR2	1.53859e+06	1.15233e+06	1.12023e+06
Q5T1M5	Q5T1M5;A0A8I5KX71;A0A8I5QJL3;A0A8I5QJ94	FKB15_HUMAN	FKBP15	FK506-binding protein 15	1	SSLSGDEEDELFK	SSLS(UniMod:21)GDEEDELFK	2	SSLS(UniMod:21)GDEEDELFK2	173878	50794
Q4G0J3	Q4G0J3;A0A8I5KQG7;A0A8I5KSZ3;A0A8I5KUI4;H0YA82;A0A8I5KYN2	LARP7_HUMAN	LARP7	La-related protein 7	1	SSSEDAESLAPR	SSS(UniMod:21)EDAESLAPR	2	SSS(UniMod:21)EDAESLAPR2	544329	463368	409612
Q9NYL2	Q9NYL2	M3K20_HUMAN	MAP3K20	Mitogen-activated protein kinase kinase kinase 20	1	SSSPTQYGLTK	SSS(UniMod:21)PTQYGLTK	2	SSS(UniMod:21)PTQYGLTK2	302310	301414	306563
Q8IZ21	Q8IZ21;A0A0J9YVR0	PHAR4_HUMAN	PHACTR4	Phosphatase and actin regulator 4	1	SSSPVQVEEEPVR	SSS(UniMod:21)PVQVEEEPVR	2	SSS(UniMod:21)PVQVEEEPVR2	877544	804403	737845
P35606	P35606;H0YAC7;A0A7I2V258;H0Y938	COPB2_HUMAN	COPB2	Coatomer subunit beta'	1	STAQQELDGKPASPTPVIVASHTANK	STAQQELDGKPAS(UniMod:21)PTPVIVASHTANK	3	STAQQELDGKPAS(UniMod:21)PTPVIVASHTANK3	4.28986e+06	4.61438e+06	4.1521e+06
Q9NYF8	Q9NYF8;A0A1W2PQ43;E9PK91;E9PK09;E9PKI6;E9PJA7;E9PQN2	BCLF1_HUMAN	BCLAF1	Bcl-2-associated transcription factor 1	1	STFREESPLR	STFREES(UniMod:21)PLR	2	STFREES(UniMod:21)PLR2	1.3543e+06		1.44231e+06
Q96T23	Q96T23;H0YER1;H0YCN2	RSF1_HUMAN	RSF1	Remodeling and spacing factor 1	1	STLESEKPGSPEAAETSPPSNIIDHCEK	STLES(UniMod:21)EKPGSPEAAETSPPSNIIDHC(UniMod:4)EK	3	STLES(UniMod:21)EKPGSPEAAETSPPSNIIDHC(UniMod:4)EK3	522991	347874	377650
Q86TB9	Q86TB9	PATL1_HUMAN	PATL1	Protein PAT1 homolog 1	1	STSPIIGSPPVR	STS(UniMod:21)PIIGSPPVR	2	STS(UniMod:21)PIIGSPPVR2	125297	121921	149402
Q14157	Q14157;F8W726	UBP2L_HUMAN	UBAP2L	Ubiquitin-associated protein 2-like	1	STSAPQMSPGSSDNQSSSPQPAQQK	STSAPQMS(UniMod:21)PGSSDNQSSSPQPAQQK	3	STSAPQMS(UniMod:21)PGSSDNQSSSPQPAQQK3	1.84997e+06	1.61289e+06	1.58331e+06
Q8WWM7	Q8WWM7;H3BUF6;H3BRB0;A0A0C4DGL7	ATX2L_HUMAN	ATXN2L	Ataxin-2-like protein	1	STSTPTSPGPR	STSTPTS(UniMod:21)PGPR	2	STSTPTS(UniMod:21)PGPR2	306700	204525	291059
O75592	O75592;A0A804HIR9;A0A804HL12;A0A804HJ25;A0A499FJI4;A0A804HKQ1	MYCB2_HUMAN	MYCBP2	E3 ubiquitin-protein ligase MYCBP2	1	STSVPAPYISVTPDASPNVFEEPESNMK	STSVPAPY(UniMod:21)ISVTPDASPNVFEEPESNMK	3	STSVPAPY(UniMod:21)ISVTPDASPNVFEEPESNMK3	216335		222692
A0A7I2V647	A0A7I2V647	A0A7I2V647_HUMAN	G3BP2	Ras GTPase-activating protein-binding protein 2	1	STTPPPAEPVSLPQEPPKPR	STT(UniMod:21)PPPAEPVSLPQEPPKPR	3	STT(UniMod:21)PPPAEPVSLPQEPPKPR3	735290	754981	782481
P18583	P18583	SON_HUMAN	SON	Protein SON	1	SVESTSPEPSK	SVESTS(UniMod:21)PEPSK	2	SVESTS(UniMod:21)PEPSK2	408343	443408	347582
P02545	P02545;A0A6Q8PFJ0	LMNA_HUMAN	LMNA	Prelamin-A/C	1	SVGGSGGGSFGDNLVTR	SVGGS(UniMod:21)GGGSFGDNLVTR	2	SVGGS(UniMod:21)GGGSFGDNLVTR2	639199	743182	630902
P82094	P82094;A0A2R8Y7M0;F8WF45	TMF1_HUMAN	TMF1	TATA element modulatory factor	1	SVSEINSDDELSGK	SVSEINS(UniMod:21)DDELSGK	2	SVSEINS(UniMod:21)DDELSGK2	661784	650627	552104
Q9NR19	Q9NR19;C9JY31;F8WCJ4;C9JXD9;C9IYL0;B4DEH9	ACSA_HUMAN	ACSS2	Acetyl-coenzyme A synthetase, cytoplasmic	1	SWSPPPEVSR	SWS(UniMod:21)PPPEVSR	2	SWS(UniMod:21)PPPEVSR2	569194	626019	546368
Q9Y2W1	Q9Y2W1;A0A3B3ITZ9	TR150_HUMAN	THRAP3	Thyroid hormone receptor-associated protein 3	1	SYSPAHNR	SYS(UniMod:21)PAHNR	2	SYS(UniMod:21)PAHNR2	601656	540652	586016
Q14694	Q14694	UBP10_HUMAN	USP10	Ubiquitin carboxyl-terminal hydrolase 10	1	TCNSPQNSTDSVSDIVPDSPFPGALGSDTR	T(UniMod:21)C(UniMod:4)NSPQNSTDSVSDIVPDSPFPGALGSDTR	3	T(UniMod:21)C(UniMod:4)NSPQNSTDSVSDIVPDSPFPGALGSDTR3	504660	643834	527857
Q14247	Q14247;H0YEV2;H0YCD9	SRC8_HUMAN	CTTN	Src substrate cortactin	1	TQTPPVSPAPQPTEERLPSSPVYEDAASFK	T(UniMod:21)QTPPVSPAPQPTEERLPSSPVYEDAASFK	3	T(UniMod:21)QTPPVSPAPQPTEERLPSSPVYEDAASFK3	795116	885515	646282
A0A0D9SGE8;Q5JRC6	A0A0D9SGE8;Q5JRC6	A0A0D9SGE8_HUMAN;Q5JRC6_HUMAN	PHF6	PHD finger protein 6	1	TAHNSEAADLEESFNEHELEPSSPK	TAHNSEAADLEESFNEHELEPSS(UniMod:21)PK	3	TAHNSEAADLEESFNEHELEPSS(UniMod:21)PK3	705026		743341
Q8IWS0	Q8IWS0	PHF6_HUMAN	PHF6	PHD finger protein 6	1	TAHNSEADLEESFNEHELEPSSPK	TAHNSEADLEES(UniMod:21)FNEHELEPSS(UniMod:21)PK	3	TAHNSEADLEES(UniMod:21)FNEHELEPSS(UniMod:21)PK3		275764
Q8IWS0	Q8IWS0	PHF6_HUMAN	PHF6	PHD finger protein 6	1	TAHNSEADLEESFNEHELEPSSPK	TAHNSEADLEESFNEHELEPSS(UniMod:21)PK	3	TAHNSEADLEESFNEHELEPSS(UniMod:21)PK3	2.70743e+06	2.99569e+06	2.77882e+06
P16220	P16220;C9JBT4;H7C1R5;C9J896	CREB1_HUMAN	CREB1	Cyclic AMP-responsive element-binding protein 1	1	TAPTSTIAPGVVMASSPALPTQPAEEAAR	TAPTSTIAPGVVMASS(UniMod:21)PALPTQPAEEAAR	3	TAPTSTIAPGVVMASS(UniMod:21)PALPTQPAEEAAR3	114200	88321.4	89101.2
Q9UKV3	Q9UKV3;E7EQT4;G3V3B0;S4R3H4	ACINU_HUMAN	ACIN1	Apoptotic chromatin condensation inducer in the nucleus	1	TAQVPSPPR	TAQVPS(UniMod:21)PPR	2	TAQVPS(UniMod:21)PPR2	462372	400690	406358
P53396	P53396	ACLY_HUMAN	ACLY	ATP-citrate synthase	1	TASFSESRADEVAPAK	TAS(UniMod:21)FSESRADEVAPAK	2	TAS(UniMod:21)FSESRADEVAPAK2	1.96649e+06	1.84878e+06	1.6216e+06
Q8IYB3	Q8IYB3;M0R088;A9Z1X7	SRRM1_HUMAN	SRRM1	Serine/arginine repetitive matrix protein 1	1	TASPPPPPK	TAS(UniMod:21)PPPPPK	2	TAS(UniMod:21)PPPPPK2	1.194e+06	1.11574e+06	966757
Q8IYB3	Q8IYB3;M0R088;A9Z1X7	SRRM1_HUMAN	SRRM1	Serine/arginine repetitive matrix protein 1	1	TASPPPPPKR	TAS(UniMod:21)PPPPPKR	2	TAS(UniMod:21)PPPPPKR2	308119	157902	245267
Q6PKG0	Q6PKG0;A0A8I5KWU3;A0A8I5KSP1	LARP1_HUMAN	LARP1	La-related protein 1	1	TASISSSPSEGTPTVGSYGCTPQSLPK	TASIS(UniMod:21)S(UniMod:21)SPSEGTPTVGSYGC(UniMod:4)TPQSLPK	3	TASIS(UniMod:21)S(UniMod:21)SPSEGTPTVGSYGC(UniMod:4)TPQSLPK3	428390	386126	379417
Q6PKG0	Q6PKG0;A0A8I5KWU3;A0A8I5KSP1	LARP1_HUMAN	LARP1	La-related protein 1	1	TASISSSPSEGTPTVGSYGCTPQSLPK	TASISSSPS(UniMod:21)EGTPTVGSYGC(UniMod:4)TPQSLPK	3	TASISSSPS(UniMod:21)EGTPTVGSYGC(UniMod:4)TPQSLPK3	521122	527331	582616
Q9H6Y2	Q9H6Y2;D6RGJ8	WDR55_HUMAN	WDR55	WD repeat-containing protein 55	1	TCEERPAEDGSDEEDPDSMEAPTR	TC(UniMod:4)EERPAEDGS(UniMod:21)DEEDPDSMEAPTR	3	TC(UniMod:4)EERPAEDGS(UniMod:21)DEEDPDSMEAPTR3	303105	185460	265582
O00303	O00303;H0YDT6	EIF3F_HUMAN	EIF3F	Eukaryotic translation initiation factor 3 subunit F	1	TCFSPNRVIGLSSDLQQVGGASAR	TC(UniMod:4)FS(UniMod:21)PNRVIGLSSDLQQVGGASAR	3	TC(UniMod:4)FS(UniMod:21)PNRVIGLSSDLQQVGGASAR3	78204.4	132214	35833.4
Q9BW61	Q9BW61	DDA1_HUMAN	DDA1	DET1- and DDB1-associated protein 1	1	TDSPDMHEDT	TDS(UniMod:21)PDMHEDT	2	TDS(UniMod:21)PDMHEDT2	441612	404849	280053
Q9GZR7	Q9GZR7;A0A1W2PRR2;G3V529;F5GYL3	DDX24_HUMAN	DDX24	ATP-dependent RNA helicase DDX24	1	TEAGAETRSPGK	TEAGAET(UniMod:21)RSPGK	2	TEAGAET(UniMod:21)RSPGK2	115651	128707	146708
O94864	O94864	ST65G_HUMAN	SUPT7L	STAGA complex 65 subunit gamma	1	TEESEPLPSCPGSPPLPDDLLPLDCK	TEESEPLPS(UniMod:21)C(UniMod:4)PGSPPLPDDLLPLDC(UniMod:4)K	3	TEESEPLPS(UniMod:21)C(UniMod:4)PGSPPLPDDLLPLDC(UniMod:4)K3	303479	325821	252523
P05114	P05114;A6NL93;A6NEL0	HMGN1_HUMAN	HMGN1	Non-histone chromosomal protein HMG-14	1	TEESPASDEAGEK	TEESPAS(UniMod:21)DEAGEK	2	TEESPAS(UniMod:21)DEAGEK2	1.27918e+06	1.15313e+06	1.04692e+06
Q09472	Q09472;A0A669KB12	EP300_HUMAN	EP300	Histone acetyltransferase p300	1	TEIKEEEDQPSTSATQSSPAPGQSK	TEIKEEEDQPSTSATQS(UniMod:21)SPAPGQSK	3	TEIKEEEDQPSTSATQS(UniMod:21)SPAPGQSK3	209746	350371	304426
Q15637	Q15637;A0A7P0T9U7	SF01_HUMAN	SF1	Splicing factor 1	1	TGDLGIPPNPEDRSPSPEPIYNSEGK	TGDLGIPPNPEDRS(UniMod:21)PS(UniMod:21)PEPIYNSEGK	3	TGDLGIPPNPEDRS(UniMod:21)PS(UniMod:21)PEPIYNSEGK3	3.19737e+06	3.39967e+06	3.14855e+06
Q14135	Q14135;E7EUJ2;E7EQU6;E7ERW0;A0A0A6YYI5;F8WBN7;F8W708;A0A075B6E4;A0A096LP98;E7EWF5;G5E9M7	VGLL4_HUMAN	VGLL4	Transcription cofactor vestigial-like protein 4	1	TGPPPISPSK	TGPPPISPS(UniMod:21)K	2	TGPPPISPS(UniMod:21)K2	279648	271099	266636
P23588	P23588;E7EX17	IF4B_HUMAN	EIF4B	Eukaryotic translation initiation factor 4B	1	TGSESSQTGTSTTSSR	TGS(UniMod:21)ES(UniMod:21)SQTGTSTTSSR	2	TGS(UniMod:21)ES(UniMod:21)SQTGTSTTSSR2	167401	103072	135470
P23588	P23588;E7EX17	IF4B_HUMAN	EIF4B	Eukaryotic translation initiation factor 4B	1	TGSESSQTGTSTTSSR	TGS(UniMod:21)ESSQTGTSTTSSR	2	TGS(UniMod:21)ESSQTGTSTTSSR2	1.14724e+06	1.11549e+06	942003
Q8N556	Q8N556	AFAP1_HUMAN	AFAP1	Actin filament-associated protein 1	1	TGSNAAQYK	TGS(UniMod:21)NAAQYK	2	TGS(UniMod:21)NAAQYK2	88376.8	84245.1
Q9UPT8	Q9UPT8;M0QY97	ZC3H4_HUMAN	ZC3H4	Zinc finger CCCH domain-containing protein 4	1	TGSGSPFAGNSPAR	TGSGS(UniMod:21)PFAGNSPAR	2	TGSGS(UniMod:21)PFAGNSPAR2	70199.3	86347.9	69828.7
P49023	P49023;A0A1B0GTU4;F5GZ78	PAXI_HUMAN	PXN	Paxillin	1	TGSSSPPGGPPK	TGSSS(UniMod:21)PPGGPPK	2	TGSSS(UniMod:21)PPGGPPK2	546522	400210	264288
O75475	O75475	PSIP1_HUMAN	PSIP1	PC4 and SFRS1-interacting protein	1	TGVTSTSDSEEEGDDQEGEK	TGVTST(UniMod:21)S(UniMod:21)DSEEEGDDQEGEK	3	TGVTST(UniMod:21)S(UniMod:21)DSEEEGDDQEGEK3		146960
O75475	O75475	PSIP1_HUMAN	PSIP1	PC4 and SFRS1-interacting protein	1	TGVTSTSDSEEEGDDQEGEKK	TGVTSTS(UniMod:21)DS(UniMod:21)EEEGDDQEGEKK	3	TGVTSTS(UniMod:21)DS(UniMod:21)EEEGDDQEGEKK3	526491	455152
O00712	O00712;A0A1B0GU97;A0A1B0GVN4;Q5VW27;Q5VW30;U3KQE8;A0A1B0GWB8;A0A1B0GW37;A0A0A0MRX8;A0A1B0GWJ4;A0A1B0GWI9;Q5VW26;Q5VW31;A0A2R8Y7V8	NFIB_HUMAN	NFIB	Nuclear factor 1 B-type	1	TISIDENMEPSPTGDFYPSPSSPAAGSR	TISIDENMEPSPT(UniMod:21)GDFYPSPSS(UniMod:21)PAAGSR	3	TISIDENMEPSPT(UniMod:21)GDFYPSPSS(UniMod:21)PAAGSR3	295366	307915	304126
P23588	P23588;F8VRU1;E7EX17;F8VX11;F8VSC7;F8VYE9;F8VP89	IF4B_HUMAN	EIF4B	Eukaryotic translation initiation factor 4B	1	TISLTDFLAEDGGTGGGSTYVSK	TISLTDFLAEDGGT(UniMod:21)GGGSTYVSK	3	TISLTDFLAEDGGT(UniMod:21)GGGSTYVSK3	165576	164131	152323
Q8N556	Q8N556	AFAP1_HUMAN	AFAP1	Actin filament-associated protein 1	1	TLENSPISSCDTSDTEGPVPVNSAAVLK	TLENSPISS(UniMod:21)C(UniMod:4)DTSDTEGPVPVNSAAVLK	3	TLENSPISS(UniMod:21)C(UniMod:4)DTSDTEGPVPVNSAAVLK3	395505	380458	428824
P46821	P46821	MAP1B_HUMAN	MAP1B	Microtubule-associated protein 1B	1	TLEVVSPSQSVTGSAGHTPYYQSPTDEK	TLEVVS(UniMod:21)PSQSVTGSAGHTPYYQSPTDEK	3	TLEVVS(UniMod:21)PSQSVTGSAGHTPYYQSPTDEK3	1.17895e+06	1.27697e+06	1.01693e+06
Q13523	Q13523	PRP4B_HUMAN	PRPF4B	Serine/threonine-protein kinase PRP4 homolog	1	TLSPGRR	TLS(UniMod:21)PGRR	2	TLS(UniMod:21)PGRR2	853067	954872	867920
Q8WW12	Q8WW12	PCNP_HUMAN	PCNP	PEST proteolytic signal-containing nuclear protein	1	TLSVAAAFNEDEDSEPEEMPPEAK	TLSVAAAFNEDEDS(UniMod:21)EPEEMPPEAK	3	TLSVAAAFNEDEDS(UniMod:21)EPEEMPPEAK3	3.54005e+06	2.67578e+06	3.37508e+06
P35221	P35221;G3XAM7	CTNA1_HUMAN	CTNNA1	Catenin alpha-1	1	TPEELDDSDFETEDFDVR	TPEELDDS(UniMod:21)DFETEDFDVR	3	TPEELDDS(UniMod:21)DFETEDFDVR3	667784	676191	714084
Q13541	Q13541	4EBP1_HUMAN	EIF4EBP1	Eukaryotic translation initiation factor 4E-binding protein 1	1	TPPRDLPTIPGVTSPSSDEPPMEASQSHLR	TPPRDLPT(UniMod:21)IPGVTSPSSDEPPMEASQSHLR	3	TPPRDLPT(UniMod:21)IPGVTSPSSDEPPMEASQSHLR3	712414	552030	631782
Q14839	Q14839;A0A2U3TZM0;A0A2R8Y8C1;F5GWX5;A0A2R8YFK9;A0A2R8Y4X2;A0A2R8Y445;A0A2R8Y5M9;A0A2R8YER1;A0A2R8Y425;A0A2R8YE38;A0A2R8Y7M9;A0A2R8YD40;A0A2R8Y5J0;A0A2R8YDW2;A0A0C4DGG9;A0A2R8Y521;A0A2R8Y212	CHD4_HUMAN	CHD4	Chromodomain-helicase-DNA-binding protein 4	1	TPTPSTPGDTQPNTPAPVPPAEDGIK	TPTPSTPGDT(UniMod:21)QPNTPAPVPPAEDGIK	3	TPTPSTPGDT(UniMod:21)QPNTPAPVPPAEDGIK3	208657	170704	219655
Q13428	Q13428;A0A6I8PRA0	TCOF_HUMAN	TCOF1	Treacle protein	1	TQPSSGVDSAVGTLPATSPQSTSVQAK	TQPSSGVDSAVGTLPAT(UniMod:21)SPQSTSVQAK	3	TQPSSGVDSAVGTLPAT(UniMod:21)SPQSTSVQAK3	677985	677978	504312
Q9H5H4	Q9H5H4;H3BS42	ZN768_HUMAN	ZNF768	Zinc finger protein 768	1	TQSPEFEAQSSK	TQS(UniMod:21)PEFEAQSSK	2	TQS(UniMod:21)PEFEAQSSK2	158934	151486	88064.5
Q96MH2	Q96MH2;K7ESM2;K7EJA3;K7ELS4;K7ERG7	HEXI2_HUMAN	HEXIM2	Protein HEXIM2	1	TQSPGGCSAEAVLAR	TQS(UniMod:21)PGGC(UniMod:4)SAEAVLAR	2	TQS(UniMod:21)PGGC(UniMod:4)SAEAVLAR2	177348	168482	177168
Q14247	Q14247;H0YEV2;H0YCD9	SRC8_HUMAN	CTTN	Src substrate cortactin	1	TQTPPVSPAPQPTEERLPSSPVYEDAASFK	TQT(UniMod:21)PPVS(UniMod:21)PAPQPTEERLPSS(UniMod:21)PVYEDAASFK	3	TQT(UniMod:21)PPVS(UniMod:21)PAPQPTEERLPSS(UniMod:21)PVYEDAASFK3	2.2226e+06	1.36908e+06	1.42193e+06
Q14247	Q14247;H0YEV2;H0YCD9	SRC8_HUMAN	CTTN	Src substrate cortactin	1	TQTPPVSPAPQPTEERLPSSPVYEDAASFK	TQT(UniMod:21)PPVS(UniMod:21)PAPQPTEERLPSSPVYEDAASFK	3	TQT(UniMod:21)PPVS(UniMod:21)PAPQPTEERLPSSPVYEDAASFK3	2.20065e+06	2.32034e+06	2.1359e+06
Q8IYB3	Q8IYB3;M0R088;A9Z1X7	SRRM1_HUMAN	SRRM1	Serine/arginine repetitive matrix protein 1	1	TRHSPTPQQSNR	TRHS(UniMod:21)PTPQQSNR	2	TRHS(UniMod:21)PTPQQSNR2	84115.7	525161	399530
Q01130	Q01130;J3QL05;J3KP15	SRSF2_HUMAN	SRSF2	Serine/arginine-rich splicing factor 2	1	TSPDTLRR	TS(UniMod:21)PDTLRR	2	TS(UniMod:21)PDTLRR2	3.24696e+06	3.80247e+06	3.54728e+06
P49792	P49792	RBP2_HUMAN	RANBP2	E3 SUMO-protein ligase RanBP2	1	TSPENVQDR	TS(UniMod:21)PENVQDR	2	TS(UniMod:21)PENVQDR2	347839	369081	339484
P49585	P49585;C9JEJ2	PCY1A_HUMAN	PCYT1A	Choline-phosphate cytidylyltransferase A	1	TSPPCSPANLSR	TS(UniMod:21)PPC(UniMod:4)SPANLSR	2	TS(UniMod:21)PPC(UniMod:4)SPANLSR2	925224	895713	819501
Q9UQ35	Q9UQ35	SRRM2_HUMAN	SRRM2	Serine/arginine repetitive matrix protein 2	1	TSPPLLDR	TS(UniMod:21)PPLLDR	2	TS(UniMod:21)PPLLDR2	1.88214e+06	1.43172e+06	1.78258e+06
Q12888	Q12888;A6NNK5;C9JXV0	TP53B_HUMAN	TP53BP1	TP53-binding protein 1	1	TSEIEPKNSPEDLGLSLTGDSCK	TSEIEPKNS(UniMod:21)PEDLGLSLTGDSC(UniMod:4)K	3	TSEIEPKNS(UniMod:21)PEDLGLSLTGDSC(UniMod:4)K3	685267	629237	493156
Q02880	Q02880	TOP2B_HUMAN	TOP2B	DNA topoisomerase 2-beta	1	TSFDQDSDVDIFPSDFPTEPPSLPR	TSFDQDS(UniMod:21)DVDIFPSDFPTEPPSLPR	3	TSFDQDS(UniMod:21)DVDIFPSDFPTEPPSLPR3	115740	145973	388162
Q9NRY4	Q9NRY4	RHG35_HUMAN	ARHGAP35	Rho GTPase-activating protein 35	1	TSFSVGSDDELGPIR	TSFSVGS(UniMod:21)DDELGPIR	2	TSFSVGS(UniMod:21)DDELGPIR2		263278	159413
Q9H1E3	Q9H1E3	NUCKS_HUMAN	NUCKS1	Nuclear ubiquitous casein and cyclin-dependent kinase substrate 1	1	TSTSPPPEK	TSTS(UniMod:21)PPPEK	2	TSTS(UniMod:21)PPPEK2	7.73397e+06	6.60418e+06	5.79652e+06
Q9Y618	Q9Y618;C9J7T7;C9J0Q5;A0A384DVL6;C9JE98	NCOR2_HUMAN	NCOR2	Nuclear receptor corepressor 2	1	TSVLGGGEDGIEPVSPPEGMTEPGHSR	TSVLGGGEDGIEPVS(UniMod:21)PPEGMTEPGHSR	3	TSVLGGGEDGIEPVS(UniMod:21)PPEGMTEPGHSR3	537766	322058	504460
A0A2R8Y4Z8	A0A2R8Y4Z8	A0A2R8Y4Z8_HUMAN	CCDC9	Coiled-coil domain-containing protein 9	1	TTHLAGALSPGGGQSAPAFPESGPSLR	TTHLAGALS(UniMod:21)PGGGQSAPAFPESGPSLR	3	TTHLAGALS(UniMod:21)PGGGQSAPAFPESGPSLR3	50843.5	76331.4	48038.3
P46821	P46821	MAP1B_HUMAN	MAP1B	Microtubule-associated protein 1B	1	TTSPPEVSGYSYEK	TTS(UniMod:21)PPEVSGYSYEK	2	TTS(UniMod:21)PPEVSGYSYEK2	1.22281e+06	1.12471e+06	1.06141e+06
Q9UQ35	Q9UQ35	SRRM2_HUMAN	SRRM2	Serine/arginine repetitive matrix protein 2	1	TVARTPLGQR	TVART(UniMod:21)PLGQR	2	TVART(UniMod:21)PLGQR2	1.0158e+06	897035	904499
Q9UHB6	Q9UHB6;F8VS07;F8VQE1	LIMA1_HUMAN	LIMA1	LIM domain and actin-binding protein 1	1	TVSPPIRK	TVS(UniMod:21)PPIRK	2	TVS(UniMod:21)PPIRK2	937996	924517	790350
O76094	O76094	SRP72_HUMAN	SRP72	Signal recognition particle subunit SRP72	1	TVSSPPTSPRPGSAATVSASTSNIIPPR	TVSS(UniMod:21)PPTS(UniMod:21)PRPGSAATVSASTSNIIPPR	3	TVSS(UniMod:21)PPTS(UniMod:21)PRPGSAATVSASTSNIIPPR3	747922	835948	717126
P16402	P16402	H13_HUMAN	H1-3	Histone H1.3	1	VAGAATPKK	VAGAAT(UniMod:21)PKK	2	VAGAAT(UniMod:21)PKK2	82151.8	60652.2	87776.4
P49321	P49321	NASP_HUMAN	NASP	Nuclear autoantigenic sperm protein	1	VAQGATEKSPEDK	VAQGATEKS(UniMod:21)PEDK	2	VAQGATEKS(UniMod:21)PEDK2	283638	260220	196020
Q96P16	Q96P16;A0A0C4DGQ6	RPR1A_HUMAN	RPRD1A	Regulation of nuclear pre-mRNA domain-containing protein 1A	1	VDENENCSSLGSPSEPPQTLDLVR	VDENENC(UniMod:4)SSLGS(UniMod:21)PSEPPQTLDLVR	3	VDENENC(UniMod:4)SSLGS(UniMod:21)PSEPPQTLDLVR3	659002	743765	660509
Q07955	Q07955;J3KSR8;J3KTL2	SRSF1_HUMAN	SRSF1	Serine/arginine-rich splicing factor 1	1	VDGPRSPSYGR	VDGPRS(UniMod:21)PSYGR	2	VDGPRS(UniMod:21)PSYGR2	2.6295e+06	2.17972e+06	2.07576e+06
Q9H0G5	Q9H0G5;A0A024QZ33	NSRP1_HUMAN	NSRP1	Nuclear speckle splicing regulatory protein 1	1	VEENPDADSDFDAK	VEENPDADS(UniMod:21)DFDAK	2	VEENPDADS(UniMod:21)DFDAK2		156239	196152
Q9H0G5	Q9H0G5;A0A024QZ33	NSRP1_HUMAN	NSRP1	Nuclear speckle splicing regulatory protein 1	1	VEENPDADSDFDAKSSADDEIEETR	VEENPDADS(UniMod:21)DFDAKS(UniMod:21)S(UniMod:21)ADDEIEETR	3	VEENPDADS(UniMod:21)DFDAKS(UniMod:21)S(UniMod:21)ADDEIEETR3	473378	482391	342548
P50851	P50851;A0A494C1L5;A0A494BZW2;E9PEM5;A0A494C0R9	LRBA_HUMAN	LRBA	Lipopolysaccharide-responsive and beige-like anchor protein	1	VEGSPTEEANLPTELQDNSLSPAASEAGEK	VEGSPT(UniMod:21)EEANLPTELQDNSLSPAASEAGEK	3	VEGSPT(UniMod:21)EEANLPTELQDNSLSPAASEAGEK3	303550	326121	373044
P30622	P30622;F5H0N7;A0A3B3ITA2;J3KP58	CLIP1_HUMAN	CLIP1	CAP-Gly domain-containing linker protein 1	1	VEMMSEAALNGNGDDLNNYDSDDQEK	VEMMSEAALNGNGDDLNNYDS(UniMod:21)DDQEK	3	VEMMSEAALNGNGDDLNNYDS(UniMod:21)DDQEK3		483913
Q99590	Q99590;A0A0A0MTP7;F8VXG7	SCAFB_HUMAN	SCAF11	Protein SCAF11	1	VETVSQPSESPK	VETVSQPSES(UniMod:21)PK	2	VETVSQPSES(UniMod:21)PK2	38474.7	60635.9	39527.4
Q8IVF2	Q8IVF2	AHNK2_HUMAN	AHNAK2	Protein AHNAK2	1	VEVTSPNLDVSLPSMEVDIQAPGAK	VEVTSPNLDVS(UniMod:21)LPSMEVDIQAPGAK	3	VEVTSPNLDVS(UniMod:21)LPSMEVDIQAPGAK3	260163	178189	314513
Q9NQ55	Q9NQ55;A0A0A6YYI3;A0A0B4J1V8;H7C446;A8MV53	SSF1_HUMAN	PPAN	Suppressor of SWI4 1 homolog	0	VGGSDEEASGIPSR	VGGS(UniMod:21)DEEASGIPSR	2	VGGS(UniMod:21)DEEASGIPSR2	4.30665e+06	4.19668e+06	3.84509e+06
Q02880	Q02880	TOP2B_HUMAN	TOP2B	DNA topoisomerase 2-beta	1	VKASPITNDGEDEFVPSDGLDK	VKAS(UniMod:21)PITNDGEDEFVPSDGLDK	3	VKAS(UniMod:21)PITNDGEDEFVPSDGLDK3	229336	177951
Q96EV2	Q96EV2;H0Y3K4	RBM33_HUMAN	RBM33	RNA-binding protein 33	1	VKPASPVAQPK	VKPAS(UniMod:21)PVAQPK	2	VKPAS(UniMod:21)PVAQPK2	460728	459712	461329
Q9UQ35	Q9UQ35;I3L4D8;I3L182	SRRM2_HUMAN	SRRM2	Serine/arginine repetitive matrix protein 2	1	VKPETPPR	VKPET(UniMod:21)PPR	2	VKPET(UniMod:21)PPR2	560015	328149	526831
P46821	P46821	MAP1B_HUMAN	MAP1B	Microtubule-associated protein 1B	1	VLSPLRSPPLIGSESAYESFLSADDK	VLSPLRS(UniMod:21)PPLIGSESAYESFLSADDK	3	VLSPLRS(UniMod:21)PPLIGSESAYESFLSADDK3	4.37529e+06	4.49713e+06	4.62499e+06
Q15365	Q15365	PCBP1_HUMAN	PCBP1	Poly(rC)-binding protein 1	1	VMTIPYQPMPASSPVICAGGQDR	VMTIPYQPMPAS(UniMod:21)SPVIC(UniMod:4)AGGQDR	3	VMTIPYQPMPAS(UniMod:21)SPVIC(UniMod:4)AGGQDR3	934653	1.05457e+06	897543
Q8N8A6	Q8N8A6	DDX51_HUMAN	DDX51	ATP-dependent RNA helicase DDX51	1	VNDAEPGSPEAPQGK	VNDAEPGS(UniMod:21)PEAPQGK	2	VNDAEPGS(UniMod:21)PEAPQGK2	216075	291917	198739
Q5JTV8	Q5JTV8;H0YD16;A0A0A0MSK5;J3KN66	TOIP1_HUMAN	TOR1AIP1	Torsin-1A-interacting protein 1	1	VNFSEEGETEEDDQDSSHSSVTTVK	VNFSEEGET(UniMod:21)EEDDQDSSHSSVTTVK	3	VNFSEEGET(UniMod:21)EEDDQDSSHSSVTTVK3	477213	732170	419000
P29966	P29966	MARCS_HUMAN	MARCKS	Myristoylated alanine-rich C-kinase substrate	1	VNGDASPAAAESGAK	VNGDAS(UniMod:21)PAAAESGAK	2	VNGDAS(UniMod:21)PAAAESGAK2	546021	453405	405069
P11388	P11388	TOP2A_HUMAN	TOP2A	DNA topoisomerase 2-alpha	1	VPDEEENEESDNEK	VPDEEENEES(UniMod:21)DNEK	2	VPDEEENEES(UniMod:21)DNEK2	2.46867e+06	2.26823e+06	1.9335e+06
Q8NAV1	Q8NAV1	PR38A_HUMAN	PRPF38A	Pre-mRNA-splicing factor 38A	1	VPSPDHR	VPS(UniMod:21)PDHR	2	VPS(UniMod:21)PDHR2	875955	855636	716086
Q9C0C2	Q9C0C2	TB182_HUMAN	TNKS1BP1	182 kDa tankyrase-1-binding protein	1	VPSSDEEVVEEPQSR	VPS(UniMod:21)S(UniMod:21)DEEVVEEPQSR	2	VPS(UniMod:21)S(UniMod:21)DEEVVEEPQSR2	136424	79643.6	169077
Q13523	Q13523	PRP4B_HUMAN	PRPF4B	Serine/threonine-protein kinase PRP4 homolog	1	VQSGMGLILQGYESGSEEEGEIHEK	VQSGMGLILQGY(UniMod:21)ES(UniMod:21)GSEEEGEIHEK	3	VQSGMGLILQGY(UniMod:21)ES(UniMod:21)GSEEEGEIHEK3	1.07583e+06	1.02469e+06	842834
Q9UDY2	Q9UDY2;A0A3B3IU51;A0A3B3ISZ5;B1AN86;A0A3B3ISF1;A0A1B0GTW1;A0A3B3IRV6;U3KQJ2;A0A3B3ITE1;A0A2R8YDH4;A0A3B3IU26;A0A3B3IRI3	ZO2_HUMAN	TJP2	Tight junction protein ZO-2	1	VQVAALQASPPLDQDDRAFEVMDEFDGR	VQVAALQAS(UniMod:21)PPLDQDDRAFEVMDEFDGR	3	VQVAALQAS(UniMod:21)PPLDQDDRAFEVMDEFDGR3	67538.5		295486
O95365	O95365	ZBT7A_HUMAN	ZBTB7A	Zinc finger and BTB domain-containing protein 7A	1	VRGGAPDPSPGATATPGAPAQPSSPDAR	VRGGAPDPSPGATATPGAPAQPSS(UniMod:21)PDAR	3	VRGGAPDPSPGATATPGAPAQPSS(UniMod:21)PDAR3	206282	118892	250742
Q969V6	Q969V6;A0A494BZX7;W0Z7M9;A0A499FIJ6;E7ER32;A0A087X287	MRTFA_HUMAN	MRTFA	Myocardin-related transcription factor A	1	VSEPLLSATSASPTQVVSQLPMGR	VS(UniMod:21)EPLLSATSASPTQVVSQLPMGR	3	VS(UniMod:21)EPLLSATSASPTQVVSQLPMGR3	116346	94152.2	163463
P46821	P46821	MAP1B_HUMAN	MAP1B	Microtubule-associated protein 1B	1	VSAEAEVAPVSPEVTQEVVEEHCASPEDK	VSAEAEVAPVS(UniMod:21)PEVT(UniMod:21)QEVVEEHC(UniMod:4)ASPEDK	3	VSAEAEVAPVS(UniMod:21)PEVT(UniMod:21)QEVVEEHC(UniMod:4)ASPEDK3	3.5613e+06	3.88018e+06	3.42637e+06
P46821	P46821	MAP1B_HUMAN	MAP1B	Microtubule-associated protein 1B	1	VSAEAEVAPVSPEVTQEVVEEHCASPEDK	VSAEAEVAPVSPEVTQEVVEEHC(UniMod:4)AS(UniMod:21)PEDK	3	VSAEAEVAPVSPEVTQEVVEEHC(UniMod:4)AS(UniMod:21)PEDK3	1.59506e+06	1.57683e+06	1.18298e+06
Q9Y4F1	Q9Y4F1;A0A1B0GV68;C9JME2	FARP1_HUMAN	FARP1	FERM, ARHGEF and pleckstrin domain-containing protein 1	1	VSAGEPGSHPSPAPR	VSAGEPGSHPS(UniMod:21)PAPR	2	VSAGEPGSHPS(UniMod:21)PAPR2	813013	738899	773322
Q8NAV1	Q8NAV1	PR38A_HUMAN	PRPF38A	Pre-mRNA-splicing factor 38A	1	VSALEEDMDDVESSEEEEEEDEK	VSALEEDMDDVES(UniMod:21)S(UniMod:21)EEEEEEDEK	3	VSALEEDMDDVES(UniMod:21)S(UniMod:21)EEEEEEDEK3	186718	168529	101062
Q9UPU5	Q9UPU5	UBP24_HUMAN	USP24	Ubiquitin carboxyl-terminal hydrolase 24	1	VSDQNSPVLPK	VSDQNS(UniMod:21)PVLPK	2	VSDQNS(UniMod:21)PVLPK2	356414	453282	392379
Q9UQ35	Q9UQ35	SRRM2_HUMAN	SRRM2	Serine/arginine repetitive matrix protein 2	1	VSGRTSPPLLDR	VSGRTS(UniMod:21)PPLLDR	2	VSGRTS(UniMod:21)PPLLDR2	5.69841e+06	4.63183e+06	4.81172e+06
Q8IYB3	Q8IYB3;M0R088;A9Z1X7	SRRM1_HUMAN	SRRM1	Serine/arginine repetitive matrix protein 1	1	VSHSPPPK	VSHS(UniMod:21)PPPK	2	VSHS(UniMod:21)PPPK2	224759	199732	176660
O60271	O60271;D6RHI8	JIP4_HUMAN	SPAG9	C-Jun-amino-terminal kinase-interacting protein 4	1	VSNSPEPQK	VSNS(UniMod:21)PEPQK	2	VSNS(UniMod:21)PEPQK2	84130.3	80400
Q96E09	Q96E09	PBIR1_HUMAN	PABIR1	PPP2R1A-PPP2R2A-interacting phosphatase regulator 1	1	VSTTTDSPVSPAQAASPFIPLDELSSK	VSTTTDSPVS(UniMod:21)PAQAASPFIPLDELSSK	3	VSTTTDSPVS(UniMod:21)PAQAASPFIPLDELSSK3	645334	816467	723640
Q96K21	Q96K21;H3BRF9	ANCHR_HUMAN	ZFYVE19	Abscission/NoCut checkpoint regulator	1	VTLQDYRLPDSDDDEDEETAIQR	VTLQDYRLPDS(UniMod:21)DDDEDEETAIQR	3	VTLQDYRLPDS(UniMod:21)DDDEDEETAIQR3	364572	364143	543644
Q8WWI1	Q8WWI1;E9PMS6;E9PMT2;F8WD26;A0A0A0MTE2;J3KP06;E9PMP7;H0Y424	LMO7_HUMAN	LMO7	LIM domain only protein 7	1	VTTEIQLPSQSPVEEQSPASLSSLR	VTTEIQLPS(UniMod:21)QSPVEEQSPASLSSLR	3	VTTEIQLPS(UniMod:21)QSPVEEQSPASLSSLR3	1.12737e+06	1.39499e+06	1.23268e+06
Q9H1E3	Q9H1E3	NUCKS_HUMAN	NUCKS1	Nuclear ubiquitous casein and cyclin-dependent kinase substrate 1	1	VVDYSQFQESDDADEDYGRDSGPPTK	VVDYSQFQES(UniMod:21)DDADEDYGRDS(UniMod:21)GPPTK	3	VVDYSQFQES(UniMod:21)DDADEDYGRDS(UniMod:21)GPPTK3	640679	731067	494636
Q9H1E3	Q9H1E3	NUCKS_HUMAN	NUCKS1	Nuclear ubiquitous casein and cyclin-dependent kinase substrate 1	1	VVDYSQFQESDDADEDYGRDSGPPTK	VVDYSQFQES(UniMod:21)DDADEDYGRDSGPPTK	3	VVDYSQFQES(UniMod:21)DDADEDYGRDSGPPTK3	7.24324e+07	7.16009e+07	6.47187e+07
Q15424;Q14151	Q15424;Q14151	SAFB1_HUMAN;SAFB2_HUMAN	SAFB;SAFB2	Scaffold attachment factor B2	0	VVTNARSPGAR	VVTNARS(UniMod:21)PGAR	2	VVTNARS(UniMod:21)PGAR2	233517	300931	251771
P19338	P19338;A0A7I2V3F3;A0A7I2V349;H7BY16;A0A7I2V2S8;A0A7I2V5M5;A0A7I2V506;A0A7I2V2U7;C9JLB1;A0A7I2V699;A0A7I2V428	NUCL_HUMAN	NCL	Nucleolin	1	VVVSPTKK	VVVS(UniMod:21)PTKK	2	VVVS(UniMod:21)PTKK2	526492	389055	531708
Q96T60	Q96T60;M0R3C8;A0A0D9SFD6;M0QYI1;A0A0D9SEV0;A0A0D9SFL2;M0QYH2;M0R000	PNKP_HUMAN	PNKP	Bifunctional polynucleotide phosphatase/kinase	1	WEETRTPESQPDTPPGTPLVSQDEK	WEETRTPESQPDT(UniMod:21)PPGTPLVSQDEK	3	WEETRTPESQPDT(UniMod:21)PPGTPLVSQDEK3	281356	260685	248571
P42167	P42167;G5E972;H0YJH7	LAP2B_HUMAN	TMPO	Lamina-associated polypeptide 2, isoforms beta/gamma	1	YSDNEEDSKIELK	Y(UniMod:21)S(UniMod:21)DNEEDSKIELK	2	Y(UniMod:21)S(UniMod:21)DNEEDSKIELK2	84149.1	90340.7	88680.1
O15013	O15013	ARHGA_HUMAN	ARHGEF10	Rho guanine nucleotide exchange factor 10	1	YDTNNNEEEEGEQFDFDSGDEIPEADR	YDTNNNEEEEGEQFDFDS(UniMod:21)GDEIPEADR	3	YDTNNNEEEEGEQFDFDS(UniMod:21)GDEIPEADR3	785006	925494	856383
A0A7I2V647	Q9UN86;A0A7I2YQD9;A0A7I2V647;A0A7I2YQS2;A0A7I2V3E2;A0A7I2V3P9;D6RB17	A0A7I2V647_HUMAN	G3BP2	Ras GTPase-activating protein-binding protein 2	1	YEDEVFGDSEPELDEESEDEVEEEQEER	YEDEVFGDS(UniMod:21)EPELDEES(UniMod:21)EDEVEEEQEER	3	YEDEVFGDS(UniMod:21)EPELDEES(UniMod:21)EDEVEEEQEER3	244086	202982	185011
Q04323	Q04323;A0A087WTZ5;E9PJ81;E9PRQ7;E9PS08	UBXN1_HUMAN	UBXN1	UBX domain-containing protein 1	1	YGGSVGSQPPPVAPEPGPVPSSPSQEPPTK	YGGSVGSQPPPVAPEPGPVPSS(UniMod:21)PSQEPPTK	3	YGGSVGSQPPPVAPEPGPVPSS(UniMod:21)PSQEPPTK3	937728	1.26911e+06	1.05571e+06
Q9BVV8	Q9BVV8	F174C_HUMAN	FAM174C	Protein FAM174C	1	YGLLANTEDPTEMASLDSDEETVFESR	YGLLANTEDPT(UniMod:21)EMASLDS(UniMod:21)DEETVFESR	3	YGLLANTEDPT(UniMod:21)EMASLDS(UniMod:21)DEETVFESR3	161537	61490.9	96837.1
O95218	O95218	ZRAB2_HUMAN	ZRANB2	Zinc finger Ran-binding domain-containing protein 2	1	YNLDASEEEDSNKK	YNLDAS(UniMod:21)EEEDSNKK	2	YNLDAS(UniMod:21)EEEDSNKK2	1.33325e+06	1.17859e+06	1.21995e+06
P41236;Q6NXS1	P41236;Q6NXS1;E7EMN6	IPP2B_HUMAN;IPP2_HUMAN	PPP1R2;PPP1R2B	Protein phosphatase inhibitor 2	0	YRIQEQESSGEEDSDLSPEER	YRIQEQES(UniMod:21)S(UniMod:21)GEEDSDLSPEER	3	YRIQEQES(UniMod:21)S(UniMod:21)GEEDSDLSPEER3	362547	309731	253669
Q14498	Q14498;Q5QP23;Q5QP22;G3XAC6	RBM39_HUMAN	RBM39	RNA-binding protein 39	1	YRSPYSGPK	YRS(UniMod:21)PYSGPK	2	YRS(UniMod:21)PYSGPK2	1.54562e+06	1.65341e+06	1.44285e+06
Q9UQ35	Q9UQ35;I3L4D8;I3L182	SRRM2_HUMAN	SRRM2	Serine/arginine repetitive matrix protein 2	1	YSHSGSSSPDTK	YSHSGSS(UniMod:21)S(UniMod:21)PDTK	2	YSHSGSS(UniMod:21)S(UniMod:21)PDTK2	316400	244602	220146
Q9UQ35	Q9UQ35;I3L4D8;I3L182	SRRM2_HUMAN	SRRM2	Serine/arginine repetitive matrix protein 2	1	YSHSGSSSPDTK	YSHSGSSS(UniMod:21)PDTK	2	YSHSGSSS(UniMod:21)PDTK2	95083.8	164767	177907
Q02880	Q02880	TOP2B_HUMAN	TOP2B	DNA topoisomerase 2-beta	1	YTFDFSEEEDDDADDDDDDNNDLEELK	YTFDFS(UniMod:21)EEEDDDADDDDDDNNDLEELK	3	YTFDFS(UniMod:21)EEEDDDADDDDDDNNDLEELK3	945730	1.05933e+06	807563
Q8N9T8	Q8N9T8;A0A494C108;F8WFC1;H0YFD2;H0YH26	KRI1_HUMAN	KRI1	Protein KRI1 homolog	1	YVDEENSDGETSNHR	YVDEENS(UniMod:21)DGETSNHR	2	YVDEENS(UniMod:21)DGETSNHR2	666875	638166	475941
Q8WVC0	Q8WVC0	LEO1_HUMAN	LEO1	RNA polymerase-associated protein LEO1	1	YVISDEEEEDDD	YVIS(UniMod:21)DEEEEDDD	2	YVIS(UniMod:21)DEEEEDDD2		920312

## Sheet: 10000cells
Protein.Group	Protein.Ids	Protein.Names	Genes	First.Protein.Description	Proteotypic	Stripped.Sequence	Modified.Sequence	Precursor.Charge	Precursor.Id	G:\WUCI\1E4_1_DIA.raw	G:\WUCI\1E4_2_DIA.raw	G:\WUCI\1E4_3_DIA.raw
O75822	O75822	EIF3J_HUMAN	EIF3J	Eukaryotic translation initiation factor 3 subunit J	1	AAAAAAAGDSDSWDADAFSVEDPVR	AAAAAAAGDS(UniMod:21)DS(UniMod:21)WDADAFSVEDPVR	3	AAAAAAAGDS(UniMod:21)DS(UniMod:21)WDADAFSVEDPVR3	76740.3	24989.6	75258.4
Q96GM8	Q96GM8	TOE1_HUMAN	TOE1	Target of EGR1 protein 1	1	AADSDDGAVSAPAASDGGVSK	AADS(UniMod:21)DDGAVSAPAASDGGVSK	3	AADS(UniMod:21)DDGAVSAPAASDGGVSK3	62761.9	52205.5
P12270	P12270	TPR_HUMAN	TPR	Nucleoprotein TPR	1	AADSQNSGEGNTGAAESSFSQEVSR	AADS(UniMod:21)QNSGEGNTGAAESSFSQEVSR	3	AADS(UniMod:21)QNSGEGNTGAAESSFSQEVSR3	192627	186526	231749
Q1KMD3	Q1KMD3;H3BQZ7	HNRL2_HUMAN	HNRNPUL2	Heterogeneous nuclear ribonucleoprotein U-like protein 2	0	AAEEQGDDQDSEK	AAEEQGDDQDS(UniMod:21)EK	2	AAEEQGDDQDS(UniMod:21)EK2	2.50416e+06	2.86812e+06	2.55346e+06
O76021	O76021;J3QSV6	RL1D1_HUMAN	RSL1D1	Ribosomal L1 domain-containing protein 1	1	AAESETPGKSPEK	AAESET(UniMod:21)PGKS(UniMod:21)PEK	2	AAESET(UniMod:21)PGKS(UniMod:21)PEK2	1.00584e+06	1.19911e+06	1.24593e+06
O76021	O76021;J3QSV6	RL1D1_HUMAN	RSL1D1	Ribosomal L1 domain-containing protein 1	1	AAESETPGKSPEK	AAESETPGKS(UniMod:21)PEK	2	AAESETPGKS(UniMod:21)PEK2	5.00324e+06	5.83771e+06	6.22202e+06
Q14676	Q14676	MDC1_HUMAN	MDC1	Mediator of DNA damage checkpoint protein 1	1	AAESLTAIPEPASPQLLETPIHASQIQK	AAESLTAIPEPAS(UniMod:21)PQLLETPIHASQIQK	3	AAESLTAIPEPAS(UniMod:21)PQLLETPIHASQIQK3	853223	1.12769e+06	848310
Q4KMP7	Q4KMP7	TB10B_HUMAN	TBC1D10B	TBC1 domain family member 10B	1	AAGGAPSPPPPVR	AAGGAPS(UniMod:21)PPPPVR	2	AAGGAPS(UniMod:21)PPPPVR2	571994	665829	630060
Q4KMP7	Q4KMP7	TB10B_HUMAN	TBC1D10B	TBC1 domain family member 10B	1	AAGGAPSPPPPVRR	AAGGAPS(UniMod:21)PPPPVRR	2	AAGGAPS(UniMod:21)PPPPVRR2	1.26259e+06	1.18772e+06	928699
Q96KM6	Q96KM6	Z512B_HUMAN	ZNF512B	Zinc finger protein 512B	1	AAGPASPPEEDPER	AAGPAS(UniMod:21)PPEEDPER	2	AAGPAS(UniMod:21)PPEEDPER2	321881	451934	232871
Q9UKV3	Q9UKV3;E7EQT4;S4R3H4	ACINU_HUMAN	ACIN1	Apoptotic chromatin condensation inducer in the nucleus	1	AAKLSEGSQPAEEEEDQETPSR	AAKLS(UniMod:21)EGS(UniMod:21)QPAEEEEDQETPSR	3	AAKLS(UniMod:21)EGS(UniMod:21)QPAEEEEDQETPSR3	234064	371292	322514
P46821	P46821	MAP1B_HUMAN	MAP1B	Microtubule-associated protein 1B	1	AAKPTTTPEVK	AAKPTTT(UniMod:21)PEVK	2	AAKPTTT(UniMod:21)PEVK2		122175	39914.8
Q13428	Q13428;H0Y8Y7;H0YAB7;E7ETY2;A0A6I8PRA0;A0A3B3IS06	TCOF_HUMAN	TCOF1	Treacle protein	1	AALAPAKESPR	AALAPAKES(UniMod:21)PR	2	AALAPAKES(UniMod:21)PR2	310577	392519	396812
O95772	O95772;C9JKL2	STR3N_HUMAN	STARD3NL	STARD3 N-terminal-like protein	1	AALIPGGLSDGQFYSPPESEAGSEEAEEK	AALIPGGLSDGQFYSPPES(UniMod:21)EAGS(UniMod:21)EEAEEK	3	AALIPGGLSDGQFYSPPES(UniMod:21)EAGS(UniMod:21)EEAEEK3	301487	347210	387470
Q9H0S4	Q9H0S4;F5H1N9	DDX47_HUMAN	DDX47	Probable ATP-dependent RNA helicase DDX47	1	AAPEEHDSPTEASQPIVEEEETK	AAPEEHDS(UniMod:21)PT(UniMod:21)EASQPIVEEEETK	3	AAPEEHDS(UniMod:21)PT(UniMod:21)EASQPIVEEEETK3	813388	854252	903327
O75694	O75694;E9PF10	NU155_HUMAN	NUP155	Nuclear pore complex protein Nup155	1	AAPQSPSVPK	AAPQS(UniMod:21)PSVPK	2	AAPQS(UniMod:21)PSVPK2	2.78006e+06	2.9539e+06	2.88131e+06
P39880	P39880;A0A2R8Y852;A0A2R8YDI1	CUX1_HUMAN	CUX1	Homeobox protein cut-like 1	1	AAPSSEGDSCDGVEATEGPGSADTEEPK	AAPS(UniMod:21)SEGDS(UniMod:21)C(UniMod:4)DGVEATEGPGSADTEEPK	3	AAPS(UniMod:21)SEGDS(UniMod:21)C(UniMod:4)DGVEATEGPGSADTEEPK3	301087	478073	230636
Q86U86	Q86U86	PB1_HUMAN	PBRM1	Protein polybromo-1	1	AAQQQQPSASPR	AAQQQQPSAS(UniMod:21)PR	2	AAQQQQPSAS(UniMod:21)PR2	457913	517921	534638
Q7L4I2	Q7L4I2;E9PI52	RSRC2_HUMAN	RSRC2	Arginine/serine-rich coiled-coil protein 2	1	AASDTERDGLAPEK	AAS(UniMod:21)DTERDGLAPEK	2	AAS(UniMod:21)DTERDGLAPEK2	817316	1.16976e+06	1.14441e+06
A0A494C1D7	A0A494C1D7	A0A494C1D7_HUMAN	DST	Dystonin (Fragment)	1	AASLSSIPSGIER	AAS(UniMod:21)LSSIPSGIER	2	AAS(UniMod:21)LSSIPSGIER2	282722	319589	270252
Q04637	Q04637;E7EX73;E9PGM1;E7EUU4;A0A7I2Y1C3	IF4G1_HUMAN	EIF4G1	Eukaryotic translation initiation factor 4 gamma 1	1	AASLTEDRDR	AAS(UniMod:21)LTEDRDR	2	AAS(UniMod:21)LTEDRDR2	1.19178e+07	1.21524e+07	1.1485e+07
A9Z1X7	Q8IYB3;A9Z1X7	A9Z1X7_HUMAN	SRRM1	Serine/arginine repetitive matrix protein 1	1	AASPSPQSVR	AAS(UniMod:21)PS(UniMod:21)PQSVR	2	AAS(UniMod:21)PS(UniMod:21)PQSVR2	1.26555e+07	1.3779e+07	1.16137e+07
A9Z1X7	Q8IYB3;A9Z1X7	A9Z1X7_HUMAN	SRRM1	Serine/arginine repetitive matrix protein 1	1	AASPSPQSVR	AAS(UniMod:21)PSPQSVR	2	AAS(UniMod:21)PSPQSVR2	2.86113e+06	2.79937e+06	2.64021e+06
Q13428	Q13428;H0Y8Y7;E7ETY2;A0A6I8PRA0;A0A3B3IS06	TCOF_HUMAN	TCOF1	Treacle protein	1	AASAPAKESPR	AASAPAKES(UniMod:21)PR	2	AASAPAKES(UniMod:21)PR2	447506	496006	520664
Q5VSL9	Q5VSL9	STRP1_HUMAN	STRIP1	Striatin-interacting protein 1	1	AASPPASASDLIEQQQK	AASPPAS(UniMod:21)ASDLIEQQQK	3	AASPPAS(UniMod:21)ASDLIEQQQK3	853259	916802	674270
Q92538	Q92538;A0A669KBG8;A0A7I2V350;A0A669KB10;A0A7I2V452;A0A7I2V2L5;A0A7I2YQ65;A0A7I2V514;A0A7I2YQM2;A0A7I2V3E5;A0A7P0RGV0	GBF1_HUMAN	GBF1	Golgi-specific brefeldin A-resistance guanine nucleotide exchange factor 1	1	AASSSSPGSPVASSPSR	AASSSSPGS(UniMod:21)PVASSPSR	2	AASSSSPGS(UniMod:21)PVASSPSR2	418475	420252	367473
Q96ST2	Q96ST2	IWS1_HUMAN	IWS1	Protein IWS1 homolog	1	AAVLSDSEDEEK	AAVLS(UniMod:21)DS(UniMod:21)EDEEK	2	AAVLS(UniMod:21)DS(UniMod:21)EDEEK2	1.61402e+07	2.08073e+07	1.8998e+07
Q96ST2	Q96ST2	IWS1_HUMAN	IWS1	Protein IWS1 homolog	1	AAVLSDSEDEEK	AAVLSDS(UniMod:21)EDEEK	2	AAVLSDS(UniMod:21)EDEEK2	905268	877984	934938
P49768	P49768;E7ES96	PSN1_HUMAN	PSEN1	Presenilin-1	1	AAVQELSSSILAGEDPEER	AAVQELSS(UniMod:21)SILAGEDPEER	3	AAVQELSS(UniMod:21)SILAGEDPEER3	172602	262717	299919
O15541	O15541	R113A_HUMAN	RNF113A	E3 ubiquitin-protein ligase RNF113A	1	AAYGDLSSEEEEENEPESLGVVYK	AAYGDLS(UniMod:21)S(UniMod:21)EEEEENEPESLGVVYK	3	AAYGDLS(UniMod:21)S(UniMod:21)EEEEENEPESLGVVYK3	5.18991e+06	5.97064e+06	5.67659e+06
Q9UFC0	Q9UFC0;F8WDB4	LRWD1_HUMAN	LRWD1	Leucine-rich repeat and WD repeat-containing protein 1	1	ACASPSAQVEGSPVAGSDGSQPAVK	AC(UniMod:4)ASPSAQVEGS(UniMod:21)PVAGSDGSQPAVK	3	AC(UniMod:4)ASPSAQVEGS(UniMod:21)PVAGSDGSQPAVK3	210880	256321	149717
Q92538	Q92538;A0A669KBG8;A0A7I2V3Y5;A0A7I2V4K2;A0A669KB10;A0A7I2V452;A0A7I2V2L4;A0A7I2V2L5;A0A7I2V529;A0A7I2YQ65;A0A7I2V514;A0A7I2YQM2;A0A7P0RGV0	GBF1_HUMAN	GBF1	Golgi-specific brefeldin A-resistance guanine nucleotide exchange factor 1	1	ADAPDAGAQSDSELPSYHQNDVSLDR	ADAPDAGAQS(UniMod:21)DSELPSYHQNDVSLDR	3	ADAPDAGAQS(UniMod:21)DSELPSYHQNDVSLDR3	1.60993e+07	1.70652e+07	1.7859e+07
Q3YEC7	Q3YEC7	RABL6_HUMAN	RABL6	Rab-like protein 6	1	ADDFPVRDDPSDVTDEDEGPAEPPPPPK	ADDFPVRDDPS(UniMod:21)DVT(UniMod:21)DEDEGPAEPPPPPK	3	ADDFPVRDDPS(UniMod:21)DVT(UniMod:21)DEDEGPAEPPPPPK3	3.51072e+06	4.08927e+06	3.86941e+06
P49327	P49327;A0A0U1RQF0	FAS_HUMAN	FASN	Fatty acid synthase	1	ADEASELACPTPKEDGLAQQQTQLNLR	ADEASELAC(UniMod:4)PT(UniMod:21)PKEDGLAQQQTQLNLR	3	ADEASELAC(UniMod:4)PT(UniMod:21)PKEDGLAQQQTQLNLR3	2.66255e+06	2.95782e+06	3.01735e+06
P50502	P50502;Q8IZP2;F6VDH7	F10A1_HUMAN	ST13	Hsc70-interacting protein	0	ADEPSSEESDLEIDK	ADEPS(UniMod:21)S(UniMod:21)EES(UniMod:21)DLEIDK	2	ADEPS(UniMod:21)S(UniMod:21)EES(UniMod:21)DLEIDK2	7.21333e+07	8.82045e+07	6.1499e+07
P50502	P50502;Q8IZP2;F6VDH7	F10A1_HUMAN	ST13	Hsc70-interacting protein	0	ADEPSSEESDLEIDK	ADEPSS(UniMod:21)EES(UniMod:21)DLEIDK	2	ADEPSS(UniMod:21)EES(UniMod:21)DLEIDK2	4.90679e+07	6.00031e+07	5.68375e+07
Q09666	Q09666	AHNK_HUMAN	AHNAK	Neuroblast differentiation-associated protein AHNAK	1	ADLDVSGPKVDIDVPDVNIEGPDAK	ADLDVS(UniMod:21)GPKVDIDVPDVNIEGPDAK	3	ADLDVS(UniMod:21)GPKVDIDVPDVNIEGPDAK3	258982	264964	285847
Q8WUA4	Q8WUA4;H7C318;H0Y4Q6	TF3C2_HUMAN	GTF3C2	General transcription factor 3C polypeptide 2	1	ADLIPYQDSPEGPDHSSASSGVPNPPK	ADLIPYQDSPEGPDHSSASS(UniMod:21)GVPNPPK	3	ADLIPYQDSPEGPDHSSASS(UniMod:21)GVPNPPK3	270932	211100	83942.7
Q96C19	Q96C19	EFHD2_HUMAN	EFHD2	EF-hand domain-containing protein D2	1	ADLNQGIGEPQSPSR	ADLNQGIGEPQSPS(UniMod:21)R	2	ADLNQGIGEPQSPS(UniMod:21)R2	184513	189743	135541
Q13427	Q13427;A0A7I2V629;E9PG73;A0A7I2V4F2;A0A7I2V5Q5	PPIG_HUMAN	PPIG	Peptidyl-prolyl cis-trans isomerase G	1	ADRDQSPFSK	ADRDQS(UniMod:21)PFSK	2	ADRDQS(UniMod:21)PFSK2	1.28369e+06	1.23862e+06	1.31642e+06
Q96HH9	Q96HH9;D6REP5;E9PD09;B7Z4W8	GRM2B_HUMAN	GRAMD2B	GRAM domain-containing protein 2B	1	ADRPSSLPLDFNDEFSDLDGVVQQR	ADRPSSLPLDFNDEFS(UniMod:21)DLDGVVQQR	3	ADRPSSLPLDFNDEFS(UniMod:21)DLDGVVQQR3	361822	337736	405657
P25440	P25440;A0A140T9F7;A0A0G2JK44;U3KPW0;U3KQA6;A0A140T9V2;H0Y6K2;A0A140T9E9;A0A0G2JHL0;H0YDJ7;E9PIQ3	BRD2_HUMAN	BRD2	Bromodomain-containing protein 2	1	ADTTTPTPTAILAPGSPASPPGSLEPK	ADTTTPTPTAILAPGS(UniMod:21)PAS(UniMod:21)PPGSLEPK	3	ADTTTPTPTAILAPGS(UniMod:21)PAS(UniMod:21)PPGSLEPK3	2.36559e+06	2.61671e+06	2.43998e+06
P49815	P49815;X5D2U8;A0A2R8YGU4;A0A2R8YDZ2;A0A2R8Y6C9;A0A2R8Y7X5;A0A2R8YDR3;A0A2R8Y7C8;A0A2R8Y5F1;H3BMQ0;A0A2R8YGD6;A0A2R8Y670;H3BQK4	TSC2_HUMAN	TSC2	Tuberin	1	ADVGRLSPEVK	ADVGRLS(UniMod:21)PEVK	2	ADVGRLS(UniMod:21)PEVK2	1.35328e+06	1.23933e+06	1.31582e+06
P51636	P51636;E9PCT3	CAV2_HUMAN	CAV2	Caveolin-2	1	ADVQLFMDDDSYSHHSGLEYADPEK	ADVQLFMDDDS(UniMod:21)Y(UniMod:21)SHHSGLEYADPEK	3	ADVQLFMDDDS(UniMod:21)Y(UniMod:21)SHHSGLEYADPEK3	1.24997e+07	1.33456e+07	1.49783e+07
P51636	P51636;E9PCT3	CAV2_HUMAN	CAV2	Caveolin-2	1	ADVQLFMDDDSYSHHSGLEYADPEK	ADVQLFMDDDSYS(UniMod:21)HHSGLEYADPEK	3	ADVQLFMDDDSYS(UniMod:21)HHSGLEYADPEK3	1.28673e+06	1.08563e+06	1.3767e+06
Q9GZR7	Q9GZR7;A0A1W2PRR2;G3V529;F5GYL3	DDX24_HUMAN	DDX24	ATP-dependent RNA helicase DDX24	1	AEAESDALPDDTVIESEALPSDIAAEAR	AEAES(UniMod:21)DALPDDTVIESEALPSDIAAEAR	3	AEAES(UniMod:21)DALPDDTVIESEALPSDIAAEAR3	175327	245796	159265
Q09666	Q09666	AHNK_HUMAN	AHNAK	Neuroblast differentiation-associated protein AHNAK	1	AEAPLPSPK	AEAPLPS(UniMod:21)PK	2	AEAPLPS(UniMod:21)PK2	3.0373e+06	2.99075e+06	3.09619e+06
Q9P1Y6	Q9P1Y6;B7ZM65;A0A0J9YYB5;E9PJ24;F8WEF5;A0A0J9YWD5;A0A0J9YX88	PHRF1_HUMAN	PHRF1	PHD and RING finger domain-containing protein 1	1	AEAPSSPDVAPAGK	AEAPS(UniMod:21)S(UniMod:21)PDVAPAGK	2	AEAPS(UniMod:21)S(UniMod:21)PDVAPAGK2	194523	243190	303418
Q9P1Y6	Q9P1Y6;B7ZM65;A0A0J9YYB5;E9PJ24;F8WEF5;A0A0J9YWD5;A0A0J9YX88	PHRF1_HUMAN	PHRF1	PHD and RING finger domain-containing protein 1	1	AEAPSSPDVAPAGK	AEAPSS(UniMod:21)PDVAPAGK	2	AEAPSS(UniMod:21)PDVAPAGK2	462133	564546	669725
P29966	P29966	MARCS_HUMAN	MARCKS	Myristoylated alanine-rich C-kinase substrate	1	AEDGATPSPSNETPK	AEDGATPS(UniMod:21)PSNET(UniMod:21)PK	2	AEDGATPS(UniMod:21)PSNET(UniMod:21)PK2	1.32723e+06	1.41157e+06	1.34643e+06
P29966	P29966	MARCS_HUMAN	MARCKS	Myristoylated alanine-rich C-kinase substrate	1	AEDGATPSPSNETPK	AEDGATPS(UniMod:21)PSNETPK	2	AEDGATPS(UniMod:21)PSNETPK2	5.52453e+06	6.35821e+06	6.07216e+06
P29966	P29966	MARCS_HUMAN	MARCKS	Myristoylated alanine-rich C-kinase substrate	1	AEDGATPSPSNETPK	AEDGATPSPSNET(UniMod:21)PK	2	AEDGATPSPSNET(UniMod:21)PK2	1.40081e+07	1.54888e+07	1.50331e+07
P29966	P29966	MARCS_HUMAN	MARCKS	Myristoylated alanine-rich C-kinase substrate	1	AEDGATPSPSNETPKK	AEDGATPSPSNET(UniMod:21)PKK	2	AEDGATPSPSNET(UniMod:21)PKK2	3.63598e+06	4.24716e+06	4.91888e+06
Q9H0D6	Q9H0D6	XRN2_HUMAN	XRN2	5'-3' exoribonuclease 2	1	AEDSDSEPEPEDNVR	AEDS(UniMod:21)DS(UniMod:21)EPEPEDNVR	2	AEDS(UniMod:21)DS(UniMod:21)EPEPEDNVR2	625908	714229	715494
P27824	P27824;A0A7P0TAE9;A0A7P0TB65;D6RGY2;A0A7P0T937;A0A7P0Z484	CALX_HUMAN	CANX	Calnexin	1	AEEDEILNRSPR	AEEDEILNRS(UniMod:21)PR	2	AEEDEILNRS(UniMod:21)PR2	2.70368e+08	2.99025e+08	3.54229e+08
Q15459	Q15459;H7C1L2	SF3A1_HUMAN	SF3A1	Splicing factor 3A subunit 1	1	AEEPPSQLDQDTQVQDMDEGSDDEEEGQK	AEEPPSQLDQDTQVQDMDEGS(UniMod:21)DDEEEGQK	3	AEEPPSQLDQDTQVQDMDEGS(UniMod:21)DDEEEGQK3	3.57632e+07	3.38052e+07	3.69595e+07
Q6WCQ1	Q6WCQ1;J3KSW8;A0A494BZV2;A0A1W2PPU9	MPRIP_HUMAN	MPRIP	Myosin phosphatase Rho-interacting protein	1	AEEQQLPPPLSPPSPSTPNHR	AEEQQLPPPLS(UniMod:21)PPS(UniMod:21)PSTPNHR	3	AEEQQLPPPLS(UniMod:21)PPS(UniMod:21)PSTPNHR3	1.86721e+06	2.4251e+06	2.65768e+06
Q6WCQ1	Q6WCQ1;J3KSW8;A0A494BZV2;A0A1W2PPU9	MPRIP_HUMAN	MPRIP	Myosin phosphatase Rho-interacting protein	1	AEEQQLPPPLSPPSPSTPNHR	AEEQQLPPPLS(UniMod:21)PPSPST(UniMod:21)PNHR	3	AEEQQLPPPLS(UniMod:21)PPSPST(UniMod:21)PNHR3		2.49731e+06
P80723	P80723;U3KQP0	BASP1_HUMAN	BASP1	Brain acid soluble protein 1	1	AEGAATEEEGTPK	AEGAATEEEGT(UniMod:21)PK	2	AEGAATEEEGT(UniMod:21)PK2	2.60388e+06	2.81707e+06	2.8322e+06
P80723	P80723	BASP1_HUMAN	BASP1	Brain acid soluble protein 1	1	AEGAATEEEGTPKESEPQAAAEPAEAK	AEGAATEEEGT(UniMod:21)PKESEPQAAAEPAEAK	3	AEGAATEEEGT(UniMod:21)PKESEPQAAAEPAEAK3	202336
Q9NYD6	Q9NYD6;D6RAG4	HXC10_HUMAN	HOXC10	Homeobox protein Hox-C10	1	AEHLESPQLGGK	AEHLES(UniMod:21)PQLGGK	2	AEHLES(UniMod:21)PQLGGK2	112142	108666
P51532	P51532;A0A2R8Y4C5;A0A2R8YG32;A0A2R8Y6V2;A0A2R8YDA1;A0A2R8YF58;A0A2R8Y440;A0A2R8YGP5;A0A2R8Y7R0;Q9HBD4;A0A2R8Y526;A0A2R8Y7F3;A0A2R8Y4P4;A0A2R8Y6N0;A0A2R8YF80;A0A2R8Y7Y7;A0A2R8Y7S2;A0A2R8YGG3	SMCA4_HUMAN	SMARCA4	Transcription activator BRG1	1	AENAEGQTPAIGPDGEPLDETSQMSDLPVK	AENAEGQTPAIGPDGEPLDETS(UniMod:21)QMS(UniMod:21)DLPVK	3	AENAEGQTPAIGPDGEPLDETS(UniMod:21)QMS(UniMod:21)DLPVK3	1.11435e+06	1.41567e+06	1.13405e+06
Q5STZ8	Q8NE71;Q5STZ8;A0A0G2JJB9	Q5STZ8_HUMAN	ABCF1	ATP-binding cassette sub-family F member 1	1	AEQGSEEEGEGEEEEEEGGESK	AEQGS(UniMod:21)EEEGEGEEEEEEGGESK	3	AEQGS(UniMod:21)EEEGEGEEEEEEGGESK3	859780	1.12461e+06	1.54295e+06
Q9BUA3	Q9BUA3	SPNDC_HUMAN	SPINDOC	Spindlin interactor and repressor of chromatin-binding protein	1	AEQPSPPNSDSGQDAHPDPDANPDAAR	AEQPS(UniMod:21)PPNS(UniMod:21)DSGQDAHPDPDANPDAAR	3	AEQPS(UniMod:21)PPNS(UniMod:21)DSGQDAHPDPDANPDAAR3	1.96705e+06	2.43655e+06	2.37054e+06
Q9BUA3	Q9BUA3	SPNDC_HUMAN	SPINDOC	Spindlin interactor and repressor of chromatin-binding protein	1	AEQPSPPNSDSGQDAHPDPDANPDAAR	AEQPSPPNS(UniMod:21)DS(UniMod:21)GQDAHPDPDANPDAAR	3	AEQPSPPNS(UniMod:21)DS(UniMod:21)GQDAHPDPDANPDAAR3
O75691	O75691	UTP20_HUMAN	UTP20	Small subunit processome component 20 homolog	1	AESDGEEKEEVK	AES(UniMod:21)DGEEKEEVK	2	AES(UniMod:21)DGEEKEEVK2		1.02033e+06	966208
Q7Z6Z7	Q7Z6Z7	HUWE1_HUMAN	HUWE1	E3 ubiquitin-protein ligase HUWE1	1	AESPEEVACR	AES(UniMod:21)PEEVAC(UniMod:4)R	2	AES(UniMod:21)PEEVAC(UniMod:4)R2	885053	957965	866595
Q86VX9	Q86VX9;A0A0A0MSQ9	MON1A_HUMAN	MON1A	Vacuolar fusion protein MON1 homolog A	1	AESPTPGMAQGMEPGAGQEGAMFVHAR	AES(UniMod:21)PTPGMAQGMEPGAGQEGAMFVHAR	3	AES(UniMod:21)PTPGMAQGMEPGAGQEGAMFVHAR3	348516	481469	517519
Q5T8D3	Q5T8D3;A0A7I2YQS1;A0A7I2YQJ9;A0A7I2V5U2;A0A7I2V5L4;A0A7I2V5E1;A0A7I2V462;X6RDD7;A0A7I2V2Y9;A0A7I2V420;A0A7I2V556;A0A7I2YQE9;A0A7I2V690;Q5T8E0;A0A7I2V560;A0A7I2V347;A0A7I2YQD7;B7Z2R7	ACBD5_HUMAN	ACBD5	Acyl-CoA-binding domain-containing protein 5	1	AESSDSGAESEEEEAQEEVK	AES(UniMod:21)S(UniMod:21)DSGAESEEEEAQEEVK	3	AES(UniMod:21)S(UniMod:21)DSGAESEEEEAQEEVK3		415773	209990
P46821	P46821	MAP1B_HUMAN	MAP1B	Microtubule-associated protein 1B	1	AETEEAEEPEEDGEEHVCVSASK	AET(UniMod:21)EEAEEPEEDGEEHVC(UniMod:4)VSASK	3	AET(UniMod:21)EEAEEPEEDGEEHVC(UniMod:4)VSASK3	178324	242546	354508
Q9NUA8	Q9NUA8;F8WAI8;B1AKC8;A0A3B3IRZ6	ZBT40_HUMAN	ZBTB40	Zinc finger and BTB domain-containing protein 40	1	AETEEAAHSVSQEMSVNSPTAQESQR	AETEEAAHSVSQEMSVNS(UniMod:21)PTAQESQR	3	AETEEAAHSVSQEMSVNS(UniMod:21)PTAQESQR3	429802	538474	555870
Q9BVS4	Q9BVS4	RIOK2_HUMAN	RIOK2	Serine/threonine-protein kinase RIO2	1	AEVYGSENESER	AEVYGS(UniMod:21)ENESER	2	AEVYGS(UniMod:21)ENESER2	490679	497300	471131
P21333	P21333;Q60FE5	FLNA_HUMAN	FLNA	Filamin-A	1	AFGPGLQGGSAGSPAR	AFGPGLQGGSAGS(UniMod:21)PAR	2	AFGPGLQGGSAGS(UniMod:21)PAR2	8.69253e+06	9.61645e+06	9.38404e+06
O60293	O60293	ZC3H1_HUMAN	ZFC3H1	Zinc finger C3H1 domain-containing protein	1	AFKPEETSSNSDPPSPPVLNNSHPVPR	AFKPEETSSNSDPPS(UniMod:21)PPVLNNSHPVPR	3	AFKPEETSSNSDPPS(UniMod:21)PPVLNNSHPVPR3	69360.9	267077	191674
Q8N9T8	Q8N9T8;A0A494C108;F8WFC1;H0YFD2	KRI1_HUMAN	KRI1	Protein KRI1 homolog	1	AFVEDSEDEDGAGEGGSSLLQK	AFVEDS(UniMod:21)EDEDGAGEGGSSLLQK	3	AFVEDS(UniMod:21)EDEDGAGEGGSSLLQK3	1.42088e+06	1.61623e+06	1.43616e+06
O95365	O95365	ZBT7A_HUMAN	ZBTB7A	Zinc finger and BTB domain-containing protein 7A	1	AGAAAGDSDEESRADDK	AGAAAGDS(UniMod:21)DEESRADDK	2	AGAAAGDS(UniMod:21)DEESRADDK2	1.12934e+06	1.38729e+06	1.52525e+06
Q6ZRS2	Q6ZRS2;A0A0A0MS59;A0A0C4DFX4	SRCAP_HUMAN	SRCAP	Helicase SRCAP	1	AGAPVGGSPGLAK	AGAPVGGS(UniMod:21)PGLAK	2	AGAPVGGS(UniMod:21)PGLAK2	106184	130757
P51858	P51858	HDGF_HUMAN	HDGF	Hepatoma-derived growth factor	1	AGDLLEDSPK	AGDLLEDS(UniMod:21)PK	2	AGDLLEDS(UniMod:21)PK2	4.33727e+07	4.57727e+07	4.92688e+07
P51858	P51858	HDGF_HUMAN	HDGF	Hepatoma-derived growth factor	1	AGDLLEDSPKR	AGDLLEDS(UniMod:21)PKR	2	AGDLLEDS(UniMod:21)PKR2	1.37953e+06	1.17778e+06
Q9Y320	Q9Y320	TMX2_HUMAN	TMX2	Thioredoxin-related transmembrane protein 2	1	AGDNIPEEQPVASTPTTVSDGENKK	AGDNIPEEQPVASTPTTVS(UniMod:21)DGENKK	3	AGDNIPEEQPVASTPTTVS(UniMod:21)DGENKK3	2.35778e+06	2.16114e+06	2.30264e+06
Q08J23	Q08J23	NSUN2_HUMAN	NSUN2	RNA cytosine C(5)-methyltransferase NSUN2	1	AGEPNSPDAEEANSPDVTAGCDPAGVHPPR	AGEPNS(UniMod:21)PDAEEANSPDVTAGC(UniMod:4)DPAGVHPPR	3	AGEPNS(UniMod:21)PDAEEANSPDVTAGC(UniMod:4)DPAGVHPPR3	2.61726e+07	2.52898e+07	2.56353e+07
Q93009	Q93009;H3BMF6	UBP7_HUMAN	USP7	Ubiquitin carboxyl-terminal hydrolase 7	1	AGEQQLSEPEDMEMEAGDTDDPPR	AGEQQLS(UniMod:21)EPEDMEMEAGDTDDPPR	3	AGEQQLS(UniMod:21)EPEDMEMEAGDTDDPPR3	5.53433e+06	6.33767e+06	6.78254e+06
Q2YD98	Q2YD98;A0A7I2V554;A0A7I2V3L2;A0A7I2V4K1	UVSSA_HUMAN	UVSSA	UV-stimulated scaffold protein A	1	AGGGAQPSQTATGDPSDEDEDSDLEEFVR	AGGGAQPSQTATGDPS(UniMod:21)DEDEDS(UniMod:21)DLEEFVR	3	AGGGAQPSQTATGDPS(UniMod:21)DEDEDS(UniMod:21)DLEEFVR3	1.14208e+06	1.61362e+06	1.33366e+06
Q9H6H4	Q9H6H4	REEP4_HUMAN	REEP4	Receptor expression-enhancing protein 4	1	AGGLQDSDTEDECWSDTEAVPR	AGGLQDS(UniMod:21)DT(UniMod:21)EDEC(UniMod:4)WS(UniMod:21)DTEAVPR	3	AGGLQDS(UniMod:21)DT(UniMod:21)EDEC(UniMod:4)WS(UniMod:21)DTEAVPR3	696368	785180	438898
Q03252	Q03252	LMNB2_HUMAN	LMNB2	Lamin-B2	1	AGGPATPLSPTR	AGGPAT(UniMod:21)PLS(UniMod:21)PTR	2	AGGPAT(UniMod:21)PLS(UniMod:21)PTR2	789103	972081	802994
Q92522	Q92522	H1X_HUMAN	H1-10	Histone H1.10	1	AGGSAALSPSK	AGGSAALS(UniMod:21)PSK	2	AGGSAALS(UniMod:21)PSK2	1.10848e+07	1.12858e+07	1.08699e+07
O60832	O60832	DKC1_HUMAN	DKC1	H/ACA ribonucleoprotein complex subunit DKC1	1	AGLESGAEPGDGDSDTTK	AGLES(UniMod:21)GAEPGDGDS(UniMod:21)DTTK	2	AGLES(UniMod:21)GAEPGDGDS(UniMod:21)DTTK2	2.53353e+06	3.41281e+06	3.53217e+06
O60832	O60832	DKC1_HUMAN	DKC1	H/ACA ribonucleoprotein complex subunit DKC1	1	AGLESGAEPGDGDSDTTK	AGLES(UniMod:21)GAEPGDGDSDTTK	2	AGLES(UniMod:21)GAEPGDGDSDTTK2	474743	610619	594791
O60832	O60832	DKC1_HUMAN	DKC1	H/ACA ribonucleoprotein complex subunit DKC1	1	AGLESGAEPGDGDSDTTK	AGLESGAEPGDGDS(UniMod:21)DTTK	2	AGLESGAEPGDGDS(UniMod:21)DTTK2	1.92166e+07	1.86927e+07	2.05395e+07
Q9H6F5	Q9H6F5;H0YG79	CCD86_HUMAN	CCDC86	Coiled-coil domain-containing protein 86	1	AGLGSPERPPK	AGLGS(UniMod:21)PERPPK	2	AGLGS(UniMod:21)PERPPK2	2.9728e+06	3.03628e+06	3.36705e+06
Q9UQ35	Q9UQ35	SRRM2_HUMAN	SRRM2	Serine/arginine repetitive matrix protein 2	1	AGMSSNQSISSPVLDAVPR	AGMSSNQSISS(UniMod:21)PVLDAVPR	3	AGMSSNQSISS(UniMod:21)PVLDAVPR3	295972	396354	477286
Q641Q2	Q9Y4E1;Q641Q2;A0A096LPC5;F8W7U3;E7ESD2;A0A087WYF6;J3KP36;A0A0A0MT65	WAC2A_HUMAN	WASHC2A	WASH complex subunit 2A	0	AGNSDSEEDDANGRVELILEPK	AGNS(UniMod:21)DS(UniMod:21)EEDDANGRVELILEPK	3	AGNS(UniMod:21)DS(UniMod:21)EEDDANGRVELILEPK3	1.20475e+06	1.10555e+06	872285
Q9H3Q1	Q9H3Q1	BORG4_HUMAN	CDC42EP4	Cdc42 effector protein 4	1	AGPDLPSLPSHALEDEGWAAAAPSPGSAR	AGPDLPSLPSHALEDEGWAAAAPS(UniMod:21)PGSAR	3	AGPDLPSLPSHALEDEGWAAAAPS(UniMod:21)PGSAR3	2.06322e+06	2.44619e+06	2.15684e+06
Q9NRY4	Q9NRY4	RHG35_HUMAN	ARHGAP35	Rho GTPase-activating protein 35	1	AGSPLCNSNLQDSEEDIEPSYSLFR	AGS(UniMod:21)PLC(UniMod:4)NSNLQDSEEDIEPSYSLFR	3	AGS(UniMod:21)PLC(UniMod:4)NSNLQDSEEDIEPSYSLFR3	1.49256e+06	1.56946e+06	1.46825e+06
Q969V6	Q969V6;B0QY83;A0A087WU73;A0A494BZX7;W0Z7M9;A0A499FIJ6;E7ER32;A0A087X287	MRTFA_HUMAN	MRTFA	Myocardin-related transcription factor A	1	AGSCCLSPGGR	AGSC(UniMod:4)C(UniMod:4)LS(UniMod:21)PGGR	2	AGSC(UniMod:4)C(UniMod:4)LS(UniMod:21)PGGR2	351093	281730	359225
Q9UGU0	Q9UGU0;A0A6Q8PH68	TCF20_HUMAN	TCF20	Transcription factor 20	1	AGSSPAQGAQNEPPR	AGSS(UniMod:21)PAQGAQNEPPR	2	AGSS(UniMod:21)PAQGAQNEPPR2	192758	255324	266435
Q6PJG2	Q6PJG2;A0A1C7CYX1	MDEAS_HUMAN	MIDEAS	Mitotic deacetylase-associated SANT domain protein	1	AGTFIAPPVYSNITPYQSHLRSPVR	AGTFIAPPVYSNITPYQSHLRS(UniMod:21)PVR	3	AGTFIAPPVYSNITPYQSHLRS(UniMod:21)PVR3	780153	684547
P07737	P07737	PROF1_HUMAN	PFN1	Profilin-1	1	AGWNAYIDNLMADGTCQDAAIVGYK	AGWNAY(UniMod:21)IDNLMADGTC(UniMod:4)QDAAIVGYK	3	AGWNAY(UniMod:21)IDNLMADGTC(UniMod:4)QDAAIVGYK3	114370	194613	221051
Q8WUA4	Q8WUA4;H0Y4Q6	TF3C2_HUMAN	GTF3C2	General transcription factor 3C polypeptide 2	1	AHFNAMFQPSSPTR	AHFNAMFQPSS(UniMod:21)PTR	2	AHFNAMFQPSS(UniMod:21)PTR2	694954	797306	518917
P36871	P36871;A0A3B3ITK7	PGM1_HUMAN	PGM1	Phosphoglucomutase-1	1	AIGGIILTASHNPGGPNGDFGIK	AIGGIILT(UniMod:21)ASHNPGGPNGDFGIK	3	AIGGIILT(UniMod:21)ASHNPGGPNGDFGIK3	3.52331e+06	3.84738e+06	3.97884e+06
Q9NYJ8	Q9NYJ8;A0A1B0GV57	TAB2_HUMAN	TAB2	TGF-beta-activated kinase 1 and MAP3K7-binding protein 2	1	AIGNNSATSPR	AIGNNSATS(UniMod:21)PR	2	AIGNNSATS(UniMod:21)PR2	395022	480085	366311
O00401	O00401	WASL_HUMAN	WASL	Neural Wiskott-Aldrich syndrome protein	1	AIHSSDEDEDEDDEEDFEDDDEWED	AIHS(UniMod:21)S(UniMod:21)DEDEDEDDEEDFEDDDEWED	3	AIHS(UniMod:21)S(UniMod:21)DEDEDEDDEEDFEDDDEWED3	2.03922e+06	2.06874e+06	1.30236e+06
Q14676	Q14676	MDC1_HUMAN	MDC1	Mediator of DNA damage checkpoint protein 1	1	AIPGDQHPESPVHTEPMGIQGR	AIPGDQHPES(UniMod:21)PVHTEPMGIQGR	3	AIPGDQHPES(UniMod:21)PVHTEPMGIQGR3	329918		476118
Q9NQG6	Q9NQG6;B0QY95	MID51_HUMAN	MIEF1	Mitochondrial dynamics protein MID51	1	AISAPTSPTR	AISAPTS(UniMod:21)PTR	2	AISAPTS(UniMod:21)PTR2	159987	152561	155579
Q8N1F8	Q8N1F8	S11IP_HUMAN	STK11IP	Serine/threonine-protein kinase 11-interacting protein	1	AKNSPPQAPSTR	AKNS(UniMod:21)PPQAPSTR	2	AKNS(UniMod:21)PPQAPSTR2	1.02089e+06	1.21126e+06	1.4112e+06
P53396	P53396	ACLY_HUMAN	ACLY	ATP-citrate synthase	1	AKPAMPQDSVPSPR	AKPAMPQDSVPS(UniMod:21)PR	3	AKPAMPQDSVPS(UniMod:21)PR3	324401	395873	274622
Q96MU7	Q96MU7;J3QR07	YTDC1_HUMAN	YTHDC1	YTH domain-containing protein 1	1	AKSPTPDGSER	AKS(UniMod:21)PT(UniMod:21)PDGSER	2	AKS(UniMod:21)PT(UniMod:21)PDGSER2	4.76787e+06	6.2071e+06	5.27028e+06
Q96MU7	Q96MU7;J3QR07	YTDC1_HUMAN	YTHDC1	YTH domain-containing protein 1	1	AKSPTPDGSER	AKS(UniMod:21)PT(UniMod:21)PDGSER	3	AKS(UniMod:21)PT(UniMod:21)PDGSER3	266373	144217	58543.2
Q96MU7	Q96MU7;J3QR07	YTDC1_HUMAN	YTHDC1	YTH domain-containing protein 1	1	AKSPTPDGSER	AKS(UniMod:21)PTPDGSER	2	AKS(UniMod:21)PTPDGSER2	245915	299797	282418
Q5VZL5	Q5VZL5;H7C1I7	ZMYM4_HUMAN	ZMYM4	Zinc finger MYM-type protein 4	1	AKSEDSDVELSD	AKSEDS(UniMod:21)DVELS(UniMod:21)D	2	AKSEDS(UniMod:21)DVELS(UniMod:21)D2	1.10683e+06	1.69907e+06	1.67276e+06
Q4KMP7	Q4KMP7	TB10B_HUMAN	TBC1D10B	TBC1 domain family member 10B	1	ALAAGADSPK	ALAAGADS(UniMod:21)PK	2	ALAAGADS(UniMod:21)PK2	253316	262940	304468
P14324	P14324;A0A087WVN4;A0A087X1D8	FPPS_HUMAN	FDPS	Farnesyl pyrophosphate synthase	1	ALCSSLRMNGDQNSDVYAQEK	ALC(UniMod:4)SS(UniMod:21)LRMNGDQNSDVYAQEK	3	ALC(UniMod:4)SS(UniMod:21)LRMNGDQNSDVYAQEK3	34009.2	28138	41460.7
Q8IY81	Q8IY81	SPB1_HUMAN	FTSJ3	pre-rRNA 2'-O-ribose RNA methyltransferase FTSJ3	1	ALDISLSSGEEDEGDEEDSTAGTTK	ALDISLS(UniMod:21)S(UniMod:21)GEEDEGDEEDSTAGTTK	3	ALDISLS(UniMod:21)S(UniMod:21)GEEDEGDEEDSTAGTTK3	8.26125e+06	1.01769e+07	9.14372e+06
Q32MZ4	Q32MZ4	LRRF1_HUMAN	LRRFIP1	Leucine-rich repeat flightless-interacting protein 1	1	ALDSNSLENDDLSAPGREPGHFNPESR	ALDS(UniMod:21)NSLENDDLSAPGREPGHFNPESR	3	ALDS(UniMod:21)NSLENDDLSAPGREPGHFNPESR3			258694
O43159	O43159;E9PPY3	RRP8_HUMAN	RRP8	Ribosomal RNA-processing protein 8	1	ALEAASLSQHPPSLCISDSEEEEEER	ALEAASLSQHPPSLC(UniMod:4)IS(UniMod:21)DS(UniMod:21)EEEEEER	3	ALEAASLSQHPPSLC(UniMod:4)IS(UniMod:21)DS(UniMod:21)EEEEEER3	2.39681e+06	2.25586e+06	2.46515e+06
Q8N3X1	Q8N3X1	FNBP4_HUMAN	FNBP4	Formin-binding protein 4	1	ALEEGDGSVSGSSPRSDISQPASQDGMR	ALEEGDGSVS(UniMod:21)GSSPRS(UniMod:21)DISQPASQDGMR	3	ALEEGDGSVS(UniMod:21)GSSPRS(UniMod:21)DISQPASQDGMR3	638146	633703	646926
Q8N3X1	Q8N3X1	FNBP4_HUMAN	FNBP4	Formin-binding protein 4	1	ALEEGDGSVSGSSPR	ALEEGDGSVSGSS(UniMod:21)PR	2	ALEEGDGSVSGSS(UniMod:21)PR2		178847	105675
Q9BXY0	Q9BXY0	MAK16_HUMAN	MAK16	Protein MAK16 homolog	1	ALEQQEAESDSSDTEEKDDDDDDEEDVGK	ALEQQEAESDS(UniMod:21)SDT(UniMod:21)EEKDDDDDDEEDVGK	3	ALEQQEAESDS(UniMod:21)SDT(UniMod:21)EEKDDDDDDEEDVGK3		709692	811903
Q13769	Q13769;H7C072	THOC5_HUMAN	THOC5	THO complex subunit 5 homolog	1	ALFKPPEDSQDDESDSDAEEEQTTK	ALFKPPEDSQDDES(UniMod:21)DS(UniMod:21)DAEEEQTTK	3	ALFKPPEDSQDDES(UniMod:21)DS(UniMod:21)DAEEEQTTK3	7.19134e+06	7.94151e+06	7.9933e+06
P11831	P11831	SRF_HUMAN	SRF	Serum response factor	1	ALIQTCLNSPDSPPRSDPTTDQR	ALIQTC(UniMod:4)LNSPDS(UniMod:21)PPRSDPTTDQR	3	ALIQTC(UniMod:4)LNSPDS(UniMod:21)PPRSDPTTDQR3	590179	783222	781841
O14545	O14545	TRAD1_HUMAN	TRAFD1	TRAF-type zinc finger domain-containing protein 1	1	ALPSLNTGSSSPR	ALPSLNTGSSS(UniMod:21)PR	2	ALPSLNTGSSS(UniMod:21)PR2			197455
Q8N3E9	Q8N3E9	PLCD3_HUMAN	PLCD3	1-phosphatidylinositol 4,5-bisphosphate phosphodiesterase delta-3	1	ALSDREEEEEDDEEEEEEVEAAAQR	ALS(UniMod:21)DREEEEEDDEEEEEEVEAAAQR	3	ALS(UniMod:21)DREEEEEDDEEEEEEVEAAAQR3	2.88817e+06	2.86899e+06	3.22358e+06
H0YG16;H0YJK1	H0YJK1;H0YG16	H0YG16_HUMAN;H0YJK1_HUMAN	KLC1	Kinesin light chain 1 (Fragment)	1	ALSASHTDLAH	ALSAS(UniMod:21)HTDLAH	2	ALSAS(UniMod:21)HTDLAH2	1.38928e+06	1.3833e+06	1.523e+06
P11717	P11717;A0A7I2V657	MPRI_HUMAN	IGF2R	Cation-independent mannose-6-phosphate receptor	1	ALSSLHGDDQDSEDEVLTIPEVK	ALSS(UniMod:21)LHGDDQDS(UniMod:21)EDEVLTIPEVK	3	ALSS(UniMod:21)LHGDDQDS(UniMod:21)EDEVLTIPEVK3	2.52021e+06	3.04695e+06	2.71143e+06
Q14432	Q14432	PDE3A_HUMAN	PDE3A	cGMP-inhibited 3',5'-cyclic phosphodiesterase A	1	ALTYTQSAPDLSPQILTPPVICSSCGR	ALT(UniMod:21)YTQSAPDLSPQILTPPVIC(UniMod:4)SSC(UniMod:4)GR	3	ALT(UniMod:21)YTQSAPDLSPQILTPPVIC(UniMod:4)SSC(UniMod:4)GR3	986809	565036	881220
P04920	P04920;C9J9M9;A0A7I2V5T6	B3A2_HUMAN	SLC4A2	Anion exchange protein 2	1	ALTQPSPVSTPSSVQFFLQEDDSADR	ALTQPS(UniMod:21)PVSTPSSVQFFLQEDDSADR	3	ALTQPS(UniMod:21)PVSTPSSVQFFLQEDDSADR3	263510	333632	332337
P04920	P04920;C9J9M9;A0A7I2V5T6	B3A2_HUMAN	SLC4A2	Anion exchange protein 2	1	ALTQPSPVSTPSSVQFFLQEDDSADRK	ALTQPS(UniMod:21)PVSTPSSVQFFLQEDDSADRK	3	ALTQPS(UniMod:21)PVSTPSSVQFFLQEDDSADRK3	1.34543e+06	1.46525e+06	1.56792e+06
Q03135	Q03135;E9PCT5	CAV1_HUMAN	CAV1	Caveolin-1	1	AMADELSEK	AMADELS(UniMod:21)EK	2	AMADELS(UniMod:21)EK2	1.03219e+06	1.41966e+06	1.45139e+06
Q86VR2	Q86VR2;K7EQI9	RETR3_HUMAN	RETREG3	Reticulophagy regulator 3	1	AMDNHSDSEEELAAFCPQLDDSTVAR	AMDNHS(UniMod:21)DS(UniMod:21)EEELAAFC(UniMod:4)PQLDDSTVAR	3	AMDNHS(UniMod:21)DS(UniMod:21)EEELAAFC(UniMod:4)PQLDDSTVAR3	4.82489e+06	5.20228e+06	4.97509e+06
Q9UJU6	Q9UJU6;H0Y5J4;B4DDD6	DBNL_HUMAN	DBNL	Drebrin-like protein	1	AMSTTSISSPQPGK	AMSTTSISS(UniMod:21)PQPGK	2	AMSTTSISS(UniMod:21)PQPGK2	164472	289419	205595
Q86UU0	Q86UU0;A0A087WZX0	BCL9L_HUMAN	BCL9L	B-cell CLL/lymphoma 9-like protein	1	ANQISPSNSSLK	ANQIS(UniMod:21)PSNSSLK	2	ANQIS(UniMod:21)PSNSSLK2	335186
Q9UFC0	Q9UFC0;F8WDB4	LRWD1_HUMAN	LRWD1	Leucine-rich repeat and WD repeat-containing protein 1	1	ANSPEKPPEAGAAHK	ANS(UniMod:21)PEKPPEAGAAHK	3	ANS(UniMod:21)PEKPPEAGAAHK3	381744	423254	567495
O15530;Q6A1A2	Q6A1A2;O15530;E9PER6	PDPK1_HUMAN;PDPK2_HUMAN	PDPK1;PDPK2P	3-phosphoinositide-dependent protein kinase 1	0	ANSFVGTAQYVSPELLTEK	ANSFVGT(UniMod:21)AQYVSPELLTEK	3	ANSFVGT(UniMod:21)AQYVSPELLTEK3	845530	676322	534140
Q92530	Q92530;H0Y555;Q5QPM7;Q5QPM9	PSMF1_HUMAN	PSMF1	Proteasome inhibitor PI31 subunit	1	ANVSSPHR	ANVSS(UniMod:21)PHR	2	ANVSS(UniMod:21)PHR2	314743	372045	275505
P54253	P54253	ATX1_HUMAN	ATXN1	Ataxin-1	1	APGLITPGSPPPAQQNQYVHISSSPQNTGR	APGLIT(UniMod:21)PGSPPPAQQNQYVHISSSPQNTGR	3	APGLIT(UniMod:21)PGSPPPAQQNQYVHISSSPQNTGR3		209615	178180
Q06265	Q06265;D6RIY6	EXOS9_HUMAN	EXOSC9	Exosome complex component RRP45	1	APIDTSDVEEK	APIDTS(UniMod:21)DVEEK	2	APIDTS(UniMod:21)DVEEK2	6.45501e+06	7.32398e+06	6.68129e+06
Q8NHM5	Q8NHM5;S4R3G4;F8WBN2	KDM2B_HUMAN	KDM2B	Lysine-specific demethylase 2B	1	APKPPTDGSTSPTSTPSEDQEALGK	APKPPTDGSTS(UniMod:21)PTSTPSEDQEALGK	3	APKPPTDGSTS(UniMod:21)PTSTPSEDQEALGK3
A0A1B0GW05	A0A1B0GW05	A0A1B0GW05_HUMAN	DPY19L1	Probable C-mannosyltransferase DPY19L1	1	APLSPGRK	APLS(UniMod:21)PGRK	2	APLS(UniMod:21)PGRK2	1.09644e+06	1.02017e+06	894815
Q66K14	Q66K14;G3V133	TBC9B_HUMAN	TBC1D9B	TBC1 domain family member 9B	1	APQESQVVVEGGSGEGQGSPSQLLSDDETK	APQESQVVVEGGSGEGQGSPS(UniMod:21)QLLSDDETK	3	APQESQVVVEGGSGEGQGSPS(UniMod:21)QLLSDDETK3	159716	203766	169787
A9Z1X7	Q8IYB3;M0R088;A9Z1X7	A9Z1X7_HUMAN	SRRM1	Serine/arginine repetitive matrix protein 1	1	APQTSSSPPPVR	APQTS(UniMod:21)SS(UniMod:21)PPPVR	2	APQTS(UniMod:21)SS(UniMod:21)PPPVR2	6.35446e+06	6.38489e+06	6.45745e+06
A9Z1X7	Q8IYB3;M0R088;A9Z1X7	A9Z1X7_HUMAN	SRRM1	Serine/arginine repetitive matrix protein 1	1	APQTSSSPPPVR	APQTSSS(UniMod:21)PPPVR	2	APQTSSS(UniMod:21)PPPVR2	1.33832e+07	1.45338e+07	1.56965e+07
O75970	O75970;F5H1U9;B7ZB24	MPDZ_HUMAN	MPDZ	Multiple PDZ domain protein	1	APSQSESEPEK	APS(UniMod:21)QSESEPEK	2	APS(UniMod:21)QSESEPEK2	368632	430242	336900
Q14980	Q14980;F5H6Y5;F5H0Z7;F5H4J1;F5H763	NUMA1_HUMAN	NUMA1	Nuclear mitotic apparatus protein 1	1	APVPSTCSSTFPEELSPPSHQAK	APVPSTC(UniMod:4)SSTFPEELS(UniMod:21)PPSHQAK	3	APVPSTC(UniMod:4)SSTFPEELS(UniMod:21)PPSHQAK3	2.82677e+06	3.85134e+06	3.52947e+06
Q13200	Q13200;F8WBS8;C9JPC0	PSMD2_HUMAN	PSMD2	26S proteasome non-ATPase regulatory subunit 2	1	APVQPQQSPAAAPGGTDEKPSGK	APVQPQQS(UniMod:21)PAAAPGGTDEKPSGK	3	APVQPQQS(UniMod:21)PAAAPGGTDEKPSGK3	5.84149e+06	6.02232e+06	6.26195e+06
Q9GZR7	Q9GZR7;G3V529	DDX24_HUMAN	DDX24	ATP-dependent RNA helicase DDX24	1	AQAVSEEEEEEEGK	AQAVS(UniMod:21)EEEEEEEGK	2	AQAVS(UniMod:21)EEEEEEEGK2	8.94109e+06	9.20421e+06	9.35491e+06
O94979	O94979;H0YAB3;D6RHZ5;D6REX3;H7BXG7	SC31A_HUMAN	SEC31A	Protein transport protein Sec31A	1	AQGEPVAGHESPK	AQGEPVAGHES(UniMod:21)PK	2	AQGEPVAGHES(UniMod:21)PK2	2.25077e+06	2.51155e+06	2.52747e+06
O94979	O94979;H0YAB3;D6RHZ5;D6REX3;H7BXG7	SC31A_HUMAN	SEC31A	Protein transport protein Sec31A	1	AQGEPVAGHESPKIPYEK	AQGEPVAGHES(UniMod:21)PKIPYEK	3	AQGEPVAGHES(UniMod:21)PKIPYEK3	1.16998e+06	1.58842e+06	1.65894e+06
O60343	O60343;A0A3B3IRT3;Q5JU47	TBCD4_HUMAN	TBC1D4	TBC1 domain family member 4	1	AQGVRSPLLR	AQGVRS(UniMod:21)PLLR	2	AQGVRS(UniMod:21)PLLR2	1.16832e+06	1.0378e+06
Q15149	Q15149;A0A8I5KYZ1;A0A8I5KSD5;E9PMV1;A0A8I5KUE3;H0YDN1	PLEC_HUMAN	PLEC	Plectin	1	AQLEPVASPAK	AQLEPVAS(UniMod:21)PAK	2	AQLEPVAS(UniMod:21)PAK2	1.42451e+06	1.6787e+06	1.87053e+06
O75376	O75376;E7EVK1	NCOR1_HUMAN	NCOR1	Nuclear receptor corepressor 1	1	AQLSPGIYDDTSAR	AQLS(UniMod:21)PGIYDDTSAR	2	AQLS(UniMod:21)PGIYDDTSAR2	72310.1	40657.7	146190
Q14676	Q14676	MDC1_HUMAN	MDC1	Mediator of DNA damage checkpoint protein 1	1	AQPFGFIDSDTDAEEERIPATPVVIPMK	AQPFGFIDS(UniMod:21)DTDAEEERIPATPVVIPMK	3	AQPFGFIDS(UniMod:21)DTDAEEERIPATPVVIPMK3	1.22642e+06	1.19518e+06	1.45474e+06
O15027	O15027;A0A3F2YNZ0;F1T0I1;A0A3F2YNX0;A0A8I5KPG1	SC16A_HUMAN	SEC16A	Protein transport protein Sec16A	1	AQQELVPPQQQASPPQLPK	AQQELVPPQQQAS(UniMod:21)PPQLPK	3	AQQELVPPQQQAS(UniMod:21)PPQLPK3	434496	345221	315710
Q9UQ35	Q9UQ35;I3L4D8	SRRM2_HUMAN	SRRM2	Serine/arginine repetitive matrix protein 2	1	AQTPPGPSLSGSK	AQT(UniMod:21)PPGPSLSGSK	2	AQT(UniMod:21)PPGPSLSGSK2	1.14844e+07	1.32285e+07	1.37738e+07
Q01082	Q01082;A0A087WUZ3	SPTB2_HUMAN	SPTBN1	Spectrin beta chain, non-erythrocytic 1	1	AQTLPTSVVTITSESSPGKR	AQTLPTSVVTITSESS(UniMod:21)PGKR	3	AQTLPTSVVTITSESS(UniMod:21)PGKR3	2.66251e+06	3.03867e+06	2.5797e+06
Q13247	Q13247	SRSF6_HUMAN	SRSF6	Serine/arginine-rich splicing factor 6	1	ARSVSPPPK	ARS(UniMod:21)VS(UniMod:21)PPPK	2	ARS(UniMod:21)VS(UniMod:21)PPPK2	2.10922e+08	2.21298e+08	2.06742e+08
Q15149	Q15149;A0A8I5KYZ1;A0A8I5KSD5;E9PMV1;A0A8I5KUE3;H0YDN1	PLEC_HUMAN	PLEC	Plectin	1	ARSDEGQLSPATR	ARSDEGQLS(UniMod:21)PATR	2	ARSDEGQLS(UniMod:21)PATR2	1.61294e+06	1.7145e+06	1.60211e+06
Q9NQ55	Q9NQ55;A0A0A6YYI3;A0A0B4J1V8;H7C446;A8MV53	SSF1_HUMAN	PPAN	Suppressor of SWI4 1 homolog	0	ARVGGSDEEASGIPSR	ARVGGS(UniMod:21)DEEASGIPSR	2	ARVGGS(UniMod:21)DEEASGIPSR2	1.34246e+06	1.45151e+06	859910
Q9C0E8	Q9C0E8	LNP_HUMAN	LNPK	Endoplasmic reticulum junction formation protein lunapark	1	ASDSEEPEEK	AS(UniMod:21)DSEEPEEK	2	AS(UniMod:21)DSEEPEEK2	980816	1.08095e+06	1.05327e+06
Q5JSH3	Q5JSH3	WDR44_HUMAN	WDR44	WD repeat-containing protein 44	1	ASESDTEEFYDAPEDVHLGGGYPVGSPGK	AS(UniMod:21)ESDT(UniMod:21)EEFYDAPEDVHLGGGYPVGSPGK	3	AS(UniMod:21)ESDT(UniMod:21)EEFYDAPEDVHLGGGYPVGSPGK3	437418	430982	425510
P60981	P60981;F6RFD5	DEST_HUMAN	DSTN	Destrin	1	ASGVQVADEVCR	AS(UniMod:21)GVQVADEVC(UniMod:4)R	2	AS(UniMod:21)GVQVADEVC(UniMod:4)R2	689888	756838	823930
O15027	O15027;A0A3F2YNZ0;F1T0I1;A0A3F2YNX0;A0A8I5KPG1	SC16A_HUMAN	SEC16A	Protein transport protein Sec16A	1	ASHSSERPPPR	AS(UniMod:21)HSSERPPPR	3	AS(UniMod:21)HSSERPPPR3	233524	317782
O94826	O94826	TOM70_HUMAN	TOMM70	Mitochondrial import receptor subunit TOM70	1	ASPAPGSGHPEGPGAHLDMNSLDR	AS(UniMod:21)PAPGSGHPEGPGAHLDMNSLDR	3	AS(UniMod:21)PAPGSGHPEGPGAHLDMNSLDR3	6.18062e+06	7.48105e+06	9.45039e+06
Q8IU81	Q8IU81	I2BP1_HUMAN	IRF2BP1	Interferon regulatory factor 2-binding protein 1	1	ASPEPEGEAAGK	AS(UniMod:21)PEPEGEAAGK	2	AS(UniMod:21)PEPEGEAAGK2	664548	691452	688605
Q9H1B7	Q9H1B7	I2BPL_HUMAN	IRF2BPL	Probable E3 ubiquitin-protein ligase IRF2BPL	1	ASPEPPDSAEGALK	AS(UniMod:21)PEPPDSAEGALK	2	AS(UniMod:21)PEPPDSAEGALK2	208153	291117	174985
Q9C0C2	Q9C0C2	TB182_HUMAN	TNKS1BP1	182 kDa tankyrase-1-binding protein	1	ASPEPPGPESSSR	AS(UniMod:21)PEPPGPESSSR	2	AS(UniMod:21)PEPPGPESSSR2	351990	376384	408548
P46379	P46379;A0A7I2V508;A0A024RCR6;A0A0G2JL47;A0A7P0MQS5;H0Y710;A0A0G2JK23	BAG6_HUMAN	BAG6	Large proline-rich protein BAG6	1	ASPEPQRENASPAPGTTAEEAMSR	AS(UniMod:21)PEPQRENAS(UniMod:21)PAPGTTAEEAMSR	3	AS(UniMod:21)PEPQRENAS(UniMod:21)PAPGTTAEEAMSR3	843003	1.25147e+06	895115
O00273	O00273	DFFA_HUMAN	DFFA	DNA fragmentation factor subunit alpha	1	ASPPGDLQNPK	AS(UniMod:21)PPGDLQNPK	2	AS(UniMod:21)PPGDLQNPK2	5.55865e+06	6.15606e+06	6.05259e+06
Q86YS7	Q86YS7;H0YFC4	C2CD5_HUMAN	C2CD5	C2 domain-containing protein 5	1	ASPVGDGNFR	AS(UniMod:21)PVGDGNFR	2	AS(UniMod:21)PVGDGNFR2	265341	249253	292202
Q641Q2	Q9Y4E1;Q641Q2;A0A096LPC5;F8W7U3;E7ESD2;A0A087WYF6	WAC2A_HUMAN	WASHC2A	WASH complex subunit 2A	0	ASALLFSSDEEDQWNIPASQTHLASDSR	ASALLFSS(UniMod:21)DEEDQWNIPASQTHLASDSR	3	ASALLFSS(UniMod:21)DEEDQWNIPASQTHLASDSR3	1.51622e+06	1.75197e+06	1.72306e+06
Q63ZY6	Q63ZY6	NSN5C_HUMAN	NSUN5P2	Putative methyltransferase NSUN5C	1	ASAPERTPSPAPK	ASAPERT(UniMod:21)PS(UniMod:21)PAPK	2	ASAPERT(UniMod:21)PS(UniMod:21)PAPK2	1.10337e+06	1.09859e+06	1.09259e+06
P02545	P02545;A0A6Q8PFJ0	LMNA_HUMAN	LMNA	Prelamin-A/C	1	ASASGSGAQVGGPISSGSSASSVTVTR	ASASGSGAQVGGPISSGSS(UniMod:21)ASSVTVTR	3	ASASGSGAQVGGPISSGSS(UniMod:21)ASSVTVTR3	260225	381001	612037
Q9Y2W1	Q9Y2W1;A0A3B3ITZ9	TR150_HUMAN	THRAP3	Thyroid hormone receptor-associated protein 3	1	ASAVSELSPR	ASAVSELS(UniMod:21)PR	2	ASAVSELS(UniMod:21)PR2	1.75209e+07	1.91603e+07	1.96856e+07
Q7L7X3	Q7L7X3	TAOK1_HUMAN	TAOK1	Serine/threonine-protein kinase TAO1	1	ASDPQSPPQVSR	ASDPQS(UniMod:21)PPQVSR	2	ASDPQS(UniMod:21)PPQVSR2	1.4405e+06	1.36333e+06	1.36224e+06
Q9BZZ5	Q9BZZ5;G3V1C3;H0YER7	API5_HUMAN	API5	Apoptosis inhibitor 5	1	ASEDTTSGSPPKK	ASEDTTSGS(UniMod:21)PPKK	2	ASEDTTSGS(UniMod:21)PPKK2	636637	766789	748674
Q9NRA8	Q9NRA8;B1AKL4	4ET_HUMAN	EIF4ENIF1	Eukaryotic translation initiation factor 4E transporter	1	ASEENLLSSSSVPSADRDSSPTTNSK	ASEENLLSSSSVPS(UniMod:21)ADRDSSPTTNSK	3	ASEENLLSSSSVPS(UniMod:21)ADRDSSPTTNSK3	513852	344586	597115
Q8NDT2	Q8NDT2	RB15B_HUMAN	RBM15B	Putative RNA-binding protein 15B	1	ASGDPGASGMSPR	ASGDPGASGMS(UniMod:21)PR	2	ASGDPGASGMS(UniMod:21)PR2	803608	902674	917315
Q6NXT1	Q6NXT1;D3YTC9;C9JU48;H7BZV9	ANR54_HUMAN	ANKRD54	Ankyrin repeat domain-containing protein 54	1	ASGGAQSPLR	ASGGAQS(UniMod:21)PLR	2	ASGGAQS(UniMod:21)PLR2	638758	657211	479173
Q02880	Q02880	TOP2B_HUMAN	TOP2B	DNA topoisomerase 2-beta	1	ASGSENEGDYNPGR	ASGS(UniMod:21)ENEGDYNPGR	2	ASGS(UniMod:21)ENEGDYNPGR2	125879	135696	134522
Q09666	Q09666	AHNK_HUMAN	AHNAK	Neuroblast differentiation-associated protein AHNAK	1	ASLGSLEGEAEAEASSPK	ASLGSLEGEAEAEASS(UniMod:21)PK	3	ASLGSLEGEAEAEASS(UniMod:21)PK3	248411	391869	370227
Q9UKV3	Q9UKV3;E7EQT4;S4R3H4	ACINU_HUMAN	ACIN1	Apoptotic chromatin condensation inducer in the nucleus	1	ASLVALPEQTASEEETPPPLLTK	ASLVALPEQT(UniMod:21)ASEEETPPPLLTK	3	ASLVALPEQT(UniMod:21)ASEEETPPPLLTK3	563042	464560	372253
P46379	P46379;A0A7I2V508;A0A024RCR6;A0A0G2JL47;A0A7P0MQS5;H0Y710;A0A0G2JK23	BAG6_HUMAN	BAG6	Large proline-rich protein BAG6	1	ASPEPQRENASPAPGTTAEEAMSR	ASPEPQRENAS(UniMod:21)PAPGTTAEEAMSR	3	ASPEPQRENAS(UniMod:21)PAPGTTAEEAMSR3	1.36694e+06	1.35663e+06	1.50153e+06
Q8TEM1	Q8TEM1	PO210_HUMAN	NUP210	Nuclear pore membrane glycoprotein 210	1	ASPGHSPHYFAASSPTSPNALPPAR	ASPGHS(UniMod:21)PHYFAASSPTSPNALPPAR	3	ASPGHS(UniMod:21)PHYFAASSPTSPNALPPAR3	51283.9	124624
Q02880	Q02880	TOP2B_HUMAN	TOP2B	DNA topoisomerase 2-beta	1	ASPITNDGEDEFVPSDGLDKDEYTFSPGK	ASPIT(UniMod:21)NDGEDEFVPSDGLDKDEYTFSPGK	3	ASPIT(UniMod:21)NDGEDEFVPSDGLDKDEYTFSPGK3	1.22977e+06	1.25943e+06
P02545	P02545;A0A6Q8PHQ9;Q3BDU5;A0A804HL68;Q5TCI8;A0A6Q8PFJ0	LMNA_HUMAN	LMNA	Prelamin-A/C	1	ASSHSSQTQGGGSVTKK	ASS(UniMod:21)HSS(UniMod:21)QTQGGGSVTKK	3	ASS(UniMod:21)HSS(UniMod:21)QTQGGGSVTKK3	3.58886e+06	3.41525e+06	2.53848e+06
P02545	P02545;A0A6Q8PHQ9;Q3BDU5;A0A804HL68;Q5TCI8;A0A6Q8PFJ0	LMNA_HUMAN	LMNA	Prelamin-A/C	1	ASSHSSQTQGGGSVTKK	ASS(UniMod:21)HSSQTQGGGSVTKK	3	ASS(UniMod:21)HSSQTQGGGSVTKK3	2.35841e+06	2.42933e+06	2.8628e+06
Q16513	Q16513	PKN2_HUMAN	PKN2	Serine/threonine-protein kinase N2	1	ASSLGEIDESSELR	ASS(UniMod:21)LGEIDESSELR	2	ASS(UniMod:21)LGEIDESSELR2	2.76382e+06	3.23193e+06	3.26228e+06
Q14978	Q14978;A0A0A0MRM9	NOLC1_HUMAN	NOLC1	Nucleolar and coiled-body phosphoprotein 1	1	ASSPFRR	ASS(UniMod:21)PFRR	2	ASS(UniMod:21)PFRR2	1.41438e+07	1.43372e+07	1.57076e+07
Q9NWB6	Q9NWB6	ARGL1_HUMAN	ARGLU1	Arginine and glutamate-rich protein 1	1	ASSPPDR	ASS(UniMod:21)PPDR	2	ASS(UniMod:21)PPDR2	139247	171860
Q9NWB6	Q9NWB6	ARGL1_HUMAN	ARGLU1	Arginine and glutamate-rich protein 1	1	ASSPPDRIDIFGR	ASS(UniMod:21)PPDRIDIFGR	2	ASS(UniMod:21)PPDRIDIFGR2	5.39088e+06	6.74992e+06	6.57198e+06
Q9NSU2	Q9NSU2;C9J052	TREX1_HUMAN	TREX1	Three-prime repair exonuclease 1	1	ASSPSEHGPR	ASS(UniMod:21)PSEHGPR	2	ASS(UniMod:21)PSEHGPR2	931580	883148	1.08642e+06
Q9UHB6	Q9UHB6;F8VS07;F8VRN8;F8VQE1	LIMA1_HUMAN	LIMA1	LIM domain and actin-binding protein 1	1	ASSLSESSPPK	ASSLSESS(UniMod:21)PPK	2	ASSLSESS(UniMod:21)PPK2	2.6205e+06	2.93546e+06	3.0658e+06
Q13428	Q13428;H0Y8Y7;E7ETY2	TCOF_HUMAN	TCOF1	Treacle protein	1	ASSVSTKESPAR	ASSVSTKES(UniMod:21)PAR	2	ASSVSTKES(UniMod:21)PAR2	313283	444409	324334
O76021	O76021;J3QSV6	RL1D1_HUMAN	RSL1D1	Ribosomal L1 domain-containing protein 1	1	ATNESEDEIPQLVPIGKK	AT(UniMod:21)NESEDEIPQLVPIGKK	3	AT(UniMod:21)NESEDEIPQLVPIGKK3	842153	957988	842440
Q8IWW6	Q8IWW6;Q1RLN5	RHG12_HUMAN	ARHGAP12	Rho GTPase-activating protein 12	1	ATTPPNQGRPDSPVYANLQELK	AT(UniMod:21)TPPNQGRPDS(UniMod:21)PVYANLQELK	3	AT(UniMod:21)TPPNQGRPDS(UniMod:21)PVYANLQELK3	1.15528e+06	887311	796336
P29692	P29692;E9PI39;E9PRY8;E9PPR1;E9PK01;E9PL12;E9PQZ1;A0A087X1X7;E9PK06;E9PQ49;E9PL71	EF1D_HUMAN	EEF1D	Elongation factor 1-delta	1	ATAPQTQHVSPMR	ATAPQTQHVS(UniMod:21)PMR	2	ATAPQTQHVS(UniMod:21)PMR2	5.34995e+07	5.78641e+07	6.10027e+07
P29692	P29692;E9PI39;E9PRY8;E9PPR1;E9PK01;E9PL12;E9PQZ1;A0A087X1X7;E9PK06;E9PQ49;E9PL71	EF1D_HUMAN	EEF1D	Elongation factor 1-delta	1	ATAPQTQHVSPMR	ATAPQTQHVS(UniMod:21)PMR	3	ATAPQTQHVS(UniMod:21)PMR3	1.1446e+07	1.0805e+07	1.37444e+07
P29692	P29692;E9PI39;E9PRY8;E9PPR1;E9PK01;E9PL12;E9PQZ1;A0A087X1X7;E9PK06;E9PQ49;E9PL71	EF1D_HUMAN	EEF1D	Elongation factor 1-delta	1	ATAPQTQHVSPMRQVEPPAK	ATAPQTQHVS(UniMod:21)PMRQVEPPAK	3	ATAPQTQHVS(UniMod:21)PMRQVEPPAK3	3.39171e+06	3.74673e+06	3.87793e+06
Q9BXW9	Q9BXW9;A0A6Q8PFY3	FACD2_HUMAN	FANCD2	Fanconi anemia group D2 protein	1	ATEDGEEDEVSAGEK	ATEDGEEDEVS(UniMod:21)AGEK	2	ATEDGEEDEVS(UniMod:21)AGEK2	4.07814e+06	4.6284e+06	3.94715e+06
Q9UHF7	Q9UHF7;H0YC29;E5RFF3;E5RJ97	TRPS1_HUMAN	TRPS1	Zinc finger transcription factor Trps1	1	ATEETGQAQSGQANCQGLSPVSVASK	ATEETGQAQSGQANC(UniMod:4)QGLS(UniMod:21)PVSVASK	3	ATEETGQAQSGQANC(UniMod:4)QGLS(UniMod:21)PVSVASK3	216362	369303	254723
Q9UNF1	Q9UNF1;Q5H909	MAGD2_HUMAN	MAGED2	Melanoma-associated antigen D2	1	ATEVSKTPEAR	ATEVSKT(UniMod:21)PEAR	2	ATEVSKT(UniMod:21)PEAR2		43655.9
Q9UKJ3	Q9UKJ3	GPTC8_HUMAN	GPATCH8	G patch domain-containing protein 8	1	ATGPPSQNSNIGTGRGSEGDCSPEDK	ATGPPSQNSNIGT(UniMod:21)GRGS(UniMod:21)EGDC(UniMod:4)SPEDK	3	ATGPPSQNSNIGT(UniMod:21)GRGS(UniMod:21)EGDC(UniMod:4)SPEDK3		1.02744e+06	934453
O60927	O60927;Q5SRK2	PP1RB_HUMAN	PPP1R11	E3 ubiquitin-protein ligase PPP1R11	1	ATLGPTPTTPPQPPDPSQPPPGPMQH	ATLGPTPTT(UniMod:21)PPQPPDPSQPPPGPMQH	3	ATLGPTPTT(UniMod:21)PPQPPDPSQPPPGPMQH3	123039	299896	159832
Q8WWI1	Q8WWI1;H0YDG6;E9PMS6;E9PMT2;F8WD26;A0A0A0MTE2;J3KP06;E9PMP7;H0Y424	LMO7_HUMAN	LMO7	LIM domain only protein 7	1	ATLSSTSGLDLMSESGEGEISPQR	ATLSSTSGLDLMSESGEGEIS(UniMod:21)PQR	3	ATLSSTSGLDLMSESGEGEIS(UniMod:21)PQR3	1.02184e+06	1.41856e+06	1.05292e+06
Q8WWI1	Q8WWI1;H0YDG6;E9PMS6;E9PMT2;F8WD26;A0A0A0MTE2;J3KP06;E9PMP7;H0Y424	LMO7_HUMAN	LMO7	LIM domain only protein 7	1	ATLSSTSGLDLMSESGEGEISPQREVSR	ATLSSTSGLDLMSESGEGEIS(UniMod:21)PQREVSR	3	ATLSSTSGLDLMSESGEGEIS(UniMod:21)PQREVSR3	2.63706e+06	1.51384e+06	2.13941e+06
O76021	O76021;J3QSV6	RL1D1_HUMAN	RSL1D1	Ribosomal L1 domain-containing protein 1	1	ATNESEDEIPQLVPIGK	ATNES(UniMod:21)EDEIPQLVPIGK	3	ATNES(UniMod:21)EDEIPQLVPIGK3	985627	1.07065e+06	667480
Q86U86	Q86U86;E7EVG2;C9J053;C9JQF1;C9JCJ2;C9J409;C9JPI5	PB1_HUMAN	PBRM1	Protein polybromo-1	1	ATSPSSSVSGDFDDGHHSVSTPGPSR	ATS(UniMod:21)PSSSVSGDFDDGHHSVSTPGPSR	3	ATS(UniMod:21)PSSSVSGDFDDGHHSVSTPGPSR3	1.87747e+06	1.83987e+06	1.96375e+06
Q03252	Q03252	LMNB2_HUMAN	LMNB2	Lamin-B2	1	ATSSSSGSLSATGR	ATS(UniMod:21)SSSGSLSATGR	2	ATS(UniMod:21)SSSGSLSATGR2	502385	518146	439363
P24844	P19105;P24844;O14950;J3KTJ1;J3QRS3	MYL9_HUMAN	MYL9	Myosin regulatory light polypeptide 9	0	ATSNVFAMFDQSQIQEFK	ATSNVFAMFDQS(UniMod:21)QIQEFK	3	ATSNVFAMFDQS(UniMod:21)QIQEFK3	381530	1.28915e+06	90699.7
P30622	P30622;F5H1T5;F5H6A0;J3KP58	CLIP1_HUMAN	CLIP1	CAP-Gly domain-containing linker protein 1	1	ATSPLCTSTASMVSSSPSTPSNIPQK	ATSPLC(UniMod:4)TSTAS(UniMod:21)MVSSSPSTPSNIPQK	3	ATSPLC(UniMod:4)TSTAS(UniMod:21)MVSSSPSTPSNIPQK3	820090	729037	1.0241e+06
Q86U86	Q86U86;E7EVG2;C9J053;C9JQF1;C9JCJ2;C9J409;C9JPI5	PB1_HUMAN	PBRM1	Protein polybromo-1	1	ATSPSSSVSGDFDDGHHSVSTPGPSR	ATSPS(UniMod:21)SS(UniMod:21)VSGDFDDGHHSVSTPGPSR	3	ATSPS(UniMod:21)SS(UniMod:21)VSGDFDDGHHSVSTPGPSR3	1.13412e+06	1.04129e+06	1.11065e+06
Q8NC44	Q8NC44;H7C3D5;C9JIF3	RETR2_HUMAN	RETREG2	Reticulophagy regulator 2	1	ATTPQLTDVSEDLDQQSLPSEPEETLSR	ATTPQLT(UniMod:21)DVSEDLDQQSLPSEPEETLSR	3	ATTPQLT(UniMod:21)DVSEDLDQQSLPSEPEETLSR3	199887	82505.7	99531.3
Q9H1E3	Q9H1E3	NUCKS_HUMAN	NUCKS1	Nuclear ubiquitous casein and cyclin-dependent kinase substrate 1	1	ATVTPSPVK	ATVT(UniMod:21)PS(UniMod:21)PVK	2	ATVT(UniMod:21)PS(UniMod:21)PVK2	1.45465e+07	1.78527e+07	1.74612e+07
Q9H1E3	Q9H1E3	NUCKS_HUMAN	NUCKS1	Nuclear ubiquitous casein and cyclin-dependent kinase substrate 1	1	ATVTPSPVK	ATVTPS(UniMod:21)PVK	2	ATVTPS(UniMod:21)PVK2	1.74019e+07	1.95735e+07	2.01134e+07
Q86Z02;Q9H2X6	Q9H2X6;Q86Z02;H7BXX9;Q5SQL3;J3KP92	HIPK1_HUMAN;HIPK2_HUMAN	HIPK1;HIPK2	Homeodomain-interacting protein kinase 1	0	AVCSTYLQSR	AVC(UniMod:4)STY(UniMod:21)LQSR	2	AVC(UniMod:4)STY(UniMod:21)LQSR2	49869.8	107597	107913
Q9UHB7	Q9UHB7	AFF4_HUMAN	AFF4	AF4/FMR2 family member 4	1	AVGMPSPVSPK	AVGMPS(UniMod:21)PVSPK	2	AVGMPS(UniMod:21)PVSPK2	256084	293730	251406
Q5SYE7	Q5SYE7	NHSL1_HUMAN	NHSL1	NHS-like protein 1	1	AVPSPTTGEEGSVHSR	AVPS(UniMod:21)PTTGEEGSVHSR	3	AVPS(UniMod:21)PTTGEEGSVHSR3		122283	164137
Q9P275	Q9P275	UBP36_HUMAN	USP36	Ubiquitin carboxyl-terminal hydrolase 36	1	AVSPAPQSSSR	AVS(UniMod:21)PAPQSSSR	2	AVS(UniMod:21)PAPQSSSR2	1.03763e+06	1.11939e+06	1.04178e+06
E9PMV1	E9PMV1;H0YDN1	E9PMV1_HUMAN	PLEC	Plectin	1	AVSEDVSNGSSGSPSPGDTLPWNLGK	AVSEDVSNGS(UniMod:21)SGSPSPGDTLPWNLGK	3	AVSEDVSNGS(UniMod:21)SGSPSPGDTLPWNLGK3	125861
Q8NEF9	Q8NEF9	SRFB1_HUMAN	SRFBP1	Serum response factor-binding protein 1	1	AVTIANSPSK	AVTIANS(UniMod:21)PSK	2	AVTIANS(UniMod:21)PSK2	327330	305310	266328
P51610	P51610;H7C1C4	HCFC1_HUMAN	HCFC1	Host cell factor 1	1	AVTTVTQSTPVPGPSVPPPEELQVSPGPR	AVTTVTQSTPVPGPSVPPPEELQVS(UniMod:21)PGPR	3	AVTTVTQSTPVPGPSVPPPEELQVS(UniMod:21)PGPR3	1.8074e+06	2.13244e+06	1.88076e+06
P51812;Q15418;Q9UK32	P51812;Q9UK32;Q15418;B1AXG1;E9PGT3;B4DG22;B7ZB17	KS6A1_HUMAN;KS6A3_HUMAN;KS6A6_HUMAN	RPS6KA1;RPS6KA3;RPS6KA6	Ribosomal protein S6 kinase alpha-3	0	AYSFCGTVEYMAPEVVNR	AYS(UniMod:21)FC(UniMod:4)GTVEYMAPEVVNR	3	AYS(UniMod:21)FC(UniMod:4)GTVEYMAPEVVNR3	1.08113e+06	1.18258e+06	1.17303e+06
Q9BYW2	Q9BYW2;H7BZ93;C9JG86;A0A8I5KV15;H7C3H4;A0A1W2PPX9;H7BXT4	SETD2_HUMAN	SETD2	Histone-lysine N-methyltransferase SETD2	1	CCSPPNELGFR	C(UniMod:4)C(UniMod:4)S(UniMod:21)PPNELGFR	2	C(UniMod:4)C(UniMod:4)S(UniMod:21)PPNELGFR2	207849	290556	364913
P02765	P02765	FETUA_HUMAN	AHSG	Alpha-2-HS-glycoprotein	1	CDSSPDSAEDVRK	C(UniMod:4)DSSPDS(UniMod:21)AEDVRK	2	C(UniMod:4)DSSPDS(UniMod:21)AEDVRK2	2.27908e+06	2.48889e+06	2.66217e+06
Q147X3	Q147X3	NAA30_HUMAN	NAA30	N-alpha-acetyltransferase 30	1	CPFPAGAALACCSEDEEDDEEHEGGGSR	C(UniMod:4)PFPAGAALAC(UniMod:4)C(UniMod:4)S(UniMod:21)EDEEDDEEHEGGGSR	3	C(UniMod:4)PFPAGAALAC(UniMod:4)C(UniMod:4)S(UniMod:21)EDEEDDEEHEGGGSR3	526464	611561	621898
Q6ZMT1	Q6ZMT1	STAC2_HUMAN	STAC2	SH3 and cysteine-rich domain-containing protein 2	1	CPTEVLLTPPTPLPPPSPPPTASDR	C(UniMod:4)PTEVLLTPPTPLPPPS(UniMod:21)PPPTASDR	3	C(UniMod:4)PTEVLLTPPTPLPPPS(UniMod:21)PPPTASDR3	816281	1.09917e+06	920871
Q9BPX3	Q9BPX3	CND3_HUMAN	NCAPG	Condensin complex subunit 3	1	CQTAEADSESDHEVPEPESEMK	C(UniMod:4)QTAEADS(UniMod:21)ES(UniMod:21)DHEVPEPESEMK	3	C(UniMod:4)QTAEADS(UniMod:21)ES(UniMod:21)DHEVPEPESEMK3	340549	401946	380580
Q5JSZ5	Q5JSZ5	PRC2B_HUMAN	PRRC2B	Protein PRRC2B	1	CSPLEPDFVPDEK	C(UniMod:4)S(UniMod:21)PLEPDFVPDEK	2	C(UniMod:4)S(UniMod:21)PLEPDFVPDEK2	90007.8	112080	127432
P46013	P46013	KI67_HUMAN	MKI67	Proliferation marker protein Ki-67	1	CSASPPLRR	C(UniMod:4)SAS(UniMod:21)PPLRR	2	C(UniMod:4)SAS(UniMod:21)PPLRR2	395258	415358	415655
Q9Y478	Q9Y478;F5H610;F5H2X8	AAKB1_HUMAN	PRKAB1	5'-AMP-activated protein kinase subunit beta-1	1	CSDVSELSSSPPGPYHQEPYVCKPEER	C(UniMod:4)SDVSELSSS(UniMod:21)PPGPYHQEPYVC(UniMod:4)KPEER	3	C(UniMod:4)SDVSELSSS(UniMod:21)PPGPYHQEPYVC(UniMod:4)KPEER3	1.89757e+06	1.53763e+06	1.54039e+06
P21333	P21333;Q60FE5	FLNA_HUMAN	FLNA	Filamin-A	1	CSGPGLSPGMVR	C(UniMod:4)SGPGLS(UniMod:21)PGMVR	2	C(UniMod:4)SGPGLS(UniMod:21)PGMVR2	2.18066e+07	2.46831e+07	2.3391e+07
Q9P0K8	Q9P0K8	FOXJ2_HUMAN	FOXJ2	Forkhead box protein J2	1	CSPGSPTDPNATLSK	C(UniMod:4)SPGS(UniMod:21)PTDPNATLSK	2	C(UniMod:4)SPGS(UniMod:21)PTDPNATLSK2	219619	370610	337691
Q9P258	Q9P258	RCC2_HUMAN	RCC2	Protein RCC2	1	CSSSSGGGSSGDEDGLELDGAPGGGKR	C(UniMod:4)SSS(UniMod:21)S(UniMod:21)GGGSSGDEDGLELDGAPGGGKR	3	C(UniMod:4)SSS(UniMod:21)S(UniMod:21)GGGSSGDEDGLELDGAPGGGKR3	556661	503714	549338
P47712	P47712	PA24A_HUMAN	PLA2G4A	Cytosolic phospholipase A2	1	CSVSLSNVEAR	C(UniMod:4)SVS(UniMod:21)LSNVEAR	2	C(UniMod:4)SVS(UniMod:21)LSNVEAR2	1.1058e+07	1.23749e+07	1.14893e+07
Q32MZ4	Q32MZ4	LRRF1_HUMAN	LRRFIP1	Leucine-rich repeat flightless-interacting protein 1	1	CTLPEHESPSQDISDACEAESTER	C(UniMod:4)TLPEHES(UniMod:21)PSQDISDAC(UniMod:4)EAESTER	3	C(UniMod:4)TLPEHES(UniMod:21)PSQDISDAC(UniMod:4)EAESTER3	1.07049e+06	1.14638e+06	1.202e+06
O60343	O60343	TBCD4_HUMAN	TBC1D4	TBC1 domain family member 4	1	CVPAPGAGASGGTSPSATQPNPAVFIFEHK	C(UniMod:4)VPAPGAGAS(UniMod:21)GGTSPSATQPNPAVFIFEHK	3	C(UniMod:4)VPAPGAGAS(UniMod:21)GGTSPSATQPNPAVFIFEHK3	224773	540545	250645
O75970	O75970;F5H1U9	MPDZ_HUMAN	MPDZ	Multiple PDZ domain protein	1	DADLSPVNASIIK	DADLS(UniMod:21)PVNASIIK	2	DADLS(UniMod:21)PVNASIIK2	323324	407853	376506
P53621	P53621;A0A3B3IU89;A0A3B3ITV3;A0A3B3ISK1;A0A3B3ISC6;A0A3B3IT15;A0A3B3IS84	COPA_HUMAN	COPA	Coatomer subunit alpha	1	DADSQNPDAPEGK	DADS(UniMod:21)QNPDAPEGK	2	DADS(UniMod:21)QNPDAPEGK2	907225	890070	892196
Q9BVG9	Q9BVG9;E9PS47;E9PLE4	PTSS2_HUMAN	PTDSS2	Phosphatidylserine synthase 2	1	DAGGPRPESPVPAGR	DAGGPRPES(UniMod:21)PVPAGR	2	DAGGPRPES(UniMod:21)PVPAGR2	1.86638e+06	2.05081e+06	1.6031e+06
Q13523	Q13523;H0YDJ3	PRP4B_HUMAN	PRPF4B	Serine/threonine-protein kinase PRP4 homolog	1	DASPINRWSPTR	DAS(UniMod:21)PINRWS(UniMod:21)PTR	2	DAS(UniMod:21)PINRWS(UniMod:21)PTR2	9.08164e+06	1.26722e+07	1.13422e+07
Q00341	Q00341;H0Y394;A0A024R4E5	VIGLN_HUMAN	HDLBP	Vigilin	1	DCDPGSPRR	DC(UniMod:4)DPGS(UniMod:21)PRR	2	DC(UniMod:4)DPGS(UniMod:21)PRR2	698375	764637	766694
P49792	P49792;Q99666;O14715;A6NKT7;Q7Z3J3;J3KQ37;J3KNE0	RBP2_HUMAN	RANBP2	E3 SUMO-protein ligase RanBP2	0	DDDAYKTEDSDDIHFEPVVQMPEK	DDDAYKT(UniMod:21)EDS(UniMod:21)DDIHFEPVVQMPEK	3	DDDAYKT(UniMod:21)EDS(UniMod:21)DDIHFEPVVQMPEK3	1.02828e+06	1.06367e+06	992126
P49792	P49792;Q99666;O14715;A6NKT7;Q7Z3J3;J3KQ37;J3KNE0	RBP2_HUMAN	RANBP2	E3 SUMO-protein ligase RanBP2	0	DDDAYKTEDSDDIHFEPVVQMPEK	DDDAYKTEDS(UniMod:21)DDIHFEPVVQMPEK	3	DDDAYKTEDS(UniMod:21)DDIHFEPVVQMPEK3	1.49063e+06	1.44432e+06	1.48638e+06
P24534	P24534;C9JZW3	EF1B_HUMAN	EEF1B2	Elongation factor 1-beta	1	DDDDIDLFGSDDEEESEEAK	DDDDIDLFGS(UniMod:21)DDEEESEEAK	3	DDDDIDLFGS(UniMod:21)DDEEESEEAK3	336183	258154	196227
P24534	P24534;C9JZW3	EF1B_HUMAN	EEF1B2	Elongation factor 1-beta	1	DDDDIDLFGSDDEEESEEAKR	DDDDIDLFGS(UniMod:21)DDEEESEEAKR	3	DDDDIDLFGS(UniMod:21)DDEEESEEAKR3	4.97384e+06	5.92154e+06	7.09339e+06
Q15649	Q15649	ZNHI3_HUMAN	ZNHIT3	Zinc finger HIT domain-containing protein 3	1	DDDDSIADFLNSDEEEDRVSLQNLK	DDDDSIADFLNS(UniMod:21)DEEEDRVSLQNLK	3	DDDDSIADFLNS(UniMod:21)DEEEDRVSLQNLK3	639901	562167	550975
Q9HCK8	Q9HCK8;A0A2R8Y840;H0YJG4	CHD8_HUMAN	CHD8	Chromodomain-helicase-DNA-binding protein 8	1	DDDLVEFSDLESEDDERPR	DDDLVEFS(UniMod:21)DLES(UniMod:21)EDDERPR	3	DDDLVEFS(UniMod:21)DLES(UniMod:21)EDDERPR3	1.27766e+06	690334	1.09137e+06
O94874	O94874	UFL1_HUMAN	UFL1	E3 UFM1-protein ligase 1	1	DDDSDDESQSSHTGK	DDDS(UniMod:21)DDESQSSHTGK	2	DDDS(UniMod:21)DDESQSSHTGK2	1.12568e+06	1.32165e+06	1.33567e+06
O94874	O94874	UFL1_HUMAN	UFL1	E3 UFM1-protein ligase 1	1	DDDSDDESQSSHTGK	DDDS(UniMod:21)DDESQSSHTGK	3	DDDS(UniMod:21)DDESQSSHTGK3	557763	451896	399957
Q9H1E3	Q9H1E3	NUCKS_HUMAN	NUCKS1	Nuclear ubiquitous casein and cyclin-dependent kinase substrate 1	1	DDSHSAEDSEDEK	DDS(UniMod:21)HS(UniMod:21)AEDS(UniMod:21)EDEK	2	DDS(UniMod:21)HS(UniMod:21)AEDS(UniMod:21)EDEK2	2.4402e+06	2.50019e+06	2.00974e+06
Q9H1E3	Q9H1E3	NUCKS_HUMAN	NUCKS1	Nuclear ubiquitous casein and cyclin-dependent kinase substrate 1	1	DDSHSAEDSEDEK	DDSHS(UniMod:21)AEDS(UniMod:21)EDEK	2	DDSHS(UniMod:21)AEDS(UniMod:21)EDEK2	1.50222e+07	1.84963e+07	1.70012e+07
Q9H1E3	Q9H1E3	NUCKS_HUMAN	NUCKS1	Nuclear ubiquitous casein and cyclin-dependent kinase substrate 1	1	DDSHSAEDSEDEKEDHK	DDSHS(UniMod:21)AEDS(UniMod:21)EDEKEDHK	3	DDSHS(UniMod:21)AEDS(UniMod:21)EDEKEDHK3	1.48536e+06	2.71331e+06	4.07373e+06
Q9H1E3	Q9H1E3	NUCKS_HUMAN	NUCKS1	Nuclear ubiquitous casein and cyclin-dependent kinase substrate 1	1	DDSHSAEDSEDEK	DDSHS(UniMod:21)AEDSEDEK	2	DDSHS(UniMod:21)AEDSEDEK2	662041		956867
Q9H1E3	Q9H1E3	NUCKS_HUMAN	NUCKS1	Nuclear ubiquitous casein and cyclin-dependent kinase substrate 1	1	DDSHSAEDSEDEK	DDSHSAEDS(UniMod:21)EDEK	2	DDSHSAEDS(UniMod:21)EDEK2	398594	659930	704660
Q9H6T3	Q9H6T3	RPAP3_HUMAN	RPAP3	RNA polymerase II-associated protein 3	1	DDSTHESLSQESESEEDGIHVDSQK	DDSTHESLS(UniMod:21)QES(UniMod:21)ES(UniMod:21)EEDGIHVDSQK	3	DDSTHESLS(UniMod:21)QES(UniMod:21)ES(UniMod:21)EEDGIHVDSQK3	2.28076e+06	2.56795e+06	2.67223e+06
Q9H6T3	Q9H6T3	RPAP3_HUMAN	RPAP3	RNA polymerase II-associated protein 3	1	DDSTHESLSQESESEEDGIHVDSQK	DDSTHESLS(UniMod:21)QES(UniMod:21)ESEEDGIHVDSQK	3	DDSTHESLS(UniMod:21)QES(UniMod:21)ESEEDGIHVDSQK3	2.78984e+06	3.14241e+06
Q9H6T3	Q9H6T3	RPAP3_HUMAN	RPAP3	RNA polymerase II-associated protein 3	1	DDSTHESLSQESESEEDGIHVDSQK	DDSTHESLSQES(UniMod:21)ES(UniMod:21)EEDGIHVDSQK	3	DDSTHESLSQES(UniMod:21)ES(UniMod:21)EEDGIHVDSQK3			3.47904e+06
Q5F1R6	Q5F1R6;A0A2R8Y534;A0A2R8Y4Q0;A0A2R8Y4N5	DJC21_HUMAN	DNAJC21	DnaJ homolog subfamily C member 21	1	DEEDGKDSDEAEDAELYDDLYCPACDK	DEEDGKDS(UniMod:21)DEAEDAELYDDLYC(UniMod:4)PAC(UniMod:4)DK	3	DEEDGKDS(UniMod:21)DEAEDAELYDDLYC(UniMod:4)PAC(UniMod:4)DK3	1.10445e+06	1.10188e+06	1.04484e+06
P06748	P06748;A0A7I2V579;A0A7I2V433;A0A7I2V4G8;A0A7I2V2X9;A0A7I2YQC0;A0A7I2V3U2;A0A7I2V5S2;A0A7I2V3G5	NPM_HUMAN	NPM1	Nucleophosmin	1	DELHIVEAEAMNYEGSPIK	DELHIVEAEAMNYEGS(UniMod:21)PIK	3	DELHIVEAEAMNYEGS(UniMod:21)PIK3	4.24145e+07	4.32499e+07	4.14333e+07
P46821	P46821	MAP1B_HUMAN	MAP1B	Microtubule-associated protein 1B	1	DENERASVSPMDEPVPDSESPIEK	DENERAS(UniMod:21)VS(UniMod:21)PMDEPVPDSES(UniMod:21)PIEK	3	DENERAS(UniMod:21)VS(UniMod:21)PMDEPVPDSES(UniMod:21)PIEK3		388125
Q7Z6Z7	Q7Z6Z7;H0Y659	HUWE1_HUMAN	HUWE1	E3 ubiquitin-protein ligase HUWE1	1	DEPPPLSPAPLTPATPSSLDPFFSR	DEPPPLS(UniMod:21)PAPLT(UniMod:21)PATPSSLDPFFSR	3	DEPPPLS(UniMod:21)PAPLT(UniMod:21)PATPSSLDPFFSR3	935274	985965	718498
P17535	P17535;U3KPR5	JUND_HUMAN	JUND	Transcription factor JunD	1	DEPQTVPDVPSFGESPPLSPIDMDTQER	DEPQTVPDVPSFGES(UniMod:21)PPLS(UniMod:21)PIDMDTQER	3	DEPQTVPDVPSFGES(UniMod:21)PPLS(UniMod:21)PIDMDTQER3	808754	1.22823e+06	362919
P15408	P15408;C9JCN8	FOSL2_HUMAN	FOSL2	Fos-related antigen 2	1	DEQLSPEEEEK	DEQLS(UniMod:21)PEEEEK	2	DEQLS(UniMod:21)PEEEEK2	45781.6
Q02880	Q02880	TOP2B_HUMAN	TOP2B	DNA topoisomerase 2-beta	1	DEYTFSPGK	DEYTFS(UniMod:21)PGK	2	DEYTFS(UniMod:21)PGK2		480983
Q92545	Q92545	TM131_HUMAN	TMEM131	Transmembrane protein 131	1	DFDHHDSPALEVFTEQPPSPLPK	DFDHHDSPALEVFTEQPPS(UniMod:21)PLPK	3	DFDHHDSPALEVFTEQPPS(UniMod:21)PLPK3	604366	821945	839143
P46100	P46100;A0A096LNW1;A0A096LNL9	ATRX_HUMAN	ATRX	Transcriptional regulator ATRX	1	DFDSSEDEK	DFDS(UniMod:21)S(UniMod:21)EDEK	2	DFDS(UniMod:21)S(UniMod:21)EDEK2	3.2605e+06	3.75722e+06	2.09509e+06
Q6ZW31	Q6ZW31;M0QXZ8	SYDE1_HUMAN	SYDE1	Rho GTPase-activating protein SYDE1	1	DFLSGPDYDHVTGSDSEDEDEEVGEPR	DFLSGPDYDHVT(UniMod:21)GSDS(UniMod:21)EDEDEEVGEPR	3	DFLSGPDYDHVT(UniMod:21)GSDS(UniMod:21)EDEDEEVGEPR3	588921	826113	626779
O43237	O43237;B4E2E0;H3BUM4	DC1L2_HUMAN	DYNC1LI2	Cytoplasmic dynein 1 light intermediate chain 2	1	DFQDYMEPEEGCQGSPQR	DFQDYMEPEEGC(UniMod:4)QGS(UniMod:21)PQR	3	DFQDYMEPEEGC(UniMod:4)QGS(UniMod:21)PQR3	704517	831900	999287
O43237	O43237;B4E2E0;H3BUM4	DC1L2_HUMAN	DYNC1LI2	Cytoplasmic dynein 1 light intermediate chain 2	1	DFQDYMEPEEGCQGSPQRR	DFQDYMEPEEGC(UniMod:4)QGS(UniMod:21)PQRR	3	DFQDYMEPEEGC(UniMod:4)QGS(UniMod:21)PQRR3		447179
Q6WCQ1	Q6WCQ1;A0A494BZV2;A0A1W2PPU9	MPRIP_HUMAN	MPRIP	Myosin phosphatase Rho-interacting protein	1	DFTNEAPPAPLPDASASPLSPHRR	DFTNEAPPAPLPDASASPLS(UniMod:21)PHRR	3	DFTNEAPPAPLPDASASPLS(UniMod:21)PHRR3	1.72485e+06	1.80073e+06	1.7087e+06
Q14135	Q14135;A0A0A6YYI5;A0A075B6E4;G5E9M9;G5E9M7	VGLL4_HUMAN	VGLL4	Transcription cofactor vestigial-like protein 4	1	DGASSSPESASR	DGASS(UniMod:21)SPESASR	2	DGASS(UniMod:21)SPESASR2		121332	215636
P25205	P25205;J3KQ69;Q7Z6P5;A0A499FHX9	MCM3_HUMAN	MCM3	DNA replication licensing factor MCM3	1	DGDSYDPYDFSDTEEEMPQVHTPK	DGDSYDPY(UniMod:21)DFS(UniMod:21)DTEEEMPQVHT(UniMod:21)PK	3	DGDSYDPY(UniMod:21)DFS(UniMod:21)DTEEEMPQVHT(UniMod:21)PK3	7.83066e+06		7.31066e+06
P25205	P25205;J3KQ69;Q7Z6P5;A0A499FHX9	MCM3_HUMAN	MCM3	DNA replication licensing factor MCM3	1	DGDSYDPYDFSDTEEEMPQVHTPK	DGDSYDPY(UniMod:21)DFS(UniMod:21)DTEEEMPQVHTPK	3	DGDSYDPY(UniMod:21)DFS(UniMod:21)DTEEEMPQVHTPK3	3.05766e+06	3.73645e+06	3.10698e+06
P25205	P25205;J3KQ69;Q7Z6P5;A0A499FHX9	MCM3_HUMAN	MCM3	DNA replication licensing factor MCM3	1	DGDSYDPYDFSDTEEEMPQVHTPK	DGDSYDPYDFS(UniMod:21)DT(UniMod:21)EEEMPQVHT(UniMod:21)PK	3	DGDSYDPYDFS(UniMod:21)DT(UniMod:21)EEEMPQVHT(UniMod:21)PK3		1.03367e+07
P25205	P25205;J3KQ69;Q7Z6P5;A0A499FHX9	MCM3_HUMAN	MCM3	DNA replication licensing factor MCM3	1	DGDSYDPYDFSDTEEEMPQVHTPK	DGDSYDPYDFS(UniMod:21)DTEEEMPQVHT(UniMod:21)PK	3	DGDSYDPYDFS(UniMod:21)DTEEEMPQVHT(UniMod:21)PK3	2.61206e+07	3.21147e+07	2.74796e+07
P25205	P25205;J3KQ69;Q7Z6P5;A0A499FHX9	MCM3_HUMAN	MCM3	DNA replication licensing factor MCM3	1	DGDSYDPYDFSDTEEEMPQVHTPK	DGDSYDPYDFS(UniMod:21)DTEEEMPQVHTPK	3	DGDSYDPYDFS(UniMod:21)DTEEEMPQVHTPK3	1.20174e+07	1.36158e+07	1.20357e+07
Q58WW2	Q58WW2;F2Z305	DCAF6_HUMAN	DCAF6	DDB1- and CUL4-associated factor 6	1	DGEQSPNVSLMQR	DGEQS(UniMod:21)PNVSLMQR	2	DGEQS(UniMod:21)PNVSLMQR2	736886	806491	675719
Q9P2D1	Q9P2D1	CHD7_HUMAN	CHD7	Chromodomain-helicase-DNA-binding protein 7	1	DGETLEGSDAEESLDK	DGETLEGS(UniMod:21)DAEESLDK	2	DGETLEGS(UniMod:21)DAEESLDK2	529346	485178
Q7Z6Z7	Q7Z6Z7	HUWE1_HUMAN	HUWE1	E3 ubiquitin-protein ligase HUWE1	1	DGGSGNSTIIVSR	DGGS(UniMod:21)GNS(UniMod:21)TIIVSR	2	DGGS(UniMod:21)GNS(UniMod:21)TIIVSR2	1.52883e+06	2.00497e+06	1.58092e+06
Q9NWH9	Q9NWH9;H0YL55;H7BXE3	SLTM_HUMAN	SLTM	SAFB-like transcription modulator	1	DGQDAIAQSPEK	DGQDAIAQS(UniMod:21)PEK	2	DGQDAIAQS(UniMod:21)PEK2	1.24025e+07	1.43916e+07	1.40394e+07
P06241	P06241;E5RFM0;E5RHX7;E5RIX5;E5RK23;E5RFM6;E5RGM6;E5RHF7;E5RFS5;E5RI25;E5RGT0;E5RH71;E5RJX7;E5RFM4	FYN_HUMAN	FYN	Tyrosine-protein kinase Fyn	1	DGSLNQSSGYR	DGS(UniMod:21)LNQSSGYR	2	DGS(UniMod:21)LNQSSGYR2	325205	305030	227604
Q9UKS6	Q9UKS6;A0A0C4DGG1	PACN3_HUMAN	PACSIN3	Protein kinase C and casein kinase substrate in neurons protein 3	1	DGTAPPPQSPGSPGTGQDEEWSDEESPRK	DGTAPPPQS(UniMod:21)PGSPGTGQDEEWS(UniMod:21)DEESPRK	3	DGTAPPPQS(UniMod:21)PGSPGTGQDEEWS(UniMod:21)DEESPRK3		2.61957e+06	1.70199e+06
Q9UKS6	Q9UKS6;A0A0C4DGG1	PACN3_HUMAN	PACSIN3	Protein kinase C and casein kinase substrate in neurons protein 3	1	DGTAPPPQSPGSPGTGQDEEWSDEESPRK	DGTAPPPQSPGSPGTGQDEEWS(UniMod:21)DEESPRK	3	DGTAPPPQSPGSPGTGQDEEWS(UniMod:21)DEESPRK3	1.05946e+07	1.27891e+07	1.16776e+07
Q9H501	Q9H501	ESF1_HUMAN	ESF1	ESF1 homolog	1	DGTSPEEEIEIER	DGTS(UniMod:21)PEEEIEIER	2	DGTS(UniMod:21)PEEEIEIER2		127937	123342
Q9Y490	Q9Y490	TLN1_HUMAN	TLN1	Talin-1	1	DHFGLEGDEESTMLEDSVSPKK	DHFGLEGDEESTMLEDSVS(UniMod:21)PKK	3	DHFGLEGDEESTMLEDSVS(UniMod:21)PKK3	3.14783e+06	3.0712e+06	3.30523e+06
Q9Y3B9	Q9Y3B9	RRP15_HUMAN	RRP15	RRP15-like protein	1	DHFYSDDDAIEADSEGDAEPCDK	DHFYS(UniMod:21)DDDAIEADS(UniMod:21)EGDAEPC(UniMod:4)DK	3	DHFYS(UniMod:21)DDDAIEADS(UniMod:21)EGDAEPC(UniMod:4)DK3	9.24918e+06	1.1397e+07	1.09395e+07
Q9Y3B9	Q9Y3B9	RRP15_HUMAN	RRP15	RRP15-like protein	1	DHFYSDDDAIEADSEGDAEPCDK	DHFYS(UniMod:21)DDDAIEADSEGDAEPC(UniMod:4)DK	3	DHFYS(UniMod:21)DDDAIEADSEGDAEPC(UniMod:4)DK3	345607	351487	365970
O60238	O60238;H0YBC7	BNI3L_HUMAN	BNIP3L	BCL2/adenovirus E1B 19 kDa protein-interacting protein 3-like	1	DHSSQSEEEVVEGEK	DHSSQS(UniMod:21)EEEVVEGEK	2	DHSSQS(UniMod:21)EEEVVEGEK2	230564	396735	243518
Q9UIG0	Q9UIG0	BAZ1B_HUMAN	BAZ1B	Tyrosine-protein kinase BAZ1B	1	DHTVSGDEDYCPR	DHTVS(UniMod:21)GDEDYC(UniMod:4)PR	2	DHTVS(UniMod:21)GDEDYC(UniMod:4)PR2	1.67396e+06	1.63015e+06	1.55111e+06
P25490	P25490;H0YJV7;A0A494C032;H0YJU4	TYY1_HUMAN	YY1	Transcriptional repressor protein YY1	1	DIDHETVVEEQIIGENSPPDYSEYMTGK	DIDHETVVEEQIIGENS(UniMod:21)PPDYSEYMTGK	3	DIDHETVVEEQIIGENS(UniMod:21)PPDYSEYMTGK3	4.7969e+06	5.23276e+06	5.07446e+06
Q09666	Q09666	AHNK_HUMAN	AHNAK	Neuroblast differentiation-associated protein AHNAK	1	DIDISSPEFK	DIDISS(UniMod:21)PEFK	2	DIDISS(UniMod:21)PEFK2	8.53372e+06	1.11781e+07	9.66682e+06
Q4LE39	Q4LE39;H7C5R6;H0Y7Y8	ARI4B_HUMAN	ARID4B	AT-rich interactive domain-containing protein 4B	1	DIEVLSEDTDYEEDEVTKK	DIEVLS(UniMod:21)EDT(UniMod:21)DYEEDEVTKK	3	DIEVLS(UniMod:21)EDT(UniMod:21)DYEEDEVTKK3	375661	651414	547776
Q96GX9	Q96GX9;S4R3D6	MTNB_HUMAN	APIP	Methylthioribulose-1-phosphate dehydratase	1	DISGPSPSK	DISGPS(UniMod:21)PSK	2	DISGPS(UniMod:21)PSK2	2.43263e+06	2.64973e+06	2.45082e+06
Q7L2J0	Q7L2J0	MEPCE_HUMAN	MEPCE	7SK snRNA methylphosphate capping enzyme	1	DITDPLSLNTCTDEGHVVLASPLK	DITDPLSLNTC(UniMod:4)TDEGHVVLAS(UniMod:21)PLK	3	DITDPLSLNTC(UniMod:4)TDEGHVVLAS(UniMod:21)PLK3	722696
O43719	O43719	HTSF1_HUMAN	HTATSF1	HIV Tat-specific factor 1	1	DLDEEGSEK	DLDEEGS(UniMod:21)EK	2	DLDEEGS(UniMod:21)EK2	1.2193e+07	1.24977e+07	1.16149e+07
Q5T3I0	Q5T3I0;A0A0A0MRK1;F8W895;E9PAV9	GPTC4_HUMAN	GPATCH4	G patch domain-containing protein 4	1	DLESCSDDDNQGSK	DLES(UniMod:21)C(UniMod:4)S(UniMod:21)DDDNQGSK	2	DLES(UniMod:21)C(UniMod:4)S(UniMod:21)DDDNQGSK2	1.70411e+06	1.93446e+06	1.73052e+06
Q5T3I0	Q5T3I0;A0A0A0MRK1;F8W895;E9PAV9	GPTC4_HUMAN	GPATCH4	G patch domain-containing protein 4	1	DLESCSDDDNQGSK	DLESC(UniMod:4)S(UniMod:21)DDDNQGSK	2	DLESC(UniMod:4)S(UniMod:21)DDDNQGSK2	1.2057e+06	1.43685e+06	1.26938e+06
Q9Y3T9	Q9Y3T9	NOC2L_HUMAN	NOC2L	Nucleolar complex protein 2 homolog	1	DLFDLNSSEEDDTEGFSER	DLFDLNS(UniMod:21)S(UniMod:21)EEDDTEGFSER	3	DLFDLNS(UniMod:21)S(UniMod:21)EEDDTEGFSER3	286391	282433	460548
Q9NYF8	Q9NYF8;A0A1W2PQ43;E9PK91;E9PK09;E9PKI6;E9PQN2	BCLF1_HUMAN	BCLAF1	Bcl-2-associated transcription factor 1	1	DLFDYSPPLHK	DLFDYS(UniMod:21)PPLHK	2	DLFDYS(UniMod:21)PPLHK2	7.399e+06	7.88866e+06	7.40049e+06
O60763	O60763	USO1_HUMAN	USO1	General vesicular transport factor p115	1	DLGHPVEEEDELESGDQEDEDDESEDPGK	DLGHPVEEEDELES(UniMod:21)GDQEDEDDESEDPGK	3	DLGHPVEEEDELES(UniMod:21)GDQEDEDDESEDPGK3	1.29663e+07	1.36964e+07	1.40785e+07
P42677	P42677	RS27_HUMAN	RPS27	40S ribosomal protein S27	1	DLLHPSPEEEK	DLLHPS(UniMod:21)PEEEK	2	DLLHPS(UniMod:21)PEEEK2	1.89279e+06	2.50426e+06	2.38542e+06
Q96RL1	Q96RL1	UIMC1_HUMAN	UIMC1	BRCA1-A complex subunit RAP80	1	DLNESPVK	DLNES(UniMod:21)PVK	2	DLNES(UniMod:21)PVK2	835264	928531	1.14219e+06
Q9Y534	Q9Y534;H7C4E7	CSDC2_HUMAN	CSDC2	Cold shock domain-containing protein C2	1	DLPSPLPTK	DLPS(UniMod:21)PLPTK	2	DLPS(UniMod:21)PLPTK2	168669	243283	296052
Q13541	Q13541	4EBP1_HUMAN	EIF4EBP1	Eukaryotic translation initiation factor 4E-binding protein 1	1	DLPTIPGVTSPSSDEPPMEASQSHLR	DLPTIPGVTS(UniMod:21)PSSDEPPMEASQSHLR	3	DLPTIPGVTS(UniMod:21)PSSDEPPMEASQSHLR3	1.3788e+06	1.55665e+06	1.62933e+06
Q9P2B4	Q9P2B4	CT2NL_HUMAN	CTTNBP2NL	CTTNBP2 N-terminal-like protein	1	DLSPTLIDNSAAK	DLS(UniMod:21)PTLIDNSAAK	2	DLS(UniMod:21)PTLIDNSAAK2	318082	341048	421638
Q53LP3	Q53LP3	SWAHC_HUMAN	SOWAHC	Ankyrin repeat domain-containing protein SOWAHC	1	DLVMGSSPQLK	DLVMGSS(UniMod:21)PQLK	2	DLVMGSS(UniMod:21)PQLK2	538909	643492	564377
Q6PJT7	Q6PJT7;H0YJA2;G3V4R5;G3V411	ZC3HE_HUMAN	ZC3H14	Zinc finger CCCH domain-containing protein 14	1	DLVQPDKPASPK	DLVQPDKPAS(UniMod:21)PK	2	DLVQPDKPAS(UniMod:21)PK2	5.35271e+06	5.60567e+06	5.72482e+06
A0A804HKE7;E7EVA0	P27816;A0A804HKE7;E7EVA0	A0A804HKE7_HUMAN;E7EVA0_HUMAN	MAP4	Microtubule-associated protein	1	DMSPLSETEMALGK	DMS(UniMod:21)PLSETEMALGK	2	DMS(UniMod:21)PLSETEMALGK2	1.41379e+06	1.82881e+06	1.3313e+06
Q5SW79	Q5SW79;H0YB66;H0Y2V6	CE170_HUMAN	CEP170	Centrosomal protein of 170 kDa	1	DNDDDQSDKGTYTIELENPNSEEVEAR	DNDDDQS(UniMod:21)DKGT(UniMod:21)YTIELENPNSEEVEAR	3	DNDDDQS(UniMod:21)DKGT(UniMod:21)YTIELENPNSEEVEAR3	2.83837e+06	3.12176e+06	2.93125e+06
Q5SW79	Q5SW79;H0YB66;H0Y2V6	CE170_HUMAN	CEP170	Centrosomal protein of 170 kDa	1	DNDDDQSDKGTYTIELENPNSEEVEAR	DNDDDQSDKGT(UniMod:21)YT(UniMod:21)IELENPNSEEVEAR	3	DNDDDQSDKGT(UniMod:21)YT(UniMod:21)IELENPNSEEVEAR3	2.78081e+06
Q9UDY2	Q9UDY2;A0A1B0GTW1;A0A3B3ITE1;A0A2R8YDH4;A0A3B3IRI3	ZO2_HUMAN	TJP2	Tight junction protein ZO-2	1	DNSPPPAFKPEPPK	DNS(UniMod:21)PPPAFKPEPPK	2	DNS(UniMod:21)PPPAFKPEPPK2	299260	326095	344500
Q9BQG0	Q9BQG0	MBB1A_HUMAN	MYBBP1A	Myb-binding protein 1A	1	DPAQPMSPGEATQSGAR	DPAQPMS(UniMod:21)PGEATQSGAR	2	DPAQPMS(UniMod:21)PGEATQSGAR2	1.45279e+06	1.67053e+06	1.65587e+06
Q14934	Q14934	NFAC4_HUMAN	NFATC4	Nuclear factor of activated T-cells, cytoplasmic 4	1	DPGSPGPFDYVGAPPAESIPQK	DPGS(UniMod:21)PGPFDYVGAPPAESIPQK	3	DPGS(UniMod:21)PGPFDYVGAPPAESIPQK3	301474	420130	241644
Q32P44	Q32P44;H0Y3M3;B7WPE2;G3V1D0	EMAL3_HUMAN	EML3	Echinoderm microtubule-associated protein-like 3	1	DPLSSPGGPGSR	DPLSS(UniMod:21)PGGPGSR	2	DPLSS(UniMod:21)PGGPGSR2	226470	266120	268641
P18206	P18206	VINC_HUMAN	VCL	Vinculin	1	DPSASPGDAGEQAIR	DPSAS(UniMod:21)PGDAGEQAIR	2	DPSAS(UniMod:21)PGDAGEQAIR2	858032	1.01377e+06	889998
Q12888	Q12888;A6NNK5	TP53B_HUMAN	TP53BP1	TP53-binding protein 1	1	DPVSPASQK	DPVS(UniMod:21)PASQK	2	DPVS(UniMod:21)PASQK2	1.19372e+06	1.35348e+06	1.30666e+06
O00712	O00712;A0A1B0GU97;A0A1B0GVN4;Q5VW27;Q5VW30;U3KQE8;A0A1B0GWB8;A0A1B0GW37;A0A0A0MRX8;A0A1B0GWJ4;A0A1B0GWI9;Q5VW26;Q5VW31;A0A2R8Y7V8	NFIB_HUMAN	NFIB	Nuclear factor 1 B-type	1	DQDMSSPTTMK	DQDMSS(UniMod:21)PTTMK	2	DQDMSS(UniMod:21)PTTMK2	330183		254247
A0A4W8VX11;A0A5H1ZRS1	A0A4W8VX11;E9PGW9;E7EV93;A0A5H1ZRS1	A0A4W8VX11_HUMAN;A0A5H1ZRS1_HUMAN	PCM1	Pericentriolar material 1 protein	1	DQHLNNSSSSPQR	DQHLNNS(UniMod:21)SSSPQR	2	DQHLNNS(UniMod:21)SSSPQR2	203805	282243	246197
Q14676	Q14676	MDC1_HUMAN	MDC1	Mediator of DNA damage checkpoint protein 1	1	DQPPFGDSDDSVEADKSSPGIHLER	DQPPFGDS(UniMod:21)DDS(UniMod:21)VEADKSS(UniMod:21)PGIHLER	3	DQPPFGDS(UniMod:21)DDS(UniMod:21)VEADKSS(UniMod:21)PGIHLER3	1.5503e+06	2.67536e+06	2.31821e+06
Q9NXG2	Q9NXG2;H3BNW0	THUM1_HUMAN	THUMPD1	THUMP domain-containing protein 1	1	DQQPSGSEGEDDDAEAALK	DQQPS(UniMod:21)GS(UniMod:21)EGEDDDAEAALK	3	DQQPS(UniMod:21)GS(UniMod:21)EGEDDDAEAALK3	172500	291229	263749
Q9NXG2	Q9NXG2;H3BNW0	THUM1_HUMAN	THUMPD1	THUMP domain-containing protein 1	1	DQQPSGSEGEDDDAEAALKK	DQQPS(UniMod:21)GS(UniMod:21)EGEDDDAEAALKK	3	DQQPS(UniMod:21)GS(UniMod:21)EGEDDDAEAALKK3	1.10496e+07	1.18834e+07	1.09911e+07
Q5T200	Q5T200;A0A7I2V4I5	ZC3HD_HUMAN	ZC3H13	Zinc finger CCCH domain-containing protein 13	1	DQRPSSPIR	DQRPSS(UniMod:21)PIR	2	DQRPSS(UniMod:21)PIR2	1.41159e+06	1.69961e+06	1.65661e+06
Q9P206	Q9P206	K1522_HUMAN	KIAA1522	Uncharacterized protein KIAA1522	1	DQSPPPSPPPSYHPPPPPTK	DQS(UniMod:21)PPPS(UniMod:21)PPPSYHPPPPPTK	3	DQS(UniMod:21)PPPS(UniMod:21)PPPSYHPPPPPTK3	2.80337e+06	3.21045e+06	2.95216e+06
Q8NHG8	Q8NHG8	ZNRF2_HUMAN	ZNRF2	E3 ubiquitin-protein ligase ZNRF2	1	DRPVGGSPGGPR	DRPVGGS(UniMod:21)PGGPR	2	DRPVGGS(UniMod:21)PGGPR2	2.06363e+06	2.45737e+06	3.27389e+06
Q5JTV8	Q5JTV8;H0YDU3;A0A0A0MSK5;J3KN66	TOIP1_HUMAN	TOR1AIP1	Torsin-1A-interacting protein 1	1	DSHSSEEDEASSQTDLSQTISKK	DS(UniMod:21)HS(UniMod:21)SEEDEASSQTDLSQTISKK	3	DS(UniMod:21)HS(UniMod:21)SEEDEASSQTDLSQTISKK3	314391		254237
Q86SQ0	Q86SQ0;G5E9V3;A0A1W2PQ63;E9PGF6;E9PFQ4	PHLB2_HUMAN	PHLDB2	Pleckstrin homology-like domain family B member 2	1	DSLPDADLASCGSLSQSSASFFTPR	DS(UniMod:21)LPDADLAS(UniMod:21)C(UniMod:4)GS(UniMod:21)LSQSSASFFTPR	3	DS(UniMod:21)LPDADLAS(UniMod:21)C(UniMod:4)GS(UniMod:21)LSQSSASFFTPR3	100129	84200.4	78937.8
Q9HD20	Q9HD20	AT131_HUMAN	ATP13A1	Endoplasmic reticulum transmembrane helix translocase	1	DSPTLSNSGIR	DS(UniMod:21)PTLSNSGIR	2	DS(UniMod:21)PTLSNSGIR2	261942	117459	74668.3
Q5T1M5	Q5T1M5;A0A8I5KQM8;A0A8I5KX71;A0A8I5QJL3;A0A8I5KRH4;A0A8I5QJ94;A0A8I5KXA6;A0A8I5KV70	FKB15_HUMAN	FKBP15	FK506-binding protein 15	1	DSAAPSPIPGADNLSADPVVSPPTSIPFK	DSAAPSPIPGADNLS(UniMod:21)ADPVVSPPTSIPFK	3	DSAAPSPIPGADNLS(UniMod:21)ADPVVSPPTSIPFK3	36434.1	221596	210338
Q58WW2	Q58WW2	DCAF6_HUMAN	DCAF6	DDB1- and CUL4-associated factor 6	1	DSALQDTDDSDDDPVLIPGAR	DSALQDT(UniMod:21)DDS(UniMod:21)DDDPVLIPGAR	3	DSALQDT(UniMod:21)DDS(UniMod:21)DDDPVLIPGAR3	299248	464083	317785
P07478	P07478;A6XMV9;A0A0J9YYC8	TRY2_HUMAN	PRSS2	Trypsin-2	1	DSCQGDSGGPVVSNGELQGIVSWGYGCAQK	DSC(UniMod:4)QGDS(UniMod:21)GGPVVSNGELQGIVSWGYGC(UniMod:4)AQK	3	DSC(UniMod:4)QGDS(UniMod:21)GGPVVSNGELQGIVSWGYGC(UniMod:4)AQK3	16659.2	16667.3	34349.7
P51532	P51532;A0A2R8Y4C5;A0A2R8YG32;A0A2R8Y6V2;A0A2R8YDA1;K7EQF0;A0A2R8YF58;K7EP28;A0A2R8YFK5;A0A2R8Y440;A0A2R8Y5K3;Q9HBD4;A0A2R8Y526;A0A2R8Y7F3;A0A2R8Y4P4;A0A2R8Y6N0;A0A2R8YF80;A0A2R8Y7Y7;A0A2R8Y7S2;A0A2R8YGG3;A0A2R8Y523	SMCA4_HUMAN	SMARCA4	Transcription activator BRG1	1	DSDAGSSTPTTSTR	DSDAGSS(UniMod:21)TPTTSTR	2	DSDAGSS(UniMod:21)TPTTSTR2	306946	287478	292631
O94979	O94979;D6RHZ5;D6REX3;H0Y8V7	SC31A_HUMAN	SEC31A	Protein transport protein Sec31A	1	DSDQVAQSDGEESPAAEEQLLGEHIK	DSDQVAQS(UniMod:21)DGEES(UniMod:21)PAAEEQLLGEHIK	3	DSDQVAQS(UniMod:21)DGEES(UniMod:21)PAAEEQLLGEHIK3	1.9493e+06	2.32166e+06	1.87574e+06
O94979	O94979;D6RHZ5;D6REX3;H0Y8V7	SC31A_HUMAN	SEC31A	Protein transport protein Sec31A	1	DSDQVAQSDGEESPAAEEQLLGEHIKEEK	DSDQVAQS(UniMod:21)DGEESPAAEEQLLGEHIKEEK	3	DSDQVAQS(UniMod:21)DGEESPAAEEQLLGEHIKEEK3	181877	351660	225200
Q14676	Q14676	MDC1_HUMAN	MDC1	Mediator of DNA damage checkpoint protein 1	1	DSDTDVEEEELPVENR	DSDT(UniMod:21)DVEEEELPVENR	2	DSDT(UniMod:21)DVEEEELPVENR2	188561	213674	220188
Q96T58	Q96T58	MINT_HUMAN	SPEN	Msx2-interacting protein	1	DSELKTPPSVGPPSVTVVTLESAPSALEK	DSELKTPPS(UniMod:21)VGPPSVT(UniMod:21)VVTLESAPSALEK	3	DSELKTPPS(UniMod:21)VGPPSVT(UniMod:21)VVTLESAPSALEK3	343207	374046	265110
Q53EL6	Q53EL6;Q5VZS7	PDCD4_HUMAN	PDCD4	Programmed cell death protein 4	1	DSGRGDSVSDSGSDALR	DSGRGDS(UniMod:21)VSDSGSDALR	2	DSGRGDS(UniMod:21)VSDSGSDALR2	2.496e+06	2.23649e+06	1.91966e+06
Q08499	Q08499;A0A1B0GW84	PDE4D_HUMAN	PDE4D	cAMP-specific 3',5'-cyclic phosphodiesterase 4D	1	DSGSQVEEDTSCSDSK	DSGS(UniMod:21)QVEEDTSC(UniMod:4)SDSK	2	DSGS(UniMod:21)QVEEDTSC(UniMod:4)SDSK2	182460	63286.7	225937
Q6WKZ4	Q6WKZ4;E7EX40	RFIP1_HUMAN	RAB11FIP1	Rab11 family-interacting protein 1	1	DSGSDTASAIIPSTTPSVDSDDESVVK	DSGSDTASAIIPSTTPS(UniMod:21)VDSDDESVVK	3	DSGSDTASAIIPSTTPS(UniMod:21)VDSDDESVVK3	553369	829392	465331
Q86VQ1	Q86VQ1;H7C0B2	GLCI1_HUMAN	GLCCI1	Glucocorticoid-induced transcript 1 protein	1	DSGSSSPLPK	DSGSS(UniMod:21)SPLPK	2	DSGSS(UniMod:21)SPLPK2	177262	240246	316330
Q5JTV8	Q5JTV8;H0YDU3;A0A0A0MSK5;J3KN66	TOIP1_HUMAN	TOR1AIP1	Torsin-1A-interacting protein 1	1	DSHSSEEDEASSQTDLSQTISK	DSHS(UniMod:21)S(UniMod:21)EEDEASSQTDLSQTISK	3	DSHS(UniMod:21)S(UniMod:21)EEDEASSQTDLSQTISK3	4.32618e+06	4.36832e+06	5.1282e+06
Q9NVM9	Q9NVM9;H0YH12	INT13_HUMAN	INTS13	Integrator complex subunit 13	1	DSPDSPEPPNK	DSPDS(UniMod:21)PEPPNK	2	DSPDS(UniMod:21)PEPPNK2	3.37034e+06	3.43412e+06	3.37818e+06
Q6P2E9	Q6P2E9	EDC4_HUMAN	EDC4	Enhancer of mRNA-decapping protein 4	1	DSQDASAEQSDHDDEVASLASASGGFGTK	DSQDASAEQS(UniMod:21)DHDDEVASLASASGGFGTK	3	DSQDASAEQS(UniMod:21)DHDDEVASLASASGGFGTK3	1.54384e+06	1.66679e+06	1.69724e+06
Q12906	Q12906	ILF3_HUMAN	ILF3	Interleukin enhancer-binding factor 3	1	DSSKGEDSAEETEAK	DSS(UniMod:21)KGEDS(UniMod:21)AEETEAK	2	DSS(UniMod:21)KGEDS(UniMod:21)AEETEAK2		582653	688640
Q12906	Q12906	ILF3_HUMAN	ILF3	Interleukin enhancer-binding factor 3	1	DSSKGEDSAEETEAK	DSS(UniMod:21)KGEDSAEET(UniMod:21)EAK	2	DSS(UniMod:21)KGEDSAEET(UniMod:21)EAK2	475659
Q12906	Q12906	ILF3_HUMAN	ILF3	Interleukin enhancer-binding factor 3	1	DSSKGEDSAEETEAK	DSS(UniMod:21)KGEDSAEETEAK	2	DSS(UniMod:21)KGEDSAEETEAK2		2.63433e+07	3.00597e+07
Q12906	Q12906	ILF3_HUMAN	ILF3	Interleukin enhancer-binding factor 3	1	DSSKGEDSAEETEAK	DSSKGEDS(UniMod:21)AEETEAK	2	DSSKGEDS(UniMod:21)AEETEAK2	2.34032e+07	2.85384e+07	3.0623e+07
P08913	P08913	ADA2A_HUMAN	ADRA2A	Alpha-2A adrenergic receptor	1	DTDALDLEESSSSDHAERPPGPR	DTDALDLEES(UniMod:21)SSSDHAERPPGPR	3	DTDALDLEES(UniMod:21)SSSDHAERPPGPR3	415562	435726	385430
Q9UPQ0	Q9UPQ0;D6RD46;G5EA03;D6RGH8;E9PDJ9;E7EPK0;D6RJ93;D6R8Y0;Q6NVB9	LIMC1_HUMAN	LIMCH1	LIM and calponin homology domains-containing protein 1	1	DTDDIESPKR	DTDDIES(UniMod:21)PKR	2	DTDDIES(UniMod:21)PKR2	1.59958e+06	1.77854e+06	1.71117e+06
Q9UBL3	Q9UBL3	ASH2L_HUMAN	ASH2L	Set1/Ash2 histone methyltransferase complex subunit ASH2	1	DTLEGAGDTSEVMDTQAGSVDEENGR	DTLEGAGDTSEVMDTQAGS(UniMod:21)VDEENGR	3	DTLEGAGDTSEVMDTQAGS(UniMod:21)VDEENGR3	392240	365261	514259
Q86WB0	Q86WB0;F8WAU5;C9J0I9	ZC3C1_HUMAN	ZC3HC1	Zinc finger C3HC-type protein 1	1	DTSATSQSVNGSPQAEQPSLESTSK	DTSATSQSVNGS(UniMod:21)PQAEQPSLESTSK	3	DTSATSQSVNGS(UniMod:21)PQAEQPSLESTSK3	823717	894997	789434
P43243	A0A0R4J2E8;P43243;D6REM6;A8MXP9;B3KM87	MATR3_HUMAN	MATR3	Matrin-3	1	DTSENADGQSDENK	DTSENADGQS(UniMod:21)DENK	2	DTSENADGQS(UniMod:21)DENK2	4.22424e+06	4.56348e+06	4.29666e+06
P43243	A0A0R4J2E8;P43243;D6REM6;A8MXP9;B3KM87	MATR3_HUMAN	MATR3	Matrin-3	1	DTSENADGQSDENKDDYTIPDEYR	DTSENADGQS(UniMod:21)DENKDDYTIPDEYR	3	DTSENADGQS(UniMod:21)DENKDDYTIPDEYR3	1.02388e+07	1.06055e+07	1.22157e+07
Q9H4L7	Q9H4L7;D6RAY8	SMRCD_HUMAN	SMARCAD1	SWI/SNF-related matrix-associated actin-dependent regulator of chromatin subfamily A containing DEAD/H box 1	1	DTVIIVSEPSEDEESQGLPTMAR	DTVIIVS(UniMod:21)EPS(UniMod:21)EDEESQGLPTMAR	3	DTVIIVS(UniMod:21)EPS(UniMod:21)EDEESQGLPTMAR3	2.21803e+06	2.59433e+06	2.16075e+06
P46821	P46821	MAP1B_HUMAN	MAP1B	Microtubule-associated protein 1B	1	DVMSDETNNEETESPSQEFVNITK	DVMSDETNNEETES(UniMod:21)PSQEFVNITK	3	DVMSDETNNEETES(UniMod:21)PSQEFVNITK3	2.64044e+06	3.51614e+06	2.93293e+06
A0A804HKE7;E7EVA0	P27816;A0A804HKE7;E7EVA0	A0A804HKE7_HUMAN;E7EVA0_HUMAN	MAP4	Microtubule-associated protein	1	DVTPPPETEVVLIK	DVT(UniMod:21)PPPETEVVLIK	2	DVT(UniMod:21)PPPETEVVLIK2	5.94754e+06	6.79451e+06	6.31949e+06
Q8NFC6	Q8NFC6	BD1L1_HUMAN	BOD1L1	Biorientation of chromosomes in cell division protein 1-like 1	1	DVTLSPVK	DVTLS(UniMod:21)PVK	2	DVTLS(UniMod:21)PVK2	285763	321399	307852
Q9P275	Q9P275;A0A075B784	UBP36_HUMAN	USP36	Ubiquitin carboxyl-terminal hydrolase 36	1	DVVLSTSPK	DVVLSTS(UniMod:21)PK	2	DVVLSTS(UniMod:21)PK2		67001.6	109630
Q15185	Q15185;A0A087WYT3;B4DDC6	TEBP_HUMAN	PTGES3	Prostaglandin E synthase 3	1	DWEDDSDEDMSNFDR	DWEDDS(UniMod:21)DEDMSNFDR	3	DWEDDS(UniMod:21)DEDMSNFDR3	129205	249233	359998
Q05519	Q05519;Q5T757;Q5T760	SRS11_HUMAN	SRSF11	Serine/arginine-rich splicing factor 11	1	DYDEEEQGYDSEK	DYDEEEQGYDS(UniMod:21)EK	2	DYDEEEQGYDS(UniMod:21)EK2	1.71842e+06	1.82549e+06	1.6705e+06
Q7Z417	Q7Z417	NUFP2_HUMAN	NUFIP2	Nuclear fragile X mental retardation-interacting protein 2	1	DYEIESQNPLASPTNTLLGSAK	DYEIESQNPLAS(UniMod:21)PTNTLLGSAK	3	DYEIESQNPLAS(UniMod:21)PTNTLLGSAK3	615570	581160	510863
P46087	P46087;F5GYR3;F5H5X6	NOP2_HUMAN	NOP2	Probable 28S rRNA (cytosine(4447)-C(5))-methyltransferase	1	EAAAGIQWSEEETEDEEEEK	EAAAGIQWS(UniMod:21)EEET(UniMod:21)EDEEEEK	3	EAAAGIQWS(UniMod:21)EEET(UniMod:21)EDEEEEK3	226355	427516	675454
P46087	P46087;F5GYR3;F5H5X6	NOP2_HUMAN	NOP2	Probable 28S rRNA (cytosine(4447)-C(5))-methyltransferase	1	EAAAGIQWSEEETEDEEEEKEVTPESGPPK	EAAAGIQWS(UniMod:21)EEET(UniMod:21)EDEEEEKEVT(UniMod:21)PESGPPK	3	EAAAGIQWS(UniMod:21)EEET(UniMod:21)EDEEEEKEVT(UniMod:21)PESGPPK3	201020	507945	186642
Q04637	Q04637;E7EX73;E9PGM1;E7EUU4;A0A7I2Y1C3	IF4G1_HUMAN	EIF4G1	Eukaryotic translation initiation factor 4 gamma 1	1	EAALPPVSPLK	EAALPPVS(UniMod:21)PLK	2	EAALPPVS(UniMod:21)PLK2	1.88176e+06	1.7577e+06	1.57478e+06
Q96EB6	Q96EB6	SIR1_HUMAN	SIRT1	NAD-dependent protein deacetylase sirtuin-1	1	EAASSPAGEPLR	EAASS(UniMod:21)PAGEPLR	2	EAASS(UniMod:21)PAGEPLR2	96681		103050
Q96C57	Q96C57;F5H8B7;G5EA44;F5H3K2;E7ENF1;F5H7W8	CSTOS_HUMAN	CUSTOS	Protein CUSTOS	0	EAAVSASDILQESAIHSPGTVEK	EAAVSASDILQESAIHS(UniMod:21)PGTVEK	3	EAAVSASDILQESAIHS(UniMod:21)PGTVEK3	967719	963392	1.0489e+06
Q9P2I0	Q9P2I0	CPSF2_HUMAN	CPSF2	Cleavage and polyadenylation specificity factor subunit 2	1	EADIDSSDESDIEEDIDQPSAHK	EADIDS(UniMod:21)S(UniMod:21)DES(UniMod:21)DIEEDIDQPSAHK	3	EADIDS(UniMod:21)S(UniMod:21)DES(UniMod:21)DIEEDIDQPSAHK3	5.53022e+06	6.05336e+06	4.82632e+06
Q96ST2	Q96ST2	IWS1_HUMAN	IWS1	Protein IWS1 homolog	1	EAEDSDSDDNIK	EAEDS(UniMod:21)DS(UniMod:21)DDNIK	2	EAEDS(UniMod:21)DS(UniMod:21)DDNIK2	4.00747e+06	4.71857e+06	3.66179e+06
Q96ST2	Q96ST2	IWS1_HUMAN	IWS1	Protein IWS1 homolog	1	EAEDSDSDDNIKR	EAEDS(UniMod:21)DS(UniMod:21)DDNIKR	2	EAEDS(UniMod:21)DS(UniMod:21)DDNIKR2	4.64429e+06	4.99103e+06	4.84974e+06
P55010	P55010	IF5_HUMAN	EIF5	Eukaryotic translation initiation factor 5	1	EAEEESSGGEEEDEDENIEVVYSK	EAEEES(UniMod:21)S(UniMod:21)GGEEEDEDENIEVVYSK	3	EAEEES(UniMod:21)S(UniMod:21)GGEEEDEDENIEVVYSK3	6.32989e+06	7.10881e+06	6.15403e+06
P07910	P07910;G3V2D6;G3V4C1;G3V2Q1	HNRPC_HUMAN	HNRNPC	Heterogeneous nuclear ribonucleoproteins C1/C2	1	EAEEGEDDRDSANGEDDS	EAEEGEDDRDS(UniMod:21)ANGEDDS	2	EAEEGEDDRDS(UniMod:21)ANGEDDS2	2.54262e+08	2.70947e+08	2.78138e+08
H0YKT8	H0YKT8	H0YKT8_HUMAN	PSMA4	Proteasome subunit beta (Fragment)	1	EAIGHAGTCLGILANDGVLLAAER	EAIGHAGT(UniMod:21)C(UniMod:4)LGILANDGVLLAAER	3	EAIGHAGT(UniMod:21)C(UniMod:4)LGILANDGVLLAAER3	195030	223183	252107
Q3KQU3	Q3KQU3;D3DPS3	MA7D1_HUMAN	MAP7D1	MAP7 domain-containing protein 1	1	EANANGSSPEPVK	EANANGSS(UniMod:21)PEPVK	2	EANANGSS(UniMod:21)PEPVK2	467777	489476	501266
Q86UU0	Q86UU0	BCL9L_HUMAN	BCL9L	B-cell CLL/lymphoma 9-like protein	1	EAPGSPPLSPR	EAPGS(UniMod:21)PPLS(UniMod:21)PR	2	EAPGS(UniMod:21)PPLS(UniMod:21)PR2	1.2367e+06	1.5428e+06	1.45574e+06
Q86UU0	Q86UU0	BCL9L_HUMAN	BCL9L	B-cell CLL/lymphoma 9-like protein	1	EAPGSPPLSPR	EAPGS(UniMod:21)PPLSPR	2	EAPGS(UniMod:21)PPLSPR2	568020	632660	613299
A9Z1X7	Q8IYB3;M0R088;A9Z1X7	A9Z1X7_HUMAN	SRRM1	Serine/arginine repetitive matrix protein 1	1	EARSPQPNK	EARS(UniMod:21)PQPNK	2	EARS(UniMod:21)PQPNK2	732220	909291	1.08982e+06
P17029	P17029;C9JRM9	ZKSC1_HUMAN	ZKSCAN1	Zinc finger protein with KRAB and SCAN domains 1	1	EATGLSPQAAQEK	EATGLS(UniMod:21)PQAAQEK	2	EATGLS(UniMod:21)PQAAQEK2	1.22009e+06	1.48044e+06	1.26803e+06
O75674	O75674;I3NI44;J3KQU4;I3L4I4	TM1L1_HUMAN	TOM1L1	TOM1-like protein 1	1	EATNTTSEPSAPSQDLLDLSPSPR	EATNTTSEPSAPSQDLLDLSPS(UniMod:21)PR	3	EATNTTSEPSAPSQDLLDLSPS(UniMod:21)PR3	1.58767e+06	1.92554e+06	1.52607e+06
O96019	O96019	ACL6A_HUMAN	ACTL6A	Actin-like protein 6A	1	EAVREGSPANWK	EAVREGS(UniMod:21)PANWK	2	EAVREGS(UniMod:21)PANWK2	1.51203e+06	1.33823e+06	1.27625e+06
O60884	O60884	DNJA2_HUMAN	DNAJA2	DnaJ homolog subfamily A member 2	1	EAYNDSSDEESSSHHGPGVQCAHQ	EAYNDS(UniMod:21)S(UniMod:21)DEESSSHHGPGVQC(UniMod:4)AHQ	3	EAYNDS(UniMod:21)S(UniMod:21)DEESSSHHGPGVQC(UniMod:4)AHQ3	1.2331e+06	1.1959e+06	1.23667e+06
Q8N556	Q8N556	AFAP1_HUMAN	AFAP1	Actin filament-associated protein 1	1	EAYSGCSGPVDSECPPPPSSPVHK	EAYSGC(UniMod:4)SGPVDSEC(UniMod:4)PPPPS(UniMod:21)SPVHK	3	EAYSGC(UniMod:4)SGPVDSEC(UniMod:4)PPPPS(UniMod:21)SPVHK3	3.16231e+06	3.28965e+06	3.27901e+06
Q8N556	Q8N556	AFAP1_HUMAN	AFAP1	Actin filament-associated protein 1	1	EAYSGCSGPVDSECPPPPSSPVHK	EAYSGC(UniMod:4)SGPVDSEC(UniMod:4)PPPPSS(UniMod:21)PVHK	3	EAYSGC(UniMod:4)SGPVDSEC(UniMod:4)PPPPSS(UniMod:21)PVHK3
Q7Z569	Q7Z569;J3KNN7	BRAP_HUMAN	BRAP	BRCA1-associated protein	1	ECINAAPDSPSK	EC(UniMod:4)INAAPDS(UniMod:21)PSK	2	EC(UniMod:4)INAAPDS(UniMod:21)PSK2	1.2679e+06	1.44679e+06	1.32132e+06
Q9C0C9	Q9C0C9;K7ES11	UBE2O_HUMAN	UBE2O	(E3-independent) E2 ubiquitin-conjugating enzyme	1	EDKPEGQSPVK	EDKPEGQS(UniMod:21)PVK	2	EDKPEGQS(UniMod:21)PVK2	654763	692010	634671
P54725	P54725;A0A494C0B4	RD23A_HUMAN	RAD23A	UV excision repair protein RAD23 homolog A	1	EDKSPSEESAPTTSPESVSGSVPSSGSSGR	EDKSPS(UniMod:21)EESAPTTSPESVSGSVPSSGSSGR	3	EDKSPS(UniMod:21)EESAPTTSPESVSGSVPSSGSSGR3	925521	950470	993725
Q9NQC3	Q9NQC3	RTN4_HUMAN	RTN4	Reticulon-4	1	EDLDQSPLVSSSDSPPRPQPAFK	EDLDQSPLVS(UniMod:21)S(UniMod:21)SDS(UniMod:21)PPRPQPAFK	3	EDLDQSPLVS(UniMod:21)S(UniMod:21)SDS(UniMod:21)PPRPQPAFK3	960935	951634	817448
P17706	P17706;K7EQG9;K7EIE9;D3DUJ3;K7ENP9;K7EIY0	PTN2_HUMAN	PTPN2	Tyrosine-protein phosphatase non-receptor type 2	1	EDLSPAFDHSPNK	EDLSPAFDHS(UniMod:21)PNK	2	EDLSPAFDHS(UniMod:21)PNK2	325091	515422	691393
Q14839	Q14839;A0A2R8Y5Z7;A0A2U3TZM0;A0A2R8Y8C1;F5GWX5;A0A2R8YFK9;A0A2R8Y8B3;A0A2R8Y445;A0A2R8YER1;A0A2R8Y425;A0A2R8Y5J0;A0A2R8YDJ9;A0A0C4DGG9;A0A2R8Y521;A0A2R8Y212;A0A2R8YFD8;A0A2R8Y685	CHD4_HUMAN	CHD4	Chromodomain-helicase-DNA-binding protein 4	1	EDNSEGEEILEEVGGDLEEEDDHHMEFCR	EDNS(UniMod:21)EGEEILEEVGGDLEEEDDHHMEFC(UniMod:4)R	3	EDNS(UniMod:21)EGEEILEEVGGDLEEEDDHHMEFC(UniMod:4)R3	4.48886e+06		7.19383e+06
Q12789	Q12789	TF3C1_HUMAN	GTF3C1	General transcription factor 3C polypeptide 1	1	EDPQARPLEGSSSEDSPPEGQAPPSHSPR	EDPQARPLEGSSSEDSPPEGQAPPS(UniMod:21)HSPR	3	EDPQARPLEGSSSEDSPPEGQAPPS(UniMod:21)HSPR3	549279	838893	1.14722e+06
Q5JSL3	Q5JSL3;A0A0J9YW64;A6NIW2	DOC11_HUMAN	DOCK11	Dedicator of cytokinesis protein 11	1	EDSRGSLIPEGATGFPDQGNTGENTR	EDS(UniMod:21)RGSLIPEGATGFPDQGNTGENTR	3	EDS(UniMod:21)RGSLIPEGATGFPDQGNTGENTR3	826625	1.14767e+06	1.03929e+06
Q99567	Q99567;J3KMX1	NUP88_HUMAN	NUP88	Nuclear pore complex protein Nup88	1	EDVEVAESPLR	EDVEVAES(UniMod:21)PLR	2	EDVEVAES(UniMod:21)PLR2	366645	432106	430962
O75643	O75643;A0A494C1A5	U520_HUMAN	SNRNP200	U5 small nuclear ribonucleoprotein 200 kDa helicase	1	EEASDDDMEGDEAVVR	EEAS(UniMod:21)DDDMEGDEAVVR	2	EEAS(UniMod:21)DDDMEGDEAVVR2	1.43411e+06	1.48206e+06	1.43771e+06
Q9H1E3	Q9H1E3	NUCKS_HUMAN	NUCKS1	Nuclear ubiquitous casein and cyclin-dependent kinase substrate 1	1	EEDEEPESPPEK	EEDEEPES(UniMod:21)PPEK	2	EEDEEPES(UniMod:21)PPEK2	2.66157e+07	2.7054e+07	2.99296e+07
Q9H1E3	Q9H1E3	NUCKS_HUMAN	NUCKS1	Nuclear ubiquitous casein and cyclin-dependent kinase substrate 1	1	EEDEEPESPPEKK	EEDEEPES(UniMod:21)PPEKK	2	EEDEEPES(UniMod:21)PPEKK2	1.55058e+06	1.72092e+06	1.80964e+06
P17096	P17096	HMGA1_HUMAN	HMGA1	High mobility group protein HMG-I/HMG-Y	1	EEEEGISQESSEEEQ	EEEEGISQES(UniMod:21)S(UniMod:21)EEEQ	2	EEEEGISQES(UniMod:21)S(UniMod:21)EEEQ2	6.83387e+07	8.3458e+07	7.56593e+07
P17096	P17096	HMGA1_HUMAN	HMGA1	High mobility group protein HMG-I/HMG-Y	1	EEEEGISQESSEEEQ	EEEEGISQES(UniMod:21)SEEEQ	2	EEEEGISQES(UniMod:21)SEEEQ2	3.03954e+06	3.58257e+06	3.87029e+06
Q9NRS6	Q9NRS6	SNX15_HUMAN	SNX15	Sorting nexin-15	1	EEGAAPSPTHVAELATMEVESAR	EEGAAPS(UniMod:21)PTHVAELATMEVESAR	3	EEGAAPS(UniMod:21)PTHVAELATMEVESAR3	425500	528661	439152
Q8NHQ9	Q8NHQ9;F5H5U2	DDX55_HUMAN	DDX55	ATP-dependent RNA helicase DDX55	1	EEGSDIEDEDMEELLNDTR	EEGS(UniMod:21)DIEDEDMEELLNDTR	3	EEGS(UniMod:21)DIEDEDMEELLNDTR3	101187	80072.1	25663.4
Q8N1G4	Q8N1G4	LRC47_HUMAN	LRRC47	Leucine-rich repeat-containing protein 47	1	EEGSLSDTEADAVSGQLPDPTTNPSAGK	EEGSLS(UniMod:21)DTEADAVSGQLPDPTTNPSAGK	3	EEGSLS(UniMod:21)DTEADAVSGQLPDPTTNPSAGK3	7.53893e+06	7.75354e+06	7.72448e+06
P26368	P26368	U2AF2_HUMAN	U2AF2	Splicing factor U2AF 65 kDa subunit	1	EEHGGLIRSPR	EEHGGLIRS(UniMod:21)PR	2	EEHGGLIRS(UniMod:21)PR2		4.40098e+06	3.42541e+06
P26368	P26368	U2AF2_HUMAN	U2AF2	Splicing factor U2AF 65 kDa subunit	1	EEHGGLIRSPR	EEHGGLIRS(UniMod:21)PR	3	EEHGGLIRS(UniMod:21)PR3	1.28535e+07	1.344e+07	1.37638e+07
Q99442	Q99442	SEC62_HUMAN	SEC62	Translocation protein SEC62	1	EELEQQTDGDCEEDEEEENDGETPK	EELEQQT(UniMod:21)DGDC(UniMod:4)EEDEEEENDGETPK	3	EELEQQT(UniMod:21)DGDC(UniMod:4)EEDEEEENDGETPK3	9.39244e+06	1.02606e+07	1.08162e+07
O00567	O00567	NOP56_HUMAN	NOP56	Nucleolar protein 56	1	EELMSSDLEETAGSTSIPK	EELMS(UniMod:21)S(UniMod:21)DLEETAGSTSIPK	3	EELMS(UniMod:21)S(UniMod:21)DLEETAGSTSIPK3	850448	656821	491066
O00567	O00567	NOP56_HUMAN	NOP56	Nucleolar protein 56	1	EELMSSDLEETAGSTSIPK	EELMSS(UniMod:21)DLEETAGSTSIPK	3	EELMSS(UniMod:21)DLEETAGSTSIPK3	3.35173e+06	4.79644e+06	4.46e+06
P41229	P41229;A0A8I5KXH7;A0A8I5KTT1;A0A8I5KYW1;A0A8I5KQR8;A0A8I5QL21;A0A8I5KPH7	KDM5C_HUMAN	KDM5C	Lysine-specific demethylase 5C	1	EELSHSPEPCTK	EELSHS(UniMod:21)PEPC(UniMod:4)TK	2	EELSHS(UniMod:21)PEPC(UniMod:4)TK2	220333	281696	174433
Q13309	Q13309;D6RHY6;A0A7I2V2J7;A0A7I2YQC7;A0A7I2V5B8;A0A7P0S4R7;D6R9R7;A0A7I2YQH6;A0A0A0MTL5;D6RAG5;A0A7I2V3U1;D6RF40	SKP2_HUMAN	SKP2	S-phase kinase-associated protein 2	1	EEPDSENIPQELLSNLGHPESPPR	EEPDSENIPQELLSNLGHPES(UniMod:21)PPR	3	EEPDSENIPQELLSNLGHPES(UniMod:21)PPR3	4.34584e+06	4.92747e+06	4.39577e+06
Q13309	Q13309;D6RHY6;A0A7I2V2J7;A0A7I2YQC7;A0A7I2V5B8;A0A7P0S4R7;D6R9R7;A0A7I2YQH6;A0A0A0MTL5;D6RAG5;A0A7I2V3U1;D6RF40	SKP2_HUMAN	SKP2	S-phase kinase-associated protein 2	1	EEPDSENIPQELLSNLGHPESPPRK	EEPDSENIPQELLSNLGHPES(UniMod:21)PPRK	3	EEPDSENIPQELLSNLGHPES(UniMod:21)PPRK3	2.27513e+06	2.6607e+06	2.68436e+06
Q9Y2X3	Q9Y2X3	NOP58_HUMAN	NOP58	Nucleolar protein 58	1	EEPLSEEEPCTSTAIASPEK	EEPLS(UniMod:21)EEEPC(UniMod:4)TSTAIASPEK	3	EEPLS(UniMod:21)EEEPC(UniMod:4)TSTAIASPEK3	198873	89656	40622
Q9NR30	Q9NR30;A0A8I5KND9;A0A8I5KYZ4;A0A8I5KNN2;A0A8I5KNP3	DDX21_HUMAN	DDX21	Nucleolar RNA helicase 2	1	EEPSQNDISPK	EEPSQNDIS(UniMod:21)PK	2	EEPSQNDIS(UniMod:21)PK2	1.1158e+06	1.14979e+06	1.61467e+06
Q7Z6Z7	Q7Z6Z7;H0Y659	HUWE1_HUMAN	HUWE1	E3 ubiquitin-protein ligase HUWE1	1	EESPMDVDQPSPSAQDTQSIASDGTPQGEK	EESPMDVDQPSPSAQDT(UniMod:21)QSIASDGTPQGEK	3	EESPMDVDQPSPSAQDT(UniMod:21)QSIASDGTPQGEK3	208907	404449	181198
Q5F1R6	Q5F1R6;A0A2R8Y534;A0A2R8Y4Q0;A0A2R8Y4N5	DJC21_HUMAN	DNAJC21	DnaJ homolog subfamily C member 21	1	EFGDGSDENEMEEHELK	EFGDGS(UniMod:21)DENEMEEHELK	3	EFGDGS(UniMod:21)DENEMEEHELK3
Q99733	Q99733;C9J6D1;C9JZI7;E9PS34;E9PKT8;E9PNJ7;A8MXH2	NP1L4_HUMAN	NAP1L4	Nucleosome assembly protein 1-like 4	1	EFITGDVEPTDAESEWHSENEEEEK	EFITGDVEPTDAESEWHS(UniMod:21)ENEEEEK	3	EFITGDVEPTDAESEWHS(UniMod:21)ENEEEEK3	6.79683e+07	7.22833e+07	7.63939e+07
Q09666	Q09666	AHNK_HUMAN	AHNAK	Neuroblast differentiation-associated protein AHNAK	1	EFSGPSTPTGTLEFEGGEVSLEGGK	EFS(UniMod:21)GPSTPTGTLEFEGGEVSLEGGK	3	EFS(UniMod:21)GPSTPTGTLEFEGGEVSLEGGK3	500692
Q09666	Q09666	AHNK_HUMAN	AHNAK	Neuroblast differentiation-associated protein AHNAK	1	EFSGPSTPTGTLEFEGGEVSLEGGK	EFSGPST(UniMod:21)PTGTLEFEGGEVSLEGGK	3	EFSGPST(UniMod:21)PTGTLEFEGGEVSLEGGK3		461129	602501
O00264	O00264	PGRC1_HUMAN	PGRMC1	Membrane-associated progesterone receptor component 1	1	EGEEPTVYSDEEEPK	EGEEPTVYS(UniMod:21)DEEEPK	2	EGEEPTVYS(UniMod:21)DEEEPK2	2.10066e+06	2.32663e+06	2.37289e+06
O00264	O00264	PGRC1_HUMAN	PGRMC1	Membrane-associated progesterone receptor component 1	1	EGEEPTVYSDEEEPKDESAR	EGEEPTVYS(UniMod:21)DEEEPKDESAR	2	EGEEPTVYS(UniMod:21)DEEEPKDESAR2	129256	146615	115377
P49321	P49321	NASP_HUMAN	NASP	Nuclear autoantigenic sperm protein	1	EGEETEGSEEDDK	EGEET(UniMod:21)EGS(UniMod:21)EEDDK	2	EGEET(UniMod:21)EGS(UniMod:21)EEDDK2	1.85903e+06	2.20071e+06	2.10941e+06
P49321	P49321	NASP_HUMAN	NASP	Nuclear autoantigenic sperm protein	1	EGEETEGSEEDDK	EGEETEGS(UniMod:21)EEDDK	2	EGEETEGS(UniMod:21)EEDDK2	220775	351526	350490
P78332	P78332;F8WCA5;E9PGM9	RBM6_HUMAN	RBM6	RNA-binding protein 6	1	EGETQGVAFEHESPADFQNSQSPVQDQDK	EGETQGVAFEHESPADFQNS(UniMod:21)QS(UniMod:21)PVQDQDK	3	EGETQGVAFEHESPADFQNS(UniMod:21)QS(UniMod:21)PVQDQDK3	1.0008e+06	1.24816e+06	1.19935e+06
P78332	P78332;F8WCA5;E9PGM9	RBM6_HUMAN	RBM6	RNA-binding protein 6	1	EGETQGVAFEHESPADFQNSQSPVQDQDK	EGETQGVAFEHESPADFQNSQS(UniMod:21)PVQDQDK	3	EGETQGVAFEHESPADFQNSQS(UniMod:21)PVQDQDK3	3.42004e+06	3.62127e+06	4.0261e+06
O00470	O00470;H0YNY8;U3KPR8;E9PDC4;F5GYS8	MEIS1_HUMAN	MEIS1	Homeobox protein Meis1	1	EGGSKSDSEDITR	EGGSKS(UniMod:21)DSEDITR	2	EGGSKS(UniMod:21)DSEDITR2	2.65394e+06	2.78759e+06	3.17354e+06
Q9UHB6	Q9UHB6;F8VS07;F8VQE1	LIMA1_HUMAN	LIMA1	LIM domain and actin-binding protein 1	1	EGHSLEMENENLVENGADSDEDDNSFLK	EGHSLEMENENLVENGADS(UniMod:21)DEDDNSFLK	3	EGHSLEMENENLVENGADS(UniMod:21)DEDDNSFLK3	2.18547e+07	2.53957e+07	2.27249e+07
P41743	P41743	KPCI_HUMAN	PRKCI	Protein kinase C iota type	1	EGLRPGDTTSTFCGTPNYIAPEILR	EGLRPGDTTST(UniMod:21)FC(UniMod:4)GTPNYIAPEILR	3	EGLRPGDTTST(UniMod:21)FC(UniMod:4)GTPNYIAPEILR3	1.85088e+06	2.01831e+06	2.00998e+06
Q08945	Q08945;A0A0U1RRK2	SSRP1_HUMAN	SSRP1	FACT complex subunit SSRP1	1	EGMNPSYDEYADSDEDQHDAYLER	EGMNPSYDEY(UniMod:21)ADS(UniMod:21)DEDQHDAYLER	3	EGMNPSYDEY(UniMod:21)ADS(UniMod:21)DEDQHDAYLER3	1.45536e+06	1.71776e+06	1.4115e+06
Q08945	Q08945;A0A0U1RRK2	SSRP1_HUMAN	SSRP1	FACT complex subunit SSRP1	1	EGMNPSYDEYADSDEDQHDAYLER	EGMNPSYDEYADS(UniMod:21)DEDQHDAYLER	3	EGMNPSYDEYADS(UniMod:21)DEDQHDAYLER3	1.67451e+07	1.26723e+07	1.3245e+07
Q4AC94	Q4AC94;A0A7P0Z475;A0A7P0T8V8;A0A7P0Z4H1;A0A7P0T883	C2CD3_HUMAN	C2CD3	C2 domain-containing protein 3	1	EGPSCPSPGPFCR	EGPSC(UniMod:4)PS(UniMod:21)PGPFC(UniMod:4)R	2	EGPSC(UniMod:4)PS(UniMod:21)PGPFC(UniMod:4)R2
O75351	O75351;K7EKZ3;K7EL71	VPS4B_HUMAN	VPS4B	Vacuolar protein sorting-associated protein 4B	1	EGQPSPADEK	EGQPS(UniMod:21)PADEK	2	EGQPS(UniMod:21)PADEK2	108874	314951	242243
Q08170	Q08170	SRSF4_HUMAN	SRSF4	Serine/arginine-rich splicing factor 4	1	EGRGESENAGTNQETR	EGRGES(UniMod:21)ENAGTNQETR	2	EGRGES(UniMod:21)ENAGTNQETR2	722533	767106	903282
P85037	P85037	FOXK1_HUMAN	FOXK1	Forkhead box protein K1	1	EGSPIPHDPEFGSK	EGS(UniMod:21)PIPHDPEFGSK	2	EGS(UniMod:21)PIPHDPEFGSK2	3.11665e+06	3.54145e+06	3.28017e+06
Q13098	Q13098;A0A096LPJ3;A0A096LP07;A8K070;C9JFE4;J3QQX0	CSN1_HUMAN	GPS1	COP9 signalosome complex subunit 1	1	EGSQGELTPANSQSR	EGS(UniMod:21)QGELTPANSQSR	2	EGS(UniMod:21)QGELTPANSQSR2	503634	426141	413665
Q9BVS4	Q9BVS4	RIOK2_HUMAN	RIOK2	Serine/threonine-protein kinase RIO2	1	EGSEFSFSDGEVAEK	EGSEFSFS(UniMod:21)DGEVAEK	2	EGSEFSFS(UniMod:21)DGEVAEK2	693785	816992	675600
Q13098	Q13098;A0A096LPJ3;A0A096LP07;A8K070;C9JFE4;J3QQX0	CSN1_HUMAN	GPS1	COP9 signalosome complex subunit 1	1	EGSQGELTPANSQSR	EGSQGELT(UniMod:21)PANSQSR	2	EGSQGELT(UniMod:21)PANSQSR2	405298	439632	416951
Q15651	Q15651;A0A087WZE9	HMGN3_HUMAN	HMGN3	High mobility group nucleosome-binding domain-containing protein 3	1	EGTAPSENGETK	EGTAPS(UniMod:21)ENGETK	2	EGTAPS(UniMod:21)ENGETK2	1.25754e+06	1.34531e+06	1.17547e+06
Q16643	Q16643	DREB_HUMAN	DBN1	Drebrin	1	EGTQASEGYFSQSQEEEFAQSEELCAK	EGTQASEGYFS(UniMod:21)QSQEEEFAQSEELC(UniMod:4)AK	3	EGTQASEGYFS(UniMod:21)QSQEEEFAQSEELC(UniMod:4)AK3	835022	875198	1.03362e+06
Q27J81	Q27J81;A0A0A0MQU1;A0A6Q8PGU8;A0A6Q8PH71;A0A6Q8PH52;A0A6Q8PGY8;A0A6Q8PGN3;A0A6Q8PGC7;A0A6Q8PF29;A0A6Q8PH59;A0A6Q8PHG2;A0A6Q8PHA2;A0A6Q8PFB9;A0A6Q8PFN5;A0A6Q8PF44;A0A6Q8PH63;A0A087X118;A0A6Q8PH25	INF2_HUMAN	INF2	Inverted formin-2	1	EHNSMWASLSSPDAEAVEPDFSSIER	EHNSMWASLSS(UniMod:21)PDAEAVEPDFSSIER	3	EHNSMWASLSS(UniMod:21)PDAEAVEPDFSSIER3	889726	984723	927965
Q9H307	Q9H307	PININ_HUMAN	PNN	Pinin	1	EIAIVHSDAEK	EIAIVHS(UniMod:21)DAEK	2	EIAIVHS(UniMod:21)DAEK2	1.6227e+07	1.74284e+07	1.71854e+07
Q13523	Q13523	PRP4B_HUMAN	PRPF4B	Serine/threonine-protein kinase PRP4 homolog	1	EIIDASDKEGMSPAK	EIIDAS(UniMod:21)DKEGMS(UniMod:21)PAK	2	EIIDAS(UniMod:21)DKEGMS(UniMod:21)PAK2	269950	320401	347122
Q8IWA0	Q8IWA0	WDR75_HUMAN	WDR75	WD repeat-containing protein 75	1	EIPEDVDMEEEKESEDSDEENDFTEK	EIPEDVDMEEEKES(UniMod:21)EDS(UniMod:21)DEENDFTEK	3	EIPEDVDMEEEKES(UniMod:21)EDS(UniMod:21)DEENDFTEK3	8.30951e+06	9.32083e+06	8.67771e+06
Q9BQG0	Q9BQG0;I3L1L3	MBB1A_HUMAN	MYBBP1A	Myb-binding protein 1A	1	EIPSATQSPISK	EIPSATQS(UniMod:21)PISK	2	EIPSATQS(UniMod:21)PISK2	4.39131e+06	4.82728e+06	5.10813e+06
Q86UP2	Q86UP2	KTN1_HUMAN	KTN1	Kinectin	1	EIQNGNLHESDSESVPRDFK	EIQNGNLHESDS(UniMod:21)ES(UniMod:21)VPRDFK	3	EIQNGNLHESDS(UniMod:21)ES(UniMod:21)VPRDFK3		2.10351e+06	2.13499e+06
P08238	P08238;Q58FF7	HS90B_HUMAN	HSP90AB1	Heat shock protein HSP 90-beta	0	EISDDEAEEEK	EIS(UniMod:21)DDEAEEEK	2	EIS(UniMod:21)DDEAEEEK2	8.29627e+08	8.76773e+08	8.83721e+08
P08238	P08238;Q58FF7	HS90B_HUMAN	HSP90AB1	Heat shock protein HSP 90-beta	0	EISDDEAEEEKGEK	EIS(UniMod:21)DDEAEEEKGEK	2	EIS(UniMod:21)DDEAEEEKGEK2	3.85557e+06	4.0072e+06	4.22566e+06
Q9UQ35	Q9UQ35;I3L4D8;I3L182	SRRM2_HUMAN	SRRM2	Serine/arginine repetitive matrix protein 2	1	EISSSPTSK	EISSS(UniMod:21)PTSK	2	EISSS(UniMod:21)PTSK2	146366	250967	186175
P23511	P23511	NFYA_HUMAN	NFYA	Nuclear transcription factor Y subunit alpha	1	EKDSPHMQDPNQADEEAMTQIIR	EKDS(UniMod:21)PHMQDPNQADEEAMTQIIR	3	EKDS(UniMod:21)PHMQDPNQADEEAMTQIIR3	194636	436877	400152
Q96C57	Q96C57;F5H8B7;G5EA44;F5H3K2;E7ENF1;F5H7W8	CSTOS_HUMAN	CUSTOS	Protein CUSTOS	0	EKEESPQPR	EKEES(UniMod:21)PQPR	2	EKEES(UniMod:21)PQPR2	1.73635e+06	1.94199e+06	2.23866e+06
P08238	P08238	HS90B_HUMAN	HSP90AB1	Heat shock protein HSP 90-beta	1	EKEISDDEAEEEK	EKEIS(UniMod:21)DDEAEEEK	2	EKEIS(UniMod:21)DDEAEEEK2	8.55912e+07	8.6809e+07	8.41588e+07
P30419	P30419;A0A7I2V3M5;A0A7I2V3X4;A0A7I2V4Y5;K7EN42;A0A7I2V3U5;A0A7I2V539;B7Z8J4	NMT1_HUMAN	NMT1	Glycylpeptide N-tetradecanoyltransferase 1	1	EKGSETDSAQDQPVK	EKGS(UniMod:21)ETDSAQDQPVK	2	EKGS(UniMod:21)ETDSAQDQPVK2		255879	244732
Q9H3H1	Q9H3H1;Q3T7B4	MOD5_HUMAN	TRIT1	tRNA dimethylallyltransferase	1	EKGSPGQNDQELK	EKGS(UniMod:21)PGQNDQELK	2	EKGS(UniMod:21)PGQNDQELK2	130011	269607	504476
Q86V48	Q86V48	LUZP1_HUMAN	LUZP1	Leucine zipper protein 1	1	EKPDSDDDLDIASLVTAK	EKPDS(UniMod:21)DDDLDIASLVTAK	3	EKPDS(UniMod:21)DDDLDIASLVTAK3	442745	546095	268351
Q9H4A3	Q9H4A3;A0A6Q8PFM0;F5GWT4	WNK1_HUMAN	WNK1	Serine/threonine-protein kinase WNK1	1	EKPELSEPSHLNGPSSDPEAAFLSR	EKPELSEPSHLNGPSS(UniMod:21)DPEAAFLSR	3	EKPELSEPSHLNGPSS(UniMod:21)DPEAAFLSR3	1.14407e+07	1.20629e+07	1.33191e+07
O76021	O76021	RL1D1_HUMAN	RSL1D1	Ribosomal L1 domain-containing protein 1	1	EKSPSLGK	EKS(UniMod:21)PSLGK	2	EKS(UniMod:21)PSLGK2	859202	1.10374e+06	1.08156e+06
Q9BRJ6	Q9BRJ6;C9JQV0;H7C0T1;H7C2R9	CG050_HUMAN	C7orf50	Uncharacterized protein C7orf50	1	ELDEEGSDPPLPGR	ELDEEGS(UniMod:21)DPPLPGR	2	ELDEEGS(UniMod:21)DPPLPGR2	421006	430192	454704
O15541	O15541	R113A_HUMAN	RNF113A	E3 ubiquitin-protein ligase RNF113A	1	ELDEGRYGVYEDENYEVGSDDEEIPFK	ELDEGRYGVYEDENYEVGS(UniMod:21)DDEEIPFK	3	ELDEGRYGVYEDENYEVGS(UniMod:21)DDEEIPFK3	746573	707203	804444
Q9NRL2	Q9NRL2;A0A087WWN7	BAZ1A_HUMAN	BAZ1A	Bromodomain adjacent to zinc finger domain protein 1A	1	ELDQDMVTEDEDDPGSHKR	ELDQDMVT(UniMod:21)EDEDDPGSHKR	3	ELDQDMVT(UniMod:21)EDEDDPGSHKR3	683245	701752	690752
Q13188	Q13188;A0A087WZ06;E5RFQ9	STK3_HUMAN	STK3	Serine/threonine-protein kinase 3	1	ELEEEEENSDEDELDSHTMVK	ELEEEEENS(UniMod:21)DEDELDSHTMVK	3	ELEEEEENS(UniMod:21)DEDELDSHTMVK3	678827	707211	661102
Q9HAS0	Q9HAS0;J3QKQ1;J3KRR1;J9JIC5	NJMU_HUMAN	C17orf75	Protein Njmu-R1	1	ELESSEEGGSAEER	ELES(UniMod:21)SEEGGSAEER	2	ELES(UniMod:21)SEEGGSAEER2	880532	945722	896049
Q9UKV3	Q9UKV3;E7EQT4;S4R3H4	ACINU_HUMAN	ACIN1	Apoptotic chromatin condensation inducer in the nucleus	1	ELLVSQHTVQLVGGLSPLSSPSDTK	ELLVSQHTVQLVGGLS(UniMod:21)PLSSPSDTK	3	ELLVSQHTVQLVGGLS(UniMod:21)PLSSPSDTK3	425971	503827	481537
A0A0C4DFV9	A0A0C4DFV9	A0A0C4DFV9_HUMAN	SET	Protein SET	1	ELNSNHDGADETSEK	ELNSNHDGADETS(UniMod:21)EK	2	ELNSNHDGADETS(UniMod:21)EK2	2.38839e+07	2.59947e+07	2.77303e+07
Q99543	Q99543;H7C3L7;F2Z3H0;F2Z3N9	DNJC2_HUMAN	DNAJC2	DnaJ homolog subfamily C member 2	1	ELSEESEDEELQLEEFPMLK	ELS(UniMod:21)EES(UniMod:21)EDEELQLEEFPMLK	3	ELS(UniMod:21)EES(UniMod:21)EDEELQLEEFPMLK3	562097	678401	808291
Q9UQ35	Q9UQ35	SRRM2_HUMAN	SRRM2	Serine/arginine repetitive matrix protein 2	1	ELSNSPLRENSFGSPLEFR	ELS(UniMod:21)NS(UniMod:21)PLRENSFGSPLEFR	3	ELS(UniMod:21)NS(UniMod:21)PLRENSFGSPLEFR3	110499	73553.9	103830
O95453	O95453;A0A494C0W0;A0A494C0Q6;A0A494C0K5	PARN_HUMAN	PARN	Poly(A)-specific ribonuclease PARN	1	ELSPAGSISK	ELS(UniMod:21)PAGSISK	2	ELS(UniMod:21)PAGSISK2	1.98851e+06	2.13071e+06	2.0238e+06
Q7Z4S6	Q7Z4S6;A0A1B0GV47;H0YIM6;H0YHT2;H0YI78	KI21A_HUMAN	KIF21A	Kinesin-like protein KIF21A	1	ELSPPPGLPSK	ELS(UniMod:21)PPPGLPSK	2	ELS(UniMod:21)PPPGLPSK2	265706	346516	254937
Q5JSH3	Q5JSH3	WDR44_HUMAN	WDR44	WD repeat-containing protein 44	1	ELSDQATASPIVAR	ELSDQATAS(UniMod:21)PIVAR	2	ELSDQATAS(UniMod:21)PIVAR2	623719	690626	701265
O95628	O95628	CNOT4_HUMAN	CNOT4	CCR4-NOT transcription complex subunit 4	1	ELSVQDQPSLSPTSLQNSSSHTTTAK	ELSVQDQPS(UniMod:21)LSPTSLQNSSSHTTTAK	3	ELSVQDQPS(UniMod:21)LSPTSLQNSSSHTTTAK3	1.23746e+06	1.15437e+06	1.52775e+06
P0DJ93	P0DJ93	SIM13_HUMAN	SMIM13	Small integral membrane protein 13	1	ELVGDTGSQEGDHEPSGSETEEDTSSSPHR	ELVGDT(UniMod:21)GSQEGDHEPS(UniMod:21)GSETEEDTSSSPHR	3	ELVGDT(UniMod:21)GSQEGDHEPS(UniMod:21)GSETEEDTSSSPHR3	399036	397375	714133
P49792	P49792	RBP2_HUMAN	RANBP2	E3 SUMO-protein ligase RanBP2	1	ELVGPPLAETVFTPKTSPENVQDR	ELVGPPLAET(UniMod:21)VFTPKTS(UniMod:21)PENVQDR	3	ELVGPPLAET(UniMod:21)VFTPKTS(UniMod:21)PENVQDR3	3.77917e+06	3.76311e+06	3.06033e+06
Q12802	Q12802;H0YMW2	AKP13_HUMAN	AKAP13	A-kinase anchor protein 13	1	ELVPDQAVISDSTFSLANSPGSESVTK	ELVPDQAVIS(UniMod:21)DSTFSLANSPGSESVTK	3	ELVPDQAVIS(UniMod:21)DSTFSLANSPGSESVTK3	482755
P18583	P18583;H7C1M2	SON_HUMAN	SON	Protein SON	1	EMEHNTVCAAGTSPVGEIGEEK	EMEHNTVC(UniMod:4)AAGTS(UniMod:21)PVGEIGEEK	3	EMEHNTVC(UniMod:4)AAGTS(UniMod:21)PVGEIGEEK3	2.28008e+06	3.1277e+06	3.2768e+06
Q8N3X1	Q8N3X1	FNBP4_HUMAN	FNBP4	Formin-binding protein 4	1	EMEVEESPEK	EMEVEES(UniMod:21)PEK	2	EMEVEES(UniMod:21)PEK2	502874	558290	523266
Q9H1E3	Q9H1E3	NUCKS_HUMAN	NUCKS1	Nuclear ubiquitous casein and cyclin-dependent kinase substrate 1	1	EMLMEDVGSEEEQEEEDEAPFQEK	EMLMEDVGS(UniMod:21)EEEQEEEDEAPFQEK	3	EMLMEDVGS(UniMod:21)EEEQEEEDEAPFQEK3	1.41408e+07	1.43747e+07	1.1652e+07
P28715	P28715;A0A1W2PS85;R4GMW8;A0A494C0S2	ERCC5_HUMAN	ERCC5	DNA excision repair protein ERCC-5	0	ENDLYVLPPLQEEEKHSSEEEDEK	ENDLYVLPPLQEEEKHS(UniMod:21)S(UniMod:21)EEEDEK	3	ENDLYVLPPLQEEEKHS(UniMod:21)S(UniMod:21)EEEDEK3	3.29846e+06	3.27422e+06	3.32696e+06
P78362	P78362	SRPK2_HUMAN	SRPK2	SRSF protein kinase 2	1	ENIEKDEDDVDQELANIDPTWIESPK	ENIEKDEDDVDQELANIDPTWIES(UniMod:21)PK	3	ENIEKDEDDVDQELANIDPTWIES(UniMod:21)PK3	301544	216618	177506
Q9H467	Q9H467	CUED2_HUMAN	CUEDC2	CUE domain-containing protein 2	1	ENLQPQSSGVQGQVPISPEPLQRPEMLK	ENLQPQSSGVQGQVPIS(UniMod:21)PEPLQRPEMLK	3	ENLQPQSSGVQGQVPIS(UniMod:21)PEPLQRPEMLK3		607911	476373
Q8TCJ2	Q8TCJ2	STT3B_HUMAN	STT3B	Dolichyl-diphosphooligosaccharide--protein glycosyltransferase subunit STT3B	1	ENPPVEDSSDEDDK	ENPPVEDS(UniMod:21)S(UniMod:21)DEDDK	2	ENPPVEDS(UniMod:21)S(UniMod:21)DEDDK2	1.1514e+07	1.30055e+07	1.2571e+07
Q8TCJ2	Q8TCJ2	STT3B_HUMAN	STT3B	Dolichyl-diphosphooligosaccharide--protein glycosyltransferase subunit STT3B	1	ENPPVEDSSDEDDK	ENPPVEDS(UniMod:21)SDEDDK	2	ENPPVEDS(UniMod:21)SDEDDK2	8.0393e+06	8.86452e+06	7.43854e+06
P25445	P25445;Q59FU8	TNR6_HUMAN	FAS	Tumor necrosis factor receptor superfamily member 6	1	ENQGSHESPTLNPETVAINLSDVDLSK	ENQGSHES(UniMod:21)PTLNPETVAINLSDVDLSK	3	ENQGSHES(UniMod:21)PTLNPETVAINLSDVDLSK3	173061	295380	186593
Q13427	Q13427;A0A7I2V629;E9PG73;C9JM79;A0A7I2V4F2;A0A7I2V5Q5	PPIG_HUMAN	PPIG	Peptidyl-prolyl cis-trans isomerase G	1	ENQRSPVR	ENQRS(UniMod:21)PVR	2	ENQRS(UniMod:21)PVR2	640921	893092	761958
Q92917	Q92917	GPKOW_HUMAN	GPKOW	G-patch domain and KOW motifs-containing protein	1	ENQVVELHYDAICQYMGPSDTDDD	ENQVVELHYDAIC(UniMod:4)QYMGPS(UniMod:21)DTDDD	3	ENQVVELHYDAIC(UniMod:4)QYMGPS(UniMod:21)DTDDD3	1.02614e+06	1.38531e+06	1.4084e+06
Q4G0J3	Q4G0J3;A0A8I5KSZ3;A0A8I5KUI4;A0A8I5KYN2	LARP7_HUMAN	LARP7	La-related protein 7	1	ENRDIEISTEEEK	ENRDIEIS(UniMod:21)T(UniMod:21)EEEK	2	ENRDIEIS(UniMod:21)T(UniMod:21)EEEK2	1.2654e+06	1.73055e+06	1.81596e+06
P15151	P15151;A0A0C4DG49	PVR_HUMAN	PVR	Poliovirus receptor	1	ENSSSQDPQTEGTR	ENS(UniMod:21)SSQDPQTEGTR	2	ENS(UniMod:21)SSQDPQTEGTR2	588334	693019	669699
Q9UQ35	Q9UQ35	SRRM2_HUMAN	SRRM2	Serine/arginine repetitive matrix protein 2	1	ENSFGSPLEFR	ENSFGS(UniMod:21)PLEFR	2	ENSFGS(UniMod:21)PLEFR2	917688	936873	866890
O75909	O75909;G3V5E1;G3V235;G3V2Q3	CCNK_HUMAN	CCNK	Cyclin-K	1	ENSSPSVTSANLDHTK	ENSS(UniMod:21)PSVTSANLDHTK	3	ENSS(UniMod:21)PSVTSANLDHTK3	36624.2
Q9Y2U8	Q9Y2U8	MAN1_HUMAN	LEMD3	Inner nuclear membrane protein Man1	1	ENYSDSEEEDDDDVASSR	ENYS(UniMod:21)DS(UniMod:21)EEEDDDDVASSR	3	ENYS(UniMod:21)DS(UniMod:21)EEEDDDDVASSR3		16524.7	39649.9
P23193	P23193;A0A1W2PRL9;E5RIS7;A0A1W2PPZ5	TCEA1_HUMAN	TCEA1	Transcription elongation factor A protein 1	1	EPAITSQNSPEAR	EPAITSQNS(UniMod:21)PEAR	2	EPAITSQNS(UniMod:21)PEAR2	6.91029e+06	7.31764e+06	7.27568e+06
Q9GZV5	Q9GZV5;C9JQS8;C9JR84;C9J038	WWTR1_HUMAN	WWTR1	WW domain-containing transcription regulator protein 1	1	EPDSGSHSRQSSTDSSGGHPGPR	EPDSGSHSRQS(UniMod:21)ST(UniMod:21)DSS(UniMod:21)GGHPGPR	3	EPDSGSHSRQS(UniMod:21)ST(UniMod:21)DSS(UniMod:21)GGHPGPR3	405705
P58012	P58012	FOXL2_HUMAN	FOXL2	Forkhead box protein L2	1	EPEGPPPSPGK	EPEGPPPS(UniMod:21)PGK	2	EPEGPPPS(UniMod:21)PGK2	144920	191291
P35659	P35659;H0Y8X0;A0A494C198;A0A494C028;B4DFG0;H0Y993;D6R9L5	DEK_HUMAN	DEK	Protein DEK	1	EPEMPGPREESEEEEDEDDEEEEEEEK	EPEMPGPREES(UniMod:21)EEEEDEDDEEEEEEEK	3	EPEMPGPREES(UniMod:21)EEEEDEDDEEEEEEEK3	5.47866e+07	5.36059e+07	5.45677e+07
Q9H2Y7	Q9H2Y7;A0A0C4DGM5;H3BSS6;H3BS99	ZN106_HUMAN	ZNF106	Zinc finger protein 106	1	EPHSPADQPEQQAESTLTSAETR	EPHS(UniMod:21)PADQPEQQAESTLTSAETR	3	EPHS(UniMod:21)PADQPEQQAESTLTSAETR3	1.1086e+06	1.10361e+06	1.06235e+06
Q8WUM4	Q8WUM4	PDC6I_HUMAN	PDCD6IP	Programmed cell death 6-interacting protein	1	EPSAPSIPTPAYQSSPAGGHAPTPPTPAPR	EPSAPSIPTPAYQSS(UniMod:21)PAGGHAPTPPTPAPR	3	EPSAPSIPTPAYQSS(UniMod:21)PAGGHAPTPPTPAPR3		228931
A0FGR8	A0FGR8;A0A499FIX8;H7BXI1	ESYT2_HUMAN	ESYT2	Extended synaptotagmin-2	1	EPTPSIASDISLPIATQELR	EPTPSIAS(UniMod:21)DIS(UniMod:21)LPIATQELR	3	EPTPSIAS(UniMod:21)DIS(UniMod:21)LPIATQELR3	647750	489388	268969
Q8NEL9	Q8NEL9;A0A669KB51;A0A087X0H7;A0A669KAW5;A0A6E1W401	DDHD1_HUMAN	DDHD1	Phospholipase DDHD1	1	EPTSVSENEGISTIPSPVTSPVLSR	EPTSVSENEGISTIPS(UniMod:21)PVTS(UniMod:21)PVLSR	3	EPTSVSENEGISTIPS(UniMod:21)PVTS(UniMod:21)PVLSR3	563533	675513	496755
P54105	P54105;E9PJF4	ICLN_HUMAN	CLNS1A	Methylosome subunit pICln	1	EPVADEEEEDSDDDVEPITEFR	EPVADEEEEDS(UniMod:21)DDDVEPITEFR	3	EPVADEEEEDS(UniMod:21)DDDVEPITEFR3	2.75617e+06	3.50097e+06	2.98618e+06
Q7Z333	Q7Z333	SETX_HUMAN	SETX	Probable helicase senataxin	1	EQAPDISPK	EQAPDIS(UniMod:21)PK	2	EQAPDIS(UniMod:21)PK2	712786	674787	780612
P42167	P42166;P42167;G5E972;H0YJH7	LAP2B_HUMAN	TMPO	Lamina-associated polypeptide 2, isoforms beta/gamma	1	EQGTESRSSTPLPTISSSAENTR	EQGTES(UniMod:21)RSS(UniMod:21)TPLPTISSSAENTR	3	EQGTES(UniMod:21)RSS(UniMod:21)TPLPTISSSAENTR3	3.47237e+06		4.15893e+06
P42167	P42166;P42167;G5E972;H0YJH7	LAP2B_HUMAN	TMPO	Lamina-associated polypeptide 2, isoforms beta/gamma	1	EQGTESRSSTPLPTISSSAENTR	EQGTESRSS(UniMod:21)T(UniMod:21)PLPTISSSAENTR	3	EQGTESRSS(UniMod:21)T(UniMod:21)PLPTISSSAENTR3		4.64757e+06
Q13107	Q13107;H7C189	UBP4_HUMAN	USP4	Ubiquitin carboxyl-terminal hydrolase 4	1	EQLSETEGSGEDEPGNDPSETTQK	EQLS(UniMod:21)ET(UniMod:21)EGSGEDEPGNDPSETTQK	3	EQLS(UniMod:21)ET(UniMod:21)EGSGEDEPGNDPSETTQK3		1.49343e+06
Q13107	Q13107;H7C189	UBP4_HUMAN	USP4	Ubiquitin carboxyl-terminal hydrolase 4	1	EQLSETEGSGEDEPGNDPSETTQK	EQLS(UniMod:21)ETEGS(UniMod:21)GEDEPGNDPSETTQK	3	EQLS(UniMod:21)ETEGS(UniMod:21)GEDEPGNDPSETTQK3	1.02721e+06		1.06691e+06
Q13107	Q13107;H7C189	UBP4_HUMAN	USP4	Ubiquitin carboxyl-terminal hydrolase 4	1	EQLSETEGSGEDEPGNDPSETTQKK	EQLSET(UniMod:21)EGS(UniMod:21)GEDEPGNDPSETTQKK	3	EQLSET(UniMod:21)EGS(UniMod:21)GEDEPGNDPSETTQKK3	1.08149e+06	1.17938e+06	1.26869e+06
Q13107	Q13107;H7C189	UBP4_HUMAN	USP4	Ubiquitin carboxyl-terminal hydrolase 4	1	EQLSETEGSGEDEPGNDPSETTQKK	EQLSETEGS(UniMod:21)GEDEPGNDPSETTQKK	3	EQLSETEGS(UniMod:21)GEDEPGNDPSETTQKK3	271899	176238	163441
Q9UQ35	Q9UQ35	SRRM2_HUMAN	SRRM2	Serine/arginine repetitive matrix protein 2	1	EQNSALPTSSQDEELMEVVEK	EQNSALPTS(UniMod:21)SQDEELMEVVEK	3	EQNSALPTS(UniMod:21)SQDEELMEVVEK3	448393	480874	354505
Q13523	Q13523	PRP4B_HUMAN	PRPF4B	Serine/threonine-protein kinase PRP4 homolog	1	EQPEMEDANSEK	EQPEMEDANS(UniMod:21)EK	2	EQPEMEDANS(UniMod:21)EK2	3.73701e+06	3.84291e+06	3.14519e+06
Q13523	Q13523	PRP4B_HUMAN	PRPF4B	Serine/threonine-protein kinase PRP4 homolog	1	EQPEMEDANSEKSINEENGEVSEDQSQNK	EQPEMEDANS(UniMod:21)EKS(UniMod:21)INEENGEVSEDQSQNK	3	EQPEMEDANS(UniMod:21)EKS(UniMod:21)INEENGEVSEDQSQNK3	889687	1.45507e+06	1.48205e+06
P55209	P55209;F8W0J6;F8VVB5;H0YIV4;F8W020;F5H4R6;F8VXI6;F8VY35;F8VUX1	NP1L1_HUMAN	NAP1L1	Nucleosome assembly protein 1-like 1	1	EQSELDQDLDDVEEVEEEETGEETK	EQS(UniMod:21)ELDQDLDDVEEVEEEETGEETK	3	EQS(UniMod:21)ELDQDLDDVEEVEEEETGEETK3		206713
Q92615	Q92615;A0A8I5KWN8;A0A8I5KVU2;H0Y4V9	LAR4B_HUMAN	LARP4B	La-related protein 4B	1	EQSTPPKSPQ	EQSTPPKS(UniMod:21)PQ	2	EQSTPPKS(UniMod:21)PQ2	581673
Q71RC2	Q71RC2;X6RLN4	LARP4_HUMAN	LARP4	La-related protein 4	1	EQYVPPRSPK	EQYVPPRS(UniMod:21)PK	2	EQYVPPRS(UniMod:21)PK2	2.06467e+06	2.32047e+06	2.33714e+06
Q96T88	Q96T88;A0A087WTW0;A0A087WVR3	UHRF1_HUMAN	UHRF1	E3 ubiquitin-protein ligase UHRF1	1	ERDSELSDTDSGCCLGQSESDK	ERDSELS(UniMod:21)DTDSGC(UniMod:4)C(UniMod:4)LGQSESDK	3	ERDSELS(UniMod:21)DTDSGC(UniMod:4)C(UniMod:4)LGQSESDK3	891410	940078	839004
Q96GY3	Q96GY3	LIN37_HUMAN	LIN37	Protein lin-37 homolog	1	ERECSPSSPLPPLPEDEEGSEVTNSK	EREC(UniMod:4)SPS(UniMod:21)S(UniMod:21)PLPPLPEDEEGSEVTNSK	3	EREC(UniMod:4)SPS(UniMod:21)S(UniMod:21)PLPPLPEDEEGSEVTNSK3	1.62288e+06	2.08956e+06	2.11819e+06
Q96GY3	Q96GY3	LIN37_HUMAN	LIN37	Protein lin-37 homolog	1	ERECSPSSPLPPLPEDEEGSEVTNSK	EREC(UniMod:4)SPSS(UniMod:21)PLPPLPEDEEGSEVTNSK	3	EREC(UniMod:4)SPSS(UniMod:21)PLPPLPEDEEGSEVTNSK3	778936	832503	849626
Q9UKL0	Q9UKL0	RCOR1_HUMAN	RCOR1	REST corepressor 1	1	EREESEDELEEANGNNPIDIEVDQNK	EREES(UniMod:21)EDELEEANGNNPIDIEVDQNK	3	EREES(UniMod:21)EDELEEANGNNPIDIEVDQNK3	7.10755e+06	7.58195e+06	8.12905e+06
Q53GS9	Q53GS9;B9A018;F8WC91	SNUT2_HUMAN	USP39	U4/U6.U5 tri-snRNP-associated protein 2	1	EREVDEDSEPER	EREVDEDS(UniMod:21)EPER	2	EREVDEDS(UniMod:21)EPER2	551319	472596	1.00997e+06
O60271	O60271;D6RHI8	JIP4_HUMAN	SPAG9	C-Jun-amino-terminal kinase-interacting protein 4	1	ERPISLGIFPLPAGDGLLTPDAQK	ERPISLGIFPLPAGDGLLT(UniMod:21)PDAQK	3	ERPISLGIFPLPAGDGLLT(UniMod:21)PDAQK3	351970	555436	387261
P07814	P07814;V9GYZ6	SYEP_HUMAN	EPRS1	Bifunctional glutamate/proline--tRNA ligase	1	ERPTPSLNNNCTTSEDSLVLYNR	ERPTPSLNNNC(UniMod:4)TTS(UniMod:21)EDSLVLYNR	3	ERPTPSLNNNC(UniMod:4)TTS(UniMod:21)EDSLVLYNR3	1.24641e+06	1.33029e+06	1.46409e+06
A0A0A0MS29;H7C433	Q9GZY8;H7C433;C9JHF5;A0A0A0MS29	A0A0A0MS29_HUMAN;H7C433_HUMAN	MFF	Mitochondrial fission factor	1	ERSMSENAVR	ERS(UniMod:21)MS(UniMod:21)ENAVR	2	ERS(UniMod:21)MS(UniMod:21)ENAVR2	1.57948e+06	1.6412e+06	1.50442e+06
Q9Y2V2	Q9Y2V2;H3BPY5;H3BTK3;H3BSW7;I3L3X8;H3BUY4;H3BNU9	CHSP1_HUMAN	CARHSP1	Calcium-regulated heat-stable protein 1	1	ERSPSPLR	ERS(UniMod:21)PS(UniMod:21)PLR	2	ERS(UniMod:21)PS(UniMod:21)PLR2	8.88894e+06	1.08157e+07	9.26086e+06
Q14687	Q14687;H7C3B5;H0Y613	GSE1_HUMAN	GSE1	Genetic suppressor element 1	1	ERSPSPPTIQSK	ERS(UniMod:21)PS(UniMod:21)PPTIQSK	2	ERS(UniMod:21)PS(UniMod:21)PPTIQSK2	1.79006e+06	1.56895e+06	1.62844e+06
P49585	P49585;C9JEJ2	PCY1A_HUMAN	PCYT1A	Choline-phosphate cytidylyltransferase A	1	ERSPSPSFR	ERS(UniMod:21)PS(UniMod:21)PSFR	2	ERS(UniMod:21)PS(UniMod:21)PSFR2	2.61341e+06	3.14313e+06	2.59789e+06
Q9Y2V2	Q9Y2V2;H3BPY5;H3BTK3;H3BSW7;I3L3X8;H3BUY4;H3BNU9	CHSP1_HUMAN	CARHSP1	Calcium-regulated heat-stable protein 1	1	ERSPSPLR	ERS(UniMod:21)PSPLR	2	ERS(UniMod:21)PSPLR2	1.8193e+06	1.97674e+06	1.94134e+06
O95218	O95218	ZRAB2_HUMAN	ZRANB2	Zinc finger Ran-binding domain-containing protein 2	1	ESEGEEEDEDEDLSK	ES(UniMod:21)EGEEEDEDEDLSK	2	ES(UniMod:21)EGEEEDEDEDLSK2	210197	192967	188601
O75151	O75151	PHF2_HUMAN	PHF2	Lysine-specific demethylase PHF2	1	ESASPTIPNLDLLEAHTK	ESAS(UniMod:21)PTIPNLDLLEAHTK	3	ESAS(UniMod:21)PTIPNLDLLEAHTK3	290494	259197	320202
Q8IZ21	Q8IZ21	PHAR4_HUMAN	PHACTR4	Phosphatase and actin regulator 4	1	ESDSDSEGPIQYRDEEDEDESYQSALANK	ESDSDS(UniMod:21)EGPIQYRDEEDEDESYQSALANK	3	ESDSDS(UniMod:21)EGPIQYRDEEDEDESYQSALANK3	467624	552234	414319
P07900	P07900	HS90A_HUMAN	HSP90AA1	Heat shock protein HSP 90-alpha	1	ESEDKPEIEDVGSDEEEEK	ESEDKPEIEDVGS(UniMod:21)DEEEEK	2	ESEDKPEIEDVGS(UniMod:21)DEEEEK2	1.34821e+06	1.32751e+06
Q14676	Q14676	MDC1_HUMAN	MDC1	Mediator of DNA damage checkpoint protein 1	1	ESEDSETQPFDTHLEAYGPCLSPPR	ESEDSETQPFDTHLEAYGPC(UniMod:4)LS(UniMod:21)PPR	3	ESEDSETQPFDTHLEAYGPC(UniMod:4)LS(UniMod:21)PPR3	1.76674e+06	2.49669e+06	2.43095e+06
O00418	O00418	EF2K_HUMAN	EEF2K	Eukaryotic elongation factor 2 kinase	1	ESENSGDSGYPSEK	ESENSGDSGYPS(UniMod:21)EK	2	ESENSGDSGYPS(UniMod:21)EK2	476268	430179	451167
Q86W56	Q86W56	PARG_HUMAN	PARG	Poly(ADP-ribose) glycohydrolase	1	ESEPESPMDVDNSK	ESEPES(UniMod:21)PMDVDNSK	2	ESEPES(UniMod:21)PMDVDNSK2	87208.1	110427	111737
Q9BW71	Q9BW71	HIRP3_HUMAN	HIRIP3	HIRA-interacting protein 3	1	ESEQESEEEILAQK	ESEQES(UniMod:21)EEEILAQK	2	ESEQES(UniMod:21)EEEILAQK2	1.77178e+06	1.94876e+06	1.98744e+06
Q9ULJ3	Q9ULJ3	ZBT21_HUMAN	ZBTB21	Zinc finger and BTB domain-containing protein 21	1	ESEVCPVPTNSPSPPPLPPPPPLPK	ESEVC(UniMod:4)PVPTNS(UniMod:21)PS(UniMod:21)PPPLPPPPPLPK	3	ESEVC(UniMod:4)PVPTNS(UniMod:21)PS(UniMod:21)PPPLPPPPPLPK3	247083	573159	226031
O75528	O75528	TADA3_HUMAN	TADA3	Transcriptional adapter 3	1	ESGADGASTSPR	ESGADGASTS(UniMod:21)PR	2	ESGADGASTS(UniMod:21)PR2	685678	668650	729269
Q96T58	Q96T58	MINT_HUMAN	SPEN	Msx2-interacting protein	1	ESGVVAVSPEK	ESGVVAVS(UniMod:21)PEK	2	ESGVVAVS(UniMod:21)PEK2	330643	374545	320550
P25788	P25788;H0YJ03;G3V4X5	PSA3_HUMAN	PSMA3	Proteasome subunit alpha type-3	1	ESLKEEDESDDDNM	ESLKEEDES(UniMod:21)DDDNM	2	ESLKEEDES(UniMod:21)DDDNM2	6.79904e+07	7.17371e+07	7.64883e+07
Q9H307	Q9H307;G3V5F0;G3V579	PININ_HUMAN	PNN	Pinin	1	ESRQESDPEDDDVK	ESRQES(UniMod:21)DPEDDDVK	2	ESRQES(UniMod:21)DPEDDDVK2	5.7228e+06	6.77061e+06	6.97512e+06
Q6IBW4	Q6IBW4;A0A0A6YYG7;E5RJN3	CNDH2_HUMAN	NCAPH2	Condensin-2 complex subunit H2	1	ESRSPQQSAALPR	ESRS(UniMod:21)PQQSAALPR	3	ESRS(UniMod:21)PQQSAALPR3	930488	1.17039e+06	1.14508e+06
H0YKH0;H0YKT5;H0YLI3	Q04726;H0YNT2;H0YKN8;H0YL70;H0YLW9;H0YLI3;H0YKT5;H0YKH0	H0YKH0_HUMAN;H0YKT5_HUMAN;H0YLI3_HUMAN	TLE3	Transducin-like enhancer protein 3	1	ESSANNSVSPSESLR	ESSANNSVS(UniMod:21)PSESLR	2	ESSANNSVS(UniMod:21)PSESLR2	3.53487e+06	4.09464e+06	3.90588e+06
P17544	P17544	ATF7_HUMAN	ATF7	Cyclic AMP-dependent transcription factor ATF-7	1	ESSEPTGSPAPVIQHSSATAPSNGLSVR	ESSEPTGS(UniMod:21)PAPVIQHSSATAPSNGLSVR	3	ESSEPTGS(UniMod:21)PAPVIQHSSATAPSNGLSVR3	849924	926989	1.08774e+06
O75122	O75122;A0A0U1RQI6;J3KR49;H7C4M5;E3W994;E7EW49;A0A804HJG7;E7ERI8	CLAP2_HUMAN	CLASP2	CLIP-associating protein 2	1	ESSRDTSPVR	ESSRDTS(UniMod:21)PVR	2	ESSRDTS(UniMod:21)PVR2	349883	427133	462070
Q9UPS8	Q9UPS8;A0A6Q8PF30;E7ESJ3	ANR26_HUMAN	ANKRD26	Ankyrin repeat domain-containing protein 26	1	ESVNSPVFGK	ESVNS(UniMod:21)PVFGK	2	ESVNS(UniMod:21)PVFGK2			146886
P16949	P16949;A2A2D0	STMN1_HUMAN	STMN1	Stathmin	1	ESVPEFPLSPPK	ESVPEFPLS(UniMod:21)PPK	2	ESVPEFPLS(UniMod:21)PPK2	697466	822625	660430
P35251	P35251	RFC1_HUMAN	RFC1	Replication factor C subunit 1	1	ESVSPEDSEK	ESVS(UniMod:21)PEDSEK	2	ESVS(UniMod:21)PEDSEK2	1.13882e+06	1.15838e+06	1.09725e+06
Q9BQA1	Q9BQA1	MEP50_HUMAN	WDR77	Methylosome protein 50	1	ETPPPLVPPAAR	ET(UniMod:21)PPPLVPPAAR	2	ET(UniMod:21)PPPLVPPAAR2	134458	209309	126425
A0A804HKE7;E7EVA0	P27816;A0A804HKE7;E7EVA0	A0A804HKE7_HUMAN;E7EVA0_HUMAN	MAP4	Microtubule-associated protein	1	ETERASPIK	ETERAS(UniMod:21)PIK	2	ETERAS(UniMod:21)PIK2	1.67222e+07	1.74731e+07	1.89943e+07
Q6PKG0	Q6PKG0;A0A0B4J210;H0YBW1;E5RH50;A0A8I5KWU3;A0A8I5KSP1	LARP1_HUMAN	LARP1	La-related protein 1	1	ETESAPGSPR	ETES(UniMod:21)APGS(UniMod:21)PR	2	ETES(UniMod:21)APGS(UniMod:21)PR2	1.65335e+07	1.81665e+07	1.89845e+07
A9Z1X7	Q8IYB3;A9Z1X7	A9Z1X7_HUMAN	SRRM1	Serine/arginine repetitive matrix protein 1	1	ETESEAEDNLDDLEK	ETES(UniMod:21)EAEDNLDDLEK	2	ETES(UniMod:21)EAEDNLDDLEK2	696577	662480	642078
Q6PKG0	Q6PKG0;A0A0B4J210;H0YBW1;E5RH50;A0A8I5KWU3;A0A8I5KSP1	LARP1_HUMAN	LARP1	La-related protein 1	1	ETESAPGSPR	ETESAPGS(UniMod:21)PR	2	ETESAPGS(UniMod:21)PR2	1.82141e+06	1.93636e+06	1.8486e+06
Q15424	Q15424	SAFB1_HUMAN	SAFB	Scaffold attachment factor B1	1	ETINNLDTSSSDFTILQEIEEPSLEPENEK	ETINNLDTSSSDFT(UniMod:21)ILQEIEEPSLEPENEK	3	ETINNLDTSSSDFT(UniMod:21)ILQEIEEPSLEPENEK3	1.34101e+06	571397	295055
P80723	P80723	BASP1_HUMAN	BASP1	Brain acid soluble protein 1	1	ETPAATEAPSSTPK	ETPAATEAPSST(UniMod:21)PK	2	ETPAATEAPSST(UniMod:21)PK2	631661	568321	728270
Q9UHB6	Q9UHB6;F8VS07;F8VQE1	LIMA1_HUMAN	LIMA1	LIM domain and actin-binding protein 1	1	ETPHSPGVEDAPIAK	ETPHS(UniMod:21)PGVEDAPIAK	2	ETPHS(UniMod:21)PGVEDAPIAK2	9.75569e+06	9.18726e+06	1.18238e+07
Q9UHB6	Q9UHB6;F8VS07;F8VQE1	LIMA1_HUMAN	LIMA1	LIM domain and actin-binding protein 1	1	ETPHSPGVEDAPIAK	ETPHS(UniMod:21)PGVEDAPIAK	3	ETPHS(UniMod:21)PGVEDAPIAK3	1.19891e+07	1.32995e+07	1.3183e+07
Q9NYF8	Q9NYF8;A0A1W2PQ43;E9PK91;E9PK09;E9PKI6;E9PQN2	BCLF1_HUMAN	BCLAF1	Bcl-2-associated transcription factor 1	1	ETQSPEQVK	ETQS(UniMod:21)PEQVK	2	ETQS(UniMod:21)PEQVK2	1.46322e+07	1.62266e+07	1.46864e+07
O75475	O75475	PSIP1_HUMAN	PSIP1	PC4 and SFRS1-interacting protein	1	ETSVSKEDTDHEEK	ETS(UniMod:21)VSKEDTDHEEK	3	ETS(UniMod:21)VSKEDTDHEEK3	3.41828e+06	3.4621e+06	3.21726e+06
P49137	P49137	MAPK2_HUMAN	MAPKAPK2	MAP kinase-activated protein kinase 2	1	ETTSHNSLTTPCYTPYYVAPEVLGPEK	ETTSHNS(UniMod:21)LTTPC(UniMod:4)YTPYYVAPEVLGPEK	3	ETTSHNS(UniMod:21)LTTPC(UniMod:4)YTPYYVAPEVLGPEK3	747324	1.14078e+06	952261
Q53GS9	Q53GS9;B9A018;F8WC91	SNUT2_HUMAN	USP39	U4/U6.U5 tri-snRNP-associated protein 2	1	EVDEDSEPER	EVDEDS(UniMod:21)EPER	2	EVDEDS(UniMod:21)EPER2	454236	495819	405599
Q53GS9	Q53GS9;B9A018;F8WC91	SNUT2_HUMAN	USP39	U4/U6.U5 tri-snRNP-associated protein 2	1	EVDEDSEPEREVR	EVDEDS(UniMod:21)EPEREVR	2	EVDEDS(UniMod:21)EPEREVR2	2.35138e+06		1.6791e+06
Q13043	Q13043;F5H5B4	STK4_HUMAN	STK4	Serine/threonine-protein kinase 4	1	EVDQDDEENSEEDEMDSGTMVR	EVDQDDEENS(UniMod:21)EEDEMDSGTMVR	3	EVDQDDEENS(UniMod:21)EEDEMDSGTMVR3	148567	263393	141186
P51532	P51532;A0A2R8Y4C5;A0A2R8YG32;A0A2R8Y6V2;A0A2R8YDA1;K7EQF0;A0A2R8YF58;K7EP28;A0A2R8YFK5;A0A2R8Y440;A0A2R8Y5K3;Q9HBD4;A0A2R8Y526;A0A2R8Y7F3;A0A2R8Y4P4;A0A2R8Y6N0;A0A2R8YF80;A0A2R8Y7Y7;A0A2R8Y7S2;A0A2R8YGG3;A0A2R8Y523	SMCA4_HUMAN	SMARCA4	Transcription activator BRG1	1	EVDYSDSLTEK	EVDYSDSLT(UniMod:21)EK	2	EVDYSDSLT(UniMod:21)EK2	1.29731e+06	1.49302e+06	1.33219e+06
O95218	O95218	ZRAB2_HUMAN	ZRANB2	Zinc finger Ran-binding domain-containing protein 2	1	EVEDKESEGEEEDEDEDLSK	EVEDKES(UniMod:21)EGEEEDEDEDLSK	3	EVEDKES(UniMod:21)EGEEEDEDEDLSK3	86227.8	105114	92098.3
P19338	P19338;A0A7I2V3F3;A0A7I2V349;H7BY16;A0A7I2V2S8;A0A7I2V5M5;A0A7I2V506;A0A7I2V2U7;C9JLB1;A0A7I2V699;A0A7I2V428	NUCL_HUMAN	NCL	Nucleolin	1	EVEEDSEDEEMSEDEEDDSSGEEVVIPQK	EVEEDS(UniMod:21)EDEEMS(UniMod:21)EDEEDDS(UniMod:21)SGEEVVIPQK	3	EVEEDS(UniMod:21)EDEEMS(UniMod:21)EDEEDDS(UniMod:21)SGEEVVIPQK3	2.50213e+07	3.39827e+07	2.62321e+07
P19338	P19338;A0A7I2V3F3;A0A7I2V349;H7BY16;A0A7I2V2S8;A0A7I2V5M5;A0A7I2V506;A0A7I2V2U7;C9JLB1;A0A7I2V699;A0A7I2V428	NUCL_HUMAN	NCL	Nucleolin	1	EVEEDSEDEEMSEDEEDDSSGEEVVIPQKK	EVEEDSEDEEMSEDEEDDSS(UniMod:21)GEEVVIPQKK	3	EVEEDSEDEEMSEDEEDDSS(UniMod:21)GEEVVIPQKK3	564329	368882	247862
Q9UPN3	O94854;Q9UPN3;H3BQK9;H0Y390;A0A804HL78;A0A590UJG2;A0A7P0MQR8;H3BPE1	MACF1_HUMAN	MACF1	Microtubule-actin cross-linking factor 1, isoforms 1/2/3/4/5	1	EVEEELATSGGQSPTGEQIPQFQQR	EVEEELATS(UniMod:21)GGQSPTGEQIPQFQQR	3	EVEEELATS(UniMod:21)GGQSPTGEQIPQFQQR3	577044	784016
Q9UPN3	O94854;Q9UPN3;H3BQK9;H0Y390;A0A804HL78;A0A590UJG2;A0A7P0MQR8;H3BPE1	MACF1_HUMAN	MACF1	Microtubule-actin cross-linking factor 1, isoforms 1/2/3/4/5	1	EVEEELATSGGQSPTGEQIPQFQQR	EVEEELATSGGQS(UniMod:21)PTGEQIPQFQQR	3	EVEEELATSGGQS(UniMod:21)PTGEQIPQFQQR3			674950
Q9P287	Q9P287	BCCIP_HUMAN	BCCIP	BRCA2 and CDKN1A-interacting protein	1	EVENEDEDDDDSDK	EVENEDEDDDDS(UniMod:21)DK	2	EVENEDEDDDDS(UniMod:21)DK2		347983
Q96CP6	Q96CP6;M0QZ12	ASTRA_HUMAN	GRAMD1A	Protein Aster-A	1	EVGDVIALSDITSSGAADRSQEPSPVGSR	EVGDVIALSDITS(UniMod:21)SGAADRSQEPS(UniMod:21)PVGSR	3	EVGDVIALSDITS(UniMod:21)SGAADRSQEPS(UniMod:21)PVGSR3	168491	194738
Q9NQX3	Q9NQX3;H0YJ30;F5H039;G3V582	GEPH_HUMAN	GPHN	Gephyrin	1	EVHDELEDLPSPPPPLSPPPTTSPHK	EVHDELEDLPSPPPPLS(UniMod:21)PPPT(UniMod:21)TSPHK	3	EVHDELEDLPSPPPPLS(UniMod:21)PPPT(UniMod:21)TSPHK3	996568	841332	820062
P46100	P46100	ATRX_HUMAN	ATRX	Transcriptional regulator ATRX	1	EVIEIEDASPTK	EVIEIEDASPT(UniMod:21)K	2	EVIEIEDASPT(UniMod:21)K2	240202	301711	352322
Q9Y3P9	Q9Y3P9	RBGP1_HUMAN	RABGAP1	Rab GTPase-activating protein 1	1	EVLDEDTDEEK	EVLDEDT(UniMod:21)DEEK	2	EVLDEDT(UniMod:21)DEEK2	722162	692320	805375
P46821	P46821;D6RA40;D6RA32	MAP1B_HUMAN	MAP1B	Microtubule-associated protein 1B	1	EVPSKEEPSPVK	EVPSKEEPS(UniMod:21)PVK	2	EVPSKEEPS(UniMod:21)PVK2	3.577e+06	3.91318e+06	4.08144e+06
Q5JSZ5	Q5JSZ5;A0A804HIM8	PRC2B_HUMAN	PRRC2B	Protein PRRC2B	1	EVPWSPSAEK	EVPWS(UniMod:21)PSAEK	2	EVPWS(UniMod:21)PSAEK2	1.06797e+06	1.07776e+06	1.00852e+06
Q9Y388	Q9Y388	RBMX2_HUMAN	RBMX2	RNA-binding motif protein, X-linked 2	1	EVQAEQPSSSSPR	EVQAEQPS(UniMod:21)SSSPR	2	EVQAEQPS(UniMod:21)SSSPR2	1.18697e+06	1.25077e+06	1.25981e+06
P07900	P07900;G3V2J8	HS90A_HUMAN	HSP90AA1	Heat shock protein HSP 90-alpha	1	EVSDDEAEEK	EVS(UniMod:21)DDEAEEK	2	EVS(UniMod:21)DDEAEEK2	3.74781e+06	4.58494e+06	4.91799e+06
Q14C86	Q14C86;F8W9S7;C9IZ08;H0Y4E7;H0Y7I9	GAPD1_HUMAN	GAPVD1	GTPase-activating protein and VPS9 domain-containing protein 1	1	EVSSRPSTPGLSVVSGISATSEDIPNK	EVSS(UniMod:21)RPSTPGLSVVSGISATSEDIPNK	3	EVSS(UniMod:21)RPSTPGLSVVSGISATSEDIPNK3	521147	468753	636545
P46087	P46087;F5GYR3;F5H5X6	NOP2_HUMAN	NOP2	Probable 28S rRNA (cytosine(4447)-C(5))-methyltransferase	1	EVTPESGPPK	EVT(UniMod:21)PESGPPK	2	EVT(UniMod:21)PESGPPK2	656052	618938	672716
P22234	P22234;E9PBS1	PUR6_HUMAN	PAICS	Bifunctional phosphoribosylaminoimidazole carboxylase/phosphoribosylaminoimidazole succinocarboxamide synthetase	1	EVYELLDSPGK	EVYELLDS(UniMod:21)PGK	2	EVYELLDS(UniMod:21)PGK2	2.48991e+06	2.70391e+06	2.57507e+06
A0A7P0T9K5;I3L2J0	Q96RK0;A0A0A0MQR4;I3L1Q4;I3L2J0;I3L135;A0A7P0T9K5;I3L373	A0A7P0T9K5_HUMAN;I3L2J0_HUMAN	CIC	Protein capicua homolog	1	FAELPEFRPEEVLPSPTLQSLATSPR	FAELPEFRPEEVLPSPT(UniMod:21)LQSLATS(UniMod:21)PR	3	FAELPEFRPEEVLPSPT(UniMod:21)LQSLATS(UniMod:21)PR3	950359	1.04853e+06	537221
Q01167	Q01167	FOXK2_HUMAN	FOXK2	Forkhead box protein K2	1	FAQSAPGSPLSSQPVLITVQR	FAQS(UniMod:21)APGS(UniMod:21)PLSSQPVLITVQR	3	FAQS(UniMod:21)APGS(UniMod:21)PLSSQPVLITVQR3	331314	372345	309346
Q01167	Q01167	FOXK2_HUMAN	FOXK2	Forkhead box protein K2	1	FAQSAPGSPLSSQPVLITVQR	FAQSAPGS(UniMod:21)PLSSQPVLITVQR	3	FAQSAPGS(UniMod:21)PLSSQPVLITVQR3	508111	537716	366118
P27540	P27540;A6NGV6	ARNT_HUMAN	ARNT	Aryl hydrocarbon receptor nuclear translocator	1	FARSDDEQSSADK	FARS(UniMod:21)DDEQSSADK	2	FARS(UniMod:21)DDEQSSADK2		766411	738068
P05455	P05455	LA_HUMAN	SSB	Lupus La protein	1	FASDDEHDEHDENGATGPVKR	FAS(UniMod:21)DDEHDEHDENGATGPVKR	3	FAS(UniMod:21)DDEHDEHDENGATGPVKR3		359680	449985
Q9H7N4	Q9H7N4	SFR19_HUMAN	SCAF1	Splicing factor, arginine/serine-rich 19	1	FDIYDPFHPTDEAYSPPPAPEQK	FDIYDPFHPTDEAY(UniMod:21)SPPPAPEQK	3	FDIYDPFHPTDEAY(UniMod:21)SPPPAPEQK3
Q9H7N4	Q9H7N4	SFR19_HUMAN	SCAF1	Splicing factor, arginine/serine-rich 19	1	FDIYDPFHPTDEAYSPPPAPEQK	FDIYDPFHPTDEAYS(UniMod:21)PPPAPEQK	3	FDIYDPFHPTDEAYS(UniMod:21)PPPAPEQK3	6.22196e+06	7.34945e+06	6.78949e+06
P28715	P28715;A0A1W2PS85;A0A090HNM7;R4GMW8;A0A494C0S2	ERCC5_HUMAN	ERCC5	DNA excision repair protein ERCC-5	0	FDSSLLSSDDETK	FDSSLLS(UniMod:21)S(UniMod:21)DDETK	2	FDSSLLS(UniMod:21)S(UniMod:21)DDETK2	1.85702e+06	2.66659e+06	1.912e+06
P54105	P54105;E9PJF4	ICLN_HUMAN	CLNS1A	Methylosome subunit pICln	1	FEEESKEPVADEEEEDSDDDVEPITEFR	FEEES(UniMod:21)KEPVADEEEEDSDDDVEPITEFR	3	FEEES(UniMod:21)KEPVADEEEEDSDDDVEPITEFR3	9.00542e+07	9.56876e+07	8.87059e+07
Q9H5H4	Q9H5H4;H3BS42	ZN768_HUMAN	ZNF768	Zinc finger protein 768	1	FEPESPGFESR	FEPES(UniMod:21)PGFESR	2	FEPES(UniMod:21)PGFESR2	1.1913e+06	1.24133e+06	1.20934e+06
Q13200	Q13200	PSMD2_HUMAN	PSMD2	26S proteasome non-ATPase regulatory subunit 2	1	FGGSGSQVDSAR	FGGS(UniMod:21)GSQVDSAR	2	FGGS(UniMod:21)GSQVDSAR2	168944	291358	279926
Q99590	Q99590;A0A0A0MTP7;F8VXG7	SCAFB_HUMAN	SCAF11	Protein SCAF11	1	FHSPSTTWSPNK	FHS(UniMod:21)PSTTWSPNK	2	FHS(UniMod:21)PSTTWSPNK2	931695	1.22795e+06	1.2722e+06
Q96ST2	Q96ST2	IWS1_HUMAN	IWS1	Protein IWS1 homolog	1	FHSSDSEEEEHK	FHSS(UniMod:21)DS(UniMod:21)EEEEHK	2	FHSS(UniMod:21)DS(UniMod:21)EEEEHK2		1.05821e+06
O43815	O43815	STRN_HUMAN	STRN	Striatin	1	FLESAAADFSDEDEDDDVDGREK	FLESAAADFS(UniMod:21)DEDEDDDVDGREK	3	FLESAAADFS(UniMod:21)DEDEDDDVDGREK3	1.54897e+06	1.46157e+06	1.62015e+06
Q76FK4	Q76FK4;F5H101;F8WE42	NOL8_HUMAN	NOL8	Nucleolar protein 8	1	FLETDSEEEQEEVNEK	FLET(UniMod:21)DS(UniMod:21)EEEQEEVNEK	3	FLET(UniMod:21)DS(UniMod:21)EEEQEEVNEK3	416722	204209
Q13541	Q13541	4EBP1_HUMAN	EIF4EBP1	Eukaryotic translation initiation factor 4E-binding protein 1	1	FLMECRNSPVTK	FLMEC(UniMod:4)RNS(UniMod:21)PVTK	2	FLMEC(UniMod:4)RNS(UniMod:21)PVTK2	6.71598e+06	8.18807e+06	8.47546e+06
Q9NYF8	Q9NYF8;A0A1W2PQ43;E9PK91;E9PK09;E9PKI6;E9PQN2	BCLF1_HUMAN	BCLAF1	Bcl-2-associated transcription factor 1	1	FNDSEGDDTEETEDYR	FNDS(UniMod:21)EGDDT(UniMod:21)EETEDYR	2	FNDS(UniMod:21)EGDDT(UniMod:21)EETEDYR2	399937	343331	553490
Q9NYF8	Q9NYF8;A0A1W2PQ43;E9PK91;E9PK09;E9PKI6;E9PQN2	BCLF1_HUMAN	BCLAF1	Bcl-2-associated transcription factor 1	1	FNDSEGDDTEETEDYR	FNDS(UniMod:21)EGDDTEETEDYR	2	FNDS(UniMod:21)EGDDTEETEDYR2	1.29961e+07	1.53054e+07	1.54419e+07
Q9NYF8	Q9NYF8;A0A1W2PQ43;E9PK91;E9PK09;E9PKI6;E9PQN2	BCLF1_HUMAN	BCLAF1	Bcl-2-associated transcription factor 1	1	FNDSEGDDTEETEDYRQFR	FNDS(UniMod:21)EGDDTEETEDYRQFR	3	FNDS(UniMod:21)EGDDTEETEDYRQFR3	283048
E7EWD5	Q99576;Q5JRJ2;A0A8I5KT94;E7EWD5;Q5JRJ0	E7EWD5_HUMAN	TSC22D3	TSC22 domain family protein 3	1	FQSCLSPEEPAPESPQVPEAPGGSAV	FQSC(UniMod:4)LSPEEPAPES(UniMod:21)PQVPEAPGGSAV	3	FQSC(UniMod:4)LSPEEPAPES(UniMod:21)PQVPEAPGGSAV3	752863	1.02151e+06	900632
Q9P2B4	Q9P2B4	CT2NL_HUMAN	CTTNBP2NL	CTTNBP2 N-terminal-like protein	1	FQSQADQDQQASGLQSPPSR	FQSQADQDQQASGLQS(UniMod:21)PPSR	3	FQSQADQDQQASGLQS(UniMod:21)PPSR3	828945	929153	866360
Q96S66	Q96S66;A0A6Q8PFF7;A0A6Q8PG14;A0A6Q8PG68;Q5T1P5;A0A6Q8PEZ7;A0A6Q8PG75;A0A8I5KRC0;A0A6Q8PG30;A0A6Q8PGA4;A0A6Q8PHQ1	CLCC1_HUMAN	CLCC1	Chloride channel CLIC-like protein 1	1	FQTGNKSPEVLR	FQTGNKS(UniMod:21)PEVLR	2	FQTGNKS(UniMod:21)PEVLR2		319029	160603
Q15942	Q15942;H7C3D3;H0Y2Y8	ZYX_HUMAN	ZYX	Zyxin	1	FSPVTPK	FS(UniMod:21)PVTPK	2	FS(UniMod:21)PVTPK2	656664	712055	546701
Q9Y2W1	Q9Y2W1	TR150_HUMAN	THRAP3	Thyroid hormone receptor-associated protein 3	1	FSGEEGEIEDDESGTENREEK	FSGEEGEIEDDES(UniMod:21)GTENREEK	3	FSGEEGEIEDDES(UniMod:21)GTENREEK3	2.41594e+06	2.53452e+06	1.31548e+06
Q96QD8	Q96QD8;F8VUY8	S38A2_HUMAN	SLC38A2	Sodium-coupled neutral amino acid transporter 2	1	FSISPDEDSSSYSSNSDFNYSYPTK	FSISPDEDSSSY(UniMod:21)SSNS(UniMod:21)DFNYSYPTK	3	FSISPDEDSSSY(UniMod:21)SSNS(UniMod:21)DFNYSYPTK3	873335	861462	584897
Q9P206	Q9P206	K1522_HUMAN	KIAA1522	Uncharacterized protein KIAA1522	1	FSSVSSPQPR	FSSVSS(UniMod:21)PQPR	2	FSSVSS(UniMod:21)PQPR2	220391	133997	141170
Q70E73	Q70E73;C9K0J5	RAPH1_HUMAN	RAPH1	Ras-associated and pleckstrin homology domains-containing protein 1	1	FTPPAESGSPSK	FTPPAES(UniMod:21)GSPSK	2	FTPPAES(UniMod:21)GSPSK2	791557	889626	1.00155e+06
Q13636	Q13636;J3QR51	RAB31_HUMAN	RAB31	Ras-related protein Rab-31	1	FVQDHFDHNISPTIGASFMTK	FVQDHFDHNIS(UniMod:21)PTIGASFMTK	3	FVQDHFDHNIS(UniMod:21)PTIGASFMTK3	506655	348722	640166
Q13263	Q13263;M0R0K9	TIF1B_HUMAN	TRIM28	Transcription intermediary factor 1-beta	1	GAAAAATGQPGTAPAGTPGAPPLAGMAIVK	GAAAAATGQPGT(UniMod:21)APAGTPGAPPLAGMAIVK	3	GAAAAATGQPGT(UniMod:21)APAGTPGAPPLAGMAIVK3	398437	157313	208976
O75962	O75962;E7EPJ7	TRIO_HUMAN	TRIO	Triple functional domain protein	1	GAANASGSSPDAPAK	GAANASGS(UniMod:21)SPDAPAK	2	GAANASGS(UniMod:21)SPDAPAK2	332916	193866	232312
Q8N9B5	Q8N9B5	JMY_HUMAN	JMY	Junction-mediating and -regulatory protein	1	GAASPVLQEDHCDSLPSVLQVEEK	GAAS(UniMod:21)PVLQEDHC(UniMod:4)DSLPSVLQVEEK	3	GAAS(UniMod:21)PVLQEDHC(UniMod:4)DSLPSVLQVEEK3	697272	967646	772838
Q8TDD1	Q8TDD1;H0YHZ9	DDX54_HUMAN	DDX54	ATP-dependent RNA helicase DDX54	1	GAASQARGSDSEDGEFEIQAEDDAR	GAAS(UniMod:21)QARGS(UniMod:21)DSEDGEFEIQAEDDAR	3	GAAS(UniMod:21)QARGS(UniMod:21)DSEDGEFEIQAEDDAR3	934699	1.19666e+06	1.13721e+06
Q7Z417	Q7Z417	NUFP2_HUMAN	NUFIP2	Nuclear fragile X mental retardation-interacting protein 2	1	GADNDGSGSESGYTTPK	GADNDGS(UniMod:21)GS(UniMod:21)ESGYTTPK	2	GADNDGS(UniMod:21)GS(UniMod:21)ESGYTTPK2	1.79354e+06	2.11473e+06	2.10099e+06
Q7Z417	Q7Z417	NUFP2_HUMAN	NUFIP2	Nuclear fragile X mental retardation-interacting protein 2	1	GADNDGSGSESGYTTPK	GADNDGS(UniMod:21)GSESGYTTPK	2	GADNDGS(UniMod:21)GSESGYTTPK2	2.04811e+06	2.27845e+06	2.08415e+06
Q99549	Q99549	MPP8_HUMAN	MPHOSPH8	M-phase phosphoprotein 8	1	GAEAFGDSEEDGEDVFEVEK	GAEAFGDS(UniMod:21)EEDGEDVFEVEK	3	GAEAFGDS(UniMod:21)EEDGEDVFEVEK3	262473	274368	161979
Q9H7N4	Q9H7N4	SFR19_HUMAN	SCAF1	Splicing factor, arginine/serine-rich 19	1	GAEETSWSGEER	GAEETSWS(UniMod:21)GEER	2	GAEETSWS(UniMod:21)GEER2	740191	936637	1.0494e+06
P46821	P46821	MAP1B_HUMAN	MAP1B	Microtubule-associated protein 1B	1	GAESPFEEK	GAES(UniMod:21)PFEEK	2	GAES(UniMod:21)PFEEK2	1.70962e+06	1.92178e+06	1.75288e+06
P16455	P16455;B4DEE8	MGMT_HUMAN	MGMT	Methylated-DNA--protein-cysteine methyltransferase	1	GAGATSGSPPAGRN	GAGATSGS(UniMod:21)PPAGRN	2	GAGATSGS(UniMod:21)PPAGRN2	1.80823e+06	1.70804e+06	1.48963e+06
P35579	P35579;A0A8I5KWT8	MYH9_HUMAN	MYH9	Myosin-9	1	GAGDGSDEEVDGK	GAGDGS(UniMod:21)DEEVDGK	2	GAGDGS(UniMod:21)DEEVDGK2	3.3806e+06	3.80874e+06	3.78478e+06
Q7Z5J4	Q7Z5J4	RAI1_HUMAN	RAI1	Retinoic acid-induced protein 1	1	GAGGSPVGVEEGLVNVGTGQK	GAGGS(UniMod:21)PVGVEEGLVNVGTGQK	3	GAGGS(UniMod:21)PVGVEEGLVNVGTGQK3	42239.9	67791.9	80505.2
Q9P1Y6	Q9P1Y6;B7ZM65;A0A0J9YYB5;E9PJ24;F8WEF5;A0A0J9YWD5;A0A0J9YX88	PHRF1_HUMAN	PHRF1	PHD and RING finger domain-containing protein 1	1	GAVAAEGASDTEREEPTESQGLAAR	GAVAAEGAS(UniMod:21)DTEREEPTESQGLAAR	3	GAVAAEGAS(UniMod:21)DTEREEPTESQGLAAR3	171986	132268	168388
O43395	O43395	PRPF3_HUMAN	PRPF3	U4/U6 small nuclear ribonucleoprotein Prp3	1	GDDDEESDEEAVKK	GDDDEES(UniMod:21)DEEAVKK	2	GDDDEES(UniMod:21)DEEAVKK2	4.31324e+06	4.51399e+06	4.92866e+06
P20908	P20908	CO5A1_HUMAN	COL5A1	Collagen alpha-1(V) chain	1	GDDGEPGQTGSPGPTGEPGPSGPPGK	GDDGEPGQTGSPGPT(UniMod:21)GEPGPS(UniMod:21)GPPGK	3	GDDGEPGQTGSPGPT(UniMod:21)GEPGPS(UniMod:21)GPPGK3	155927	95530.9
Q93074	Q93074;A0A8I5QJW8;A0A8I5KUR0;A0A8I5KQY2;A0A8I5KXK9;A0A8I5KW86;A0A8I5KVA6	MED12_HUMAN	MED12	Mediator of RNA polymerase II transcription subunit 12	1	GDLAFGAPGPRPPSPFDDPADDPEHK	GDLAFGAPGPRPPS(UniMod:21)PFDDPADDPEHK	3	GDLAFGAPGPRPPS(UniMod:21)PFDDPADDPEHK3	923306	827613	1.03722e+06
Q96ST3	Q96ST3	SIN3A_HUMAN	SIN3A	Paired amphipathic helix protein Sin3a	1	GDLSDVEEEEEEEMDVDEATGAVK	GDLS(UniMod:21)DVEEEEEEEMDVDEATGAVK	3	GDLS(UniMod:21)DVEEEEEEEMDVDEATGAVK3	1.1261e+06	1.19261e+06	1.04321e+06
Q96ST3	Q96ST3	SIN3A_HUMAN	SIN3A	Paired amphipathic helix protein Sin3a	1	GDLSDVEEEEEEEMDVDEATGAVKK	GDLS(UniMod:21)DVEEEEEEEMDVDEATGAVKK	3	GDLS(UniMod:21)DVEEEEEEEMDVDEATGAVKK3	904838	835859	1.0915e+06
P22059	P22059	OSBP1_HUMAN	OSBP	Oxysterol-binding protein 1	1	GDMSDEDDENEFFDAPEIITMPENLGHK	GDMS(UniMod:21)DEDDENEFFDAPEIITMPENLGHK	3	GDMS(UniMod:21)DEDDENEFFDAPEIITMPENLGHK3	2.37045e+06	2.95864e+06	1.69958e+06
P22059	P22059	OSBP1_HUMAN	OSBP	Oxysterol-binding protein 1	1	GDMSDEDDENEFFDAPEIITMPENLGHKR	GDMS(UniMod:21)DEDDENEFFDAPEIITMPENLGHKR	3	GDMS(UniMod:21)DEDDENEFFDAPEIITMPENLGHKR3	289432	334483	392408
O00264	O00264	PGRC1_HUMAN	PGRMC1	Membrane-associated progesterone receptor component 1	1	GDQPAASGDSDDDEPPPLPR	GDQPAAS(UniMod:21)GDSDDDEPPPLPR	3	GDQPAAS(UniMod:21)GDSDDDEPPPLPR3	267612	390732	408511
Q09666	Q09666;E9PJZ0;E9PLK4;E9PJC6;E9PKR9	AHNK_HUMAN	AHNAK	Neuroblast differentiation-associated protein AHNAK	1	GDRSPEPGQTWTR	GDRS(UniMod:21)PEPGQTWTR	2	GDRS(UniMod:21)PEPGQTWTR2	2.05769e+06	1.83829e+06	1.86851e+06
Q9UKV3	Q9UKV3;E7EQT4;S4R3H4	ACINU_HUMAN	ACIN1	Apoptotic chromatin condensation inducer in the nucleus	1	GDSDDEKPR	GDS(UniMod:21)DDEKPR	2	GDS(UniMod:21)DDEKPR2	373219	462720	325336
Q92733	Q92733	PRCC_HUMAN	PRCC	Proline-rich protein PRCC	1	GDSDSEEDEPTK	GDS(UniMod:21)DS(UniMod:21)EEDEPTK	2	GDS(UniMod:21)DS(UniMod:21)EEDEPTK2	949955	1.02769e+06	973487
Q92733	Q92733	PRCC_HUMAN	PRCC	Proline-rich protein PRCC	1	GDSDSEEDEPTK	GDS(UniMod:21)DSEEDEPTK	2	GDS(UniMod:21)DSEEDEPTK2	130336	191059	136679
Q9NZ63	Q9NZ63	TLS1_HUMAN	C9orf78	Telomere length and silencing protein 1 homolog	1	GDSESEEDEQDSEEVR	GDS(UniMod:21)ES(UniMod:21)EEDEQDSEEVR	2	GDS(UniMod:21)ES(UniMod:21)EEDEQDSEEVR2	155243	351768	233729
Q8ND56	Q8ND56;K7EMZ9;A0A0G2JQ95;A0A096LP11;A0A140TA76	LS14A_HUMAN	LSM14A	Protein LSM14 homolog A	1	GDSGVDTQNSEGNADEEDPLGPNCYYDK	GDSGVDTQNS(UniMod:21)EGNADEEDPLGPNC(UniMod:4)YYDK	3	GDSGVDTQNS(UniMod:21)EGNADEEDPLGPNC(UniMod:4)YYDK3	63718		40130.2
Q9P2B4	Q9P2B4	CT2NL_HUMAN	CTTNBP2NL	CTTNBP2 N-terminal-like protein	1	GDTSHSPTPGK	GDTSHS(UniMod:21)PTPGK	2	GDTSHS(UniMod:21)PTPGK2	131342	191321	198003
Q15477	Q15477	SKIV2_HUMAN	SKIV2L	Helicase SKI2W	1	GDTVSASPCSAPLAR	GDTVSAS(UniMod:21)PC(UniMod:4)SAPLAR	2	GDTVSAS(UniMod:21)PC(UniMod:4)SAPLAR2	252196	218121
P49006	P49006	MRP_HUMAN	MARCKSL1	MARCKS-related protein	1	GDVTAEEAAGASPAK	GDVTAEEAAGAS(UniMod:21)PAK	2	GDVTAEEAAGAS(UniMod:21)PAK2	81916.3	163313	240959
Q86U86	Q86U86;E7EVG2;H0Y5B5;C9JPI5	PB1_HUMAN	PBRM1	Protein polybromo-1	1	GEADDEDDDEDGQDNQGTVTEGSSPAYLK	GEADDEDDDEDGQDNQGTVTEGSS(UniMod:21)PAYLK	3	GEADDEDDDEDGQDNQGTVTEGSS(UniMod:21)PAYLK3	1.3947e+06	1.37616e+06	1.39611e+06
P46821	P46821	MAP1B_HUMAN	MAP1B	Microtubule-associated protein 1B	1	GEAEQSEEEADEEDK	GEAEQS(UniMod:21)EEEADEEDK	2	GEAEQS(UniMod:21)EEEADEEDK2	5.90276e+06	6.6152e+06	6.31812e+06
Q12906	Q12906	ILF3_HUMAN	ILF3	Interleukin enhancer-binding factor 3	1	GEDSAEETEAK	GEDS(UniMod:21)AEETEAK	2	GEDS(UniMod:21)AEETEAK2	1.14275e+07	1.19202e+07	1.15868e+07
Q6PD62	Q6PD62	CTR9_HUMAN	CTR9	RNA polymerase-associated protein CTR9 homolog	1	GEEGSDDDETENGPK	GEEGS(UniMod:21)DDDETENGPK	2	GEEGS(UniMod:21)DDDETENGPK2	1.6169e+06	1.70051e+06	1.58968e+06
Q6PD62	Q6PD62	CTR9_HUMAN	CTR9	RNA polymerase-associated protein CTR9 homolog	1	GEEGSDDDETENGPKPK	GEEGS(UniMod:21)DDDETENGPKPK	3	GEEGS(UniMod:21)DDDETENGPKPK3	788320	735043	840327
Q9UQ35	Q9UQ35	SRRM2_HUMAN	SRRM2	Serine/arginine repetitive matrix protein 2	1	GEFSASPMLK	GEFSAS(UniMod:21)PMLK	2	GEFSAS(UniMod:21)PMLK2	4.25747e+06	5.2119e+06	4.14663e+06
Q9UQ35	Q9UQ35;I3L4D8;I3L182;A0A087X1W1;I3L1I8	SRRM2_HUMAN	SRRM2	Serine/arginine repetitive matrix protein 2	1	GEGDAPFSEPGTTSTQRPSSPETATK	GEGDAPFSEPGT(UniMod:21)T(UniMod:21)STQRPSSPETATK	3	GEGDAPFSEPGT(UniMod:21)T(UniMod:21)STQRPSSPETATK3	5.99994e+06	6.90311e+06	5.89617e+06
Q9UQ35	Q9UQ35;I3L4D8;I3L182;A0A087X1W1;I3L1I8	SRRM2_HUMAN	SRRM2	Serine/arginine repetitive matrix protein 2	1	GEGDAPFSEPGTTSTQRPSSPETATK	GEGDAPFSEPGTTSTQRPSS(UniMod:21)PETATK	3	GEGDAPFSEPGTTSTQRPSS(UniMod:21)PETATK3	1.07455e+07	1.13812e+07	1.13518e+07
Q86VM9	Q86VM9;E7ERS3	ZCH18_HUMAN	ZC3H18	Zinc finger CCCH domain-containing protein 18	1	GEGTPREEGK	GEGT(UniMod:21)PREEGK	2	GEGT(UniMod:21)PREEGK2	583719	961970	849905
P29966	P29966	MARCS_HUMAN	MARCKS	Myristoylated alanine-rich C-kinase substrate	1	GEPAAAAAPEAGASPVEK	GEPAAAAAPEAGAS(UniMod:21)PVEK	2	GEPAAAAAPEAGAS(UniMod:21)PVEK2	445443	488767	451663
P49841	P49840;P49841;A0A7I2V626;A0A3B3ITW1;A0A7I2V3J4;A0A7I2V4G2;A0A7I2V341;A0A7I2V442;A0A7I2YQK2;A0A7I2YQK0;A0A7I2V2Q4;A8MT37;A0A7I2V3M8	GSK3B_HUMAN	GSK3B	Glycogen synthase kinase-3 beta	0	GEPNVSYICSR	GEPNVSYIC(UniMod:4)S(UniMod:21)R	2	GEPNVSYIC(UniMod:4)S(UniMod:21)R2	9.92592e+06	1.29768e+07	1.25794e+07
O95466	O95466;K7EK60;K7ERL1;K7EJE6	FMNL1_HUMAN	FMNL1	Formin-like protein 1	1	GEPPAPKSPPK	GEPPAPKS(UniMod:21)PPK	2	GEPPAPKS(UniMod:21)PPK2	535258	754358	701759
Q8WWI1	Q8WWI1;E9PMS6;E9PMT2;F8WD26;A0A0A0MTE2;J3KP06	LMO7_HUMAN	LMO7	LIM domain only protein 7	1	GESLDNLDSPR	GES(UniMod:21)LDNLDSPR	2	GES(UniMod:21)LDNLDSPR2	274053	400223	291641
A0A590UJS4	Q6KC79;A0A590UJS4	A0A590UJS4_HUMAN	NIPBL	Nipped-B protein	1	GESRPETPK	GESRPET(UniMod:21)PK	2	GESRPET(UniMod:21)PK2		864875	946634
P49006	P49006	MRP_HUMAN	MARCKSL1	MARCKS-related protein	1	GEVPPKETPK	GEVPPKET(UniMod:21)PK	2	GEVPPKET(UniMod:21)PK2	1.14075e+06	1.24165e+06	1.2864e+06
Q13435	Q13435;E9PPJ0	SF3B2_HUMAN	SF3B2	Splicing factor 3B subunit 2	1	GFEEEHKDSDDDSSDDEQEK	GFEEEHKDS(UniMod:21)DDDS(UniMod:21)S(UniMod:21)DDEQEK	3	GFEEEHKDS(UniMod:21)DDDS(UniMod:21)S(UniMod:21)DDEQEK3	6.20826e+06	5.52189e+06	4.28314e+06
Q9Y5S9	Q9Y5S9	RBM8A_HUMAN	RBM8A	RNA-binding protein 8A	1	GFGSEEGSR	GFGS(UniMod:21)EEGSR	2	GFGS(UniMod:21)EEGSR2	1.34137e+06	1.45935e+06	1.33308e+06
Q14814	Q14814;Q05BX2	MEF2D_HUMAN	MEF2D	Myocyte-specific enhancer factor 2D	1	GFNGCDSPEPDGEDSLEQSPLLEDK	GFNGC(UniMod:4)DS(UniMod:21)PEPDGEDS(UniMod:21)LEQSPLLEDK	3	GFNGC(UniMod:4)DS(UniMod:21)PEPDGEDS(UniMod:21)LEQSPLLEDK3	170044	67770.8
O75533	O75533	SF3B1_HUMAN	SF3B1	Splicing factor 3B subunit 1	1	GGDSIGETPTPGASK	GGDSIGET(UniMod:21)PT(UniMod:21)PGASK	2	GGDSIGET(UniMod:21)PT(UniMod:21)PGASK2	400071	500860	447087
Q96QR8	Q96QR8	PURB_HUMAN	PURB	Transcriptional activator protein Pur-beta	1	GGGSGGGEESEGEEVDED	GGGSGGGEES(UniMod:21)EGEEVDED	2	GGGSGGGEES(UniMod:21)EGEEVDED2	1.54863e+06	1.46612e+06	1.15974e+06
Q9BRQ0	Q9BRQ0;Q5T171	PYGO2_HUMAN	PYGO2	Pygopus homolog 2	1	GGGTPDANSLAPPGK	GGGT(UniMod:21)PDANSLAPPGK	2	GGGT(UniMod:21)PDANSLAPPGK2	858118	783131	507946
P30419	P30419;A0A7I2V3M5;A0A7I2V3X4;A0A7I2V4Y5;K7EN42;A0A7I2V3U5;A0A7I2V539;B7Z8J4	NMT1_HUMAN	NMT1	Glycylpeptide N-tetradecanoyltransferase 1	1	GGLSPANDTGAK	GGLS(UniMod:21)PANDTGAK	2	GGLS(UniMod:21)PANDTGAK2	6.88918e+06	7.41491e+06	7.19157e+06
P30419	P30419;A0A7I2V3M5;A0A7I2V3X4;A0A7I2V4Y5;K7EN42;A0A7I2V3U5;A0A7I2V539;B7Z8J4	NMT1_HUMAN	NMT1	Glycylpeptide N-tetradecanoyltransferase 1	1	GGLSPANDTGAKK	GGLS(UniMod:21)PANDTGAKK	2	GGLS(UniMod:21)PANDTGAKK2		425036	452947
Q9UK61	Q9UK61;A0A087X0F1	TASOR_HUMAN	TASOR	Protein TASOR	1	GGNLPPVSPNDSGAK	GGNLPPVS(UniMod:21)PNDSGAK	2	GGNLPPVS(UniMod:21)PNDSGAK2		202121
Q5STZ8	Q8NE71;Q5STZ8;F5GYK6;A0A0G2JJB9	Q5STZ8_HUMAN	ABCF1	ATP-binding cassette sub-family F member 1	1	GGNVFAALIQDQSEEEEEEEK	GGNVFAALIQDQS(UniMod:21)EEEEEEEK	3	GGNVFAALIQDQS(UniMod:21)EEEEEEEK3	1.35932e+07	1.39158e+07	1.2839e+07
A0A2R8Y4Z8	Q9Y3X0;A0A2R8Y4Z8;M0QYB4	A0A2R8Y4Z8_HUMAN	CCDC9	Coiled-coil domain-containing protein 9	1	GGRTPPQQGGR	GGRT(UniMod:21)PPQQGGR	2	GGRT(UniMod:21)PPQQGGR2	71057.9	200363	171745
A0A140T912;A0A140T9J9;O78179;Q5QT33	A0A140T9M0;A0A0G2JH50;A0A140T912;Q53YP1;A0A140T9J9;Q5QT33;O78179;Q5RIP0	A0A140T912_HUMAN;A0A140T9J9_HUMAN;O78179_HUMAN;Q5QT33_HUMAN	HLA-C	HLA class I histocompatibility antigen, C alpha chain	1	GGSCSQAASSNSAQGSDESLIACKA	GGS(UniMod:21)C(UniMod:4)SQAASSNSAQGS(UniMod:21)DESLIAC(UniMod:4)KA	3	GGS(UniMod:21)C(UniMod:4)SQAASSNSAQGS(UniMod:21)DESLIAC(UniMod:4)KA3	303967	486909	448720
P22626	P22626;A0A7I2V3P1;A0A7I2V323;A0A7I2V3P7;A0A7I2V4N1;A0A024RA28;A0A7I2V4S4	ROA2_HUMAN	HNRNPA2B1	Heterogeneous nuclear ribonucleoproteins A2/B1	1	GGSDGYGSGR	GGS(UniMod:21)DGYGSGR	2	GGS(UniMod:21)DGYGSGR2	449154	448929	362456
Q9UQ35	Q9UQ35	SRRM2_HUMAN	SRRM2	Serine/arginine repetitive matrix protein 2	1	GGSGYHSRSPAR	GGS(UniMod:21)GYHS(UniMod:21)RS(UniMod:21)PAR	2	GGS(UniMod:21)GYHS(UniMod:21)RS(UniMod:21)PAR2	2.77099e+06	3.35708e+06	3.3501e+06
Q13144	Q13144;A0A3B3ITG6;A0A3B3IUB1	EI2BE_HUMAN	EIF2B5	Translation initiation factor eIF-2B subunit epsilon	1	GGSPQMDDIK	GGS(UniMod:21)PQMDDIK	2	GGS(UniMod:21)PQMDDIK2	267774	572441	588255
Q96T37	Q96T37;A0A494C001;A0A087WWP4;A0A499FJY3	RBM15_HUMAN	RBM15	RNA-binding protein 15	1	GGSREYDTGGGSSSSR	GGS(UniMod:21)REYDTGGGSSSSR	2	GGS(UniMod:21)REYDTGGGSSSSR2	1.20715e+06	1.28874e+06	1.27532e+06
A0A140T913;A0A140T9I0;A0A140T9X5;Q53Z42	A0A140T9I0;A0A140T9X5;A0A140T913;Q53Z42	A0A140T913_HUMAN;A0A140T9I0_HUMAN;A0A140T9X5_HUMAN;Q53Z42_HUMAN	HLA-A	HLA class I histocompatibility antigen, A alpha chain	1	GGSYSQAASSDSAQGSDVSLTACKV	GGSYSQAASS(UniMod:21)DSAQGS(UniMod:21)DVS(UniMod:21)LTAC(UniMod:4)KV	3	GGSYSQAASS(UniMod:21)DSAQGS(UniMod:21)DVS(UniMod:21)LTAC(UniMod:4)KV3	1.03046e+06	1.36724e+06	1.08612e+06
A0A140T913;A0A140T9I0;A0A140T9X5;Q53Z42	A0A140T9I0;A0A140T9X5;A0A140T913;Q53Z42	A0A140T913_HUMAN;A0A140T9I0_HUMAN;A0A140T9X5_HUMAN;Q53Z42_HUMAN	HLA-A	HLA class I histocompatibility antigen, A alpha chain	1	GGSYSQAASSDSAQGSDVSLTACK	GGSYSQAASSDS(UniMod:21)AQGSDVSLTAC(UniMod:4)K	3	GGSYSQAASSDS(UniMod:21)AQGSDVSLTAC(UniMod:4)K3	115801	176804	202568
A0A140T913;A0A140T9I0;A0A140T9X5;Q53Z42	A0A140T9I0;A0A140T9X5;A0A140T913;Q53Z42	A0A140T913_HUMAN;A0A140T9I0_HUMAN;A0A140T9X5_HUMAN;Q53Z42_HUMAN	HLA-A	HLA class I histocompatibility antigen, A alpha chain	1	GGSYSQAASSDSAQGSDVSLTACKV	GGSYSQAASSDSAQGS(UniMod:21)DVS(UniMod:21)LTAC(UniMod:4)KV	3	GGSYSQAASSDSAQGS(UniMod:21)DVS(UniMod:21)LTAC(UniMod:4)KV3	754262	942253	747171
Q09666	Q09666	AHNK_HUMAN	AHNAK	Neuroblast differentiation-associated protein AHNAK	1	GGVTGSPEASISGSK	GGVTGS(UniMod:21)PEASISGSK	2	GGVTGS(UniMod:21)PEASISGSK2	1.75564e+07	1.88645e+07	1.83082e+07
Q15003	Q15003;C9JZP1;C9J470;E9PHA2	CND2_HUMAN	NCAPH	Condensin complex subunit 2	1	GHPHSASSPSER	GHPHSASS(UniMod:21)PSER	2	GHPHSASS(UniMod:21)PSER2	535479	693963	745556
Q09666	Q09666	AHNK_HUMAN	AHNAK	Neuroblast differentiation-associated protein AHNAK	1	GHYEVTGSDDETGK	GHYEVTGS(UniMod:21)DDETGK	2	GHYEVTGS(UniMod:21)DDETGK2	2.53309e+07	2.63019e+07	2.726e+07
O75821	O75821;K7EL20;K7ENA8;K7EL60;K7ER90	EIF3G_HUMAN	EIF3G	Eukaryotic translation initiation factor 3 subunit G	1	GIPLATGDTSPEPELLPGAPLPPPK	GIPLATGDTS(UniMod:21)PEPELLPGAPLPPPK	3	GIPLATGDTS(UniMod:21)PEPELLPGAPLPPPK3	5.07238e+06	5.43926e+06	4.45582e+06
Q9H4L7	Q9H4L7;D6RAY8	SMRCD_HUMAN	SMARCAD1	SWI/SNF-related matrix-associated actin-dependent regulator of chromatin subfamily A containing DEAD/H box 1	1	GIQYIDLSSDSEDVVSPNCSNTVQEK	GIQYIDLS(UniMod:21)SDS(UniMod:21)EDVVSPNC(UniMod:4)SNTVQEK	3	GIQYIDLS(UniMod:21)SDS(UniMod:21)EDVVSPNC(UniMod:4)SNTVQEK3	267442	358896	387387
Q9NXV6	Q9NXV6	CARF_HUMAN	CDKN2AIP	CDKN2A-interacting protein	1	GISSSNEGVEEPSK	GIS(UniMod:21)SSNEGVEEPSK	2	GIS(UniMod:21)SSNEGVEEPSK2	1.02107e+06	1.05052e+06	979273
Q8TB72	Q8TB72;A0A0C4DG68;C9JW01	PUM2_HUMAN	PUM2	Pumilio homolog 2	1	GKASPFEEDQNR	GKAS(UniMod:21)PFEEDQNR	2	GKAS(UniMod:21)PFEEDQNR2	1.80605e+06	2.03257e+06	1.96106e+06
P17480	P17480;E9PLT2;E9PKP7	UBF1_HUMAN	UBTF	Nucleolar transcription factor 1	1	GKLPESPK	GKLPES(UniMod:21)PK	2	GKLPES(UniMod:21)PK2	2.29846e+06	2.25973e+06	2.37943e+06
P41227	P41227	NAA10_HUMAN	NAA10	N-alpha-acetyltransferase 10	1	GLAAEDSGGDSK	GLAAEDS(UniMod:21)GGDSK	2	GLAAEDS(UniMod:21)GGDSK2	1.25781e+06	1.21153e+06	1.25976e+06
Q02952	Q02952	AKA12_HUMAN	AKAP12	A-kinase anchor protein 12	1	GLAEVQQDGEAEEGATSDGEK	GLAEVQQDGEAEEGATS(UniMod:21)DGEK	3	GLAEVQQDGEAEEGATS(UniMod:21)DGEK3	600233	780433	809107
Q9P206	Q9P206	K1522_HUMAN	KIAA1522	Uncharacterized protein KIAA1522	1	GLAGPPASPGK	GLAGPPAS(UniMod:21)PGK	2	GLAGPPAS(UniMod:21)PGK2	1.11305e+06	1.22734e+06	1.27218e+06
Q641Q2	Q641Q2;F8W7U3;E7ESD2;A0A087WYF6	WAC2A_HUMAN	WASHC2A	WASH complex subunit 2A	1	GLFSDEEDSEDLFSSQSASK	GLFSDEEDS(UniMod:21)EDLFSSQSASK	3	GLFSDEEDS(UniMod:21)EDLFSSQSASK3		36904.8	14637
Q13425	Q13425;A0A140TA73	SNTB2_HUMAN	SNTB2	Beta-2-syntrophin	1	GLGPPSPPAPPR	GLGPPS(UniMod:21)PPAPPR	2	GLGPPS(UniMod:21)PPAPPR2	1.26295e+06	1.45493e+06	1.75259e+06
Q86YP4	Q86YP4;H7C3H1;C9JVY3;V9GY85;C9JGN4;V9GYX5;C9JJK9;C9JMI3	P66A_HUMAN	GATAD2A	Transcriptional repressor p66-alpha	1	GLLASDLNTDGDMRVTPEPGAGPTQGLLR	GLLASDLNTDGDMRVT(UniMod:21)PEPGAGPTQGLLR	3	GLLASDLNTDGDMRVT(UniMod:21)PEPGAGPTQGLLR3	663697	843639	846737
P49736	P49736	MCM2_HUMAN	MCM2	DNA replication licensing factor MCM2	1	GLLYDSDEEDEERPAR	GLLYDS(UniMod:21)DEEDEERPAR	2	GLLYDS(UniMod:21)DEEDEERPAR2	193821	242617
Q9NPQ8	Q9NPQ8;H0YC88;H0YE35	RIC8A_HUMAN	RIC8A	Synembryn-A	1	GLMAGGRPEGQYSEDEDTDTDEYK	GLMAGGRPEGQYS(UniMod:21)EDEDT(UniMod:21)DTDEYK	3	GLMAGGRPEGQYS(UniMod:21)EDEDT(UniMod:21)DTDEYK3	4.84813e+06	5.17096e+06	5.35981e+06
Q9UK58	Q9UK58	CCNL1_HUMAN	CCNL1	Cyclin-L1	1	GLNPDGTPALSTLGGFSPASKPSSPR	GLNPDGTPALSTLGGFS(UniMod:21)PASKPS(UniMod:21)SPR	3	GLNPDGTPALSTLGGFS(UniMod:21)PASKPS(UniMod:21)SPR3	2.54299e+06	3.0669e+06	2.79034e+06
Q5JTV8	Q5JTV8;H0YDU3;A0A0A0MSK5;J3KN66	TOIP1_HUMAN	TOR1AIP1	Torsin-1A-interacting protein 1	1	GLRDSHSSEEDEASSQTDLSQTISK	GLRDS(UniMod:21)HS(UniMod:21)S(UniMod:21)EEDEASSQTDLSQTISK	3	GLRDS(UniMod:21)HS(UniMod:21)S(UniMod:21)EEDEASSQTDLSQTISK3	4.70678e+06	4.27638e+06	4.76454e+06
Q5JTV8	Q5JTV8;H0YDU3;A0A0A0MSK5;J3KN66	TOIP1_HUMAN	TOR1AIP1	Torsin-1A-interacting protein 1	1	GLRDSHSSEEDEASSQTDLSQTISK	GLRDSHS(UniMod:21)S(UniMod:21)EEDEASSQTDLSQTISK	3	GLRDSHS(UniMod:21)S(UniMod:21)EEDEASSQTDLSQTISK3	6.1162e+06	6.80219e+06	8.47068e+06
P51858	P51858	HDGF_HUMAN	HDGF	Hepatoma-derived growth factor	1	GNAEGSSDEEGK	GNAEGS(UniMod:21)S(UniMod:21)DEEGK	2	GNAEGS(UniMod:21)S(UniMod:21)DEEGK2	4.41735e+06	4.28472e+06	4.11116e+06
P51858	P51858	HDGF_HUMAN	HDGF	Hepatoma-derived growth factor	1	GNAEGSSDEEGKLVIDEPAK	GNAEGS(UniMod:21)S(UniMod:21)DEEGKLVIDEPAK	3	GNAEGS(UniMod:21)S(UniMod:21)DEEGKLVIDEPAK3	3.50401e+06	3.9171e+06	3.78044e+06
P51858	P51858	HDGF_HUMAN	HDGF	Hepatoma-derived growth factor	1	GNAEGSSDEEGK	GNAEGSS(UniMod:21)DEEGK	2	GNAEGSS(UniMod:21)DEEGK2	400057	404563	384622
P49736	P49736;C9J013;F8WDM3;C9JZ21	MCM2_HUMAN	MCM2	DNA replication licensing factor MCM2	1	GNDPLTSSPGR	GNDPLTS(UniMod:21)S(UniMod:21)PGR	2	GNDPLTS(UniMod:21)S(UniMod:21)PGR2	1.62355e+06	2.15786e+06	2.00924e+06
P49736	P49736;C9J013;F8WDM3;C9JZ21	MCM2_HUMAN	MCM2	DNA replication licensing factor MCM2	1	GNDPLTSSPGR	GNDPLTSS(UniMod:21)PGR	2	GNDPLTSS(UniMod:21)PGR2	1.8378e+07	1.95408e+07	2.03661e+07
O75351	O75351;K7EKZ3	VPS4B_HUMAN	VPS4B	Vacuolar protein sorting-associated protein 4B	1	GNDSDGEGESDDPEK	GNDS(UniMod:21)DGEGESDDPEK	2	GNDS(UniMod:21)DGEGESDDPEK2	5.68456e+06	5.96275e+06	5.92813e+06
Q9Y6M7	Q9Y6M7;E9PFN4;C9JRP1;A0A0A0MST8	S4A7_HUMAN	SLC4A7	Sodium bicarbonate cotransporter 3	1	GNGSGGSRENSTVDFSK	GNGSGGS(UniMod:21)RENSTVDFSK	2	GNGSGGS(UniMod:21)RENSTVDFSK2	1.31587e+06	1.4112e+06	1.22906e+06
P41227	P41227	NAA10_HUMAN	NAA10	N-alpha-acetyltransferase 10	1	GNSPPSSGEACR	GNS(UniMod:21)PPSSGEAC(UniMod:4)R	2	GNS(UniMod:21)PPSSGEAC(UniMod:4)R2	154190	134278	151136
E7EX44	Q05682;A0A6Q8PGI1;E9PGZ1;E7EX44	E7EX44_HUMAN	CALD1	Caldesmon	1	GNVFSSPTAAGTPNK	GNVFSS(UniMod:21)PTAAGT(UniMod:21)PNK	2	GNVFSS(UniMod:21)PTAAGT(UniMod:21)PNK2	208945	345231	146517
Q9Y2V2	Q9Y2V2;H3BPY5;H3BTK3;H3BSW7;I3L3X8;H3BUY4;H3BNU9	CHSP1_HUMAN	CARHSP1	Calcium-regulated heat-stable protein 1	1	GNVVPSPLPTR	GNVVPS(UniMod:21)PLPTR	2	GNVVPS(UniMod:21)PLPTR2	1.43251e+06	1.53883e+06	1.33445e+06
Q9Y2V2	Q9Y2V2;H3BPY5;H3BTK3;H3BSW7;I3L3X8;H3BUY4;H3BNU9	CHSP1_HUMAN	CARHSP1	Calcium-regulated heat-stable protein 1	1	GNVVPSPLPTRR	GNVVPS(UniMod:21)PLPTRR	2	GNVVPS(UniMod:21)PLPTRR2	2.41446e+06	2.21695e+06	2.53844e+06
Q13425	Q13425;A0A140TA73	SNTB2_HUMAN	SNTB2	Beta-2-syntrophin	1	GPAGEAGASPPVRR	GPAGEAGAS(UniMod:21)PPVRR	2	GPAGEAGAS(UniMod:21)PPVRR2	2.09665e+06	2.42792e+06	2.46191e+06
Q96ST2	Q96ST2	IWS1_HUMAN	IWS1	Protein IWS1 homolog	1	GPASDSETEDASR	GPAS(UniMod:21)DS(UniMod:21)ETEDASR	2	GPAS(UniMod:21)DS(UniMod:21)ETEDASR2	1.07895e+07	1.19745e+07	1.03853e+07
Q14934	Q14934	NFAC4_HUMAN	NFATC4	Nuclear factor of activated T-cells, cytoplasmic 4	1	GPEDSWLLLSAPGPTPASPRPASPCGK	GPEDSWLLLSAPGPT(UniMod:21)PASPRPASPC(UniMod:4)GK	3	GPEDSWLLLSAPGPT(UniMod:21)PASPRPASPC(UniMod:4)GK3	677217	484645	550324
Q96MG7	Q96MG7	NSE3_HUMAN	NSMCE3	Non-structural maintenance of chromosomes element 3 homolog	1	GPGGSQGSQGPSPQGAR	GPGGSQGSQGPS(UniMod:21)PQGAR	2	GPGGSQGSQGPS(UniMod:21)PQGAR2	475440	462235	605325
O95400	O95400	CD2B2_HUMAN	CD2BP2	CD2 antigen cytoplasmic tail-binding protein 2	1	GPGQPSSPQR	GPGQPS(UniMod:21)SPQR	2	GPGQPS(UniMod:21)SPQR2			1.27186e+06
O95400	O95400	CD2B2_HUMAN	CD2BP2	CD2 antigen cytoplasmic tail-binding protein 2	1	GPGQPSSPQR	GPGQPSS(UniMod:21)PQR	2	GPGQPSS(UniMod:21)PQR2	1.43116e+06	1.27477e+06
Q6ZTN6	Q6ZTN6;A0A6E1YH78	AN13D_HUMAN	ANKRD13D	Ankyrin repeat domain-containing protein 13D	1	GPGSPPRTPPAPGPPSFEEQLR	GPGS(UniMod:21)PPRT(UniMod:21)PPAPGPPSFEEQLR	3	GPGS(UniMod:21)PPRT(UniMod:21)PPAPGPPSFEEQLR3	1.51186e+06	1.894e+06	1.49418e+06
Q9UKJ3	Q9UKJ3	GPTC8_HUMAN	GPATCH8	G patch domain-containing protein 8	1	GPKPEPPGSGSPAPPR	GPKPEPPGSGS(UniMod:21)PAPPR	3	GPKPEPPGSGS(UniMod:21)PAPPR3	570269	542637	735481
P42167	P42166;P42167;G5E972	LAP2B_HUMAN	TMPO	Lamina-associated polypeptide 2, isoforms beta/gamma	1	GPPDFSSDEEREPTPVLGSGAAAAGR	GPPDFS(UniMod:21)S(UniMod:21)DEEREPTPVLGSGAAAAGR	3	GPPDFS(UniMod:21)S(UniMod:21)DEEREPTPVLGSGAAAAGR3	3.12099e+07	3.79264e+07	3.51596e+07
P42167	P42166;P42167;G5E972	LAP2B_HUMAN	TMPO	Lamina-associated polypeptide 2, isoforms beta/gamma	1	GPPDFSSDEEREPTPVLGSGAAAAGR	GPPDFS(UniMod:21)SDEEREPTPVLGSGAAAAGR	3	GPPDFS(UniMod:21)SDEEREPTPVLGSGAAAAGR3	8.20693e+06	9.52811e+06	9.84136e+06
P42167	P42166;P42167;G5E972	LAP2B_HUMAN	TMPO	Lamina-associated polypeptide 2, isoforms beta/gamma	1	GPPDFSSDEEREPTPVLGSGAAAAGR	GPPDFSSDEEREPT(UniMod:21)PVLGSGAAAAGR	3	GPPDFSSDEEREPT(UniMod:21)PVLGSGAAAAGR3	6.98253e+06	6.77672e+06	7.97817e+06
P46087	P46087	NOP2_HUMAN	NOP2	Probable 28S rRNA (cytosine(4447)-C(5))-methyltransferase	1	GPQPPTVSPIR	GPQPPTVS(UniMod:21)PIR	2	GPQPPTVS(UniMod:21)PIR2	2.78722e+06	3.28179e+06	3.36245e+06
Q69YN4	Q69YN4	VIR_HUMAN	VIRMA	Protein virilizer homolog	1	GPRTPPGPPPPDDDEDDPVPLPVSGDK	GPRT(UniMod:21)PPGPPPPDDDEDDPVPLPVSGDK	3	GPRT(UniMod:21)PPGPPPPDDDEDDPVPLPVSGDK3	136449	100381	67853.7
Q5T200	Q5T200;A0A7I2V4I5	ZC3HD_HUMAN	ZC3H13	Zinc finger CCCH domain-containing protein 13	1	GPRTPPITTK	GPRT(UniMod:21)PPITTK	2	GPRT(UniMod:21)PPITTK2		248310
O14497	O14497;A0A1B0GTU5;H0Y488	ARI1A_HUMAN	ARID1A	AT-rich interactive domain-containing protein 1A	1	GPSPSPVGSPASVAQSR	GPS(UniMod:21)PSPVGSPASVAQSR	2	GPS(UniMod:21)PSPVGSPASVAQSR2	62664.2		120608
Q9H7N4	Q9H7N4	SFR19_HUMAN	SCAF1	Splicing factor, arginine/serine-rich 19	1	GPSPAPASSPKR	GPSPAPAS(UniMod:21)SPKR	2	GPSPAPAS(UniMod:21)SPKR2
P84157	P84157;Q6ZR64	MXRA7_HUMAN	MXRA7	Matrix-remodeling-associated protein 7	1	GPSSEGPEEEDGEGFSFKYSPGK	GPSSEGPEEEDGEGFSFKYS(UniMod:21)PGK	3	GPSSEGPEEEDGEGFSFKYS(UniMod:21)PGK3
O95684	O95684	CEP43_HUMAN	CEP43	Centrosomal protein 43	1	GPTTGEGALDLSDVHSPPKSPEGK	GPTTGEGALDLS(UniMod:21)DVHSPPKS(UniMod:21)PEGK	3	GPTTGEGALDLS(UniMod:21)DVHSPPKS(UniMod:21)PEGK3	6.70294e+06		8.05848e+06
O95684	O95684	CEP43_HUMAN	CEP43	Centrosomal protein 43	1	GPTTGEGALDLSDVHSPPKSPEGK	GPTTGEGALDLSDVHS(UniMod:21)PPKS(UniMod:21)PEGK	3	GPTTGEGALDLSDVHS(UniMod:21)PPKS(UniMod:21)PEGK3		7.79635e+06
O14920	O14920;A0A499FJS7	IKKB_HUMAN	IKBKB	Inhibitor of nuclear factor kappa-B kinase subunit beta	1	GPVSGSPDSMNASR	GPVSGS(UniMod:21)PDSMNASR	2	GPVSGS(UniMod:21)PDSMNASR2	195590	200950	267873
Q2KHR3	Q2KHR3;H0YCQ7;A0A3B3IRW6	QSER1_HUMAN	QSER1	Glutamine and serine-rich protein 1	1	GQDTVAIEGFTDEEDTESGGEGQYR	GQDTVAIEGFTDEEDT(UniMod:21)ES(UniMod:21)GGEGQYR	3	GQDTVAIEGFTDEEDT(UniMod:21)ES(UniMod:21)GGEGQYR3	816878	977121	635001
P78559	P78559;E9PGC8	MAP1A_HUMAN	MAP1A	Microtubule-associated protein 1A	1	GQDVVQEWQETSPTREEPAGEQK	GQDVVQEWQETS(UniMod:21)PTREEPAGEQK	3	GQDVVQEWQETS(UniMod:21)PTREEPAGEQK3	455140	534689	425609
P78559	P78559;E9PGC8	MAP1A_HUMAN	MAP1A	Microtubule-associated protein 1A	1	GQDVVQEWQETSPTREEPAGEQK	GQDVVQEWQETSPT(UniMod:21)REEPAGEQK	3	GQDVVQEWQETSPT(UniMod:21)REEPAGEQK3
P06748	P06748;A0A7I2V5J8;E5RI98;A0A7I2V5S2	NPM_HUMAN	NPM1	Nucleophosmin	1	GQESFKK	GQES(UniMod:21)FKK	2	GQES(UniMod:21)FKK2		2.41215e+06	2.56845e+06
Q96JM3	Q96JM3	CHAP1_HUMAN	CHAMP1	Chromosome alignment-maintaining phosphoprotein 1	1	GQESSSDQEQVDVESIDFSK	GQESS(UniMod:21)S(UniMod:21)DQEQVDVESIDFSK	3	GQESS(UniMod:21)S(UniMod:21)DQEQVDVESIDFSK3	1.50543e+06	1.39757e+06	864672
Q96JM3	Q96JM3	CHAP1_HUMAN	CHAMP1	Chromosome alignment-maintaining phosphoprotein 1	1	GQESSSDQEQVDVESIDFSK	GQESS(UniMod:21)SDQEQVDVESIDFSK	3	GQESS(UniMod:21)SDQEQVDVESIDFSK3	109877	106697
P18206	P18206	VINC_HUMAN	VCL	Vinculin	1	GQGSSPVAMQK	GQGSS(UniMod:21)PVAMQK	2	GQGSS(UniMod:21)PVAMQK2	586509	518084	619916
Q5T5M9	Q5T5M9	CCNJ_HUMAN	CCNJ	Cyclin-J	1	GQSPQLSLR	GQSPQLS(UniMod:21)LR	2	GQSPQLS(UniMod:21)LR2		57788.9
Q9UQ35	Q9UQ35	SRRM2_HUMAN	SRRM2	Serine/arginine repetitive matrix protein 2	1	GQSQTSPDHRSDTSSPEVR	GQSQT(UniMod:21)SPDHRSDT(UniMod:21)SS(UniMod:21)PEVR	3	GQSQT(UniMod:21)SPDHRSDT(UniMod:21)SS(UniMod:21)PEVR3	567304	753944	662707
Q86VR2	Q86VR2;K7EQI9	RETR3_HUMAN	RETREG3	Reticulophagy regulator 3	1	GQTPLTEGSEDLDGHSDPEESFAR	GQTPLTEGS(UniMod:21)EDLDGHS(UniMod:21)DPEESFAR	3	GQTPLTEGS(UniMod:21)EDLDGHS(UniMod:21)DPEESFAR3	1.75573e+06	1.89864e+06	2.16902e+06
Q86VR2	Q86VR2;K7EQI9	RETR3_HUMAN	RETREG3	Reticulophagy regulator 3	1	GQTPLTEGSEDLDGHSDPEESFAR	GQTPLTEGS(UniMod:21)EDLDGHSDPEESFAR	3	GQTPLTEGS(UniMod:21)EDLDGHSDPEESFAR3	1.48871e+06	1.7979e+06	1.75738e+06
Q9NYF8	Q9NYF8;A0A1W2PQ43;E9PK91;E9PK09;E9PKI6;E9PQN2	BCLF1_HUMAN	BCLAF1	Bcl-2-associated transcription factor 1	1	GRAEGEWEDQEALDYFSDK	GRAEGEWEDQEALDYFS(UniMod:21)DK	3	GRAEGEWEDQEALDYFS(UniMod:21)DK3	625148	1.26668e+06	1.00533e+06
P54259	P54259	ATN1_HUMAN	ATN1	Atrophin-1	1	GRASPGGVSTSSSDGK	GRAS(UniMod:21)PGGVSTSSSDGK	2	GRAS(UniMod:21)PGGVSTSSSDGK2	667876	747882	665082
Q8IXQ4	Q8IXQ4;A0A0A0MRI1	GPAM1_HUMAN	GPALPP1	GPALPP motifs-containing protein 1	1	GRDDPGQQETDSSEDEDIIGPMPAK	GRDDPGQQET(UniMod:21)DS(UniMod:21)S(UniMod:21)EDEDIIGPMPAK	3	GRDDPGQQET(UniMod:21)DS(UniMod:21)S(UniMod:21)EDEDIIGPMPAK3	2.94233e+06	3.15046e+06	2.53862e+06
Q13242	Q13242	SRSF9_HUMAN	SRSF9	Serine/arginine-rich splicing factor 9	1	GRDSPYQSR	GRDS(UniMod:21)PYQSR	2	GRDS(UniMod:21)PYQSR2	1.81597e+06	1.95119e+06	2.08646e+06
Q9NTI5	Q9NTI5;A9IYQ1	PDS5B_HUMAN	PDS5B	Sister chromatid cohesion protein PDS5 homolog B	1	GRLDSSEMDHSENEDYTMSSPLPGK	GRLDS(UniMod:21)SEMDHS(UniMod:21)ENEDYTMSSPLPGK	3	GRLDS(UniMod:21)SEMDHS(UniMod:21)ENEDYTMSSPLPGK3	7.05612e+06	9.69669e+06	9.14794e+06
Q8WXI9	Q8WXI9;A0A0U1RR34;A0A0U1RRM1;A0A0U1RRK3	P66B_HUMAN	GATAD2B	Transcriptional repressor p66-beta	1	GRLTPSPDIIVLSDNEASSPR	GRLT(UniMod:21)PS(UniMod:21)PDIIVLSDNEASS(UniMod:21)PR	3	GRLT(UniMod:21)PS(UniMod:21)PDIIVLSDNEASS(UniMod:21)PR3	3.82968e+06	4.25802e+06	3.69998e+06
Q8WXI9	Q8WXI9;A0A0U1RR34;A0A0U1RRM1;A0A0U1RRK3	P66B_HUMAN	GATAD2B	Transcriptional repressor p66-beta	1	GRLTPSPDIIVLSDNEASSPR	GRLT(UniMod:21)PSPDIIVLSDNEAS(UniMod:21)SPR	3	GRLT(UniMod:21)PSPDIIVLSDNEAS(UniMod:21)SPR3	377628	485523	417249
Q9UQ35	Q9UQ35	SRRM2_HUMAN	SRRM2	Serine/arginine repetitive matrix protein 2	1	GRSECDSSPEPK	GRS(UniMod:21)EC(UniMod:4)DS(UniMod:21)S(UniMod:21)PEPK	2	GRS(UniMod:21)EC(UniMod:4)DS(UniMod:21)S(UniMod:21)PEPK2	2.37916e+06	3.36618e+06	3.19757e+06
Q9UQ35	Q9UQ35	SRRM2_HUMAN	SRRM2	Serine/arginine repetitive matrix protein 2	1	GRSECDSSPEPK	GRSEC(UniMod:4)DS(UniMod:21)S(UniMod:21)PEPK	2	GRSEC(UniMod:4)DS(UniMod:21)S(UniMod:21)PEPK2	1.85149e+06	1.93426e+06	1.84027e+06
P17612;P22694	P17612;P22694;P22612;B1APF9;A0A7I2V5J4;B1APG2;A0A087WVC4;K7ERP6;B7Z708;B1APG3;B1APF8;Q15136	KAPCA_HUMAN;KAPCB_HUMAN	PRKACA;PRKACB	cAMP-dependent protein kinase catalytic subunit alpha	0	GRTWTLCGTPEYLAPEIILSK	GRTWTLC(UniMod:4)GT(UniMod:21)PEYLAPEIILSK	3	GRTWTLC(UniMod:4)GT(UniMod:21)PEYLAPEIILSK3	797734	746426	768471
Q6PD62	Q6PD62	CTR9_HUMAN	CTR9	RNA polymerase-associated protein CTR9 homolog	1	GSGSEQEGEDEEGGER	GS(UniMod:21)GS(UniMod:21)EQEGEDEEGGER	2	GS(UniMod:21)GS(UniMod:21)EQEGEDEEGGER2	659811	807473	691639
Q8IZL8	Q8IZL8;C9JFV4;E7EV54	PELP1_HUMAN	PELP1	Proline-, glutamic acid- and leucine-rich protein 1	1	GSPDGSLQTGK	GS(UniMod:21)PDGSLQTGK	2	GS(UniMod:21)PDGSLQTGK2	59883.4
Q9H3H1	Q9H3H1;Q3T7B4	MOD5_HUMAN	TRIT1	tRNA dimethylallyltransferase	1	GSPGQNDQELK	GS(UniMod:21)PGQNDQELK	2	GS(UniMod:21)PGQNDQELK2	122147		135668
Q92945	Q92945;M0R0C6;M0R3J3	FUBP2_HUMAN	KHSRP	Far upstream element-binding protein 2	1	GSPQQIDHAK	GS(UniMod:21)PQQIDHAK	2	GS(UniMod:21)PQQIDHAK2	373716	420939	453262
Q14684	Q14684	RRP1B_HUMAN	RRP1B	Ribosomal RNA processing protein 1 homolog B	1	GSPTGGAQLLK	GS(UniMod:21)PTGGAQLLK	2	GS(UniMod:21)PTGGAQLLK2	594080	720190	611901
Q14195	Q14195;H0YBT4	DPYL3_HUMAN	DPYSL3	Dihydropyrimidinase-related protein 3	1	GSPTRPNPPVR	GS(UniMod:21)PTRPNPPVR	2	GS(UniMod:21)PTRPNPPVR2	1.00833e+07	1.12213e+07	9.34212e+06
Q6ZRV2	Q6ZRV2;A0A494C1T9;J3KPS2	FA83H_HUMAN	FAM83H	Protein FAM83H	1	GSPTSAYPER	GS(UniMod:21)PTSAYPER	2	GS(UniMod:21)PTSAYPER2	377524	370138	288461
Q9NYV4	Q9NYV4;J3QSD7	CDK12_HUMAN	CDK12	Cyclin-dependent kinase 12	1	GSPVFLPR	GS(UniMod:21)PVFLPR	2	GS(UniMod:21)PVFLPR2	1.13869e+06	1.20996e+06	1.52051e+06
Q86VQ1	Q86VQ1	GLCI1_HUMAN	GLCCI1	Glucocorticoid-induced transcript 1 protein	1	GSQHSPTRPPVAAAAASLGSLPGPGAAR	GS(UniMod:21)QHSPTRPPVAAAAASLGSLPGPGAAR	3	GS(UniMod:21)QHSPTRPPVAAAAASLGSLPGPGAAR3	1.51942e+06
Q9UN37	Q9UN37;I3L4J1	VPS4A_HUMAN	VPS4A	Vacuolar protein sorting-associated protein 4A	1	GSDSDSEGDNPEK	GSDS(UniMod:21)DSEGDNPEK	2	GSDS(UniMod:21)DSEGDNPEK2	956010	880118	861062
Q9UKJ3	Q9UKJ3	GPTC8_HUMAN	GPATCH8	G patch domain-containing protein 8	1	GSEGDCSPEDK	GSEGDC(UniMod:4)S(UniMod:21)PEDK	2	GSEGDC(UniMod:4)S(UniMod:21)PEDK2	129561	215435	154015
Q9Y2W1	Q9Y2W1;A0A3B3ITZ9	TR150_HUMAN	THRAP3	Thyroid hormone receptor-associated protein 3	1	GSFSDTGLGDGK	GSFS(UniMod:21)DTGLGDGK	2	GSFS(UniMod:21)DTGLGDGK2	3.71777e+06	4.66593e+06	4.77127e+06
Q9BSJ6	Q9BSJ6;I3L156;I3L419;I3L2R2	PIMRE_HUMAN	PIMREG	Protein PIMREG	1	GSGSPTHSLSQK	GSGS(UniMod:21)PTHSLSQK	2	GSGS(UniMod:21)PTHSLSQK2		1.11078e+06	1.16661e+06
Q7Z6Z7	Q7Z6Z7	HUWE1_HUMAN	HUWE1	E3 ubiquitin-protein ligase HUWE1	1	GSGTASDDEFENLR	GSGTAS(UniMod:21)DDEFENLR	2	GSGTAS(UniMod:21)DDEFENLR2	9.37978e+06	1.01535e+07	9.96612e+06
Q6VY07	Q6VY07	PACS1_HUMAN	PACS1	Phosphofurin acidic cluster sorting protein 1	1	GSGVAQSPQQPPPQQQQQQPPQQPTPPK	GSGVAQSPQQPPPQQQQQQPPQQPT(UniMod:21)PPK	3	GSGVAQSPQQPPPQQQQQQPPQQPT(UniMod:21)PPK3	242177	469142	612464
Q96AY4	Q96AY4;A0A087WW06	TTC28_HUMAN	TTC28	Tetratricopeptide repeat protein 28	1	GSISTPNSPVK	GSIS(UniMod:21)TPNS(UniMod:21)PVK	2	GSIS(UniMod:21)TPNS(UniMod:21)PVK2	1.15733e+06	1.49782e+06	1.22561e+06
Q3YEC7	Q3YEC7;G3V154	RABL6_HUMAN	RABL6	Rab-like protein 6	1	GSPPLPAGPVPSQDITLSSEEEAEVAAPTK	GSPPLPAGPVPSQDIT(UniMod:21)LS(UniMod:21)SEEEAEVAAPTK	3	GSPPLPAGPVPSQDIT(UniMod:21)LS(UniMod:21)SEEEAEVAAPTK3	355159	346310	209268
Q8TER5	Q8TER5;G3V5C1;G3V485;G3V3N2	ARH40_HUMAN	ARHGEF40	Rho guanine nucleotide exchange factor 40	1	GSPTDAEGSPGLSR	GSPTDAEGS(UniMod:21)PGLSR	2	GSPTDAEGS(UniMod:21)PGLSR2	444072	440914	495340
Q86VQ1	Q86VQ1	GLCI1_HUMAN	GLCCI1	Glucocorticoid-induced transcript 1 protein	1	GSQHSPTRPPVAAAAASLGSLPGPGAAR	GSQHS(UniMod:21)PTRPPVAAAAASLGSLPGPGAAR	3	GSQHS(UniMod:21)PTRPPVAAAAASLGSLPGPGAAR3	1.54071e+06	1.50197e+06	1.92519e+06
Q9UPQ0	Q9UPQ0;D6RD46;H0Y8P3;G5EA03;E9PDJ9;E7EPK0;D6RJ93;D6R8Y0;Q6NVB9	LIMC1_HUMAN	LIMCH1	LIM and calponin homology domains-containing protein 1	1	GSSDGRGSDSESDLPHR	GSS(UniMod:21)DGRGS(UniMod:21)DSESDLPHR	3	GSS(UniMod:21)DGRGS(UniMod:21)DSESDLPHR3	1.56857e+06	1.8288e+06	1.84596e+06
Q8NC56	Q8NC56;H7C2Z0	LEMD2_HUMAN	LEMD2	LEM domain-containing protein 2	1	GSSEEDEDARTPDR	GSS(UniMod:21)EEDEDARTPDR	2	GSS(UniMod:21)EEDEDARTPDR2	294872
Q9Y6D5	Q9Y6D5;A0A7P0T9L6;A0A7P0T9L9;A0A7P0Z446;A0A7P0T7Z2;A0A7P0TA34	BIG2_HUMAN	ARFGEF2	Brefeldin A-inhibited guanine nucleotide-exchange protein 2	1	GSSLSGTDDGAQEVVK	GSS(UniMod:21)LSGTDDGAQEVVK	2	GSS(UniMod:21)LSGTDDGAQEVVK2	1.82266e+06	1.93675e+06	2.04389e+06
Q9UPQ0	Q9UPQ0;D6RD46;H0Y8P3;G5EA03;E9PDJ9;E7EPK0;D6RJ93;D6R8Y0;Q6NVB9	LIMC1_HUMAN	LIMCH1	LIM and calponin homology domains-containing protein 1	1	GSSDGRGSDSESDLPHR	GSSDGRGS(UniMod:21)DSESDLPHR	3	GSSDGRGS(UniMod:21)DSESDLPHR3	9.30379e+06	9.02862e+06	9.00925e+06
Q9UHF7	Q9UHF7;H0YAV4;E5RFF3	TRPS1_HUMAN	TRPS1	Zinc finger transcription factor Trps1	1	GSSERGSPIEK	GSSERGS(UniMod:21)PIEK	2	GSSERGS(UniMod:21)PIEK2	577355	506589	225452
P11388	P11388	TOP2A_HUMAN	TOP2A	DNA topoisomerase 2-alpha	1	GSVPLSSSPPATHFPDETEITNPVPK	GSVPLSSS(UniMod:21)PPATHFPDETEITNPVPK	3	GSVPLSSS(UniMod:21)PPATHFPDETEITNPVPK3	1.29625e+07	1.50252e+07	1.29448e+07
O15027	O15027;A0A3F2YNZ0;F1T0I1;A0A3F2YNX0;A0A8I5KPG1	SC16A_HUMAN	SEC16A	Protein transport protein Sec16A	1	GSVSQPSTPSPPKPTGIFQTSANSSFEPVK	GSVSQPS(UniMod:21)T(UniMod:21)PS(UniMod:21)PPKPTGIFQTSANSSFEPVK	3	GSVSQPS(UniMod:21)T(UniMod:21)PS(UniMod:21)PPKPTGIFQTSANSSFEPVK3	3.38632e+06	3.94432e+06	3.78165e+06
O15027	O15027;A0A3F2YNZ0;F1T0I1;A0A3F2YNX0;A0A8I5KPG1	SC16A_HUMAN	SEC16A	Protein transport protein Sec16A	1	GSVSQPSTPSPPKPTGIFQTSANSSFEPVK	GSVSQPS(UniMod:21)TPS(UniMod:21)PPKPTGIFQTSANSSFEPVK	3	GSVSQPS(UniMod:21)TPS(UniMod:21)PPKPTGIFQTSANSSFEPVK3	1.14163e+06	1.10328e+06	1.27596e+06
Q9UDY2	Q9UDY2;A0A3B3IU51;A0A1B0GTW1;A0A3B3ITE1;A0A2R8YDH4;A0A3B3IS03	ZO2_HUMAN	TJP2	Tight junction protein ZO-2	1	GSYGSDAEEEEYR	GSYGS(UniMod:21)DAEEEEYR	2	GSYGS(UniMod:21)DAEEEEYR2	232988	296887	292341
Q9UDY2	Q9UDY2;A0A3B3IU51;A0A1B0GTW1;A0A3B3ITE1;A0A2R8YDH4;A0A3B3IS03	ZO2_HUMAN	TJP2	Tight junction protein ZO-2	1	GSYGSDAEEEEYRQQLSEHSK	GSYGS(UniMod:21)DAEEEEYRQQLSEHSK	3	GSYGS(UniMod:21)DAEEEEYRQQLSEHSK3	1.39627e+06	1.13491e+06	2.1197e+06
Q5QJE6	Q5QJE6;J3KP30;E9PRB3	TDIF2_HUMAN	DNTTIP2	Deoxynucleotidyltransferase terminal-interacting protein 2	1	GTEPSTDGETSEAESNYSVSEHHDTILR	GT(UniMod:21)EPSTDGETS(UniMod:21)EAESNYSVSEHHDTILR	3	GT(UniMod:21)EPSTDGETS(UniMod:21)EAESNYSVSEHHDTILR3	1.09095e+06	2.97102e+06	2.10454e+06
P52594	P52594;B8ZZY2;C9J2I0	AGFG1_HUMAN	AGFG1	Arf-GAP domain and FG repeat-containing protein 1	1	GTPSQSPVVGR	GT(UniMod:21)PSQS(UniMod:21)PVVGR	2	GT(UniMod:21)PSQS(UniMod:21)PVVGR2	2.02209e+06	2.57559e+06	2.34971e+06
Q6NXT4	Q6NXT4;B5MCR8	ZNT6_HUMAN	SLC30A6	Zinc transporter 6	1	GTDDLNPVTSTPAKPSSPPPEFSFNTPGK	GTDDLNPVTSTPAKPS(UniMod:21)SPPPEFSFNTPGK	3	GTDDLNPVTSTPAKPS(UniMod:21)SPPPEFSFNTPGK3	1.23662e+06	1.58686e+06	1.20443e+06
P16401	Q02539;P16403;P16401;P22492;P10412;P16402	H15_HUMAN	H1-5	Histone H1.5	0	GTGASGSFK	GTGASGS(UniMod:21)FK	2	GTGASGS(UniMod:21)FK2	475978	601147	484426
P48651	P48651	PTSS1_HUMAN	PTDSS1	Phosphatidylserine synthase 1	1	GTKGSEDSPPK	GTKGS(UniMod:21)EDS(UniMod:21)PPK	2	GTKGS(UniMod:21)EDS(UniMod:21)PPK2	1.12766e+06	1.66548e+06	1.49055e+06
Q9HCN4	Q9HCN4	GPN1_HUMAN	GPN1	GPN-loop GTPase 1	1	GTLDEEDEEADSDTDDIDHR	GTLDEEDEEADS(UniMod:21)DTDDIDHR	3	GTLDEEDEEADS(UniMod:21)DTDDIDHR3	3.34986e+06	3.24419e+06	2.95806e+06
Q14683	Q14683;A0A6Q8PHC3;V9GY57;G8JLG1	SMC1A_HUMAN	SMC1A	Structural maintenance of chromosomes protein 1A	1	GTMDDISQEEGSSQGEDSVSGSQR	GTMDDISQEEGSS(UniMod:21)QGEDSVSGSQR	3	GTMDDISQEEGSS(UniMod:21)QGEDSVSGSQR3	405146	491173	544730
P52594	P52594;B8ZZY2;C9J2I0	AGFG1_HUMAN	AGFG1	Arf-GAP domain and FG repeat-containing protein 1	1	GTPSQSPVVGR	GTPSQS(UniMod:21)PVVGR	2	GTPSQS(UniMod:21)PVVGR2	5.01679e+06	5.41096e+06	6.00972e+06
P21127;Q9UQ88	P21127;Q9UQ88;A0A0D9SEN2;A0A0D9SER5;A0A0D9SEI3;Q5QPR4;Q5QPR3	CD11A_HUMAN;CD11B_HUMAN	CDK11A;CDK11B	Cyclin-dependent kinase 11B	0	GTSPRPPEGGLGYSQLGDDDLK	GTS(UniMod:21)PRPPEGGLGYSQLGDDDLK	3	GTS(UniMod:21)PRPPEGGLGYSQLGDDDLK3	1.56518e+06	1.63798e+06	1.8035e+06
Q8N1F7	Q8N1F7;H3BVG0	NUP93_HUMAN	NUP93	Nuclear pore complex protein Nup93	1	GTSPSSSSRPQR	GTS(UniMod:21)PSSSSRPQR	2	GTS(UniMod:21)PSSSSRPQR2	5.47444e+06	7.40548e+06	6.88858e+06
Q8WUB8	Q8WUB8;S5FZ81	PHF10_HUMAN	PHF10	PHD finger protein 10	1	GTSDSSSGNVSEGESPPDSQEDSFQGR	GTSDSSSGNVS(UniMod:21)EGESPPDSQEDSFQGR	3	GTSDSSSGNVS(UniMod:21)EGESPPDSQEDSFQGR3	1.49268e+06	1.72713e+06	1.51957e+06
Q9Y4P8	Q9Y4P8	WIPI2_HUMAN	WIPI2	WD repeat domain phosphoinositide-interacting protein 2	1	GTYVPSSPTR	GTYVPSS(UniMod:21)PTR	2	GTYVPSS(UniMod:21)PTR2	915262	875733	1.06681e+06
Q9P2G1	Q9P2G1	AKIB1_HUMAN	ANKIB1	Ankyrin repeat and IBR domain-containing protein 1	1	GVAPADSPEAPR	GVAPADS(UniMod:21)PEAPR	2	GVAPADS(UniMod:21)PEAPR2	129040	153557	102403
P49959	P49959;F8W7U8	MRE11_HUMAN	MRE11	Double-strand break repair protein MRE11	1	GVDFESSEDDDDDPFMNTSSLRR	GVDFES(UniMod:21)S(UniMod:21)EDDDDDPFMNTSSLRR	3	GVDFES(UniMod:21)S(UniMod:21)EDDDDDPFMNTSSLRR3	6.17395e+06	6.23875e+06	5.47615e+06
Q8N122	Q8N122;I3L436	RPTOR_HUMAN	RPTOR	Regulatory-associated protein of mTOR	1	GVHIHQAGGSPPASSTSSSSLTNDVAK	GVHIHQAGGS(UniMod:21)PPASSTSSSSLTNDVAK	3	GVHIHQAGGS(UniMod:21)PPASSTSSSSLTNDVAK3	2.24386e+06	2.25748e+06	2.95212e+06
Q9UKV3	Q9UKV3;E7EQT4;G3V3B0;S4R3H4;G3V3T3	ACINU_HUMAN	ACIN1	Apoptotic chromatin condensation inducer in the nucleus	1	GVPAGNSDTEGGQPGR	GVPAGNS(UniMod:21)DTEGGQPGR	2	GVPAGNS(UniMod:21)DTEGGQPGR2	2.44404e+06	2.59871e+06	2.70618e+06
Q8TAD8	Q8TAD8	SNIP1_HUMAN	SNIP1	Smad nuclear-interacting protein 1	1	GVSRSPPK	GVS(UniMod:21)RS(UniMod:21)PPK	2	GVS(UniMod:21)RS(UniMod:21)PPK2	1.32036e+06
P04075	P04075;H3BR04;H3BQN4;H3BU78;H3BMQ8;J3KPS3;H3BPS8;H3BUH7	ALDOA_HUMAN	ALDOA	Fructose-bisphosphate aldolase A	1	GVVPLAGTNGETTTQGLDGLSER	GVVPLAGTNGET(UniMod:21)T(UniMod:21)TQGLDGLSER	3	GVVPLAGTNGET(UniMod:21)T(UniMod:21)TQGLDGLSER3	451626	506139	671698
Q01518	Q01518;Q5T0R9;Q5T0R7;Q5T0R4;Q5T0R2;Q5T0R8;Q5T0R6;Q5T0R1;Q5T0R5;Q5T0R3;Q5T0S3	CAP1_HUMAN	CAP1	Adenylyl cyclase-associated protein 1	1	GYADSPSK	GYADS(UniMod:21)PSK	2	GYADS(UniMod:21)PSK2	1.30133e+06	992325	1.00425e+06
Q9BZF1	Q9BZF1	OSBL8_HUMAN	OSBPL8	Oxysterol-binding protein-related protein 8	1	GYSSPEPDIQDSSGSEAQSVKPSTR	GYSS(UniMod:21)PEPDIQDS(UniMod:21)S(UniMod:21)GSEAQSVKPSTR	3	GYSS(UniMod:21)PEPDIQDS(UniMod:21)S(UniMod:21)GSEAQSVKPSTR3	1.47699e+06	1.32096e+06	1.46746e+06
Q5XKK7	Q5XKK7;H3BRU1;H3BM86;H3BPC2	F219B_HUMAN	FAM219B	Protein FAM219B	1	GYTALSQSPDENLVSLDSDSDGELGSR	GYTALSQSPDENLVS(UniMod:21)LDSDS(UniMod:21)DGELGSR	3	GYTALSQSPDENLVS(UniMod:21)LDSDS(UniMod:21)DGELGSR3	560642	612880	494944
Q92538	Q92538;A0A669KBG8;A0A7I2YQ79;A0A7I2V3Y5;A0A7I2V4K2;A0A669KB10;A0A7I2V452;A0A7I2V2L4;A0A7I2V2L5;A0A7I2V529;A0A7I2YQ65;A0A7I2V4N5;A0A7I2V514;A0A7I2YQM2;A0A7I2YQE0;A0A7P0RGV0;A0A7I2V5V9	GBF1_HUMAN	GBF1	Golgi-specific brefeldin A-resistance guanine nucleotide exchange factor 1	1	GYTSDSEVYTDHGRPGK	GYTS(UniMod:21)DSEVYTDHGRPGK	3	GYTS(UniMod:21)DSEVYTDHGRPGK3	2.16203e+06	1.96108e+06	2.46144e+06
Q15149	Q15149;A0A8I5KYZ1;A0A8I5KSD5;E9PMV1;A0A8I5KUE3;H0YDN1	PLEC_HUMAN	PLEC	Plectin	1	GYYSPYSVSGSGSTAGSR	GYYSPYSVSGSGSTAGS(UniMod:21)R	2	GYYSPYSVSGSGSTAGS(UniMod:21)R2	1.03611e+06	1.24247e+06	1.28763e+06
P13051	P13051	UNG_HUMAN	UNG	Uracil-DNA glycosylase	1	HAPSPEPAVQGTGVAGVPEESGDAAAIPAK	HAPS(UniMod:21)PEPAVQGTGVAGVPEESGDAAAIPAK	3	HAPS(UniMod:21)PEPAVQGTGVAGVPEESGDAAAIPAK3	4.09552e+06	4.42761e+06	4.49095e+06
P42167	P42167;G5E972;H0YJH7	LAP2B_HUMAN	TMPO	Lamina-associated polypeptide 2, isoforms beta/gamma	1	HASPILPITEFSDIPR	HAS(UniMod:21)PILPITEFSDIPR	3	HAS(UniMod:21)PILPITEFSDIPR3	646019	660160	595804
Q8TD19	Q8TD19;A0A7I2V5R1;G3V459;G3V2Z5;G3V5V0	NEK9_HUMAN	NEK9	Serine/threonine-protein kinase Nek9	1	HCDSINSDFGSESGGCGDSSPGPSASQGPR	HC(UniMod:4)DSINSDFGSESGGC(UniMod:4)GDSS(UniMod:21)PGPSASQGPR	3	HC(UniMod:4)DSINSDFGSESGGC(UniMod:4)GDSS(UniMod:21)PGPSASQGPR3	623523	882449	924418
Q5SW79	Q5SW79;H0Y2V6	CE170_HUMAN	CEP170	Centrosomal protein of 170 kDa	1	HDDGTQSDSENAGAHR	HDDGTQS(UniMod:21)DSENAGAHR	3	HDDGTQS(UniMod:21)DSENAGAHR3	427467	413174	328900
Q9BRD0	Q9BRD0	BUD13_HUMAN	BUD13	BUD13 homolog	1	HDSDTSPPRR	HDS(UniMod:21)DTS(UniMod:21)PPRR	2	HDS(UniMod:21)DTS(UniMod:21)PPRR2		1.23234e+06	1.49356e+06
Q9BRD0	Q9BRD0	BUD13_HUMAN	BUD13	BUD13 homolog	1	HDSPDPSPPRR	HDS(UniMod:21)PDPS(UniMod:21)PPRR	2	HDS(UniMod:21)PDPS(UniMod:21)PPRR2	466928	770603	854275
P31948	P31948;H0YGI8	STIP1_HUMAN	STIP1	Stress-induced-phosphoprotein 1	1	HDSPEDVK	HDS(UniMod:21)PEDVK	2	HDS(UniMod:21)PEDVK2	5.49187e+06	5.52721e+06	5.6325e+06
Q9BRD0	Q9BRD0	BUD13_HUMAN	BUD13	BUD13 homolog	1	HDTPDPSPLR	HDT(UniMod:21)PDPS(UniMod:21)PLR	2	HDT(UniMod:21)PDPS(UniMod:21)PLR2	1.51535e+06	1.73858e+06	1.64412e+06
Q9BRD0	Q9BRD0	BUD13_HUMAN	BUD13	BUD13 homolog	1	HDTPDSSPR	HDTPDSS(UniMod:21)PR	2	HDTPDSS(UniMod:21)PR2	176859	225204	209209
P98175	P98175	RBM10_HUMAN	RBM10	RNA-binding protein 10	1	HDYDDSSEEQSAEDSYEASPGSETQR	HDYDDSSEEQS(UniMod:21)AEDS(UniMod:21)Y(UniMod:21)EASPGSETQR	3	HDYDDSSEEQS(UniMod:21)AEDS(UniMod:21)Y(UniMod:21)EASPGSETQR3	122179	235960	250982
O75376	O75376;J3KS51;E7EVU5;E7EW50	NCOR1_HUMAN	NCOR1	Nuclear receptor corepressor 1	1	HEAPSSPISGQPCGDDQNASPSK	HEAPSS(UniMod:21)PISGQPC(UniMod:4)GDDQNAS(UniMod:21)PSK	3	HEAPSS(UniMod:21)PISGQPC(UniMod:4)GDDQNAS(UniMod:21)PSK3	812381	1.11072e+06	812601
O75592	O75592;A0A804HIR9;A0A804HL12;A0A804HJ25;A0A499FJI4;A0A804HKQ1	MYCB2_HUMAN	MYCBP2	E3 ubiquitin-protein ligase MYCBP2	1	HEDEQALLDQNSQTPPPSPFSVQAFNK	HEDEQALLDQNSQT(UniMod:21)PPPS(UniMod:21)PFSVQAFNK	3	HEDEQALLDQNSQT(UniMod:21)PPPS(UniMod:21)PFSVQAFNK3	576679	632912	737396
O75592	O75592;A0A804HIR9;A0A804HL12;A0A804HJ25;A0A499FJI4;A0A804HKQ1	MYCB2_HUMAN	MYCBP2	E3 ubiquitin-protein ligase MYCBP2	1	HEDEQALLDQNSQTPPPSPFSVQAFNK	HEDEQALLDQNSQT(UniMod:21)PPPSPFSVQAFNK	3	HEDEQALLDQNSQT(UniMod:21)PPPSPFSVQAFNK3	1.88378e+06	1.54958e+06	1.66949e+06
Q12888	Q12888;A6NNK5;C9JXV0	TP53B_HUMAN	TP53BP1	TP53-binding protein 1	1	HEEQSNEDIPIAEQSSK	HEEQS(UniMod:21)NEDIPIAEQSSK	3	HEEQS(UniMod:21)NEDIPIAEQSSK3	587195	714229	484786
Q01082	Q01082;A0A087WUZ3	SPTB2_HUMAN	SPTBN1	Spectrin beta chain, non-erythrocytic 1	1	HEVSASTQSTPASSR	HEVSASTQST(UniMod:21)PASSR	2	HEVSASTQST(UniMod:21)PASSR2	381898	405412	526488
Q6GYQ0	Q6GYQ0;H0YJB5;A0A1B0GUI1;A0A7P0TAR5	RGPA1_HUMAN	RALGAPA1	Ral GTPase-activating protein subunit alpha-1	1	HFSQSEETGNEVFGALNEEQPLPR	HFSQS(UniMod:21)EETGNEVFGALNEEQPLPR	3	HFSQS(UniMod:21)EETGNEVFGALNEEQPLPR3	1.28288e+06	1.30319e+06	1.25057e+06
Q9UQ35	Q9UQ35;I3L4D8;I3L182	SRRM2_HUMAN	SRRM2	Serine/arginine repetitive matrix protein 2	1	HGGSPQPLATTPLSQEPVNPPSEASPTR	HGGS(UniMod:21)PQPLATTPLSQEPVNPPS(UniMod:21)EAS(UniMod:21)PTR	3	HGGS(UniMod:21)PQPLATTPLSQEPVNPPS(UniMod:21)EAS(UniMod:21)PTR3	342321	532390
Q9UQ35	Q9UQ35;I3L4D8;I3L182	SRRM2_HUMAN	SRRM2	Serine/arginine repetitive matrix protein 2	1	HGGSPQPLATTPLSQEPVNPPSEASPTR	HGGS(UniMod:21)PQPLATTPLSQEPVNPPSEAS(UniMod:21)PTR	3	HGGS(UniMod:21)PQPLATTPLSQEPVNPPSEAS(UniMod:21)PTR3	6.67757e+06	8.80163e+06	7.66869e+06
Q58FG1	Q58FG1	HS904_HUMAN	HSP90AA4P	Putative heat shock protein HSP 90-alpha A4	1	HGLEVIYTIEPIDEYCVQQLK	HGLEVIYT(UniMod:21)IEPIDEYC(UniMod:4)VQQLK	3	HGLEVIYT(UniMod:21)IEPIDEYC(UniMod:4)VQQLK3	178515	225707	200683
Q96E09	Q96E09	PBIR1_HUMAN	PABIR1	PPP2R1A-PPP2R2A-interacting phosphatase regulator 1	1	HGLLLPASPVR	HGLLLPAS(UniMod:21)PVR	2	HGLLLPAS(UniMod:21)PVR2	1.04772e+06	1.11901e+06	1.04699e+06
P17987	P17987;E7EQR6;F5H282	TCPA_HUMAN	TCP1	T-complex protein 1 subunit alpha	1	HGSYEDAVHSGALND	HGS(UniMod:21)YEDAVHSGALND	2	HGS(UniMod:21)YEDAVHSGALND2	1.22372e+06	1.44319e+06	1.51148e+06
Q9Y2X7	Q9Y2X7;J3QRU8;A0A0C4DGN6;J3QL89	GIT1_HUMAN	GIT1	ARF GTPase-activating protein GIT1	1	HGSGADSDYENTQSGDPLLGLEGK	HGSGADS(UniMod:21)DYENT(UniMod:21)QSGDPLLGLEGK	3	HGSGADS(UniMod:21)DYENT(UniMod:21)QSGDPLLGLEGK3	136884	244876	108155
Q9BRD0	Q9BRD0	BUD13_HUMAN	BUD13	BUD13 homolog	1	HGTPDPSPRK	HGT(UniMod:21)PDPS(UniMod:21)PRK	2	HGT(UniMod:21)PDPS(UniMod:21)PRK2	922684	1.17631e+06	1.17731e+06
Q9NP61	Q9NP61	ARFG3_HUMAN	ARFGAP3	ADP-ribosylation factor GTPase-activating protein 3	1	HGTDLWLDSCVVPPLSPPPK	HGTDLWLDSC(UniMod:4)VVPPLS(UniMod:21)PPPK	3	HGTDLWLDSC(UniMod:4)VVPPLS(UniMod:21)PPPK3	141130	237378	182550
P33527	P33527;A0A7I2V2E0;A0A0A0MS99;I3L4X2	MRP1_HUMAN	ABCC1	Multidrug resistance-associated protein 1	1	HHNSTAELQK	HHNS(UniMod:21)TAELQK	3	HHNS(UniMod:21)TAELQK3	1.40325e+06	1.16853e+06	1.07373e+06
Q9Y2X3	Q9Y2X3	NOP58_HUMAN	NOP58	Nucleolar protein 58	1	HIKEEPLSEEEPCTSTAIASPEK	HIKEEPLS(UniMod:21)EEEPC(UniMod:4)TSTAIAS(UniMod:21)PEK	3	HIKEEPLS(UniMod:21)EEEPC(UniMod:4)TSTAIAS(UniMod:21)PEK3	1.69873e+07	2.09928e+07	2.10026e+07
Q9Y2X3	Q9Y2X3	NOP58_HUMAN	NOP58	Nucleolar protein 58	1	HIKEEPLSEEEPCTSTAIASPEK	HIKEEPLS(UniMod:21)EEEPC(UniMod:4)TSTAIASPEK	3	HIKEEPLS(UniMod:21)EEEPC(UniMod:4)TSTAIASPEK3	1.03764e+07	1.01003e+07	1.18744e+07
[truncated: 1,401 more rows]

## Sheet: 100000cells
Protein.Group	Protein.Ids	Protein.Names	Genes	First.Protein.Description	Proteotypic	Stripped.Sequence	Modified.Sequence	Precursor.Charge	Precursor.Id	F:\WUCI\1E5_DIA-1_20250426104424.raw	F:\WUCI\1E5_DIA-2_20250426123225.raw	F:\WUCI\1E5_DIA-3.raw
[truncated: 2,229 more rows]
