# Supplementary material for: Unlocking Ultrasensitive Phosphoproteomics of Nanoscale Samples: A Rapid IMAC Enrichment Platform Using Ti-PAN Tip
Source: Research Square preprint supplement (doi:10.21203/rs.3.rs-8623740/v1), 2026-01-28
Supplement: Supplementary file 6 [file 5e3b5b2e51a1697fcf4185ec.xlsx]

## Sheet: 1000cells_1_MSFragger
Peptide Sequence	Modified Sequence	Prev AA	Next AA	Start	End	Peptide Length	Charges	Assigned Modifications	Protein	Protein ID	Entry Name	Gene	Protein Description	Mapped Genes	Mapped Proteins	cell_2 Spectral Count	cell_2 Intensity	cell_2 Match Type	cell_2 Localization
AAAAAPASEDEDDEDDEDDEDDDDDEEDDSEEEAMETTPAK	AAAAAPAS[79.9663]EDEDDEDDEDDEDDDDDEEDDSEEEAMET[79.9663]TPAK	K	G	177	217	41	4	37T(79.9663),8S(79.9663)	sp|P19338|NUCL_HUMAN	P19338	NUCL_HUMAN	NCL	Nucleolin			1	0	MS/MS	STY:79.9663@AAAAAPAS(0.6311)EDEDDEDDEDDEDDDDDEEDDS(0.1963)EEEAMET(0.5863)T(0.5863)PAK;
AAAAAPASEDEDDEDDEDDEDDDDDEEDDSEEEAMETTPAK	AAAAAPAS[79.9663]EDEDDEDDEDDEDDDDDEEDDS[79.9663]EEEAMETTPAK	K	G	177	217	41	4	30S(79.9663),8S(79.9663)	sp|P19338|NUCL_HUMAN	P19338	NUCL_HUMAN	NCL	Nucleolin			4	6.1961376E7	MS/MS	STY:79.9663@AAAAAPAS(0.9054)EDEDDEDDEDDEDDDDDEEDDS(0.9056)EEEAMET(0.1171)T(0.0719)PAK;
AAAAAPASEDEDDEDDEDDEDDDDDEEDDSEEEAMETTPAK	AAAAAPAS[79.9663]EDEDDEDDEDDEDDDDDEEDDS[79.9663]EEEAM[15.9949]ETTPAK	K	G	177	217	41	4	30S(79.9663),35M(15.9949),8S(79.9663)	sp|P19338|NUCL_HUMAN	P19338	NUCL_HUMAN	NCL	Nucleolin			1	9511475	MS/MS	STY:79.9663@AAAAAPAS(0.7916)EDEDDEDDEDDEDDDDDEEDDS(0.7916)EEEAMET(0.2084)T(0.2084)PAK;M:15.9949@AAAAAPASEDEDDEDDEDDEDDDDDEEDDSEEEAM(1.0000)ETTPAK;
AADPPAENSSAPEAEQGGAE	AADPPAENS[79.9663]SAPEAEQGGAE	K	-	305	324	20	2	9S(79.9663)	sp|P67809|YBOX1_HUMAN	P67809	YBOX1_HUMAN	YBX1	Y-box-binding protein 1			3	1.1706524E7	MS/MS	STY:79.9663@AADPPAENS(0.7943)S(0.2057)APEAEQGGAE;
AADRLPNLSSPSAEGPPGPPSGPAPR	AADRLPNLSSPSAEGPPGPPS[79.9663]GPAPR	K	K	454	479	26	3	21S(79.9663)	sp|O60784-2|TOM1_HUMAN	O60784-2	TOM1_HUMAN	TOM1	Isoform 2 of Target of Myb1 membrane trafficking protein		sp|O60784-3|TOM1_HUMAN, sp|O60784-4|TOM1_HUMAN, sp|O60784|TOM1_HUMAN	1	1.89458e+06	MS/MS	STY:79.9663@AADRLPNLS(0.1204)S(0.1204)PS(0.1204)AEGPPGPPS(0.6387)GPAPR;
AADRLPNLSSPSAEGPPGPPSGPAPR	AADRLPNLS[79.9663]SPSAEGPPGPPSGPAPR	K	K	454	479	26	3	9S(79.9663)	sp|O60784-2|TOM1_HUMAN	O60784-2	TOM1_HUMAN	TOM1	Isoform 2 of Target of Myb1 membrane trafficking protein		sp|O60784-3|TOM1_HUMAN, sp|O60784-4|TOM1_HUMAN, sp|O60784|TOM1_HUMAN	2	4.09184e+06	MS/MS	STY:79.9663@AADRLPNLS(0.8145)S(0.0825)PS(0.0825)AEGPPGPPS(0.0206)GPAPR;
AADSDDGAVSAPAASDGGVSK	AADS[79.9663]DDGAVSAPAASDGGVSK	M	S	2	22	21	2	4S(79.9663)	sp|Q96GM8|TOE1_HUMAN	Q96GM8	TOE1_HUMAN	TOE1	Target of EGR1 protein 1			2	0	MS/MS	STY:79.9663@AADS(0.9192)DDGAVS(0.0285)APAAS(0.0262)DGGVS(0.0262)K;
AAESETPGKSPEK	AAES[79.9663]ETPGKSPEK	K	K	198	210	13	2	4S(79.9663)	sp|O76021-2|RL1D1_HUMAN	O76021-2	RL1D1_HUMAN	RSL1D1	Isoform 2 of Ribosomal L1 domain-containing protein 1		sp|O76021|RL1D1_HUMAN	1	2.26765e+06	MS/MS	STY:79.9663@AAES(0.3333)ET(0.3333)PGKS(0.3333)PEK;
AAFDDAIAELDTLSEESYK	AAFDDAIAELDT[79.9663]LSEESYK	K	D	197	215	19	2	12T(79.9663)	sp|P62258|1433E_HUMAN	P62258	1433E_HUMAN	YWHAE	14-3-3 protein epsilon		sp|P62258-2|1433E_HUMAN	1	6449526	MS/MS	STY:79.9663@AAFDDAIAELDT(0.4864)LS(0.4864)EES(0.0136)Y(0.0136)K;
AAFTTPDHAPLSPQSSVASSGSEQTEEQGSSR	AAFT[79.9663]TPDHAPLSPQSSVASSGSEQTEEQGSSR	R	N	260	291	32	3	4T(79.9663)	sp|Q5PRF9|SMAG2_HUMAN	Q5PRF9	SMAG2_HUMAN	SAMD4B	Protein Smaug homolog 2			1	2318418	MS/MS	STY:79.9663@AAFT(0.1382)T(0.1382)PDHAPLS(0.1382)PQS(0.1382)S(0.1382)VAS(0.1382)S(0.1382)GS(0.0082)EQT(0.0082)EEQGS(0.0082)S(0.0082)R;
AAIPPPVYEEQDRPRSPTGPSNSFLANMGGTVAHK	AAIPPPVY[79.9663]EEQDRPRSPTGPSNSFLANMGGTVAHK	K	I	207	241	35	4,5	8Y(79.9663)	sp|Q96I25|SPF45_HUMAN	Q96I25	SPF45_HUMAN	RBM17	Splicing factor 45			2	1.8951016E7	MS/MS	STY:79.9663@AAIPPPVY(0.4241)EEQDRPRS(0.3931)PT(0.0727)GPS(0.0345)NS(0.0345)FLANMGGT(0.0410)VAHK;
AAKLSEGSQPAEEEEDQETPSR	AAKLS[79.9663]EGSQPAEEEEDQETPSR	R	N	236	257	22	3	5S(79.9663)	sp|Q9UKV3-5|ACINU_HUMAN	Q9UKV3-5	ACINU_HUMAN	ACIN1	Isoform 4 of Apoptotic chromatin condensation inducer in the nucleus		sp|Q9UKV3|ACINU_HUMAN	1	0	MS/MS	STY:79.9663@AAKLS(0.8472)EGS(0.0873)QPAEEEEDQET(0.0327)PS(0.0327)R;
AAKNSEEEEEEK	AAKNS[79.9663]EEEEEEK	K	K	569	580	12	2	5S(79.9663)	sp|Q14978-2|NOLC1_HUMAN	Q14978-2	NOLC1_HUMAN	NOLC1	Isoform Beta of Nucleolar and coiled-body phosphoprotein 1		sp|Q14978-3|NOLC1_HUMAN, sp|Q14978|NOLC1_HUMAN	3	5697163	MS/MS	STY:79.9663@AAKNS(1.0000)EEEEEEK;
AAKNSEEEEEEKK	AAKNS[79.9663]EEEEEEKK	K	K	569	581	13	3	5S(79.9663)	sp|Q14978-2|NOLC1_HUMAN	Q14978-2	NOLC1_HUMAN	NOLC1	Isoform Beta of Nucleolar and coiled-body phosphoprotein 1		sp|Q14978-3|NOLC1_HUMAN, sp|Q14978|NOLC1_HUMAN	1	2.00669e+06	MS/MS	STY:79.9663@AAKNS(1.0000)EEEEEEKK;
AALAPAKESPRK	AALAPAKES[79.9663]PRK	R	G	898	909	12	3	9S(79.9663)	sp|Q13428-6|TCOF_HUMAN	Q13428-6	TCOF_HUMAN	TCOF1	Isoform 6 of Treacle protein		sp|Q13428-2|TCOF_HUMAN, sp|Q13428-3|TCOF_HUMAN, sp|Q13428-4|TCOF_HUMAN, sp|Q13428-5|TCOF_HUMAN, sp|Q13428-7|TCOF_HUMAN, sp|Q13428-8|TCOF_HUMAN, sp|Q13428|TCOF_HUMAN	1	0	MS/MS	STY:79.9663@AALAPAKES(1.0000)PRK;
AALLAQYADVTDEEDEADEK	AALLAQY[79.9663]ADVTDEEDEADEK	K	D	129	148	20	2	7Y(79.9663)	sp|Q96MW1|CCD43_HUMAN	Q96MW1	CCD43_HUMAN	CCDC43	Coiled-coil domain-containing protein 43			1	0	MS/MS	STY:79.9663@AALLAQY(0.5000)ADVT(0.5000)DEEDEADEK;
AALLAQYADVTDEEDEADEKDDSGATTMNIGSDK	AALLAQY[79.9663]ADVTDEEDEADEKDDSGATTMNIGSDK	K	L	129	162	34	3	7Y(79.9663)	sp|Q96MW1|CCD43_HUMAN	Q96MW1	CCD43_HUMAN	CCDC43	Coiled-coil domain-containing protein 43			1	0	MS/MS	STY:79.9663@AALLAQY(0.2433)ADVT(0.2433)DEEDEADEKDDS(0.2433)GAT(0.2433)T(0.0119)MNIGS(0.0150)DK;
AALLKASPK	AALLKAS[79.9663]PK	K	K	133	141	9	2	7S(79.9663)	sp|P50914|RL14_HUMAN	P50914	RL14_HUMAN	RPL14	Large ribosomal subunit protein eL14			1	0	MS/MS	STY:79.9663@AALLKAS(1.0000)PK;
AAPEASSPPASPLQHLLPGK	AAPEAS[79.9663]SPPASPLQHLLPGK	K	A	673	692	20	3	6S(79.9663)	sp|Q96TA1-2|NIBA2_HUMAN	Q96TA1-2	NIBA2_HUMAN	NIBAN2	Isoform 2 of Protein Niban 2		sp|Q96TA1|NIBA2_HUMAN	2	4481009	MS/MS	STY:79.9663@AAPEAS(0.4809)S(0.4809)PPAS(0.0382)PLQHLLPGK;
AAPEASSPPASPLQHLLPGK	AAPEAS[79.9663]S[79.9663]PPASPLQHLLPGK	K	A	673	692	20	3	6S(79.9663),7S(79.9663)	sp|Q96TA1-2|NIBA2_HUMAN	Q96TA1-2	NIBA2_HUMAN	NIBAN2	Isoform 2 of Protein Niban 2		sp|Q96TA1|NIBA2_HUMAN	1	2.386267E7	MS/MS	STY:79.9663@AAPEAS(0.6667)S(0.6667)PPAS(0.6667)PLQHLLPGK;
AASAPAKESPRK	AASAPAKES[79.9663]PRK	R	G	438	449	12	2	9S(79.9663)	sp|Q13428-6|TCOF_HUMAN	Q13428-6	TCOF_HUMAN	TCOF1	Isoform 6 of Treacle protein		sp|Q13428-2|TCOF_HUMAN, sp|Q13428-3|TCOF_HUMAN, sp|Q13428-4|TCOF_HUMAN, sp|Q13428-5|TCOF_HUMAN, sp|Q13428-7|TCOF_HUMAN, sp|Q13428-8|TCOF_HUMAN, sp|Q13428|TCOF_HUMAN	1	0	MS/MS	STY:79.9663@AAS(0.0870)APAKES(0.9130)PRK;
AASPSPQSVR	AASPS[79.9663]PQSVR	K	R	736	745	10	2	5S(79.9663)	sp|Q8IYB3|SRRM1_HUMAN	Q8IYB3	SRRM1_HUMAN	SRRM1	Serine/arginine repetitive matrix protein 1		sp|Q8IYB3-2|SRRM1_HUMAN	2	9261676	MS/MS	STY:79.9663@AAS(0.0470)PS(0.9185)PQS(0.0345)VR;
AASSDQLRDNSPPPAFKPEPPK	AASS[79.9663]DQLRDNSPPPAFKPEPPK	R	A	953	974	22	3	4S(79.9663)	sp|Q9UDY2-3|ZO2_HUMAN	Q9UDY2-3	ZO2_HUMAN	TJP2	Isoform C1 of Tight junction protein ZO-2		sp|Q9UDY2-7|ZO2_HUMAN, sp|Q9UDY2|ZO2_HUMAN	1	2.77958e+06	MS/MS	STY:79.9663@AAS(0.0600)S(0.4700)DQLRDNS(0.4700)PPPAFKPEPPK;
AASPPASASDLIEQQQK	AAS[79.9663]PPASASDLIEQQQK	R	R	333	349	17	2	3S(79.9663)	sp|Q5VSL9|STRP1_HUMAN	Q5VSL9	STRP1_HUMAN	STRIP1	Striatin-interacting protein 1		sp|Q5VSL9-2|STRP1_HUMAN, sp|Q5VSL9-3|STRP1_HUMAN	3	4058176	MS/MS	STY:79.9663@AAS(0.9160)PPAS(0.0490)AS(0.0350)DLIEQQQK;
AASPSPQSVR	AAS[79.9663]PSPQSVR	K	R	736	745	10	2	3S(79.9663)	sp|Q8IYB3|SRRM1_HUMAN	Q8IYB3	SRRM1_HUMAN	SRRM1	Serine/arginine repetitive matrix protein 1		sp|Q8IYB3-2|SRRM1_HUMAN	3	1.321721E7	MS/MS	STY:79.9663@AAS(0.8885)PS(0.0557)PQS(0.0557)VR;
AASPSPQSVR	AAS[79.9663]PS[79.9663]PQSVR	K	R	736	745	10	2	3S(79.9663),5S(79.9663)	sp|Q8IYB3|SRRM1_HUMAN	Q8IYB3	SRRM1_HUMAN	SRRM1	Serine/arginine repetitive matrix protein 1		sp|Q8IYB3-2|SRRM1_HUMAN	5	1.3941838E7	MS/MS	STY:79.9663@AAS(0.9440)PS(0.9440)PQS(0.1119)VR;
AASSSSPGSPVASSPSR	AAS[79.9663]S[79.9663]SSPGSPVASSPSR	R	L	1773	1789	17	2	3S(79.9663),4S(79.9663)	sp|Q92538-2|GBF1_HUMAN	Q92538-2	GBF1_HUMAN	GBF1	Isoform 2 of Golgi-specific brefeldin A-resistance guanine nucleotide exchange factor 1		sp|Q92538-3|GBF1_HUMAN, sp|Q92538|GBF1_HUMAN	1	0	MS/MS	STY:79.9663@AAS(0.2500)S(0.2500)S(0.2500)S(0.2500)PGS(0.2500)PVAS(0.2500)S(0.2500)PS(0.2500)R;
AAVLSDSEDEEK	AAVLS[79.9663]DSEDEEK	K	A	187	198	12	2	5S(79.9663)	sp|Q96ST2-3|IWS1_HUMAN	Q96ST2-3	IWS1_HUMAN	IWS1	Isoform 3 of Protein IWS1 homolog		sp|Q96ST2-2|IWS1_HUMAN, sp|Q96ST2|IWS1_HUMAN	1	0	MS/MS	STY:79.9663@AAVLS(0.5000)DS(0.5000)EDEEK;
AAVLSDSEDEEK	AAVLS[79.9663]DS[79.9663]EDEEK	K	A	187	198	12	2	5S(79.9663),7S(79.9663)	sp|Q96ST2-3|IWS1_HUMAN	Q96ST2-3	IWS1_HUMAN	IWS1	Isoform 3 of Protein IWS1 homolog		sp|Q96ST2-2|IWS1_HUMAN, sp|Q96ST2|IWS1_HUMAN	1	7.31602e+06	MS/MS	STY:79.9663@AAVLS(1.0000)DS(1.0000)EDEEK;
ADAPDAGAQSDSELPSYHQNDVSLDR	ADAPDAGAQSDSELPS[79.9663]YHQNDVSLDR	R	G	1290	1315	26	3	16S(79.9663)	sp|Q92538-2|GBF1_HUMAN	Q92538-2	GBF1_HUMAN	GBF1	Isoform 2 of Golgi-specific brefeldin A-resistance guanine nucleotide exchange factor 1		sp|Q92538-3|GBF1_HUMAN, sp|Q92538|GBF1_HUMAN	1	1.0528488E7	MS/MS	STY:79.9663@ADAPDAGAQS(0.0767)DS(0.0767)ELPS(0.8087)Y(0.0225)HQNDVS(0.0155)LDR;
ADAPDAGAQSDSELPSYHQNDVSLDR	ADAPDAGAQS[79.9663]DSELPSYHQNDVSLDR	R	G	1290	1315	26	3	10S(79.9663)	sp|Q92538-2|GBF1_HUMAN	Q92538-2	GBF1_HUMAN	GBF1	Isoform 2 of Golgi-specific brefeldin A-resistance guanine nucleotide exchange factor 1		sp|Q92538-3|GBF1_HUMAN, sp|Q92538|GBF1_HUMAN	1	1.0964576E7	MS/MS	STY:79.9663@ADAPDAGAQS(0.3105)DS(0.3105)ELPS(0.3105)Y(0.0129)HQNDVS(0.0556)LDR;
ADDFPVRDDPSDVTDEDEGPAEPPPPPK	ADDFPVRDDPS[79.9663]DVT[79.9663]DEDEGPAEPPPPPK	R	L	587	614	28	3	11S(79.9663),14T(79.9663)	sp|Q3YEC7-2|RABL6_HUMAN	Q3YEC7-2	RABL6_HUMAN	RABL6	Isoform 2 of Rab-like protein 6		sp|Q3YEC7|RABL6_HUMAN	1	4.36786e+06	MS/MS	STY:79.9663@ADDFPVRDDPS(1.0000)DVT(1.0000)DEDEGPAEPPPPPK;
ADEASELACPTPKEDGLAQQQTQLNLR	ADEASELAC[57.0215]PT[79.9663]PKEDGLAQQQTQLNLR	K	S	2194	2220	27	3	11T(79.9663),9C(57.0215)	sp|P49327|FAS_HUMAN	P49327	FAS_HUMAN	FASN	Fatty acid synthase			1	4395263	MS/MS	STY:79.9663@ADEAS(0.0407)ELACPT(0.9245)PKEDGLAQQQT(0.0348)QLNLR;
ADEASELACPTPK	ADEAS[79.9663]ELAC[57.0215]PTPK	K	E	2194	2206	13	2	5S(79.9663),9C(57.0215)	sp|P49327|FAS_HUMAN	P49327	FAS_HUMAN	FASN	Fatty acid synthase			1	0	MS/MS	STY:79.9663@ADEAS(0.5000)ELACPT(0.5000)PK;
ADEASELACPTPKEDGLAQQQTQLNLR	ADEAS[79.9663]ELAC[57.0215]PTPKEDGLAQQQTQLNLR	K	S	2194	2220	27	3	5S(79.9663),9C(57.0215)	sp|P49327|FAS_HUMAN	P49327	FAS_HUMAN	FASN	Fatty acid synthase			1	4395263	MS/MS	STY:79.9663@ADEAS(0.3333)ELACPT(0.3333)PKEDGLAQQQT(0.3333)QLNLR;
ADEPSSEESDLEIDK	ADEPSS[79.9663]EES[79.9663]DLEIDK	K	E	71	85	15	2	6S(79.9663),9S(79.9663)	sp|P50502|F10A1_HUMAN	P50502	F10A1_HUMAN	ST13	Hsc70-interacting protein	ST13P4	sp|Q8IZP2|ST134_HUMAN	2	2.7989318E7	MS/MS	STY:79.9663@ADEPS(0.1821)S(0.9090)EES(0.9090)DLEIDK;
ADEPSSEESDLEIDK	ADEPS[79.9663]SEESDLEIDK	K	E	71	85	15	2	5S(79.9663)	sp|P50502|F10A1_HUMAN	P50502	F10A1_HUMAN	ST13	Hsc70-interacting protein	ST13P4	sp|Q8IZP2|ST134_HUMAN	1	1.70467e+06	MS/MS	STY:79.9663@ADEPS(0.3333)S(0.3333)EES(0.3333)DLEIDK;
ADEPSSEESDLEIDK	ADEPS[79.9663]SEES[79.9663]DLEIDK	K	E	71	85	15	2	5S(79.9663),9S(79.9663)	sp|P50502|F10A1_HUMAN	P50502	F10A1_HUMAN	ST13	Hsc70-interacting protein	ST13P4	sp|Q8IZP2|ST134_HUMAN	3	2.807223E7	MS/MS	STY:79.9663@ADEPS(0.6576)S(0.6576)EES(0.6848)DLEIDK;
ADEPSSEESDLEIDK	ADEPS[79.9663]S[79.9663]EESDLEIDK	K	E	71	85	15	2	5S(79.9663),6S(79.9663)	sp|P50502|F10A1_HUMAN	P50502	F10A1_HUMAN	ST13	Hsc70-interacting protein	ST13P4	sp|Q8IZP2|ST134_HUMAN	4	2.807223E7	MS/MS	STY:79.9663@ADEPS(0.7523)S(0.7523)EES(0.4954)DLEIDK;
ADEPSSEESDLEIDK	ADEPS[79.9663]S[79.9663]EES[79.9663]DLEIDK	K	E	71	85	15	2	5S(79.9663),6S(79.9663),9S(79.9663)	sp|P50502|F10A1_HUMAN	P50502	F10A1_HUMAN	ST13	Hsc70-interacting protein	ST13P4	sp|Q8IZP2|ST134_HUMAN	21	1.0057336E8	MS/MS	STY:79.9663@ADEPS(1.0000)S(1.0000)EES(1.0000)DLEIDK;
ADVQLFMDDDSYSHHSGLEYADPEK	ADVQLFMDDDSY[79.9663]SHHSGLEY[79.9663]ADPEK	K	F	8	32	25	3	12Y(79.9663),20Y(79.9663)	sp|P51636-3|CAV2_HUMAN	P51636-3	CAV2_HUMAN	CAV2	Isoform C of Caveolin-2		sp|P51636|CAV2_HUMAN	1	0	MS/MS	STY:79.9663@ADVQLFMDDDS(0.0756)Y(0.4677)S(0.4677)HHS(0.4677)GLEY(0.5214)ADPEK;
ADVQLFMDDDSYSHHSGLEYADPEK	ADVQLFMDDDSY[79.9663]S[79.9663]HHSGLEYADPEK	K	F	8	32	25	3	12Y(79.9663),13S(79.9663)	sp|P51636-3|CAV2_HUMAN	P51636-3	CAV2_HUMAN	CAV2	Isoform C of Caveolin-2		sp|P51636|CAV2_HUMAN	1	1.1911967E7	MS/MS	STY:79.9663@ADVQLFMDDDS(0.1639)Y(0.4957)S(0.4468)HHS(0.4468)GLEY(0.4468)ADPEK;
ADVQLFMDDDSYSHHSGLEYADPEK	ADVQLFMDDDS[79.9663]Y[79.9663]SHHSGLEYADPEK	K	F	8	32	25	3	11S(79.9663),12Y(79.9663)	sp|P51636-3|CAV2_HUMAN	P51636-3	CAV2_HUMAN	CAV2	Isoform C of Caveolin-2		sp|P51636|CAV2_HUMAN	2	1.1911967E7	MS/MS	STY:79.9663@ADVQLFMDDDS(0.4716)Y(0.4716)S(0.4716)HHS(0.4716)GLEY(0.1136)ADPEK;
AEALMRELDEEGSDPPLPGR	AEALMRELDEEGS[79.9663]DPPLPGR	K	A	163	182	20	3	13S(79.9663)	sp|Q9BRJ6|CG050_HUMAN	Q9BRJ6	CG050_HUMAN	C7orf50	Uncharacterized protein C7orf50			1	0	MS/MS	STY:79.9663@AEALMRELDEEGS(1.0000)DPPLPGR;
AEAPLPSPK	AEAPLPS[79.9663]PK	K	L	5104	5112	9	2	7S(79.9663)	sp|Q09666|AHNK_HUMAN	Q09666	AHNK_HUMAN	AHNAK	Neuroblast differentiation-associated protein AHNAK			3	2474615	MS/MS	STY:79.9663@AEAPLPS(1.0000)PK;
AEDGATPSPSNETPK	AEDGATPSPSNET[79.9663]PK	K	K	138	152	15	2	13T(79.9663)	sp|P29966|MARCS_HUMAN	P29966	MARCS_HUMAN	MARCKS	Myristoylated alanine-rich C-kinase substrate			2	1.0751835E7	MS/MS	STY:79.9663@AEDGAT(0.0639)PS(0.0639)PS(0.0639)NET(0.8083)PK;
AEDGATPSPSNETPK	AEDGATPSPS[79.9663]NETPK	K	K	138	152	15	2	10S(79.9663)	sp|P29966|MARCS_HUMAN	P29966	MARCS_HUMAN	MARCKS	Myristoylated alanine-rich C-kinase substrate			2	1.880405E7	MS/MS	STY:79.9663@AEDGAT(0.0443)PS(0.0443)PS(0.8413)NET(0.0702)PK;
AEDGATPSPSNETPKK	AEDGATPSPS[79.9663]NETPKK	K	K	138	153	16	2	10S(79.9663)	sp|P29966|MARCS_HUMAN	P29966	MARCS_HUMAN	MARCKS	Myristoylated alanine-rich C-kinase substrate			1	4627880	MS/MS	STY:79.9663@AEDGAT(0.0372)PS(0.0372)PS(0.4628)NET(0.4628)PKK;
AEDGATPSPSNETPK	AEDGATPS[79.9663]PSNETPK	K	K	138	152	15	2	8S(79.9663)	sp|P29966|MARCS_HUMAN	P29966	MARCS_HUMAN	MARCKS	Myristoylated alanine-rich C-kinase substrate			3	1.2749076E7	MS/MS	STY:79.9663@AEDGAT(0.0131)PS(0.3290)PS(0.3290)NET(0.3290)PK;
AEDGATPSPSNETPK	AEDGAT[79.9663]PSPSNETPK	K	K	138	152	15	2	6T(79.9663)	sp|P29966|MARCS_HUMAN	P29966	MARCS_HUMAN	MARCKS	Myristoylated alanine-rich C-kinase substrate			3	8.05221e+06	MS/MS	STY:79.9663@AEDGAT(0.2500)PS(0.2500)PS(0.2500)NET(0.2500)PK;
AEDGATPSPSNETPKK	AEDGAT[79.9663]PSPSNETPKK	K	K	138	153	16	2	6T(79.9663)	sp|P29966|MARCS_HUMAN	P29966	MARCS_HUMAN	MARCKS	Myristoylated alanine-rich C-kinase substrate			4	7449510	MS/MS	STY:79.9663@AEDGAT(0.2500)PS(0.2500)PS(0.2500)NET(0.2500)PKK;
AEDSDSEPEPEDNVR	AEDS[79.9663]DS[79.9663]EPEPEDNVR	K	L	420	434	15	2	4S(79.9663),6S(79.9663)	sp|Q9H0D6-2|XRN2_HUMAN	Q9H0D6-2	XRN2_HUMAN	XRN2	Isoform 2 of 5'-3' exoribonuclease 2		sp|Q9H0D6|XRN2_HUMAN	1	0	MS/MS	STY:79.9663@AEDS(1.0000)DS(1.0000)EPEPEDNVR;
AEEDEILNRSPR	AEEDEILNRS[79.9663]PR	K	N	609	620	12	2	10S(79.9663)	sp|P27824-2|CALX_HUMAN	P27824-2	CALX_HUMAN	CANX	Isoform 2 of Calnexin		sp|P27824-3|CALX_HUMAN, sp|P27824|CALX_HUMAN	9	3.45282336E8	MS/MS	STY:79.9663@AEEDEILNRS(1.0000)PR;
AEEKSPISINVK	AEEKSPIS[79.9663]INVK	K	T	348	359	12	2	8S(79.9663)	sp|Q9UK58-6|CCNL1_HUMAN	Q9UK58-6	CCNL1_HUMAN	CCNL1	Isoform 4 of Cyclin-L1		sp|Q9UK58|CCNL1_HUMAN	1	754512	MS/MS	STY:79.9663@AEEKS(0.2631)PIS(0.7369)INVK;
AEENTDQASPQEDYAGFER	AEENT[79.9663]DQASPQEDYAGFER	K	L	4530	4548	19	2,3	5T(79.9663)	sp|Q9NU22|MDN1_HUMAN	Q9NU22	MDN1_HUMAN	MDN1	Midasin			3	0	MS/MS	STY:79.9663@AEENT(0.4599)DQAS(0.4599)PQEDY(0.0802)AGFER;
AEEPPSQLDQDTQVQDMDEGSDDEEEGQK	AEEPPSQLDQDTQVQDMDEGS[79.9663]DDEEEGQK	K	V	274	302	29	3	21S(79.9663)	sp|Q15459-2|SF3A1_HUMAN	Q15459-2	SF3A1_HUMAN	SF3A1	Isoform 2 of Splicing factor 3A subunit 1		sp|Q15459|SF3A1_HUMAN	5	6.6272352E7	MS/MS	STY:79.9663@AEEPPS(0.0319)QLDQDT(0.0323)QVQDMDEGS(0.9358)DDEEEGQK;
AEEPPSQLDQDTQVQDMDEGSDDEEEGQK	AEEPPSQLDQDTQVQDM[15.9949]DEGS[79.9663]DDEEEGQK	K	V	274	302	29	3	17M(15.9949),21S(79.9663)	sp|Q15459-2|SF3A1_HUMAN	Q15459-2	SF3A1_HUMAN	SF3A1	Isoform 2 of Splicing factor 3A subunit 1		sp|Q15459|SF3A1_HUMAN	1	0	MS/MS	STY:79.9663@AEEPPS(0.1436)QLDQDT(0.2326)QVQDMDEGS(0.6238)DDEEEGQK;M:15.9949@AEEPPSQLDQDTQVQDM(1.0000)DEGSDDEEEGQK;
AEEPPSQLDQDTQVQDMDEGSDDEEEGQK	AEEPPSQLDQDT[79.9663]QVQDMDEGSDDEEEGQK	K	V	274	302	29	3	12T(79.9663)	sp|Q15459-2|SF3A1_HUMAN	Q15459-2	SF3A1_HUMAN	SF3A1	Isoform 2 of Splicing factor 3A subunit 1		sp|Q15459|SF3A1_HUMAN	3	5.8246396E7	MS/MS	STY:79.9663@AEEPPS(0.0231)QLDQDT(0.5954)QVQDMDEGS(0.3815)DDEEEGQK;
AEEPPSQLDQDTQVQDMDEGSDDEEEGQK	AEEPPS[79.9663]QLDQDTQVQDMDEGSDDEEEGQK	K	V	274	302	29	3	6S(79.9663)	sp|Q15459-2|SF3A1_HUMAN	Q15459-2	SF3A1_HUMAN	SF3A1	Isoform 2 of Splicing factor 3A subunit 1		sp|Q15459|SF3A1_HUMAN	5	6.6205688E7	MS/MS	STY:79.9663@AEEPPS(0.5880)QLDQDT(0.2060)QVQDMDEGS(0.2060)DDEEEGQK;
AEEPPSQLDQDTQVQDMDEGSDDEEEGQK	AEEPPS[79.9663]QLDQDTQVQDM[15.9949]DEGSDDEEEGQK	K	V	274	302	29	3	17M(15.9949),6S(79.9663)	sp|Q15459-2|SF3A1_HUMAN	Q15459-2	SF3A1_HUMAN	SF3A1	Isoform 2 of Splicing factor 3A subunit 1		sp|Q15459|SF3A1_HUMAN	2	1.1413567E7	MS/MS	STY:79.9663@AEEPPS(0.4611)QLDQDT(0.4611)QVQDMDEGS(0.0779)DDEEEGQK;M:15.9949@AEEPPSQLDQDTQVQDM(1.0000)DEGSDDEEEGQK;
AEGAATEEEGTPK	AEGAATEEEGT[79.9663]PK	K	E	26	38	13	2	11T(79.9663)	sp|P80723|BASP1_HUMAN	P80723	BASP1_HUMAN	BASP1	Brain acid soluble protein 1		sp|P80723-2|BASP1_HUMAN	1	1.83568e+06	MS/MS	STY:79.9663@AEGAAT(0.1335)EEEGT(0.8665)PK;
AEGAATEEEGTPK	AEGAAT[79.9663]EEEGTPK	K	E	26	38	13	2	6T(79.9663)	sp|P80723|BASP1_HUMAN	P80723	BASP1_HUMAN	BASP1	Brain acid soluble protein 1		sp|P80723-2|BASP1_HUMAN	2	1.83568e+06	MS/MS	STY:79.9663@AEGAAT(0.5000)EEEGT(0.5000)PK;
AEGEPQEESPLK	AEGEPQEES[79.9663]PLK	K	S	167	178	12	2	9S(79.9663)	sp|Q9NYF8-2|BCLF1_HUMAN	Q9NYF8-2	BCLF1_HUMAN	BCLAF1	Isoform 2 of Bcl-2-associated transcription factor 1		sp|Q9NYF8-3|BCLF1_HUMAN, sp|Q9NYF8-4|BCLF1_HUMAN, sp|Q9NYF8|BCLF1_HUMAN	4	4039806	MS/MS	STY:79.9663@AEGEPQEES(1.0000)PLK;
AEGEWEDQEALDYFSDK	AEGEWEDQEALDY[79.9663]FSDK	R	E	369	385	17	2	13Y(79.9663)	sp|Q9NYF8-2|BCLF1_HUMAN	Q9NYF8-2	BCLF1_HUMAN	BCLAF1	Isoform 2 of Bcl-2-associated transcription factor 1		sp|Q9NYF8-3|BCLF1_HUMAN, sp|Q9NYF8|BCLF1_HUMAN	1	0	MS/MS	STY:79.9663@AEGEWEDQEALDY(0.5000)FS(0.5000)DK;
AESPESSAIESTQSTPQK	AESPESSAIES[79.9663]TQSTPQK	R	G	1356	1373	18	2	11S(79.9663)	sp|Q9NTI5|PDS5B_HUMAN	Q9NTI5	PDS5B_HUMAN	PDS5B	Sister chromatid cohesion protein PDS5 homolog B		sp|Q9NTI5-2|PDS5B_HUMAN	2	1.099872E7	MS/MS	STY:79.9663@AES(0.0350)PES(0.0350)S(0.0350)AIES(0.3055)T(0.3055)QS(0.0531)T(0.2310)PQK;
AESSSGGGTVPSSAGILEQGPSPGDGSPPKPK	AESSSGGGTVPSSAGILEQGPSPGDGS[79.9663]PPKPK	R	D	276	307	32	3	27S(79.9663)	sp|Q68EM7-3|RHG17_HUMAN	Q68EM7-3	RHG17_HUMAN	ARHGAP17	Isoform 3 of Rho GTPase-activating protein 17		sp|Q68EM7-5|RHG17_HUMAN, sp|Q68EM7-6|RHG17_HUMAN, sp|Q68EM7-7|RHG17_HUMAN, sp|Q68EM7|RHG17_HUMAN	3	1.4232416E7	MS/MS	STY:79.9663@AES(0.0139)S(0.0139)S(0.0139)GGGT(0.0143)VPS(0.0270)S(0.0270)AGILEQGPS(0.0136)PGDGS(0.8762)PPKPK;
AESPESSAIESTQSTPQK	AES[79.9663]PESSAIESTQSTPQK	R	G	1356	1373	18	2	3S(79.9663)	sp|Q9NTI5|PDS5B_HUMAN	Q9NTI5	PDS5B_HUMAN	PDS5B	Sister chromatid cohesion protein PDS5 homolog B		sp|Q9NTI5-2|PDS5B_HUMAN	1	1.099872E7	MS/MS	STY:79.9663@AES(0.3245)PES(0.3245)S(0.3245)AIES(0.0067)T(0.0067)QS(0.0065)T(0.0065)PQK;
AESPSPAPPPGLR	AES[79.9663]PSPAPPPGLR	R	G	306	318	13	2	3S(79.9663)	sp|Q9BUA3|SPNDC_HUMAN	Q9BUA3	SPNDC_HUMAN	SPINDOC	Spindlin interactor and repressor of chromatin-binding protein			1	0	MS/MS	STY:79.9663@AES(0.5000)PS(0.5000)PAPPPGLR;
AETSEGSGSAPAVPEASASPK	AETSEGS[79.9663]GSAPAVPEASASPK	K	Q	74	94	21	2	7S(79.9663)	sp|P51608-2|MECP2_HUMAN	P51608-2	MECP2_HUMAN	MECP2	Isoform B of Methyl-CpG-binding protein 2		sp|P51608|MECP2_HUMAN	1	1.58005e+06	MS/MS	STY:79.9663@AET(0.0134)S(0.0134)EGS(0.2433)GS(0.2433)APAVPEAS(0.2433)AS(0.2433)PK;
AETASQSQRSPISDNSGCDAPGNSNPSLSVPSSAESEK	AET[79.9663]ASQSQRSPISDNSGC[57.0215]DAPGNSNPSLSVPSSAESEK	R	Q	14	51	38	3	18C(57.0215),3T(79.9663)	sp|Q99590-2|SCAFB_HUMAN	Q99590-2	SCAFB_HUMAN	SCAF11	Isoform 2 of Protein SCAF11		sp|Q99590|SCAFB_HUMAN	1	0	MS/MS	STY:79.9663@AET(0.0833)AS(0.0833)QS(0.0833)QRS(0.0833)PIS(0.0833)DNS(0.0833)GCDAPGNS(0.0833)NPS(0.0833)LS(0.0833)VPS(0.0833)S(0.0833)AES(0.0833)EK;
AETPTESVSEPEVATK	AET[79.9663]PTESVSEPEVATK	K	Q	193	208	16	2	3T(79.9663)	sp|P18858-2|DNLI1_HUMAN	P18858-2	DNLI1_HUMAN	LIG1	Isoform 2 of DNA ligase 1		sp|P18858-3|DNLI1_HUMAN, sp|P18858|DNLI1_HUMAN	1	0	MS/MS	STY:79.9663@AET(0.4714)PT(0.4714)ES(0.0191)VS(0.0191)EPEVAT(0.0191)K;
AFAAVPTSHPPEDAPAQPPTPGPAASPEQLSFR	AFAAVPTSHPPEDAPAQPPT[79.9663]PGPAASPEQLSFR	R	E	1242	1274	33	3	20T(79.9663)	sp|Q14160-2|SCRIB_HUMAN	Q14160-2	SCRIB_HUMAN	SCRIB	Isoform 2 of Protein scribble homolog		sp|Q14160-3|SCRIB_HUMAN, sp|Q14160|SCRIB_HUMAN	1	0	MS/MS	STY:79.9663@AFAAVPT(0.0132)S(0.0132)HPPEDAPAQPPT(0.3246)PGPAAS(0.3246)PEQLS(0.3246)FR;
AFGESSTESDEEEEEGCGHTHCVR	AFGES[79.9663]STESDEEEEEGC[57.0215]GHTHC[57.0215]VR	R	G	69	92	24	3	17C(57.0215),22C(57.0215),5S(79.9663)	sp|O60927|PP1RB_HUMAN	O60927	PP1RB_HUMAN	PPP1R11	E3 ubiquitin-protein ligase PPP1R11			2	804437	MS/MS	STY:79.9663@AFGES(0.2412)S(0.2412)T(0.2412)ES(0.2412)DEEEEEGCGHT(0.0351)HCVR;
AFGPGLQGGSAGSPAR	AFGPGLQGGS[79.9663]AGSPAR	K	F	1072	1087	16	2	10S(79.9663)	sp|P21333-2|FLNA_HUMAN	P21333-2	FLNA_HUMAN	FLNA	Isoform 2 of Filamin-A		sp|P21333|FLNA_HUMAN	2	5295285	MS/MS	STY:79.9663@AFGPGLQGGS(0.8168)AGS(0.1832)PAR;
AGAAAGDSDEESRADDK	AGAAAGDS[79.9663]DEESRADDK	R	G	330	346	17	2	8S(79.9663)	sp|O95365|ZBT7A_HUMAN	O95365	ZBT7A_HUMAN	ZBTB7A	Zinc finger and BTB domain-containing protein 7A			1	0	MS/MS	STY:79.9663@AGAAAGDS(0.5000)DEES(0.5000)RADDK;
AGDLLEDSPK	AGDLLEDS[79.9663]PK	R	R	151	160	10	2	8S(79.9663)	sp|P51858-2|HDGF_HUMAN	P51858-2	HDGF_HUMAN	HDGF	Isoform 2 of Hepatoma-derived growth factor		sp|P51858-3|HDGF_HUMAN, sp|P51858|HDGF_HUMAN	15	9.1078488E7	MS/MS	STY:79.9663@AGDLLEDS(1.0000)PK;
AGDLLEDSPKRPK	AGDLLEDS[79.9663]PKRPK	R	E	151	163	13	2,3	8S(79.9663)	sp|P51858-2|HDGF_HUMAN	P51858-2	HDGF_HUMAN	HDGF	Isoform 2 of Hepatoma-derived growth factor		sp|P51858-3|HDGF_HUMAN, sp|P51858|HDGF_HUMAN	7	4.5166212E7	MS/MS	STY:79.9663@AGDLLEDS(1.0000)PKRPK;
AGDNIPEEQPVASTPTTVSDGENKK	AGDNIPEEQPVAS[79.9663]TPTTVSDGENKK	K	D	232	256	25	3	13S(79.9663)	sp|Q9Y320-2|TMX2_HUMAN	Q9Y320-2	TMX2_HUMAN	TMX2	Isoform 2 of Thioredoxin-related transmembrane protein 2		sp|Q9Y320|TMX2_HUMAN	1	0	MS/MS	STY:79.9663@AGDNIPEEQPVAS(0.2000)T(0.2000)PT(0.2000)T(0.2000)VS(0.2000)DGENKK;
AGEPNSPDAEEANSPDVTAGCDPAGVHPPR	AGEPNSPDAEEANSPDVT[79.9663]AGC[57.0215]DPAGVHPPR	R	-	703	732	30	3	18T(79.9663),21C(57.0215)	sp|Q08J23-2|NSUN2_HUMAN	Q08J23-2	NSUN2_HUMAN	NSUN2	Isoform 2 of RNA cytosine C(5)-methyltransferase NSUN2		sp|Q08J23-3|NSUN2_HUMAN, sp|Q08J23|NSUN2_HUMAN	1	4.7765736E7	MS/MS	STY:79.9663@AGEPNS(0.3152)PDAEEANS(0.0777)PDVT(0.6072)AGCDPAGVHPPR;
AGEPNSPDAEEANSPDVTAGCDPAGVHPPR	AGEPNSPDAEEANS[79.9663]PDVTAGC[57.0215]DPAGVHPPR	R	-	703	732	30	3	14S(79.9663),21C(57.0215)	sp|Q08J23-2|NSUN2_HUMAN	Q08J23-2	NSUN2_HUMAN	NSUN2	Isoform 2 of RNA cytosine C(5)-methyltransferase NSUN2		sp|Q08J23-3|NSUN2_HUMAN, sp|Q08J23|NSUN2_HUMAN	4	4.7805248E7	MS/MS	STY:79.9663@AGEPNS(0.0524)PDAEEANS(0.5636)PDVT(0.3840)AGCDPAGVHPPR;
AGEPNSPDAEEANSPDVTAGCDPAGVHPPR	AGEPNSPDAEEANS[79.9663]PDVT[79.9663]AGC[57.0215]DPAGVHPPR	R	-	703	732	30	3	14S(79.9663),18T(79.9663),21C(57.0215)	sp|Q08J23-2|NSUN2_HUMAN	Q08J23-2	NSUN2_HUMAN	NSUN2	Isoform 2 of RNA cytosine C(5)-methyltransferase NSUN2		sp|Q08J23-3|NSUN2_HUMAN, sp|Q08J23|NSUN2_HUMAN	4	1.17827168E8	MS/MS	STY:79.9663@AGEPNS(0.1305)PDAEEANS(0.9348)PDVT(0.9348)AGCDPAGVHPPR;
AGEPNSPDAEEANSPDVTAGCDPAGVHPPR	AGEPNS[79.9663]PDAEEANSPDVTAGC[57.0215]DPAGVHPPR	R	-	703	732	30	3,4	21C(57.0215),6S(79.9663)	sp|Q08J23-2|NSUN2_HUMAN	Q08J23-2	NSUN2_HUMAN	NSUN2	Isoform 2 of RNA cytosine C(5)-methyltransferase NSUN2		sp|Q08J23-3|NSUN2_HUMAN, sp|Q08J23|NSUN2_HUMAN	8	4.9790436E7	MS/MS	STY:79.9663@AGEPNS(0.7773)PDAEEANS(0.1355)PDVT(0.0873)AGCDPAGVHPPR;
AGEPNSPDAEEANSPDVTAGCDPAGVHPPR	AGEPNS[79.9663]PDAEEANSPDVT[79.9663]AGC[57.0215]DPAGVHPPR	R	-	703	732	30	3,4	18T(79.9663),21C(57.0215),6S(79.9663)	sp|Q08J23-2|NSUN2_HUMAN	Q08J23-2	NSUN2_HUMAN	NSUN2	Isoform 2 of RNA cytosine C(5)-methyltransferase NSUN2		sp|Q08J23-3|NSUN2_HUMAN, sp|Q08J23|NSUN2_HUMAN	2	2.4845578E7	MS/MS	STY:79.9663@AGEPNS(0.7988)PDAEEANS(0.3993)PDVT(0.8020)AGCDPAGVHPPR;
AGEPNSPDAEEANSPDVTAGCDPAGVHPPR	AGEPNS[79.9663]PDAEEANS[79.9663]PDVTAGC[57.0215]DPAGVHPPR	R	-	703	732	30	3,4	14S(79.9663),21C(57.0215),6S(79.9663)	sp|Q08J23-2|NSUN2_HUMAN	Q08J23-2	NSUN2_HUMAN	NSUN2	Isoform 2 of RNA cytosine C(5)-methyltransferase NSUN2		sp|Q08J23-3|NSUN2_HUMAN, sp|Q08J23|NSUN2_HUMAN	10	1.22044632E8	MS/MS	STY:79.9663@AGEPNS(0.9352)PDAEEANS(0.9358)PDVT(0.1290)AGCDPAGVHPPR;
AGEQQLSEPEDMEMEAGDTDDPPR	AGEQQLSEPEDMEM[15.9949]EAGDT[79.9663]DDPPR	K	I	12	35	24	3	14M(15.9949),19T(79.9663)	sp|Q93009|UBP7_HUMAN	Q93009	UBP7_HUMAN	USP7	Ubiquitin carboxyl-terminal hydrolase 7			1	395362	MS/MS	STY:79.9663@AGEQQLS(0.3299)EPEDMEMEAGDT(0.6701)DDPPR;M:15.9949@AGEQQLSEPEDM(0.2853)EM(0.7147)EAGDTDDPPR;
AGEQQLSEPEDMEMEAGDTDDPPR	AGEQQLS[79.9663]EPEDMEMEAGDTDDPPR	K	I	12	35	24	3	7S(79.9663)	sp|Q93009|UBP7_HUMAN	Q93009	UBP7_HUMAN	USP7	Ubiquitin carboxyl-terminal hydrolase 7			4	6398923	MS/MS	STY:79.9663@AGEQQLS(0.9379)EPEDMEMEAGDT(0.0621)DDPPR;
AGGSAALSPSK	AGGSAALS[79.9663]PSK	K	K	24	34	11	2	8S(79.9663)	sp|Q92522|H1X_HUMAN	Q92522	H1X_HUMAN	H1-10	Histone H1.10			3	1.1199603E7	MS/MS	STY:79.9663@AGGS(0.0203)AALS(0.4899)PS(0.4899)K;
AGGSAALSPSK	AGGS[79.9663]AALSPSK	K	K	24	34	11	2	4S(79.9663)	sp|Q92522|H1X_HUMAN	Q92522	H1X_HUMAN	H1-10	Histone H1.10			3	1.14208E7	MS/MS	STY:79.9663@AGGS(0.9190)AALS(0.0510)PS(0.0300)K;
AGGSAALSPSKK	AGGS[79.9663]AALSPSKK	K	R	24	35	12	2	4S(79.9663)	sp|Q92522|H1X_HUMAN	Q92522	H1X_HUMAN	H1-10	Histone H1.10			1	0	MS/MS	STY:79.9663@AGGS(0.5585)AALS(0.2208)PS(0.2208)KK;
AGLESGAEPGDGDSDTTK	AGLESGAEPGDGDS[79.9663]DTTK	K	K	481	498	18	2	14S(79.9663)	sp|O60832|DKC1_HUMAN	O60832	DKC1_HUMAN	DKC1	H/ACA ribonucleoprotein complex subunit DKC1			5	2.67005E7	MS/MS	STY:79.9663@AGLES(0.0103)GAEPGDGDS(0.3299)DT(0.3299)T(0.3299)K;
AGLESGAEPGDGDSDTTK	AGLES[79.9663]GAEPGDGDSDTTK	K	K	481	498	18	2	5S(79.9663)	sp|O60832|DKC1_HUMAN	O60832	DKC1_HUMAN	DKC1	H/ACA ribonucleoprotein complex subunit DKC1			3	2.5941594E7	MS/MS	STY:79.9663@AGLES(0.8790)GAEPGDGDS(0.0403)DT(0.0403)T(0.0403)K;
AGLGSPERPPKTSPGSPR	AGLGSPERPPKT[79.9663]S[79.9663]PGSPR	R	L	54	71	18	3	12T(79.9663),13S(79.9663)	sp|Q9H6F5|CCD86_HUMAN	Q9H6F5	CCD86_HUMAN	CCDC86	Coiled-coil domain-containing protein 86			1	5250640	MS/MS	STY:79.9663@AGLGS(0.1527)PERPPKT(0.6158)S(0.6158)PGS(0.6158)PR;
AGMSSNQSISSPVLDAVPR	AGMSSNQSISS[79.9663]PVLDAVPR	K	T	1394	1412	19	2	11S(79.9663)	sp|Q9UQ35|SRRM2_HUMAN	Q9UQ35	SRRM2_HUMAN	SRRM2	Serine/arginine repetitive matrix protein 2		sp|Q9UQ35-2|SRRM2_HUMAN	1	0	MS/MS	STY:79.9663@AGMS(0.2307)S(0.2307)NQS(0.2307)IS(0.0259)S(0.2818)PVLDAVPR;
AGMSSNQSISSPVLDAVPR	AGMS[79.9663]SNQSISSPVLDAVPR	K	T	1394	1412	19	2	4S(79.9663)	sp|Q9UQ35|SRRM2_HUMAN	Q9UQ35	SRRM2_HUMAN	SRRM2	Serine/arginine repetitive matrix protein 2		sp|Q9UQ35-2|SRRM2_HUMAN	1	0	MS/MS	STY:79.9663@AGMS(0.2458)S(0.2458)NQS(0.2458)IS(0.2458)S(0.0168)PVLDAVPR;
AGPTLTDENGDDLGLPPSPGDTSYYQDQVDDFHEAR	AGPTLTDENGDDLGLPPS[79.9663]PGDTSYYQDQVDDFHEAR	K	S	20	55	36	3	18S(79.9663)	sp|Q9NQZ2|SAS10_HUMAN	Q9NQZ2	SAS10_HUMAN	UTP3	Something about silencing protein 10			3	1.2081822E7	MS/MS	STY:79.9663@AGPT(0.0183)LT(0.0138)DENGDDLGLPPS(0.9020)PGDT(0.0165)S(0.0165)Y(0.0165)Y(0.0165)QDQVDDFHEAR;
AGSNEDPILAPSGTPPPTIPPDETFGGR	AGSNEDPILAPS[79.9663]GTPPPTIPPDETFGGR	R	V	732	759	28	3	12S(79.9663)	sp|Q8IZL8|PELP1_HUMAN	Q8IZL8	PELP1_HUMAN	PELP1	Proline-, glutamic acid- and leucine-rich protein 1			1	0	MS/MS	STY:79.9663@AGS(0.0400)NEDPILAPS(0.3124)GT(0.3124)PPPT(0.3124)IPPDET(0.0230)FGGR;
AGSNEDPILAPSGTPPPTIPPDETFGGR	AGS[79.9663]NEDPILAPSGTPPPTIPPDETFGGR	R	V	732	759	28	3	3S(79.9663)	sp|Q8IZL8|PELP1_HUMAN	Q8IZL8	PELP1_HUMAN	PELP1	Proline-, glutamic acid- and leucine-rich protein 1			2	1.3085657E7	MS/MS	STY:79.9663@AGS(0.4551)NEDPILAPS(0.4551)GT(0.0541)PPPT(0.0183)IPPDET(0.0175)FGGR;
AHSSPASLQLGAVSPGTLTPTGVVSGPAATPTAQHLR	AHSSPASLQLGAVSPGTLTPTGVVSGPAAT[79.9663]PTAQHLR	R	Q	125	161	37	4	30T(79.9663)	sp|P46937-2|YAP1_HUMAN	P46937-2	YAP1_HUMAN	YAP1	Isoform 2 of Transcriptional coactivator YAP1		sp|P46937-3|YAP1_HUMAN, sp|P46937-5|YAP1_HUMAN, sp|P46937-6|YAP1_HUMAN, sp|P46937-7|YAP1_HUMAN, sp|P46937-8|YAP1_HUMAN, sp|P46937-9|YAP1_HUMAN, sp|P46937|YAP1_HUMAN	1	0	MS/MS	STY:79.9663@AHS(0.0117)S(0.0117)PAS(0.0117)LQLGAVS(0.0117)PGT(0.0117)LT(0.0117)PT(0.0117)GVVS(0.0241)GPAAT(0.8863)PT(0.0080)AQHLR;
AHSSPASLQLGAVSPGTLTPTGVVSGPAATPTAQHLR	AHSSPASLQLGAVS[79.9663]PGTLTPTGVVSGPAATPTAQHLR	R	Q	125	161	37	3	14S(79.9663)	sp|P46937-2|YAP1_HUMAN	P46937-2	YAP1_HUMAN	YAP1	Isoform 2 of Transcriptional coactivator YAP1		sp|P46937-3|YAP1_HUMAN, sp|P46937-5|YAP1_HUMAN, sp|P46937-6|YAP1_HUMAN, sp|P46937-7|YAP1_HUMAN, sp|P46937-8|YAP1_HUMAN, sp|P46937-9|YAP1_HUMAN, sp|P46937|YAP1_HUMAN	1	4569613	MS/MS	STY:79.9663@AHS(0.0156)S(0.0156)PAS(0.0156)LQLGAVS(0.2723)PGT(0.2723)LT(0.2723)PT(0.0152)GVVS(0.0042)GPAAT(0.0047)PT(0.1122)AQHLR;
AHSSPASLQLGAVSPGTLTPTGVVSGPAATPTAQHLR	AHSSPAS[79.9663]LQLGAVSPGTLTPTGVVSGPAATPTAQHLR	R	Q	125	161	37	3	7S(79.9663)	sp|P46937-2|YAP1_HUMAN	P46937-2	YAP1_HUMAN	YAP1	Isoform 2 of Transcriptional coactivator YAP1		sp|P46937-3|YAP1_HUMAN, sp|P46937-5|YAP1_HUMAN, sp|P46937-6|YAP1_HUMAN, sp|P46937-7|YAP1_HUMAN, sp|P46937-8|YAP1_HUMAN, sp|P46937-9|YAP1_HUMAN, sp|P46937|YAP1_HUMAN	1	4569613	MS/MS	STY:79.9663@AHS(0.0340)S(0.0340)PAS(0.1834)LQLGAVS(0.1834)PGT(0.1834)LT(0.1834)PT(0.1834)GVVS(0.0059)GPAAT(0.0045)PT(0.0045)AQHLR;
AHTPTPGIYMGR	AHT[79.9663]PTPGIYMGR	R	P	200	211	12	2	3T(79.9663)	sp|Q13595|TRA2A_HUMAN	Q13595	TRA2A_HUMAN	TRA2A	Transformer-2 protein homolog alpha		sp|Q13595-2|TRA2A_HUMAN, sp|Q13595-3|TRA2A_HUMAN, sp|Q13595-4|TRA2A_HUMAN	1	0	MS/MS	STY:79.9663@AHT(0.8970)PT(0.0613)PGIY(0.0418)MGR;
AHTPTPGIYMGRPTHSGGGGGGGGGGGGGGGGR	AHT[79.9663]PTPGIYM[15.9949]GRPTHSGGGGGGGGGGGGGGGGR	R	R	200	232	33	4	10M(15.9949),3T(79.9663)	sp|Q13595|TRA2A_HUMAN	Q13595	TRA2A_HUMAN	TRA2A	Transformer-2 protein homolog alpha		sp|Q13595-3|TRA2A_HUMAN, sp|Q13595-4|TRA2A_HUMAN	1	1.56913e+06	MS/MS	STY:79.9663@AHT(0.2000)PT(0.2000)PGIY(0.2000)MGRPT(0.2000)HS(0.2000)GGGGGGGGGGGGGGGGR;M:15.9949@AHTPTPGIYM(1.0000)GRPTHSGGGGGGGGGGGGGGGGR;
AIGGIILTASHNPGGPNGDFGIK	AIGGIILT[79.9663]ASHNPGGPNGDFGIK	K	F	126	148	23	3	8T(79.9663)	sp|P36871-2|PGM1_HUMAN	P36871-2	PGM1_HUMAN	PGM1	Isoform 2 of Phosphoglucomutase-1		sp|P36871|PGM1_HUMAN	6	3.8166712E7	MS/MS	STY:79.9663@AIGGIILT(0.8496)AS(0.1504)HNPGGPNGDFGIK;
AIPGDQHPESPVHTEPMGIQGR	AIPGDQHPES[79.9663]PVHTEPMGIQGR	R	G	784	805	22	3	10S(79.9663)	sp|Q14676-3|MDC1_HUMAN	Q14676-3	MDC1_HUMAN	MDC1	Isoform 3 of Mediator of DNA damage checkpoint protein 1		sp|Q14676|MDC1_HUMAN	1	6.07131e+06	MS/MS	STY:79.9663@AIPGDQHPES(0.5000)PVHT(0.5000)EPMGIQGR;
AITSLLGGGSPK	AIT[79.9663]SLLGGGSPK	K	N	2649	2660	12	2	3T(79.9663)	sp|Q6KC79-2|NIPBL_HUMAN	Q6KC79-2	NIPBL_HUMAN	NIPBL	Isoform 2 of Nipped-B-like protein		sp|Q6KC79|NIPBL_HUMAN	1	3.30856e+06	MS/MS	STY:79.9663@AIT(0.3333)S(0.3333)LLGGGS(0.3333)PK;
AKSPQPPVEEEDEHFDDTVVCLDTYNCDLHFK	AKSPQPPVEEEDEHFDDTVVC[57.0215]LDT[79.9663]YNC[57.0215]DLHFK	R	I	250	281	32	4,5	21C(57.0215),24T(79.9663),27C(57.0215)	sp|Q00839-2|HNRPU_HUMAN	Q00839-2	HNRPU_HUMAN	HNRNPU	Isoform 2 of Heterogeneous nuclear ribonucleoprotein U		sp|Q00839|HNRPU_HUMAN	4	2.82756256E8	MS/MS	STY:79.9663@AKS(0.0413)PQPPVEEEDEHFDDT(0.1263)VVCLDT(0.8032)Y(0.0292)NCDLHFK;
AKSPQPPVEEEDEHFDDTVVCLDTYNCDLHFK	AKSPQPPVEEEDEHFDDT[79.9663]VVC[57.0215]LDTYNC[57.0215]DLHFK	R	I	250	281	32	3,4,5	18T(79.9663),21C(57.0215),27C(57.0215)	sp|Q00839-2|HNRPU_HUMAN	Q00839-2	HNRPU_HUMAN	HNRNPU	Isoform 2 of Heterogeneous nuclear ribonucleoprotein U		sp|Q00839|HNRPU_HUMAN	15	3.37972256E8	MS/MS	STY:79.9663@AKS(0.0218)PQPPVEEEDEHFDDT(0.9325)VVCLDT(0.0239)Y(0.0218)NCDLHFK;
AKSPQPPVEEEDEHFDDTVVCLDTYNCDLHFK	AKS[79.9663]PQPPVEEEDEHFDDTVVC[57.0215]LDTYNC[57.0215]DLHFK	R	I	250	281	32	3,4	21C(57.0215),27C(57.0215),3S(79.9663)	sp|Q00839-2|HNRPU_HUMAN	Q00839-2	HNRPU_HUMAN	HNRNPU	Isoform 2 of Heterogeneous nuclear ribonucleoprotein U		sp|Q00839|HNRPU_HUMAN	10	3.32480768E8	MS/MS	STY:79.9663@AKS(0.9136)PQPPVEEEDEHFDDT(0.0298)VVCLDT(0.0283)Y(0.0283)NCDLHFK;
AKSPTPESSTIASYVTLR	AKS[79.9663]PTPESSTIASYVTLR	R	K	911	928	18	3	3S(79.9663)	sp|Q9HAU0-2|PKHA5_HUMAN	Q9HAU0-2	PKHA5_HUMAN	PLEKHA5	Isoform 2 of Pleckstrin homology domain-containing family A member 5		sp|Q9HAU0-4|PKHA5_HUMAN, sp|Q9HAU0-5|PKHA5_HUMAN, sp|Q9HAU0-6|PKHA5_HUMAN, sp|Q9HAU0-8|PKHA5_HUMAN, sp|Q9HAU0|PKHA5_HUMAN	1	0	MS/MS	STY:79.9663@AKS(0.1250)PT(0.1250)PES(0.1250)S(0.1250)T(0.1250)IAS(0.1250)Y(0.1250)VT(0.1250)LR;
AKSPTPDGSER	AKS[79.9663]PT[79.9663]PDGSER	R	I	144	154	11	2	3S(79.9663),5T(79.9663)	sp|Q96MU7-2|YTDC1_HUMAN	Q96MU7-2	YTDC1_HUMAN	YTHDC1	Isoform 2 of YTH domain-containing protein 1		sp|Q96MU7|YTDC1_HUMAN	1	0	MS/MS	STY:79.9663@AKS(0.6846)PT(0.6577)PDGS(0.6577)ER;
ALDISLSSGEEDEGDEEDSTAGTTK	ALDIS[79.9663]LS[79.9663]SGEEDEGDEEDSTAGTTK	K	Q	329	353	25	3	5S(79.9663),7S(79.9663)	sp|Q8IY81|SPB1_HUMAN	Q8IY81	SPB1_HUMAN	FTSJ3	pre-rRNA 2'-O-ribose RNA methyltransferase FTSJ3			1	2747442	MS/MS	STY:79.9663@ALDIS(0.4298)LS(0.4298)S(0.4298)GEEDEGDEEDS(0.4298)T(0.0935)AGT(0.0935)T(0.0935)K;
ALEAASLSQHPPSLCISDSEEEEEERK	ALEAASLSQHPPSLC[57.0215]IS[79.9663]DS[79.9663]EEEEEERK	R	K	46	72	27	3	15C(57.0215),17S(79.9663),19S(79.9663)	sp|O43159|RRP8_HUMAN	O43159	RRP8_HUMAN	RRP8	Ribosomal RNA-processing protein 8			1	6.2346e+06	MS/MS	STY:79.9663@ALEAAS(0.2268)LS(0.2268)QHPPS(0.2345)LCIS(0.6531)DS(0.6588)EEEEEERK;
ALEQQEAESDSSDTEEKDDDDDDEEDVGKR	ALEQQEAES[79.9663]DSS[79.9663]DT[79.9663]EEKDDDDDDEEDVGKR	K	E	189	218	30	3	12S(79.9663),14T(79.9663),9S(79.9663)	sp|Q9BXY0|MAK16_HUMAN	Q9BXY0	MAK16_HUMAN	MAK16	Protein MAK16 homolog			1	1.21852e+06	MS/MS	STY:79.9663@ALEQQEAES(0.7437)DS(0.7437)S(0.7563)DT(0.7563)EEKDDDDDDEEDVGKR;
ALEQQEAESDSSDTEEKDDDDDDEEDVGKR	ALEQQEAES[79.9663]DS[79.9663]SDTEEKDDDDDDEEDVGKR	K	E	189	218	30	3	11S(79.9663),9S(79.9663)	sp|Q9BXY0|MAK16_HUMAN	Q9BXY0	MAK16_HUMAN	MAK16	Protein MAK16 homolog			2	4232122	MS/MS	STY:79.9663@ALEQQEAES(0.5000)DS(0.5000)S(0.5000)DT(0.5000)EEKDDDDDDEEDVGKR;
ALFKPPEDSQDDESDSDAEEEQTTK	ALFKPPEDS[79.9663]QDDES[79.9663]DSDAEEEQTTK	K	R	299	323	25	3	14S(79.9663),9S(79.9663)	sp|Q13769|THOC5_HUMAN	Q13769	THOC5_HUMAN	THOC5	THO complex subunit 5 homolog			1	3.1649e+06	MS/MS	STY:79.9663@ALFKPPEDS(0.4000)QDDES(0.4000)DS(0.4000)DAEEEQT(0.4000)T(0.4000)K;
ALPQTPRPR	ALPQT[79.9663]PRPR	K	S	1488	1496	9	2	5T(79.9663)	sp|Q9UQ35|SRRM2_HUMAN	Q9UQ35	SRRM2_HUMAN	SRRM2	Serine/arginine repetitive matrix protein 2		sp|Q9UQ35-2|SRRM2_HUMAN	1	1.34467e+06	MS/MS	STY:79.9663@ALPQT(1.0000)PRPR;
ALSSLHGDDQDSEDEVLTIPEVK	ALSSLHGDDQDSEDEVLT[79.9663]IPEVK	K	V	2398	2420	23	3	18T(79.9663)	sp|P11717|MPRI_HUMAN	P11717	MPRI_HUMAN	IGF2R	Cation-independent mannose-6-phosphate receptor			2	7.1329e+06	MS/MS	STY:79.9663@ALS(0.1062)S(0.1062)LHGDDQDS(0.0457)EDEVLT(0.7420)IPEVK;
ALSDREEEEEDDEEEEEEVEAAAQR	ALS[79.9663]DREEEEEDDEEEEEEVEAAAQR	R	R	494	518	25	3	3S(79.9663)	sp|Q8N3E9|PLCD3_HUMAN	Q8N3E9	PLCD3_HUMAN	PLCD3	1-phosphatidylinositol 4,5-bisphosphate phosphodiesterase delta-3			1	0	MS/MS	STY:79.9663@ALS(1.0000)DREEEEEDDEEEEEEVEAAAQR;
ALSSDSILSPAPDAR	ALS[79.9663]SDSILSPAPDAR	R	A	392	406	15	2	3S(79.9663)	sp|Q8IVT2|MISP_HUMAN	Q8IVT2	MISP_HUMAN	MISP	Mitotic interactor and substrate of PLK1			1	0	MS/MS	STY:79.9663@ALS(0.2500)S(0.2500)DS(0.2500)ILS(0.2500)PAPDAR;
ALSSLHGDDQDSEDEVLTIPEVK	ALS[79.9663]SLHGDDQDSEDEVLTIPEVK	K	V	2398	2420	23	3	3S(79.9663)	sp|P11717|MPRI_HUMAN	P11717	MPRI_HUMAN	IGF2R	Cation-independent mannose-6-phosphate receptor			1	7.1329e+06	MS/MS	STY:79.9663@ALS(0.2500)S(0.2500)LHGDDQDS(0.2500)EDEVLT(0.2500)IPEVK;
ALVEFESNPEETREPGSPPSVQR	ALVEFESNPEETREPGSPPS[79.9663]VQR	R	A	31	53	23	3	20S(79.9663)	sp|Q9H6F5|CCD86_HUMAN	Q9H6F5	CCD86_HUMAN	CCDC86	Coiled-coil domain-containing protein 86			2	2.5141024E7	MS/MS	STY:79.9663@ALVEFES(0.0790)NPEET(0.0790)REPGS(0.2694)PPS(0.5726)VQR;
ALVEFESNPEETREPGSPPSVQR	ALVEFESNPEETREPGS[79.9663]PPSVQR	R	A	31	53	23	3	17S(79.9663)	sp|Q9H6F5|CCD86_HUMAN	Q9H6F5	CCD86_HUMAN	CCDC86	Coiled-coil domain-containing protein 86			1	2.5141024E7	MS/MS	STY:79.9663@ALVEFES(0.1280)NPEET(0.0129)REPGS(0.4295)PPS(0.4295)VQR;
ALVEFESNPEETREPGSPPSVQR	ALVEFES[79.9663]NPEETREPGSPPSVQR	R	A	31	53	23	3	7S(79.9663)	sp|Q9H6F5|CCD86_HUMAN	Q9H6F5	CCD86_HUMAN	CCDC86	Coiled-coil domain-containing protein 86			1	0	MS/MS	STY:79.9663@ALVEFES(0.9124)NPEET(0.0338)REPGS(0.0338)PPS(0.0200)VQR;
ALVVPEPEPDSDSNQER	ALVVPEPEPDS[79.9663]DSNQER	K	K	126	142	17	2	11S(79.9663)	sp|Q5VTR2|BRE1A_HUMAN	Q5VTR2	BRE1A_HUMAN	RNF20	E3 ubiquitin-protein ligase BRE1A			2	0	MS/MS	STY:79.9663@ALVVPEPEPDS(0.5000)DS(0.5000)NQER;
AMADELSEK	AMADELS[79.9663]EK	K	Q	31	39	9	2	7S(79.9663)	sp|Q03135|CAV1_HUMAN	Q03135	CAV1_HUMAN	CAV1	Caveolin-1			1	0	MS/MS	STY:79.9663@AMADELS(1.0000)EK;
APEPLGPADQSELGPEQLEAEVGESSDEEPVESR	APEPLGPADQSELGPEQLEAEVGES[79.9663]S[79.9663]DEEPVESR	K	A	141	174	34	3	25S(79.9663),26S(79.9663)	sp|Q969G5|CAVN3_HUMAN	Q969G5	CAVN3_HUMAN	CAVIN3	Caveolae-associated protein 3			1	1.7453874E7	MS/MS	STY:79.9663@APEPLGPADQS(0.2619)ELGPEQLEAEVGES(0.8338)S(0.8338)DEEPVES(0.0705)R;
APEPLGPADQSELGPEQLEAEVGESSDEEPVESR	APEPLGPADQS[79.9663]ELGPEQLEAEVGES[79.9663]SDEEPVESR	K	A	141	174	34	3	11S(79.9663),25S(79.9663)	sp|Q969G5|CAVN3_HUMAN	Q969G5	CAVN3_HUMAN	CAVIN3	Caveolae-associated protein 3			1	1.833748E7	MS/MS	STY:79.9663@APEPLGPADQS(0.5878)ELGPEQLEAEVGES(0.5523)S(0.5523)DEEPVES(0.3075)R;
APQTSSSPPPVR	APQTSSS[79.9663]PPPVR	R	R	690	701	12	2	7S(79.9663)	sp|Q8IYB3|SRRM1_HUMAN	Q8IYB3	SRRM1_HUMAN	SRRM1	Serine/arginine repetitive matrix protein 1		sp|Q8IYB3-2|SRRM1_HUMAN	1	1.5405017E7	MS/MS	STY:79.9663@APQT(0.0254)S(0.0254)S(0.0254)S(0.9238)PPPVR;
APQTSSSPPPVR	APQTSS[79.9663]SPPPVR	R	R	690	701	12	2	6S(79.9663)	sp|Q8IYB3|SRRM1_HUMAN	Q8IYB3	SRRM1_HUMAN	SRRM1	Serine/arginine repetitive matrix protein 1		sp|Q8IYB3-2|SRRM1_HUMAN	1	0	MS/MS	STY:79.9663@APQT(0.1088)S(0.1088)S(0.3912)S(0.3912)PPPVR;
APQTSSSPPPVR	APQTS[79.9663]SSPPPVR	R	R	690	701	12	2	5S(79.9663)	sp|Q8IYB3|SRRM1_HUMAN	Q8IYB3	SRRM1_HUMAN	SRRM1	Serine/arginine repetitive matrix protein 1		sp|Q8IYB3-2|SRRM1_HUMAN	2	1.5405017E7	MS/MS	STY:79.9663@APQT(0.0538)S(0.8560)S(0.0451)S(0.0451)PPPVR;
APQTSSSPPPVR	APQT[79.9663]SSSPPPVR	R	R	690	701	12	2	4T(79.9663)	sp|Q8IYB3|SRRM1_HUMAN	Q8IYB3	SRRM1_HUMAN	SRRM1	Serine/arginine repetitive matrix protein 1		sp|Q8IYB3-2|SRRM1_HUMAN	7	1.5444275E7	MS/MS	STY:79.9663@APQT(0.4848)S(0.4848)S(0.0152)S(0.0152)PPPVR;
APQTSSSPPPVR	APQT[79.9663]SSS[79.9663]PPPVR	R	R	690	701	12	2	4T(79.9663),7S(79.9663)	sp|Q8IYB3|SRRM1_HUMAN	Q8IYB3	SRRM1_HUMAN	SRRM1	Serine/arginine repetitive matrix protein 1		sp|Q8IYB3-2|SRRM1_HUMAN	1	5156643	MS/MS	STY:79.9663@APQT(0.4903)S(0.4903)S(0.4903)S(0.5291)PPPVR;
APQTSSSPPPVR	APQT[79.9663]S[79.9663]SSPPPVR	R	R	690	701	12	2	4T(79.9663),5S(79.9663)	sp|Q8IYB3|SRRM1_HUMAN	Q8IYB3	SRRM1_HUMAN	SRRM1	Serine/arginine repetitive matrix protein 1		sp|Q8IYB3-2|SRRM1_HUMAN	3	0	MS/MS	STY:79.9663@APQT(0.5548)S(0.5548)S(0.5548)S(0.3356)PPPVR;
APSVANVGSHCDLSLK	APS[79.9663]VANVGSHC[57.0215]DLSLK	R	I	2142	2157	16	2	11C(57.0215),3S(79.9663)	sp|P21333-2|FLNA_HUMAN	P21333-2	FLNA_HUMAN	FLNA	Isoform 2 of Filamin-A		sp|P21333|FLNA_HUMAN	3	8.02192e+06	MS/MS	STY:79.9663@APS(0.9351)VANVGS(0.0324)HCDLS(0.0324)LK;
APVHFVEPLSPTGVAGHR	APVHFVEPLS[79.9663]PTGVAGHR	K	K	793	810	18	3	10S(79.9663)	sp|Q5T5Y3-2|CAMP1_HUMAN	Q5T5Y3-2	CAMP1_HUMAN	CAMSAP1	Isoform 2 of Calmodulin-regulated spectrin-associated protein 1		sp|Q5T5Y3-3|CAMP1_HUMAN, sp|Q5T5Y3|CAMP1_HUMAN	1	1.4968e+06	MS/MS	STY:79.9663@APVHFVEPLS(0.5000)PT(0.5000)GVAGHR;
APVPSTCSSTFPEELSPPSHQAK	APVPSTC[57.0215]SSTFPEELSPPS[79.9663]HQAK	K	R	154	176	23	3	19S(79.9663),7C(57.0215)	sp|Q14980-2|NUMA1_HUMAN	Q14980-2	NUMA1_HUMAN	NUMA1	Isoform 2 of Nuclear mitotic apparatus protein 1		sp|Q14980-3|NUMA1_HUMAN, sp|Q14980-4|NUMA1_HUMAN, sp|Q14980-5|NUMA1_HUMAN, sp|Q14980|NUMA1_HUMAN	1	4.01102e+06	MS/MS	STY:79.9663@APVPS(0.1088)T(0.1088)CS(0.0139)S(0.0139)T(0.0139)FPEELS(0.1078)PPS(0.6330)HQAK;
APVPSTCSSTFPEELSPPSHQAK	APVPSTC[57.0215]SSTFPEELS[79.9663]PPSHQAK	K	R	154	176	23	3	16S(79.9663),7C(57.0215)	sp|Q14980-2|NUMA1_HUMAN	Q14980-2	NUMA1_HUMAN	NUMA1	Isoform 2 of Nuclear mitotic apparatus protein 1		sp|Q14980-3|NUMA1_HUMAN, sp|Q14980-4|NUMA1_HUMAN, sp|Q14980-5|NUMA1_HUMAN, sp|Q14980|NUMA1_HUMAN	3	6482499	MS/MS	STY:79.9663@APVPS(0.0207)T(0.0207)CS(0.0207)S(0.0207)T(0.0207)FPEELS(0.8848)PPS(0.0115)HQAK;
APVQPQQSPAAAPGGTDEK	APVQPQQS[79.9663]PAAAPGGTDEK	K	P	9	27	19	2	8S(79.9663)	sp|Q13200|PSMD2_HUMAN	Q13200	PSMD2_HUMAN	PSMD2	26S proteasome non-ATPase regulatory subunit 2			2	3.14489e+06	MS/MS	STY:79.9663@APVQPQQS(0.9291)PAAAPGGT(0.0709)DEK;
AQAVSEEEEEEEGK	AQAVS[79.9663]EEEEEEEGK	K	S	78	91	14	2	5S(79.9663)	sp|Q9GZR7-2|DDX24_HUMAN	Q9GZR7-2	DDX24_HUMAN	DDX24	Isoform 2 of ATP-dependent RNA helicase DDX24		sp|Q9GZR7|DDX24_HUMAN	4	3.59922e+06	MS/MS	STY:79.9663@AQAVS(1.0000)EEEEEEEGK;
AQGEPVAGHESPKIPYEK	AQGEPVAGHES[79.9663]PKIPYEK	R	Q	789	806	18	3	11S(79.9663)	sp|O94979-2|SC31A_HUMAN	O94979-2	SC31A_HUMAN	SEC31A	Isoform 2 of Protein transport protein Sec31A		sp|O94979-10|SC31A_HUMAN, sp|O94979-3|SC31A_HUMAN, sp|O94979-4|SC31A_HUMAN, sp|O94979-6|SC31A_HUMAN, sp|O94979-7|SC31A_HUMAN, sp|O94979-8|SC31A_HUMAN, sp|O94979-9|SC31A_HUMAN, sp|O94979|SC31A_HUMAN	4	1.6888566E7	MS/MS	STY:79.9663@AQGEPVAGHES(0.8582)PKIPY(0.1418)EK;
AQLEPVASPAK	AQLEPVAS[79.9663]PAK	K	K	1428	1438	11	2	8S(79.9663)	sp|Q15149|PLEC_HUMAN	Q15149	PLEC_HUMAN	PLEC	Plectin		sp|Q15149-2|PLEC_HUMAN, sp|Q15149-3|PLEC_HUMAN, sp|Q15149-4|PLEC_HUMAN, sp|Q15149-5|PLEC_HUMAN, sp|Q15149-6|PLEC_HUMAN, sp|Q15149-7|PLEC_HUMAN, sp|Q15149-8|PLEC_HUMAN, sp|Q15149-9|PLEC_HUMAN	1	1.13537e+06	MS/MS	STY:79.9663@AQLEPVAS(1.0000)PAK;
AQQQEEQGSVNDVKEEEK	AQQQEEQGS[79.9663]VNDVKEEEK	K	E	535	552	18	3	9S(79.9663)	sp|Q9Y4W2-2|LAS1L_HUMAN	Q9Y4W2-2	LAS1L_HUMAN	LAS1L	Isoform 2 of Ribosomal biogenesis protein LAS1L		sp|Q9Y4W2-3|LAS1L_HUMAN, sp|Q9Y4W2|LAS1L_HUMAN	1	0	MS/MS	STY:79.9663@AQQQEEQGS(1.0000)VNDVKEEEK;
AQSYPDNHQEFSDYDNPIFEK	AQS[79.9663]YPDNHQEFSDYDNPIFEK	R	F	237	257	21	3	3S(79.9663)	sp|Q9Y2U5|M3K2_HUMAN	Q9Y2U5	M3K2_HUMAN	MAP3K2	Mitogen-activated protein kinase kinase kinase 2			1	1.41114e+06	MS/MS	STY:79.9663@AQS(0.2500)Y(0.2500)PDNHQEFS(0.2500)DY(0.2500)DNPIFEK;
AQTPPGPSLSGSK	AQTPPGPSLS[79.9663]GSK	K	S	1001	1013	13	2	10S(79.9663)	sp|Q9UQ35|SRRM2_HUMAN	Q9UQ35	SRRM2_HUMAN	SRRM2	Serine/arginine repetitive matrix protein 2		sp|Q9UQ35-2|SRRM2_HUMAN	1	8428520	MS/MS	STY:79.9663@AQT(0.0185)PPGPS(0.0316)LS(0.4750)GS(0.4750)K;
AQTPPGPSLSGSK	AQT[79.9663]PPGPSLSGSK	K	S	1001	1013	13	2	3T(79.9663)	sp|Q9UQ35|SRRM2_HUMAN	Q9UQ35	SRRM2_HUMAN	SRRM2	Serine/arginine repetitive matrix protein 2		sp|Q9UQ35-2|SRRM2_HUMAN	4	5102299	MS/MS	STY:79.9663@AQT(0.9329)PPGPS(0.0224)LS(0.0224)GS(0.0224)K;
AQTPPGPSLSGSKSPCPQEK	AQT[79.9663]PPGPS[79.9663]LSGSKSPC[57.0215]PQEK	K	S	1001	1020	20	3	16C(57.0215),3T(79.9663),8S(79.9663)	sp|Q9UQ35|SRRM2_HUMAN	Q9UQ35	SRRM2_HUMAN	SRRM2	Serine/arginine repetitive matrix protein 2		sp|Q9UQ35-2|SRRM2_HUMAN	2	6.30719e+06	MS/MS	STY:79.9663@AQT(0.4000)PPGPS(0.4000)LS(0.4000)GS(0.4000)KS(0.4000)PCPQEK;
ARGDSEALDEES	ARGDS[79.9663]EALDEES	R	-	659	670	12	2	5S(79.9663)	sp|Q7Z4V5-2|HDGR2_HUMAN	Q7Z4V5-2	HDGR2_HUMAN	HDGFL2	Isoform 2 of Hepatoma-derived growth factor-related protein 2		sp|Q7Z4V5-3|HDGR2_HUMAN, sp|Q7Z4V5-4|HDGR2_HUMAN, sp|Q7Z4V5|HDGR2_HUMAN	3	2.47987e+06	MS/MS	STY:79.9663@ARGDS(0.9354)EALDEES(0.0646);
ARHDSPDLAPNVTYSLPR	ARHDS[79.9663]PDLAPNVTYSLPR	R	T	267	284	18	3	5S(79.9663)	sp|Q9BRD0|BUD13_HUMAN	Q9BRD0	BUD13_HUMAN	BUD13	BUD13 homolog			3	1.83882e+06	MS/MS	STY:79.9663@ARHDS(0.9166)PDLAPNVT(0.0278)Y(0.0278)S(0.0278)LPR;
ARQEEGADASEEDPTPAGEEDVK	ARQEEGADAS[79.9663]EEDPTPAGEEDVK	R	D	245	267	23	3	10S(79.9663)	sp|Q86X53|ERIC1_HUMAN	Q86X53	ERIC1_HUMAN	ERICH1	Glutamate-rich protein 1			1	963050	MS/MS	STY:79.9663@ARQEEGADAS(0.8462)EEDPT(0.1538)PAGEEDVK;
ARSDEGQLSPATR	ARS[79.9663]DEGQLSPATR	R	G	712	724	13	3	3S(79.9663)	sp|Q15149|PLEC_HUMAN	Q15149	PLEC_HUMAN	PLEC	Plectin		sp|Q15149-2|PLEC_HUMAN, sp|Q15149-3|PLEC_HUMAN, sp|Q15149-4|PLEC_HUMAN, sp|Q15149-5|PLEC_HUMAN, sp|Q15149-6|PLEC_HUMAN, sp|Q15149-7|PLEC_HUMAN, sp|Q15149-8|PLEC_HUMAN, sp|Q15149-9|PLEC_HUMAN	1	0	MS/MS	STY:79.9663@ARS(0.4834)DEGQLS(0.4834)PAT(0.0331)R;
ARSPSVAAMASPQLCR	ARS[79.9663]PSVAAMASPQLC[57.0215]R	R	A	13	28	16	3	15C(57.0215),3S(79.9663)	sp|P25325-2|THTM_HUMAN	P25325-2	THTM_HUMAN	MPST	Isoform 2 of 3-mercaptopyruvate sulfurtransferase			3	1.7405e+06	MS/MS	STY:79.9663@ARS(0.4814)PS(0.4814)VAAMAS(0.0372)PQLCR;
ARSVSPPPK	ARS[79.9663]VS[79.9663]PPPK	K	R	312	320	9	2	3S(79.9663),5S(79.9663)	sp|Q13247|SRSF6_HUMAN	Q13247	SRSF6_HUMAN	SRSF6	Serine/arginine-rich splicing factor 6			7	7.4211728E7	MS/MS	STY:79.9663@ARS(1.0000)VS(1.0000)PPPK;
ARSVSPPPKR	ARS[79.9663]VS[79.9663]PPPKR	K	A	312	321	10	2	3S(79.9663),5S(79.9663)	sp|Q13247|SRSF6_HUMAN	Q13247	SRSF6_HUMAN	SRSF6	Serine/arginine-rich splicing factor 6			1	6693778	MS/MS	STY:79.9663@ARS(1.0000)VS(1.0000)PPPKR;
ASALLFSSDEEDQWNIPASQTHLASDSR	ASALLFSSDEEDQWNIPAS[79.9663]QTHLASDSR	K	S	613	640	28	3	19S(79.9663)	sp|Q641Q2-2|WAC2A_HUMAN	Q641Q2-2	WAC2A_HUMAN	WASHC2A	Isoform 2 of WASH complex subunit 2A	WASHC2C	sp|Q641Q2|WAC2A_HUMAN, sp|Q9Y4E1-4|WAC2C_HUMAN, sp|Q9Y4E1-5|WAC2C_HUMAN, sp|Q9Y4E1-6|WAC2C_HUMAN, sp|Q9Y4E1|WAC2C_HUMAN	1	1.0279612E7	MS/MS	STY:79.9663@AS(0.0120)ALLFS(0.0133)S(0.0133)DEEDQWNIPAS(0.4676)QT(0.4676)HLAS(0.0131)DS(0.0131)R;
ASAVSELSPR	ASAVS[79.9663]ELSPR	R	E	236	245	10	2	5S(79.9663)	sp|Q9Y2W1|TR150_HUMAN	Q9Y2W1	TR150_HUMAN	THRAP3	Thyroid hormone receptor-associated protein 3			3	1.7184782E7	MS/MS	STY:79.9663@AS(0.0233)AVS(0.6544)ELS(0.3223)PR;
ASEDTTSGSPPKK	ASEDT[79.9663]TSGSPPKK	R	S	456	468	13	2	5T(79.9663)	sp|Q9BZZ5-1|API5_HUMAN	Q9BZZ5-1	API5_HUMAN	API5	Isoform 1 of Apoptosis inhibitor 5		sp|Q9BZZ5-2|API5_HUMAN, sp|Q9BZZ5-5|API5_HUMAN, sp|Q9BZZ5-6|API5_HUMAN, sp|Q9BZZ5|API5_HUMAN	1	5.22883e+06	MS/MS	STY:79.9663@AS(0.0097)EDT(0.2476)T(0.2476)S(0.2476)GS(0.2476)PPKK;
ASGQAFELILSPR	ASGQAFELILS[79.9663]PR	R	S	15	27	13	2	11S(79.9663)	sp|P16949-2|STMN1_HUMAN	P16949-2	STMN1_HUMAN	STMN1	Isoform 2 of Stathmin		sp|P16949|STMN1_HUMAN	5	2.832257E7	MS/MS	STY:79.9663@AS(0.0649)GQAFELILS(0.9351)PR;
ASLGSLEGEAEAEASSPK	ASLGSLEGEAEAEAS[79.9663]SPK	K	G	5748	5765	18	2,3	15S(79.9663)	sp|Q09666|AHNK_HUMAN	Q09666	AHNK_HUMAN	AHNAK	Neuroblast differentiation-associated protein AHNAK			6	1.9809594E7	MS/MS	STY:79.9663@AS(0.0133)LGS(0.0133)LEGEAEAEAS(0.4867)S(0.4867)PK;
ASLGSLEGEAEAEASSPK	ASLGS[79.9663]LEGEAEAEASSPK	K	G	5748	5765	18	2	5S(79.9663)	sp|Q09666|AHNK_HUMAN	Q09666	AHNK_HUMAN	AHNAK	Neuroblast differentiation-associated protein AHNAK			1	1.8518472E7	MS/MS	STY:79.9663@AS(0.0216)LGS(0.3377)LEGEAEAEAS(0.3204)S(0.3204)PK;
ASPAPGSGHPEGPGAHLDMNSLDR	ASPAPGSGHPEGPGAHLDMNS[79.9663]LDR	R	A	90	113	24	3	21S(79.9663)	sp|O94826|TOM70_HUMAN	O94826	TOM70_HUMAN	TOMM70	Mitochondrial import receptor subunit TOM70			1	1.4652136E7	MS/MS	STY:79.9663@AS(0.3116)PAPGS(0.3116)GHPEGPGAHLDMNS(0.3769)LDR;
ASPAPGSGHPEGPGAHLDMNSLDR	ASPAPGS[79.9663]GHPEGPGAHLDMNSLDR	R	A	90	113	24	3	7S(79.9663)	sp|O94826|TOM70_HUMAN	O94826	TOM70_HUMAN	TOMM70	Mitochondrial import receptor subunit TOM70			1	1.4679198E7	MS/MS	STY:79.9663@AS(0.0301)PAPGS(0.6754)GHPEGPGAHLDMNS(0.2944)LDR;
ASRVPSSDEEVVEEPQSR	ASRVPS[79.9663]S[79.9663]DEEVVEEPQSR	R	R	1615	1632	18	3	6S(79.9663),7S(79.9663)	sp|Q9C0C2|TB182_HUMAN	Q9C0C2	TB182_HUMAN	TNKS1BP1	182 kDa tankyrase-1-binding protein			1	4.13272e+06	MS/MS	STY:79.9663@AS(0.0725)RVPS(0.9332)S(0.9332)DEEVVEEPQS(0.0612)R;
ASSHSSQTQGGGSVTK	ASSHSSQT[79.9663]QGGGSVTK	R	K	402	417	16	2	8T(79.9663)	sp|P02545|LMNA_HUMAN	P02545	LMNA_HUMAN	LMNA	Prelamin-A/C		sp|P02545-2|LMNA_HUMAN, sp|P02545-3|LMNA_HUMAN, sp|P02545-4|LMNA_HUMAN, sp|P02545-5|LMNA_HUMAN, sp|P02545-6|LMNA_HUMAN	1	9414869	MS/MS	STY:79.9663@AS(0.0927)S(0.0927)HS(0.0190)S(0.0497)QT(0.2487)QGGGS(0.2487)VT(0.2487)K;
ASSHSSQTQGGGSVTK	ASSHS[79.9663]S[79.9663]QTQGGGSVTK	R	K	402	417	16	2	5S(79.9663),6S(79.9663)	sp|P02545|LMNA_HUMAN	P02545	LMNA_HUMAN	LMNA	Prelamin-A/C		sp|P02545-2|LMNA_HUMAN, sp|P02545-3|LMNA_HUMAN, sp|P02545-4|LMNA_HUMAN, sp|P02545-5|LMNA_HUMAN, sp|P02545-6|LMNA_HUMAN	1	1.03150864E8	MS/MS	STY:79.9663@AS(0.3785)S(0.3785)HS(0.4051)S(0.4051)QT(0.4051)QGGGS(0.0138)VT(0.0138)K;
ASVLDTSMSAGSGSPSK	ASVLDTSMS[79.9663]AGSGSPSK	R	T	510	526	17	2	9S(79.9663)	sp|Q9UPQ0-10|LIMC1_HUMAN	Q9UPQ0-10	LIMC1_HUMAN	LIMCH1	Isoform 10 of LIM and calponin homology domains-containing protein 1		sp|Q9UPQ0-2|LIMC1_HUMAN, sp|Q9UPQ0-3|LIMC1_HUMAN, sp|Q9UPQ0-4|LIMC1_HUMAN, sp|Q9UPQ0-5|LIMC1_HUMAN, sp|Q9UPQ0-6|LIMC1_HUMAN, sp|Q9UPQ0-8|LIMC1_HUMAN, sp|Q9UPQ0-9|LIMC1_HUMAN, sp|Q9UPQ0|LIMC1_HUMAN	1	0	MS/MS	STY:79.9663@AS(0.0092)VLDT(0.0146)S(0.0146)MS(0.2404)AGS(0.2404)GS(0.2404)PS(0.2404)K;
ASVVDPSTESSPAPQEGSEQPASPASPLSSR	ASVVDPSTESSPAPQEGSEQPAS[79.9663]PASPLSSR	K	Q	410	440	31	3	23S(79.9663)	sp|Q66K14-2|TBC9B_HUMAN	Q66K14-2	TBC9B_HUMAN	TBC1D9B	Isoform 2 of TBC1 domain family member 9B		sp|Q66K14|TBC9B_HUMAN	1	0	MS/MS	STY:79.9663@AS(0.0053)VVDPS(0.0053)T(0.0053)ES(0.0065)S(0.0065)PAPQEGS(0.0432)EQPAS(0.2320)PAS(0.2320)PLS(0.2320)S(0.2320)R;
ASYHFSPEELDENTSPLLGDAR	ASYHFSPEELDENT[79.9663]SPLLGDAR	K	F	262	283	22	3	14T(79.9663)	sp|O75410-2|TACC1_HUMAN	O75410-2	TACC1_HUMAN	TACC1	Isoform 2 of Transforming acidic coiled-coil-containing protein 1		sp|O75410-3|TACC1_HUMAN, sp|O75410-7|TACC1_HUMAN, sp|O75410-9|TACC1_HUMAN, sp|O75410|TACC1_HUMAN	1	1.11138e+06	MS/MS	STY:79.9663@AS(0.0344)Y(0.0344)HFS(0.0344)PEELDENT(0.4484)S(0.4484)PLLGDAR;
ASAVSELSPR	AS[79.9663]AVSELSPR	R	E	236	245	10	2	2S(79.9663)	sp|Q9Y2W1|TR150_HUMAN	Q9Y2W1	TR150_HUMAN	THRAP3	Thyroid hormone receptor-associated protein 3			4	1.7184782E7	MS/MS	STY:79.9663@AS(0.3412)AVS(0.3412)ELS(0.3175)PR;
ASDPDEAGGPEGSEAVQSGTPEEPEPELEAEASK	AS[79.9663]DPDEAGGPEGSEAVQSGTPEEPEPELEAEASK	R	E	192	225	34	3	2S(79.9663)	sp|O60936-3|NOL3_HUMAN	O60936-3	NOL3_HUMAN	NOL3	Isoform 3 of Nucleolar protein 3		sp|O60936|NOL3_HUMAN	2	5.63154e+06	MS/MS	STY:79.9663@AS(0.6538)DPDEAGGPEGS(0.0442)EAVQS(0.0368)GT(0.0210)PEEPEPELEAEAS(0.2442)K;
ASEDTTSGSPPKK	AS[79.9663]EDTTSGSPPKK	R	S	456	468	13	2	2S(79.9663)	sp|Q9BZZ5-1|API5_HUMAN	Q9BZZ5-1	API5_HUMAN	API5	Isoform 1 of Apoptosis inhibitor 5		sp|Q9BZZ5-2|API5_HUMAN, sp|Q9BZZ5-5|API5_HUMAN, sp|Q9BZZ5-6|API5_HUMAN, sp|Q9BZZ5|API5_HUMAN	2	5.07844e+06	MS/MS	STY:79.9663@AS(0.2000)EDT(0.2000)T(0.2000)S(0.2000)GS(0.2000)PPKK;
ASGDPGASGMSPR	AS[79.9663]GDPGASGMSPR	K	A	99	111	13	2	2S(79.9663)	sp|Q8NDT2|RB15B_HUMAN	Q8NDT2	RB15B_HUMAN	RBM15B	Putative RNA-binding protein 15B			1	0	MS/MS	STY:79.9663@AS(0.3407)GDPGAS(0.3407)GMS(0.3186)PR;
ASGQAFELILSPR	AS[79.9663]GQAFELILSPR	R	S	15	27	13	2	2S(79.9663)	sp|P16949-2|STMN1_HUMAN	P16949-2	STMN1_HUMAN	STMN1	Isoform 2 of Stathmin		sp|P16949|STMN1_HUMAN	1	2.832257E7	MS/MS	STY:79.9663@AS(0.7694)GQAFELILS(0.2306)PR;
ASGVAVSDGVIK	AS[79.9663]GVAVSDGVIK	M	V	2	13	12	2	2S(79.9663)	sp|P23528|COF1_HUMAN	P23528	COF1_HUMAN	CFL1	Cofilin-1			1	0	MS/MS	STY:79.9663@AS(0.5582)GVAVS(0.4418)DGVIK;
ASLGSLEGEAEAEASSPK	AS[79.9663]LGSLEGEAEAEASSPK	K	G	5748	5765	18	3	2S(79.9663)	sp|Q09666|AHNK_HUMAN	Q09666	AHNK_HUMAN	AHNAK	Neuroblast differentiation-associated protein AHNAK			1	1.06044e+06	MS/MS	STY:79.9663@AS(0.2500)LGS(0.2500)LEGEAEAEAS(0.2500)S(0.2500)PK;
ASPAPGSGHPEGPGAHLDMNSLDR	AS[79.9663]PAPGSGHPEGPGAHLDMNSLDR	R	A	90	113	24	3	2S(79.9663)	sp|O94826|TOM70_HUMAN	O94826	TOM70_HUMAN	TOMM70	Mitochondrial import receptor subunit TOM70			2	2.0568004E7	MS/MS	STY:79.9663@AS(0.4904)PAPGS(0.4904)GHPEGPGAHLDMNS(0.0192)LDR;
ASPPGDLQNPK	AS[79.9663]PPGDLQNPK	K	R	314	324	11	2	2S(79.9663)	sp|O00273|DFFA_HUMAN	O00273	DFFA_HUMAN	DFFA	DNA fragmentation factor subunit alpha			2	5935787	MS/MS	STY:79.9663@AS(1.0000)PPGDLQNPK;
ASRVPSSDEEVVEEPQSR	AS[79.9663]RVPS[79.9663]SDEEVVEEPQSR	R	R	1615	1632	18	2	2S(79.9663),6S(79.9663)	sp|Q9C0C2|TB182_HUMAN	Q9C0C2	TB182_HUMAN	TNKS1BP1	182 kDa tankyrase-1-binding protein			1	3794800	MS/MS	STY:79.9663@AS(0.6748)RVPS(0.6252)S(0.6252)DEEVVEEPQS(0.0747)R;
ASSHSSQTQGGGSVTK	AS[79.9663]SHSSQTQGGGSVTK	R	K	402	417	16	2	2S(79.9663)	sp|P02545|LMNA_HUMAN	P02545	LMNA_HUMAN	LMNA	Prelamin-A/C		sp|P02545-2|LMNA_HUMAN, sp|P02545-3|LMNA_HUMAN, sp|P02545-4|LMNA_HUMAN, sp|P02545-5|LMNA_HUMAN, sp|P02545-6|LMNA_HUMAN	5	9.2788232E7	MS/MS	STY:79.9663@AS(0.4341)S(0.4341)HS(0.0343)S(0.0145)QT(0.0145)QGGGS(0.0346)VT(0.0338)K;
ASSLEDLVLK	AS[79.9663]SLEDLVLK	R	E	254	263	10	2	2S(79.9663)	sp|Q15477|SKI2_HUMAN	Q15477	SKI2_HUMAN	SKIC2	Superkiller complex protein 2			3	1.1997838E7	MS/MS	STY:79.9663@AS(0.5000)S(0.5000)LEDLVLK;
ASSLGEIDESSELR	AS[79.9663]SLGEIDESSELR	R	V	565	578	14	2	2S(79.9663)	sp|Q16513-2|PKN2_HUMAN	Q16513-2	PKN2_HUMAN	PKN2	Isoform 2 of Serine/threonine-protein kinase N2		sp|Q16513-3|PKN2_HUMAN, sp|Q16513-4|PKN2_HUMAN, sp|Q16513-5|PKN2_HUMAN, sp|Q16513|PKN2_HUMAN	2	0	MS/MS	STY:79.9663@AS(0.4700)S(0.4700)LGEIDES(0.0300)S(0.0300)ELR;
ASSPPDRIDIFGR	AS[79.9663]SPPDRIDIFGR	R	T	75	87	13	2,3	2S(79.9663)	sp|Q9NWB6-2|ARGL1_HUMAN	Q9NWB6-2	ARGL1_HUMAN	ARGLU1	Isoform 2 of Arginine and glutamate-rich protein 1		sp|Q9NWB6|ARGL1_HUMAN	3	2.0509158E7	MS/MS	STY:79.9663@AS(0.5000)S(0.5000)PPDRIDIFGR;
ASSHSSQTQGGGSVTK	AS[79.9663]S[79.9663]HSSQTQGGGSVTK	R	K	402	417	16	2	2S(79.9663),3S(79.9663)	sp|P02545|LMNA_HUMAN	P02545	LMNA_HUMAN	LMNA	Prelamin-A/C		sp|P02545-2|LMNA_HUMAN, sp|P02545-3|LMNA_HUMAN, sp|P02545-4|LMNA_HUMAN, sp|P02545-5|LMNA_HUMAN, sp|P02545-6|LMNA_HUMAN	3	1.03150864E8	MS/MS	STY:79.9663@AS(0.3923)S(0.3923)HS(0.3923)S(0.3923)QT(0.3923)QGGGS(0.0193)VT(0.0193)K;
ATAPQTQHVSPMR	ATAPQTQHVS[79.9663]PMR	R	Q	124	136	13	2	10S(79.9663)	sp|P29692|EF1D_HUMAN	P29692	EF1D_HUMAN	EEF1D	Elongation factor 1-delta		sp|P29692-2|EF1D_HUMAN, sp|P29692-3|EF1D_HUMAN, sp|P29692-4|EF1D_HUMAN	6	4.3925264E7	MS/MS	STY:79.9663@AT(0.0301)APQT(0.0312)QHVS(0.9387)PMR;
ATAPQTQHVSPMRQVEPPAK	ATAPQTQHVS[79.9663]PMRQVEPPAK	R	K	124	143	20	3	10S(79.9663)	sp|P29692|EF1D_HUMAN	P29692	EF1D_HUMAN	EEF1D	Elongation factor 1-delta		sp|P29692-2|EF1D_HUMAN, sp|P29692-3|EF1D_HUMAN, sp|P29692-4|EF1D_HUMAN	1	2.6097176E7	MS/MS	STY:79.9663@AT(0.0326)APQT(0.0646)QHVS(0.9028)PMRQVEPPAK;
ATAPQTQHVSPMR	ATAPQTQHVS[79.9663]PM[15.9949]R	R	Q	124	136	13	2	10S(79.9663),12M(15.9949)	sp|P29692|EF1D_HUMAN	P29692	EF1D_HUMAN	EEF1D	Elongation factor 1-delta		sp|P29692-2|EF1D_HUMAN, sp|P29692-3|EF1D_HUMAN, sp|P29692-4|EF1D_HUMAN	1	0	MS/MS	STY:79.9663@AT(0.2832)APQT(0.2832)QHVS(0.4336)PMR;M:15.9949@ATAPQTQHVSPM(1.0000)R;
ATAPQTQHVSPMRQVEPPAK	ATAPQT[79.9663]QHVSPMRQVEPPAK	R	K	124	143	20	3	6T(79.9663)	sp|P29692|EF1D_HUMAN	P29692	EF1D_HUMAN	EEF1D	Elongation factor 1-delta		sp|P29692-2|EF1D_HUMAN, sp|P29692-3|EF1D_HUMAN, sp|P29692-4|EF1D_HUMAN	1	1.4350902E7	MS/MS	STY:79.9663@AT(0.0214)APQT(0.4893)QHVS(0.4893)PMRQVEPPAK;
ATVTPSPVK	ATVTPS[79.9663]PVK	K	G	176	184	9	2	6S(79.9663)	sp|Q9H1E3|NUCKS_HUMAN	Q9H1E3	NUCKS_HUMAN	NUCKS1	Nuclear ubiquitous casein and cyclin-dependent kinase substrate 1		sp|Q9H1E3-2|NUCKS_HUMAN	2	1.9380582E7	MS/MS	STY:79.9663@AT(0.0346)VT(0.0526)PS(0.9128)PVK;
ATVTPSPVK	ATVT[79.9663]PSPVK	K	G	176	184	9	2	4T(79.9663)	sp|Q9H1E3|NUCKS_HUMAN	Q9H1E3	NUCKS_HUMAN	NUCKS1	Nuclear ubiquitous casein and cyclin-dependent kinase substrate 1		sp|Q9H1E3-2|NUCKS_HUMAN	4	2.0605588E7	MS/MS	STY:79.9663@AT(0.0186)VT(0.4907)PS(0.4907)PVK;
ATVTPSPVK	ATVT[79.9663]PS[79.9663]PVK	K	G	176	184	9	2	4T(79.9663),6S(79.9663)	sp|Q9H1E3|NUCKS_HUMAN	Q9H1E3	NUCKS_HUMAN	NUCKS1	Nuclear ubiquitous casein and cyclin-dependent kinase substrate 1		sp|Q9H1E3-2|NUCKS_HUMAN	2	8276378	MS/MS	STY:79.9663@AT(0.1227)VT(0.9387)PS(0.9387)PVK;
ATAPQTQHVSPMR	AT[79.9663]APQTQHVSPMR	R	Q	124	136	13	2,3	2T(79.9663)	sp|P29692|EF1D_HUMAN	P29692	EF1D_HUMAN	EEF1D	Elongation factor 1-delta		sp|P29692-2|EF1D_HUMAN, sp|P29692-3|EF1D_HUMAN, sp|P29692-4|EF1D_HUMAN	3	2.6640506E7	MS/MS	STY:79.9663@AT(0.8180)APQT(0.0910)QHVS(0.0910)PMR;
ATAPQTQHVSPMRQVEPPAK	AT[79.9663]APQTQHVSPMRQVEPPAK	R	K	124	143	20	3	2T(79.9663)	sp|P29692|EF1D_HUMAN	P29692	EF1D_HUMAN	EEF1D	Elongation factor 1-delta		sp|P29692-2|EF1D_HUMAN, sp|P29692-3|EF1D_HUMAN, sp|P29692-4|EF1D_HUMAN	1	1.4350902E7	MS/MS	STY:79.9663@AT(0.3333)APQT(0.3333)QHVS(0.3333)PMRQVEPPAK;
ATAQPPAPLSPDSGSPSPDSGSASPVEEEDVGSSEK	AT[79.9663]AQPPAPLSPDSGSPSPDSGSASPVEEEDVGSSEK	R	L	15	50	36	3	2T(79.9663)	sp|O95361|TRI16_HUMAN	O95361	TRI16_HUMAN	TRIM16	Tripartite motif-containing protein 16			1	3055388	MS/MS	STY:79.9663@AT(0.4572)AQPPAPLS(0.4572)PDS(0.0140)GS(0.0140)PS(0.0140)PDS(0.0093)GS(0.0093)AS(0.0083)PVEEEDVGS(0.0083)S(0.0083)EK;
ATNESEDEIPQLVPIGK	AT[79.9663]NESEDEIPQLVPIGK	K	K	137	153	17	2	2T(79.9663)	sp|O76021-2|RL1D1_HUMAN	O76021-2	RL1D1_HUMAN	RSL1D1	Isoform 2 of Ribosomal L1 domain-containing protein 1		sp|O76021|RL1D1_HUMAN	5	4.0546744E7	MS/MS	STY:79.9663@AT(0.8723)NES(0.1277)EDEIPQLVPIGK;
ATVTPSPVK	AT[79.9663]VTPSPVK	K	G	176	184	9	2	2T(79.9663)	sp|Q9H1E3|NUCKS_HUMAN	Q9H1E3	NUCKS_HUMAN	NUCKS1	Nuclear ubiquitous casein and cyclin-dependent kinase substrate 1		sp|Q9H1E3-2|NUCKS_HUMAN	1	1.9380582E7	MS/MS	STY:79.9663@AT(0.3333)VT(0.3333)PS(0.3333)PVK;
ATVTPSPVK	AT[79.9663]VT[79.9663]PSPVK	K	G	176	184	9	2	2T(79.9663),4T(79.9663)	sp|Q9H1E3|NUCKS_HUMAN	Q9H1E3	NUCKS_HUMAN	NUCKS1	Nuclear ubiquitous casein and cyclin-dependent kinase substrate 1		sp|Q9H1E3-2|NUCKS_HUMAN	1	8276378	MS/MS	STY:79.9663@AT(0.6667)VT(0.6667)PS(0.6667)PVK;
AVEESSDEERQR	AVEES[79.9663]S[79.9663]DEERQR	K	D	138	149	12	2	5S(79.9663),6S(79.9663)	sp|Q9BW71|HIRP3_HUMAN	Q9BW71	HIRP3_HUMAN	HIRIP3	HIRA-interacting protein 3			1	1.252e+06	MS/MS	STY:79.9663@AVEES(1.0000)S(1.0000)DEERQR;
AVEYLLTGIPGSPEPEHGSVQESQVSEQPATEAGENPLEFLR	AVEYLLTGIPGS[79.9663]PEPEHGSVQESQVSEQPATEAGENPLEFLR	R	D	194	235	42	4	12S(79.9663)	sp|P54725-3|RD23A_HUMAN	P54725-3	RD23A_HUMAN	RAD23A	Isoform 3 of UV excision repair protein RAD23 homolog A			1	0	MS/MS	STY:79.9663@AVEY(0.0320)LLT(0.0834)GIPGS(0.7392)PEPEHGS(0.0588)VQES(0.0588)QVS(0.0140)EQPAT(0.0140)EAGENPLEFLR;
AVSPPHLDGPPSPRSPVIGSEVFLPNSNHVASGAGEAEER	AVS[79.9663]PPHLDGPPS[79.9663]PRSPVIGSEVFLPNS[79.9663]NHVASGAGEAEER	K	V	468	507	40	4	12S(79.9663),27S(79.9663),3S(79.9663)	sp|P29590-11|PML_HUMAN	P29590-11	PML_HUMAN	PML	Isoform PML-11 of Protein PML		sp|P29590-12|PML_HUMAN, sp|P29590-13|PML_HUMAN, sp|P29590-2|PML_HUMAN, sp|P29590-3|PML_HUMAN, sp|P29590-5|PML_HUMAN, sp|P29590-8|PML_HUMAN, sp|P29590-9|PML_HUMAN, sp|P29590|PML_HUMAN	1	0	MS/MS	STY:79.9663@AVS(0.7093)PPHLDGPPS(0.7063)PRS(0.3920)PVIGS(0.3920)EVFLPNS(0.7006)NHVAS(0.0999)GAGEAEER;
AVSPPHLDGPPSPRSPVIGSEVFLPNSNHVASGAGEAEER	AVS[79.9663]PPHLDGPPS[79.9663]PRS[79.9663]PVIGSEVFLPNSNHVASGAGEAEER	K	V	468	507	40	4	12S(79.9663),15S(79.9663),3S(79.9663)	sp|P29590-11|PML_HUMAN	P29590-11	PML_HUMAN	PML	Isoform PML-11 of Protein PML		sp|P29590-12|PML_HUMAN, sp|P29590-13|PML_HUMAN, sp|P29590-2|PML_HUMAN, sp|P29590-3|PML_HUMAN, sp|P29590-5|PML_HUMAN, sp|P29590-8|PML_HUMAN, sp|P29590-9|PML_HUMAN, sp|P29590|PML_HUMAN	1	9368184	MS/MS	STY:79.9663@AVS(0.8877)PPHLDGPPS(0.8855)PRS(0.8855)PVIGS(0.1364)EVFLPNS(0.1024)NHVAS(0.1024)GAGEAEER;
AVTTVTQSTPVPGPSVPPPEELQVSPGPR	AVTTVTQSTPVPGPSVPPPEELQVS[79.9663]PGPR	R	Q	1414	1442	29	3	25S(79.9663)	sp|P51610-2|HCFC1_HUMAN	P51610-2	HCFC1_HUMAN	HCFC1	Isoform 2 of Host cell factor 1		sp|P51610|HCFC1_HUMAN	1	3.46124e+06	MS/MS	STY:79.9663@AVT(0.0167)T(0.0167)VT(0.0167)QS(0.0167)T(0.0167)PVPGPS(0.0195)VPPPEELQVS(0.8969)PGPR;
AVTTVTQSTPVPGPSVPPPEELQVSPGPR	AVTTVTQSTPVPGPS[79.9663]VPPPEELQVSPGPR	R	Q	1414	1442	29	3	15S(79.9663)	sp|P51610-2|HCFC1_HUMAN	P51610-2	HCFC1_HUMAN	HCFC1	Isoform 2 of Host cell factor 1		sp|P51610|HCFC1_HUMAN	1	3.46124e+06	MS/MS	STY:79.9663@AVT(0.1202)T(0.1202)VT(0.1202)QS(0.0120)T(0.0120)PVPGPS(0.5314)VPPPEELQVS(0.0842)PGPR;
AYLGYQAVPSGSSGSLSTSSSSSPPGTPSPADAK	AYLGYQAVPSGSSGSLSTSSSS[79.9663]SPPGTPSPADAK	R	A	186	219	34	3	22S(79.9663)	sp|P17676-2|CEBPB_HUMAN	P17676-2	CEBPB_HUMAN	CEBPB	Isoform 2 of CCAAT/enhancer-binding protein beta		sp|P17676-3|CEBPB_HUMAN, sp|P17676|CEBPB_HUMAN	1	7015178	MS/MS	STY:79.9663@AY(0.0039)LGY(0.0039)QAVPS(0.0049)GS(0.0059)S(0.0059)GS(0.0059)LS(0.0059)T(0.0059)S(0.0059)S(0.0070)S(0.0070)S(0.2345)S(0.2345)PPGT(0.2345)PS(0.2345)PADAK;
AYLGYQAVPSGSSGSLSTSSSSSPPGTPSPADAK	AYLGYQAVPS[79.9663]GSSGSLSTSSSSSPPGTPSPADAK	R	A	186	219	34	3	10S(79.9663)	sp|P17676-2|CEBPB_HUMAN	P17676-2	CEBPB_HUMAN	CEBPB	Isoform 2 of CCAAT/enhancer-binding protein beta		sp|P17676-3|CEBPB_HUMAN, sp|P17676|CEBPB_HUMAN	1	7015178	MS/MS	STY:79.9663@AY(0.0018)LGY(0.0018)QAVPS(0.1210)GS(0.1210)S(0.1210)GS(0.1210)LS(0.0727)T(0.0727)S(0.0727)S(0.0727)S(0.0727)S(0.0727)S(0.0727)PPGT(0.0018)PS(0.0018)PADAK;
AYLGYQAVPSGSSGSLSTSSSSSPPGTPSPADAK	AY[79.9663]LGYQAVPSGSSGSLSTSSSSSPPGTPSPADAK	R	A	186	219	34	3	2Y(79.9663)	sp|P17676-2|CEBPB_HUMAN	P17676-2	CEBPB_HUMAN	CEBPB	Isoform 2 of CCAAT/enhancer-binding protein beta		sp|P17676-3|CEBPB_HUMAN, sp|P17676|CEBPB_HUMAN	2	1.0229454E7	MS/MS	STY:79.9663@AY(0.2652)LGY(0.2652)QAVPS(0.2652)GS(0.0089)S(0.0089)GS(0.0052)LS(0.0202)T(0.0202)S(0.0202)S(0.0202)S(0.0202)S(0.0202)S(0.0202)PPGT(0.0202)PS(0.0202)PADAK;
CDSSPDSAEDVRK	C[57.0215]DSSPDS[79.9663]AEDVRK	K	V	132	144	13	2,3	1C(57.0215),7S(79.9663)	sp|P02765|FETUA_HUMAN	P02765	FETUA_HUMAN	AHSG	Alpha-2-HS-glycoprotein			2	7234529	MS/MS	STY:79.9663@CDS(0.1403)S(0.1403)PDS(0.7194)AEDVRK;
CDSSPDSAEDVRK	C[57.0215]DSS[79.9663]PDSAEDVRK	K	V	132	144	13	2	1C(57.0215),4S(79.9663)	sp|P02765|FETUA_HUMAN	P02765	FETUA_HUMAN	AHSG	Alpha-2-HS-glycoprotein			1	0	MS/MS	STY:79.9663@CDS(0.0356)S(0.8916)PDS(0.0728)AEDVRK;
CDSSPDSAEDVRK	C[57.0215]DS[79.9663]SPDSAEDVRK	K	V	132	144	13	2	1C(57.0215),3S(79.9663)	sp|P02765|FETUA_HUMAN	P02765	FETUA_HUMAN	AHSG	Alpha-2-HS-glycoprotein			1	7234529	MS/MS	STY:79.9663@CDS(0.3333)S(0.3333)PDS(0.3333)AEDVRK;
CGSGPVHISGQHLVAVEEDAESEDEEEEDVK	C[57.0215]GSGPVHISGQHLVAVEEDAES[79.9663]EDEEEEDVK	K	L	104	134	31	3,4	1C(57.0215),22S(79.9663)	sp|P06748-2|NPM_HUMAN	P06748-2	NPM_HUMAN	NPM1	Isoform 2 of Nucleophosmin		sp|P06748-3|NPM_HUMAN, sp|P06748|NPM_HUMAN	51	1.24341504E9	MS/MS	STY:79.9663@CGS(0.0305)GPVHIS(0.0305)GQHLVAVEEDAES(0.9390)EDEEEEDVK;
CGSGPVHISGQHLVAVEEDAESEDEEEEDVK	C[57.0215]GSGPVHIS[79.9663]GQHLVAVEEDAESEDEEEEDVK	K	L	104	134	31	3	1C(57.0215),9S(79.9663)	sp|P06748-2|NPM_HUMAN	P06748-2	NPM_HUMAN	NPM1	Isoform 2 of Nucleophosmin		sp|P06748-3|NPM_HUMAN, sp|P06748|NPM_HUMAN	4	0	MS/MS	STY:79.9663@CGS(0.0611)GPVHIS(0.8791)GQHLVAVEEDAES(0.0598)EDEEEEDVK;
CGSGPVHISGQHLVAVEEDAESEDEEEEDVK	C[57.0215]GS[79.9663]GPVHISGQHLVAVEEDAESEDEEEEDVK	K	L	104	134	31	3,4	1C(57.0215),3S(79.9663)	sp|P06748-2|NPM_HUMAN	P06748-2	NPM_HUMAN	NPM1	Isoform 2 of Nucleophosmin		sp|P06748-3|NPM_HUMAN, sp|P06748|NPM_HUMAN	8	1.16169344E9	MS/MS	STY:79.9663@CGS(0.6321)GPVHIS(0.0504)GQHLVAVEEDAES(0.3175)EDEEEEDVK;
CPFPAGAALACCSEDEEDDEEHEGGGSR	C[57.0215]PFPAGAALAC[57.0215]C[57.0215]S[79.9663]EDEEDDEEHEGGGSR	R	S	27	54	28	3	11C(57.0215),12C(57.0215),13S(79.9663),1C(57.0215)	sp|Q147X3|NAA30_HUMAN	Q147X3	NAA30_HUMAN	NAA30	N-alpha-acetyltransferase 30			1	0	MS/MS	STY:79.9663@CPFPAGAALACCS(0.5000)EDEEDDEEHEGGGS(0.5000)R;
CPSPTMSLPSSWK	C[57.0215]PS[79.9663]PTMSLPSSWK	R	Y	508	520	13	2	1C(57.0215),3S(79.9663)	sp|Q8N3V7-2|SYNPO_HUMAN	Q8N3V7-2	SYNPO_HUMAN	SYNPO	Isoform 2 of Synaptopodin		sp|Q8N3V7-3|SYNPO_HUMAN, sp|Q8N3V7|SYNPO_HUMAN	1	1.40254e+06	MS/MS	STY:79.9663@CPS(0.6879)PT(0.0179)MS(0.0981)LPS(0.0981)S(0.0981)WK;
CQTAEADSESDHEVPEPESEMK	C[57.0215]QTAEADS[79.9663]ES[79.9663]DHEVPEPESEMK	R	M	966	987	22	3	10S(79.9663),1C(57.0215),8S(79.9663)	sp|Q9BPX3|CND3_HUMAN	Q9BPX3	CND3_HUMAN	NCAPG	Condensin complex subunit 3			1	6538282	MS/MS	STY:79.9663@CQT(0.0676)AEADS(0.6545)ES(0.6545)DHEVPEPES(0.6234)EMK;
CQTAEADSESDHEVPEPESEMK	C[57.0215]QT[79.9663]AEADSESDHEVPEPESEMK	R	M	966	987	22	3	1C(57.0215),3T(79.9663)	sp|Q9BPX3|CND3_HUMAN	Q9BPX3	CND3_HUMAN	NCAPG	Condensin complex subunit 3			1	1.56142e+06	MS/MS	STY:79.9663@CQT(0.4235)AEADS(0.1922)ES(0.1922)DHEVPEPES(0.1922)EMK;
CQTAEADSESDHEVPEPESEMK	C[57.0215]QT[79.9663]AEADSESDHEVPEPES[79.9663]EMK	R	M	966	987	22	3	19S(79.9663),1C(57.0215),3T(79.9663)	sp|Q9BPX3|CND3_HUMAN	Q9BPX3	CND3_HUMAN	NCAPG	Condensin complex subunit 3			1	6538282	MS/MS	STY:79.9663@CQT(0.4906)AEADS(0.4906)ES(0.4906)DHEVPEPES(0.5281)EMK;
CQTAEADSESDHEVPEPESEMK	C[57.0215]QT[79.9663]AEADSESDHEVPEPES[79.9663]EM[15.9949]K	R	M	966	987	22	3	19S(79.9663),1C(57.0215),21M(15.9949),3T(79.9663)	sp|Q9BPX3|CND3_HUMAN	Q9BPX3	CND3_HUMAN	NCAPG	Condensin complex subunit 3			1	1246191	MS/MS	STY:79.9663@CQT(0.4920)AEADS(0.4920)ES(0.4920)DHEVPEPES(0.5239)EMK;M:15.9949@CQTAEADSESDHEVPEPESEM(1.0000)K;
CQTAEADSESDHEVPEPESEMK	C[57.0215]QT[79.9663]AEADS[79.9663]ESDHEVPEPESEMK	R	M	966	987	22	3	1C(57.0215),3T(79.9663),8S(79.9663)	sp|Q9BPX3|CND3_HUMAN	Q9BPX3	CND3_HUMAN	NCAPG	Condensin complex subunit 3			1	6538282	MS/MS	STY:79.9663@CQT(0.5000)AEADS(0.5000)ES(0.5000)DHEVPEPES(0.5000)EMK;
CRSPGMLEPLGSSR	C[57.0215]RS[79.9663]PGMLEPLGSSR	R	T	2130	2143	14	2	1C(57.0215),3S(79.9663)	sp|Q9UQ35|SRRM2_HUMAN	Q9UQ35	SRRM2_HUMAN	SRRM2	Serine/arginine repetitive matrix protein 2			1	4.75295e+06	MS/MS	STY:79.9663@CRS(0.9214)PGMLEPLGS(0.0393)S(0.0393)R;
CSGPGLSPGMVR	C[57.0215]SGPGLS[79.9663]PGMVR	K	A	1453	1464	12	2	1C(57.0215),7S(79.9663)	sp|P21333-2|FLNA_HUMAN	P21333-2	FLNA_HUMAN	FLNA	Isoform 2 of Filamin-A		sp|P21333|FLNA_HUMAN	4	2.2074946E7	MS/MS	STY:79.9663@CS(0.0593)GPGLS(0.9407)PGMVR;
CSGPGLSPGMVR	C[57.0215]SGPGLS[79.9663]PGM[15.9949]VR	K	A	1453	1464	12	2	10M(15.9949),1C(57.0215),7S(79.9663)	sp|P21333-2|FLNA_HUMAN	P21333-2	FLNA_HUMAN	FLNA	Isoform 2 of Filamin-A		sp|P21333|FLNA_HUMAN	2	3748345	MS/MS	STY:79.9663@CS(0.0903)GPGLS(0.9097)PGMVR;M:15.9949@CSGPGLSPGM(1.0000)VR;
CSVSLSNVEAR	C[57.0215]SVSLS[79.9663]NVEAR	R	R	726	736	11	2	1C(57.0215),6S(79.9663)	sp|P47712|PA24A_HUMAN	P47712	PA24A_HUMAN	PLA2G4A	Cytosolic phospholipase A2			1	1.1425163E7	MS/MS	STY:79.9663@CS(0.0830)VS(0.0830)LS(0.8341)NVEAR;
CSVSLSNVEAR	C[57.0215]SVS[79.9663]LSNVEAR	R	R	726	736	11	2	1C(57.0215),4S(79.9663)	sp|P47712|PA24A_HUMAN	P47712	PA24A_HUMAN	PLA2G4A	Cytosolic phospholipase A2			3	1.1425163E7	MS/MS	STY:79.9663@CS(0.0437)VS(0.9251)LS(0.0312)NVEAR;
CSDVSELSSSPPGPYHQEPYVCKPEER	C[57.0215]S[79.9663]DVSELSSSPPGPYHQEPYVC[57.0215]KPEER	K	F	173	199	27	3	1C(57.0215),22C(57.0215),2S(79.9663)	sp|Q9Y478|AAKB1_HUMAN	Q9Y478	AAKB1_HUMAN	PRKAB1	5'-AMP-activated protein kinase subunit beta-1			2	4.06526e+06	MS/MS	STY:79.9663@CS(0.7809)DVS(0.0160)ELS(0.0442)S(0.0442)S(0.0343)PPGPY(0.0276)HQEPY(0.0527)VCKPEER;
CSGPGLSPGMVR	C[57.0215]S[79.9663]GPGLSPGMVR	K	A	1453	1464	12	2	1C(57.0215),2S(79.9663)	sp|P21333-2|FLNA_HUMAN	P21333-2	FLNA_HUMAN	FLNA	Isoform 2 of Filamin-A		sp|P21333|FLNA_HUMAN	3	2.2074946E7	MS/MS	STY:79.9663@CS(0.5000)GPGLS(0.5000)PGMVR;
CSVSLSNVEAR	C[57.0215]S[79.9663]VSLSNVEAR	R	R	726	736	11	2	1C(57.0215),2S(79.9663)	sp|P47712|PA24A_HUMAN	P47712	PA24A_HUMAN	PLA2G4A	Cytosolic phospholipase A2			1	1.1425163E7	MS/MS	STY:79.9663@CS(0.3333)VS(0.3333)LS(0.3333)NVEAR;
CTLPEHESPSQDISDACEAESTER	C[57.0215]T[79.9663]LPEHESPSQDISDAC[57.0215]EAESTER	R	C	702	725	24	3	17C(57.0215),1C(57.0215),2T(79.9663)	sp|Q32MZ4-2|LRRF1_HUMAN	Q32MZ4-2	LRRF1_HUMAN	LRRFIP1	Isoform 2 of Leucine-rich repeat flightless-interacting protein 1		sp|Q32MZ4-3|LRRF1_HUMAN, sp|Q32MZ4|LRRF1_HUMAN	1	0	MS/MS	STY:79.9663@CT(0.2470)LPEHES(0.2470)PS(0.2470)QDIS(0.2470)DACEAES(0.0060)T(0.0060)ER;
DAGGPRPESPVPAGR	DAGGPRPES[79.9663]PVPAGR	R	A	8	22	15	2	9S(79.9663)	sp|Q9BVG9|PTSS2_HUMAN	Q9BVG9	PTSS2_HUMAN	PTDSS2	Phosphatidylserine synthase 2			1	981461	MS/MS	STY:79.9663@DAGGPRPES(1.0000)PVPAGR;
DAHDVSPTSTDTEAQLTVER	DAHDVS[79.9663]PTSTDTEAQLTVER	R	Q	189	208	20	3	6S(79.9663)	sp|Q8IVF2-3|AHNK2_HUMAN	Q8IVF2-3	AHNK2_HUMAN	AHNAK2	Isoform 3 of Protein AHNAK2		sp|Q8IVF2|AHNK2_HUMAN	2	3.67027e+06	MS/MS	STY:79.9663@DAHDVS(0.4263)PT(0.4263)S(0.0631)T(0.0631)DT(0.0112)EAQLT(0.0099)VER;
DALGDSLQVPVSPSSTTSSR	DALGDSLQVPVS[79.9663]PSSTTSSR	R	C	372	391	20	2	12S(79.9663)	sp|Q9Y2D5-4|AKAP2_HUMAN	Q9Y2D5-4	AKAP2_HUMAN	AKAP2	Isoform 3 of A-kinase anchor protein 2		sp|Q9Y2D5-5|AKAP2_HUMAN, sp|Q9Y2D5-6|AKAP2_HUMAN, sp|Q9Y2D5-7|AKAP2_HUMAN, sp|Q9Y2D5|AKAP2_HUMAN	2	0	MS/MS	STY:79.9663@DALGDS(0.0033)LQVPVS(0.1424)PS(0.1424)S(0.1424)T(0.1424)T(0.1424)S(0.1424)S(0.1424)R;
DALGDSLQVPVSPSSTTSSR	DALGDS[79.9663]LQVPVSPSSTTSSR	R	C	372	391	20	2	6S(79.9663)	sp|Q9Y2D5-4|AKAP2_HUMAN	Q9Y2D5-4	AKAP2_HUMAN	AKAP2	Isoform 3 of A-kinase anchor protein 2		sp|Q9Y2D5-5|AKAP2_HUMAN, sp|Q9Y2D5-6|AKAP2_HUMAN, sp|Q9Y2D5-7|AKAP2_HUMAN, sp|Q9Y2D5|AKAP2_HUMAN	1	0	MS/MS	STY:79.9663@DALGDS(0.7884)LQVPVS(0.0588)PS(0.0117)S(0.0117)T(0.0323)T(0.0323)S(0.0323)S(0.0323)R;
DAPTSPASVASSSSTPSSK	DAPTSPASVAS[79.9663]SSSTPSSK	K	T	282	300	19	2	11S(79.9663)	sp|Q04726-2|TLE3_HUMAN	Q04726-2	TLE3_HUMAN	TLE3	Isoform 2 of Transducin-like enhancer protein 3		sp|Q04726-3|TLE3_HUMAN, sp|Q04726-4|TLE3_HUMAN, sp|Q04726-5|TLE3_HUMAN, sp|Q04726-6|TLE3_HUMAN, sp|Q04726-7|TLE3_HUMAN, sp|Q04726|TLE3_HUMAN	1	3244572	MS/MS	STY:79.9663@DAPT(0.0038)S(0.0042)PAS(0.0053)VAS(0.1410)S(0.1410)S(0.1410)S(0.1410)T(0.1410)PS(0.1410)S(0.1410)K;
DAPTSPASVASSSSTPSSK	DAPTSPAS[79.9663]VASSSSTPSSK	K	T	282	300	19	2	8S(79.9663)	sp|Q04726-2|TLE3_HUMAN	Q04726-2	TLE3_HUMAN	TLE3	Isoform 2 of Transducin-like enhancer protein 3		sp|Q04726-3|TLE3_HUMAN, sp|Q04726-4|TLE3_HUMAN, sp|Q04726-5|TLE3_HUMAN, sp|Q04726-6|TLE3_HUMAN, sp|Q04726-7|TLE3_HUMAN, sp|Q04726|TLE3_HUMAN	1	3.32591e+06	MS/MS	STY:79.9663@DAPT(0.0046)S(0.0046)PAS(0.1239)VAS(0.1239)S(0.1239)S(0.1239)S(0.1239)T(0.1239)PS(0.1239)S(0.1239)K;
DAPTSPASVASSSSTPSSK	DAPT[79.9663]SPASVASSSSTPSSK	K	T	282	300	19	2	4T(79.9663)	sp|Q04726-2|TLE3_HUMAN	Q04726-2	TLE3_HUMAN	TLE3	Isoform 2 of Transducin-like enhancer protein 3		sp|Q04726-3|TLE3_HUMAN, sp|Q04726-4|TLE3_HUMAN, sp|Q04726-5|TLE3_HUMAN, sp|Q04726-6|TLE3_HUMAN, sp|Q04726-7|TLE3_HUMAN, sp|Q04726|TLE3_HUMAN	1	2.99072e+06	MS/MS	STY:79.9663@DAPT(0.1244)S(0.1244)PAS(0.1244)VAS(0.1244)S(0.1244)S(0.1244)S(0.1244)T(0.1244)PS(0.0023)S(0.0023)K;
DAQRLSPIPEEVPK	DAQRLS[79.9663]PIPEEVPK	K	S	568	581	14	2,3	6S(79.9663)	sp|Q96T23-2|RSF1_HUMAN	Q96T23-2	RSF1_HUMAN	RSF1	Isoform 2 of Remodeling and spacing factor 1		sp|Q96T23-3|RSF1_HUMAN, sp|Q96T23|RSF1_HUMAN	2	7.96833e+06	MS/MS	STY:79.9663@DAQRLS(1.0000)PIPEEVPK;
DCDPGSPR	DC[57.0215]DPGS[79.9663]PR	K	R	906	913	8	2	2C(57.0215),6S(79.9663)	sp|Q00341-2|VIGLN_HUMAN	Q00341-2	VIGLN_HUMAN	HDLBP	Isoform 2 of Vigilin		sp|Q00341|VIGLN_HUMAN	1	0	MS/MS	STY:79.9663@DCDPGS(1.0000)PR;
DCRYALYDATYETK	DC[57.0215]RYALYDATY[79.9663]ETK	K	E	79	92	14	2	11Y(79.9663),2C(57.0215)	sp|P23528|COF1_HUMAN	P23528	COF1_HUMAN	CFL1	Cofilin-1			1	0	MS/MS	STY:79.9663@DCRY(0.0281)ALY(0.0281)DAT(0.0281)Y(0.4578)ET(0.4578)K;
DDDAYKTEDSDDIHFEPVVQMPEK	DDDAYKTEDS[79.9663]DDIHFEPVVQMPEK	K	V	1999	2022	24	3	10S(79.9663)	sp|P49792|RBP2_HUMAN	P49792	RBP2_HUMAN	RANBP2	E3 SUMO-protein ligase RanBP2	RGPD3, RGPD4, RGPD5, RGPD8	sp|A6NKT7|RGPD3_HUMAN, sp|O14715|RGPD8_HUMAN, sp|Q7Z3J3|RGPD4_HUMAN, sp|Q99666|RGPD5_HUMAN	1	0	MS/MS	STY:79.9663@DDDAY(0.1316)KT(0.1316)EDS(0.7367)DDIHFEPVVQMPEK;
DDDDIDLFGSDDEEESEEAK	DDDDIDLFGS[79.9663]DDEEESEEAK	K	R	97	116	20	2	10S(79.9663)	sp|P24534|EF1B_HUMAN	P24534	EF1B_HUMAN	EEF1B2	Elongation factor 1-beta			4	7.0417088E7	MS/MS	STY:79.9663@DDDDIDLFGS(0.9260)DDEEES(0.0740)EEAK;
DDDDIDLFGSDDEEESEEAKR	DDDDIDLFGS[79.9663]DDEEESEEAKR	K	L	97	117	21	3	10S(79.9663)	sp|P24534|EF1B_HUMAN	P24534	EF1B_HUMAN	EEF1B2	Elongation factor 1-beta			1	3432696	MS/MS	STY:79.9663@DDDDIDLFGS(0.6846)DDEEES(0.3154)EEAKR;
DDEEKPKIEDVGSDEEDDSGK	DDEEKPKIEDVGSDEEDDS[79.9663]GK	K	D	243	263	21	3	19S(79.9663)	sp|P08238|HS90B_HUMAN	P08238	HS90B_HUMAN	HSP90AB1	Heat shock protein HSP 90-beta	HSP90AB2P	sp|Q58FF8|H90B2_HUMAN	1	1.6030111E7	MS/MS	STY:79.9663@DDEEKPKIEDVGS(0.1293)DEEDDS(0.8707)GK;
DDEEKPKIEDVGSDEEDDSGK	DDEEKPKIEDVGS[79.9663]DEEDDSGK	K	D	243	263	21	3	13S(79.9663)	sp|P08238|HS90B_HUMAN	P08238	HS90B_HUMAN	HSP90AB1	Heat shock protein HSP 90-beta	HSP90AB2P	sp|Q58FF8|H90B2_HUMAN	2	1.6469574E7	MS/MS	STY:79.9663@DDEEKPKIEDVGS(0.9284)DEEDDS(0.0716)GK;
DDFESEEEDVK	DDFES[79.9663]EEEDVK	K	S	1290	1300	11	2	5S(79.9663)	sp|Q7Z6E9-2|RBBP6_HUMAN	Q7Z6E9-2	RBBP6_HUMAN	RBBP6	Isoform 2 of E3 ubiquitin-protein ligase RBBP6		sp|Q7Z6E9-4|RBBP6_HUMAN, sp|Q7Z6E9|RBBP6_HUMAN	1	0	MS/MS	STY:79.9663@DDFES(1.0000)EEEDVK;
DDQEWESPSPPKPTVFISGVIAR	DDQEWES[79.9663]PSPPKPTVFISGVIAR	K	G	43	65	23	3	7S(79.9663)	sp|P51397|DAP1_HUMAN	P51397	DAP1_HUMAN	DAP	Death-associated protein 1			1	5.53518e+06	MS/MS	STY:79.9663@DDQEWES(0.4801)PS(0.4801)PPKPT(0.0213)VFIS(0.0186)GVIAR;
DDSHSAEDSEDEKEDHK	DDSHSAEDS[79.9663]EDEKEDHK	K	N	71	87	17	3	9S(79.9663)	sp|Q9H1E3|NUCKS_HUMAN	Q9H1E3	NUCKS_HUMAN	NUCKS1	Nuclear ubiquitous casein and cyclin-dependent kinase substrate 1		sp|Q9H1E3-2|NUCKS_HUMAN	1	3.078036E7	MS/MS	STY:79.9663@DDS(0.1321)HS(0.1321)AEDS(0.7359)EDEKEDHK;
DDSHSAEDSEDEKEDHK	DDSHS[79.9663]AEDS[79.9663]EDEKEDHK	K	N	71	87	17	3	5S(79.9663),9S(79.9663)	sp|Q9H1E3|NUCKS_HUMAN	Q9H1E3	NUCKS_HUMAN	NUCKS1	Nuclear ubiquitous casein and cyclin-dependent kinase substrate 1		sp|Q9H1E3-2|NUCKS_HUMAN	1	3.7832868E7	MS/MS	STY:79.9663@DDS(0.1212)HS(0.9394)AEDS(0.9394)EDEKEDHK;
DDSHSAEDSEDEK	DDS[79.9663]HSAEDSEDEK	K	E	71	83	13	2	3S(79.9663)	sp|Q9H1E3|NUCKS_HUMAN	Q9H1E3	NUCKS_HUMAN	NUCKS1	Nuclear ubiquitous casein and cyclin-dependent kinase substrate 1		sp|Q9H1E3-2|NUCKS_HUMAN	1	3943922	MS/MS	STY:79.9663@DDS(0.3333)HS(0.3333)AEDS(0.3333)EDEK;
DDSHSAEDSEDEKEDHK	DDS[79.9663]HSAEDSEDEKEDHK	K	N	71	87	17	3	3S(79.9663)	sp|Q9H1E3|NUCKS_HUMAN	Q9H1E3	NUCKS_HUMAN	NUCKS1	Nuclear ubiquitous casein and cyclin-dependent kinase substrate 1		sp|Q9H1E3-2|NUCKS_HUMAN	1	3.078036E7	MS/MS	STY:79.9663@DDS(0.3333)HS(0.3333)AEDS(0.3333)EDEKEDHK;
DDSHSAEDSEDEK	DDS[79.9663]HSAEDS[79.9663]EDEK	K	E	71	83	13	2	3S(79.9663),9S(79.9663)	sp|Q9H1E3|NUCKS_HUMAN	Q9H1E3	NUCKS_HUMAN	NUCKS1	Nuclear ubiquitous casein and cyclin-dependent kinase substrate 1		sp|Q9H1E3-2|NUCKS_HUMAN	2	2.5644368E7	MS/MS	STY:79.9663@DDS(0.8563)HS(0.2865)AEDS(0.8573)EDEK;
DDSHSAEDSEDEKEDHK	DDS[79.9663]HSAEDS[79.9663]EDEKEDHK	K	N	71	87	17	2,3	3S(79.9663),9S(79.9663)	sp|Q9H1E3|NUCKS_HUMAN	Q9H1E3	NUCKS_HUMAN	NUCKS1	Nuclear ubiquitous casein and cyclin-dependent kinase substrate 1		sp|Q9H1E3-2|NUCKS_HUMAN	2	6.1563884E7	MS/MS	STY:79.9663@DDS(0.6576)HS(0.6576)AEDS(0.6847)EDEKEDHK;
DDSHSAEDSEDEKEDHK	DDS[79.9663]HS[79.9663]AEDSEDEKEDHK	K	N	71	87	17	2,3	3S(79.9663),5S(79.9663)	sp|Q9H1E3|NUCKS_HUMAN	Q9H1E3	NUCKS_HUMAN	NUCKS1	Nuclear ubiquitous casein and cyclin-dependent kinase substrate 1		sp|Q9H1E3-2|NUCKS_HUMAN	3	7.2862584E7	MS/MS	STY:79.9663@DDS(0.6667)HS(0.6667)AEDS(0.6667)EDEKEDHK;
DDSHSAEDSEDEK	DDS[79.9663]HS[79.9663]AEDS[79.9663]EDEK	K	E	71	83	13	2	3S(79.9663),5S(79.9663),9S(79.9663)	sp|Q9H1E3|NUCKS_HUMAN	Q9H1E3	NUCKS_HUMAN	NUCKS1	Nuclear ubiquitous casein and cyclin-dependent kinase substrate 1		sp|Q9H1E3-2|NUCKS_HUMAN	1	0	MS/MS	STY:79.9663@DDS(1.0000)HS(1.0000)AEDS(1.0000)EDEK;
DDSHSAEDSEDEKEDHK	DDS[79.9663]HS[79.9663]AEDS[79.9663]EDEKEDHK	K	N	71	87	17	2,3	3S(79.9663),5S(79.9663),9S(79.9663)	sp|Q9H1E3|NUCKS_HUMAN	Q9H1E3	NUCKS_HUMAN	NUCKS1	Nuclear ubiquitous casein and cyclin-dependent kinase substrate 1		sp|Q9H1E3-2|NUCKS_HUMAN	2	2.9413112E7	MS/MS	STY:79.9663@DDS(1.0000)HS(1.0000)AEDS(1.0000)EDEKEDHK;
DEILPTTPISEQK	DEILPTT[79.9663]PISEQK	K	G	231	243	13	2	7T(79.9663)	sp|P23396-2|RS3_HUMAN	P23396-2	RS3_HUMAN	RPS3	Isoform 2 of Small ribosomal subunit protein uS3		sp|P23396|RS3_HUMAN	1	7.39471e+06	MS/MS	STY:79.9663@DEILPT(0.0653)T(0.9049)PIS(0.0298)EQK;
DEILPTTPISEQK	DEILPT[79.9663]TPISEQK	K	G	231	243	13	2	6T(79.9663)	sp|P23396-2|RS3_HUMAN	P23396-2	RS3_HUMAN	RPS3	Isoform 2 of Small ribosomal subunit protein uS3		sp|P23396|RS3_HUMAN	2	7.39471e+06	MS/MS	STY:79.9663@DEILPT(0.4901)T(0.4901)PIS(0.0198)EQK;
DELHIVEAEAMNYEGSPIK	DELHIVEAEAMNYEGS[79.9663]PIK	K	V	55	73	19	2,3	16S(79.9663)	sp|P06748-2|NPM_HUMAN	P06748-2	NPM_HUMAN	NPM1	Isoform 2 of Nucleophosmin		sp|P06748-3|NPM_HUMAN, sp|P06748|NPM_HUMAN	5	1.74724432E8	MS/MS	STY:79.9663@DELHIVEAEAMNY(0.0642)EGS(0.9358)PIK;
DELHIVEAEAMNYEGSPIK	DELHIVEAEAMNY[79.9663]EGSPIK	K	V	55	73	19	2,3	13Y(79.9663)	sp|P06748-2|NPM_HUMAN	P06748-2	NPM_HUMAN	NPM1	Isoform 2 of Nucleophosmin		sp|P06748-3|NPM_HUMAN, sp|P06748|NPM_HUMAN	5	1.74724432E8	MS/MS	STY:79.9663@DELHIVEAEAMNY(0.9191)EGS(0.0809)PIK;
DELHIVEAEAMNYEGSPIK	DELHIVEAEAM[15.9949]NYEGS[79.9663]PIK	K	V	55	73	19	2,3	11M(15.9949),16S(79.9663)	sp|P06748-2|NPM_HUMAN	P06748-2	NPM_HUMAN	NPM1	Isoform 2 of Nucleophosmin		sp|P06748-3|NPM_HUMAN, sp|P06748|NPM_HUMAN	3	3.2661172E7	MS/MS	STY:79.9663@DELHIVEAEAMNY(0.1498)EGS(0.8502)PIK;M:15.9949@DELHIVEAEAM(1.0000)NYEGSPIK;
DELHIVEAEAMNYEGSPIK	DELHIVEAEAM[15.9949]NY[79.9663]EGSPIK	K	V	55	73	19	2,3	11M(15.9949),13Y(79.9663)	sp|P06748-2|NPM_HUMAN	P06748-2	NPM_HUMAN	NPM1	Isoform 2 of Nucleophosmin		sp|P06748-3|NPM_HUMAN, sp|P06748|NPM_HUMAN	7	3.2661172E7	MS/MS	STY:79.9663@DELHIVEAEAMNY(0.8320)EGS(0.1680)PIK;M:15.9949@DELHIVEAEAM(1.0000)NYEGSPIK;
DELTDLDQSNVTEETPEGEEHHPVADTENK	DELTDLDQSNVTEETPEGEEHHPVADT[79.9663]ENK	K	E	229	258	30	3	27T(79.9663)	sp|Q8NC51-3|SERB1_HUMAN	Q8NC51-3	SERB1_HUMAN	SERBP1	Isoform 3 of SERPINE1 mRNA-binding protein 1		sp|Q8NC51-4|SERB1_HUMAN	2	1.0136028E7	MS/MS	STY:79.9663@DELT(0.1781)DLDQS(0.0694)NVT(0.0694)EET(0.0694)PEGEEHHPVADT(0.6137)ENK;
DELTDLDQSNVTEETPEGEEHHPVADTENK	DELTDLDQSNVT[79.9663]EETPEGEEHHPVADTENK	K	E	229	258	30	3	12T(79.9663)	sp|Q8NC51-3|SERB1_HUMAN	Q8NC51-3	SERB1_HUMAN	SERBP1	Isoform 3 of SERPINE1 mRNA-binding protein 1		sp|Q8NC51-4|SERB1_HUMAN	1	7.97406e+06	MS/MS	STY:79.9663@DELT(0.0235)DLDQS(0.0644)NVT(0.4372)EET(0.4372)PEGEEHHPVADT(0.0376)ENK;
DENERASVSPMDEPVPDSESPIEK	DENERAS[79.9663]VSPMDEPVPDSESPIEK	K	V	1370	1393	24	3	7S(79.9663)	sp|P46821|MAP1B_HUMAN	P46821	MAP1B_HUMAN	MAP1B	Microtubule-associated protein 1B			1	281230	MS/MS	STY:79.9663@DENERAS(0.2500)VS(0.2500)PMDEPVPDS(0.2500)ES(0.2500)PIEK;
DFQEYVEPGEDFPASPQRR	DFQEYVEPGEDFPAS[79.9663]PQRR	R	N	193	211	19	3	15S(79.9663)	sp|Q9Y6G9|DC1L1_HUMAN	Q9Y6G9	DC1L1_HUMAN	DYNC1LI1	Cytoplasmic dynein 1 light intermediate chain 1			1	1.663064E7	MS/MS	STY:79.9663@DFQEY(0.2587)VEPGEDFPAS(0.7413)PQRR;
DFQEYVEPGEDFPASPQRR	DFQEY[79.9663]VEPGEDFPASPQRR	R	N	193	211	19	3	5Y(79.9663)	sp|Q9Y6G9|DC1L1_HUMAN	Q9Y6G9	DC1L1_HUMAN	DYNC1LI1	Cytoplasmic dynein 1 light intermediate chain 1			2	1.6381244E7	MS/MS	STY:79.9663@DFQEY(0.7606)VEPGEDFPAS(0.2394)PQRR;
DGDKSPMSSLQISNEK	DGDKS[79.9663]PMSSLQISNEK	K	N	491	506	16	2	5S(79.9663)	sp|Q9UER7-2|DAXX_HUMAN	Q9UER7-2	DAXX_HUMAN	DAXX	Isoform 2 of Death domain-associated protein 6		sp|Q9UER7-3|DAXX_HUMAN, sp|Q9UER7-4|DAXX_HUMAN, sp|Q9UER7-5|DAXX_HUMAN, sp|Q9UER7|DAXX_HUMAN	1	0	MS/MS	STY:79.9663@DGDKS(0.3287)PMS(0.3287)S(0.3287)LQIS(0.0138)NEK;
DGDSYDPYDFSDTEEEMPQVHTPK	DGDSYDPYDFSDT[79.9663]EEEMPQVHTPK	K	T	746	769	24	3	13T(79.9663)	sp|P25205-2|MCM3_HUMAN	P25205-2	MCM3_HUMAN	MCM3	Isoform 2 of DNA replication licensing factor MCM3		sp|P25205|MCM3_HUMAN	1	5.75081e+06	MS/MS	STY:79.9663@DGDS(0.0096)Y(0.0096)DPY(0.0266)DFS(0.0452)DT(0.4715)EEEMPQVHT(0.4375)PK;
DGDSYDPYDFSDTEEEMPQVHTPK	DGDSYDPYDFS[79.9663]DTEEEM[15.9949]PQVHTPK	K	T	746	769	24	3	11S(79.9663),17M(15.9949)	sp|P25205-2|MCM3_HUMAN	P25205-2	MCM3_HUMAN	MCM3	Isoform 2 of DNA replication licensing factor MCM3		sp|P25205|MCM3_HUMAN	1	2815630	MS/MS	STY:79.9663@DGDS(0.0081)Y(0.0081)DPY(0.0401)DFS(0.3747)DT(0.3747)EEEMPQVHT(0.1943)PK;M:15.9949@DGDSYDPYDFSDTEEEM(1.0000)PQVHTPK;
DGDSYDPYDFSDTEEEMPQVHTPK	DGDSYDPY[79.9663]DFSDTEEEMPQVHTPK	K	T	746	769	24	3	8Y(79.9663)	sp|P25205-2|MCM3_HUMAN	P25205-2	MCM3_HUMAN	MCM3	Isoform 2 of DNA replication licensing factor MCM3		sp|P25205|MCM3_HUMAN	3	1.3476056E7	MS/MS	STY:79.9663@DGDS(0.0330)Y(0.0330)DPY(0.8713)DFS(0.0227)DT(0.0227)EEEMPQVHT(0.0173)PK;
DGDSYDPYDFSDTEEEMPQVHTPK	DGDSYDPY[79.9663]DFSDTEEEMPQVHT[79.9663]PK	K	T	746	769	24	3	22T(79.9663),8Y(79.9663)	sp|P25205-2|MCM3_HUMAN	P25205-2	MCM3_HUMAN	MCM3	Isoform 2 of DNA replication licensing factor MCM3		sp|P25205|MCM3_HUMAN	1	1.6293389E7	MS/MS	STY:79.9663@DGDS(0.0275)Y(0.0275)DPY(0.4699)DFS(0.4699)DT(0.4699)EEEMPQVHT(0.5353)PK;
DGDSYDPYDFSDTEEEMPQVHTPK	DGDS[79.9663]YDPYDFSDTEEEMPQVHTPK	K	T	746	769	24	3	4S(79.9663)	sp|P25205-2|MCM3_HUMAN	P25205-2	MCM3_HUMAN	MCM3	Isoform 2 of DNA replication licensing factor MCM3		sp|P25205|MCM3_HUMAN	1	7.63884e+06	MS/MS	STY:79.9663@DGDS(0.3112)Y(0.3112)DPY(0.3112)DFS(0.0390)DT(0.0158)EEEMPQVHT(0.0115)PK;
DGDSYDPYDFSDTEEEMPQVHTPK	DGDS[79.9663]YDPYDFSDTEEEM[15.9949]PQVHT[79.9663]PK	K	T	746	769	24	3	17M(15.9949),22T(79.9663),4S(79.9663)	sp|P25205-2|MCM3_HUMAN	P25205-2	MCM3_HUMAN	MCM3	Isoform 2 of DNA replication licensing factor MCM3		sp|P25205|MCM3_HUMAN	1	5115289	MS/MS	STY:79.9663@DGDS(0.4327)Y(0.4327)DPY(0.4327)DFS(0.1022)DT(0.1022)EEEMPQVHT(0.4975)PK;M:15.9949@DGDSYDPYDFSDTEEEM(1.0000)PQVHTPK;
DGDSYDPYDFSDTEEEMPQVHTPK	DGDS[79.9663]YDPYDFS[79.9663]DTEEEMPQVHTPK	K	T	746	769	24	3	11S(79.9663),4S(79.9663)	sp|P25205-2|MCM3_HUMAN	P25205-2	MCM3_HUMAN	MCM3	Isoform 2 of DNA replication licensing factor MCM3		sp|P25205|MCM3_HUMAN	1	0	MS/MS	STY:79.9663@DGDS(0.3414)Y(0.3414)DPY(0.3414)DFS(0.3455)DT(0.2931)EEEMPQVHT(0.3370)PK;
DGDSYDPYDFSDTEEEMPQVHTPK	DGDS[79.9663]Y[79.9663]DPYDFSDTEEEMPQVHT[79.9663]PK	K	T	746	769	24	3	22T(79.9663),4S(79.9663),5Y(79.9663)	sp|P25205-2|MCM3_HUMAN	P25205-2	MCM3_HUMAN	MCM3	Isoform 2 of DNA replication licensing factor MCM3		sp|P25205|MCM3_HUMAN	1	0	MS/MS	STY:79.9663@DGDS(0.5590)Y(0.5590)DPY(0.1597)DFS(0.5590)DT(0.5590)EEEMPQVHT(0.6042)PK;
DGQDAIAQSPEK	DGQDAIAQS[79.9663]PEK	K	E	281	292	12	2	9S(79.9663)	sp|Q9NWH9|SLTM_HUMAN	Q9NWH9	SLTM_HUMAN	SLTM	SAFB-like transcription modulator			7	7752346	MS/MS	STY:79.9663@DGQDAIAQS(1.0000)PEK;
DGTAPPPQSPGSPGTGQDEEWSDEESPRK	DGTAPPPQSPGSPGTGQDEEWS[79.9663]DEESPRK	R	A	333	361	29	3	22S(79.9663)	sp|Q9UKS6|PACN3_HUMAN	Q9UKS6	PACN3_HUMAN	PACSIN3	Protein kinase C and casein kinase substrate in neurons protein 3			1	2.0566992E7	MS/MS	STY:79.9663@DGT(0.0115)APPPQS(0.0115)PGS(0.0115)PGT(0.0621)GQDEEWS(0.4517)DEES(0.4517)PRK;
DGVLTLANNVTPAK	DGVLTLANNVT[79.9663]PAK	K	D	561	574	14	2	11T(79.9663)	sp|P27816-6|MAP4_HUMAN	P27816-6	MAP4_HUMAN	MAP4	Isoform 6 of Microtubule-associated protein 4		sp|P27816|MAP4_HUMAN	1	0	MS/MS	STY:79.9663@DGVLT(0.3963)LANNVT(0.6037)PAK;
DHFGLEGDEESTMLEDSVSPKK	DHFGLEGDEESTMLEDS[79.9663]VSPKK	K	S	407	428	22	3	17S(79.9663)	sp|Q9Y490|TLN1_HUMAN	Q9Y490	TLN1_HUMAN	TLN1	Talin-1			1	5.24321e+06	MS/MS	STY:79.9663@DHFGLEGDEES(0.0157)T(0.0157)MLEDS(0.4843)VS(0.4843)PKK;
DHFYSDDDAIEADSEGDAEPCDK	DHFY[79.9663]SDDDAIEADS[79.9663]EGDAEPC[57.0215]DK	K	E	54	76	23	3	14S(79.9663),21C(57.0215),4Y(79.9663)	sp|Q9Y3B9|RRP15_HUMAN	Q9Y3B9	RRP15_HUMAN	RRP15	RRP15-like protein			2	0	MS/MS	STY:79.9663@DHFY(0.7802)S(0.4391)DDDAIEADS(0.7807)EGDAEPCDK;
DHFYSDDDAIEADSEGDAEPCDK	DHFY[79.9663]S[79.9663]DDDAIEADSEGDAEPC[57.0215]DK	K	E	54	76	23	3	21C(57.0215),4Y(79.9663),5S(79.9663)	sp|Q9Y3B9|RRP15_HUMAN	Q9Y3B9	RRP15_HUMAN	RRP15	RRP15-like protein			1	0	MS/MS	STY:79.9663@DHFY(0.7666)S(0.7666)DDDAIEADS(0.4668)EGDAEPCDK;
DHGFEVASTSPEDESPGSNPEPDATPFQEGLR	DHGFEVAS[79.9663]TSPEDESPGSNPEPDATPFQEGLR	K	T	143	174	32	3	8S(79.9663)	sp|P55211-2|CASP9_HUMAN	P55211-2	CASP9_HUMAN	CASP9	Isoform 2 of Caspase-9		sp|P55211-4|CASP9_HUMAN, sp|P55211|CASP9_HUMAN	1	0	MS/MS	STY:79.9663@DHGFEVAS(0.2270)T(0.2270)S(0.2270)PEDES(0.2270)PGS(0.0459)NPEPDAT(0.0459)PFQEGLR;
DHNSEDEDEDKYADDIDMPGQNFDSK	DHNSEDEDEDKY[79.9663]ADDIDMPGQNFDSK	K	R	232	257	26	3	12Y(79.9663)	sp|O95391|SLU7_HUMAN	O95391	SLU7_HUMAN	SLU7	Pre-mRNA-splicing factor SLU7			1	0	MS/MS	STY:79.9663@DHNS(0.3666)EDEDEDKY(0.4938)ADDIDMPGQNFDS(0.1396)K;
DHTVSGDEDYCPR	DHT[79.9663]VSGDEDYC[57.0215]PR	K	S	939	951	13	2	11C(57.0215),3T(79.9663)	sp|Q9UIG0-2|BAZ1B_HUMAN	Q9UIG0-2	BAZ1B_HUMAN	BAZ1B	Isoform 2 of Tyrosine-protein kinase BAZ1B		sp|Q9UIG0|BAZ1B_HUMAN	1	0	MS/MS	STY:79.9663@DHT(0.4357)VS(0.4357)GDEDY(0.1287)CPR;
DIDHETVVEEQIIGENSPPDYSEYMTGK	DIDHETVVEEQIIGENS[79.9663]PPDYSEYMTGK	K	K	231	258	28	3	17S(79.9663)	sp|P25490|TYY1_HUMAN	P25490	TYY1_HUMAN	YY1	Transcriptional repressor protein YY1			2	0	MS/MS	STY:79.9663@DIDHET(0.0134)VVEEQIIGENS(0.8944)PPDY(0.0231)S(0.0231)EY(0.0231)MT(0.0231)GK;
DIDHETVVEEQIIGENSPPDYSEYMTGK	DIDHET[79.9663]VVEEQIIGENSPPDYSEYM[15.9949]TGK	K	K	231	258	28	3	25M(15.9949),6T(79.9663)	sp|P25490|TYY1_HUMAN	P25490	TYY1_HUMAN	YY1	Transcriptional repressor protein YY1			1	1.3707e+06	MS/MS	STY:79.9663@DIDHET(0.4482)VVEEQIIGENS(0.4482)PPDY(0.0259)S(0.0259)EY(0.0259)MT(0.0259)GK;M:15.9949@DIDHETVVEEQIIGENSPPDYSEYM(1.0000)TGK;
DIDISSPEFK	DIDISS[79.9663]PEFK	K	I	172	181	10	2	6S(79.9663)	sp|Q09666|AHNK_HUMAN	Q09666	AHNK_HUMAN	AHNAK	Neuroblast differentiation-associated protein AHNAK			1	6304498	MS/MS	STY:79.9663@DIDIS(0.0620)S(0.9380)PEFK;
DIDISSPEFK	DIDIS[79.9663]SPEFK	K	I	172	181	10	2	5S(79.9663)	sp|Q09666|AHNK_HUMAN	Q09666	AHNK_HUMAN	AHNAK	Neuroblast differentiation-associated protein AHNAK			1	6304498	MS/MS	STY:79.9663@DIDIS(0.5000)S(0.5000)PEFK;
DIGSESTEDQAMEDIK	DIGSES[79.9663]TEDQAMEDIK	K	Q	58	73	16	2	6S(79.9663)	sp|P02662|CASA1_BOVIN	P02662	CASA1_BOVIN	CSN1S1	Alpha-S1-casein			1	2.6831108E7	MS/MS	STY:79.9663@DIGS(0.0616)ES(0.9086)T(0.0298)EDQAMEDIK;
DIGSESTEDQAMEDIK	DIGSES[79.9663]T[79.9663]EDQAMEDIK	K	Q	58	73	16	2	6S(79.9663),7T(79.9663)	sp|P02662|CASA1_BOVIN	P02662	CASA1_BOVIN	CSN1S1	Alpha-S1-casein			2	3.27525632E8	MS/MS	STY:79.9663@DIGS(0.1861)ES(0.9069)T(0.9069)EDQAMEDIK;
DIGSESTEDQAMEDIK	DIGSES[79.9663]T[79.9663]EDQAM[15.9949]EDIK	K	Q	58	73	16	2	12M(15.9949),6S(79.9663),7T(79.9663)	sp|P02662|CASA1_BOVIN	P02662	CASA1_BOVIN	CSN1S1	Alpha-S1-casein			1	2.9847282E7	MS/MS	STY:79.9663@DIGS(0.4995)ES(0.7502)T(0.7502)EDQAMEDIK;M:15.9949@DIGSESTEDQAM(1.0000)EDIK;
DIGSESTEDQAMEDIK	DIGS[79.9663]ESTEDQAMEDIK	K	Q	58	73	16	2	4S(79.9663)	sp|P02662|CASA1_BOVIN	P02662	CASA1_BOVIN	CSN1S1	Alpha-S1-casein			4	2.6831108E7	MS/MS	STY:79.9663@DIGS(0.9090)ES(0.0455)T(0.0455)EDQAMEDIK;
DIGSESTEDQAMEDIK	DIGS[79.9663]ESTEDQAM[15.9949]EDIK	K	Q	58	73	16	2	12M(15.9949),4S(79.9663)	sp|P02662|CASA1_BOVIN	P02662	CASA1_BOVIN	CSN1S1	Alpha-S1-casein			6	3.1650388E7	MS/MS	STY:79.9663@DIGS(0.9363)ES(0.0319)T(0.0319)EDQAMEDIK;M:15.9949@DIGSESTEDQAM(1.0000)EDIK;
DIGSESTEDQAMEDIK	DIGS[79.9663]EST[79.9663]EDQAMEDIK	K	Q	58	73	16	2	4S(79.9663),7T(79.9663)	sp|P02662|CASA1_BOVIN	P02662	CASA1_BOVIN	CSN1S1	Alpha-S1-casein			7	3.27525632E8	MS/MS	STY:79.9663@DIGS(0.7954)ES(0.4071)T(0.7976)EDQAMEDIK;
DIGSESTEDQAMEDIK	DIGS[79.9663]EST[79.9663]EDQAM[15.9949]EDIK	K	Q	58	73	16	2	12M(15.9949),4S(79.9663),7T(79.9663)	sp|P02662|CASA1_BOVIN	P02662	CASA1_BOVIN	CSN1S1	Alpha-S1-casein			1	0	MS/MS	STY:79.9663@DIGS(0.6581)ES(0.6581)T(0.6837)EDQAMEDIK;M:15.9949@DIGSESTEDQAM(1.0000)EDIK;
DIGSESTEDQAMEDIK	DIGS[79.9663]ES[79.9663]TEDQAMEDIK	K	Q	58	73	16	2	4S(79.9663),6S(79.9663)	sp|P02662|CASA1_BOVIN	P02662	CASA1_BOVIN	CSN1S1	Alpha-S1-casein			35	3.27525632E8	MS/MS	STY:79.9663@DIGS(0.9243)ES(0.9243)T(0.1514)EDQAMEDIK;
DIGSESTEDQAMEDIK	DIGS[79.9663]ES[79.9663]TEDQAM[15.9949]EDIK	K	Q	58	73	16	2	12M(15.9949),4S(79.9663),6S(79.9663)	sp|P02662|CASA1_BOVIN	P02662	CASA1_BOVIN	CSN1S1	Alpha-S1-casein			45	3.854392E8	MS/MS	STY:79.9663@DIGS(0.9366)ES(0.9366)T(0.1268)EDQAMEDIK;M:15.9949@DIGSESTEDQAM(1.0000)EDIK;
DIIRQPSEEEIIK	DIIRQPS[79.9663]EEEIIK	K	L	131	143	13	2	7S(79.9663)	sp|Q15121-2|PEA15_HUMAN	Q15121-2	PEA15_HUMAN	PEA15	Isoform 2 of Astrocytic phosphoprotein PEA-15		sp|Q15121|PEA15_HUMAN	3	1.1977296E7	MS/MS	STY:79.9663@DIIRQPS(1.0000)EEEIIK;
DISGPSPSK	DIS[79.9663]GPSPSK	K	K	44	52	9	2	3S(79.9663)	sp|Q96GX9-3|MTNB_HUMAN	Q96GX9-3	MTNB_HUMAN	APIP	Isoform 2 of Methylthioribulose-1-phosphate dehydratase		sp|Q96GX9|MTNB_HUMAN	1	1.79703e+06	MS/MS	STY:79.9663@DIS(0.3333)GPS(0.3333)PS(0.3333)K;
DKDDQEWESPSPPKPTVFISGVIAR	DKDDQEWESPSPPKPTVFIS[79.9663]GVIAR	K	G	41	65	25	3	20S(79.9663)	sp|P51397|DAP1_HUMAN	P51397	DAP1_HUMAN	DAP	Death-associated protein 1			1	6.0630496E7	MS/MS	STY:79.9663@DKDDQEWES(0.0418)PS(0.0524)PPKPT(0.0264)VFIS(0.8794)GVIAR;
DKDDQEWESPSPPKPTVFISGVIAR	DKDDQEWESPSPPKPT[79.9663]VFISGVIAR	K	G	41	65	25	3	16T(79.9663)	sp|P51397|DAP1_HUMAN	P51397	DAP1_HUMAN	DAP	Death-associated protein 1			6	2.63239456E8	MS/MS	STY:79.9663@DKDDQEWES(0.0362)PS(0.0362)PPKPT(0.9068)VFIS(0.0208)GVIAR;
DKDDQEWESPSPPKPTVFISGVIAR	DKDDQEWESPS[79.9663]PPKPTVFISGVIAR	K	G	41	65	25	3	11S(79.9663)	sp|P51397|DAP1_HUMAN	P51397	DAP1_HUMAN	DAP	Death-associated protein 1			2	2.02678944E8	MS/MS	STY:79.9663@DKDDQEWES(0.0208)PS(0.9160)PPKPT(0.0365)VFIS(0.0267)GVIAR;
DKDDQEWESPSPPKPTVFISGVIAR	DKDDQEWES[79.9663]PSPPKPTVFISGVIAR	K	G	41	65	25	3	9S(79.9663)	sp|P51397|DAP1_HUMAN	P51397	DAP1_HUMAN	DAP	Death-associated protein 1			5	6.0630496E7	MS/MS	STY:79.9663@DKDDQEWES(0.8407)PS(0.0389)PPKPT(0.0873)VFIS(0.0331)GVIAR;
DKDDQEWESPSPPKPTVFISGVIAR	DKDDQEWES[79.9663]PS[79.9663]PPKPTVFISGVIAR	K	G	41	65	25	3	11S(79.9663),9S(79.9663)	sp|P51397|DAP1_HUMAN	P51397	DAP1_HUMAN	DAP	Death-associated protein 1			2	1.0686572E7	MS/MS	STY:79.9663@DKDDQEWES(0.9385)PS(0.9385)PPKPT(0.0616)VFIS(0.0614)GVIAR;
DKEVSDDEAEEK	DKEVS[79.9663]DDEAEEK	R	E	349	360	12	2	5S(79.9663)	sp|P07900-2|HS90A_HUMAN	P07900-2	HS90A_HUMAN	HSP90AA1	Isoform 2 of Heat shock protein HSP 90-alpha		sp|P07900|HS90A_HUMAN	1	1.2852391E7	MS/MS	STY:79.9663@DKEVS(1.0000)DDEAEEK;
DKSPVREPIDNLTPEER	DKSPVREPIDNLT[79.9663]PEER	K	D	134	150	17	3	13T(79.9663)	sp|Q14498-2|RBM39_HUMAN	Q14498-2	RBM39_HUMAN	RBM39	Isoform 2 of RNA-binding protein 39		sp|Q14498-3|RBM39_HUMAN, sp|Q14498|RBM39_HUMAN	2	5.5960464E7	MS/MS	STY:79.9663@DKS(0.1320)PVREPIDNLT(0.8680)PEER;
DKSPVREPIDNLTPEER	DKS[79.9663]PVREPIDNLTPEER	K	D	134	150	17	3	3S(79.9663)	sp|Q14498-2|RBM39_HUMAN	Q14498-2	RBM39_HUMAN	RBM39	Isoform 2 of RNA-binding protein 39		sp|Q14498-3|RBM39_HUMAN, sp|Q14498|RBM39_HUMAN	4	5.5960464E7	MS/MS	STY:79.9663@DKS(0.9410)PVREPIDNLT(0.0590)PEER;
DLDEEGSEK	DLDEEGS[79.9663]EK	K	E	573	581	9	2	7S(79.9663)	sp|O43719|HTSF1_HUMAN	O43719	HTSF1_HUMAN	HTATSF1	HIV Tat-specific factor 1			3	5.93938e+06	MS/MS	STY:79.9663@DLDEEGS(1.0000)EK;
DLFDLNSSEEDDTEGFSER	DLFDLNS[79.9663]S[79.9663]EEDDTEGFSER	K	G	666	684	19	2	7S(79.9663),8S(79.9663)	sp|Q9Y3T9|NOC2L_HUMAN	Q9Y3T9	NOC2L_HUMAN	NOC2L	Nucleolar complex protein 2 homolog			2	1656066	MS/MS	STY:79.9663@DLFDLNS(0.8761)S(0.8761)EEDDT(0.1239)EGFS(0.1239)ER;
DLFDYSPPLHK	DLFDYS[79.9663]PPLHK	K	N	505	515	11	2	6S(79.9663)	sp|Q9NYF8-2|BCLF1_HUMAN	Q9NYF8-2	BCLF1_HUMAN	BCLAF1	Isoform 2 of Bcl-2-associated transcription factor 1		sp|Q9NYF8-3|BCLF1_HUMAN, sp|Q9NYF8|BCLF1_HUMAN	1	4.0908264E7	MS/MS	STY:79.9663@DLFDY(0.0732)S(0.9268)PPLHK;
DLFDYSPPLHK	DLFDY[79.9663]SPPLHK	K	N	505	515	11	2	5Y(79.9663)	sp|Q9NYF8-2|BCLF1_HUMAN	Q9NYF8-2	BCLF1_HUMAN	BCLAF1	Isoform 2 of Bcl-2-associated transcription factor 1		sp|Q9NYF8-3|BCLF1_HUMAN, sp|Q9NYF8|BCLF1_HUMAN	7	4.0908264E7	MS/MS	STY:79.9663@DLFDY(0.5000)S(0.5000)PPLHK;
DLGHPVEEEDELESGDQEDEDDESEDPGK	DLGHPVEEEDELESGDQEDEDDES[79.9663]EDPGK	K	D	940	968	29	3	24S(79.9663)	sp|O60763-2|USO1_HUMAN	O60763-2	USO1_HUMAN	USO1	Isoform 2 of General vesicular transport factor p115		sp|O60763|USO1_HUMAN	1	1.1118871E7	MS/MS	STY:79.9663@DLGHPVEEEDELES(0.4272)GDQEDEDDES(0.5728)EDPGK;
DLGHPVEEEDELESGDQEDEDDESEDPGK	DLGHPVEEEDELES[79.9663]GDQEDEDDESEDPGK	K	D	940	968	29	3	14S(79.9663)	sp|O60763-2|USO1_HUMAN	O60763-2	USO1_HUMAN	USO1	Isoform 2 of General vesicular transport factor p115		sp|O60763|USO1_HUMAN	1	1.1118871E7	MS/MS	STY:79.9663@DLGHPVEEEDELES(0.5000)GDQEDEDDES(0.5000)EDPGK;
DLGSTEDGDGTDDFLTDKEDEK	DLGS[79.9663]TEDGDGTDDFLTDKEDEK	K	A	180	201	22	3	4S(79.9663)	sp|Q15527|SURF2_HUMAN	Q15527	SURF2_HUMAN	SURF2	Surfeit locus protein 2			2	3.63865e+06	MS/MS	STY:79.9663@DLGS(0.4390)T(0.4390)EDGDGT(0.0822)DDFLT(0.0399)DKEDEK;
DLGSTEDGDGTDDFLTDKEDEK	DLGS[79.9663]T[79.9663]EDGDGTDDFLTDKEDEK	K	A	180	201	22	3	4S(79.9663),5T(79.9663)	sp|Q15527|SURF2_HUMAN	Q15527	SURF2_HUMAN	SURF2	Surfeit locus protein 2			1	1.86996e+06	MS/MS	STY:79.9663@DLGS(0.5000)T(0.5000)EDGDGT(0.5000)DDFLT(0.5000)DKEDEK;
DLISLDSSPAK	DLISLDS[79.9663]SPAK	K	E	379	389	11	2	7S(79.9663)	sp|Q9UN79|SOX13_HUMAN	Q9UN79	SOX13_HUMAN	SOX13	Transcription factor SOX-13			1	0	MS/MS	STY:79.9663@DLIS(0.0438)LDS(0.4781)S(0.4781)PAK;
DLLHPSPEEEK	DLLHPS[79.9663]PEEEK	K	R	6	16	11	2	6S(79.9663)	sp|P42677|RS27_HUMAN	P42677	RS27_HUMAN	RPS27	Small ribosomal subunit protein eS27			1	0	MS/MS	STY:79.9663@DLLHPS(1.0000)PEEEK;
DLNESPVK	DLNES[79.9663]PVK	R	S	507	514	8	2	5S(79.9663)	sp|Q96RL1-2|UIMC1_HUMAN	Q96RL1-2	UIMC1_HUMAN	UIMC1	Isoform 2 of BRCA1-A complex subunit RAP80		sp|Q96RL1-3|UIMC1_HUMAN, sp|Q96RL1-4|UIMC1_HUMAN, sp|Q96RL1|UIMC1_HUMAN	1	0	MS/MS	STY:79.9663@DLNES(1.0000)PVK;
DLPAQRGEESSEEEEK	DLPAQRGEES[79.9663]S[79.9663]EEEEK	R	G	150	165	16	2	10S(79.9663),11S(79.9663)	sp|Q9BW71|HIRP3_HUMAN	Q9BW71	HIRP3_HUMAN	HIRIP3	HIRA-interacting protein 3			1	9684852	MS/MS	STY:79.9663@DLPAQRGEES(1.0000)S(1.0000)EEEEK;
DLVQPDKPASPK	DLVQPDKPAS[79.9663]PK	R	F	506	517	12	2	10S(79.9663)	sp|Q6PJT7-2|ZC3HE_HUMAN	Q6PJT7-2	ZC3HE_HUMAN	ZC3H14	Isoform 2 of Zinc finger CCCH domain-containing protein 14		sp|Q6PJT7-5|ZC3HE_HUMAN, sp|Q6PJT7-9|ZC3HE_HUMAN, sp|Q6PJT7|ZC3HE_HUMAN	1	3.22839e+06	MS/MS	STY:79.9663@DLVQPDKPAS(1.0000)PK;
DNTFFRESPVGR	DNTFFRES[79.9663]PVGR	R	K	133	144	12	2	8S(79.9663)	sp|Q8NEY8-2|PPHLN_HUMAN	Q8NEY8-2	PPHLN_HUMAN	PPHLN1	Isoform 2 of Periphilin-1		sp|Q8NEY8-3|PPHLN_HUMAN, sp|Q8NEY8-5|PPHLN_HUMAN, sp|Q8NEY8-6|PPHLN_HUMAN, sp|Q8NEY8-8|PPHLN_HUMAN, sp|Q8NEY8-9|PPHLN_HUMAN, sp|Q8NEY8|PPHLN_HUMAN	1	4202468	MS/MS	STY:79.9663@DNT(0.1171)FFRES(0.8829)PVGR;
DPAQPMSPGEATQSGAR	DPAQPMS[79.9663]PGEATQSGAR	R	P	5	21	17	2	7S(79.9663)	sp|Q9BQG0-2|MBB1A_HUMAN	Q9BQG0-2	MBB1A_HUMAN	MYBBP1A	Isoform 2 of Myb-binding protein 1A		sp|Q9BQG0|MBB1A_HUMAN	1	0	MS/MS	STY:79.9663@DPAQPMS(0.3333)PGEAT(0.3333)QS(0.3333)GAR;
DQGGYTMHQDQEGDTDAGLKESPLQTPTEDGSEEPGSETSDAK	DQGGYTM[15.9949]HQDQEGDTDAGLKESPLQTPTEDGSEEPGS[79.9663]ET[79.9663]SDAK	K	S	25	67	43	5	37S(79.9663),39T(79.9663),7M(15.9949)	sp|P10636|TAU_HUMAN	P10636	TAU_HUMAN	MAPT	Microtubule-associated protein tau			1	0	MS/MS	STY:79.9663@DQGGY(0.1909)T(0.1909)MHQDQEGDT(0.1909)DAGLKES(0.1909)PLQT(0.1909)PT(0.1909)EDGS(0.1909)EEPGS(0.2213)ET(0.2213)S(0.2213)DAK;M:15.9949@DQGGYTM(1.0000)HQDQEGDTDAGLKESPLQTPTEDGSEEPGSETSDAK;
DQGGYTMHQDQEGDTDAGLKESPLQTPTEDGSEEPGSETSDAK	DQGGYTM[15.9949]HQDQEGDTDAGLKESPLQTPTEDGS[79.9663]EEPGSETSDAK	K	S	25	67	43	6	32S(79.9663),7M(15.9949)	sp|P10636|TAU_HUMAN	P10636	TAU_HUMAN	MAPT	Microtubule-associated protein tau			1	0	MS/MS	STY:79.9663@DQGGY(0.0514)T(0.0514)MHQDQEGDT(0.0514)DAGLKES(0.0514)PLQT(0.0514)PT(0.0514)EDGS(0.1729)EEPGS(0.1729)ET(0.1729)S(0.1729)DAK;M:15.9949@DQGGYTM(1.0000)HQDQEGDTDAGLKESPLQTPTEDGSEEPGSETSDAK;
DQNESLDEEMFYK	DQNES[79.9663]LDEEMFYK	K	L	669	681	13	2	5S(79.9663)	sp|Q96AC1-3|FERM2_HUMAN	Q96AC1-3	FERM2_HUMAN	FERMT2	Isoform 3 of Fermitin family homolog 2		sp|Q96AC1|FERM2_HUMAN	1	0	MS/MS	STY:79.9663@DQNES(0.8288)LDEEMFY(0.1712)K;
DQQPSGSEGEDDDAEAALK	DQQPS[79.9663]GS[79.9663]EGEDDDAEAALK	K	K	82	100	19	2	5S(79.9663),7S(79.9663)	sp|Q9NXG2|THUM1_HUMAN	Q9NXG2	THUM1_HUMAN	THUMPD1	THUMP domain-containing protein 1			3	1.2227094E7	MS/MS	STY:79.9663@DQQPS(1.0000)GS(1.0000)EGEDDDAEAALK;
DQQPSGSEGEDDDAEAALKK	DQQPS[79.9663]GS[79.9663]EGEDDDAEAALKK	K	E	82	101	20	2,3	5S(79.9663),7S(79.9663)	sp|Q9NXG2|THUM1_HUMAN	Q9NXG2	THUM1_HUMAN	THUMPD1	THUMP domain-containing protein 1			7	1.4474716E7	MS/MS	STY:79.9663@DQQPS(1.0000)GS(1.0000)EGEDDDAEAALKK;
DQSPPPSPPPSYHPPPPPTK	DQSPPPSPPPS[79.9663]Y[79.9663]HPPPPPTK	K	K	726	745	20	3	11S(79.9663),12Y(79.9663)	sp|Q9P206-2|K1522_HUMAN	Q9P206-2	K1522_HUMAN	KIAA1522	Isoform 2 of Uncharacterized protein KIAA1522		sp|Q9P206-3|K1522_HUMAN, sp|Q9P206|K1522_HUMAN	1	0	MS/MS	STY:79.9663@DQS(0.1374)PPPS(0.1374)PPPS(0.5751)Y(0.5751)HPPPPPT(0.5751)K;
DQSPPPSPPPSYHPPPPPTK	DQSPPPS[79.9663]PPPS[79.9663]YHPPPPPTK	K	K	726	745	20	3	11S(79.9663),7S(79.9663)	sp|Q9P206-2|K1522_HUMAN	Q9P206-2	K1522_HUMAN	KIAA1522	Isoform 2 of Uncharacterized protein KIAA1522		sp|Q9P206-3|K1522_HUMAN, sp|Q9P206|K1522_HUMAN	1	0	MS/MS	STY:79.9663@DQS(0.0922)PPPS(0.5590)PPPS(0.5590)Y(0.5590)HPPPPPT(0.2310)K;
DRASPAAAEEVVPEWASCLK	DRAS[79.9663]PAAAEEVVPEWASC[57.0215]LK	R	S	438	457	20	3	18C(57.0215),4S(79.9663)	sp|Q8N3V7-2|SYNPO_HUMAN	Q8N3V7-2	SYNPO_HUMAN	SYNPO	Isoform 2 of Synaptopodin		sp|Q8N3V7-3|SYNPO_HUMAN, sp|Q8N3V7|SYNPO_HUMAN	1	0	MS/MS	STY:79.9663@DRAS(0.7948)PAAAEEVVPEWAS(0.2052)CLK;
DRPVGGSPGGPR	DRPVGGS[79.9663]PGGPR	R	L	129	140	12	2	7S(79.9663)	sp|Q8NHG8|ZNRF2_HUMAN	Q8NHG8	ZNRF2_HUMAN	ZNRF2	E3 ubiquitin-protein ligase ZNRF2			1	0	MS/MS	STY:79.9663@DRPVGGS(1.0000)PGGPR;
DRSSPPPGYIPDELHQVAR	DRSSPPPGY[79.9663]IPDELHQVAR	R	N	161	179	19	3	9Y(79.9663)	sp|Q9Y2U5|M3K2_HUMAN	Q9Y2U5	M3K2_HUMAN	MAP3K2	Mitogen-activated protein kinase kinase kinase 2			1	2.76054e+06	MS/MS	STY:79.9663@DRS(0.0528)S(0.0528)PPPGY(0.8945)IPDELHQVAR;
DRSSPPPGYIPDELHQVAR	DRS[79.9663]SPPPGYIPDELHQVAR	R	N	161	179	19	3	3S(79.9663)	sp|Q9Y2U5|M3K2_HUMAN	Q9Y2U5	M3K2_HUMAN	MAP3K2	Mitogen-activated protein kinase kinase kinase 2			2	2.76054e+06	MS/MS	STY:79.9663@DRS(0.3745)S(0.3745)PPPGY(0.2509)IPDELHQVAR;
DSAPELNVSSSETEEDKEEAKPDGEK	DSAPELNVS[79.9663]S[79.9663]SETEEDKEEAKPDGEK	K	D	878	903	26	3	10S(79.9663),9S(79.9663)	sp|Q86UV5-2|UBP48_HUMAN	Q86UV5-2	UBP48_HUMAN	USP48	Isoform 2 of Ubiquitin carboxyl-terminal hydrolase 48		sp|Q86UV5-5|UBP48_HUMAN, sp|Q86UV5-6|UBP48_HUMAN, sp|Q86UV5-8|UBP48_HUMAN, sp|Q86UV5|UBP48_HUMAN	1	2573773	MS/MS	STY:79.9663@DS(0.3858)APELNVS(0.4035)S(0.4035)S(0.4035)ET(0.4035)EEDKEEAKPDGEK;
DSDQVAQSDGEESPAAEEQLLGEHIK	DSDQVAQSDGEES[79.9663]PAAEEQLLGEHIK	K	E	520	545	26	3	13S(79.9663)	sp|O94979-2|SC31A_HUMAN	O94979-2	SC31A_HUMAN	SEC31A	Isoform 2 of Protein transport protein Sec31A		sp|O94979-3|SC31A_HUMAN, sp|O94979-8|SC31A_HUMAN, sp|O94979-9|SC31A_HUMAN, sp|O94979|SC31A_HUMAN	1	5.75856e+06	MS/MS	STY:79.9663@DS(0.1998)DQVAQS(0.0359)DGEES(0.7643)PAAEEQLLGEHIK;
DSDQVAQSDGEESPAAEEQLLGEHIK	DSDQVAQS[79.9663]DGEESPAAEEQLLGEHIK	K	E	520	545	26	3	8S(79.9663)	sp|O94979-2|SC31A_HUMAN	O94979-2	SC31A_HUMAN	SEC31A	Isoform 2 of Protein transport protein Sec31A		sp|O94979-3|SC31A_HUMAN, sp|O94979-8|SC31A_HUMAN, sp|O94979-9|SC31A_HUMAN, sp|O94979|SC31A_HUMAN	1	5912433	MS/MS	STY:79.9663@DS(0.0642)DQVAQS(0.4679)DGEES(0.4679)PAAEEQLLGEHIK;
DSQDASAEQSDHDDEVASLASASGGFGTK	DSQDASAEQSDHDDEVASLASASGGFGT[79.9663]K	R	V	489	517	29	3	28T(79.9663)	sp|Q6P2E9-2|EDC4_HUMAN	Q6P2E9-2	EDC4_HUMAN	EDC4	Isoform 2 of Enhancer of mRNA-decapping protein 4		sp|Q6P2E9|EDC4_HUMAN	1	0	MS/MS	STY:79.9663@DS(0.0323)QDAS(0.0524)AEQS(0.0524)DHDDEVAS(0.0249)LAS(0.0348)AS(0.0348)GGFGT(0.7684)K;
DSSFTEVPRSPK	DSSFT[79.9663]EVPRSPK	R	H	236	247	12	2	5T(79.9663)	sp|O95425-3|SVIL_HUMAN	O95425-3	SVIL_HUMAN	SVIL	Isoform SV3 of Supervillin		sp|O95425-2|SVIL_HUMAN, sp|O95425-4|SVIL_HUMAN, sp|O95425|SVIL_HUMAN	1	0	MS/MS	STY:79.9663@DS(0.0206)S(0.0206)FT(0.4794)EVPRS(0.4794)PK;
DSSKGEDSAEETEAK	DSSKGEDS[79.9663]AEETEAK	R	P	475	489	15	2	8S(79.9663)	sp|Q12906-2|ILF3_HUMAN	Q12906-2	ILF3_HUMAN	ILF3	Isoform 2 of Interleukin enhancer-binding factor 3		sp|Q12906-3|ILF3_HUMAN, sp|Q12906-4|ILF3_HUMAN, sp|Q12906-5|ILF3_HUMAN, sp|Q12906-6|ILF3_HUMAN, sp|Q12906-7|ILF3_HUMAN, sp|Q12906|ILF3_HUMAN	1	3.44316e+06	MS/MS	STY:79.9663@DS(0.0471)S(0.0471)KGEDS(0.4529)AEET(0.4529)EAK;
DSDQVAQSDGEESPAAEEQLLGEHIK	DS[79.9663]DQVAQSDGEESPAAEEQLLGEHIK	K	E	520	545	26	3	2S(79.9663)	sp|O94979-2|SC31A_HUMAN	O94979-2	SC31A_HUMAN	SEC31A	Isoform 2 of Protein transport protein Sec31A		sp|O94979-3|SC31A_HUMAN, sp|O94979-8|SC31A_HUMAN, sp|O94979-9|SC31A_HUMAN, sp|O94979|SC31A_HUMAN	2	5912433	MS/MS	STY:79.9663@DS(0.8531)DQVAQS(0.0734)DGEES(0.0734)PAAEEQLLGEHIK;
DSENLASPSEYPENGER	DS[79.9663]ENLASPSEYPENGER	R	F	600	616	17	2	2S(79.9663)	sp|P52948-2|NUP98_HUMAN	P52948-2	NUP98_HUMAN	NUP98	Isoform 2 of Nuclear pore complex protein Nup98-Nup96		sp|P52948-3|NUP98_HUMAN, sp|P52948-4|NUP98_HUMAN, sp|P52948-5|NUP98_HUMAN, sp|P52948-6|NUP98_HUMAN, sp|P52948|NUP98_HUMAN	1	5.2156748E7	MS/MS	STY:79.9663@DS(0.2500)ENLAS(0.2500)PS(0.2500)EY(0.2500)PENGER;
DSGSQVEEDTSCSDSK	DS[79.9663]GSQVEEDTSC[57.0215]SDSK	K	T	621	636	16	2	12C(57.0215),2S(79.9663)	sp|Q08499-10|PDE4D_HUMAN	Q08499-10	PDE4D_HUMAN	PDE4D	Isoform 9 of cAMP-specific 3',5'-cyclic phosphodiesterase 4D		sp|Q08499-11|PDE4D_HUMAN, sp|Q08499-2|PDE4D_HUMAN, sp|Q08499-3|PDE4D_HUMAN, sp|Q08499-4|PDE4D_HUMAN, sp|Q08499-5|PDE4D_HUMAN, sp|Q08499-6|PDE4D_HUMAN, sp|Q08499-8|PDE4D_HUMAN, sp|Q08499-9|PDE4D_HUMAN, sp|Q08499|PDE4D_HUMAN	1	2387067	MS/MS	STY:79.9663@DS(0.4789)GS(0.4789)QVEEDT(0.0110)S(0.0110)CS(0.0101)DS(0.0101)K;
DSHSSEEDEASSQTDLSQTISK	DS[79.9663]HS[79.9663]SEEDEASSQTDLSQTISK	R	K	153	174	22	3	2S(79.9663),4S(79.9663)	sp|Q5JTV8-2|TOIP1_HUMAN	Q5JTV8-2	TOIP1_HUMAN	TOR1AIP1	Isoform 2 of Torsin-1A-interacting protein 1		sp|Q5JTV8-3|TOIP1_HUMAN, sp|Q5JTV8-4|TOIP1_HUMAN, sp|Q5JTV8|TOIP1_HUMAN	1	1.57264e+06	MS/MS	STY:79.9663@DS(0.6172)HS(0.6172)S(0.6172)EEDEAS(0.0285)S(0.0285)QT(0.0285)DLS(0.0210)QT(0.0210)IS(0.0210)K;
DSQDASAEQSDHDDEVASLASASGGFGTK	DS[79.9663]QDASAEQSDHDDEVASLASASGGFGTK	R	V	489	517	29	3	2S(79.9663)	sp|Q6P2E9-2|EDC4_HUMAN	Q6P2E9-2	EDC4_HUMAN	EDC4	Isoform 2 of Enhancer of mRNA-decapping protein 4		sp|Q6P2E9|EDC4_HUMAN	1	0	MS/MS	STY:79.9663@DS(0.8742)QDAS(0.0153)AEQS(0.0153)DHDDEVAS(0.0269)LAS(0.0239)AS(0.0196)GGFGT(0.0248)K;
DSSKGEDSAEETEAKPAVVAPAPVVEAVSTPSAAFPSDATAEQGPILTK	DS[79.9663]SKGEDSAEETEAKPAVVAPAPVVEAVSTPSAAFPSDATAEQGPILTK	R	H	475	523	49	4	2S(79.9663)	sp|Q12906-2|ILF3_HUMAN	Q12906-2	ILF3_HUMAN	ILF3	Isoform 2 of Interleukin enhancer-binding factor 3		sp|Q12906-3|ILF3_HUMAN, sp|Q12906-5|ILF3_HUMAN, sp|Q12906|ILF3_HUMAN	1	0	MS/MS	STY:79.9663@DS(0.2259)S(0.2259)KGEDS(0.2259)AEET(0.2259)EAKPAVVAPAPVVEAVS(0.0183)T(0.0183)PS(0.0183)AAFPS(0.0108)DAT(0.0154)AEQGPILT(0.0154)K;
DTHEDHDTSTENTDESNHDPQFEPIVSLPEQEIK	DTHEDHDTSTENT[79.9663]DESNHDPQFEPIVSLPEQEIK	K	T	6	39	34	3,4	13T(79.9663)	sp|P43487-2|RANG_HUMAN	P43487-2	RANG_HUMAN	RANBP1	Isoform 2 of Ran-specific GTPase-activating protein		sp|P43487|RANG_HUMAN	2	1.4194911E7	MS/MS	STY:79.9663@DT(0.0414)HEDHDT(0.0525)S(0.0525)T(0.0396)ENT(0.7869)DES(0.0153)NHDPQFEPIVS(0.0119)LPEQEIK;
DTSENADGQSDENKDDYTIPDEYR	DTSENADGQSDENKDDYTIPDEY[79.9663]R	K	I	757	780	24	3	23Y(79.9663)	sp|P43243|MATR3_HUMAN	P43243	MATR3_HUMAN	MATR3	Matrin-3		sp|P43243-2|MATR3_HUMAN	2	3.2238048E7	MS/MS	STY:79.9663@DT(0.0447)S(0.0447)ENADGQS(0.0447)DENKDDY(0.0738)T(0.0738)IPDEY(0.7185)R;
DTSENADGQSDENKDDYTIPDEYR	DTSENADGQSDENKDDY[79.9663]TIPDEYR	K	I	757	780	24	3	17Y(79.9663)	sp|P43243|MATR3_HUMAN	P43243	MATR3_HUMAN	MATR3	Matrin-3		sp|P43243-2|MATR3_HUMAN	1	2.231284E7	MS/MS	STY:79.9663@DT(0.0179)S(0.0179)ENADGQS(0.0334)DENKDDY(0.8965)T(0.0172)IPDEY(0.0172)R;
DTSENADGQSDENKDDYTIPDEYR	DTSENADGQS[79.9663]DENKDDYTIPDEYR	K	I	757	780	24	3	10S(79.9663)	sp|P43243|MATR3_HUMAN	P43243	MATR3_HUMAN	MATR3	Matrin-3		sp|P43243-2|MATR3_HUMAN	2	9925207	MS/MS	STY:79.9663@DT(0.0616)S(0.0616)ENADGQS(0.8029)DENKDDY(0.0274)T(0.0274)IPDEY(0.0192)R;
DTYSDRSGSSSPDSEITELK	DTYSDRSGSSSPDS[79.9663]EIT[79.9663]ELK	R	F	334	353	20	3	14S(79.9663),17T(79.9663)	sp|P17812-2|PYRG1_HUMAN	P17812-2	PYRG1_HUMAN	CTPS1	Isoform 2 of CTP synthase 1		sp|P17812|PYRG1_HUMAN	1	3.24147e+06	MS/MS	STY:79.9663@DT(0.1904)Y(0.1904)S(0.1904)DRS(0.1904)GS(0.1904)S(0.1904)S(0.1904)PDS(0.3336)EIT(0.3336)ELK;
DTYSDRSGSSSPDSEITELK	DTYSDRSGS[79.9663]S[79.9663]SPDSEITELK	R	F	334	353	20	2	10S(79.9663),9S(79.9663)	sp|P17812-2|PYRG1_HUMAN	P17812-2	PYRG1_HUMAN	CTPS1	Isoform 2 of CTP synthase 1		sp|P17812|PYRG1_HUMAN	1	0	MS/MS	STY:79.9663@DT(0.2172)Y(0.2172)S(0.2172)DRS(0.2172)GS(0.2262)S(0.2262)S(0.2262)PDS(0.2262)EIT(0.2262)ELK;
DTHEDHDTSTENTDESNHDPQFEPIVSLPEQEIK	DT[79.9663]HEDHDTSTENTDESNHDPQFEPIVSLPEQEIK	K	T	6	39	34	4	2T(79.9663)	sp|P43487-2|RANG_HUMAN	P43487-2	RANG_HUMAN	RANBP1	Isoform 2 of Ran-specific GTPase-activating protein		sp|P43487|RANG_HUMAN	1	0	MS/MS	STY:79.9663@DT(0.1661)HEDHDT(0.1661)S(0.1661)T(0.1661)ENT(0.1661)DES(0.1661)NHDPQFEPIVS(0.0037)LPEQEIK;
DTHEDHDTSTENTDESNHDPQFEPIVSLPEQEIK	DT[79.9663]HEDHDT[79.9663]STENTDESNHDPQFEPIVSLPEQEIK	K	T	6	39	34	3	2T(79.9663),8T(79.9663)	sp|P43487-2|RANG_HUMAN	P43487-2	RANG_HUMAN	RANBP1	Isoform 2 of Ran-specific GTPase-activating protein		sp|P43487|RANG_HUMAN	1	0	MS/MS	STY:79.9663@DT(0.6161)HEDHDT(0.6161)S(0.6161)T(0.0380)ENT(0.0380)DES(0.0380)NHDPQFEPIVS(0.0380)LPEQEIK;
DTSENADGQSDENKDDYTIPDEYR	DT[79.9663]SENADGQSDENKDDYTIPDEYR	K	I	757	780	24	3	2T(79.9663)	sp|P43243|MATR3_HUMAN	P43243	MATR3_HUMAN	MATR3	Matrin-3		sp|P43243-2|MATR3_HUMAN	3	3.2238048E7	MS/MS	STY:79.9663@DT(0.4468)S(0.4468)ENADGQS(0.0172)DENKDDY(0.0345)T(0.0345)IPDEY(0.0202)R;
DTYSDRSGSSSPDSEITELK	DT[79.9663]YSDRSGSSSPDS[79.9663]EITELK	R	F	334	353	20	3	14S(79.9663),2T(79.9663)	sp|P17812-2|PYRG1_HUMAN	P17812-2	PYRG1_HUMAN	CTPS1	Isoform 2 of CTP synthase 1		sp|P17812|PYRG1_HUMAN	1	3.28576e+06	MS/MS	STY:79.9663@DT(0.2331)Y(0.2331)S(0.2331)DRS(0.2331)GS(0.2331)S(0.2331)S(0.2331)PDS(0.2869)EIT(0.0815)ELK;
DVMSDETNNEETESPSQEFVNITK	DVMSDETNNEET[79.9663]ESPSQEFVNITK	R	Y	1141	1164	24	3	12T(79.9663)	sp|P46821|MAP1B_HUMAN	P46821	MAP1B_HUMAN	MAP1B	Microtubule-associated protein 1B			1	0	MS/MS	STY:79.9663@DVMS(0.0143)DET(0.0180)NNEET(0.4493)ES(0.4493)PS(0.0130)QEFVNIT(0.0562)K;
DVTPPPETEVVLIK	DVTPPPET[79.9663]EVVLIK	K	N	519	532	14	2	8T(79.9663)	sp|P27816-6|MAP4_HUMAN	P27816-6	MAP4_HUMAN	MAP4	Isoform 6 of Microtubule-associated protein 4		sp|P27816-2|MAP4_HUMAN, sp|P27816|MAP4_HUMAN	2	2.65783E7	MS/MS	STY:79.9663@DVT(0.0796)PPPET(0.9204)EVVLIK;
DVTPPPETEVVLIK	DVT[79.9663]PPPETEVVLIK	K	N	519	532	14	2	3T(79.9663)	sp|P27816-6|MAP4_HUMAN	P27816-6	MAP4_HUMAN	MAP4	Isoform 6 of Microtubule-associated protein 4		sp|P27816-2|MAP4_HUMAN, sp|P27816|MAP4_HUMAN	2	2.6447092E7	MS/MS	STY:79.9663@DVT(0.9408)PPPET(0.0592)EVVLIK;
DVYLSPRDDGYSTK	DVYLS[79.9663]PRDDGYSTK	R	D	191	204	14	2	5S(79.9663)	sp|P38159-2|RBMX_HUMAN	P38159-2	RBMX_HUMAN	RBMX	Isoform 2 of RNA-binding motif protein, X chromosome	RBMXL1	sp|P38159|RBMX_HUMAN, sp|Q96E39|RMXL1_HUMAN	2	2.7381282E7	MS/MS	STY:79.9663@DVY(0.0493)LS(0.8884)PRDDGY(0.0208)S(0.0208)T(0.0208)K;
DVYLSPR	DVY[79.9663]LSPR	R	D	191	197	7	2	3Y(79.9663)	sp|P38159-2|RBMX_HUMAN	P38159-2	RBMX_HUMAN	RBMX	Isoform 2 of RNA-binding motif protein, X chromosome	RBMXL1	sp|P38159|RBMX_HUMAN, sp|Q96E39|RMXL1_HUMAN	1	1.85499e+06	MS/MS	STY:79.9663@DVY(0.5000)LS(0.5000)PR;
DVYLSPRDDGYSTK	DVY[79.9663]LSPRDDGYSTK	R	D	191	204	14	2	3Y(79.9663)	sp|P38159-2|RBMX_HUMAN	P38159-2	RBMX_HUMAN	RBMX	Isoform 2 of RNA-binding motif protein, X chromosome	RBMXL1	sp|P38159|RBMX_HUMAN, sp|Q96E39|RMXL1_HUMAN	5	4.3539208E7	MS/MS	STY:79.9663@DVY(0.4647)LS(0.4647)PRDDGY(0.0478)S(0.0115)T(0.0115)K;
DWEDDSDEDMSNFDR	DWEDDSDEDMS[79.9663]NFDR	K	F	108	122	15	2	11S(79.9663)	sp|Q15185|TEBP_HUMAN	Q15185	TEBP_HUMAN	PTGES3	Prostaglandin E synthase 3		sp|Q15185-2|TEBP_HUMAN, sp|Q15185-4|TEBP_HUMAN	2	2.1097152E8	MS/MS	STY:79.9663@DWEDDS(0.0699)DEDMS(0.9301)NFDR;
DWEDDSDEDMSNFDR	DWEDDS[79.9663]DEDMSNFDR	K	F	108	122	15	2	6S(79.9663)	sp|Q15185|TEBP_HUMAN	Q15185	TEBP_HUMAN	PTGES3	Prostaglandin E synthase 3		sp|Q15185-2|TEBP_HUMAN, sp|Q15185-4|TEBP_HUMAN	10	2.1097152E8	MS/MS	STY:79.9663@DWEDDS(0.9385)DEDMS(0.0615)NFDR;
DWEDDSDEDMSNFDR	DWEDDS[79.9663]DEDM[15.9949]SNFDR	K	F	108	122	15	2	10M(15.9949),6S(79.9663)	sp|Q15185|TEBP_HUMAN	Q15185	TEBP_HUMAN	PTGES3	Prostaglandin E synthase 3		sp|Q15185-2|TEBP_HUMAN, sp|Q15185-4|TEBP_HUMAN	5	2.288195E7	MS/MS	STY:79.9663@DWEDDS(0.9412)DEDMS(0.0588)NFDR;M:15.9949@DWEDDSDEDM(1.0000)SNFDR;
DYDEEEQGYDSEK	DYDEEEQGYDS[79.9663]EK	R	E	423	435	13	2	11S(79.9663)	sp|Q05519-2|SRS11_HUMAN	Q05519-2	SRS11_HUMAN	SRSF11	Isoform 2 of Serine/arginine-rich splicing factor 11		sp|Q05519|SRS11_HUMAN	1	1.2998588E7	MS/MS	STY:79.9663@DY(0.0491)DEEEQGY(0.0320)DS(0.9189)EK;
DYDEEEQGYDSEK	DYDEEEQGY[79.9663]DSEK	R	E	423	435	13	2	9Y(79.9663)	sp|Q05519-2|SRS11_HUMAN	Q05519-2	SRS11_HUMAN	SRSF11	Isoform 2 of Serine/arginine-rich splicing factor 11		sp|Q05519|SRS11_HUMAN	1	1.2998588E7	MS/MS	STY:79.9663@DY(0.0190)DEEEQGY(0.4905)DS(0.4905)EK;
DYEEVGADSADGEDEGEEY	DYEEVGADSADGEDEGEEY[79.9663]	K	-	431	449	19	2	19Y(79.9663)	sp|Q9BQE3|TBA1C_HUMAN	Q9BQE3	TBA1C_HUMAN	TUBA1C	Tubulin alpha-1C chain			1	0	MS/MS	STY:79.9663@DY(0.0935)EEVGADS(0.4455)ADGEDEGEEY(0.4610);
DYLLSESEDEGDNDGERK	DYLLS[79.9663]ES[79.9663]EDEGDNDGERK	K	H	25	42	18	2	5S(79.9663),7S(79.9663)	sp|Q9BVJ6-3|UT14A_HUMAN	Q9BVJ6-3	UT14A_HUMAN	UTP14A	Isoform 3 of U3 small nucleolar RNA-associated protein 14 homolog A		sp|Q9BVJ6|UT14A_HUMAN	1	0	MS/MS	STY:79.9663@DY(0.3371)LLS(0.8314)ES(0.8314)EDEGDNDGERK;
DYDDMSPR	DY[79.9663]DDMSPR	R	R	279	286	8	2	2Y(79.9663)	sp|P61978-2|HNRPK_HUMAN	P61978-2	HNRPK_HUMAN	HNRNPK	Isoform 2 of Heterogeneous nuclear ribonucleoprotein K		sp|P61978-3|HNRPK_HUMAN, sp|P61978|HNRPK_HUMAN	5	2.4046492E7	MS/MS	STY:79.9663@DY(0.9054)DDMS(0.0946)PR;
DYDDMSPR	DY[79.9663]DDM[15.9949]SPR	R	R	279	286	8	2	2Y(79.9663),5M(15.9949)	sp|P61978-2|HNRPK_HUMAN	P61978-2	HNRPK_HUMAN	HNRNPK	Isoform 2 of Heterogeneous nuclear ribonucleoprotein K		sp|P61978-3|HNRPK_HUMAN, sp|P61978|HNRPK_HUMAN	1	1.43485e+06	MS/MS	STY:79.9663@DY(0.5000)DDMS(0.5000)PR;M:15.9949@DYDDM(1.0000)SPR;
DYEIESQNPLASPTNTLLGSAK	DY[79.9663]EIESQNPLASPTNTLLGSAK	K	E	618	639	22	3	2Y(79.9663)	sp|Q7Z417|NUFP2_HUMAN	Q7Z417	NUFP2_HUMAN	NUFIP2	FMR1-interacting protein NUFIP2			1	3.94223e+06	MS/MS	STY:79.9663@DY(0.3866)EIES(0.3866)QNPLAS(0.0567)PT(0.0567)NT(0.0567)LLGS(0.0567)AK;
DYLLSESEDEGDNDGERK	DY[79.9663]LLS[79.9663]ESEDEGDNDGERK	K	H	25	42	18	2	2Y(79.9663),5S(79.9663)	sp|Q9BVJ6-3|UT14A_HUMAN	Q9BVJ6-3	UT14A_HUMAN	UTP14A	Isoform 3 of U3 small nucleolar RNA-associated protein 14 homolog A		sp|Q9BVJ6|UT14A_HUMAN	2	0	MS/MS	STY:79.9663@DY(0.6667)LLS(0.6667)ES(0.6667)EDEGDNDGERK;
EAALPPVSPLK	EAALPPVS[79.9663]PLK	R	A	1184	1194	11	2	8S(79.9663)	sp|Q04637-3|IF4G1_HUMAN	Q04637-3	IF4G1_HUMAN	EIF4G1	Isoform B of Eukaryotic translation initiation factor 4 gamma 1		sp|Q04637-4|IF4G1_HUMAN, sp|Q04637-5|IF4G1_HUMAN, sp|Q04637-6|IF4G1_HUMAN, sp|Q04637-7|IF4G1_HUMAN, sp|Q04637-8|IF4G1_HUMAN, sp|Q04637-9|IF4G1_HUMAN, sp|Q04637|IF4G1_HUMAN	3	1.74633e+06	MS/MS	STY:79.9663@EAALPPVS(1.0000)PLK;
EADEEGGENGPADQGFQPQEEEEREDSDTEEQVPEALER	EADEEGGENGPADQGFQPQEEEEREDS[79.9663]DTEEQVPEALER	K	K	4989	5027	39	3	27S(79.9663)	sp|Q9NU22|MDN1_HUMAN	Q9NU22	MDN1_HUMAN	MDN1	Midasin			1	0	MS/MS	STY:79.9663@EADEEGGENGPADQGFQPQEEEEREDS(0.5000)DT(0.5000)EEQVPEALER;
EADIDSSDESDIEEDIDQPSAHK	EADIDS[79.9663]SDES[79.9663]DIEEDIDQPS[79.9663]AHK	K	T	414	436	23	3	10S(79.9663),20S(79.9663),6S(79.9663)	sp|Q9P2I0|CPSF2_HUMAN	Q9P2I0	CPSF2_HUMAN	CPSF2	Cleavage and polyadenylation specificity factor subunit 2			1	2.05957e+06	MS/MS	STY:79.9663@EADIDS(0.7413)S(0.7413)DES(0.7587)DIEEDIDQPS(0.7587)AHK;
EAEEESSGGEEEDEDENIEVVYSK	EAEEESSGGEEEDEDENIEVVY[79.9663]S[79.9663]K	K	A	384	407	24	3	22Y(79.9663),23S(79.9663)	sp|P55010|IF5_HUMAN	P55010	IF5_HUMAN	EIF5	Eukaryotic translation initiation factor 5			1	2.5173052E7	MS/MS	STY:79.9663@EAEEES(0.3650)S(0.3650)GGEEEDEDENIEVVY(0.6348)S(0.6352)K;
EAEEESSGGEEEDEDENIEVVYSK	EAEEES[79.9663]SGGEEEDEDENIEVVYSK	K	A	384	407	24	3	6S(79.9663)	sp|P55010|IF5_HUMAN	P55010	IF5_HUMAN	EIF5	Eukaryotic translation initiation factor 5			1	0	MS/MS	STY:79.9663@EAEEES(0.2500)S(0.2500)GGEEEDEDENIEVVY(0.2500)S(0.2500)K;
EAEEESSGGEEEDEDENIEVVYSK	EAEEES[79.9663]S[79.9663]GGEEEDEDENIEVVYSK	K	A	384	407	24	3	6S(79.9663),7S(79.9663)	sp|P55010|IF5_HUMAN	P55010	IF5_HUMAN	EIF5	Eukaryotic translation initiation factor 5			13	3.3308404E7	MS/MS	STY:79.9663@EAEEES(0.9016)S(0.9016)GGEEEDEDENIEVVY(0.0984)S(0.0984)K;
EAEEGEDDRDSANGEDDS	EAEEGEDDRDSANGEDDS[79.9663]	K	-	276	293	18	2	18S(79.9663)	sp|P07910-2|HNRPC_HUMAN	P07910-2	HNRPC_HUMAN	HNRNPC	Isoform C1 of Heterogeneous nuclear ribonucleoproteins C1/C2		sp|P07910-3|HNRPC_HUMAN, sp|P07910-4|HNRPC_HUMAN, sp|P07910|HNRPC_HUMAN	3	2.49355488E8	MS/MS	STY:79.9663@EAEEGEDDRDS(0.0837)ANGEDDS(0.9163);
EAEEGEDDRDSANGEDDS	EAEEGEDDRDS[79.9663]ANGEDDS	K	-	276	293	18	2	11S(79.9663)	sp|P07910-2|HNRPC_HUMAN	P07910-2	HNRPC_HUMAN	HNRNPC	Isoform C1 of Heterogeneous nuclear ribonucleoproteins C1/C2		sp|P07910-3|HNRPC_HUMAN, sp|P07910-4|HNRPC_HUMAN, sp|P07910|HNRPC_HUMAN	11	2.51502736E8	MS/MS	STY:79.9663@EAEEGEDDRDS(0.9394)ANGEDDS(0.0606);
EALNIIGDISTSTVSTPVPPPVDDTWLQSASSHSPTPQR	EALNIIGDISTSTVSTPVPPPVDDTWLQS[79.9663]ASSHSPTPQR	K	R	727	765	39	3	29S(79.9663)	sp|P50570-2|DYN2_HUMAN	P50570-2	DYN2_HUMAN	DNM2	Isoform 2 of Dynamin-2		sp|P50570-3|DYN2_HUMAN, sp|P50570-4|DYN2_HUMAN, sp|P50570-5|DYN2_HUMAN, sp|P50570|DYN2_HUMAN	1	0	MS/MS	STY:79.9663@EALNIIGDIS(0.0068)T(0.0068)S(0.0068)T(0.0068)VS(0.0044)T(0.0044)PVPPPVDDT(0.0063)WLQS(0.1916)AS(0.1916)S(0.1916)HS(0.1916)PT(0.1916)PQR;
EAPAEGEAAEPGSPTAAEGEAASAASSTSSPK	EAPAEGEAAEPGSPTAAEGEAASAAS[79.9663]STSSPK	K	A	106	137	32	3	26S(79.9663)	sp|P29966|MARCS_HUMAN	P29966	MARCS_HUMAN	MARCKS	Myristoylated alanine-rich C-kinase substrate			1	7051721	MS/MS	STY:79.9663@EAPAEGEAAEPGS(0.0088)PT(0.0094)AAEGEAAS(0.0045)AAS(0.1955)S(0.1955)T(0.1955)S(0.1955)S(0.1955)PK;
EAPAEGEAAEPGSPTAAEGEAASAASSTSSPK	EAPAEGEAAEPGSPTAAEGEAASAAS[79.9663]S[79.9663]TSSPK	K	A	106	137	32	3	26S(79.9663),27S(79.9663)	sp|P29966|MARCS_HUMAN	P29966	MARCS_HUMAN	MARCKS	Myristoylated alanine-rich C-kinase substrate			3	8430002	MS/MS	STY:79.9663@EAPAEGEAAEPGS(0.1313)PT(0.1313)AAEGEAAS(0.1313)AAS(0.3212)S(0.3212)T(0.3212)S(0.3212)S(0.3212)PK;
EAPAEGEAAEPGSPTAAEGEAASAASSTSSPK	EAPAEGEAAEPGSPTAAEGEAAS[79.9663]AASSTSSPK	K	A	106	137	32	3	23S(79.9663)	sp|P29966|MARCS_HUMAN	P29966	MARCS_HUMAN	MARCKS	Myristoylated alanine-rich C-kinase substrate			4	5.5590416E7	MS/MS	STY:79.9663@EAPAEGEAAEPGS(0.1779)PT(0.0493)AAEGEAAS(0.7032)AAS(0.0139)S(0.0139)T(0.0139)S(0.0139)S(0.0139)PK;
EAPAEGEAAEPGSPTAAEGEAASAASSTSSPK	EAPAEGEAAEPGSPTAAEGEAAS[79.9663]AASSTS[79.9663]SPK	K	A	106	137	32	3	23S(79.9663),29S(79.9663)	sp|P29966|MARCS_HUMAN	P29966	MARCS_HUMAN	MARCKS	Myristoylated alanine-rich C-kinase substrate			1	8430002	MS/MS	STY:79.9663@EAPAEGEAAEPGS(0.2091)PT(0.2091)AAEGEAAS(0.7243)AAS(0.0280)S(0.0280)T(0.0211)S(0.7479)S(0.0325)PK;
EAPAEGEAAEPGSPTAAEGEAASAASSTSSPK	EAPAEGEAAEPGS[79.9663]PTAAEGEAASAASSTSSPK	K	A	106	137	32	3	13S(79.9663)	sp|P29966|MARCS_HUMAN	P29966	MARCS_HUMAN	MARCKS	Myristoylated alanine-rich C-kinase substrate			7	5.5590416E7	MS/MS	STY:79.9663@EAPAEGEAAEPGS(0.9150)PT(0.0171)AAEGEAAS(0.0107)AAS(0.0107)S(0.0102)T(0.0122)S(0.0122)S(0.0122)PK;
EAPAEGEAAEPGSPTAAEGEAASAASSTSSPK	EAPAEGEAAEPGS[79.9663]PT[79.9663]AAEGEAASAASSTSSPK	K	A	106	137	32	3	13S(79.9663),15T(79.9663)	sp|P29966|MARCS_HUMAN	P29966	MARCS_HUMAN	MARCKS	Myristoylated alanine-rich C-kinase substrate			1	8430002	MS/MS	STY:79.9663@EAPAEGEAAEPGS(0.2843)PT(0.2843)AAEGEAAS(0.0099)AAS(0.2843)S(0.2843)T(0.2843)S(0.2843)S(0.2843)PK;
EATNTTSEPSAPSQDLLDLSPSPR	EATNTTSEPSAPSQDLLDLS[79.9663]PSPR	K	M	302	325	24	3	20S(79.9663)	sp|O75674-2|TM1L1_HUMAN	O75674-2	TM1L1_HUMAN	TOM1L1	Isoform 2 of TOM1-like protein 1		sp|O75674-3|TM1L1_HUMAN, sp|O75674|TM1L1_HUMAN	1	0	MS/MS	STY:79.9663@EAT(0.0396)NT(0.0396)T(0.0396)S(0.0462)EPS(0.1248)APS(0.1248)QDLLDLS(0.2926)PS(0.2926)PR;
EDGGYTFTATPEDFPK	EDGGYTFT[79.9663]AT[79.9663]PEDFPK	R	K	170	185	16	2	10T(79.9663),8T(79.9663)	sp|Q9Y4P3|TBL2_HUMAN	Q9Y4P3	TBL2_HUMAN	TBL2	Transducin beta-like protein 2			1	2.349134E7	MS/MS	STY:79.9663@EDGGY(0.4808)T(0.4808)FT(0.5192)AT(0.5192)PEDFPK;
EDILENEDEQNSPPKK	EDILENEDEQNS[79.9663]PPKK	K	G	1272	1287	16	2	12S(79.9663)	sp|Q9NTI5|PDS5B_HUMAN	Q9NTI5	PDS5B_HUMAN	PDS5B	Sister chromatid cohesion protein PDS5 homolog B		sp|Q9NTI5-2|PDS5B_HUMAN, sp|Q9NTI5-5|PDS5B_HUMAN	3	4800215	MS/MS	STY:79.9663@EDILENEDEQNS(1.0000)PPKK;
EDKPPLAPSGGTEGPEQPPPPCPSQTGSPPVGLIK	EDKPPLAPSGGTEGPEQPPPPC[57.0215]PS[79.9663]QTGSPPVGLIK	K	G	607	641	35	3	22C(57.0215),24S(79.9663)	sp|Q8WWM7-2|ATX2L_HUMAN	Q8WWM7-2	ATX2L_HUMAN	ATXN2L	Isoform 2 of Ataxin-2-like protein		sp|Q8WWM7-3|ATX2L_HUMAN, sp|Q8WWM7-4|ATX2L_HUMAN, sp|Q8WWM7-5|ATX2L_HUMAN, sp|Q8WWM7-6|ATX2L_HUMAN, sp|Q8WWM7-8|ATX2L_HUMAN, sp|Q8WWM7-9|ATX2L_HUMAN, sp|Q8WWM7|ATX2L_HUMAN	2	7437354	MS/MS	STY:79.9663@EDKPPLAPS(0.0105)GGT(0.0118)EGPEQPPPPCPS(0.3259)QT(0.3259)GS(0.3259)PPVGLIK;
EDLPAENGETKTEESPASDEAGEK	EDLPAENGET[79.9663]KT[79.9663]EESPASDEAGEK	K	E	72	95	24	3	10T(79.9663),12T(79.9663)	sp|P05114|HMGN1_HUMAN	P05114	HMGN1_HUMAN	HMGN1	Non-histone chromosomal protein HMG-14			1	0	MS/MS	STY:79.9663@EDLPAENGET(0.5000)KT(0.5000)EES(0.5000)PAS(0.5000)DEAGEK;
EDNSEGEEILEEVGGDLEEEDDHHMEFCR	EDNS[79.9663]EGEEILEEVGGDLEEEDDHHMEFC[57.0215]R	K	V	425	453	29	3	28C(57.0215),4S(79.9663)	sp|Q14839-2|CHD4_HUMAN	Q14839-2	CHD4_HUMAN	CHD4	Isoform 2 of Chromodomain-helicase-DNA-binding protein 4		sp|Q14839|CHD4_HUMAN	1	0	MS/MS	STY:79.9663@EDNS(1.0000)EGEEILEEVGGDLEEEDDHHMEFCR;
EDSDEEEDDDSEEDEEDDEDEDEDEDEIEPAAMK	EDS[79.9663]DEEEDDDS[79.9663]EEDEEDDEDEDEDEDEIEPAAMK	K	A	143	176	34	3	11S(79.9663),3S(79.9663)	sp|P19338|NUCL_HUMAN	P19338	NUCL_HUMAN	NCL	Nucleolin			3	1.1925887E7	MS/MS	STY:79.9663@EDS(1.0000)DEEEDDDS(1.0000)EEDEEDDEDEDEDEDEIEPAAMK;
EDVPSER	EDVPS[79.9663]ER	K	Y	99	105	7	2	5S(79.9663)	sp|P02662|CASA1_BOVIN	P02662	CASA1_BOVIN	CSN1S1	Alpha-S1-casein			1	2.95259e+06	MS/MS	STY:79.9663@EDVPS(1.0000)ER;
EEDCHSPTSKPPKPDQPLK	EEDC[57.0215]HS[79.9663]PTSKPPKPDQPLK	K	V	415	433	19	3,4	4C(57.0215),6S(79.9663)	sp|P23588-2|IF4B_HUMAN	P23588-2	IF4B_HUMAN	EIF4B	Isoform 2 of Eukaryotic translation initiation factor 4B		sp|P23588|IF4B_HUMAN	4	2.4851316E7	MS/MS	STY:79.9663@EEDCHS(0.8428)PT(0.0786)S(0.0786)KPPKPDQPLK;
EEDEEPESPPEK	EEDEEPES[79.9663]PPEK	K	K	207	218	12	2	8S(79.9663)	sp|Q9H1E3|NUCKS_HUMAN	Q9H1E3	NUCKS_HUMAN	NUCKS1	Nuclear ubiquitous casein and cyclin-dependent kinase substrate 1		sp|Q9H1E3-2|NUCKS_HUMAN	20	3.8096032E7	MS/MS	STY:79.9663@EEDEEPES(1.0000)PPEK;
EEDEEPESPPEKK	EEDEEPES[79.9663]PPEKK	K	T	207	219	13	2	8S(79.9663)	sp|Q9H1E3|NUCKS_HUMAN	Q9H1E3	NUCKS_HUMAN	NUCKS1	Nuclear ubiquitous casein and cyclin-dependent kinase substrate 1		sp|Q9H1E3-2|NUCKS_HUMAN	2	3023774	MS/MS	STY:79.9663@EEDEEPES(1.0000)PPEKK;
EEDEPEERSGDETPGSEVPGDK	EEDEPEERS[79.9663]GDETPGSEVPGDK	R	A	153	174	22	3	9S(79.9663)	sp|Q1KMD3|HNRL2_HUMAN	Q1KMD3	HNRL2_HUMAN	HNRNPUL2	Heterogeneous nuclear ribonucleoprotein U-like protein 2			2	6688325	MS/MS	STY:79.9663@EEDEPEERS(0.8907)GDET(0.0538)PGS(0.0555)EVPGDK;
EEDESDDDNM	EEDES[79.9663]DDDNM	K	-	239	248	10	2	5S(79.9663)	sp|P25788-2|PSA3_HUMAN	P25788-2	PSA3_HUMAN	PSMA3	Isoform 2 of Proteasome subunit alpha type-3		sp|P25788|PSA3_HUMAN	1	1.56365e+06	MS/MS	STY:79.9663@EEDES(1.0000)DDDNM;
EEEEGISQESSEEEQ	EEEEGISQES[79.9663]S[79.9663]EEEQ	K	-	93	107	15	2	10S(79.9663),11S(79.9663)	sp|P17096|HMGA1_HUMAN	P17096	HMGA1_HUMAN	HMGA1	High mobility group protein HMG-I/HMG-Y		sp|P17096-2|HMGA1_HUMAN	3	4.6475672E7	MS/MS	STY:79.9663@EEEEGIS(0.2545)QES(0.8722)S(0.8733)EEEQ;
EEEEGISQESSEEEQ	EEEEGIS[79.9663]QESSEEEQ	K	-	93	107	15	2	7S(79.9663)	sp|P17096|HMGA1_HUMAN	P17096	HMGA1_HUMAN	HMGA1	High mobility group protein HMG-I/HMG-Y		sp|P17096-2|HMGA1_HUMAN	2	1.4352244E7	MS/MS	STY:79.9663@EEEEGIS(0.9017)QES(0.0340)S(0.0643)EEEQ;
EEEEGISQESSEEEQ	EEEEGIS[79.9663]QESS[79.9663]EEEQ	K	-	93	107	15	2	11S(79.9663),7S(79.9663)	sp|P17096|HMGA1_HUMAN	P17096	HMGA1_HUMAN	HMGA1	High mobility group protein HMG-I/HMG-Y		sp|P17096-2|HMGA1_HUMAN	1	3.445416E7	MS/MS	STY:79.9663@EEEEGIS(0.6578)QES(0.6578)S(0.6843)EEEQ;
EEEEGISQESSEEEQ	EEEEGIS[79.9663]QES[79.9663]SEEEQ	K	-	93	107	15	2	10S(79.9663),7S(79.9663)	sp|P17096|HMGA1_HUMAN	P17096	HMGA1_HUMAN	HMGA1	High mobility group protein HMG-I/HMG-Y		sp|P17096-2|HMGA1_HUMAN	4	8.0929832E7	MS/MS	STY:79.9663@EEEEGIS(0.6848)QES(0.6576)S(0.6576)EEEQ;
EEGSLSDTEADAVSGQLPDPTTNPSAGK	EEGSLSDTEADAVS[79.9663]GQLPDPTTNPSAGK	K	D	515	542	28	3	14S(79.9663)	sp|Q8N1G4|LRC47_HUMAN	Q8N1G4	LRC47_HUMAN	LRRC47	Leucine-rich repeat-containing protein 47			1	7376714	MS/MS	STY:79.9663@EEGS(0.1476)LS(0.1476)DT(0.1476)EADAVS(0.5301)GQLPDPT(0.0110)T(0.0080)NPS(0.0080)AGK;
EEGSLSDTEADAVSGQLPDPTTNPSAGK	EEGS[79.9663]LSDTEADAVSGQLPDPTTNPSAGK	K	D	515	542	28	3	4S(79.9663)	sp|Q8N1G4|LRC47_HUMAN	Q8N1G4	LRC47_HUMAN	LRRC47	Leucine-rich repeat-containing protein 47			1	7445076	MS/MS	STY:79.9663@EEGS(0.3203)LS(0.3203)DT(0.3203)EADAVS(0.0201)GQLPDPT(0.0064)T(0.0064)NPS(0.0063)AGK;
EELEQQTDGDCEEDEEEENDGETPK	EELEQQT[79.9663]DGDC[57.0215]EEDEEEENDGETPK	K	S	369	393	25	3	11C(57.0215),7T(79.9663)	sp|Q99442|SEC62_HUMAN	Q99442	SEC62_HUMAN	SEC62	Translocation protein SEC62			4	8346235	MS/MS	STY:79.9663@EELEQQT(0.8717)DGDCEEDEEEENDGET(0.1283)PK;
EELMSSDLEETAGSTSIPK	EELMS[79.9663]SDLEETAGSTSIPK	K	R	515	533	19	2,3	5S(79.9663)	sp|O00567|NOP56_HUMAN	O00567	NOP56_HUMAN	NOP56	Nucleolar protein 56			5	2.5877524E7	MS/MS	STY:79.9663@EELMS(0.4805)S(0.4805)DLEET(0.0097)AGS(0.0097)T(0.0097)S(0.0097)IPK;
EELMSSDLEETAGSTSIPK	EELM[15.9949]SSDLEETAGS[79.9663]TSIPK	K	R	515	533	19	2	14S(79.9663),4M(15.9949)	sp|O00567|NOP56_HUMAN	O00567	NOP56_HUMAN	NOP56	Nucleolar protein 56			1	3.23401e+06	MS/MS	STY:79.9663@EELMS(0.0936)S(0.0936)DLEET(0.0126)AGS(0.3943)T(0.3943)S(0.0116)IPK;M:15.9949@EELM(1.0000)SSDLEETAGSTSIPK;
EELQANGSAPAADKEEPAAAGSGAASPSAAEK	EELQANGSAPAADKEEPAAAGSGAAS[79.9663]PSAAEK	K	G	56	87	32	3	26S(79.9663)	sp|P29966|MARCS_HUMAN	P29966	MARCS_HUMAN	MARCKS	Myristoylated alanine-rich C-kinase substrate			1	3370097	MS/MS	STY:79.9663@EELQANGS(0.0847)APAADKEEPAAAGS(0.2814)GAAS(0.3170)PS(0.3170)AAEK;
EELQANGSAPAADKEEPAAAGSGAASPSAAEK	EELQANGS[79.9663]APAADKEEPAAAGSGAASPSAAEK	K	G	56	87	32	3	8S(79.9663)	sp|P29966|MARCS_HUMAN	P29966	MARCS_HUMAN	MARCKS	Myristoylated alanine-rich C-kinase substrate			1	3370097	MS/MS	STY:79.9663@EELQANGS(0.2500)APAADKEEPAAAGS(0.2500)GAAS(0.2500)PS(0.2500)AAEK;
EELTPGAPQHQLPPVPGSPEPYPGQQAPGPEPSQPLLELTPR	EELTPGAPQHQLPPVPGS[79.9663]PEPYPGQQAPGPEPSQPLLELTPR	K	A	143	184	42	4	18S(79.9663)	sp|Q9H6F5|CCD86_HUMAN	Q9H6F5	CCD86_HUMAN	CCDC86	Coiled-coil domain-containing protein 86			2	1.5278128E7	MS/MS	STY:79.9663@EELT(0.0275)PGAPQHQLPPVPGS(0.4747)PEPY(0.4747)PGQQAPGPEPS(0.0116)QPLLELT(0.0115)PR;
EENPESDGEPVVEDGTSVK	EENPES[79.9663]DGEPVVEDGTSVK	K	T	261	279	19	2	6S(79.9663)	sp|Q13439-3|GOGA4_HUMAN	Q13439-3	GOGA4_HUMAN	GOLGA4	Isoform 3 of Golgin subfamily A member 4		sp|Q13439-4|GOGA4_HUMAN, sp|Q13439-5|GOGA4_HUMAN, sp|Q13439|GOGA4_HUMAN	1	0	MS/MS	STY:79.9663@EENPES(0.7761)DGEPVVEDGT(0.1120)S(0.1120)VK;
EEPAAAGSGAASPSAAEK	EEPAAAGSGAASPS[79.9663]AAEK	K	G	70	87	18	2	14S(79.9663)	sp|P29966|MARCS_HUMAN	P29966	MARCS_HUMAN	MARCKS	Myristoylated alanine-rich C-kinase substrate			1	2.44145e+06	MS/MS	STY:79.9663@EEPAAAGS(0.1286)GAAS(0.1286)PS(0.7427)AAEK;
EEPAAAGSGAASPSAAEK	EEPAAAGSGAAS[79.9663]PSAAEK	K	G	70	87	18	2	12S(79.9663)	sp|P29966|MARCS_HUMAN	P29966	MARCS_HUMAN	MARCKS	Myristoylated alanine-rich C-kinase substrate			1	2.44145e+06	MS/MS	STY:79.9663@EEPAAAGS(0.0450)GAAS(0.4775)PS(0.4775)AAEK;
EESEESDEDMGFGLFD	EES[79.9663]EESDEDMGFGLFD	K	-	240	255	16	2	3S(79.9663)	sp|P05388-2|RLA0_HUMAN	P05388-2	RLA0_HUMAN	RPLP0	Isoform 2 of Large ribosomal subunit protein uL10	RPLP0P6	sp|P05388|RLA0_HUMAN, sp|Q8NHW5|RLA0L_HUMAN	1	2.26657e+06	MS/MS	STY:79.9663@EES(0.5000)EES(0.5000)DEDMGFGLFD;
EFITGDVEPTDAESEWHSENEEEEK	EFITGDVEPTDAESEWHS[79.9663]ENEEEEK	R	L	108	132	25	3	18S(79.9663)	sp|Q99733-2|NP1L4_HUMAN	Q99733-2	NP1L4_HUMAN	NAP1L4	Isoform 2 of Nucleosome assembly protein 1-like 4		sp|Q99733|NP1L4_HUMAN	2	1.03867112E8	MS/MS	STY:79.9663@EFIT(0.0266)GDVEPT(0.0426)DAES(0.0728)EWHS(0.8580)ENEEEEK;
EFITGDVEPTDAESEWHSENEEEEK	EFITGDVEPTDAES[79.9663]EWHSENEEEEK	R	L	108	132	25	3	14S(79.9663)	sp|Q99733-2|NP1L4_HUMAN	Q99733-2	NP1L4_HUMAN	NAP1L4	Isoform 2 of Nucleosome assembly protein 1-like 4		sp|Q99733|NP1L4_HUMAN	1	1.03867112E8	MS/MS	STY:79.9663@EFIT(0.0195)GDVEPT(0.0217)DAES(0.8710)EWHS(0.0878)ENEEEEK;
EFITGDVEPTDAESEWHSENEEEEK	EFITGDVEPT[79.9663]DAESEWHSENEEEEK	R	L	108	132	25	3	10T(79.9663)	sp|Q99733-2|NP1L4_HUMAN	Q99733-2	NP1L4_HUMAN	NAP1L4	Isoform 2 of Nucleosome assembly protein 1-like 4		sp|Q99733|NP1L4_HUMAN	1	2.7149492E7	MS/MS	STY:79.9663@EFIT(0.0100)GDVEPT(0.3300)DAES(0.3300)EWHS(0.3300)ENEEEEK;
EFITGDVEPTDAESEWHSENEEEEK	EFIT[79.9663]GDVEPTDAESEWHSENEEEEK	R	L	108	132	25	3	4T(79.9663)	sp|Q99733-2|NP1L4_HUMAN	Q99733-2	NP1L4_HUMAN	NAP1L4	Isoform 2 of Nucleosome assembly protein 1-like 4		sp|Q99733|NP1L4_HUMAN	2	1.298642E8	MS/MS	STY:79.9663@EFIT(0.9345)GDVEPT(0.0222)DAES(0.0220)EWHS(0.0213)ENEEEEK;
EGEDGDQPTTPPKPLK	EGEDGDQPT[79.9663]TPPKPLK	K	T	174	189	16	2	9T(79.9663)	sp|P18858-2|DNLI1_HUMAN	P18858-2	DNLI1_HUMAN	LIG1	Isoform 2 of DNA ligase 1		sp|P18858-3|DNLI1_HUMAN, sp|P18858|DNLI1_HUMAN	2	0	MS/MS	STY:79.9663@EGEDGDQPT(0.5000)T(0.5000)PPKPLK;
EGEELGEGERPEEDAAALELSSDEAVEVEEVIEESRAER	EGEELGEGERPEEDAAALELS[79.9663]S[79.9663]DEAVEVEEVIEESRAER	K	I	182	220	39	4	21S(79.9663),22S(79.9663)	sp|Q6NZI2|CAVN1_HUMAN	Q6NZI2	CAVN1_HUMAN	CAVIN1	Caveolae-associated protein 1			1	0	MS/MS	STY:79.9663@EGEELGEGERPEEDAAALELS(0.6812)S(0.6812)DEAVEVEEVIEES(0.6376)RAER;
EGEEPTVYSDEEEPKDESAR	EGEEPTVYSDEEEPKDES[79.9663]AR	K	K	121	140	20	2	18S(79.9663)	sp|O00264-2|PGRC1_HUMAN	O00264-2	PGRC1_HUMAN	PGRMC1	Isoform 2 of Membrane-associated progesterone receptor component 1		sp|O00264|PGRC1_HUMAN	1	4.5417328E7	MS/MS	STY:79.9663@EGEEPT(0.0299)VY(0.0299)S(0.0299)DEEEPKDES(0.9102)AR;
EGEEPTVYSDEEEPKDESARK	EGEEPTVYSDEEEPKDES[79.9663]ARK	K	N	121	141	21	3	18S(79.9663)	sp|O00264-2|PGRC1_HUMAN	O00264-2	PGRC1_HUMAN	PGRMC1	Isoform 2 of Membrane-associated progesterone receptor component 1		sp|O00264|PGRC1_HUMAN	1	6757401	MS/MS	STY:79.9663@EGEEPT(0.2133)VY(0.2133)S(0.2133)DEEEPKDES(0.3600)ARK;
EGEEPTVYSDEEEPK	EGEEPTVYS[79.9663]DEEEPK	K	D	121	135	15	2	9S(79.9663)	sp|O00264-2|PGRC1_HUMAN	O00264-2	PGRC1_HUMAN	PGRMC1	Isoform 2 of Membrane-associated progesterone receptor component 1		sp|O00264|PGRC1_HUMAN	2	3.8687012E7	MS/MS	STY:79.9663@EGEEPT(0.0337)VY(0.0309)S(0.9354)DEEEPK;
EGEEPTVYSDEEEPK	EGEEPTVY[79.9663]SDEEEPK	K	D	121	135	15	2	8Y(79.9663)	sp|O00264-2|PGRC1_HUMAN	O00264-2	PGRC1_HUMAN	PGRMC1	Isoform 2 of Membrane-associated progesterone receptor component 1		sp|O00264|PGRC1_HUMAN	1	3.8687012E7	MS/MS	STY:79.9663@EGEEPT(0.0219)VY(0.4890)S(0.4890)DEEEPK;
EGEEPTVYSDEEEPKDESAR	EGEEPTVY[79.9663]SDEEEPKDESAR	K	K	121	140	20	3	8Y(79.9663)	sp|O00264-2|PGRC1_HUMAN	O00264-2	PGRC1_HUMAN	PGRMC1	Isoform 2 of Membrane-associated progesterone receptor component 1		sp|O00264|PGRC1_HUMAN	1	5.3447628E7	MS/MS	STY:79.9663@EGEEPT(0.0263)VY(0.4798)S(0.4798)DEEEPKDES(0.0141)AR;
EGEEPTVYSDEEEPK	EGEEPT[79.9663]VYSDEEEPK	K	D	121	135	15	2	6T(79.9663)	sp|O00264-2|PGRC1_HUMAN	O00264-2	PGRC1_HUMAN	PGRMC1	Isoform 2 of Membrane-associated progesterone receptor component 1		sp|O00264|PGRC1_HUMAN	1	3.8687012E7	MS/MS	STY:79.9663@EGEEPT(0.3333)VY(0.3333)S(0.3333)DEEEPK;
EGEEPTVYSDEEEPKDESAR	EGEEPT[79.9663]VYSDEEEPKDESAR	K	K	121	140	20	2,3	6T(79.9663)	sp|O00264-2|PGRC1_HUMAN	O00264-2	PGRC1_HUMAN	PGRMC1	Isoform 2 of Membrane-associated progesterone receptor component 1		sp|O00264|PGRC1_HUMAN	5	9.886496E7	MS/MS	STY:79.9663@EGEEPT(0.3296)VY(0.3296)S(0.3296)DEEEPKDES(0.0111)AR;
EGEEPTVYSDEEEPKDESARK	EGEEPT[79.9663]VYSDEEEPKDESARK	K	N	121	141	21	3	6T(79.9663)	sp|O00264-2|PGRC1_HUMAN	O00264-2	PGRC1_HUMAN	PGRMC1	Isoform 2 of Membrane-associated progesterone receptor component 1		sp|O00264|PGRC1_HUMAN	2	2.325745E7	MS/MS	STY:79.9663@EGEEPT(0.3289)VY(0.3289)S(0.3289)DEEEPKDES(0.0133)ARK;
EGEETEGSEEDDKENDKTEEMPNDSVLENK	EGEETEGS[79.9663]EEDDKENDKT[79.9663]EEMPNDSVLENK	K	S	475	504	30	3	18T(79.9663),8S(79.9663)	sp|P49321-3|NASP_HUMAN	P49321-3	NASP_HUMAN	NASP	Isoform 3 of Nuclear autoantigenic sperm protein		sp|P49321-4|NASP_HUMAN, sp|P49321|NASP_HUMAN	1	1.7000498E7	MS/MS	STY:79.9663@EGEET(0.0929)EGS(0.8159)EEDDKENDKT(0.8112)EEMPNDS(0.2801)VLENK;
EGEETEGSEEDDKENDKTEEMPNDSVLENK	EGEET[79.9663]EGSEEDDKENDKTEEMPNDSVLENK	K	S	475	504	30	3	5T(79.9663)	sp|P49321-3|NASP_HUMAN	P49321-3	NASP_HUMAN	NASP	Isoform 3 of Nuclear autoantigenic sperm protein		sp|P49321-4|NASP_HUMAN, sp|P49321|NASP_HUMAN	2	3.64068e+06	MS/MS	STY:79.9663@EGEET(0.4726)EGS(0.4726)EEDDKENDKT(0.0342)EEMPNDS(0.0207)VLENK;
EGEETEGSEEDDKENDKTEEMPNDSVLENK	EGEET[79.9663]EGS[79.9663]EEDDKENDKTEEMPNDSVLENK	K	S	475	504	30	3,4	5T(79.9663),8S(79.9663)	sp|P49321-3|NASP_HUMAN	P49321-3	NASP_HUMAN	NASP	Isoform 3 of Nuclear autoantigenic sperm protein		sp|P49321-4|NASP_HUMAN, sp|P49321|NASP_HUMAN	4	3.0859136E7	MS/MS	STY:79.9663@EGEET(0.8052)EGS(0.8033)EEDDKENDKT(0.1957)EEMPNDS(0.1957)VLENK;
EGETQGVAFEHESPADFQNSQSPVQDQDK	EGET[79.9663]QGVAFEHESPADFQNSQSPVQDQDK	R	S	341	369	29	3	4T(79.9663)	sp|P78332-3|RBM6_HUMAN	P78332-3	RBM6_HUMAN	RBM6	Isoform 3 of RNA-binding protein 6		sp|P78332|RBM6_HUMAN	1	4.45933e+06	MS/MS	STY:79.9663@EGET(0.2500)QGVAFEHES(0.2500)PADFQNS(0.2500)QS(0.2500)PVQDQDK;
EGHSLEMENENLVENGADSDEDDNSFLK	EGHSLEMENENLVENGADSDEDDNS[79.9663]FLK	K	Q	508	535	28	3	25S(79.9663)	sp|Q9UHB6-2|LIMA1_HUMAN	Q9UHB6-2	LIMA1_HUMAN	LIMA1	Isoform Alpha of LIM domain and actin-binding protein 1		sp|Q9UHB6-3|LIMA1_HUMAN, sp|Q9UHB6-4|LIMA1_HUMAN, sp|Q9UHB6-5|LIMA1_HUMAN, sp|Q9UHB6|LIMA1_HUMAN	3	3.6613008E7	MS/MS	STY:79.9663@EGHS(0.0545)LEMENENLVENGADS(0.0592)DEDDNS(0.8863)FLK;
EGHSLEMENENLVENGADSDEDDNSFLK	EGHSLEMENENLVENGADS[79.9663]DEDDNSFLK	K	Q	508	535	28	3	19S(79.9663)	sp|Q9UHB6-2|LIMA1_HUMAN	Q9UHB6-2	LIMA1_HUMAN	LIMA1	Isoform Alpha of LIM domain and actin-binding protein 1		sp|Q9UHB6-3|LIMA1_HUMAN, sp|Q9UHB6-4|LIMA1_HUMAN, sp|Q9UHB6-5|LIMA1_HUMAN, sp|Q9UHB6|LIMA1_HUMAN	9	3.6613008E7	MS/MS	STY:79.9663@EGHS(0.0936)LEMENENLVENGADS(0.8429)DEDDNS(0.0634)FLK;
EGHSLEMENENLVENGADSDEDDNSFLK	EGHSLEM[15.9949]ENENLVENGADS[79.9663]DEDDNSFLK	K	Q	508	535	28	3	19S(79.9663),7M(15.9949)	sp|Q9UHB6-2|LIMA1_HUMAN	Q9UHB6-2	LIMA1_HUMAN	LIMA1	Isoform Alpha of LIM domain and actin-binding protein 1		sp|Q9UHB6-3|LIMA1_HUMAN, sp|Q9UHB6-4|LIMA1_HUMAN, sp|Q9UHB6-5|LIMA1_HUMAN, sp|Q9UHB6|LIMA1_HUMAN	1	1.419492E7	MS/MS	STY:79.9663@EGHS(0.2705)LEMENENLVENGADS(0.6797)DEDDNS(0.0499)FLK;M:15.9949@EGHSLEM(1.0000)ENENLVENGADSDEDDNSFLK;
EGHSLEMENENLVENGADSDEDDNSFLK	EGHS[79.9663]LEMENENLVENGADSDEDDNSFLK	K	Q	508	535	28	3	4S(79.9663)	sp|Q9UHB6-2|LIMA1_HUMAN	Q9UHB6-2	LIMA1_HUMAN	LIMA1	Isoform Alpha of LIM domain and actin-binding protein 1		sp|Q9UHB6-3|LIMA1_HUMAN, sp|Q9UHB6-4|LIMA1_HUMAN, sp|Q9UHB6-5|LIMA1_HUMAN, sp|Q9UHB6|LIMA1_HUMAN	1	3.0162264E7	MS/MS	STY:79.9663@EGHS(0.9216)LEMENENLVENGADS(0.0392)DEDDNS(0.0392)FLK;
EGHSLEMENENLVENGADSDEDDNSFLK	EGHS[79.9663]LEM[15.9949]ENENLVENGADSDEDDNSFLK	K	Q	508	535	28	3	4S(79.9663),7M(15.9949)	sp|Q9UHB6-2|LIMA1_HUMAN	Q9UHB6-2	LIMA1_HUMAN	LIMA1	Isoform Alpha of LIM domain and actin-binding protein 1		sp|Q9UHB6-3|LIMA1_HUMAN, sp|Q9UHB6-4|LIMA1_HUMAN, sp|Q9UHB6-5|LIMA1_HUMAN, sp|Q9UHB6|LIMA1_HUMAN	2	1.419492E7	MS/MS	STY:79.9663@EGHS(0.9060)LEMENENLVENGADS(0.0470)DEDDNS(0.0470)FLK;M:15.9949@EGHSLEM(1.0000)ENENLVENGADSDEDDNSFLK;
EGITGPPADSSKPIGPDDAIDALSSDFTCGSPTAAGK	EGITGPPADSSKPIGPDDAIDALS[79.9663]SDFTC[57.0215]GSPTAAGK	K	K	274	310	37	3	24S(79.9663),29C(57.0215)	sp|P20810-10|ICAL_HUMAN	P20810-10	ICAL_HUMAN	CAST	Isoform 10 of Calpastatin		sp|P20810-4|ICAL_HUMAN, sp|P20810-6|ICAL_HUMAN, sp|P20810-7|ICAL_HUMAN, sp|P20810-8|ICAL_HUMAN, sp|P20810-9|ICAL_HUMAN, sp|P20810|ICAL_HUMAN	1	2.1058548E7	MS/MS	STY:79.9663@EGIT(0.0853)GPPADS(0.0280)S(0.0280)KPIGPDDAIDALS(0.3685)S(0.3685)DFT(0.0406)CGS(0.0406)PT(0.0406)AAGK;
EGITGPPADSSKPIGPDDAIDALSSDFTCGSPTAAGK	EGIT[79.9663]GPPADSSKPIGPDDAIDALSSDFTC[57.0215]GSPTAAGK	K	K	274	310	37	3	29C(57.0215),4T(79.9663)	sp|P20810-10|ICAL_HUMAN	P20810-10	ICAL_HUMAN	CAST	Isoform 10 of Calpastatin		sp|P20810-4|ICAL_HUMAN, sp|P20810-6|ICAL_HUMAN, sp|P20810-7|ICAL_HUMAN, sp|P20810-8|ICAL_HUMAN, sp|P20810-9|ICAL_HUMAN, sp|P20810|ICAL_HUMAN	1	2.1058548E7	MS/MS	STY:79.9663@EGIT(0.1680)GPPADS(0.1680)S(0.1680)KPIGPDDAIDALS(0.0418)S(0.0418)DFT(0.1375)CGS(0.1375)PT(0.1375)AAGK;
EGKPEIEGKPESEGEPGSETR	EGKPEIEGKPES[79.9663]EGEPGSETR	R	A	234	254	21	3	12S(79.9663)	sp|Q96EI5-2|TCAL4_HUMAN	Q96EI5-2	TCAL4_HUMAN	TCEAL4	Isoform 2 of Transcription elongation factor A protein-like 4		sp|Q96EI5|TCAL4_HUMAN	1	1219701	MS/MS	STY:79.9663@EGKPEIEGKPES(0.4432)EGEPGS(0.4432)ET(0.1135)R;
EGLRPGDTTSTFCGTPNYIAPEILR	EGLRPGDT[79.9663]TSTFC[57.0215]GTPNYIAPEILR	K	G	402	426	25	3	13C(57.0215),8T(79.9663)	sp|P41743|KPCI_HUMAN	P41743	KPCI_HUMAN	PRKCI	Protein kinase C iota type			1	0	MS/MS	STY:79.9663@EGLRPGDT(0.1667)T(0.1667)S(0.1667)T(0.1667)FCGT(0.1667)PNY(0.1667)IAPEILR;
EGMNPSYDEYADSDEDQHDAYLER	EGMNPSYDEYADSDEDQHDAY[79.9663]LER	K	M	432	455	24	3	21Y(79.9663)	sp|Q08945|SSRP1_HUMAN	Q08945	SSRP1_HUMAN	SSRP1	FACT complex subunit SSRP1			2	1.12636592E8	MS/MS	STY:79.9663@EGMNPS(0.0187)Y(0.0187)DEY(0.0212)ADS(0.0173)DEDQHDAY(0.9241)LER;
EGMNPSYDEYADSDEDQHDAYLER	EGMNPSYDEYADS[79.9663]DEDQHDAYLER	K	M	432	455	24	3	13S(79.9663)	sp|Q08945|SSRP1_HUMAN	Q08945	SSRP1_HUMAN	SSRP1	FACT complex subunit SSRP1			2	1.15578936E8	MS/MS	STY:79.9663@EGMNPS(0.0205)Y(0.0205)DEY(0.0711)ADS(0.8724)DEDQHDAY(0.0156)LER;
EGMNPSYDEYADSDEDQHDAYLER	EGMNPSYDEY[79.9663]ADSDEDQHDAYLER	K	M	432	455	24	3	10Y(79.9663)	sp|Q08945|SSRP1_HUMAN	Q08945	SSRP1_HUMAN	SSRP1	FACT complex subunit SSRP1			3	1.15578936E8	MS/MS	STY:79.9663@EGMNPS(0.0175)Y(0.0175)DEY(0.4614)ADS(0.4614)DEDQHDAY(0.0424)LER;
EGMNPSYDEYADSDEDQHDAYLER	EGMNPS[79.9663]YDEYADSDEDQHDAYLER	K	M	432	455	24	3	6S(79.9663)	sp|Q08945|SSRP1_HUMAN	Q08945	SSRP1_HUMAN	SSRP1	FACT complex subunit SSRP1			4	1.15578936E8	MS/MS	STY:79.9663@EGMNPS(0.7471)Y(0.0632)DEY(0.0632)ADS(0.0632)DEDQHDAY(0.0632)LER;
EGMNPSYDEYADSDEDQHDAYLER	EGM[15.9949]NPSYDEY[79.9663]ADSDEDQHDAYLER	K	M	432	455	24	3	10Y(79.9663),3M(15.9949)	sp|Q08945|SSRP1_HUMAN	Q08945	SSRP1_HUMAN	SSRP1	FACT complex subunit SSRP1			1	2.5172878E7	MS/MS	STY:79.9663@EGMNPS(0.0132)Y(0.0132)DEY(0.3245)ADS(0.3245)DEDQHDAY(0.3245)LER;M:15.9949@EGM(1.0000)NPSYDEYADSDEDQHDAYLER;
EGMNPSYDEYADSDEDQHDAYLER	EGM[15.9949]NPS[79.9663]YDEYADSDEDQHDAYLER	K	M	432	455	24	3	3M(15.9949),6S(79.9663)	sp|Q08945|SSRP1_HUMAN	Q08945	SSRP1_HUMAN	SSRP1	FACT complex subunit SSRP1			4	2.5172878E7	MS/MS	STY:79.9663@EGMNPS(0.2484)Y(0.2484)DEY(0.2484)ADS(0.2484)DEDQHDAY(0.0065)LER;M:15.9949@EGM(1.0000)NPSYDEYADSDEDQHDAYLER;
EGSPIPHDPEFGSK	EGS[79.9663]PIPHDPEFGSK	R	L	280	293	14	2	3S(79.9663)	sp|P85037-2|FOXK1_HUMAN	P85037-2	FOXK1_HUMAN	FOXK1	Isoform 2 of Forkhead box protein K1		sp|P85037|FOXK1_HUMAN	1	0	MS/MS	STY:79.9663@EGS(0.5000)PIPHDPEFGS(0.5000)K;
EHHPEEGSSGSEVEEIPETPCESQGEELK	EHHPEEGS[79.9663]SGSEVEEIPET[79.9663]PC[57.0215]ES[79.9663]QGEELK	K	E	657	685	29	3	19T(79.9663),21C(57.0215),23S(79.9663),8S(79.9663)	sp|Q12888-2|TP53B_HUMAN	Q12888-2	TP53B_HUMAN	TP53BP1	Isoform 2 of TP53-binding protein 1		sp|Q12888-3|TP53B_HUMAN, sp|Q12888|TP53B_HUMAN	1	0	MS/MS	STY:79.9663@EHHPEEGS(0.5877)S(0.5877)GS(0.5877)EVEEIPET(0.6181)PCES(0.6188)QGEELK;
EHHPEEGSSGSEVEEIPETPCESQGEELK	EHHPEEGS[79.9663]S[79.9663]GS[79.9663]EVEEIPETPC[57.0215]ESQGEELK	K	E	657	685	29	3	11S(79.9663),21C(57.0215),8S(79.9663),9S(79.9663)	sp|Q12888-2|TP53B_HUMAN	Q12888-2	TP53B_HUMAN	TP53BP1	Isoform 2 of TP53-binding protein 1		sp|Q12888-3|TP53B_HUMAN, sp|Q12888|TP53B_HUMAN	2	2.12853e+06	MS/MS	STY:79.9663@EHHPEEGS(0.7192)S(0.7192)GS(0.7192)EVEEIPET(0.7192)PCES(0.1231)QGEELK;
EHMMDGVTTRTFCGTPDYIAPEIIAYQPYGK	EHMMDGVT[79.9663]TRTFC[57.0215]GTPDYIAPEIIAYQPYGK	K	S	487	517	31	3	13C(57.0215),8T(79.9663)	sp|P17252|KPCA_HUMAN	P17252	KPCA_HUMAN	PRKCA	Protein kinase C alpha type			1	0	MS/MS	STY:79.9663@EHMMDGVT(0.1739)T(0.1739)RT(0.1739)FCGT(0.1196)PDY(0.1196)IAPEIIAY(0.1196)QPY(0.1196)GK;
EIAIVHSDAEK	EIAIVHS[79.9663]DAEK	K	E	341	351	11	2	7S(79.9663)	sp|Q9H307|PININ_HUMAN	Q9H307	PININ_HUMAN	PNN	Pinin			3	9419207	MS/MS	STY:79.9663@EIAIVHS(1.0000)DAEK;
EIAIVHSDAEKEQEEEEQK	EIAIVHS[79.9663]DAEKEQEEEEQK	K	Q	341	359	19	3	7S(79.9663)	sp|Q9H307|PININ_HUMAN	Q9H307	PININ_HUMAN	PNN	Pinin			2	6876491	MS/MS	STY:79.9663@EIAIVHS(1.0000)DAEKEQEEEEQK;
EIPSATQSPISK	EIPS[79.9663]ATQSPISK	K	K	1156	1167	12	2	4S(79.9663)	sp|Q9BQG0-2|MBB1A_HUMAN	Q9BQG0-2	MBB1A_HUMAN	MYBBP1A	Isoform 2 of Myb-binding protein 1A		sp|Q9BQG0|MBB1A_HUMAN	1	3.15725e+06	MS/MS	STY:79.9663@EIPS(0.2500)AT(0.2500)QS(0.2500)PIS(0.2500)K;
EIQNGNLHESDSESVPR	EIQNGNLHESDSES[79.9663]VPR	K	D	66	82	17	3	14S(79.9663)	sp|Q86UP2-2|KTN1_HUMAN	Q86UP2-2	KTN1_HUMAN	KTN1	Isoform 2 of Kinectin		sp|Q86UP2-3|KTN1_HUMAN, sp|Q86UP2-4|KTN1_HUMAN, sp|Q86UP2|KTN1_HUMAN	1	2.4012e+06	MS/MS	STY:79.9663@EIQNGNLHES(0.2805)DS(0.2805)ES(0.4390)VPR;
EIQNGNLHESDSESVPR	EIQNGNLHES[79.9663]DSESVPR	K	D	66	82	17	2,3	10S(79.9663)	sp|Q86UP2-2|KTN1_HUMAN	Q86UP2-2	KTN1_HUMAN	KTN1	Isoform 2 of Kinectin		sp|Q86UP2-3|KTN1_HUMAN, sp|Q86UP2-4|KTN1_HUMAN, sp|Q86UP2|KTN1_HUMAN	4	2.4012e+06	MS/MS	STY:79.9663@EIQNGNLHES(0.9234)DS(0.0317)ES(0.0450)VPR;
EISDDEAEEEK	EIS[79.9663]DDEAEEEK	K	G	224	234	11	2	3S(79.9663)	sp|P08238|HS90B_HUMAN	P08238	HS90B_HUMAN	HSP90AB1	Heat shock protein HSP 90-beta	HSP90AB3P	sp|Q58FF7|H90B3_HUMAN	19	3.35534592E8	MS/MS	STY:79.9663@EIS(1.0000)DDEAEEEK;
EISDDEAEEEKGEK	EIS[79.9663]DDEAEEEKGEK	K	E	224	237	14	2	3S(79.9663)	sp|P08238|HS90B_HUMAN	P08238	HS90B_HUMAN	HSP90AB1	Heat shock protein HSP 90-beta	HSP90AB3P	sp|Q58FF7|H90B3_HUMAN	2	0	MS/MS	STY:79.9663@EIS(1.0000)DDEAEEEKGEK;
EISPGSGPGEIR	EIS[79.9663]PGSGPGEIR	K	K	643	654	12	2	3S(79.9663)	sp|O43491-4|E41L2_HUMAN	O43491-4	E41L2_HUMAN	EPB41L2	Isoform 4 of Band 4.1-like protein 2		sp|O43491|E41L2_HUMAN	1	1.01743e+06	MS/MS	STY:79.9663@EIS(0.6732)PGS(0.3268)GPGEIR;
EKEISDDEAEEEK	EKEIS[79.9663]DDEAEEEK	R	G	222	234	13	2,3	5S(79.9663)	sp|P08238|HS90B_HUMAN	P08238	HS90B_HUMAN	HSP90AB1	Heat shock protein HSP 90-beta			10	4.8939864E7	MS/MS	STY:79.9663@EKEIS(1.0000)DDEAEEEK;
EKPDSDDDLDIASLVTAK	EKPDS[79.9663]DDDLDIASLVTAK	R	L	655	672	18	2	5S(79.9663)	sp|Q86V48-2|LUZP1_HUMAN	Q86V48-2	LUZP1_HUMAN	LUZP1	Isoform 2 of Leucine zipper protein 1		sp|Q86V48-3|LUZP1_HUMAN, sp|Q86V48|LUZP1_HUMAN	1	6746502	MS/MS	STY:79.9663@EKPDS(0.8988)DDDLDIAS(0.0357)LVT(0.0655)AK;
EKPELSEPSHLNGPSSDPEAAFLSR	EKPELSEPSHLNGPS[79.9663]SDPEAAFLSR	K	D	1750	1774	25	3	15S(79.9663)	sp|Q9H4A3-2|WNK1_HUMAN	Q9H4A3-2	WNK1_HUMAN	WNK1	Isoform 2 of Serine/threonine-protein kinase WNK1		sp|Q9H4A3-4|WNK1_HUMAN, sp|Q9H4A3-5|WNK1_HUMAN, sp|Q9H4A3-6|WNK1_HUMAN, sp|Q9H4A3-7|WNK1_HUMAN, sp|Q9H4A3|WNK1_HUMAN	1	1.34146E7	MS/MS	STY:79.9663@EKPELS(0.0196)EPS(0.0269)HLNGPS(0.4695)S(0.4695)DPEAAFLS(0.0145)R;
EKPELSEPSHLNGPSSDPEAAFLSR	EKPELS[79.9663]EPSHLNGPSSDPEAAFLSR	K	D	1750	1774	25	3	6S(79.9663)	sp|Q9H4A3-2|WNK1_HUMAN	Q9H4A3-2	WNK1_HUMAN	WNK1	Isoform 2 of Serine/threonine-protein kinase WNK1		sp|Q9H4A3-4|WNK1_HUMAN, sp|Q9H4A3-5|WNK1_HUMAN, sp|Q9H4A3-6|WNK1_HUMAN, sp|Q9H4A3-7|WNK1_HUMAN, sp|Q9H4A3|WNK1_HUMAN	1	1.3363029E7	MS/MS	STY:79.9663@EKPELS(0.3952)EPS(0.0087)HLNGPS(0.1987)S(0.1987)DPEAAFLS(0.1987)R;
EKTPELPEPSVK	EKTPELPEPS[79.9663]VK	K	V	218	229	12	2	10S(79.9663)	sp|Q8IYB3|SRRM1_HUMAN	Q8IYB3	SRRM1_HUMAN	SRRM1	Serine/arginine repetitive matrix protein 1		sp|Q8IYB3-2|SRRM1_HUMAN	1	0	MS/MS	STY:79.9663@EKT(0.3651)PELPEPS(0.6349)VK;
EKTPELPEPSVK	EKT[79.9663]PELPEPSVK	K	V	218	229	12	2	3T(79.9663)	sp|Q8IYB3|SRRM1_HUMAN	Q8IYB3	SRRM1_HUMAN	SRRM1	Serine/arginine repetitive matrix protein 1		sp|Q8IYB3-2|SRRM1_HUMAN	4	6198585	MS/MS	STY:79.9663@EKT(0.7859)PELPEPS(0.2141)VK;
EKTPSPKEEDEEPESPPEK	EKT[79.9663]PSPKEEDEEPES[79.9663]PPEK	K	K	200	218	19	3	15S(79.9663),3T(79.9663)	sp|Q9H1E3|NUCKS_HUMAN	Q9H1E3	NUCKS_HUMAN	NUCKS1	Nuclear ubiquitous casein and cyclin-dependent kinase substrate 1		sp|Q9H1E3-2|NUCKS_HUMAN	5	1.4213732E7	MS/MS	STY:79.9663@EKT(0.7094)PS(0.5881)PKEEDEEPES(0.7025)PPEK;
EKTPSPKEEDEEPESPPEK	EKT[79.9663]PS[79.9663]PKEEDEEPESPPEK	K	K	200	218	19	3	3T(79.9663),5S(79.9663)	sp|Q9H1E3|NUCKS_HUMAN	Q9H1E3	NUCKS_HUMAN	NUCKS1	Nuclear ubiquitous casein and cyclin-dependent kinase substrate 1		sp|Q9H1E3-2|NUCKS_HUMAN	2	1.4213732E7	MS/MS	STY:79.9663@EKT(0.8948)PS(0.8955)PKEEDEEPES(0.2097)PPEK;
EKTPSPKEEDEEPESPPEK	EKT[79.9663]PS[79.9663]PKEEDEEPES[79.9663]PPEK	K	K	200	218	19	2,3	15S(79.9663),3T(79.9663),5S(79.9663)	sp|Q9H1E3|NUCKS_HUMAN	Q9H1E3	NUCKS_HUMAN	NUCKS1	Nuclear ubiquitous casein and cyclin-dependent kinase substrate 1		sp|Q9H1E3-2|NUCKS_HUMAN	16	1.24316568E8	MS/MS	STY:79.9663@EKT(1.0000)PS(1.0000)PKEEDEEPES(1.0000)PPEK;
ELDEEGSDPPLPGR	ELDEEGS[79.9663]DPPLPGR	R	A	169	182	14	2	7S(79.9663)	sp|Q9BRJ6|CG050_HUMAN	Q9BRJ6	CG050_HUMAN	C7orf50	Uncharacterized protein C7orf50			1	2.58681e+06	MS/MS	STY:79.9663@ELDEEGS(1.0000)DPPLPGR;
ELEENDSENSEFEDDGSEK	ELEENDS[79.9663]ENS[79.9663]EFEDDGS[79.9663]EK	K	V	591	609	19	2	10S(79.9663),17S(79.9663),7S(79.9663)	sp|O43719|HTSF1_HUMAN	O43719	HTSF1_HUMAN	HTATSF1	HIV Tat-specific factor 1			1	4.42025e+06	MS/MS	STY:79.9663@ELEENDS(1.0000)ENS(1.0000)EFEDDGS(1.0000)EK;
ELQGDGPPSSPTNDPTVK	ELQGDGPPSSPT[79.9663]NDPTVK	K	Y	704	721	18	2	12T(79.9663)	sp|Q12873-2|CHD3_HUMAN	Q12873-2	CHD3_HUMAN	CHD3	Isoform 2 of Chromodomain-helicase-DNA-binding protein 3		sp|Q12873-3|CHD3_HUMAN, sp|Q12873|CHD3_HUMAN	1	1.43456e+06	MS/MS	STY:79.9663@ELQGDGPPS(0.2111)S(0.2111)PT(0.2889)NDPT(0.2889)VK;
ELSNSPLRENSFGSPLEFR	ELSNSPLRENSFGS[79.9663]PLEFR	K	N	1316	1334	19	3	14S(79.9663)	sp|Q9UQ35|SRRM2_HUMAN	Q9UQ35	SRRM2_HUMAN	SRRM2	Serine/arginine repetitive matrix protein 2		sp|Q9UQ35-2|SRRM2_HUMAN	1	3944027	MS/MS	STY:79.9663@ELS(0.0536)NS(0.0536)PLRENS(0.0536)FGS(0.8391)PLEFR;
ELSNSPLRENSFGSPLEFR	ELS[79.9663]NSPLRENSFGSPLEFR	K	N	1316	1334	19	3	3S(79.9663)	sp|Q9UQ35|SRRM2_HUMAN	Q9UQ35	SRRM2_HUMAN	SRRM2	Serine/arginine repetitive matrix protein 2		sp|Q9UQ35-2|SRRM2_HUMAN	1	3944027	MS/MS	STY:79.9663@ELS(0.3209)NS(0.3209)PLRENS(0.3209)FGS(0.0372)PLEFR;
ELSNSPLRENSFGSPLEFR	ELS[79.9663]NS[79.9663]PLRENSFGSPLEFR	K	N	1316	1334	19	3	3S(79.9663),5S(79.9663)	sp|Q9UQ35|SRRM2_HUMAN	Q9UQ35	SRRM2_HUMAN	SRRM2	Serine/arginine repetitive matrix protein 2		sp|Q9UQ35-2|SRRM2_HUMAN	1	2.93364e+06	MS/MS	STY:79.9663@ELS(0.6480)NS(0.6480)PLRENS(0.6480)FGS(0.0561)PLEFR;
EMDTARTPLSEAEFEEIMNR	EMDT[79.9663]ARTPLSEAEFEEIMNR	R	N	438	457	20	3	4T(79.9663)	sp|Q16630-2|CPSF6_HUMAN	Q16630-2	CPSF6_HUMAN	CPSF6	Isoform 2 of Cleavage and polyadenylation specificity factor subunit 6		sp|Q16630-3|CPSF6_HUMAN, sp|Q16630|CPSF6_HUMAN	1	0	MS/MS	STY:79.9663@EMDT(0.3333)ART(0.3333)PLS(0.3333)EAEFEEIMNR;
EMEHNTVCAAGTSPVGEIGEEK	EMEHNTVC[57.0215]AAGT[79.9663]SPVGEIGEEK	K	I	1544	1565	22	3	12T(79.9663),8C(57.0215)	sp|P18583-10|SON_HUMAN	P18583-10	SON_HUMAN	SON	Isoform J of Protein SON		sp|P18583-2|SON_HUMAN, sp|P18583-3|SON_HUMAN, sp|P18583-4|SON_HUMAN, sp|P18583-5|SON_HUMAN, sp|P18583-6|SON_HUMAN, sp|P18583-7|SON_HUMAN, sp|P18583-9|SON_HUMAN, sp|P18583|SON_HUMAN	1	3.44635e+06	MS/MS	STY:79.9663@EMEHNT(0.0427)VCAAGT(0.4787)S(0.4787)PVGEIGEEK;
EMLASDDEEDVSSK	EMLAS[79.9663]DDEEDVSSK	K	V	76	89	14	2	5S(79.9663)	sp|Q0ZGT2-2|NEXN_HUMAN	Q0ZGT2-2	NEXN_HUMAN	NEXN	Isoform 2 of Nexilin		sp|Q0ZGT2-3|NEXN_HUMAN, sp|Q0ZGT2-4|NEXN_HUMAN, sp|Q0ZGT2|NEXN_HUMAN	3	1.2300897E7	MS/MS	STY:79.9663@EMLAS(0.9382)DDEEDVS(0.0309)S(0.0309)K;
EMLMEDVGSEEEQEEEDEAPFQEK	EMLMEDVGS[79.9663]EEEQEEEDEAPFQEK	R	D	105	128	24	3	9S(79.9663)	sp|Q9H1E3|NUCKS_HUMAN	Q9H1E3	NUCKS_HUMAN	NUCKS1	Nuclear ubiquitous casein and cyclin-dependent kinase substrate 1		sp|Q9H1E3-2|NUCKS_HUMAN	1	0	MS/MS	STY:79.9663@EMLMEDVGS(1.0000)EEEQEEEDEAPFQEK;
EMLASDDEEDVSSK	EM[15.9949]LAS[79.9663]DDEEDVSSK	K	V	76	89	14	2	2M(15.9949),5S(79.9663)	sp|Q0ZGT2-2|NEXN_HUMAN	Q0ZGT2-2	NEXN_HUMAN	NEXN	Isoform 2 of Nexilin		sp|Q0ZGT2-3|NEXN_HUMAN, sp|Q0ZGT2-4|NEXN_HUMAN, sp|Q0ZGT2|NEXN_HUMAN	1	1.92284e+06	MS/MS	STY:79.9663@EMLAS(0.8641)DDEEDVS(0.0679)S(0.0679)K;M:15.9949@EM(1.0000)LASDDEEDVSSK;
EMLMEDVGSEEEQEEEDEAPFQEK	EM[15.9949]LMEDVGS[79.9663]EEEQEEEDEAPFQEK	R	D	105	128	24	3	2M(15.9949),9S(79.9663)	sp|Q9H1E3|NUCKS_HUMAN	Q9H1E3	NUCKS_HUMAN	NUCKS1	Nuclear ubiquitous casein and cyclin-dependent kinase substrate 1		sp|Q9H1E3-2|NUCKS_HUMAN	1	0	MS/MS	STY:79.9663@EMLMEDVGS(1.0000)EEEQEEEDEAPFQEK;M:15.9949@EM(0.5000)LM(0.5000)EDVGSEEEQEEEDEAPFQEK;
ENDSSEEVDVFQGSSPVDDIPQEETEEEEVSTVNVR	ENDSSEEVDVFQGS[79.9663]SPVDDIPQEETEEEEVSTVNVR	K	R	1403	1438	36	3	14S(79.9663)	sp|Q9NTI5|PDS5B_HUMAN	Q9NTI5	PDS5B_HUMAN	PDS5B	Sister chromatid cohesion protein PDS5 homolog B			1	0	MS/MS	STY:79.9663@ENDS(0.0107)S(0.0107)EEVDVFQGS(0.1957)S(0.1957)PVDDIPQEET(0.1957)EEEEVS(0.1957)T(0.1957)VNVR;
ENPPVEDSSDEDDK	ENPPVEDS[79.9663]SDEDDK	R	R	491	504	14	2	8S(79.9663)	sp|Q8TCJ2|STT3B_HUMAN	Q8TCJ2	STT3B_HUMAN	STT3B	Dolichyl-diphosphooligosaccharide--protein glycosyltransferase subunit STT3B			2	3.56563e+06	MS/MS	STY:79.9663@ENPPVEDS(0.5000)S(0.5000)DEDDK;
ENPPVEDSSDEDDK	ENPPVEDS[79.9663]S[79.9663]DEDDK	R	R	491	504	14	2	8S(79.9663),9S(79.9663)	sp|Q8TCJ2|STT3B_HUMAN	Q8TCJ2	STT3B_HUMAN	STT3B	Dolichyl-diphosphooligosaccharide--protein glycosyltransferase subunit STT3B			4	7.84986e+06	MS/MS	STY:79.9663@ENPPVEDS(1.0000)S(1.0000)DEDDK;
ENVEYIEREESDGEYDEFGR	ENVEYIEREES[79.9663]DGEYDEFGR	R	K	110	129	20	3	11S(79.9663)	sp|O95218-2|ZRAB2_HUMAN	O95218-2	ZRAB2_HUMAN	ZRANB2	Isoform 2 of Zinc finger Ran-binding domain-containing protein 2		sp|O95218|ZRAB2_HUMAN	1	2.1638904E7	MS/MS	STY:79.9663@ENVEY(0.1500)IEREES(0.8035)DGEY(0.0465)DEFGR;
ENVEYIEREESDGEYDEFGRK	ENVEYIEREES[79.9663]DGEYDEFGRK	R	K	110	130	21	3	11S(79.9663)	sp|O95218-2|ZRAB2_HUMAN	O95218-2	ZRAB2_HUMAN	ZRANB2	Isoform 2 of Zinc finger Ran-binding domain-containing protein 2		sp|O95218|ZRAB2_HUMAN	1	2.2153766E7	MS/MS	STY:79.9663@ENVEY(0.2569)IEREES(0.7074)DGEY(0.0357)DEFGRK;
ENVEYIEREESDGEYDEFGR	ENVEY[79.9663]IEREESDGEYDEFGR	R	K	110	129	20	2,3	5Y(79.9663)	sp|O95218-2|ZRAB2_HUMAN	O95218-2	ZRAB2_HUMAN	ZRANB2	Isoform 2 of Zinc finger Ran-binding domain-containing protein 2		sp|O95218|ZRAB2_HUMAN	5	2.1638904E7	MS/MS	STY:79.9663@ENVEY(0.4891)IEREES(0.4891)DGEY(0.0218)DEFGR;
ENVEYIEREESDGEYDEFGRK	ENVEY[79.9663]IEREESDGEYDEFGRK	R	K	110	130	21	3	5Y(79.9663)	sp|O95218-2|ZRAB2_HUMAN	O95218-2	ZRAB2_HUMAN	ZRANB2	Isoform 2 of Zinc finger Ran-binding domain-containing protein 2		sp|O95218|ZRAB2_HUMAN	3	2.2153766E7	MS/MS	STY:79.9663@ENVEY(0.8255)IEREES(0.1460)DGEY(0.0286)DEFGRK;
ENYSDSEEEDDDDVASSR	ENYSDS[79.9663]EEEDDDDVASSR	R	Q	256	273	18	2	6S(79.9663)	sp|Q9Y2U8|MAN1_HUMAN	Q9Y2U8	MAN1_HUMAN	LEMD3	Inner nuclear membrane protein Man1			1	0	MS/MS	STY:79.9663@ENY(0.1109)S(0.1109)DS(0.7383)EEEDDDDVAS(0.0200)S(0.0200)R;
EPAITSQNSPEAREESTSSGNVSNR	EPAITS[79.9663]QNSPEAREESTSSGNVSNR	K	K	71	95	25	3	6S(79.9663)	sp|P23193-2|TCEA1_HUMAN	P23193-2	TCEA1_HUMAN	TCEA1	Isoform 2 of Transcription elongation factor A protein 1		sp|P23193|TCEA1_HUMAN	1	3.53948e+06	MS/MS	STY:79.9663@EPAIT(0.0064)S(0.1419)QNS(0.1419)PEAREES(0.1419)T(0.1419)S(0.1419)S(0.1419)GNVS(0.1419)NR;
EPAITSQNSPEAR	EPAIT[79.9663]SQNSPEAR	K	E	71	83	13	2	5T(79.9663)	sp|P23193-2|TCEA1_HUMAN	P23193-2	TCEA1_HUMAN	TCEA1	Isoform 2 of Transcription elongation factor A protein 1		sp|P23193|TCEA1_HUMAN	3	6459311	MS/MS	STY:79.9663@EPAIT(0.3333)S(0.3333)QNS(0.3333)PEAR;
EPALPLEPDSGGNTSPGVTANGEAR	EPALPLEPDSGGNT[79.9663]SPGVTANGEAR	R	T	681	705	25	3	14T(79.9663)	sp|Q92974-2|ARHG2_HUMAN	Q92974-2	ARHG2_HUMAN	ARHGEF2	Isoform 2 of Rho guanine nucleotide exchange factor 2		sp|Q92974-3|ARHG2_HUMAN, sp|Q92974|ARHG2_HUMAN	1	5560411	MS/MS	STY:79.9663@EPALPLEPDS(0.0706)GGNT(0.3098)S(0.3098)PGVT(0.3098)ANGEAR;
EPALPLEPDSGGNTSPGVTANGEAR	EPALPLEPDS[79.9663]GGNTSPGVTANGEAR	R	T	681	705	25	3	10S(79.9663)	sp|Q92974-2|ARHG2_HUMAN	Q92974-2	ARHG2_HUMAN	ARHGEF2	Isoform 2 of Rho guanine nucleotide exchange factor 2		sp|Q92974-3|ARHG2_HUMAN, sp|Q92974|ARHG2_HUMAN	1	5616243	MS/MS	STY:79.9663@EPALPLEPDS(0.3297)GGNT(0.3297)S(0.3297)PGVT(0.0108)ANGEAR;
EPEMPGPREESEEEEDEDDEEEEEEEK	EPEMPGPREES[79.9663]EEEEDEDDEEEEEEEK	K	G	22	48	27	3	11S(79.9663)	sp|P35659-2|DEK_HUMAN	P35659-2	DEK_HUMAN	DEK	Isoform 2 of Protein DEK		sp|P35659|DEK_HUMAN	12	9.01988E7	MS/MS	STY:79.9663@EPEMPGPREES(1.0000)EEEEDEDDEEEEEEEK;
EPEMPGPREESEEEEDEDDEEEEEEEK	EPEM[15.9949]PGPREES[79.9663]EEEEDEDDEEEEEEEK	K	G	22	48	27	3	11S(79.9663),4M(15.9949)	sp|P35659-2|DEK_HUMAN	P35659-2	DEK_HUMAN	DEK	Isoform 2 of Protein DEK		sp|P35659|DEK_HUMAN	4	1.392698E7	MS/MS	STY:79.9663@EPEMPGPREES(1.0000)EEEEDEDDEEEEEEEK;M:15.9949@EPEM(1.0000)PGPREESEEEEDEDDEEEEEEEK;
EPPRASPPGGLAEPPGSAGPQAGPTVVPGSATPMETGIAETPEGR	EPPRASPPGGLAEPPGS[79.9663]AGPQAGPTVVPGSATPMETGIAETPEGR	K	R	64	108	45	4	17S(79.9663)	sp|O60341-2|KDM1A_HUMAN	O60341-2	KDM1A_HUMAN	KDM1A	Isoform 2 of Lysine-specific histone demethylase 1A		sp|O60341|KDM1A_HUMAN	1	1.83521e+06	MS/MS	STY:79.9663@EPPRAS(0.0250)PPGGLAEPPGS(0.2385)AGPQAGPT(0.2385)VVPGS(0.2385)AT(0.2385)PMET(0.0139)GIAET(0.0071)PEGR;
EPSEVPTPK	EPSEVPT[79.9663]PK	K	R	47	55	9	2	7T(79.9663)	sp|P17096|HMGA1_HUMAN	P17096	HMGA1_HUMAN	HMGA1	High mobility group protein HMG-I/HMG-Y		sp|P17096-2|HMGA1_HUMAN, sp|P17096-3|HMGA1_HUMAN	2	2.0287e+06	MS/MS	STY:79.9663@EPS(0.0890)EVPT(0.9110)PK;
EPSEVPTPK	EPS[79.9663]EVPTPK	K	R	47	55	9	2	3S(79.9663)	sp|P17096|HMGA1_HUMAN	P17096	HMGA1_HUMAN	HMGA1	High mobility group protein HMG-I/HMG-Y		sp|P17096-2|HMGA1_HUMAN, sp|P17096-3|HMGA1_HUMAN	1	0	MS/MS	STY:79.9663@EPS(0.5000)EVPT(0.5000)PK;
EPVADEEEEDSDDDVEPITEFR	EPVADEEEEDSDDDVEPIT[79.9663]EFR	K	F	92	113	22	3	19T(79.9663)	sp|P54105|ICLN_HUMAN	P54105	ICLN_HUMAN	CLNS1A	Methylosome subunit pICln			2	4.98356e+06	MS/MS	STY:79.9663@EPVADEEEEDS(0.1595)DDDVEPIT(0.8405)EFR;
EPVADEEEEDSDDDVEPITEFR	EPVADEEEEDS[79.9663]DDDVEPITEFR	K	F	92	113	22	3	11S(79.9663)	sp|P54105|ICLN_HUMAN	P54105	ICLN_HUMAN	CLNS1A	Methylosome subunit pICln			1	4.98356e+06	MS/MS	STY:79.9663@EPVADEEEEDS(0.8947)DDDVEPIT(0.1053)EFR;
EQEESLGSPVHHSPFDAQTTGDGTEDPSLTALR	EQEESLGSPVHHS[79.9663]PFDAQTTGDGTEDPSLTALR	K	M	428	460	33	4	13S(79.9663)	sp|Q9NP74-2|PALMD_HUMAN	Q9NP74-2	PALMD_HUMAN	PALMD	Isoform 2 of Palmdelphin		sp|Q9NP74-3|PALMD_HUMAN, sp|Q9NP74|PALMD_HUMAN	1	2.79727e+06	MS/MS	STY:79.9663@EQEES(0.0424)LGS(0.0424)PVHHS(0.2255)PFDAQT(0.2255)T(0.2255)GDGT(0.0061)EDPS(0.1163)LT(0.1163)ALR;
EQEESLGSPVHHSPFDAQTTGDGTEDPSLTALR	EQEESLGS[79.9663]PVHHSPFDAQTTGDGTEDPSLTALR	K	M	428	460	33	3	8S(79.9663)	sp|Q9NP74-2|PALMD_HUMAN	Q9NP74-2	PALMD_HUMAN	PALMD	Isoform 2 of Palmdelphin		sp|Q9NP74-3|PALMD_HUMAN, sp|Q9NP74|PALMD_HUMAN	1	0	MS/MS	STY:79.9663@EQEES(0.0370)LGS(0.1812)PVHHS(0.1812)PFDAQT(0.1812)T(0.1812)GDGT(0.0093)EDPS(0.1143)LT(0.1143)ALR;
EQGTESRSSTPLPTISSSAENTR	EQGT[79.9663]ES[79.9663]RSSTPLPTISSSAENTR	R	Q	151	173	23	3	4T(79.9663),6S(79.9663)	sp|P42167-2|LAP2B_HUMAN	P42167-2	LAP2B_HUMAN	TMPO	Isoform Gamma of Lamina-associated polypeptide 2, isoforms beta/gamma		sp|P42166|LAP2A_HUMAN, sp|P42167-3|LAP2B_HUMAN, sp|P42167|LAP2B_HUMAN	1	3.04605e+06	MS/MS	STY:79.9663@EQGT(0.3213)ES(0.3213)RS(0.3213)S(0.3213)T(0.3213)PLPT(0.0787)IS(0.0787)S(0.0787)S(0.0787)AENT(0.0787)R;
EQLSTSEENSK	EQLSTS[79.9663]EENS[79.9663]K	R	K	141	151	11	2	10S(79.9663),6S(79.9663)	sp|P02663|CASA2_BOVIN	P02663	CASA2_BOVIN	CSN1S2	Alpha-S2-casein			1	1.1144291E7	MS/MS	STY:79.9663@EQLS(0.3109)T(0.3109)S(0.6891)EENS(0.6891)K;
EQLSTSEENSK	EQLS[79.9663]TSEENSK	R	K	141	151	11	2	4S(79.9663)	sp|P02663|CASA2_BOVIN	P02663	CASA2_BOVIN	CSN1S2	Alpha-S2-casein			1	0	MS/MS	STY:79.9663@EQLS(0.2500)T(0.2500)S(0.2500)EENS(0.2500)K;
EQLSTSEENSK	EQLS[79.9663]TS[79.9663]EENSK	R	K	141	151	11	2	4S(79.9663),6S(79.9663)	sp|P02663|CASA2_BOVIN	P02663	CASA2_BOVIN	CSN1S2	Alpha-S2-casein			1	0	MS/MS	STY:79.9663@EQLS(0.9272)T(0.0636)S(0.9264)EENS(0.0829)K;
EQLSTSEENSK	EQLS[79.9663]T[79.9663]SEENSK	R	K	141	151	11	2	4S(79.9663),5T(79.9663)	sp|P02663|CASA2_BOVIN	P02663	CASA2_BOVIN	CSN1S2	Alpha-S2-casein			4	1.5571502E7	MS/MS	STY:79.9663@EQLS(0.6790)T(0.6313)S(0.6313)EENS(0.0583)K;
EQLSTSEENSKK	EQLS[79.9663]T[79.9663]SEENSKK	R	T	141	152	12	2	4S(79.9663),5T(79.9663)	sp|P02663|CASA2_BOVIN	P02663	CASA2_BOVIN	CSN1S2	Alpha-S2-casein			3	1.5950324E7	MS/MS	STY:79.9663@EQLS(0.6453)T(0.6453)S(0.6453)EENS(0.0641)KK;
EQPEMEDANSEK	EQPEMEDANS[79.9663]EK	R	S	11	22	12	2	10S(79.9663)	sp|Q13523|PRP4B_HUMAN	Q13523	PRP4B_HUMAN	PRPF4B	Serine/threonine-protein kinase PRP4 homolog			1	1.16846e+06	MS/MS	STY:79.9663@EQPEMEDANS(1.0000)EK;
EQSEVSVSPR	EQSEVSVS[79.9663]PR	K	A	25	34	10	2	8S(79.9663)	sp|Q7L4I2|RSRC2_HUMAN	Q7L4I2	RSRC2_HUMAN	RSRC2	Arginine/serine-rich coiled-coil protein 2			1	4.68644e+06	MS/MS	STY:79.9663@EQS(0.1148)EVS(0.1148)VS(0.7704)PR;
EQSEVSVSPR	EQS[79.9663]EVSVSPR	K	A	25	34	10	2	3S(79.9663)	sp|Q7L4I2|RSRC2_HUMAN	Q7L4I2	RSRC2_HUMAN	RSRC2	Arginine/serine-rich coiled-coil protein 2			1	4951513	MS/MS	STY:79.9663@EQS(0.4771)EVS(0.4771)VS(0.0458)PR;
ERDHSPTPSVFNSDEER	ERDHS[79.9663]PTPSVFNSDEER	R	Y	414	430	17	3	5S(79.9663)	sp|Q6UN15-3|FIP1_HUMAN	Q6UN15-3	FIP1_HUMAN	FIP1L1	Isoform 3 of Pre-mRNA 3'-end-processing factor FIP1		sp|Q6UN15-5|FIP1_HUMAN, sp|Q6UN15|FIP1_HUMAN	3	3.13146e+06	MS/MS	STY:79.9663@ERDHS(0.3288)PT(0.3288)PS(0.3288)VFNS(0.0137)DEER;
EREESEDELEEANGNNPIDIEVDQNK	EREES[79.9663]EDELEEANGNNPIDIEVDQNK	R	E	256	281	26	3	5S(79.9663)	sp|Q9UKL0|RCOR1_HUMAN	Q9UKL0	RCOR1_HUMAN	RCOR1	REST corepressor 1			4	5.63861e+06	MS/MS	STY:79.9663@EREES(1.0000)EDELEEANGNNPIDIEVDQNK;
ERPAEPLTPPPSYGHQPQTGSGESSGASGDK	ERPAEPLT[79.9663]PPPSYGHQPQTGSGESSGASGDK	K	D	9	39	31	4	8T(79.9663)	sp|O43294-2|TGFI1_HUMAN	O43294-2	TGFI1_HUMAN	TGFB1I1	Isoform 2 of Transforming growth factor beta-1-induced transcript 1 protein		sp|O43294|TGFI1_HUMAN	1	3.12684e+06	MS/MS	STY:79.9663@ERPAEPLT(0.1919)PPPS(0.1919)Y(0.1919)GHQPQT(0.1919)GS(0.1919)GES(0.0135)S(0.0135)GAS(0.0135)GDK;
ERPISLGIFPLPAGDGLLTPDAQK	ERPIS[79.9663]LGIFPLPAGDGLLTPDAQK	K	G	199	222	24	3	5S(79.9663)	sp|O60271-2|JIP4_HUMAN	O60271-2	JIP4_HUMAN	SPAG9	Isoform 2 of C-Jun-amino-terminal kinase-interacting protein 4		sp|O60271-3|JIP4_HUMAN, sp|O60271-4|JIP4_HUMAN, sp|O60271-5|JIP4_HUMAN, sp|O60271-9|JIP4_HUMAN, sp|O60271|JIP4_HUMAN	1	0	MS/MS	STY:79.9663@ERPIS(0.5786)LGIFPLPAGDGLLT(0.4214)PDAQK;
ERRTPSDDEEDNLFAPPK	ERRT[79.9663]PS[79.9663]DDEEDNLFAPPK	K	L	328	345	18	3	4T(79.9663),6S(79.9663)	sp|Q641Q2-2|WAC2A_HUMAN	Q641Q2-2	WAC2A_HUMAN	WASHC2A	Isoform 2 of WASH complex subunit 2A	WASHC2C	sp|Q641Q2|WAC2A_HUMAN, sp|Q9Y4E1-1|WAC2C_HUMAN, sp|Q9Y4E1-2|WAC2C_HUMAN, sp|Q9Y4E1-3|WAC2C_HUMAN, sp|Q9Y4E1-4|WAC2C_HUMAN, sp|Q9Y4E1-6|WAC2C_HUMAN, sp|Q9Y4E1|WAC2C_HUMAN	1	2283536	MS/MS	STY:79.9663@ERRT(1.0000)PS(1.0000)DDEEDNLFAPPK;
ERSPSPLRGNVVPSPLPTR	ERSPS[79.9663]PLRGNVVPS[79.9663]PLPTR	R	R	28	46	19	3	14S(79.9663),5S(79.9663)	sp|Q9Y2V2|CHSP1_HUMAN	Q9Y2V2	CHSP1_HUMAN	CARHSP1	Calcium-regulated heat-stable protein 1			1	7.17366e+06	MS/MS	STY:79.9663@ERS(0.2167)PS(0.5944)PLRGNVVPS(0.5944)PLPT(0.5944)R;
ERSPSPLRGNVVPSPLPTR	ERS[79.9663]PSPLRGNVVPS[79.9663]PLPT[79.9663]R	R	R	28	46	19	3	14S(79.9663),18T(79.9663),3S(79.9663)	sp|Q9Y2V2|CHSP1_HUMAN	Q9Y2V2	CHSP1_HUMAN	CARHSP1	Calcium-regulated heat-stable protein 1			1	1.943225E7	MS/MS	STY:79.9663@ERS(0.7397)PS(0.7397)PLRGNVVPS(0.7603)PLPT(0.7603)R;
ESASPTIPNLDLLEAHTK	ESASPT[79.9663]IPNLDLLEAHTK	R	E	536	553	18	3	6T(79.9663)	sp|O75151|PHF2_HUMAN	O75151	PHF2_HUMAN	PHF2	Lysine-specific demethylase PHF2			1	0	MS/MS	STY:79.9663@ES(0.0541)AS(0.0541)PT(0.8623)IPNLDLLEAHT(0.0296)K;
ESDQTLAALLSPK	ESDQTLAALLS[79.9663]PK	K	E	1687	1699	13	2	11S(79.9663)	sp|P18583-10|SON_HUMAN	P18583-10	SON_HUMAN	SON	Isoform J of Protein SON		sp|P18583-2|SON_HUMAN, sp|P18583-3|SON_HUMAN, sp|P18583-4|SON_HUMAN, sp|P18583-5|SON_HUMAN, sp|P18583-6|SON_HUMAN, sp|P18583-7|SON_HUMAN, sp|P18583-9|SON_HUMAN, sp|P18583|SON_HUMAN	1	6.80946e+06	MS/MS	STY:79.9663@ES(0.0515)DQT(0.0412)LAALLS(0.9074)PK;
ESEDKPEIEDVGSDEEEEK	ESEDKPEIEDVGS[79.9663]DEEEEK	K	K	373	391	19	2,3	13S(79.9663)	sp|P07900-2|HS90A_HUMAN	P07900-2	HS90A_HUMAN	HSP90AA1	Isoform 2 of Heat shock protein HSP 90-alpha		sp|P07900|HS90A_HUMAN	7	1.70756544E8	MS/MS	STY:79.9663@ES(0.0646)EDKPEIEDVGS(0.9354)DEEEEK;
ESEDKPEIEDVGSDEEEEKK	ESEDKPEIEDVGS[79.9663]DEEEEKK	K	D	373	392	20	3,4	13S(79.9663)	sp|P07900-2|HS90A_HUMAN	P07900-2	HS90A_HUMAN	HSP90AA1	Isoform 2 of Heat shock protein HSP 90-alpha		sp|P07900|HS90A_HUMAN	12	1.60156813E9	MS/MS	STY:79.9663@ES(0.0596)EDKPEIEDVGS(0.9404)DEEEEKK;
ESEQESEEEILAQK	ESEQES[79.9663]EEEILAQK	K	K	222	235	14	2	6S(79.9663)	sp|Q9BW71|HIRP3_HUMAN	Q9BW71	HIRP3_HUMAN	HIRIP3	HIRA-interacting protein 3			1	0	MS/MS	STY:79.9663@ES(0.1282)EQES(0.8718)EEEILAQK;
ESLKEEDESDDDNM	ESLKEEDES[79.9663]DDDNM	K	-	235	248	14	2	9S(79.9663)	sp|P25788-2|PSA3_HUMAN	P25788-2	PSA3_HUMAN	PSMA3	Isoform 2 of Proteasome subunit alpha type-3		sp|P25788|PSA3_HUMAN	3	1.00450112E8	MS/MS	STY:79.9663@ES(0.0858)LKEEDES(0.9142)DDDNM;
ESLKEEDESDDDNM	ESLKEEDES[79.9663]DDDNM[15.9949]	K	-	235	248	14	2	14M(15.9949),9S(79.9663)	sp|P25788-2|PSA3_HUMAN	P25788-2	PSA3_HUMAN	PSMA3	Isoform 2 of Proteasome subunit alpha type-3		sp|P25788|PSA3_HUMAN	2	5128852	MS/MS	STY:79.9663@ES(0.0831)LKEEDES(0.9169)DDDNM;M:15.9949@ESLKEEDESDDDNM(1.0000);
ESPRPLQLPGAEGPAISDGEEGGGEPGAGGGAAGAAGAGRR	ESPRPLQLPGAEGPAIS[79.9663]DGEEGGGEPGAGGGAAGAAGAGRR	R	D	74	114	41	4	17S(79.9663)	sp|Q6PKG0|LARP1_HUMAN	Q6PKG0	LARP1_HUMAN	LARP1	La-related protein 1			1	0	MS/MS	STY:79.9663@ES(0.1093)PRPLQLPGAEGPAIS(0.8907)DGEEGGGEPGAGGGAAGAAGAGRR;
ESSANNSVSPSESLR	ESSANNSVS[79.9663]PSESLR	R	A	195	209	15	2	9S(79.9663)	sp|Q04726-2|TLE3_HUMAN	Q04726-2	TLE3_HUMAN	TLE3	Isoform 2 of Transducin-like enhancer protein 3		sp|Q04726-3|TLE3_HUMAN, sp|Q04726-4|TLE3_HUMAN, sp|Q04726-5|TLE3_HUMAN, sp|Q04726-6|TLE3_HUMAN, sp|Q04726-7|TLE3_HUMAN, sp|Q04726|TLE3_HUMAN	1	3085816	MS/MS	STY:79.9663@ES(0.0359)S(0.0359)ANNS(0.0359)VS(0.2975)PS(0.2975)ES(0.2975)LR;
ESSPLYSPTFSDSTSAVK	ESSPLYS[79.9663]PT[79.9663]FSDSTSAVK	R	E	1791	1808	18	2	7S(79.9663),9T(79.9663)	sp|P46821|MAP1B_HUMAN	P46821	MAP1B_HUMAN	MAP1B	Microtubule-associated protein 1B			1	4574787	MS/MS	STY:79.9663@ES(0.0702)S(0.0702)PLY(0.0702)S(0.2982)PT(0.2982)FS(0.2982)DS(0.2982)T(0.2982)S(0.2982)AVK;
ESSPLYSPTFSDSTSAVK	ESSPLY[79.9663]SPTFSDSTSAVK	R	E	1791	1808	18	2	6Y(79.9663)	sp|P46821|MAP1B_HUMAN	P46821	MAP1B_HUMAN	MAP1B	Microtubule-associated protein 1B			1	4.63172e+06	MS/MS	STY:79.9663@ES(0.0286)S(0.0286)PLY(0.4504)S(0.4504)PT(0.0084)FS(0.0084)DS(0.0084)T(0.0084)S(0.0084)AVK;
ESVPEFPLSPPK	ESVPEFPLS[79.9663]PPK	K	K	30	41	12	2	9S(79.9663)	sp|P16949-2|STMN1_HUMAN	P16949-2	STMN1_HUMAN	STMN1	Isoform 2 of Stathmin		sp|P16949|STMN1_HUMAN	6	4.0712152E7	MS/MS	STY:79.9663@ES(0.0622)VPEFPLS(0.9378)PPK;
ESEDKPEIEDVGSDEEEEK	ES[79.9663]EDKPEIEDVGSDEEEEK	K	K	373	391	19	3	2S(79.9663)	sp|P07900-2|HS90A_HUMAN	P07900-2	HS90A_HUMAN	HSP90AA1	Isoform 2 of Heat shock protein HSP 90-alpha		sp|P07900|HS90A_HUMAN	2	9.5569216E7	MS/MS	STY:79.9663@ES(0.6962)EDKPEIEDVGS(0.3038)DEEEEK;
ESEDKPEIEDVGSDEEEEKK	ES[79.9663]EDKPEIEDVGSDEEEEKK	K	D	373	392	20	3	2S(79.9663)	sp|P07900-2|HS90A_HUMAN	P07900-2	HS90A_HUMAN	HSP90AA1	Isoform 2 of Heat shock protein HSP 90-alpha		sp|P07900|HS90A_HUMAN	2	8.6609395E8	MS/MS	STY:79.9663@ES(0.9287)EDKPEIEDVGS(0.0713)DEEEEKK;
ESEQESEEEILAQKK	ES[79.9663]EQESEEEILAQKK	K	E	222	236	15	2	2S(79.9663)	sp|Q9BW71|HIRP3_HUMAN	Q9BW71	HIRP3_HUMAN	HIRIP3	HIRA-interacting protein 3			1	0	MS/MS	STY:79.9663@ES(0.5000)EQES(0.5000)EEEILAQKK;
ESKEEETSIDVAGKPNEVTK	ES[79.9663]KEEETSIDVAGKPNEVTK	K	A	460	479	20	3	2S(79.9663)	sp|P53985|MOT1_HUMAN	P53985	MOT1_HUMAN	SLC16A1	Monocarboxylate transporter 1			1	3.98762e+06	MS/MS	STY:79.9663@ES(0.5035)KEEET(0.1655)S(0.1655)IDVAGKPNEVT(0.1655)K;
ESLKEEDESDDDNM	ES[79.9663]LKEEDESDDDNM	K	-	235	248	14	2	2S(79.9663)	sp|P25788-2|PSA3_HUMAN	P25788-2	PSA3_HUMAN	PSMA3	Isoform 2 of Proteasome subunit alpha type-3		sp|P25788|PSA3_HUMAN	2	1.00450112E8	MS/MS	STY:79.9663@ES(0.5000)LKEEDES(0.5000)DDDNM;
ESLKEEDESDDDNM	ES[79.9663]LKEEDESDDDNM[15.9949]	K	-	235	248	14	2	14M(15.9949),2S(79.9663)	sp|P25788-2|PSA3_HUMAN	P25788-2	PSA3_HUMAN	PSMA3	Isoform 2 of Proteasome subunit alpha type-3		sp|P25788|PSA3_HUMAN	2	1.0370899E7	MS/MS	STY:79.9663@ES(0.7187)LKEEDES(0.2813)DDDNM;M:15.9949@ESLKEEDESDDDNM(1.0000);
ESPRPLQLPGAEGPAISDGEEGGGEPGAGGGAAGAAGAGR	ES[79.9663]PRPLQLPGAEGPAISDGEEGGGEPGAGGGAAGAAGAGR	R	R	74	113	40	3,4	2S(79.9663)	sp|Q6PKG0|LARP1_HUMAN	Q6PKG0	LARP1_HUMAN	LARP1	La-related protein 1			3	1.0806033E7	MS/MS	STY:79.9663@ES(0.6974)PRPLQLPGAEGPAIS(0.3026)DGEEGGGEPGAGGGAAGAAGAGR;
ESRQESDPEDDDVK	ES[79.9663]RQESDPEDDDVK	R	K	95	108	14	2,3	2S(79.9663)	sp|Q9H307|PININ_HUMAN	Q9H307	PININ_HUMAN	PNN	Pinin			3	6110565	MS/MS	STY:79.9663@ES(0.5000)RQES(0.5000)DPEDDDVK;
ESSPLYSPTFSDSTSAVK	ES[79.9663]SPLYSPTFSDSTSAVK	R	E	1791	1808	18	2	2S(79.9663)	sp|P46821|MAP1B_HUMAN	P46821	MAP1B_HUMAN	MAP1B	Microtubule-associated protein 1B			4	4.63172e+06	MS/MS	STY:79.9663@ES(0.4519)S(0.4519)PLY(0.0236)S(0.0236)PT(0.0098)FS(0.0098)DS(0.0098)T(0.0098)S(0.0098)AVK;
ESSTSEGADQKMSSPEDDSDTK	ES[79.9663]S[79.9663]TSEGADQKMSSPEDDSDTK	K	R	302	323	22	3	2S(79.9663),3S(79.9663)	sp|Q15424-2|SAFB1_HUMAN	Q15424-2	SAFB1_HUMAN	SAFB	Isoform 2 of Scaffold attachment factor B1		sp|Q15424-3|SAFB1_HUMAN, sp|Q15424-4|SAFB1_HUMAN, sp|Q15424|SAFB1_HUMAN	1	0	MS/MS	STY:79.9663@ES(0.2500)S(0.2500)T(0.2500)S(0.2500)EGADQKMS(0.2500)S(0.2500)PEDDS(0.2500)DT(0.2500)K;
ESTQLSPADLTEGKPTDPSK	ES[79.9663]TQLSPADLTEGKPTDPSK	R	L	416	435	20	3	2S(79.9663)	sp|Q08J23-2|NSUN2_HUMAN	Q08J23-2	NSUN2_HUMAN	NSUN2	Isoform 2 of RNA cytosine C(5)-methyltransferase NSUN2		sp|Q08J23-3|NSUN2_HUMAN, sp|Q08J23|NSUN2_HUMAN	4	7.69288e+06	MS/MS	STY:79.9663@ES(0.3199)T(0.3199)QLS(0.3199)PADLT(0.0253)EGKPT(0.0075)DPS(0.0075)K;
ESTSSKSPPRK	ES[79.9663]TSSKSPPRK	K	I	776	786	11	3	2S(79.9663)	sp|P78347-2|GTF2I_HUMAN	P78347-2	GTF2I_HUMAN	GTF2I	Isoform 2 of General transcription factor II-I		sp|P78347-3|GTF2I_HUMAN, sp|P78347-4|GTF2I_HUMAN, sp|P78347|GTF2I_HUMAN	1	3328695	MS/MS	STY:79.9663@ES(0.2000)T(0.2000)S(0.2000)S(0.2000)KS(0.2000)PPRK;
ESVASGDDRAEEDMDEAIEK	ES[79.9663]VASGDDRAEEDMDEAIEK	R	G	991	1010	20	3	2S(79.9663)	sp|P46821|MAP1B_HUMAN	P46821	MAP1B_HUMAN	MAP1B	Microtubule-associated protein 1B			1	0	MS/MS	STY:79.9663@ES(0.5000)VAS(0.5000)GDDRAEEDMDEAIEK;
ESVPEFPLSPPK	ES[79.9663]VPEFPLSPPK	K	K	30	41	12	2	2S(79.9663)	sp|P16949-2|STMN1_HUMAN	P16949-2	STMN1_HUMAN	STMN1	Isoform 2 of Stathmin		sp|P16949|STMN1_HUMAN	3	4.0712152E7	MS/MS	STY:79.9663@ES(0.7895)VPEFPLS(0.2105)PPK;
ETEEQDSDSAEQGDPAGEGK	ETEEQDS[79.9663]DSAEQGDPAGEGK	R	E	54	73	20	2	7S(79.9663)	sp|O95361|TRI16_HUMAN	O95361	TRI16_HUMAN	TRIM16	Tripartite motif-containing protein 16			1	4.07151e+06	MS/MS	STY:79.9663@ET(0.1335)EEQDS(0.4333)DS(0.4333)AEQGDPAGEGK;
ETPAATEAPSSTPK	ETPAATEAPS[79.9663]STPK	K	A	185	198	14	2	10S(79.9663)	sp|P80723|BASP1_HUMAN	P80723	BASP1_HUMAN	BASP1	Brain acid soluble protein 1		sp|P80723-2|BASP1_HUMAN	3	0	MS/MS	STY:79.9663@ET(0.0073)PAAT(0.0098)EAPS(0.3276)S(0.3276)T(0.3276)PK;
ETPHSPGVEDAPIAK	ETPHS[79.9663]PGVEDAPIAK	R	V	326	340	15	2,3	5S(79.9663)	sp|Q9UHB6-2|LIMA1_HUMAN	Q9UHB6-2	LIMA1_HUMAN	LIMA1	Isoform Alpha of LIM domain and actin-binding protein 1		sp|Q9UHB6-3|LIMA1_HUMAN, sp|Q9UHB6-4|LIMA1_HUMAN, sp|Q9UHB6-5|LIMA1_HUMAN, sp|Q9UHB6|LIMA1_HUMAN	4	2.3282406E7	MS/MS	STY:79.9663@ET(0.0896)PHS(0.9104)PGVEDAPIAK;
ETQSPEQVK	ETQS[79.9663]PEQVK	K	S	491	499	9	2	4S(79.9663)	sp|Q9NYF8-2|BCLF1_HUMAN	Q9NYF8-2	BCLF1_HUMAN	BCLAF1	Isoform 2 of Bcl-2-associated transcription factor 1		sp|Q9NYF8-3|BCLF1_HUMAN, sp|Q9NYF8|BCLF1_HUMAN	1	6.83154e+06	MS/MS	STY:79.9663@ET(0.0817)QS(0.9183)PEQVK;
ETVQTTQSPTPVEK	ETVQT[79.9663]TQSPTPVEK	K	E	676	689	14	2	5T(79.9663)	sp|Q9UPN6-2|SCAF8_HUMAN	Q9UPN6-2	SCAF8_HUMAN	SCAF8	Isoform 2 of SR-related and CTD-associated factor 8		sp|Q9UPN6|SCAF8_HUMAN	1	0	MS/MS	STY:79.9663@ET(0.0234)VQT(0.8880)T(0.0296)QS(0.0296)PT(0.0296)PVEK;
ETEEQDSDSAEQGDPAGEGK	ET[79.9663]EEQDSDSAEQGDPAGEGK	R	E	54	73	20	2	2T(79.9663)	sp|O95361|TRI16_HUMAN	O95361	TRI16_HUMAN	TRIM16	Tripartite motif-containing protein 16			2	4.07151e+06	MS/MS	STY:79.9663@ET(0.3333)EEQDS(0.3333)DS(0.3333)AEQGDPAGEGK;
ETESAPGSPR	ET[79.9663]ESAPGSPR	K	A	514	523	10	2	2T(79.9663)	sp|Q6PKG0|LARP1_HUMAN	Q6PKG0	LARP1_HUMAN	LARP1	La-related protein 1		sp|Q6PKG0-3|LARP1_HUMAN	1	0	MS/MS	STY:79.9663@ET(0.4872)ES(0.4872)APGS(0.0256)PR;
ETESEAEDNLDDLEK	ET[79.9663]ESEAEDNLDDLEK	K	H	871	885	15	2	2T(79.9663)	sp|Q8IYB3|SRRM1_HUMAN	Q8IYB3	SRRM1_HUMAN	SRRM1	Serine/arginine repetitive matrix protein 1		sp|Q8IYB3-2|SRRM1_HUMAN	1	0	MS/MS	STY:79.9663@ET(0.8091)ES(0.1909)EAEDNLDDLEK;
ETNLDSLPLVDTHSK	ET[79.9663]NLDSLPLVDTHSK	R	R	425	439	15	2	2T(79.9663)	sp|P08670|VIME_HUMAN	P08670	VIME_HUMAN	VIM	Vimentin			1	2.10144e+06	MS/MS	STY:79.9663@ET(0.9204)NLDS(0.0333)LPLVDT(0.0215)HS(0.0249)K;
ETPHSPGVEDAPIAK	ET[79.9663]PHSPGVEDAPIAK	R	V	326	340	15	2,3	2T(79.9663)	sp|Q9UHB6-2|LIMA1_HUMAN	Q9UHB6-2	LIMA1_HUMAN	LIMA1	Isoform Alpha of LIM domain and actin-binding protein 1		sp|Q9UHB6-3|LIMA1_HUMAN, sp|Q9UHB6-4|LIMA1_HUMAN, sp|Q9UHB6-5|LIMA1_HUMAN, sp|Q9UHB6|LIMA1_HUMAN	5	2.3282406E7	MS/MS	STY:79.9663@ET(0.5000)PHS(0.5000)PGVEDAPIAK;
ETQSPEQVK	ET[79.9663]QSPEQVK	K	S	491	499	9	2	2T(79.9663)	sp|Q9NYF8-2|BCLF1_HUMAN	Q9NYF8-2	BCLF1_HUMAN	BCLAF1	Isoform 2 of Bcl-2-associated transcription factor 1		sp|Q9NYF8-3|BCLF1_HUMAN, sp|Q9NYF8|BCLF1_HUMAN	1	1.53872e+06	MS/MS	STY:79.9663@ET(0.5000)QS(0.5000)PEQVK;
EVAATEEDVTRLPSPTSPFSSLSQDQAATSK	EVAATEEDVTRLPSPTSPFSS[79.9663]LSQDQAATSK	K	A	975	1005	31	3	21S(79.9663)	sp|Q8WWI1-2|LMO7_HUMAN	Q8WWI1-2	LMO7_HUMAN	LMO7	Isoform 2 of LIM domain only protein 7		sp|Q8WWI1-3|LMO7_HUMAN, sp|Q8WWI1-4|LMO7_HUMAN, sp|Q8WWI1-5|LMO7_HUMAN, sp|Q8WWI1|LMO7_HUMAN	1	1.4029785E7	MS/MS	STY:79.9663@EVAAT(0.0081)EEDVT(0.0090)RLPS(0.0090)PT(0.0090)S(0.0090)PFS(0.0399)S(0.4491)LS(0.4491)QDQAAT(0.0088)S(0.0088)K;
EVAATEEDVTRLPSPTSPFSSLSQDQAATSK	EVAATEEDVTRLPS[79.9663]PTSPFSSLSQDQAATSK	K	A	975	1005	31	3	14S(79.9663)	sp|Q8WWI1-2|LMO7_HUMAN	Q8WWI1-2	LMO7_HUMAN	LMO7	Isoform 2 of LIM domain only protein 7		sp|Q8WWI1-3|LMO7_HUMAN, sp|Q8WWI1-4|LMO7_HUMAN, sp|Q8WWI1-5|LMO7_HUMAN, sp|Q8WWI1|LMO7_HUMAN	2	1.8783744E7	MS/MS	STY:79.9663@EVAAT(0.0078)EEDVT(0.0191)RLPS(0.2945)PT(0.2945)S(0.2945)PFS(0.0179)S(0.0179)LS(0.0179)QDQAAT(0.0179)S(0.0179)K;
EVAATEEDVTRLPSPTSPFSSLSQDQAATSK	EVAATEEDVTRLPS[79.9663]PT[79.9663]SPFSSLSQDQAATSK	K	A	975	1005	31	3	14S(79.9663),16T(79.9663)	sp|Q8WWI1-2|LMO7_HUMAN	Q8WWI1-2	LMO7_HUMAN	LMO7	Isoform 2 of LIM domain only protein 7		sp|Q8WWI1-3|LMO7_HUMAN, sp|Q8WWI1-4|LMO7_HUMAN, sp|Q8WWI1-5|LMO7_HUMAN, sp|Q8WWI1|LMO7_HUMAN	1	5016280	MS/MS	STY:79.9663@EVAAT(0.0400)EEDVT(0.0584)RLPS(0.2377)PT(0.2377)S(0.2377)PFS(0.2377)S(0.2377)LS(0.2377)QDQAAT(0.2377)S(0.2377)K;
EVDGLLTSEPMGSPVSSK	EVDGLLTSEPMGSPVS[79.9663]SK	K	T	582	599	18	2	16S(79.9663)	sp|Q8WWM7-2|ATX2L_HUMAN	Q8WWM7-2	ATX2L_HUMAN	ATXN2L	Isoform 2 of Ataxin-2-like protein		sp|Q8WWM7-3|ATX2L_HUMAN, sp|Q8WWM7-4|ATX2L_HUMAN, sp|Q8WWM7-5|ATX2L_HUMAN, sp|Q8WWM7-6|ATX2L_HUMAN, sp|Q8WWM7-8|ATX2L_HUMAN, sp|Q8WWM7-9|ATX2L_HUMAN, sp|Q8WWM7|ATX2L_HUMAN	1	7114269	MS/MS	STY:79.9663@EVDGLLT(0.0220)S(0.0220)EPMGS(0.0768)PVS(0.4396)S(0.4396)K;
EVDGLLTSEPMGSPVSSK	EVDGLLTSEPMGS[79.9663]PVSSK	K	T	582	599	18	2	13S(79.9663)	sp|Q8WWM7-2|ATX2L_HUMAN	Q8WWM7-2	ATX2L_HUMAN	ATXN2L	Isoform 2 of Ataxin-2-like protein		sp|Q8WWM7-3|ATX2L_HUMAN, sp|Q8WWM7-4|ATX2L_HUMAN, sp|Q8WWM7-5|ATX2L_HUMAN, sp|Q8WWM7-6|ATX2L_HUMAN, sp|Q8WWM7-8|ATX2L_HUMAN, sp|Q8WWM7-9|ATX2L_HUMAN, sp|Q8WWM7|ATX2L_HUMAN	2	7114269	MS/MS	STY:79.9663@EVDGLLT(0.0158)S(0.0158)EPMGS(0.9363)PVS(0.0160)S(0.0160)K;
EVDPSTGELQSLQMPESEGPSSLDPSQEGPTGLK	EVDPSTGELQSLQMPESEGPSSLDPSQEGPT[79.9663]GLK	K	E	345	378	34	3	31T(79.9663)	sp|Q13501|SQSTM_HUMAN	Q13501	SQSTM_HUMAN	SQSTM1	Sequestosome-1		sp|Q13501-2|SQSTM_HUMAN	1	3.3814008E7	MS/MS	STY:79.9663@EVDPS(0.0090)T(0.0090)GELQS(0.0139)LQMPES(0.1369)EGPS(0.0686)S(0.0686)LDPS(0.0686)QEGPT(0.6254)GLK;
EVDPSTGELQSLQMPESEGPSSLDPSQEGPTGLK	EVDPSTGELQSLQMPESEGPSS[79.9663]LDPSQEGPTGLK	K	E	345	378	34	3	22S(79.9663)	sp|Q13501|SQSTM_HUMAN	Q13501	SQSTM_HUMAN	SQSTM1	Sequestosome-1		sp|Q13501-2|SQSTM_HUMAN	1	3.3814008E7	MS/MS	STY:79.9663@EVDPS(0.1793)T(0.1793)GELQS(0.0358)LQMPES(0.0358)EGPS(0.0358)S(0.2639)LDPS(0.2639)QEGPT(0.0063)GLK;
EVDPSTGELQSLQMPESEGPSSLDPSQEGPTGLK	EVDPSTGELQSLQMPESEGPS[79.9663]SLDPSQEGPTGLK	K	E	345	378	34	3	21S(79.9663)	sp|Q13501|SQSTM_HUMAN	Q13501	SQSTM_HUMAN	SQSTM1	Sequestosome-1		sp|Q13501-2|SQSTM_HUMAN	1	1.7186868E7	MS/MS	STY:79.9663@EVDPS(0.0162)T(0.0162)GELQS(0.0325)LQMPES(0.2867)EGPS(0.3182)S(0.3182)LDPS(0.0049)QEGPT(0.0071)GLK;
EVDPSTGELQSLQMPESEGPSSLDPSQEGPTGLK	EVDPSTGELQSLQMPES[79.9663]EGPSSLDPSQEGPTGLK	K	E	345	378	34	3	17S(79.9663)	sp|Q13501|SQSTM_HUMAN	Q13501	SQSTM_HUMAN	SQSTM1	Sequestosome-1		sp|Q13501-2|SQSTM_HUMAN	1	1.7186868E7	MS/MS	STY:79.9663@EVDPS(0.0665)T(0.0665)GELQS(0.0720)LQMPES(0.6982)EGPS(0.0080)S(0.0080)LDPS(0.0080)QEGPT(0.0729)GLK;
EVDPSTGELQSLQMPESEGPSSLDPSQEGPTGLK	EVDPSTGELQSLQM[15.9949]PESEGPSSLDPSQEGPT[79.9663]GLK	K	E	345	378	34	3	14M(15.9949),31T(79.9663)	sp|Q13501|SQSTM_HUMAN	Q13501	SQSTM_HUMAN	SQSTM1	Sequestosome-1		sp|Q13501-2|SQSTM_HUMAN	1	6.58778e+06	MS/MS	STY:79.9663@EVDPS(0.0482)T(0.0482)GELQS(0.0115)LQMPES(0.0139)EGPS(0.0207)S(0.0207)LDPS(0.0363)QEGPT(0.8005)GLK;M:15.9949@EVDPSTGELQSLQM(1.0000)PESEGPSSLDPSQEGPTGLK;
EVDPSTGELQSLQMPESEGPSSLDPSQEGPTGLK	EVDPSTGELQSLQM[15.9949]PESEGPS[79.9663]SLDPSQEGPTGLK	K	E	345	378	34	3	14M(15.9949),21S(79.9663)	sp|Q13501|SQSTM_HUMAN	Q13501	SQSTM_HUMAN	SQSTM1	Sequestosome-1		sp|Q13501-2|SQSTM_HUMAN	1	0	MS/MS	STY:79.9663@EVDPS(0.1031)T(0.1031)GELQS(0.1031)LQMPES(0.0157)EGPS(0.1688)S(0.1688)LDPS(0.1688)QEGPT(0.1688)GLK;M:15.9949@EVDPSTGELQSLQM(1.0000)PESEGPSSLDPSQEGPTGLK;
EVDPSTGELQSLQMPESEGPSSLDPSQEGPTGLK	EVDPS[79.9663]TGELQSLQMPESEGPSSLDPSQEGPTGLK	K	E	345	378	34	3	5S(79.9663)	sp|Q13501|SQSTM_HUMAN	Q13501	SQSTM_HUMAN	SQSTM1	Sequestosome-1		sp|Q13501-2|SQSTM_HUMAN	1	0	MS/MS	STY:79.9663@EVDPS(0.1625)T(0.1625)GELQS(0.1625)LQMPES(0.1625)EGPS(0.1625)S(0.1625)LDPS(0.0124)QEGPT(0.0124)GLK;
EVEDKESEGEEEDEDEDLSK	EVEDKESEGEEEDEDEDLS[79.9663]K	K	Y	147	166	20	3	19S(79.9663)	sp|O95218-2|ZRAB2_HUMAN	O95218-2	ZRAB2_HUMAN	ZRANB2	Isoform 2 of Zinc finger Ran-binding domain-containing protein 2		sp|O95218|ZRAB2_HUMAN	1	3.8439584E7	MS/MS	STY:79.9663@EVEDKES(0.2459)EGEEEDEDEDLS(0.7541)K;
EVEDKESEGEEEDEDEDLSK	EVEDKES[79.9663]EGEEEDEDEDLSK	K	Y	147	166	20	2,3	7S(79.9663)	sp|O95218-2|ZRAB2_HUMAN	O95218-2	ZRAB2_HUMAN	ZRANB2	Isoform 2 of Zinc finger Ran-binding domain-containing protein 2		sp|O95218|ZRAB2_HUMAN	10	9.2610384E7	MS/MS	STY:79.9663@EVEDKES(0.9406)EGEEEDEDEDLS(0.0594)K;
EVEEDSEDEEMSEDEEDDSSGEEVVIPQK	EVEEDSEDEEMSEDEEDDSS[79.9663]GEEVVIPQK	K	K	23	51	29	3	20S(79.9663)	sp|P19338|NUCL_HUMAN	P19338	NUCL_HUMAN	NCL	Nucleolin			1	2.52299e+06	MS/MS	STY:79.9663@EVEEDS(0.1754)EDEEMS(0.1754)EDEEDDS(0.1754)S(0.4739)GEEVVIPQK;
EVEEDSEDEEMSEDEEDDSSGEEVVIPQKK	EVEEDSEDEEMSEDEEDDS[79.9663]S[79.9663]GEEVVIPQKK	K	G	23	52	30	3	19S(79.9663),20S(79.9663)	sp|P19338|NUCL_HUMAN	P19338	NUCL_HUMAN	NCL	Nucleolin			1	7317235	MS/MS	STY:79.9663@EVEEDS(0.2490)EDEEMS(0.2490)EDEEDDS(0.7510)S(0.7510)GEEVVIPQKK;
EVEEDSEDEEMSEDEEDDSSGEEVVIPQK	EVEEDSEDEEMS[79.9663]EDEEDDS[79.9663]S[79.9663]GEEVVIPQK	K	K	23	51	29	3	12S(79.9663),19S(79.9663),20S(79.9663)	sp|P19338|NUCL_HUMAN	P19338	NUCL_HUMAN	NCL	Nucleolin			1	4.1659376E7	MS/MS	STY:79.9663@EVEEDS(0.7376)EDEEMS(0.7450)EDEEDDS(0.7587)S(0.7587)GEEVVIPQK;
EVEEDSEDEEMSEDEEDDSSGEEVVIPQK	EVEEDS[79.9663]EDEEMSEDEEDDSSGEEVVIPQK	K	K	23	51	29	3	6S(79.9663)	sp|P19338|NUCL_HUMAN	P19338	NUCL_HUMAN	NCL	Nucleolin			2	2.52299e+06	MS/MS	STY:79.9663@EVEEDS(0.2500)EDEEMS(0.2500)EDEEDDS(0.2500)S(0.2500)GEEVVIPQK;
EVEEDSEDEEMSEDEEDDSSGEEVVIPQKK	EVEEDS[79.9663]EDEEMSEDEEDDSSGEEVVIPQKK	K	G	23	52	30	3	6S(79.9663)	sp|P19338|NUCL_HUMAN	P19338	NUCL_HUMAN	NCL	Nucleolin			1	2135853	MS/MS	STY:79.9663@EVEEDS(0.2500)EDEEMS(0.2500)EDEEDDS(0.2500)S(0.2500)GEEVVIPQKK;
EVEEDSEDEEMSEDEEDDSSGEEVVIPQK	EVEEDS[79.9663]EDEEMSEDEEDDS[79.9663]S[79.9663]GEEVVIPQK	K	K	23	51	29	3	19S(79.9663),20S(79.9663),6S(79.9663)	sp|P19338|NUCL_HUMAN	P19338	NUCL_HUMAN	NCL	Nucleolin			1	4.1659376E7	MS/MS	STY:79.9663@EVEEDS(0.9158)EDEEMS(0.2529)EDEEDDS(0.9156)S(0.9156)GEEVVIPQK;
EVEEDSEDEEMSEDEEDDSSGEEVVIPQKK	EVEEDS[79.9663]EDEEMSEDEEDDS[79.9663]S[79.9663]GEEVVIPQKK	K	G	23	52	30	3	19S(79.9663),20S(79.9663),6S(79.9663)	sp|P19338|NUCL_HUMAN	P19338	NUCL_HUMAN	NCL	Nucleolin			1	0	MS/MS	STY:79.9663@EVEEDS(0.8245)EDEEMS(0.5248)EDEEDDS(0.8253)S(0.8253)GEEVVIPQKK;
EVEEDSEDEEMSEDEEDDSSGEEVVIPQK	EVEEDS[79.9663]EDEEMS[79.9663]EDEEDDSSGEEVVIPQK	K	K	23	51	29	3	12S(79.9663),6S(79.9663)	sp|P19338|NUCL_HUMAN	P19338	NUCL_HUMAN	NCL	Nucleolin			4	1.0698633E7	MS/MS	STY:79.9663@EVEEDS(0.8236)EDEEMS(0.8224)EDEEDDS(0.1770)S(0.1770)GEEVVIPQK;
EVEEDSEDEEMSEDEEDDSSGEEVVIPQKK	EVEEDS[79.9663]EDEEMS[79.9663]EDEEDDSSGEEVVIPQKK	K	G	23	52	30	3	12S(79.9663),6S(79.9663)	sp|P19338|NUCL_HUMAN	P19338	NUCL_HUMAN	NCL	Nucleolin			1	0	MS/MS	STY:79.9663@EVEEDS(0.5000)EDEEMS(0.5000)EDEEDDS(0.5000)S(0.5000)GEEVVIPQKK;
EVEEDSEDEEMSEDEEDDSSGEEVVIPQK	EVEEDS[79.9663]EDEEMS[79.9663]EDEEDDS[79.9663]SGEEVVIPQK	K	K	23	51	29	3	12S(79.9663),19S(79.9663),6S(79.9663)	sp|P19338|NUCL_HUMAN	P19338	NUCL_HUMAN	NCL	Nucleolin			7	5.3621968E7	MS/MS	STY:79.9663@EVEEDS(0.7598)EDEEMS(0.7598)EDEEDDS(0.7402)S(0.7402)GEEVVIPQK;
EVEEDSEDEEMSEDEEDDSSGEEVVIPQKK	EVEEDS[79.9663]EDEEMS[79.9663]EDEEDDS[79.9663]SGEEVVIPQKK	K	G	23	52	30	3,4	12S(79.9663),19S(79.9663),6S(79.9663)	sp|P19338|NUCL_HUMAN	P19338	NUCL_HUMAN	NCL	Nucleolin			7	4.0414856E7	MS/MS	STY:79.9663@EVEEDS(0.9247)EDEEMS(0.9247)EDEEDDS(0.9245)S(0.2261)GEEVVIPQKK;
EVSSLEGSPPPCLGQEEAVCTK	EVSSLEGSPPPC[57.0215]LGQEEAVC[57.0215]T[79.9663]K	K	I	1290	1311	22	3	12C(57.0215),20C(57.0215),21T(79.9663)	sp|Q02952-2|AKA12_HUMAN	Q02952-2	AKA12_HUMAN	AKAP12	Isoform 2 of A-kinase anchor protein 12		sp|Q02952-3|AKA12_HUMAN, sp|Q02952|AKA12_HUMAN	1	1.25549e+06	MS/MS	STY:79.9663@EVS(0.0422)S(0.0422)LEGS(0.0422)PPPCLGQEEAVCT(0.8734)K;
EVSDDEAEEK	EVS[79.9663]DDEAEEK	K	E	351	360	10	2	3S(79.9663)	sp|P07900-2|HS90A_HUMAN	P07900-2	HS90A_HUMAN	HSP90AA1	Isoform 2 of Heat shock protein HSP 90-alpha		sp|P07900|HS90A_HUMAN	7	7.1352864E7	MS/MS	STY:79.9663@EVS(1.0000)DDEAEEK;
EVSDDEAEEKEDKEEEK	EVS[79.9663]DDEAEEKEDKEEEK	K	E	351	367	17	2,3	3S(79.9663)	sp|P07900-2|HS90A_HUMAN	P07900-2	HS90A_HUMAN	HSP90AA1	Isoform 2 of Heat shock protein HSP 90-alpha		sp|P07900|HS90A_HUMAN	6	3.05898816E8	MS/MS	STY:79.9663@EVS(1.0000)DDEAEEKEDKEEEK;
EVSSLEGSPPPCLGQEEAVCTK	EVS[79.9663]SLEGSPPPC[57.0215]LGQEEAVC[57.0215]TK	K	I	1290	1311	22	3	12C(57.0215),20C(57.0215),3S(79.9663)	sp|Q02952-2|AKA12_HUMAN	Q02952-2	AKA12_HUMAN	AKAP12	Isoform 2 of A-kinase anchor protein 12		sp|Q02952-3|AKA12_HUMAN, sp|Q02952|AKA12_HUMAN	1	1.25549e+06	MS/MS	STY:79.9663@EVS(0.2500)S(0.2500)LEGS(0.2500)PPPCLGQEEAVCT(0.2500)K;
EVVKPVPITSPAVSK	EVVKPVPIT[79.9663]SPAVSK	K	V	102	116	15	2	9T(79.9663)	sp|Q96HC4|PDLI5_HUMAN	Q96HC4	PDLI5_HUMAN	PDLIM5	PDZ and LIM domain protein 5			1	0	MS/MS	STY:79.9663@EVVKPVPIT(0.3333)S(0.3333)PAVS(0.3333)K;
EVYELLDSPGK	EVYELLDS[79.9663]PGK	K	V	20	30	11	2	8S(79.9663)	sp|P22234-2|PUR6_HUMAN	P22234-2	PUR6_HUMAN	PAICS	Isoform 2 of Bifunctional phosphoribosylaminoimidazole carboxylase/phosphoribosylaminoimidazole succinocarboxamide synthetase		sp|P22234|PUR6_HUMAN	1	0	MS/MS	STY:79.9663@EVY(0.0844)ELLDS(0.9156)PGK;
EVYELLDSPGK	EVY[79.9663]ELLDSPGK	K	V	20	30	11	2	3Y(79.9663)	sp|P22234-2|PUR6_HUMAN	P22234-2	PUR6_HUMAN	PAICS	Isoform 2 of Bifunctional phosphoribosylaminoimidazole carboxylase/phosphoribosylaminoimidazole succinocarboxamide synthetase		sp|P22234|PUR6_HUMAN	1	2198724	MS/MS	STY:79.9663@EVY(0.5000)ELLDS(0.5000)PGK;
EWNGVVSESDSPVK	EWNGVVSESDS[79.9663]PVK	K	R	41	54	14	2	11S(79.9663)	sp|P18858-2|DNLI1_HUMAN	P18858-2	DNLI1_HUMAN	LIG1	Isoform 2 of DNA ligase 1		sp|P18858-3|DNLI1_HUMAN, sp|P18858|DNLI1_HUMAN	1	1.16909e+06	MS/MS	STY:79.9663@EWNGVVS(0.2050)ES(0.2050)DS(0.5900)PVK;
EYFDDSTEER	EYFDDS[79.9663]TEER	K	F	259	268	10	2	6S(79.9663)	sp|Q8NEF9|SRFB1_HUMAN	Q8NEF9	SRFB1_HUMAN	SRFBP1	Serum response factor-binding protein 1			1	0	MS/MS	STY:79.9663@EY(0.0323)FDDS(0.4839)T(0.4839)EER;
EYIPGQPPLSQSSDSSPTRNSEPAGLETPEAK	EYIPGQPPLSQSSDSSPT[79.9663]RNSEPAGLETPEAK	K	V	871	902	32	3	18T(79.9663)	sp|P07814|SYEP_HUMAN	P07814	SYEP_HUMAN	EPRS1	Bifunctional glutamate/proline--tRNA ligase			1	2.4794468E7	MS/MS	STY:79.9663@EY(0.0070)IPGQPPLS(0.0094)QS(0.0111)S(0.0111)DS(0.0111)S(0.0111)PT(0.3130)RNS(0.3130)EPAGLET(0.3130)PEAK;
EYIPGQPPLSQSSDSSPTR	EYIPGQPPLS[79.9663]QSSDSSPTR	K	N	871	889	19	2	10S(79.9663)	sp|P07814|SYEP_HUMAN	P07814	SYEP_HUMAN	EPRS1	Bifunctional glutamate/proline--tRNA ligase			2	1.7379852E7	MS/MS	STY:79.9663@EY(0.0066)IPGQPPLS(0.1656)QS(0.1656)S(0.1656)DS(0.1656)S(0.1656)PT(0.1656)R;
EYIPGQPPLSQSSDSSPTRNSEPAGLETPEAK	EYIPGQPPLS[79.9663]QSSDSSPTRNSEPAGLETPEAK	K	V	871	902	32	3	10S(79.9663)	sp|P07814|SYEP_HUMAN	P07814	SYEP_HUMAN	EPRS1	Bifunctional glutamate/proline--tRNA ligase			6	5.4766748E7	MS/MS	STY:79.9663@EY(0.0067)IPGQPPLS(0.4256)QS(0.4256)S(0.0171)DS(0.0171)S(0.0171)PT(0.0171)RNS(0.0171)EPAGLET(0.0568)PEAK;
EYVSNDAAQSDDEEK	EYVS[79.9663]NDAAQSDDEEK	K	L	394	408	15	2	4S(79.9663)	sp|Q5JSH3-2|WDR44_HUMAN	Q5JSH3-2	WDR44_HUMAN	WDR44	Isoform 2 of WD repeat-containing protein 44		sp|Q5JSH3-4|WDR44_HUMAN, sp|Q5JSH3|WDR44_HUMAN	1	0	MS/MS	STY:79.9663@EY(0.0417)VS(0.8084)NDAAQS(0.1500)DDEEK;
EYIPGQPPLSQSSDSSPTR	EY[79.9663]IPGQPPLSQSSDSSPTR	K	N	871	889	19	2	2Y(79.9663)	sp|P07814|SYEP_HUMAN	P07814	SYEP_HUMAN	EPRS1	Bifunctional glutamate/proline--tRNA ligase			1	1.7379852E7	MS/MS	STY:79.9663@EY(0.6743)IPGQPPLS(0.0626)QS(0.0626)S(0.0626)DS(0.0626)S(0.0626)PT(0.0125)R;
EYIPGQPPLSQSSDSSPTRNSEPAGLETPEAK	EY[79.9663]IPGQPPLSQSSDSSPTRNSEPAGLETPEAK	K	V	871	902	32	3	2Y(79.9663)	sp|P07814|SYEP_HUMAN	P07814	SYEP_HUMAN	EPRS1	Bifunctional glutamate/proline--tRNA ligase			1	2.982024E7	MS/MS	STY:79.9663@EY(0.1505)IPGQPPLS(0.1505)QS(0.1505)S(0.1505)DS(0.1505)S(0.1505)PT(0.0564)RNS(0.0066)EPAGLET(0.0337)PEAK;
FASDDEHDEHDENGATGPVK	FASDDEHDEHDENGAT[79.9663]GPVK	K	R	364	383	20	2,3	16T(79.9663)	sp|P05455|LA_HUMAN	P05455	LA_HUMAN	SSB	Lupus La protein			2	0	MS/MS	STY:79.9663@FAS(0.0715)DDEHDEHDENGAT(0.9285)GPVK;
FASDDEHDEHDENGATGPVK	FAS[79.9663]DDEHDEHDENGATGPVK	K	R	364	383	20	3,4	3S(79.9663)	sp|P05455|LA_HUMAN	P05455	LA_HUMAN	SSB	Lupus La protein			5	6.1155784E7	MS/MS	STY:79.9663@FAS(0.9403)DDEHDEHDENGAT(0.0597)GPVK;
FDIYDPFHPTDEAYSPPPAPEQK	FDIYDPFHPTDEAY[79.9663]SPPPAPEQK	R	Y	225	247	23	3	14Y(79.9663)	sp|Q9H7N4|SFR19_HUMAN	Q9H7N4	SFR19_HUMAN	SCAF1	Splicing factor, arginine/serine-rich 19			1	0	MS/MS	STY:79.9663@FDIY(0.0696)DPFHPT(0.0696)DEAY(0.4304)S(0.4304)PPPAPEQK;
FEDEGAGFEESSETGDYEEK	FEDEGAGFEESSETGDY[79.9663]EEK	K	A	926	945	20	2	17Y(79.9663)	sp|P46821|MAP1B_HUMAN	P46821	MAP1B_HUMAN	MAP1B	Microtubule-associated protein 1B			1	1.2497916E7	MS/MS	STY:79.9663@FEDEGAGFEES(0.0375)S(0.0375)ET(0.0375)GDY(0.8875)EEK;
FEDEGAGFEESSETGDYEEK	FEDEGAGFEES[79.9663]SETGDYEEK	K	A	926	945	20	2	11S(79.9663)	sp|P46821|MAP1B_HUMAN	P46821	MAP1B_HUMAN	MAP1B	Microtubule-associated protein 1B			1	1.2497916E7	MS/MS	STY:79.9663@FEDEGAGFEES(0.4861)S(0.4861)ET(0.0139)GDY(0.0139)EEK;
FEEESKEPVADEEEEDSDDDVEPITEFR	FEEESKEPVADEEEEDSDDDVEPIT[79.9663]EFR	K	F	86	113	28	3	25T(79.9663)	sp|P54105|ICLN_HUMAN	P54105	ICLN_HUMAN	CLNS1A	Methylosome subunit pICln			4	2.01883856E8	MS/MS	STY:79.9663@FEEES(0.0377)KEPVADEEEEDS(0.0528)DDDVEPIT(0.9095)EFR;
FEEESKEPVADEEEEDSDDDVEPITEFR	FEEESKEPVADEEEEDS[79.9663]DDDVEPITEFR	K	F	86	113	28	3	17S(79.9663)	sp|P54105|ICLN_HUMAN	P54105	ICLN_HUMAN	CLNS1A	Methylosome subunit pICln			10	2.08808256E8	MS/MS	STY:79.9663@FEEES(0.0309)KEPVADEEEEDS(0.9363)DDDVEPIT(0.0327)EFR;
FEEESKEPVADEEEEDSDDDVEPITEFR	FEEES[79.9663]KEPVADEEEEDSDDDVEPITEFR	K	F	86	113	28	3	5S(79.9663)	sp|P54105|ICLN_HUMAN	P54105	ICLN_HUMAN	CLNS1A	Methylosome subunit pICln			1	1.36445152E8	MS/MS	STY:79.9663@FEEES(0.4091)KEPVADEEEEDS(0.2954)DDDVEPIT(0.2954)EFR;
FGESEEVEMEVESDEEDDKQEK	FGESEEVEMEVES[79.9663]DEEDDKQEK	K	A	252	273	22	3	13S(79.9663)	sp|Q15459-2|SF3A1_HUMAN	Q15459-2	SF3A1_HUMAN	SF3A1	Isoform 2 of Splicing factor 3A subunit 1		sp|Q15459|SF3A1_HUMAN	2	2.2679288E7	MS/MS	STY:79.9663@FGES(0.1112)EEVEMEVES(0.8888)DEEDDKQEK;
FGESEEVEMEVESDEEDDKQEK	FGESEEVEM[15.9949]EVES[79.9663]DEEDDKQEK	K	A	252	273	22	3	13S(79.9663),9M(15.9949)	sp|Q15459-2|SF3A1_HUMAN	Q15459-2	SF3A1_HUMAN	SF3A1	Isoform 2 of Splicing factor 3A subunit 1		sp|Q15459|SF3A1_HUMAN	3	1.2819902E7	MS/MS	STY:79.9663@FGES(0.0796)EEVEMEVES(0.9204)DEEDDKQEK;M:15.9949@FGESEEVEM(1.0000)EVESDEEDDKQEK;
FGESEEVEMEVESDEEDDKQEK	FGES[79.9663]EEVEMEVESDEEDDKQEK	K	A	252	273	22	3	4S(79.9663)	sp|Q15459-2|SF3A1_HUMAN	Q15459-2	SF3A1_HUMAN	SF3A1	Isoform 2 of Splicing factor 3A subunit 1		sp|Q15459|SF3A1_HUMAN	3	2.2679288E7	MS/MS	STY:79.9663@FGES(0.8143)EEVEMEVES(0.1857)DEEDDKQEK;
FGIHVYQFPECDSDEDEDFK	FGIHVY[79.9663]QFPEC[57.0215]DSDEDEDFK	K	Q	222	241	20	3	11C(57.0215),6Y(79.9663)	sp|Q99719-2|SEPT5_HUMAN	Q99719-2	SEPT5_HUMAN	SEPTIN5	Isoform 2 of Septin-5		sp|Q99719|SEPT5_HUMAN	1	1.11227e+06	MS/MS	STY:79.9663@FGIHVY(0.5000)QFPECDS(0.5000)DEDEDFK;
FHSPSTTWSPNK	FHS[79.9663]PSTTWSPNK	R	D	479	490	12	2	3S(79.9663)	sp|Q99590-2|SCAFB_HUMAN	Q99590-2	SCAFB_HUMAN	SCAF11	Isoform 2 of Protein SCAF11		sp|Q99590|SCAFB_HUMAN	1	0	MS/MS	STY:79.9663@FHS(0.8734)PS(0.0317)T(0.0317)T(0.0317)WS(0.0317)PNK;
FIQELSGSSPK	FIQELS[79.9663]GSSPK	R	R	116	126	11	2	6S(79.9663)	sp|Q01664|TFAP4_HUMAN	Q01664	TFAP4_HUMAN	TFAP4	Transcription factor AP-4			1	2425918	MS/MS	STY:79.9663@FIQELS(0.3333)GS(0.3333)S(0.3333)PK;
FLMECRNSPVTK	FLMEC[57.0215]RNS[79.9663]PVTK	K	T	58	69	12	2	5C(57.0215),8S(79.9663)	sp|Q13541|4EBP1_HUMAN	Q13541	4EBP1_HUMAN	EIF4EBP1	Eukaryotic translation initiation factor 4E-binding protein 1			3	2.366604E7	MS/MS	STY:79.9663@FLMECRNS(0.9339)PVT(0.0661)K;
FNDSEGDDTEETEDYR	FNDS[79.9663]EGDDTEETEDYR	K	Q	392	407	16	2	4S(79.9663)	sp|Q9NYF8-2|BCLF1_HUMAN	Q9NYF8-2	BCLF1_HUMAN	BCLAF1	Isoform 2 of Bcl-2-associated transcription factor 1		sp|Q9NYF8-3|BCLF1_HUMAN, sp|Q9NYF8|BCLF1_HUMAN	7	3.2617656E7	MS/MS	STY:79.9663@FNDS(0.9376)EGDDT(0.0213)EET(0.0206)EDY(0.0206)R;
FNEEHIPDSPFVVPVASPSGDAR	FNEEHIPDSPFVVPVAS[79.9663]PSGDAR	K	R	2303	2325	23	3	17S(79.9663)	sp|P21333-2|FLNA_HUMAN	P21333-2	FLNA_HUMAN	FLNA	Isoform 2 of Filamin-A		sp|P21333|FLNA_HUMAN	1	2978335	MS/MS	STY:79.9663@FNEEHIPDS(0.0275)PFVVPVAS(0.4862)PS(0.4862)GDAR;
FPDRLAEDEGDSEPEAVGQSR	FPDRLAEDEGDS[79.9663]EPEAVGQSR	K	G	1453	1473	21	3	12S(79.9663)	sp|Q9UIG0-2|BAZ1B_HUMAN	Q9UIG0-2	BAZ1B_HUMAN	BAZ1B	Isoform 2 of Tyrosine-protein kinase BAZ1B		sp|Q9UIG0|BAZ1B_HUMAN	2	1.83154e+06	MS/MS	STY:79.9663@FPDRLAEDEGDS(0.9294)EPEAVGQS(0.0706)R;
FQSEEQQQTEDELQDK	FQSEEQQQT[79.9663]EDELQDK	K	I	48	63	16	2,3	9T(79.9663)	sp|P02666|CASB_BOVIN	P02666	CASB_BOVIN	CSN2	Beta-casein			38	2.09501645E9	MS/MS	STY:79.9663@FQS(0.0603)EEQQQT(0.9397)EDELQDK;
FQSEEQQQTEDELQDK	FQS[79.9663]EEQQQTEDELQDK	K	I	48	63	16	2,3	3S(79.9663)	sp|P02666|CASB_BOVIN	P02666	CASB_BOVIN	CSN2	Beta-casein			79	2.1090615E9	MS/MS	STY:79.9663@FQS(0.9416)EEQQQT(0.0584)EDELQDK;
FSEMMNNMGGDEDVDLPEVDGADDDSQDSDDEK	FSEMMNNMGGDEDVDLPEVDGADDDSQDS[79.9663]DDEK	R	M	123	155	33	3	29S(79.9663)	sp|Q15185|TEBP_HUMAN	Q15185	TEBP_HUMAN	PTGES3	Prostaglandin E synthase 3		sp|Q15185-2|TEBP_HUMAN	1	0	MS/MS	STY:79.9663@FS(0.0437)EMMNNMGGDEDVDLPEVDGADDDS(0.0585)QDS(0.8978)DDEK;
FSGEEGEIEDDESGTENREEK	FSGEEGEIEDDES[79.9663]GTENREEK	K	D	927	947	21	2,3	13S(79.9663)	sp|Q9Y2W1|TR150_HUMAN	Q9Y2W1	TR150_HUMAN	THRAP3	Thyroid hormone receptor-associated protein 3			2	2.0042676E7	MS/MS	STY:79.9663@FS(0.0330)GEEGEIEDDES(0.9293)GT(0.0377)ENREEK;
FSEMMNNMGGDEDVDLPEVDGADDDSQDSDDEK	FS[79.9663]EMMNNMGGDEDVDLPEVDGADDDSQDS[79.9663]DDEK	R	M	123	155	33	3	29S(79.9663),2S(79.9663)	sp|Q15185|TEBP_HUMAN	Q15185	TEBP_HUMAN	PTGES3	Prostaglandin E synthase 3		sp|Q15185-2|TEBP_HUMAN	1	3.7300552E7	MS/MS	STY:79.9663@FS(0.8939)EMMNNMGGDEDVDLPEVDGADDDS(0.2038)QDS(0.9023)DDEK;
FSEMMNNMGGDEDVDLPEVDGADDDSQDSDDEK	FS[79.9663]EMMNNM[15.9949]GGDEDVDLPEVDGADDDS[79.9663]QDSDDEK	R	M	123	155	33	3	26S(79.9663),2S(79.9663),8M(15.9949)	sp|Q15185|TEBP_HUMAN	Q15185	TEBP_HUMAN	PTGES3	Prostaglandin E synthase 3		sp|Q15185-2|TEBP_HUMAN	1	2.517477E7	MS/MS	STY:79.9663@FS(0.6839)EMMNNMGGDEDVDLPEVDGADDDS(0.6580)QDS(0.6580)DDEK;M:15.9949@FSEM(0.1427)M(0.1427)NNM(0.7146)GGDEDVDLPEVDGADDDSQDSDDEK;
FTSSQTQSPTPPKPPSPSFELGLSSFPPLPGAAGNLK	FTSSQTQSPTPPKPPSPSFELGLS[79.9663]SFPPLPGAAGNLK	K	T	509	545	37	3	24S(79.9663)	sp|Q92615|LAR4B_HUMAN	Q92615	LAR4B_HUMAN	LARP4B	La-related protein 4B			1	0	MS/MS	STY:79.9663@FT(0.0184)S(0.0090)S(0.0090)QT(0.0090)QS(0.0090)PT(0.0090)PPKPPS(0.0379)PS(0.0379)FELGLS(0.8421)S(0.0186)FPPLPGAAGNLK;
FVSEGDGGR	FVS[79.9663]EGDGGR	R	L	444	452	9	2	3S(79.9663)	sp|Q53EL6-2|PDCD4_HUMAN	Q53EL6-2	PDCD4_HUMAN	PDCD4	Isoform 2 of Programmed cell death protein 4		sp|Q53EL6|PDCD4_HUMAN	1	5495365	MS/MS	STY:79.9663@FVS(1.0000)EGDGGR;
GAASQARGSDSEDGEFEIQAEDDAR	GAASQARGS[79.9663]DS[79.9663]EDGEFEIQAEDDAR	R	A	31	55	25	3	11S(79.9663),9S(79.9663)	sp|Q8TDD1-2|DDX54_HUMAN	Q8TDD1-2	DDX54_HUMAN	DDX54	Isoform 2 of ATP-dependent RNA helicase DDX54		sp|Q8TDD1|DDX54_HUMAN	1	1.4101e+06	MS/MS	STY:79.9663@GAAS(0.5047)QARGS(0.7476)DS(0.7476)EDGEFEIQAEDDAR;
GADNDGSGSESGYTTPK	GADNDGSGSES[79.9663]GYTTPK	K	K	206	222	17	2	11S(79.9663)	sp|Q7Z417|NUFP2_HUMAN	Q7Z417	NUFP2_HUMAN	NUFIP2	FMR1-interacting protein NUFIP2			1	1.74478e+06	MS/MS	STY:79.9663@GADNDGS(0.0195)GS(0.0195)ES(0.3174)GY(0.3174)T(0.3174)T(0.0088)PK;
GAEAFGDSEEDGEDVFEVEK	GAEAFGDS[79.9663]EEDGEDVFEVEK	R	I	44	63	20	2	8S(79.9663)	sp|Q99549-2|MPP8_HUMAN	Q99549-2	MPP8_HUMAN	MPHOSPH8	Isoform 2 of M-phase phosphoprotein 8		sp|Q99549|MPP8_HUMAN	1	0	MS/MS	STY:79.9663@GAEAFGDS(1.0000)EEDGEDVFEVEK;
GAEETSWSGEER	GAEET[79.9663]SWSGEER	K	A	958	969	12	2	5T(79.9663)	sp|Q9H7N4|SFR19_HUMAN	Q9H7N4	SFR19_HUMAN	SCAF1	Splicing factor, arginine/serine-rich 19			1	0	MS/MS	STY:79.9663@GAEET(0.3333)S(0.3333)WS(0.3333)GEER;
GAGATSGSPPAGRN	GAGATSGS[79.9663]PPAGRN	K	-	194	207	14	2	8S(79.9663)	sp|P16455|MGMT_HUMAN	P16455	MGMT_HUMAN	MGMT	Methylated-DNA--protein-cysteine methyltransferase			1	1.48488e+06	MS/MS	STY:79.9663@GAGAT(0.0749)S(0.0749)GS(0.8502)PPAGRN;
GAGDGSDEEVDGK	GAGDGS[79.9663]DEEVDGK	K	A	1938	1950	13	2	6S(79.9663)	sp|P35579|MYH9_HUMAN	P35579	MYH9_HUMAN	MYH9	Myosin-9		sp|P35579-2|MYH9_HUMAN	6	2.6639992E7	MS/MS	STY:79.9663@GAGDGS(1.0000)DEEVDGK;
GAGDGSDEEVDGKADGAEAK	GAGDGS[79.9663]DEEVDGKADGAEAK	K	P	1938	1957	20	2,3	6S(79.9663)	sp|P35579|MYH9_HUMAN	P35579	MYH9_HUMAN	MYH9	Myosin-9		sp|P35579-2|MYH9_HUMAN	3	4.05348e+06	MS/MS	STY:79.9663@GAGDGS(1.0000)DEEVDGKADGAEAK;
GAGDGSDEEVDGKADGAEAKPAE	GAGDGS[79.9663]DEEVDGKADGAEAKPAE	K	-	1938	1960	23	2,3	6S(79.9663)	sp|P35579|MYH9_HUMAN	P35579	MYH9_HUMAN	MYH9	Myosin-9		sp|P35579-2|MYH9_HUMAN	6	2.2634748E7	MS/MS	STY:79.9663@GAGDGS(1.0000)DEEVDGKADGAEAKPAE;
GARPPAAGPGGDEDEDEEDTAPESALDTSLDK	GARPPAAGPGGDEDEDEEDT[79.9663]APESALDTSLDK	R	S	1160	1191	32	3	20T(79.9663)	sp|Q27J81-2|INF2_HUMAN	Q27J81-2	INF2_HUMAN	INF2	Isoform 2 of Inverted formin-2		sp|Q27J81|INF2_HUMAN	2	0	MS/MS	STY:79.9663@GARPPAAGPGGDEDEDEEDT(0.2500)APES(0.2500)ALDT(0.2500)S(0.2500)LDK;
GAVENEEDLPELSDSGDEAAWEDEDDADLPHGK	GAVENEEDLPELS[79.9663]DS[79.9663]GDEAAWEDEDDADLPHGK	R	Q	13	45	33	3	13S(79.9663),15S(79.9663)	sp|O60678|ANM3_HUMAN	O60678	ANM3_HUMAN	PRMT3	Protein arginine N-methyltransferase 3			1	0	MS/MS	STY:79.9663@GAVENEEDLPELS(1.0000)DS(1.0000)GDEAAWEDEDDADLPHGK;
GDDDEESDEEAVK	GDDDEES[79.9663]DEEAVK	K	K	613	625	13	2	7S(79.9663)	sp|O43395|PRPF3_HUMAN	O43395	PRPF3_HUMAN	PRPF3	U4/U6 small nuclear ribonucleoprotein Prp3			2	0	MS/MS	STY:79.9663@GDDDEES(1.0000)DEEAVK;
GDDDEESDEEAVKK	GDDDEES[79.9663]DEEAVKK	K	T	613	626	14	2	7S(79.9663)	sp|O43395|PRPF3_HUMAN	O43395	PRPF3_HUMAN	PRPF3	U4/U6 small nuclear ribonucleoprotein Prp3			2	0	MS/MS	STY:79.9663@GDDDEES(1.0000)DEEAVKK;
GDPPRLSPDPVAGSAVSQELR	GDPPRLS[79.9663]PDPVAGSAVSQELR	R	E	48	68	21	3	7S(79.9663)	sp|Q9BUR4|TCAB1_HUMAN	Q9BUR4	TCAB1_HUMAN	WRAP53	Telomerase Cajal body protein 1			1	548707	MS/MS	STY:79.9663@GDPPRLS(0.6573)PDPVAGS(0.1714)AVS(0.1714)QELR;
GDQPAASGDSDDDEPPPLPR	GDQPAAS[79.9663]GDSDDDEPPPLPR	R	L	48	67	20	2	7S(79.9663)	sp|O00264-2|PGRC1_HUMAN	O00264-2	PGRC1_HUMAN	PGRMC1	Isoform 2 of Membrane-associated progesterone receptor component 1		sp|O00264|PGRC1_HUMAN	2	5486849	MS/MS	STY:79.9663@GDQPAAS(0.5000)GDS(0.5000)DDDEPPPLPR;
GDSIEEILADSEDEEDNEEEERSR	GDSIEEILADS[79.9663]EDEEDNEEEERSR	K	G	970	993	24	3	11S(79.9663)	sp|Q5JTH9-2|RRP12_HUMAN	Q5JTH9-2	RRP12_HUMAN	RRP12	Isoform 2 of RRP12-like protein		sp|Q5JTH9-3|RRP12_HUMAN, sp|Q5JTH9|RRP12_HUMAN	1	4.04422e+06	MS/MS	STY:79.9663@GDS(0.0704)IEEILADS(0.8699)EDEEDNEEEERS(0.0597)R;
GDSESEEDEDLEVPVPSR	GDS[79.9663]ES[79.9663]EEDEDLEVPVPSR	K	F	76	93	18	2	3S(79.9663),5S(79.9663)	sp|P13861-2|KAP2_HUMAN	P13861-2	KAP2_HUMAN	PRKAR2A	Isoform 2 of cAMP-dependent protein kinase type II-alpha regulatory subunit		sp|P13861|KAP2_HUMAN	3	0	MS/MS	STY:79.9663@GDS(0.9353)ES(0.9353)EEDEDLEVPVPS(0.1295)R;
GDVTAEEAAGASPAK	GDVTAEEAAGAS[79.9663]PAK	R	A	11	25	15	2	12S(79.9663)	sp|P49006|MRP_HUMAN	P49006	MRP_HUMAN	MARCKSL1	MARCKS-related protein			1	0	MS/MS	STY:79.9663@GDVT(0.1032)AEEAAGAS(0.8968)PAK;
GEAAAERPGEAAVASSPSK	GEAAAERPGEAAVAS[79.9663]SPSK	K	A	12	30	19	2,3	15S(79.9663)	sp|P29966|MARCS_HUMAN	P29966	MARCS_HUMAN	MARCKS	Myristoylated alanine-rich C-kinase substrate			4	1.1574222E7	MS/MS	STY:79.9663@GEAAAERPGEAAVAS(0.3333)S(0.3333)PS(0.3333)K;
GEAEQSEEEADEEDKAEDAREEEYEPEK	GEAEQSEEEADEEDKAEDAREEEY[79.9663]EPEK	K	M	1011	1038	28	3	24Y(79.9663)	sp|P46821|MAP1B_HUMAN	P46821	MAP1B_HUMAN	MAP1B	Microtubule-associated protein 1B			1	3.8180088E7	MS/MS	STY:79.9663@GEAEQS(0.3613)EEEADEEDKAEDAREEEY(0.6387)EPEK;
GEAEQSEEEADEEDK	GEAEQS[79.9663]EEEADEEDK	K	A	1011	1025	15	2	6S(79.9663)	sp|P46821|MAP1B_HUMAN	P46821	MAP1B_HUMAN	MAP1B	Microtubule-associated protein 1B			1	0	MS/MS	STY:79.9663@GEAEQS(1.0000)EEEADEEDK;
GEAEQSEEEADEEDKAEDAREEEYEPEK	GEAEQS[79.9663]EEEADEEDKAEDAREEEYEPEK	K	M	1011	1038	28	3,4	6S(79.9663)	sp|P46821|MAP1B_HUMAN	P46821	MAP1B_HUMAN	MAP1B	Microtubule-associated protein 1B			6	4.4698384E7	MS/MS	STY:79.9663@GEAEQS(0.9047)EEEADEEDKAEDAREEEY(0.0953)EPEK;
GEDSAEETEAK	GEDS[79.9663]AEETEAK	K	P	479	489	11	2	4S(79.9663)	sp|Q12906-2|ILF3_HUMAN	Q12906-2	ILF3_HUMAN	ILF3	Isoform 2 of Interleukin enhancer-binding factor 3		sp|Q12906-3|ILF3_HUMAN, sp|Q12906-4|ILF3_HUMAN, sp|Q12906-5|ILF3_HUMAN, sp|Q12906-6|ILF3_HUMAN, sp|Q12906-7|ILF3_HUMAN, sp|Q12906|ILF3_HUMAN	2	2.1232572E7	MS/MS	STY:79.9663@GEDS(0.5000)AEET(0.5000)EAK;
GEFSASPMLK	GEFSAS[79.9663]PMLK	R	S	1119	1128	10	2	6S(79.9663)	sp|Q9UQ35|SRRM2_HUMAN	Q9UQ35	SRRM2_HUMAN	SRRM2	Serine/arginine repetitive matrix protein 2		sp|Q9UQ35-2|SRRM2_HUMAN	1	4524081	MS/MS	STY:79.9663@GEFS(0.0649)AS(0.9351)PMLK;
GEFSASPMLK	GEFS[79.9663]ASPMLK	R	S	1119	1128	10	2	4S(79.9663)	sp|Q9UQ35|SRRM2_HUMAN	Q9UQ35	SRRM2_HUMAN	SRRM2	Serine/arginine repetitive matrix protein 2		sp|Q9UQ35-2|SRRM2_HUMAN	2	4524081	MS/MS	STY:79.9663@GEFS(0.9371)AS(0.0629)PMLK;
GEGDAPFSEPGTTSTQRPSSPETATK	GEGDAPFSEPGTTSTQRPSSPETAT[79.9663]K	R	Q	304	329	26	3	25T(79.9663)	sp|Q9UQ35|SRRM2_HUMAN	Q9UQ35	SRRM2_HUMAN	SRRM2	Serine/arginine repetitive matrix protein 2		sp|Q9UQ35-2|SRRM2_HUMAN, sp|Q9UQ35-3|SRRM2_HUMAN	1	1.0618346E7	MS/MS	STY:79.9663@GEGDAPFS(0.0085)EPGT(0.0085)T(0.0097)S(0.0109)T(0.0109)QRPS(0.0843)S(0.0843)PET(0.0843)AT(0.6985)K;
GEGDAPFSEPGTTSTQRPSSPETATK	GEGDAPFSEPGTTSTQRPS[79.9663]S[79.9663]PETATK	R	Q	304	329	26	3	19S(79.9663),20S(79.9663)	sp|Q9UQ35|SRRM2_HUMAN	Q9UQ35	SRRM2_HUMAN	SRRM2	Serine/arginine repetitive matrix protein 2		sp|Q9UQ35-2|SRRM2_HUMAN, sp|Q9UQ35-3|SRRM2_HUMAN	2	3.53296e+06	MS/MS	STY:79.9663@GEGDAPFS(0.0199)EPGT(0.0199)T(0.0199)S(0.0199)T(0.0199)QRPS(0.4751)S(0.4751)PET(0.4751)AT(0.4751)K;
GEGDAPFSEPGTTSTQRPSSPETATK	GEGDAPFSEPGT[79.9663]TSTQRPSSPETATK	R	Q	304	329	26	3	12T(79.9663)	sp|Q9UQ35|SRRM2_HUMAN	Q9UQ35	SRRM2_HUMAN	SRRM2	Serine/arginine repetitive matrix protein 2		sp|Q9UQ35-2|SRRM2_HUMAN, sp|Q9UQ35-3|SRRM2_HUMAN	1	2.461729E7	MS/MS	STY:79.9663@GEGDAPFS(0.0064)EPGT(0.1411)T(0.1411)S(0.1411)T(0.1411)QRPS(0.1411)S(0.1411)PET(0.1411)AT(0.0062)K;
GEGDAPFSEPGTTSTQRPSSPETATK	GEGDAPFS[79.9663]EPGTTSTQRPSSPETATK	R	Q	304	329	26	3	8S(79.9663)	sp|Q9UQ35|SRRM2_HUMAN	Q9UQ35	SRRM2_HUMAN	SRRM2	Serine/arginine repetitive matrix protein 2		sp|Q9UQ35-2|SRRM2_HUMAN, sp|Q9UQ35-3|SRRM2_HUMAN	1	2.461729E7	MS/MS	STY:79.9663@GEGDAPFS(0.1111)EPGT(0.1111)T(0.1111)S(0.1111)T(0.1111)QRPS(0.1111)S(0.1111)PET(0.1111)AT(0.1111)K;
GEGDIHENVDTDLPGSLGQSEEKPVPAAPVPSPVAPAPVPSR	GEGDIHENVDTDLPGSLGQSEEKPVPAAPVPS[79.9663]PVAPAPVPSR	K	R	54	95	42	4	32S(79.9663)	sp|Q9UK76-3|JUPI1_HUMAN	Q9UK76-3	JUPI1_HUMAN	JPT1	Isoform 3 of Jupiter microtubule associated homolog 1		sp|Q9UK76|JUPI1_HUMAN	2	2.80624e+06	MS/MS	STY:79.9663@GEGDIHENVDT(0.0182)DLPGS(0.0195)LGQS(0.0195)EEKPVPAAPVPS(0.9181)PVAPAPVPS(0.0247)R;
GEPAAAAAPEAGASPVEK	GEPAAAAAPEAGAS[79.9663]PVEK	K	E	88	105	18	2	14S(79.9663)	sp|P29966|MARCS_HUMAN	P29966	MARCS_HUMAN	MARCKS	Myristoylated alanine-rich C-kinase substrate			3	9162724	MS/MS	STY:79.9663@GEPAAAAAPEAGAS(1.0000)PVEK;
GEPNVSYICSR	GEPNVSYIC[57.0215]S[79.9663]R	R	Y	273	283	11	2	10S(79.9663),9C(57.0215)	sp|P49840|GSK3A_HUMAN	P49840	GSK3A_HUMAN	GSK3A	Glycogen synthase kinase-3 alpha	GSK3B	sp|P49841-2|GSK3B_HUMAN, sp|P49841|GSK3B_HUMAN	2	7986123	MS/MS	STY:79.9663@GEPNVS(0.1607)Y(0.1607)ICS(0.6787)R;
GEPNVSYICSR	GEPNVS[79.9663]YIC[57.0215]SR	R	Y	273	283	11	2	6S(79.9663),9C(57.0215)	sp|P49840|GSK3A_HUMAN	P49840	GSK3A_HUMAN	GSK3A	Glycogen synthase kinase-3 alpha	GSK3B	sp|P49841-2|GSK3B_HUMAN, sp|P49841|GSK3B_HUMAN	9	1.3586244E7	MS/MS	STY:79.9663@GEPNVS(0.8012)Y(0.1221)ICS(0.0767)R;
GEQVSQNGLPAEQGSPR	GEQVS[79.9663]QNGLPAEQGSPR	K	V	2124	2140	17	2	5S(79.9663)	sp|Q01082-2|SPTB2_HUMAN	Q01082-2	SPTB2_HUMAN	SPTBN1	Isoform Short of Spectrin beta chain, non-erythrocytic 1		sp|Q01082-3|SPTB2_HUMAN, sp|Q01082|SPTB2_HUMAN	1	0	MS/MS	STY:79.9663@GEQVS(0.5362)QNGLPAEQGS(0.4638)PR;
GEVPPKETPK	GEVPPKET[79.9663]PK	K	K	78	87	10	2	8T(79.9663)	sp|P49006|MRP_HUMAN	P49006	MRP_HUMAN	MARCKSL1	MARCKS-related protein			1	0	MS/MS	STY:79.9663@GEVPPKET(1.0000)PK;
GFEEEHKDSDDDSSDDEQEK	GFEEEHKDS[79.9663]DDDS[79.9663]S[79.9663]DDEQEK	K	K	423	442	20	3	13S(79.9663),14S(79.9663),9S(79.9663)	sp|Q13435|SF3B2_HUMAN	Q13435	SF3B2_HUMAN	SF3B2	Splicing factor 3B subunit 2			5	3.3205128E7	MS/MS	STY:79.9663@GFEEEHKDS(1.0000)DDDS(1.0000)S(1.0000)DDEQEK;
GFGDGYNGYGGGPGGGNFGGSPGYGGGR	GFGDGYNGYGGGPGGGNFGGSPGY[79.9663]GGGR	R	G	227	254	28	3	24Y(79.9663)	sp|P22626-2|ROA2_HUMAN	P22626-2	ROA2_HUMAN	HNRNPA2B1	Isoform A2 of Heterogeneous nuclear ribonucleoproteins A2/B1		sp|P22626|ROA2_HUMAN	1	0	MS/MS	STY:79.9663@GFGDGY(0.0333)NGY(0.0248)GGGPGGGNFGGS(0.1239)PGY(0.8180)GGGR;
GFGDGYNGYGGGPGGGNFGGSPGYGGGR	GFGDGYNGYGGGPGGGNFGGS[79.9663]PGYGGGR	R	G	227	254	28	3	21S(79.9663)	sp|P22626-2|ROA2_HUMAN	P22626-2	ROA2_HUMAN	HNRNPA2B1	Isoform A2 of Heterogeneous nuclear ribonucleoproteins A2/B1		sp|P22626|ROA2_HUMAN	2	1.2495434E7	MS/MS	STY:79.9663@GFGDGY(0.0680)NGY(0.0853)GGGPGGGNFGGS(0.8228)PGY(0.0239)GGGR;
GFGDGYNGYGGGPGGGNFGGSPGYGGGR	GFGDGY[79.9663]NGYGGGPGGGNFGGSPGYGGGR	R	G	227	254	28	3	6Y(79.9663)	sp|P22626-2|ROA2_HUMAN	P22626-2	ROA2_HUMAN	HNRNPA2B1	Isoform A2 of Heterogeneous nuclear ribonucleoproteins A2/B1		sp|P22626|ROA2_HUMAN	1	1.2495434E7	MS/MS	STY:79.9663@GFGDGY(0.4034)NGY(0.4034)GGGPGGGNFGGS(0.1751)PGY(0.0181)GGGR;
GFGFGQGAGALVHSE	GFGFGQGAGALVHS[79.9663]E	K	-	179	193	15	2	14S(79.9663)	sp|P21291|CSRP1_HUMAN	P21291	CSRP1_HUMAN	CSRP1	Cysteine and glycine-rich protein 1			3	1.288996E7	MS/MS	STY:79.9663@GFGFGQGAGALVHS(1.0000)E;
GFSDSGGGPPAK	GFS[79.9663]DSGGGPPAK	R	Q	64	75	12	2	3S(79.9663)	sp|Q9H307|PININ_HUMAN	Q9H307	PININ_HUMAN	PNN	Pinin			2	1.32268e+06	MS/MS	STY:79.9663@GFS(0.5000)DS(0.5000)GGGPPAK;
GGAPDPSPGATATPGAPAQPSSPDAR	GGAPDPSPGATATPGAPAQPS[79.9663]SPDAR	R	R	505	530	26	3	21S(79.9663)	sp|O95365|ZBT7A_HUMAN	O95365	ZBT7A_HUMAN	ZBTB7A	Zinc finger and BTB domain-containing protein 7A			1	0	MS/MS	STY:79.9663@GGAPDPS(0.0157)PGAT(0.0157)AT(0.0157)PGAPAQPS(0.4765)S(0.4765)PDAR;
GGGGDMAEPSEAGDAPPDDGPPGELGPDGPDGPEEK	GGGGDMAEPS[79.9663]EAGDAPPDDGPPGELGPDGPDGPEEK	R	G	302	337	36	3	10S(79.9663)	sp|P08621-2|RU17_HUMAN	P08621-2	RU17_HUMAN	SNRNP70	Isoform 2 of U1 small nuclear ribonucleoprotein 70 kDa		sp|P08621-4|RU17_HUMAN, sp|P08621|RU17_HUMAN	3	2.50051e+06	MS/MS	STY:79.9663@GGGGDMAEPS(1.0000)EAGDAPPDDGPPGELGPDGPDGPEEK;
GGGGDMAEPSEAGDAPPDDGPPGELGPDGPDGPEEK	GGGGDM[15.9949]AEPS[79.9663]EAGDAPPDDGPPGELGPDGPDGPEEK	R	G	302	337	36	3	10S(79.9663),6M(15.9949)	sp|P08621-2|RU17_HUMAN	P08621-2	RU17_HUMAN	SNRNP70	Isoform 2 of U1 small nuclear ribonucleoprotein 70 kDa		sp|P08621-4|RU17_HUMAN, sp|P08621|RU17_HUMAN	2	2.23204e+06	MS/MS	STY:79.9663@GGGGDMAEPS(1.0000)EAGDAPPDDGPPGELGPDGPDGPEEK;M:15.9949@GGGGDM(1.0000)AEPSEAGDAPPDDGPPGELGPDGPDGPEEK;
GGLSPANDTGAK	GGLSPANDT[79.9663]GAK	R	K	44	55	12	2	9T(79.9663)	sp|P30419|NMT1_HUMAN	P30419	NMT1_HUMAN	NMT1	Glycylpeptide N-tetradecanoyltransferase 1			1	4873601	MS/MS	STY:79.9663@GGLS(0.2063)PANDT(0.7937)GAK;
GGLSPANDTGAK	GGLS[79.9663]PANDTGAK	R	K	44	55	12	2	4S(79.9663)	sp|P30419|NMT1_HUMAN	P30419	NMT1_HUMAN	NMT1	Glycylpeptide N-tetradecanoyltransferase 1			1	4710184	MS/MS	STY:79.9663@GGLS(0.9358)PANDT(0.0642)GAK;
GGNFGFGDSRGGGGNFGPGPGSNFR	GGNFGFGDS[79.9663]RGGGGNFGPGPGSNFR	R	G	192	216	25	3	9S(79.9663)	sp|P22626-2|ROA2_HUMAN	P22626-2	ROA2_HUMAN	HNRNPA2B1	Isoform A2 of Heterogeneous nuclear ribonucleoproteins A2/B1		sp|P22626|ROA2_HUMAN	1	2.76855e+06	MS/MS	STY:79.9663@GGNFGFGDS(0.5174)RGGGGNFGPGPGS(0.4826)NFR;
GGNVFAALIQDQSEEEEEEEK	GGNVFAALIQDQS[79.9663]EEEEEEEK	K	H	128	148	21	3	13S(79.9663)	sp|Q8NE71|ABCF1_HUMAN	Q8NE71	ABCF1_HUMAN	ABCF1	ATP-binding cassette sub-family F member 1		sp|Q8NE71-2|ABCF1_HUMAN	1	0	MS/MS	STY:79.9663@GGNVFAALIQDQS(1.0000)EEEEEEEK;
GGNVFAALIQDQSEEEEEEEKHPPK	GGNVFAALIQDQS[79.9663]EEEEEEEKHPPK	K	P	128	152	25	4	13S(79.9663)	sp|Q8NE71|ABCF1_HUMAN	Q8NE71	ABCF1_HUMAN	ABCF1	ATP-binding cassette sub-family F member 1		sp|Q8NE71-2|ABCF1_HUMAN	1	1.9446e+06	MS/MS	STY:79.9663@GGNVFAALIQDQS(1.0000)EEEEEEEKHPPK;
GGSISVQVNSIKFDSE	GGSISVQVNSIKFDS[79.9663]E	R	-	694	709	16	2	15S(79.9663)	sp|Q14978-2|NOLC1_HUMAN	Q14978-2	NOLC1_HUMAN	NOLC1	Isoform Beta of Nucleolar and coiled-body phosphoprotein 1		sp|Q14978-3|NOLC1_HUMAN, sp|Q14978|NOLC1_HUMAN	3	4.4571724E7	MS/MS	STY:79.9663@GGS(0.0205)IS(0.0206)VQVNS(0.0207)IKFDS(0.9382)E;
GGSISVQVNSIKFDSE	GGSISVQVNS[79.9663]IKFDSE	R	-	694	709	16	2	10S(79.9663)	sp|Q14978-2|NOLC1_HUMAN	Q14978-2	NOLC1_HUMAN	NOLC1	Isoform Beta of Nucleolar and coiled-body phosphoprotein 1		sp|Q14978-3|NOLC1_HUMAN, sp|Q14978|NOLC1_HUMAN	1	4.4571724E7	MS/MS	STY:79.9663@GGS(0.0262)IS(0.0262)VQVNS(0.4738)IKFDS(0.4738)E;
GGVTGSPEASISGSK	GGVTGSPEASIS[79.9663]GSK	K	G	5726	5740	15	2	12S(79.9663)	sp|Q09666|AHNK_HUMAN	Q09666	AHNK_HUMAN	AHNAK	Neuroblast differentiation-associated protein AHNAK			1	1.5846478E7	MS/MS	STY:79.9663@GGVT(0.0282)GS(0.0282)PEAS(0.0370)IS(0.4534)GS(0.4534)K;
GGVTGSPEASISGSK	GGVTGSPEAS[79.9663]ISGSK	K	G	5726	5740	15	2	10S(79.9663)	sp|Q09666|AHNK_HUMAN	Q09666	AHNK_HUMAN	AHNAK	Neuroblast differentiation-associated protein AHNAK			1	0	MS/MS	STY:79.9663@GGVT(0.1944)GS(0.1944)PEAS(0.2037)IS(0.2037)GS(0.2037)K;
GGVTGSPEASISGSK	GGVTGS[79.9663]PEASISGSK	K	G	5726	5740	15	2	6S(79.9663)	sp|Q09666|AHNK_HUMAN	Q09666	AHNK_HUMAN	AHNAK	Neuroblast differentiation-associated protein AHNAK			2	1.5846478E7	MS/MS	STY:79.9663@GGVT(0.0371)GS(0.6425)PEAS(0.0302)IS(0.0302)GS(0.2600)K;
GGVTGSPEASISGSK	GGVT[79.9663]GSPEASISGSK	K	G	5726	5740	15	2	4T(79.9663)	sp|Q09666|AHNK_HUMAN	Q09666	AHNK_HUMAN	AHNAK	Neuroblast differentiation-associated protein AHNAK			2	1.5509986E7	MS/MS	STY:79.9663@GGVT(0.4723)GS(0.4723)PEAS(0.0185)IS(0.0185)GS(0.0185)K;
GHLSRPEAQSLSPYTTSANR	GHLS[79.9663]RPEAQSLSPYTTSANR	R	A	251	270	20	3	4S(79.9663)	sp|O94776-2|MTA2_HUMAN	O94776-2	MTA2_HUMAN	MTA2	Isoform 2 of Metastasis-associated protein MTA2		sp|O94776|MTA2_HUMAN	1	1.80762e+06	MS/MS	STY:79.9663@GHLS(0.1429)RPEAQS(0.1429)LS(0.1429)PY(0.1429)T(0.1429)T(0.1429)S(0.1429)ANR;
GHTASESDEQQWPEEK	GHTAS[79.9663]ESDEQQWPEEK	R	R	1253	1268	16	2	5S(79.9663)	sp|Q9NTI5|PDS5B_HUMAN	Q9NTI5	PDS5B_HUMAN	PDS5B	Sister chromatid cohesion protein PDS5 homolog B		sp|Q9NTI5-2|PDS5B_HUMAN, sp|Q9NTI5-5|PDS5B_HUMAN	1	0	MS/MS	STY:79.9663@GHT(0.0243)AS(0.4879)ES(0.4879)DEQQWPEEK;
GHTDTEGRPPSPPPTSTPEK	GHT[79.9663]DT[79.9663]EGRPPSPPPTSTPEK	R	C	353	372	20	3	3T(79.9663),5T(79.9663)	sp|Q00613-2|HSF1_HUMAN	Q00613-2	HSF1_HUMAN	HSF1	Isoform Short of Heat shock factor protein 1		sp|Q00613|HSF1_HUMAN	1	2.15702e+06	MS/MS	STY:79.9663@GHT(0.3333)DT(0.3333)EGRPPS(0.3333)PPPT(0.3333)S(0.3333)T(0.3333)PEK;
GHYEVTGSDDETGK	GHYEVTGSDDET[79.9663]GK	K	L	5834	5847	14	2	12T(79.9663)	sp|Q09666|AHNK_HUMAN	Q09666	AHNK_HUMAN	AHNAK	Neuroblast differentiation-associated protein AHNAK			2	1.512271E7	MS/MS	STY:79.9663@GHY(0.0617)EVT(0.0617)GS(0.0617)DDET(0.8150)GK;
GHYEVTGSDDETGK	GHYEVT[79.9663]GSDDETGK	K	L	5834	5847	14	2,3	6T(79.9663)	sp|Q09666|AHNK_HUMAN	Q09666	AHNK_HUMAN	AHNAK	Neuroblast differentiation-associated protein AHNAK			2	1.8826672E7	MS/MS	STY:79.9663@GHY(0.0105)EVT(0.3298)GS(0.3298)DDET(0.3298)GK;
GHYEVTGSDDETGK	GHY[79.9663]EVTGSDDETGK	K	L	5834	5847	14	2,3	3Y(79.9663)	sp|Q09666|AHNK_HUMAN	Q09666	AHNK_HUMAN	AHNAK	Neuroblast differentiation-associated protein AHNAK			4	1.8826672E7	MS/MS	STY:79.9663@GHY(0.8776)EVT(0.0408)GS(0.0408)DDET(0.0408)GK;
GIPLATGDTSPEPELLPGAPLPPPK	GIPLATGDTS[79.9663]PEPELLPGAPLPPPK	K	E	33	57	25	3	10S(79.9663)	sp|O75821|EIF3G_HUMAN	O75821	EIF3G_HUMAN	EIF3G	Eukaryotic translation initiation factor 3 subunit G			1	0	MS/MS	STY:79.9663@GIPLAT(0.0510)GDT(0.0510)S(0.8980)PEPELLPGAPLPPPK;
GIPLATGDTSPEPELLPGAPLPPPK	GIPLATGDT[79.9663]SPEPELLPGAPLPPPK	K	E	33	57	25	3	9T(79.9663)	sp|O75821|EIF3G_HUMAN	O75821	EIF3G_HUMAN	EIF3G	Eukaryotic translation initiation factor 3 subunit G			1	5.04531e+06	MS/MS	STY:79.9663@GIPLAT(0.0938)GDT(0.4531)S(0.4531)PEPELLPGAPLPPPK;
GIPLATGDTSPEPELLPGAPLPPPK	GIPLAT[79.9663]GDTSPEPELLPGAPLPPPK	K	E	33	57	25	3	6T(79.9663)	sp|O75821|EIF3G_HUMAN	O75821	EIF3G_HUMAN	EIF3G	Eukaryotic translation initiation factor 3 subunit G			1	7709760	MS/MS	STY:79.9663@GIPLAT(0.3333)GDT(0.3333)S(0.3333)PEPELLPGAPLPPPK;
GISPIVFDR	GIS[79.9663]PIVFDR	R	S	306	314	9	2	3S(79.9663)	sp|Q96MU7-2|YTDC1_HUMAN	Q96MU7-2	YTDC1_HUMAN	YTHDC1	Isoform 2 of YTH domain-containing protein 1		sp|Q96MU7|YTDC1_HUMAN	1	978938	MS/MS	STY:79.9663@GIS(1.0000)PIVFDR;
GKLSAEENPDDSEVPSSSGINSTK	GKLS[79.9663]AEENPDDSEVPSSSGINSTK	K	S	40	63	24	3	4S(79.9663)	sp|Q9Y5Q9-2|TF3C3_HUMAN	Q9Y5Q9-2	TF3C3_HUMAN	GTF3C3	Isoform 2 of General transcription factor 3C polypeptide 3		sp|Q9Y5Q9|TF3C3_HUMAN	1	3.97317e+06	MS/MS	STY:79.9663@GKLS(0.4787)AEENPDDS(0.4787)EVPS(0.0085)S(0.0085)S(0.0085)GINS(0.0085)T(0.0085)K;
GLAGPPASPGK	GLAGPPAS[79.9663]PGK	K	A	597	607	11	2	8S(79.9663)	sp|Q9P206-2|K1522_HUMAN	Q9P206-2	K1522_HUMAN	KIAA1522	Isoform 2 of Uncharacterized protein KIAA1522		sp|Q9P206-3|K1522_HUMAN, sp|Q9P206|K1522_HUMAN	1	0	MS/MS	STY:79.9663@GLAGPPAS(1.0000)PGK;
GLGPPSPPAPPR	GLGPPS[79.9663]PPAPPR	R	G	90	101	12	2	6S(79.9663)	sp|Q13425-2|SNTB2_HUMAN	Q13425-2	SNTB2_HUMAN	SNTB2	Isoform 2 of Beta-2-syntrophin		sp|Q13425|SNTB2_HUMAN	1	1.18724e+06	MS/MS	STY:79.9663@GLGPPS(1.0000)PPAPPR;
GLLAQGLRPESPPPAGPLLNGAPAGESPQPK	GLLAQGLRPESPPPAGPLLNGAPAGES[79.9663]PQPK	R	A	642	672	31	3	27S(79.9663)	sp|Q96TA1-2|NIBA2_HUMAN	Q96TA1-2	NIBA2_HUMAN	NIBAN2	Isoform 2 of Protein Niban 2		sp|Q96TA1|NIBA2_HUMAN	1	0	MS/MS	STY:79.9663@GLLAQGLRPES(0.2971)PPPAGPLLNGAPAGES(0.7029)PQPK;
GLLAQGLRPESPPPAGPLLNGAPAGESPQPK	GLLAQGLRPES[79.9663]PPPAGPLLNGAPAGESPQPK	R	A	642	672	31	3	11S(79.9663)	sp|Q96TA1-2|NIBA2_HUMAN	Q96TA1-2	NIBA2_HUMAN	NIBAN2	Isoform 2 of Protein Niban 2		sp|Q96TA1|NIBA2_HUMAN	22	9.7883816E7	MS/MS	STY:79.9663@GLLAQGLRPES(0.9401)PPPAGPLLNGAPAGES(0.0599)PQPK;
GLLAQGLRPESPPPAGPLLNGAPAGESPQPK	GLLAQGLRPES[79.9663]PPPAGPLLNGAPAGES[79.9663]PQPK	R	A	642	672	31	3	11S(79.9663),27S(79.9663)	sp|Q96TA1-2|NIBA2_HUMAN	Q96TA1-2	NIBA2_HUMAN	NIBAN2	Isoform 2 of Protein Niban 2		sp|Q96TA1|NIBA2_HUMAN	4	1.2100876E7	MS/MS	STY:79.9663@GLLAQGLRPES(1.0000)PPPAGPLLNGAPAGES(1.0000)PQPK;
GLLYDSDEEDEERPAR	GLLYDS[79.9663]DEEDEERPAR	R	K	134	149	16	2	6S(79.9663)	sp|P49736|MCM2_HUMAN	P49736	MCM2_HUMAN	MCM2	DNA replication licensing factor MCM2			1	5.2553616E7	MS/MS	STY:79.9663@GLLY(0.0603)DS(0.9397)DEEDEERPAR;
GLLYDSDEEDEERPAR	GLLY[79.9663]DSDEEDEERPAR	R	K	134	149	16	2,3	4Y(79.9663)	sp|P49736|MCM2_HUMAN	P49736	MCM2_HUMAN	MCM2	DNA replication licensing factor MCM2			4	6.148216E7	MS/MS	STY:79.9663@GLLY(0.8477)DS(0.1523)DEEDEERPAR;
GLMAGGRPEGQYSEDEDTDTDEYK	GLMAGGRPEGQY[79.9663]S[79.9663]EDEDTDTDEYK	R	E	418	441	24	3	12Y(79.9663),13S(79.9663)	sp|Q9NPQ8-2|RIC8A_HUMAN	Q9NPQ8-2	RIC8A_HUMAN	RIC8A	Isoform 2 of Synembryn-A		sp|Q9NPQ8-3|RIC8A_HUMAN, sp|Q9NPQ8-4|RIC8A_HUMAN, sp|Q9NPQ8|RIC8A_HUMAN	1	0	MS/MS	STY:79.9663@GLMAGGRPEGQY(0.4000)S(0.4000)EDEDT(0.4000)DT(0.4000)DEY(0.4000)K;
GLRDSHSSEEDEASSQTDLSQTISK	GLRDS[79.9663]HS[79.9663]SEEDEASSQTDLSQTISK	R	K	150	174	25	3	5S(79.9663),7S(79.9663)	sp|Q5JTV8-2|TOIP1_HUMAN	Q5JTV8-2	TOIP1_HUMAN	TOR1AIP1	Isoform 2 of Torsin-1A-interacting protein 1		sp|Q5JTV8-3|TOIP1_HUMAN, sp|Q5JTV8-4|TOIP1_HUMAN, sp|Q5JTV8|TOIP1_HUMAN	2	6.36289e+06	MS/MS	STY:79.9663@GLRDS(0.7320)HS(0.5726)S(0.5726)EEDEAS(0.0205)S(0.0205)QT(0.0205)DLS(0.0205)QT(0.0205)IS(0.0204)K;
GLRDSHSSEEDEASSQTDLSQTISK	GLRDS[79.9663]HS[79.9663]S[79.9663]EEDEASSQTDLSQTISK	R	K	150	174	25	3	5S(79.9663),7S(79.9663),8S(79.9663)	sp|Q5JTV8-2|TOIP1_HUMAN	Q5JTV8-2	TOIP1_HUMAN	TOR1AIP1	Isoform 2 of Torsin-1A-interacting protein 1		sp|Q5JTV8-3|TOIP1_HUMAN, sp|Q5JTV8-4|TOIP1_HUMAN, sp|Q5JTV8|TOIP1_HUMAN	1	4472867	MS/MS	STY:79.9663@GLRDS(0.8044)HS(0.8016)S(0.8016)EEDEAS(0.0990)S(0.1148)QT(0.1148)DLS(0.0879)QT(0.0879)IS(0.0879)K;
GLSASLPDLDSENWIEVK	GLSASLPDLDS[79.9663]ENWIEVK	K	K	544	561	18	2	11S(79.9663)	sp|Q6PKG0|LARP1_HUMAN	Q6PKG0	LARP1_HUMAN	LARP1	La-related protein 1		sp|Q6PKG0-3|LARP1_HUMAN	1	0	MS/MS	STY:79.9663@GLS(0.3127)AS(0.3127)LPDLDS(0.3745)ENWIEVK;
GLSASLPDLDSENWIEVK	GLS[79.9663]ASLPDLDSENWIEVK	K	K	544	561	18	2	3S(79.9663)	sp|Q6PKG0|LARP1_HUMAN	Q6PKG0	LARP1_HUMAN	LARP1	La-related protein 1		sp|Q6PKG0-3|LARP1_HUMAN	1	0	MS/MS	STY:79.9663@GLS(0.4539)AS(0.4539)LPDLDS(0.0923)ENWIEVK;
GNAEGSSDEEGKLVIDEPAK	GNAEGS[79.9663]S[79.9663]DEEGKLVIDEPAK	K	E	120	139	20	2,3	6S(79.9663),7S(79.9663)	sp|P51858-2|HDGF_HUMAN	P51858-2	HDGF_HUMAN	HDGF	Isoform 2 of Hepatoma-derived growth factor		sp|P51858-3|HDGF_HUMAN, sp|P51858|HDGF_HUMAN	4	2.16278e+06	MS/MS	STY:79.9663@GNAEGS(1.0000)S(1.0000)DEEGKLVIDEPAK;
GNDPLTSSPGR	GNDPLTSS[79.9663]PGR	R	S	20	30	11	2	8S(79.9663)	sp|P49736|MCM2_HUMAN	P49736	MCM2_HUMAN	MCM2	DNA replication licensing factor MCM2			1	4.0553e+06	MS/MS	STY:79.9663@GNDPLT(0.2046)S(0.2046)S(0.5908)PGR;
GNDPLTSSPGR	GNDPLTS[79.9663]SPGR	R	S	20	30	11	2	7S(79.9663)	sp|P49736|MCM2_HUMAN	P49736	MCM2_HUMAN	MCM2	DNA replication licensing factor MCM2			1	1.2758094E7	MS/MS	STY:79.9663@GNDPLT(0.0265)S(0.4868)S(0.4868)PGR;
GNDPLTSSPGR	GNDPLT[79.9663]SSPGR	R	S	20	30	11	2	6T(79.9663)	sp|P49736|MCM2_HUMAN	P49736	MCM2_HUMAN	MCM2	DNA replication licensing factor MCM2			7	1.681339E7	MS/MS	STY:79.9663@GNDPLT(0.3333)S(0.3333)S(0.3333)PGR;
GNDSDGEGESDDPEK	GNDS[79.9663]DGEGESDDPEK	K	K	99	113	15	2	4S(79.9663)	sp|O75351|VPS4B_HUMAN	O75351	VPS4B_HUMAN	VPS4B	Vacuolar protein sorting-associated protein 4B			1	0	MS/MS	STY:79.9663@GNDS(0.8731)DGEGES(0.1269)DDPEK;
GNDSDGEGESDDPEKK	GNDS[79.9663]DGEGESDDPEKK	K	K	99	114	16	2	4S(79.9663)	sp|O75351|VPS4B_HUMAN	O75351	VPS4B_HUMAN	VPS4B	Vacuolar protein sorting-associated protein 4B			2	0	MS/MS	STY:79.9663@GNDS(0.9226)DGEGES(0.0774)DDPEKK;
GNEPGSDRSPSPSK	GNEPGSDRS[79.9663]PS[79.9663]PSK	R	N	883	896	14	2	11S(79.9663),9S(79.9663)	sp|Q5VT52-2|RPRD2_HUMAN	Q5VT52-2	RPRD2_HUMAN	RPRD2	Isoform 2 of Regulation of nuclear pre-mRNA domain-containing protein 2		sp|Q5VT52-3|RPRD2_HUMAN, sp|Q5VT52|RPRD2_HUMAN	1	0	MS/MS	STY:79.9663@GNEPGS(0.3530)DRS(0.5490)PS(0.5490)PS(0.5490)K;
GNVVPSPLPTRR	GNVVPSPLPT[79.9663]RR	R	T	36	47	12	2	10T(79.9663)	sp|Q9Y2V2|CHSP1_HUMAN	Q9Y2V2	CHSP1_HUMAN	CARHSP1	Calcium-regulated heat-stable protein 1			1	1.35041e+06	MS/MS	STY:79.9663@GNVVPS(0.2152)PLPT(0.7848)RR;
GPASDSETEDASR	GPAS[79.9663]DS[79.9663]ETEDASR	K	H	103	115	13	2	4S(79.9663),6S(79.9663)	sp|Q96ST2-3|IWS1_HUMAN	Q96ST2-3	IWS1_HUMAN	IWS1	Isoform 3 of Protein IWS1 homolog		sp|Q96ST2|IWS1_HUMAN	2	2.71585e+06	MS/MS	STY:79.9663@GPAS(0.9301)DS(0.9301)ET(0.0757)EDAS(0.0642)R;
GPDEAMEDGEEGSDDEAEWVVTK	GPDEAMEDGEEGSDDEAEWVVT[79.9663]K	R	D	290	312	23	3	22T(79.9663)	sp|Q9NZN4-2|EHD2_HUMAN	Q9NZN4-2	EHD2_HUMAN	EHD2	Isoform 2 of EH domain-containing protein 2		sp|Q9NZN4|EHD2_HUMAN	1	2.65806e+06	MS/MS	STY:79.9663@GPDEAMEDGEEGS(0.3326)DDEAEWVVT(0.6674)K;
GPLPAAPPVAPERQPSWDPSPVSSTVPAPSPLSAAAVSPSK	GPLPAAPPVAPERQPS[79.9663]WDPSPVSSTVPAPSPLSAAAVSPSK	R	L	92	132	41	3	16S(79.9663)	sp|Q9NQC3-2|RTN4_HUMAN	Q9NQC3-2	RTN4_HUMAN	RTN4	Isoform B of Reticulon-4		sp|Q9NQC3-5|RTN4_HUMAN, sp|Q9NQC3|RTN4_HUMAN	1	0	MS/MS	STY:79.9663@GPLPAAPPVAPERQPS(0.1111)WDPS(0.1111)PVS(0.1111)S(0.1111)T(0.1111)VPAPS(0.1111)PLS(0.1111)AAAVS(0.1111)PS(0.1111)K;
GPPASSPAPAPK	GPPAS[79.9663]SPAPAPK	R	F	97	108	12	2	5S(79.9663)	sp|Q15942-2|ZYX_HUMAN	Q15942-2	ZYX_HUMAN	ZYX	Isoform 2 of Zyxin		sp|Q15942|ZYX_HUMAN	2	732190	MS/MS	STY:79.9663@GPPAS(0.5000)S(0.5000)PAPAPK;
GPPDFSSDEEREPTPVLGSGAAAAGR	GPPDFSSDEEREPTPVLGS[79.9663]GAAAAGR	K	S	61	86	26	3	19S(79.9663)	sp|P42167-2|LAP2B_HUMAN	P42167-2	LAP2B_HUMAN	TMPO	Isoform Gamma of Lamina-associated polypeptide 2, isoforms beta/gamma		sp|P42166|LAP2A_HUMAN, sp|P42167-3|LAP2B_HUMAN, sp|P42167|LAP2B_HUMAN	3	3.9188724E7	MS/MS	STY:79.9663@GPPDFS(0.0554)S(0.0554)DEEREPT(0.0825)PVLGS(0.8066)GAAAAGR;
GPPDFSSDEEREPTPVLGSGAAAAGR	GPPDFSSDEEREPT[79.9663]PVLGSGAAAAGR	K	S	61	86	26	3	14T(79.9663)	sp|P42167-2|LAP2B_HUMAN	P42167-2	LAP2B_HUMAN	TMPO	Isoform Gamma of Lamina-associated polypeptide 2, isoforms beta/gamma		sp|P42166|LAP2A_HUMAN, sp|P42167-3|LAP2B_HUMAN, sp|P42167|LAP2B_HUMAN	10	3.9188724E7	MS/MS	STY:79.9663@GPPDFS(0.0249)S(0.0249)DEEREPT(0.9271)PVLGS(0.0230)GAAAAGR;
GPPDFSSDEEREPTPVLGSGAAAAGR	GPPDFS[79.9663]SDEEREPTPVLGSGAAAAGR	K	S	61	86	26	3	6S(79.9663)	sp|P42167-2|LAP2B_HUMAN	P42167-2	LAP2B_HUMAN	TMPO	Isoform Gamma of Lamina-associated polypeptide 2, isoforms beta/gamma		sp|P42166|LAP2A_HUMAN, sp|P42167-3|LAP2B_HUMAN, sp|P42167|LAP2B_HUMAN	11	2.0835854E7	MS/MS	STY:79.9663@GPPDFS(0.4756)S(0.4756)DEEREPT(0.0244)PVLGS(0.0244)GAAAAGR;
GPPDFSSDEEREPTPVLGSGAAAAGR	GPPDFS[79.9663]SDEEREPTPVLGS[79.9663]GAAAAGR	K	S	61	86	26	3	19S(79.9663),6S(79.9663)	sp|P42167-2|LAP2B_HUMAN	P42167-2	LAP2B_HUMAN	TMPO	Isoform Gamma of Lamina-associated polypeptide 2, isoforms beta/gamma		sp|P42166|LAP2A_HUMAN, sp|P42167-3|LAP2B_HUMAN, sp|P42167|LAP2B_HUMAN	1	3.9263724E7	MS/MS	STY:79.9663@GPPDFS(0.4914)S(0.4914)DEEREPT(0.4914)PVLGS(0.5258)GAAAAGR;
GPPDFSSDEEREPTPVLGSGAAAAGR	GPPDFS[79.9663]SDEEREPT[79.9663]PVLGSGAAAAGR	K	S	61	86	26	3	14T(79.9663),6S(79.9663)	sp|P42167-2|LAP2B_HUMAN	P42167-2	LAP2B_HUMAN	TMPO	Isoform Gamma of Lamina-associated polypeptide 2, isoforms beta/gamma		sp|P42166|LAP2A_HUMAN, sp|P42167-3|LAP2B_HUMAN, sp|P42167|LAP2B_HUMAN	4	2.7874106E7	MS/MS	STY:79.9663@GPPDFS(0.6324)S(0.6324)DEEREPT(0.6850)PVLGS(0.0502)GAAAAGR;
GPPDFSSDEEREPTPVLGSGAAAAGR	GPPDFS[79.9663]SDEEREPT[79.9663]PVLGS[79.9663]GAAAAGR	K	S	61	86	26	3	14T(79.9663),19S(79.9663),6S(79.9663)	sp|P42167-2|LAP2B_HUMAN	P42167-2	LAP2B_HUMAN	TMPO	Isoform Gamma of Lamina-associated polypeptide 2, isoforms beta/gamma		sp|P42166|LAP2A_HUMAN, sp|P42167-3|LAP2B_HUMAN, sp|P42167|LAP2B_HUMAN	1	1.9455286E7	MS/MS	STY:79.9663@GPPDFS(0.7404)S(0.7404)DEEREPT(0.7596)PVLGS(0.7596)GAAAAGR;
GPPDFSSDEEREPTPVLGSGAAAAGR	GPPDFS[79.9663]S[79.9663]DEEREPTPVLGSGAAAAGR	K	S	61	86	26	3	6S(79.9663),7S(79.9663)	sp|P42167-2|LAP2B_HUMAN	P42167-2	LAP2B_HUMAN	TMPO	Isoform Gamma of Lamina-associated polypeptide 2, isoforms beta/gamma		sp|P42166|LAP2A_HUMAN, sp|P42167-3|LAP2B_HUMAN, sp|P42167|LAP2B_HUMAN	8	4.502492E7	MS/MS	STY:79.9663@GPPDFS(0.9347)S(0.9347)DEEREPT(0.0696)PVLGS(0.0609)GAAAAGR;
GPPDFSSDEEREPTPVLGSGAAAAGR	GPPDFS[79.9663]S[79.9663]DEEREPTPVLGS[79.9663]GAAAAGR	K	S	61	86	26	3	19S(79.9663),6S(79.9663),7S(79.9663)	sp|P42167-2|LAP2B_HUMAN	P42167-2	LAP2B_HUMAN	TMPO	Isoform Gamma of Lamina-associated polypeptide 2, isoforms beta/gamma		sp|P42166|LAP2A_HUMAN, sp|P42167-3|LAP2B_HUMAN, sp|P42167|LAP2B_HUMAN	2	1.9378684E7	MS/MS	STY:79.9663@GPPDFS(0.7604)S(0.7400)DEEREPT(0.7400)PVLGS(0.7597)GAAAAGR;
GPPDFSSDEEREPTPVLGSGAAAAGR	GPPDFS[79.9663]S[79.9663]DEEREPT[79.9663]PVLGSGAAAAGR	K	S	61	86	26	3	14T(79.9663),6S(79.9663),7S(79.9663)	sp|P42167-2|LAP2B_HUMAN	P42167-2	LAP2B_HUMAN	TMPO	Isoform Gamma of Lamina-associated polypeptide 2, isoforms beta/gamma		sp|P42166|LAP2A_HUMAN, sp|P42167-3|LAP2B_HUMAN, sp|P42167|LAP2B_HUMAN	4	1.9378684E7	MS/MS	STY:79.9663@GPPDFS(0.9197)S(0.9197)DEEREPT(0.9196)PVLGS(0.2409)GAAAAGR;
GPPQSPVFEGVYNNSR	GPPQS[79.9663]PVFEGVYNNSR	K	M	107	122	16	2,3	5S(79.9663)	sp|Q8WWM7-2|ATX2L_HUMAN	Q8WWM7-2	ATX2L_HUMAN	ATXN2L	Isoform 2 of Ataxin-2-like protein		sp|Q8WWM7-3|ATX2L_HUMAN, sp|Q8WWM7-4|ATX2L_HUMAN, sp|Q8WWM7-5|ATX2L_HUMAN, sp|Q8WWM7-6|ATX2L_HUMAN, sp|Q8WWM7-7|ATX2L_HUMAN, sp|Q8WWM7-8|ATX2L_HUMAN, sp|Q8WWM7-9|ATX2L_HUMAN, sp|Q8WWM7|ATX2L_HUMAN	3	5.62894e+06	MS/MS	STY:79.9663@GPPQS(0.8649)PVFEGVY(0.0694)NNS(0.0657)R;
GPPSPPAPVMHSPSRK	GPPS[79.9663]PPAPVMHS[79.9663]PSRK	R	M	221	236	16	3	12S(79.9663),4S(79.9663)	sp|Q13573|SNW1_HUMAN	Q13573	SNW1_HUMAN	SNW1	SNW domain-containing protein 1			2	9087031	MS/MS	STY:79.9663@GPPS(0.6844)PPAPVMHS(0.6578)PS(0.6578)RK;
GPSSVEDIK	GPS[79.9663]SVEDIK	K	A	211	219	9	2	3S(79.9663)	sp|P06748-2|NPM_HUMAN	P06748-2	NPM_HUMAN	NPM1	Isoform 2 of Nucleophosmin		sp|P06748-3|NPM_HUMAN, sp|P06748|NPM_HUMAN	1	0	MS/MS	STY:79.9663@GPS(0.5000)S(0.5000)VEDIK;
GPSWDPFR	GPS[79.9663]WDPFR	R	D	13	20	8	2	3S(79.9663)	sp|P04792|HSPB1_HUMAN	P04792	HSPB1_HUMAN	HSPB1	Heat shock protein beta-1			2	3605549	MS/MS	STY:79.9663@GPS(1.0000)WDPFR;
GPVGTVSEAQLAR	GPVGT[79.9663]VSEAQLAR	K	R	126	138	13	2	5T(79.9663)	sp|Q9NZM1-2|MYOF_HUMAN	Q9NZM1-2	MYOF_HUMAN	MYOF	Isoform 2 of Myoferlin		sp|Q9NZM1-3|MYOF_HUMAN, sp|Q9NZM1-5|MYOF_HUMAN, sp|Q9NZM1-6|MYOF_HUMAN, sp|Q9NZM1-7|MYOF_HUMAN, sp|Q9NZM1-8|MYOF_HUMAN, sp|Q9NZM1|MYOF_HUMAN	1	0	MS/MS	STY:79.9663@GPVGT(0.5000)VS(0.5000)EAQLAR;
GQPGNAYDGAGQPSAAYLSMSQGAVANANSTPPPYER	GQPGNAYDGAGQPSAAY[79.9663]LSMSQGAVANANSTPPPYER	R	T	542	578	37	3	17Y(79.9663)	sp|Q96PK6|RBM14_HUMAN	Q96PK6	RBM14_HUMAN	RBM14	RNA-binding protein 14			1	9833905	MS/MS	STY:79.9663@GQPGNAY(0.0628)DGAGQPS(0.0211)AAY(0.7633)LS(0.0224)MS(0.0366)QGAVANANS(0.0366)T(0.0366)PPPY(0.0205)ER;
GQPGNAYDGAGQPSAAYLSMSQGAVANANSTPPPYER	GQPGNAYDGAGQPS[79.9663]AAYLSMSQGAVANANSTPPPYER	R	T	542	578	37	3	14S(79.9663)	sp|Q96PK6|RBM14_HUMAN	Q96PK6	RBM14_HUMAN	RBM14	RNA-binding protein 14			1	9833905	MS/MS	STY:79.9663@GQPGNAY(0.0072)DGAGQPS(0.2375)AAY(0.2375)LS(0.2375)MS(0.2375)QGAVANANS(0.0195)T(0.0195)PPPY(0.0039)ER;
GQPGNAYDGAGQPSAAYLSMSQGAVANANSTPPPYER	GQPGNAY[79.9663]DGAGQPSAAYLSMSQGAVANANSTPPPYER	R	T	542	578	37	3	7Y(79.9663)	sp|Q96PK6|RBM14_HUMAN	Q96PK6	RBM14_HUMAN	RBM14	RNA-binding protein 14			1	9833905	MS/MS	STY:79.9663@GQPGNAY(0.2121)DGAGQPS(0.2121)AAY(0.2121)LS(0.2121)MS(0.0122)QGAVANANS(0.0465)T(0.0465)PPPY(0.0465)ER;
GQTPLTEGSEDLDGHSDPEESFAR	GQTPLTEGSEDLDGHS[79.9663]DPEESFAR	R	D	110	133	24	3	16S(79.9663)	sp|Q86VR2-2|RETR3_HUMAN	Q86VR2-2	RETR3_HUMAN	RETREG3	Isoform 2 of Reticulophagy regulator 3		sp|Q86VR2|RETR3_HUMAN	1	0	MS/MS	STY:79.9663@GQT(0.0302)PLT(0.0302)EGS(0.0558)EDLDGHS(0.8430)DPEES(0.0408)FAR;
GQTPLTEGSEDLDGHSDPEESFAR	GQT[79.9663]PLTEGSEDLDGHSDPEESFAR	R	D	110	133	24	3	3T(79.9663)	sp|Q86VR2-2|RETR3_HUMAN	Q86VR2-2	RETR3_HUMAN	RETREG3	Isoform 2 of Reticulophagy regulator 3		sp|Q86VR2|RETR3_HUMAN	1	4.5842e+06	MS/MS	STY:79.9663@GQT(0.2000)PLT(0.2000)EGS(0.2000)EDLDGHS(0.2000)DPEES(0.2000)FAR;
GRAEGEWEDQEALDYFSDK	GRAEGEWEDQEALDYFS[79.9663]DK	K	E	367	385	19	3	17S(79.9663)	sp|Q9NYF8-2|BCLF1_HUMAN	Q9NYF8-2	BCLF1_HUMAN	BCLAF1	Isoform 2 of Bcl-2-associated transcription factor 1		sp|Q9NYF8-3|BCLF1_HUMAN, sp|Q9NYF8|BCLF1_HUMAN	2	1.388379E7	MS/MS	STY:79.9663@GRAEGEWEDQEALDY(0.1262)FS(0.8738)DK;
GRAEGEWEDQEALDYFSDKESGK	GRAEGEWEDQEALDYFS[79.9663]DKES[79.9663]GK	K	Q	367	389	23	3	17S(79.9663),21S(79.9663)	sp|Q9NYF8-2|BCLF1_HUMAN	Q9NYF8-2	BCLF1_HUMAN	BCLAF1	Isoform 2 of Bcl-2-associated transcription factor 1		sp|Q9NYF8-3|BCLF1_HUMAN, sp|Q9NYF8|BCLF1_HUMAN	1	1.97832e+06	MS/MS	STY:79.9663@GRAEGEWEDQEALDY(0.6613)FS(0.6693)DKES(0.6693)GK;
GRAEGEWEDQEALDYFSDK	GRAEGEWEDQEALDY[79.9663]FSDK	K	E	367	385	19	2,3	15Y(79.9663)	sp|Q9NYF8-2|BCLF1_HUMAN	Q9NYF8-2	BCLF1_HUMAN	BCLAF1	Isoform 2 of Bcl-2-associated transcription factor 1		sp|Q9NYF8-3|BCLF1_HUMAN, sp|Q9NYF8|BCLF1_HUMAN	5	1.8742714E7	MS/MS	STY:79.9663@GRAEGEWEDQEALDY(0.5000)FS(0.5000)DK;
GRDDPGQQETDSSEDEDIIGPMPAK	GRDDPGQQET[79.9663]DS[79.9663]S[79.9663]EDEDIIGPMPAK	K	G	129	153	25	3	10T(79.9663),12S(79.9663),13S(79.9663)	sp|Q8IXQ4|GPAM1_HUMAN	Q8IXQ4	GPAM1_HUMAN	GPALPP1	GPALPP motifs-containing protein 1			2	2.87934e+06	MS/MS	STY:79.9663@GRDDPGQQET(1.0000)DS(1.0000)S(1.0000)EDEDIIGPMPAK;
GREDVSNFDDEFTSEAPILTPPREPR	GREDVSNFDDEFTSEAPILT[79.9663]PPREPR	R	I	923	948	26	3	20T(79.9663)	sp|Q16513-2|PKN2_HUMAN	Q16513-2	PKN2_HUMAN	PKN2	Isoform 2 of Serine/threonine-protein kinase N2		sp|Q16513-3|PKN2_HUMAN, sp|Q16513-4|PKN2_HUMAN, sp|Q16513-5|PKN2_HUMAN, sp|Q16513|PKN2_HUMAN	1	1.1223396E7	MS/MS	STY:79.9663@GREDVS(0.0448)NFDDEFT(0.0448)S(0.0370)EAPILT(0.8734)PPREPR;
GRLDSSEMDHSENEDYTMSSPLPGK	GRLDSS[79.9663]EMDHS[79.9663]ENEDYTMSSPLPGK	K	K	1172	1196	25	3	11S(79.9663),6S(79.9663)	sp|Q9NTI5|PDS5B_HUMAN	Q9NTI5	PDS5B_HUMAN	PDS5B	Sister chromatid cohesion protein PDS5 homolog B		sp|Q9NTI5-2|PDS5B_HUMAN	1	5256116	MS/MS	STY:79.9663@GRLDS(0.2224)S(0.5779)EMDHS(0.5730)ENEDY(0.0468)T(0.0468)MS(0.2665)S(0.2665)PLPGK;
GRLDSSEMDHSENEDYTMSSPLPGK	GRLDS[79.9663]SEMDHSENEDYTMSS[79.9663]PLPGK	K	K	1172	1196	25	3	20S(79.9663),5S(79.9663)	sp|Q9NTI5|PDS5B_HUMAN	Q9NTI5	PDS5B_HUMAN	PDS5B	Sister chromatid cohesion protein PDS5 homolog B		sp|Q9NTI5-2|PDS5B_HUMAN	1	5256116	MS/MS	STY:79.9663@GRLDS(0.5595)S(0.5595)EMDHS(0.0527)ENEDY(0.0527)T(0.0527)MS(0.0527)S(0.6701)PLPGK;
GRLDSSEMDHSENEDYTMSSPLPGK	GRLDS[79.9663]S[79.9663]EMDHSENEDYTMSSPLPGK	K	K	1172	1196	25	3	5S(79.9663),6S(79.9663)	sp|Q9NTI5|PDS5B_HUMAN	Q9NTI5	PDS5B_HUMAN	PDS5B	Sister chromatid cohesion protein PDS5 homolog B		sp|Q9NTI5-2|PDS5B_HUMAN	1	5.31161e+06	MS/MS	STY:79.9663@GRLDS(0.4520)S(0.4520)EMDHS(0.4520)ENEDY(0.4520)T(0.0640)MS(0.0640)S(0.0640)PLPGK;
GRLDSSEMDHSENEDYTMSSPLPGK	GRLDS[79.9663]S[79.9663]EM[15.9949]DHSENEDYTMSSPLPGK	K	K	1172	1196	25	3	5S(79.9663),6S(79.9663),8M(15.9949)	sp|Q9NTI5|PDS5B_HUMAN	Q9NTI5	PDS5B_HUMAN	PDS5B	Sister chromatid cohesion protein PDS5 homolog B		sp|Q9NTI5-2|PDS5B_HUMAN	1	0	MS/MS	STY:79.9663@GRLDS(0.6204)S(0.6204)EMDHS(0.1519)ENEDY(0.1519)T(0.1519)MS(0.1519)S(0.1519)PLPGK;M:15.9949@GRLDSSEM(0.7768)DHSENEDYTM(0.2232)SSPLPGK;
GRLSPVPVPR	GRLS[79.9663]PVPVPR	R	A	116	125	10	2	4S(79.9663)	sp|Q9UKM9-2|RALY_HUMAN	Q9UKM9-2	RALY_HUMAN	RALY	Isoform 1 of RNA-binding protein Raly		sp|Q9UKM9|RALY_HUMAN	1	9206788	MS/MS	STY:79.9663@GRLS(1.0000)PVPVPR;
GRLTPSPDIIVLSDNEASSPR	GRLT[79.9663]PS[79.9663]PDIIVLSDNEASS[79.9663]PR	R	S	117	137	21	3	19S(79.9663),4T(79.9663),6S(79.9663)	sp|Q8WXI9|P66B_HUMAN	Q8WXI9	P66B_HUMAN	GATAD2B	Transcriptional repressor p66-beta			1	0	MS/MS	STY:79.9663@GRLT(0.8378)PS(0.8378)PDIIVLS(0.3404)DNEAS(0.1492)S(0.8347)PR;
GRSPQPPAEEDEDDFDDTLVAIDTYNCDLHFK	GRSPQPPAEEDEDDFDDT[79.9663]LVAIDTYNC[57.0215]DLHFK	R	V	192	223	32	3,4	18T(79.9663),27C(57.0215)	sp|Q9BUJ2-2|HNRL1_HUMAN	Q9BUJ2-2	HNRL1_HUMAN	HNRNPUL1	Isoform 2 of Heterogeneous nuclear ribonucleoprotein U-like protein 1		sp|Q9BUJ2-3|HNRL1_HUMAN, sp|Q9BUJ2-4|HNRL1_HUMAN, sp|Q9BUJ2|HNRL1_HUMAN	3	0	MS/MS	STY:79.9663@GRS(0.0283)PQPPAEEDEDDFDDT(0.9260)LVAIDT(0.0229)Y(0.0229)NCDLHFK;
GRSIDQDYER	GRS[79.9663]IDQDYER	R	A	219	228	10	2	3S(79.9663)	sp|Q9UDY2-3|ZO2_HUMAN	Q9UDY2-3	ZO2_HUMAN	TJP2	Isoform C1 of Tight junction protein ZO-2		sp|Q9UDY2-2|ZO2_HUMAN, sp|Q9UDY2-4|ZO2_HUMAN, sp|Q9UDY2-5|ZO2_HUMAN, sp|Q9UDY2-6|ZO2_HUMAN, sp|Q9UDY2-7|ZO2_HUMAN, sp|Q9UDY2|ZO2_HUMAN	1	0	MS/MS	STY:79.9663@GRS(0.8728)IDQDY(0.1272)ER;
GRSPSPKPR	GRS[79.9663]PS[79.9663]PKPR	R	G	1760	1768	9	2,3	3S(79.9663),5S(79.9663)	sp|Q9UQ35|SRRM2_HUMAN	Q9UQ35	SRRM2_HUMAN	SRRM2	Serine/arginine repetitive matrix protein 2		sp|Q9UQ35-2|SRRM2_HUMAN	3	4.72513e+06	MS/MS	STY:79.9663@GRS(1.0000)PS(1.0000)PKPR;
GSAPHSESDLPEQEEEILGSDDDEQEDPNDYCK	GSAPHSESDLPEQEEEILGSDDDEQEDPNDY[79.9663]C[57.0215]K	R	G	203	235	33	3	31Y(79.9663),32C(57.0215)	sp|Q96SB4-3|SRPK1_HUMAN	Q96SB4-3	SRPK1_HUMAN	SRPK1	Isoform 1 of SRSF protein kinase 1		sp|Q96SB4-4|SRPK1_HUMAN, sp|Q96SB4|SRPK1_HUMAN	1	0	MS/MS	STY:79.9663@GS(0.2536)APHS(0.2789)ES(0.1635)DLPEQEEEILGS(0.0218)DDDEQEDPNDY(0.2822)CK;
GSGTASDDEFENLR	GSGTAS[79.9663]DDEFENLR	R	I	1902	1915	14	2	6S(79.9663)	sp|Q7Z6Z7-2|HUWE1_HUMAN	Q7Z6Z7-2	HUWE1_HUMAN	HUWE1	Isoform 2 of E3 ubiquitin-protein ligase HUWE1		sp|Q7Z6Z7-3|HUWE1_HUMAN, sp|Q7Z6Z7|HUWE1_HUMAN	1	6.4301e+06	MS/MS	STY:79.9663@GS(0.0431)GT(0.0431)AS(0.9138)DDEFENLR;
GSPHYFSPFRPY	GSPHYFSPFRPY[79.9663]	R	-	210	221	12	3	12Y(79.9663)	sp|Q13242|SRSF9_HUMAN	Q13242	SRSF9_HUMAN	SRSF9	Serine/arginine-rich splicing factor 9			1	3.7408e+06	MS/MS	STY:79.9663@GS(0.0357)PHY(0.0357)FS(0.0357)PFRPY(0.8928);
GSPHYFSPFRPY	GSPHY[79.9663]FSPFRPY	R	-	210	221	12	2	5Y(79.9663)	sp|Q13242|SRSF9_HUMAN	Q13242	SRSF9_HUMAN	SRSF9	Serine/arginine-rich splicing factor 9			1	1.3971318E7	MS/MS	STY:79.9663@GS(0.0371)PHY(0.8888)FS(0.0394)PFRPY(0.0347);
GSVPLSSSPPATHFPDETEITNPVPK	GSVPLSSSPPATHFPDET[79.9663]EITNPVPK	K	K	1412	1437	26	3	18T(79.9663)	sp|P11388-2|TOP2A_HUMAN	P11388-2	TOP2A_HUMAN	TOP2A	Isoform 2 of DNA topoisomerase 2-alpha		sp|P11388-3|TOP2A_HUMAN, sp|P11388-4|TOP2A_HUMAN, sp|P11388|TOP2A_HUMAN	1	1.8536184E7	MS/MS	STY:79.9663@GS(0.0093)VPLS(0.0177)S(0.0177)S(0.0177)PPAT(0.0177)HFPDET(0.4598)EIT(0.4598)NPVPK;
GSVPLSSSPPATHFPDETEITNPVPK	GSVPLSSSPPAT[79.9663]HFPDETEITNPVPK	K	K	1412	1437	26	3	12T(79.9663)	sp|P11388-2|TOP2A_HUMAN	P11388-2	TOP2A_HUMAN	TOP2A	Isoform 2 of DNA topoisomerase 2-alpha		sp|P11388-3|TOP2A_HUMAN, sp|P11388-4|TOP2A_HUMAN, sp|P11388|TOP2A_HUMAN	1	1.8484252E7	MS/MS	STY:79.9663@GS(0.0084)VPLS(0.0162)S(0.0162)S(0.0162)PPAT(0.3143)HFPDET(0.3143)EIT(0.3143)NPVPK;
GSFSDTGLGDGK	GS[79.9663]FSDTGLGDGK	K	M	376	387	12	2	2S(79.9663)	sp|Q9Y2W1|TR150_HUMAN	Q9Y2W1	TR150_HUMAN	THRAP3	Thyroid hormone receptor-associated protein 3			1	2397546	MS/MS	STY:79.9663@GS(0.3333)FS(0.3333)DT(0.3333)GLGDGK;
GSGTASDDEFENLR	GS[79.9663]GTASDDEFENLR	R	I	1902	1915	14	2	2S(79.9663)	sp|Q7Z6Z7-2|HUWE1_HUMAN	Q7Z6Z7-2	HUWE1_HUMAN	HUWE1	Isoform 2 of E3 ubiquitin-protein ligase HUWE1		sp|Q7Z6Z7-3|HUWE1_HUMAN, sp|Q7Z6Z7|HUWE1_HUMAN	2	6.4301e+06	MS/MS	STY:79.9663@GS(0.7297)GT(0.1352)AS(0.1352)DDEFENLR;
GSPHYFSPFRPY	GS[79.9663]PHYFSPFRPY	R	-	210	221	12	2	2S(79.9663)	sp|Q13242|SRSF9_HUMAN	Q13242	SRSF9_HUMAN	SRSF9	Serine/arginine-rich splicing factor 9			3	1.6178734E7	MS/MS	STY:79.9663@GS(0.9323)PHY(0.0234)FS(0.0223)PFRPY(0.0220);
GSQGSPTPTR	GS[79.9663]QGS[79.9663]PT[79.9663]PTR	R	A	131	140	10	3	2S(79.9663),5S(79.9663),7T(79.9663)	sp|Q3B7T3-2|BEAN1_HUMAN	Q3B7T3-2	BEAN1_HUMAN	BEAN1	Isoform 2 of Protein BEAN1		sp|Q3B7T3|BEAN1_HUMAN	1	0	MS/MS	STY:79.9663@GS(0.7500)QGS(0.7500)PT(0.7500)PT(0.7500)R;
GSSDGRGSDSESDLPHR	GS[79.9663]SDGRGSDSESDLPHR	R	K	224	240	17	3	2S(79.9663)	sp|Q9UPQ0-10|LIMC1_HUMAN	Q9UPQ0-10	LIMC1_HUMAN	LIMCH1	Isoform 10 of LIM and calponin homology domains-containing protein 1		sp|Q9UPQ0-2|LIMC1_HUMAN, sp|Q9UPQ0-3|LIMC1_HUMAN, sp|Q9UPQ0-4|LIMC1_HUMAN, sp|Q9UPQ0-5|LIMC1_HUMAN, sp|Q9UPQ0-6|LIMC1_HUMAN, sp|Q9UPQ0-7|LIMC1_HUMAN, sp|Q9UPQ0-8|LIMC1_HUMAN, sp|Q9UPQ0-9|LIMC1_HUMAN, sp|Q9UPQ0|LIMC1_HUMAN	4	4380137	MS/MS	STY:79.9663@GS(0.3120)S(0.3120)DGRGS(0.3120)DS(0.0320)ES(0.0320)DLPHR;
GSSLSGTDDGAQEVVK	GS[79.9663]SLSGTDDGAQEVVK	R	D	275	290	16	2	2S(79.9663)	sp|Q9Y6D5|BIG2_HUMAN	Q9Y6D5	BIG2_HUMAN	ARFGEF2	Brefeldin A-inhibited guanine nucleotide-exchange protein 2			2	0	MS/MS	STY:79.9663@GS(0.3283)S(0.3283)LS(0.3283)GT(0.0150)DDGAQEVVK;
GSSDGRGSDSESDLPHR	GS[79.9663]S[79.9663]DGRGSDSESDLPHR	R	K	224	240	17	3	2S(79.9663),3S(79.9663)	sp|Q9UPQ0-10|LIMC1_HUMAN	Q9UPQ0-10	LIMC1_HUMAN	LIMCH1	Isoform 10 of LIM and calponin homology domains-containing protein 1		sp|Q9UPQ0-2|LIMC1_HUMAN, sp|Q9UPQ0-3|LIMC1_HUMAN, sp|Q9UPQ0-4|LIMC1_HUMAN, sp|Q9UPQ0-5|LIMC1_HUMAN, sp|Q9UPQ0-6|LIMC1_HUMAN, sp|Q9UPQ0-7|LIMC1_HUMAN, sp|Q9UPQ0-8|LIMC1_HUMAN, sp|Q9UPQ0-9|LIMC1_HUMAN, sp|Q9UPQ0|LIMC1_HUMAN	2	2.49641e+06	MS/MS	STY:79.9663@GS(0.4890)S(0.4890)DGRGS(0.4890)DS(0.4890)ES(0.0438)DLPHR;
GTDTQTPAVLSPSK	GTDTQTPAVLS[79.9663]PSK	K	T	718	731	14	2	11S(79.9663)	sp|P46087-2|NOP2_HUMAN	P46087-2	NOP2_HUMAN	NOP2	Isoform 2 of Probable 28S rRNA (cytosine(4447)-C(5))-methyltransferase		sp|P46087-4|NOP2_HUMAN, sp|P46087|NOP2_HUMAN	1	2659738	MS/MS	STY:79.9663@GT(0.0136)DT(0.0136)QT(0.0136)PAVLS(0.4796)PS(0.4796)K;
GTLDEEDEEADSDTDDIDHR	GTLDEEDEEADS[79.9663]DTDDIDHR	R	V	248	267	20	3	12S(79.9663)	sp|Q9HCN4-2|GPN1_HUMAN	Q9HCN4-2	GPN1_HUMAN	GPN1	Isoform 2 of GPN-loop GTPase 1		sp|Q9HCN4-3|GPN1_HUMAN, sp|Q9HCN4-4|GPN1_HUMAN, sp|Q9HCN4-5|GPN1_HUMAN, sp|Q9HCN4|GPN1_HUMAN	1	0	MS/MS	STY:79.9663@GT(0.0428)LDEEDEEADS(0.8556)DT(0.1016)DDIDHR;
GTSPSSSSRPQR	GTS[79.9663]PSSSSRPQR	K	V	642	653	12	2	3S(79.9663)	sp|Q8N1F7-2|NUP93_HUMAN	Q8N1F7-2	NUP93_HUMAN	NUP93	Isoform 2 of Nuclear pore complex protein Nup93		sp|Q8N1F7|NUP93_HUMAN	1	1.75101e+06	MS/MS	STY:79.9663@GT(0.0186)S(0.1963)PS(0.1963)S(0.1963)S(0.1963)S(0.1963)RPQR;
GTENEDAGSDYQSDNQASWIHR	GT[79.9663]ENEDAGSDYQSDNQASWIHR	K	M	446	467	22	3	2T(79.9663)	sp|P47712|PA24A_HUMAN	P47712	PA24A_HUMAN	PLA2G4A	Cytosolic phospholipase A2			1	0	MS/MS	STY:79.9663@GT(0.2283)ENEDAGS(0.2283)DY(0.2283)QS(0.2283)DNQAS(0.0867)WIHR;
GTEPSPGGTPQPSRPVSPAGPPEGVPEEAQPPR	GT[79.9663]EPS[79.9663]PGGTPQPSRPVSPAGPPEGVPEEAQPPR	K	L	110	142	33	3	2T(79.9663),5S(79.9663)	sp|Q8WUZ0-2|BCL7C_HUMAN	Q8WUZ0-2	BCL7C_HUMAN	BCL7C	Isoform 2 of B-cell CLL/lymphoma 7 protein family member C		sp|Q8WUZ0|BCL7C_HUMAN	1	3.45479e+06	MS/MS	STY:79.9663@GT(0.4617)EPS(0.4617)PGGT(0.4617)PQPS(0.4617)RPVS(0.1533)PAGPPEGVPEEAQPPR;
GTPSQSPVVGR	GT[79.9663]PSQSPVVGR	K	S	176	186	11	2	2T(79.9663)	sp|P52594-2|AGFG1_HUMAN	P52594-2	AGFG1_HUMAN	AGFG1	Isoform 2 of Arf-GAP domain and FG repeat-containing protein 1		sp|P52594-3|AGFG1_HUMAN, sp|P52594-4|AGFG1_HUMAN, sp|P52594|AGFG1_HUMAN	2	3.33808e+06	MS/MS	STY:79.9663@GT(0.3333)PS(0.3333)QS(0.3333)PVVGR;
GTSPRPPEGGLGYSQLGDDDLK	GT[79.9663]SPRPPEGGLGYSQLGDDDLK	R	E	520	541	22	3	2T(79.9663)	sp|P21127-10|CD11B_HUMAN	P21127-10	CD11B_HUMAN	CDK11B	Isoform SV11 of Cyclin-dependent kinase 11B	CDK11A	sp|P21127-12|CD11B_HUMAN, sp|P21127-2|CD11B_HUMAN, sp|P21127-3|CD11B_HUMAN, sp|P21127-4|CD11B_HUMAN, sp|P21127-5|CD11B_HUMAN, sp|P21127-6|CD11B_HUMAN, sp|P21127-8|CD11B_HUMAN, sp|P21127-9|CD11B_HUMAN, sp|P21127|CD11B_HUMAN, sp|Q9UQ88-10|CD11A_HUMAN, sp|Q9UQ88-2|CD11A_HUMAN, sp|Q9UQ88-3|CD11A_HUMAN, sp|Q9UQ88-4|CD11A_HUMAN, sp|Q9UQ88-5|CD11A_HUMAN, sp|Q9UQ88-8|CD11A_HUMAN, sp|Q9UQ88|CD11A_HUMAN	2	3.40609e+06	MS/MS	STY:79.9663@GT(0.4724)S(0.4724)PRPPEGGLGY(0.0276)S(0.0276)QLGDDDLK;
GVDFESSEDDDDDPFMNTSSLRR	GVDFES[79.9663]S[79.9663]EDDDDDPFMNTSSLRR	K	N	655	677	23	3	6S(79.9663),7S(79.9663)	sp|P49959-2|MRE11_HUMAN	P49959-2	MRE11_HUMAN	MRE11	Isoform 2 of Double-strand break repair protein MRE11		sp|P49959-3|MRE11_HUMAN, sp|P49959|MRE11_HUMAN	1	2.60229e+06	MS/MS	STY:79.9663@GVDFES(0.4000)S(0.4000)EDDDDDPFMNT(0.4000)S(0.4000)S(0.4000)LRR;
GVHIHQAGGSPPASSTSSSSLTNDVAK	GVHIHQAGGS[79.9663]PPASSTSSSSLTNDVAK	K	Q	710	736	27	3	10S(79.9663)	sp|Q8N122-3|RPTOR_HUMAN	Q8N122-3	RPTOR_HUMAN	RPTOR	Isoform 3 of Regulatory-associated protein of mTOR		sp|Q8N122|RPTOR_HUMAN	2	2.09719e+06	MS/MS	STY:79.9663@GVHIHQAGGS(0.6627)PPAS(0.0422)S(0.0422)T(0.0422)S(0.0422)S(0.0422)S(0.0422)S(0.0422)LT(0.0422)NDVAK;
GWLRDPSASPGDAGEQAIR	GWLRDPS[79.9663]ASPGDAGEQAIR	K	Q	282	300	19	3	7S(79.9663)	sp|P18206-2|VINC_HUMAN	P18206-2	VINC_HUMAN	VCL	Isoform 1 of Vinculin		sp|P18206|VINC_HUMAN	1	0	MS/MS	STY:79.9663@GWLRDPS(0.5000)AS(0.5000)PGDAGEQAIR;
GYYSPYSVSGSGSTAGSR	GYYS[79.9663]PYSVSGSGSTAGSR	K	T	4610	4627	18	2	4S(79.9663)	sp|Q15149|PLEC_HUMAN	Q15149	PLEC_HUMAN	PLEC	Plectin		sp|Q15149-2|PLEC_HUMAN, sp|Q15149-3|PLEC_HUMAN, sp|Q15149-4|PLEC_HUMAN, sp|Q15149-5|PLEC_HUMAN, sp|Q15149-6|PLEC_HUMAN, sp|Q15149-7|PLEC_HUMAN, sp|Q15149-8|PLEC_HUMAN, sp|Q15149-9|PLEC_HUMAN	1	5.41356e+06	MS/MS	STY:79.9663@GY(0.0077)Y(0.0077)S(0.3163)PY(0.3163)S(0.3163)VS(0.0047)GS(0.0046)GS(0.0072)T(0.0072)AGS(0.0120)R;
GYTSDDDTWEPEIHLEDCK	GY[79.9663]TSDDDTWEPEIHLEDC[57.0215]K	K	E	82	100	19	3	18C(57.0215),2Y(79.9663)	sp|Q99549-2|MPP8_HUMAN	Q99549-2	MPP8_HUMAN	MPHOSPH8	Isoform 2 of M-phase phosphoprotein 8		sp|Q99549|MPP8_HUMAN	1	1.40877e+06	MS/MS	STY:79.9663@GY(0.2500)T(0.2500)S(0.2500)DDDT(0.2500)WEPEIHLEDCK;
GYTSDSEVYTDHGRPGK	GY[79.9663]TSDSEVYTDHGRPGK	R	I	1316	1332	17	2,3	2Y(79.9663)	sp|Q92538-2|GBF1_HUMAN	Q92538-2	GBF1_HUMAN	GBF1	Isoform 2 of Golgi-specific brefeldin A-resistance guanine nucleotide exchange factor 1		sp|Q92538-3|GBF1_HUMAN, sp|Q92538|GBF1_HUMAN	2	2.96122e+06	MS/MS	STY:79.9663@GY(0.1989)T(0.1989)S(0.1989)DS(0.1989)EVY(0.1989)T(0.0056)DHGRPGK;
GYYSPYSVSGSGSTAGSR	GY[79.9663]YSPYSVSGSGSTAGSR	K	T	4610	4627	18	2	2Y(79.9663)	sp|Q15149|PLEC_HUMAN	Q15149	PLEC_HUMAN	PLEC	Plectin		sp|Q15149-2|PLEC_HUMAN, sp|Q15149-3|PLEC_HUMAN, sp|Q15149-4|PLEC_HUMAN, sp|Q15149-5|PLEC_HUMAN, sp|Q15149-6|PLEC_HUMAN, sp|Q15149-7|PLEC_HUMAN, sp|Q15149-8|PLEC_HUMAN, sp|Q15149-9|PLEC_HUMAN	1	5.41356e+06	MS/MS	STY:79.9663@GY(0.1000)Y(0.1000)S(0.1000)PY(0.1000)S(0.1000)VS(0.1000)GS(0.1000)GS(0.1000)T(0.1000)AGS(0.1000)R;
HAPSPEPAVQGTGVAGVPEESGDAAAIPAK	HAPS[79.9663]PEPAVQGTGVAGVPEESGDAAAIPAK	R	K	20	49	30	3	4S(79.9663)	sp|P13051|UNG_HUMAN	P13051	UNG_HUMAN	UNG	Uracil-DNA glycosylase			1	5.55353e+06	MS/MS	STY:79.9663@HAPS(0.7399)PEPAVQGT(0.1300)GVAGVPEES(0.1300)GDAAAIPAK;
HDSIPAADTFEDLSDVEGGGSEPTQR	HDSIPAADTFEDLS[79.9663]DVEGGGSEPTQR	K	D	210	235	26	3	14S(79.9663)	sp|O95671-2|ASML_HUMAN	O95671-2	ASML_HUMAN	ASMTL	Isoform 2 of Probable bifunctional dTTP/UTP pyrophosphatase/methyltransferase protein		sp|O95671-3|ASML_HUMAN, sp|O95671|ASML_HUMAN	1	0	MS/MS	STY:79.9663@HDS(0.1359)IPAADT(0.1359)FEDLS(0.6957)DVEGGGS(0.0162)EPT(0.0162)QR;
HDSPEDVK	HDS[79.9663]PEDVK	R	R	526	533	8	2	3S(79.9663)	sp|P31948-2|STIP1_HUMAN	P31948-2	STIP1_HUMAN	STIP1	Isoform 2 of Stress-induced-phosphoprotein 1		sp|P31948-3|STIP1_HUMAN, sp|P31948|STIP1_HUMAN	1	5032904	MS/MS	STY:79.9663@HDS(1.0000)PEDVK;
HFKDEDEDEDVASPDGLGR	HFKDEDEDEDVAS[79.9663]PDGLGR	K	L	537	555	19	3	13S(79.9663)	sp|O95365|ZBT7A_HUMAN	O95365	ZBT7A_HUMAN	ZBTB7A	Zinc finger and BTB domain-containing protein 7A			1	1.49345e+06	MS/MS	STY:79.9663@HFKDEDEDEDVAS(1.0000)PDGLGR;
HFSQSEETGNEVFGALNEEQPLPR	HFS[79.9663]QSEETGNEVFGALNEEQPLPR	R	S	771	794	24	3	3S(79.9663)	sp|Q6GYQ0-2|RGPA1_HUMAN	Q6GYQ0-2	RGPA1_HUMAN	RALGAPA1	Isoform 2 of Ral GTPase-activating protein subunit alpha-1		sp|Q6GYQ0-3|RGPA1_HUMAN, sp|Q6GYQ0-4|RGPA1_HUMAN, sp|Q6GYQ0-5|RGPA1_HUMAN, sp|Q6GYQ0-6|RGPA1_HUMAN, sp|Q6GYQ0-7|RGPA1_HUMAN, sp|Q6GYQ0|RGPA1_HUMAN	1	0	MS/MS	STY:79.9663@HFS(0.6567)QS(0.1717)EET(0.1717)GNEVFGALNEEQPLPR;
HIKEEPLSEEEPCTSTAIASPEK	HIKEEPLSEEEPC[57.0215]T[79.9663]S[79.9663]TAIASPEK	K	K	495	517	23	3	13C(57.0215),14T(79.9663),15S(79.9663)	sp|Q9Y2X3|NOP58_HUMAN	Q9Y2X3	NOP58_HUMAN	NOP58	Nucleolar protein 58			1	1.1137092E7	MS/MS	STY:79.9663@HIKEEPLS(0.1778)EEEPCT(0.5647)S(0.5647)T(0.5647)AIAS(0.1281)PEK;
HIKEEPLSEEEPCTSTAIASPEK	HIKEEPLS[79.9663]EEEPC[57.0215]TSTAIASPEK	K	K	495	517	23	3	13C(57.0215),8S(79.9663)	sp|Q9Y2X3|NOP58_HUMAN	Q9Y2X3	NOP58_HUMAN	NOP58	Nucleolar protein 58			4	1.0594172E7	MS/MS	STY:79.9663@HIKEEPLS(0.9330)EEEPCT(0.0168)S(0.0168)T(0.0168)AIAS(0.0166)PEK;
HIKEEPLSEEEPCTSTAIASPEK	HIKEEPLS[79.9663]EEEPC[57.0215]TSTAIAS[79.9663]PEK	K	K	495	517	23	3	13C(57.0215),20S(79.9663),8S(79.9663)	sp|Q9Y2X3|NOP58_HUMAN	Q9Y2X3	NOP58_HUMAN	NOP58	Nucleolar protein 58			1	1.1770437E7	MS/MS	STY:79.9663@HIKEEPLS(0.3910)EEEPCT(0.3910)S(0.3910)T(0.3910)AIAS(0.4361)PEK;
HIVSNDSSDSDDESHEPK	HIVSNDSSDSDDES[79.9663]HEPK	K	G	428	445	18	3	14S(79.9663)	sp|P47712|PA24A_HUMAN	P47712	PA24A_HUMAN	PLA2G4A	Cytosolic phospholipase A2			1	3.1725516E7	MS/MS	STY:79.9663@HIVS(0.0384)NDS(0.0466)S(0.0466)DS(0.0934)DDES(0.7750)HEPK;
HIVSNDSSDSDDESHEPK	HIVSNDSSDS[79.9663]DDESHEPK	K	G	428	445	18	2,3	10S(79.9663)	sp|P47712|PA24A_HUMAN	P47712	PA24A_HUMAN	PLA2G4A	Cytosolic phospholipase A2			2	3.6998088E7	MS/MS	STY:79.9663@HIVS(0.0354)NDS(0.0354)S(0.0618)DS(0.4337)DDES(0.4337)HEPK;
HIVSNDSSDSDDESHEPK	HIVSNDSS[79.9663]DSDDESHEPK	K	G	428	445	18	3	8S(79.9663)	sp|P47712|PA24A_HUMAN	P47712	PA24A_HUMAN	PLA2G4A	Cytosolic phospholipase A2			1	0	MS/MS	STY:79.9663@HIVS(0.0990)NDS(0.0990)S(0.3773)DS(0.3773)DDES(0.0473)HEPK;
HIVSNDSSDSDDESHEPK	HIVSNDS[79.9663]SDSDDESHEPK	K	G	428	445	18	3	7S(79.9663)	sp|P47712|PA24A_HUMAN	P47712	PA24A_HUMAN	PLA2G4A	Cytosolic phospholipase A2			2	3.1640024E7	MS/MS	STY:79.9663@HIVS(0.0675)NDS(0.8179)S(0.0406)DS(0.0406)DDES(0.0335)HEPK;
HIVSNDSSDSDDESHEPK	HIVSNDS[79.9663]S[79.9663]DS[79.9663]DDESHEPK	K	G	428	445	18	2	10S(79.9663),7S(79.9663),8S(79.9663)	sp|P47712|PA24A_HUMAN	P47712	PA24A_HUMAN	PLA2G4A	Cytosolic phospholipase A2			1	7.49126e+06	MS/MS	STY:79.9663@HIVS(0.2523)NDS(0.7040)S(0.7040)DS(0.6698)DDES(0.6698)HEPK;
HIVSNDSSDSDDESHEPK	HIVS[79.9663]NDSSDSDDESHEPK	K	G	428	445	18	2	4S(79.9663)	sp|P47712|PA24A_HUMAN	P47712	PA24A_HUMAN	PLA2G4A	Cytosolic phospholipase A2			1	5358062	MS/MS	STY:79.9663@HIVS(0.2477)NDS(0.2477)S(0.2477)DS(0.2477)DDES(0.0091)HEPK;
HIVSNDSSDSDDESHEPK	HIVS[79.9663]NDS[79.9663]SDSDDESHEPK	K	G	428	445	18	2,3	4S(79.9663),7S(79.9663)	sp|P47712|PA24A_HUMAN	P47712	PA24A_HUMAN	PLA2G4A	Cytosolic phospholipase A2			7	1.4670061E7	MS/MS	STY:79.9663@HIVS(0.4854)NDS(0.4854)S(0.4854)DS(0.4854)DDES(0.0582)HEPK;
HIVSNDSSDSDDESHEPK	HIVS[79.9663]NDS[79.9663]SDS[79.9663]DDESHEPK	K	G	428	445	18	2	10S(79.9663),4S(79.9663),7S(79.9663)	sp|P47712|PA24A_HUMAN	P47712	PA24A_HUMAN	PLA2G4A	Cytosolic phospholipase A2			1	7.49126e+06	MS/MS	STY:79.9663@HIVS(0.6830)NDS(0.6830)S(0.6830)DS(0.7186)DDES(0.2323)HEPK;
HIVSNDSSDSDDESHEPK	HIVS[79.9663]NDS[79.9663]S[79.9663]DSDDESHEPK	K	G	428	445	18	2,3	4S(79.9663),7S(79.9663),8S(79.9663)	sp|P47712|PA24A_HUMAN	P47712	PA24A_HUMAN	PLA2G4A	Cytosolic phospholipase A2			5	1.2770672E7	MS/MS	STY:79.9663@HIVS(0.7096)NDS(0.7096)S(0.7096)DS(0.4356)DDES(0.4356)HEPK;
HLAGYESSSTLMTSELESTSLGDSDEEDTMSR	HLAGY[79.9663]ESSSTLMTSELESTSLGDSDEEDTMSR	R	F	188	219	32	3	5Y(79.9663)	sp|O14641|DVL2_HUMAN	O14641	DVL2_HUMAN	DVL2	Segment polarity protein dishevelled homolog DVL-2			1	0	MS/MS	STY:79.9663@HLAGY(0.0769)ES(0.0769)S(0.0769)S(0.0769)T(0.0769)LMT(0.0769)S(0.0769)ELES(0.0769)T(0.0769)S(0.0769)LGDS(0.0769)DEEDT(0.0769)MS(0.0769)R;
HNQGDSDDDVEETHPMDGNDSDYDPKK	HNQGDS[79.9663]DDDVEETHPMDGNDSDYDPKK	R	E	209	235	27	4	6S(79.9663)	sp|Q9P2K3-2|RCOR3_HUMAN	Q9P2K3-2	RCOR3_HUMAN	RCOR3	Isoform 2 of REST corepressor 3		sp|Q9P2K3-3|RCOR3_HUMAN, sp|Q9P2K3-4|RCOR3_HUMAN, sp|Q9P2K3|RCOR3_HUMAN	1	0	MS/MS	STY:79.9663@HNQGDS(0.6845)DDDVEET(0.0821)HPMDGNDS(0.0821)DY(0.1513)DPKK;
HQDGLPYIDDSPSSSPHLSSK	HQDGLPY[79.9663]IDDS[79.9663]PSSSPHLSSK	R	G	449	469	21	3	11S(79.9663),7Y(79.9663)	sp|P11274-2|BCR_HUMAN	P11274-2	BCR_HUMAN	BCR	Isoform 2 of Breakpoint cluster region protein		sp|P11274|BCR_HUMAN	1	0	MS/MS	STY:79.9663@HQDGLPY(0.2857)IDDS(0.2857)PS(0.2857)S(0.2857)S(0.2857)PHLS(0.2857)S(0.2857)K;
HRAEAPPLEREDSGTFSLGK	HRAEAPPLEREDSGT[79.9663]FSLGK	R	M	6	25	20	4	15T(79.9663)	sp|O75569|PRKRA_HUMAN	O75569	PRKRA_HUMAN	PRKRA	Interferon-inducible double-stranded RNA-dependent protein kinase activator A			1	4.31776e+06	MS/MS	STY:79.9663@HRAEAPPLEREDS(0.0374)GT(0.4813)FS(0.4813)LGK;
HRPSPPATPPPK	HRPS[79.9663]PPAT[79.9663]PPPK	R	T	399	410	12	2,3	4S(79.9663),8T(79.9663)	sp|Q8IYB3|SRRM1_HUMAN	Q8IYB3	SRRM1_HUMAN	SRRM1	Serine/arginine repetitive matrix protein 1			19	2.7216876E7	MS/MS	STY:79.9663@HRPS(1.0000)PPAT(1.0000)PPPK;
HSCSGSSPPR	HSC[57.0215]SGSS[79.9663]PPR	R	V	889	898	10	2	3C(57.0215),7S(79.9663)	sp|Q9UQ35|SRRM2_HUMAN	Q9UQ35	SRRM2_HUMAN	SRRM2	Serine/arginine repetitive matrix protein 2		sp|Q9UQ35-2|SRRM2_HUMAN	1	2.01648e+06	MS/MS	STY:79.9663@HS(0.0279)CS(0.0279)GS(0.0279)S(0.9162)PPR;
HSLDSDEEEDDDDGGSSK	HSLDS[79.9663]DEEEDDDDGGSSK	K	Y	45	62	18	2	5S(79.9663)	sp|O95400|CD2B2_HUMAN	O95400	CD2B2_HUMAN	CD2BP2	CD2 antigen cytoplasmic tail-binding protein 2			1	3472148	MS/MS	STY:79.9663@HS(0.1810)LDS(0.7037)DEEEDDDDGGS(0.0740)S(0.0413)K;
HSQPSPEPHSPTEPPAWGSSIVK	HSQPS[79.9663]PEPHSPTEPPAWGSSIVK	K	V	964	986	23	3	5S(79.9663)	sp|Q5VZ89-3|DEN4C_HUMAN	Q5VZ89-3	DEN4C_HUMAN	DENND4C	Isoform 3 of DENN domain-containing protein 4C		sp|Q5VZ89-5|DEN4C_HUMAN, sp|Q5VZ89-7|DEN4C_HUMAN, sp|Q5VZ89|DEN4C_HUMAN	1	2.42244e+06	MS/MS	STY:79.9663@HS(0.0068)QPS(0.1986)PEPHS(0.1986)PT(0.1986)EPPAWGS(0.1986)S(0.1986)IVK;
HSSNPPLESHVGWVMDSR	HSS[79.9663]NPPLESHVGWVMDSR	R	E	822	839	18	3	3S(79.9663)	sp|Q6PKG0|LARP1_HUMAN	Q6PKG0	LARP1_HUMAN	LARP1	La-related protein 1		sp|Q6PKG0-3|LARP1_HUMAN	1	2.87259e+06	MS/MS	STY:79.9663@HS(0.0324)S(0.8252)NPPLES(0.1193)HVGWVMDS(0.0231)R;
HSTPSNSSNPSGPPSPNSPHR	HSTPSNSSNPSGPPS[79.9663]PNSPHR	K	S	1676	1696	21	3	15S(79.9663)	sp|Q9Y5S2|MRCKB_HUMAN	Q9Y5S2	MRCKB_HUMAN	CDC42BPB	Serine/threonine-protein kinase MRCK beta			1	1.37035e+06	MS/MS	STY:79.9663@HS(0.0119)T(0.0119)PS(0.0119)NS(0.0145)S(0.0145)NPS(0.0145)GPPS(0.4603)PNS(0.4603)PHR;
HSTSPSLDSEYNEELNEDDSQSDEK	HSTSPSLDSEYNEELNEDDS[79.9663]QSDEK	R	D	1084	1108	25	3	20S(79.9663)	sp|P35251-2|RFC1_HUMAN	P35251-2	RFC1_HUMAN	RFC1	Isoform 2 of Replication factor C subunit 1		sp|P35251|RFC1_HUMAN	1	1.33391e+06	MS/MS	STY:79.9663@HS(0.0693)T(0.0693)S(0.0693)PS(0.1535)LDS(0.1535)EY(0.1535)NEELNEDDS(0.1657)QS(0.1657)DEK;
HSVTAATPPPSPTSGESGDLLSNLLQSPSSAK	HSVT[79.9663]AATPPPSPTSGESGDLLSNLLQSPS[79.9663]SAK	K	L	184	215	32	3	29S(79.9663),4T(79.9663)	sp|Q96QU8-2|XPO6_HUMAN	Q96QU8-2	XPO6_HUMAN	XPO6	Isoform 2 of Exportin-6		sp|Q96QU8|XPO6_HUMAN	1	4542528	MS/MS	STY:79.9663@HS(0.0099)VT(0.5438)AAT(0.2425)PPPS(0.2425)PT(0.0101)S(0.0101)GES(0.0111)GDLLS(0.0148)NLLQS(0.0344)PS(0.4405)S(0.4405)AK;
HSCSGSSPPRVK	HS[79.9663]C[57.0215]SGSSPPRVK	R	S	889	900	12	3	2S(79.9663),3C(57.0215)	sp|Q9UQ35|SRRM2_HUMAN	Q9UQ35	SRRM2_HUMAN	SRRM2	Serine/arginine repetitive matrix protein 2		sp|Q9UQ35-2|SRRM2_HUMAN	1	1.0245e+06	MS/MS	STY:79.9663@HS(0.4243)CS(0.4243)GS(0.0757)S(0.0757)PPRVK;
HSLDSDEEEDDDDGGSSK	HS[79.9663]LDSDEEEDDDDGGSSK	K	Y	45	62	18	2,3	2S(79.9663)	sp|O95400|CD2B2_HUMAN	O95400	CD2B2_HUMAN	CD2BP2	CD2 antigen cytoplasmic tail-binding protein 2			2	3472148	MS/MS	STY:79.9663@HS(0.3549)LDS(0.3549)DEEEDDDDGGS(0.1451)S(0.1451)K;
HSLDSDEEEDDDDGGSSKYDILASEDVEGQEAATLPSEGGVR	HS[79.9663]LDSDEEEDDDDGGSSKYDILASEDVEGQEAATLPSEGGVR	K	I	45	86	42	4	2S(79.9663)	sp|O95400|CD2B2_HUMAN	O95400	CD2B2_HUMAN	CD2BP2	CD2 antigen cytoplasmic tail-binding protein 2			1	2.68598e+06	MS/MS	STY:79.9663@HS(0.1955)LDS(0.1955)DEEEDDDDGGS(0.1955)S(0.1955)KY(0.1955)DILAS(0.0152)EDVEGQEAAT(0.0037)LPS(0.0037)EGGVR;
HSPTSEPTPPGDALPPVSSPHTHR	HS[79.9663]PT[79.9663]SEPTPPGDALPPVSSPHTHR	K	G	74	97	24	3	2S(79.9663),4T(79.9663)	sp|Q9H6S3-2|ES8L2_HUMAN	Q9H6S3-2	ES8L2_HUMAN	EPS8L2	Isoform 2 of Epidermal growth factor receptor kinase substrate 8-like protein 2		sp|Q9H6S3-3|ES8L2_HUMAN, sp|Q9H6S3|ES8L2_HUMAN	1	604784	MS/MS	STY:79.9663@HS(0.2857)PT(0.2857)S(0.2857)EPT(0.2857)PPGDALPPVS(0.2857)S(0.2857)PHT(0.2857)HR;
HSQPSPEPHSPTEPPAWGSSIVK	HS[79.9663]QPSPEPHSPTEPPAWGSSIVK	K	V	964	986	23	3	2S(79.9663)	sp|Q5VZ89-3|DEN4C_HUMAN	Q5VZ89-3	DEN4C_HUMAN	DENND4C	Isoform 3 of DENN domain-containing protein 4C		sp|Q5VZ89-5|DEN4C_HUMAN, sp|Q5VZ89-7|DEN4C_HUMAN, sp|Q5VZ89|DEN4C_HUMAN	1	2.42244e+06	MS/MS	STY:79.9663@HS(0.2459)QPS(0.2459)PEPHS(0.2459)PT(0.2459)EPPAWGS(0.0081)S(0.0081)IVK;
HSQPSPEPHSPTEPPAWGSSIVK	HS[79.9663]QPS[79.9663]PEPHSPTEPPAWGSSIVK	K	V	964	986	23	3	2S(79.9663),5S(79.9663)	sp|Q5VZ89-3|DEN4C_HUMAN	Q5VZ89-3	DEN4C_HUMAN	DENND4C	Isoform 3 of DENN domain-containing protein 4C		sp|Q5VZ89-5|DEN4C_HUMAN, sp|Q5VZ89-7|DEN4C_HUMAN, sp|Q5VZ89|DEN4C_HUMAN	2	2351453	MS/MS	STY:79.9663@HS(0.5204)QPS(0.5204)PEPHS(0.5204)PT(0.1462)EPPAWGS(0.1462)S(0.1462)IVK;
HSSNPPLESHVGWVMDSR	HS[79.9663]SNPPLESHVGWVMDSR	R	E	822	839	18	3	2S(79.9663)	sp|Q6PKG0|LARP1_HUMAN	Q6PKG0	LARP1_HUMAN	LARP1	La-related protein 1		sp|Q6PKG0-3|LARP1_HUMAN	1	2.94602e+06	MS/MS	STY:79.9663@HS(0.3276)S(0.3276)NPPLES(0.3276)HVGWVMDS(0.0173)R;
HSSYPAGTEDDEGMGEEPSPFR	HS[79.9663]SYPAGTEDDEGMGEEPSPFR	R	G	73	94	22	3	2S(79.9663)	sp|Q92934|BAD_HUMAN	Q92934	BAD_HUMAN	BAD	Bcl2-associated agonist of cell death			3	3.17872e+06	MS/MS	STY:79.9663@HS(0.2482)S(0.2482)Y(0.2482)PAGT(0.2482)EDDEGMGEEPS(0.0072)PFR;
HSSISPVRLPLNSSLGAELSR	HS[79.9663]S[79.9663]ISPVRLPLNSSLGAELSR	R	K	381	401	21	3	2S(79.9663),3S(79.9663)	sp|Q9NYV4-2|CDK12_HUMAN	Q9NYV4-2	CDK12_HUMAN	CDK12	Isoform 2 of Cyclin-dependent kinase 12		sp|Q9NYV4-3|CDK12_HUMAN, sp|Q9NYV4|CDK12_HUMAN	1	4746109	MS/MS	STY:79.9663@HS(0.3333)S(0.3333)IS(0.3333)PVRLPLNS(0.3333)S(0.3333)LGAELS(0.3333)R;
HTGPNSPDTANDGFVR	HTGPNSPDT[79.9663]ANDGFVR	K	L	99	114	16	2	9T(79.9663)	sp|P31943|HNRH1_HUMAN	P31943	HNRH1_HUMAN	HNRNPH1	Heterogeneous nuclear ribonucleoprotein H	HNRNPH2	sp|P55795|HNRH2_HUMAN	1	1.50294E7	MS/MS	STY:79.9663@HT(0.2000)GPNS(0.2904)PDT(0.5096)ANDGFVR;
HTLGDSDNES	HTLGDS[79.9663]DNES	K	-	174	183	10	2	6S(79.9663)	sp|P02794|FRIH_HUMAN	P02794	FRIH_HUMAN	FTH1	Ferritin heavy chain			3	1.5731606E7	MS/MS	STY:79.9663@HT(0.1234)LGDS(0.7431)DNES(0.1335);
HTGPNSPDTANDGFVR	HT[79.9663]GPNSPDTANDGFVR	K	L	99	114	16	2	2T(79.9663)	sp|P31943|HNRH1_HUMAN	P31943	HNRH1_HUMAN	HNRNPH1	Heterogeneous nuclear ribonucleoprotein H	HNRNPH2	sp|P55795|HNRH2_HUMAN	2	1.50294E7	MS/MS	STY:79.9663@HT(0.3333)GPNS(0.3333)PDT(0.3333)ANDGFVR;
HTLGDSDNES	HT[79.9663]LGDSDNES	K	-	174	183	10	2	2T(79.9663)	sp|P02794|FRIH_HUMAN	P02794	FRIH_HUMAN	FTH1	Ferritin heavy chain			1	9867829	MS/MS	STY:79.9663@HT(0.4904)LGDS(0.4904)DNES(0.0192);
HVDSLSQRSPK	HVDSLS[79.9663]QRSPK	R	A	59	69	11	2	6S(79.9663)	sp|Q9UHD8-2|SEPT9_HUMAN	Q9UHD8-2	SEPT9_HUMAN	SEPTIN9	Isoform 2 of Septin-9		sp|Q9UHD8-5|SEPT9_HUMAN, sp|Q9UHD8-7|SEPT9_HUMAN, sp|Q9UHD8|SEPT9_HUMAN	1	0	MS/MS	STY:79.9663@HVDS(0.1167)LS(0.4416)QRS(0.4416)PK;
HVDSLSQRSPK	HVDS[79.9663]LSQRSPK	R	A	59	69	11	3	4S(79.9663)	sp|Q9UHD8-2|SEPT9_HUMAN	Q9UHD8-2	SEPT9_HUMAN	SEPTIN9	Isoform 2 of Septin-9		sp|Q9UHD8-5|SEPT9_HUMAN, sp|Q9UHD8-7|SEPT9_HUMAN, sp|Q9UHD8|SEPT9_HUMAN	1	4.95762e+06	MS/MS	STY:79.9663@HVDS(0.3333)LS(0.3333)QRS(0.3333)PK;
HVTLPSSPR	HVTLPSS[79.9663]PR	R	S	2713	2721	9	2	7S(79.9663)	sp|Q5T4S7-2|UBR4_HUMAN	Q5T4S7-2	UBR4_HUMAN	UBR4	Isoform 2 of E3 ubiquitin-protein ligase UBR4		sp|Q5T4S7-3|UBR4_HUMAN, sp|Q5T4S7-4|UBR4_HUMAN, sp|Q5T4S7|UBR4_HUMAN	1	1.94057e+06	MS/MS	STY:79.9663@HVT(0.1923)LPS(0.1923)S(0.6154)PR;
IAAPELHKGDSDSEEDEPTK	IAAPELHKGDSDS[79.9663]EEDEPTK	K	K	147	166	20	3	13S(79.9663)	sp|Q92733|PRCC_HUMAN	Q92733	PRCC_HUMAN	PRCC	Proline-rich protein PRCC			1	5198573	MS/MS	STY:79.9663@IAAPELHKGDS(0.0526)DS(0.4737)EEDEPT(0.4737)K;
IAAPELHKGDSDSEEDEPTK	IAAPELHKGDS[79.9663]DSEEDEPTK	K	K	147	166	20	3	11S(79.9663)	sp|Q92733|PRCC_HUMAN	Q92733	PRCC_HUMAN	PRCC	Proline-rich protein PRCC			1	5198573	MS/MS	STY:79.9663@IAAPELHKGDS(0.3333)DS(0.3333)EEDEPT(0.3333)K;
IAAPELHKGDSDSEEDEPTK	IAAPELHKGDS[79.9663]DS[79.9663]EEDEPTK	K	K	147	166	20	3	11S(79.9663),13S(79.9663)	sp|Q92733|PRCC_HUMAN	Q92733	PRCC_HUMAN	PRCC	Proline-rich protein PRCC			2	6.04184e+06	MS/MS	STY:79.9663@IAAPELHKGDS(0.6771)DS(0.6771)EEDEPT(0.6459)K;
IACDEEFSDSEDEGEGGRR	IAC[57.0215]DEEFS[79.9663]DS[79.9663]EDEGEGGRR	R	N	385	403	19	2,3	10S(79.9663),3C(57.0215),8S(79.9663)	sp|Q92769-3|HDAC2_HUMAN	Q92769-3	HDAC2_HUMAN	HDAC2	Isoform 2 of Histone deacetylase 2		sp|Q92769|HDAC2_HUMAN	3	6511591	MS/MS	STY:79.9663@IACDEEFS(1.0000)DS(1.0000)EDEGEGGRR;
IACEEEFSDSEEEGEGGRK	IAC[57.0215]EEEFS[79.9663]DS[79.9663]EEEGEGGRK	R	N	414	432	19	2,3	10S(79.9663),3C(57.0215),8S(79.9663)	sp|Q13547|HDAC1_HUMAN	Q13547	HDAC1_HUMAN	HDAC1	Histone deacetylase 1			5	1.945703E7	MS/MS	STY:79.9663@IACEEEFS(1.0000)DS(1.0000)EEEGEGGRK;
IAKEEESEDESNEEEEEEDEEESESEAK	IAKEEES[79.9663]EDESNEEEEEEDEEES[79.9663]ES[79.9663]EAK	K	S	1488	1515	28	3	23S(79.9663),25S(79.9663),7S(79.9663)	sp|P51531-2|SMCA2_HUMAN	P51531-2	SMCA2_HUMAN	SMARCA2	Isoform Short of Probable global transcription activator SNF2L2		sp|P51531|SMCA2_HUMAN	1	0	MS/MS	STY:79.9663@IAKEEES(0.7420)EDES(0.7420)NEEEEEEDEEES(0.7580)ES(0.7580)EAK;
IALESEGRPEEQMESDNCSGGDDDWTHLSSK	IALESEGRPEEQMESDNC[57.0215]SGGDDDWTHLSS[79.9663]K	K	E	314	344	31	4	18C(57.0215),30S(79.9663)	sp|Q13501|SQSTM_HUMAN	Q13501	SQSTM_HUMAN	SQSTM1	Sequestosome-1		sp|Q13501-2|SQSTM_HUMAN	1	5.1779e+06	MS/MS	STY:79.9663@IALES(0.2422)EGRPEEQMES(0.2422)DNCS(0.2422)GGDDDWT(0.0100)HLS(0.0120)S(0.2515)K;
IALESEGRPEEQMESDNCSGGDDDWTHLSSK	IALESEGRPEEQMESDNC[57.0215]SGGDDDWT[79.9663]HLSSK	K	E	314	344	31	3	18C(57.0215),26T(79.9663)	sp|Q13501|SQSTM_HUMAN	Q13501	SQSTM_HUMAN	SQSTM1	Sequestosome-1		sp|Q13501-2|SQSTM_HUMAN	1	8691883	MS/MS	STY:79.9663@IALES(0.0080)EGRPEEQMES(0.0140)DNCS(0.0140)GGDDDWT(0.3213)HLS(0.3213)S(0.3213)K;
IALESEGRPEEQMESDNCSGGDDDWTHLSSK	IALESEGRPEEQMESDNC[57.0215]S[79.9663]GGDDDWTHLSSK	K	E	314	344	31	3	18C(57.0215),19S(79.9663)	sp|Q13501|SQSTM_HUMAN	Q13501	SQSTM_HUMAN	SQSTM1	Sequestosome-1		sp|Q13501-2|SQSTM_HUMAN	1	5893077	MS/MS	STY:79.9663@IALES(0.0106)EGRPEEQMES(0.0153)DNCS(0.4142)GGDDDWT(0.4142)HLS(0.0728)S(0.0728)K;
IALESEGRPEEQMESDNCSGGDDDWTHLSSK	IALESEGRPEEQMES[79.9663]DNC[57.0215]SGGDDDWTHLSSK	K	E	314	344	31	4	15S(79.9663),18C(57.0215)	sp|Q13501|SQSTM_HUMAN	Q13501	SQSTM_HUMAN	SQSTM1	Sequestosome-1		sp|Q13501-2|SQSTM_HUMAN	1	5.1779e+06	MS/MS	STY:79.9663@IALES(0.0268)EGRPEEQMES(0.1946)DNCS(0.1946)GGDDDWT(0.1946)HLS(0.1946)S(0.1946)K;
IALESEGRPEEQMESDNCSGGDDDWTHLSSK	IALESEGRPEEQMES[79.9663]DNC[57.0215]S[79.9663]GGDDDWTHLSSK	K	E	314	344	31	3	15S(79.9663),18C(57.0215),19S(79.9663)	sp|Q13501|SQSTM_HUMAN	Q13501	SQSTM_HUMAN	SQSTM1	Sequestosome-1		sp|Q13501-2|SQSTM_HUMAN	2	4.15805e+06	MS/MS	STY:79.9663@IALES(0.2196)EGRPEEQMES(0.7326)DNCS(0.7326)GGDDDWT(0.1050)HLS(0.1050)S(0.1050)K;
IALESEGRPEEQMESDNCSGGDDDWTHLSSK	IALES[79.9663]EGRPEEQMESDNC[57.0215]SGGDDDWTHLSSK	K	E	314	344	31	3	18C(57.0215),5S(79.9663)	sp|Q13501|SQSTM_HUMAN	Q13501	SQSTM_HUMAN	SQSTM1	Sequestosome-1		sp|Q13501-2|SQSTM_HUMAN	1	8573966	MS/MS	STY:79.9663@IALES(0.2844)EGRPEEQMES(0.2844)DNCS(0.2844)GGDDDWT(0.0490)HLS(0.0490)S(0.0490)K;
IALESEGRPEEQMESDNCSGGDDDWTHLSSK	IALES[79.9663]EGRPEEQMES[79.9663]DNC[57.0215]SGGDDDWTHLSSK	K	E	314	344	31	3	15S(79.9663),18C(57.0215),5S(79.9663)	sp|Q13501|SQSTM_HUMAN	Q13501	SQSTM_HUMAN	SQSTM1	Sequestosome-1		sp|Q13501-2|SQSTM_HUMAN	1	0	MS/MS	STY:79.9663@IALES(0.7786)EGRPEEQMES(0.7786)DNCS(0.0553)GGDDDWT(0.1292)HLS(0.1292)S(0.1292)K;
IASDEEIQGTK	IASDEEIQGT[79.9663]K	R	D	509	519	11	2	10T(79.9663)	sp|Q8WX93-3|PALLD_HUMAN	Q8WX93-3	PALLD_HUMAN	PALLD	Isoform 3 of Palladin		sp|Q8WX93-2|PALLD_HUMAN, sp|Q8WX93-4|PALLD_HUMAN, sp|Q8WX93-5|PALLD_HUMAN, sp|Q8WX93-8|PALLD_HUMAN, sp|Q8WX93-9|PALLD_HUMAN, sp|Q8WX93|PALLD_HUMAN	1	7610170	MS/MS	STY:79.9663@IAS(0.0806)DEEIQGT(0.9194)K;
IASDEEIQGTK	IAS[79.9663]DEEIQGTK	R	D	509	519	11	2	3S(79.9663)	sp|Q8WX93-3|PALLD_HUMAN	Q8WX93-3	PALLD_HUMAN	PALLD	Isoform 3 of Palladin		sp|Q8WX93-2|PALLD_HUMAN, sp|Q8WX93-4|PALLD_HUMAN, sp|Q8WX93-5|PALLD_HUMAN, sp|Q8WX93-8|PALLD_HUMAN, sp|Q8WX93-9|PALLD_HUMAN, sp|Q8WX93|PALLD_HUMAN	2	7610170	MS/MS	STY:79.9663@IAS(0.8945)DEEIQGT(0.1055)K;
IDASKNEEDEGHSNSSPR	IDASKNEEDEGHS[79.9663]NSSPR	K	H	68	85	18	3	13S(79.9663)	sp|Q14103-3|HNRPD_HUMAN	Q14103-3	HNRPD_HUMAN	HNRNPD	Isoform 3 of Heterogeneous nuclear ribonucleoprotein D0		sp|Q14103|HNRPD_HUMAN	1	7.22587e+06	MS/MS	STY:79.9663@IDAS(0.0185)KNEEDEGHS(0.3272)NS(0.3272)S(0.3272)PR;
IDDRDSDEEGASDR	IDDRDS[79.9663]DEEGASDR	K	R	777	790	14	2	6S(79.9663)	sp|Q8TDD1-2|DDX54_HUMAN	Q8TDD1-2	DDX54_HUMAN	DDX54	Isoform 2 of ATP-dependent RNA helicase DDX54		sp|Q8TDD1|DDX54_HUMAN	1	0	MS/MS	STY:79.9663@IDDRDS(0.8992)DEEGAS(0.1008)DR;
IDEDGENTQIEDTEPMSPVLNSK	IDEDGENTQIEDT[79.9663]EPMSPVLNSK	R	F	541	563	23	3	13T(79.9663)	sp|Q12888-2|TP53B_HUMAN	Q12888-2	TP53B_HUMAN	TP53BP1	Isoform 2 of TP53-binding protein 1		sp|Q12888-3|TP53B_HUMAN, sp|Q12888|TP53B_HUMAN	1	3083024	MS/MS	STY:79.9663@IDEDGENT(0.0605)QIEDT(0.8016)EPMS(0.0690)PVLNS(0.0690)K;
IDENSDKEMEVEESPEK	IDENS[79.9663]DKEMEVEESPEK	K	I	497	513	17	2	5S(79.9663)	sp|Q8N3X1-2|FNBP4_HUMAN	Q8N3X1-2	FNBP4_HUMAN	FNBP4	Isoform 2 of Formin-binding protein 4		sp|Q8N3X1|FNBP4_HUMAN	1	0	MS/MS	STY:79.9663@IDENS(0.9109)DKEMEVEES(0.0891)PEK;
IDENSDKEMEVEESPEK	IDENS[79.9663]DKEMEVEES[79.9663]PEK	K	I	497	513	17	2,3	14S(79.9663),5S(79.9663)	sp|Q8N3X1-2|FNBP4_HUMAN	Q8N3X1-2	FNBP4_HUMAN	FNBP4	Isoform 2 of Formin-binding protein 4		sp|Q8N3X1|FNBP4_HUMAN	2	0	MS/MS	STY:79.9663@IDENS(1.0000)DKEMEVEES(1.0000)PEK;
IDEPSTPYHSMMGDDEDACSDTEATEAMAPDILAR	IDEPSTPYHSMMGDDEDAC[57.0215]S[79.9663]DTEATEAMAPDILAR	K	K	68	102	35	3	19C(57.0215),20S(79.9663)	sp|P41236|IPP2_HUMAN	P41236	IPP2_HUMAN	PPP1R2	Protein phosphatase inhibitor 2			2	0	MS/MS	STY:79.9663@IDEPS(0.0092)T(0.0092)PY(0.0098)HS(0.0106)MMGDDEDACS(0.4765)DT(0.4765)EAT(0.0083)EAMAPDILAR;
IDEPSTPYHSMMGDDEDACSDTEATEAMAPDILAR	IDEPSTPYHSMMGDDEDAC[57.0215]S[79.9663]DTEATEAM[15.9949]APDILAR	K	K	68	102	35	3	19C(57.0215),20S(79.9663),28M(15.9949)	sp|P41236|IPP2_HUMAN	P41236	IPP2_HUMAN	PPP1R2	Protein phosphatase inhibitor 2			1	7032152	MS/MS	STY:79.9663@IDEPS(0.0639)T(0.0639)PY(0.0639)HS(0.0639)MMGDDEDACS(0.2482)DT(0.2482)EAT(0.2482)EAMAPDILAR;M:15.9949@IDEPSTPYHSM(0.0893)M(0.0893)GDDEDACSDTEATEAM(0.8214)APDILAR;
IDEPSTPYHSMMGDDEDACSDTEATEAMAPDILAR	IDEPSTPYHS[79.9663]M[15.9949]MGDDEDAC[57.0215]SDTEATEAMAPDILAR	K	K	68	102	35	3	10S(79.9663),11M(15.9949),19C(57.0215)	sp|P41236|IPP2_HUMAN	P41236	IPP2_HUMAN	PPP1R2	Protein phosphatase inhibitor 2			1	7032152	MS/MS	STY:79.9663@IDEPS(0.0116)T(0.0116)PY(0.0116)HS(0.3861)MMGDDEDACS(0.3861)DT(0.0965)EAT(0.0965)EAMAPDILAR;M:15.9949@IDEPSTPYHSM(0.3714)M(0.3714)GDDEDACSDTEATEAM(0.2572)APDILAR;
IDEPSTPYHSMMGDDEDACSDTEATEAMAPDILAR	IDEPS[79.9663]TPYHSMMGDDEDAC[57.0215]SDTEATEAM[15.9949]APDILAR	K	K	68	102	35	3	19C(57.0215),28M(15.9949),5S(79.9663)	sp|P41236|IPP2_HUMAN	P41236	IPP2_HUMAN	PPP1R2	Protein phosphatase inhibitor 2			1	0	MS/MS	STY:79.9663@IDEPS(0.1558)T(0.1558)PY(0.1558)HS(0.1558)MMGDDEDACS(0.1558)DT(0.1105)EAT(0.1105)EAMAPDILAR;M:15.9949@IDEPSTPYHSM(0.3056)M(0.3056)GDDEDACSDTEATEAM(0.3888)APDILAR;
IDGATQSSPAEPK	IDGATQS[79.9663]SPAEPK	K	S	683	695	13	2	7S(79.9663)	sp|Q32MZ4-2|LRRF1_HUMAN	Q32MZ4-2	LRRF1_HUMAN	LRRFIP1	Isoform 2 of Leucine-rich repeat flightless-interacting protein 1		sp|Q32MZ4-3|LRRF1_HUMAN, sp|Q32MZ4|LRRF1_HUMAN	1	0	MS/MS	STY:79.9663@IDGAT(0.0398)QS(0.4801)S(0.4801)PAEPK;
IDGATQSSPAEPK	IDGAT[79.9663]QSSPAEPK	K	S	683	695	13	2	5T(79.9663)	sp|Q32MZ4-2|LRRF1_HUMAN	Q32MZ4-2	LRRF1_HUMAN	LRRFIP1	Isoform 2 of Leucine-rich repeat flightless-interacting protein 1		sp|Q32MZ4-3|LRRF1_HUMAN, sp|Q32MZ4|LRRF1_HUMAN	1	0	MS/MS	STY:79.9663@IDGAT(0.3333)QS(0.3333)S(0.3333)PAEPK;
IDISPSTFR	IDISPS[79.9663]TFR	R	K	679	687	9	2	6S(79.9663)	sp|Q9Y2W1|TR150_HUMAN	Q9Y2W1	TR150_HUMAN	THRAP3	Thyroid hormone receptor-associated protein 3			1	1.025454E7	MS/MS	STY:79.9663@IDIS(0.1491)PS(0.8158)T(0.0352)FR;
IDISPSTFR	IDIS[79.9663]PSTFR	R	K	679	687	9	2	4S(79.9663)	sp|Q9Y2W1|TR150_HUMAN	Q9Y2W1	TR150_HUMAN	THRAP3	Thyroid hormone receptor-associated protein 3			7	2.7542656E7	MS/MS	STY:79.9663@IDIS(0.9393)PS(0.0303)T(0.0303)FR;
IDISPSTLR	IDIS[79.9663]PSTLR	R	K	653	661	9	2	4S(79.9663)	sp|Q9NYF8-2|BCLF1_HUMAN	Q9NYF8-2	BCLF1_HUMAN	BCLAF1	Isoform 2 of Bcl-2-associated transcription factor 1		sp|Q9NYF8-3|BCLF1_HUMAN, sp|Q9NYF8-4|BCLF1_HUMAN, sp|Q9NYF8|BCLF1_HUMAN	6	1.6993398E7	MS/MS	STY:79.9663@IDIS(0.9338)PS(0.0331)T(0.0331)LR;
IEDVGSDEEDDSGK	IEDVGSDEEDDS[79.9663]GK	K	D	250	263	14	2	12S(79.9663)	sp|P08238|HS90B_HUMAN	P08238	HS90B_HUMAN	HSP90AB1	Heat shock protein HSP 90-beta	HSP90AB2P	sp|Q58FF8|H90B2_HUMAN	5	3.729904E8	MS/MS	STY:79.9663@IEDVGS(0.0916)DEEDDS(0.9084)GK;
IEDVGSDEEDDSGKDKK	IEDVGSDEEDDS[79.9663]GKDKK	K	K	250	266	17	3	12S(79.9663)	sp|P08238|HS90B_HUMAN	P08238	HS90B_HUMAN	HSP90AB1	Heat shock protein HSP 90-beta	HSP90AB2P	sp|Q58FF8|H90B2_HUMAN	1	4.05998e+06	MS/MS	STY:79.9663@IEDVGS(0.3765)DEEDDS(0.6235)GKDKK;
IEDVGSDEEDDSGK	IEDVGS[79.9663]DEEDDSGK	K	D	250	263	14	2	6S(79.9663)	sp|P08238|HS90B_HUMAN	P08238	HS90B_HUMAN	HSP90AB1	Heat shock protein HSP 90-beta	HSP90AB2P	sp|Q58FF8|H90B2_HUMAN	11	3.74460768E8	MS/MS	STY:79.9663@IEDVGS(0.9412)DEEDDS(0.0588)GK;
IEDVGSDEEDDSGKDK	IEDVGS[79.9663]DEEDDSGKDK	K	K	250	265	16	2	6S(79.9663)	sp|P08238|HS90B_HUMAN	P08238	HS90B_HUMAN	HSP90AB1	Heat shock protein HSP 90-beta	HSP90AB2P	sp|Q58FF8|H90B2_HUMAN	2	0	MS/MS	STY:79.9663@IEDVGS(0.8418)DEEDDS(0.1582)GKDK;
IEKFQSEEQQQTEDELQDK	IEKFQSEEQQQT[79.9663]EDELQDK	K	I	45	63	19	3	12T(79.9663)	sp|P02666|CASB_BOVIN	P02666	CASB_BOVIN	CSN2	Beta-casein			1	5.00887e+06	MS/MS	STY:79.9663@IEKFQS(0.1690)EEQQQT(0.8310)EDELQDK;
IEKFQSEEQQQTEDELQDK	IEKFQS[79.9663]EEQQQTEDELQDK	K	I	45	63	19	3	6S(79.9663)	sp|P02666|CASB_BOVIN	P02666	CASB_BOVIN	CSN2	Beta-casein			4	1.5306254E7	MS/MS	STY:79.9663@IEKFQS(0.9283)EEQQQT(0.0717)EDELQDK;
IESPKLER	IES[79.9663]PKLER	K	T	766	773	8	2	3S(79.9663)	sp|Q92598-3|HS105_HUMAN	Q92598-3	HS105_HUMAN	HSPH1	Isoform 3 of Heat shock protein 105 kDa		sp|Q92598-2|HS105_HUMAN, sp|Q92598-4|HS105_HUMAN, sp|Q92598|HS105_HUMAN	2	8711723	MS/MS	STY:79.9663@IES(1.0000)PKLER;
IFDEVMGCFSDSPPQSPTFPEAGHTSLYDEDK	IFDEVMGC[57.0215]FSDSPPQS[79.9663]PT[79.9663]FPEAGHTSLYDEDK	R	V	1190	1221	32	3	16S(79.9663),18T(79.9663),8C(57.0215)	sp|Q13085-2|ACACA_HUMAN	Q13085-2	ACACA_HUMAN	ACACA	Isoform 2 of Acetyl-CoA carboxylase 1		sp|Q13085-3|ACACA_HUMAN, sp|Q13085-4|ACACA_HUMAN, sp|Q13085|ACACA_HUMAN	1	1.109533E7	MS/MS	STY:79.9663@IFDEVMGCFS(0.0491)DS(0.0491)PPQS(0.6827)PT(0.6827)FPEAGHT(0.2074)S(0.2074)LY(0.1216)DEDK;
IFDEVMGCFSDSPPQSPTFPEAGHTSLYDEDK	IFDEVMGC[57.0215]FS[79.9663]DS[79.9663]PPQSPTFPEAGHTSLYDEDK	R	V	1190	1221	32	3	10S(79.9663),12S(79.9663),8C(57.0215)	sp|Q13085-2|ACACA_HUMAN	Q13085-2	ACACA_HUMAN	ACACA	Isoform 2 of Acetyl-CoA carboxylase 1		sp|Q13085-3|ACACA_HUMAN, sp|Q13085-4|ACACA_HUMAN, sp|Q13085|ACACA_HUMAN	1	1.109533E7	MS/MS	STY:79.9663@IFDEVMGCFS(0.4673)DS(0.4673)PPQS(0.4673)PT(0.4673)FPEAGHT(0.0435)S(0.0435)LY(0.0435)DEDK;
IGEGTYGVVYK	IGEGT[79.9663]YGVVYK	K	G	10	20	11	2	5T(79.9663)	sp|P06493-2|CDK1_HUMAN	P06493-2	CDK1_HUMAN	CDK1	Isoform 2 of Cyclin-dependent kinase 1	CDK2, CDK3	sp|P06493|CDK1_HUMAN, sp|P24941-2|CDK2_HUMAN, sp|P24941|CDK2_HUMAN, sp|Q00526|CDK3_HUMAN	2	0	MS/MS	STY:79.9663@IGEGT(0.3333)Y(0.3333)GVVY(0.3333)K;
IGEGTYGVVYK	IGEGT[79.9663]Y[79.9663]GVVYK	K	G	10	20	11	2	5T(79.9663),6Y(79.9663)	sp|P06493-2|CDK1_HUMAN	P06493-2	CDK1_HUMAN	CDK1	Isoform 2 of Cyclin-dependent kinase 1	CDK2, CDK3	sp|P06493|CDK1_HUMAN, sp|P24941-2|CDK2_HUMAN, sp|P24941|CDK2_HUMAN, sp|Q00526|CDK3_HUMAN	1	3.80889e+06	MS/MS	STY:79.9663@IGEGT(0.6847)Y(0.6577)GVVY(0.6577)K;
IHGVNSGSSEGAQPNTENGVPEITDAATDQGPAESPPTSPSSASR	IHGVNSGSSEGAQPNTENGVPEITDAATDQGPAES[79.9663]PPT[79.9663]SPSSASR	R	G	162	206	45	4	35S(79.9663),38T(79.9663)	sp|Q8IWE2|NXP20_HUMAN	Q8IWE2	NXP20_HUMAN	FAM114A1	Protein NOXP20			1	2.6653e+06	MS/MS	STY:79.9663@IHGVNS(0.1416)GS(0.1416)S(0.1416)EGAQPNT(0.1416)ENGVPEIT(0.1066)DAAT(0.1066)DQGPAES(0.5178)PPT(0.5178)S(0.0463)PS(0.0463)S(0.0463)AS(0.0463)R;
IHGVNSGSSEGAQPNTENGVPEITDAATDQGPAESPPTSPSSASR	IHGVNS[79.9663]GS[79.9663]SEGAQPNTENGVPEITDAATDQGPAESPPTSPSSASR	R	G	162	206	45	4	6S(79.9663),8S(79.9663)	sp|Q8IWE2|NXP20_HUMAN	Q8IWE2	NXP20_HUMAN	FAM114A1	Protein NOXP20			1	2.6653e+06	MS/MS	STY:79.9663@IHGVNS(0.1667)GS(0.1667)S(0.1667)EGAQPNT(0.1667)ENGVPEIT(0.1667)DAAT(0.1667)DQGPAES(0.1667)PPT(0.1667)S(0.1667)PS(0.1667)S(0.1667)AS(0.1667)R;
IHRASDPGLPAEEPK	IHRAS[79.9663]DPGLPAEEPK	R	E	1855	1869	15	3	5S(79.9663)	sp|P27708|PYR1_HUMAN	P27708	PYR1_HUMAN	CAD	CAD protein			2	1.04618e+06	MS/MS	STY:79.9663@IHRAS(1.0000)DPGLPAEEPK;
IIPTLEEGLQLPSPTATSQLPLESDAVECLNYQHYK	IIPTLEEGLQLPSPTATSQLPLES[79.9663]DAVEC[57.0215]LNYQHYK	K	G	104	139	36	3	24S(79.9663),29C(57.0215)	sp|P61978-2|HNRPK_HUMAN	P61978-2	HNRPK_HUMAN	HNRNPK	Isoform 2 of Heterogeneous nuclear ribonucleoprotein K		sp|P61978|HNRPK_HUMAN	1	3.3654824E7	MS/MS	STY:79.9663@IIPT(0.0361)LEEGLQLPS(0.1963)PT(0.0748)AT(0.0925)S(0.0997)QLPLES(0.4286)DAVECLNY(0.0360)QHY(0.0360)K;
IIPTLEEGLQLPSPTATSQLPLESDAVECLNYQHYK	IIPTLEEGLQLPSPTAT[79.9663]SQLPLESDAVEC[57.0215]LNYQHYK	K	G	104	139	36	4	17T(79.9663),29C(57.0215)	sp|P61978-2|HNRPK_HUMAN	P61978-2	HNRPK_HUMAN	HNRNPK	Isoform 2 of Heterogeneous nuclear ribonucleoprotein K		sp|P61978|HNRPK_HUMAN	1	2.8074928E7	MS/MS	STY:79.9663@IIPT(0.0153)LEEGLQLPS(0.0482)PT(0.0919)AT(0.2589)S(0.2589)QLPLES(0.0380)DAVECLNY(0.2097)QHY(0.0791)K;
IIPTLEEGLQLPSPTATSQLPLESDAVECLNYQHYK	IIPTLEEGLQLPS[79.9663]PTATSQLPLESDAVEC[57.0215]LNYQHYK	K	G	104	139	36	3	13S(79.9663),29C(57.0215)	sp|P61978-2|HNRPK_HUMAN	P61978-2	HNRPK_HUMAN	HNRNPK	Isoform 2 of Heterogeneous nuclear ribonucleoprotein K		sp|P61978|HNRPK_HUMAN	1	3.3654824E7	MS/MS	STY:79.9663@IIPT(0.0392)LEEGLQLPS(0.2996)PT(0.2996)AT(0.2996)S(0.0323)QLPLES(0.0134)DAVECLNY(0.0082)QHY(0.0082)K;
IIYDSDSESEETLQVK	IIYDS[79.9663]DS[79.9663]ESEETLQVK	R	N	65	80	16	2	5S(79.9663),7S(79.9663)	sp|P35251-2|RFC1_HUMAN	P35251-2	RFC1_HUMAN	RFC1	Isoform 2 of Replication factor C subunit 1		sp|P35251|RFC1_HUMAN	1	7129014	MS/MS	STY:79.9663@IIY(0.0811)DS(0.6620)DS(0.6620)ES(0.3078)EET(0.2871)LQVK;
IIYDSDSESEETLQVK	IIY[79.9663]DSDSESEET[79.9663]LQVK	R	N	65	80	16	2	12T(79.9663),3Y(79.9663)	sp|P35251-2|RFC1_HUMAN	P35251-2	RFC1_HUMAN	RFC1	Isoform 2 of Replication factor C subunit 1		sp|P35251|RFC1_HUMAN	1	7129014	MS/MS	STY:79.9663@IIY(0.4921)DS(0.4921)DS(0.2334)ES(0.2334)EET(0.5491)LQVK;
IKEEVLSESEAENQQAGAAALAPEIVIK	IKEEVLS[79.9663]ESEAENQQAGAAALAPEIVIK	K	V	772	799	28	3	7S(79.9663)	sp|Q9UJX5-3|APC4_HUMAN	Q9UJX5-3	APC4_HUMAN	ANAPC4	Isoform 3 of Anaphase-promoting complex subunit 4		sp|Q9UJX5|APC4_HUMAN	1	0	MS/MS	STY:79.9663@IKEEVLS(0.5000)ES(0.5000)EAENQQAGAAALAPEIVIK;
ILEGDNGMDSDMEEEADDGSK	ILEGDNGMDS[79.9663]DMEEEADDGSK	K	M	49	69	21	2	10S(79.9663)	sp|Q9H8G2-2|CAAP1_HUMAN	Q9H8G2-2	CAAP1_HUMAN	CAAP1	Isoform 2 of Caspase activity and apoptosis inhibitor 1		sp|Q9H8G2|CAAP1_HUMAN	1	0	MS/MS	STY:79.9663@ILEGDNGMDS(0.7525)DMEEEADDGS(0.2475)K;
ILLVDSPGMGNADDEQQEEGTSSK	ILLVDS[79.9663]PGMGNADDEQQEEGTSSK	K	Q	606	629	24	3	6S(79.9663)	sp|Q9UKN8|TF3C4_HUMAN	Q9UKN8	TF3C4_HUMAN	GTF3C4	General transcription factor 3C polypeptide 4			3	3.78599e+06	MS/MS	STY:79.9663@ILLVDS(0.9005)PGMGNADDEQQEEGT(0.0332)S(0.0332)S(0.0332)K;
ILLVDSPGMGNADDEQQEEGTSSK	ILLVDS[79.9663]PGM[15.9949]GNADDEQQEEGTSSK	K	Q	606	629	24	3	6S(79.9663),9M(15.9949)	sp|Q9UKN8|TF3C4_HUMAN	Q9UKN8	TF3C4_HUMAN	GTF3C4	General transcription factor 3C polypeptide 4			1	0	MS/MS	STY:79.9663@ILLVDS(0.8915)PGMGNADDEQQEEGT(0.0476)S(0.0304)S(0.0304)K;M:15.9949@ILLVDSPGM(1.0000)GNADDEQQEEGTSSK;
INHTVILDDPFDDPPDLLIPDRSPEPTREQLDSGR	INHTVILDDPFDDPPDLLIPDRSPEPT[79.9663]REQLDSGR	R	I	156	190	35	4	27T(79.9663)	sp|Q8WUA2|PPIL4_HUMAN	Q8WUA2	PPIL4_HUMAN	PPIL4	Peptidyl-prolyl cis-trans isomerase-like 4			1	8364739	MS/MS	STY:79.9663@INHT(0.0317)VILDDPFDDPPDLLIPDRS(0.0617)PEPT(0.4533)REQLDS(0.4533)GR;
IPMTPTSSFVSPPPPTASPHSNR	IPMTPTSSFVSPPPPT[79.9663]ASPHSNR	K	T	373	395	23	3	16T(79.9663)	sp|Q7Z5L9-2|I2BP2_HUMAN	Q7Z5L9-2	I2BP2_HUMAN	IRF2BP2	Isoform 2 of Interferon regulatory factor 2-binding protein 2		sp|Q7Z5L9|I2BP2_HUMAN	1	1483074	MS/MS	STY:79.9663@IPMT(0.0082)PT(0.0082)S(0.0082)S(0.0082)FVS(0.0082)PPPPT(0.3196)AS(0.3196)PHS(0.3196)NR;
IQEQESSGEEDSDLSPEER	IQEQES[79.9663]S[79.9663]GEEDSDLSPEER	R	E	116	134	19	2	6S(79.9663),7S(79.9663)	sp|P41236|IPP2_HUMAN	P41236	IPP2_HUMAN	PPP1R2	Protein phosphatase inhibitor 2	PPP1R2B	sp|Q6NXS1|IPP2B_HUMAN	3	6986116	MS/MS	STY:79.9663@IQEQES(0.9318)S(0.9318)GEEDS(0.0701)DLS(0.0664)PEER;
IQEQESSGEEDSDLSPEEREK	IQEQES[79.9663]S[79.9663]GEEDSDLSPEEREK	R	K	116	136	21	3	6S(79.9663),7S(79.9663)	sp|P41236|IPP2_HUMAN	P41236	IPP2_HUMAN	PPP1R2	Protein phosphatase inhibitor 2	PPP1R2B	sp|Q6NXS1|IPP2B_HUMAN	2	3813269	MS/MS	STY:79.9663@IQEQES(0.9266)S(0.9266)GEEDS(0.0734)DLS(0.0734)PEEREK;
IQNSDDEERAQGSDEDKLQNSDDDEK	IQNS[79.9663]DDEERAQGS[79.9663]DEDKLQNS[79.9663]DDDEK	K	M	159	184	26	3	13S(79.9663),21S(79.9663),4S(79.9663)	sp|Q8WVC0-2|LEO1_HUMAN	Q8WVC0-2	LEO1_HUMAN	LEO1	Isoform 2 of RNA polymerase-associated protein LEO1		sp|Q8WVC0|LEO1_HUMAN	1	5.73682e+06	MS/MS	STY:79.9663@IQNS(1.0000)DDEERAQGS(1.0000)DEDKLQNS(1.0000)DDDEK;
IRTSPTFR	IRT[79.9663]SPTFR	K	R	40	47	8	2	3T(79.9663)	sp|P62750|RL23A_HUMAN	P62750	RL23A_HUMAN	RPL23A	Large ribosomal subunit protein uL23			1	6939540	MS/MS	STY:79.9663@IRT(0.3333)S(0.3333)PT(0.3333)FR;
ISPLSSPCSSPLQGTPASSLVSK	IS[79.9663]PLSSPC[57.0215]SSPLQGTPASSLVSK	K	I	519	541	23	3	2S(79.9663),8C(57.0215)	sp|Q14432|PDE3A_HUMAN	Q14432	PDE3A_HUMAN	PDE3A	cGMP-inhibited 3',5'-cyclic phosphodiesterase 3A			1	3.18081e+06	MS/MS	STY:79.9663@IS(0.1938)PLS(0.1938)S(0.1938)PCS(0.1938)S(0.1938)PLQGT(0.0086)PAS(0.0086)S(0.0086)LVS(0.0049)K;
IVEPEVVGESDSEVEGDAWR	IVEPEVVGES[79.9663]DSEVEGDAWR	K	M	107	126	20	2	10S(79.9663)	sp|P55081|MFAP1_HUMAN	P55081	MFAP1_HUMAN	MFAP1	Microfibrillar-associated protein 1			1	0	MS/MS	STY:79.9663@IVEPEVVGES(0.8232)DS(0.1768)EVEGDAWR;
IVEPEVVGESDSEVEGDAWR	IVEPEVVGES[79.9663]DS[79.9663]EVEGDAWR	K	M	107	126	20	2	10S(79.9663),12S(79.9663)	sp|P55081|MFAP1_HUMAN	P55081	MFAP1_HUMAN	MFAP1	Microfibrillar-associated protein 1			1	0	MS/MS	STY:79.9663@IVEPEVVGES(1.0000)DS(1.0000)EVEGDAWR;
IVRGDQPAASGDSDDDEPPPLPR	IVRGDQPAAS[79.9663]GDSDDDEPPPLPR	K	L	45	67	23	3	10S(79.9663)	sp|O00264-2|PGRC1_HUMAN	O00264-2	PGRC1_HUMAN	PGRMC1	Isoform 2 of Membrane-associated progesterone receptor component 1		sp|O00264|PGRC1_HUMAN	4	5202399	MS/MS	STY:79.9663@IVRGDQPAAS(0.5000)GDS(0.5000)DDDEPPPLPR;
IYHLPDAESDEDEDFK	IYHLPDAES[79.9663]DEDEDFK	K	E	245	260	16	2,3	9S(79.9663)	sp|Q15019-2|SEPT2_HUMAN	Q15019-2	SEPT2_HUMAN	SEPTIN2	Isoform 2 of Septin-2		sp|Q15019-3|SEPT2_HUMAN, sp|Q15019|SEPT2_HUMAN	8	8.8756688E7	MS/MS	STY:79.9663@IY(0.0614)HLPDAES(0.9386)DEDEDFK;
IYHLPDAESDEDEDFKEQTR	IYHLPDAES[79.9663]DEDEDFKEQTR	K	L	245	264	20	3	9S(79.9663)	sp|Q15019-2|SEPT2_HUMAN	Q15019-2	SEPT2_HUMAN	SEPTIN2	Isoform 2 of Septin-2		sp|Q15019-3|SEPT2_HUMAN, sp|Q15019|SEPT2_HUMAN	1	1.87935e+06	MS/MS	STY:79.9663@IY(0.1105)HLPDAES(0.4448)DEDEDFKEQT(0.4448)R;
IYHLPDAESDEDEDFK	IY[79.9663]HLPDAESDEDEDFK	K	E	245	260	16	2,3	2Y(79.9663)	sp|Q15019-2|SEPT2_HUMAN	Q15019-2	SEPT2_HUMAN	SEPTIN2	Isoform 2 of Septin-2		sp|Q15019-3|SEPT2_HUMAN, sp|Q15019|SEPT2_HUMAN	2	8.8756688E7	MS/MS	STY:79.9663@IY(0.7932)HLPDAES(0.2068)DEDEDFK;
IYHLPDAESDEDEDFKEQTR	IY[79.9663]HLPDAESDEDEDFKEQTR	K	L	245	264	20	3	2Y(79.9663)	sp|Q15019-2|SEPT2_HUMAN	Q15019-2	SEPT2_HUMAN	SEPTIN2	Isoform 2 of Septin-2		sp|Q15019-3|SEPT2_HUMAN, sp|Q15019|SEPT2_HUMAN	3	5729930	MS/MS	STY:79.9663@IY(0.7563)HLPDAES(0.1405)DEDEDFKEQT(0.1033)R;
KAASPSPQSVR	KAAS[79.9663]PS[79.9663]PQSVR	K	R	735	745	11	2	4S(79.9663),6S(79.9663)	sp|Q8IYB3|SRRM1_HUMAN	Q8IYB3	SRRM1_HUMAN	SRRM1	Serine/arginine repetitive matrix protein 1		sp|Q8IYB3-2|SRRM1_HUMAN	1	2.62023e+06	MS/MS	STY:79.9663@KAAS(0.6848)PS(0.6576)PQS(0.6576)VR;
KADRDQSPFSK	KADRDQSPFS[79.9663]K	K	I	681	691	11	2	10S(79.9663)	sp|Q13427|PPIG_HUMAN	Q13427	PPIG_HUMAN	PPIG	Peptidyl-prolyl cis-trans isomerase G			1	0	MS/MS	STY:79.9663@KADRDQS(0.2933)PFS(0.7067)K;
KADTTTPTPTAILAPGSPASPPGSLEPK	KADTTTPTPTAILAPGSPAS[79.9663]PPGS[79.9663]LEPK	R	A	282	309	28	3	20S(79.9663),24S(79.9663)	sp|P25440-2|BRD2_HUMAN	P25440-2	BRD2_HUMAN	BRD2	Isoform 2 of Bromodomain-containing protein 2		sp|P25440-3|BRD2_HUMAN, sp|P25440-4|BRD2_HUMAN, sp|P25440|BRD2_HUMAN	1	2.49909e+06	MS/MS	STY:79.9663@KADT(0.2446)T(0.2446)T(0.2446)PT(0.2446)PT(0.2446)AILAPGS(0.0713)PAS(0.3529)PPGS(0.3529)LEPK;
KADTTTPTPTAILAPGSPASPPGSLEPK	KADTTTPTPT[79.9663]AILAPGS[79.9663]PASPPGSLEPK	R	A	282	309	28	3	10T(79.9663),17S(79.9663)	sp|P25440-2|BRD2_HUMAN	P25440-2	BRD2_HUMAN	BRD2	Isoform 2 of Bromodomain-containing protein 2		sp|P25440-3|BRD2_HUMAN, sp|P25440-4|BRD2_HUMAN, sp|P25440|BRD2_HUMAN	1	2.49909e+06	MS/MS	STY:79.9663@KADT(0.0665)T(0.0665)T(0.0665)PT(0.0665)PT(0.5026)AILAPGS(0.4104)PAS(0.4104)PPGS(0.4104)LEPK;
KAEDSDSEPEPEDNVR	KAEDS[79.9663]DS[79.9663]EPEPEDNVR	R	L	419	434	16	2	5S(79.9663),7S(79.9663)	sp|Q9H0D6-2|XRN2_HUMAN	Q9H0D6-2	XRN2_HUMAN	XRN2	Isoform 2 of 5'-3' exoribonuclease 2		sp|Q9H0D6|XRN2_HUMAN	3	1.4834436E7	MS/MS	STY:79.9663@KAEDS(1.0000)DS(1.0000)EPEPEDNVR;
KAEENAEGGESALGPDGEPIDESSQMSDLPVK	KAEENAEGGESALGPDGEPIDESSQMS[79.9663]DLPVK	K	V	565	596	32	3	27S(79.9663)	sp|P51531-2|SMCA2_HUMAN	P51531-2	SMCA2_HUMAN	SMARCA2	Isoform Short of Probable global transcription activator SNF2L2		sp|P51531|SMCA2_HUMAN	1	1829362	MS/MS	STY:79.9663@KAEENAEGGES(0.0568)ALGPDGEPIDES(0.1343)S(0.1343)QMS(0.6747)DLPVK;
KAEGAATEEEGTPK	KAEGAATEEEGT[79.9663]PK	K	E	25	38	14	2	12T(79.9663)	sp|P80723|BASP1_HUMAN	P80723	BASP1_HUMAN	BASP1	Brain acid soluble protein 1		sp|P80723-2|BASP1_HUMAN	1	0	MS/MS	STY:79.9663@KAEGAAT(0.1156)EEEGT(0.8844)PK;
KAEGAATEEEGTPK	KAEGAAT[79.9663]EEEGTPK	K	E	25	38	14	2	7T(79.9663)	sp|P80723|BASP1_HUMAN	P80723	BASP1_HUMAN	BASP1	Brain acid soluble protein 1		sp|P80723-2|BASP1_HUMAN	1	0	MS/MS	STY:79.9663@KAEGAAT(0.5000)EEEGT(0.5000)PK;
KAEGAATEEEGTPKESEPQAAAEPAEAK	KAEGAAT[79.9663]EEEGTPKESEPQAAAEPAEAK	K	E	25	52	28	3	7T(79.9663)	sp|P80723|BASP1_HUMAN	P80723	BASP1_HUMAN	BASP1	Brain acid soluble protein 1		sp|P80723-2|BASP1_HUMAN	1	1.24579e+06	MS/MS	STY:79.9663@KAEGAAT(0.3333)EEEGT(0.3333)PKES(0.3333)EPQAAAEPAEAK;
KAEGEPQEESPLK	KAEGEPQEES[79.9663]PLK	K	S	166	178	13	2,3	10S(79.9663)	sp|Q9NYF8-2|BCLF1_HUMAN	Q9NYF8-2	BCLF1_HUMAN	BCLAF1	Isoform 2 of Bcl-2-associated transcription factor 1		sp|Q9NYF8-3|BCLF1_HUMAN, sp|Q9NYF8-4|BCLF1_HUMAN, sp|Q9NYF8|BCLF1_HUMAN	9	3.7207176E7	MS/MS	STY:79.9663@KAEGEPQEES(1.0000)PLK;
KAEQGSEEEGEGEEEEEEGGESK	KAEQGS[79.9663]EEEGEGEEEEEEGGESK	K	A	223	245	23	2,3	6S(79.9663)	sp|Q8NE71|ABCF1_HUMAN	Q8NE71	ABCF1_HUMAN	ABCF1	ATP-binding cassette sub-family F member 1			7	1.3140755E7	MS/MS	STY:79.9663@KAEQGS(0.9300)EEEGEGEEEEEEGGES(0.0700)K;
KAPAGQEEPGTPPSSPLSAEQLDR	KAPAGQEEPGTPPSS[79.9663]PLSAEQLDR	K	I	50	73	24	3	15S(79.9663)	sp|P13051|UNG_HUMAN	P13051	UNG_HUMAN	UNG	Uracil-DNA glycosylase		sp|P13051-2|UNG_HUMAN	1	0	MS/MS	STY:79.9663@KAPAGQEEPGT(0.1714)PPS(0.1714)S(0.6295)PLS(0.0278)AEQLDR;
KAPAGQEEPGTPPSSPLSAEQLDR	KAPAGQEEPGT[79.9663]PPSSPLSAEQLDR	K	I	50	73	24	3	11T(79.9663)	sp|P13051|UNG_HUMAN	P13051	UNG_HUMAN	UNG	Uracil-DNA glycosylase		sp|P13051-2|UNG_HUMAN	1	3.22515e+06	MS/MS	STY:79.9663@KAPAGQEEPGT(0.7632)PPS(0.0789)S(0.0789)PLS(0.0789)AEQLDR;
KAPPPPISPTQLSDVSSPR	KAPPPPIS[79.9663]PTQLSDVSSPR	R	S	277	295	19	3	8S(79.9663)	sp|Q9P0K7-2|RAI14_HUMAN	Q9P0K7-2	RAI14_HUMAN	RAI14	Isoform 2 of Ankycorbin		sp|Q9P0K7-3|RAI14_HUMAN, sp|Q9P0K7|RAI14_HUMAN	1	452513	MS/MS	STY:79.9663@KAPPPPIS(0.2000)PT(0.2000)QLS(0.2000)DVS(0.2000)S(0.2000)PR;
KCSLPAEEDSVLEK	KC[57.0215]SLPAEEDS[79.9663]VLEK	K	L	634	647	14	2	10S(79.9663),2C(57.0215)	sp|P27816-6|MAP4_HUMAN	P27816-6	MAP4_HUMAN	MAP4	Isoform 6 of Microtubule-associated protein 4		sp|P27816|MAP4_HUMAN	1	0	MS/MS	STY:79.9663@KCS(0.3148)LPAEEDS(0.6852)VLEK;
KDDSHSAEDSEDEKEDHK	KDDSHSAEDS[79.9663]EDEKEDHK	K	N	70	87	18	3	10S(79.9663)	sp|Q9H1E3|NUCKS_HUMAN	Q9H1E3	NUCKS_HUMAN	NUCKS1	Nuclear ubiquitous casein and cyclin-dependent kinase substrate 1		sp|Q9H1E3-2|NUCKS_HUMAN	1	1.07986e+06	MS/MS	STY:79.9663@KDDS(0.0803)HS(0.1102)AEDS(0.8095)EDEKEDHK;
KDDSHSAEDSEDEKEDHK	KDDSHS[79.9663]AEDSEDEKEDHK	K	N	70	87	18	4	6S(79.9663)	sp|Q9H1E3|NUCKS_HUMAN	Q9H1E3	NUCKS_HUMAN	NUCKS1	Nuclear ubiquitous casein and cyclin-dependent kinase substrate 1		sp|Q9H1E3-2|NUCKS_HUMAN	1	2485565	MS/MS	STY:79.9663@KDDS(0.1269)HS(0.4365)AEDS(0.4365)EDEKEDHK;
KDDSHSAEDSEDEKEDHK	KDDS[79.9663]HSAEDS[79.9663]EDEKEDHK	K	N	70	87	18	3	10S(79.9663),4S(79.9663)	sp|Q9H1E3|NUCKS_HUMAN	Q9H1E3	NUCKS_HUMAN	NUCKS1	Nuclear ubiquitous casein and cyclin-dependent kinase substrate 1		sp|Q9H1E3-2|NUCKS_HUMAN	1	1.2931902E7	MS/MS	STY:79.9663@KDDS(0.6578)HS(0.6578)AEDS(0.6843)EDEKEDHK;
KDDSHSAEDSEDEK	KDDS[79.9663]HS[79.9663]AEDSEDEK	K	E	70	83	14	2	4S(79.9663),6S(79.9663)	sp|Q9H1E3|NUCKS_HUMAN	Q9H1E3	NUCKS_HUMAN	NUCKS1	Nuclear ubiquitous casein and cyclin-dependent kinase substrate 1		sp|Q9H1E3-2|NUCKS_HUMAN	1	0	MS/MS	STY:79.9663@KDDS(0.6667)HS(0.6667)AEDS(0.6667)EDEK;
KDDSHSAEDSEDEKEDHK	KDDS[79.9663]HS[79.9663]AEDS[79.9663]EDEKEDHK	K	N	70	87	18	3	10S(79.9663),4S(79.9663),6S(79.9663)	sp|Q9H1E3|NUCKS_HUMAN	Q9H1E3	NUCKS_HUMAN	NUCKS1	Nuclear ubiquitous casein and cyclin-dependent kinase substrate 1		sp|Q9H1E3-2|NUCKS_HUMAN	2	2.3716944E7	MS/MS	STY:79.9663@KDDS(1.0000)HS(1.0000)AEDS(1.0000)EDEKEDHK;
KDSEEEVSLLGSQDIEEGNHQVEDGCR	KDSEEEVS[79.9663]LLGSQDIEEGNHQVEDGC[57.0215]R	R	E	693	719	27	3	26C(57.0215),8S(79.9663)	sp|Q9Y487|VPP2_HUMAN	Q9Y487	VPP2_HUMAN	ATP6V0A2	V-type proton ATPase 116 kDa subunit a 2			2	0	MS/MS	STY:79.9663@KDS(0.2100)EEEVS(0.6722)LLGS(0.1178)QDIEEGNHQVEDGCR;
KDSEGYSESPDLEFEYADTDK	KDS[79.9663]EGYSESPDLEFEYADTDK	R	W	57	77	21	3	3S(79.9663)	sp|Q5VSL9|STRP1_HUMAN	Q5VSL9	STRP1_HUMAN	STRIP1	Striatin-interacting protein 1		sp|Q5VSL9-4|STRP1_HUMAN	2	2471692	MS/MS	STY:79.9663@KDS(0.2472)EGY(0.2472)S(0.2472)ES(0.2472)PDLEFEY(0.0055)ADT(0.0055)DK;
KEDSDEEEDDDSEEDEEDDEDEDEDEDEIEPAAMK	KEDSDEEEDDDS[79.9663]EEDEEDDEDEDEDEDEIEPAAMK	K	A	142	176	35	3	12S(79.9663)	sp|P19338|NUCL_HUMAN	P19338	NUCL_HUMAN	NCL	Nucleolin			7	2.5542412E7	MS/MS	STY:79.9663@KEDS(0.0988)DEEEDDDS(0.9012)EEDEEDDEDEDEDEDEIEPAAMK;
KEDSDEEEDDDSEEDEEDDEDEDEDEDEIEPAAMK	KEDS[79.9663]DEEEDDDSEEDEEDDEDEDEDEDEIEPAAMK	K	A	142	176	35	3	4S(79.9663)	sp|P19338|NUCL_HUMAN	P19338	NUCL_HUMAN	NCL	Nucleolin			4	2.5542412E7	MS/MS	STY:79.9663@KEDS(0.8668)DEEEDDDS(0.1332)EEDEEDDEDEDEDEDEIEPAAMK;
KEDSDEEEDDDSEEDEEDDEDEDEDEDEIEPAAMK	KEDS[79.9663]DEEEDDDS[79.9663]EEDEEDDEDEDEDEDEIEPAAMK	K	A	142	176	35	3,4,5	12S(79.9663),4S(79.9663)	sp|P19338|NUCL_HUMAN	P19338	NUCL_HUMAN	NCL	Nucleolin			47	7.8240141E8	MS/MS	STY:79.9663@KEDS(1.0000)DEEEDDDS(1.0000)EEDEEDDEDEDEDEDEIEPAAMK;
KEDSDEEEDDDSEEDEEDDEDEDEDEDEIEPAAMK	KEDS[79.9663]DEEEDDDS[79.9663]EEDEEDDEDEDEDEDEIEPAAM[15.9949]K	K	A	142	176	35	3,4	12S(79.9663),34M(15.9949),4S(79.9663)	sp|P19338|NUCL_HUMAN	P19338	NUCL_HUMAN	NCL	Nucleolin			20	1.64189136E8	MS/MS	STY:79.9663@KEDS(1.0000)DEEEDDDS(1.0000)EEDEEDDEDEDEDEDEIEPAAMK;M:15.9949@KEDSDEEEDDDSEEDEEDDEDEDEDEDEIEPAAM(1.0000)K;
KEESEESDDDMGFGLFD	KEESEES[79.9663]DDDMGFGLFD	K	-	98	114	17	2	7S(79.9663)	sp|P05386|RLA1_HUMAN	P05386	RLA1_HUMAN	RPLP1	Large ribosomal subunit protein P1	RPLP2	sp|P05386-2|RLA1_HUMAN, sp|P05387|RLA2_HUMAN	2	1.44955104E8	MS/MS	STY:79.9663@KEES(0.0608)EES(0.9392)DDDMGFGLFD;
KEESEESDDDMGFGLFD	KEESEES[79.9663]DDDM[15.9949]GFGLFD	K	-	98	114	17	2	11M(15.9949),7S(79.9663)	sp|P05386|RLA1_HUMAN	P05386	RLA1_HUMAN	RPLP1	Large ribosomal subunit protein P1	RPLP2	sp|P05386-2|RLA1_HUMAN, sp|P05387|RLA2_HUMAN	1	2.8270624E7	MS/MS	STY:79.9663@KEES(0.1681)EES(0.8319)DDDMGFGLFD;M:15.9949@KEESEESDDDM(1.0000)GFGLFD;
KEESEESDDDMGFGLFD	KEES[79.9663]EESDDDM[15.9949]GFGLFD	K	-	98	114	17	2	11M(15.9949),4S(79.9663)	sp|P05386|RLA1_HUMAN	P05386	RLA1_HUMAN	RPLP1	Large ribosomal subunit protein P1	RPLP2	sp|P05386-2|RLA1_HUMAN, sp|P05387|RLA2_HUMAN	3	2.8270624E7	MS/MS	STY:79.9663@KEES(0.9315)EES(0.0685)DDDMGFGLFD;M:15.9949@KEESEESDDDM(1.0000)GFGLFD;
KEESEESDDDMGFGLFD	KEES[79.9663]EES[79.9663]DDDMGFGLFD	K	-	98	114	17	2	4S(79.9663),7S(79.9663)	sp|P05386|RLA1_HUMAN	P05386	RLA1_HUMAN	RPLP1	Large ribosomal subunit protein P1	RPLP2	sp|P05386-2|RLA1_HUMAN, sp|P05387|RLA2_HUMAN	9	9.8473792E8	MS/MS	STY:79.9663@KEES(1.0000)EES(1.0000)DDDMGFGLFD;
KEESEESDDDMGFGLFD	KEES[79.9663]EES[79.9663]DDDM[15.9949]GFGLFD	K	-	98	114	17	2	11M(15.9949),4S(79.9663),7S(79.9663)	sp|P05386|RLA1_HUMAN	P05386	RLA1_HUMAN	RPLP1	Large ribosomal subunit protein P1	RPLP2	sp|P05386-2|RLA1_HUMAN, sp|P05387|RLA2_HUMAN	3	7.0437818E8	MS/MS	STY:79.9663@KEES(1.0000)EES(1.0000)DDDMGFGLFD;M:15.9949@KEESEESDDDM(1.0000)GFGLFD;
KEETPGTPK	KEET[79.9663]PGTPK	K	K	152	160	9	2	4T(79.9663)	sp|Q99442|SEC62_HUMAN	Q99442	SEC62_HUMAN	SEC62	Translocation protein SEC62			1	3.21178e+06	MS/MS	STY:79.9663@KEET(0.6588)PGT(0.3412)PK;
KEKTPELPEPSVK	KEKT[79.9663]PELPEPSVK	K	V	217	229	13	3	4T(79.9663)	sp|Q8IYB3|SRRM1_HUMAN	Q8IYB3	SRRM1_HUMAN	SRRM1	Serine/arginine repetitive matrix protein 1		sp|Q8IYB3-2|SRRM1_HUMAN	1	1.4205e+06	MS/MS	STY:79.9663@KEKT(0.8430)PELPEPS(0.1570)VK;
KEPDDSRDEDEDEDESSEEDSEDEEPPPK	KEPDDSRDEDEDEDES[79.9663]S[79.9663]EEDS[79.9663]EDEEPPPK	K	R	388	416	29	3	16S(79.9663),17S(79.9663),21S(79.9663)	sp|Q5SSJ5-2|HP1B3_HUMAN	Q5SSJ5-2	HP1B3_HUMAN	HP1BP3	Isoform 2 of Heterochromatin protein 1-binding protein 3		sp|Q5SSJ5-3|HP1B3_HUMAN, sp|Q5SSJ5|HP1B3_HUMAN	3	2.3149588E7	MS/MS	STY:79.9663@KEPDDS(0.3607)RDEDEDEDES(0.8798)S(0.8798)EEDS(0.8798)EDEEPPPK;
KEPDDSRDEDEDEDESSEEDSEDEEPPPK	KEPDDS[79.9663]RDEDEDEDES[79.9663]S[79.9663]EEDSEDEEPPPK	K	R	388	416	29	3	16S(79.9663),17S(79.9663),6S(79.9663)	sp|Q5SSJ5-2|HP1B3_HUMAN	Q5SSJ5-2	HP1B3_HUMAN	HP1BP3	Isoform 2 of Heterochromatin protein 1-binding protein 3		sp|Q5SSJ5-3|HP1B3_HUMAN, sp|Q5SSJ5|HP1B3_HUMAN	8	1.8974338E7	MS/MS	STY:79.9663@KEPDDS(0.7818)RDEDEDEDES(0.7818)S(0.7818)EEDS(0.6545)EDEEPPPK;
KEQESDEEEEEEEEDEPSGATTR	KEQES[79.9663]DEEEEEEEEDEPSGATTR	K	S	2982	3004	23	3	5S(79.9663)	sp|Q8NFC6|BD1L1_HUMAN	Q8NFC6	BD1L1_HUMAN	BOD1L1	Biorientation of chromosomes in cell division protein 1-like 1			2	1.04614e+06	MS/MS	STY:79.9663@KEQES(0.6139)DEEEEEEEEDEPS(0.1287)GAT(0.1287)T(0.1287)R;
KETESEAEDNLDDLEK	KETES[79.9663]EAEDNLDDLEK	K	H	870	885	16	2	5S(79.9663)	sp|Q8IYB3|SRRM1_HUMAN	Q8IYB3	SRRM1_HUMAN	SRRM1	Serine/arginine repetitive matrix protein 1		sp|Q8IYB3-2|SRRM1_HUMAN	2	2.1129802E7	MS/MS	STY:79.9663@KET(0.0770)ES(0.9230)EAEDNLDDLEK;
KETESEAEDNLDDLEK	KET[79.9663]ESEAEDNLDDLEK	K	H	870	885	16	2,3	3T(79.9663)	sp|Q8IYB3|SRRM1_HUMAN	Q8IYB3	SRRM1_HUMAN	SRRM1	Serine/arginine repetitive matrix protein 1		sp|Q8IYB3-2|SRRM1_HUMAN	4	2.3352136E7	MS/MS	STY:79.9663@KET(0.5000)ES(0.5000)EAEDNLDDLEK;
KETESEAEDNLDDLEK	KET[79.9663]ES[79.9663]EAEDNLDDLEK	K	H	870	885	16	2	3T(79.9663),5S(79.9663)	sp|Q8IYB3|SRRM1_HUMAN	Q8IYB3	SRRM1_HUMAN	SRRM1	Serine/arginine repetitive matrix protein 1		sp|Q8IYB3-2|SRRM1_HUMAN	4	2.8319438E7	MS/MS	STY:79.9663@KET(1.0000)ES(1.0000)EAEDNLDDLEK;
KETPPPLVPPAAR	KET[79.9663]PPPLVPPAAR	R	E	3	15	13	2	3T(79.9663)	sp|Q9BQA1-2|MEP50_HUMAN	Q9BQA1-2	MEP50_HUMAN	WDR77	Isoform 2 of Methylosome protein WDR77		sp|Q9BQA1|MEP50_HUMAN	2	1.12681e+06	MS/MS	STY:79.9663@KET(1.0000)PPPLVPPAAR;
KFDHESSPGTDEDK	KFDHES[79.9663]S[79.9663]PGT[79.9663]DEDK	K	S	739	752	14	2,3	10T(79.9663),6S(79.9663),7S(79.9663)	sp|Q13427|PPIG_HUMAN	Q13427	PPIG_HUMAN	PPIG	Peptidyl-prolyl cis-trans isomerase G			2	1.25641e+06	MS/MS	STY:79.9663@KFDHES(1.0000)S(1.0000)PGT(1.0000)DEDK;
KFPDRLAEDEGDSEPEAVGQSR	KFPDRLAEDEGDSEPEAVGQS[79.9663]R	K	G	1452	1473	22	3	21S(79.9663)	sp|Q9UIG0-2|BAZ1B_HUMAN	Q9UIG0-2	BAZ1B_HUMAN	BAZ1B	Isoform 2 of Tyrosine-protein kinase BAZ1B		sp|Q9UIG0|BAZ1B_HUMAN	2	8655060	MS/MS	STY:79.9663@KFPDRLAEDEGDS(0.1359)EPEAVGQS(0.8641)R;
KFPDRLAEDEGDSEPEAVGQSR	KFPDRLAEDEGDS[79.9663]EPEAVGQSR	K	G	1452	1473	22	3	13S(79.9663)	sp|Q9UIG0-2|BAZ1B_HUMAN	Q9UIG0-2	BAZ1B_HUMAN	BAZ1B	Isoform 2 of Tyrosine-protein kinase BAZ1B		sp|Q9UIG0|BAZ1B_HUMAN	4	8655060	MS/MS	STY:79.9663@KFPDRLAEDEGDS(0.9184)EPEAVGQS(0.0816)R;
KGAGDGSDEEVDGK	KGAGDGS[79.9663]DEEVDGK	R	A	1937	1950	14	2	7S(79.9663)	sp|P35579|MYH9_HUMAN	P35579	MYH9_HUMAN	MYH9	Myosin-9		sp|P35579-2|MYH9_HUMAN	7	9.2577952E7	MS/MS	STY:79.9663@KGAGDGS(1.0000)DEEVDGK;
KGAGDGSDEEVDGKADGAEAK	KGAGDGS[79.9663]DEEVDGKADGAEAK	R	P	1937	1957	21	2,3	7S(79.9663)	sp|P35579|MYH9_HUMAN	P35579	MYH9_HUMAN	MYH9	Myosin-9		sp|P35579-2|MYH9_HUMAN	8	1.5066634E7	MS/MS	STY:79.9663@KGAGDGS(1.0000)DEEVDGKADGAEAK;
KGDVEGSQSQDEGEGSGESER	KGDVEGS[79.9663]QSQDEGEGSGESER	K	G	1059	1079	21	3	7S(79.9663)	sp|Q9UQE7|SMC3_HUMAN	Q9UQE7	SMC3_HUMAN	SMC3	Structural maintenance of chromosomes protein 3			1	0	MS/MS	STY:79.9663@KGDVEGS(0.7401)QS(0.1312)QDEGEGS(0.0644)GES(0.0644)ER;
KGGEFDEFVNDDTDDDLPISK	KGGEFDEFVNDDT[79.9663]DDDLPISK	K	K	913	933	21	3	13T(79.9663)	sp|Q6PD62|CTR9_HUMAN	Q6PD62	CTR9_HUMAN	CTR9	RNA polymerase-associated protein CTR9 homolog			2	4.15017e+06	MS/MS	STY:79.9663@KGGEFDEFVNDDT(0.9375)DDDLPIS(0.0625)K;
KGNAEGSSDEEGKLVIDEPAK	KGNAEGS[79.9663]S[79.9663]DEEGKLVIDEPAK	K	E	119	139	21	3	7S(79.9663),8S(79.9663)	sp|P51858-2|HDGF_HUMAN	P51858-2	HDGF_HUMAN	HDGF	Isoform 2 of Hepatoma-derived growth factor		sp|P51858-3|HDGF_HUMAN, sp|P51858|HDGF_HUMAN	1	3.53952e+06	MS/MS	STY:79.9663@KGNAEGS(1.0000)S(1.0000)DEEGKLVIDEPAK;
KGSITEYTAAEEK	KGS[79.9663]ITEYTAAEEK	R	E	174	186	13	2	3S(79.9663)	sp|Q12982-2|BNIP2_HUMAN	Q12982-2	BNIP2_HUMAN	BNIP2	Isoform 2 of BCL2/adenovirus E1B 19 kDa protein-interacting protein 2		sp|Q12982|BNIP2_HUMAN	3	3.72279e+06	MS/MS	STY:79.9663@KGS(0.9277)IT(0.0259)EY(0.0240)T(0.0224)AAEEK;
KHSPSPPPPTPTESR	KHS[79.9663]PS[79.9663]PPPPTPTESR	R	K	326	340	15	3	3S(79.9663),5S(79.9663)	sp|Q92922|SMRC1_HUMAN	Q92922	SMRC1_HUMAN	SMARCC1	SWI/SNF complex subunit SMARCC1			1	1.78259e+06	MS/MS	STY:79.9663@KHS(0.4913)PS(0.4913)PPPPT(0.3392)PT(0.3392)ES(0.3392)R;
KIEEAMDGSETPQLFTVLPEK	KIEEAM[15.9949]DGS[79.9663]ETPQLFTVLPEK	K	R	770	790	21	3	6M(15.9949),9S(79.9663)	sp|Q13435|SF3B2_HUMAN	Q13435	SF3B2_HUMAN	SF3B2	Splicing factor 3B subunit 2			1	504525	MS/MS	STY:79.9663@KIEEAMDGS(0.3333)ET(0.3333)PQLFT(0.3333)VLPEK;M:15.9949@KIEEAM(1.0000)DGSETPQLFTVLPEK;
KISENSYSLDDLEIGPGQLSSSTFDSEK	KISENSY[79.9663]SLDDLEIGPGQLSSSTFDSEK	R	N	63	90	28	3	7Y(79.9663)	sp|Q9UHB6-2|LIMA1_HUMAN	Q9UHB6-2	LIMA1_HUMAN	LIMA1	Isoform Alpha of LIM domain and actin-binding protein 1		sp|Q9UHB6-4|LIMA1_HUMAN, sp|Q9UHB6-5|LIMA1_HUMAN, sp|Q9UHB6|LIMA1_HUMAN	1	0	MS/MS	STY:79.9663@KIS(0.0057)ENS(0.0062)Y(0.3104)S(0.3104)LDDLEIGPGQLS(0.0734)S(0.0734)S(0.0734)T(0.0734)FDS(0.0734)EK;
KISPPSYAR	KIS[79.9663]PPSYAR	R	R	283	291	9	2	3S(79.9663)	sp|Q8N2M8-3|CLASR_HUMAN	Q8N2M8-3	CLASR_HUMAN	CLASRP	Isoform 2 of CLK4-associating serine/arginine rich protein		sp|Q8N2M8-4|CLASR_HUMAN, sp|Q8N2M8|CLASR_HUMAN	1	2.30225e+06	MS/MS	STY:79.9663@KIS(0.3333)PPS(0.3333)Y(0.3333)AR;
KIVEPEVVGESDSEVEGDAWR	KIVEPEVVGES[79.9663]DSEVEGDAWR	R	M	106	126	21	3	11S(79.9663)	sp|P55081|MFAP1_HUMAN	P55081	MFAP1_HUMAN	MFAP1	Microfibrillar-associated protein 1			1	0	MS/MS	STY:79.9663@KIVEPEVVGES(0.5000)DS(0.5000)EVEGDAWR;
KIVEPEVVGESDSEVEGDAWR	KIVEPEVVGES[79.9663]DS[79.9663]EVEGDAWR	R	M	106	126	21	3	11S(79.9663),13S(79.9663)	sp|P55081|MFAP1_HUMAN	P55081	MFAP1_HUMAN	MFAP1	Microfibrillar-associated protein 1			1	1.18557e+06	MS/MS	STY:79.9663@KIVEPEVVGES(1.0000)DS(1.0000)EVEGDAWR;
KKEPAITSQNSPEAR	KKEPAITSQNS[79.9663]PEAR	K	E	69	83	15	3	11S(79.9663)	sp|P23193-2|TCEA1_HUMAN	P23193-2	TCEA1_HUMAN	TCEA1	Isoform 2 of Transcription elongation factor A protein 1		sp|P23193|TCEA1_HUMAN	2	7.65394e+06	MS/MS	STY:79.9663@KKEPAIT(0.0811)S(0.0811)QNS(0.8379)PEAR;
KKEPAITSQNSPEAR	KKEPAIT[79.9663]SQNSPEAR	K	E	69	83	15	3	7T(79.9663)	sp|P23193-2|TCEA1_HUMAN	P23193-2	TCEA1_HUMAN	TCEA1	Isoform 2 of Transcription elongation factor A protein 1		sp|P23193|TCEA1_HUMAN	2	7.65394e+06	MS/MS	STY:79.9663@KKEPAIT(0.3333)S(0.3333)QNS(0.3333)PEAR;
KKPSTDEQTSSAEEDVPTCGYLNVLSNSR	KKPS[79.9663]T[79.9663]DEQTSSAEEDVPTC[57.0215]GYLNVLSNSR	K	W	333	361	29	3	19C(57.0215),4S(79.9663),5T(79.9663)	sp|Q8N556-2|AFAP1_HUMAN	Q8N556-2	AFAP1_HUMAN	AFAP1	Isoform 2 of Actin filament-associated protein 1		sp|Q8N556|AFAP1_HUMAN	1	3403743	MS/MS	STY:79.9663@KKPS(0.2847)T(0.2847)DEQT(0.2847)S(0.2847)S(0.2847)AEEDVPT(0.2847)CGY(0.2511)LNVLS(0.0203)NS(0.0203)R;
KKSPIINESR	KKS[79.9663]PIINESR	R	S	275	284	10	3	3S(79.9663)	sp|Q13523|PRP4B_HUMAN	Q13523	PRP4B_HUMAN	PRPF4B	Serine/threonine-protein kinase PRP4 homolog			1	1815967	MS/MS	STY:79.9663@KKS(0.6891)PIINES(0.3109)R;
KLEKEEEEGISQESSEEEQ	KLEKEEEEGIS[79.9663]QES[79.9663]SEEEQ	K	-	89	107	19	2	11S(79.9663),14S(79.9663)	sp|P17096|HMGA1_HUMAN	P17096	HMGA1_HUMAN	HMGA1	High mobility group protein HMG-I/HMG-Y		sp|P17096-2|HMGA1_HUMAN	1	4.53407e+06	MS/MS	STY:79.9663@KLEKEEEEGIS(0.6667)QES(0.6667)S(0.6667)EEEQ;
KLENSPLGEALR	KLENS[79.9663]PLGEALR	K	S	104	115	12	2	5S(79.9663)	sp|Q9NX40-2|OCAD1_HUMAN	Q9NX40-2	OCAD1_HUMAN	OCIAD1	Isoform 2 of OCIA domain-containing protein 1		sp|Q9NX40-3|OCAD1_HUMAN, sp|Q9NX40-4|OCAD1_HUMAN, sp|Q9NX40|OCAD1_HUMAN	1	0	MS/MS	STY:79.9663@KLENS(1.0000)PLGEALR;
KLGAGEGGEASVSPEK	KLGAGEGGEAS[79.9663]VSPEK	K	T	1328	1343	16	2	11S(79.9663)	sp|Q13428-6|TCOF_HUMAN	Q13428-6	TCOF_HUMAN	TCOF1	Isoform 6 of Treacle protein		sp|Q13428-2|TCOF_HUMAN, sp|Q13428-3|TCOF_HUMAN, sp|Q13428-4|TCOF_HUMAN, sp|Q13428-7|TCOF_HUMAN, sp|Q13428-8|TCOF_HUMAN, sp|Q13428|TCOF_HUMAN	2	6552679	MS/MS	STY:79.9663@KLGAGEGGEAS(0.5000)VS(0.5000)PEK;
KLGDVSPTQIDVSQFGSFK	KLGDVS[79.9663]PTQIDVSQFGSFK	R	E	1496	1514	19	3	6S(79.9663)	sp|P46821|MAP1B_HUMAN	P46821	MAP1B_HUMAN	MAP1B	Microtubule-associated protein 1B			2	0	MS/MS	STY:79.9663@KLGDVS(0.8482)PT(0.0506)QIDVS(0.0506)QFGS(0.0506)FK;
KLGVSVSPSR	KLGVS[79.9663]VSPSR	K	A	528	537	10	2	5S(79.9663)	sp|Q86VM9|ZCH18_HUMAN	Q86VM9	ZCH18_HUMAN	ZC3H18	Zinc finger CCCH domain-containing protein 18			1	924295	MS/MS	STY:79.9663@KLGVS(0.3333)VS(0.3333)PS(0.3333)R;
KLSGDQITLPTTVDYSSVPK	KLS[79.9663]GDQITLPTTVDYSSVPK	R	Q	34	53	20	3	3S(79.9663)	sp|O00559-2|RCAS1_HUMAN	O00559-2	RCAS1_HUMAN	EBAG9	Isoform 2 of Receptor-binding cancer antigen expressed on SiSo cells		sp|O00559|RCAS1_HUMAN	1	0	MS/MS	STY:79.9663@KLS(0.8850)GDQIT(0.0171)LPT(0.0216)T(0.0216)VDY(0.0182)S(0.0182)S(0.0182)VPK;
KLSGDQPAAR	KLS[79.9663]GDQPAAR	R	T	1310	1319	10	2	3S(79.9663)	sp|Q13428-6|TCOF_HUMAN	Q13428-6	TCOF_HUMAN	TCOF1	Isoform 6 of Treacle protein		sp|Q13428-2|TCOF_HUMAN, sp|Q13428-3|TCOF_HUMAN, sp|Q13428-4|TCOF_HUMAN, sp|Q13428-7|TCOF_HUMAN, sp|Q13428-8|TCOF_HUMAN, sp|Q13428|TCOF_HUMAN	1	1.6163841E7	MS/MS	STY:79.9663@KLS(1.0000)GDQPAAR;
KLSLGQYDNDAGGQLPFSK	KLS[79.9663]LGQYDNDAGGQLPFSK	R	C	534	552	19	3	3S(79.9663)	sp|Q68CZ2-2|TENS3_HUMAN	Q68CZ2-2	TENS3_HUMAN	TNS3	Isoform 2 of Tensin-3		sp|Q68CZ2|TENS3_HUMAN	1	0	MS/MS	STY:79.9663@KLS(0.9012)LGQY(0.0499)DNDAGGQLPFS(0.0489)K;
KLSSSDAPAQDTGSSAAAVETDASR	KLS[79.9663]SSDAPAQDTGSSAAAVETDASR	R	T	838	862	25	3	3S(79.9663)	sp|Q7Z4S6-2|KI21A_HUMAN	Q7Z4S6-2	KI21A_HUMAN	KIF21A	Isoform 2 of Kinesin-like protein KIF21A		sp|Q7Z4S6-3|KI21A_HUMAN, sp|Q7Z4S6-4|KI21A_HUMAN, sp|Q7Z4S6-5|KI21A_HUMAN, sp|Q7Z4S6-6|KI21A_HUMAN, sp|Q7Z4S6|KI21A_HUMAN	1	0	MS/MS	STY:79.9663@KLS(0.3080)S(0.3080)S(0.3080)DAPAQDT(0.0159)GS(0.0159)S(0.0159)AAAVET(0.0141)DAS(0.0141)R;
KLSVPTSDEEDEVPAPK	KLS[79.9663]VPTSDEEDEVPAPK	K	P	103	119	17	2	3S(79.9663)	sp|Q8NE71|ABCF1_HUMAN	Q8NE71	ABCF1_HUMAN	ABCF1	ATP-binding cassette sub-family F member 1		sp|Q8NE71-2|ABCF1_HUMAN	1	0	MS/MS	STY:79.9663@KLS(0.8850)VPT(0.0575)S(0.0575)DEEDEVPAPK;
KLSVPTSDEEDEVPAPK	KLS[79.9663]VPT[79.9663]S[79.9663]DEEDEVPAPK	K	P	103	119	17	2	3S(79.9663),6T(79.9663),7S(79.9663)	sp|Q8NE71|ABCF1_HUMAN	Q8NE71	ABCF1_HUMAN	ABCF1	ATP-binding cassette sub-family F member 1		sp|Q8NE71-2|ABCF1_HUMAN	4	9639596	MS/MS	STY:79.9663@KLS(1.0000)VPT(1.0000)S(1.0000)DEEDEVPAPK;
KLTSDEEGEPSGK	KLTS[79.9663]DEEGEPSGK	K	R	567	579	13	2	4S(79.9663)	sp|Q8WVC0-2|LEO1_HUMAN	Q8WVC0-2	LEO1_HUMAN	LEO1	Isoform 2 of RNA polymerase-associated protein LEO1		sp|Q8WVC0|LEO1_HUMAN	1	3.76539e+06	MS/MS	STY:79.9663@KLT(0.2167)S(0.3917)DEEGEPS(0.3917)GK;
KLTSDEEGEPSGK	KLT[79.9663]SDEEGEPSGK	K	R	567	579	13	2	3T(79.9663)	sp|Q8WVC0-2|LEO1_HUMAN	Q8WVC0-2	LEO1_HUMAN	LEO1	Isoform 2 of RNA polymerase-associated protein LEO1		sp|Q8WVC0|LEO1_HUMAN	2	3.76539e+06	MS/MS	STY:79.9663@KLT(0.4809)S(0.2595)DEEGEPS(0.2595)GK;
KMSDDEDDDEEEYGKEEHEK	KMS[79.9663]DDEDDDEEEYGKEEHEK	K	E	123	142	20	4	3S(79.9663)	sp|Q7KZ85-3|SPT6H_HUMAN	Q7KZ85-3	SPT6H_HUMAN	SUPT6H	Isoform 3 of Transcription elongation factor SPT6		sp|Q7KZ85|SPT6H_HUMAN	2	2.6785e+06	MS/MS	STY:79.9663@KMS(0.9279)DDEDDDEEEY(0.0721)GKEEHEK;
KPATPAEDDEDDDIDLFGSDNEEEDK	KPATPAEDDEDDDIDLFGS[79.9663]DNEEEDK	K	E	144	169	26	2,3	19S(79.9663)	sp|P29692|EF1D_HUMAN	P29692	EF1D_HUMAN	EEF1D	Elongation factor 1-delta		sp|P29692-2|EF1D_HUMAN, sp|P29692-3|EF1D_HUMAN, sp|P29692-4|EF1D_HUMAN	18	6.653705E8	MS/MS	STY:79.9663@KPAT(0.0621)PAEDDEDDDIDLFGS(0.9379)DNEEEDK;
KPATPAEDDEDDDIDLFGSDNEEEDK	KPAT[79.9663]PAEDDEDDDIDLFGSDNEEEDK	K	E	144	169	26	3	4T(79.9663)	sp|P29692|EF1D_HUMAN	P29692	EF1D_HUMAN	EEF1D	Elongation factor 1-delta		sp|P29692-2|EF1D_HUMAN, sp|P29692-3|EF1D_HUMAN, sp|P29692-4|EF1D_HUMAN	8	6.6332941E8	MS/MS	STY:79.9663@KPAT(0.9341)PAEDDEDDDIDLFGS(0.0659)DNEEEDK;
KPATPAEDDEDDDIDLFGSDNEEEDK	KPAT[79.9663]PAEDDEDDDIDLFGS[79.9663]DNEEEDK	K	E	144	169	26	3	19S(79.9663),4T(79.9663)	sp|P29692|EF1D_HUMAN	P29692	EF1D_HUMAN	EEF1D	Elongation factor 1-delta		sp|P29692-2|EF1D_HUMAN, sp|P29692-3|EF1D_HUMAN, sp|P29692-4|EF1D_HUMAN	13	1.0809944E8	MS/MS	STY:79.9663@KPAT(1.0000)PAEDDEDDDIDLFGS(1.0000)DNEEEDK;
KPGDGEVSPSTEDAPFQHSPLGK	KPGDGEVS[79.9663]PSTEDAPFQHSPLGK	K	A	520	542	23	3	8S(79.9663)	sp|O60318|GANP_HUMAN	O60318	GANP_HUMAN	MCM3AP	Germinal-center associated nuclear protein			1	2.5322e+06	MS/MS	STY:79.9663@KPGDGEVS(0.3088)PS(0.3088)T(0.3088)EDAPFQHS(0.0736)PLGK;
KPIETGSPK	KPIET[79.9663]GSPK	K	T	442	450	9	2	5T(79.9663)	sp|Q05519-2|SRS11_HUMAN	Q05519-2	SRS11_HUMAN	SRSF11	Isoform 2 of Serine/arginine-rich splicing factor 11		sp|Q05519|SRS11_HUMAN	4	1.7066424E7	MS/MS	STY:79.9663@KPIET(0.7660)GS(0.2340)PK;
KPLPDHVSIVEPKDEILPTTPISEQK	KPLPDHVSIVEPKDEILPT[79.9663]TPISEQK	K	G	218	243	26	4	19T(79.9663)	sp|P23396-2|RS3_HUMAN	P23396-2	RS3_HUMAN	RPS3	Isoform 2 of Small ribosomal subunit protein uS3		sp|P23396|RS3_HUMAN	1	5554705	MS/MS	STY:79.9663@KPLPDHVS(0.0496)IVEPKDEILPT(0.3168)T(0.3168)PIS(0.3168)EQK;
KPPAPPSPVQSQSPSTNWSPAVPVK	KPPAPPSPVQSQSPST[79.9663]NWS[79.9663]PAVPVK	K	K	763	787	25	3	16T(79.9663),19S(79.9663)	sp|Q8IYB3|SRRM1_HUMAN	Q8IYB3	SRRM1_HUMAN	SRRM1	Serine/arginine repetitive matrix protein 1		sp|Q8IYB3-2|SRRM1_HUMAN	1	0	MS/MS	STY:79.9663@KPPAPPS(0.2030)PVQS(0.2030)QS(0.2030)PS(0.2030)T(0.5940)NWS(0.5940)PAVPVK;
KPPAPPSPVQSQSPSTNWSPAVPVK	KPPAPPSPVQSQSPS[79.9663]T[79.9663]NWSPAVPVK	K	K	763	787	25	3	15S(79.9663),16T(79.9663)	sp|Q8IYB3|SRRM1_HUMAN	Q8IYB3	SRRM1_HUMAN	SRRM1	Serine/arginine repetitive matrix protein 1		sp|Q8IYB3-2|SRRM1_HUMAN	1	3.0644628E7	MS/MS	STY:79.9663@KPPAPPS(0.0784)PVQS(0.4650)QS(0.4650)PS(0.4790)T(0.4790)NWS(0.0336)PAVPVK;
KPPAPPSPVQSQSPSTNWSPAVPVK	KPPAPPSPVQSQS[79.9663]PS[79.9663]TNWS[79.9663]PAVPVK	K	K	763	787	25	3	13S(79.9663),15S(79.9663),19S(79.9663)	sp|Q8IYB3|SRRM1_HUMAN	Q8IYB3	SRRM1_HUMAN	SRRM1	Serine/arginine repetitive matrix protein 1		sp|Q8IYB3-2|SRRM1_HUMAN	1	0	MS/MS	STY:79.9663@KPPAPPS(0.2398)PVQS(0.2398)QS(0.6183)PS(0.6183)T(0.6183)NWS(0.6655)PAVPVK;
KPPAPPSPVQSQSPSTNWSPAVPVK	KPPAPPSPVQSQS[79.9663]PS[79.9663]T[79.9663]NWSPAVPVK	K	K	763	787	25	3	13S(79.9663),15S(79.9663),16T(79.9663)	sp|Q8IYB3|SRRM1_HUMAN	Q8IYB3	SRRM1_HUMAN	SRRM1	Serine/arginine repetitive matrix protein 1		sp|Q8IYB3-2|SRRM1_HUMAN	1	2.0910486E7	MS/MS	STY:79.9663@KPPAPPS(0.3555)PVQS(0.3555)QS(0.5723)PS(0.5723)T(0.5723)NWS(0.5723)PAVPVK;
KPPAPPSPVQSQSPSTNWSPAVPVK	KPPAPPSPVQS[79.9663]QSPSTNWSPAVPVK	K	K	763	787	25	3	11S(79.9663)	sp|Q8IYB3|SRRM1_HUMAN	Q8IYB3	SRRM1_HUMAN	SRRM1	Serine/arginine repetitive matrix protein 1		sp|Q8IYB3-2|SRRM1_HUMAN	1	0	MS/MS	STY:79.9663@KPPAPPS(0.0585)PVQS(0.3805)QS(0.3805)PS(0.0602)T(0.0602)NWS(0.0602)PAVPVK;
KPPAPPSPVQSQSPSTNWSPAVPVK	KPPAPPSPVQS[79.9663]QS[79.9663]PS[79.9663]TNWSPAVPVK	K	K	763	787	25	3	11S(79.9663),13S(79.9663),15S(79.9663)	sp|Q8IYB3|SRRM1_HUMAN	Q8IYB3	SRRM1_HUMAN	SRRM1	Serine/arginine repetitive matrix protein 1		sp|Q8IYB3-2|SRRM1_HUMAN	1	2.105571E7	MS/MS	STY:79.9663@KPPAPPS(0.1275)PVQS(0.5745)QS(0.5745)PS(0.5745)T(0.5745)NWS(0.5745)PAVPVK;
KPPAPPSPVQSQSPSTNWSPAVPVK	KPPAPPS[79.9663]PVQSQSPSTNWSPAVPVK	K	K	763	787	25	3	7S(79.9663)	sp|Q8IYB3|SRRM1_HUMAN	Q8IYB3	SRRM1_HUMAN	SRRM1	Serine/arginine repetitive matrix protein 1		sp|Q8IYB3-2|SRRM1_HUMAN	1	3.63128e+06	MS/MS	STY:79.9663@KPPAPPS(0.3237)PVQS(0.3237)QS(0.3237)PS(0.0098)T(0.0098)NWS(0.0094)PAVPVK;
KPPAPPSPVQSQSPSTNWSPAVPVK	KPPAPPS[79.9663]PVQSQSPST[79.9663]NWSPAVPVK	K	K	763	787	25	3	16T(79.9663),7S(79.9663)	sp|Q8IYB3|SRRM1_HUMAN	Q8IYB3	SRRM1_HUMAN	SRRM1	Serine/arginine repetitive matrix protein 1		sp|Q8IYB3-2|SRRM1_HUMAN	1	3.0644628E7	MS/MS	STY:79.9663@KPPAPPS(0.6073)PVQS(0.1080)QS(0.1080)PS(0.1080)T(0.5344)NWS(0.5344)PAVPVK;
KPPAPPSPVQSQSPSTNWSPAVPVK	KPPAPPS[79.9663]PVQSQS[79.9663]PSTNWSPAVPVK	K	K	763	787	25	3	13S(79.9663),7S(79.9663)	sp|Q8IYB3|SRRM1_HUMAN	Q8IYB3	SRRM1_HUMAN	SRRM1	Serine/arginine repetitive matrix protein 1		sp|Q8IYB3-2|SRRM1_HUMAN	2	3.0644628E7	MS/MS	STY:79.9663@KPPAPPS(0.6068)PVQS(0.0388)QS(0.6048)PS(0.2477)T(0.1136)NWS(0.3884)PAVPVK;
KPPAPPSPVQSQSPSTNWSPAVPVK	KPPAPPS[79.9663]PVQS[79.9663]QSPSTNWSPAVPVK	K	K	763	787	25	3	11S(79.9663),7S(79.9663)	sp|Q8IYB3|SRRM1_HUMAN	Q8IYB3	SRRM1_HUMAN	SRRM1	Serine/arginine repetitive matrix protein 1		sp|Q8IYB3-2|SRRM1_HUMAN	4	3.0644628E7	MS/MS	STY:79.9663@KPPAPPS(0.6904)PVQS(0.5928)QS(0.5928)PS(0.0421)T(0.0421)NWS(0.0397)PAVPVK;
KPPAPPSPVQSQSPSTNWSPAVPVKK	KPPAPPS[79.9663]PVQS[79.9663]QSPSTNWSPAVPVKK	K	A	763	788	26	3	11S(79.9663),7S(79.9663)	sp|Q8IYB3|SRRM1_HUMAN	Q8IYB3	SRRM1_HUMAN	SRRM1	Serine/arginine repetitive matrix protein 1		sp|Q8IYB3-2|SRRM1_HUMAN	1	2.14704e+06	MS/MS	STY:79.9663@KPPAPPS(0.3333)PVQS(0.3333)QS(0.3333)PS(0.3333)T(0.3333)NWS(0.3333)PAVPVKK;
KPPAPPSPVQSQSPSTNWSPAVPVK	KPPAPPS[79.9663]PVQS[79.9663]QSPSTNWS[79.9663]PAVPVK	K	K	763	787	25	3	11S(79.9663),19S(79.9663),7S(79.9663)	sp|Q8IYB3|SRRM1_HUMAN	Q8IYB3	SRRM1_HUMAN	SRRM1	Serine/arginine repetitive matrix protein 1		sp|Q8IYB3-2|SRRM1_HUMAN	2	2.0910486E7	MS/MS	STY:79.9663@KPPAPPS(0.5263)PVQS(0.4871)QS(0.4871)PS(0.4871)T(0.4871)NWS(0.5252)PAVPVK;
KPPAPPSPVQSQSPSTNWSPAVPVK	KPPAPPS[79.9663]PVQS[79.9663]QSPST[79.9663]NWSPAVPVK	K	K	763	787	25	3	11S(79.9663),16T(79.9663),7S(79.9663)	sp|Q8IYB3|SRRM1_HUMAN	Q8IYB3	SRRM1_HUMAN	SRRM1	Serine/arginine repetitive matrix protein 1		sp|Q8IYB3-2|SRRM1_HUMAN	1	2.0910486E7	MS/MS	STY:79.9663@KPPAPPS(0.6597)PVQS(0.6597)QS(0.6597)PS(0.0950)T(0.7102)NWS(0.2158)PAVPVK;
KPPAPPSPVQSQSPSTNWSPAVPVK	KPPAPPS[79.9663]PVQS[79.9663]QS[79.9663]PSTNWSPAVPVK	K	K	763	787	25	3	11S(79.9663),13S(79.9663),7S(79.9663)	sp|Q8IYB3|SRRM1_HUMAN	Q8IYB3	SRRM1_HUMAN	SRRM1	Serine/arginine repetitive matrix protein 1		sp|Q8IYB3-2|SRRM1_HUMAN	4	2.105571E7	MS/MS	STY:79.9663@KPPAPPS(0.6028)PVQS(0.6028)QS(0.6078)PS(0.3955)T(0.3955)NWS(0.3955)PAVPVK;
KPPAPPSPVQSQSPSTNWSPAVPVKK	KPPAPPS[79.9663]PVQS[79.9663]QS[79.9663]PSTNWSPAVPVKK	K	A	763	788	26	3	11S(79.9663),13S(79.9663),7S(79.9663)	sp|Q8IYB3|SRRM1_HUMAN	Q8IYB3	SRRM1_HUMAN	SRRM1	Serine/arginine repetitive matrix protein 1		sp|Q8IYB3-2|SRRM1_HUMAN	1	6420102	MS/MS	STY:79.9663@KPPAPPS(0.5000)PVQS(0.5000)QS(0.5000)PS(0.5000)T(0.5000)NWS(0.5000)PAVPVKK;
KPSGSPDLWK	KPSGS[79.9663]PDLWK	R	L	441	450	10	2	5S(79.9663)	sp|Q96JM3|CHAP1_HUMAN	Q96JM3	CHAP1_HUMAN	CHAMP1	Chromosome alignment-maintaining phosphoprotein 1			1	1.3199e+06	MS/MS	STY:79.9663@KPS(0.3846)GS(0.6154)PDLWK;
KPSLVSDLPWEGAAPQSPSFSGSEDSGSPK	KPS[79.9663]LVSDLPWEGAAPQSPSFSGSEDSGSPK	K	H	206	235	30	3	3S(79.9663)	sp|Q13425-2|SNTB2_HUMAN	Q13425-2	SNTB2_HUMAN	SNTB2	Isoform 2 of Beta-2-syntrophin		sp|Q13425|SNTB2_HUMAN	1	0	MS/MS	STY:79.9663@KPS(0.1807)LVS(0.1807)DLPWEGAAPQS(0.1064)PS(0.1064)FS(0.1064)GS(0.1064)EDS(0.1064)GS(0.1064)PK;
KPSPQPSSPR	KPS[79.9663]PQPS[79.9663]SPR	K	Q	322	331	10	2	3S(79.9663),7S(79.9663)	sp|O75909-1|CCNK_HUMAN	O75909-1	CCNK_HUMAN	CCNK	Isoform 3 of Cyclin-K		sp|O75909-4|CCNK_HUMAN, sp|O75909|CCNK_HUMAN	1	2.91224e+06	MS/MS	STY:79.9663@KPS(0.6667)PQPS(0.6667)S(0.6667)PR;
KPVTVSPTTPTSPTEGEAS	KPVTVSPTT[79.9663]PTSPTEGEAS	R	-	505	523	19	2	9T(79.9663)	sp|Q9Y6G9|DC1L1_HUMAN	Q9Y6G9	DC1L1_HUMAN	DYNC1LI1	Cytoplasmic dynein 1 light intermediate chain 1			1	7689930	MS/MS	STY:79.9663@KPVT(0.0112)VS(0.0112)PT(0.0286)T(0.4510)PT(0.4510)S(0.0209)PT(0.0142)EGEAS(0.0119);
KPVTVSPTTPTSPTEGEAS	KPVTVSPT[79.9663]TPTSPTEGEAS	R	-	505	523	19	2	8T(79.9663)	sp|Q9Y6G9|DC1L1_HUMAN	Q9Y6G9	DC1L1_HUMAN	DYNC1LI1	Cytoplasmic dynein 1 light intermediate chain 1			1	7689930	MS/MS	STY:79.9663@KPVT(0.0067)VS(0.0067)PT(0.1949)T(0.1949)PT(0.1949)S(0.1949)PT(0.1949)EGEAS(0.0119);
KPVTVSPTTPTSPTEGEAS	KPVT[79.9663]VSPTTPTSPTEGEAS	R	-	505	523	19	2	4T(79.9663)	sp|Q9Y6G9|DC1L1_HUMAN	Q9Y6G9	DC1L1_HUMAN	DYNC1LI1	Cytoplasmic dynein 1 light intermediate chain 1			1	7689930	MS/MS	STY:79.9663@KPVT(0.7347)VS(0.0379)PT(0.0379)T(0.0379)PT(0.0379)S(0.0379)PT(0.0379)EGEAS(0.0379);
KPYRIESDEEEDFENVGK	KPY[79.9663]RIESDEEEDFENVGK	K	V	1308	1325	18	3	3Y(79.9663)	sp|Q96T23-2|RSF1_HUMAN	Q96T23-2	RSF1_HUMAN	RSF1	Isoform 2 of Remodeling and spacing factor 1		sp|Q96T23-3|RSF1_HUMAN, sp|Q96T23|RSF1_HUMAN	1	9109478	MS/MS	STY:79.9663@KPY(0.5000)RIES(0.5000)DEEEDFENVGK;
KQDDSPPRPIIGPALPPGFIK	KQDDS[79.9663]PPRPIIGPALPPGFIK	K	S	101	121	21	3	5S(79.9663)	sp|Q8IXQ4|GPAM1_HUMAN	Q8IXQ4	GPAM1_HUMAN	GPALPP1	GPALPP motifs-containing protein 1		sp|Q8IXQ4-4|GPAM1_HUMAN	2	1.524749E7	MS/MS	STY:79.9663@KQDDS(1.0000)PPRPIIGPALPPGFIK;
KQEGPATQVDSAVGTLPATSPQSTSVQAK	KQEGPATQVDSAVGT[79.9663]LPATSPQSTSVQAK	K	G	1054	1082	29	3	15T(79.9663)	sp|Q13428-6|TCOF_HUMAN	Q13428-6	TCOF_HUMAN	TCOF1	Isoform 6 of Treacle protein		sp|Q13428-7|TCOF_HUMAN	1	2.51058e+06	MS/MS	STY:79.9663@KQEGPAT(0.0043)QVDS(0.0043)AVGT(0.1652)LPAT(0.1652)S(0.1652)PQS(0.1652)T(0.1652)S(0.1652)VQAK;
KQPPVSPGTALVGSQK	KQPPVS[79.9663]PGTALVGSQK	R	E	31	46	16	2	6S(79.9663)	sp|P17096|HMGA1_HUMAN	P17096	HMGA1_HUMAN	HMGA1	High mobility group protein HMG-I/HMG-Y		sp|P17096-3|HMGA1_HUMAN	1	2.14169e+06	MS/MS	STY:79.9663@KQPPVS(0.3457)PGT(0.3457)ALVGS(0.3086)QK;
KQSFDDNDSEELEDK	KQSFDDNDS[79.9663]EELEDK	K	D	105	119	15	2	9S(79.9663)	sp|O60841|IF2P_HUMAN	O60841	IF2P_HUMAN	EIF5B	Eukaryotic translation initiation factor 5B			1	4.16283e+06	MS/MS	STY:79.9663@KQS(0.4794)FDDNDS(0.5206)EELEDK;
KQSFDDNDSEELEDK	KQS[79.9663]FDDNDSEELEDK	K	D	105	119	15	2	3S(79.9663)	sp|O60841|IF2P_HUMAN	O60841	IF2P_HUMAN	EIF5B	Eukaryotic translation initiation factor 5B			2	0	MS/MS	STY:79.9663@KQS(0.9059)FDDNDS(0.0941)EELEDK;
KQSFDDNDSEELEDK	KQS[79.9663]FDDNDS[79.9663]EELEDK	K	D	105	119	15	2	3S(79.9663),9S(79.9663)	sp|O60841|IF2P_HUMAN	O60841	IF2P_HUMAN	EIF5B	Eukaryotic translation initiation factor 5B			2	0	MS/MS	STY:79.9663@KQS(1.0000)FDDNDS(1.0000)EELEDK;
KRESESESDETPPAAPQLIK	KRES[79.9663]ESESDETPPAAPQLIK	R	K	448	467	20	3	4S(79.9663)	sp|O60832|DKC1_HUMAN	O60832	DKC1_HUMAN	DKC1	H/ACA ribonucleoprotein complex subunit DKC1			1	1.28379e+06	MS/MS	STY:79.9663@KRES(0.2500)ES(0.2500)ES(0.2500)DET(0.2500)PPAAPQLIK;
KRESESESDETPPAAPQLIK	KRES[79.9663]ES[79.9663]ESDETPPAAPQLIK	R	K	448	467	20	3	4S(79.9663),6S(79.9663)	sp|O60832|DKC1_HUMAN	O60832	DKC1_HUMAN	DKC1	H/ACA ribonucleoprotein complex subunit DKC1			1	1.5557655E7	MS/MS	STY:79.9663@KRES(0.5000)ES(0.5000)ES(0.5000)DET(0.5000)PPAAPQLIK;
KRESESESDETPPAAPQLIK	KRES[79.9663]ES[79.9663]ESDET[79.9663]PPAAPQLIK	R	K	448	467	20	3	11T(79.9663),4S(79.9663),6S(79.9663)	sp|O60832|DKC1_HUMAN	O60832	DKC1_HUMAN	DKC1	H/ACA ribonucleoprotein complex subunit DKC1			2	1.2350677E7	MS/MS	STY:79.9663@KRES(0.7600)ES(0.7403)ES(0.7403)DET(0.7593)PPAAPQLIK;
KRESESESDETPPAAPQLIK	KRES[79.9663]ES[79.9663]ES[79.9663]DETPPAAPQLIK	R	K	448	467	20	3	4S(79.9663),6S(79.9663),8S(79.9663)	sp|O60832|DKC1_HUMAN	O60832	DKC1_HUMAN	DKC1	H/ACA ribonucleoprotein complex subunit DKC1			2	1.213387E7	MS/MS	STY:79.9663@KRES(0.7500)ES(0.7500)ES(0.7500)DET(0.7500)PPAAPQLIK;
KRETDDEGEDD	KRET[79.9663]DDEGEDD	R	-	241	251	11	2	4T(79.9663)	sp|Q92688|AN32B_HUMAN	Q92688	AN32B_HUMAN	ANP32B	Acidic leucine-rich nuclear phosphoprotein 32 family member B			1	2.4360434E7	MS/MS	STY:79.9663@KRET(1.0000)DDEGEDD;
KRSSSEDAESLAPR	KRS[79.9663]SSEDAESLAPR	R	S	303	316	14	3	3S(79.9663)	sp|Q4G0J3-3|LARP7_HUMAN	Q4G0J3-3	LARP7_HUMAN	LARP7	Isoform 3 of La-related protein 7		sp|Q4G0J3|LARP7_HUMAN	2	1.72437e+06	MS/MS	STY:79.9663@KRS(0.3277)S(0.3277)S(0.3277)EDAES(0.0170)LAPR;
KRSSSEDDDLDVESDFDDASINSYSVSDGSTSR	KRS[79.9663]S[79.9663]S[79.9663]EDDDLDVESDFDDASINSYSVSDGSTSR	R	S	306	338	33	3	3S(79.9663),4S(79.9663),5S(79.9663)	sp|Q14839-2|CHD4_HUMAN	Q14839-2	CHD4_HUMAN	CHD4	Isoform 2 of Chromodomain-helicase-DNA-binding protein 4		sp|Q14839|CHD4_HUMAN	1	0	MS/MS	STY:79.9663@KRS(0.3563)S(0.3563)S(0.3563)EDDDLDVES(0.1958)DFDDAS(0.1958)INS(0.2199)Y(0.2199)S(0.2199)VS(0.2199)DGS(0.2199)T(0.2199)S(0.2199)R;
KSPRPAGPQLFLPDPDPQR	KS[79.9663]PRPAGPQLFLPDPDPQR	R	G	151	169	19	3	2S(79.9663)	sp|Q9BUH6|PAXX_HUMAN	Q9BUH6	PAXX_HUMAN	PAXX	Protein PAXX			3	2.01844e+06	MS/MS	STY:79.9663@KS(1.0000)PRPAGPQLFLPDPDPQR;
KSPVGKSPPSTGSTYGSSQK	KS[79.9663]PVGKSPPSTGSTYGSSQK	K	E	314	333	20	3	2S(79.9663)	sp|Q9Y2W1|TR150_HUMAN	Q9Y2W1	TR150_HUMAN	THRAP3	Thyroid hormone receptor-associated protein 3			1	1.61567e+06	MS/MS	STY:79.9663@KS(0.1111)PVGKS(0.1111)PPS(0.1111)T(0.1111)GS(0.1111)T(0.1111)Y(0.1111)GS(0.1111)S(0.1111)QK;
KSPVGKSPPSTGSTYGSSQK	KS[79.9663]PVGKSPPS[79.9663]TGSTYGSSQK	K	E	314	333	20	3	10S(79.9663),2S(79.9663)	sp|Q9Y2W1|TR150_HUMAN	Q9Y2W1	TR150_HUMAN	THRAP3	Thyroid hormone receptor-associated protein 3			1	1.3188e+06	MS/MS	STY:79.9663@KS(0.3060)PVGKS(0.0173)PPS(0.2395)T(0.2395)GS(0.2395)T(0.2395)Y(0.2395)GS(0.2395)S(0.2395)QK;
KSPVGKSPPSTGSTYGSSQK	KS[79.9663]PVGKS[79.9663]PPSTGSTYGSSQK	K	E	314	333	20	3	2S(79.9663),7S(79.9663)	sp|Q9Y2W1|TR150_HUMAN	Q9Y2W1	TR150_HUMAN	THRAP3	Thyroid hormone receptor-associated protein 3			4	1.339295E7	MS/MS	STY:79.9663@KS(0.4490)PVGKS(0.4490)PPS(0.4490)T(0.4490)GS(0.0408)T(0.0408)Y(0.0408)GS(0.0408)S(0.0408)QK;
KTPEGRASPAPGSGHPEGPGAHLDMNSLDR	KTPEGRASPAPGSGHPEGPGAHLDMNS[79.9663]LDR	R	A	84	113	30	5	27S(79.9663)	sp|O94826|TOM70_HUMAN	O94826	TOM70_HUMAN	TOMM70	Mitochondrial import receptor subunit TOM70			1	3287891	MS/MS	STY:79.9663@KT(0.0261)PEGRAS(0.0349)PAPGS(0.0349)GHPEGPGAHLDMNS(0.9042)LDR;
KTSTSPPPEK	KTSTS[79.9663]PPPEK	K	S	219	228	10	2	5S(79.9663)	sp|Q9H1E3|NUCKS_HUMAN	Q9H1E3	NUCKS_HUMAN	NUCKS1	Nuclear ubiquitous casein and cyclin-dependent kinase substrate 1		sp|Q9H1E3-2|NUCKS_HUMAN	1	1.1399923E7	MS/MS	STY:79.9663@KT(0.0250)S(0.0250)T(0.0250)S(0.9251)PPPEK;
KTSDANETEDHLESLICK	KT[79.9663]SDANETEDHLESLIC[57.0215]K	R	V	20	37	18	3	17C(57.0215),2T(79.9663)	sp|Q09161|NCBP1_HUMAN	Q09161	NCBP1_HUMAN	NCBP1	Nuclear cap-binding protein subunit 1			3	1.1258004E7	MS/MS	STY:79.9663@KT(0.4851)S(0.4851)DANET(0.0152)EDHLES(0.0146)LICK;
KTSTSPPPEK	KT[79.9663]STSPPPEK	K	S	219	228	10	2	2T(79.9663)	sp|Q9H1E3|NUCKS_HUMAN	Q9H1E3	NUCKS_HUMAN	NUCKS1	Nuclear ubiquitous casein and cyclin-dependent kinase substrate 1		sp|Q9H1E3-2|NUCKS_HUMAN	4	1.1399923E7	MS/MS	STY:79.9663@KT(0.4618)S(0.4618)T(0.0382)S(0.0382)PPPEK;
KTSSDDESEEDEDDLLQR	KT[79.9663]S[79.9663]SDDESEEDEDDLLQR	R	T	203	220	18	2	2T(79.9663),3S(79.9663)	sp|Q9Y5J1|UTP18_HUMAN	Q9Y5J1	UTP18_HUMAN	UTP18	U3 small nucleolar RNA-associated protein 18 homolog			1	3101859	MS/MS	STY:79.9663@KT(0.5000)S(0.5000)S(0.5000)DDES(0.5000)EEDEDDLLQR;
KTSTSPPPEK	KT[79.9663]S[79.9663]TSPPPEK	K	S	219	228	10	2	2T(79.9663),3S(79.9663)	sp|Q9H1E3|NUCKS_HUMAN	Q9H1E3	NUCKS_HUMAN	NUCKS1	Nuclear ubiquitous casein and cyclin-dependent kinase substrate 1		sp|Q9H1E3-2|NUCKS_HUMAN	2	4.08726e+06	MS/MS	STY:79.9663@KT(0.5000)S(0.5000)T(0.5000)S(0.5000)PPPEK;
KVATPPNQNQK	KVAT[79.9663]PPNQNQK	K	Q	94	104	11	2	4T(79.9663)	sp|Q6NUQ4-2|TM214_HUMAN	Q6NUQ4-2	TM214_HUMAN	TMEM214	Isoform 2 of Transmembrane protein 214		sp|Q6NUQ4|TM214_HUMAN	1	0	MS/MS	STY:79.9663@KVAT(1.0000)PPNQNQK;
KVDEGAGDSAAVASGGAQTLALAGSPAPSGHPK	KVDEGAGDS[79.9663]AAVASGGAQTLALAGSPAPSGHPK	R	A	460	492	33	3	9S(79.9663)	sp|Q9NZT2-2|OGFR_HUMAN	Q9NZT2-2	OGFR_HUMAN	OGFR	Isoform 2 of Opioid growth factor receptor		sp|Q9NZT2|OGFR_HUMAN	1	0	MS/MS	STY:79.9663@KVDEGAGDS(0.7937)AAVAS(0.0816)GGAQT(0.0416)LALAGS(0.0416)PAPS(0.0416)GHPK;
KVEEEQEADEEDVSEEEAESK	KVEEEQEADEEDVS[79.9663]EEEAESK	K	E	234	254	21	2,3	14S(79.9663)	sp|Q9H3N1|TMX1_HUMAN	Q9H3N1	TMX1_HUMAN	TMX1	Thioredoxin-related transmembrane protein 1			8	6.5028192E7	MS/MS	STY:79.9663@KVEEEQEADEEDVS(0.9008)EEEAES(0.0992)K;
KVELSESEEDK	KVELS[79.9663]ESEEDK	R	G	459	469	11	2	5S(79.9663)	sp|Q8IYB3|SRRM1_HUMAN	Q8IYB3	SRRM1_HUMAN	SRRM1	Serine/arginine repetitive matrix protein 1		sp|Q8IYB3-2|SRRM1_HUMAN	1	2272809	MS/MS	STY:79.9663@KVELS(0.5000)ES(0.5000)EEDK;
KVELSESEEDK	KVELS[79.9663]ES[79.9663]EEDK	R	G	459	469	11	2	5S(79.9663),7S(79.9663)	sp|Q8IYB3|SRRM1_HUMAN	Q8IYB3	SRRM1_HUMAN	SRRM1	Serine/arginine repetitive matrix protein 1		sp|Q8IYB3-2|SRRM1_HUMAN	2	2.5174762E7	MS/MS	STY:79.9663@KVELS(1.0000)ES(1.0000)EEDK;
KVMDSDEDDDY	KVMDSDEDDDY[79.9663]	R	-	115	125	11	2	11Y(79.9663)	sp|O14737|PDCD5_HUMAN	O14737	PDCD5_HUMAN	PDCD5	Programmed cell death protein 5			1	5512577	MS/MS	STY:79.9663@KVMDS(0.0986)DEDDDY(0.9014);
KVMDSDEDDDY	KVMDS[79.9663]DEDDDY	R	-	115	125	11	2	5S(79.9663)	sp|O14737|PDCD5_HUMAN	O14737	PDCD5_HUMAN	PDCD5	Programmed cell death protein 5			3	1.4461768E7	MS/MS	STY:79.9663@KVMDS(0.8706)DEDDDY(0.1294);
KVMDSDEDDDY	KVM[15.9949]DS[79.9663]DEDDDY	R	-	115	125	11	2	3M(15.9949),5S(79.9663)	sp|O14737|PDCD5_HUMAN	O14737	PDCD5_HUMAN	PDCD5	Programmed cell death protein 5			2	1.533e+06	MS/MS	STY:79.9663@KVMDS(0.7678)DEDDDY(0.2322);M:15.9949@KVM(1.0000)DSDEDDDY;
KVPSFTFTPTVTYQR	KVPS[79.9663]FTFTPTVTYQR	R	G	941	955	15	2	4S(79.9663)	sp|Q9Y6N7-2|ROBO1_HUMAN	Q9Y6N7-2	ROBO1_HUMAN	ROBO1	Isoform 2 of Roundabout homolog 1		sp|Q9Y6N7-3|ROBO1_HUMAN, sp|Q9Y6N7-4|ROBO1_HUMAN, sp|Q9Y6N7|ROBO1_HUMAN	1	0	MS/MS	STY:79.9663@KVPS(0.4726)FT(0.4726)FT(0.0139)PT(0.0139)VT(0.0139)Y(0.0131)QR;
KVVDYSQFQESDDADEDYGR	KVVDYSQFQES[79.9663]DDADEDYGR	R	D	9	28	20	3	11S(79.9663)	sp|Q9H1E3|NUCKS_HUMAN	Q9H1E3	NUCKS_HUMAN	NUCKS1	Nuclear ubiquitous casein and cyclin-dependent kinase substrate 1			2	5209522	MS/MS	STY:79.9663@KVVDY(0.0265)S(0.0265)QFQES(0.9247)DDADEDY(0.0223)GR;
KVVDYSQFQESDDADEDYGRDSGPPTK	KVVDYSQFQES[79.9663]DDADEDYGRDSGPPTK	R	K	9	35	27	3,4	11S(79.9663)	sp|Q9H1E3|NUCKS_HUMAN	Q9H1E3	NUCKS_HUMAN	NUCKS1	Nuclear ubiquitous casein and cyclin-dependent kinase substrate 1			5	5.9553296E7	MS/MS	STY:79.9663@KVVDY(0.0143)S(0.0143)QFQES(0.9148)DDADEDY(0.0212)GRDS(0.0179)GPPT(0.0174)K;
KVVDYSQFQESDDADEDYGR	KVVDYS[79.9663]QFQESDDADEDYGR	R	D	9	28	20	3	6S(79.9663)	sp|Q9H1E3|NUCKS_HUMAN	Q9H1E3	NUCKS_HUMAN	NUCKS1	Nuclear ubiquitous casein and cyclin-dependent kinase substrate 1			1	5209522	MS/MS	STY:79.9663@KVVDY(0.1161)S(0.2946)QFQES(0.2946)DDADEDY(0.2946)GR;
KVVDYSQFQESDDADEDYGRDSGPPTK	KVVDYS[79.9663]QFQESDDADEDYGRDSGPPTK	R	K	9	35	27	3	6S(79.9663)	sp|Q9H1E3|NUCKS_HUMAN	Q9H1E3	NUCKS_HUMAN	NUCKS1	Nuclear ubiquitous casein and cyclin-dependent kinase substrate 1			1	5926203	MS/MS	STY:79.9663@KVVDY(0.0147)S(0.9236)QFQES(0.0160)DDADEDY(0.0175)GRDS(0.0141)GPPT(0.0141)K;
KVVDYSQFQESDDADEDYGRDSGPPTK	KVVDY[79.9663]SQFQESDDADEDYGRDSGPPTK	R	K	9	35	27	3,4	5Y(79.9663)	sp|Q9H1E3|NUCKS_HUMAN	Q9H1E3	NUCKS_HUMAN	NUCKS1	Nuclear ubiquitous casein and cyclin-dependent kinase substrate 1			3	4.5996456E7	MS/MS	STY:79.9663@KVVDY(0.4600)S(0.4600)QFQES(0.0419)DDADEDY(0.0130)GRDS(0.0125)GPPT(0.0125)K;
KVVVSPTK	KVVVS[79.9663]PTK	K	K	63	70	8	2	5S(79.9663)	sp|P19338|NUCL_HUMAN	P19338	NUCL_HUMAN	NCL	Nucleolin			2	1.498261E7	MS/MS	STY:79.9663@KVVVS(0.9389)PT(0.0611)K;
KWDGSEEDEDNSK	KWDGS[79.9663]EEDEDNSK	K	K	160	172	13	2	5S(79.9663)	sp|O60841|IF2P_HUMAN	O60841	IF2P_HUMAN	EIF5B	Eukaryotic translation initiation factor 5B			2	4.25766e+06	MS/MS	STY:79.9663@KWDGS(0.7543)EEDEDNS(0.2457)K;
KYSEVDDSLPSGGEK	KY[79.9663]SEVDDSLPSGGEK	R	P	26	40	15	2	2Y(79.9663)	sp|Q05D32-2|CTSL2_HUMAN	Q05D32-2	CTSL2_HUMAN	CTDSPL2	Isoform 2 of CTD small phosphatase-like protein 2		sp|Q05D32|CTSL2_HUMAN	1	0	MS/MS	STY:79.9663@KY(0.2500)S(0.2500)EVDDS(0.2500)LPS(0.2500)GGEK;
KYVISDEEEEDDD	KY[79.9663]VISDEEEEDDD	K	-	594	606	13	2	2Y(79.9663)	sp|Q8WVC0-2|LEO1_HUMAN	Q8WVC0-2	LEO1_HUMAN	LEO1	Isoform 2 of RNA polymerase-associated protein LEO1		sp|Q8WVC0|LEO1_HUMAN	1	0	MS/MS	STY:79.9663@KY(0.5000)VIS(0.5000)DEEEEDDD;
LAEAPSPAPTPSPTPVEDLGPQTSTSPGRLSPDFAEELR	LAEAPSPAPTPSPTPVEDLGPQTSTSPGRLS[79.9663]PDFAEELR	R	S	1455	1493	39	4	31S(79.9663)	sp|Q14160-2|SCRIB_HUMAN	Q14160-2	SCRIB_HUMAN	SCRIB	Isoform 2 of Protein scribble homolog		sp|Q14160|SCRIB_HUMAN	1	0	MS/MS	STY:79.9663@LAEAPS(0.0804)PAPT(0.0428)PS(0.0546)PT(0.0546)PVEDLGPQT(0.0904)S(0.0904)T(0.0904)S(0.0069)PGRLS(0.4894)PDFAEELR;
LAEDEGDSEPEAVGQSR	LAEDEGDSEPEAVGQS[79.9663]R	R	G	1457	1473	17	2	16S(79.9663)	sp|Q9UIG0-2|BAZ1B_HUMAN	Q9UIG0-2	BAZ1B_HUMAN	BAZ1B	Isoform 2 of Tyrosine-protein kinase BAZ1B		sp|Q9UIG0|BAZ1B_HUMAN	1	7.57055e+06	MS/MS	STY:79.9663@LAEDEGDS(0.3389)EPEAVGQS(0.6611)R;
LAEDEGDSEPEAVGQSR	LAEDEGDS[79.9663]EPEAVGQSR	R	G	1457	1473	17	2	8S(79.9663)	sp|Q9UIG0-2|BAZ1B_HUMAN	Q9UIG0-2	BAZ1B_HUMAN	BAZ1B	Isoform 2 of Tyrosine-protein kinase BAZ1B		sp|Q9UIG0|BAZ1B_HUMAN	2	7.57055e+06	MS/MS	STY:79.9663@LAEDEGDS(0.5000)EPEAVGQS(0.5000)R;
LAPVPSPEPQKPAPVSPESVK	LAPVPS[79.9663]PEPQKPAPVS[79.9663]PESVK	K	A	199	219	21	3	16S(79.9663),6S(79.9663)	sp|Q96JM3|CHAP1_HUMAN	Q96JM3	CHAP1_HUMAN	CHAMP1	Chromosome alignment-maintaining phosphoprotein 1			1	6176423	MS/MS	STY:79.9663@LAPVPS(0.6822)PEPQKPAPVS(0.6589)PES(0.6589)VK;
LASPSGSTSSGLEVVAPEGTSAPGGGPGTLDDSATICR	LASPSGSTSSGLEVVAPEGTSAPGGGPGT[79.9663]LDDSATIC[57.0215]R	R	V	592	629	38	3	29T(79.9663),37C(57.0215)	sp|Q13263|TIF1B_HUMAN	Q13263	TIF1B_HUMAN	TRIM28	Transcription intermediary factor 1-beta		sp|Q13263-2|TIF1B_HUMAN	1	1.5433342E7	MS/MS	STY:79.9663@LAS(0.1875)PS(0.1875)GS(0.1875)T(0.1875)S(0.0065)S(0.0065)GLEVVAPEGT(0.0080)S(0.0080)APGGGPGT(0.2148)LDDS(0.0031)AT(0.0031)ICR;
LASPSGSTSSGLEVVAPEGTSAPGGGPGTLDDSATICR	LASPSGSTSSGLEVVAPEGT[79.9663]S[79.9663]APGGGPGTLDDSATIC[57.0215]R	R	V	592	629	38	3	20T(79.9663),21S(79.9663),37C(57.0215)	sp|Q13263|TIF1B_HUMAN	Q13263	TIF1B_HUMAN	TRIM28	Transcription intermediary factor 1-beta		sp|Q13263-2|TIF1B_HUMAN	1	0	MS/MS	STY:79.9663@LAS(0.0285)PS(0.0285)GS(0.0285)T(0.0285)S(0.0416)S(0.0416)GLEVVAPEGT(0.8695)S(0.8695)APGGGPGT(0.0212)LDDS(0.0212)AT(0.0212)ICR;
LASPSGSTSSGLEVVAPEGTSAPGGGPGTLDDSATICR	LASPSGST[79.9663]SSGLEVVAPEGTSAPGGGPGTLDDSATIC[57.0215]R	R	V	592	629	38	3	37C(57.0215),8T(79.9663)	sp|Q13263|TIF1B_HUMAN	Q13263	TIF1B_HUMAN	TRIM28	Transcription intermediary factor 1-beta		sp|Q13263-2|TIF1B_HUMAN	1	1.5433342E7	MS/MS	STY:79.9663@LAS(0.0064)PS(0.0064)GS(0.0064)T(0.2144)S(0.2144)S(0.2144)GLEVVAPEGT(0.1237)S(0.1237)APGGGPGT(0.0301)LDDS(0.0301)AT(0.0301)ICR;
LASPELER	LAS[79.9663]PELER	K	L	71	78	8	2	3S(79.9663)	sp|P05412|JUN_HUMAN	P05412	JUN_HUMAN	JUN	Transcription factor Jun	JUND	sp|P17535|JUND_HUMAN	1	0	MS/MS	STY:79.9663@LAS(1.0000)PELER;
LCDDGPQLPTSPR	LC[57.0215]DDGPQLPT[79.9663]SPR	R	L	178	190	13	2	10T(79.9663),2C(57.0215)	sp|O60504-2|VINEX_HUMAN	O60504-2	VINEX_HUMAN	SORBS3	Isoform Beta of Vinexin		sp|O60504|VINEX_HUMAN	2	2.99719e+06	MS/MS	STY:79.9663@LCDDGPQLPT(0.5000)S(0.5000)PR;
LCDFGSASHVADNDITPYLVSR	LC[57.0215]DFGSASHVADNDIT[79.9663]PYLVSR	K	F	832	853	22	3	16T(79.9663),2C(57.0215)	sp|Q13523|PRP4B_HUMAN	Q13523	PRP4B_HUMAN	PRPF4B	Serine/threonine-protein kinase PRP4 homolog			3	4925027	MS/MS	STY:79.9663@LCDFGS(0.0095)AS(0.0081)HVADNDIT(0.3275)PY(0.3275)LVS(0.3275)R;
LCDFGSASHVADNDITPYLVSR	LC[57.0215]DFGS[79.9663]ASHVADNDITPYLVSR	K	F	832	853	22	3	2C(57.0215),6S(79.9663)	sp|Q13523|PRP4B_HUMAN	Q13523	PRP4B_HUMAN	PRPF4B	Serine/threonine-protein kinase PRP4 homolog			1	0	MS/MS	STY:79.9663@LCDFGS(0.2000)AS(0.2000)HVADNDIT(0.2000)PY(0.2000)LVS(0.2000)R;
LDNTPASPPRSPAEPNDIPIAK	LDNT[79.9663]PAS[79.9663]PPRSPAEPNDIPIAK	K	G	389	410	22	3	4T(79.9663),7S(79.9663)	sp|O95359-1|TACC2_HUMAN	O95359-1	TACC2_HUMAN	TACC2	Isoform 1 of Transforming acidic coiled-coil-containing protein 2		sp|O95359-2|TACC2_HUMAN, sp|O95359-3|TACC2_HUMAN, sp|O95359-5|TACC2_HUMAN, sp|O95359-6|TACC2_HUMAN, sp|O95359|TACC2_HUMAN	1	3.87441e+06	MS/MS	STY:79.9663@LDNT(0.7048)PAS(0.7048)PPRS(0.5903)PAEPNDIPIAK;
LDQPVSAPPSPR	LDQPVS[79.9663]APPS[79.9663]PR	K	D	235	246	12	2	10S(79.9663),6S(79.9663)	sp|Q16204|CCDC6_HUMAN	Q16204	CCDC6_HUMAN	CCDC6	Coiled-coil domain-containing protein 6			4	3.80781e+06	MS/MS	STY:79.9663@LDQPVS(1.0000)APPS(1.0000)PR;
LDSPPPSPITEASEAAEAAEAGNLAVSSR	LDSPPPSPITEASEAAEAAEAGNLAVSS[79.9663]R	R	E	492	520	29	3	28S(79.9663)	sp|Q9C0C2|TB182_HUMAN	Q9C0C2	TB182_HUMAN	TNKS1BP1	182 kDa tankyrase-1-binding protein			1	0	MS/MS	STY:79.9663@LDS(0.2272)PPPS(0.1899)PIT(0.1751)EAS(0.1225)EAAEAAEAGNLAVS(0.0062)S(0.2791)R;
LDSQPQETSPELPR	LDSQPQETS[79.9663]PELPR	R	R	407	420	14	2	9S(79.9663)	sp|O14545|TRAD1_HUMAN	O14545	TRAD1_HUMAN	TRAFD1	TRAF-type zinc finger domain-containing protein 1			1	5024200	MS/MS	STY:79.9663@LDS(0.1212)QPQET(0.1212)S(0.7575)PELPR;
LDSQPQETSPELPR	LDSQPQET[79.9663]SPELPR	R	R	407	420	14	2	8T(79.9663)	sp|O14545|TRAD1_HUMAN	O14545	TRAD1_HUMAN	TRAFD1	TRAF-type zinc finger domain-containing protein 1			2	5024200	MS/MS	STY:79.9663@LDS(0.0254)QPQET(0.4873)S(0.4873)PELPR;
LDSSPSVSSTLAAK	LDSSPSVSS[79.9663]TLAAK	K	D	1187	1200	14	2	9S(79.9663)	sp|Q13428-6|TCOF_HUMAN	Q13428-6	TCOF_HUMAN	TCOF1	Isoform 6 of Treacle protein		sp|Q13428-2|TCOF_HUMAN, sp|Q13428-3|TCOF_HUMAN, sp|Q13428-4|TCOF_HUMAN, sp|Q13428-7|TCOF_HUMAN, sp|Q13428-8|TCOF_HUMAN, sp|Q13428|TCOF_HUMAN	1	4784991	MS/MS	STY:79.9663@LDS(0.1088)S(0.1088)PS(0.1088)VS(0.1088)S(0.2823)T(0.2823)LAAK;
LDSSPSVSSTLAAK	LDSSPS[79.9663]VSSTLAAK	K	D	1187	1200	14	2	6S(79.9663)	sp|Q13428-6|TCOF_HUMAN	Q13428-6	TCOF_HUMAN	TCOF1	Isoform 6 of Treacle protein		sp|Q13428-2|TCOF_HUMAN, sp|Q13428-3|TCOF_HUMAN, sp|Q13428-4|TCOF_HUMAN, sp|Q13428-7|TCOF_HUMAN, sp|Q13428-8|TCOF_HUMAN, sp|Q13428|TCOF_HUMAN	1	4784991	MS/MS	STY:79.9663@LDS(0.0297)S(0.0297)PS(0.2351)VS(0.2351)S(0.2351)T(0.2351)LAAK;
LDSSPSVSSTLAAK	LDS[79.9663]SPSVSSTLAAK	K	D	1187	1200	14	2	3S(79.9663)	sp|Q13428-6|TCOF_HUMAN	Q13428-6	TCOF_HUMAN	TCOF1	Isoform 6 of Treacle protein		sp|Q13428-2|TCOF_HUMAN, sp|Q13428-3|TCOF_HUMAN, sp|Q13428-4|TCOF_HUMAN, sp|Q13428-7|TCOF_HUMAN, sp|Q13428-8|TCOF_HUMAN, sp|Q13428|TCOF_HUMAN	2	4784991	MS/MS	STY:79.9663@LDS(0.4568)S(0.4568)PS(0.0268)VS(0.0199)S(0.0199)T(0.0199)LAAK;
LEDAESSNPNLQSLLSTDALPSASK	LEDAESSNPNLQS[79.9663]LLSTDALPSASK	K	G	160	184	25	3	13S(79.9663)	sp|Q9Y294|ASF1A_HUMAN	Q9Y294	ASF1A_HUMAN	ASF1A	Histone chaperone ASF1A			1	0	MS/MS	STY:79.9663@LEDAES(0.0481)S(0.0059)NPNLQS(0.1892)LLS(0.1892)T(0.1892)DALPS(0.1892)AS(0.1892)K;
LEDSEVRSVASNQSEMEFSSLQDMPK	LEDS[79.9663]EVRSVASNQSEMEFS[79.9663]SLQDMPK	K	E	668	693	26	3	19S(79.9663),4S(79.9663)	sp|Q8N163-2|CCAR2_HUMAN	Q8N163-2	CCAR2_HUMAN	CCAR2	Isoform 2 of Cell cycle and apoptosis regulator protein 2		sp|Q8N163|CCAR2_HUMAN	1	0	MS/MS	STY:79.9663@LEDS(0.5855)EVRS(0.1479)VAS(0.1479)NQS(0.0972)EMEFS(0.5107)S(0.5107)LQDMPK;
LELQGPRGSPNAR	LELQGPRGS[79.9663]PNAR	R	S	555	567	13	2,3	9S(79.9663)	sp|P19338|NUCL_HUMAN	P19338	NUCL_HUMAN	NCL	Nucleolin			6	1.28404704E8	MS/MS	STY:79.9663@LELQGPRGS(1.0000)PNAR;
LENEGSDEDIETDVLYSPQMALK	LENEGS[79.9663]DEDIETDVLYSPQMALK	K	L	359	381	23	3	6S(79.9663)	sp|O60502-3|OGA_HUMAN	O60502-3	OGA_HUMAN	OGA	Isoform 3 of Protein O-GlcNAcase		sp|O60502|OGA_HUMAN	1	0	MS/MS	STY:79.9663@LENEGS(0.8275)DEDIET(0.0575)DVLY(0.0575)S(0.0575)PQMALK;
LESLYSDEEDESAVGADK	LES[79.9663]LYSDEEDESAVGADK	R	I	962	979	18	2	3S(79.9663)	sp|Q9UP95-2|S12A4_HUMAN	Q9UP95-2	S12A4_HUMAN	SLC12A4	Isoform 2 of Solute carrier family 12 member 4		sp|Q9UP95-3|S12A4_HUMAN, sp|Q9UP95-5|S12A4_HUMAN, sp|Q9UP95-6|S12A4_HUMAN, sp|Q9UP95-7|S12A4_HUMAN, sp|Q9UP95|S12A4_HUMAN	1	0	MS/MS	STY:79.9663@LES(0.3278)LY(0.3278)S(0.3278)DEEDES(0.0167)AVGADK;
LFDEEEDSSEK	LFDEEEDSS[79.9663]EK	K	L	706	716	11	2	9S(79.9663)	sp|O43719|HTSF1_HUMAN	O43719	HTSF1_HUMAN	HTATSF1	HIV Tat-specific factor 1			1	4.56024e+06	MS/MS	STY:79.9663@LFDEEEDS(0.2927)S(0.7073)EK;
LFDEEEDSSEK	LFDEEEDS[79.9663]SEK	K	L	706	716	11	2	8S(79.9663)	sp|O43719|HTSF1_HUMAN	O43719	HTSF1_HUMAN	HTATSF1	HIV Tat-specific factor 1			1	4.56024e+06	MS/MS	STY:79.9663@LFDEEEDS(0.9240)S(0.0760)EK;
LFEDDDSNEK	LFEDDDS[79.9663]NEK	K	L	696	705	10	2	7S(79.9663)	sp|O43719|HTSF1_HUMAN	O43719	HTSF1_HUMAN	HTATSF1	HIV Tat-specific factor 1			4	1.3908602E7	MS/MS	STY:79.9663@LFEDDDS(1.0000)NEK;
LFEESDDKEDEDADGK	LFEES[79.9663]DDKEDEDADGK	K	E	672	687	16	2	5S(79.9663)	sp|O43719|HTSF1_HUMAN	O43719	HTSF1_HUMAN	HTATSF1	HIV Tat-specific factor 1			1	9812584	MS/MS	STY:79.9663@LFEES(1.0000)DDKEDEDADGK;
LFEESDDKEDEDADGKEVEDADEK	LFEES[79.9663]DDKEDEDADGKEVEDADEK	K	L	672	695	24	3	5S(79.9663)	sp|O43719|HTSF1_HUMAN	O43719	HTSF1_HUMAN	HTATSF1	HIV Tat-specific factor 1			1	1.3366552E7	MS/MS	STY:79.9663@LFEES(1.0000)DDKEDEDADGKEVEDADEK;
LGAGEGGEASVSPEK	LGAGEGGEAS[79.9663]VSPEK	K	T	1329	1343	15	2	10S(79.9663)	sp|Q13428-6|TCOF_HUMAN	Q13428-6	TCOF_HUMAN	TCOF1	Isoform 6 of Treacle protein		sp|Q13428-2|TCOF_HUMAN, sp|Q13428-3|TCOF_HUMAN, sp|Q13428-4|TCOF_HUMAN, sp|Q13428-7|TCOF_HUMAN, sp|Q13428-8|TCOF_HUMAN, sp|Q13428|TCOF_HUMAN	5	9480676	MS/MS	STY:79.9663@LGAGEGGEAS(0.5000)VS(0.5000)PEK;
LGAGGGSPEKSPSAQELK	LGAGGGSPEKS[79.9663]PS[79.9663]AQELK	R	E	13	30	18	2	11S(79.9663),13S(79.9663)	sp|Q9UNE7|CHIP_HUMAN	Q9UNE7	CHIP_HUMAN	STUB1	E3 ubiquitin-protein ligase CHIP			1	0	MS/MS	STY:79.9663@LGAGGGS(0.2706)PEKS(0.8647)PS(0.8647)AQELK;
LGAGGGSPEK	LGAGGGS[79.9663]PEK	R	S	13	22	10	2	7S(79.9663)	sp|Q9UNE7|CHIP_HUMAN	Q9UNE7	CHIP_HUMAN	STUB1	E3 ubiquitin-protein ligase CHIP			2	435148	MS/MS	STY:79.9663@LGAGGGS(1.0000)PEK;
LGAPENSGISTLER	LGAPENSGIS[79.9663]TLER	R	G	14	27	14	2	10S(79.9663)	sp|Q9Y4F1-2|FARP1_HUMAN	Q9Y4F1-2	FARP1_HUMAN	FARP1	Isoform 2 of FERM, ARHGEF and pleckstrin domain-containing protein 1		sp|Q9Y4F1-3|FARP1_HUMAN, sp|Q9Y4F1|FARP1_HUMAN	2	6880648	MS/MS	STY:79.9663@LGAPENS(0.0352)GIS(0.4824)T(0.4824)LER;
LGAPENSGISTLER	LGAPENS[79.9663]GISTLER	R	G	14	27	14	2	7S(79.9663)	sp|Q9Y4F1-2|FARP1_HUMAN	Q9Y4F1-2	FARP1_HUMAN	FARP1	Isoform 2 of FERM, ARHGEF and pleckstrin domain-containing protein 1		sp|Q9Y4F1-3|FARP1_HUMAN, sp|Q9Y4F1|FARP1_HUMAN	1	4056368	MS/MS	STY:79.9663@LGAPENS(0.3333)GIS(0.3333)T(0.3333)LER;
LGASNSPGQPNSVK	LGASNSPGQPNS[79.9663]VK	K	R	672	685	14	2	12S(79.9663)	sp|P49756|RBM25_HUMAN	P49756	RBM25_HUMAN	RBM25	RNA-binding protein 25			1	0	MS/MS	STY:79.9663@LGAS(0.0746)NS(0.2411)PGQPNS(0.6843)VK;
LGASNSPGQPNSVK	LGASNS[79.9663]PGQPNSVK	K	R	672	685	14	2	6S(79.9663)	sp|P49756|RBM25_HUMAN	P49756	RBM25_HUMAN	RBM25	RNA-binding protein 25			1	6448249	MS/MS	STY:79.9663@LGAS(0.0768)NS(0.8874)PGQPNS(0.0358)VK;
LGASNSPGQPNSVK	LGAS[79.9663]NSPGQPNSVK	K	R	672	685	14	2	4S(79.9663)	sp|P49756|RBM25_HUMAN	P49756	RBM25_HUMAN	RBM25	RNA-binding protein 25			1	6448249	MS/MS	STY:79.9663@LGAS(0.4859)NS(0.4859)PGQPNS(0.0283)VK;
LGDVSPTQIDVSQFGSFK	LGDVSPTQIDVSQFGS[79.9663]FK	K	E	1497	1514	18	2	16S(79.9663)	sp|P46821|MAP1B_HUMAN	P46821	MAP1B_HUMAN	MAP1B	Microtubule-associated protein 1B			1	0	MS/MS	STY:79.9663@LGDVS(0.0276)PT(0.0364)QIDVS(0.0364)QFGS(0.8996)FK;
LGGDEDGYEEEEDENSRQSEDDDSETEKPEADDPK	LGGDEDGYEEEEDENS[79.9663]RQS[79.9663]EDDDSETEKPEADDPK	R	D	54	88	35	3	16S(79.9663),19S(79.9663)	sp|Q9UHR5|S30BP_HUMAN	Q9UHR5	S30BP_HUMAN	SAP30BP	SAP30-binding protein			1	3.58627e+06	MS/MS	STY:79.9663@LGGDEDGY(0.1871)EEEEDENS(0.5648)RQS(0.5648)EDDDS(0.5648)ET(0.1184)EKPEADDPK;
LGGDEDGYEEEEDENSRQSEDDDSETEKPEADDPK	LGGDEDGY[79.9663]EEEEDENS[79.9663]RQSEDDDSETEKPEADDPK	R	D	54	88	35	4	16S(79.9663),8Y(79.9663)	sp|Q9UHR5|S30BP_HUMAN	Q9UHR5	S30BP_HUMAN	SAP30BP	SAP30-binding protein			1	1.63777e+06	MS/MS	STY:79.9663@LGGDEDGY(0.4000)EEEEDENS(0.4000)RQS(0.4000)EDDDS(0.4000)ET(0.4000)EKPEADDPK;
LGGLRPESPESLTSVSR	LGGLRPESPESLT[79.9663]SVSR	R	T	11	27	17	2	13T(79.9663)	sp|Q9H6F5|CCD86_HUMAN	Q9H6F5	CCD86_HUMAN	CCDC86	Coiled-coil domain-containing protein 86			1	1.5282413E7	MS/MS	STY:79.9663@LGGLRPES(0.0283)PES(0.0701)LT(0.3005)S(0.3005)VS(0.3005)R;
LGGLRPESPESLTSVSR	LGGLRPESPES[79.9663]LTSVSR	R	T	11	27	17	2	11S(79.9663)	sp|Q9H6F5|CCD86_HUMAN	Q9H6F5	CCD86_HUMAN	CCDC86	Coiled-coil domain-containing protein 86			1	1.4505778E7	MS/MS	STY:79.9663@LGGLRPES(0.0154)PES(0.3253)LT(0.3253)S(0.3253)VS(0.0087)R;
LGGLRPESPESLTSVSR	LGGLRPES[79.9663]PESLTSVSR	R	T	11	27	17	2	8S(79.9663)	sp|Q9H6F5|CCD86_HUMAN	Q9H6F5	CCD86_HUMAN	CCDC86	Coiled-coil domain-containing protein 86			2	1.4505778E7	MS/MS	STY:79.9663@LGGLRPES(0.8799)PES(0.0321)LT(0.0321)S(0.0279)VS(0.0279)R;
LGHPEALSAGTGSPQPPSFTYAQQR	LGHPEALSAGTGS[79.9663]PQPPSFTYAQQR	K	E	139	163	25	3	13S(79.9663)	sp|Q15942-2|ZYX_HUMAN	Q15942-2	ZYX_HUMAN	ZYX	Isoform 2 of Zyxin		sp|Q15942|ZYX_HUMAN	1	4896768	MS/MS	STY:79.9663@LGHPEALS(0.0444)AGT(0.0444)GS(0.7704)PQPPS(0.0469)FT(0.0469)Y(0.0469)AQQR;
LGHPEALSAGTGSPQPPSFTYAQQR	LGHPEALS[79.9663]AGTGSPQPPSFTYAQQR	K	E	139	163	25	3	8S(79.9663)	sp|Q15942-2|ZYX_HUMAN	Q15942-2	ZYX_HUMAN	ZYX	Isoform 2 of Zyxin		sp|Q15942|ZYX_HUMAN	1	4896768	MS/MS	STY:79.9663@LGHPEALS(0.6295)AGT(0.1617)GS(0.1617)PQPPS(0.0157)FT(0.0157)Y(0.0157)AQQR;
LGIAVIHGEAQDAESDLVDGRHSPPMVR	LGIAVIHGEAQDAES[79.9663]DLVDGRHSPPMVR	R	S	165	192	28	4	15S(79.9663)	sp|O60256-2|KPRB_HUMAN	O60256-2	KPRB_HUMAN	PRPSAP2	Isoform 2 of Phosphoribosyl pyrophosphate synthase-associated protein 2		sp|O60256-3|KPRB_HUMAN, sp|O60256-4|KPRB_HUMAN, sp|O60256|KPRB_HUMAN	1	7406292	MS/MS	STY:79.9663@LGIAVIHGEAQDAES(0.6547)DLVDGRHS(0.3453)PPMVR;
LGRETEEQDSDSAEQGDPAGEGK	LGRETEEQDS[79.9663]DSAEQGDPAGEGK	K	E	51	73	23	3	10S(79.9663)	sp|O95361|TRI16_HUMAN	O95361	TRI16_HUMAN	TRIM16	Tripartite motif-containing protein 16			2	1.2178968E7	MS/MS	STY:79.9663@LGRET(0.0204)EEQDS(0.4898)DS(0.4898)AEQGDPAGEGK;
LGRETEEQDSDSAEQGDPAGEGK	LGRET[79.9663]EEQDSDSAEQGDPAGEGK	K	E	51	73	23	3	5T(79.9663)	sp|O95361|TRI16_HUMAN	O95361	TRI16_HUMAN	TRIM16	Tripartite motif-containing protein 16			2	1.2178968E7	MS/MS	STY:79.9663@LGRET(0.3333)EEQDS(0.3333)DS(0.3333)AEQGDPAGEGK;
LGSVLSPESPKPTPLTPLEPQK	LGSVLSPES[79.9663]PKPTPLTPLEPQK	K	P	137	158	22	3	9S(79.9663)	sp|Q96JM3|CHAP1_HUMAN	Q96JM3	CHAP1_HUMAN	CHAMP1	Chromosome alignment-maintaining phosphoprotein 1			1	0	MS/MS	STY:79.9663@LGS(0.1118)VLS(0.0491)PES(0.6274)PKPT(0.1058)PLT(0.1058)PLEPQK;
LGVSVSPSR	LGVS[79.9663]VSPSR	K	A	529	537	9	2	4S(79.9663)	sp|Q86VM9|ZCH18_HUMAN	Q86VM9	ZCH18_HUMAN	ZC3H18	Zinc finger CCCH domain-containing protein 18			2	3.85148e+06	MS/MS	STY:79.9663@LGVS(0.3333)VS(0.3333)PS(0.3333)R;
LHGGFDSDCSEDGEALNGEPELDLTSK	LHGGFDS[79.9663]DC[57.0215]S[79.9663]EDGEALNGEPELDLTSK	R	L	38	64	27	3	10S(79.9663),7S(79.9663),9C(57.0215)	sp|O00178|GTPB1_HUMAN	O00178	GTPB1_HUMAN	GTPBP1	GTP-binding protein 1			2	5761827	MS/MS	STY:79.9663@LHGGFDS(0.9227)DCS(0.9227)EDGEALNGEPELDLT(0.0773)S(0.0773)K;
LIRPEYAWIVQPVSGAVYDRPGASPK	LIRPEYAWIVQPVSGAVYDRPGAS[79.9663]PK	R	R	1134	1159	26	3,4	24S(79.9663)	sp|Q12769|NU160_HUMAN	Q12769	NU160_HUMAN	NUP160	Nuclear pore complex protein Nup160			5	1.1820518E7	MS/MS	STY:79.9663@LIRPEY(0.0243)AWIVQPVS(0.0285)GAVY(0.0350)DRPGAS(0.9121)PK;
LIRPEYAWIVQPVSGAVYDRPGASPK	LIRPEYAWIVQPVSGAVY[79.9663]DRPGASPK	R	R	1134	1159	26	3	18Y(79.9663)	sp|Q12769|NU160_HUMAN	Q12769	NU160_HUMAN	NUP160	Nuclear pore complex protein Nup160			1	0	MS/MS	STY:79.9663@LIRPEY(0.0391)AWIVQPVS(0.0312)GAVY(0.8089)DRPGAS(0.1208)PK;
LIRPEYAWIVQPVSGAVYDRPGASPK	LIRPEY[79.9663]AWIVQPVSGAVYDRPGASPK	R	R	1134	1159	26	3	6Y(79.9663)	sp|Q12769|NU160_HUMAN	Q12769	NU160_HUMAN	NUP160	Nuclear pore complex protein Nup160			1	8785963	MS/MS	STY:79.9663@LIRPEY(0.4158)AWIVQPVS(0.4158)GAVY(0.0842)DRPGAS(0.0842)PK;
LKEDILENEDEQNSPPKK	LKEDILENEDEQNS[79.9663]PPKK	R	G	1270	1287	18	3	14S(79.9663)	sp|Q9NTI5|PDS5B_HUMAN	Q9NTI5	PDS5B_HUMAN	PDS5B	Sister chromatid cohesion protein PDS5 homolog B		sp|Q9NTI5-2|PDS5B_HUMAN, sp|Q9NTI5-5|PDS5B_HUMAN	2	3521085	MS/MS	STY:79.9663@LKEDILENEDEQNS(1.0000)PPKK;
LKFSDDEEEEEVVK	LKFS[79.9663]DDEEEEEVVK	K	D	385	398	14	2	4S(79.9663)	sp|Q5JSZ5|PRC2B_HUMAN	Q5JSZ5	PRC2B_HUMAN	PRRC2B	Protein PRRC2B		sp|Q5JSZ5-5|PRC2B_HUMAN	1	3.86241e+06	MS/MS	STY:79.9663@LKFS(1.0000)DDEEEEEVVK;
LKLSPSPSSR	LKLS[79.9663]PSPSSR	R	V	388	397	10	2	4S(79.9663)	sp|P20700|LMNB1_HUMAN	P20700	LMNB1_HUMAN	LMNB1	Lamin-B1	LMNB2	sp|Q03252|LMNB2_HUMAN	2	2693648	MS/MS	STY:79.9663@LKLS(0.4498)PS(0.4498)PS(0.0502)S(0.0502)R;
LKLSPSPSSR	LKLS[79.9663]PSPS[79.9663]SR	R	V	388	397	10	2	4S(79.9663),8S(79.9663)	sp|P20700|LMNB1_HUMAN	P20700	LMNB1_HUMAN	LMNB1	Lamin-B1	LMNB2	sp|Q03252|LMNB2_HUMAN	1	1.432652E7	MS/MS	STY:79.9663@LKLS(0.6163)PS(0.2341)PS(0.5748)S(0.5748)R;
LKLSPSPSSR	LKLS[79.9663]PS[79.9663]PSSR	R	V	388	397	10	2	4S(79.9663),6S(79.9663)	sp|P20700|LMNB1_HUMAN	P20700	LMNB1_HUMAN	LMNB1	Lamin-B1	LMNB2	sp|Q03252|LMNB2_HUMAN	2	1.4377857E7	MS/MS	STY:79.9663@LKLS(0.9278)PS(0.9278)PS(0.0722)S(0.0722)R;
LKSEDGVEGDLGETQSR	LKS[79.9663]EDGVEGDLGETQSR	R	T	133	149	17	2	3S(79.9663)	sp|Q09666|AHNK_HUMAN	Q09666	AHNK_HUMAN	AHNAK	Neuroblast differentiation-associated protein AHNAK			5	2.1817932E7	MS/MS	STY:79.9663@LKS(0.9255)EDGVEGDLGET(0.0372)QS(0.0372)R;
LLEDGEDFNLGDALDSSNSMQTIQK	LLEDGEDFNLGDALDS[79.9663]SNSMQTIQK	R	T	383	407	25	3	16S(79.9663)	sp|P05783|K1C18_HUMAN	P05783	K1C18_HUMAN	KRT18	Keratin, type I cytoskeletal 18			1	0	MS/MS	STY:79.9663@LLEDGEDFNLGDALDS(0.2500)S(0.2500)NS(0.2500)MQT(0.2500)IQK;
LLEDSEESSEETVSR	LLEDS[79.9663]EESSEETVSR	R	A	99	113	15	2	5S(79.9663)	sp|O60231|DHX16_HUMAN	O60231	DHX16_HUMAN	DHX16	Pre-mRNA-splicing factor ATP-dependent RNA helicase DHX16			1	0	MS/MS	STY:79.9663@LLEDS(0.4675)EES(0.4675)S(0.0217)EET(0.0217)VS(0.0217)R;
LLEDSEESSEETVSR	LLEDS[79.9663]EES[79.9663]SEETVSR	R	A	99	113	15	2	5S(79.9663),8S(79.9663)	sp|O60231|DHX16_HUMAN	O60231	DHX16_HUMAN	DHX16	Pre-mRNA-splicing factor ATP-dependent RNA helicase DHX16			2	0	MS/MS	STY:79.9663@LLEDS(0.4914)EES(0.4914)S(0.4914)EET(0.4914)VS(0.0344)R;
LLEGEESRISLPLPNFSSLNLR	LLEGEESRISLPLPNFS[79.9663]SLNLR	K	E	403	424	22	3	17S(79.9663)	sp|P08670|VIME_HUMAN	P08670	VIME_HUMAN	VIM	Vimentin			1	0	MS/MS	STY:79.9663@LLEGEES(0.1303)RIS(0.2184)LPLPNFS(0.3256)S(0.3256)LNLR;
LLEGEESRISLPLPNFSSLNLR	LLEGEES[79.9663]RISLPLPNFSSLNLR	K	E	403	424	22	3	7S(79.9663)	sp|P08670|VIME_HUMAN	P08670	VIME_HUMAN	VIM	Vimentin			1	0	MS/MS	STY:79.9663@LLEGEES(0.7473)RIS(0.1809)LPLPNFS(0.0359)S(0.0359)LNLR;
LLGDSDSEEEQK	LLGDS[79.9663]DS[79.9663]EEEQK	R	E	285	296	12	2	5S(79.9663),7S(79.9663)	sp|Q9BW71|HIRP3_HUMAN	Q9BW71	HIRP3_HUMAN	HIRIP3	HIRA-interacting protein 3			2	3.85121e+06	MS/MS	STY:79.9663@LLGDS(1.0000)DS(1.0000)EEEQK;
LLKPGEEPSEYTDEEDTK	LLKPGEEPSEYTDEEDT[79.9663]K	R	D	224	241	18	2,3	17T(79.9663)	sp|O15173-2|PGRC2_HUMAN	O15173-2	PGRC2_HUMAN	PGRMC2	Isoform 2 of Membrane-associated progesterone receptor component 2		sp|O15173|PGRC2_HUMAN	3	1.15440976E8	MS/MS	STY:79.9663@LLKPGEEPS(0.0583)EY(0.0583)T(0.0583)DEEDT(0.8252)K;
LLKPGEEPSEYTDEEDTK	LLKPGEEPSEYT[79.9663]DEEDTK	R	D	224	241	18	2,3	12T(79.9663)	sp|O15173-2|PGRC2_HUMAN	O15173-2	PGRC2_HUMAN	PGRMC2	Isoform 2 of Membrane-associated progesterone receptor component 2		sp|O15173|PGRC2_HUMAN	2	1.14980336E8	MS/MS	STY:79.9663@LLKPGEEPS(0.0209)EY(0.0216)T(0.9051)DEEDT(0.0524)K;
LLKPGEEPSEYTDEEDTK	LLKPGEEPS[79.9663]EYTDEEDTK	R	D	224	241	18	2,3	9S(79.9663)	sp|O15173-2|PGRC2_HUMAN	O15173-2	PGRC2_HUMAN	PGRMC2	Isoform 2 of Membrane-associated progesterone receptor component 2		sp|O15173|PGRC2_HUMAN	4	1.15440976E8	MS/MS	STY:79.9663@LLKPGEEPS(0.9218)EY(0.0261)T(0.0261)DEEDT(0.0261)K;
LLLAEDSEEEVDFLSER	LLLAEDS[79.9663]EEEVDFLSER	R	R	162	178	17	2	7S(79.9663)	sp|Q14676-3|MDC1_HUMAN	Q14676-3	MDC1_HUMAN	MDC1	Isoform 3 of Mediator of DNA damage checkpoint protein 1		sp|Q14676-2|MDC1_HUMAN, sp|Q14676-4|MDC1_HUMAN, sp|Q14676|MDC1_HUMAN	2	0	MS/MS	STY:79.9663@LLLAEDS(0.9346)EEEVDFLS(0.0654)ER;
LLRDDEAHLQEDQGEEECFHDCSASFEEEPGADK	LLRDDEAHLQEDQGEEEC[57.0215]FHDC[57.0215]S[79.9663]ASFEEEPGADK	K	V	45	78	34	4	18C(57.0215),22C(57.0215),23S(79.9663)	sp|Q99614|TTC1_HUMAN	Q99614	TTC1_HUMAN	TTC1	Tetratricopeptide repeat protein 1			1	1.28252e+06	MS/MS	STY:79.9663@LLRDDEAHLQEDQGEEECFHDCS(0.5000)AS(0.5000)FEEEPGADK;
LLSPRPSLLTPTGDPR	LLS[79.9663]PRPSLLTPTGDPR	R	A	920	935	16	3	3S(79.9663)	sp|Q9Y618-4|NCOR2_HUMAN	Q9Y618-4	NCOR2_HUMAN	NCOR2	Isoform 3 of Nuclear receptor corepressor 2		sp|Q9Y618-5|NCOR2_HUMAN, sp|Q9Y618|NCOR2_HUMAN	1	429624	MS/MS	STY:79.9663@LLS(0.2500)PRPS(0.2500)LLT(0.2500)PT(0.2500)GDPR;
LMHNASDSEVDQDDVVEWK	LMHNAS[79.9663]DS[79.9663]EVDQDDVVEWK	K	D	948	966	19	3	6S(79.9663),8S(79.9663)	sp|Q9H2P0|ADNP_HUMAN	Q9H2P0	ADNP_HUMAN	ADNP	Activity-dependent neuroprotector homeobox protein			1	0	MS/MS	STY:79.9663@LMHNAS(1.0000)DS(1.0000)EVDQDDVVEWK;
LMHSSSLTNSSIPR	LMHS[79.9663]SSLTNSSIPR	K	F	240	253	14	2	4S(79.9663)	sp|Q08499-10|PDE4D_HUMAN	Q08499-10	PDE4D_HUMAN	PDE4D	Isoform 9 of cAMP-specific 3',5'-cyclic phosphodiesterase 4D		sp|Q08499-11|PDE4D_HUMAN, sp|Q08499-2|PDE4D_HUMAN, sp|Q08499-3|PDE4D_HUMAN, sp|Q08499-4|PDE4D_HUMAN, sp|Q08499-5|PDE4D_HUMAN, sp|Q08499-6|PDE4D_HUMAN, sp|Q08499-8|PDE4D_HUMAN, sp|Q08499-9|PDE4D_HUMAN, sp|Q08499|PDE4D_HUMAN	1	0	MS/MS	STY:79.9663@LMHS(0.1667)S(0.1667)S(0.1667)LT(0.1667)NS(0.1667)S(0.1667)IPR;
LMKPPSPEHQSLDTQQEGGEEEVGPVAQQAIAVAEPSTSECLR	LMKPPS[79.9663]PEHQSLDTQQEGGEEEVGPVAQQAIAVAEPSTSEC[57.0215]LR	R	I	789	831	43	4	41C(57.0215),6S(79.9663)	sp|Q9Y6X9-2|MORC2_HUMAN	Q9Y6X9-2	MORC2_HUMAN	MORC2	Isoform 2 of ATPase MORC2		sp|Q9Y6X9|MORC2_HUMAN	1	1.53259e+06	MS/MS	STY:79.9663@LMKPPS(0.2765)PEHQS(0.2765)LDT(0.2765)QQEGGEEEVGPVAQQAIAVAEPS(0.0568)T(0.0568)S(0.0568)ECLR;
LNHSPPQSSSR	LNHSPPQS[79.9663]SSR	R	Y	124	134	11	2	8S(79.9663)	sp|Q5T8P6-2|RBM26_HUMAN	Q5T8P6-2	RBM26_HUMAN	RBM26	Isoform 2 of RNA-binding protein 26		sp|Q5T8P6-3|RBM26_HUMAN, sp|Q5T8P6|RBM26_HUMAN	1	0	MS/MS	STY:79.9663@LNHS(0.0455)PPQS(0.7993)S(0.0776)S(0.0776)R;
LNHVAAGLVSPSLK	LNHVAAGLVS[79.9663]PSLK	K	S	198	211	14	2	10S(79.9663)	sp|Q05519-2|SRS11_HUMAN	Q05519-2	SRS11_HUMAN	SRSF11	Isoform 2 of Serine/arginine-rich splicing factor 11		sp|Q05519|SRS11_HUMAN	2	3327235	MS/MS	STY:79.9663@LNHVAAGLVS(0.9272)PS(0.0728)LK;
LPDSDDDEDEETAIQR	LPDS[79.9663]DDDEDEETAIQR	R	V	341	356	16	2	4S(79.9663)	sp|Q96K21-2|ANCHR_HUMAN	Q96K21-2	ANCHR_HUMAN	ZFYVE19	Isoform 2 of Abscission/NoCut checkpoint regulator		sp|Q96K21-3|ANCHR_HUMAN, sp|Q96K21-4|ANCHR_HUMAN, sp|Q96K21|ANCHR_HUMAN	1	1.7127e+06	MS/MS	STY:79.9663@LPDS(0.8455)DDDEDEET(0.1545)AIQR;
LPELDPRGSDEENLDSETSASTESLLEER	LPELDPRGS[79.9663]DEENLDSETSASTESLLEER	R	A	1984	2012	29	3	9S(79.9663)	sp|Q13459-2|MYO9B_HUMAN	Q13459-2	MYO9B_HUMAN	MYO9B	Isoform Short of Unconventional myosin-IXb		sp|Q13459|MYO9B_HUMAN	1	0	MS/MS	STY:79.9663@LPELDPRGS(0.4380)DEENLDS(0.4380)ET(0.0276)S(0.0276)AS(0.0276)T(0.0206)ES(0.0206)LLEER;
LPISDSPPDTQEIHVIEQEK	LPIS[79.9663]DSPPDTQEIHVIEQEK	K	L	1543	1562	20	3	4S(79.9663)	sp|Q8WYP5-2|ELYS_HUMAN	Q8WYP5-2	ELYS_HUMAN	AHCTF1	Isoform 2 of Protein ELYS		sp|Q8WYP5-3|ELYS_HUMAN, sp|Q8WYP5|ELYS_HUMAN	1	2.96557e+06	MS/MS	STY:79.9663@LPIS(0.3333)DS(0.3333)PPDT(0.3333)QEIHVIEQEK;
LPPTFFCGVCSDTDEDNGNGEDFQSELQK	LPPTFFC[57.0215]GVC[57.0215]S[79.9663]DTDEDNGNGEDFQSELQK	K	V	2731	2759	29	3	10C(57.0215),11S(79.9663),7C(57.0215)	sp|P49792|RBP2_HUMAN	P49792	RBP2_HUMAN	RANBP2	E3 SUMO-protein ligase RanBP2			1	0	MS/MS	STY:79.9663@LPPT(0.1250)FFCGVCS(0.4257)DT(0.4257)DEDNGNGEDFQS(0.0236)ELQK;
LPSGSGAASPTGSAVDIR	LPSGSGAASPT[79.9663]GSAVDIR	R	A	208	225	18	2	11T(79.9663)	sp|Q09666|AHNK_HUMAN	Q09666	AHNK_HUMAN	AHNAK	Neuroblast differentiation-associated protein AHNAK			1	1.1247291E7	MS/MS	STY:79.9663@LPS(0.1196)GS(0.1196)GAAS(0.0169)PT(0.3719)GS(0.3719)AVDIR;
LPSGSGAASPTGSAVDIR	LPSGSGAAS[79.9663]PTGSAVDIR	R	A	208	225	18	2	9S(79.9663)	sp|Q09666|AHNK_HUMAN	Q09666	AHNK_HUMAN	AHNAK	Neuroblast differentiation-associated protein AHNAK			1	1.1247291E7	MS/MS	STY:79.9663@LPS(0.0467)GS(0.0467)GAAS(0.8741)PT(0.0164)GS(0.0161)AVDIR;
LPSSSGLPAADVSPATAEEPLSPSTPTR	LPSSSGLPAADVSPATAEEPLSPSTPT[79.9663]R	K	R	1497	1524	28	3	27T(79.9663)	sp|O43149|ZZEF1_HUMAN	O43149	ZZEF1_HUMAN	ZZEF1	Zinc finger ZZ-type and EF-hand domain-containing protein 1			1	0	MS/MS	STY:79.9663@LPS(0.0352)S(0.0352)S(0.0352)GLPAADVS(0.0352)PAT(0.0352)AEEPLS(0.0352)PS(0.0352)T(0.0429)PT(0.7110)R;
LPSGSGAASPTGSAVDIR	LPS[79.9663]GSGAASPTGSAVDIR	R	A	208	225	18	2	3S(79.9663)	sp|Q09666|AHNK_HUMAN	Q09666	AHNK_HUMAN	AHNAK	Neuroblast differentiation-associated protein AHNAK			6	1.1247291E7	MS/MS	STY:79.9663@LPS(0.4833)GS(0.4833)GAAS(0.0111)PT(0.0111)GS(0.0111)AVDIR;
LPSGSGAASPTGSAVDIR	LPS[79.9663]GS[79.9663]GAASPTGSAVDIR	R	A	208	225	18	2	3S(79.9663),5S(79.9663)	sp|Q09666|AHNK_HUMAN	Q09666	AHNK_HUMAN	AHNAK	Neuroblast differentiation-associated protein AHNAK			2	4501678	MS/MS	STY:79.9663@LPS(0.4000)GS(0.4000)GAAS(0.4000)PT(0.4000)GS(0.4000)AVDIR;
LPSSPVYEDAASFK	LPS[79.9663]SPVYEDAASFK	R	A	378	391	14	2	3S(79.9663)	sp|Q14247-2|SRC8_HUMAN	Q14247-2	SRC8_HUMAN	CTTN	Isoform 2 of Src substrate cortactin		sp|Q14247-3|SRC8_HUMAN, sp|Q14247|SRC8_HUMAN	5	1.7167132E7	MS/MS	STY:79.9663@LPS(0.8723)S(0.0791)PVY(0.0243)EDAAS(0.0243)FK;
LQAALDDEEAGGRPAMEPGNGSLDLGGDSAGR	LQAALDDEEAGGRPAMEPGNGS[79.9663]LDLGGDSAGR	R	S	38	69	32	3	22S(79.9663)	sp|Q00839-2|HNRPU_HUMAN	Q00839-2	HNRPU_HUMAN	HNRNPU	Isoform 2 of Heterogeneous nuclear ribonucleoprotein U		sp|Q00839|HNRPU_HUMAN	2	0	MS/MS	STY:79.9663@LQAALDDEEAGGRPAMEPGNGS(0.9242)LDLGGDS(0.0758)AGR;
LQAALDDEEAGGRPAMEPGNGSLDLGGDSAGR	LQAALDDEEAGGRPAM[15.9949]EPGNGS[79.9663]LDLGGDSAGR	R	S	38	69	32	3	16M(15.9949),22S(79.9663)	sp|Q00839-2|HNRPU_HUMAN	Q00839-2	HNRPU_HUMAN	HNRNPU	Isoform 2 of Heterogeneous nuclear ribonucleoprotein U		sp|Q00839|HNRPU_HUMAN	1	1.88995e+06	MS/MS	STY:79.9663@LQAALDDEEAGGRPAMEPGNGS(0.7554)LDLGGDS(0.2446)AGR;M:15.9949@LQAALDDEEAGGRPAM(1.0000)EPGNGSLDLGGDSAGR;
LQAKESPQR	LQAKES[79.9663]PQR	R	K	72	80	9	2	6S(79.9663)	sp|Q15061|WDR43_HUMAN	Q15061	WDR43_HUMAN	WDR43	WD repeat-containing protein 43			1	1.50607e+06	MS/MS	STY:79.9663@LQAKES(1.0000)PQR;
LQAKESPQRK	LQAKES[79.9663]PQRK	R	K	72	81	10	2	6S(79.9663)	sp|Q15061|WDR43_HUMAN	Q15061	WDR43_HUMAN	WDR43	WD repeat-containing protein 43			1	0	MS/MS	STY:79.9663@LQAKES(1.0000)PQRK;
LQEEGGGSDEEETGSPSEDGMQSAR	LQEEGGGS[79.9663]DEEETGSPSEDGMQSAR	K	T	43	67	25	3	8S(79.9663)	sp|Q13610-2|PWP1_HUMAN	Q13610-2	PWP1_HUMAN	PWP1	Isoform 2 of Periodic tryptophan protein 1 homolog		sp|Q13610|PWP1_HUMAN	1	7.57192e+06	MS/MS	STY:79.9663@LQEEGGGS(0.2000)DEEET(0.2000)GS(0.2000)PS(0.2000)EDGMQS(0.2000)AR;
LQEEGGGSDEEETGSPSEDGMQSAR	LQEEGGGS[79.9663]DEEETGSPS[79.9663]EDGMQSAR	K	T	43	67	25	3	17S(79.9663),8S(79.9663)	sp|Q13610-2|PWP1_HUMAN	Q13610-2	PWP1_HUMAN	PWP1	Isoform 2 of Periodic tryptophan protein 1 homolog		sp|Q13610|PWP1_HUMAN	1	2896633	MS/MS	STY:79.9663@LQEEGGGS(0.4482)DEEET(0.4482)GS(0.4482)PS(0.4931)EDGMQS(0.1624)AR;
LQEEGGGSDEEETGSPSEDGMQSAR	LQEEGGGS[79.9663]DEEET[79.9663]GSPSEDGMQSAR	K	T	43	67	25	3	13T(79.9663),8S(79.9663)	sp|Q13610-2|PWP1_HUMAN	Q13610-2	PWP1_HUMAN	PWP1	Isoform 2 of Periodic tryptophan protein 1 homolog		sp|Q13610|PWP1_HUMAN	1	2896633	MS/MS	STY:79.9663@LQEEGGGS(0.4000)DEEET(0.4000)GS(0.4000)PS(0.4000)EDGMQS(0.4000)AR;
LQEEQDGGSSDEDRAGPAPPGASDGVDIQDVK	LQEEQDGGS[79.9663]S[79.9663]DEDRAGPAPPGASDGVDIQDVK	R	F	741	772	32	3	10S(79.9663),9S(79.9663)	sp|Q14147|DHX34_HUMAN	Q14147	DHX34_HUMAN	DHX34	Probable ATP-dependent RNA helicase DHX34			1	2.07929e+06	MS/MS	STY:79.9663@LQEEQDGGS(0.6667)S(0.6667)DEDRAGPAPPGAS(0.6667)DGVDIQDVK;
LQPSSSPENSLDPFPPR	LQPSSSPENS[79.9663]LDPFPPR	K	I	554	570	17	2	10S(79.9663)	sp|Q8WWM7-2|ATX2L_HUMAN	Q8WWM7-2	ATX2L_HUMAN	ATXN2L	Isoform 2 of Ataxin-2-like protein		sp|Q8WWM7-3|ATX2L_HUMAN, sp|Q8WWM7-4|ATX2L_HUMAN, sp|Q8WWM7-5|ATX2L_HUMAN, sp|Q8WWM7-6|ATX2L_HUMAN, sp|Q8WWM7-8|ATX2L_HUMAN, sp|Q8WWM7-9|ATX2L_HUMAN, sp|Q8WWM7|ATX2L_HUMAN	1	5196424	MS/MS	STY:79.9663@LQPS(0.1288)S(0.1288)S(0.1288)PENS(0.6135)LDPFPPR;
LQPSSSPENSLDPFPPR	LQPS[79.9663]SSPENSLDPFPPR	K	I	554	570	17	2	4S(79.9663)	sp|Q8WWM7-2|ATX2L_HUMAN	Q8WWM7-2	ATX2L_HUMAN	ATXN2L	Isoform 2 of Ataxin-2-like protein		sp|Q8WWM7-3|ATX2L_HUMAN, sp|Q8WWM7-4|ATX2L_HUMAN, sp|Q8WWM7-5|ATX2L_HUMAN, sp|Q8WWM7-6|ATX2L_HUMAN, sp|Q8WWM7-8|ATX2L_HUMAN, sp|Q8WWM7-9|ATX2L_HUMAN, sp|Q8WWM7|ATX2L_HUMAN	1	5.12589e+06	MS/MS	STY:79.9663@LQPS(0.3094)S(0.3094)S(0.3094)PENS(0.0718)LDPFPPR;
LQQGAGLESPQGQPEPGAASPQRQQDLHLESPQR	LQQGAGLESPQGQPEPGAASPQRQQDLHLES[79.9663]PQR	R	Q	72	105	34	3	31S(79.9663)	sp|Q9H6F5|CCD86_HUMAN	Q9H6F5	CCD86_HUMAN	CCDC86	Coiled-coil domain-containing protein 86			1	4466888	MS/MS	STY:79.9663@LQQGAGLES(0.4547)PQGQPEPGAAS(0.0614)PQRQQDLHLES(0.4840)PQR;
LQQGAGLESPQGQPEPGAASPQR	LQQGAGLESPQGQPEPGAAS[79.9663]PQR	R	Q	72	94	23	3	20S(79.9663)	sp|Q9H6F5|CCD86_HUMAN	Q9H6F5	CCD86_HUMAN	CCDC86	Coiled-coil domain-containing protein 86			3	1.4559899E7	MS/MS	STY:79.9663@LQQGAGLES(0.0606)PQGQPEPGAAS(0.9394)PQR;
LQQGAGLESPQGQPEPGAASPQRQQDLHLESPQR	LQQGAGLESPQGQPEPGAAS[79.9663]PQRQQDLHLESPQR	R	Q	72	105	34	3,4	20S(79.9663)	sp|Q9H6F5|CCD86_HUMAN	Q9H6F5	CCD86_HUMAN	CCDC86	Coiled-coil domain-containing protein 86			2	1.4863649E7	MS/MS	STY:79.9663@LQQGAGLES(0.0402)PQGQPEPGAAS(0.9228)PQRQQDLHLES(0.0370)PQR;
LQQGAGLESPQGQPEPGAASPQR	LQQGAGLES[79.9663]PQGQPEPGAASPQR	R	Q	72	94	23	3	9S(79.9663)	sp|Q9H6F5|CCD86_HUMAN	Q9H6F5	CCD86_HUMAN	CCDC86	Coiled-coil domain-containing protein 86			2	1.4559899E7	MS/MS	STY:79.9663@LQQGAGLES(0.8186)PQGQPEPGAAS(0.1814)PQR;
LQQGAGLESPQGQPEPGAASPQRQQDLHLESPQR	LQQGAGLES[79.9663]PQGQPEPGAASPQRQQDLHLESPQR	R	Q	72	105	34	4	9S(79.9663)	sp|Q9H6F5|CCD86_HUMAN	Q9H6F5	CCD86_HUMAN	CCDC86	Coiled-coil domain-containing protein 86			1	1.0490276E7	MS/MS	STY:79.9663@LQQGAGLES(0.5867)PQGQPEPGAAS(0.3778)PQRQQDLHLES(0.0355)PQR;
LQQGAGLESPQGQPEPGAASPQR	LQQGAGLES[79.9663]PQGQPEPGAAS[79.9663]PQR	R	Q	72	94	23	3	20S(79.9663),9S(79.9663)	sp|Q9H6F5|CCD86_HUMAN	Q9H6F5	CCD86_HUMAN	CCDC86	Coiled-coil domain-containing protein 86			1	1.13878e+06	MS/MS	STY:79.9663@LQQGAGLES(1.0000)PQGQPEPGAAS(1.0000)PQR;
LQQQHSEQPPLQPSPVMTR	LQQQHSEQPPLQPS[79.9663]PVMTR	R	R	130	148	19	3	14S(79.9663)	sp|Q5JTV8-2|TOIP1_HUMAN	Q5JTV8-2	TOIP1_HUMAN	TOR1AIP1	Isoform 2 of Torsin-1A-interacting protein 1		sp|Q5JTV8-3|TOIP1_HUMAN, sp|Q5JTV8-4|TOIP1_HUMAN, sp|Q5JTV8|TOIP1_HUMAN	2	6504828	MS/MS	STY:79.9663@LQQQHS(0.0249)EQPPLQPS(0.4875)PVMT(0.4875)R;
LQQQHSEQPPLQPSPVMTR	LQQQHS[79.9663]EQPPLQPSPVMTR	R	R	130	148	19	3	6S(79.9663)	sp|Q5JTV8-2|TOIP1_HUMAN	Q5JTV8-2	TOIP1_HUMAN	TOR1AIP1	Isoform 2 of Torsin-1A-interacting protein 1		sp|Q5JTV8-3|TOIP1_HUMAN, sp|Q5JTV8-4|TOIP1_HUMAN, sp|Q5JTV8|TOIP1_HUMAN	1	6504828	MS/MS	STY:79.9663@LQQQHS(0.6149)EQPPLQPS(0.1926)PVMT(0.1926)R;
LQTTDNLLPMSPEEFDEVSR	LQTTDNLLPMSPEEFDEVS[79.9663]R	R	I	717	736	20	3	19S(79.9663)	sp|P42224|STAT1_HUMAN	P42224	STAT1_HUMAN	STAT1	Signal transducer and activator of transcription 1-alpha/beta			1	0	MS/MS	STY:79.9663@LQT(0.0290)T(0.0290)DNLLPMS(0.0443)PEEFDEVS(0.8977)R;
LREQGTESRSSTPLPTISSSAENTR	LREQGTESRSS[79.9663]T[79.9663]PLPTISSSAENTR	K	Q	149	173	25	3	11S(79.9663),12T(79.9663)	sp|P42167-2|LAP2B_HUMAN	P42167-2	LAP2B_HUMAN	TMPO	Isoform Gamma of Lamina-associated polypeptide 2, isoforms beta/gamma		sp|P42166|LAP2A_HUMAN, sp|P42167-3|LAP2B_HUMAN, sp|P42167|LAP2B_HUMAN	1	1.8211152E7	MS/MS	STY:79.9663@LREQGT(0.0210)ES(0.0210)RS(0.0210)S(0.9227)T(0.9227)PLPT(0.0153)IS(0.0191)S(0.0191)S(0.0191)AENT(0.0191)R;
LRLSPSPTSQR	LRLSPSPTS[79.9663]QR	R	S	387	397	11	2	9S(79.9663)	sp|P02545|LMNA_HUMAN	P02545	LMNA_HUMAN	LMNA	Prelamin-A/C		sp|P02545-2|LMNA_HUMAN, sp|P02545-3|LMNA_HUMAN, sp|P02545-4|LMNA_HUMAN, sp|P02545-5|LMNA_HUMAN, sp|P02545-6|LMNA_HUMAN	1	2.1906958E7	MS/MS	STY:79.9663@LRLS(0.0948)PS(0.0948)PT(0.0948)S(0.7155)QR;
LRLSPSPTSQR	LRLSPS[79.9663]PTS[79.9663]QR	R	S	387	397	11	2	6S(79.9663),9S(79.9663)	sp|P02545|LMNA_HUMAN	P02545	LMNA_HUMAN	LMNA	Prelamin-A/C		sp|P02545-2|LMNA_HUMAN, sp|P02545-3|LMNA_HUMAN, sp|P02545-4|LMNA_HUMAN, sp|P02545-5|LMNA_HUMAN, sp|P02545-6|LMNA_HUMAN	1	0	MS/MS	STY:79.9663@LRLS(0.3019)PS(0.5510)PT(0.5510)S(0.5961)QR;
LRLSPSPTSQR	LRLSPS[79.9663]PT[79.9663]SQR	R	S	387	397	11	2	6S(79.9663),8T(79.9663)	sp|P02545|LMNA_HUMAN	P02545	LMNA_HUMAN	LMNA	Prelamin-A/C		sp|P02545-2|LMNA_HUMAN, sp|P02545-3|LMNA_HUMAN, sp|P02545-4|LMNA_HUMAN, sp|P02545-5|LMNA_HUMAN, sp|P02545-6|LMNA_HUMAN	2	2.92484224E8	MS/MS	STY:79.9663@LRLS(0.0509)PS(0.6497)PT(0.6497)S(0.6497)QR;
LRLSPSPTSQR	LRLS[79.9663]PSPTSQR	R	S	387	397	11	2,3	4S(79.9663)	sp|P02545|LMNA_HUMAN	P02545	LMNA_HUMAN	LMNA	Prelamin-A/C		sp|P02545-2|LMNA_HUMAN, sp|P02545-3|LMNA_HUMAN, sp|P02545-4|LMNA_HUMAN, sp|P02545-5|LMNA_HUMAN, sp|P02545-6|LMNA_HUMAN	6	1.08235872E8	MS/MS	STY:79.9663@LRLS(0.9237)PS(0.0261)PT(0.0261)S(0.0241)QR;
LRLSPSPTSQR	LRLS[79.9663]PSPTS[79.9663]QR	R	S	387	397	11	2	4S(79.9663),9S(79.9663)	sp|P02545|LMNA_HUMAN	P02545	LMNA_HUMAN	LMNA	Prelamin-A/C		sp|P02545-2|LMNA_HUMAN, sp|P02545-3|LMNA_HUMAN, sp|P02545-4|LMNA_HUMAN, sp|P02545-5|LMNA_HUMAN, sp|P02545-6|LMNA_HUMAN	1	1.09705136E8	MS/MS	STY:79.9663@LRLS(0.4899)PS(0.4899)PT(0.4899)S(0.5304)QR;
LRLSPSPTSQR	LRLS[79.9663]PS[79.9663]PTSQR	R	S	387	397	11	2	4S(79.9663),6S(79.9663)	sp|P02545|LMNA_HUMAN	P02545	LMNA_HUMAN	LMNA	Prelamin-A/C		sp|P02545-2|LMNA_HUMAN, sp|P02545-3|LMNA_HUMAN, sp|P02545-4|LMNA_HUMAN, sp|P02545-5|LMNA_HUMAN, sp|P02545-6|LMNA_HUMAN	10	2.92484224E8	MS/MS	STY:79.9663@LRLS(0.9364)PS(0.9364)PT(0.0636)S(0.0636)QR;
LRTGDLGIPPNPEDRSPSPEPIYNSEGK	LRTGDLGIPPNPEDRSPSPEPIY[79.9663]NS[79.9663]EGK	K	R	65	92	28	3	23Y(79.9663),25S(79.9663)	sp|Q15637-2|SF01_HUMAN	Q15637-2	SF01_HUMAN	SF1	Isoform 2 of Splicing factor 1		sp|Q15637-3|SF01_HUMAN, sp|Q15637-4|SF01_HUMAN, sp|Q15637-5|SF01_HUMAN, sp|Q15637-6|SF01_HUMAN, sp|Q15637-7|SF01_HUMAN, sp|Q15637|SF01_HUMAN	2	0	MS/MS	STY:79.9663@LRT(0.3263)GDLGIPPNPEDRS(0.3263)PS(0.3263)PEPIY(0.5105)NS(0.5105)EGK;
LRTGDLGIPPNPEDRSPSPEPIYNSEGK	LRTGDLGIPPNPEDRS[79.9663]PSPEPIY[79.9663]NSEGK	K	R	65	92	28	3	16S(79.9663),23Y(79.9663)	sp|Q15637-2|SF01_HUMAN	Q15637-2	SF01_HUMAN	SF1	Isoform 2 of Splicing factor 1		sp|Q15637-3|SF01_HUMAN, sp|Q15637-4|SF01_HUMAN, sp|Q15637-5|SF01_HUMAN, sp|Q15637-6|SF01_HUMAN, sp|Q15637-7|SF01_HUMAN, sp|Q15637|SF01_HUMAN	1	0	MS/MS	STY:79.9663@LRT(0.1767)GDLGIPPNPEDRS(0.5672)PS(0.5672)PEPIY(0.6352)NS(0.0537)EGK;
LRTGDLGIPPNPEDRSPSPEPIYNSEGK	LRTGDLGIPPNPEDRS[79.9663]PS[79.9663]PEPIYNSEGK	K	R	65	92	28	3,4	16S(79.9663),18S(79.9663)	sp|Q15637-2|SF01_HUMAN	Q15637-2	SF01_HUMAN	SF1	Isoform 2 of Splicing factor 1		sp|Q15637-3|SF01_HUMAN, sp|Q15637-4|SF01_HUMAN, sp|Q15637-5|SF01_HUMAN, sp|Q15637-6|SF01_HUMAN, sp|Q15637-7|SF01_HUMAN, sp|Q15637|SF01_HUMAN	3	4.2189344E7	MS/MS	STY:79.9663@LRT(0.3028)GDLGIPPNPEDRS(0.7901)PS(0.7994)PEPIY(0.0548)NS(0.0529)EGK;
LRTGDLGIPPNPEDRSPSPEPIYNSEGK	LRT[79.9663]GDLGIPPNPEDRSPS[79.9663]PEPIYNSEGK	K	R	65	92	28	3	18S(79.9663),3T(79.9663)	sp|Q15637-2|SF01_HUMAN	Q15637-2	SF01_HUMAN	SF1	Isoform 2 of Splicing factor 1		sp|Q15637-3|SF01_HUMAN, sp|Q15637-4|SF01_HUMAN, sp|Q15637-5|SF01_HUMAN, sp|Q15637-6|SF01_HUMAN, sp|Q15637-7|SF01_HUMAN, sp|Q15637|SF01_HUMAN	3	4.8453228E7	MS/MS	STY:79.9663@LRT(0.5075)GDLGIPPNPEDRS(0.1379)PS(0.4515)PEPIY(0.4515)NS(0.4515)EGK;
LRTGDLGIPPNPEDRSPSPEPIYNSEGK	LRT[79.9663]GDLGIPPNPEDRS[79.9663]PSPEPIYNSEGK	K	R	65	92	28	3,4	16S(79.9663),3T(79.9663)	sp|Q15637-2|SF01_HUMAN	Q15637-2	SF01_HUMAN	SF1	Isoform 2 of Splicing factor 1		sp|Q15637-3|SF01_HUMAN, sp|Q15637-4|SF01_HUMAN, sp|Q15637-5|SF01_HUMAN, sp|Q15637-6|SF01_HUMAN, sp|Q15637-7|SF01_HUMAN, sp|Q15637|SF01_HUMAN	5	2.3427592E7	MS/MS	STY:79.9663@LRT(0.6796)GDLGIPPNPEDRS(0.6098)PS(0.6098)PEPIY(0.0600)NS(0.0409)EGK;
LSPSPTSQR	LSPS[79.9663]PTSQR	R	S	389	397	9	2	4S(79.9663)	sp|P02545|LMNA_HUMAN	P02545	LMNA_HUMAN	LMNA	Prelamin-A/C		sp|P02545-2|LMNA_HUMAN, sp|P02545-3|LMNA_HUMAN, sp|P02545-4|LMNA_HUMAN, sp|P02545-5|LMNA_HUMAN, sp|P02545-6|LMNA_HUMAN	3	3.0571172E7	MS/MS	STY:79.9663@LS(0.0207)PS(0.9385)PT(0.0204)S(0.0204)QR;
LSSQISAGEEK	LSSQIS[79.9663]AGEEK	K	W	293	303	11	2	6S(79.9663)	sp|Q86UE4|LYRIC_HUMAN	Q86UE4	LYRIC_HUMAN	MTDH	Protein LYRIC			1	4484082	MS/MS	STY:79.9663@LS(0.0339)S(0.0366)QIS(0.9294)AGEEK;
LSVPTSDEEDEVPAPKPR	LSVPT[79.9663]SDEEDEVPAPKPR	K	G	104	121	18	3	5T(79.9663)	sp|Q8NE71|ABCF1_HUMAN	Q8NE71	ABCF1_HUMAN	ABCF1	ATP-binding cassette sub-family F member 1		sp|Q8NE71-2|ABCF1_HUMAN	1	1.41381e+06	MS/MS	STY:79.9663@LS(0.0327)VPT(0.4837)S(0.4837)DEEDEVPAPKPR;
LSEGSQPAEEEEDQETPSR	LS[79.9663]EGSQPAEEEEDQETPSR	K	N	239	257	19	2	2S(79.9663)	sp|Q9UKV3-5|ACINU_HUMAN	Q9UKV3-5	ACINU_HUMAN	ACIN1	Isoform 4 of Apoptotic chromatin condensation inducer in the nucleus		sp|Q9UKV3|ACINU_HUMAN	1	1.95011e+06	MS/MS	STY:79.9663@LS(0.2500)EGS(0.2500)QPAEEEEDQET(0.2500)PS(0.2500)R;
LSGGLGAGSCR	LS[79.9663]GGLGAGSC[57.0215]R	R	L	31	41	11	2	10C(57.0215),2S(79.9663)	sp|Q04695|K1C17_HUMAN	Q04695	K1C17_HUMAN	KRT17	Keratin, type I cytoskeletal 17			1	726087	MS/MS	STY:79.9663@LS(0.5000)GGLGAGS(0.5000)CR;
LSPSPSSR	LS[79.9663]PSPSSR	K	V	390	397	8	2	2S(79.9663)	sp|P20700|LMNB1_HUMAN	P20700	LMNB1_HUMAN	LMNB1	Lamin-B1	LMNB2	sp|Q03252|LMNB2_HUMAN	1	5203630	MS/MS	STY:79.9663@LS(0.2500)PS(0.2500)PS(0.2500)S(0.2500)R;
LSSESHHGGSPIHWVLPAGMSAK	LS[79.9663]SESHHGGSPIHWVLPAGMSAK	R	M	397	419	23	4	2S(79.9663)	sp|Q96MU7-2|YTDC1_HUMAN	Q96MU7-2	YTDC1_HUMAN	YTHDC1	Isoform 2 of YTH domain-containing protein 1		sp|Q96MU7|YTDC1_HUMAN	1	3.3117e+06	MS/MS	STY:79.9663@LS(0.2913)S(0.2913)ES(0.2913)HHGGS(0.0929)PIHWVLPAGMS(0.0331)AK;
LSSPVLHR	LS[79.9663]SPVLHR	R	L	142	149	8	2	2S(79.9663)	sp|Q16643-2|DREB_HUMAN	Q16643-2	DREB_HUMAN	DBN1	Isoform 2 of Drebrin		sp|Q16643-3|DREB_HUMAN, sp|Q16643|DREB_HUMAN	2	1.7421806E7	MS/MS	STY:79.9663@LS(0.7250)S(0.2750)PVLHR;
LSSQISAGEEK	LS[79.9663]SQISAGEEK	K	W	293	303	11	2	2S(79.9663)	sp|Q86UE4|LYRIC_HUMAN	Q86UE4	LYRIC_HUMAN	MTDH	Protein LYRIC			1	4484082	MS/MS	STY:79.9663@LS(0.3333)S(0.3333)QIS(0.3333)AGEEK;
LSVPTSDEEDEVPAPK	LS[79.9663]VPTSDEEDEVPAPK	K	P	104	119	16	2	2S(79.9663)	sp|Q8NE71|ABCF1_HUMAN	Q8NE71	ABCF1_HUMAN	ABCF1	ATP-binding cassette sub-family F member 1		sp|Q8NE71-2|ABCF1_HUMAN	4	9508798	MS/MS	STY:79.9663@LS(0.5721)VPT(0.0227)S(0.4052)DEEDEVPAPK;
LSVPTSDEEDEVPAPK	LS[79.9663]VPT[79.9663]SDEEDEVPAPK	K	P	104	119	16	2	2S(79.9663),5T(79.9663)	sp|Q8NE71|ABCF1_HUMAN	Q8NE71	ABCF1_HUMAN	ABCF1	ATP-binding cassette sub-family F member 1		sp|Q8NE71-2|ABCF1_HUMAN	1	0	MS/MS	STY:79.9663@LS(0.6667)VPT(0.6667)S(0.6667)DEEDEVPAPK;
LTPVSPESSSTEEK	LTPVS[79.9663]PESSSTEEK	R	S	268	281	14	2	5S(79.9663)	sp|Q13501|SQSTM_HUMAN	Q13501	SQSTM_HUMAN	SQSTM1	Sequestosome-1		sp|Q13501-2|SQSTM_HUMAN	1	5.8964e+06	MS/MS	STY:79.9663@LT(0.0044)PVS(0.1991)PES(0.1991)S(0.1991)S(0.1991)T(0.1991)EEK;
LTQAEISEQPTMATVVPQVPTSPK	LTQAEISEQPTMATVVPQVPT[79.9663]SPK	R	S	1133	1156	24	3	21T(79.9663)	sp|Q70E73|RAPH1_HUMAN	Q70E73	RAPH1_HUMAN	RAPH1	Ras-associated and pleckstrin homology domains-containing protein 1			1	0	MS/MS	STY:79.9663@LT(0.0368)QAEIS(0.0302)EQPT(0.0109)MAT(0.0109)VVPQVPT(0.4556)S(0.4556)PK;
LTPLPEDNSMNVDQDGDPSDR	LT[79.9663]PLPEDNSMNVDQDGDPSDR	K	M	3197	3217	21	3	2T(79.9663)	sp|P78527-2|PRKDC_HUMAN	P78527-2	PRKDC_HUMAN	PRKDC	Isoform 2 of DNA-dependent protein kinase catalytic subunit		sp|P78527|PRKDC_HUMAN	1	0	MS/MS	STY:79.9663@LT(0.4343)PLPEDNS(0.4343)MNVDQDGDPS(0.1314)DR;
LTPVSPESSSTEEK	LT[79.9663]PVSPESSSTEEK	R	S	268	281	14	2	2T(79.9663)	sp|Q13501|SQSTM_HUMAN	Q13501	SQSTM_HUMAN	SQSTM1	Sequestosome-1		sp|Q13501-2|SQSTM_HUMAN	1	5.8964e+06	MS/MS	STY:79.9663@LT(0.4811)PVS(0.4811)PES(0.0095)S(0.0095)S(0.0095)T(0.0094)EEK;
LTRYSQGDDDGSSSSGGSSVAGSQSTLFK	LT[79.9663]RYSQGDDDGSSSSGGSSVAGSQSTLFK	R	D	8	36	29	3	2T(79.9663)	sp|Q9UH99-2|SUN2_HUMAN	Q9UH99-2	SUN2_HUMAN	SUN2	Isoform 2 of SUN domain-containing protein 2		sp|Q9UH99-3|SUN2_HUMAN, sp|Q9UH99|SUN2_HUMAN	1	0	MS/MS	STY:79.9663@LT(0.0993)RY(0.0993)S(0.0993)QGDDDGS(0.0993)S(0.0993)S(0.0993)S(0.0993)GGS(0.0993)S(0.0993)VAGS(0.0993)QS(0.0037)T(0.0037)LFK;
LTVENSPKQEAGISEGQGTAGEEEEK	LT[79.9663]VENSPKQEAGISEGQGTAGEEEEK	K	K	68	93	26	3	2T(79.9663)	sp|O43583|DENR_HUMAN	O43583	DENR_HUMAN	DENR	Density-regulated protein			3	6.55238e+06	MS/MS	STY:79.9663@LT(0.4863)VENS(0.4863)PKQEAGIS(0.0137)EGQGT(0.0137)AGEEEEK;
LTWHSCPEDEAQ	LT[79.9663]WHSC[57.0215]PEDEAQ	R	-	172	183	12	2	2T(79.9663),6C(57.0215)	sp|Q13185|CBX3_HUMAN	Q13185	CBX3_HUMAN	CBX3	Chromobox protein homolog 3			1	0	MS/MS	STY:79.9663@LT(0.5000)WHS(0.5000)CPEDEAQ;
LVPYSCRENYSDSEEEDDDDVASSR	LVPY[79.9663]S[79.9663]C[57.0215]RENYSDSEEEDDDDVASSR	R	Q	249	273	25	3	4Y(79.9663),5S(79.9663),6C(57.0215)	sp|Q9Y2U8|MAN1_HUMAN	Q9Y2U8	MAN1_HUMAN	LEMD3	Inner nuclear membrane protein Man1			1	0	MS/MS	STY:79.9663@LVPY(0.3861)S(0.3861)CRENY(0.3861)S(0.3861)DS(0.3861)EEEDDDDVAS(0.0347)S(0.0347)R;
LVREDENDASDDEDDDEK	LVREDENDAS[79.9663]DDEDDDEK	R	R	253	270	18	3	10S(79.9663)	sp|Q9Y5B6-2|PAXB1_HUMAN	Q9Y5B6-2	PAXB1_HUMAN	PAXBP1	Isoform 2 of PAX3- and PAX7-binding protein 1		sp|Q9Y5B6-3|PAXB1_HUMAN, sp|Q9Y5B6-4|PAXB1_HUMAN, sp|Q9Y5B6|PAXB1_HUMAN	1	0	MS/MS	STY:79.9663@LVREDENDAS(1.0000)DDEDDDEK;
LVSFHDDSDEDLLHI	LVSFHDDS[79.9663]DEDLLHI	K	-	2477	2491	15	2	8S(79.9663)	sp|P11717|MPRI_HUMAN	P11717	MPRI_HUMAN	IGF2R	Cation-independent mannose-6-phosphate receptor			2	0	MS/MS	STY:79.9663@LVS(0.0599)FHDDS(0.9401)DEDLLHI;
LVSNHSLHETSSVFVDSLTK	LVSNHSLHETS[79.9663]SVFVDSLTK	R	A	2513	2532	20	3	11S(79.9663)	sp|P21333-2|FLNA_HUMAN	P21333-2	FLNA_HUMAN	FLNA	Isoform 2 of Filamin-A		sp|P21333|FLNA_HUMAN	1	680410	MS/MS	STY:79.9663@LVS(0.0266)NHS(0.0266)LHET(0.0266)S(0.2300)S(0.2300)VFVDS(0.2300)LT(0.2300)K;
MAESPCSPSGQQPPSPPSPDELPANVK	MAES[79.9663]PC[57.0215]S[79.9663]PSGQQPPSPPSPDELPANVK	K	Q	1211	1237	27	3	4S(79.9663),6C(57.0215),7S(79.9663)	sp|Q14160-2|SCRIB_HUMAN	Q14160-2	SCRIB_HUMAN	SCRIB	Isoform 2 of Protein scribble homolog		sp|Q14160-3|SCRIB_HUMAN, sp|Q14160|SCRIB_HUMAN	1	3.78402e+06	MS/MS	STY:79.9663@MAES(0.4053)PCS(0.4053)PS(0.4053)GQQPPS(0.3920)PPS(0.3920)PDELPANVK;
MAGQEIPEEGREVEEFSEDDDEDDSDDSEAEK	MAGQEIPEEGREVEEFS[79.9663]EDDDEDDS[79.9663]DDSEAEK	R	Q	337	368	32	3	17S(79.9663),25S(79.9663)	sp|Q9Y2W2|WBP11_HUMAN	Q9Y2W2	WBP11_HUMAN	WBP11	WW domain-binding protein 11			1	0	MS/MS	STY:79.9663@MAGQEIPEEGREVEEFS(0.6826)EDDDEDDS(0.6587)DDS(0.6587)EAEK;
MAGQEIPEEGREVEEFSEDDDEDDSDDSEAEK	MAGQEIPEEGREVEEFS[79.9663]EDDDEDDS[79.9663]DDS[79.9663]EAEK	R	Q	337	368	32	3	17S(79.9663),25S(79.9663),28S(79.9663)	sp|Q9Y2W2|WBP11_HUMAN	Q9Y2W2	WBP11_HUMAN	WBP11	WW domain-binding protein 11			3	1.1377233E7	MS/MS	STY:79.9663@MAGQEIPEEGREVEEFS(1.0000)EDDDEDDS(1.0000)DDS(1.0000)EAEK;
MALPPQEDATASPPRQK	MALPPQEDAT[79.9663]ASPPRQK	K	D	1168	1184	17	3	10T(79.9663)	sp|Q9UQ35|SRRM2_HUMAN	Q9UQ35	SRRM2_HUMAN	SRRM2	Serine/arginine repetitive matrix protein 2		sp|Q9UQ35-2|SRRM2_HUMAN	1	0	MS/MS	STY:79.9663@MALPPQEDAT(0.5000)AS(0.5000)PPRQK;
MAPTPIPTRSPSDSSTASTPVAEQIER	MAPTPIPT[79.9663]RSPSDSSTASTPVAEQIER	R	A	330	356	27	3	8T(79.9663)	sp|Q16643-2|DREB_HUMAN	Q16643-2	DREB_HUMAN	DBN1	Isoform 2 of Drebrin		sp|Q16643-3|DREB_HUMAN, sp|Q16643|DREB_HUMAN	1	5.07911e+06	MS/MS	STY:79.9663@MAPT(0.0210)PIPT(0.1620)RS(0.1620)PS(0.1620)DS(0.1620)S(0.1620)T(0.1620)AS(0.0034)T(0.0034)PVAEQIER;
MDSDEDEKEGEEEK	MDS[79.9663]DEDEKEGEEEK	K	V	168	181	14	2	3S(79.9663)	sp|Q96ST2-3|IWS1_HUMAN	Q96ST2-3	IWS1_HUMAN	IWS1	Isoform 3 of Protein IWS1 homolog		sp|Q96ST2-2|IWS1_HUMAN, sp|Q96ST2|IWS1_HUMAN	1	0	MS/MS	STY:79.9663@MDS(1.0000)DEDEKEGEEEK;
MEREDSSEEEEEEIDDEEIER	MEREDS[79.9663]S[79.9663]EEEEEEIDDEEIER	R	R	127	147	21	3	6S(79.9663),7S(79.9663)	sp|P55081|MFAP1_HUMAN	P55081	MFAP1_HUMAN	MFAP1	Microfibrillar-associated protein 1			6	1.0399669E7	MS/MS	STY:79.9663@MEREDS(1.0000)S(1.0000)EEEEEEIDDEEIER;
MESEGGADDSAEEGDLLDDDDNEDRGDDQLELIK	MESEGGADDS[79.9663]AEEGDLLDDDDNEDRGDDQLELIK	K	D	238	271	34	3	10S(79.9663)	sp|P07910-2|HNRPC_HUMAN	P07910-2	HNRPC_HUMAN	HNRNPC	Isoform C1 of Heterogeneous nuclear ribonucleoproteins C1/C2		sp|P07910-3|HNRPC_HUMAN, sp|P07910-4|HNRPC_HUMAN, sp|P07910|HNRPC_HUMAN	6	6.0211533E8	MS/MS	STY:79.9663@MES(0.0977)EGGADDS(0.9023)AEEGDLLDDDDNEDRGDDQLELIK;
MESEGGADDSAEEGDLLDDDDNEDRGDDQLELIKDDEK	MESEGGADDS[79.9663]AEEGDLLDDDDNEDRGDDQLELIKDDEK	K	E	238	275	38	3,4	10S(79.9663)	sp|P07910-2|HNRPC_HUMAN	P07910-2	HNRPC_HUMAN	HNRNPC	Isoform C1 of Heterogeneous nuclear ribonucleoproteins C1/C2		sp|P07910-3|HNRPC_HUMAN, sp|P07910-4|HNRPC_HUMAN, sp|P07910|HNRPC_HUMAN	8	5.735616E8	MS/MS	STY:79.9663@MES(0.0649)EGGADDS(0.9351)AEEGDLLDDDDNEDRGDDQLELIKDDEK;
MESEGGADDSAEEGDLLDDDDNEDRGDDQLELIK	MES[79.9663]EGGADDSAEEGDLLDDDDNEDRGDDQLELIK	K	D	238	271	34	3	3S(79.9663)	sp|P07910-2|HNRPC_HUMAN	P07910-2	HNRPC_HUMAN	HNRNPC	Isoform C1 of Heterogeneous nuclear ribonucleoproteins C1/C2		sp|P07910-3|HNRPC_HUMAN, sp|P07910-4|HNRPC_HUMAN, sp|P07910|HNRPC_HUMAN	5	6.0211533E8	MS/MS	STY:79.9663@MES(0.8373)EGGADDS(0.1627)AEEGDLLDDDDNEDRGDDQLELIK;
MESEGGADDSAEEGDLLDDDDNEDRGDDQLELIKDDEK	MES[79.9663]EGGADDSAEEGDLLDDDDNEDRGDDQLELIKDDEK	K	E	238	275	38	3,4	3S(79.9663)	sp|P07910-2|HNRPC_HUMAN	P07910-2	HNRPC_HUMAN	HNRNPC	Isoform C1 of Heterogeneous nuclear ribonucleoproteins C1/C2		sp|P07910-3|HNRPC_HUMAN, sp|P07910-4|HNRPC_HUMAN, sp|P07910|HNRPC_HUMAN	11	5.7935373E8	MS/MS	STY:79.9663@MES(0.8881)EGGADDS(0.1119)AEEGDLLDDDDNEDRGDDQLELIKDDEK;
MESEGGADDSAEEGDLLDDDDNEDRGDDQLELIK	MES[79.9663]EGGADDS[79.9663]AEEGDLLDDDDNEDRGDDQLELIK	K	D	238	271	34	3	10S(79.9663),3S(79.9663)	sp|P07910-2|HNRPC_HUMAN	P07910-2	HNRPC_HUMAN	HNRNPC	Isoform C1 of Heterogeneous nuclear ribonucleoproteins C1/C2		sp|P07910-3|HNRPC_HUMAN, sp|P07910-4|HNRPC_HUMAN, sp|P07910|HNRPC_HUMAN	2	3.2802274E7	MS/MS	STY:79.9663@MES(1.0000)EGGADDS(1.0000)AEEGDLLDDDDNEDRGDDQLELIK;
MESEGGADDSAEEGDLLDDDDNEDRGDDQLELIKDDEK	MES[79.9663]EGGADDS[79.9663]AEEGDLLDDDDNEDRGDDQLELIKDDEK	K	E	238	275	38	3,4	10S(79.9663),3S(79.9663)	sp|P07910-2|HNRPC_HUMAN	P07910-2	HNRPC_HUMAN	HNRNPC	Isoform C1 of Heterogeneous nuclear ribonucleoproteins C1/C2		sp|P07910-3|HNRPC_HUMAN, sp|P07910-4|HNRPC_HUMAN, sp|P07910|HNRPC_HUMAN	3	9.673124E7	MS/MS	STY:79.9663@MES(1.0000)EGGADDS(1.0000)AEEGDLLDDDDNEDRGDDQLELIKDDEK;
MESLSSHRIDEDGENTQIEDTEPMSPVLNSK	MES[79.9663]LSSHRIDEDGENTQIEDTEPMSPVLNSK	K	F	533	563	31	3	3S(79.9663)	sp|Q12888-2|TP53B_HUMAN	Q12888-2	TP53B_HUMAN	TP53BP1	Isoform 2 of TP53-binding protein 1		sp|Q12888-3|TP53B_HUMAN, sp|Q12888|TP53B_HUMAN	1	2651606	MS/MS	STY:79.9663@MES(0.2386)LS(0.2386)S(0.2386)HRIDEDGENT(0.0096)QIEDT(0.1188)EPMS(0.0966)PVLNS(0.0592)K;
METVSNASSSSNPSSPGR	METVSNAS[79.9663]SSSNPSSPGR	R	I	1152	1169	18	2	8S(79.9663)	sp|Q9NTI5|PDS5B_HUMAN	Q9NTI5	PDS5B_HUMAN	PDS5B	Sister chromatid cohesion protein PDS5 homolog B		sp|Q9NTI5-2|PDS5B_HUMAN	1	2.83093e+06	MS/MS	STY:79.9663@MET(0.0043)VS(0.0043)NAS(0.2403)S(0.2403)S(0.2403)S(0.2403)NPS(0.0150)S(0.0150)PGR;
METVSNASSSSNPSSPGR	MET[79.9663]VSNASSSSNPSSPGR	R	I	1152	1169	18	2	3T(79.9663)	sp|Q9NTI5|PDS5B_HUMAN	Q9NTI5	PDS5B_HUMAN	PDS5B	Sister chromatid cohesion protein PDS5 homolog B		sp|Q9NTI5-2|PDS5B_HUMAN	1	2.83093e+06	MS/MS	STY:79.9663@MET(0.1250)VS(0.1250)NAS(0.1250)S(0.1250)S(0.1250)S(0.1250)NPS(0.1250)S(0.1250)PGR;
MGQAPSQSLLPPAQDQPRSPVPSAFSDQSR	MGQAPSQSLLPPAQDQPRS[79.9663]PVPSAFSDQSR	R	C	2431	2460	30	3	19S(79.9663)	sp|Q9UQ35|SRRM2_HUMAN	Q9UQ35	SRRM2_HUMAN	SRRM2	Serine/arginine repetitive matrix protein 2			1	0	MS/MS	STY:79.9663@MGQAPS(0.0165)QS(0.0165)LLPPAQDQPRS(0.9029)PVPS(0.0214)AFS(0.0214)DQS(0.0214)R;
MGQAPSQSLLPPAQDQPRSPVPSAFSDQSR	MGQAPSQS[79.9663]LLPPAQDQPRSPVPSAFSDQSR	R	C	2431	2460	30	3	8S(79.9663)	sp|Q9UQ35|SRRM2_HUMAN	Q9UQ35	SRRM2_HUMAN	SRRM2	Serine/arginine repetitive matrix protein 2			1	1.75769E7	MS/MS	STY:79.9663@MGQAPS(0.0600)QS(0.7560)LLPPAQDQPRS(0.1064)PVPS(0.0266)AFS(0.0266)DQS(0.0244)R;
MGQAPSQSLLPPAQDQPRSPVPSAFSDQSR	MGQAPS[79.9663]QSLLPPAQDQPRSPVPSAFSDQSR	R	C	2431	2460	30	3	6S(79.9663)	sp|Q9UQ35|SRRM2_HUMAN	Q9UQ35	SRRM2_HUMAN	SRRM2	Serine/arginine repetitive matrix protein 2			1	9602505	MS/MS	STY:79.9663@MGQAPS(0.3198)QS(0.3198)LLPPAQDQPRS(0.2992)PVPS(0.0204)AFS(0.0204)DQS(0.0204)R;
MHDGELEEQEEDDEKSDSEGGDLDK	MHDGELEEQEEDDEKS[79.9663]DS[79.9663]EGGDLDK	K	H	4737	4761	25	3	16S(79.9663),18S(79.9663)	sp|Q9NU22|MDN1_HUMAN	Q9NU22	MDN1_HUMAN	MDN1	Midasin			2	2406261	MS/MS	STY:79.9663@MHDGELEEQEEDDEKS(1.0000)DS(1.0000)EGGDLDK;
MLAESDESGDEESVSQTDK	MLAESDESGDEES[79.9663]VS[79.9663]QTDK	K	T	186	204	19	2	13S(79.9663),15S(79.9663)	sp|P22059|OSBP1_HUMAN	P22059	OSBP1_HUMAN	OSBP	Oxysterol-binding protein 1			1	9986343	MS/MS	STY:79.9663@MLAES(0.1921)DES(0.1921)GDEES(0.5386)VS(0.5386)QT(0.5386)DK;
MLAESDESGDEESVSQTDK	MLAES[79.9663]DES[79.9663]GDEESVSQTDK	K	T	186	204	19	2	5S(79.9663),8S(79.9663)	sp|P22059|OSBP1_HUMAN	P22059	OSBP1_HUMAN	OSBP	Oxysterol-binding protein 1			2	1.0058877E7	MS/MS	STY:79.9663@MLAES(0.9014)DES(0.9014)GDEES(0.0657)VS(0.0657)QT(0.0657)DK;
MLPHAPGVQMQAIPEDAIPEESGDEDEDDPDK	MLPHAPGVQMQAIPEDAIPEES[79.9663]GDEDEDDPDK	R	R	372	403	32	3	22S(79.9663)	sp|Q13547|HDAC1_HUMAN	Q13547	HDAC1_HUMAN	HDAC1	Histone deacetylase 1			2	1.509037E7	MS/MS	STY:79.9663@MLPHAPGVQMQAIPEDAIPEES(1.0000)GDEDEDDPDK;
MLPHAPGVQMQAIPEDAIPEESGDEDEDDPDKR	MLPHAPGVQMQAIPEDAIPEES[79.9663]GDEDEDDPDKR	R	I	372	404	33	3,4	22S(79.9663)	sp|Q13547|HDAC1_HUMAN	Q13547	HDAC1_HUMAN	HDAC1	Histone deacetylase 1			7	3.0739992E7	MS/MS	STY:79.9663@MLPHAPGVQMQAIPEDAIPEES(1.0000)GDEDEDDPDKR;
MLPHAPGVQMQAIPEDAVHEDSGDEDGEDPDK	MLPHAPGVQMQAIPEDAVHEDS[79.9663]GDEDGEDPDK	R	R	343	374	32	3,4	22S(79.9663)	sp|Q92769-3|HDAC2_HUMAN	Q92769-3	HDAC2_HUMAN	HDAC2	Isoform 2 of Histone deacetylase 2		sp|Q92769|HDAC2_HUMAN	2	1.0375276E7	MS/MS	STY:79.9663@MLPHAPGVQMQAIPEDAVHEDS(1.0000)GDEDGEDPDK;
MLPHAPGVQMQAIPEDAVHEDSGDEDGEDPDKR	MLPHAPGVQMQAIPEDAVHEDS[79.9663]GDEDGEDPDKR	R	I	343	375	33	3,4	22S(79.9663)	sp|Q92769-3|HDAC2_HUMAN	Q92769-3	HDAC2_HUMAN	HDAC2	Isoform 2 of Histone deacetylase 2		sp|Q92769|HDAC2_HUMAN	7	4.0366984E7	MS/MS	STY:79.9663@MLPHAPGVQMQAIPEDAVHEDS(1.0000)GDEDGEDPDKR;
MLPHAPGVQMQAIPEDAIPEESGDEDEDDPDKR	MLPHAPGVQM[15.9949]QAIPEDAIPEES[79.9663]GDEDEDDPDKR	R	I	372	404	33	3	10M(15.9949),22S(79.9663)	sp|Q13547|HDAC1_HUMAN	Q13547	HDAC1_HUMAN	HDAC1	Histone deacetylase 1			1	2.67315e+06	MS/MS	STY:79.9663@MLPHAPGVQMQAIPEDAIPEES(1.0000)GDEDEDDPDKR;M:15.9949@M(0.3920)LPHAPGVQM(0.6080)QAIPEDAIPEESGDEDEDDPDKR;
MLPHAPGVQMQAIPEDAVHEDSGDEDGEDPDKR	MLPHAPGVQM[15.9949]QAIPEDAVHEDS[79.9663]GDEDGEDPDKR	R	I	343	375	33	4	10M(15.9949),22S(79.9663)	sp|Q92769-3|HDAC2_HUMAN	Q92769-3	HDAC2_HUMAN	HDAC2	Isoform 2 of Histone deacetylase 2		sp|Q92769|HDAC2_HUMAN	1	4.87192e+06	MS/MS	STY:79.9663@MLPHAPGVQMQAIPEDAVHEDS(1.0000)GDEDGEDPDKR;M:15.9949@M(0.4628)LPHAPGVQM(0.5372)QAIPEDAVHEDSGDEDGEDPDKR;
MNEEISSDSESESLAPR	MNEEISS[79.9663]DS[79.9663]ES[79.9663]ESLAPR	K	K	45	61	17	2	11S(79.9663),7S(79.9663),9S(79.9663)	sp|O43818|U3IP2_HUMAN	O43818	U3IP2_HUMAN	RRP9	U3 small nucleolar RNA-interacting protein 2			1	0	MS/MS	STY:79.9663@MNEEIS(0.3939)S(0.7534)DS(0.7534)ES(0.7534)ES(0.3459)LAPR;
MPAPEPGAAPSNEEDDSDDDDVLAPSGATAAGAGDEGDGQTTGST	MPAPEPGAAPSNEEDDS[79.9663]DDDDVLAPSGATAAGAGDEGDGQTTGST	K	-	518	562	45	3	17S(79.9663)	sp|Q9H6Z4-2|RANB3_HUMAN	Q9H6Z4-2	RANB3_HUMAN	RANBP3	Isoform 2 of Ran-binding protein 3		sp|Q9H6Z4-3|RANB3_HUMAN, sp|Q9H6Z4|RANB3_HUMAN	1	9026734	MS/MS	STY:79.9663@MPAPEPGAAPS(0.0301)NEEDDS(0.2975)DDDDVLAPS(0.2975)GAT(0.2975)AAGAGDEGDGQT(0.0193)T(0.0193)GS(0.0193)T(0.0193);
MPAPEPGAAPSNEEDDSDDDDVLAPSGATAAGAGDEGDGQTTGST	MPAPEPGAAPS[79.9663]NEEDDSDDDDVLAPSGATAAGAGDEGDGQTTGST	K	-	518	562	45	3	11S(79.9663)	sp|Q9H6Z4-2|RANB3_HUMAN	Q9H6Z4-2	RANB3_HUMAN	RANBP3	Isoform 2 of Ran-binding protein 3		sp|Q9H6Z4-3|RANB3_HUMAN, sp|Q9H6Z4|RANB3_HUMAN	2	9026734	MS/MS	STY:79.9663@MPAPEPGAAPS(0.7971)NEEDDS(0.0290)DDDDVLAPS(0.0290)GAT(0.0290)AAGAGDEGDGQT(0.0290)T(0.0290)GS(0.0290)T(0.0290);
MPFLSISSPK	MPFLS[79.9663]ISSPK	K	V	3405	3414	10	2	5S(79.9663)	sp|Q09666|AHNK_HUMAN	Q09666	AHNK_HUMAN	AHNAK	Neuroblast differentiation-associated protein AHNAK			2	2.01372e+06	MS/MS	STY:79.9663@MPFLS(0.3333)IS(0.3333)S(0.3333)PK;
MPIDLVIDDREGGSKSDSEDITR	MPIDLVIDDREGGSKS[79.9663]DSEDITR	K	S	179	201	23	3	16S(79.9663)	sp|O00470-2|MEIS1_HUMAN	O00470-2	MEIS1_HUMAN	MEIS1	Isoform 2 of Homeobox protein Meis1		sp|O00470|MEIS1_HUMAN	1	2.83517e+06	MS/MS	STY:79.9663@MPIDLVIDDREGGS(0.0693)KS(0.3102)DS(0.3102)EDIT(0.3102)R;
MPQDGSDDEDEEWPTLEK	MPQDGSDDEDEEWPT[79.9663]LEK	R	A	93	110	18	2	15T(79.9663)	sp|Q13895|BYST_HUMAN	Q13895	BYST_HUMAN	BYSL	Bystin			2	1.0274031E7	MS/MS	STY:79.9663@MPQDGS(0.1997)DDEDEEWPT(0.8003)LEK;
MPQDGSDDEDEEWPTLEK	MPQDGS[79.9663]DDEDEEWPTLEK	R	A	93	110	18	2	6S(79.9663)	sp|Q13895|BYST_HUMAN	Q13895	BYST_HUMAN	BYSL	Bystin			2	1.0274031E7	MS/MS	STY:79.9663@MPQDGS(0.8795)DDEDEEWPT(0.1205)LEK;
MQNNSSPSISPNTSFTSDGSPSPLGGIK	MQNNS[79.9663]S[79.9663]PSISPNTSFTSDGSPSPLGGIK	R	R	390	417	28	3	5S(79.9663),6S(79.9663)	sp|Q9H0D6-2|XRN2_HUMAN	Q9H0D6-2	XRN2_HUMAN	XRN2	Isoform 2 of 5'-3' exoribonuclease 2		sp|Q9H0D6|XRN2_HUMAN	1	0	MS/MS	STY:79.9663@MQNNS(0.3217)S(0.2453)PS(0.2453)IS(0.2453)PNT(0.0156)S(0.0156)FT(0.2278)S(0.2278)DGS(0.2278)PS(0.2278)PLGGIK;
MSGFIYQGK	MSGFIY[79.9663]QGK	R	L	339	347	9	2	6Y(79.9663)	sp|Q14155-1|ARHG7_HUMAN	Q14155-1	ARHG7_HUMAN	ARHGEF7	Isoform 1 of Rho guanine nucleotide exchange factor 7	ARHGEF6	sp|Q14155-2|ARHG7_HUMAN, sp|Q14155-3|ARHG7_HUMAN, sp|Q14155-5|ARHG7_HUMAN, sp|Q14155-6|ARHG7_HUMAN, sp|Q14155|ARHG7_HUMAN, sp|Q15052-2|ARHG6_HUMAN, sp|Q15052|ARHG6_HUMAN	1	3192430	MS/MS	STY:79.9663@MS(0.1057)GFIY(0.8943)QGK;
MSGFIYQGK	MS[79.9663]GFIYQGK	R	L	339	347	9	2	2S(79.9663)	sp|Q14155-1|ARHG7_HUMAN	Q14155-1	ARHG7_HUMAN	ARHGEF7	Isoform 1 of Rho guanine nucleotide exchange factor 7	ARHGEF6	sp|Q14155-2|ARHG7_HUMAN, sp|Q14155-3|ARHG7_HUMAN, sp|Q14155-5|ARHG7_HUMAN, sp|Q14155-6|ARHG7_HUMAN, sp|Q14155|ARHG7_HUMAN, sp|Q15052-2|ARHG6_HUMAN, sp|Q15052|ARHG6_HUMAN	1	3192430	MS/MS	STY:79.9663@MS(0.5000)GFIY(0.5000)QGK;
MSQPGSPSPK	MS[79.9663]QPGSPSPK	K	T	1558	1567	10	2	2S(79.9663)	sp|Q14839-2|CHD4_HUMAN	Q14839-2	CHD4_HUMAN	CHD4	Isoform 2 of Chromodomain-helicase-DNA-binding protein 4		sp|Q14839|CHD4_HUMAN	1	0	MS/MS	STY:79.9663@MS(0.4892)QPGS(0.4892)PS(0.0215)PK;
MYPPRSPK	MYPPRS[79.9663]PK	R	S	444	451	8	2	6S(79.9663)	sp|Q8WWM7-2|ATX2L_HUMAN	Q8WWM7-2	ATX2L_HUMAN	ATXN2L	Isoform 2 of Ataxin-2-like protein		sp|Q8WWM7-3|ATX2L_HUMAN, sp|Q8WWM7-4|ATX2L_HUMAN, sp|Q8WWM7-5|ATX2L_HUMAN, sp|Q8WWM7-6|ATX2L_HUMAN, sp|Q8WWM7-8|ATX2L_HUMAN, sp|Q8WWM7-9|ATX2L_HUMAN, sp|Q8WWM7|ATX2L_HUMAN	1	1.02872e+06	MS/MS	STY:79.9663@MY(0.2890)PPRS(0.7110)PK;
MAPTPIPTRSPSDSSTASTPVAEQIER	M[15.9949]APT[79.9663]PIPTRSPSDSSTASTPVAEQIER	R	A	330	356	27	3	1M(15.9949),4T(79.9663)	sp|Q16643-2|DREB_HUMAN	Q16643-2	DREB_HUMAN	DBN1	Isoform 2 of Drebrin		sp|Q16643-3|DREB_HUMAN, sp|Q16643|DREB_HUMAN	1	2.98505e+06	MS/MS	STY:79.9663@MAPT(0.5781)PIPT(0.0527)RS(0.0527)PS(0.0527)DS(0.0527)S(0.0527)T(0.0527)AS(0.0527)T(0.0527)PVAEQIER;M:15.9949@M(1.0000)APTPIPTRSPSDSSTASTPVAEQIER;
MEREDSSEEEEEEIDDEEIER	M[15.9949]EREDS[79.9663]S[79.9663]EEEEEEIDDEEIER	R	R	127	147	21	3	1M(15.9949),6S(79.9663),7S(79.9663)	sp|P55081|MFAP1_HUMAN	P55081	MFAP1_HUMAN	MFAP1	Microfibrillar-associated protein 1			1	0	MS/MS	STY:79.9663@MEREDS(1.0000)S(1.0000)EEEEEEIDDEEIER;M:15.9949@M(1.0000)EREDSSEEEEEEIDDEEIER;
MESEGGADDSAEEGDLLDDDDNEDRGDDQLELIK	M[15.9949]ESEGGADDS[79.9663]AEEGDLLDDDDNEDRGDDQLELIK	K	D	238	271	34	3	10S(79.9663),1M(15.9949)	sp|P07910-2|HNRPC_HUMAN	P07910-2	HNRPC_HUMAN	HNRNPC	Isoform C1 of Heterogeneous nuclear ribonucleoproteins C1/C2		sp|P07910-3|HNRPC_HUMAN, sp|P07910-4|HNRPC_HUMAN, sp|P07910|HNRPC_HUMAN	3	1.47193776E8	MS/MS	STY:79.9663@MES(0.0637)EGGADDS(0.9363)AEEGDLLDDDDNEDRGDDQLELIK;M:15.9949@M(1.0000)ESEGGADDSAEEGDLLDDDDNEDRGDDQLELIK;
MESEGGADDSAEEGDLLDDDDNEDRGDDQLELIKDDEK	M[15.9949]ESEGGADDS[79.9663]AEEGDLLDDDDNEDRGDDQLELIKDDEK	K	E	238	275	38	3,4	10S(79.9663),1M(15.9949)	sp|P07910-2|HNRPC_HUMAN	P07910-2	HNRPC_HUMAN	HNRNPC	Isoform C1 of Heterogeneous nuclear ribonucleoproteins C1/C2		sp|P07910-3|HNRPC_HUMAN, sp|P07910-4|HNRPC_HUMAN, sp|P07910|HNRPC_HUMAN	4	1.84571424E8	MS/MS	STY:79.9663@MES(0.0668)EGGADDS(0.9332)AEEGDLLDDDDNEDRGDDQLELIKDDEK;M:15.9949@M(1.0000)ESEGGADDSAEEGDLLDDDDNEDRGDDQLELIKDDEK;
MESEGGADDSAEEGDLLDDDDNEDRGDDQLELIK	M[15.9949]ES[79.9663]EGGADDSAEEGDLLDDDDNEDRGDDQLELIK	K	D	238	271	34	3	1M(15.9949),3S(79.9663)	sp|P07910-2|HNRPC_HUMAN	P07910-2	HNRPC_HUMAN	HNRNPC	Isoform C1 of Heterogeneous nuclear ribonucleoproteins C1/C2		sp|P07910-3|HNRPC_HUMAN, sp|P07910-4|HNRPC_HUMAN, sp|P07910|HNRPC_HUMAN	4	1.51222464E8	MS/MS	STY:79.9663@MES(0.7856)EGGADDS(0.2144)AEEGDLLDDDDNEDRGDDQLELIK;M:15.9949@M(1.0000)ESEGGADDSAEEGDLLDDDDNEDRGDDQLELIK;
MESEGGADDSAEEGDLLDDDDNEDRGDDQLELIKDDEK	M[15.9949]ES[79.9663]EGGADDSAEEGDLLDDDDNEDRGDDQLELIKDDEK	K	E	238	275	38	3,4	1M(15.9949),3S(79.9663)	sp|P07910-2|HNRPC_HUMAN	P07910-2	HNRPC_HUMAN	HNRNPC	Isoform C1 of Heterogeneous nuclear ribonucleoproteins C1/C2		sp|P07910-3|HNRPC_HUMAN, sp|P07910-4|HNRPC_HUMAN, sp|P07910|HNRPC_HUMAN	10	1.8902344E8	MS/MS	STY:79.9663@MES(0.9330)EGGADDS(0.0670)AEEGDLLDDDDNEDRGDDQLELIKDDEK;M:15.9949@M(1.0000)ESEGGADDSAEEGDLLDDDDNEDRGDDQLELIKDDEK;
MESEGGADDSAEEGDLLDDDDNEDRGDDQLELIKDDEK	M[15.9949]ES[79.9663]EGGADDS[79.9663]AEEGDLLDDDDNEDRGDDQLELIKDDEK	K	E	238	275	38	3	10S(79.9663),1M(15.9949),3S(79.9663)	sp|P07910-2|HNRPC_HUMAN	P07910-2	HNRPC_HUMAN	HNRNPC	Isoform C1 of Heterogeneous nuclear ribonucleoproteins C1/C2		sp|P07910-3|HNRPC_HUMAN, sp|P07910-4|HNRPC_HUMAN, sp|P07910|HNRPC_HUMAN	1	1.6874044E7	MS/MS	STY:79.9663@MES(1.0000)EGGADDS(1.0000)AEEGDLLDDDDNEDRGDDQLELIKDDEK;M:15.9949@M(1.0000)ESEGGADDSAEEGDLLDDDDNEDRGDDQLELIKDDEK;
MLAESDESGDEESVSQTDK	M[15.9949]LAES[79.9663]DES[79.9663]GDEESVSQTDK	K	T	186	204	19	2	1M(15.9949),5S(79.9663),8S(79.9663)	sp|P22059|OSBP1_HUMAN	P22059	OSBP1_HUMAN	OSBP	Oxysterol-binding protein 1			1	0	MS/MS	STY:79.9663@MLAES(0.8070)DES(0.8070)GDEES(0.1286)VS(0.1286)QT(0.1286)DK;M:15.9949@M(1.0000)LAESDESGDEESVSQTDK;
MLPHAPGVQMQAIPEDAIPEESGDEDEDDPDK	M[15.9949]LPHAPGVQMQAIPEDAIPEES[79.9663]GDEDEDDPDK	R	R	372	403	32	3	1M(15.9949),22S(79.9663)	sp|Q13547|HDAC1_HUMAN	Q13547	HDAC1_HUMAN	HDAC1	Histone deacetylase 1			1	0	MS/MS	STY:79.9663@MLPHAPGVQMQAIPEDAIPEES(1.0000)GDEDEDDPDK;M:15.9949@M(0.6469)LPHAPGVQM(0.3531)QAIPEDAIPEESGDEDEDDPDK;
MLPHAPGVQMQAIPEDAIPEESGDEDEDDPDKR	M[15.9949]LPHAPGVQMQAIPEDAIPEES[79.9663]GDEDEDDPDKR	R	I	372	404	33	3,4	1M(15.9949),22S(79.9663)	sp|Q13547|HDAC1_HUMAN	Q13547	HDAC1_HUMAN	HDAC1	Histone deacetylase 1			5	4586917	MS/MS	STY:79.9663@MLPHAPGVQMQAIPEDAIPEES(1.0000)GDEDEDDPDKR;M:15.9949@M(0.8723)LPHAPGVQM(0.1277)QAIPEDAIPEESGDEDEDDPDKR;
MLPHAPGVQMQAIPEDAVHEDSGDEDGEDPDKR	M[15.9949]LPHAPGVQMQAIPEDAVHEDS[79.9663]GDEDGEDPDKR	R	I	343	375	33	3,4	1M(15.9949),22S(79.9663)	sp|Q92769-3|HDAC2_HUMAN	Q92769-3	HDAC2_HUMAN	HDAC2	Isoform 2 of Histone deacetylase 2		sp|Q92769|HDAC2_HUMAN	3	6542496	MS/MS	STY:79.9663@MLPHAPGVQMQAIPEDAVHEDS(1.0000)GDEDGEDPDKR;M:15.9949@M(0.8782)LPHAPGVQM(0.1218)QAIPEDAVHEDSGDEDGEDPDKR;
MLPHAPGVQMQAIPEDAVHEDSGDEDGEDPDKR	M[15.9949]LPHAPGVQM[15.9949]QAIPEDAVHEDS[79.9663]GDEDGEDPDKR	R	I	343	375	33	4	10M(15.9949),1M(15.9949),22S(79.9663)	sp|Q92769-3|HDAC2_HUMAN	Q92769-3	HDAC2_HUMAN	HDAC2	Isoform 2 of Histone deacetylase 2		sp|Q92769|HDAC2_HUMAN	1	2.46636e+06	MS/MS	STY:79.9663@MLPHAPGVQMQAIPEDAVHEDS(1.0000)GDEDGEDPDKR;M:15.9949@M(1.0000)LPHAPGVQM(1.0000)QAIPEDAVHEDSGDEDGEDPDKR;
NAEAVLQSPGLSGK	NAEAVLQSPGLS[79.9663]GK	R	V	794	807	14	2	12S(79.9663)	sp|Q13045-2|FLII_HUMAN	Q13045-2	FLII_HUMAN	FLII	Isoform 2 of Protein flightless-1 homolog		sp|Q13045-3|FLII_HUMAN, sp|Q13045|FLII_HUMAN	1	0	MS/MS	STY:79.9663@NAEAVLQS(0.0987)PGLS(0.9013)GK;
NAEAVLQSPGLSGK	NAEAVLQS[79.9663]PGLSGK	R	V	794	807	14	2	8S(79.9663)	sp|Q13045-2|FLII_HUMAN	Q13045-2	FLII_HUMAN	FLII	Isoform 2 of Protein flightless-1 homolog		sp|Q13045-3|FLII_HUMAN, sp|Q13045|FLII_HUMAN	1	0	MS/MS	STY:79.9663@NAEAVLQS(0.5000)PGLS(0.5000)GK;
NAEEESESEAEEGD	NAEEES[79.9663]ESEAEEGD	K	-	340	353	14	2	6S(79.9663)	sp|Q7L1Q6-2|5MP2_HUMAN	Q7L1Q6-2	5MP2_HUMAN	BZW1	Isoform 2 of eIF5-mimic protein 2		sp|Q7L1Q6-3|5MP2_HUMAN, sp|Q7L1Q6-4|5MP2_HUMAN, sp|Q7L1Q6|5MP2_HUMAN	2	4198592	MS/MS	STY:79.9663@NAEEES(0.5000)ES(0.5000)EAEEGD;
NAEEESESEAEEGD	NAEEES[79.9663]ES[79.9663]EAEEGD	K	-	340	353	14	2	6S(79.9663),8S(79.9663)	sp|Q7L1Q6-2|5MP2_HUMAN	Q7L1Q6-2	5MP2_HUMAN	BZW1	Isoform 2 of eIF5-mimic protein 2		sp|Q7L1Q6-3|5MP2_HUMAN, sp|Q7L1Q6-4|5MP2_HUMAN, sp|Q7L1Q6|5MP2_HUMAN	5	1.4759499E7	MS/MS	STY:79.9663@NAEEES(1.0000)ES(1.0000)EAEEGD;
NAIASDSEADSDTEVPK	NAIASDS[79.9663]EADS[79.9663]DT[79.9663]EVPK	K	D	290	306	17	2	11S(79.9663),13T(79.9663),7S(79.9663)	sp|Q8WVC0-2|LEO1_HUMAN	Q8WVC0-2	LEO1_HUMAN	LEO1	Isoform 2 of RNA polymerase-associated protein LEO1		sp|Q8WVC0|LEO1_HUMAN	1	4.73528e+06	MS/MS	STY:79.9663@NAIAS(0.4427)DS(0.8524)EADS(0.8524)DT(0.8524)EVPK;
NAIASDSEADSDTEVPK	NAIAS[79.9663]DS[79.9663]EADSDT[79.9663]EVPK	K	D	290	306	17	2	13T(79.9663),5S(79.9663),7S(79.9663)	sp|Q8WVC0-2|LEO1_HUMAN	Q8WVC0-2	LEO1_HUMAN	LEO1	Isoform 2 of RNA polymerase-associated protein LEO1		sp|Q8WVC0|LEO1_HUMAN	1	4.73528e+06	MS/MS	STY:79.9663@NAIAS(0.8757)DS(0.8756)EADS(0.3738)DT(0.8748)EVPK;
NAIASDSEADSDTEVPK	NAIAS[79.9663]DS[79.9663]EADS[79.9663]DTEVPK	K	D	290	306	17	2	11S(79.9663),5S(79.9663),7S(79.9663)	sp|Q8WVC0-2|LEO1_HUMAN	Q8WVC0-2	LEO1_HUMAN	LEO1	Isoform 2 of RNA polymerase-associated protein LEO1		sp|Q8WVC0|LEO1_HUMAN	1	4.73528e+06	MS/MS	STY:79.9663@NAIAS(0.9279)DS(0.9279)EADS(0.9279)DT(0.2163)EVPK;
NAKKEDSDEEEDDDSEEDEEDDEDEDEDEDEIEPAAMK	NAKKEDS[79.9663]DEEEDDDS[79.9663]EEDEEDDEDEDEDEDEIEPAAMK	K	A	139	176	38	4	15S(79.9663),7S(79.9663)	sp|P19338|NUCL_HUMAN	P19338	NUCL_HUMAN	NCL	Nucleolin			1	4104425	MS/MS	STY:79.9663@NAKKEDS(1.0000)DEEEDDDS(1.0000)EEDEEDDEDEDEDEDEIEPAAMK;
NAKKEDSDEEEDDDSEEDEEDDEDEDEDEDEIEPAAMK	NAKKEDS[79.9663]DEEEDDDS[79.9663]EEDEEDDEDEDEDEDEIEPAAM[15.9949]K	K	A	139	176	38	4	15S(79.9663),37M(15.9949),7S(79.9663)	sp|P19338|NUCL_HUMAN	P19338	NUCL_HUMAN	NCL	Nucleolin			1	0	MS/MS	STY:79.9663@NAKKEDS(1.0000)DEEEDDDS(1.0000)EEDEEDDEDEDEDEDEIEPAAMK;M:15.9949@NAKKEDSDEEEDDDSEEDEEDDEDEDEDEDEIEPAAM(1.0000)K;
NALPPVLTTVNGQSPPEHSAPAK	NALPPVLT[79.9663]TVNGQSPPEHSAPAK	K	V	130	152	23	3	8T(79.9663)	sp|Q6PKG0|LARP1_HUMAN	Q6PKG0	LARP1_HUMAN	LARP1	La-related protein 1			3	4.59228e+06	MS/MS	STY:79.9663@NALPPVLT(0.7571)T(0.0810)VNGQS(0.0810)PPEHS(0.0810)APAK;
NAPAAVDEGSISPR	NAPAAVDEGS[79.9663]ISPR	R	T	373	386	14	2	10S(79.9663)	sp|P28715|ERCC5_HUMAN	P28715	ERCC5_HUMAN	ERCC5	DNA excision repair protein ERCC-5			1	0	MS/MS	STY:79.9663@NAPAAVDEGS(0.5000)IS(0.5000)PR;
NASASFQELEDK	NAS[79.9663]ASFQELEDK	R	K	45	56	12	2	3S(79.9663)	sp|Q99543-2|DNJC2_HUMAN	Q99543-2	DNJC2_HUMAN	DNAJC2	Isoform 2 of DnaJ homolog subfamily C member 2		sp|Q99543|DNJC2_HUMAN	1	0	MS/MS	STY:79.9663@NAS(0.5000)AS(0.5000)FQELEDK;
NASASFQELEDKK	NAS[79.9663]ASFQELEDKK	R	E	45	57	13	2	3S(79.9663)	sp|Q99543-2|DNJC2_HUMAN	Q99543-2	DNJC2_HUMAN	DNAJC2	Isoform 2 of DnaJ homolog subfamily C member 2		sp|Q99543|DNJC2_HUMAN	1	0	MS/MS	STY:79.9663@NAS(0.5000)AS(0.5000)FQELEDKK;
NCTSISGDLHILPVAFRGDSFTHTPPLDPQELDILKTVK	NC[57.0215]TSISGDLHILPVAFRGDS[79.9663]FT[79.9663]HT[79.9663]PPLDPQELDILKTVK	K	E	361	399	39	5	20S(79.9663),22T(79.9663),24T(79.9663),2C(57.0215)	sp|P00533-2|EGFR_HUMAN	P00533-2	EGFR_HUMAN	EGFR	Isoform 2 of Epidermal growth factor receptor		sp|P00533-3|EGFR_HUMAN, sp|P00533-4|EGFR_HUMAN, sp|P00533|EGFR_HUMAN	1	0	MS/MS	STY:79.9663@NCT(0.2391)S(0.2391)IS(0.3503)GDLHILPVAFRGDS(0.6069)FT(0.6172)HT(0.6172)PPLDPQELDILKT(0.3301)VK;
NDKSEEEQSSSSVK	NDKS[79.9663]EEEQSSSSVK	K	K	217	230	14	2	4S(79.9663)	sp|P07910-2|HNRPC_HUMAN	P07910-2	HNRPC_HUMAN	HNRNPC	Isoform C1 of Heterogeneous nuclear ribonucleoproteins C1/C2		sp|P07910-3|HNRPC_HUMAN, sp|P07910-4|HNRPC_HUMAN, sp|P07910|HNRPC_HUMAN	2	4.13006e+06	MS/MS	STY:79.9663@NDKS(0.8439)EEEQS(0.0390)S(0.0390)S(0.0390)S(0.0390)VK;
NDSDLFGLGLEEAGPKESSEEGK	NDS[79.9663]DLFGLGLEEAGPKES[79.9663]SEEGK	K	E	624	646	23	3	18S(79.9663),3S(79.9663)	sp|Q3YEC7-2|RABL6_HUMAN	Q3YEC7-2	RABL6_HUMAN	RABL6	Isoform 2 of Rab-like protein 6		sp|Q3YEC7|RABL6_HUMAN	1	0	MS/MS	STY:79.9663@NDS(0.6845)DLFGLGLEEAGPKES(0.6577)S(0.6577)EEGK;
NEEDEGHSNSSPR	NEEDEGHSNS[79.9663]SPR	K	H	73	85	13	2	10S(79.9663)	sp|Q14103-3|HNRPD_HUMAN	Q14103-3	HNRPD_HUMAN	HNRNPD	Isoform 3 of Heterogeneous nuclear ribonucleoprotein D0		sp|Q14103|HNRPD_HUMAN	1	1.42818784E8	MS/MS	STY:79.9663@NEEDEGHS(0.0325)NS(0.4837)S(0.4837)PR;
NEEDEGHSNSSPR	NEEDEGHS[79.9663]NSSPR	K	H	73	85	13	2	8S(79.9663)	sp|Q14103-3|HNRPD_HUMAN	Q14103-3	HNRPD_HUMAN	HNRNPD	Isoform 3 of Heterogeneous nuclear ribonucleoprotein D0		sp|Q14103|HNRPD_HUMAN	4	1.45819664E8	MS/MS	STY:79.9663@NEEDEGHS(0.3380)NS(0.3380)S(0.3239)PR;
NEEDEGHSNSSPR	NEEDEGHS[79.9663]NSS[79.9663]PR	K	H	73	85	13	2	11S(79.9663),8S(79.9663)	sp|Q14103-3|HNRPD_HUMAN	Q14103-3	HNRPD_HUMAN	HNRNPD	Isoform 3 of Heterogeneous nuclear ribonucleoprotein D0		sp|Q14103|HNRPD_HUMAN	1	0	MS/MS	STY:79.9663@NEEDEGHS(0.6578)NS(0.6578)S(0.6844)PR;
NEENTEPGAESSENADDPNKDTSENADGQSDENKDDYTIPDEYR	NEENTEPGAESSENADDPNKDTSENADGQSDENKDDY[79.9663]TIPDEYR	K	I	737	780	44	4	37Y(79.9663)	sp|P43243|MATR3_HUMAN	P43243	MATR3_HUMAN	MATR3	Matrin-3		sp|P43243-2|MATR3_HUMAN	1	2571678	MS/MS	STY:79.9663@NEENT(0.0372)EPGAES(0.0372)S(0.0372)ENADDPNKDT(0.0372)S(0.0372)ENADGQS(0.0372)DENKDDY(0.2589)T(0.2589)IPDEY(0.2589)R;
NEEPSEEEIDAPK	NEEPS[79.9663]EEEIDAPK	K	P	49	61	13	2	5S(79.9663)	sp|Q9NR30-2|DDX21_HUMAN	Q9NR30-2	DDX21_HUMAN	DDX21	Isoform 2 of Nucleolar RNA helicase 2		sp|Q9NR30|DDX21_HUMAN	1	1.42721e+06	MS/MS	STY:79.9663@NEEPS(1.0000)EEEIDAPK;
NEEPSEEEIDAPKPK	NEEPS[79.9663]EEEIDAPKPK	K	K	49	63	15	2,3	5S(79.9663)	sp|Q9NR30-2|DDX21_HUMAN	Q9NR30-2	DDX21_HUMAN	DDX21	Isoform 2 of Nucleolar RNA helicase 2		sp|Q9NR30|DDX21_HUMAN	7	1.953539E7	MS/MS	STY:79.9663@NEEPS(1.0000)EEEIDAPKPK;
NEGSESAPEGQAQQR	NEGSES[79.9663]APEGQAQQR	K	R	171	185	15	2	6S(79.9663)	sp|P67809|YBOX1_HUMAN	P67809	YBOX1_HUMAN	YBX1	Y-box-binding protein 1			2	3.47842E7	MS/MS	STY:79.9663@NEGS(0.0793)ES(0.9207)APEGQAQQR;
NEGSESAPEGQAQQR	NEGS[79.9663]ESAPEGQAQQR	K	R	171	185	15	2,3	4S(79.9663)	sp|P67809|YBOX1_HUMAN	P67809	YBOX1_HUMAN	YBX1	Y-box-binding protein 1			9	3.6343124E7	MS/MS	STY:79.9663@NEGS(0.9414)ES(0.0586)APEGQAQQR;
NEGSESAPEGQAQQR	NEGS[79.9663]ES[79.9663]APEGQAQQR	K	R	171	185	15	2	4S(79.9663),6S(79.9663)	sp|P67809|YBOX1_HUMAN	P67809	YBOX1_HUMAN	YBX1	Y-box-binding protein 1			2	3.23572e+06	MS/MS	STY:79.9663@NEGS(1.0000)ES(1.0000)APEGQAQQR;
NENTEGSPQEDGVELEGLK	NENT[79.9663]EGSPQEDGVELEGLK	K	Q	1267	1285	19	2	4T(79.9663)	sp|P11388-2|TOP2A_HUMAN	P11388-2	TOP2A_HUMAN	TOP2A	Isoform 2 of DNA topoisomerase 2-alpha		sp|P11388-3|TOP2A_HUMAN, sp|P11388-4|TOP2A_HUMAN, sp|P11388|TOP2A_HUMAN	2	5486932	MS/MS	STY:79.9663@NENT(0.5000)EGS(0.5000)PQEDGVELEGLK;
NESEDNKFSDDSDDDFVQPR	NES[79.9663]EDNKFS[79.9663]DDSDDDFVQPR	R	K	983	1002	20	3	3S(79.9663),9S(79.9663)	sp|O15164-2|TIF1A_HUMAN	O15164-2	TIF1A_HUMAN	TRIM24	Isoform Short of Transcription intermediary factor 1-alpha		sp|O15164|TIF1A_HUMAN	1	0	MS/MS	STY:79.9663@NES(0.6667)EDNKFS(0.6667)DDS(0.6667)DDDFVQPR;
NFYESDDDQK	NFY[79.9663]ESDDDQK	K	E	223	232	10	2	3Y(79.9663)	sp|O00203-3|AP3B1_HUMAN	O00203-3	AP3B1_HUMAN	AP3B1	Isoform 2 of AP-3 complex subunit beta-1		sp|O00203|AP3B1_HUMAN	2	4.95168e+06	MS/MS	STY:79.9663@NFY(0.5000)ES(0.5000)DDDQK;
NGEVVHTPETSV	NGEVVHTPET[79.9663]SV	K	-	454	465	12	2	10T(79.9663)	sp|O15427|MOT4_HUMAN	O15427	MOT4_HUMAN	SLC16A3	Monocarboxylate transporter 4			1	1.21342e+06	MS/MS	STY:79.9663@NGEVVHT(0.0394)PET(0.4803)S(0.4803)V;
NGFPHPEPDCNPSEAASEESNSEIEQEIPVEQK	NGFPHPEPDC[57.0215]NPSEAAS[79.9663]EES[79.9663]NS[79.9663]EIEQEIPVEQK	K	E	84	116	33	3	10C(57.0215),17S(79.9663),20S(79.9663),22S(79.9663)	sp|Q9NR30-2|DDX21_HUMAN	Q9NR30-2	DDX21_HUMAN	DDX21	Isoform 2 of Nucleolar RNA helicase 2		sp|Q9NR30|DDX21_HUMAN	2	0	MS/MS	STY:79.9663@NGFPHPEPDCNPS(0.2955)EAAS(0.9015)EES(0.9015)NS(0.9015)EIEQEIPVEQK;
NGFPHPEPDCNPSEAASEESNSEIEQEIPVEQK	NGFPHPEPDC[57.0215]NPS[79.9663]EAAS[79.9663]EESNSEIEQEIPVEQK	K	E	84	116	33	3	10C(57.0215),13S(79.9663),17S(79.9663)	sp|Q9NR30-2|DDX21_HUMAN	Q9NR30-2	DDX21_HUMAN	DDX21	Isoform 2 of Nucleolar RNA helicase 2		sp|Q9NR30|DDX21_HUMAN	1	0	MS/MS	STY:79.9663@NGFPHPEPDCNPS(0.5000)EAAS(0.5000)EES(0.5000)NS(0.5000)EIEQEIPVEQK;
NGGEDTDNEEGEEENPLEIK	NGGEDT[79.9663]DNEEGEEENPLEIK	K	E	4893	4912	20	2	6T(79.9663)	sp|Q9NU22|MDN1_HUMAN	Q9NU22	MDN1_HUMAN	MDN1	Midasin			1	0	MS/MS	STY:79.9663@NGGEDT(1.0000)DNEEGEEENPLEIK;
NGSLDSPGKQDTEEDEEEDEK	NGSLDS[79.9663]PGKQDT[79.9663]EEDEEEDEK	K	D	134	154	21	3	12T(79.9663),6S(79.9663)	sp|Q9Y266|NUDC_HUMAN	Q9Y266	NUDC_HUMAN	NUDC	Nuclear migration protein nudC			1	1.74625e+06	MS/MS	STY:79.9663@NGS(0.5514)LDS(0.7243)PGKQDT(0.7243)EEDEEEDEK;
NGSLDSPGKQDTEEDEEEDEK	NGS[79.9663]LDSPGKQDTEEDEEEDEK	K	D	134	154	21	2,3	3S(79.9663)	sp|Q9Y266|NUDC_HUMAN	Q9Y266	NUDC_HUMAN	NUDC	Nuclear migration protein nudC			5	7808343	MS/MS	STY:79.9663@NGS(0.4616)LDS(0.4616)PGKQDT(0.0767)EEDEEEDEK;
NGVAAEVSPAK	NGVAAEVS[79.9663]PAK	K	E	118	128	11	2	8S(79.9663)	sp|Q9BW71|HIRP3_HUMAN	Q9BW71	HIRP3_HUMAN	HIRIP3	HIRA-interacting protein 3			1	1.28999e+06	MS/MS	STY:79.9663@NGVAAEVS(1.0000)PAK;
NHETDGGSAHGDDDDDGPHFEPVVPLPDK	NHET[79.9663]DGGSAHGDDDDDGPHFEPVVPLPDK	K	I	1153	1181	29	3,4	4T(79.9663)	sp|P49792|RBP2_HUMAN	P49792	RBP2_HUMAN	RANBP2	E3 SUMO-protein ligase RanBP2			5	8.18363e+06	MS/MS	STY:79.9663@NHET(0.6473)DGGS(0.3527)AHGDDDDDGPHFEPVVPLPDK;
NHLSPQQGGATPQVPSPCCR	NHLSPQQGGAT[79.9663]PQVPSPC[57.0215]C[57.0215]R	K	F	166	185	20	3	11T(79.9663),18C(57.0215),19C(57.0215)	sp|Q9H4L4|SENP3_HUMAN	Q9H4L4	SENP3_HUMAN	SENP3	Sentrin-specific protease 3			1	3.65811e+06	MS/MS	STY:79.9663@NHLS(0.1630)PQQGGAT(0.6306)PQVPS(0.2064)PCCR;
NHSDSSTSESEVSSVSPLK	NHSDSS[79.9663]TSESEVSSVSPLK	K	N	154	172	19	2	6S(79.9663)	sp|Q9NY27-2|PP4R2_HUMAN	Q9NY27-2	PP4R2_HUMAN	PPP4R2	Isoform 2 of Serine/threonine-protein phosphatase 4 regulatory subunit 2		sp|Q9NY27-3|PP4R2_HUMAN, sp|Q9NY27|PP4R2_HUMAN	1	0	MS/MS	STY:79.9663@NHS(0.0052)DS(0.0306)S(0.1604)T(0.1604)S(0.1604)ES(0.1604)EVS(0.0242)S(0.1492)VS(0.1492)PLK;
NHSVNEEEQEEQGEGSEDEWEQVGPR	NHSVNEEEQEEQGEGS[79.9663]EDEWEQVGPR	K	N	609	634	26	3	16S(79.9663)	sp|Q14694-2|UBP10_HUMAN	Q14694-2	UBP10_HUMAN	USP10	Isoform 2 of Ubiquitin carboxyl-terminal hydrolase 10		sp|Q14694-3|UBP10_HUMAN, sp|Q14694|UBP10_HUMAN	4	1.0343602E7	MS/MS	STY:79.9663@NHS(0.1292)VNEEEQEEQGEGS(0.8708)EDEWEQVGPR;
NHSVNEEEQEEQGEGSEDEWEQVGPR	NHS[79.9663]VNEEEQEEQGEGSEDEWEQVGPR	K	N	609	634	26	3	3S(79.9663)	sp|Q14694-2|UBP10_HUMAN	Q14694-2	UBP10_HUMAN	USP10	Isoform 2 of Ubiquitin carboxyl-terminal hydrolase 10		sp|Q14694-3|UBP10_HUMAN, sp|Q14694|UBP10_HUMAN	2	1.0343602E7	MS/MS	STY:79.9663@NHS(0.5248)VNEEEQEEQGEGS(0.4752)EDEWEQVGPR;
NIIHGSDSVK	NIIHGSDS[79.9663]VK	R	S	230	239	10	2	8S(79.9663)	sp|P22392-2|NDKB_HUMAN	P22392-2	NDKB_HUMAN	NME2	Isoform 3 of Nucleoside diphosphate kinase B	NME2P1	sp|O60361|NDK8_HUMAN, sp|P22392|NDKB_HUMAN	1	1.1947e+06	MS/MS	STY:79.9663@NIIHGS(0.1633)DS(0.8367)VK;
NIIHGSDSVESAEK	NIIHGS[79.9663]DSVESAEK	R	E	140	153	14	2	6S(79.9663)	sp|P15531-2|NDKA_HUMAN	P15531-2	NDKA_HUMAN	NME1	Isoform 2 of Nucleoside diphosphate kinase A		sp|P15531|NDKA_HUMAN	1	0	MS/MS	STY:79.9663@NIIHGS(0.3333)DS(0.3333)VES(0.3333)AEK;
NKPGPNIESGNEDDDASFK	NKPGPNIESGNEDDDAS[79.9663]FK	K	I	206	224	19	2	17S(79.9663)	sp|O60841|IF2P_HUMAN	O60841	IF2P_HUMAN	EIF5B	Eukaryotic translation initiation factor 5B			1	3.0800794E7	MS/MS	STY:79.9663@NKPGPNIES(0.4400)GNEDDDAS(0.5600)FK;
NKPGPNIESGNEDDDASFK	NKPGPNIES[79.9663]GNEDDDASFK	K	I	206	224	19	2	9S(79.9663)	sp|O60841|IF2P_HUMAN	O60841	IF2P_HUMAN	EIF5B	Eukaryotic translation initiation factor 5B			2	3.056356E7	MS/MS	STY:79.9663@NKPGPNIES(0.9198)GNEDDDAS(0.0802)FK;
NLALDEAGQRSTM	NLALDEAGQRS[79.9663]TM	R	-	216	228	13	2	11S(79.9663)	sp|Q53TN4-3|CYBR1_HUMAN	Q53TN4-3	CYBR1_HUMAN	CYBRD1	Isoform 3 of Plasma membrane ascorbate-dependent reductase CYBRD1		sp|Q53TN4|CYBR1_HUMAN	1	0	MS/MS	STY:79.9663@NLALDEAGQRS(0.5000)T(0.5000)M;
NLSPGAVESDVR	NLS[79.9663]PGAVESDVR	K	G	171	182	12	2	3S(79.9663)	sp|P53621-2|COPA_HUMAN	P53621-2	COPA_HUMAN	COPA	Isoform 2 of Coatomer subunit alpha		sp|P53621|COPA_HUMAN	2	1370108	MS/MS	STY:79.9663@NLS(0.8672)PGAVES(0.1328)DVR;
NLSPSQEEAGLEDGVSGEISDTELEQTDSCAEPLSEGR	NLS[79.9663]PSQEEAGLEDGVS[79.9663]GEISDTELEQTDSC[57.0215]AEPLSEGR	R	K	507	544	38	3	16S(79.9663),30C(57.0215),3S(79.9663)	sp|O95453-2|PARN_HUMAN	O95453-2	PARN_HUMAN	PARN	Isoform 2 of Poly(A)-specific ribonuclease PARN		sp|O95453-3|PARN_HUMAN, sp|O95453-4|PARN_HUMAN, sp|O95453|PARN_HUMAN	1	0	MS/MS	STY:79.9663@NLS(0.5141)PS(0.5141)QEEAGLEDGVS(0.6243)GEIS(0.0411)DT(0.0411)ELEQT(0.0654)DS(0.1609)CAEPLS(0.0390)EGR;
NLSSDEATNPISR	NLS[79.9663]SDEATNPISR	K	V	110	122	13	2	3S(79.9663)	sp|Q7Z417|NUFP2_HUMAN	Q7Z417	NUFP2_HUMAN	NUFIP2	FMR1-interacting protein NUFIP2			1	0	MS/MS	STY:79.9663@NLS(0.4717)S(0.4717)DEAT(0.0283)NPIS(0.0283)R;
NMAINPSK	NM[15.9949]AINPS[79.9663]K	K	E	40	47	8	2	2M(15.9949),7S(79.9663)	sp|P02663|CASA2_BOVIN	P02663	CASA2_BOVIN	CSN1S2	Alpha-S2-casein			1	9615304	MS/MS	STY:79.9663@NMAINPS(1.0000)K;M:15.9949@NM(1.0000)AINPSK;
NRPDYVSEEEEDDEDFETAVK	NRPDYVSEEEEDDEDFET[79.9663]AVK	K	K	2662	2682	21	3	18T(79.9663)	sp|P49792|RBP2_HUMAN	P49792	RBP2_HUMAN	RANBP2	E3 SUMO-protein ligase RanBP2			1	2.13775e+06	MS/MS	STY:79.9663@NRPDY(0.0650)VS(0.0754)EEEEDDEDFET(0.8596)AVK;
NRSAEEGELAESK	NRS[79.9663]AEEGELAESK	R	S	1664	1676	13	2	3S(79.9663)	sp|Q9C0C2|TB182_HUMAN	Q9C0C2	TB182_HUMAN	TNKS1BP1	182 kDa tankyrase-1-binding protein			1	2167802	MS/MS	STY:79.9663@NRS(0.5000)AEEGELAES(0.5000)K;
NSQEDSEDSEDK	NSQEDSEDS[79.9663]EDK	K	D	53	64	12	2	9S(79.9663)	sp|Q9H1E3|NUCKS_HUMAN	Q9H1E3	NUCKS_HUMAN	NUCKS1	Nuclear ubiquitous casein and cyclin-dependent kinase substrate 1			1	7.66313e+06	MS/MS	STY:79.9663@NS(0.3062)QEDS(0.3062)EDS(0.3877)EDK;
NSVDTATSSSLSTPSEPLSPTSSLGEERN	NSVDTATSSSLSTPSEPLS[79.9663]PTSSLGEERN	R	-	645	673	29	3	19S(79.9663)	sp|P13807-2|GYS1_HUMAN	P13807-2	GYS1_HUMAN	GYS1	Isoform 2 of Glycogen [starch] synthase, muscle		sp|P13807|GYS1_HUMAN	1	2.2578e+06	MS/MS	STY:79.9663@NS(0.0153)VDT(0.0153)AT(0.0153)S(0.0153)S(0.0153)S(0.0153)LS(0.0153)T(0.0153)PS(0.0153)EPLS(0.2156)PT(0.2156)S(0.2156)S(0.2156)LGEERN;
NSPGSQVASNPR	NS[79.9663]PGSQVASNPR	R	Q	371	382	12	2	2S(79.9663)	sp|Q9H0D6-2|XRN2_HUMAN	Q9H0D6-2	XRN2_HUMAN	XRN2	Isoform 2 of 5'-3' exoribonuclease 2		sp|Q9H0D6|XRN2_HUMAN	1	977879	MS/MS	STY:79.9663@NS(0.9106)PGS(0.0447)QVAS(0.0447)NPR;
NSQEDSEDSEDK	NS[79.9663]QEDSEDSEDK	K	D	53	64	12	2	2S(79.9663)	sp|Q9H1E3|NUCKS_HUMAN	Q9H1E3	NUCKS_HUMAN	NUCKS1	Nuclear ubiquitous casein and cyclin-dependent kinase substrate 1			1	7.66313e+06	MS/MS	STY:79.9663@NS(0.8964)QEDS(0.0518)EDS(0.0518)EDK;
NSQEDSEDSEDK	NS[79.9663]QEDS[79.9663]EDSEDK	K	D	53	64	12	2	2S(79.9663),6S(79.9663)	sp|Q9H1E3|NUCKS_HUMAN	Q9H1E3	NUCKS_HUMAN	NUCKS1	Nuclear ubiquitous casein and cyclin-dependent kinase substrate 1			1	1.3850154E7	MS/MS	STY:79.9663@NS(0.6667)QEDS(0.6667)EDS(0.6667)EDK;
NSSEASSGDFLDLK	NS[79.9663]SEASSGDFLDLK	R	G	40	53	14	2	2S(79.9663)	sp|Q9UK76-3|JUPI1_HUMAN	Q9UK76-3	JUPI1_HUMAN	JPT1	Isoform 3 of Jupiter microtubule associated homolog 1		sp|Q9UK76-2|JUPI1_HUMAN, sp|Q9UK76|JUPI1_HUMAN	2	0	MS/MS	STY:79.9663@NS(0.8721)S(0.0532)EAS(0.0532)S(0.0215)GDFLDLK;
NSSPAPPQPAPGK	NS[79.9663]SPAPPQPAPGK	K	V	1081	1093	13	2	2S(79.9663)	sp|Q9NYV4-2|CDK12_HUMAN	Q9NYV4-2	CDK12_HUMAN	CDK12	Isoform 2 of Cyclin-dependent kinase 12		sp|Q9NYV4-3|CDK12_HUMAN, sp|Q9NYV4|CDK12_HUMAN	4	1564886	MS/MS	STY:79.9663@NS(0.5000)S(0.5000)PAPPQPAPGK;
NTEESSSPVRK	NTEESSS[79.9663]PVRK	R	E	104	114	11	2	7S(79.9663)	sp|Q5T200-2|ZC3HD_HUMAN	Q5T200-2	ZC3HD_HUMAN	ZC3H13	Isoform 2 of Zinc finger CCCH domain-containing protein 13		sp|Q5T200|ZC3HD_HUMAN	1	0	MS/MS	STY:79.9663@NT(0.0241)EES(0.0341)S(0.0341)S(0.9078)PVRK;
NTFTAWSDEESDYEIDDRDVNK	NTFTAWS[79.9663]DEESDYEIDDRDVNK	K	I	621	642	22	3	7S(79.9663)	sp|Q6PKG0|LARP1_HUMAN	Q6PKG0	LARP1_HUMAN	LARP1	La-related protein 1		sp|Q6PKG0-3|LARP1_HUMAN	1	5417428	MS/MS	STY:79.9663@NT(0.0100)FT(0.0115)AWS(0.3262)DEES(0.3262)DY(0.3262)EIDDRDVNK;
NTFTAWSDEESDYEIDDRDVNK	NTFTAWS[79.9663]DEES[79.9663]DYEIDDRDVNK	K	I	621	642	22	3	11S(79.9663),7S(79.9663)	sp|Q6PKG0|LARP1_HUMAN	Q6PKG0	LARP1_HUMAN	LARP1	La-related protein 1		sp|Q6PKG0-3|LARP1_HUMAN	1	5.32245e+06	MS/MS	STY:79.9663@NT(0.1647)FT(0.1647)AWS(0.5969)DEES(0.5368)DY(0.5368)EIDDRDVNK;
NTPSQHSHSIQHSPER	NTPSQHS[79.9663]HSIQHSPER	K	S	254	269	16	3	7S(79.9663)	sp|Q9NYF8-2|BCLF1_HUMAN	Q9NYF8-2	BCLF1_HUMAN	BCLAF1	Isoform 2 of Bcl-2-associated transcription factor 1		sp|Q9NYF8-3|BCLF1_HUMAN, sp|Q9NYF8-4|BCLF1_HUMAN, sp|Q9NYF8|BCLF1_HUMAN	1	1.1382497E7	MS/MS	STY:79.9663@NT(0.0089)PS(0.0089)QHS(0.3274)HS(0.3274)IQHS(0.3274)PER;
NTVLATWQPYTNTIANK	NTVLATWQPY[79.9663]TNTIANK	K	L	87	103	17	2	10Y(79.9663)	sp|Q9BY44-4|EIF2A_HUMAN	Q9BY44-4	EIF2A_HUMAN	EIF2A	Isoform 4 of Eukaryotic translation initiation factor 2A			1	5.34521e+06	MS/MS	STY:79.9663@NT(0.0471)VLAT(0.0471)WQPY(0.8700)T(0.0179)NT(0.0179)IANK;
NVHSEDFENR	NVHS[79.9663]EDFENR	R	I	95	104	10	2	4S(79.9663)	sp|Q9H2P0|ADNP_HUMAN	Q9H2P0	ADNP_HUMAN	ADNP	Activity-dependent neuroprotector homeobox protein			1	0	MS/MS	STY:79.9663@NVHS(1.0000)EDFENR;
NVQQDNSEAGTQPQVQTDAQQTSQSPPSPELTSEENKIPDADK	NVQQDNSEAGTQPQVQT[79.9663]DAQQTSQSPPSPELTSEENKIPDADK	K	A	489	531	43	4	17T(79.9663)	sp|Q92598-3|HS105_HUMAN	Q92598-3	HS105_HUMAN	HSPH1	Isoform 3 of Heat shock protein 105 kDa		sp|Q92598-4|HS105_HUMAN, sp|Q92598|HS105_HUMAN	1	1.569754E7	MS/MS	STY:79.9663@NVQQDNS(0.0373)EAGT(0.1364)QPQVQT(0.7025)DAQQT(0.0250)S(0.0250)QS(0.0250)PPS(0.0250)PELT(0.0119)S(0.0119)EENKIPDADK;
NVQQDNSEAGTQPQVQTDAQQTSQSPPSPELTSEENKIPDADK	NVQQDNS[79.9663]EAGTQPQVQTDAQQTSQSPPSPELTSEENKIPDADK	K	A	489	531	43	4	7S(79.9663)	sp|Q92598-3|HS105_HUMAN	Q92598-3	HS105_HUMAN	HSPH1	Isoform 3 of Heat shock protein 105 kDa		sp|Q92598-4|HS105_HUMAN, sp|Q92598|HS105_HUMAN	2	1.569754E7	MS/MS	STY:79.9663@NVQQDNS(0.6342)EAGT(0.0173)QPQVQT(0.0173)DAQQT(0.0605)S(0.0605)QS(0.0605)PPS(0.0605)PELT(0.0605)S(0.0287)EENKIPDADK;
NVSSFPDDATSPLQENR	NVSSFPDDAT[79.9663]SPLQENR	R	N	52	68	17	2	10T(79.9663)	sp|P52292|IMA1_HUMAN	P52292	IMA1_HUMAN	KPNA2	Importin subunit alpha-1			2	6923497	MS/MS	STY:79.9663@NVS(0.0213)S(0.0213)FPDDAT(0.4787)S(0.4787)PLQENR;
NVSSFPDDATSPLQENR	NVS[79.9663]SFPDDATSPLQENR	R	N	52	68	17	2	3S(79.9663)	sp|P52292|IMA1_HUMAN	P52292	IMA1_HUMAN	KPNA2	Importin subunit alpha-1			1	6923497	MS/MS	STY:79.9663@NVS(0.3108)S(0.3108)FPDDAT(0.3108)S(0.0677)PLQENR;
NWTEDMEGGISSPVK	NWTEDMEGGISS[79.9663]PVK	R	K	303	317	15	2	12S(79.9663)	sp|P08651-2|NFIC_HUMAN	P08651-2	NFIC_HUMAN	NFIC	Isoform 1 of Nuclear factor 1 C-type		sp|P08651-3|NFIC_HUMAN, sp|P08651-4|NFIC_HUMAN, sp|P08651-5|NFIC_HUMAN, sp|P08651-6|NFIC_HUMAN, sp|P08651|NFIC_HUMAN	1	0	MS/MS	STY:79.9663@NWT(0.0496)EDMEGGIS(0.0685)S(0.8819)PVK;
NWTEDMEGGISSPVK	NWT[79.9663]EDMEGGISSPVK	R	K	303	317	15	2	3T(79.9663)	sp|P08651-2|NFIC_HUMAN	P08651-2	NFIC_HUMAN	NFIC	Isoform 1 of Nuclear factor 1 C-type		sp|P08651-3|NFIC_HUMAN, sp|P08651-4|NFIC_HUMAN, sp|P08651-5|NFIC_HUMAN, sp|P08651-6|NFIC_HUMAN, sp|P08651|NFIC_HUMAN	1	0	MS/MS	STY:79.9663@NWT(0.3333)EDMEGGIS(0.3333)S(0.3333)PVK;
NYAGEEEEEGSGSSEGFDPPATDR	NYAGEEEEEGSGSS[79.9663]EGFDPPATDR	R	Q	191	214	24	3	14S(79.9663)	sp|P16989-3|YBOX3_HUMAN	P16989-3	YBOX3_HUMAN	YBX3	Isoform 3 of Y-box-binding protein 3		sp|P16989|YBOX3_HUMAN	2	2.41823e+06	MS/MS	STY:79.9663@NY(0.1317)AGEEEEEGS(0.1317)GS(0.1317)S(0.5087)EGFDPPAT(0.0961)DR;
NYAGEEEEEGSGSSEGFDPPATDR	NYAGEEEEEGS[79.9663]GS[79.9663]S[79.9663]EGFDPPATDR	R	Q	191	214	24	3	11S(79.9663),13S(79.9663),14S(79.9663)	sp|P16989-3|YBOX3_HUMAN	P16989-3	YBOX3_HUMAN	YBX3	Isoform 3 of Y-box-binding protein 3		sp|P16989|YBOX3_HUMAN	1	1.49264e+06	MS/MS	STY:79.9663@NY(0.2772)AGEEEEEGS(0.8693)GS(0.8693)S(0.8693)EGFDPPAT(0.1150)DR;
NYQQNYQNSESGEK	NYQQNYQNS[79.9663]ESGEK	R	N	157	170	14	2	9S(79.9663)	sp|P67809|YBOX1_HUMAN	P67809	YBOX1_HUMAN	YBX1	Y-box-binding protein 1			2	1.7654052E7	MS/MS	STY:79.9663@NY(0.1341)QQNY(0.1619)QNS(0.6805)ES(0.0235)GEK;
NYQQNYQNSESGEK	NYQQNY[79.9663]QNSESGEK	R	N	157	170	14	2	6Y(79.9663)	sp|P67809|YBOX1_HUMAN	P67809	YBOX1_HUMAN	YBX1	Y-box-binding protein 1			2	3.2462598E7	MS/MS	STY:79.9663@NY(0.0137)QQNY(0.3288)QNS(0.3288)ES(0.3288)GEK;
NYAGEEEEEGSGSSEGFDPPATDR	NY[79.9663]AGEEEEEGSGSSEGFDPPATDR	R	Q	191	214	24	3	2Y(79.9663)	sp|P16989-3|YBOX3_HUMAN	P16989-3	YBOX3_HUMAN	YBX3	Isoform 3 of Y-box-binding protein 3		sp|P16989|YBOX3_HUMAN	1	2.41823e+06	MS/MS	STY:79.9663@NY(0.2461)AGEEEEEGS(0.2461)GS(0.2461)S(0.2461)EGFDPPAT(0.0155)DR;
NYAGEEEEEGSGSSEGFDPPATDR	NY[79.9663]AGEEEEEGS[79.9663]GS[79.9663]SEGFDPPATDR	R	Q	191	214	24	3	11S(79.9663),13S(79.9663),2Y(79.9663)	sp|P16989-3|YBOX3_HUMAN	P16989-3	YBOX3_HUMAN	YBX3	Isoform 3 of Y-box-binding protein 3		sp|P16989|YBOX3_HUMAN	3	1.49264e+06	MS/MS	STY:79.9663@NY(0.6831)AGEEEEEGS(0.6831)GS(0.6831)S(0.6831)EGFDPPAT(0.2677)DR;
NYQQNYQNSESGEK	NY[79.9663]QQNYQNSESGEK	R	N	157	170	14	2	2Y(79.9663)	sp|P67809|YBOX1_HUMAN	P67809	YBOX1_HUMAN	YBX1	Y-box-binding protein 1			1	1.4808546E7	MS/MS	STY:79.9663@NY(0.3298)QQNY(0.3298)QNS(0.3298)ES(0.0106)GEK;
NYSREQHGVAASCLEDLR	NY[79.9663]SREQHGVAASC[57.0215]LEDLR	R	S	26	43	18	3	13C(57.0215),2Y(79.9663)	sp|O00273|DFFA_HUMAN	O00273	DFFA_HUMAN	DFFA	DNA fragmentation factor subunit alpha		sp|O00273-2|DFFA_HUMAN	1	0	MS/MS	STY:79.9663@NY(0.3333)S(0.3333)REQHGVAAS(0.3333)CLEDLR;
PAASPRPR	PAAS[79.9663]PRPR	K	R	8	15	8	2	4S(79.9663)	sp|P20810-10|ICAL_HUMAN	P20810-10	ICAL_HUMAN	CAST	Isoform 10 of Calpastatin		sp|P20810-5|ICAL_HUMAN, sp|P20810-6|ICAL_HUMAN, sp|P20810-7|ICAL_HUMAN, sp|P20810-9|ICAL_HUMAN	1	5144057	MS/MS	STY:79.9663@PAAS(1.0000)PRPR;
PADPREPLENSASESSDTELPEK	PADPREPLENS[79.9663]AS[79.9663]ES[79.9663]SDTELPEK	R	E	36	58	23	3	11S(79.9663),13S(79.9663),15S(79.9663)	sp|P78337|PITX1_HUMAN	P78337	PITX1_HUMAN	PITX1	Pituitary homeobox 1			1	0	MS/MS	STY:79.9663@PADPREPLENS(0.6184)AS(0.6184)ES(0.5877)S(0.5877)DT(0.5877)ELPEK;
PAETPVATSPTATDSTSGDSSR	PAETPVATSPT[79.9663]ATDSTSGDSSR	K	S	80	101	22	2	11T(79.9663)	sp|P54727-2|RD23B_HUMAN	P54727-2	RD23B_HUMAN	RAD23B	Isoform 2 of UV excision repair protein RAD23 homolog B		sp|P54727|RD23B_HUMAN	1	2.5291556E7	MS/MS	STY:79.9663@PAET(0.0168)PVAT(0.0085)S(0.0085)PT(0.1380)AT(0.1380)DS(0.1380)T(0.1380)S(0.1380)GDS(0.1380)S(0.1380)R;
PAETPVATSPTATDSTSGDSSR	PAETPVAT[79.9663]SPTATDSTSGDSSR	K	S	80	101	22	2,3	8T(79.9663)	sp|P54727-2|RD23B_HUMAN	P54727-2	RD23B_HUMAN	RAD23B	Isoform 2 of UV excision repair protein RAD23 homolog B		sp|P54727|RD23B_HUMAN	3	2.851759E7	MS/MS	STY:79.9663@PAET(0.0063)PVAT(0.4700)S(0.4700)PT(0.0119)AT(0.0070)DS(0.0070)T(0.0070)S(0.0070)GDS(0.0068)S(0.0068)R;
PAETPVATSPTATDSTSGDSSR	PAET[79.9663]PVATSPTATDSTSGDSSR	K	S	80	101	22	2,3	4T(79.9663)	sp|P54727-2|RD23B_HUMAN	P54727-2	RD23B_HUMAN	RAD23B	Isoform 2 of UV excision repair protein RAD23 homolog B		sp|P54727|RD23B_HUMAN	3	2.84633E7	MS/MS	STY:79.9663@PAET(0.7717)PVAT(0.0278)S(0.0278)PT(0.0079)AT(0.0079)DS(0.0079)T(0.0462)S(0.0462)GDS(0.0282)S(0.0282)R;
PAMPQDSVPSPR	PAMPQDSVPS[79.9663]PR	K	S	472	483	12	2	10S(79.9663)	sp|P53396|ACLY_HUMAN	P53396	ACLY_HUMAN	ACLY	ATP-citrate synthase			1	2457885	MS/MS	STY:79.9663@PAMPQDS(0.1373)VPS(0.8627)PR;
PAMPQDSVPSPR	PAMPQDS[79.9663]VPSPR	K	S	472	483	12	2	7S(79.9663)	sp|P53396|ACLY_HUMAN	P53396	ACLY_HUMAN	ACLY	ATP-citrate synthase			4	4.49364e+06	MS/MS	STY:79.9663@PAMPQDS(0.5000)VPS(0.5000)PR;
PAPPAPPPPQNLQPESDAPQQPGSSPR	PAPPAPPPPQNLQPESDAPQQPGS[79.9663]SPR	K	G	977	1003	27	3	24S(79.9663)	sp|Q9Y618-4|NCOR2_HUMAN	Q9Y618-4	NCOR2_HUMAN	NCOR2	Isoform 3 of Nuclear receptor corepressor 2		sp|Q9Y618-5|NCOR2_HUMAN, sp|Q9Y618|NCOR2_HUMAN	1	2.08873e+06	MS/MS	STY:79.9663@PAPPAPPPPQNLQPES(0.0205)DAPQQPGS(0.4897)S(0.4897)PR;
PAPPAPPPPQNLQPESDAPQQPGSSPR	PAPPAPPPPQNLQPES[79.9663]DAPQQPGSSPR	K	G	977	1003	27	3	16S(79.9663)	sp|Q9Y618-4|NCOR2_HUMAN	Q9Y618-4	NCOR2_HUMAN	NCOR2	Isoform 3 of Nuclear receptor corepressor 2		sp|Q9Y618-5|NCOR2_HUMAN, sp|Q9Y618|NCOR2_HUMAN	1	2582074	MS/MS	STY:79.9663@PAPPAPPPPQNLQPES(0.5934)DAPQQPGS(0.2033)S(0.2033)PR;
PAPPPQSQSPEVEQLGR	PAPPPQS[79.9663]QSPEVEQLGR	K	V	909	925	17	3	7S(79.9663)	sp|P52948-2|NUP98_HUMAN	P52948-2	NUP98_HUMAN	NUP98	Isoform 2 of Nuclear pore complex protein Nup98-Nup96		sp|P52948-5|NUP98_HUMAN, sp|P52948-6|NUP98_HUMAN, sp|P52948|NUP98_HUMAN	2	3.17605e+06	MS/MS	STY:79.9663@PAPPPQS(0.5000)QS(0.5000)PEVEQLGR;
PAQLGTQRSQEADVQDWEFR	PAQLGT[79.9663]QRSQEADVQDWEFR	K	K	828	847	20	3	6T(79.9663)	sp|Q9C0C2|TB182_HUMAN	Q9C0C2	TB182_HUMAN	TNKS1BP1	182 kDa tankyrase-1-binding protein		sp|Q9C0C2-2|TB182_HUMAN	4	6175754	MS/MS	STY:79.9663@PAQLGT(0.8920)QRS(0.1080)QEADVQDWEFR;
PATPAEDDEDDDIDLFGSDNEEEDK	PATPAEDDEDDDIDLFGS[79.9663]DNEEEDK	K	E	145	169	25	3	18S(79.9663)	sp|P29692|EF1D_HUMAN	P29692	EF1D_HUMAN	EEF1D	Elongation factor 1-delta		sp|P29692-2|EF1D_HUMAN, sp|P29692-3|EF1D_HUMAN, sp|P29692-4|EF1D_HUMAN	2	7912255	MS/MS	STY:79.9663@PAT(0.1407)PAEDDEDDDIDLFGS(0.8593)DNEEEDK;
PCSEETPAISPSK	PC[57.0215]SEETPAISPS[79.9663]K	M	R	2	14	13	2	12S(79.9663),2C(57.0215)	sp|P33316-2|DUT_HUMAN	P33316-2	DUT_HUMAN	DUT	Isoform 2 of Deoxyuridine 5'-triphosphate nucleotidohydrolase, mitochondrial			1	1.1244762E7	MS/MS	STY:79.9663@PCS(0.0212)EET(0.0229)PAIS(0.0229)PS(0.9331)K;
PCSEETPAISPSK	PC[57.0215]SEETPAIS[79.9663]PSK	M	R	2	14	13	2	10S(79.9663),2C(57.0215)	sp|P33316-2|DUT_HUMAN	P33316-2	DUT_HUMAN	DUT	Isoform 2 of Deoxyuridine 5'-triphosphate nucleotidohydrolase, mitochondrial			4	1.1244762E7	MS/MS	STY:79.9663@PCS(0.0176)EET(0.0176)PAIS(0.4824)PS(0.4824)K;
PCSEETPAISPSKR	PC[57.0215]SEETPAIS[79.9663]PSKR	M	A	2	15	14	2,3	10S(79.9663),2C(57.0215)	sp|P33316-2|DUT_HUMAN	P33316-2	DUT_HUMAN	DUT	Isoform 2 of Deoxyuridine 5'-triphosphate nucleotidohydrolase, mitochondrial			6	2.1873406E7	MS/MS	STY:79.9663@PCS(0.0137)EET(0.0139)PAIS(0.4862)PS(0.4862)KR;
PCSEETPAISPSK	PC[57.0215]S[79.9663]EETPAISPSK	M	R	2	14	13	2	2C(57.0215),3S(79.9663)	sp|P33316-2|DUT_HUMAN	P33316-2	DUT_HUMAN	DUT	Isoform 2 of Deoxyuridine 5'-triphosphate nucleotidohydrolase, mitochondrial			1	1.1244762E7	MS/MS	STY:79.9663@PCS(0.4788)EET(0.4788)PAIS(0.0285)PS(0.0139)K;
PCSEETPAISPSKR	PC[57.0215]S[79.9663]EETPAISPSKR	M	A	2	15	14	2,3	2C(57.0215),3S(79.9663)	sp|P33316-2|DUT_HUMAN	P33316-2	DUT_HUMAN	DUT	Isoform 2 of Deoxyuridine 5'-triphosphate nucleotidohydrolase, mitochondrial			2	2.148982E7	MS/MS	STY:79.9663@PCS(0.2500)EET(0.2500)PAIS(0.2500)PS(0.2500)KR;
PFSAPKPQTSPSPK	PFSAPKPQTSPS[79.9663]PK	K	R	298	311	14	2	12S(79.9663)	sp|Q01518-2|CAP1_HUMAN	Q01518-2	CAP1_HUMAN	CAP1	Isoform 2 of Adenylyl cyclase-associated protein 1		sp|Q01518|CAP1_HUMAN	1	1.3285395E7	MS/MS	STY:79.9663@PFS(0.0736)APKPQT(0.0736)S(0.0736)PS(0.7793)PK;
PFSAPKPQTSPSPK	PFSAPKPQTS[79.9663]PSPK	K	R	298	311	14	2	10S(79.9663)	sp|Q01518-2|CAP1_HUMAN	Q01518-2	CAP1_HUMAN	CAP1	Isoform 2 of Adenylyl cyclase-associated protein 1		sp|Q01518|CAP1_HUMAN	1	1.3285395E7	MS/MS	STY:79.9663@PFS(0.0240)APKPQT(0.0277)S(0.9270)PS(0.0213)PK;
PFSAPKPQTSPSPK	PFSAPKPQTS[79.9663]PS[79.9663]PK	K	R	298	311	14	2	10S(79.9663),12S(79.9663)	sp|Q01518-2|CAP1_HUMAN	Q01518-2	CAP1_HUMAN	CAP1	Isoform 2 of Adenylyl cyclase-associated protein 1		sp|Q01518|CAP1_HUMAN	1	1.0691172E7	MS/MS	STY:79.9663@PFS(0.1059)APKPQT(0.4823)S(0.7031)PS(0.7087)PK;
PFSAPKPQTSPSPK	PFSAPKPQT[79.9663]SPSPK	K	R	298	311	14	3	9T(79.9663)	sp|Q01518-2|CAP1_HUMAN	Q01518-2	CAP1_HUMAN	CAP1	Isoform 2 of Adenylyl cyclase-associated protein 1		sp|Q01518|CAP1_HUMAN	1	6.5994e+06	MS/MS	STY:79.9663@PFS(0.0297)APKPQT(0.3234)S(0.3234)PS(0.3234)PK;
PFSAPKPQTSPSPK	PFSAPKPQT[79.9663]S[79.9663]PSPK	K	R	298	311	14	2	10S(79.9663),9T(79.9663)	sp|Q01518-2|CAP1_HUMAN	Q01518-2	CAP1_HUMAN	CAP1	Isoform 2 of Adenylyl cyclase-associated protein 1		sp|Q01518|CAP1_HUMAN	1	1.0691172E7	MS/MS	STY:79.9663@PFS(0.0633)APKPQT(0.6456)S(0.6456)PS(0.6456)PK;
PFSAPKPQTSPSPK	PFS[79.9663]APKPQTSPSPK	K	R	298	311	14	2	3S(79.9663)	sp|Q01518-2|CAP1_HUMAN	Q01518-2	CAP1_HUMAN	CAP1	Isoform 2 of Adenylyl cyclase-associated protein 1		sp|Q01518|CAP1_HUMAN	2	1.3285395E7	MS/MS	STY:79.9663@PFS(0.3275)APKPQT(0.3275)S(0.3275)PS(0.0174)PK;
PGEEPSEYTDEEDTK	PGEEPSEYT[79.9663]DEEDTK	K	D	227	241	15	2	9T(79.9663)	sp|O15173-2|PGRC2_HUMAN	O15173-2	PGRC2_HUMAN	PGRMC2	Isoform 2 of Membrane-associated progesterone receptor component 2		sp|O15173|PGRC2_HUMAN	1	1.0025798E7	MS/MS	STY:79.9663@PGEEPS(0.0272)EY(0.0272)T(0.4728)DEEDT(0.4728)K;
PGEEPSEYTDEEDTK	PGEEPSEY[79.9663]TDEEDTK	K	D	227	241	15	2	8Y(79.9663)	sp|O15173-2|PGRC2_HUMAN	O15173-2	PGRC2_HUMAN	PGRMC2	Isoform 2 of Membrane-associated progesterone receptor component 2		sp|O15173|PGRC2_HUMAN	1	1.0025798E7	MS/MS	STY:79.9663@PGEEPS(0.0550)EY(0.3150)T(0.3150)DEEDT(0.3150)K;
PGEEPSEYTDEEDTK	PGEEPS[79.9663]EYTDEEDTK	K	D	227	241	15	2	6S(79.9663)	sp|O15173-2|PGRC2_HUMAN	O15173-2	PGRC2_HUMAN	PGRMC2	Isoform 2 of Membrane-associated progesterone receptor component 2		sp|O15173|PGRC2_HUMAN	3	1.0025798E7	MS/MS	STY:79.9663@PGEEPS(0.3300)EY(0.3300)T(0.3300)DEEDT(0.0101)K;
PGNPPPGHPGGQSSSGTSQHPPSLSPKPPTR	PGNPPPGHPGGQSSSGTSQHPPSLS[79.9663]PKPPTR	K	S	370	400	31	4	25S(79.9663)	sp|Q68EM7-3|RHG17_HUMAN	Q68EM7-3	RHG17_HUMAN	ARHGAP17	Isoform 3 of Rho GTPase-activating protein 17		sp|Q68EM7-2|RHG17_HUMAN, sp|Q68EM7-5|RHG17_HUMAN, sp|Q68EM7-6|RHG17_HUMAN, sp|Q68EM7-7|RHG17_HUMAN, sp|Q68EM7|RHG17_HUMAN	1	2.52278e+06	MS/MS	STY:79.9663@PGNPPPGHPGGQS(0.0108)S(0.0108)S(0.0108)GT(0.0108)S(0.0108)QHPPS(0.0113)LS(0.4674)PKPPT(0.4674)R;
PGPAEAPSPTASPSGDASPPATAPYDPR	PGPAEAPSPTASPSGDAS[79.9663]PPATAPYDPR	K	V	1097	1124	28	3	18S(79.9663)	sp|Q9UPT8|ZC3H4_HUMAN	Q9UPT8	ZC3H4_HUMAN	ZC3H4	Zinc finger CCCH domain-containing protein 4			2	6565367	MS/MS	STY:79.9663@PGPAEAPS(0.0865)PT(0.0865)AS(0.0484)PS(0.0484)GDAS(0.6983)PPAT(0.0191)APY(0.0128)DPR;
PGPAEAPSPTASPSGDASPPATAPYDPR	PGPAEAPSPTASPS[79.9663]GDASPPATAPYDPR	K	V	1097	1124	28	3	14S(79.9663)	sp|Q9UPT8|ZC3H4_HUMAN	Q9UPT8	ZC3H4_HUMAN	ZC3H4	Zinc finger CCCH domain-containing protein 4			2	6569369	MS/MS	STY:79.9663@PGPAEAPS(0.0681)PT(0.0681)AS(0.0681)PS(0.6870)GDAS(0.0362)PPAT(0.0362)APY(0.0362)DPR;
PGPAEAPSPTASPSGDASPPATAPYDPR	PGPAEAPS[79.9663]PTASPS[79.9663]GDASPPATAPYDPR	K	V	1097	1124	28	3	14S(79.9663),8S(79.9663)	sp|Q9UPT8|ZC3H4_HUMAN	Q9UPT8	ZC3H4_HUMAN	ZC3H4	Zinc finger CCCH domain-containing protein 4			1	3.38451e+06	MS/MS	STY:79.9663@PGPAEAPS(0.4091)PT(0.1119)AS(0.1119)PS(0.3418)GDAS(0.3418)PPAT(0.3418)APY(0.3418)DPR;
PGPAEAPSPTASPSGDASPPATAPYDPR	PGPAEAPS[79.9663]PT[79.9663]ASPSGDASPPATAPYDPR	K	V	1097	1124	28	3	10T(79.9663),8S(79.9663)	sp|Q9UPT8|ZC3H4_HUMAN	Q9UPT8	ZC3H4_HUMAN	ZC3H4	Zinc finger CCCH domain-containing protein 4			4	6750805	MS/MS	STY:79.9663@PGPAEAPS(0.3909)PT(0.3909)AS(0.3909)PS(0.3909)GDAS(0.3909)PPAT(0.0227)APY(0.0227)DPR;
PGPNIESGNEDDDASFK	PGPNIES[79.9663]GNEDDDASFK	K	I	208	224	17	2	7S(79.9663)	sp|O60841|IF2P_HUMAN	O60841	IF2P_HUMAN	EIF5B	Eukaryotic translation initiation factor 5B			1	0	MS/MS	STY:79.9663@PGPNIES(0.5000)GNEDDDAS(0.5000)FK;
PGPTPSGTNVGSSGRSPSK	PGPTPSGTNVGSS[79.9663]GRSPSK	M	A	2	20	19	2	13S(79.9663)	sp|P60468|SC61B_HUMAN	P60468	SC61B_HUMAN	SEC61B	Protein transport protein Sec61 subunit beta			2	1.1887389E7	MS/MS	STY:79.9663@PGPT(0.0060)PS(0.0064)GT(0.0064)NVGS(0.0084)S(0.3242)GRS(0.3242)PS(0.3242)K;
PGPTPSGTNVGSSGRSPSK	PGPTPSGTNVGS[79.9663]SGRSPSK	M	A	2	20	19	3	12S(79.9663)	sp|P60468|SC61B_HUMAN	P60468	SC61B_HUMAN	SEC61B	Protein transport protein Sec61 subunit beta			1	1.2115718E7	MS/MS	STY:79.9663@PGPT(0.0078)PS(0.0082)GT(0.0082)NVGS(0.4614)S(0.4614)GRS(0.0265)PS(0.0265)K;
PGPTPSGTNVGSSGRSPSK	PGPT[79.9663]PSGTNVGSSGRSPSK	M	A	2	20	19	2,3	4T(79.9663)	sp|P60468|SC61B_HUMAN	P60468	SC61B_HUMAN	SEC61B	Protein transport protein Sec61 subunit beta			3	2.4289592E7	MS/MS	STY:79.9663@PGPT(0.8238)PS(0.0252)GT(0.0302)NVGS(0.0302)S(0.0302)GRS(0.0302)PS(0.0302)K;
PGSIDSNNQLFAPGGRLSWGK	PGSIDSNNQLFAPGGRLS[79.9663]WGK	K	G	1035	1055	21	3	18S(79.9663)	sp|Q04637-3|IF4G1_HUMAN	Q04637-3	IF4G1_HUMAN	EIF4G1	Isoform B of Eukaryotic translation initiation factor 4 gamma 1		sp|Q04637-4|IF4G1_HUMAN, sp|Q04637-5|IF4G1_HUMAN, sp|Q04637-6|IF4G1_HUMAN, sp|Q04637-7|IF4G1_HUMAN, sp|Q04637-8|IF4G1_HUMAN, sp|Q04637-9|IF4G1_HUMAN, sp|Q04637|IF4G1_HUMAN	1	1.24348e+06	MS/MS	STY:79.9663@PGS(0.2275)IDS(0.2275)NNQLFAPGGRLS(0.5449)WGK;
PGVGAGHGGDPKLSPHK	PGVGAGHGGDPKLS[79.9663]PHK	K	V	16	32	17	3	14S(79.9663)	sp|Q9GZP8-2|IMUP_HUMAN	Q9GZP8-2	IMUP_HUMAN	IMUP	Isoform 2 of Immortalization up-regulated protein		sp|Q9GZP8|IMUP_HUMAN	1	4367052	MS/MS	STY:79.9663@PGVGAGHGGDPKLS(1.0000)PHK;
PIGPDDAIDALSSDFTCGSPTAAGK	PIGPDDAIDALSSDFTC[57.0215]GS[79.9663]PTAAGK	K	K	286	310	25	3	17C(57.0215),19S(79.9663)	sp|P20810-10|ICAL_HUMAN	P20810-10	ICAL_HUMAN	CAST	Isoform 10 of Calpastatin		sp|P20810-2|ICAL_HUMAN, sp|P20810-3|ICAL_HUMAN, sp|P20810-4|ICAL_HUMAN, sp|P20810-5|ICAL_HUMAN, sp|P20810-6|ICAL_HUMAN, sp|P20810-7|ICAL_HUMAN, sp|P20810-8|ICAL_HUMAN, sp|P20810-9|ICAL_HUMAN, sp|P20810|ICAL_HUMAN	1	0	MS/MS	STY:79.9663@PIGPDDAIDALS(0.0237)S(0.0237)DFT(0.0121)CGS(0.4703)PT(0.4703)AAGK;
PIGPDDAIDALSSDFTCGSPTAAGK	PIGPDDAIDALSSDFT[79.9663]C[57.0215]GSPTAAGK	K	K	286	310	25	3	16T(79.9663),17C(57.0215)	sp|P20810-10|ICAL_HUMAN	P20810-10	ICAL_HUMAN	CAST	Isoform 10 of Calpastatin		sp|P20810-2|ICAL_HUMAN, sp|P20810-3|ICAL_HUMAN, sp|P20810-4|ICAL_HUMAN, sp|P20810-5|ICAL_HUMAN, sp|P20810-6|ICAL_HUMAN, sp|P20810-7|ICAL_HUMAN, sp|P20810-8|ICAL_HUMAN, sp|P20810-9|ICAL_HUMAN, sp|P20810|ICAL_HUMAN	2	0	MS/MS	STY:79.9663@PIGPDDAIDALS(0.3263)S(0.3263)DFT(0.3307)CGS(0.0087)PT(0.0081)AAGK;
PIRPGQHPAASPTHPSAIR	PIRPGQHPAAS[79.9663]PTHPSAIR	K	G	923	941	19	4	11S(79.9663)	sp|P33176|KINH_HUMAN	P33176	KINH_HUMAN	KIF5B	Kinesin-1 heavy chain			1	2663962	MS/MS	STY:79.9663@PIRPGQHPAAS(0.3333)PT(0.3333)HPS(0.3333)AIR;
PKIEDVGSDEEDDSGK	PKIEDVGSDEEDDS[79.9663]GK	K	D	248	263	16	2	14S(79.9663)	sp|P08238|HS90B_HUMAN	P08238	HS90B_HUMAN	HSP90AB1	Heat shock protein HSP 90-beta	HSP90AB2P	sp|Q58FF8|H90B2_HUMAN	1	9.5239264E7	MS/MS	STY:79.9663@PKIEDVGS(0.1800)DEEDDS(0.8200)GK;
PKIEDVGSDEEDDSGK	PKIEDVGS[79.9663]DEEDDSGK	K	D	248	263	16	2	8S(79.9663)	sp|P08238|HS90B_HUMAN	P08238	HS90B_HUMAN	HSP90AB1	Heat shock protein HSP 90-beta	HSP90AB2P	sp|Q58FF8|H90B2_HUMAN	8	9.5491272E7	MS/MS	STY:79.9663@PKIEDVGS(0.9382)DEEDDS(0.0618)GK;
PKSPEPEATLTFPFLDK	PKS[79.9663]PEPEATLTFPFLDK	K	M	716	732	17	2,3	3S(79.9663)	sp|Q9UPQ0-10|LIMC1_HUMAN	Q9UPQ0-10	LIMC1_HUMAN	LIMCH1	Isoform 10 of LIM and calponin homology domains-containing protein 1		sp|Q9UPQ0-2|LIMC1_HUMAN, sp|Q9UPQ0-3|LIMC1_HUMAN, sp|Q9UPQ0-4|LIMC1_HUMAN, sp|Q9UPQ0-5|LIMC1_HUMAN, sp|Q9UPQ0-6|LIMC1_HUMAN, sp|Q9UPQ0-8|LIMC1_HUMAN, sp|Q9UPQ0-9|LIMC1_HUMAN, sp|Q9UPQ0|LIMC1_HUMAN	3	4.45072e+06	MS/MS	STY:79.9663@PKS(0.8365)PEPEAT(0.1155)LT(0.0480)FPFLDK;
PKVEMYSGSDDDDDFNK	PKVEMY[79.9663]S[79.9663]GSDDDDDFNK	K	L	129	145	17	2	6Y(79.9663),7S(79.9663)	sp|O60841|IF2P_HUMAN	O60841	IF2P_HUMAN	EIF5B	Eukaryotic translation initiation factor 5B			1	0	MS/MS	STY:79.9663@PKVEMY(0.6667)S(0.6667)GS(0.6667)DDDDDFNK;
PLAGTDDSVVSEDRLNETELTDLEGQQESPPK	PLAGTDDSVVSEDRLNET[79.9663]ELTDLEGQQESPPK	K	N	113	144	32	3	18T(79.9663)	sp|Q9ULF5-2|S39AA_HUMAN	Q9ULF5-2	S39AA_HUMAN	SLC39A10	Isoform 2 of Zinc transporter ZIP10		sp|Q9ULF5|S39AA_HUMAN	1	8651771	MS/MS	STY:79.9663@PLAGT(0.1200)DDS(0.1649)VVS(0.0377)EDRLNET(0.3338)ELT(0.3338)DLEGQQES(0.0098)PPK;
PLSPDSR	PLS[79.9663]PDSR	K	A	200	206	7	2	3S(79.9663)	sp|Q9UHB6-2|LIMA1_HUMAN	Q9UHB6-2	LIMA1_HUMAN	LIMA1	Isoform Alpha of LIM domain and actin-binding protein 1		sp|Q9UHB6-3|LIMA1_HUMAN, sp|Q9UHB6-4|LIMA1_HUMAN, sp|Q9UHB6-5|LIMA1_HUMAN, sp|Q9UHB6|LIMA1_HUMAN	1	3076109	MS/MS	STY:79.9663@PLS(0.7306)PDS(0.2694)R;
PNSQGPPNPMALPSEHGLEQPSHTPPQTPTPPSTPPLGK	PNSQGPPNPMALPSEHGLEQPS[79.9663]HT[79.9663]PPQTPTPPSTPPLGK	K	Q	457	495	39	4	22S(79.9663),24T(79.9663)	sp|Q68EM7-3|RHG17_HUMAN	Q68EM7-3	RHG17_HUMAN	ARHGAP17	Isoform 3 of Rho GTPase-activating protein 17		sp|Q68EM7-2|RHG17_HUMAN, sp|Q68EM7-5|RHG17_HUMAN, sp|Q68EM7-6|RHG17_HUMAN, sp|Q68EM7-7|RHG17_HUMAN, sp|Q68EM7|RHG17_HUMAN	1	6045665	MS/MS	STY:79.9663@PNS(0.1378)QGPPNPMALPS(0.0545)EHGLEQPS(0.3013)HT(0.3013)PPQT(0.3013)PT(0.3013)PPS(0.3013)T(0.3013)PPLGK;
PQQAAGMLSPK	PQQAAGMLS[79.9663]PK	K	T	1211	1221	11	2	9S(79.9663)	sp|Q13428-6|TCOF_HUMAN	Q13428-6	TCOF_HUMAN	TCOF1	Isoform 6 of Treacle protein		sp|Q13428-2|TCOF_HUMAN, sp|Q13428-3|TCOF_HUMAN, sp|Q13428-4|TCOF_HUMAN, sp|Q13428-7|TCOF_HUMAN, sp|Q13428-8|TCOF_HUMAN, sp|Q13428|TCOF_HUMAN	1	1.36291e+06	MS/MS	STY:79.9663@PQQAAGMLS(1.0000)PK;
PQSMFEPPQVSSPVQEK	PQS[79.9663]MFEPPQVSSPVQEK	K	R	851	867	17	2,3	3S(79.9663)	sp|Q9Y2D5-4|AKAP2_HUMAN	Q9Y2D5-4	AKAP2_HUMAN	AKAP2	Isoform 3 of A-kinase anchor protein 2		sp|Q9Y2D5-5|AKAP2_HUMAN, sp|Q9Y2D5-6|AKAP2_HUMAN, sp|Q9Y2D5-7|AKAP2_HUMAN, sp|Q9Y2D5|AKAP2_HUMAN	2	4.07205e+06	MS/MS	STY:79.9663@PQS(0.5743)MFEPPQVS(0.2128)S(0.2128)PVQEK;
[truncated: 1,067 more rows]

## Sheet: 1000cells_2_MSFragger
Peptide Sequence	Modified Sequence	Prev AA	Next AA	Start	End	Peptide Length	Charges	Assigned Modifications	Protein	Protein ID	Entry Name	Gene	Protein Description	Mapped Genes	Mapped Proteins	cell_3 Spectral Count	cell_3 Intensity	cell_3 Match Type	cell_3 Localization
[truncated: 2,356 more rows]

[truncated: 6 more sheets: 1000cells_3_MSFragger, 1000cells_1_PD, 1000cells_2_PD, 1000cells_3_PD, phosphoprotein, phosphosite]
