# Supplementary material for: Unlocking Ultrasensitive Phosphoproteomics of Nanoscale Samples: A Rapid IMAC Enrichment Platform Using Ti-PAN Tip
Source: Research Square preprint supplement (doi:10.21203/rs.3.rs-8623740/v1), 2026-01-28
Supplement: Supplementary file 7 [file 77cb77652d132fa95c24cfbc.xlsx]

## Sheet: Fe-NTA_1_MSFragger
Peptide Sequence	Modified Sequence	Prev AA	Next AA	Start	End	Peptide Length	Charges	Assigned Modifications	Protein	Protein ID	Entry Name	Gene	Protein Description	Mapped Genes	Mapped Proteins	FeNTA_1 Spectral Count	FeNTA_1 Intensity	FeNTA_1 Match Type	FeNTA_1 Localization
AAAAAATAPPSPGPAQPGPR	AAAAAATAPPS[79.9663]PGPAQPGPR	R	A	151	170	20	2	11S(79.9663)	sp|Q6SPF0|SAMD1_HUMAN	Q6SPF0	SAMD1_HUMAN	SAMD1	Sterile alpha motif domain-containing protein 1			3	1.02939e+06	MS/MS	STY:79.9663@AAAAAAT(0.0611)APPS(0.9389)PGPAQPGPR;
AAAAAPASEDEDDEDDEDDEDDDDDEEDDSEEEAMETTPAK	AAAAAPASEDEDDEDDEDDEDDDDDEEDDSEEEAMETT[79.9663]PAK	K	G	177	217	41	4	38T(79.9663)	sp|P19338|NUCL_HUMAN	P19338	NUCL_HUMAN	NCL	Nucleolin			1	0	MS/MS	STY:79.9663@AAAAAPAS(0.0570)EDEDDEDDEDDEDDDDDEEDDS(0.0351)EEEAMET(0.0351)T(0.8727)PAK;
AAAAAPASEDEDDEDDEDDEDDDDDEEDDSEEEAMETTPAK	AAAAAPASEDEDDEDDEDDEDDDDDEEDDSEEEAMET[79.9663]T[79.9663]PAK	K	G	177	217	41	4	37T(79.9663),38T(79.9663)	sp|P19338|NUCL_HUMAN	P19338	NUCL_HUMAN	NCL	Nucleolin			1	1.1128718E7	MS/MS	STY:79.9663@AAAAAPAS(0.4012)EDEDDEDDEDDEDDDDDEEDDS(0.4012)EEEAMET(0.5988)T(0.5988)PAK;
AAAAAPASEDEDDEDDEDDEDDDDDEEDDSEEEAMETTPAK	AAAAAPASEDEDDEDDEDDEDDDDDEEDDS[79.9663]EEEAMET[79.9663]TPAK	K	G	177	217	41	4	30S(79.9663),37T(79.9663)	sp|P19338|NUCL_HUMAN	P19338	NUCL_HUMAN	NCL	Nucleolin			1	1.1128718E7	MS/MS	STY:79.9663@AAAAAPAS(0.3090)EDEDDEDDEDDEDDDDDEEDDS(0.5918)EEEAMET(0.5496)T(0.5496)PAK;
AAAAAPASEDEDDEDDEDDEDDDDDEEDDSEEEAMETTPAK	AAAAAPASEDEDDEDDEDDEDDDDDEEDDS[79.9663]EEEAM[15.9949]ET[79.9663]TPAK	K	G	177	217	41	4	30S(79.9663),35M(15.9949),37T(79.9663)	sp|P19338|NUCL_HUMAN	P19338	NUCL_HUMAN	NCL	Nucleolin			1	0	MS/MS	STY:79.9663@AAAAAPAS(0.2667)EDEDDEDDEDDEDDDDDEEDDS(0.5860)EEEAMET(0.5737)T(0.5737)PAK;M:15.9949@AAAAAPASEDEDDEDDEDDEDDDDDEEDDSEEEAM(1.0000)ETTPAK;
AAAAAPASEDEDDEDDEDDEDDDDDEEDDSEEEAMETTPAK	AAAAAPAS[79.9663]EDEDDEDDEDDEDDDDDEEDDSEEEAMET[79.9663]TPAK	K	G	177	217	41	4	37T(79.9663),8S(79.9663)	sp|P19338|NUCL_HUMAN	P19338	NUCL_HUMAN	NCL	Nucleolin			1	1.1128718E7	MS/MS	STY:79.9663@AAAAAPAS(0.5592)EDEDDEDDEDDEDDDDDEEDDS(0.3882)EEEAMET(0.5263)T(0.5263)PAK;
AAAAAPASEDEDDEDDEDDEDDDDDEEDDSEEEAMETTPAK	AAAAAPAS[79.9663]EDEDDEDDEDDEDDDDDEEDDSEEEAM[15.9949]ETTPAK	K	G	177	217	41	4	35M(15.9949),8S(79.9663)	sp|P19338|NUCL_HUMAN	P19338	NUCL_HUMAN	NCL	Nucleolin			1	0	MS/MS	STY:79.9663@AAAAAPAS(0.6246)EDEDDEDDEDDEDDDDDEEDDS(0.1823)EEEAMET(0.1039)T(0.0892)PAK;M:15.9949@AAAAAPASEDEDDEDDEDDEDDDDDEEDDSEEEAM(1.0000)ETTPAK;
AAAAAPASEDEDDEDDEDDEDDDDDEEDDSEEEAMETTPAK	AAAAAPAS[79.9663]EDEDDEDDEDDEDDDDDEEDDS[79.9663]EEEAMETTPAK	K	G	177	217	41	4	30S(79.9663),8S(79.9663)	sp|P19338|NUCL_HUMAN	P19338	NUCL_HUMAN	NCL	Nucleolin			2	1.1128718E7	MS/MS	STY:79.9663@AAAAAPAS(0.7217)EDEDDEDDEDDEDDDDDEEDDS(0.7217)EEEAMET(0.2783)T(0.2783)PAK;
AAAAAPASEDEDDEDDEDDEDDDDDEEDDSEEEAMETTPAK	AAAAAPAS[79.9663]EDEDDEDDEDDEDDDDDEEDDS[79.9663]EEEAM[15.9949]ETTPAK	K	G	177	217	41	4	30S(79.9663),35M(15.9949),8S(79.9663)	sp|P19338|NUCL_HUMAN	P19338	NUCL_HUMAN	NCL	Nucleolin			1	0	MS/MS	STY:79.9663@AAAAAPAS(0.7639)EDEDDEDDEDDEDDDDDEEDDS(0.7653)EEEAMET(0.2354)T(0.2354)PAK;M:15.9949@AAAAAPASEDEDDEDDEDDEDDDDDEEDDSEEEAM(1.0000)ETTPAK;
AAALQALQAQAPTSPPPPPPPLK	AAALQALQAQAPTS[79.9663]PPPPPPPLK	R	A	470	492	23	3	14S(79.9663)	sp|Q8NAF0|ZN579_HUMAN	Q8NAF0	ZN579_HUMAN	ZNF579	Zinc finger protein 579			1	848725	MS/MS	STY:79.9663@AAALQALQAQAPT(0.1571)S(0.8429)PPPPPPPLK;
AAALQALQAQAPTSPPPPPPPLK	AAALQALQAQAPT[79.9663]SPPPPPPPLK	R	A	470	492	23	3	13T(79.9663)	sp|Q8NAF0|ZN579_HUMAN	Q8NAF0	ZN579_HUMAN	ZNF579	Zinc finger protein 579			2	848725	MS/MS	STY:79.9663@AAALQALQAQAPT(0.5000)S(0.5000)PPPPPPPLK;
AAATPESQEPQAK	AAAT[79.9663]PESQEPQAK	K	G	145	157	13	2	4T(79.9663)	sp|P49006|MRP_HUMAN	P49006	MRP_HUMAN	MARCKSL1	MARCKS-related protein			1	0	MS/MS	STY:79.9663@AAAT(0.9382)PES(0.0618)QEPQAK;
AAAYDISEDEED	AAAY[79.9663]DISEDEED	K	-	356	367	12	2	4Y(79.9663)	sp|P49585|PCY1A_HUMAN	P49585	PCY1A_HUMAN	PCYT1A	Choline-phosphate cytidylyltransferase A			2	4.78496e+06	MS/MS	STY:79.9663@AAAY(0.7821)DIS(0.2179)EDEED;
AADPPAENSSAPEAEQGGAE	AADPPAENSS[79.9663]APEAEQGGAE	K	-	305	324	20	2	10S(79.9663)	sp|P67809|YBOX1_HUMAN	P67809	YBOX1_HUMAN	YBX1	Y-box-binding protein 1			1	4936081	MS/MS	STY:79.9663@AADPPAENS(0.0581)S(0.9419)APEAEQGGAE;
AADPPAENSSAPEAEQGGAE	AADPPAENS[79.9663]SAPEAEQGGAE	K	-	305	324	20	2	9S(79.9663)	sp|P67809|YBOX1_HUMAN	P67809	YBOX1_HUMAN	YBX1	Y-box-binding protein 1			6	4936081	MS/MS	STY:79.9663@AADPPAENS(0.9382)S(0.0618)APEAEQGGAE;
AADSDDGAVSAPAASDGGVSK	AADSDDGAVSAPAAS[79.9663]DGGVSK	M	S	2	22	21	2	15S(79.9663)	sp|Q96GM8|TOE1_HUMAN	Q96GM8	TOE1_HUMAN	TOE1	Target of EGR1 protein 1			1	4512699	MS/MS	STY:79.9663@AADS(0.0137)DDGAVS(0.0137)APAAS(0.4863)DGGVS(0.4863)K;
AADSDDGAVSAPAASDGGVSK	AADSDDGAVS[79.9663]APAASDGGVSK	M	S	2	22	21	2,3	10S(79.9663)	sp|Q96GM8|TOE1_HUMAN	Q96GM8	TOE1_HUMAN	TOE1	Target of EGR1 protein 1			2	4512699	MS/MS	STY:79.9663@AADS(0.0265)DDGAVS(0.6162)APAAS(0.0151)DGGVS(0.3421)K;
AADSDDGAVSAPAASDGGVSK	AADS[79.9663]DDGAVSAPAASDGGVSK	M	S	2	22	21	2,3	4S(79.9663)	sp|Q96GM8|TOE1_HUMAN	Q96GM8	TOE1_HUMAN	TOE1	Target of EGR1 protein 1			3	4512699	MS/MS	STY:79.9663@AADS(0.9445)DDGAVS(0.0186)APAAS(0.0185)DGGVS(0.0185)K;
AADTEEMDIEMDSGDEA	AADTEEMDIEMDS[79.9663]GDEA	R	-	395	411	17	2	13S(79.9663)	sp|Q9UBB5|MBD2_HUMAN	Q9UBB5	MBD2_HUMAN	MBD2	Methyl-CpG-binding domain protein 2			2	3.67063e+06	MS/MS	STY:79.9663@AADT(0.0538)EEMDIEMDS(0.9462)GDEA;
AADTEEMDIEMDSGDEA	AADT[79.9663]EEMDIEMDSGDEA	R	-	395	411	17	2	4T(79.9663)	sp|Q9UBB5|MBD2_HUMAN	Q9UBB5	MBD2_HUMAN	MBD2	Methyl-CpG-binding domain protein 2			1	3.67063e+06	MS/MS	STY:79.9663@AADT(0.5000)EEMDIEMDS(0.5000)GDEA;
AADTEEMDIEMDSGDEA	AADT[79.9663]EEM[15.9949]DIEMDSGDEA	R	-	395	411	17	2	4T(79.9663),7M(15.9949)	sp|Q9UBB5|MBD2_HUMAN	Q9UBB5	MBD2_HUMAN	MBD2	Methyl-CpG-binding domain protein 2			1	0	MS/MS	STY:79.9663@AADT(0.5000)EEMDIEMDS(0.5000)GDEA;M:15.9949@AADTEEM(0.5000)DIEM(0.5000)DSGDEA;
AAEAGGAEEQYGFLTTPTK	AAEAGGAEEQYGFLTT[79.9663]PTK	K	Q	1052	1070	19	2	16T(79.9663)	sp|P46821|MAP1B_HUMAN	P46821	MAP1B_HUMAN	MAP1B	Microtubule-associated protein 1B			1	1.74641e+06	MS/MS	STY:79.9663@AAEAGGAEEQY(0.0127)GFLT(0.0495)T(0.4689)PT(0.4689)K;
AAEAGGAEEQYGFLTTPTK	AAEAGGAEEQY[79.9663]GFLTTPTK	K	Q	1052	1070	19	2	11Y(79.9663)	sp|P46821|MAP1B_HUMAN	P46821	MAP1B_HUMAN	MAP1B	Microtubule-associated protein 1B			3	1.74641e+06	MS/MS	STY:79.9663@AAEAGGAEEQY(0.8967)GFLT(0.0344)T(0.0344)PT(0.0344)K;
AAEEQGDDQDSEK	AAEEQGDDQDS[79.9663]EK	K	S	175	187	13	2	11S(79.9663)	sp|Q1KMD3|HNRL2_HUMAN	Q1KMD3	HNRL2_HUMAN	HNRNPUL2	Heterogeneous nuclear ribonucleoprotein U-like protein 2			6	2.41445e+06	MS/MS	STY:79.9663@AAEEQGDDQDS(1.0000)EK;
AAESETPGKSPEK	AAESETPGKS[79.9663]PEK	K	K	418	430	13	2	10S(79.9663)	sp|O76021|RL1D1_HUMAN	O76021	RL1D1_HUMAN	RSL1D1	Ribosomal L1 domain-containing protein 1			2	697574	MS/MS	STY:79.9663@AAES(0.0352)ET(0.0352)PGKS(0.9297)PEK;
AAESETPGKSPEK	AAES[79.9663]ETPGKSPEK	K	K	418	430	13	2	4S(79.9663)	sp|O76021|RL1D1_HUMAN	O76021	RL1D1_HUMAN	RSL1D1	Ribosomal L1 domain-containing protein 1			7	738436	MS/MS	STY:79.9663@AAES(0.5966)ET(0.2017)PGKS(0.2017)PEK;
AAGDTTVIENSDVSPETESSEK	AAGDTTVIENSDVSPETES[79.9663]SEK	K	E	1300	1321	22	3	19S(79.9663)	sp|Q86UP2|KTN1_HUMAN	Q86UP2	KTN1_HUMAN	KTN1	Kinectin			1	0	MS/MS	STY:79.9663@AAGDT(0.1419)T(0.1419)VIENS(0.0806)DVS(0.1102)PET(0.0122)ES(0.2566)S(0.2566)EK;
AAGDTTVIENSDVSPETESSEK	AAGDTTVIENS[79.9663]DVSPETESSEK	K	E	1300	1321	22	2	11S(79.9663)	sp|Q86UP2|KTN1_HUMAN	Q86UP2	KTN1_HUMAN	KTN1	Kinectin			1	0	MS/MS	STY:79.9663@AAGDT(0.0102)T(0.0102)VIENS(0.9334)DVS(0.0150)PET(0.0110)ES(0.0101)S(0.0101)EK;
AAGGAPSPPPPVR	AAGGAPS[79.9663]PPPPVR	R	R	672	684	13	2	7S(79.9663)	sp|Q4KMP7|TB10B_HUMAN	Q4KMP7	TB10B_HUMAN	TBC1D10B	TBC1 domain family member 10B			14	4398987	MS/MS	STY:79.9663@AAGGAPS(1.0000)PPPPVR;
AAGGATPKK	AAGGAT[79.9663]PKK	K	S	141	149	9	2	6T(79.9663)	sp|P16403|H12_HUMAN	P16403	H12_HUMAN	H1-2	Histone H1.2			5	1.70471e+06	MS/MS	STY:79.9663@AAGGAT(1.0000)PKK;
AAGPASPPEEDPER	AAGPAS[79.9663]PPEEDPER	K	T	404	417	14	2	6S(79.9663)	sp|Q96KM6|Z512B_HUMAN	Q96KM6	Z512B_HUMAN	ZNF512B	Zinc finger protein 512B			1	623236	MS/MS	STY:79.9663@AAGPAS(1.0000)PPEEDPER;
AAKNSEEEEEEK	AAKNS[79.9663]EEEEEEK	K	K	559	570	12	2	5S(79.9663)	sp|Q14978|NOLC1_HUMAN	Q14978	NOLC1_HUMAN	NOLC1	Nucleolar and coiled-body phosphoprotein 1			5	1.46203e+06	MS/MS	STY:79.9663@AAKNS(1.0000)EEEEEEK;
AALAPAKESPR	AALAPAKES[79.9663]PR	R	K	898	908	11	2	9S(79.9663)	sp|Q13428|TCOF_HUMAN	Q13428	TCOF_HUMAN	TCOF1	Treacle protein			2	1.21144e+06	MS/MS	STY:79.9663@AALAPAKES(1.0000)PR;
AALLAQYADVTDEEDEADEK	AALLAQYADVT[79.9663]DEEDEADEK	K	D	129	148	20	2	11T(79.9663)	sp|Q96MW1|CCD43_HUMAN	Q96MW1	CCD43_HUMAN	CCDC43	Coiled-coil domain-containing protein 43			2	1.3330869E7	MS/MS	STY:79.9663@AALLAQY(0.0546)ADVT(0.9454)DEEDEADEK;
AALLAQYADVTDEEDEADEK	AALLAQY[79.9663]ADVTDEEDEADEK	K	D	129	148	20	2,3	7Y(79.9663)	sp|Q96MW1|CCD43_HUMAN	Q96MW1	CCD43_HUMAN	CCDC43	Coiled-coil domain-containing protein 43			5	1.3278174E7	MS/MS	STY:79.9663@AALLAQY(0.9420)ADVT(0.0580)DEEDEADEK;
AAMYDIISSPSK	AAMYDIISSPS[79.9663]K	K	D	342	353	12	2	11S(79.9663)	sp|Q6KC79|NIPBL_HUMAN	Q6KC79	NIPBL_HUMAN	NIPBL	Nipped-B-like protein			1	751482	MS/MS	STY:79.9663@AAMY(0.0212)DIIS(0.0245)S(0.0245)PS(0.9299)K;
AAMYDIISSPSK	AAMY[79.9663]DIISSPSK	K	D	342	353	12	2	4Y(79.9663)	sp|Q6KC79|NIPBL_HUMAN	Q6KC79	NIPBL_HUMAN	NIPBL	Nipped-B-like protein			1	751482	MS/MS	STY:79.9663@AAMY(0.2500)DIIS(0.2500)S(0.2500)PS(0.2500)K;
AAPEASSPPASPLQHLLPGK	AAPEAS[79.9663]SPPASPLQHLLPGK	K	A	686	705	20	3	6S(79.9663)	sp|Q96TA1|NIBA2_HUMAN	Q96TA1	NIBA2_HUMAN	NIBAN2	Protein Niban 2			1	1439020	MS/MS	STY:79.9663@AAPEAS(0.4911)S(0.4911)PPAS(0.0179)PLQHLLPGK;
AAPEASSPPASPLQHLLPGK	AAPEAS[79.9663]SPPAS[79.9663]PLQHLLPGK	K	A	686	705	20	3	11S(79.9663),6S(79.9663)	sp|Q96TA1|NIBA2_HUMAN	Q96TA1	NIBA2_HUMAN	NIBAN2	Protein Niban 2			1	1.47867e+06	MS/MS	STY:79.9663@AAPEAS(0.6575)S(0.6575)PPAS(0.6850)PLQHLLPGK;
AAPPPPALTPDSQTVDSSCK	AAPPPPALT[79.9663]PDSQTVDSSC[57.0215]K	K	T	981	1000	20	3	19C(57.0215),9T(79.9663)	sp|Q9H7N4|SFR19_HUMAN	Q9H7N4	SFR19_HUMAN	SCAF1	Splicing factor, arginine/serine-rich 19			1	780764	MS/MS	STY:79.9663@AAPPPPALT(0.6119)PDS(0.1762)QT(0.1762)VDS(0.0179)S(0.0179)CK;
AAPQSPSVPK	AAPQS[79.9663]PSVPK	K	K	988	997	10	2	5S(79.9663)	sp|O75694|NU155_HUMAN	O75694	NU155_HUMAN	NUP155	Nuclear pore complex protein Nup155			3	2.4671e+06	MS/MS	STY:79.9663@AAPQS(0.5000)PS(0.5000)VPK;
AAPSTAPAEATPPKPGEAEAPPK	AAPSTAPAEAT[79.9663]PPKPGEAEAPPK	R	H	396	418	23	3	11T(79.9663)	sp|O95817|BAG3_HUMAN	O95817	BAG3_HUMAN	BAG3	BAG family molecular chaperone regulator 3			1	1.267e+06	MS/MS	STY:79.9663@AAPS(0.0423)T(0.2221)APAEAT(0.7357)PPKPGEAEAPPK;
AAPSSEGDSCDGVEATEGPGSADTEEPK	AAPS[79.9663]SEGDSC[57.0215]DGVEATEGPGSADTEEPK	R	S	1329	1356	28	3	10C(57.0215),4S(79.9663)	sp|P39880|CUX1_HUMAN	P39880	CUX1_HUMAN	CUX1	Homeobox protein cut-like 1			1	860327	MS/MS	STY:79.9663@AAPS(0.6609)S(0.0199)EGDS(0.0199)CDGVEAT(0.0199)EGPGS(0.1397)ADT(0.1397)EEPK;
AAPSTAPAEATPPKPGEAEAPPK	AAPS[79.9663]TAPAEATPPKPGEAEAPPK	R	H	396	418	23	3	4S(79.9663)	sp|O95817|BAG3_HUMAN	O95817	BAG3_HUMAN	BAG3	BAG family molecular chaperone regulator 3			3	1.267e+06	MS/MS	STY:79.9663@AAPS(0.3333)T(0.3333)APAEAT(0.3333)PPKPGEAEAPPK;
AAPTTPPPPVK	AAPT[79.9663]TPPPPVK	R	R	177	187	11	2	4T(79.9663)	sp|Q9NZQ3|SPN90_HUMAN	Q9NZQ3	SPN90_HUMAN	NCKIPSD	NCK-interacting protein with SH3 domain			4	1303843	MS/MS	STY:79.9663@AAPT(0.9255)T(0.0745)PPPPVK;
AASAPAKESPR	AASAPAKES[79.9663]PR	R	K	438	448	11	2	9S(79.9663)	sp|Q13428|TCOF_HUMAN	Q13428	TCOF_HUMAN	TCOF1	Treacle protein			2	262867	MS/MS	STY:79.9663@AAS(0.0687)APAKES(0.9313)PR;
AASPESASSTPESLQAR	AASPESASS[79.9663]TPESLQAR	R	R	395	411	17	2	9S(79.9663)	sp|Q96BT3|CENPT_HUMAN	Q96BT3	CENPT_HUMAN	CENPT	Centromere protein T			1	0	MS/MS	STY:79.9663@AAS(0.0371)PES(0.0371)AS(0.0371)S(0.2962)T(0.2962)PES(0.2962)LQAR;
AASPPASASDLIEQQQK	AASPPASAS[79.9663]DLIEQQQK	R	R	333	349	17	2	9S(79.9663)	sp|Q5VSL9|STRP1_HUMAN	Q5VSL9	STRP1_HUMAN	STRIP1	Striatin-interacting protein 1			1	2986171	MS/MS	STY:79.9663@AAS(0.0365)PPAS(0.0365)AS(0.9270)DLIEQQQK;
AASPSPQSVR	AASPSPQS[79.9663]VR	K	R	736	745	10	2	8S(79.9663)	sp|Q8IYB3|SRRM1_HUMAN	Q8IYB3	SRRM1_HUMAN	SRRM1	Serine/arginine repetitive matrix protein 1			1	3215557	MS/MS	STY:79.9663@AAS(0.0483)PS(0.0483)PQS(0.9034)VR;
AASPSPQSVR	AASPS[79.9663]PQSVR	K	R	736	745	10	2	5S(79.9663)	sp|Q8IYB3|SRRM1_HUMAN	Q8IYB3	SRRM1_HUMAN	SRRM1	Serine/arginine repetitive matrix protein 1			1	7813591	MS/MS	STY:79.9663@AAS(0.0286)PS(0.9413)PQS(0.0302)VR;
AASPSPQSVR	AASPS[79.9663]PQS[79.9663]VR	K	R	736	745	10	2	5S(79.9663),8S(79.9663)	sp|Q8IYB3|SRRM1_HUMAN	Q8IYB3	SRRM1_HUMAN	SRRM1	Serine/arginine repetitive matrix protein 1			1	1.87748e+06	MS/MS	STY:79.9663@AAS(0.1379)PS(0.9311)PQS(0.9311)VR;
AASVAAATTSPTPR	AASVAAATT[79.9663]SPTPR	R	T	195	208	14	2	9T(79.9663)	sp|Q9Y2D9|ZN652_HUMAN	Q9Y2D9	ZN652_HUMAN	ZNF652	Zinc finger protein 652			1	0	MS/MS	STY:79.9663@AAS(0.0166)VAAAT(0.0166)T(0.3223)S(0.3223)PT(0.3223)PR;
AASLNYLNQPSAAPLQVSR	AAS[79.9663]LNYLNQPSAAPLQVSR	R	G	588	606	19	2	3S(79.9663)	sp|Q9NSK0|KLC4_HUMAN	Q9NSK0	KLC4_HUMAN	KLC4	Kinesin light chain 4			1	0	MS/MS	STY:79.9663@AAS(0.4876)LNY(0.4876)LNQPS(0.0124)AAPLQVS(0.0124)R;
AASLTEDR	AAS[79.9663]LTEDR	K	D	1207	1214	8	2	3S(79.9663)	sp|Q04637|IF4G1_HUMAN	Q04637	IF4G1_HUMAN	EIF4G1	Eukaryotic translation initiation factor 4 gamma 1			5	1.01519e+06	MS/MS	STY:79.9663@AAS(0.5000)LT(0.5000)EDR;
AASPPASASDLIEQQQK	AAS[79.9663]PPASASDLIEQQQK	R	R	333	349	17	2,3	3S(79.9663)	sp|Q5VSL9|STRP1_HUMAN	Q5VSL9	STRP1_HUMAN	STRIP1	Striatin-interacting protein 1			5	4.05241e+06	MS/MS	STY:79.9663@AAS(0.9426)PPAS(0.0294)AS(0.0280)DLIEQQQK;
AASPSPQSVR	AAS[79.9663]PSPQSVR	K	R	736	745	10	2	3S(79.9663)	sp|Q8IYB3|SRRM1_HUMAN	Q8IYB3	SRRM1_HUMAN	SRRM1	Serine/arginine repetitive matrix protein 1			12	1.0028454E7	MS/MS	STY:79.9663@AAS(0.9435)PS(0.0287)PQS(0.0278)VR;
AASPSPQSVR	AAS[79.9663]PS[79.9663]PQSVR	K	R	736	745	10	2	3S(79.9663),5S(79.9663)	sp|Q8IYB3|SRRM1_HUMAN	Q8IYB3	SRRM1_HUMAN	SRRM1	Serine/arginine repetitive matrix protein 1			8	2.74947e+06	MS/MS	STY:79.9663@AAS(0.6849)PS(0.6575)PQS(0.6575)VR;
AASSSSPGSPVASSPSR	AAS[79.9663]SSSPGSPVASSPSR	R	L	1777	1793	17	2	3S(79.9663)	sp|Q92538|GBF1_HUMAN	Q92538	GBF1_HUMAN	GBF1	Golgi-specific brefeldin A-resistance guanine nucleotide exchange factor 1			1	622516	MS/MS	STY:79.9663@AAS(0.1250)S(0.1250)S(0.1250)S(0.1250)PGS(0.1250)PVAS(0.1250)S(0.1250)PS(0.1250)R;
AASTDLGAGETVVGK	AAS[79.9663]TDLGAGETVVGK	K	V	971	985	15	2	3S(79.9663)	sp|Q15032|R3HD1_HUMAN	Q15032	R3HD1_HUMAN	R3HDM1	R3H domain-containing protein 1			2	587635	MS/MS	STY:79.9663@AAS(0.4889)T(0.4889)DLGAGET(0.0221)VVGK;
AAVGQESPGGLEAGNAK	AAVGQES[79.9663]PGGLEAGNAK	R	A	1299	1315	17	2	7S(79.9663)	sp|Q29RF7|PDS5A_HUMAN	Q29RF7	PDS5A_HUMAN	PDS5A	Sister chromatid cohesion protein PDS5 homolog A			3	2189589	MS/MS	STY:79.9663@AAVGQES(1.0000)PGGLEAGNAK;
AAVLSDSEDEEK	AAVLS[79.9663]DS[79.9663]EDEEK	K	A	394	405	12	2	5S(79.9663),7S(79.9663)	sp|Q96ST2|IWS1_HUMAN	Q96ST2	IWS1_HUMAN	IWS1	Protein IWS1 homolog			3	1.40069e+06	MS/MS	STY:79.9663@AAVLS(1.0000)DS(1.0000)EDEEK;
AAVQELSSSILAGEDPEER	AAVQELSSS[79.9663]ILAGEDPEER	R	G	359	377	19	2	9S(79.9663)	sp|P49768|PSN1_HUMAN	P49768	PSN1_HUMAN	PSEN1	Presenilin-1			2	0	MS/MS	STY:79.9663@AAVQELS(0.0459)S(0.0459)S(0.9081)ILAGEDPEER;
AAVTPGKK	AAVT[79.9663]PGKK	K	A	81	88	8	2	4T(79.9663)	sp|P19338|NUCL_HUMAN	P19338	NUCL_HUMAN	NCL	Nucleolin			5	1.67759e+06	MS/MS	STY:79.9663@AAVT(1.0000)PGKK;
AAVVTSPPPTTAPHK	AAVVTS[79.9663]PPPTTAPHK	R	E	7	21	15	2	6S(79.9663)	sp|P35611|ADDA_HUMAN	P35611	ADDA_HUMAN	ADD1	Alpha-adducin			1	1.10889e+06	MS/MS	STY:79.9663@AAVVT(0.0163)S(0.3279)PPPT(0.3279)T(0.3279)APHK;
AAVVTSPPPTTAPHK	AAVVT[79.9663]SPPPTTAPHK	R	E	7	21	15	2	5T(79.9663)	sp|P35611|ADDA_HUMAN	P35611	ADDA_HUMAN	ADD1	Alpha-adducin			4	1.10889e+06	MS/MS	STY:79.9663@AAVVT(0.4759)S(0.4759)PPPT(0.0241)T(0.0241)APHK;
ACASPSAQVEGSPVAGSDGSQPAVK	AC[57.0215]AS[79.9663]PSAQVEGSPVAGSDGSQPAVK	R	L	248	272	25	3	2C(57.0215),4S(79.9663)	sp|Q9UFC0|LRWD1_HUMAN	Q9UFC0	LRWD1_HUMAN	LRWD1	Leucine-rich repeat and WD repeat-containing protein 1			3	1.20458e+06	MS/MS	STY:79.9663@ACAS(0.3547)PS(0.3547)AQVEGS(0.0333)PVAGS(0.2052)DGS(0.0521)QPAVK;
ADAASSLTVDVTPPTAK	ADAASS[79.9663]LTVDVTPPTAK	K	A	404	420	17	2	6S(79.9663)	sp|Q9H8Y8|GORS2_HUMAN	Q9H8Y8	GORS2_HUMAN	GORASP2	Golgi reassembly-stacking protein 2			1	783671	MS/MS	STY:79.9663@ADAAS(0.0067)S(0.3104)LT(0.3104)VDVT(0.3104)PPT(0.0620)AK;
ADALQAGASQFETSAAK	ADALQAGASQFET[79.9663]SAAK	R	L	67	83	17	2	13T(79.9663)	sp|P63027|VAMP2_HUMAN	P63027	VAMP2_HUMAN	VAMP2	Vesicle-associated membrane protein 2	VAMP3	sp|Q15836|VAMP3_HUMAN	1	751172	MS/MS	STY:79.9663@ADALQAGAS(0.0191)QFET(0.4905)S(0.4905)AAK;
ADALQAGASQFETSAAK	ADALQAGAS[79.9663]QFETSAAK	R	L	67	83	17	2	9S(79.9663)	sp|P63027|VAMP2_HUMAN	P63027	VAMP2_HUMAN	VAMP2	Vesicle-associated membrane protein 2	VAMP3	sp|Q15836|VAMP3_HUMAN	1	751172	MS/MS	STY:79.9663@ADALQAGAS(0.3333)QFET(0.3333)S(0.3333)AAK;
ADAPDAGAQSDSELPSYHQNDVSLDR	ADAPDAGAQSDSELPSY[79.9663]HQNDVSLDR	R	G	1290	1315	26	3	17Y(79.9663)	sp|Q92538|GBF1_HUMAN	Q92538	GBF1_HUMAN	GBF1	Golgi-specific brefeldin A-resistance guanine nucleotide exchange factor 1			1	0	MS/MS	STY:79.9663@ADAPDAGAQS(0.0700)DS(0.0700)ELPS(0.0700)Y(0.3949)HQNDVS(0.3949)LDR;
ADAPDAGAQSDSELPSYHQNDVSLDR	ADAPDAGAQSDSELPS[79.9663]YHQNDVSLDR	R	G	1290	1315	26	3	16S(79.9663)	sp|Q92538|GBF1_HUMAN	Q92538	GBF1_HUMAN	GBF1	Golgi-specific brefeldin A-resistance guanine nucleotide exchange factor 1			1	2.318e+06	MS/MS	STY:79.9663@ADAPDAGAQS(0.0219)DS(0.0219)ELPS(0.4531)Y(0.4531)HQNDVS(0.0499)LDR;
ADAPDAGAQSDSELPSYHQNDVSLDR	ADAPDAGAQS[79.9663]DSELPSYHQNDVSLDR	R	G	1290	1315	26	3	10S(79.9663)	sp|Q92538|GBF1_HUMAN	Q92538	GBF1_HUMAN	GBF1	Golgi-specific brefeldin A-resistance guanine nucleotide exchange factor 1			6	4.07748e+06	MS/MS	STY:79.9663@ADAPDAGAQS(0.9341)DS(0.0175)ELPS(0.0165)Y(0.0159)HQNDVS(0.0159)LDR;
ADEASELACPTPK	ADEASELAC[57.0215]PT[79.9663]PK	K	E	2194	2206	13	2	11T(79.9663),9C(57.0215)	sp|P49327|FAS_HUMAN	P49327	FAS_HUMAN	FASN	Fatty acid synthase			4	7.4075e+06	MS/MS	STY:79.9663@ADEAS(0.0534)ELACPT(0.9466)PK;
ADEASELACPTPK	ADEAS[79.9663]ELAC[57.0215]PTPK	K	E	2194	2206	13	2	5S(79.9663),9C(57.0215)	sp|P49327|FAS_HUMAN	P49327	FAS_HUMAN	FASN	Fatty acid synthase			3	7.4075e+06	MS/MS	STY:79.9663@ADEAS(0.9446)ELACPT(0.0554)PK;
ADEPSSEESDLEIDK	ADEPSSEES[79.9663]DLEIDK	K	E	71	85	15	2	9S(79.9663)	sp|P50502|F10A1_HUMAN	P50502	F10A1_HUMAN	ST13	Hsc70-interacting protein	ST13P4	sp|Q8IZP2|ST134_HUMAN	4	3.81317e+06	MS/MS	STY:79.9663@ADEPS(0.0368)S(0.0368)EES(0.9264)DLEIDK;
ADEPSSEESDLEIDK	ADEPSS[79.9663]EESDLEIDK	K	E	71	85	15	2	6S(79.9663)	sp|P50502|F10A1_HUMAN	P50502	F10A1_HUMAN	ST13	Hsc70-interacting protein	ST13P4	sp|Q8IZP2|ST134_HUMAN	1	659611	MS/MS	STY:79.9663@ADEPS(0.0486)S(0.8988)EES(0.0525)DLEIDK;
ADEPSSEESDLEIDK	ADEPSS[79.9663]EES[79.9663]DLEIDK	K	E	71	85	15	2	6S(79.9663),9S(79.9663)	sp|P50502|F10A1_HUMAN	P50502	F10A1_HUMAN	ST13	Hsc70-interacting protein	ST13P4	sp|Q8IZP2|ST134_HUMAN	2	5688948	MS/MS	STY:79.9663@ADEPS(0.1648)S(0.9175)EES(0.9177)DLEIDK;
ADEPSSEESDLEIDK	ADEPS[79.9663]SEESDLEIDK	K	E	71	85	15	2	5S(79.9663)	sp|P50502|F10A1_HUMAN	P50502	F10A1_HUMAN	ST13	Hsc70-interacting protein	ST13P4	sp|Q8IZP2|ST134_HUMAN	5	4472785	MS/MS	STY:79.9663@ADEPS(0.5910)S(0.2045)EES(0.2045)DLEIDK;
ADEPSSEESDLEIDK	ADEPS[79.9663]SEES[79.9663]DLEIDK	K	E	71	85	15	2	5S(79.9663),9S(79.9663)	sp|P50502|F10A1_HUMAN	P50502	F10A1_HUMAN	ST13	Hsc70-interacting protein	ST13P4	sp|Q8IZP2|ST134_HUMAN	3	4.89486e+06	MS/MS	STY:79.9663@ADEPS(0.6575)S(0.6575)EES(0.6850)DLEIDK;
ADEPSSEESDLEIDK	ADEPS[79.9663]S[79.9663]EESDLEIDK	K	E	71	85	15	2	5S(79.9663),6S(79.9663)	sp|P50502|F10A1_HUMAN	P50502	F10A1_HUMAN	ST13	Hsc70-interacting protein	ST13P4	sp|Q8IZP2|ST134_HUMAN	3	5962488	MS/MS	STY:79.9663@ADEPS(0.9059)S(0.9059)EES(0.1883)DLEIDK;
ADEPSSEESDLEIDK	ADEPS[79.9663]S[79.9663]EES[79.9663]DLEIDK	K	E	71	85	15	2	5S(79.9663),6S(79.9663),9S(79.9663)	sp|P50502|F10A1_HUMAN	P50502	F10A1_HUMAN	ST13	Hsc70-interacting protein	ST13P4	sp|Q8IZP2|ST134_HUMAN	9	2.37829e+06	MS/MS	STY:79.9663@ADEPS(1.0000)S(1.0000)EES(1.0000)DLEIDK;
ADGYEPPVQESV	ADGYEPPVQES[79.9663]V	R	-	253	264	12	2	11S(79.9663)	sp|P61247|RS3A_HUMAN	P61247	RS3A_HUMAN	RPS3A	Small ribosomal subunit protein eS1			1	1.00686e+06	MS/MS	STY:79.9663@ADGY(0.0561)EPPVQES(0.9439)V;
ADIDVSGPK	ADIDVS[79.9663]GPK	K	V	1281	1289	9	2	6S(79.9663)	sp|Q09666|AHNK_HUMAN	Q09666	AHNK_HUMAN	AHNAK	Neuroblast differentiation-associated protein AHNAK			1	0	MS/MS	STY:79.9663@ADIDVS(1.0000)GPK;
ADLNQGIGEPQSPSR	ADLNQGIGEPQS[79.9663]PSR	R	R	63	77	15	2	12S(79.9663)	sp|Q96C19|EFHD2_HUMAN	Q96C19	EFHD2_HUMAN	EFHD2	EF-hand domain-containing protein D2			3	2.53155e+06	MS/MS	STY:79.9663@ADLNQGIGEPQS(0.8896)PS(0.1104)R;
ADSGPTQPPLSLSPAPETK	ADSGPTQPPLSLSPAPET[79.9663]K	R	R	2071	2089	19	2	18T(79.9663)	sp|O15027|SC16A_HUMAN	O15027	SC16A_HUMAN	SEC16A	Protein transport protein Sec16A			1	5217154	MS/MS	STY:79.9663@ADS(0.1155)GPT(0.3184)QPPLS(0.0804)LS(0.0086)PAPET(0.4771)K;
ADSDGAKPEPVAMAR	ADS[79.9663]DGAKPEPVAMAR	K	S	238	252	15	2	3S(79.9663)	sp|Q7Z4V5|HDGR2_HUMAN	Q7Z4V5	HDGR2_HUMAN	HDGFL2	Hepatoma-derived growth factor-related protein 2			8	3.76641e+06	MS/MS	STY:79.9663@ADS(1.0000)DGAKPEPVAMAR;
ADSDGAKPEPVAMAR	ADS[79.9663]DGAKPEPVAM[15.9949]AR	K	S	238	252	15	2	13M(15.9949),3S(79.9663)	sp|Q7Z4V5|HDGR2_HUMAN	Q7Z4V5	HDGR2_HUMAN	HDGFL2	Hepatoma-derived growth factor-related protein 2			1	660432	MS/MS	STY:79.9663@ADS(1.0000)DGAKPEPVAMAR;M:15.9949@ADSDGAKPEPVAM(1.0000)AR;
ADSGPTQPPLSLSPAPETK	ADS[79.9663]GPTQPPLSLSPAPETK	R	R	2071	2089	19	2	3S(79.9663)	sp|O15027|SC16A_HUMAN	O15027	SC16A_HUMAN	SEC16A	Protein transport protein Sec16A			2	5217154	MS/MS	STY:79.9663@ADS(0.7469)GPT(0.0245)QPPLS(0.0762)LS(0.0762)PAPET(0.0762)K;
AEAPLPSPK	AEAPLPS[79.9663]PK	K	L	5104	5112	9	2	7S(79.9663)	sp|Q09666|AHNK_HUMAN	Q09666	AHNK_HUMAN	AHNAK	Neuroblast differentiation-associated protein AHNAK			5	2.88232e+06	MS/MS	STY:79.9663@AEAPLPS(1.0000)PK;
AEDEALLSEEDDPIDR	AEDEALLS[79.9663]EEDDPIDR	K	R	1771	1786	16	2	8S(79.9663)	sp|Q04721|NOTC2_HUMAN	Q04721	NOTC2_HUMAN	NOTCH2	Neurogenic locus notch homolog protein 2			3	0	MS/MS	STY:79.9663@AEDEALLS(1.0000)EEDDPIDR;
AEDGATPSPSNETPK	AEDGATPSPSNET[79.9663]PK	K	K	138	152	15	2	13T(79.9663)	sp|P29966|MARCS_HUMAN	P29966	MARCS_HUMAN	MARCKS	Myristoylated alanine-rich C-kinase substrate			2	2.789488E7	MS/MS	STY:79.9663@AEDGAT(0.0204)PS(0.0204)PS(0.0204)NET(0.9387)PK;
AEDGATPSPSNETPK	AEDGATPSPS[79.9663]NETPK	K	K	138	152	15	2	10S(79.9663)	sp|P29966|MARCS_HUMAN	P29966	MARCS_HUMAN	MARCKS	Myristoylated alanine-rich C-kinase substrate			1	1.8455166E7	MS/MS	STY:79.9663@AEDGAT(0.1858)PS(0.1858)PS(0.6151)NET(0.0132)PK;
AEDGATPSPSNETPKK	AEDGATPSPS[79.9663]NETPKK	K	K	138	153	16	2	10S(79.9663)	sp|P29966|MARCS_HUMAN	P29966	MARCS_HUMAN	MARCKS	Myristoylated alanine-rich C-kinase substrate			3	3233008	MS/MS	STY:79.9663@AEDGAT(0.0197)PS(0.0197)PS(0.9182)NET(0.0423)PKK;
AEDGATPSPSNETPK	AEDGATPS[79.9663]PSNETPK	K	K	138	152	15	2	8S(79.9663)	sp|P29966|MARCS_HUMAN	P29966	MARCS_HUMAN	MARCKS	Myristoylated alanine-rich C-kinase substrate			7	2.789488E7	MS/MS	STY:79.9663@AEDGAT(0.0083)PS(0.3306)PS(0.3306)NET(0.3306)PK;
AEDGATPSPSNETPKK	AEDGATPS[79.9663]PSNETPKK	K	K	138	153	16	2	8S(79.9663)	sp|P29966|MARCS_HUMAN	P29966	MARCS_HUMAN	MARCKS	Myristoylated alanine-rich C-kinase substrate			2	1.805e+06	MS/MS	STY:79.9663@AEDGAT(0.0222)PS(0.7458)PS(0.1160)NET(0.1160)PKK;
AEDGATPSPSNETPK	AEDGAT[79.9663]PSPSNETPK	K	K	138	152	15	2	6T(79.9663)	sp|P29966|MARCS_HUMAN	P29966	MARCS_HUMAN	MARCKS	Myristoylated alanine-rich C-kinase substrate			17	2.0688092E7	MS/MS	STY:79.9663@AEDGAT(0.9288)PS(0.0239)PS(0.0239)NET(0.0233)PK;
AEDGATPSPSNETPKK	AEDGAT[79.9663]PSPSNETPKK	K	K	138	153	16	2	6T(79.9663)	sp|P29966|MARCS_HUMAN	P29966	MARCS_HUMAN	MARCKS	Myristoylated alanine-rich C-kinase substrate			13	3233008	MS/MS	STY:79.9663@AEDGAT(0.9308)PS(0.0231)PS(0.0231)NET(0.0231)PKK;
AEDSDSEPEPEDNVR	AEDS[79.9663]DS[79.9663]EPEPEDNVR	K	L	496	510	15	2	4S(79.9663),6S(79.9663)	sp|Q9H0D6|XRN2_HUMAN	Q9H0D6	XRN2_HUMAN	XRN2	5'-3' exoribonuclease 2			2	0	MS/MS	STY:79.9663@AEDS(1.0000)DS(1.0000)EPEPEDNVR;
AEEDEILNRSPR	AEEDEILNRS[79.9663]PR	K	N	574	585	12	2	10S(79.9663)	sp|P27824|CALX_HUMAN	P27824	CALX_HUMAN	CANX	Calnexin			97	5.6887704E7	MS/MS	STY:79.9663@AEEDEILNRS(1.0000)PR;
AEENTDQASPQEDYAGFER	AEENTDQASPQEDY[79.9663]AGFER	K	L	4530	4548	19	2	14Y(79.9663)	sp|Q9NU22|MDN1_HUMAN	Q9NU22	MDN1_HUMAN	MDN1	Midasin			1	0	MS/MS	STY:79.9663@AEENT(0.0913)DQAS(0.0913)PQEDY(0.8174)AGFER;
AEENTDQASPQEDYAGFER	AEENTDQAS[79.9663]PQEDYAGFER	K	L	4530	4548	19	3	9S(79.9663)	sp|Q9NU22|MDN1_HUMAN	Q9NU22	MDN1_HUMAN	MDN1	Midasin			1	0	MS/MS	STY:79.9663@AEENT(0.0421)DQAS(0.9251)PQEDY(0.0328)AGFER;
AEEPPSQLDQDTQVQDMDEGSDDEEEGQK	AEEPPSQLDQDTQVQDMDEGS[79.9663]DDEEEGQK	K	V	339	367	29	3	21S(79.9663)	sp|Q15459|SF3A1_HUMAN	Q15459	SF3A1_HUMAN	SF3A1	Splicing factor 3A subunit 1			12	3.5630564E7	MS/MS	STY:79.9663@AEEPPS(0.0453)QLDQDT(0.0271)QVQDMDEGS(0.9275)DDEEEGQK;
AEEPPSQLDQDTQVQDMDEGSDDEEEGQK	AEEPPSQLDQDTQVQDM[15.9949]DEGS[79.9663]DDEEEGQK	K	V	339	367	29	3	17M(15.9949),21S(79.9663)	sp|Q15459|SF3A1_HUMAN	Q15459	SF3A1_HUMAN	SF3A1	Splicing factor 3A subunit 1			5	7612930	MS/MS	STY:79.9663@AEEPPS(0.0501)QLDQDT(0.0320)QVQDMDEGS(0.9179)DDEEEGQK;M:15.9949@AEEPPSQLDQDTQVQDM(1.0000)DEGSDDEEEGQK;
AEEPPSQLDQDTQVQDMDEGSDDEEEGQK	AEEPPSQLDQDT[79.9663]QVQDMDEGSDDEEEGQK	K	V	339	367	29	3	12T(79.9663)	sp|Q15459|SF3A1_HUMAN	Q15459	SF3A1_HUMAN	SF3A1	Splicing factor 3A subunit 1			5	3.5630564E7	MS/MS	STY:79.9663@AEEPPS(0.0330)QLDQDT(0.8812)QVQDMDEGS(0.0858)DDEEEGQK;
AEEPPSQLDQDTQVQDMDEGSDDEEEGQK	AEEPPSQLDQDT[79.9663]QVQDM[15.9949]DEGSDDEEEGQK	K	V	339	367	29	3	12T(79.9663),17M(15.9949)	sp|Q15459|SF3A1_HUMAN	Q15459	SF3A1_HUMAN	SF3A1	Splicing factor 3A subunit 1			1	891057	MS/MS	STY:79.9663@AEEPPS(0.0327)QLDQDT(0.5312)QVQDMDEGS(0.4361)DDEEEGQK;M:15.9949@AEEPPSQLDQDTQVQDM(1.0000)DEGSDDEEEGQK;
AEEPPSQLDQDTQVQDMDEGSDDEEEGQK	AEEPPS[79.9663]QLDQDTQVQDMDEGSDDEEEGQK	K	V	339	367	29	3	6S(79.9663)	sp|Q15459|SF3A1_HUMAN	Q15459	SF3A1_HUMAN	SF3A1	Splicing factor 3A subunit 1			4	3.1483228E7	MS/MS	STY:79.9663@AEEPPS(0.8693)QLDQDT(0.0355)QVQDMDEGS(0.0951)DDEEEGQK;
AEEPPSQLDQDTQVQDMDEGSDDEEEGQK	AEEPPS[79.9663]QLDQDTQVQDM[15.9949]DEGSDDEEEGQK	K	V	339	367	29	3	17M(15.9949),6S(79.9663)	sp|Q15459|SF3A1_HUMAN	Q15459	SF3A1_HUMAN	SF3A1	Splicing factor 3A subunit 1			3	7612930	MS/MS	STY:79.9663@AEEPPS(0.8558)QLDQDT(0.0721)QVQDMDEGS(0.0721)DDEEEGQK;M:15.9949@AEEPPSQLDQDTQVQDM(1.0000)DEGSDDEEEGQK;
AEGAATEEEGTPK	AEGAATEEEGT[79.9663]PK	K	E	26	38	13	2	11T(79.9663)	sp|P80723|BASP1_HUMAN	P80723	BASP1_HUMAN	BASP1	Brain acid soluble protein 1			6	6482627	MS/MS	STY:79.9663@AEGAAT(0.0556)EEEGT(0.9444)PK;
AEGAATEEEGTPK	AEGAAT[79.9663]EEEGTPK	K	E	26	38	13	2	6T(79.9663)	sp|P80723|BASP1_HUMAN	P80723	BASP1_HUMAN	BASP1	Brain acid soluble protein 1			12	6482627	MS/MS	STY:79.9663@AEGAAT(0.8399)EEEGT(0.1601)PK;
AEGEPQEESPLK	AEGEPQEES[79.9663]PLK	K	S	169	180	12	2	9S(79.9663)	sp|Q9NYF8|BCLF1_HUMAN	Q9NYF8	BCLF1_HUMAN	BCLAF1	Bcl-2-associated transcription factor 1			10	1.2009306E7	MS/MS	STY:79.9663@AEGEPQEES(1.0000)PLK;
AEGEWEDQEALDYFSDK	AEGEWEDQEALDYFS[79.9663]DK	R	E	371	387	17	2	15S(79.9663)	sp|Q9NYF8|BCLF1_HUMAN	Q9NYF8	BCLF1_HUMAN	BCLAF1	Bcl-2-associated transcription factor 1			1	0	MS/MS	STY:79.9663@AEGEWEDQEALDY(0.1252)FS(0.8748)DK;
AEGSPNQGK	AEGS[79.9663]PNQGK	K	K	580	588	9	2	4S(79.9663)	sp|Q9P2E9|RRBP1_HUMAN	Q9P2E9	RRBP1_HUMAN	RRBP1	Ribosome-binding protein 1			1	292824	MS/MS	STY:79.9663@AEGS(1.0000)PNQGK;
AELGMGDSTSQSPPIK	AELGMGDST[79.9663]SQSPPIK	R	R	256	271	16	2	9T(79.9663)	sp|Q9NR19|ACSA_HUMAN	Q9NR19	ACSA_HUMAN	ACSS2	Acetyl-coenzyme A synthetase, cytoplasmic			1	725275	MS/MS	STY:79.9663@AELGMGDS(0.0319)T(0.4546)S(0.4546)QS(0.0589)PPIK;
AENAEGQTPAIGPDGEPLDETSQMSDLPVK	AENAEGQTPAIGPDGEPLDET[79.9663]SQMSDLPVK	K	V	589	618	30	3	21T(79.9663)	sp|P51532|SMCA4_HUMAN	P51532	SMCA4_HUMAN	SMARCA4	Transcription activator BRG1			1	0	MS/MS	STY:79.9663@AENAEGQT(0.3759)PAIGPDGEPLDET(0.5351)S(0.0166)QMS(0.0724)DLPVK;
AEQGSEEEGEGEEEEEEGGESK	AEQGS[79.9663]EEEGEGEEEEEEGGESK	K	A	224	245	22	2,3	5S(79.9663)	sp|Q8NE71|ABCF1_HUMAN	Q8NE71	ABCF1_HUMAN	ABCF1	ATP-binding cassette sub-family F member 1			4	6.60037e+06	MS/MS	STY:79.9663@AEQGS(0.9436)EEEGEGEEEEEEGGES(0.0564)K;
AESPESSAIESTQSTPQK	AESPES[79.9663]SAIESTQSTPQK	R	G	1356	1373	18	3	6S(79.9663)	sp|Q9NTI5|PDS5B_HUMAN	Q9NTI5	PDS5B_HUMAN	PDS5B	Sister chromatid cohesion protein PDS5 homolog B			1	2730886	MS/MS	STY:79.9663@AES(0.0141)PES(0.9053)S(0.0132)AIES(0.0091)T(0.0091)QS(0.0246)T(0.0246)PQK;
AESPSPAPPPGLR	AESPS[79.9663]PAPPPGLR	R	G	306	318	13	2	5S(79.9663)	sp|Q9BUA3|SPNDC_HUMAN	Q9BUA3	SPNDC_HUMAN	SPINDOC	Spindlin interactor and repressor of chromatin-binding protein			1	1.37833e+06	MS/MS	STY:79.9663@AES(0.0787)PS(0.9213)PAPPPGLR;
AESSSGGGTVPSSAGILEQGPSPGDGSPPKPK	AESSSGGGTVPSSAGILEQGPSPGDGS[79.9663]PPKPK	R	D	549	580	32	3	27S(79.9663)	sp|Q68EM7|RHG17_HUMAN	Q68EM7	RHG17_HUMAN	ARHGAP17	Rho GTPase-activating protein 17			4	2.77051e+06	MS/MS	STY:79.9663@AES(0.0168)S(0.0168)S(0.0168)GGGT(0.0088)VPS(0.0095)S(0.0095)AGILEQGPS(0.0095)PGDGS(0.9124)PPKPK;
AESSSGGGTVPSSAGILEQGPSPGDGSPPKPK	AESSSGGGTVPSSAGILEQGPS[79.9663]PGDGSPPKPK	R	D	549	580	32	3	22S(79.9663)	sp|Q68EM7|RHG17_HUMAN	Q68EM7	RHG17_HUMAN	ARHGAP17	Rho GTPase-activating protein 17			1	1.47422e+06	MS/MS	STY:79.9663@AES(0.0073)S(0.0073)S(0.0073)GGGT(0.0073)VPS(0.0171)S(0.0171)AGILEQGPS(0.4684)PGDGS(0.4684)PPKPK;
AESPAEK	AES[79.9663]PAEK	K	V	488	494	7	2	3S(79.9663)	sp|Q9UKV3|ACINU_HUMAN	Q9UKV3	ACINU_HUMAN	ACIN1	Apoptotic chromatin condensation inducer in the nucleus			2	1.4344e+06	MS/MS	STY:79.9663@AES(1.0000)PAEK;
AESPEEVACR	AES[79.9663]PEEVAC[57.0215]R	R	K	1393	1402	10	2	3S(79.9663),9C(57.0215)	sp|Q7Z6Z7|HUWE1_HUMAN	Q7Z6Z7	HUWE1_HUMAN	HUWE1	E3 ubiquitin-protein ligase HUWE1			4	2.20314e+06	MS/MS	STY:79.9663@AES(1.0000)PEEVACR;
AESPESSAIESTQSTPQK	AES[79.9663]PESSAIESTQSTPQK	R	G	1356	1373	18	2,3	3S(79.9663)	sp|Q9NTI5|PDS5B_HUMAN	Q9NTI5	PDS5B_HUMAN	PDS5B	Sister chromatid cohesion protein PDS5 homolog B			9	1.4120254E7	MS/MS	STY:79.9663@AES(0.9335)PES(0.0104)S(0.0129)AIES(0.0109)T(0.0109)QS(0.0107)T(0.0107)PQK;
AESPESSAIESTQSTPQK	AES[79.9663]PESSAIES[79.9663]TQSTPQK	R	G	1356	1373	18	2	11S(79.9663),3S(79.9663)	sp|Q9NTI5|PDS5B_HUMAN	Q9NTI5	PDS5B_HUMAN	PDS5B	Sister chromatid cohesion protein PDS5 homolog B			1	1220936	MS/MS	STY:79.9663@AES(0.4584)PES(0.0117)S(0.0117)AIES(0.3795)T(0.3795)QS(0.3795)T(0.3795)PQK;
AESPESSAIESTQSTPQK	AES[79.9663]PES[79.9663]SAIESTQSTPQK	R	G	1356	1373	18	2	3S(79.9663),6S(79.9663)	sp|Q9NTI5|PDS5B_HUMAN	Q9NTI5	PDS5B_HUMAN	PDS5B	Sister chromatid cohesion protein PDS5 homolog B			1	988615	MS/MS	STY:79.9663@AES(0.2857)PES(0.2857)S(0.2857)AIES(0.2857)T(0.2857)QS(0.2857)T(0.2857)PQK;
AESPSPAPPPGLR	AES[79.9663]PSPAPPPGLR	R	G	306	318	13	2	3S(79.9663)	sp|Q9BUA3|SPNDC_HUMAN	Q9BUA3	SPNDC_HUMAN	SPINDOC	Spindlin interactor and repressor of chromatin-binding protein			3	1.37833e+06	MS/MS	STY:79.9663@AES(0.5000)PS(0.5000)PAPPPGLR;
AETPTESVSEPEVATK	AETPTESVSEPEVAT[79.9663]K	K	Q	193	208	16	2	15T(79.9663)	sp|P18858|DNLI1_HUMAN	P18858	DNLI1_HUMAN	LIG1	DNA ligase 1			3	2.72558e+06	MS/MS	STY:79.9663@AET(0.0155)PT(0.0166)ES(0.0166)VS(0.0166)EPEVAT(0.9347)K;
AETSEGSGSAPAVPEASASPK	AETSEGSGSAPAVPEAS[79.9663]ASPK	K	Q	62	82	21	2,3	17S(79.9663)	sp|P51608|MECP2_HUMAN	P51608	MECP2_HUMAN	MECP2	Methyl-CpG-binding protein 2			4	3.17954e+06	MS/MS	STY:79.9663@AET(0.0082)S(0.0082)EGS(0.0082)GS(0.0082)APAVPEAS(0.4836)AS(0.4836)PK;
AETPTESVSEPEVATK	AET[79.9663]PTESVSEPEVATK	K	Q	193	208	16	2	3T(79.9663)	sp|P18858|DNLI1_HUMAN	P18858	DNLI1_HUMAN	LIG1	DNA ligase 1			1	2.72558e+06	MS/MS	STY:79.9663@AET(0.8764)PT(0.0309)ES(0.0309)VS(0.0309)EPEVAT(0.0309)K;
AEVYGSENESER	AEVY[79.9663]GSENESER	K	N	345	356	12	2	4Y(79.9663)	sp|Q9BVS4|RIOK2_HUMAN	Q9BVS4	RIOK2_HUMAN	RIOK2	Serine/threonine-protein kinase RIO2			2	507352	MS/MS	STY:79.9663@AEVY(0.4900)GS(0.4900)ENES(0.0200)ER;
AFQLEEGEETEPDCK	AFQLEEGEET[79.9663]EPDC[57.0215]K	R	Y	113	127	15	2	10T(79.9663),14C(57.0215)	sp|P38432|COIL_HUMAN	P38432	COIL_HUMAN	COIL	Coilin			3	1.619e+06	MS/MS	STY:79.9663@AFQLEEGEET(1.0000)EPDCK;
AFVEDSEDEDGAGEGGSSLLQK	AFVEDSEDEDGAGEGGS[79.9663]SLLQK	R	R	166	187	22	3	17S(79.9663)	sp|Q8N9T8|KRI1_HUMAN	Q8N9T8	KRI1_HUMAN	KRI1	Protein KRI1 homolog			1	0	MS/MS	STY:79.9663@AFVEDS(0.1168)EDEDGAGEGGS(0.4416)S(0.4416)LLQK;
AFVEDSEDEDGAGEGGSSLLQK	AFVEDS[79.9663]EDEDGAGEGGSSLLQK	R	R	166	187	22	2,3	6S(79.9663)	sp|Q8N9T8|KRI1_HUMAN	Q8N9T8	KRI1_HUMAN	KRI1	Protein KRI1 homolog			4	1.09349e+06	MS/MS	STY:79.9663@AFVEDS(0.9153)EDEDGAGEGGS(0.0424)S(0.0424)LLQK;
AGDLLEDSPK	AGDLLEDS[79.9663]PK	R	R	158	167	10	2	8S(79.9663)	sp|P51858|HDGF_HUMAN	P51858	HDGF_HUMAN	HDGF	Hepatoma-derived growth factor			86	1.62487008E8	MS/MS	STY:79.9663@AGDLLEDS(1.0000)PK;
AGDLLEDSPKRPK	AGDLLEDS[79.9663]PKRPK	R	E	158	170	13	3	8S(79.9663)	sp|P51858|HDGF_HUMAN	P51858	HDGF_HUMAN	HDGF	Hepatoma-derived growth factor			7	669655	MS/MS	STY:79.9663@AGDLLEDS(1.0000)PKRPK;
AGEEDEGEEDSDSDYEISAK	AGEEDEGEEDS[79.9663]DSDYEISAK	R	A	463	482	20	2	11S(79.9663)	sp|A2RRP1|NBAS_HUMAN	A2RRP1	NBAS_HUMAN	NBAS	NBAS subunit of NRZ tethering complex			1	0	MS/MS	STY:79.9663@AGEEDEGEEDS(0.2500)DS(0.2500)DY(0.2500)EIS(0.2500)AK;
AGEPDGESLDEQPSSSSSK	AGEPDGESLDEQPSSSS[79.9663]SK	K	R	57	75	19	2	17S(79.9663)	sp|Q9H3Q1|BORG4_HUMAN	Q9H3Q1	BORG4_HUMAN	CDC42EP4	Cdc42 effector protein 4			1	661819	MS/MS	STY:79.9663@AGEPDGES(0.1176)LDEQPS(0.1176)S(0.1176)S(0.1176)S(0.2649)S(0.2649)K;
AGEPDGESLDEQPSSSSSK	AGEPDGES[79.9663]LDEQPSSSSSK	K	R	57	75	19	2	8S(79.9663)	sp|Q9H3Q1|BORG4_HUMAN	Q9H3Q1	BORG4_HUMAN	CDC42EP4	Cdc42 effector protein 4			2	986147	MS/MS	STY:79.9663@AGEPDGES(0.9288)LDEQPS(0.0120)S(0.0149)S(0.0148)S(0.0148)S(0.0148)K;
AGEPNSPDAEEANSPDVTAGCDPAGVHPPR	AGEPNSPDAEEANSPDVT[79.9663]AGC[57.0215]DPAGVHPPR	R	-	738	767	30	3	18T(79.9663),21C(57.0215)	sp|Q08J23|NSUN2_HUMAN	Q08J23	NSUN2_HUMAN	NSUN2	RNA cytosine C(5)-methyltransferase NSUN2			6	9227481	MS/MS	STY:79.9663@AGEPNS(0.0468)PDAEEANS(0.0468)PDVT(0.9065)AGCDPAGVHPPR;
AGEPNSPDAEEANSPDVTAGCDPAGVHPPR	AGEPNSPDAEEANS[79.9663]PDVTAGC[57.0215]DPAGVHPPR	R	-	738	767	30	3,4	14S(79.9663),21C(57.0215)	sp|Q08J23|NSUN2_HUMAN	Q08J23	NSUN2_HUMAN	NSUN2	RNA cytosine C(5)-methyltransferase NSUN2			6	1.0282842E7	MS/MS	STY:79.9663@AGEPNS(0.0407)PDAEEANS(0.9305)PDVT(0.0288)AGCDPAGVHPPR;
AGEPNSPDAEEANSPDVTAGCDPAGVHPPR	AGEPNSPDAEEANS[79.9663]PDVT[79.9663]AGC[57.0215]DPAGVHPPR	R	-	738	767	30	3,4	14S(79.9663),18T(79.9663),21C(57.0215)	sp|Q08J23|NSUN2_HUMAN	Q08J23	NSUN2_HUMAN	NSUN2	RNA cytosine C(5)-methyltransferase NSUN2			3	3.1087822E7	MS/MS	STY:79.9663@AGEPNS(0.1542)PDAEEANS(0.9229)PDVT(0.9229)AGCDPAGVHPPR;
AGEPNSPDAEEANSPDVTAGCDPAGVHPPR	AGEPNS[79.9663]PDAEEANSPDVTAGC[57.0215]DPAGVHPPR	R	-	738	767	30	3,4	21C(57.0215),6S(79.9663)	sp|Q08J23|NSUN2_HUMAN	Q08J23	NSUN2_HUMAN	NSUN2	RNA cytosine C(5)-methyltransferase NSUN2			12	1.1293928E7	MS/MS	STY:79.9663@AGEPNS(0.9362)PDAEEANS(0.0353)PDVT(0.0285)AGCDPAGVHPPR;
AGEPNSPDAEEANSPDVTAGCDPAGVHPPR	AGEPNS[79.9663]PDAEEANSPDVT[79.9663]AGC[57.0215]DPAGVHPPR	R	-	738	767	30	3	18T(79.9663),21C(57.0215),6S(79.9663)	sp|Q08J23|NSUN2_HUMAN	Q08J23	NSUN2_HUMAN	NSUN2	RNA cytosine C(5)-methyltransferase NSUN2			3	3.3802764E7	MS/MS	STY:79.9663@AGEPNS(0.9061)PDAEEANS(0.1846)PDVT(0.9092)AGCDPAGVHPPR;
AGEPNSPDAEEANSPDVTAGCDPAGVHPPR	AGEPNS[79.9663]PDAEEANS[79.9663]PDVTAGC[57.0215]DPAGVHPPR	R	-	738	767	30	3,4	14S(79.9663),21C(57.0215),6S(79.9663)	sp|Q08J23|NSUN2_HUMAN	Q08J23	NSUN2_HUMAN	NSUN2	RNA cytosine C(5)-methyltransferase NSUN2			19	4.5506404E7	MS/MS	STY:79.9663@AGEPNS(0.9494)PDAEEANS(0.9494)PDVT(0.1012)AGCDPAGVHPPR;
AGEQQLSEPEDMEMEAGDTDDPPR	AGEQQLSEPEDMEMEAGDT[79.9663]DDPPR	K	I	12	35	24	3	19T(79.9663)	sp|Q93009|UBP7_HUMAN	Q93009	UBP7_HUMAN	USP7	Ubiquitin carboxyl-terminal hydrolase 7			1	4848487	MS/MS	STY:79.9663@AGEQQLS(0.4853)EPEDMEMEAGDT(0.5147)DDPPR;
AGEQQLSEPEDMEMEAGDTDDPPR	AGEQQLS[79.9663]EPEDMEMEAGDTDDPPR	K	I	12	35	24	3	7S(79.9663)	sp|Q93009|UBP7_HUMAN	Q93009	UBP7_HUMAN	USP7	Ubiquitin carboxyl-terminal hydrolase 7			9	6001399	MS/MS	STY:79.9663@AGEQQLS(0.9167)EPEDMEMEAGDT(0.0833)DDPPR;
AGEQQLSEPEDMEMEAGDTDDPPR	AGEQQLS[79.9663]EPEDMEM[15.9949]EAGDTDDPPR	K	I	12	35	24	3	14M(15.9949),7S(79.9663)	sp|Q93009|UBP7_HUMAN	Q93009	UBP7_HUMAN	USP7	Ubiquitin carboxyl-terminal hydrolase 7			1	648683	MS/MS	STY:79.9663@AGEQQLS(0.9418)EPEDMEMEAGDT(0.0582)DDPPR;M:15.9949@AGEQQLSEPEDM(0.0947)EM(0.9053)EAGDTDDPPR;
AGGASPAASSTAQPPTQHR	AGGASPAASS[79.9663]TAQPPTQHR	R	L	449	467	19	2	10S(79.9663)	sp|Q8IU81|I2BP1_HUMAN	Q8IU81	I2BP1_HUMAN	IRF2BP1	Interferon regulatory factor 2-binding protein 1			1	290979	MS/MS	STY:79.9663@AGGAS(0.0993)PAAS(0.0993)S(0.3929)T(0.3929)AQPPT(0.0156)QHR;
AGGPATPLSPTR	AGGPAT[79.9663]PLSPTR	R	L	29	40	12	2	6T(79.9663)	sp|Q03252|LMNB2_HUMAN	Q03252	LMNB2_HUMAN	LMNB2	Lamin-B2			2	288602	MS/MS	STY:79.9663@AGGPAT(0.9422)PLS(0.0289)PT(0.0289)R;
AGGPTTPLSPTR	AGGPTTPLS[79.9663]PTR	R	L	15	26	12	2	9S(79.9663)	sp|P20700|LMNB1_HUMAN	P20700	LMNB1_HUMAN	LMNB1	Lamin-B1			3	3.32425e+06	MS/MS	STY:79.9663@AGGPT(0.0257)T(0.0190)PLS(0.9184)PT(0.0369)R;
AGGPTTPLSPTR	AGGPT[79.9663]TPLSPTR	R	L	15	26	12	2	5T(79.9663)	sp|P20700|LMNB1_HUMAN	P20700	LMNB1_HUMAN	LMNB1	Lamin-B1			1	2708630	MS/MS	STY:79.9663@AGGPT(0.2500)T(0.2500)PLS(0.2500)PT(0.2500)R;
AGGPTTPLSPTR	AGGPT[79.9663]TPLSPT[79.9663]R	R	L	15	26	12	2	11T(79.9663),5T(79.9663)	sp|P20700|LMNB1_HUMAN	P20700	LMNB1_HUMAN	LMNB1	Lamin-B1			1	901134	MS/MS	STY:79.9663@AGGPT(0.4898)T(0.4898)PLS(0.4898)PT(0.5306)R;
AGGSAALSPSK	AGGSAALSPS[79.9663]K	K	K	24	34	11	2	10S(79.9663)	sp|Q92522|H1X_HUMAN	Q92522	H1X_HUMAN	H1-10	Histone H1.10			5	7.04804e+06	MS/MS	STY:79.9663@AGGS(0.0261)AALS(0.0925)PS(0.8814)K;
AGGSAALSPSKK	AGGSAALSPS[79.9663]KK	K	R	24	35	12	2	10S(79.9663)	sp|Q92522|H1X_HUMAN	Q92522	H1X_HUMAN	H1-10	Histone H1.10			1	287845	MS/MS	STY:79.9663@AGGS(0.0744)AALS(0.0744)PS(0.8512)KK;
AGGSAALSPSK	AGGSAALS[79.9663]PSK	K	K	24	34	11	2	8S(79.9663)	sp|Q92522|H1X_HUMAN	Q92522	H1X_HUMAN	H1-10	Histone H1.10			23	1.4501912E7	MS/MS	STY:79.9663@AGGS(0.0295)AALS(0.9421)PS(0.0284)K;
AGGSAALSPSKK	AGGSAALS[79.9663]PSKK	K	R	24	35	12	2	8S(79.9663)	sp|Q92522|H1X_HUMAN	Q92522	H1X_HUMAN	H1-10	Histone H1.10			1	287845	MS/MS	STY:79.9663@AGGS(0.0268)AALS(0.4866)PS(0.4866)KK;
AGGSPAPGPETPAISPSK	AGGSPAPGPETPAIS[79.9663]PSK	K	R	85	102	18	2	15S(79.9663)	sp|P33316|DUT_HUMAN	P33316	DUT_HUMAN	DUT	Deoxyuridine 5'-triphosphate nucleotidohydrolase, mitochondrial			1	650788	MS/MS	STY:79.9663@AGGS(0.0219)PAPGPET(0.0315)PAIS(0.4733)PS(0.4733)K;
AGGSAALSPSK	AGGS[79.9663]AALSPSK	K	K	24	34	11	2	4S(79.9663)	sp|Q92522|H1X_HUMAN	Q92522	H1X_HUMAN	H1-10	Histone H1.10			31	1.405243E7	MS/MS	STY:79.9663@AGGS(0.9382)AALS(0.0309)PS(0.0309)K;
AGGSAALSPSKK	AGGS[79.9663]AALSPSKK	K	R	24	35	12	2	4S(79.9663)	sp|Q92522|H1X_HUMAN	Q92522	H1X_HUMAN	H1-10	Histone H1.10			2	287845	MS/MS	STY:79.9663@AGGS(0.8868)AALS(0.0566)PS(0.0566)KK;
AGLESGAEPGDGDSDTTK	AGLESGAEPGDGDSDTT[79.9663]K	K	K	481	498	18	2	17T(79.9663)	sp|O60832|DKC1_HUMAN	O60832	DKC1_HUMAN	DKC1	H/ACA ribonucleoprotein complex subunit DKC1			1	3.42234e+06	MS/MS	STY:79.9663@AGLES(0.0413)GAEPGDGDS(0.0795)DT(0.0795)T(0.7997)K;
AGLESGAEPGDGDSDTTK	AGLESGAEPGDGDSDT[79.9663]TK	K	K	481	498	18	2	16T(79.9663)	sp|O60832|DKC1_HUMAN	O60832	DKC1_HUMAN	DKC1	H/ACA ribonucleoprotein complex subunit DKC1			2	2.0258918E7	MS/MS	STY:79.9663@AGLES(0.0124)GAEPGDGDS(0.0129)DT(0.4874)T(0.4874)K;
AGLESGAEPGDGDSDTTK	AGLESGAEPGDGDS[79.9663]DTTK	K	K	481	498	18	2	14S(79.9663)	sp|O60832|DKC1_HUMAN	O60832	DKC1_HUMAN	DKC1	H/ACA ribonucleoprotein complex subunit DKC1			15	4.2524016E7	MS/MS	STY:79.9663@AGLES(0.0185)GAEPGDGDS(0.9433)DT(0.0191)T(0.0191)K;
AGLESGAEPGDGDSDTTKK	AGLESGAEPGDGDS[79.9663]DTTKK	K	K	481	499	19	2	14S(79.9663)	sp|O60832|DKC1_HUMAN	O60832	DKC1_HUMAN	DKC1	H/ACA ribonucleoprotein complex subunit DKC1			3	1.35634e+06	MS/MS	STY:79.9663@AGLES(0.0085)GAEPGDGDS(0.3305)DT(0.3305)T(0.3305)KK;
AGLESGAEPGDGDSDTTK	AGLES[79.9663]GAEPGDGDSDTTK	K	K	481	498	18	2	5S(79.9663)	sp|O60832|DKC1_HUMAN	O60832	DKC1_HUMAN	DKC1	H/ACA ribonucleoprotein complex subunit DKC1			6	4.1472208E7	MS/MS	STY:79.9663@AGLES(0.9171)GAEPGDGDS(0.0276)DT(0.0276)T(0.0276)K;
AGLESGAEPGDGDSDTTKK	AGLES[79.9663]GAEPGDGDSDTTKK	K	K	481	499	19	2	5S(79.9663)	sp|O60832|DKC1_HUMAN	O60832	DKC1_HUMAN	DKC1	H/ACA ribonucleoprotein complex subunit DKC1			2	1.35634e+06	MS/MS	STY:79.9663@AGLES(0.3015)GAEPGDGDS(0.3015)DT(0.3015)T(0.0954)KK;
AGLGSPERPPK	AGLGS[79.9663]PERPPK	R	T	54	64	11	2	5S(79.9663)	sp|Q9H6F5|CCD86_HUMAN	Q9H6F5	CCD86_HUMAN	CCDC86	Coiled-coil domain-containing protein 86			2	593611	MS/MS	STY:79.9663@AGLGS(1.0000)PERPPK;
AGMSSNQSISSPVLDAVPR	AGMSSNQSISS[79.9663]PVLDAVPR	K	T	1394	1412	19	2	11S(79.9663)	sp|Q9UQ35|SRRM2_HUMAN	Q9UQ35	SRRM2_HUMAN	SRRM2	Serine/arginine repetitive matrix protein 2			2	3928221	MS/MS	STY:79.9663@AGMS(0.0176)S(0.0176)NQS(0.0180)IS(0.0363)S(0.9104)PVLDAVPR;
AGMSSNQSISSPVLDAVPR	AGMSSNQSIS[79.9663]SPVLDAVPR	K	T	1394	1412	19	3	10S(79.9663)	sp|Q9UQ35|SRRM2_HUMAN	Q9UQ35	SRRM2_HUMAN	SRRM2	Serine/arginine repetitive matrix protein 2			1	893817	MS/MS	STY:79.9663@AGMS(0.0108)S(0.0108)NQS(0.0130)IS(0.4827)S(0.4827)PVLDAVPR;
AGMSSNQSISSPVLDAVPR	AGMS[79.9663]SNQSISSPVLDAVPR	K	T	1394	1412	19	2,3	4S(79.9663)	sp|Q9UQ35|SRRM2_HUMAN	Q9UQ35	SRRM2_HUMAN	SRRM2	Serine/arginine repetitive matrix protein 2			2	4822038	MS/MS	STY:79.9663@AGMS(0.4832)S(0.4832)NQS(0.0112)IS(0.0112)S(0.0112)PVLDAVPR;
AGMSSNQSISSPVLDAVPRTPSR	AGMS[79.9663]S[79.9663]NQSISSPVLDAVPRTPSR	K	E	1394	1416	23	3	4S(79.9663),5S(79.9663)	sp|Q9UQ35|SRRM2_HUMAN	Q9UQ35	SRRM2_HUMAN	SRRM2	Serine/arginine repetitive matrix protein 2			1	522685	MS/MS	STY:79.9663@AGMS(0.5097)S(0.5097)NQS(0.5097)IS(0.0356)S(0.0356)PVLDAVPRT(0.1998)PS(0.1998)R;
AGMTSSPDATTGQTFG	AGMT[79.9663]SSPDATTGQTFG	R	-	779	794	16	2	4T(79.9663)	sp|Q9UQR1|ZN148_HUMAN	Q9UQR1	ZN148_HUMAN	ZNF148	Zinc finger protein 148			1	623696	MS/MS	STY:79.9663@AGMT(0.1667)S(0.1667)S(0.1667)PDAT(0.1667)T(0.1667)GQT(0.1667)FG;
AGMSSNQSISSPVLDAVPR	AGM[15.9949]SSNQS[79.9663]ISSPVLDAVPR	K	T	1394	1412	19	2	3M(15.9949),8S(79.9663)	sp|Q9UQ35|SRRM2_HUMAN	Q9UQ35	SRRM2_HUMAN	SRRM2	Serine/arginine repetitive matrix protein 2			1	1.13659e+06	MS/MS	STY:79.9663@AGMS(0.0148)S(0.0148)NQS(0.8658)IS(0.0523)S(0.0523)PVLDAVPR;M:15.9949@AGM(1.0000)SSNQSISSPVLDAVPR;
AGPEEPGDSPPLR	AGPEEPGDS[79.9663]PPLR	K	H	843	855	13	2	9S(79.9663)	sp|Q12770|SCAP_HUMAN	Q12770	SCAP_HUMAN	SCAP	Sterol regulatory element-binding protein cleavage-activating protein			5	0	MS/MS	STY:79.9663@AGPEEPGDS(1.0000)PPLR;
AGSNEDPILAPSGTPPPTIPPDETFGGR	AGSNEDPILAPSGTPPPT[79.9663]IPPDETFGGR	R	V	732	759	28	3	18T(79.9663)	sp|Q8IZL8|PELP1_HUMAN	Q8IZL8	PELP1_HUMAN	PELP1	Proline-, glutamic acid- and leucine-rich protein 1			1	2.83082e+06	MS/MS	STY:79.9663@AGS(0.0310)NEDPILAPS(0.0213)GT(0.0213)PPPT(0.9121)IPPDET(0.0143)FGGR;
AGSNEDPILAPSGTPPPTIPPDETFGGR	AGSNEDPILAPSGT[79.9663]PPPTIPPDETFGGR	R	V	732	759	28	3	14T(79.9663)	sp|Q8IZL8|PELP1_HUMAN	Q8IZL8	PELP1_HUMAN	PELP1	Proline-, glutamic acid- and leucine-rich protein 1			2	1.0502807E7	MS/MS	STY:79.9663@AGS(0.0179)NEDPILAPS(0.0144)GT(0.9350)PPPT(0.0166)IPPDET(0.0161)FGGR;
AGSNEDPILAPSGTPPPTIPPDETFGGR	AGSNEDPILAPS[79.9663]GTPPPTIPPDETFGGR	R	V	732	759	28	3	12S(79.9663)	sp|Q8IZL8|PELP1_HUMAN	Q8IZL8	PELP1_HUMAN	PELP1	Proline-, glutamic acid- and leucine-rich protein 1			4	1.0502807E7	MS/MS	STY:79.9663@AGS(0.0165)NEDPILAPS(0.7102)GT(0.2404)PPPT(0.0197)IPPDET(0.0131)FGGR;
AGSNEDPILAPSGTPPPTIPPDETFGGR	AGS[79.9663]NEDPILAPSGTPPPTIPPDETFGGR	R	V	732	759	28	3	3S(79.9663)	sp|Q8IZL8|PELP1_HUMAN	Q8IZL8	PELP1_HUMAN	PELP1	Proline-, glutamic acid- and leucine-rich protein 1			2	1.0502807E7	MS/MS	STY:79.9663@AGS(0.4406)NEDPILAPS(0.2604)GT(0.2341)PPPT(0.0353)IPPDET(0.0296)FGGR;
AGSPAPSNR	AGS[79.9663]PAPSNR	K	L	612	620	9	2	3S(79.9663)	sp|Q9BYW2|SETD2_HUMAN	Q9BYW2	SETD2_HUMAN	SETD2	Histone-lysine N-methyltransferase SETD2			1	242378	MS/MS	STY:79.9663@AGS(0.5000)PAPS(0.5000)NR;
AGSSTPGDAPPAVAEVQGR	AGS[79.9663]STPGDAPPAVAEVQGR	R	S	2885	2903	19	2,3	3S(79.9663)	sp|Q7Z6Z7|HUWE1_HUMAN	Q7Z6Z7	HUWE1_HUMAN	HUWE1	E3 ubiquitin-protein ligase HUWE1			2	1.04026e+06	MS/MS	STY:79.9663@AGS(0.4855)S(0.4855)T(0.0291)PGDAPPAVAEVQGR;
AHSDDEK	AHS[79.9663]DDEK	K	W	138	144	7	2	3S(79.9663)	sp|Q8WVC0|LEO1_HUMAN	Q8WVC0	LEO1_HUMAN	LEO1	RNA polymerase-associated protein LEO1			4	496267	MS/MS	STY:79.9663@AHS(1.0000)DDEK;
AHTPTPGIYMGR	AHTPTPGIY[79.9663]MGR	R	P	200	211	12	3	9Y(79.9663)	sp|Q13595|TRA2A_HUMAN	Q13595	TRA2A_HUMAN	TRA2A	Transformer-2 protein homolog alpha			2	304489	MS/MS	STY:79.9663@AHT(0.0422)PT(0.0422)PGIY(0.9156)MGR;
AHTPTPGIYMGR	AHTPT[79.9663]PGIYMGR	R	P	200	211	12	3	5T(79.9663)	sp|Q13595|TRA2A_HUMAN	Q13595	TRA2A_HUMAN	TRA2A	Transformer-2 protein homolog alpha			2	304489	MS/MS	STY:79.9663@AHT(0.0943)PT(0.8787)PGIY(0.0270)MGR;
AHTPTPGIYMGR	AHT[79.9663]PTPGIYMGR	R	P	200	211	12	2,3	3T(79.9663)	sp|Q13595|TRA2A_HUMAN	Q13595	TRA2A_HUMAN	TRA2A	Transformer-2 protein homolog alpha			2	865080	MS/MS	STY:79.9663@AHT(0.9443)PT(0.0280)PGIY(0.0278)MGR;
AIGGIILTASHNPGGPNGDFGIK	AIGGIILT[79.9663]ASHNPGGPNGDFGIK	K	F	108	130	23	3	8T(79.9663)	sp|P36871|PGM1_HUMAN	P36871	PGM1_HUMAN	PGM1	Phosphoglucomutase-1			4	2.23089e+06	MS/MS	STY:79.9663@AIGGIILT(0.9374)AS(0.0626)HNPGGPNGDFGIK;
AIPVSPSAVEEDEDEDGHTVVATAR	AIPVSPSAVEEDEDEDGHT[79.9663]VVATAR	K	G	1613	1637	25	3	19T(79.9663)	sp|Q07157|ZO1_HUMAN	Q07157	ZO1_HUMAN	TJP1	Tight junction protein 1			1	0	MS/MS	STY:79.9663@AIPVS(0.4417)PS(0.0704)AVEEDEDEDGHT(0.4717)VVAT(0.0162)AR;
AIPVSPSAVEEDEDEDGHTVVATAR	AIPVS[79.9663]PSAVEEDEDEDGHTVVATAR	K	G	1613	1637	25	3	5S(79.9663)	sp|Q07157|ZO1_HUMAN	Q07157	ZO1_HUMAN	TJP1	Tight junction protein 1			1	1.0412e+06	MS/MS	STY:79.9663@AIPVS(0.4758)PS(0.4758)AVEEDEDEDGHT(0.0153)VVAT(0.0331)AR;
AISAPTSPTR	AISAPTS[79.9663]PTR	R	L	53	62	10	2	7S(79.9663)	sp|Q9NQG6|MID51_HUMAN	Q9NQG6	MID51_HUMAN	MIEF1	Mitochondrial dynamics protein MIEF1			1	543582	MS/MS	STY:79.9663@AIS(0.0149)APT(0.0128)S(0.4861)PT(0.4861)R;
AISAPTSPTR	AISAPT[79.9663]SPTR	R	L	53	62	10	2	6T(79.9663)	sp|Q9NQG6|MID51_HUMAN	Q9NQG6	MID51_HUMAN	MIEF1	Mitochondrial dynamics protein MIEF1			1	0	MS/MS	STY:79.9663@AIS(0.0124)APT(0.4855)S(0.4855)PT(0.0166)R;
AISAPTSPTR	AIS[79.9663]APTSPTR	R	L	53	62	10	2	3S(79.9663)	sp|Q9NQG6|MID51_HUMAN	Q9NQG6	MID51_HUMAN	MIEF1	Mitochondrial dynamics protein MIEF1			1	543582	MS/MS	STY:79.9663@AIS(0.2500)APT(0.2500)S(0.2500)PT(0.2500)R;
AISSANLLVR	AIS[79.9663]SANLLVR	K	S	174	183	10	2	3S(79.9663)	sp|Q32P44|EMAL3_HUMAN	Q32P44	EMAL3_HUMAN	EML3	Echinoderm microtubule-associated protein-like 3			2	555559	MS/MS	STY:79.9663@AIS(0.8356)S(0.1644)ANLLVR;
AISSDMFFGR	AIS[79.9663]SDMFFGR	K	E	430	439	10	2	3S(79.9663)	sp|Q8N6H7|ARFG2_HUMAN	Q8N6H7	ARFG2_HUMAN	ARFGAP2	ADP-ribosylation factor GTPase-activating protein 2			1	0	MS/MS	STY:79.9663@AIS(0.5000)S(0.5000)DMFFGR;
AITSLLGGGSPK	AITSLLGGGS[79.9663]PK	K	N	2649	2660	12	2	10S(79.9663)	sp|Q6KC79|NIPBL_HUMAN	Q6KC79	NIPBL_HUMAN	NIPBL	Nipped-B-like protein			3	2.64491e+06	MS/MS	STY:79.9663@AIT(0.0349)S(0.0349)LLGGGS(0.9302)PK;
AITSLLGGGSPK	AITS[79.9663]LLGGGSPK	K	N	2649	2660	12	2	4S(79.9663)	sp|Q6KC79|NIPBL_HUMAN	Q6KC79	NIPBL_HUMAN	NIPBL	Nipped-B-like protein			1	1.26831e+06	MS/MS	STY:79.9663@AIT(0.0184)S(0.4908)LLGGGS(0.4908)PK;
AITPPQQPYK	AIT[79.9663]PPQQPYK	K	K	690	699	10	2	3T(79.9663)	sp|Q9NYV4|CDK12_HUMAN	Q9NYV4	CDK12_HUMAN	CDK12	Cyclin-dependent kinase 12			2	1.48229e+06	MS/MS	STY:79.9663@AIT(0.9150)PPQQPY(0.0850)K;
AITSLLGGGSPK	AIT[79.9663]SLLGGGSPK	K	N	2649	2660	12	2	3T(79.9663)	sp|Q6KC79|NIPBL_HUMAN	Q6KC79	NIPBL_HUMAN	NIPBL	Nipped-B-like protein			2	2.64491e+06	MS/MS	STY:79.9663@AIT(0.9408)S(0.0309)LLGGGS(0.0283)PK;
AKPAMPQDSVPSPR	AKPAMPQDSVPS[79.9663]PR	K	S	470	483	14	2	12S(79.9663)	sp|P53396|ACLY_HUMAN	P53396	ACLY_HUMAN	ACLY	ATP-citrate synthase			2	1.02807e+06	MS/MS	STY:79.9663@AKPAMPQDS(0.0553)VPS(0.9447)PR;
AKPAMPQDSVPSPR	AKPAMPQDS[79.9663]VPSPR	K	S	470	483	14	2	9S(79.9663)	sp|P53396|ACLY_HUMAN	P53396	ACLY_HUMAN	ACLY	ATP-citrate synthase			6	901131	MS/MS	STY:79.9663@AKPAMPQDS(0.7766)VPS(0.2234)PR;
AKSPQPPVEEEDEHFDDTVVCLDTYNCDLHFK	AKSPQPPVEEEDEHFDDTVVC[57.0215]LDT[79.9663]YNC[57.0215]DLHFK	R	I	269	300	32	4	21C(57.0215),24T(79.9663),27C(57.0215)	sp|Q00839|HNRPU_HUMAN	Q00839	HNRPU_HUMAN	HNRNPU	Heterogeneous nuclear ribonucleoprotein U			1	3.30617e+06	MS/MS	STY:79.9663@AKS(0.0928)PQPPVEEEDEHFDDT(0.0243)VVCLDT(0.4415)Y(0.4415)NCDLHFK;
AKSPTPESSTIASYVTLR	AKSPTPESS[79.9663]TIASYVTLR	R	K	853	870	18	3	9S(79.9663)	sp|Q9HAU0|PKHA5_HUMAN	Q9HAU0	PKHA5_HUMAN	PLEKHA5	Pleckstrin homology domain-containing family A member 5			1	250480	MS/MS	STY:79.9663@AKS(0.0086)PT(0.0086)PES(0.0086)S(0.1948)T(0.1948)IAS(0.1948)Y(0.1948)VT(0.1948)LR;
AKSPTPESSTIASYVTLR	AKSPTPES[79.9663]STIASYVTLR	R	K	853	870	18	3	8S(79.9663)	sp|Q9HAU0|PKHA5_HUMAN	Q9HAU0	PKHA5_HUMAN	PLEKHA5	Pleckstrin homology domain-containing family A member 5			1	220967	MS/MS	STY:79.9663@AKS(0.0831)PT(0.0831)PES(0.2730)S(0.2730)T(0.2730)IAS(0.0049)Y(0.0049)VT(0.0049)LR;
AKSPQPPVEEEDEHFDDTVVCLDTYNCDLHFK	AKS[79.9663]PQPPVEEEDEHFDDTVVC[57.0215]LDTYNC[57.0215]DLHFK	R	I	269	300	32	4	21C(57.0215),27C(57.0215),3S(79.9663)	sp|Q00839|HNRPU_HUMAN	Q00839	HNRPU_HUMAN	HNRNPU	Heterogeneous nuclear ribonucleoprotein U			3	3.02664e+06	MS/MS	STY:79.9663@AKS(0.8920)PQPPVEEEDEHFDDT(0.0273)VVCLDT(0.0403)Y(0.0403)NCDLHFK;
AKTPVTLK	AKT[79.9663]PVTLK	R	Q	206	213	8	2	3T(79.9663)	sp|P42167|LAP2B_HUMAN	P42167	LAP2B_HUMAN	TMPO	Lamina-associated polypeptide 2, isoforms beta/gamma			5	1.31881e+06	MS/MS	STY:79.9663@AKT(0.9461)PVT(0.0539)LK;
ALAMPGRPESPPVFR	ALAMPGRPES[79.9663]PPVFR	R	S	366	380	15	3	10S(79.9663)	sp|Q63ZY3|KANK2_HUMAN	Q63ZY3	KANK2_HUMAN	KANK2	KN motif and ankyrin repeat domain-containing protein 2			1	219938	MS/MS	STY:79.9663@ALAMPGRPES(1.0000)PPVFR;
ALDSNSLENDDLSAPGR	ALDSNSLENDDLS[79.9663]APGR	K	E	763	779	17	2	13S(79.9663)	sp|Q32MZ4|LRRF1_HUMAN	Q32MZ4	LRRF1_HUMAN	LRRFIP1	Leucine-rich repeat flightless-interacting protein 1			1	0	MS/MS	STY:79.9663@ALDS(0.1260)NS(0.2406)LENDDLS(0.6334)APGR;
ALDVSASDDEIAR	ALDVSAS[79.9663]DDEIAR	K	L	181	193	13	2	7S(79.9663)	sp|P13798|ACPH_HUMAN	P13798	ACPH_HUMAN	APEH	Acylamino-acid-releasing enzyme			1	0	MS/MS	STY:79.9663@ALDVS(0.0965)AS(0.9035)DDEIAR;
ALEEGDGSVSGSSPR	ALEEGDGSVSGS[79.9663]SPR	R	S	420	434	15	2	12S(79.9663)	sp|Q8N3X1|FNBP4_HUMAN	Q8N3X1	FNBP4_HUMAN	FNBP4	Formin-binding protein 4			1	756695	MS/MS	STY:79.9663@ALEEGDGS(0.0129)VS(0.0129)GS(0.4871)S(0.4871)PR;
ALPQTPR	ALPQT[79.9663]PR	K	P	1488	1494	7	2	5T(79.9663)	sp|Q9UQ35|SRRM2_HUMAN	Q9UQ35	SRRM2_HUMAN	SRRM2	Serine/arginine repetitive matrix protein 2			1	632720	MS/MS	STY:79.9663@ALPQT(1.0000)PR;
ALPSLNTGSSSPR	ALPSLNTGSSS[79.9663]PR	R	G	317	329	13	2	11S(79.9663)	sp|O14545|TRAD1_HUMAN	O14545	TRAD1_HUMAN	TRAFD1	TRAF-type zinc finger domain-containing protein 1			2	1.83101e+06	MS/MS	STY:79.9663@ALPS(0.0149)LNT(0.0174)GS(0.0174)S(0.0174)S(0.9329)PR;
ALPSEDEEGQDDK	ALPS[79.9663]EDEEGQDDK	R	D	8302	8314	13	2	4S(79.9663)	sp|Q8NF91|SYNE1_HUMAN	Q8NF91	SYNE1_HUMAN	SYNE1	Nesprin-1			1	791750	MS/MS	STY:79.9663@ALPS(1.0000)EDEEGQDDK;
ALPSLNTGSSSPR	ALPS[79.9663]LNTGSSSPR	R	G	317	329	13	2	4S(79.9663)	sp|O14545|TRAD1_HUMAN	O14545	TRAD1_HUMAN	TRAFD1	TRAF-type zinc finger domain-containing protein 1			2	1.83101e+06	MS/MS	STY:79.9663@ALPS(0.9345)LNT(0.0167)GS(0.0163)S(0.0163)S(0.0163)PR;
ALQAPHSPSK	ALQAPHSPS[79.9663]K	R	T	37	46	10	2	9S(79.9663)	sp|Q96AQ6|PBIP1_HUMAN	Q96AQ6	PBIP1_HUMAN	PBXIP1	Pre-B-cell leukemia transcription factor-interacting protein 1			1	457983	MS/MS	STY:79.9663@ALQAPHS(0.0777)PS(0.9223)K;
ALQAPHSPSK	ALQAPHS[79.9663]PSK	R	T	37	46	10	2	7S(79.9663)	sp|Q96AQ6|PBIP1_HUMAN	Q96AQ6	PBIP1_HUMAN	PBXIP1	Pre-B-cell leukemia transcription factor-interacting protein 1			4	457983	MS/MS	STY:79.9663@ALQAPHS(0.7701)PS(0.2299)K;
ALSSDSILSPAPDAR	ALSSDS[79.9663]ILSPAPDAR	R	A	392	406	15	2	6S(79.9663)	sp|Q8IVT2|MISP_HUMAN	Q8IVT2	MISP_HUMAN	MISP	Mitotic interactor and substrate of PLK1			1	0	MS/MS	STY:79.9663@ALS(0.0182)S(0.0182)DS(0.4818)ILS(0.4818)PAPDAR;
ALSSGGSITSPPLSPALPK	ALSSGGSITSPPLS[79.9663]PALPK	R	Y	17	35	19	2	14S(79.9663)	sp|Q6Y7W6|GGYF2_HUMAN	Q6Y7W6	GGYF2_HUMAN	GIGYF2	GRB10-interacting GYF protein 2			1	3.89167e+06	MS/MS	STY:79.9663@ALS(0.0170)S(0.0170)GGS(0.0114)IT(0.0200)S(0.0200)PPLS(0.9146)PALPK;
ALSSGGSITSPPLSPALPK	ALSSGGSITS[79.9663]PPLSPALPK	R	Y	17	35	19	2	10S(79.9663)	sp|Q6Y7W6|GGYF2_HUMAN	Q6Y7W6	GGYF2_HUMAN	GIGYF2	GRB10-interacting GYF protein 2			2	3.89167e+06	MS/MS	STY:79.9663@ALS(0.0120)S(0.0120)GGS(0.0123)IT(0.0186)S(0.9339)PPLS(0.0113)PALPK;
ALSSGGSITSPPLSPALPK	ALSSGGSIT[79.9663]SPPLSPALPK	R	Y	17	35	19	2	9T(79.9663)	sp|Q6Y7W6|GGYF2_HUMAN	Q6Y7W6	GGYF2_HUMAN	GIGYF2	GRB10-interacting GYF protein 2			2	3.89167e+06	MS/MS	STY:79.9663@ALS(0.0057)S(0.0057)GGS(0.0057)IT(0.3383)S(0.3383)PPLS(0.3061)PALPK;
ALSSLHGDDQDSEDEVLTIPEVK	ALSSLHGDDQDS[79.9663]EDEVLTIPEVK	K	V	2398	2420	23	3	12S(79.9663)	sp|P11717|MPRI_HUMAN	P11717	MPRI_HUMAN	IGF2R	Cation-independent mannose-6-phosphate receptor			4	7356880	MS/MS	STY:79.9663@ALS(0.0206)S(0.0265)LHGDDQDS(0.9315)EDEVLT(0.0215)IPEVK;
ALSPAELR	ALS[79.9663]PAELR	R	A	1484	1491	8	2	3S(79.9663)	sp|Q14160|SCRIB_HUMAN	Q14160	SCRIB_HUMAN	SCRIB	Protein scribble homolog			1	252402	MS/MS	STY:79.9663@ALS(1.0000)PAELR;
ALSSLHGDDQDSEDEVLTIPEVK	ALS[79.9663]SLHGDDQDSEDEVLTIPEVK	K	V	2398	2420	23	3	3S(79.9663)	sp|P11717|MPRI_HUMAN	P11717	MPRI_HUMAN	IGF2R	Cation-independent mannose-6-phosphate receptor			1	4020106	MS/MS	STY:79.9663@ALS(0.2966)S(0.2966)LHGDDQDS(0.1624)EDEVLT(0.2443)IPEVK;
ALTYTQSAPDLSPQILTPPVICSSCGR	ALTYTQSAPDLSPQILT[79.9663]PPVIC[57.0215]SSC[57.0215]GR	R	P	564	590	27	3	17T(79.9663),22C(57.0215),25C(57.0215)	sp|Q14432|PDE3A_HUMAN	Q14432	PDE3A_HUMAN	PDE3A	cGMP-inhibited 3',5'-cyclic phosphodiesterase 3A			1	1.40836e+06	MS/MS	STY:79.9663@ALT(0.0124)Y(0.0139)T(0.0139)QS(0.0139)APDLS(0.0139)PQILT(0.9152)PPVICS(0.0084)S(0.0083)CGR;
ALTYTQSAPDLSPQILTPPVICSSCGR	ALTYTQS[79.9663]APDLSPQILTPPVIC[57.0215]SSC[57.0215]GR	R	P	564	590	27	3	22C(57.0215),25C(57.0215),7S(79.9663)	sp|Q14432|PDE3A_HUMAN	Q14432	PDE3A_HUMAN	PDE3A	cGMP-inhibited 3',5'-cyclic phosphodiesterase 3A			1	1.40836e+06	MS/MS	STY:79.9663@ALT(0.1686)Y(0.1686)T(0.1686)QS(0.2253)APDLS(0.0034)PQILT(0.0886)PPVICS(0.0886)S(0.0886)CGR;
ALVATPGKK	ALVAT[79.9663]PGKK	K	G	117	125	9	2	5T(79.9663)	sp|P19338|NUCL_HUMAN	P19338	NUCL_HUMAN	NCL	Nucleolin			5	1.36359e+06	MS/MS	STY:79.9663@ALVAT(1.0000)PGKK;
ALVEFESNPEETREPGSPPSVQR	ALVEFESNPEETREPGSPPS[79.9663]VQR	R	A	31	53	23	3	20S(79.9663)	sp|Q9H6F5|CCD86_HUMAN	Q9H6F5	CCD86_HUMAN	CCDC86	Coiled-coil domain-containing protein 86			1	1.31109e+06	MS/MS	STY:79.9663@ALVEFES(0.0200)NPEET(0.0201)REPGS(0.0562)PPS(0.9038)VQR;
ALVEFESNPEETREPGSPPSVQR	ALVEFESNPEETREPGS[79.9663]PPSVQR	R	A	31	53	23	3	17S(79.9663)	sp|Q9H6F5|CCD86_HUMAN	Q9H6F5	CCD86_HUMAN	CCDC86	Coiled-coil domain-containing protein 86			4	4039776	MS/MS	STY:79.9663@ALVEFES(0.3551)NPEET(0.1128)REPGS(0.5025)PPS(0.0296)VQR;
ALVEFESNPEETREPGSPPSVQR	ALVEFES[79.9663]NPEETREPGSPPSVQR	R	A	31	53	23	3	7S(79.9663)	sp|Q9H6F5|CCD86_HUMAN	Q9H6F5	CCD86_HUMAN	CCDC86	Coiled-coil domain-containing protein 86			1	2.34392e+06	MS/MS	STY:79.9663@ALVEFES(0.2500)NPEET(0.2500)REPGS(0.2500)PPS(0.2500)VQR;
ALVVPEPEPDSDSNQER	ALVVPEPEPDSDS[79.9663]NQER	K	K	126	142	17	2	13S(79.9663)	sp|Q5VTR2|BRE1A_HUMAN	Q5VTR2	BRE1A_HUMAN	RNF20	E3 ubiquitin-protein ligase BRE1A			1	2.97654e+06	MS/MS	STY:79.9663@ALVVPEPEPDS(0.1365)DS(0.8635)NQER;
ALVVPEPEPDSDSNQER	ALVVPEPEPDS[79.9663]DSNQER	K	K	126	142	17	2,3	11S(79.9663)	sp|Q5VTR2|BRE1A_HUMAN	Q5VTR2	BRE1A_HUMAN	RNF20	E3 ubiquitin-protein ligase BRE1A			4	3.5142e+06	MS/MS	STY:79.9663@ALVVPEPEPDS(0.5000)DS(0.5000)NQER;
AMADELSEK	AMADELS[79.9663]EK	K	Q	31	39	9	2	7S(79.9663)	sp|Q03135|CAV1_HUMAN	Q03135	CAV1_HUMAN	CAV1	Caveolin-1			3	2902895	MS/MS	STY:79.9663@AMADELS(1.0000)EK;
AMSTTSISSPQPGK	AMSTTSISS[79.9663]PQPGK	R	L	267	280	14	2	9S(79.9663)	sp|Q9UJU6|DBNL_HUMAN	Q9UJU6	DBNL_HUMAN	DBNL	Drebrin-like protein			1	0	MS/MS	STY:79.9663@AMS(0.0458)T(0.0458)T(0.0458)S(0.0458)IS(0.0458)S(0.7712)PQPGK;
AMSTTSISSPQPGK	AMS[79.9663]TTSISSPQPGK	R	L	267	280	14	2	3S(79.9663)	sp|Q9UJU6|DBNL_HUMAN	Q9UJU6	DBNL_HUMAN	DBNL	Drebrin-like protein			1	405973	MS/MS	STY:79.9663@AMS(0.4822)T(0.4822)T(0.0092)S(0.0088)IS(0.0088)S(0.0088)PQPGK;
AMHLSQLDMILDQTK	AM[15.9949]HLSQLDM[15.9949]ILDQT[79.9663]K	K	T	898	912	15	2	14T(79.9663),2M(15.9949),9M(15.9949)	sp|Q5T9S5|CCD18_HUMAN	Q5T9S5	CCD18_HUMAN	CCDC18	Coiled-coil domain-containing protein 18			1	394136	MS/MS	STY:79.9663@AMHLS(0.4634)QLDMILDQT(0.5366)K;M:15.9949@AM(1.0000)HLSQLDM(1.0000)ILDQTK;
AMHLSQLDMILDQTK	AM[15.9949]HLS[79.9663]QLDM[15.9949]ILDQTK	K	T	898	912	15	2	2M(15.9949),5S(79.9663),9M(15.9949)	sp|Q5T9S5|CCD18_HUMAN	Q5T9S5	CCD18_HUMAN	CCDC18	Coiled-coil domain-containing protein 18			1	494887	MS/MS	STY:79.9663@AMHLS(0.8984)QLDMILDQT(0.1016)K;M:15.9949@AM(1.0000)HLSQLDM(1.0000)ILDQTK;
ANSFVGTAQYVSPELLTEK	ANS[79.9663]FVGTAQYVSPELLTEK	R	S	239	257	19	2	3S(79.9663)	sp|O15530|PDPK1_HUMAN	O15530	PDPK1_HUMAN	PDPK1	3-phosphoinositide-dependent protein kinase 1	PDPK2P	sp|Q6A1A2|PDPK2_HUMAN	1	0	MS/MS	STY:79.9663@ANS(0.8560)FVGT(0.0978)AQY(0.0154)VS(0.0154)PELLT(0.0154)EK;
APAGQEEPGTPPSSPLSAEQLDR	APAGQEEPGT[79.9663]PPSSPLSAEQLDR	K	I	51	73	23	3	10T(79.9663)	sp|P13051|UNG_HUMAN	P13051	UNG_HUMAN	UNG	Uracil-DNA glycosylase			2	304723	MS/MS	STY:79.9663@APAGQEEPGT(0.3676)PPS(0.3676)S(0.1324)PLS(0.1324)AEQLDR;
APESPPSADPALVAGPAEEAECPPPR	APES[79.9663]PPSADPALVAGPAEEAEC[57.0215]PPPR	R	Q	7	32	26	3	22C(57.0215),4S(79.9663)	sp|Q6EEV4|GL1AD_HUMAN	Q6EEV4	GL1AD_HUMAN	POLR2M	DNA-directed RNA polymerase II subunit GRINL1A, isoforms 4/5			1	449946	MS/MS	STY:79.9663@APES(0.5000)PPS(0.5000)ADPALVAGPAEEAECPPPR;
APGSPAAPR	APGS[79.9663]PAAPR	K	I	226	234	9	2	4S(79.9663)	sp|Q9NQX5|NPDC1_HUMAN	Q9NQX5	NPDC1_HUMAN	NPDC1	Neural proliferation differentiation and control protein 1			2	481443	MS/MS	STY:79.9663@APGS(1.0000)PAAPR;
APGYPSSPVTTASGTTLR	APGYPSSPVTT[79.9663]ASGTTLR	R	L	2513	2530	18	2	11T(79.9663)	sp|Q9HCK8|CHD8_HUMAN	Q9HCK8	CHD8_HUMAN	CHD8	Chromodomain-helicase-DNA-binding protein 8			1	0	MS/MS	STY:79.9663@APGY(0.0068)PS(0.0078)S(0.0078)PVT(0.0078)T(0.4740)AS(0.4740)GT(0.0149)T(0.0070)LR;
APGYPSSPVTTASGTTLR	APGYPSSPVT[79.9663]TASGTTLR	R	L	2513	2530	18	2	10T(79.9663)	sp|Q9HCK8|CHD8_HUMAN	Q9HCK8	CHD8_HUMAN	CHD8	Chromodomain-helicase-DNA-binding protein 8			1	0	MS/MS	STY:79.9663@APGY(0.0084)PS(0.0084)S(0.0135)PVT(0.4690)T(0.4690)AS(0.0111)GT(0.0111)T(0.0094)LR;
APIDTSDVEEK	APIDTS[79.9663]DVEEK	K	A	301	311	11	2	6S(79.9663)	sp|Q06265|EXOS9_HUMAN	Q06265	EXOS9_HUMAN	EXOSC9	Exosome complex component RRP45			3	1.2609379E7	MS/MS	STY:79.9663@APIDT(0.0541)S(0.9459)DVEEK;
APIDTSDVEEK	APIDT[79.9663]SDVEEK	K	A	301	311	11	2	5T(79.9663)	sp|Q06265|EXOS9_HUMAN	Q06265	EXOS9_HUMAN	EXOSC9	Exosome complex component RRP45			6	1.2609379E7	MS/MS	STY:79.9663@APIDT(0.8916)S(0.1084)DVEEK;
APQTSSSPPPVR	APQTSSS[79.9663]PPPVR	R	R	690	701	12	2	7S(79.9663)	sp|Q8IYB3|SRRM1_HUMAN	Q8IYB3	SRRM1_HUMAN	SRRM1	Serine/arginine repetitive matrix protein 1			6	2.707214E7	MS/MS	STY:79.9663@APQT(0.0197)S(0.0197)S(0.0197)S(0.9409)PPPVR;
APQTSSSPPPVR	APQTSS[79.9663]SPPPVR	R	R	690	701	12	2	6S(79.9663)	sp|Q8IYB3|SRRM1_HUMAN	Q8IYB3	SRRM1_HUMAN	SRRM1	Serine/arginine repetitive matrix protein 1			7	2.6134738E7	MS/MS	STY:79.9663@APQT(0.0302)S(0.0302)S(0.9004)S(0.0393)PPPVR;
APQTSSSPPPVR	APQTS[79.9663]SSPPPVR	R	R	690	701	12	2	5S(79.9663)	sp|Q8IYB3|SRRM1_HUMAN	Q8IYB3	SRRM1_HUMAN	SRRM1	Serine/arginine repetitive matrix protein 1			6	5.82566e+06	MS/MS	STY:79.9663@APQT(0.0215)S(0.9305)S(0.0240)S(0.0240)PPPVR;
APQTSSSPPPVR	APQT[79.9663]SSSPPPVR	R	R	690	701	12	2	4T(79.9663)	sp|Q8IYB3|SRRM1_HUMAN	Q8IYB3	SRRM1_HUMAN	SRRM1	Serine/arginine repetitive matrix protein 1			25	2.707214E7	MS/MS	STY:79.9663@APQT(0.9214)S(0.0262)S(0.0262)S(0.0262)PPPVR;
APSPAPSSVPLGSEK	APSPAPSSVPLGS[79.9663]EK	R	P	2399	2413	15	2	13S(79.9663)	sp|O75179|ANR17_HUMAN	O75179	ANR17_HUMAN	ANKRD17	Ankyrin repeat domain-containing protein 17			1	1.75609e+06	MS/MS	STY:79.9663@APS(0.1183)PAPS(0.1183)S(0.1448)VPLGS(0.6186)EK;
APSVANVGSHCDLSLK	APSVANVGS[79.9663]HC[57.0215]DLSLK	R	I	2150	2165	16	2	11C(57.0215),9S(79.9663)	sp|P21333|FLNA_HUMAN	P21333	FLNA_HUMAN	FLNA	Filamin-A			3	2471240	MS/MS	STY:79.9663@APS(0.1190)VANVGS(0.8471)HCDLS(0.0340)LK;
APSPAPSSVPLGSEK	APS[79.9663]PAPSSVPLGSEK	R	P	2399	2413	15	2	3S(79.9663)	sp|O75179|ANR17_HUMAN	O75179	ANR17_HUMAN	ANKRD17	Ankyrin repeat domain-containing protein 17			4	1.75609e+06	MS/MS	STY:79.9663@APS(0.9371)PAPS(0.0210)S(0.0210)VPLGS(0.0210)EK;
APSPPLSQVFQTR	APS[79.9663]PPLSQVFQTR	R	A	562	574	13	2	3S(79.9663)	sp|Q9NRA8|4ET_HUMAN	Q9NRA8	4ET_HUMAN	EIF4ENIF1	Eukaryotic translation initiation factor 4E transporter			2	755954	MS/MS	STY:79.9663@APS(0.9416)PPLS(0.0292)QVFQT(0.0292)R;
APSPTAEQPPGGGDSAR	APS[79.9663]PTAEQPPGGGDSAR	R	R	4	20	17	2	3S(79.9663)	sp|Q15742|NAB2_HUMAN	Q15742	NAB2_HUMAN	NAB2	NGFI-A-binding protein 2			1	448148	MS/MS	STY:79.9663@APS(0.3600)PT(0.3600)AEQPPGGGDS(0.2799)AR;
APSVANVGSHCDLSLK	APS[79.9663]VANVGSHC[57.0215]DLSLK	R	I	2150	2165	16	2	11C(57.0215),3S(79.9663)	sp|P21333|FLNA_HUMAN	P21333	FLNA_HUMAN	FLNA	Filamin-A			14	2868735	MS/MS	STY:79.9663@APS(0.9446)VANVGS(0.0279)HCDLS(0.0275)LK;
APTPPGK	APT[79.9663]PPGK	K	G	327	333	7	2	3T(79.9663)	sp|Q12893|TM115_HUMAN	Q12893	TM115_HUMAN	TMEM115	Transmembrane protein 115			3	1.10647e+06	MS/MS	STY:79.9663@APT(1.0000)PPGK;
APVGSVVSVPSQSSASSDK	APVGSVVSVPS[79.9663]QSSASSDK	K	Y	355	373	19	2	11S(79.9663)	sp|P52594|AGFG1_HUMAN	P52594	AGFG1_HUMAN	AGFG1	Arf-GAP domain and FG repeat-containing protein 1			1	468786	MS/MS	STY:79.9663@APVGS(0.0068)VVS(0.0053)VPS(0.3252)QS(0.3252)S(0.3252)AS(0.0061)S(0.0061)DK;
APVPGTPDSLSSGSSR	APVPGTPDSLSSGS[79.9663]SR	K	D	322	337	16	2	14S(79.9663)	sp|Q9UJZ1|STML2_HUMAN	Q9UJZ1	STML2_HUMAN	STOML2	Stomatin-like protein 2, mitochondrial			1	846768	MS/MS	STY:79.9663@APVPGT(0.0326)PDS(0.0326)LS(0.0326)S(0.0326)GS(0.4347)S(0.4347)R;
APVPGTPDSLSSGSSR	APVPGTPDS[79.9663]LSSGSSR	K	D	322	337	16	2	9S(79.9663)	sp|Q9UJZ1|STML2_HUMAN	Q9UJZ1	STML2_HUMAN	STOML2	Stomatin-like protein 2, mitochondrial			2	2.53317e+06	MS/MS	STY:79.9663@APVPGT(0.2156)PDS(0.3607)LS(0.3607)S(0.0210)GS(0.0210)S(0.0210)R;
APVPGTPDSLSSGSSR	APVPGT[79.9663]PDSLSSGSSR	K	D	322	337	16	2	6T(79.9663)	sp|Q9UJZ1|STML2_HUMAN	Q9UJZ1	STML2_HUMAN	STOML2	Stomatin-like protein 2, mitochondrial			1	1.6864e+06	MS/MS	STY:79.9663@APVPGT(0.9419)PDS(0.0115)LS(0.0115)S(0.0115)GS(0.0118)S(0.0118)R;
APVPSTCSSTFPEELSPPSHQAK	APVPSTC[57.0215]SSTFPEELSPPS[79.9663]HQAK	K	R	154	176	23	3	19S(79.9663),7C(57.0215)	sp|Q14980|NUMA1_HUMAN	Q14980	NUMA1_HUMAN	NUMA1	Nuclear mitotic apparatus protein 1			2	2.20634e+06	MS/MS	STY:79.9663@APVPS(0.0097)T(0.0097)CS(0.0097)S(0.0097)T(0.0097)FPEELS(0.0183)PPS(0.9334)HQAK;
APVPSTCSSTFPEELSPPSHQAK	APVPSTC[57.0215]SSTFPEELS[79.9663]PPSHQAK	K	R	154	176	23	3	16S(79.9663),7C(57.0215)	sp|Q14980|NUMA1_HUMAN	Q14980	NUMA1_HUMAN	NUMA1	Nuclear mitotic apparatus protein 1			8	3351669	MS/MS	STY:79.9663@APVPS(0.0121)T(0.0121)CS(0.0121)S(0.0121)T(0.0121)FPEELS(0.9292)PPS(0.0102)HQAK;
APVPSTCSSTFPEELSPPSHQAK	APVPS[79.9663]TC[57.0215]SSTFPEELSPPSHQAK	K	R	154	176	23	3	5S(79.9663),7C(57.0215)	sp|Q14980|NUMA1_HUMAN	Q14980	NUMA1_HUMAN	NUMA1	Nuclear mitotic apparatus protein 1			1	1063431	MS/MS	STY:79.9663@APVPS(0.1931)T(0.1931)CS(0.1931)S(0.1931)T(0.1931)FPEELS(0.0080)PPS(0.0266)HQAK;
APVQPQQSPAAAPGGTDEK	APVQPQQSPAAAPGGT[79.9663]DEK	K	P	9	27	19	3	16T(79.9663)	sp|Q13200|PSMD2_HUMAN	Q13200	PSMD2_HUMAN	PSMD2	26S proteasome non-ATPase regulatory subunit 2			1	466390	MS/MS	STY:79.9663@APVQPQQS(0.1028)PAAAPGGT(0.8972)DEK;
APVSSTESVIQSNTPTPPPSQPLNETAEEESR	APVSSTESVIQSNTPTPPPS[79.9663]QPLNETAEEESR	K	I	884	915	32	3	20S(79.9663)	sp|Q9HC35|EMAL4_HUMAN	Q9HC35	EMAL4_HUMAN	EML4	Echinoderm microtubule-associated protein-like 4			1	0	MS/MS	STY:79.9663@APVS(0.0269)S(0.0269)T(0.0269)ES(0.0269)VIQS(0.0097)NT(0.0139)PT(0.0139)PPPS(0.8402)QPLNET(0.0074)AEEES(0.0074)R;
APVSSTESVIQSNTPTPPPSQPLNETAEEESR	APVSSTESVIQS[79.9663]NTPTPPPSQPLNETAEEESR	K	I	884	915	32	3	12S(79.9663)	sp|Q9HC35|EMAL4_HUMAN	Q9HC35	EMAL4_HUMAN	EML4	Echinoderm microtubule-associated protein-like 4			1	0	MS/MS	STY:79.9663@APVS(0.0058)S(0.0058)T(0.0058)ES(0.0058)VIQS(0.4869)NT(0.0131)PT(0.0131)PPPS(0.4219)QPLNET(0.0222)AEEES(0.0197)R;
AQAVSEEEEEEEGK	AQAVS[79.9663]EEEEEEEGK	K	S	78	91	14	2	5S(79.9663)	sp|Q9GZR7|DDX24_HUMAN	Q9GZR7	DDX24_HUMAN	DDX24	ATP-dependent RNA helicase DDX24			8	9303586	MS/MS	STY:79.9663@AQAVS(1.0000)EEEEEEEGK;
AQGEPVAGHESPK	AQGEPVAGHES[79.9663]PK	R	I	789	801	13	2,3	11S(79.9663)	sp|O94979|SC31A_HUMAN	O94979	SC31A_HUMAN	SEC31A	Protein transport protein Sec31A			19	2748458	MS/MS	STY:79.9663@AQGEPVAGHES(1.0000)PK;
AQGEPVAGHESPKIPYEK	AQGEPVAGHES[79.9663]PKIPYEK	R	Q	789	806	18	3	11S(79.9663)	sp|O94979|SC31A_HUMAN	O94979	SC31A_HUMAN	SEC31A	Protein transport protein Sec31A			2	656850	MS/MS	STY:79.9663@AQGEPVAGHES(0.5000)PKIPY(0.5000)EK;
AQLEPVASPAK	AQLEPVAS[79.9663]PAK	K	K	1428	1438	11	2	8S(79.9663)	sp|Q15149|PLEC_HUMAN	Q15149	PLEC_HUMAN	PLEC	Plectin			5	2.82083e+06	MS/MS	STY:79.9663@AQLEPVAS(1.0000)PAK;
AQQELVPPQQQASPPQLPK	AQQELVPPQQQAS[79.9663]PPQLPK	R	A	1057	1075	19	3	13S(79.9663)	sp|O15027|SC16A_HUMAN	O15027	SC16A_HUMAN	SEC16A	Protein transport protein Sec16A			2	1.07328e+06	MS/MS	STY:79.9663@AQQELVPPQQQAS(1.0000)PPQLPK;
AQSLVISPPAPSPR	AQSLVISPPAPS[79.9663]PR	K	K	573	586	14	2	12S(79.9663)	sp|P46013|KI67_HUMAN	P46013	KI67_HUMAN	MKI67	Proliferation marker protein Ki-67			2	1242180	MS/MS	STY:79.9663@AQS(0.0537)LVIS(0.0370)PPAPS(0.9094)PR;
AQSLVISPPAPSPR	AQSLVIS[79.9663]PPAPSPR	K	K	573	586	14	2	7S(79.9663)	sp|P46013|KI67_HUMAN	P46013	KI67_HUMAN	MKI67	Proliferation marker protein Ki-67			1	1242180	MS/MS	STY:79.9663@AQS(0.0324)LVIS(0.4838)PPAPS(0.4838)PR;
AQSSPAAPASLSAPEPASQAR	AQS[79.9663]SPAAPASLSAPEPASQAR	R	V	484	504	21	2,3	3S(79.9663)	sp|Q8WUI4|HDAC7_HUMAN	Q8WUI4	HDAC7_HUMAN	HDAC7	Histone deacetylase 7			3	478501	MS/MS	STY:79.9663@AQS(0.4819)S(0.4819)PAAPAS(0.0137)LS(0.0127)APEPAS(0.0097)QAR;
AQSSPASATFPVSVQEPPTK	AQS[79.9663]SPASATFPVSVQEPPTK	R	P	630	649	20	2	3S(79.9663)	sp|P56524|HDAC4_HUMAN	P56524	HDAC4_HUMAN	HDAC4	Histone deacetylase 4			2	1.08974e+06	MS/MS	STY:79.9663@AQS(0.2456)S(0.2456)PAS(0.2456)AT(0.2456)FPVS(0.0049)VQEPPT(0.0128)K;
AQSTDSLGTSGSLQSK	AQS[79.9663]TDSLGTSGSLQSK	R	A	405	420	16	2	3S(79.9663)	sp|Q15276|RABE1_HUMAN	Q15276	RABE1_HUMAN	RABEP1	Rab GTPase-binding effector protein 1			1	793900	MS/MS	STY:79.9663@AQS(0.9354)T(0.0114)DS(0.0114)LGT(0.0114)S(0.0101)GS(0.0101)LQS(0.0101)K;
AQTPPGPSLSGSK	AQTPPGPSLSGS[79.9663]K	K	S	1001	1013	13	2	12S(79.9663)	sp|Q9UQ35|SRRM2_HUMAN	Q9UQ35	SRRM2_HUMAN	SRRM2	Serine/arginine repetitive matrix protein 2			1	9933160	MS/MS	STY:79.9663@AQT(0.0253)PPGPS(0.0253)LS(0.0263)GS(0.9231)K;
AQTPPGPSLSGSK	AQTPPGPS[79.9663]LSGSK	K	S	1001	1013	13	2	8S(79.9663)	sp|Q9UQ35|SRRM2_HUMAN	Q9UQ35	SRRM2_HUMAN	SRRM2	Serine/arginine repetitive matrix protein 2			2	9933160	MS/MS	STY:79.9663@AQT(0.1052)PPGPS(0.8341)LS(0.0304)GS(0.0304)K;
AQTPPGPSLSGSK	AQT[79.9663]PPGPSLSGSK	K	S	1001	1013	13	2	3T(79.9663)	sp|Q9UQ35|SRRM2_HUMAN	Q9UQ35	SRRM2_HUMAN	SRRM2	Serine/arginine repetitive matrix protein 2			22	3.4514464E7	MS/MS	STY:79.9663@AQT(0.9447)PPGPS(0.0184)LS(0.0184)GS(0.0184)K;
AQTPPGPSLSGSKSPCPQEK	AQT[79.9663]PPGPS[79.9663]LSGSKSPC[57.0215]PQEK	K	S	1001	1020	20	3	16C(57.0215),3T(79.9663),8S(79.9663)	sp|Q9UQ35|SRRM2_HUMAN	Q9UQ35	SRRM2_HUMAN	SRRM2	Serine/arginine repetitive matrix protein 2			1	545395	MS/MS	STY:79.9663@AQT(0.5382)PPGPS(0.5382)LS(0.3078)GS(0.3078)KS(0.3078)PCPQEK;
AQVPGPLTPEMEAR	AQVPGPLT[79.9663]PEMEAR	K	Q	600	613	14	2	8T(79.9663)	sp|Q9H8Y5|ANKZ1_HUMAN	Q9H8Y5	ANKZ1_HUMAN	ANKZF1	tRNA endonuclease ANKZF1			1	0	MS/MS	STY:79.9663@AQVPGPLT(1.0000)PEMEAR;
ARSPTDDK	ARS[79.9663]PTDDK	K	V	255	262	8	2	3S(79.9663)	sp|Q13523|PRP4K_HUMAN	Q13523	PRP4K_HUMAN	PRP4K	Serine/threonine-protein kinase PRP4 homolog			5	1.62696e+06	MS/MS	STY:79.9663@ARS(0.5000)PT(0.5000)DDK;
ARSVSPPPK	ARS[79.9663]VS[79.9663]PPPK	K	R	312	320	9	2	3S(79.9663),5S(79.9663)	sp|Q13247|SRSF6_HUMAN	Q13247	SRSF6_HUMAN	SRSF6	Serine/arginine-rich splicing factor 6			1	559033	MS/MS	STY:79.9663@ARS(1.0000)VS(1.0000)PPPK;
ASASGSGAQVGGPISSGSSASSVTVTR	ASASGSGAQVGGPIS[79.9663]SGSSASSVTVTR	K	S	598	624	27	3	15S(79.9663)	sp|P02545|LMNA_HUMAN	P02545	LMNA_HUMAN	LMNA	Prelamin-A/C			1	414292	MS/MS	STY:79.9663@AS(0.0129)AS(0.0188)GS(0.0188)GAQVGGPIS(0.1884)S(0.1884)GS(0.1884)S(0.1884)AS(0.1884)S(0.0025)VT(0.0025)VT(0.0025)R;
ASAVSELSPR	ASAVSELS[79.9663]PR	R	E	236	245	10	2	8S(79.9663)	sp|Q9Y2W1|TR150_HUMAN	Q9Y2W1	TR150_HUMAN	THRAP3	Thyroid hormone receptor-associated protein 3			10	3.1100526E7	MS/MS	STY:79.9663@AS(0.0274)AVS(0.0282)ELS(0.9444)PR;
ASAVSELSPR	ASAVS[79.9663]ELSPR	R	E	236	245	10	2	5S(79.9663)	sp|Q9Y2W1|TR150_HUMAN	Q9Y2W1	TR150_HUMAN	THRAP3	Thyroid hormone receptor-associated protein 3			7	3.1100526E7	MS/MS	STY:79.9663@AS(0.0298)AVS(0.9428)ELS(0.0274)PR;
ASDPDEAGGPEGSEAVQSGTPEEPEPELEAEASK	ASDPDEAGGPEGSEAVQS[79.9663]GTPEEPEPELEAEASK	R	E	130	163	34	3	18S(79.9663)	sp|O60936|NOL3_HUMAN	O60936	NOL3_HUMAN	NOL3	Nucleolar protein 3			2	0	MS/MS	STY:79.9663@AS(0.0113)DPDEAGGPEGS(0.0202)EAVQS(0.4764)GT(0.4764)PEEPEPELEAEAS(0.0158)K;
ASEDTTSGSPPK	ASEDTTSGS[79.9663]PPK	R	K	456	467	12	2	9S(79.9663)	sp|Q9BZZ5|API5_HUMAN	Q9BZZ5	API5_HUMAN	API5	Apoptosis inhibitor 5			2	830874	MS/MS	STY:79.9663@AS(0.0352)EDT(0.0204)T(0.0204)S(0.0204)GS(0.9036)PPK;
ASEDTTSGSPPK	ASEDT[79.9663]TSGSPPK	R	K	456	467	12	2	5T(79.9663)	sp|Q9BZZ5|API5_HUMAN	Q9BZZ5	API5_HUMAN	API5	Apoptosis inhibitor 5			2	830874	MS/MS	STY:79.9663@AS(0.0146)EDT(0.9250)T(0.0202)S(0.0202)GS(0.0202)PPK;
ASEDTTSGSPPKK	ASEDT[79.9663]TSGSPPKK	R	S	456	468	13	2	5T(79.9663)	sp|Q9BZZ5|API5_HUMAN	Q9BZZ5	API5_HUMAN	API5	Apoptosis inhibitor 5			1	1.60368e+06	MS/MS	STY:79.9663@AS(0.0056)EDT(0.2486)T(0.2486)S(0.2486)GS(0.2486)PPKK;
ASGDPGASGMSPR	ASGDPGAS[79.9663]GMSPR	K	A	99	111	13	2	8S(79.9663)	sp|Q8NDT2|RB15B_HUMAN	Q8NDT2	RB15B_HUMAN	RBM15B	Putative RNA-binding protein 15B			1	416855	MS/MS	STY:79.9663@AS(0.0267)GDPGAS(0.7621)GMS(0.2112)PR;
ASGQAFELILSPR	ASGQAFELILS[79.9663]PR	R	S	15	27	13	2	11S(79.9663)	sp|P16949|STMN1_HUMAN	P16949	STMN1_HUMAN	STMN1	Stathmin			4	5.40627e+06	MS/MS	STY:79.9663@AS(0.0750)GQAFELILS(0.9250)PR;
ASIANSDGPTAGSQTPPFK	ASIANSDGPTAGSQT[79.9663]PPFK	K	R	11	29	19	2	15T(79.9663)	sp|O75167|PHAR2_HUMAN	O75167	PHAR2_HUMAN	PHACTR2	Phosphatase and actin regulator 2			1	632025	MS/MS	STY:79.9663@AS(0.0138)IANS(0.0483)DGPT(0.0483)AGS(0.0483)QT(0.8412)PPFK;
ASIANSDGPTAGSQTPPFK	ASIANSDGPT[79.9663]AGSQTPPFK	K	R	11	29	19	2	10T(79.9663)	sp|O75167|PHAR2_HUMAN	O75167	PHAR2_HUMAN	PHACTR2	Phosphatase and actin regulator 2			1	632025	MS/MS	STY:79.9663@AS(0.0254)IANS(0.0438)DGPT(0.3102)AGS(0.3102)QT(0.3102)PPFK;
ASLGSLEGEAEAEASSPK	ASLGSLEGEAEAEAS[79.9663]SPK	K	G	5748	5765	18	2	15S(79.9663)	sp|Q09666|AHNK_HUMAN	Q09666	AHNK_HUMAN	AHNAK	Neuroblast differentiation-associated protein AHNAK			7	5.80428e+06	MS/MS	STY:79.9663@AS(0.0120)LGS(0.0120)LEGEAEAEAS(0.4880)S(0.4880)PK;
ASLVSEEEEDEEEDK	ASLVS[79.9663]EEEEDEEEDK	K	A	113	127	15	2	5S(79.9663)	sp|Q96GN5|CDA7L_HUMAN	Q96GN5	CDA7L_HUMAN	CDCA7L	Cell division cycle-associated 7-like protein			1	0	MS/MS	STY:79.9663@AS(0.0779)LVS(0.9221)EEEEDEEEDK;
ASNEDVTK	ASNEDVT[79.9663]K	K	A	128	135	8	2	7T(79.9663)	sp|O75475|PSIP1_HUMAN	O75475	PSIP1_HUMAN	PSIP1	PC4 and SFRS1-interacting protein			1	546541	MS/MS	STY:79.9663@AS(0.1525)NEDVT(0.8475)K;
ASPAPGSGHPEGPGAHLDMNSLDR	ASPAPGS[79.9663]GHPEGPGAHLDMNSLDR	R	A	90	113	24	3	7S(79.9663)	sp|O94826|TOM70_HUMAN	O94826	TOM70_HUMAN	TOMM70	Mitochondrial import receptor subunit TOM70			1	765992	MS/MS	STY:79.9663@AS(0.0421)PAPGS(0.7138)GHPEGPGAHLDMNS(0.2441)LDR;
ASPATQPPPLLPPSATGPDATVGGPAPTPLLPPSATASVK	ASPATQPPPLLPPSATGPDATVGGPAPTPLLPPSAT[79.9663]ASVK	R	M	57	96	40	4	36T(79.9663)	sp|Q07666|KHDR1_HUMAN	Q07666	KHDR1_HUMAN	KHDRBS1	KH domain-containing, RNA-binding, signal transduction-associated protein 1			1	3265133	MS/MS	STY:79.9663@AS(0.1249)PAT(0.1249)QPPPLLPPS(0.1249)AT(0.0736)GPDAT(0.0074)VGGPAPT(0.0056)PLLPPS(0.0056)AT(0.2666)AS(0.2666)VK;
ASPATQPPPLLPPSATGPDATVGGPAPTPLLPPSATASVK	ASPATQPPPLLPPSATGPDATVGGPAPTPLLPPS[79.9663]ATASVK	R	M	57	96	40	4	34S(79.9663)	sp|Q07666|KHDR1_HUMAN	Q07666	KHDR1_HUMAN	KHDRBS1	KH domain-containing, RNA-binding, signal transduction-associated protein 1			1	1.86705e+06	MS/MS	STY:79.9663@AS(0.1179)PAT(0.1179)QPPPLLPPS(0.0874)AT(0.0360)GPDAT(0.1130)VGGPAPT(0.0027)PLLPPS(0.1750)AT(0.1750)AS(0.1750)VK;
ASPATQPPPLLPPSATGPDATVGGPAPTPLLPPSATASVK	ASPATQPPPLLPPSAT[79.9663]GPDATVGGPAPTPLLPPSATASVK	R	M	57	96	40	3	16T(79.9663)	sp|Q07666|KHDR1_HUMAN	Q07666	KHDR1_HUMAN	KHDRBS1	KH domain-containing, RNA-binding, signal transduction-associated protein 1			1	8.02227e+06	MS/MS	STY:79.9663@AS(0.0312)PAT(0.0312)QPPPLLPPS(0.0094)AT(0.8488)GPDAT(0.0506)VGGPAPT(0.0073)PLLPPS(0.0072)AT(0.0072)AS(0.0072)VK;
ASPATQPPPLLPPSATGPDATVGGPAPTPLLPPSATASVK	ASPATQPPPLLPPS[79.9663]ATGPDATVGGPAPTPLLPPSATASVK	R	M	57	96	40	3	14S(79.9663)	sp|Q07666|KHDR1_HUMAN	Q07666	KHDR1_HUMAN	KHDRBS1	KH domain-containing, RNA-binding, signal transduction-associated protein 1			1	2.68743e+06	MS/MS	STY:79.9663@AS(0.1174)PAT(0.1174)QPPPLLPPS(0.3609)AT(0.3609)GPDAT(0.0165)VGGPAPT(0.0067)PLLPPS(0.0067)AT(0.0067)AS(0.0067)VK;
ASPGTPLSPGSLR	ASPGTPLS[79.9663]PGSLR	R	S	33	45	13	2	8S(79.9663)	sp|Q96BD0|SO4A1_HUMAN	Q96BD0	SO4A1_HUMAN	SLCO4A1	Solute carrier organic anion transporter family member 4A1			1	0	MS/MS	STY:79.9663@AS(0.0141)PGT(0.0141)PLS(0.4859)PGS(0.4859)LR;
ASSHSSQTQGGGSVTK	ASSHSSQTQGGGSVT[79.9663]K	R	K	402	417	16	2	15T(79.9663)	sp|P02545|LMNA_HUMAN	P02545	LMNA_HUMAN	LMNA	Prelamin-A/C			1	1.01632e+06	MS/MS	STY:79.9663@AS(0.0097)S(0.0097)HS(0.1149)S(0.1149)QT(0.1149)QGGGS(0.1149)VT(0.5208)K;
ASSHSSQTQGGGSVTK	ASSHSSQTQGGGS[79.9663]VTK	R	K	402	417	16	2	13S(79.9663)	sp|P02545|LMNA_HUMAN	P02545	LMNA_HUMAN	LMNA	Prelamin-A/C			1	475625	MS/MS	STY:79.9663@AS(0.0227)S(0.0227)HS(0.0227)S(0.1084)QT(0.1084)QGGGS(0.3576)VT(0.3576)K;
ASSHSSQTQGGGSVTK	ASSHSS[79.9663]QTQGGGSVTK	R	K	402	417	16	2	6S(79.9663)	sp|P02545|LMNA_HUMAN	P02545	LMNA_HUMAN	LMNA	Prelamin-A/C			1	925923	MS/MS	STY:79.9663@AS(0.0528)S(0.0528)HS(0.0528)S(0.3697)QT(0.3697)QGGGS(0.0938)VT(0.0084)K;
ASSHSSQTQGGGSVTK	ASSHS[79.9663]SQTQGGGSVTK	R	K	402	417	16	2	5S(79.9663)	sp|P02545|LMNA_HUMAN	P02545	LMNA_HUMAN	LMNA	Prelamin-A/C			1	493544	MS/MS	STY:79.9663@AS(0.0087)S(0.0087)HS(0.1965)S(0.1965)QT(0.1965)QGGGS(0.1965)VT(0.1965)K;
ASSLSESSPPK	ASSLSES[79.9663]SPPK	R	A	367	377	11	2	7S(79.9663)	sp|Q9UHB6|LIMA1_HUMAN	Q9UHB6	LIMA1_HUMAN	LIMA1	LIM domain and actin-binding protein 1			1	2.35016e+06	MS/MS	STY:79.9663@AS(0.0102)S(0.0102)LS(0.0102)ES(0.4846)S(0.4846)PPK;
ASSLSESSPPK	ASSLS[79.9663]ESSPPK	R	A	367	377	11	2	5S(79.9663)	sp|Q9UHB6|LIMA1_HUMAN	Q9UHB6	LIMA1_HUMAN	LIMA1	LIM domain and actin-binding protein 1			2	2.35016e+06	MS/MS	STY:79.9663@AS(0.0068)S(0.0068)LS(0.3288)ES(0.3288)S(0.3288)PPK;
ASSPAESSPEDSGYMR	ASSPAES[79.9663]SPEDSGYMR	K	M	729	744	16	2	7S(79.9663)	sp|Q9Y4H2|IRS2_HUMAN	Q9Y4H2	IRS2_HUMAN	IRS2	Insulin receptor substrate 2			1	0	MS/MS	STY:79.9663@AS(0.2003)S(0.2003)PAES(0.2940)S(0.2940)PEDS(0.0057)GY(0.0057)MR;
ASSPSPLTIGTPESQR	ASSPSPLTIGTPES[79.9663]QR	K	K	521	536	16	2	14S(79.9663)	sp|Q9NPI6|DCP1A_HUMAN	Q9NPI6	DCP1A_HUMAN	DCP1A	mRNA-decapping enzyme 1A			1	0	MS/MS	STY:79.9663@AS(0.0228)S(0.0228)PS(0.0228)PLT(0.0228)IGT(0.0228)PES(0.8860)QR;
ASSVTTFTGEPNTCPR	ASSVT[79.9663]TFTGEPNTC[57.0215]PR	R	C	113	128	16	2	14C(57.0215),5T(79.9663)	sp|P52943|CRIP2_HUMAN	P52943	CRIP2_HUMAN	CRIP2	Cysteine-rich protein 2			1	2.41367e+06	MS/MS	STY:79.9663@AS(0.0265)S(0.0265)VT(0.4656)T(0.4656)FT(0.0079)GEPNT(0.0079)CPR;
ASSLNFLNK	ASS[79.9663]LNFLNK	R	S	580	588	9	2	3S(79.9663)	sp|Q9H0B6|KLC2_HUMAN	Q9H0B6	KLC2_HUMAN	KLC2	Kinesin light chain 2			1	601830	MS/MS	STY:79.9663@AS(0.1529)S(0.8471)LNFLNK;
ASSVTTFTGEPNTCPR	ASS[79.9663]VTTFTGEPNTC[57.0215]PR	R	C	113	128	16	2	14C(57.0215),3S(79.9663)	sp|P52943|CRIP2_HUMAN	P52943	CRIP2_HUMAN	CRIP2	Cysteine-rich protein 2			1	2.41367e+06	MS/MS	STY:79.9663@AS(0.0080)S(0.2463)VT(0.2463)T(0.2463)FT(0.2463)GEPNT(0.0066)CPR;
ASVLDTSMSAGSGSPSK	ASVLDTSM[15.9949]SAGS[79.9663]GSPSK	R	T	510	526	17	2	12S(79.9663),8M(15.9949)	sp|Q9UPQ0|LIMC1_HUMAN	Q9UPQ0	LIMC1_HUMAN	LIMCH1	LIM and calponin homology domains-containing protein 1			1	469579	MS/MS	STY:79.9663@AS(0.0063)VLDT(0.0075)S(0.0075)MS(0.0212)AGS(0.3192)GS(0.3192)PS(0.3192)K;M:15.9949@ASVLDTSM(1.0000)SAGSGSPSK;
ASVLDTSMSAGSGSPSK	ASVLDTS[79.9663]MSAGSGSPSK	R	T	510	526	17	2	7S(79.9663)	sp|Q9UPQ0|LIMC1_HUMAN	Q9UPQ0	LIMC1_HUMAN	LIMCH1	LIM and calponin homology domains-containing protein 1			1	0	MS/MS	STY:79.9663@AS(0.0100)VLDT(0.0100)S(0.1960)MS(0.1960)AGS(0.1960)GS(0.1960)PS(0.1960)K;
ASVLDTSMSAGSGSPSK	ASVLDTS[79.9663]M[15.9949]SAGSGSPSK	R	T	510	526	17	2	7S(79.9663),8M(15.9949)	sp|Q9UPQ0|LIMC1_HUMAN	Q9UPQ0	LIMC1_HUMAN	LIMCH1	LIM and calponin homology domains-containing protein 1			1	469579	MS/MS	STY:79.9663@AS(0.0144)VLDT(0.0275)S(0.8532)MS(0.0262)AGS(0.0262)GS(0.0262)PS(0.0262)K;M:15.9949@ASVLDTSM(1.0000)SAGSGSPSK;
ASVSPMDEPVPDSESPIEK	ASVSPMDEPVPDSES[79.9663]PIEK	R	V	1375	1393	19	2	15S(79.9663)	sp|P46821|MAP1B_HUMAN	P46821	MAP1B_HUMAN	MAP1B	Microtubule-associated protein 1B			1	0	MS/MS	STY:79.9663@AS(0.0514)VS(0.0514)PMDEPVPDS(0.2229)ES(0.6742)PIEK;
ASVSPMDEPVPDSESPIEK	ASVSPMDEPVPDS[79.9663]ESPIEK	R	V	1375	1393	19	2	13S(79.9663)	sp|P46821|MAP1B_HUMAN	P46821	MAP1B_HUMAN	MAP1B	Microtubule-associated protein 1B			1	1.85496e+06	MS/MS	STY:79.9663@AS(0.0145)VS(0.0140)PMDEPVPDS(0.4857)ES(0.4857)PIEK;
ASVSPMDEPVPDSESPIEK	ASVSPM[15.9949]DEPVPDS[79.9663]ESPIEK	R	V	1375	1393	19	2	13S(79.9663),6M(15.9949)	sp|P46821|MAP1B_HUMAN	P46821	MAP1B_HUMAN	MAP1B	Microtubule-associated protein 1B			1	767736	MS/MS	STY:79.9663@AS(0.0148)VS(0.0148)PMDEPVPDS(0.4852)ES(0.4852)PIEK;M:15.9949@ASVSPM(1.0000)DEPVPDSESPIEK;
ASVVDPSTESSPAPQEGSEQPASPASPLSSR	ASVVDPSTESSPAPQEGSEQPAS[79.9663]PASPLSSR	K	Q	410	440	31	3	23S(79.9663)	sp|Q66K14|TBC9B_HUMAN	Q66K14	TBC9B_HUMAN	TBC1D9B	TBC1 domain family member 9B			2	1.53374e+06	MS/MS	STY:79.9663@AS(0.0048)VVDPS(0.0039)T(0.0039)ES(0.0043)S(0.0043)PAPQEGS(0.0044)EQPAS(0.2436)PAS(0.2436)PLS(0.2436)S(0.2436)R;
ASVVDPSTESSPAPQEGSEQPASPASPLSSR	ASVVDPSTESS[79.9663]PAPQEGSEQPASPASPLSSR	K	Q	410	440	31	3	11S(79.9663)	sp|Q66K14|TBC9B_HUMAN	Q66K14	TBC9B_HUMAN	TBC1D9B	TBC1 domain family member 9B			1	1.53374e+06	MS/MS	STY:79.9663@AS(0.1064)VVDPS(0.0128)T(0.0128)ES(0.0128)S(0.7031)PAPQEGS(0.0304)EQPAS(0.0304)PAS(0.0304)PLS(0.0304)S(0.0304)R;
ASAVSELSPR	AS[79.9663]AVSELSPR	R	E	236	245	10	2	2S(79.9663)	sp|Q9Y2W1|TR150_HUMAN	Q9Y2W1	TR150_HUMAN	THRAP3	Thyroid hormone receptor-associated protein 3			2	1.0608272E7	MS/MS	STY:79.9663@AS(0.3333)AVS(0.3333)ELS(0.3333)PR;
ASDPDEAGGPEGSEAVQSGTPEEPEPELEAEASK	AS[79.9663]DPDEAGGPEGSEAVQSGTPEEPEPELEAEASK	R	E	130	163	34	3	2S(79.9663)	sp|O60936|NOL3_HUMAN	O60936	NOL3_HUMAN	NOL3	Nucleolar protein 3			2	1.58295e+06	MS/MS	STY:79.9663@AS(0.9169)DPDEAGGPEGS(0.0212)EAVQS(0.0212)GT(0.0212)PEEPEPELEAEAS(0.0196)K;
ASDPGLPAEEPK	AS[79.9663]DPGLPAEEPK	R	E	1858	1869	12	2	2S(79.9663)	sp|P27708|PYR1_HUMAN	P27708	PYR1_HUMAN	CAD	Multifunctional protein CAD			1	1.96969e+06	MS/MS	STY:79.9663@AS(1.0000)DPGLPAEEPK;
ASDSEEPEEK	AS[79.9663]DSEEPEEK	K	Q	383	392	10	2	2S(79.9663)	sp|Q9C0E8|LNP_HUMAN	Q9C0E8	LNP_HUMAN	LNPK	Endoplasmic reticulum junction formation protein lunapark			1	142438	MS/MS	STY:79.9663@AS(0.5000)DS(0.5000)EEPEEK;
ASEDTTSGSPPK	AS[79.9663]EDTTSGSPPK	R	K	456	467	12	2	2S(79.9663)	sp|Q9BZZ5|API5_HUMAN	Q9BZZ5	API5_HUMAN	API5	Apoptosis inhibitor 5			2	830874	MS/MS	STY:79.9663@AS(0.2000)EDT(0.2000)T(0.2000)S(0.2000)GS(0.2000)PPK;
ASEDTTSGSPPKK	AS[79.9663]EDTTSGSPPKK	R	S	456	468	13	2	2S(79.9663)	sp|Q9BZZ5|API5_HUMAN	Q9BZZ5	API5_HUMAN	API5	Apoptosis inhibitor 5			3	1.60865e+06	MS/MS	STY:79.9663@AS(0.9022)EDT(0.0400)T(0.0193)S(0.0193)GS(0.0193)PPKK;
ASGDPGASGMSPR	AS[79.9663]GDPGASGMSPR	K	A	99	111	13	2	2S(79.9663)	sp|Q8NDT2|RB15B_HUMAN	Q8NDT2	RB15B_HUMAN	RBM15B	Putative RNA-binding protein 15B			1	416855	MS/MS	STY:79.9663@AS(0.3333)GDPGAS(0.3333)GMS(0.3333)PR;
ASGQAFELILSPR	AS[79.9663]GQAFELILSPR	R	S	15	27	13	2	2S(79.9663)	sp|P16949|STMN1_HUMAN	P16949	STMN1_HUMAN	STMN1	Stathmin			1	5.66284e+06	MS/MS	STY:79.9663@AS(0.5000)GQAFELILS(0.5000)PR;
ASGVAVSDGVIK	AS[79.9663]GVAVSDGVIK	M	V	2	13	12	2	2S(79.9663)	sp|P23528|COF1_HUMAN	P23528	COF1_HUMAN	CFL1	Cofilin-1			1	0	MS/MS	STY:79.9663@AS(0.9353)GVAVS(0.0647)DGVIK;
ASLEDAPVDDLTR	AS[79.9663]LEDAPVDDLTR	R	K	283	295	13	2	2S(79.9663)	sp|Q7Z2W4|ZCCHV_HUMAN	Q7Z2W4	ZCCHV_HUMAN	ZC3HAV1	Zinc finger CCCH-type antiviral protein 1			1	0	MS/MS	STY:79.9663@AS(0.9369)LEDAPVDDLT(0.0631)R;
ASLGSLEGEAEAEASSPK	AS[79.9663]LGSLEGEAEAEASSPK	K	G	5748	5765	18	2,3	2S(79.9663)	sp|Q09666|AHNK_HUMAN	Q09666	AHNK_HUMAN	AHNAK	Neuroblast differentiation-associated protein AHNAK			3	4152181	MS/MS	STY:79.9663@AS(0.8562)LGS(0.0194)LEGEAEAEAS(0.0622)S(0.0622)PK;
ASLGSLEGEAEAEASSPK	AS[79.9663]LGS[79.9663]LEGEAEAEASSPK	K	G	5748	5765	18	2	2S(79.9663),5S(79.9663)	sp|Q09666|AHNK_HUMAN	Q09666	AHNK_HUMAN	AHNAK	Neuroblast differentiation-associated protein AHNAK			1	0	MS/MS	STY:79.9663@AS(0.5000)LGS(0.5000)LEGEAEAEAS(0.5000)S(0.5000)PK;
ASLVALPEQTASEEETPPPLLTK	AS[79.9663]LVALPEQTASEEETPPPLLTK	K	E	399	421	23	3	2S(79.9663)	sp|Q9UKV3|ACINU_HUMAN	Q9UKV3	ACINU_HUMAN	ACIN1	Apoptotic chromatin condensation inducer in the nucleus			1	1.64768e+06	MS/MS	STY:79.9663@AS(0.4626)LVALPEQT(0.0720)AS(0.0396)EEET(0.0306)PPPLLT(0.3952)K;
ASLVSEEEEDEEEDK	AS[79.9663]LVSEEEEDEEEDK	K	A	113	127	15	2	2S(79.9663)	sp|Q96GN5|CDA7L_HUMAN	Q96GN5	CDA7L_HUMAN	CDCA7L	Cell division cycle-associated 7-like protein			1	0	MS/MS	STY:79.9663@AS(0.5000)LVS(0.5000)EEEEDEEEDK;
ASNEDVTK	AS[79.9663]NEDVTK	K	A	128	135	8	2	2S(79.9663)	sp|O75475|PSIP1_HUMAN	O75475	PSIP1_HUMAN	PSIP1	PC4 and SFRS1-interacting protein			1	636210	MS/MS	STY:79.9663@AS(0.5000)NEDVT(0.5000)K;
ASPAPGSGHPEGPGAHLDMNSLDR	AS[79.9663]PAPGSGHPEGPGAHLDMNSLDR	R	A	90	113	24	3	2S(79.9663)	sp|O94826|TOM70_HUMAN	O94826	TOM70_HUMAN	TOMM70	Mitochondrial import receptor subunit TOM70			3	853897	MS/MS	STY:79.9663@AS(0.8414)PAPGS(0.0674)GHPEGPGAHLDMNS(0.0912)LDR;
ASPATQPPPLLPPSATGPDATVGGPAPTPLLPPSATASVK	AS[79.9663]PATQPPPLLPPSATGPDATVGGPAPTPLLPPSATASVK	R	M	57	96	40	4	2S(79.9663)	sp|Q07666|KHDR1_HUMAN	Q07666	KHDR1_HUMAN	KHDRBS1	KH domain-containing, RNA-binding, signal transduction-associated protein 1			2	5132183	MS/MS	STY:79.9663@AS(0.5792)PAT(0.0069)QPPPLLPPS(0.0597)AT(0.0597)GPDAT(0.0597)VGGPAPT(0.0587)PLLPPS(0.0587)AT(0.0587)AS(0.0587)VK;
ASPEPPGPESSSR	AS[79.9663]PEPPGPESSSR	R	W	671	683	13	2	2S(79.9663)	sp|Q9C0C2|TB182_HUMAN	Q9C0C2	TB182_HUMAN	TNKS1BP1	182 kDa tankyrase-1-binding protein			4	2.47292e+06	MS/MS	STY:79.9663@AS(0.9201)PEPPGPES(0.0266)S(0.0266)S(0.0266)R;
ASPEPQR	AS[79.9663]PEPQR	R	E	963	969	7	2	2S(79.9663)	sp|P46379|BAG6_HUMAN	P46379	BAG6_HUMAN	BAG6	Large proline-rich protein BAG6			1	346231	MS/MS	STY:79.9663@AS(1.0000)PEPQR;
ASPPGDLQNPK	AS[79.9663]PPGDLQNPK	K	R	314	324	11	2	2S(79.9663)	sp|O00273|DFFA_HUMAN	O00273	DFFA_HUMAN	DFFA	DNA fragmentation factor subunit alpha			7	4690319	MS/MS	STY:79.9663@AS(1.0000)PPGDLQNPK;
ASPSTAGETPSGVK	AS[79.9663]PSTAGETPSGVK	K	R	129	142	14	2	2S(79.9663)	sp|Q9UI10|EI2BD_HUMAN	Q9UI10	EI2BD_HUMAN	EIF2B4	Translation initiation factor eIF2B subunit delta			1	701875	MS/MS	STY:79.9663@AS(0.9327)PS(0.0168)T(0.0168)AGET(0.0168)PS(0.0168)GVK;
ASSFLDTSK	AS[79.9663]SFLDTSK	R	D	1894	1902	9	2	2S(79.9663)	sp|Q9Y485|DMXL1_HUMAN	Q9Y485	DMXL1_HUMAN	DMXL1	DmX-like protein 1			1	216211	MS/MS	STY:79.9663@AS(0.3296)S(0.3296)FLDT(0.3296)S(0.0111)K;
ASSHSSQTQGGGSVTK	AS[79.9663]SHSSQTQGGGSVTK	R	K	402	417	16	2	2S(79.9663)	sp|P02545|LMNA_HUMAN	P02545	LMNA_HUMAN	LMNA	Prelamin-A/C			6	1.95237e+06	MS/MS	STY:79.9663@AS(0.4740)S(0.4740)HS(0.0104)S(0.0104)QT(0.0104)QGGGS(0.0104)VT(0.0104)K;
ASSLEDLVLK	AS[79.9663]SLEDLVLK	R	E	254	263	10	2	2S(79.9663)	sp|Q15477|SKI2_HUMAN	Q15477	SKI2_HUMAN	SKIC2	Superkiller complex protein 2			6	5.71216e+06	MS/MS	STY:79.9663@AS(0.9365)S(0.0635)LEDLVLK;
ASSLGEIDESSELR	AS[79.9663]SLGEIDESSELR	R	V	581	594	14	2	2S(79.9663)	sp|Q16513|PKN2_HUMAN	Q16513	PKN2_HUMAN	PKN2	Serine/threonine-protein kinase N2			1	2.51152e+06	MS/MS	STY:79.9663@AS(0.4640)S(0.4640)LGEIDES(0.0360)S(0.0360)ELR;
ASSLNFLNK	AS[79.9663]SLNFLNK	R	S	580	588	9	2	2S(79.9663)	sp|Q9H0B6|KLC2_HUMAN	Q9H0B6	KLC2_HUMAN	KLC2	Kinesin light chain 2			1	601830	MS/MS	STY:79.9663@AS(0.5000)S(0.5000)LNFLNK;
ASSLSESSPPK	AS[79.9663]SLSESSPPK	R	A	367	377	11	2	2S(79.9663)	sp|Q9UHB6|LIMA1_HUMAN	Q9UHB6	LIMA1_HUMAN	LIMA1	LIM domain and actin-binding protein 1			4	4457144	MS/MS	STY:79.9663@AS(0.4827)S(0.4827)LS(0.0116)ES(0.0116)S(0.0116)PPK;
ASSPAQCVTPVQTVV	AS[79.9663]SPAQC[57.0215]VTPVQTVV	R	-	629	643	15	2	2S(79.9663),7C(57.0215)	sp|Q13614|MTMR2_HUMAN	Q13614	MTMR2_HUMAN	MTMR2	Phosphatidylinositol-3,5-bisphosphate 3-phosphatase MTMR2			1	1637869	MS/MS	STY:79.9663@AS(0.4874)S(0.4874)PAQCVT(0.0126)PVQT(0.0126)VV;
ASSPPDR	AS[79.9663]SPPDR	R	I	75	81	7	2	2S(79.9663)	sp|Q9NWB6|ARGL1_HUMAN	Q9NWB6	ARGL1_HUMAN	ARGLU1	Arginine and glutamate-rich protein 1			2	2241515	MS/MS	STY:79.9663@AS(0.5000)S(0.5000)PPDR;
ASSPSLIER	AS[79.9663]SPSLIER	R	N	221	229	9	2	2S(79.9663)	sp|A1L170|CA226_HUMAN	A1L170	CA226_HUMAN	C1orf226	Uncharacterized protein C1orf226			1	315154	MS/MS	STY:79.9663@AS(0.3333)S(0.3333)PS(0.3333)LIER;
ASSVTTFTGEPNTCPR	AS[79.9663]SVTTFTGEPNTC[57.0215]PR	R	C	113	128	16	2	14C(57.0215),2S(79.9663)	sp|P52943|CRIP2_HUMAN	P52943	CRIP2_HUMAN	CRIP2	Cysteine-rich protein 2			3	2.41367e+06	MS/MS	STY:79.9663@AS(0.3641)S(0.3641)VT(0.1288)T(0.1288)FT(0.0071)GEPNT(0.0070)CPR;
ASTASPCNNNINAATAVALQEPR	AS[79.9663]TASPC[57.0215]NNNINAATAVALQEPR	R	K	593	615	23	3	2S(79.9663),7C(57.0215)	sp|Q71RC2|LARP4_HUMAN	Q71RC2	LARP4_HUMAN	LARP4	La-related protein 4			1	0	MS/MS	STY:79.9663@AS(0.4110)T(0.4110)AS(0.0506)PCNNNINAAT(0.1274)AVALQEPR;
ASVSPMDEPVPDSESPIEK	AS[79.9663]VSPMDEPVPDSESPIEK	R	V	1375	1393	19	2	2S(79.9663)	sp|P46821|MAP1B_HUMAN	P46821	MAP1B_HUMAN	MAP1B	Microtubule-associated protein 1B			3	2.3459e+06	MS/MS	STY:79.9663@AS(0.4866)VS(0.4866)PMDEPVPDS(0.0134)ES(0.0134)PIEK;
ASVSPMDEPVPDSESPIEK	AS[79.9663]VSPM[15.9949]DEPVPDSESPIEK	R	V	1375	1393	19	2	2S(79.9663),6M(15.9949)	sp|P46821|MAP1B_HUMAN	P46821	MAP1B_HUMAN	MAP1B	Microtubule-associated protein 1B			1	767736	MS/MS	STY:79.9663@AS(0.4654)VS(0.4654)PMDEPVPDS(0.0462)ES(0.0229)PIEK;M:15.9949@ASVSPM(1.0000)DEPVPDSESPIEK;
ASVVDPSTESSPAPQEGSEQPASPASPLSSR	AS[79.9663]VVDPSTESSPAPQEGSEQPASPASPLSSR	K	Q	410	440	31	3	2S(79.9663)	sp|Q66K14|TBC9B_HUMAN	Q66K14	TBC9B_HUMAN	TBC1D9B	TBC1 domain family member 9B			1	1.53374e+06	MS/MS	STY:79.9663@AS(0.1000)VVDPS(0.1000)T(0.1000)ES(0.1000)S(0.1000)PAPQEGS(0.1000)EQPAS(0.1000)PAS(0.1000)PLS(0.1000)S(0.1000)R;
ATAPQTQHVSPMR	ATAPQTQHVS[79.9663]PMR	R	Q	124	136	13	2,3	10S(79.9663)	sp|P29692|EF1D_HUMAN	P29692	EF1D_HUMAN	EEF1D	Elongation factor 1-delta			19	1.9070396E7	MS/MS	STY:79.9663@AT(0.0277)APQT(0.0277)QHVS(0.9445)PMR;
ATAPQTQHVSPMR	ATAPQTQHVS[79.9663]PM[15.9949]R	R	Q	124	136	13	2,3	10S(79.9663),12M(15.9949)	sp|P29692|EF1D_HUMAN	P29692	EF1D_HUMAN	EEF1D	Elongation factor 1-delta			8	3641636	MS/MS	STY:79.9663@AT(0.0317)APQT(0.0317)QHVS(0.9367)PMR;M:15.9949@ATAPQTQHVSPM(1.0000)R;
ATAPQTQHVSPMR	ATAPQT[79.9663]QHVSPMR	R	Q	124	136	13	2,3	6T(79.9663)	sp|P29692|EF1D_HUMAN	P29692	EF1D_HUMAN	EEF1D	Elongation factor 1-delta			14	1.8642696E7	MS/MS	STY:79.9663@AT(0.0288)APQT(0.9306)QHVS(0.0406)PMR;
ATAPQTQHVSPMR	ATAPQT[79.9663]QHVSPM[15.9949]R	R	Q	124	136	13	2	12M(15.9949),6T(79.9663)	sp|P29692|EF1D_HUMAN	P29692	EF1D_HUMAN	EEF1D	Elongation factor 1-delta			1	1.20936e+06	MS/MS	STY:79.9663@AT(0.0689)APQT(0.4655)QHVS(0.4655)PMR;M:15.9949@ATAPQTQHVSPM(1.0000)R;
ATAQPPAPLSPDSGSPSPDSGSASPVEEEDVGSSEK	ATAQPPAPLSPDSGSPSPDSGSASPVEEEDVGS[79.9663]SEK	R	L	15	50	36	3	33S(79.9663)	sp|O95361|TRI16_HUMAN	O95361	TRI16_HUMAN	TRIM16	Tripartite motif-containing protein 16			1	0	MS/MS	STY:79.9663@AT(0.0927)AQPPAPLS(0.0927)PDS(0.0927)GS(0.0927)PS(0.0927)PDS(0.0927)GS(0.0071)AS(0.0071)PVEEEDVGS(0.2148)S(0.2148)EK;
ATAQPPAPLSPDSGSPSPDSGSASPVEEEDVGSSEK	ATAQPPAPLSPDSGSPSPDS[79.9663]GSASPVEEEDVGSSEK	R	L	15	50	36	3	20S(79.9663)	sp|O95361|TRI16_HUMAN	O95361	TRI16_HUMAN	TRIM16	Tripartite motif-containing protein 16			2	2969606	MS/MS	STY:79.9663@AT(0.0112)AQPPAPLS(0.0112)PDS(0.0112)GS(0.0112)PS(0.0112)PDS(0.7689)GS(0.0438)AS(0.0438)PVEEEDVGS(0.0438)S(0.0438)EK;
ATEDGEEDEVSAGEK	ATEDGEEDEVS[79.9663]AGEK	K	E	1425	1439	15	2	11S(79.9663)	sp|Q9BXW9|FACD2_HUMAN	Q9BXW9	FACD2_HUMAN	FANCD2	Fanconi anemia group D2 protein			4	6023999	MS/MS	STY:79.9663@AT(0.0583)EDGEEDEVS(0.9417)AGEK;
ATGAATPKK	ATGAAT[79.9663]PKK	K	S	141	149	9	2	6T(79.9663)	sp|P10412|H14_HUMAN	P10412	H14_HUMAN	H1-4	Histone H1.4			4	1575135	MS/MS	STY:79.9663@AT(0.0559)GAAT(0.9441)PKK;
ATGGLCLLGAYADSDDDDNDVSEK	ATGGLC[57.0215]LLGAY[79.9663]ADSDDDDNDVSEK	K	L	103	126	24	3	11Y(79.9663),6C(57.0215)	sp|Q8N3X1|FNBP4_HUMAN	Q8N3X1	FNBP4_HUMAN	FNBP4	Formin-binding protein 4			1	1.55021e+06	MS/MS	STY:79.9663@AT(0.0120)GGLCLLGAY(0.4880)ADS(0.4880)DDDDNDVS(0.0119)EK;
ATLSSTSGLDLMSESGEGEISPQR	ATLSSTSGLDLMSESGEGEIS[79.9663]PQR	K	E	1006	1029	24	3	21S(79.9663)	sp|Q8WWI1|LMO7_HUMAN	Q8WWI1	LMO7_HUMAN	LMO7	LIM domain only protein 7			1	0	MS/MS	STY:79.9663@AT(0.1033)LS(0.1033)S(0.1033)T(0.1033)S(0.1393)GLDLMS(0.1263)ES(0.0316)GEGEIS(0.2894)PQR;
ATNESEDEIPQLVPIGK	ATNES[79.9663]EDEIPQLVPIGK	K	K	357	373	17	2	5S(79.9663)	sp|O76021|RL1D1_HUMAN	O76021	RL1D1_HUMAN	RSL1D1	Ribosomal L1 domain-containing protein 1			1	1.2633918E7	MS/MS	STY:79.9663@AT(0.0570)NES(0.9430)EDEIPQLVPIGK;
ATPELGSSENSASSPPR	ATPELGSSENSAS[79.9663]SPPR	K	F	1019	1035	17	2	13S(79.9663)	sp|Q9BX63|FANCJ_HUMAN	Q9BX63	FANCJ_HUMAN	BRIP1	Fanconi anemia group J protein			1	363862	MS/MS	STY:79.9663@AT(0.0085)PELGS(0.0148)S(0.0148)ENS(0.0148)AS(0.4735)S(0.4735)PPR;
ATSDTLESPPK	ATSDTLES[79.9663]PPK	K	I	306	316	11	2	8S(79.9663)	sp|O94782|UBP1_HUMAN	O94782	UBP1_HUMAN	USP1	Ubiquitin carboxyl-terminal hydrolase 1			1	518767	MS/MS	STY:79.9663@AT(0.0816)S(0.0816)DT(0.0270)LES(0.8098)PPK;
ATSPLCTSTASMVSSSPSTPSNIPQK	ATSPLC[57.0215]TSTAS[79.9663]MVSSSPSTPSNIPQK	R	P	145	170	26	3	11S(79.9663),6C(57.0215)	sp|P30622|CLIP1_HUMAN	P30622	CLIP1_HUMAN	CLIP1	CAP-Gly domain-containing linker protein 1			1	1.97537e+06	MS/MS	STY:79.9663@AT(0.0963)S(0.0963)PLCT(0.0963)S(0.0963)T(0.0963)AS(0.4223)MVS(0.0274)S(0.0274)S(0.0274)PS(0.0051)T(0.0049)PS(0.0041)NIPQK;
ATSPLCTSTASMVSSSPSTPSNIPQK	ATSPLC[57.0215]TS[79.9663]TASMVSSSPSTPSNIPQK	R	P	145	170	26	3	6C(57.0215),8S(79.9663)	sp|P30622|CLIP1_HUMAN	P30622	CLIP1_HUMAN	CLIP1	CAP-Gly domain-containing linker protein 1			1	1.97537e+06	MS/MS	STY:79.9663@AT(0.0699)S(0.0130)PLCT(0.0130)S(0.2863)T(0.2863)AS(0.2863)MVS(0.0075)S(0.0075)S(0.0075)PS(0.0075)T(0.0075)PS(0.0075)NIPQK;
ATSPLVSLYPALECR	ATSPLVSLY[79.9663]PALEC[57.0215]R	R	A	506	520	15	2	14C(57.0215),9Y(79.9663)	sp|Q96G74|OTUD5_HUMAN	Q96G74	OTUD5_HUMAN	OTUD5	OTU domain-containing protein 5			1	0	MS/MS	STY:79.9663@AT(0.2138)S(0.0201)PLVS(0.0201)LY(0.7460)PALECR;
ATVTPSPVK	ATVTPS[79.9663]PVK	K	G	176	184	9	2	6S(79.9663)	sp|Q9H1E3|NUCKS_HUMAN	Q9H1E3	NUCKS_HUMAN	NUCKS1	Nuclear ubiquitous casein and cyclin-dependent kinase substrate 1			2	7.9419224E7	MS/MS	STY:79.9663@AT(0.0278)VT(0.0278)PS(0.9443)PVK;
ATVTPSPVK	ATVT[79.9663]PSPVK	K	G	176	184	9	2	4T(79.9663)	sp|Q9H1E3|NUCKS_HUMAN	Q9H1E3	NUCKS_HUMAN	NUCKS1	Nuclear ubiquitous casein and cyclin-dependent kinase substrate 1			6	8.5512728E7	MS/MS	STY:79.9663@AT(0.0272)VT(0.9401)PS(0.0327)PVK;
ATVTPSPVK	ATVT[79.9663]PS[79.9663]PVK	K	G	176	184	9	2	4T(79.9663),6S(79.9663)	sp|Q9H1E3|NUCKS_HUMAN	Q9H1E3	NUCKS_HUMAN	NUCKS1	Nuclear ubiquitous casein and cyclin-dependent kinase substrate 1			2	3.79285e+06	MS/MS	STY:79.9663@AT(0.1024)VT(0.9488)PS(0.9488)PVK;
ATAPQTQHVSPMR	AT[79.9663]APQTQHVSPMR	R	Q	124	136	13	2,3	2T(79.9663)	sp|P29692|EF1D_HUMAN	P29692	EF1D_HUMAN	EEF1D	Elongation factor 1-delta			15	1.840856E7	MS/MS	STY:79.9663@AT(0.9382)APQT(0.0309)QHVS(0.0309)PMR;
ATAPQTQHVSPMR	AT[79.9663]APQTQHVSPM[15.9949]R	R	Q	124	136	13	2	12M(15.9949),2T(79.9663)	sp|P29692|EF1D_HUMAN	P29692	EF1D_HUMAN	EEF1D	Elongation factor 1-delta			2	2.54586e+06	MS/MS	STY:79.9663@AT(0.3333)APQT(0.3333)QHVS(0.3333)PMR;M:15.9949@ATAPQTQHVSPM(1.0000)R;
ATAQPPAPLSPDSGSPSPDSGSASPVEEEDVGSSEK	AT[79.9663]AQPPAPLSPDSGSPSPDSGSASPVEEEDVGSSEK	R	L	15	50	36	3	2T(79.9663)	sp|O95361|TRI16_HUMAN	O95361	TRI16_HUMAN	TRIM16	Tripartite motif-containing protein 16			1	0	MS/MS	STY:79.9663@AT(0.1453)AQPPAPLS(0.1453)PDS(0.1453)GS(0.1453)PS(0.1453)PDS(0.0547)GS(0.0547)AS(0.0547)PVEEEDVGS(0.0547)S(0.0547)EK;
ATGAATPKK	AT[79.9663]GAATPKK	K	S	141	149	9	2	2T(79.9663)	sp|P10412|H14_HUMAN	P10412	H14_HUMAN	H1-4	Histone H1.4			2	986318	MS/MS	STY:79.9663@AT(0.5000)GAAT(0.5000)PKK;
ATGGLCLLGAYADSDDDDNDVSEK	AT[79.9663]GGLC[57.0215]LLGAYADSDDDDNDVSEK	K	L	103	126	24	3	2T(79.9663),6C(57.0215)	sp|Q8N3X1|FNBP4_HUMAN	Q8N3X1	FNBP4_HUMAN	FNBP4	Formin-binding protein 4			1	1.55021e+06	MS/MS	STY:79.9663@AT(0.3347)GGLCLLGAY(0.3347)ADS(0.0247)DDDDNDVS(0.3060)EK;
ATISDEEIER	AT[79.9663]ISDEEIER	K	Q	196	205	10	2	2T(79.9663)	sp|Q9UQN3|CHM2B_HUMAN	Q9UQN3	CHM2B_HUMAN	CHMP2B	Charged multivesicular body protein 2b			2	1.81858e+06	MS/MS	STY:79.9663@AT(0.5000)IS(0.5000)DEEIER;
ATLGPTPTTPPQPPDPSQPPPGPMQH	AT[79.9663]LGPTPTTPPQPPDPSQPPPGPMQH	R	-	101	126	26	3	2T(79.9663)	sp|O60927|PP1RB_HUMAN	O60927	PP1RB_HUMAN	PPP1R11	E3 ubiquitin-protein ligase PPP1R11			1	1.63913e+06	MS/MS	STY:79.9663@AT(0.7610)LGPT(0.0589)PT(0.0158)T(0.0158)PPQPPDPS(0.1485)QPPPGPMQH;
ATNESEDEIPQLVPIGK	AT[79.9663]NESEDEIPQLVPIGK	K	K	357	373	17	2,3	2T(79.9663)	sp|O76021|RL1D1_HUMAN	O76021	RL1D1_HUMAN	RSL1D1	Ribosomal L1 domain-containing protein 1			7	1.4101165E7	MS/MS	STY:79.9663@AT(0.9111)NES(0.0889)EDEIPQLVPIGK;
ATSDTLESPPK	AT[79.9663]SDTLESPPK	K	I	306	316	11	2	2T(79.9663)	sp|O94782|UBP1_HUMAN	O94782	UBP1_HUMAN	USP1	Ubiquitin carboxyl-terminal hydrolase 1			1	518767	MS/MS	STY:79.9663@AT(0.2500)S(0.2500)DT(0.2500)LES(0.2500)PPK;
ATSSTQSLAR	AT[79.9663]SSTQSLAR	R	L	1850	1859	10	2	2T(79.9663)	sp|Q14980|NUMA1_HUMAN	Q14980	NUMA1_HUMAN	NUMA1	Nuclear mitotic apparatus protein 1			5	1.70586e+06	MS/MS	STY:79.9663@AT(0.2000)S(0.2000)S(0.2000)T(0.2000)QS(0.2000)LAR;
ATVTPSPVK	AT[79.9663]VTPSPVK	K	G	176	184	9	2	2T(79.9663)	sp|Q9H1E3|NUCKS_HUMAN	Q9H1E3	NUCKS_HUMAN	NUCKS1	Nuclear ubiquitous casein and cyclin-dependent kinase substrate 1			15	8.5512728E7	MS/MS	STY:79.9663@AT(0.4898)VT(0.4898)PS(0.0204)PVK;
ATVTPSPVK	AT[79.9663]VTPS[79.9663]PVK	K	G	176	184	9	2	2T(79.9663),6S(79.9663)	sp|Q9H1E3|NUCKS_HUMAN	Q9H1E3	NUCKS_HUMAN	NUCKS1	Nuclear ubiquitous casein and cyclin-dependent kinase substrate 1			1	717838	MS/MS	STY:79.9663@AT(0.6580)VT(0.6580)PS(0.6840)PVK;
ATVTPSPVK	AT[79.9663]VT[79.9663]PSPVK	K	G	176	184	9	2	2T(79.9663),4T(79.9663)	sp|Q9H1E3|NUCKS_HUMAN	Q9H1E3	NUCKS_HUMAN	NUCKS1	Nuclear ubiquitous casein and cyclin-dependent kinase substrate 1			1	1.16676e+06	MS/MS	STY:79.9663@AT(0.6667)VT(0.6667)PS(0.6667)PVK;
AVASPEATVSQTDENK	AVAS[79.9663]PEATVSQTDENK	K	A	495	510	16	2	4S(79.9663)	sp|Q641Q2|WAC2A_HUMAN	Q641Q2	WAC2A_HUMAN	WASHC2A	WASH complex subunit 2A	WASHC2C	sp|Q9Y4E1|WAC2C_HUMAN	1	666589	MS/MS	STY:79.9663@AVAS(0.2500)PEAT(0.2500)VS(0.2500)QT(0.2500)DENK;
AVDITTPK	AVDIT[79.9663]TPK	K	A	136	143	8	2	5T(79.9663)	sp|O75475|PSIP1_HUMAN	O75475	PSIP1_HUMAN	PSIP1	PC4 and SFRS1-interacting protein			2	842538	MS/MS	STY:79.9663@AVDIT(0.5000)T(0.5000)PK;
AVPIGTPPK	AVPIGT[79.9663]PPK	R	Q	189	197	9	2	6T(79.9663)	sp|Q86TB9|PATL1_HUMAN	Q86TB9	PATL1_HUMAN	PATL1	Protein PAT1 homolog 1			2	0	MS/MS	STY:79.9663@AVPIGT(1.0000)PPK;
AVPMAPAPASPGSSNDSSAR	AVPM[15.9949]APAPAS[79.9663]PGSSNDSSAR	K	S	750	769	20	2	10S(79.9663),4M(15.9949)	sp|Q66K74|MAP1S_HUMAN	Q66K74	MAP1S_HUMAN	MAP1S	Microtubule-associated protein 1S			1	425422	MS/MS	STY:79.9663@AVPMAPAPAS(0.3232)PGS(0.3232)S(0.3232)NDS(0.0151)S(0.0151)AR;M:15.9949@AVPM(1.0000)APAPASPGSSNDSSAR;
AVPPVSPELR	AVPPVS[79.9663]PELR	K	K	411	420	10	2	6S(79.9663)	sp|Q96JM3|CHAP1_HUMAN	Q96JM3	CHAP1_HUMAN	CHAMP1	Chromosome alignment-maintaining phosphoprotein 1			3	617834	MS/MS	STY:79.9663@AVPPVS(1.0000)PELR;
AVPVESPVQKV	AVPVES[79.9663]PVQKV	K	-	422	432	11	2	6S(79.9663)	sp|Q8TB61|S35B2_HUMAN	Q8TB61	S35B2_HUMAN	SLC35B2	Adenosine 3'-phospho 5'-phosphosulfate transporter 1			1	394838	MS/MS	STY:79.9663@AVPVES(1.0000)PVQKV;
AVSLDSPVSVGSSPPVK	AVSLDS[79.9663]PVSVGSSPPVK	R	N	855	871	17	2	6S(79.9663)	sp|Q9Y6Q9|NCOA3_HUMAN	Q9Y6Q9	NCOA3_HUMAN	NCOA3	Nuclear receptor coactivator 3			1	1.04742e+06	MS/MS	STY:79.9663@AVS(0.0235)LDS(0.9174)PVS(0.0286)VGS(0.0156)S(0.0149)PPVK;
AVSEGCASEDEVEGEA	AVS[79.9663]EGC[57.0215]ASEDEVEGEA	R	-	913	928	16	2	3S(79.9663),6C(57.0215)	sp|Q9BYX2|TBD2A_HUMAN	Q9BYX2	TBD2A_HUMAN	TBC1D2	TBC1 domain family member 2A			2	3.73633e+06	MS/MS	STY:79.9663@AVS(0.5000)EGCAS(0.5000)EDEVEGEA;
AVSLDSPVSVGSSPPVK	AVS[79.9663]LDSPVSVGSSPPVK	R	N	855	871	17	2	3S(79.9663)	sp|Q9Y6Q9|NCOA3_HUMAN	Q9Y6Q9	NCOA3_HUMAN	NCOA3	Nuclear receptor coactivator 3			1	1.04742e+06	MS/MS	STY:79.9663@AVS(0.9213)LDS(0.0144)PVS(0.0214)VGS(0.0214)S(0.0214)PPVK;
AVSPAPQSSSR	AVS[79.9663]PAPQSSSR	R	L	740	750	11	2	3S(79.9663)	sp|Q9P275|UBP36_HUMAN	Q9P275	UBP36_HUMAN	USP36	Ubiquitin carboxyl-terminal hydrolase 36			1	359570	MS/MS	STY:79.9663@AVS(0.9424)PAPQS(0.0187)S(0.0187)S(0.0201)R;
AVSPAVPFSR	AVS[79.9663]PAVPFSR	R	S	766	775	10	2	3S(79.9663)	sp|Q96RK0|CIC_HUMAN	Q96RK0	CIC_HUMAN	CIC	Protein capicua homolog			1	269172	MS/MS	STY:79.9663@AVS(0.9445)PAVPFS(0.0555)R;
AVSPPHLDGPPSPR	AVS[79.9663]PPHLDGPPS[79.9663]PR	K	S	516	529	14	2	12S(79.9663),3S(79.9663)	sp|P29590|PML_HUMAN	P29590	PML_HUMAN	PML	Protein PML			1	1.08132e+06	MS/MS	STY:79.9663@AVS(1.0000)PPHLDGPPS(1.0000)PR;
AVSPSNPK	AVS[79.9663]PSNPK	R	A	313	320	8	2	3S(79.9663)	sp|Q14244|MAP7_HUMAN	Q14244	MAP7_HUMAN	MAP7	Ensconsin			1	521183	MS/MS	STY:79.9663@AVS(0.5000)PS(0.5000)NPK;
AVTIANSPSK	AVTIANSPS[79.9663]K	K	P	197	206	10	2	9S(79.9663)	sp|Q8NEF9|SRFB1_HUMAN	Q8NEF9	SRFB1_HUMAN	SRFBP1	Serum response factor-binding protein 1			1	212287	MS/MS	STY:79.9663@AVT(0.0793)IANS(0.0793)PS(0.8414)K;
AVTTVTQSTPVPGPSVPPPEELQVSPGPR	AVTTVTQSTPVPGPSVPPPEELQVS[79.9663]PGPR	R	Q	1483	1511	29	3	25S(79.9663)	sp|P51610|HCFC1_HUMAN	P51610	HCFC1_HUMAN	HCFC1	Host cell factor 1			1	2.07131e+06	MS/MS	STY:79.9663@AVT(0.0212)T(0.0212)VT(0.0241)QS(0.0139)T(0.0139)PVPGPS(0.0139)VPPPEELQVS(0.8919)PGPR;
AVTIANSPSK	AVT[79.9663]IANSPSK	K	P	197	206	10	2	3T(79.9663)	sp|Q8NEF9|SRFB1_HUMAN	Q8NEF9	SRFB1_HUMAN	SRFBP1	Serum response factor-binding protein 1			3	1.15681e+06	MS/MS	STY:79.9663@AVT(0.4831)IANS(0.4831)PS(0.0337)K;
AVTIANSPSKPSEK	AVT[79.9663]IANSPSKPSEK	K	D	197	210	14	2	3T(79.9663)	sp|Q8NEF9|SRFB1_HUMAN	Q8NEF9	SRFB1_HUMAN	SRFBP1	Serum response factor-binding protein 1			1	326496	MS/MS	STY:79.9663@AVT(0.2500)IANS(0.2500)PS(0.2500)KPS(0.2500)EK;
AVTPVPTK	AVT[79.9663]PVPTK	R	T	524	531	8	2	3T(79.9663)	sp|Q6PKG0|LARP1_HUMAN	Q6PKG0	LARP1_HUMAN	LARP1	La-related protein 1			1	638165	MS/MS	STY:79.9663@AVT(0.9411)PVPT(0.0589)K;
AVTTPGK	AVT[79.9663]TPGK	K	K	103	109	7	2	3T(79.9663)	sp|P19338|NUCL_HUMAN	P19338	NUCL_HUMAN	NCL	Nucleolin			1	151389	MS/MS	STY:79.9663@AVT(0.5000)T(0.5000)PGK;
AVTTPGKK	AVT[79.9663]TPGKK	K	G	103	110	8	2	3T(79.9663)	sp|P19338|NUCL_HUMAN	P19338	NUCL_HUMAN	NCL	Nucleolin			4	2.35342e+06	MS/MS	STY:79.9663@AVT(0.5000)T(0.5000)PGKK;
AVTTVTQSTPVPGPSVPPPEELQVSPGPR	AVT[79.9663]TVTQSTPVPGPSVPPPEELQVSPGPR	R	Q	1483	1511	29	3	3T(79.9663)	sp|P51610|HCFC1_HUMAN	P51610	HCFC1_HUMAN	HCFC1	Host cell factor 1			1	2.07131e+06	MS/MS	STY:79.9663@AVT(0.1662)T(0.1662)VT(0.1662)QS(0.1662)T(0.1662)PVPGPS(0.1662)VPPPEELQVS(0.0028)PGPR;
AYLGYQAVPSGSSGSLSTSSSSSPPGTPSPADAK	AYLGYQAVPSGSSGSLSTSSSSSPPGT[79.9663]PSPADAK	R	A	209	242	34	3	27T(79.9663)	sp|P17676|CEBPB_HUMAN	P17676	CEBPB_HUMAN	CEBPB	CCAAT/enhancer-binding protein beta			1	8076842	MS/MS	STY:79.9663@AY(0.1064)LGY(0.1302)QAVPS(0.0571)GS(0.0571)S(0.0571)GS(0.0571)LS(0.0571)T(0.0026)S(0.0026)S(0.0028)S(0.0033)S(0.0033)S(0.0033)PPGT(0.4551)PS(0.0050)PADAK;
AYLGYQAVPSGSSGSLSTSSSSSPPGTPSPADAK	AYLGYQAVPSGSSGSLSTSSSSS[79.9663]PPGTPSPADAK	R	A	209	242	34	3	23S(79.9663)	sp|P17676|CEBPB_HUMAN	P17676	CEBPB_HUMAN	CEBPB	CCAAT/enhancer-binding protein beta			2	5275472	MS/MS	STY:79.9663@AY(0.0045)LGY(0.0045)QAVPS(0.0045)GS(0.0045)S(0.0045)GS(0.0045)LS(0.0045)T(0.0046)S(0.0046)S(0.0046)S(0.0046)S(0.0047)S(0.9369)PPGT(0.0043)PS(0.0043)PADAK;
AYLGYQAVPSGSSGSLSTSSSSSPPGTPSPADAK	AYLGYQAVPSGSSGSLSTSSSS[79.9663]SPPGTPSPADAK	R	A	209	242	34	3	22S(79.9663)	sp|P17676|CEBPB_HUMAN	P17676	CEBPB_HUMAN	CEBPB	CCAAT/enhancer-binding protein beta			1	7397486	MS/MS	STY:79.9663@AY(0.0142)LGY(0.0062)QAVPS(0.0041)GS(0.0041)S(0.0041)GS(0.0044)LS(0.0044)T(0.0044)S(0.0044)S(0.0044)S(0.0044)S(0.4234)S(0.4234)PPGT(0.0168)PS(0.0776)PADAK;
AYLGYQAVPSGSSGSLSTSSSSSPPGTPSPADAK	AYLGYQAVPSGSSGSLSTSS[79.9663]SSSPPGTPSPADAK	R	A	209	242	34	3	20S(79.9663)	sp|P17676|CEBPB_HUMAN	P17676	CEBPB_HUMAN	CEBPB	CCAAT/enhancer-binding protein beta			1	4820369	MS/MS	STY:79.9663@AY(0.0069)LGY(0.0069)QAVPS(0.0059)GS(0.0059)S(0.0059)GS(0.0059)LS(0.0035)T(0.0035)S(0.0035)S(0.2367)S(0.2367)S(0.2367)S(0.2367)PPGT(0.0027)PS(0.0027)PADAK;
AYLGYQAVPSGSSGSLSTSSSSSPPGTPSPADAK	AYLGYQAVPSGSSGSLSTS[79.9663]SSSSPPGTPSPADAK	R	A	209	242	34	3	19S(79.9663)	sp|P17676|CEBPB_HUMAN	P17676	CEBPB_HUMAN	CEBPB	CCAAT/enhancer-binding protein beta			1	8076842	MS/MS	STY:79.9663@AY(0.0091)LGY(0.0013)QAVPS(0.0014)GS(0.0014)S(0.0014)GS(0.0015)LS(0.0015)T(0.0015)S(0.1401)S(0.1401)S(0.1401)S(0.1401)S(0.1401)PPGT(0.1401)PS(0.1401)PADAK;
AYLGYQAVPSGSSGSLSTSSSSSPPGTPSPADAK	AYLGYQAVPSGSS[79.9663]GSLSTSSSSSPPGTPSPADAK	R	A	209	242	34	3	13S(79.9663)	sp|P17676|CEBPB_HUMAN	P17676	CEBPB_HUMAN	CEBPB	CCAAT/enhancer-binding protein beta			1	5275472	MS/MS	STY:79.9663@AY(0.0046)LGY(0.0046)QAVPS(0.0046)GS(0.0046)S(0.7423)GS(0.0277)LS(0.0277)T(0.0277)S(0.0277)S(0.0277)S(0.0277)S(0.0277)S(0.0277)PPGT(0.0090)PS(0.0090)PADAK;
AYLGYQAVPSGSSGSLSTSSSSSPPGTPSPADAK	AYLGYQAVPS[79.9663]GSSGSLSTSSSSSPPGTPSPADAK	R	A	209	242	34	3	10S(79.9663)	sp|P17676|CEBPB_HUMAN	P17676	CEBPB_HUMAN	CEBPB	CCAAT/enhancer-binding protein beta			1	7397486	MS/MS	STY:79.9663@AY(0.0096)LGY(0.0096)QAVPS(0.3068)GS(0.0030)S(0.0030)GS(0.0299)LS(0.0299)T(0.0140)S(0.0140)S(0.0140)S(0.0140)S(0.1380)S(0.1380)PPGT(0.1380)PS(0.1380)PADAK;
AYLGYQAVPSGSSGSLSTSSSSSPPGTPSPADAK	AYLGY[79.9663]QAVPSGSSGSLSTSSSSSPPGTPSPADAK	R	A	209	242	34	3	5Y(79.9663)	sp|P17676|CEBPB_HUMAN	P17676	CEBPB_HUMAN	CEBPB	CCAAT/enhancer-binding protein beta			2	1.2672958E7	MS/MS	STY:79.9663@AY(0.0078)LGY(0.8862)QAVPS(0.0063)GS(0.0063)S(0.0063)GS(0.0063)LS(0.0057)T(0.0045)S(0.0045)S(0.0114)S(0.0110)S(0.0167)S(0.0167)PPGT(0.0052)PS(0.0052)PADAK;
AYQDQISPVPGAPK	AY[79.9663]QDQISPVPGAPK	R	A	379	392	14	2	2Y(79.9663)	sp|Q969V6|MRTFA_HUMAN	Q969V6	MRTFA_HUMAN	MRTFA	Myocardin-related transcription factor A			1	804841	MS/MS	STY:79.9663@AY(0.5000)QDQIS(0.5000)PVPGAPK;
AYSFCGTVEYMAPEVVNR	AY[79.9663]SFC[57.0215]GTVEYMAPEVVNR	K	R	225	242	18	3	2Y(79.9663),5C(57.0215)	sp|P51812|KS6A3_HUMAN	P51812	KS6A3_HUMAN	RPS6KA3	Ribosomal protein S6 kinase alpha-3	RPS6KA1, RPS6KA6	sp|Q15418|KS6A1_HUMAN, sp|Q9UK32|KS6A6_HUMAN	1	130453	MS/MS	STY:79.9663@AY(0.2500)S(0.2500)FCGT(0.2500)VEY(0.2500)MAPEVVNR;
CALSSPSLAFTPPIK	C[57.0215]ALS[79.9663]SPSLAFTPPIK	R	T	255	269	15	2	1C(57.0215),4S(79.9663)	sp|Q8NFH5|NUP35_HUMAN	Q8NFH5	NUP35_HUMAN	NUP35	Nucleoporin NUP35			1	548424	MS/MS	STY:79.9663@CALS(0.3305)S(0.3305)PS(0.3305)LAFT(0.0084)PPIK;
CAPSAGSPAAAVGR	C[57.0215]APS[79.9663]AGSPAAAVGR	R	E	54	67	14	2	1C(57.0215),4S(79.9663)	sp|Q7L2J0|MEPCE_HUMAN	Q7L2J0	MEPCE_HUMAN	MEPCE	7SK snRNA methylphosphate capping enzyme			2	847946	MS/MS	STY:79.9663@CAPS(0.5000)AGS(0.5000)PAAAVGR;
CDILVQEELLASPK	C[57.0215]DILVQEELLAS[79.9663]PK	K	K	592	605	14	2	12S(79.9663),1C(57.0215)	sp|Q96JM3|CHAP1_HUMAN	Q96JM3	CHAP1_HUMAN	CHAMP1	Chromosome alignment-maintaining phosphoprotein 1			1	0	MS/MS	STY:79.9663@CDILVQEELLAS(1.0000)PK;
CDSSPDSAEDVRK	C[57.0215]DSSPDS[79.9663]AEDVRK	K	V	132	144	13	2,3	1C(57.0215),7S(79.9663)	sp|P02765|FETUA_HUMAN	P02765	FETUA_HUMAN	AHSG	Alpha-2-HS-glycoprotein			2	1.14125e+06	MS/MS	STY:79.9663@CDS(0.0368)S(0.0368)PDS(0.9265)AEDVRK;
CDSSPDSAEDVR	C[57.0215]DS[79.9663]SPDSAEDVR	K	K	132	143	12	2	1C(57.0215),3S(79.9663)	sp|P02765|FETUA_HUMAN	P02765	FETUA_HUMAN	AHSG	Alpha-2-HS-glycoprotein			2	1.36903e+06	MS/MS	STY:79.9663@CDS(0.3333)S(0.3333)PDS(0.3333)AEDVR;
CDSSPDSAEDVRK	C[57.0215]DS[79.9663]SPDSAEDVRK	K	V	132	144	13	2,3	1C(57.0215),3S(79.9663)	sp|P02765|FETUA_HUMAN	P02765	FETUA_HUMAN	AHSG	Alpha-2-HS-glycoprotein			8	3014214	MS/MS	STY:79.9663@CDS(0.4852)S(0.4852)PDS(0.0295)AEDVRK;
CGSGPVHISGQHLVAVEEDAESEDEEEEDVK	C[57.0215]GSGPVHISGQHLVAVEEDAES[79.9663]EDEEEEDVK	K	L	104	134	31	3,4	1C(57.0215),22S(79.9663)	sp|P06748|NPM_HUMAN	P06748	NPM_HUMAN	NPM1	Nucleophosmin			23	2.6560316E7	MS/MS	STY:79.9663@CGS(0.0286)GPVHIS(0.0292)GQHLVAVEEDAES(0.9422)EDEEEEDVK;
CGSGPVHISGQHLVAVEEDAESEDEEEEDVK	C[57.0215]GSGPVHIS[79.9663]GQHLVAVEEDAESEDEEEEDVK	K	L	104	134	31	4	1C(57.0215),9S(79.9663)	sp|P06748|NPM_HUMAN	P06748	NPM_HUMAN	NPM1	Nucleophosmin			1	1.66615e+06	MS/MS	STY:79.9663@CGS(0.0930)GPVHIS(0.8407)GQHLVAVEEDAES(0.0663)EDEEEEDVK;
CGSGPVHISGQHLVAVEEDAESEDEEEEDVK	C[57.0215]GS[79.9663]GPVHISGQHLVAVEEDAESEDEEEEDVK	K	L	104	134	31	3,4	1C(57.0215),3S(79.9663)	sp|P06748|NPM_HUMAN	P06748	NPM_HUMAN	NPM1	Nucleophosmin			4	1.9369258E7	MS/MS	STY:79.9663@CGS(0.7340)GPVHIS(0.1902)GQHLVAVEEDAES(0.0759)EDEEEEDVK;
CLSPDDSTVK	C[57.0215]LS[79.9663]PDDSTVK	R	M	984	993	10	2	1C(57.0215),3S(79.9663)	sp|P78559|MAP1A_HUMAN	P78559	MAP1A_HUMAN	MAP1A	Microtubule-associated protein 1A			1	272881	MS/MS	STY:79.9663@CLS(0.3333)PDDS(0.3333)T(0.3333)VK;
CPSPTMSLPSSWK	C[57.0215]PS[79.9663]PTMSLPSSWK	R	Y	752	764	13	2	1C(57.0215),3S(79.9663)	sp|Q8N3V7|SYNPO_HUMAN	Q8N3V7	SYNPO_HUMAN	SYNPO	Synaptopodin			1	473284	MS/MS	STY:79.9663@CPS(0.9402)PT(0.0158)MS(0.0158)LPS(0.0141)S(0.0141)WK;
CPTEVLLTPPTPLPPPSPPPTASDR	C[57.0215]PTEVLLTPPTPLPPPS[79.9663]PPPTASDR	K	G	62	86	25	3	17S(79.9663),1C(57.0215)	sp|Q6ZMT1|STAC2_HUMAN	Q6ZMT1	STAC2_HUMAN	STAC2	SH3 and cysteine-rich domain-containing protein 2			2	1.52863e+06	MS/MS	STY:79.9663@CPT(0.0161)EVLLT(0.0059)PPT(0.0059)PLPPPS(0.3240)PPPT(0.3240)AS(0.3240)DR;
CQTAEADSESDHEVPEPESEMK	C[57.0215]QT[79.9663]AEADSESDHEVPEPESEMK	R	M	966	987	22	3	1C(57.0215),3T(79.9663)	sp|Q9BPX3|CND3_HUMAN	Q9BPX3	CND3_HUMAN	NCAPG	Condensin complex subunit 3			1	229501	MS/MS	STY:79.9663@CQT(0.3277)AEADS(0.3277)ES(0.3277)DHEVPEPES(0.0168)EMK;
CSGPGLSPGMVR	C[57.0215]SGPGLS[79.9663]PGMVR	K	A	1453	1464	12	2	1C(57.0215),7S(79.9663)	sp|P21333|FLNA_HUMAN	P21333	FLNA_HUMAN	FLNA	Filamin-A			5	1.4019556E7	MS/MS	STY:79.9663@CS(0.0537)GPGLS(0.9463)PGMVR;
CSVSLSNVEAR	C[57.0215]SVSLS[79.9663]NVEAR	R	R	726	736	11	2	1C(57.0215),6S(79.9663)	sp|P47712|PA24A_HUMAN	P47712	PA24A_HUMAN	PLA2G4A	Cytosolic phospholipase A2			2	1.129347E7	MS/MS	STY:79.9663@CS(0.0278)VS(0.0288)LS(0.9434)NVEAR;
CSVSLSNVEAR	C[57.0215]SVS[79.9663]LSNVEAR	R	R	726	736	11	2	1C(57.0215),4S(79.9663)	sp|P47712|PA24A_HUMAN	P47712	PA24A_HUMAN	PLA2G4A	Cytosolic phospholipase A2			2	1.129347E7	MS/MS	STY:79.9663@CS(0.0425)VS(0.9300)LS(0.0275)NVEAR;
CSGPGLSPGMVR	C[57.0215]S[79.9663]GPGLSPGMVR	K	A	1453	1464	12	2	1C(57.0215),2S(79.9663)	sp|P21333|FLNA_HUMAN	P21333	FLNA_HUMAN	FLNA	Filamin-A			2	1.4019556E7	MS/MS	STY:79.9663@CS(0.9426)GPGLS(0.0574)PGMVR;
CSPGSPTDPNATLSK	C[57.0215]S[79.9663]PGSPTDPNATLSK	K	D	42	56	15	2	1C(57.0215),2S(79.9663)	sp|Q9P0K8|FOXJ2_HUMAN	Q9P0K8	FOXJ2_HUMAN	FOXJ2	Forkhead box protein J2			2	0	MS/MS	STY:79.9663@CS(0.3252)PGS(0.3252)PT(0.3252)DPNAT(0.0123)LS(0.0123)K;
CSPTVAFVEFPSSPQLK	C[57.0215]S[79.9663]PTVAFVEFPSSPQLK	R	N	669	685	17	2	1C(57.0215),2S(79.9663)	sp|Q9UPQ0|LIMC1_HUMAN	Q9UPQ0	LIMC1_HUMAN	LIMCH1	LIM and calponin homology domains-containing protein 1			1	2.08199e+06	MS/MS	STY:79.9663@CS(0.4836)PT(0.4836)VAFVEFPS(0.0164)S(0.0164)PQLK;
CSVCPDYDLCSVCEGK	C[57.0215]S[79.9663]VC[57.0215]PDYDLC[57.0215]SVC[57.0215]EGK	K	G	142	157	16	2	10C(57.0215),13C(57.0215),1C(57.0215),2S(79.9663),4C(57.0215)	sp|Q13501|SQSTM_HUMAN	Q13501	SQSTM_HUMAN	SQSTM1	Sequestosome-1			1	0	MS/MS	STY:79.9663@CS(0.6042)VCPDY(0.0279)DLCS(0.3680)VCEGK;
CSVSLSNVEAR	C[57.0215]S[79.9663]VSLSNVEAR	R	R	726	736	11	2	1C(57.0215),2S(79.9663)	sp|P47712|PA24A_HUMAN	P47712	PA24A_HUMAN	PLA2G4A	Cytosolic phospholipase A2			4	1.129347E7	MS/MS	STY:79.9663@CS(0.9216)VS(0.0516)LS(0.0269)NVEAR;
CVSVQTDPTDEIPTK	C[57.0215]VSVQTDPT[79.9663]DEIPTK	R	K	92	106	15	2	1C(57.0215),9T(79.9663)	sp|P18583|SON_HUMAN	P18583	SON_HUMAN	SON	Protein SON			1	1.82226e+06	MS/MS	STY:79.9663@CVS(0.2791)VQT(0.0687)DPT(0.3261)DEIPT(0.3261)K;
CVSMPGDISGLQGGPR	C[57.0215]VS[79.9663]MPGDISGLQGGPR	R	S	418	433	16	2	1C(57.0215),3S(79.9663)	sp|Q8IY17|PLPL6_HUMAN	Q8IY17	PLPL6_HUMAN	PNPLA6	Patatin-like phospholipase domain-containing protein 6			1	0	MS/MS	STY:79.9663@CVS(0.9461)MPGDIS(0.0539)GLQGGPR;
CVSVQTDPTDEIPTK	C[57.0215]VS[79.9663]VQTDPTDEIPTK	R	K	92	106	15	2	1C(57.0215),3S(79.9663)	sp|P18583|SON_HUMAN	P18583	SON_HUMAN	SON	Protein SON			3	1.82226e+06	MS/MS	STY:79.9663@CVS(0.9442)VQT(0.0189)DPT(0.0184)DEIPT(0.0184)K;
DADSQNPDAPEGK	DADS[79.9663]QNPDAPEGK	K	R	399	411	13	2	4S(79.9663)	sp|P53621|COPA_HUMAN	P53621	COPA_HUMAN	COPA	Coatomer subunit alpha			2	1276778	MS/MS	STY:79.9663@DADS(1.0000)QNPDAPEGK;
DAEQSGSPR	DAEQS[79.9663]GSPR	R	T	188	196	9	2	5S(79.9663)	sp|P08651|NFIC_HUMAN	P08651	NFIC_HUMAN	NFIC	Nuclear factor 1 C-type			1	296591	MS/MS	STY:79.9663@DAEQS(0.5000)GS(0.5000)PR;
DAGDPSPPNK	DAGDPS[79.9663]PPNK	R	M	48	57	10	2	6S(79.9663)	sp|Q9BTA9|WAC_HUMAN	Q9BTA9	WAC_HUMAN	WAC	WW domain-containing adapter protein with coiled-coil			3	499049	MS/MS	STY:79.9663@DAGDPS(1.0000)PPNK;
DAGGPRPESPVPAGR	DAGGPRPES[79.9663]PVPAGR	R	A	8	22	15	2	9S(79.9663)	sp|Q9BVG9|PTSS2_HUMAN	Q9BVG9	PTSS2_HUMAN	PTDSS2	Phosphatidylserine synthase 2			1	564832	MS/MS	STY:79.9663@DAGGPRPES(1.0000)PVPAGR;
DAHDVSPTSTDTEAQLTVER	DAHDVS[79.9663]PTSTDTEAQLTVER	R	Q	289	308	20	3	6S(79.9663)	sp|Q8IVF2|AHNK2_HUMAN	Q8IVF2	AHNK2_HUMAN	AHNAK2	Protein AHNAK2			2	566174	MS/MS	STY:79.9663@DAHDVS(0.1992)PT(0.1992)S(0.1992)T(0.1992)DT(0.1992)EAQLT(0.0042)VER;
DALGDSLQVPVSPSSTTSSR	DALGDSLQVPVSPSST[79.9663]TSSR	R	C	372	391	20	2	16T(79.9663)	sp|Q9Y2D5|PLAK2_HUMAN	Q9Y2D5	PLAK2_HUMAN	PALM2AKAP2	PALM2-AKAP2 fusion protein			2	3.85483e+06	MS/MS	STY:79.9663@DALGDS(0.0042)LQVPVS(0.0043)PS(0.0043)S(0.0043)T(0.2457)T(0.2457)S(0.2457)S(0.2457)R;
DALGDSLQVPVSPSSTTSSR	DALGDSLQVPVS[79.9663]PSSTTSSR	R	C	372	391	20	2	12S(79.9663)	sp|Q9Y2D5|PLAK2_HUMAN	Q9Y2D5	PLAK2_HUMAN	PALM2AKAP2	PALM2-AKAP2 fusion protein			2	3.85483e+06	MS/MS	STY:79.9663@DALGDS(0.0086)LQVPVS(0.9431)PS(0.0081)S(0.0081)T(0.0081)T(0.0081)S(0.0081)S(0.0081)R;
DAPTSPASVASSSSTPSSK	DAPT[79.9663]SPASVASSSSTPSSK	K	T	282	300	19	2	4T(79.9663)	sp|Q04726|TLE3_HUMAN	Q04726	TLE3_HUMAN	TLE3	Transducin-like enhancer protein 3			7	4.61658e+06	MS/MS	STY:79.9663@DAPT(0.4777)S(0.4777)PAS(0.0056)VAS(0.0056)S(0.0056)S(0.0056)S(0.0056)T(0.0056)PS(0.0056)S(0.0056)K;
DAQRLSPIPEEVPK	DAQRLS[79.9663]PIPEEVPK	K	S	599	612	14	2,3	6S(79.9663)	sp|Q96T23|RSF1_HUMAN	Q96T23	RSF1_HUMAN	RSF1	Remodeling and spacing factor 1			10	2.42705e+06	MS/MS	STY:79.9663@DAQRLS(1.0000)PIPEEVPK;
DASPINR	DAS[79.9663]PINR	K	W	429	435	7	2	3S(79.9663)	sp|Q13523|PRP4K_HUMAN	Q13523	PRP4K_HUMAN	PRP4K	Serine/threonine-protein kinase PRP4 homolog			4	1.09668e+06	MS/MS	STY:79.9663@DAS(1.0000)PINR;
DDDDIDLFGSDDEEESEEAK	DDDDIDLFGSDDEEES[79.9663]EEAK	K	R	97	116	20	2	16S(79.9663)	sp|P24534|EF1B_HUMAN	P24534	EF1B_HUMAN	EEF1B2	Elongation factor 1-beta			8	1.84609088E8	MS/MS	STY:79.9663@DDDDIDLFGS(0.0539)DDEEES(0.9461)EEAK;
DDDDIDLFGSDDEEESEEAKR	DDDDIDLFGSDDEEES[79.9663]EEAKR	K	L	97	117	21	2,3	16S(79.9663)	sp|P24534|EF1B_HUMAN	P24534	EF1B_HUMAN	EEF1B2	Elongation factor 1-beta			4	1.5901531E7	MS/MS	STY:79.9663@DDDDIDLFGS(0.0586)DDEEES(0.9414)EEAKR;
DDDDIDLFGSDDEEESEEAK	DDDDIDLFGS[79.9663]DDEEESEEAK	K	R	97	116	20	2,3	10S(79.9663)	sp|P24534|EF1B_HUMAN	P24534	EF1B_HUMAN	EEF1B2	Elongation factor 1-beta			19	2.01202672E8	MS/MS	STY:79.9663@DDDDIDLFGS(0.9469)DDEEES(0.0531)EEAK;
DDDDIDLFGSDDEEESEEAKR	DDDDIDLFGS[79.9663]DDEEESEEAKR	K	L	97	117	21	2,3	10S(79.9663)	sp|P24534|EF1B_HUMAN	P24534	EF1B_HUMAN	EEF1B2	Elongation factor 1-beta			14	1.5901531E7	MS/MS	STY:79.9663@DDDDIDLFGS(0.9458)DDEEES(0.0542)EEAKR;
DDFESEEEDVK	DDFES[79.9663]EEEDVK	K	S	1324	1334	11	2	5S(79.9663)	sp|Q7Z6E9|RBBP6_HUMAN	Q7Z6E9	RBBP6_HUMAN	RBBP6	E3 ubiquitin-protein ligase RBBP6			3	2.82684e+06	MS/MS	STY:79.9663@DDFES(1.0000)EEEDVK;
DDGDEEGLLTHSEEELEHSQDTDADDGALQ	DDGDEEGLLT[79.9663]HSEEELEHSQDTDADDGALQ	R	-	277	306	30	3	10T(79.9663)	sp|Q9UKM9|RALY_HUMAN	Q9UKM9	RALY_HUMAN	RALY	RNA-binding protein Raly			1	0	MS/MS	STY:79.9663@DDGDEEGLLT(0.5759)HS(0.0189)EEELEHS(0.2026)QDT(0.2026)DADDGALQ;
DDGVFVQEVTQNSPAAR	DDGVFVQEVT[79.9663]QNSPAAR	R	T	29	45	17	3	10T(79.9663)	sp|Q09666|AHNK_HUMAN	Q09666	AHNK_HUMAN	AHNAK	Neuroblast differentiation-associated protein AHNAK			1	0	MS/MS	STY:79.9663@DDGVFVQEVT(0.5000)QNS(0.5000)PAAR;
DDQEWESPSPPKPTVFISGVIAR	DDQEWES[79.9663]PSPPKPTVFISGVIAR	K	G	43	65	23	3	7S(79.9663)	sp|P51397|DAP1_HUMAN	P51397	DAP1_HUMAN	DAP	Death-associated protein 1			4	1138263	MS/MS	STY:79.9663@DDQEWES(0.3278)PS(0.3278)PPKPT(0.3278)VFIS(0.0166)GVIAR;
DDSHSAEDSEDEK	DDSHSAEDS[79.9663]EDEK	K	E	71	83	13	2	9S(79.9663)	sp|Q9H1E3|NUCKS_HUMAN	Q9H1E3	NUCKS_HUMAN	NUCKS1	Nuclear ubiquitous casein and cyclin-dependent kinase substrate 1			3	1.61608e+06	MS/MS	STY:79.9663@DDS(0.0334)HS(0.0334)AEDS(0.9332)EDEK;
DDSHSAEDSEDEK	DDSHS[79.9663]AEDSEDEK	K	E	71	83	13	2	5S(79.9663)	sp|Q9H1E3|NUCKS_HUMAN	Q9H1E3	NUCKS_HUMAN	NUCKS1	Nuclear ubiquitous casein and cyclin-dependent kinase substrate 1			1	1.61608e+06	MS/MS	STY:79.9663@DDS(0.0499)HS(0.8716)AEDS(0.0785)EDEK;
DEALSDGDDLR	DEALS[79.9663]DGDDLR	K	D	90	100	11	2	5S(79.9663)	sp|Q01831|XPC_HUMAN	Q01831	XPC_HUMAN	XPC	DNA repair protein complementing XP-C cells			1	652905	MS/MS	STY:79.9663@DEALS(1.0000)DGDDLR;
DEALSDGDDLRDFPSDLK	DEALS[79.9663]DGDDLRDFPSDLK	K	K	90	107	18	3	5S(79.9663)	sp|Q01831|XPC_HUMAN	Q01831	XPC_HUMAN	XPC	DNA repair protein complementing XP-C cells			2	1.07887e+06	MS/MS	STY:79.9663@DEALS(0.9310)DGDDLRDFPS(0.0690)DLK;
DEDEDEDVASPDGLGR	DEDEDEDVAS[79.9663]PDGLGR	K	L	540	555	16	2	10S(79.9663)	sp|O95365|ZBT7A_HUMAN	O95365	ZBT7A_HUMAN	ZBTB7A	Zinc finger and BTB domain-containing protein 7A			1	0	MS/MS	STY:79.9663@DEDEDEDVAS(1.0000)PDGLGR;
DEEDGKDSDEAEDAELYDDLYCPACDK	DEEDGKDS[79.9663]DEAEDAELYDDLYC[57.0215]PAC[57.0215]DK	K	S	295	321	27	3	22C(57.0215),25C(57.0215),8S(79.9663)	sp|Q5F1R6|DJC21_HUMAN	Q5F1R6	DJC21_HUMAN	DNAJC21	DnaJ homolog subfamily C member 21			2	0	MS/MS	STY:79.9663@DEEDGKDS(0.9243)DEAEDAELY(0.0434)DDLY(0.0322)CPACDK;
DEEQSEADAGSGPPTPGPTTLGPK	DEEQSEADAGS[79.9663]GPPTPGPTTLGPK	R	K	558	581	24	3	11S(79.9663)	sp|Q6ZRS2|SRCAP_HUMAN	Q6ZRS2	SRCAP_HUMAN	SRCAP	Helicase SRCAP			1	384012	MS/MS	STY:79.9663@DEEQS(0.0137)EADAGS(0.4187)GPPT(0.4187)PGPT(0.0745)T(0.0745)LGPK;
DEETEDVLASNGYESDEQEK	DEETEDVLASNGY[79.9663]ESDEQEK	K	S	532	551	20	2	13Y(79.9663)	sp|Q96JG6|VPS50_HUMAN	Q96JG6	VPS50_HUMAN	VPS50	Syndetin			1	1.27848e+06	MS/MS	STY:79.9663@DEET(0.0366)EDVLAS(0.0146)NGY(0.4744)ES(0.4744)DEQEK;
DEETEDVLASNGYESDEQEK	DEET[79.9663]EDVLASNGYESDEQEK	K	S	532	551	20	3	4T(79.9663)	sp|Q96JG6|VPS50_HUMAN	Q96JG6	VPS50_HUMAN	VPS50	Syndetin			1	522393	MS/MS	STY:79.9663@DEET(0.2500)EDVLAS(0.2500)NGY(0.2500)ES(0.2500)DEQEK;
DEGIGSPDIWEDEK	DEGIGS[79.9663]PDIWEDEK	K	A	134	147	14	2	6S(79.9663)	sp|Q01664|TFAP4_HUMAN	Q01664	TFAP4_HUMAN	TFAP4	Transcription factor AP-4			1	0	MS/MS	STY:79.9663@DEGIGS(1.0000)PDIWEDEK;
DEILPTTPISEQK	DEILPTTPIS[79.9663]EQK	K	G	215	227	13	2	10S(79.9663)	sp|P23396|RS3_HUMAN	P23396	RS3_HUMAN	RPS3	Small ribosomal subunit protein uS3			1	2.1937186E7	MS/MS	STY:79.9663@DEILPT(0.0329)T(0.0337)PIS(0.9334)EQK;
DEILPTTPISEQK	DEILPTT[79.9663]PISEQK	K	G	215	227	13	2	7T(79.9663)	sp|P23396|RS3_HUMAN	P23396	RS3_HUMAN	RPS3	Small ribosomal subunit protein uS3			3	2.1937186E7	MS/MS	STY:79.9663@DEILPT(0.0367)T(0.9153)PIS(0.0480)EQK;
DEILPTTPISEQK	DEILPT[79.9663]TPISEQK	K	G	215	227	13	2	6T(79.9663)	sp|P23396|RS3_HUMAN	P23396	RS3_HUMAN	RPS3	Small ribosomal subunit protein uS3			4	2.1937186E7	MS/MS	STY:79.9663@DEILPT(0.9289)T(0.0316)PIS(0.0395)EQK;
DELHIVEAEAMNYEGSPIK	DELHIVEAEAMNYEGS[79.9663]PIK	K	V	55	73	19	2,3	16S(79.9663)	sp|P06748|NPM_HUMAN	P06748	NPM_HUMAN	NPM1	Nucleophosmin			4	1.1165696E7	MS/MS	STY:79.9663@DELHIVEAEAMNY(0.0552)EGS(0.9448)PIK;
DELHIVEAEAMNYEGSPIK	DELHIVEAEAMNY[79.9663]EGSPIK	K	V	55	73	19	2,3	13Y(79.9663)	sp|P06748|NPM_HUMAN	P06748	NPM_HUMAN	NPM1	Nucleophosmin			6	1.1165696E7	MS/MS	STY:79.9663@DELHIVEAEAMNY(0.9421)EGS(0.0579)PIK;
DELHIVEAEAMNYEGSPIK	DELHIVEAEAM[15.9949]NYEGS[79.9663]PIK	K	V	55	73	19	3	11M(15.9949),16S(79.9663)	sp|P06748|NPM_HUMAN	P06748	NPM_HUMAN	NPM1	Nucleophosmin			1	1.53517e+06	MS/MS	STY:79.9663@DELHIVEAEAMNY(0.1014)EGS(0.8986)PIK;M:15.9949@DELHIVEAEAM(1.0000)NYEGSPIK;
DELHIVEAEAMNYEGSPIK	DELHIVEAEAM[15.9949]NY[79.9663]EGSPIK	K	V	55	73	19	3	11M(15.9949),13Y(79.9663)	sp|P06748|NPM_HUMAN	P06748	NPM_HUMAN	NPM1	Nucleophosmin			2	1.99605e+06	MS/MS	STY:79.9663@DELHIVEAEAMNY(0.5000)EGS(0.5000)PIK;M:15.9949@DELHIVEAEAM(1.0000)NYEGSPIK;
DELTESPK	DELT[79.9663]ESPK	K	Y	229	236	8	2	4T(79.9663)	sp|Q8NC51|SERB1_HUMAN	Q8NC51	SERB1_HUMAN	SERBP1	SERPINE1 mRNA-binding protein 1			3	1309353	MS/MS	STY:79.9663@DELT(0.5000)ES(0.5000)PK;
DENVEFDSDEEEPPDLPLD	DENVEFDS[79.9663]DEEEPPDLPLD	K	-	212	230	19	2	8S(79.9663)	sp|Q9BWG6|SCNM1_HUMAN	Q9BWG6	SCNM1_HUMAN	SCNM1	Sodium channel modifier 1			1	0	MS/MS	STY:79.9663@DENVEFDS(1.0000)DEEEPPDLPLD;
DEPAESPSETPGPR	DEPAES[79.9663]PSETPGPR	R	P	592	605	14	2	6S(79.9663)	sp|Q9NZT2|OGFR_HUMAN	Q9NZT2	OGFR_HUMAN	OGFR	Opioid growth factor receptor			1	782700	MS/MS	STY:79.9663@DEPAES(0.9405)PS(0.0297)ET(0.0297)PGPR;
DESCYDNAEAAFSDDEEDLNSK	DESC[57.0215]YDNAEAAFSDDEEDLNS[79.9663]K	K	G	525	546	22	3	21S(79.9663),4C(57.0215)	sp|Q68E01|INT3_HUMAN	Q68E01	INT3_HUMAN	INTS3	Integrator complex subunit 3			1	1.01394e+06	MS/MS	STY:79.9663@DES(0.0306)CY(0.0306)DNAEAAFS(0.0306)DDEEDLNS(0.9082)K;
DESCYDNAEAAFSDDEEDLNSK	DESC[57.0215]YDNAEAAFS[79.9663]DDEEDLNSK	K	G	525	546	22	3	13S(79.9663),4C(57.0215)	sp|Q68E01|INT3_HUMAN	Q68E01	INT3_HUMAN	INTS3	Integrator complex subunit 3			2	1.01394e+06	MS/MS	STY:79.9663@DES(0.1467)CY(0.0543)DNAEAAFS(0.7799)DDEEDLNS(0.0191)K;
DEVVSPLPSALQGPSGSLSAPPAASVISAPPSSSSR	DEVVSPLPSALQGPSGSLSAPPAASVIS[79.9663]APPSSSSR	R	H	326	361	36	3	28S(79.9663)	sp|Q7L2J0|MEPCE_HUMAN	Q7L2J0	MEPCE_HUMAN	MEPCE	7SK snRNA methylphosphate capping enzyme			1	3.94614e+06	MS/MS	STY:79.9663@DEVVS(0.0842)PLPS(0.0842)ALQGPS(0.0212)GS(0.0212)LS(0.0347)APPAAS(0.0051)VIS(0.1819)APPS(0.1819)S(0.1819)S(0.1819)S(0.0217)R;
DEVVSPLPSALQGPSGSLSAPPAASVISAPPSSSSR	DEVVS[79.9663]PLPSALQGPSGSLSAPPAASVISAPPSSSSR	R	H	326	361	36	3	5S(79.9663)	sp|Q7L2J0|MEPCE_HUMAN	Q7L2J0	MEPCE_HUMAN	MEPCE	7SK snRNA methylphosphate capping enzyme			1	3.94614e+06	MS/MS	STY:79.9663@DEVVS(0.2452)PLPS(0.2452)ALQGPS(0.2452)GS(0.2452)LS(0.0030)APPAAS(0.0029)VIS(0.0027)APPS(0.0027)S(0.0027)S(0.0027)S(0.0027)R;
DFQDYMEPEEGCQGSPQR	DFQDYMEPEEGC[57.0215]QGS[79.9663]PQR	K	R	180	197	18	2,3	12C(57.0215),15S(79.9663)	sp|O43237|DC1L2_HUMAN	O43237	DC1L2_HUMAN	DYNC1LI2	Cytoplasmic dynein 1 light intermediate chain 2			3	1.40138e+06	MS/MS	STY:79.9663@DFQDY(0.0846)MEPEEGCQGS(0.9154)PQR;
DFQDYMEPEEGCQGSPQR	DFQDY[79.9663]MEPEEGC[57.0215]QGSPQR	K	R	180	197	18	2	12C(57.0215),5Y(79.9663)	sp|O43237|DC1L2_HUMAN	O43237	DC1L2_HUMAN	DYNC1LI2	Cytoplasmic dynein 1 light intermediate chain 2			1	845287	MS/MS	STY:79.9663@DFQDY(0.8821)MEPEEGCQGS(0.1179)PQR;
DFQEYVEPGEDFPASPQR	DFQEY[79.9663]VEPGEDFPASPQR	R	R	193	210	18	2	5Y(79.9663)	sp|Q9Y6G9|DC1L1_HUMAN	Q9Y6G9	DC1L1_HUMAN	DYNC1LI1	Cytoplasmic dynein 1 light intermediate chain 1			1	0	MS/MS	STY:79.9663@DFQEY(0.9018)VEPGEDFPAS(0.0982)PQR;
DGAVNGPSVVGDQTPIEPQTSIER	DGAVNGPSVVGDQTPIEPQT[79.9663]SIER	K	L	377	400	24	3	20T(79.9663)	sp|P49321|NASP_HUMAN	P49321	NASP_HUMAN	NASP	Nuclear autoantigenic sperm protein			2	805463	MS/MS	STY:79.9663@DGAVNGPS(0.0293)VVGDQT(0.0419)PIEPQT(0.4644)S(0.4644)IER;
DGAVNGPSVVGDQTPIEPQTSIER	DGAVNGPS[79.9663]VVGDQTPIEPQTSIER	K	L	377	400	24	3	8S(79.9663)	sp|P49321|NASP_HUMAN	P49321	NASP_HUMAN	NASP	Nuclear autoantigenic sperm protein			2	0	MS/MS	STY:79.9663@DGAVNGPS(0.4863)VVGDQT(0.4863)PIEPQT(0.0137)S(0.0137)IER;
DGDSYDPYDFSDTEEEMPQVHTPK	DGDSYDPYDFSDTEEEMPQVHT[79.9663]PK	K	T	701	724	24	3	22T(79.9663)	sp|P25205|MCM3_HUMAN	P25205	MCM3_HUMAN	MCM3	DNA replication licensing factor MCM3			1	2156834	MS/MS	STY:79.9663@DGDS(0.0250)Y(0.0254)DPY(0.1380)DFS(0.1380)DT(0.1542)EEEMPQVHT(0.5194)PK;
DGDSYDPYDFSDTEEEMPQVHTPK	DGDSYDPY[79.9663]DFSDTEEEMPQVHTPK	K	T	701	724	24	3	8Y(79.9663)	sp|P25205|MCM3_HUMAN	P25205	MCM3_HUMAN	MCM3	DNA replication licensing factor MCM3			1	3330728	MS/MS	STY:79.9663@DGDS(0.0101)Y(0.0101)DPY(0.8393)DFS(0.0136)DT(0.0133)EEEMPQVHT(0.1137)PK;
DGDSYDPYDFSDTEEEMPQVHTPK	DGDSYDPY[79.9663]DFSDTEEEMPQVHT[79.9663]PK	K	T	701	724	24	3	22T(79.9663),8Y(79.9663)	sp|P25205|MCM3_HUMAN	P25205	MCM3_HUMAN	MCM3	DNA replication licensing factor MCM3			1	5.57965e+06	MS/MS	STY:79.9663@DGDS(0.0269)Y(0.0269)DPY(0.9050)DFS(0.0788)DT(0.0788)EEEMPQVHT(0.8836)PK;
DGDSYDPYDFSDTEEEMPQVHTPK	DGDS[79.9663]YDPYDFSDTEEEMPQVHTPK	K	T	701	724	24	3	4S(79.9663)	sp|P25205|MCM3_HUMAN	P25205	MCM3_HUMAN	MCM3	DNA replication licensing factor MCM3			1	1405185	MS/MS	STY:79.9663@DGDS(0.2549)Y(0.2549)DPY(0.2549)DFS(0.0062)DT(0.0646)EEEMPQVHT(0.1646)PK;
DGDSYDPYDFSDTEEEMPQVHTPK	DGDS[79.9663]Y[79.9663]DPYDFSDTEEEM[15.9949]PQVHTPK	K	T	701	724	24	3	17M(15.9949),4S(79.9663),5Y(79.9663)	sp|P25205|MCM3_HUMAN	P25205	MCM3_HUMAN	MCM3	DNA replication licensing factor MCM3			1	2.47769e+06	MS/MS	STY:79.9663@DGDS(0.6371)Y(0.6371)DPY(0.1814)DFS(0.1814)DT(0.1814)EEEMPQVHT(0.1814)PK;M:15.9949@DGDSYDPYDFSDTEEEM(1.0000)PQVHTPK;
DGLNQTTIPVSPPSTTK	DGLNQT[79.9663]TIPVSPPSTTK	K	P	573	589	17	2	6T(79.9663)	sp|Q71RC2|LARP4_HUMAN	Q71RC2	LARP4_HUMAN	LARP4	La-related protein 4			1	0	MS/MS	STY:79.9663@DGLNQT(0.3617)T(0.3617)IPVS(0.0691)PPS(0.0691)T(0.0691)T(0.0691)K;
DGLNQTTIPVSPPSTTKPSR	DGLNQT[79.9663]TIPVSPPSTTKPSR	K	A	573	592	20	3	6T(79.9663)	sp|Q71RC2|LARP4_HUMAN	Q71RC2	LARP4_HUMAN	LARP4	La-related protein 4			1	416958	MS/MS	STY:79.9663@DGLNQT(0.1510)T(0.1510)IPVS(0.1510)PPS(0.1510)T(0.1510)T(0.1510)KPS(0.0942)R;
DGPISPK	DGPIS[79.9663]PK	K	K	907	913	7	2	5S(79.9663)	sp|Q8WWQ0|PHIP_HUMAN	Q8WWQ0	PHIP_HUMAN	PHIP	PH-interacting protein			1	0	MS/MS	STY:79.9663@DGPIS(1.0000)PK;
DGQDAIAQSPEK	DGQDAIAQS[79.9663]PEK	K	E	281	292	12	2	9S(79.9663)	sp|Q9NWH9|SLTM_HUMAN	Q9NWH9	SLTM_HUMAN	SLTM	SAFB-like transcription modulator			13	1.0421065E7	MS/MS	STY:79.9663@DGQDAIAQS(1.0000)PEK;
DGQVINETSQHHDDLE	DGQVINET[79.9663]SQHHDDLE	R	-	451	466	16	2,3	8T(79.9663)	sp|P08670|VIME_HUMAN	P08670	VIME_HUMAN	VIM	Vimentin			4	1.22779e+06	MS/MS	STY:79.9663@DGQVINET(0.5000)S(0.5000)QHHDDLE;
DGSSPPLLEK	DGSS[79.9663]PPLLEK	K	Q	420	429	10	2	4S(79.9663)	sp|Q6W2J9|BCOR_HUMAN	Q6W2J9	BCOR_HUMAN	BCOR	BCL-6 corepressor			1	670447	MS/MS	STY:79.9663@DGS(0.0797)S(0.9203)PPLLEK;
DGSFGEGLTMK	DGS[79.9663]FGEGLTMK	K	K	645	655	11	2	3S(79.9663)	sp|Q9ULT0|TTC7A_HUMAN	Q9ULT0	TTC7A_HUMAN	TTC7A	Tetratricopeptide repeat protein 7A			1	374130	MS/MS	STY:79.9663@DGS(0.8754)FGEGLT(0.1246)MK;
DGTAPPPQSPGSPGTGQDEEWSDEESPR	DGTAPPPQSPGSPGTGQDEEWSDEES[79.9663]PR	R	K	333	360	28	3	26S(79.9663)	sp|Q9UKS6|PACN3_HUMAN	Q9UKS6	PACN3_HUMAN	PACSIN3	Protein kinase C and casein kinase substrate in neurons protein 3			2	4468079	MS/MS	STY:79.9663@DGT(0.0147)APPPQS(0.0147)PGS(0.0192)PGT(0.0227)GQDEEWS(0.0227)DEES(0.9059)PR;
DGTAPPPQSPGSPGTGQDEEWSDEESPR	DGTAPPPQSPGSPGTGQDEEWS[79.9663]DEESPR	R	K	333	360	28	3	22S(79.9663)	sp|Q9UKS6|PACN3_HUMAN	Q9UKS6	PACN3_HUMAN	PACSIN3	Protein kinase C and casein kinase substrate in neurons protein 3			1	4468079	MS/MS	STY:79.9663@DGT(0.0179)APPPQS(0.0187)PGS(0.0313)PGT(0.0110)GQDEEWS(0.8957)DEES(0.0253)PR;
DGTAPPPQSPGSPGTGQDEEWSDEESPRK	DGTAPPPQSPGSPGTGQDEEWS[79.9663]DEESPRK	R	A	333	361	29	3	22S(79.9663)	sp|Q9UKS6|PACN3_HUMAN	Q9UKS6	PACN3_HUMAN	PACSIN3	Protein kinase C and casein kinase substrate in neurons protein 3			1	0	MS/MS	STY:79.9663@DGT(0.0121)APPPQS(0.0227)PGS(0.0227)PGT(0.0227)GQDEEWS(0.4599)DEES(0.4599)PRK;
DGTAPPPQSPGSPGTGQDEEWSDEESPRK	DGTAPPPQS[79.9663]PGSPGTGQDEEWSDEESPRK	R	A	333	361	29	3	9S(79.9663)	sp|Q9UKS6|PACN3_HUMAN	Q9UKS6	PACN3_HUMAN	PACSIN3	Protein kinase C and casein kinase substrate in neurons protein 3			1	1.69811e+06	MS/MS	STY:79.9663@DGT(0.0073)APPPQS(0.3111)PGS(0.3111)PGT(0.3111)GQDEEWS(0.0426)DEES(0.0167)PRK;
DGTAPPPQSPGSPGTGQDEEWSDEESPR	DGT[79.9663]APPPQSPGSPGTGQDEEWSDEESPR	R	K	333	360	28	3	3T(79.9663)	sp|Q9UKS6|PACN3_HUMAN	Q9UKS6	PACN3_HUMAN	PACSIN3	Protein kinase C and casein kinase substrate in neurons protein 3			1	4468079	MS/MS	STY:79.9663@DGT(0.8917)APPPQS(0.0142)PGS(0.0168)PGT(0.0168)GQDEEWS(0.0302)DEES(0.0302)PR;
DGTAPPPQSPGSPGTGQDEEWSDEESPRK	DGT[79.9663]APPPQSPGSPGTGQDEEWSDEESPRK	R	A	333	361	29	3	3T(79.9663)	sp|Q9UKS6|PACN3_HUMAN	Q9UKS6	PACN3_HUMAN	PACSIN3	Protein kinase C and casein kinase substrate in neurons protein 3			1	1.69811e+06	MS/MS	STY:79.9663@DGT(0.1667)APPPQS(0.1667)PGS(0.1667)PGT(0.1667)GQDEEWS(0.1667)DEES(0.1667)PRK;
DGVADVSIEDSVISLSGDHCIIGR	DGVADVS[79.9663]IEDSVISLSGDHC[57.0215]IIGR	K	T	93	116	24	3	20C(57.0215),7S(79.9663)	sp|P00441|SODC_HUMAN	P00441	SODC_HUMAN	SOD1	Superoxide dismutase [Cu-Zn]			1	0	MS/MS	STY:79.9663@DGVADVS(0.2614)IEDS(0.2462)VIS(0.2462)LS(0.2462)GDHCIIGR;
DGVLTLANNVTPAK	DGVLTLANNVT[79.9663]PAK	K	D	561	574	14	2	11T(79.9663)	sp|P27816|MAP4_HUMAN	P27816	MAP4_HUMAN	MAP4	Microtubule-associated protein 4			2	1.14465e+06	MS/MS	STY:79.9663@DGVLT(0.0587)LANNVT(0.9413)PAK;
DGVLTLANNVTPAK	DGVLT[79.9663]LANNVTPAK	K	D	561	574	14	2	5T(79.9663)	sp|P27816|MAP4_HUMAN	P27816	MAP4_HUMAN	MAP4	Microtubule-associated protein 4			1	1.14465e+06	MS/MS	STY:79.9663@DGVLT(0.9408)LANNVT(0.0592)PAK;
DHFGLEGDEESTMLEDSVSPK	DHFGLEGDEESTMLEDSVS[79.9663]PK	K	K	407	427	21	3	19S(79.9663)	sp|Q9Y490|TLN1_HUMAN	Q9Y490	TLN1_HUMAN	TLN1	Talin-1			1	375069	MS/MS	STY:79.9663@DHFGLEGDEES(0.0773)T(0.0773)MLEDS(0.0773)VS(0.7680)PK;
DHFYSDDDAIEADSEGDAEPCDK	DHFY[79.9663]SDDDAIEADS[79.9663]EGDAEPC[57.0215]DK	K	E	54	76	23	3	14S(79.9663),21C(57.0215),4Y(79.9663)	sp|Q9Y3B9|RRP15_HUMAN	Q9Y3B9	RRP15_HUMAN	RRP15	RRP15-like protein			4	3853081	MS/MS	STY:79.9663@DHFY(0.6575)S(0.6575)DDDAIEADS(0.6850)EGDAEPCDK;
DHFYSDDDAIEADSEGDAEPCDK	DHFY[79.9663]S[79.9663]DDDAIEADSEGDAEPC[57.0215]DK	K	E	54	76	23	3	21C(57.0215),4Y(79.9663),5S(79.9663)	sp|Q9Y3B9|RRP15_HUMAN	Q9Y3B9	RRP15_HUMAN	RRP15	RRP15-like protein			3	3853081	MS/MS	STY:79.9663@DHFY(0.7023)S(0.7023)DDDAIEADS(0.5953)EGDAEPCDK;
DHSPTPSVFNSDEER	DHSPTPSVFNS[79.9663]DEER	R	Y	490	504	15	3	11S(79.9663)	sp|Q6UN15|FIP1_HUMAN	Q6UN15	FIP1_HUMAN	FIP1L1	Pre-mRNA 3'-end-processing factor FIP1			1	287247	MS/MS	STY:79.9663@DHS(0.1186)PT(0.1186)PS(0.1186)VFNS(0.6442)DEER;
DHSPTPSVFNSDEER	DHSPTPS[79.9663]VFNSDEER	R	Y	490	504	15	3	7S(79.9663)	sp|Q6UN15|FIP1_HUMAN	Q6UN15	FIP1_HUMAN	FIP1L1	Pre-mRNA 3'-end-processing factor FIP1			1	287247	MS/MS	STY:79.9663@DHS(0.0496)PT(0.0496)PS(0.4504)VFNS(0.4504)DEER;
DHSPTPSVFNSDEER	DHSPT[79.9663]PSVFNSDEER	R	Y	490	504	15	2	5T(79.9663)	sp|Q6UN15|FIP1_HUMAN	Q6UN15	FIP1_HUMAN	FIP1L1	Pre-mRNA 3'-end-processing factor FIP1			1	944493	MS/MS	STY:79.9663@DHS(0.0137)PT(0.3288)PS(0.3288)VFNS(0.3288)DEER;
DHSPTPSVFNSDEER	DHS[79.9663]PTPSVFNSDEER	R	Y	490	504	15	2,3	3S(79.9663)	sp|Q6UN15|FIP1_HUMAN	Q6UN15	FIP1_HUMAN	FIP1L1	Pre-mRNA 3'-end-processing factor FIP1			8	1.27945e+06	MS/MS	STY:79.9663@DHS(0.9361)PT(0.0213)PS(0.0213)VFNS(0.0213)DEER;
DHSPTPSVFNSDEER	DHS[79.9663]PT[79.9663]PSVFNSDEER	R	Y	490	504	15	3	3S(79.9663),5T(79.9663)	sp|Q6UN15|FIP1_HUMAN	Q6UN15	FIP1_HUMAN	FIP1L1	Pre-mRNA 3'-end-processing factor FIP1			1	284036	MS/MS	STY:79.9663@DHS(0.5801)PT(0.5801)PS(0.5801)VFNS(0.2598)DEER;
DIDHETVVEEQIIGENSPPDYSEYMTGK	DIDHETVVEEQIIGENS[79.9663]PPDYSEYMTGK	K	K	231	258	28	3	17S(79.9663)	sp|P25490|TYY1_HUMAN	P25490	TYY1_HUMAN	YY1	Transcriptional repressor protein YY1			1	0	MS/MS	STY:79.9663@DIDHET(0.2193)VVEEQIIGENS(0.7353)PPDY(0.0172)S(0.0095)EY(0.0093)MT(0.0093)GK;
DIDISSPEFK	DIDIS[79.9663]SPEFK	K	I	172	181	10	2	5S(79.9663)	sp|Q09666|AHNK_HUMAN	Q09666	AHNK_HUMAN	AHNAK	Neuroblast differentiation-associated protein AHNAK			5	8009423	MS/MS	STY:79.9663@DIDIS(0.5000)S(0.5000)PEFK;
DIEISTEEEK	DIEIS[79.9663]TEEEK	R	D	333	342	10	2	5S(79.9663)	sp|Q4G0J3|LARP7_HUMAN	Q4G0J3	LARP7_HUMAN	LARP7	La-related protein 7			1	1.18976e+06	MS/MS	STY:79.9663@DIEIS(0.5000)T(0.5000)EEEK;
DIEISTEEEK	DIEIS[79.9663]T[79.9663]EEEK	R	D	333	342	10	2	5S(79.9663),6T(79.9663)	sp|Q4G0J3|LARP7_HUMAN	Q4G0J3	LARP7_HUMAN	LARP7	La-related protein 7			1	1.20272e+06	MS/MS	STY:79.9663@DIEIS(1.0000)T(1.0000)EEEK;
DIKEESDEEEEDDEESGR	DIKEES[79.9663]DEEEEDDEESGR	K	L	200	217	18	2,3	6S(79.9663)	sp|Q96EV2|RBM33_HUMAN	Q96EV2	RBM33_HUMAN	RBM33	RNA-binding protein 33			7	2.84812e+06	MS/MS	STY:79.9663@DIKEES(0.9417)DEEEEDDEES(0.0583)GR;
DISGPSPSK	DISGPS[79.9663]PSK	K	K	82	90	9	2	6S(79.9663)	sp|Q96GX9|MTNB_HUMAN	Q96GX9	MTNB_HUMAN	APIP	Methylthioribulose-1-phosphate dehydratase			1	1.65704e+06	MS/MS	STY:79.9663@DIS(0.0194)GPS(0.4903)PS(0.4903)K;
DKDDQEWESPSPPKPTVFISGVIAR	DKDDQEWESPSPPKPTVFIS[79.9663]GVIAR	K	G	41	65	25	3	20S(79.9663)	sp|P51397|DAP1_HUMAN	P51397	DAP1_HUMAN	DAP	Death-associated protein 1			1	2.8513e+06	MS/MS	STY:79.9663@DKDDQEWES(0.0478)PS(0.0703)PPKPT(0.0703)VFIS(0.8115)GVIAR;
DKDDQEWESPSPPKPTVFISGVIAR	DKDDQEWESPS[79.9663]PPKPTVFISGVIAR	K	G	41	65	25	3	11S(79.9663)	sp|P51397|DAP1_HUMAN	P51397	DAP1_HUMAN	DAP	Death-associated protein 1			1	2.8513e+06	MS/MS	STY:79.9663@DKDDQEWES(0.0187)PS(0.8524)PPKPT(0.0795)VFIS(0.0494)GVIAR;
DKDDQEWESPSPPKPTVFISGVIAR	DKDDQEWES[79.9663]PSPPKPTVFISGVIAR	K	G	41	65	25	3	9S(79.9663)	sp|P51397|DAP1_HUMAN	P51397	DAP1_HUMAN	DAP	Death-associated protein 1			2	1.08139e+06	MS/MS	STY:79.9663@DKDDQEWES(0.4681)PS(0.4681)PPKPT(0.0356)VFIS(0.0282)GVIAR;
DKEVSDDEAEEK	DKEVS[79.9663]DDEAEEK	R	E	227	238	12	2,3	5S(79.9663)	sp|P07900|HS90A_HUMAN	P07900	HS90A_HUMAN	HSP90AA1	Heat shock protein HSP 90-alpha			33	1.438217E7	MS/MS	STY:79.9663@DKEVS(1.0000)DDEAEEK;
DKSPVREPIDNLTPEER	DKSPVREPIDNLT[79.9663]PEER	K	D	134	150	17	3	13T(79.9663)	sp|Q14498|RBM39_HUMAN	Q14498	RBM39_HUMAN	RBM39	RNA-binding protein 39			7	2976448	MS/MS	STY:79.9663@DKS(0.0593)PVREPIDNLT(0.9407)PEER;
DKSPVREPIDNLTPEER	DKS[79.9663]PVREPIDNLTPEER	K	D	134	150	17	3	3S(79.9663)	sp|Q14498|RBM39_HUMAN	Q14498	RBM39_HUMAN	RBM39	RNA-binding protein 39			17	3.1084e+06	MS/MS	STY:79.9663@DKS(0.9464)PVREPIDNLT(0.0536)PEER;
DLAVPAALTPR	DLAVPAALT[79.9663]PR	R	A	1836	1846	11	2	9T(79.9663)	sp|Q8TEM1|PO210_HUMAN	Q8TEM1	PO210_HUMAN	NUP210	Nuclear pore membrane glycoprotein 210			1	0	MS/MS	STY:79.9663@DLAVPAALT(1.0000)PR;
DLDEEGSEK	DLDEEGS[79.9663]EK	K	E	573	581	9	2	7S(79.9663)	sp|O43719|HTSF1_HUMAN	O43719	HTSF1_HUMAN	HTATSF1	17S U2 SnRNP complex component HTATSF1			8	5727947	MS/MS	STY:79.9663@DLDEEGS(1.0000)EK;
DLFDYSPPLHK	DLFDYS[79.9663]PPLHK	K	N	507	517	11	2	6S(79.9663)	sp|Q9NYF8|BCLF1_HUMAN	Q9NYF8	BCLF1_HUMAN	BCLAF1	Bcl-2-associated transcription factor 1			1	5.25777e+06	MS/MS	STY:79.9663@DLFDY(0.0553)S(0.9447)PPLHK;
DLFDYSPPLHK	DLFDY[79.9663]SPPLHK	K	N	507	517	11	2,3	5Y(79.9663)	sp|Q9NYF8|BCLF1_HUMAN	Q9NYF8	BCLF1_HUMAN	BCLAF1	Bcl-2-associated transcription factor 1			8	6.03649e+06	MS/MS	STY:79.9663@DLFDY(0.8829)S(0.1171)PPLHK;
DLGHPVEEEDELESGDQEDEDDESEDPGK	DLGHPVEEEDELESGDQEDEDDES[79.9663]EDPGK	K	D	929	957	29	3	24S(79.9663)	sp|O60763|USO1_HUMAN	O60763	USO1_HUMAN	USO1	General vesicular transport factor p115			4	2.96267e+06	MS/MS	STY:79.9663@DLGHPVEEEDELES(0.0722)GDQEDEDDES(0.9278)EDPGK;
DLGHPVEEEDELESGDQEDEDDESEDPGK	DLGHPVEEEDELES[79.9663]GDQEDEDDESEDPGK	K	D	929	957	29	3	14S(79.9663)	sp|O60763|USO1_HUMAN	O60763	USO1_HUMAN	USO1	General vesicular transport factor p115			2	2.96267e+06	MS/MS	STY:79.9663@DLGHPVEEEDELES(0.9185)GDQEDEDDES(0.0815)EDPGK;
DLGSTEDGDGTDDFLTDK	DLGSTEDGDGTDDFLT[79.9663]DK	K	E	180	197	18	2	16T(79.9663)	sp|Q15527|SURF2_HUMAN	Q15527	SURF2_HUMAN	SURF2	Surfeit locus protein 2			1	0	MS/MS	STY:79.9663@DLGS(0.0308)T(0.0308)EDGDGT(0.0377)DDFLT(0.9007)DK;
DLGSTEDGDGTDDFLTDKEDEK	DLGSTEDGDGTDDFLT[79.9663]DKEDEK	K	A	180	201	22	3	16T(79.9663)	sp|Q15527|SURF2_HUMAN	Q15527	SURF2_HUMAN	SURF2	Surfeit locus protein 2			3	5.45782e+06	MS/MS	STY:79.9663@DLGS(0.0192)T(0.0200)EDGDGT(0.0207)DDFLT(0.9401)DKEDEK;
DLGSTEDGDGTDDFLTDKEDEK	DLGSTEDGDGT[79.9663]DDFLTDKEDEK	K	A	180	201	22	3	11T(79.9663)	sp|Q15527|SURF2_HUMAN	Q15527	SURF2_HUMAN	SURF2	Surfeit locus protein 2			2	5308424	MS/MS	STY:79.9663@DLGS(0.3434)T(0.0119)EDGDGT(0.5073)DDFLT(0.1373)DKEDEK;
DLGSTEDGDGTDDFLTDKEDEK	DLGSTEDGDGT[79.9663]DDFLT[79.9663]DKEDEK	K	A	180	201	22	3	11T(79.9663),16T(79.9663)	sp|Q15527|SURF2_HUMAN	Q15527	SURF2_HUMAN	SURF2	Surfeit locus protein 2			2	1.6231e+06	MS/MS	STY:79.9663@DLGS(0.0644)T(0.0662)EDGDGT(0.9347)DDFLT(0.9348)DKEDEK;
DLGSTEDGDGTDDFLTDK	DLGS[79.9663]TEDGDGTDDFLTDK	K	E	180	197	18	2	4S(79.9663)	sp|Q15527|SURF2_HUMAN	Q15527	SURF2_HUMAN	SURF2	Surfeit locus protein 2			1	0	MS/MS	STY:79.9663@DLGS(0.4708)T(0.4708)EDGDGT(0.0292)DDFLT(0.0292)DK;
DLGSTEDGDGTDDFLTDKEDEK	DLGS[79.9663]TEDGDGTDDFLTDKEDEK	K	A	180	201	22	3	4S(79.9663)	sp|Q15527|SURF2_HUMAN	Q15527	SURF2_HUMAN	SURF2	Surfeit locus protein 2			1	251765	MS/MS	STY:79.9663@DLGS(0.3293)T(0.3293)EDGDGT(0.3293)DDFLT(0.0121)DKEDEK;
DLPTIPGVTSPSSDEPPMEASQSHLR	DLPTIPGVT[79.9663]SPSSDEPPMEASQSHLR	R	N	74	99	26	3	9T(79.9663)	sp|Q13541|4EBP1_HUMAN	Q13541	4EBP1_HUMAN	EIF4EBP1	Eukaryotic translation initiation factor 4E-binding protein 1			2	3.21868e+06	MS/MS	STY:79.9663@DLPT(0.2091)IPGVT(0.3744)S(0.3744)PS(0.0150)S(0.0150)DEPPMEAS(0.0061)QS(0.0061)HLR;
DLQEQDADAGSER	DLQEQDADAGS[79.9663]ER	R	G	117	129	13	2	11S(79.9663)	sp|Q6P158|DHX57_HUMAN	Q6P158	DHX57_HUMAN	DHX57	Putative ATP-dependent RNA helicase DHX57			1	0	MS/MS	STY:79.9663@DLQEQDADAGS(1.0000)ER;
DLSMSEEDQMMR	DLS[79.9663]MSEEDQMMR	R	A	1366	1377	12	2	3S(79.9663)	sp|Q7Z6Z7|HUWE1_HUMAN	Q7Z6Z7	HUWE1_HUMAN	HUWE1	E3 ubiquitin-protein ligase HUWE1			1	0	MS/MS	STY:79.9663@DLS(0.5000)MS(0.5000)EEDQMMR;
DLSPTLIDNSAAK	DLS[79.9663]PTLIDNSAAK	R	Q	486	498	13	2	3S(79.9663)	sp|Q9P2B4|CT2NL_HUMAN	Q9P2B4	CT2NL_HUMAN	CTTNBP2NL	CTTNBP2 N-terminal-like protein			3	1.76556e+06	MS/MS	STY:79.9663@DLS(0.9387)PT(0.0306)LIDNS(0.0306)AAK;
DLSTPGLEK	DLS[79.9663]TPGLEK	R	D	1850	1858	9	2	3S(79.9663)	sp|P46821|MAP1B_HUMAN	P46821	MAP1B_HUMAN	MAP1B	Microtubule-associated protein 1B			1	889243	MS/MS	STY:79.9663@DLS(0.5000)T(0.5000)PGLEK;
DLVLPTQALPASPALK	DLVLPT[79.9663]QALPASPALK	K	N	354	369	16	2	6T(79.9663)	sp|Q15554|TERF2_HUMAN	Q15554	TERF2_HUMAN	TERF2	Telomeric repeat-binding factor 2			1	0	MS/MS	STY:79.9663@DLVLPT(0.5000)QALPAS(0.5000)PALK;
DMDEPSPVPNVEEVTLPK	DMDEPS[79.9663]PVPNVEEVTLPK	K	T	342	359	18	2	6S(79.9663)	sp|Q8TAQ2|SMRC2_HUMAN	Q8TAQ2	SMRC2_HUMAN	SMARCC2	SWI/SNF complex subunit SMARCC2			1	0	MS/MS	STY:79.9663@DMDEPS(0.9284)PVPNVEEVT(0.0716)LPK;
DMSPLSETEMALGK	DMSPLSET[79.9663]EMALGK	K	D	505	518	14	2	8T(79.9663)	sp|P27816|MAP4_HUMAN	P27816	MAP4_HUMAN	MAP4	Microtubule-associated protein 4			1	0	MS/MS	STY:79.9663@DMS(0.0293)PLS(0.0297)ET(0.9410)EMALGK;
DMSPLSETEMALGK	DMS[79.9663]PLSETEMALGK	K	D	505	518	14	2	3S(79.9663)	sp|P27816|MAP4_HUMAN	P27816	MAP4_HUMAN	MAP4	Microtubule-associated protein 4			1	0	MS/MS	STY:79.9663@DMS(0.4487)PLS(0.2757)ET(0.2757)EMALGK;
DNPSPEPQLDDIK	DNPS[79.9663]PEPQLDDIK	K	R	162	174	13	2	4S(79.9663)	sp|Q96JC9|EAF1_HUMAN	Q96JC9	EAF1_HUMAN	EAF1	ELL-associated factor 1			1	1.68433e+06	MS/MS	STY:79.9663@DNPS(1.0000)PEPQLDDIK;
DNQESSDAELSSSEYIK	DNQES[79.9663]SDAELSSSEYIK	K	T	622	638	17	2	5S(79.9663)	sp|Q96JM3|CHAP1_HUMAN	Q96JM3	CHAP1_HUMAN	CHAMP1	Chromosome alignment-maintaining phosphoprotein 1			3	0	MS/MS	STY:79.9663@DNQES(0.4829)S(0.4829)DAELS(0.0084)S(0.0084)S(0.0088)EY(0.0088)IK;
DNSPEPNDPEEPQEVSSTPSDK	DNS[79.9663]PEPNDPEEPQEVSSTPSDK	R	K	254	275	22	3	3S(79.9663)	sp|Q9HB58|SP110_HUMAN	Q9HB58	SP110_HUMAN	SP110	Sp110 nuclear body protein			1	417335	MS/MS	STY:79.9663@DNS(0.7189)PEPNDPEEPQEVS(0.1091)S(0.1091)T(0.0450)PS(0.0180)DK;
DPAQPMSPGEATQSGAR	DPAQPMSPGEAT[79.9663]QSGAR	R	P	5	21	17	2	12T(79.9663)	sp|Q9BQG0|MBB1A_HUMAN	Q9BQG0	MBB1A_HUMAN	MYBBP1A	Myb-binding protein 1A			1	3563706	MS/MS	STY:79.9663@DPAQPMS(0.0712)PGEAT(0.6896)QS(0.2393)GAR;
DPAQPMSPGEATQSGAR	DPAQPMS[79.9663]PGEATQSGAR	R	P	5	21	17	2	7S(79.9663)	sp|Q9BQG0|MBB1A_HUMAN	Q9BQG0	MBB1A_HUMAN	MYBBP1A	Myb-binding protein 1A			11	6866126	MS/MS	STY:79.9663@DPAQPMS(0.9376)PGEAT(0.0312)QS(0.0312)GAR;
DPAQPMSPGEATQSGAR	DPAQPM[15.9949]SPGEAT[79.9663]QSGAR	R	P	5	21	17	2	12T(79.9663),6M(15.9949)	sp|Q9BQG0|MBB1A_HUMAN	Q9BQG0	MBB1A_HUMAN	MYBBP1A	Myb-binding protein 1A			1	0	MS/MS	STY:79.9663@DPAQPMS(0.0846)PGEAT(0.4577)QS(0.4577)GAR;M:15.9949@DPAQPM(1.0000)SPGEATQSGAR;
DPAQPMSPGEATQSGAR	DPAQPM[15.9949]S[79.9663]PGEATQSGAR	R	P	5	21	17	2	6M(15.9949),7S(79.9663)	sp|Q9BQG0|MBB1A_HUMAN	Q9BQG0	MBB1A_HUMAN	MYBBP1A	Myb-binding protein 1A			1	0	MS/MS	STY:79.9663@DPAQPMS(0.3333)PGEAT(0.3333)QS(0.3333)GAR;M:15.9949@DPAQPM(1.0000)SPGEATQSGAR;
DPDSNPYSLLDTSEPEPPVDSEPGEPPPASAR	DPDSNPYSLLDTSEPEPPVDS[79.9663]EPGEPPPASAR	K	R	513	544	32	3	21S(79.9663)	sp|P51116|FXR2_HUMAN	P51116	FXR2_HUMAN	FXR2	RNA-binding protein FXR2			1	0	MS/MS	STY:79.9663@DPDS(0.0461)NPY(0.0522)S(0.0682)LLDT(0.0682)S(0.1096)EPEPPVDS(0.3587)EPGEPPPAS(0.2971)AR;
DPNSATATAPPSPLK	DPNSAT[79.9663]ATAPPSPLK	K	R	150	164	15	2	6T(79.9663)	sp|Q92766|RREB1_HUMAN	Q92766	RREB1_HUMAN	RREB1	Ras-responsive element-binding protein 1			1	679693	MS/MS	STY:79.9663@DPNS(0.0102)AT(0.3299)AT(0.3299)APPS(0.3299)PLK;
DPNSATATAPPSPLK	DPNS[79.9663]ATATAPPSPLK	K	R	150	164	15	2	4S(79.9663)	sp|Q92766|RREB1_HUMAN	Q92766	RREB1_HUMAN	RREB1	Ras-responsive element-binding protein 1			1	679693	MS/MS	STY:79.9663@DPNS(0.4867)AT(0.4867)AT(0.0133)APPS(0.0133)PLK;
DPSASPGDAGEQAIR	DPSAS[79.9663]PGDAGEQAIR	R	Q	286	300	15	2	5S(79.9663)	sp|P18206|VINC_HUMAN	P18206	VINC_HUMAN	VCL	Vinculin			1	2340969	MS/MS	STY:79.9663@DPS(0.0578)AS(0.9422)PGDAGEQAIR;
DPSSGQEVATPPVPQLQVCEPK	DPSSGQEVAT[79.9663]PPVPQLQVC[57.0215]EPK	K	E	673	694	22	3	10T(79.9663),19C(57.0215)	sp|Q9UKV3|ACINU_HUMAN	Q9UKV3	ACINU_HUMAN	ACIN1	Apoptotic chromatin condensation inducer in the nucleus			1	876119	MS/MS	STY:79.9663@DPS(0.0880)S(0.0880)GQEVAT(0.8240)PPVPQLQVCEPK;
DPSASPGDAGEQAIR	DPS[79.9663]ASPGDAGEQAIR	R	Q	286	300	15	2	3S(79.9663)	sp|P18206|VINC_HUMAN	P18206	VINC_HUMAN	VCL	Vinculin			3	2340969	MS/MS	STY:79.9663@DPS(0.5000)AS(0.5000)PGDAGEQAIR;
DPSPEADAPVLGSPEK	DPS[79.9663]PEADAPVLGSPEK	R	E	361	376	16	2	3S(79.9663)	sp|O15234|CASC3_HUMAN	O15234	CASC3_HUMAN	CASC3	Protein CASC3			1	568768	MS/MS	STY:79.9663@DPS(0.9312)PEADAPVLGS(0.0688)PEK;
DPSSGQEVATPPVPQLQVCEPK	DPS[79.9663]SGQEVATPPVPQLQVC[57.0215]EPK	K	E	673	694	22	3	19C(57.0215),3S(79.9663)	sp|Q9UKV3|ACINU_HUMAN	Q9UKV3	ACINU_HUMAN	ACIN1	Apoptotic chromatin condensation inducer in the nucleus			2	876119	MS/MS	STY:79.9663@DPS(0.3333)S(0.3333)GQEVAT(0.3333)PPVPQLQVCEPK;
DPSSNDINGGMEPTPSTVSTPSPSADLLGLR	DPS[79.9663]SNDINGGMEPTPSTVSTPSPSADLLGLR	R	A	634	664	31	3	3S(79.9663)	sp|O95782|AP2A1_HUMAN	O95782	AP2A1_HUMAN	AP2A1	AP-2 complex subunit alpha-1			1	0	MS/MS	STY:79.9663@DPS(0.3623)S(0.3623)NDINGGMEPT(0.0434)PS(0.0434)T(0.0314)VS(0.0314)T(0.0764)PS(0.0426)PS(0.0067)ADLLGLR;
DPVSPASQK	DPVSPAS[79.9663]QK	K	M	1098	1106	9	2	7S(79.9663)	sp|Q12888|TP53B_HUMAN	Q12888	TP53B_HUMAN	TP53BP1	TP53-binding protein 1			1	1.20317e+06	MS/MS	STY:79.9663@DPVS(0.0965)PAS(0.9035)QK;
DPVSPASQK	DPVS[79.9663]PASQK	K	M	1098	1106	9	2	4S(79.9663)	sp|Q12888|TP53B_HUMAN	Q12888	TP53B_HUMAN	TP53BP1	TP53-binding protein 1			6	1.67104e+06	MS/MS	STY:79.9663@DPVS(0.9441)PAS(0.0559)QK;
DQDMSSPTTMK	DQDMS[79.9663]SPTTMK	R	K	307	317	11	2	5S(79.9663)	sp|O00712|NFIB_HUMAN	O00712	NFIB_HUMAN	NFIB	Nuclear factor 1 B-type			1	880703	MS/MS	STY:79.9663@DQDMS(0.2500)S(0.2500)PT(0.2500)T(0.2500)MK;
DQPDGSSLSPAQSPSQSQPPAASSLR	DQPDGS[79.9663]SLSPAQSPSQSQPPAASSLR	K	E	212	237	26	3	6S(79.9663)	sp|Q6WCQ1|MPRIP_HUMAN	Q6WCQ1	MPRIP_HUMAN	MPRIP	Myosin phosphatase Rho-interacting protein			1	0	MS/MS	STY:79.9663@DQPDGS(0.1250)S(0.1250)LS(0.1250)PAQS(0.1250)PS(0.1250)QS(0.1250)QPPAAS(0.1250)S(0.1250)LR;
DQQPSGSEGEDDDAEAALK	DQQPS[79.9663]GSEGEDDDAEAALK	K	K	82	100	19	2	5S(79.9663)	sp|Q9NXG2|THUM1_HUMAN	Q9NXG2	THUM1_HUMAN	THUMPD1	THUMP domain-containing protein 1			1	444793	MS/MS	STY:79.9663@DQQPS(0.5000)GS(0.5000)EGEDDDAEAALK;
DQQPSGSEGEDDDAEAALK	DQQPS[79.9663]GS[79.9663]EGEDDDAEAALK	K	K	82	100	19	2	5S(79.9663),7S(79.9663)	sp|Q9NXG2|THUM1_HUMAN	Q9NXG2	THUM1_HUMAN	THUMPD1	THUMP domain-containing protein 1			2	1.60882e+06	MS/MS	STY:79.9663@DQQPS(1.0000)GS(1.0000)EGEDDDAEAALK;
DRQSPPPAK	DRQS[79.9663]PPPAK	K	R	839	847	9	2	4S(79.9663)	sp|Q86VM9|ZCH18_HUMAN	Q86VM9	ZCH18_HUMAN	ZC3H18	Zinc finger CCCH domain-containing protein 18			1	756571	MS/MS	STY:79.9663@DRQS(1.0000)PPPAK;
DSAAPSPIPGADNLSADPVVSPPTSIPFK	DSAAPSPIPGADNLSADPVVSPPT[79.9663]SIPFK	R	S	306	334	29	3	24T(79.9663)	sp|Q5T1M5|FKB15_HUMAN	Q5T1M5	FKB15_HUMAN	FKBP15	FK506-binding protein 15			1	0	MS/MS	STY:79.9663@DS(0.1443)AAPS(0.2108)PIPGADNLS(0.1831)ADPVVS(0.0048)PPT(0.2285)S(0.2285)IPFK;
DSAIPVESDTDDEGAPR	DSAIPVESDT[79.9663]DDEGAPR	R	I	461	477	17	2	10T(79.9663)	sp|Q96D46|NMD3_HUMAN	Q96D46	NMD3_HUMAN	NMD3	60S ribosomal export protein NMD3			1	0	MS/MS	STY:79.9663@DS(0.0592)AIPVES(0.0977)DT(0.8431)DDEGAPR;
DSAIPVESDTDDEGAPR	DSAIPVES[79.9663]DTDDEGAPR	R	I	461	477	17	2	8S(79.9663)	sp|Q96D46|NMD3_HUMAN	Q96D46	NMD3_HUMAN	NMD3	60S ribosomal export protein NMD3			1	1.54781e+06	MS/MS	STY:79.9663@DS(0.0541)AIPVES(0.6148)DT(0.3311)DDEGAPR;
DSAIPVESDTDDEGAPR	DSAIPVES[79.9663]DT[79.9663]DDEGAPR	R	I	461	477	17	2	10T(79.9663),8S(79.9663)	sp|Q96D46|NMD3_HUMAN	Q96D46	NMD3_HUMAN	NMD3	60S ribosomal export protein NMD3			1	0	MS/MS	STY:79.9663@DS(0.3588)AIPVES(0.8203)DT(0.8209)DDEGAPR;
DSALAEAPEGLSPAPPAR	DSALAEAPEGLS[79.9663]PAPPAR	R	S	845	862	18	2	12S(79.9663)	sp|Q9H9J4|UBP42_HUMAN	Q9H9J4	UBP42_HUMAN	USP42	Ubiquitin carboxyl-terminal hydrolase 42			1	1.15553e+06	MS/MS	STY:79.9663@DS(0.0773)ALAEAPEGLS(0.9227)PAPPAR;
DSENLASPSEYPENGER	DSENLAS[79.9663]PSEYPENGER	R	F	617	633	17	2,3	7S(79.9663)	sp|P52948|NUP98_HUMAN	P52948	NUP98_HUMAN	NUP98	Nuclear pore complex protein Nup98-Nup96			2	6994006	MS/MS	STY:79.9663@DS(0.0347)ENLAS(0.9245)PS(0.0187)EY(0.0220)PENGER;
DSGSDEDFLMEDDDDSDYGSSK	DSGSDEDFLMEDDDDS[79.9663]DYGSSK	K	K	129	150	22	2	16S(79.9663)	sp|Q9H1E3|NUCKS_HUMAN	Q9H1E3	NUCKS_HUMAN	NUCKS1	Nuclear ubiquitous casein and cyclin-dependent kinase substrate 1			1	1.06149e+06	MS/MS	STY:79.9663@DS(0.0339)GS(0.0339)DEDFLMEDDDDS(0.2330)DY(0.2330)GS(0.2330)S(0.2330)K;
DSGSDTASAIIPSTTPSVDSDDESVVK	DSGSDTASAIIPSTTPS[79.9663]VDSDDESVVK	K	D	183	209	27	3	17S(79.9663)	sp|Q6WKZ4|RFIP1_HUMAN	Q6WKZ4	RFIP1_HUMAN	RAB11FIP1	Rab11 family-interacting protein 1			1	0	MS/MS	STY:79.9663@DS(0.0041)GS(0.0041)DT(0.0041)AS(0.0041)AIIPS(0.0043)T(0.0043)T(0.0043)PS(0.3235)VDS(0.3235)DDES(0.3235)VVK;
DSGSQVEEDTSCSDSK	DSGSQVEEDT[79.9663]SC[57.0215]SDSK	K	T	751	766	16	2	10T(79.9663),12C(57.0215)	sp|Q08499|PDE4D_HUMAN	Q08499	PDE4D_HUMAN	PDE4D	3',5'-cyclic-AMP phosphodiesterase 4D			2	1.76237e+06	MS/MS	STY:79.9663@DS(0.0120)GS(0.0120)QVEEDT(0.4762)S(0.4762)CS(0.0093)DS(0.0142)K;
DSPDSPEPPNK	DSPDS[79.9663]PEPPNK	K	K	622	632	11	2	5S(79.9663)	sp|Q9NVM9|INT13_HUMAN	Q9NVM9	INT13_HUMAN	INTS13	Integrator complex subunit 13			2	1.98424e+06	MS/MS	STY:79.9663@DS(0.0568)PDS(0.9432)PEPPNK;
DSQDASAEQSDHDDEVASLASASGGFGTK	DSQDASAEQSDHDDEVAS[79.9663]LASASGGFGTK	R	V	870	898	29	3	18S(79.9663)	sp|Q6P2E9|EDC4_HUMAN	Q6P2E9	EDC4_HUMAN	EDC4	Enhancer of mRNA-decapping protein 4			1	514123	MS/MS	STY:79.9663@DS(0.0050)QDAS(0.0050)AEQS(0.0050)DHDDEVAS(0.2462)LAS(0.2462)AS(0.2462)GGFGT(0.2462)K;
DSSFTEVPRSPK	DSSFTEVPRS[79.9663]PK	R	H	236	247	12	2	10S(79.9663)	sp|O95425|SVIL_HUMAN	O95425	SVIL_HUMAN	SVIL	Supervillin			3	1.07316e+06	MS/MS	STY:79.9663@DS(0.0195)S(0.0195)FT(0.0195)EVPRS(0.9415)PK;
DSSFTEVPRSPK	DSSFT[79.9663]EVPRSPK	R	H	236	247	12	2	5T(79.9663)	sp|O95425|SVIL_HUMAN	O95425	SVIL_HUMAN	SVIL	Supervillin			1	1.07316e+06	MS/MS	STY:79.9663@DS(0.0189)S(0.0189)FT(0.4811)EVPRS(0.4811)PK;
DSSTSPGDYVLSVSENSR	DSSTSPGDYVLS[79.9663]VSENSR	R	V	39	56	18	2	12S(79.9663)	sp|P46108|CRK_HUMAN	P46108	CRK_HUMAN	CRK	Adapter molecule crk			1	0	MS/MS	STY:79.9663@DS(0.0118)S(0.0118)T(0.0118)S(0.0118)PGDY(0.0429)VLS(0.3032)VS(0.3032)ENS(0.3032)R;
DSAIPVESDTDDEGAPR	DS[79.9663]AIPVES[79.9663]DTDDEGAPR	R	I	461	477	17	2	2S(79.9663),8S(79.9663)	sp|Q96D46|NMD3_HUMAN	Q96D46	NMD3_HUMAN	NMD3	60S ribosomal export protein NMD3			1	0	MS/MS	STY:79.9663@DS(0.6667)AIPVES(0.6667)DT(0.6667)DDEGAPR;
DSALAEAPEGLSPAPPAR	DS[79.9663]ALAEAPEGLSPAPPAR	R	S	845	862	18	2	2S(79.9663)	sp|Q9H9J4|UBP42_HUMAN	Q9H9J4	UBP42_HUMAN	USP42	Ubiquitin carboxyl-terminal hydrolase 42			1	1.15553e+06	MS/MS	STY:79.9663@DS(0.5628)ALAEAPEGLS(0.4372)PAPPAR;
DSDQVAQSDGEESPAAEEQLLGEHIK	DS[79.9663]DQVAQSDGEESPAAEEQLLGEHIK	K	E	520	545	26	3	2S(79.9663)	sp|O94979|SC31A_HUMAN	O94979	SC31A_HUMAN	SEC31A	Protein transport protein Sec31A			1	915926	MS/MS	STY:79.9663@DS(0.4483)DQVAQS(0.4483)DGEES(0.1035)PAAEEQLLGEHIK;
DSELSDTDSGCCLGQSESDK	DS[79.9663]ELSDTDSGC[57.0215]C[57.0215]LGQSESDK	R	S	87	106	20	2	11C(57.0215),12C(57.0215),2S(79.9663)	sp|Q96T88|UHRF1_HUMAN	Q96T88	UHRF1_HUMAN	UHRF1	E3 ubiquitin-protein ligase UHRF1			1	601666	MS/MS	STY:79.9663@DS(0.4167)ELS(0.4167)DT(0.0130)DS(0.0130)GCCLGQS(0.0703)ES(0.0703)DK;
DSENLASPSEYPENGER	DS[79.9663]ENLASPSEYPENGER	R	F	617	633	17	2,3	2S(79.9663)	sp|P52948|NUP98_HUMAN	P52948	NUP98_HUMAN	NUP98	Nuclear pore complex protein Nup98-Nup96			2	6994006	MS/MS	STY:79.9663@DS(0.8994)ENLAS(0.0631)PS(0.0183)EY(0.0192)PENGER;
DSESPSQK	DS[79.9663]ESPSQK	K	K	1468	1475	8	2	2S(79.9663)	sp|Q13428|TCOF_HUMAN	Q13428	TCOF_HUMAN	TCOF1	Treacle protein			1	576476	MS/MS	STY:79.9663@DS(0.3779)ES(0.3779)PS(0.2442)QK;
DSGSQVEEDTSCSDSK	DS[79.9663]GSQVEEDTSC[57.0215]SDSK	K	T	751	766	16	2	12C(57.0215),2S(79.9663)	sp|Q08499|PDE4D_HUMAN	Q08499	PDE4D_HUMAN	PDE4D	3',5'-cyclic-AMP phosphodiesterase 4D			3	1.76237e+06	MS/MS	STY:79.9663@DS(0.4773)GS(0.4773)QVEEDT(0.0102)S(0.0102)CS(0.0128)DS(0.0122)K;
DSHSSEEDEASSQTDLSQTISK	DS[79.9663]HS[79.9663]SEEDEASSQTDLSQTISK	R	K	153	174	22	3	2S(79.9663),4S(79.9663)	sp|Q5JTV8|TOIP1_HUMAN	Q5JTV8	TOIP1_HUMAN	TOR1AIP1	Torsin-1A-interacting protein 1			1	494913	MS/MS	STY:79.9663@DS(0.4219)HS(0.4219)S(0.4219)EEDEAS(0.1454)S(0.1454)QT(0.1454)DLS(0.0812)QT(0.1454)IS(0.0714)K;
DSPDSPEPPNK	DS[79.9663]PDSPEPPNK	K	K	622	632	11	2	2S(79.9663)	sp|Q9NVM9|INT13_HUMAN	Q9NVM9	INT13_HUMAN	INTS13	Integrator complex subunit 13			3	1.98424e+06	MS/MS	STY:79.9663@DS(0.8448)PDS(0.1552)PEPPNK;
DSQDASAEQSDHDDEVASLASASGGFGTK	DS[79.9663]QDASAEQSDHDDEVASLASASGGFGTK	R	V	870	898	29	3	2S(79.9663)	sp|Q6P2E9|EDC4_HUMAN	Q6P2E9	EDC4_HUMAN	EDC4	Enhancer of mRNA-decapping protein 4			1	672620	MS/MS	STY:79.9663@DS(0.3978)QDAS(0.3978)AEQS(0.0824)DHDDEVAS(0.0401)LAS(0.0273)AS(0.0273)GGFGT(0.0273)K;
DSSFTEVPRSPK	DS[79.9663]SFTEVPRSPK	R	H	236	247	12	2	2S(79.9663)	sp|O95425|SVIL_HUMAN	O95425	SVIL_HUMAN	SVIL	Supervillin			4	1.07316e+06	MS/MS	STY:79.9663@DS(0.8090)S(0.0637)FT(0.0637)EVPRS(0.0637)PK;
DTIIDVVGAPLTPNSR	DTIIDVVGAPLTPNS[79.9663]R	K	K	434	449	16	2	15S(79.9663)	sp|Q9NPF5|DMAP1_HUMAN	Q9NPF5	DMAP1_HUMAN	DMAP1	DNA methyltransferase 1-associated protein 1			1	0	MS/MS	STY:79.9663@DT(0.0665)IIDVVGAPLT(0.0378)PNS(0.8957)R;
DTLEGAGDTSEVMDTQAGSVDEENGR	DTLEGAGDTSEVMDTQAGS[79.9663]VDEENGR	K	Q	83	108	26	3	19S(79.9663)	sp|Q9UBL3|ASH2L_HUMAN	Q9UBL3	ASH2L_HUMAN	ASH2L	Set1/Ash2 histone methyltransferase complex subunit ASH2			1	869231	MS/MS	STY:79.9663@DT(0.1114)LEGAGDT(0.1114)S(0.1114)EVMDT(0.0113)QAGS(0.6544)VDEENGR;
DTMDLESSSSEEEK	DTMDLES[79.9663]SSSEEEK	R	E	399	412	14	2	7S(79.9663)	sp|Q5JRA6|TGO1_HUMAN	Q5JRA6	TGO1_HUMAN	MIA3	Transport and Golgi organization protein 1 homolog			1	0	MS/MS	STY:79.9663@DT(0.0206)MDLES(0.2448)S(0.2448)S(0.2448)S(0.2448)EEEK;
DTSATSQSVNGSPQAEQPSLESTSK	DTSATSQSVNGSPQAEQPSLES[79.9663]TSK	K	E	51	75	25	3	22S(79.9663)	sp|Q86WB0|ZC3C1_HUMAN	Q86WB0	ZC3C1_HUMAN	ZC3HC1	Zinc finger C3HC-type protein 1			1	1.02585e+06	MS/MS	STY:79.9663@DT(0.0099)S(0.0099)AT(0.0181)S(0.0181)QS(0.0181)VNGS(0.0181)PQAEQPS(0.0264)LES(0.8614)T(0.0100)S(0.0100)K;
DTSENADGQSDENKDDYTIPDEYR	DTSENADGQSDENKDDYTIPDEY[79.9663]R	K	I	757	780	24	3	23Y(79.9663)	sp|P43243|MATR3_HUMAN	P43243	MATR3_HUMAN	MATR3	Matrin-3			1	4.79405e+06	MS/MS	STY:79.9663@DT(0.0142)S(0.0142)ENADGQS(0.0573)DENKDDY(0.0573)T(0.0573)IPDEY(0.7998)R;
DTSENADGQSDENKDDYTIPDEYR	DTSENADGQSDENKDDY[79.9663]TIPDEYR	K	I	757	780	24	3	17Y(79.9663)	sp|P43243|MATR3_HUMAN	P43243	MATR3_HUMAN	MATR3	Matrin-3			2	4.79405e+06	MS/MS	STY:79.9663@DT(0.0129)S(0.0129)ENADGQS(0.0142)DENKDDY(0.9372)T(0.0117)IPDEY(0.0112)R;
DTSENADGQSDENK	DTSENADGQS[79.9663]DENK	K	D	757	770	14	2	10S(79.9663)	sp|P43243|MATR3_HUMAN	P43243	MATR3_HUMAN	MATR3	Matrin-3			3	1.1322e+06	MS/MS	STY:79.9663@DT(0.0488)S(0.0488)ENADGQS(0.9024)DENK;
DTSENADGQSDENKDDYTIPDEYR	DTSENADGQS[79.9663]DENKDDYTIPDEYR	K	I	757	780	24	3	10S(79.9663)	sp|P43243|MATR3_HUMAN	P43243	MATR3_HUMAN	MATR3	Matrin-3			5	6688425	MS/MS	STY:79.9663@DT(0.0156)S(0.0156)ENADGQS(0.9331)DENKDDY(0.0121)T(0.0121)IPDEY(0.0116)R;
DTSPSSGSAVSSSK	DTSPSSGSAVSSS[79.9663]K	R	V	203	216	14	2	13S(79.9663)	sp|Q8NEY8|PPHLN_HUMAN	Q8NEY8	PPHLN_HUMAN	PPHLN1	Periphilin-1			2	1.17878e+06	MS/MS	STY:79.9663@DT(0.0083)S(0.0083)PS(0.0083)S(0.0083)GS(0.0083)AVS(0.0083)S(0.0083)S(0.9421)K;
DTSPSSGSAVSSSK	DTSPSSGSAVSS[79.9663]SK	R	V	203	216	14	2	12S(79.9663)	sp|Q8NEY8|PPHLN_HUMAN	Q8NEY8	PPHLN_HUMAN	PPHLN1	Periphilin-1			1	245086	MS/MS	STY:79.9663@DT(0.1925)S(0.0946)PS(0.0946)S(0.0946)GS(0.0946)AVS(0.0040)S(0.2126)S(0.2126)K;
DTSATSQSVNGSPQAEQPSLESTSK	DT[79.9663]SATSQSVNGSPQAEQPSLESTSK	K	E	51	75	25	3	2T(79.9663)	sp|Q86WB0|ZC3C1_HUMAN	Q86WB0	ZC3C1_HUMAN	ZC3HC1	Zinc finger C3HC-type protein 1			2	0	MS/MS	STY:79.9663@DT(0.1956)S(0.1956)AT(0.1956)S(0.1956)QS(0.1956)VNGS(0.0101)PQAEQPS(0.0029)LES(0.0029)T(0.0029)S(0.0029)K;
DTSENADGQSDENK	DT[79.9663]SENADGQSDENK	K	D	757	770	14	2	2T(79.9663)	sp|P43243|MATR3_HUMAN	P43243	MATR3_HUMAN	MATR3	Matrin-3			4	1.1322e+06	MS/MS	STY:79.9663@DT(0.4764)S(0.4764)ENADGQS(0.0473)DENK;
DTSENADGQSDENKDDYTIPDEYR	DT[79.9663]SENADGQSDENKDDYTIPDEYR	K	I	757	780	24	3	2T(79.9663)	sp|P43243|MATR3_HUMAN	P43243	MATR3_HUMAN	MATR3	Matrin-3			10	5836063	MS/MS	STY:79.9663@DT(0.4667)S(0.4667)ENADGQS(0.0263)DENKDDY(0.0129)T(0.0129)IPDEY(0.0146)R;
DTSGLER	DT[79.9663]SGLER	R	S	656	662	7	2	2T(79.9663)	sp|Q9H307|PININ_HUMAN	Q9H307	PININ_HUMAN	PNN	Pinin			1	374845	MS/MS	STY:79.9663@DT(0.5000)S(0.5000)GLER;
DTSPSSGSAVSSSK	DT[79.9663]SPSSGSAVSSSK	R	V	203	216	14	2	2T(79.9663)	sp|Q8NEY8|PPHLN_HUMAN	Q8NEY8	PPHLN_HUMAN	PPHLN1	Periphilin-1			3	1.17878e+06	MS/MS	STY:79.9663@DT(0.4698)S(0.4698)PS(0.0101)S(0.0101)GS(0.0101)AVS(0.0101)S(0.0101)S(0.0101)K;
DVDVSEDSPPPLPER	DVDVSEDS[79.9663]PPPLPER	K	T	666	680	15	2	8S(79.9663)	sp|Q05209|PTN12_HUMAN	Q05209	PTN12_HUMAN	PTPN12	Tyrosine-protein phosphatase non-receptor type 12			3	2.53141e+06	MS/MS	STY:79.9663@DVDVS(0.0660)EDS(0.9340)PPPLPER;
DVDVSEDSPPPLPER	DVDVS[79.9663]EDSPPPLPER	K	T	666	680	15	2	5S(79.9663)	sp|Q05209|PTN12_HUMAN	Q05209	PTN12_HUMAN	PTPN12	Tyrosine-protein phosphatase non-receptor type 12			4	3166633	MS/MS	STY:79.9663@DVDVS(0.9207)EDS(0.0793)PPPLPER;
DVEDMELSDVEDDGSK	DVEDMELS[79.9663]DVEDDGSK	R	I	367	382	16	2	8S(79.9663)	sp|Q5VT52|RPRD2_HUMAN	Q5VT52	RPRD2_HUMAN	RPRD2	Regulation of nuclear pre-mRNA domain-containing protein 2			4	3.08323e+06	MS/MS	STY:79.9663@DVEDMELS(0.9463)DVEDDGS(0.0537)K;
DVEDMELSDVEDDGSK	DVEDM[15.9949]ELSDVEDDGS[79.9663]K	R	I	367	382	16	2	15S(79.9663),5M(15.9949)	sp|Q5VT52|RPRD2_HUMAN	Q5VT52	RPRD2_HUMAN	RPRD2	Regulation of nuclear pre-mRNA domain-containing protein 2			1	0	MS/MS	STY:79.9663@DVEDMELS(0.4734)DVEDDGS(0.5266)K;M:15.9949@DVEDM(1.0000)ELSDVEDDGSK;
DVEDMELSDVEDDGSK	DVEDM[15.9949]ELS[79.9663]DVEDDGSK	R	I	367	382	16	2	5M(15.9949),8S(79.9663)	sp|Q5VT52|RPRD2_HUMAN	Q5VT52	RPRD2_HUMAN	RPRD2	Regulation of nuclear pre-mRNA domain-containing protein 2			2	0	MS/MS	STY:79.9663@DVEDMELS(0.9393)DVEDDGS(0.0607)K;M:15.9949@DVEDM(1.0000)ELSDVEDDGSK;
DVMSDETNNEETESPSQEFVNITK	DVM[15.9949]SDETNNEETESPSQEFVNIT[79.9663]K	R	Y	1141	1164	24	3	23T(79.9663),3M(15.9949)	sp|P46821|MAP1B_HUMAN	P46821	MAP1B_HUMAN	MAP1B	Microtubule-associated protein 1B			1	0	MS/MS	STY:79.9663@DVMS(0.1151)DET(0.1151)NNEET(0.0118)ES(0.0179)PS(0.0240)QEFVNIT(0.7162)K;M:15.9949@DVM(1.0000)SDETNNEETESPSQEFVNITK;
DVTLSPVK	DVTLS[79.9663]PVK	K	A	1527	1534	8	2	5S(79.9663)	sp|Q8NFC6|BD1L1_HUMAN	Q8NFC6	BD1L1_HUMAN	BOD1L1	Biorientation of chromosomes in cell division protein 1-like 1			1	783533	MS/MS	STY:79.9663@DVT(0.0538)LS(0.9462)PVK;
DVTPPPETEVVLIK	DVTPPPET[79.9663]EVVLIK	K	N	519	532	14	2	8T(79.9663)	sp|P27816|MAP4_HUMAN	P27816	MAP4_HUMAN	MAP4	Microtubule-associated protein 4			1	1.6342735E7	MS/MS	STY:79.9663@DVT(0.0749)PPPET(0.9251)EVVLIK;
DVTPPPETEVVLIK	DVT[79.9663]PPPETEVVLIK	K	N	519	532	14	2,3	3T(79.9663)	sp|P27816|MAP4_HUMAN	P27816	MAP4_HUMAN	MAP4	Microtubule-associated protein 4			20	3.6918676E7	MS/MS	STY:79.9663@DVT(0.9470)PPPET(0.0530)EVVLIK;
DVYLSPR	DVYLS[79.9663]PR	R	D	204	210	7	2	5S(79.9663)	sp|P38159|RBMX_HUMAN	P38159	RBMX_HUMAN	RBMX	RNA-binding motif protein, X chromosome	RBMXL1	sp|Q96E39|RMXL1_HUMAN	1	387660	MS/MS	STY:79.9663@DVY(0.2511)LS(0.7489)PR;
DVYLSPR	DVY[79.9663]LSPR	R	D	204	210	7	2	3Y(79.9663)	sp|P38159|RBMX_HUMAN	P38159	RBMX_HUMAN	RBMX	RNA-binding motif protein, X chromosome	RBMXL1	sp|Q96E39|RMXL1_HUMAN	7	9190591	MS/MS	STY:79.9663@DVY(0.8647)LS(0.1353)PR;
DWEDDSDEDMSNFDR	DWEDDSDEDM[15.9949]S[79.9663]NFDR	K	F	108	122	15	2	10M(15.9949),11S(79.9663)	sp|Q15185|TEBP_HUMAN	Q15185	TEBP_HUMAN	PTGES3	Prostaglandin E synthase 3			1	6.90343e+06	MS/MS	STY:79.9663@DWEDDS(0.3386)DEDMS(0.6614)NFDR;M:15.9949@DWEDDSDEDM(1.0000)SNFDR;
DWEDDSDEDMSNFDR	DWEDDS[79.9663]DEDMSNFDR	K	F	108	122	15	2	6S(79.9663)	sp|Q15185|TEBP_HUMAN	Q15185	TEBP_HUMAN	PTGES3	Prostaglandin E synthase 3			9	1.9829192E7	MS/MS	STY:79.9663@DWEDDS(0.9468)DEDMS(0.0532)NFDR;
DWEDDSDEDMSNFDR	DWEDDS[79.9663]DEDM[15.9949]SNFDR	K	F	108	122	15	2	10M(15.9949),6S(79.9663)	sp|Q15185|TEBP_HUMAN	Q15185	TEBP_HUMAN	PTGES3	Prostaglandin E synthase 3			4	6.90343e+06	MS/MS	STY:79.9663@DWEDDS(0.9318)DEDMS(0.0682)NFDR;M:15.9949@DWEDDSDEDM(1.0000)SNFDR;
DYDDMSPR	DYDDMS[79.9663]PR	R	R	279	286	8	2	6S(79.9663)	sp|P61978|HNRPK_HUMAN	P61978	HNRPK_HUMAN	HNRNPK	Heterogeneous nuclear ribonucleoprotein K			6	1.2004264E7	MS/MS	STY:79.9663@DY(0.0537)DDMS(0.9463)PR;
DYDEEEQGYDSEK	DYDEEEQGYDS[79.9663]EK	R	E	424	436	13	2	11S(79.9663)	sp|Q05519|SRS11_HUMAN	Q05519	SRS11_HUMAN	SRSF11	Serine/arginine-rich splicing factor 11			2	6.7924e+06	MS/MS	STY:79.9663@DY(0.0278)DEEEQGY(0.0330)DS(0.9393)EK;
DYDEEEQGYDSEK	DYDEEEQGY[79.9663]DSEK	R	E	424	436	13	2	9Y(79.9663)	sp|Q05519|SRS11_HUMAN	Q05519	SRS11_HUMAN	SRSF11	Serine/arginine-rich splicing factor 11			3	7.95134e+06	MS/MS	STY:79.9663@DY(0.0336)DEEEQGY(0.4832)DS(0.4832)EK;
DYEEVGADSADGEDEGEEY	DYEEVGADSADGEDEGEEY[79.9663]	K	-	431	449	19	2	19Y(79.9663)	sp|Q9BQE3|TBA1C_HUMAN	Q9BQE3	TBA1C_HUMAN	TUBA1C	Tubulin alpha-1C chain			1	1.4675972E7	MS/MS	STY:79.9663@DY(0.4095)EEVGADS(0.0903)ADGEDEGEEY(0.5002);
DYEEVGADSADGEDEGEEY	DYEEVGADS[79.9663]ADGEDEGEEY	K	-	431	449	19	2	9S(79.9663)	sp|Q9BQE3|TBA1C_HUMAN	Q9BQE3	TBA1C_HUMAN	TUBA1C	Tubulin alpha-1C chain			2	1.4675972E7	MS/MS	STY:79.9663@DY(0.0470)EEVGADS(0.9230)ADGEDEGEEY(0.0300);
DYEIESQNPLASPTNTLLGSAK	DYEIESQNPLASPTNTLLGS[79.9663]AK	K	E	618	639	22	3	20S(79.9663)	sp|Q7Z417|NUFP2_HUMAN	Q7Z417	NUFP2_HUMAN	NUFIP2	FMR1-interacting protein NUFIP2			2	2.12367e+06	MS/MS	STY:79.9663@DY(0.2698)EIES(0.1412)QNPLAS(0.0186)PT(0.0186)NT(0.0186)LLGS(0.5330)AK;
DYEIESQNPLASPTNTLLGSAK	DYEIESQNPLAS[79.9663]PTNTLLGSAK	K	E	618	639	22	3	12S(79.9663)	sp|Q7Z417|NUFP2_HUMAN	Q7Z417	NUFP2_HUMAN	NUFIP2	FMR1-interacting protein NUFIP2			1	1.38591e+06	MS/MS	STY:79.9663@DY(0.0298)EIES(0.0298)QNPLAS(0.4608)PT(0.4608)NT(0.0105)LLGS(0.0083)AK;
DYNASASTISPPSSMEEDK	DYNASASTIS[79.9663]PPSSM[15.9949]EEDK	K	F	1199	1217	19	2	10S(79.9663),15M(15.9949)	sp|P46821|MAP1B_HUMAN	P46821	MAP1B_HUMAN	MAP1B	Microtubule-associated protein 1B			1	652835	MS/MS	STY:79.9663@DY(0.0075)NAS(0.0124)AS(0.0124)T(0.0124)IS(0.3184)PPS(0.3184)S(0.3184)MEEDK;M:15.9949@DYNASASTISPPSSM(1.0000)EEDK;
DYNASASTISPPSSMEEDK	DYNASAST[79.9663]ISPPSSMEEDK	K	F	1199	1217	19	2	8T(79.9663)	sp|P46821|MAP1B_HUMAN	P46821	MAP1B_HUMAN	MAP1B	Microtubule-associated protein 1B			1	1.07825e+06	MS/MS	STY:79.9663@DY(0.1720)NAS(0.0106)AS(0.0106)T(0.2017)IS(0.2017)PPS(0.2017)S(0.2017)MEEDK;
DYDDMSPR	DY[79.9663]DDMSPR	R	R	279	286	8	2	2Y(79.9663)	sp|P61978|HNRPK_HUMAN	P61978	HNRPK_HUMAN	HNRNPK	Heterogeneous nuclear ribonucleoprotein K			4	1.2004264E7	MS/MS	STY:79.9663@DY(0.5000)DDMS(0.5000)PR;
DYDDMSPR	DY[79.9663]DDM[15.9949]SPR	R	R	279	286	8	2	2Y(79.9663),5M(15.9949)	sp|P61978|HNRPK_HUMAN	P61978	HNRPK_HUMAN	HNRNPK	Heterogeneous nuclear ribonucleoprotein K			2	576444	MS/MS	STY:79.9663@DY(0.9405)DDMS(0.0595)PR;M:15.9949@DYDDM(1.0000)SPR;
DYDVYSDNDICSQESEDNFAK	DY[79.9663]DVYSDNDIC[57.0215]SQESEDNFAK	K	E	72	92	21	3	11C(57.0215),2Y(79.9663)	sp|Q8N5P1|ZC3H8_HUMAN	Q8N5P1	ZC3H8_HUMAN	ZC3H8	Zinc finger CCCH domain-containing protein 8			1	0	MS/MS	STY:79.9663@DY(0.3059)DVY(0.3059)S(0.3059)DNDICS(0.0125)QES(0.0696)EDNFAK;
DYEEVGVDSVEGEGEEEGEEY	DY[79.9663]EEVGVDSVEGEGEEEGEEY	K	-	431	451	21	2	2Y(79.9663)	sp|P68363|TBA1B_HUMAN	P68363	TBA1B_HUMAN	TUBA1B	Tubulin alpha-1B chain	TUBA1A	sp|Q71U36|TBA1A_HUMAN	1	0	MS/MS	STY:79.9663@DY(0.3597)EEVGVDS(0.3597)VEGEGEEEGEEY(0.2806);
DYNASASTISPPSSMEEDK	DY[79.9663]NASASTISPPSSMEEDK	K	F	1199	1217	19	2	2Y(79.9663)	sp|P46821|MAP1B_HUMAN	P46821	MAP1B_HUMAN	MAP1B	Microtubule-associated protein 1B			1	874640	MS/MS	STY:79.9663@DY(0.4600)NAS(0.4600)AS(0.0215)T(0.0215)IS(0.0215)PPS(0.0078)S(0.0078)MEEDK;
EAALPPVSPLK	EAALPPVS[79.9663]PLK	R	A	1224	1234	11	2	8S(79.9663)	sp|Q04637|IF4G1_HUMAN	Q04637	IF4G1_HUMAN	EIF4G1	Eukaryotic translation initiation factor 4 gamma 1			16	4365871	MS/MS	STY:79.9663@EAALPPVS(1.0000)PLK;
EAANEAGDSSQDEAEDDVK	EAANEAGDS[79.9663]SQDEAEDDVK	R	Q	153	171	19	2	9S(79.9663)	sp|Q9NVU0|RPC5_HUMAN	Q9NVU0	RPC5_HUMAN	POLR3E	DNA-directed RNA polymerase III subunit RPC5			1	480570	MS/MS	STY:79.9663@EAANEAGDS(0.5000)S(0.5000)QDEAEDDVK;
EAASGTTPQK	EAASGT[79.9663]TPQK	K	S	1264	1273	10	2	6T(79.9663)	sp|Q13428|TCOF_HUMAN	Q13428	TCOF_HUMAN	TCOF1	Treacle protein			1	412749	MS/MS	STY:79.9663@EAAS(0.0197)GT(0.4901)T(0.4901)PQK;
EAASSPAGEPLR	EAAS[79.9663]SPAGEPLR	R	K	23	34	12	2	4S(79.9663)	sp|Q96EB6|SIR1_HUMAN	Q96EB6	SIR1_HUMAN	SIRT1	NAD-dependent protein deacetylase sirtuin-1			2	607052	MS/MS	STY:79.9663@EAAS(0.5000)S(0.5000)PAGEPLR;
EADDDEEVDDNIPEMPSPK	EADDDEEVDDNIPEMPS[79.9663]PK	K	K	698	716	19	2,3	17S(79.9663)	sp|P26358|DNMT1_HUMAN	P26358	DNMT1_HUMAN	DNMT1	DNA (cytosine-5)-methyltransferase 1			8	3.82361e+06	MS/MS	STY:79.9663@EADDDEEVDDNIPEMPS(1.0000)PK;
EADDDEEVDDNIPEMPSPK	EADDDEEVDDNIPEM[15.9949]PS[79.9663]PK	K	K	698	716	19	2	15M(15.9949),17S(79.9663)	sp|P26358|DNMT1_HUMAN	P26358	DNMT1_HUMAN	DNMT1	DNA (cytosine-5)-methyltransferase 1			1	0	MS/MS	STY:79.9663@EADDDEEVDDNIPEMPS(1.0000)PK;M:15.9949@EADDDEEVDDNIPEM(1.0000)PSPK;
EADEEGGENGPADQGFQPQEEEEREDSDTEEQVPEALER	EADEEGGENGPADQGFQPQEEEEREDS[79.9663]DTEEQVPEALER	K	K	4989	5027	39	4	27S(79.9663)	sp|Q9NU22|MDN1_HUMAN	Q9NU22	MDN1_HUMAN	MDN1	Midasin			2	1.76589e+06	MS/MS	STY:79.9663@EADEEGGENGPADQGFQPQEEEEREDS(0.5000)DT(0.5000)EEQVPEALER;
EAEEESDHN	EAEEES[79.9663]DHN	R	-	1591	1599	9	2	6S(79.9663)	sp|Q04637|IF4G1_HUMAN	Q04637	IF4G1_HUMAN	EIF4G1	Eukaryotic translation initiation factor 4 gamma 1			4	384176	MS/MS	STY:79.9663@EAEEES(1.0000)DHN;
EAEEESSGGEEEDEDENIEVVYSK	EAEEES[79.9663]S[79.9663]GGEEEDEDENIEVVYSK	K	A	384	407	24	3	6S(79.9663),7S(79.9663)	sp|P55010|IF5_HUMAN	P55010	IF5_HUMAN	EIF5	Eukaryotic translation initiation factor 5			4	836359	MS/MS	STY:79.9663@EAEEES(0.5143)S(0.5143)GGEEEDEDENIEVVY(0.4857)S(0.4857)K;
EAEEGEDDRDSANGEDDS	EAEEGEDDRDSANGEDDS[79.9663]	K	-	289	306	18	2	18S(79.9663)	sp|P07910|HNRPC_HUMAN	P07910	HNRPC_HUMAN	HNRNPC	Heterogeneous nuclear ribonucleoproteins C1/C2			17	6.8769704E7	MS/MS	STY:79.9663@EAEEGEDDRDS(0.0737)ANGEDDS(0.9263);
EAEEGEDDRDSANGEDDS	EAEEGEDDRDS[79.9663]ANGEDDS	K	-	289	306	18	2	11S(79.9663)	sp|P07910|HNRPC_HUMAN	P07910	HNRPC_HUMAN	HNRNPC	Heterogeneous nuclear ribonucleoproteins C1/C2			73	7.1598464E7	MS/MS	STY:79.9663@EAEEGEDDRDS(0.9446)ANGEDDS(0.0554);
EAELESPEVMPEEEDEDDEDGGEEAPAPGGAGK	EAELES[79.9663]PEVMPEEEDEDDEDGGEEAPAPGGAGK	R	S	882	914	33	3	6S(79.9663)	sp|Q8IX01|SUGP2_HUMAN	Q8IX01	SUGP2_HUMAN	SUGP2	SURP and G-patch domain-containing protein 2			2	0	MS/MS	STY:79.9663@EAELES(1.0000)PEVMPEEEDEDDEDGGEEAPAPGGAGK;
EALGQNEESPK	EALGQNEES[79.9663]PK	K	Q	390	400	11	2	9S(79.9663)	sp|Q9H8Y5|ANKZ1_HUMAN	Q9H8Y5	ANKZ1_HUMAN	ANKZF1	tRNA endonuclease ANKZF1			2	325162	MS/MS	STY:79.9663@EALGQNEES(1.0000)PK;
EAPAEGEAAEPGSPTAAEGEAASAASSTSSPK	EAPAEGEAAEPGSPTAAEGEAASAASSTSS[79.9663]PK	K	A	106	137	32	3	30S(79.9663)	sp|P29966|MARCS_HUMAN	P29966	MARCS_HUMAN	MARCKS	Myristoylated alanine-rich C-kinase substrate			1	604092	MS/MS	STY:79.9663@EAPAEGEAAEPGS(0.1116)PT(0.1365)AAEGEAAS(0.0085)AAS(0.0113)S(0.0113)T(0.0184)S(0.0184)S(0.6840)PK;
EAPAEGEAAEPGSPTAAEGEAASAASSTSSPK	EAPAEGEAAEPGSPTAAEGEAASAASST[79.9663]SSPK	K	A	106	137	32	3	28T(79.9663)	sp|P29966|MARCS_HUMAN	P29966	MARCS_HUMAN	MARCKS	Myristoylated alanine-rich C-kinase substrate			1	2868861	MS/MS	STY:79.9663@EAPAEGEAAEPGS(0.0048)PT(0.0048)AAEGEAAS(0.0045)AAS(0.0142)S(0.0142)T(0.3192)S(0.3192)S(0.3192)PK;
EAPAEGEAAEPGSPTAAEGEAASAASSTSSPK	EAPAEGEAAEPGSPTAAEGEAASAASS[79.9663]TSSPK	K	A	106	137	32	3	27S(79.9663)	sp|P29966|MARCS_HUMAN	P29966	MARCS_HUMAN	MARCKS	Myristoylated alanine-rich C-kinase substrate			1	2868861	MS/MS	STY:79.9663@EAPAEGEAAEPGS(0.0092)PT(0.0092)AAEGEAAS(0.0107)AAS(0.0107)S(0.4590)T(0.4590)S(0.0212)S(0.0212)PK;
EAPAEGEAAEPGSPTAAEGEAASAASSTSSPK	EAPAEGEAAEPGSPTAAEGEAASAAS[79.9663]STSSPK	K	A	106	137	32	3	26S(79.9663)	sp|P29966|MARCS_HUMAN	P29966	MARCS_HUMAN	MARCKS	Myristoylated alanine-rich C-kinase substrate			1	2868861	MS/MS	STY:79.9663@EAPAEGEAAEPGS(0.0065)PT(0.0065)AAEGEAAS(0.0065)AAS(0.1961)S(0.1961)T(0.1961)S(0.1961)S(0.1961)PK;
EAPAEGEAAEPGSPTAAEGEAASAASSTSSPK	EAPAEGEAAEPGSPTAAEGEAAS[79.9663]AASSTSSPK	K	A	106	137	32	3	23S(79.9663)	sp|P29966|MARCS_HUMAN	P29966	MARCS_HUMAN	MARCKS	Myristoylated alanine-rich C-kinase substrate			3	2.6904734E7	MS/MS	STY:79.9663@EAPAEGEAAEPGS(0.0145)PT(0.0145)AAEGEAAS(0.9223)AAS(0.0097)S(0.0097)T(0.0097)S(0.0097)S(0.0097)PK;
EAPAEGEAAEPGSPTAAEGEAASAASSTSSPK	EAPAEGEAAEPGSPTAAEGEAAS[79.9663]AASST[79.9663]SSPK	K	A	106	137	32	3	23S(79.9663),28T(79.9663)	sp|P29966|MARCS_HUMAN	P29966	MARCS_HUMAN	MARCKS	Myristoylated alanine-rich C-kinase substrate			1	2.42227e+06	MS/MS	STY:79.9663@EAPAEGEAAEPGS(0.3034)PT(0.0249)AAEGEAAS(0.4505)AAS(0.0125)S(0.0125)T(0.3988)S(0.3988)S(0.3988)PK;
EAPAEGEAAEPGSPTAAEGEAASAASSTSSPK	EAPAEGEAAEPGSPT[79.9663]AAEGEAASAASSTSSPK	K	A	106	137	32	3	15T(79.9663)	sp|P29966|MARCS_HUMAN	P29966	MARCS_HUMAN	MARCKS	Myristoylated alanine-rich C-kinase substrate			2	2.5369916E7	MS/MS	STY:79.9663@EAPAEGEAAEPGS(0.0142)PT(0.8280)AAEGEAAS(0.0380)AAS(0.0380)S(0.0204)T(0.0204)S(0.0204)S(0.0204)PK;
EAPAEGEAAEPGSPTAAEGEAASAASSTSSPK	EAPAEGEAAEPGS[79.9663]PTAAEGEAASAASSTSSPK	K	A	106	137	32	3	13S(79.9663)	sp|P29966|MARCS_HUMAN	P29966	MARCS_HUMAN	MARCKS	Myristoylated alanine-rich C-kinase substrate			6	2.5369916E7	MS/MS	STY:79.9663@EAPAEGEAAEPGS(0.9211)PT(0.0219)AAEGEAAS(0.0121)AAS(0.0090)S(0.0090)T(0.0090)S(0.0090)S(0.0090)PK;
EAPAEGEAAEPGSPTAAEGEAASAASSTSSPK	EAPAEGEAAEPGS[79.9663]PTAAEGEAASAASS[79.9663]TSSPK	K	A	106	137	32	3	13S(79.9663),27S(79.9663)	sp|P29966|MARCS_HUMAN	P29966	MARCS_HUMAN	MARCKS	Myristoylated alanine-rich C-kinase substrate			1	2.42227e+06	MS/MS	STY:79.9663@EAPAEGEAAEPGS(0.4310)PT(0.1190)AAEGEAAS(0.0091)AAS(0.0091)S(0.3580)T(0.3580)S(0.3580)S(0.3580)PK;
EAPAEGEAAEPGSPTAAEGEAASAASSTSSPK	EAPAEGEAAEPGS[79.9663]PTAAEGEAAS[79.9663]AASSTSSPK	K	A	106	137	32	3	13S(79.9663),23S(79.9663)	sp|P29966|MARCS_HUMAN	P29966	MARCS_HUMAN	MARCKS	Myristoylated alanine-rich C-kinase substrate			1	2.42227e+06	MS/MS	STY:79.9663@EAPAEGEAAEPGS(0.3425)PT(0.0095)AAEGEAAS(0.2747)AAS(0.2747)S(0.2747)T(0.2747)S(0.2747)S(0.2747)PK;
EAPAEGEAAEPGSPTAAEGEAASAASSTSSPK	EAPAEGEAAEPGS[79.9663]PT[79.9663]AAEGEAASAASSTSSPK	K	A	106	137	32	3	13S(79.9663),15T(79.9663)	sp|P29966|MARCS_HUMAN	P29966	MARCS_HUMAN	MARCKS	Myristoylated alanine-rich C-kinase substrate			2	2.42227e+06	MS/MS	STY:79.9663@EAPAEGEAAEPGS(0.3405)PT(0.3405)AAEGEAAS(0.0115)AAS(0.1430)S(0.1430)T(0.3405)S(0.3405)S(0.3405)PK;
EAPGSPPLSPR	EAPGS[79.9663]PPLSPR	R	G	17	27	11	2	5S(79.9663)	sp|Q86UU0|BCL9L_HUMAN	Q86UU0	BCL9L_HUMAN	BCL9L	B-cell CLL/lymphoma 9-like protein			2	817448	MS/MS	STY:79.9663@EAPGS(0.5000)PPLS(0.5000)PR;
EAQTLDSQIQETSI	EAQTLDSQIQET[79.9663]SI	R	-	1139	1152	14	2	12T(79.9663)	sp|P27816|MAP4_HUMAN	P27816	MAP4_HUMAN	MAP4	Microtubule-associated protein 4			2	1.9598e+06	MS/MS	STY:79.9663@EAQT(0.0173)LDS(0.0257)QIQET(0.4785)S(0.4785)I;
EASENETDMEDPR	EAS[79.9663]ENETDMEDPR	K	E	6359	6371	13	2	3S(79.9663)	sp|Q8WXH0|SYNE2_HUMAN	Q8WXH0	SYNE2_HUMAN	SYNE2	Nesprin-2			2	887013	MS/MS	STY:79.9663@EAS(0.9356)ENET(0.0644)DMEDPR;
EATGLSPQAAQEK	EATGLS[79.9663]PQAAQEK	R	D	8	20	13	2	6S(79.9663)	sp|P17029|ZKSC1_HUMAN	P17029	ZKSC1_HUMAN	ZKSCAN1	Zinc finger protein with KRAB and SCAN domains 1			1	576826	MS/MS	STY:79.9663@EAT(0.4317)GLS(0.5683)PQAAQEK;
EATNTTSEPSAPSQDLLDLSPSPR	EATNTTSEPSAPSQDLLDLS[79.9663]PSPR	K	M	302	325	24	3	20S(79.9663)	sp|O75674|TM1L1_HUMAN	O75674	TM1L1_HUMAN	TOM1L1	TOM1-like protein 1			2	786432	MS/MS	STY:79.9663@EAT(0.0083)NT(0.0083)T(0.0083)S(0.0083)EPS(0.0083)APS(0.0083)QDLLDLS(0.4751)PS(0.4751)PR;
EATNTTSEPSAPSQDLLDLSPSPR	EAT[79.9663]NTTSEPSAPSQDLLDLSPSPR	K	M	302	325	24	3	3T(79.9663)	sp|O75674|TM1L1_HUMAN	O75674	TM1L1_HUMAN	TOM1L1	TOM1-like protein 1			1	1.62693e+06	MS/MS	STY:79.9663@EAT(0.2450)NT(0.2450)T(0.2450)S(0.2450)EPS(0.0042)APS(0.0038)QDLLDLS(0.0060)PS(0.0060)PR;
EAYSGCSGPVDSECPPPPSSPVHK	EAYSGC[57.0215]SGPVDSEC[57.0215]PPPPS[79.9663]SPVHK	K	A	246	269	24	3	14C(57.0215),19S(79.9663),6C(57.0215)	sp|Q8N556|AFAP1_HUMAN	Q8N556	AFAP1_HUMAN	AFAP1	Actin filament-associated protein 1			3	2.45724e+06	MS/MS	STY:79.9663@EAY(0.0091)S(0.0091)GCS(0.0092)GPVDS(0.0092)ECPPPPS(0.4817)S(0.4817)PVHK;
EAYSGCSGPVDSECPPPPSSPVHK	EAYSGC[57.0215]SGPVDS[79.9663]EC[57.0215]PPPPSSPVHK	K	A	246	269	24	3	12S(79.9663),14C(57.0215),6C(57.0215)	sp|Q8N556|AFAP1_HUMAN	Q8N556	AFAP1_HUMAN	AFAP1	Actin filament-associated protein 1			1	569485	MS/MS	STY:79.9663@EAY(0.0113)S(0.0113)GCS(0.0113)GPVDS(0.3220)ECPPPPS(0.3220)S(0.3220)PVHK;
EAYSGCSGPVDSECPPPPSSPVHK	EAYSGC[57.0215]S[79.9663]GPVDSEC[57.0215]PPPPSSPVHK	K	A	246	269	24	3	14C(57.0215),6C(57.0215),7S(79.9663)	sp|Q8N556|AFAP1_HUMAN	Q8N556	AFAP1_HUMAN	AFAP1	Actin filament-associated protein 1			1	1.37441e+06	MS/MS	STY:79.9663@EAY(0.0068)S(0.0068)GCS(0.2466)GPVDS(0.2466)ECPPPPS(0.2466)S(0.2466)PVHK;
EAYSGCSGPVDSECPPPPSSPVHK	EAYS[79.9663]GC[57.0215]SGPVDSEC[57.0215]PPPPSSPVHK	K	A	246	269	24	3	14C(57.0215),4S(79.9663),6C(57.0215)	sp|Q8N556|AFAP1_HUMAN	Q8N556	AFAP1_HUMAN	AFAP1	Actin filament-associated protein 1			1	569485	MS/MS	STY:79.9663@EAY(0.0043)S(0.1991)GCS(0.1991)GPVDS(0.1991)ECPPPPS(0.1991)S(0.1991)PVHK;
EAYSGCSGPVDSECPPPPSSPVHK	EAY[79.9663]SGC[57.0215]SGPVDSEC[57.0215]PPPPSSPVHK	K	A	246	269	24	3	14C(57.0215),3Y(79.9663),6C(57.0215)	sp|Q8N556|AFAP1_HUMAN	Q8N556	AFAP1_HUMAN	AFAP1	Actin filament-associated protein 1			1	1.6876e+06	MS/MS	STY:79.9663@EAY(0.2821)S(0.2821)GCS(0.2821)GPVDS(0.0068)ECPPPPS(0.0735)S(0.0735)PVHK;
ECINAAPDSPSK	EC[57.0215]INAAPDSPS[79.9663]K	K	Q	109	120	12	2	11S(79.9663),2C(57.0215)	sp|Q7Z569|BRAP_HUMAN	Q7Z569	BRAP_HUMAN	BRAP	BRCA1-associated protein			1	1.23936e+06	MS/MS	STY:79.9663@ECINAAPDS(0.1025)PS(0.8975)K;
ECINAAPDSPSK	EC[57.0215]INAAPDS[79.9663]PSK	K	Q	109	120	12	2	2C(57.0215),9S(79.9663)	sp|Q7Z569|BRAP_HUMAN	Q7Z569	BRAP_HUMAN	BRAP	BRCA1-associated protein			2	1.23936e+06	MS/MS	STY:79.9663@ECINAAPDS(0.5000)PS(0.5000)K;
ECLSLDPEER	EC[57.0215]LS[79.9663]LDPEER	K	K	438	447	10	2	2C(57.0215),4S(79.9663)	sp|Q8NI08|NCOA7_HUMAN	Q8NI08	NCOA7_HUMAN	NCOA7	Nuclear receptor coactivator 7			1	0	MS/MS	STY:79.9663@ECLS(1.0000)LDPEER;
EDEISPPPPNPVVK	EDEIS[79.9663]PPPPNPVVK	R	G	79	92	14	2,3	5S(79.9663)	sp|P10644|KAP0_HUMAN	P10644	KAP0_HUMAN	PRKAR1A	cAMP-dependent protein kinase type I-alpha regulatory subunit			17	1.1127695E7	MS/MS	STY:79.9663@EDEIS(1.0000)PPPPNPVVK;
EDENDASDDEDDDEK	EDENDAS[79.9663]DDEDDDEK	R	R	256	270	15	2	7S(79.9663)	sp|Q9Y5B6|PAXB1_HUMAN	Q9Y5B6	PAXB1_HUMAN	PAXBP1	PAX3- and PAX7-binding protein 1			2	384591	MS/MS	STY:79.9663@EDENDAS(1.0000)DDEDDDEK;
EDFDSTSSSSSTPPLQPR	EDFDSTS[79.9663]SSSSTPPLQPR	R	D	74	91	18	2	7S(79.9663)	sp|Q13620|CUL4B_HUMAN	Q13620	CUL4B_HUMAN	CUL4B	Cullin-4B			1	0	MS/MS	STY:79.9663@EDFDS(0.0091)T(0.0091)S(0.1636)S(0.1636)S(0.1636)S(0.1636)S(0.1636)T(0.1636)PPLQPR;
EDILENEDEQNSPPK	EDILENEDEQNS[79.9663]PPK	K	K	1272	1286	15	2	12S(79.9663)	sp|Q9NTI5|PDS5B_HUMAN	Q9NTI5	PDS5B_HUMAN	PDS5B	Sister chromatid cohesion protein PDS5 homolog B			1	3.76626e+06	MS/MS	STY:79.9663@EDILENEDEQNS(1.0000)PPK;
EDILENEDEQNSPPKK	EDILENEDEQNS[79.9663]PPKK	K	G	1272	1287	16	2,3	12S(79.9663)	sp|Q9NTI5|PDS5B_HUMAN	Q9NTI5	PDS5B_HUMAN	PDS5B	Sister chromatid cohesion protein PDS5 homolog B			14	1.91141e+06	MS/MS	STY:79.9663@EDILENEDEQNS(1.0000)PPKK;
EDKPPLAPSGGTEGPEQPPPPCPSQTGSPPVGLIK	EDKPPLAPSGGTEGPEQPPPPC[57.0215]PSQT[79.9663]GSPPVGLIK	K	G	607	641	35	3,4	22C(57.0215),26T(79.9663)	sp|Q8WWM7|ATX2L_HUMAN	Q8WWM7	ATX2L_HUMAN	ATXN2L	Ataxin-2-like protein			2	1.10796e+06	MS/MS	STY:79.9663@EDKPPLAPS(0.0100)GGT(0.0100)EGPEQPPPPCPS(0.0114)QT(0.4843)GS(0.4843)PPVGLIK;
EDKPPLAPSGGTEGPEQPPPPCPSQTGSPPVGLIK	EDKPPLAPSGGTEGPEQPPPPC[57.0215]PS[79.9663]QTGSPPVGLIK	K	G	607	641	35	3	22C(57.0215),24S(79.9663)	sp|Q8WWM7|ATX2L_HUMAN	Q8WWM7	ATX2L_HUMAN	ATXN2L	Ataxin-2-like protein			3	1.66299e+06	MS/MS	STY:79.9663@EDKPPLAPS(0.0089)GGT(0.0089)EGPEQPPPPCPS(0.3274)QT(0.3274)GS(0.3274)PPVGLIK;
EDKPPLAPSGGTEGPEQPPPPCPSQTGSPPVGLIK	EDKPPLAPS[79.9663]GGTEGPEQPPPPC[57.0215]PSQTGSPPVGLIK	K	G	607	641	35	3,4	22C(57.0215),9S(79.9663)	sp|Q8WWM7|ATX2L_HUMAN	Q8WWM7	ATX2L_HUMAN	ATXN2L	Ataxin-2-like protein			2	4.6617e+06	MS/MS	STY:79.9663@EDKPPLAPS(0.2895)GGT(0.2895)EGPEQPPPPCPS(0.1403)QT(0.1403)GS(0.1403)PPVGLIK;
EDKSPSEESAPTTSPESVSGSVPSSGSSGR	EDKSPSEES[79.9663]APTTSPESVSGSVPSSGSSGR	R	E	120	149	30	3	9S(79.9663)	sp|P54725|RD23A_HUMAN	P54725	RD23A_HUMAN	RAD23A	UV excision repair protein RAD23 homolog A			1	2152283	MS/MS	STY:79.9663@EDKS(0.0142)PS(0.0142)EES(0.7547)APT(0.0056)T(0.0056)S(0.0056)PES(0.0517)VS(0.0517)GS(0.0242)VPS(0.0242)S(0.0161)GS(0.0161)S(0.0161)GR;
EDKSPSEESAPTTSPESVSGSVPSSGSSGR	EDKS[79.9663]PSEESAPTTSPESVSGSVPSSGSSGR	R	E	120	149	30	3	4S(79.9663)	sp|P54725|RD23A_HUMAN	P54725	RD23A_HUMAN	RAD23A	UV excision repair protein RAD23 homolog A			1	2152283	MS/MS	STY:79.9663@EDKS(0.3141)PS(0.3141)EES(0.3141)APT(0.0077)T(0.0077)S(0.0077)PES(0.0049)VS(0.0049)GS(0.0049)VPS(0.0049)S(0.0049)GS(0.0049)S(0.0049)GR;
EDQEAAELLSEPEEESER	EDQEAAELLS[79.9663]EPEEESER	K	H	1249	1266	18	2	10S(79.9663)	sp|Q63HN8|RN213_HUMAN	Q63HN8	RN213_HUMAN	RNF213	E3 ubiquitin-protein ligase RNF213			1	0	MS/MS	STY:79.9663@EDQEAAELLS(0.9440)EPEEES(0.0560)ER;
EDSGTFSLGK	EDSGTFS[79.9663]LGK	R	M	16	25	10	2	7S(79.9663)	sp|O75569|PRKRA_HUMAN	O75569	PRKRA_HUMAN	PRKRA	Interferon-inducible double-stranded RNA-dependent protein kinase activator A			1	2.52896e+06	MS/MS	STY:79.9663@EDS(0.0305)GT(0.0382)FS(0.9313)LGK;
EDSGTFSLGK	EDS[79.9663]GTFSLGK	R	M	16	25	10	2	3S(79.9663)	sp|O75569|PRKRA_HUMAN	O75569	PRKRA_HUMAN	PRKRA	Interferon-inducible double-stranded RNA-dependent protein kinase activator A			4	2.52896e+06	MS/MS	STY:79.9663@EDS(0.9374)GT(0.0313)FS(0.0313)LGK;
EDSSEEEEEEIDDEEIER	EDS[79.9663]S[79.9663]EEEEEEIDDEEIER	R	R	130	147	18	2	3S(79.9663),4S(79.9663)	sp|P55081|MFAP1_HUMAN	P55081	MFAP1_HUMAN	MFAP1	Microfibrillar-associated protein 1			1	0	MS/MS	STY:79.9663@EDS(1.0000)S(1.0000)EEEEEEIDDEEIER;
EDTDHEEK	EDT[79.9663]DHEEK	K	A	120	127	8	2	3T(79.9663)	sp|O75475|PSIP1_HUMAN	O75475	PSIP1_HUMAN	PSIP1	PC4 and SFRS1-interacting protein			4	2.36345e+06	MS/MS	STY:79.9663@EDT(1.0000)DHEEK;
EDVEVAESPLR	EDVEVAES[79.9663]PLR	R	V	510	520	11	2	8S(79.9663)	sp|Q99567|NUP88_HUMAN	Q99567	NUP88_HUMAN	NUP88	Nuclear pore complex protein Nup88			1	0	MS/MS	STY:79.9663@EDVEVAES(1.0000)PLR;
EEAPASPLRPLYPQISPLK	EEAPAS[79.9663]PLRPLYPQIS[79.9663]PLK	K	I	208	226	19	3	16S(79.9663),6S(79.9663)	sp|P85037|FOXK1_HUMAN	P85037	FOXK1_HUMAN	FOXK1	Forkhead box protein K1			1	0	MS/MS	STY:79.9663@EEAPAS(0.8098)PLRPLY(0.3778)PQIS(0.8123)PLK;
EEASDDDMEGDEAVVR	EEAS[79.9663]DDDMEGDEAVVR	R	C	222	237	16	2	4S(79.9663)	sp|O75643|U520_HUMAN	O75643	U520_HUMAN	SNRNP200	U5 small nuclear ribonucleoprotein 200 kDa helicase			13	1.6463952E7	MS/MS	STY:79.9663@EEAS(1.0000)DDDMEGDEAVVR;
EEASDDDMEGDEAVVR	EEAS[79.9663]DDDM[15.9949]EGDEAVVR	R	C	222	237	16	2	4S(79.9663),8M(15.9949)	sp|O75643|U520_HUMAN	O75643	U520_HUMAN	SNRNP200	U5 small nuclear ribonucleoprotein 200 kDa helicase			8	2.62785e+06	MS/MS	STY:79.9663@EEAS(1.0000)DDDMEGDEAVVR;M:15.9949@EEASDDDM(1.0000)EGDEAVVR;
EEDEEPESPPEK	EEDEEPES[79.9663]PPEK	K	K	207	218	12	2	8S(79.9663)	sp|Q9H1E3|NUCKS_HUMAN	Q9H1E3	NUCKS_HUMAN	NUCKS1	Nuclear ubiquitous casein and cyclin-dependent kinase substrate 1			59	1.92959696E8	MS/MS	STY:79.9663@EEDEEPES(1.0000)PPEK;
EEDEEPESPPEKK	EEDEEPES[79.9663]PPEKK	K	T	207	219	13	2,3	8S(79.9663)	sp|Q9H1E3|NUCKS_HUMAN	Q9H1E3	NUCKS_HUMAN	NUCKS1	Nuclear ubiquitous casein and cyclin-dependent kinase substrate 1			16	8026981	MS/MS	STY:79.9663@EEDEEPES(1.0000)PPEKK;
EEDEPEERSGDETPGSEVPGDK	EEDEPEERSGDETPGS[79.9663]EVPGDK	R	A	153	174	22	3	16S(79.9663)	sp|Q1KMD3|HNRL2_HUMAN	Q1KMD3	HNRL2_HUMAN	HNRNPUL2	Heterogeneous nuclear ribonucleoprotein U-like protein 2			3	1.1542563E7	MS/MS	STY:79.9663@EEDEPEERS(0.0397)GDET(0.0486)PGS(0.9117)EVPGDK;
EEDEPEERSGDETPGSEVPGDK	EEDEPEERSGDET[79.9663]PGSEVPGDK	R	A	153	174	22	3	13T(79.9663)	sp|Q1KMD3|HNRL2_HUMAN	Q1KMD3	HNRL2_HUMAN	HNRNPUL2	Heterogeneous nuclear ribonucleoprotein U-like protein 2			3	1.1542563E7	MS/MS	STY:79.9663@EEDEPEERS(0.0554)GDET(0.9098)PGS(0.0347)EVPGDK;
EEDEPEERSGDETPGSEVPGDK	EEDEPEERS[79.9663]GDETPGSEVPGDK	R	A	153	174	22	2,3	9S(79.9663)	sp|Q1KMD3|HNRL2_HUMAN	Q1KMD3	HNRL2_HUMAN	HNRNPUL2	Heterogeneous nuclear ribonucleoprotein U-like protein 2			9	1.2492673E7	MS/MS	STY:79.9663@EEDEPEERS(0.9387)GDET(0.0307)PGS(0.0307)EVPGDK;
EEDESDDDNM	EEDES[79.9663]DDDNM	K	-	246	255	10	2	5S(79.9663)	sp|P25788|PSA3_HUMAN	P25788	PSA3_HUMAN	PSMA3	Proteasome subunit alpha type-3			3	4591820	MS/MS	STY:79.9663@EEDES(1.0000)DDDNM;
EEDGADASEEDLTR	EEDGADAS[79.9663]EEDLTR	R	A	231	244	14	2	8S(79.9663)	sp|Q86X53|ERIC1_HUMAN	Q86X53	ERIC1_HUMAN	ERICH1	Glutamate-rich protein 1			1	550572	MS/MS	STY:79.9663@EEDGADAS(0.5000)EEDLT(0.5000)R;
EEDGSLSLDGADSTGVVAK	EEDGS[79.9663]LSLDGADSTGVVAK	K	L	677	695	19	2	5S(79.9663)	sp|Q13263|TIF1B_HUMAN	Q13263	TIF1B_HUMAN	TRIM28	Transcription intermediary factor 1-beta			1	0	MS/MS	STY:79.9663@EEDGS(0.8789)LS(0.0232)LDGADS(0.0489)T(0.0489)GVVAK;
EEEEGISQESSEEEQ	EEEEGISQES[79.9663]SEEEQ	K	-	93	107	15	2	10S(79.9663)	sp|P17096|HMGA1_HUMAN	P17096	HMGA1_HUMAN	HMGA1	High mobility group protein HMG-I/HMG-Y			1	3.4719e+06	MS/MS	STY:79.9663@EEEEGIS(0.1911)QES(0.4044)S(0.4044)EEEQ;
EEEEGISQESSEEEQ	EEEEGISQES[79.9663]S[79.9663]EEEQ	K	-	93	107	15	2	10S(79.9663),11S(79.9663)	sp|P17096|HMGA1_HUMAN	P17096	HMGA1_HUMAN	HMGA1	High mobility group protein HMG-I/HMG-Y			6	2.703745E7	MS/MS	STY:79.9663@EEEEGIS(0.1061)QES(0.9469)S(0.9469)EEEQ;
EEEEGISQESSEEEQ	EEEEGIS[79.9663]QESSEEEQ	K	-	93	107	15	2	7S(79.9663)	sp|P17096|HMGA1_HUMAN	P17096	HMGA1_HUMAN	HMGA1	High mobility group protein HMG-I/HMG-Y			2	3.4719e+06	MS/MS	STY:79.9663@EEEEGIS(0.5327)QES(0.2337)S(0.2337)EEEQ;
EEEEGISQESSEEEQ	EEEEGIS[79.9663]QES[79.9663]SEEEQ	K	-	93	107	15	2	10S(79.9663),7S(79.9663)	sp|P17096|HMGA1_HUMAN	P17096	HMGA1_HUMAN	HMGA1	High mobility group protein HMG-I/HMG-Y			9	2.703745E7	MS/MS	STY:79.9663@EEEEGIS(0.6849)QES(0.6575)S(0.6575)EEEQ;
EEEEKESDSDSEGPIQYRDEEDEDESYQSALANK	EEEEKESDSDSEGPIQY[79.9663]RDEEDEDES[79.9663]YQSALANK	R	V	508	541	34	3	17Y(79.9663),26S(79.9663)	sp|Q8IZ21|PHAR4_HUMAN	Q8IZ21	PHAR4_HUMAN	PHACTR4	Phosphatase and actin regulator 4			1	0	MS/MS	STY:79.9663@EEEEKES(0.0379)DS(0.0379)DS(0.0379)EGPIQY(0.4715)RDEEDEDES(0.4715)Y(0.4715)QS(0.4715)ALANK;
EEETSIDVAGKPNEVTK	EEETSIDVAGKPNEVT[79.9663]K	K	A	463	479	17	2	16T(79.9663)	sp|P53985|MOT1_HUMAN	P53985	MOT1_HUMAN	SLC16A1	Monocarboxylate transporter 1			3	1.111e+06	MS/MS	STY:79.9663@EEET(0.0304)S(0.0304)IDVAGKPNEVT(0.9393)K;
EEETSIDVAGK	EEET[79.9663]SIDVAGK	K	P	463	473	11	2	4T(79.9663)	sp|P53985|MOT1_HUMAN	P53985	MOT1_HUMAN	SLC16A1	Monocarboxylate transporter 1			2	365787	MS/MS	STY:79.9663@EEET(0.5000)S(0.5000)IDVAGK;
EEETSIDVAGKPNEVTK	EEET[79.9663]SIDVAGKPNEVTK	K	A	463	479	17	2	4T(79.9663)	sp|P53985|MOT1_HUMAN	P53985	MOT1_HUMAN	SLC16A1	Monocarboxylate transporter 1			5	1.111e+06	MS/MS	STY:79.9663@EEET(0.8866)S(0.0863)IDVAGKPNEVT(0.0271)K;
EEGELEDGEISDDDNNSQIR	EEGELEDGEIS[79.9663]DDDNNSQIR	K	S	18	37	20	3	11S(79.9663)	sp|O60293|ZC3H1_HUMAN	O60293	ZC3H1_HUMAN	ZFC3H1	Zinc finger C3H1 domain-containing protein			1	0	MS/MS	STY:79.9663@EEGELEDGEIS(0.5000)DDDNNS(0.5000)QIR;
EEGPPPPSPDGASSDAEPEPPSGR	EEGPPPPSPDGASS[79.9663]DAEPEPPSGR	R	T	15	38	24	3	14S(79.9663)	sp|Q9NTJ3|SMC4_HUMAN	Q9NTJ3	SMC4_HUMAN	SMC4	Structural maintenance of chromosomes protein 4			1	1068071	MS/MS	STY:79.9663@EEGPPPPS(0.0640)PDGAS(0.2152)S(0.7032)DAEPEPPS(0.0176)GR;
EEGPPPPSPDGASSDAEPEPPSGR	EEGPPPPSPDGAS[79.9663]SDAEPEPPSGR	R	T	15	38	24	3	13S(79.9663)	sp|Q9NTJ3|SMC4_HUMAN	Q9NTJ3	SMC4_HUMAN	SMC4	Structural maintenance of chromosomes protein 4			2	1.55983e+06	MS/MS	STY:79.9663@EEGPPPPS(0.0291)PDGAS(0.3236)S(0.3236)DAEPEPPS(0.3236)GR;
EEGPPPPSPDGASSDAEPEPPSGR	EEGPPPPS[79.9663]PDGASSDAEPEPPSGR	R	T	15	38	24	3	8S(79.9663)	sp|Q9NTJ3|SMC4_HUMAN	Q9NTJ3	SMC4_HUMAN	SMC4	Structural maintenance of chromosomes protein 4			2	1.55983e+06	MS/MS	STY:79.9663@EEGPPPPS(0.3273)PDGAS(0.3273)S(0.3273)DAEPEPPS(0.0180)GR;
EEGPPPPSPDGASSDAEPEPPSGR	EEGPPPPS[79.9663]PDGASSDAEPEPPS[79.9663]GR	R	T	15	38	24	3	22S(79.9663),8S(79.9663)	sp|Q9NTJ3|SMC4_HUMAN	Q9NTJ3	SMC4_HUMAN	SMC4	Structural maintenance of chromosomes protein 4			1	552158	MS/MS	STY:79.9663@EEGPPPPS(0.4906)PDGAS(0.4906)S(0.4906)DAEPEPPS(0.5281)GR;
EEGPPPPSPDGASSDAEPEPPSGR	EEGPPPPS[79.9663]PDGAS[79.9663]SDAEPEPPSGR	R	T	15	38	24	3	13S(79.9663),8S(79.9663)	sp|Q9NTJ3|SMC4_HUMAN	Q9NTJ3	SMC4_HUMAN	SMC4	Structural maintenance of chromosomes protein 4			2	552158	MS/MS	STY:79.9663@EEGPPPPS(0.6486)PDGAS(0.6486)S(0.6486)DAEPEPPS(0.0541)GR;
EEGSLSDTEADAVSGQLPDPTTNPSAGK	EEGSLSDTEADAVS[79.9663]GQLPDPTTNPSAGK	K	D	515	542	28	3	14S(79.9663)	sp|Q8N1G4|LRC47_HUMAN	Q8N1G4	LRC47_HUMAN	LRRC47	Leucine-rich repeat-containing protein 47			1	1.2006762E7	MS/MS	STY:79.9663@EEGS(0.0202)LS(0.0116)DT(0.0116)EADAVS(0.9282)GQLPDPT(0.0095)T(0.0095)NPS(0.0095)AGK;
EEGSLSDTEADAVSGQLPDPTTNPSAGK	EEGSLS[79.9663]DTEADAVSGQLPDPTTNPSAGK	K	D	515	542	28	3	6S(79.9663)	sp|Q8N1G4|LRC47_HUMAN	Q8N1G4	LRC47_HUMAN	LRRC47	Leucine-rich repeat-containing protein 47			1	1.2006762E7	MS/MS	STY:79.9663@EEGS(0.0073)LS(0.4755)DT(0.4755)EADAVS(0.0072)GQLPDPT(0.0071)T(0.0154)NPS(0.0120)AGK;
EEGSLSDTEADAVSGQLPDPTTNPSAGK	EEGS[79.9663]LSDTEADAVSGQLPDPTTNPSAGK	K	D	515	542	28	3	4S(79.9663)	sp|Q8N1G4|LRC47_HUMAN	Q8N1G4	LRC47_HUMAN	LRRC47	Leucine-rich repeat-containing protein 47			3	1.2006762E7	MS/MS	STY:79.9663@EEGS(0.5474)LS(0.2127)DT(0.2127)EADAVS(0.0070)GQLPDPT(0.0067)T(0.0067)NPS(0.0067)AGK;
EELEQQTDGDCEEDEEEENDGETPK	EELEQQTDGDC[57.0215]EEDEEEENDGET[79.9663]PK	K	S	369	393	25	3	11C(57.0215),23T(79.9663)	sp|Q99442|SEC62_HUMAN	Q99442	SEC62_HUMAN	SEC62	Translocation protein SEC62			4	1.689911E7	MS/MS	STY:79.9663@EELEQQT(0.1662)DGDCEEDEEEENDGET(0.8338)PK;
EELEQQTDGDCEEDEEEENDGETPK	EELEQQT[79.9663]DGDC[57.0215]EEDEEEENDGETPK	K	S	369	393	25	3	11C(57.0215),7T(79.9663)	sp|Q99442|SEC62_HUMAN	Q99442	SEC62_HUMAN	SEC62	Translocation protein SEC62			4	1.689911E7	MS/MS	STY:79.9663@EELEQQT(0.9352)DGDCEEDEEEENDGET(0.0648)PK;
EELMSSDLEETAGSTSIPK	EELMSSDLEETAGS[79.9663]TSIPK	K	R	515	533	19	2	14S(79.9663)	sp|O00567|NOP56_HUMAN	O00567	NOP56_HUMAN	NOP56	Nucleolar protein 56			1	0	MS/MS	STY:79.9663@EELMS(0.0150)S(0.0150)DLEET(0.0483)AGS(0.3072)T(0.3072)S(0.3072)IPK;
EELMSSDLEETAGSTSIPK	EELMSSDLEET[79.9663]AGSTSIPK	K	R	515	533	19	2,3	11T(79.9663)	sp|O00567|NOP56_HUMAN	O00567	NOP56_HUMAN	NOP56	Nucleolar protein 56			3	2.4405842E7	MS/MS	STY:79.9663@EELMS(0.0048)S(0.0048)DLEET(0.2476)AGS(0.2476)T(0.2476)S(0.2476)IPK;
EELMSSDLEETAGSTSIPK	EELMSS[79.9663]DLEETAGSTSIPK	K	R	515	533	19	2	6S(79.9663)	sp|O00567|NOP56_HUMAN	O00567	NOP56_HUMAN	NOP56	Nucleolar protein 56			1	2.2361986E7	MS/MS	STY:79.9663@EELMS(0.0245)S(0.6319)DLEET(0.0137)AGS(0.0085)T(0.1607)S(0.1607)IPK;
EELMSSDLEETAGSTSIPK	EELMS[79.9663]SDLEETAGSTSIPK	K	R	515	533	19	2,3	5S(79.9663)	sp|O00567|NOP56_HUMAN	O00567	NOP56_HUMAN	NOP56	Nucleolar protein 56			8	2.8976512E7	MS/MS	STY:79.9663@EELMS(0.5855)S(0.3604)DLEET(0.0156)AGS(0.0128)T(0.0128)S(0.0128)IPK;
EELMSSDLEETAGSTSIPK	EELMS[79.9663]S[79.9663]DLEETAGSTSIPK	K	R	515	533	19	2	5S(79.9663),6S(79.9663)	sp|O00567|NOP56_HUMAN	O00567	NOP56_HUMAN	NOP56	Nucleolar protein 56			1	0	MS/MS	STY:79.9663@EELMS(0.3833)S(0.3833)DLEET(0.3833)AGS(0.2903)T(0.2903)S(0.2695)IPK;
EELMSSDLEETAGSTSIPK	EELM[15.9949]SSDLEET[79.9663]AGSTSIPK	K	R	515	533	19	2	11T(79.9663),4M(15.9949)	sp|O00567|NOP56_HUMAN	O00567	NOP56_HUMAN	NOP56	Nucleolar protein 56			1	2.42782e+06	MS/MS	STY:79.9663@EELMS(0.0378)S(0.0378)DLEET(0.2311)AGS(0.2311)T(0.2311)S(0.2311)IPK;M:15.9949@EELM(1.0000)SSDLEETAGSTSIPK;
EELMSSDLEETAGSTSIPK	EELM[15.9949]SS[79.9663]DLEETAGSTSIPK	K	R	515	533	19	3	4M(15.9949),6S(79.9663)	sp|O00567|NOP56_HUMAN	O00567	NOP56_HUMAN	NOP56	Nucleolar protein 56			1	845318	MS/MS	STY:79.9663@EELMS(0.0149)S(0.9342)DLEET(0.0157)AGS(0.0117)T(0.0117)S(0.0117)IPK;M:15.9949@EELM(1.0000)SSDLEETAGSTSIPK;
EELMSSDLEETAGSTSIPK	EELM[15.9949]S[79.9663]SDLEETAGSTSIPK	K	R	515	533	19	2	4M(15.9949),5S(79.9663)	sp|O00567|NOP56_HUMAN	O00567	NOP56_HUMAN	NOP56	Nucleolar protein 56			2	2.42782e+06	MS/MS	STY:79.9663@EELMS(0.4793)S(0.4793)DLEET(0.0082)AGS(0.0082)T(0.0082)S(0.0167)IPK;M:15.9949@EELM(1.0000)SSDLEETAGSTSIPK;
EENPESDGEPVVEDGTSVK	EENPESDGEPVVEDGT[79.9663]SVK	K	T	261	279	19	2	16T(79.9663)	sp|Q13439|GOGA4_HUMAN	Q13439	GOGA4_HUMAN	GOLGA4	Golgin subfamily A member 4			1	2.51467e+06	MS/MS	STY:79.9663@EENPES(0.0439)DGEPVVEDGT(0.4780)S(0.4780)VK;
EENPESDGEPVVEDGTSVK	EENPES[79.9663]DGEPVVEDGTSVK	K	T	261	279	19	2	6S(79.9663)	sp|Q13439|GOGA4_HUMAN	Q13439	GOGA4_HUMAN	GOLGA4	Golgin subfamily A member 4			1	2.51467e+06	MS/MS	STY:79.9663@EENPES(0.9384)DGEPVVEDGT(0.0308)S(0.0308)VK;
EEPAAAGSGAASPSAAEK	EEPAAAGSGAAS[79.9663]PSAAEK	K	G	70	87	18	2	12S(79.9663)	sp|P29966|MARCS_HUMAN	P29966	MARCS_HUMAN	MARCKS	Myristoylated alanine-rich C-kinase substrate			2	3061974	MS/MS	STY:79.9663@EEPAAAGS(0.0185)GAAS(0.4907)PS(0.4907)AAEK;
EEPAAAGSGAASPSAAEK	EEPAAAGS[79.9663]GAASPSAAEK	K	G	70	87	18	2	8S(79.9663)	sp|P29966|MARCS_HUMAN	P29966	MARCS_HUMAN	MARCKS	Myristoylated alanine-rich C-kinase substrate			1	697333	MS/MS	STY:79.9663@EEPAAAGS(0.9001)GAAS(0.0524)PS(0.0475)AAEK;
EEPLSEEEPCTSTAIASPEK	EEPLSEEEPC[57.0215]T[79.9663]STAIASPEK	K	K	498	517	20	3	10C(57.0215),11T(79.9663)	sp|Q9Y2X3|NOP58_HUMAN	Q9Y2X3	NOP58_HUMAN	NOP58	Nucleolar protein 58			2	6278211	MS/MS	STY:79.9663@EEPLS(0.0176)EEEPCT(0.9379)S(0.0149)T(0.0149)AIAS(0.0148)PEK;
EEPLSEEEPCTSTAIASPEK	EEPLSEEEPC[57.0215]T[79.9663]S[79.9663]TAIASPEK	K	K	498	517	20	3	10C(57.0215),11T(79.9663),12S(79.9663)	sp|Q9Y2X3|NOP58_HUMAN	Q9Y2X3	NOP58_HUMAN	NOP58	Nucleolar protein 58			1	3.0784e+06	MS/MS	STY:79.9663@EEPLS(0.0747)EEEPCT(0.4813)S(0.4813)T(0.4813)AIAS(0.4813)PEK;
EEPLSEEEPCTSTAIASPEK	EEPLS[79.9663]EEEPC[57.0215]TSTAIASPEK	K	K	498	517	20	2,3	10C(57.0215),5S(79.9663)	sp|Q9Y2X3|NOP58_HUMAN	Q9Y2X3	NOP58_HUMAN	NOP58	Nucleolar protein 58			9	9677945	MS/MS	STY:79.9663@EEPLS(0.9423)EEEPCT(0.0144)S(0.0144)T(0.0144)AIAS(0.0144)PEK;
EEPLSEEEPCTSTAIASPEK	EEPLS[79.9663]EEEPC[57.0215]TSTAIAS[79.9663]PEK	K	K	498	517	20	2,3	10C(57.0215),17S(79.9663),5S(79.9663)	sp|Q9Y2X3|NOP58_HUMAN	Q9Y2X3	NOP58_HUMAN	NOP58	Nucleolar protein 58			3	4.7926e+06	MS/MS	STY:79.9663@EEPLS(0.7850)EEEPCT(0.2035)S(0.2035)T(0.0313)AIAS(0.7766)PEK;
EEPLSEEEPCTSTAIASPEKK	EEPLS[79.9663]EEEPC[57.0215]TSTAIAS[79.9663]PEKK	K	K	498	518	21	3	10C(57.0215),17S(79.9663),5S(79.9663)	sp|Q9Y2X3|NOP58_HUMAN	Q9Y2X3	NOP58_HUMAN	NOP58	Nucleolar protein 58			2	3.74903e+06	MS/MS	STY:79.9663@EEPLS(0.9241)EEEPCT(0.0357)S(0.0589)T(0.0589)AIAS(0.9223)PEKK;
EEPLSEEEPCTSTAIASPEK	EEPLS[79.9663]EEEPC[57.0215]T[79.9663]STAIASPEK	K	K	498	517	20	2	10C(57.0215),11T(79.9663),5S(79.9663)	sp|Q9Y2X3|NOP58_HUMAN	Q9Y2X3	NOP58_HUMAN	NOP58	Nucleolar protein 58			2	1.7142e+06	MS/MS	STY:79.9663@EEPLS(0.4000)EEEPCT(0.4000)S(0.4000)T(0.4000)AIAS(0.4000)PEK;
EEPLSEEEPCTSTAIASPEKK	EEPLS[79.9663]EEEPC[57.0215]T[79.9663]STAIASPEKK	K	K	498	518	21	3	10C(57.0215),11T(79.9663),5S(79.9663)	sp|Q9Y2X3|NOP58_HUMAN	Q9Y2X3	NOP58_HUMAN	NOP58	Nucleolar protein 58			2	3.74903e+06	MS/MS	STY:79.9663@EEPLS(0.4391)EEEPCT(0.3902)S(0.3902)T(0.3902)AIAS(0.3902)PEKK;
EEPSQNDISPK	EEPSQNDIS[79.9663]PK	K	T	81	91	11	2	9S(79.9663)	sp|Q9NR30|DDX21_HUMAN	Q9NR30	DDX21_HUMAN	DDX21	Nucleolar RNA helicase 2			3	4265544	MS/MS	STY:79.9663@EEPS(0.0554)QNDIS(0.9446)PK;
EEPSQNDISPK	EEPS[79.9663]QNDISPK	K	T	81	91	11	2	4S(79.9663)	sp|Q9NR30|DDX21_HUMAN	Q9NR30	DDX21_HUMAN	DDX21	Nucleolar RNA helicase 2			5	4265544	MS/MS	STY:79.9663@EEPS(0.6845)QNDIS(0.3155)PK;
EESDGEYDEFGR	EESDGEY[79.9663]DEFGR	R	K	118	129	12	2	7Y(79.9663)	sp|O95218|ZRAB2_HUMAN	O95218	ZRAB2_HUMAN	ZRANB2	Zinc finger Ran-binding domain-containing protein 2			1	1.74691e+06	MS/MS	STY:79.9663@EES(0.4889)DGEY(0.5111)DEFGR;
EESLVEELSPASEK	EESLVEELS[79.9663]PASEK	R	K	418	431	14	2	9S(79.9663)	sp|Q9BXK5|B2L13_HUMAN	Q9BXK5	B2L13_HUMAN	BCL2L13	Bcl-2-like protein 13			2	867455	MS/MS	STY:79.9663@EES(0.0284)LVEELS(0.9100)PAS(0.0617)EK;
EESSELEQPFAQDTSSVGPDR	EESSELEQPFAQDT[79.9663]SSVGPDR	K	K	231	251	21	3	14T(79.9663)	sp|Q14151|SAFB2_HUMAN	Q14151	SAFB2_HUMAN	SAFB2	Scaffold attachment factor B2	SAFB	sp|Q15424|SAFB1_HUMAN	2	909409	MS/MS	STY:79.9663@EES(0.0096)S(0.0096)ELEQPFAQDT(0.4752)S(0.4752)S(0.0304)VGPDR;
EESAEELQAAEHPDEVEDPK	EES[79.9663]AEELQAAEHPDEVEDPK	K	N	145	164	20	2,3	3S(79.9663)	sp|O00193|SMAP_HUMAN	O00193	SMAP_HUMAN	SMAP	Small acidic protein			7	3.51673e+06	MS/MS	STY:79.9663@EES(1.0000)AEELQAAEHPDEVEDPK;
EESDDEAAVEEEEEEK	EES[79.9663]DDEAAVEEEEEEK	K	K	304	319	16	2	3S(79.9663)	sp|P14625|ENPL_HUMAN	P14625	ENPL_HUMAN	HSP90B1	Endoplasmin			6	4155530	MS/MS	STY:79.9663@EES(1.0000)DDEAAVEEEEEEK;
EESDGEYDEFGR	EES[79.9663]DGEYDEFGR	R	K	118	129	12	2	3S(79.9663)	sp|O95218|ZRAB2_HUMAN	O95218	ZRAB2_HUMAN	ZRANB2	Zinc finger Ran-binding domain-containing protein 2			2	1.74691e+06	MS/MS	STY:79.9663@EES(0.9446)DGEY(0.0554)DEFGR;
EESEEEEDEDDEEEEEEEK	EES[79.9663]EEEEDEDDEEEEEEEK	R	E	30	48	19	2,3	3S(79.9663)	sp|P35659|DEK_HUMAN	P35659	DEK_HUMAN	DEK	Protein DEK			10	1.3418969E7	MS/MS	STY:79.9663@EES(1.0000)EEEEDEDDEEEEEEEK;
EESEESDEDMGFGLFD	EES[79.9663]EESDEDMGFGLFD	K	-	302	317	16	2	3S(79.9663)	sp|P05388|RLA0_HUMAN	P05388	RLA0_HUMAN	RPLP0	Large ribosomal subunit protein uL10	RPLP0P6	sp|Q8NHW5|RLA0L_HUMAN	4	3.15033e+06	MS/MS	STY:79.9663@EES(0.5000)EES(0.5000)DEDMGFGLFD;
EESEESEAEPVQR	EES[79.9663]EESEAEPVQR	R	T	194	206	13	2	3S(79.9663)	sp|Q9BW71|HIRP3_HUMAN	Q9BW71	HIRP3_HUMAN	HIRIP3	HIRA-interacting protein 3			1	0	MS/MS	STY:79.9663@EES(0.9394)EES(0.0606)EAEPVQR;
EESEESEAEPVQR	EES[79.9663]EES[79.9663]EAEPVQR	R	T	194	206	13	2	3S(79.9663),6S(79.9663)	sp|Q9BW71|HIRP3_HUMAN	Q9BW71	HIRP3_HUMAN	HIRIP3	HIRA-interacting protein 3			1	368565	MS/MS	STY:79.9663@EES(1.0000)EES(1.0000)EAEPVQR;
EESSELEQPFAQDTSSVGPDR	EES[79.9663]SELEQPFAQDTSSVGPDR	K	K	231	251	21	3	3S(79.9663)	sp|Q14151|SAFB2_HUMAN	Q14151	SAFB2_HUMAN	SAFB2	Scaffold attachment factor B2	SAFB	sp|Q15424|SAFB1_HUMAN	1	360182	MS/MS	STY:79.9663@EES(0.4284)S(0.4284)ELEQPFAQDT(0.0478)S(0.0478)S(0.0478)VGPDR;
EESSSSDEDDR	EES[79.9663]S[79.9663]S[79.9663]SDEDDR	R	G	331	341	11	2	3S(79.9663),4S(79.9663),5S(79.9663)	sp|Q9P0J7|KCMF1_HUMAN	Q9P0J7	KCMF1_HUMAN	KCMF1	E3 ubiquitin-protein ligase KCMF1			1	0	MS/MS	STY:79.9663@EES(0.7500)S(0.7500)S(0.7500)S(0.7500)DEDDR;
EETPPPVEPEEEEDTEDAGLDDWEAMASDEETEK	EETPPPVEPEEEEDTEDAGLDDWEAMAS[79.9663]DEETEK	K	V	484	517	34	3	28S(79.9663)	sp|O60841|IF2P_HUMAN	O60841	IF2P_HUMAN	EIF5B	Eukaryotic translation initiation factor 5B			1	8055582	MS/MS	STY:79.9663@EET(0.0586)PPPVEPEEEEDT(0.0345)EDAGLDDWEAMAS(0.8869)DEET(0.0200)EK;
EEVVGGDDSDGLR	EEVVGGDDS[79.9663]DGLR	R	A	110	122	13	2	9S(79.9663)	sp|P25490|TYY1_HUMAN	P25490	TYY1_HUMAN	YY1	Transcriptional repressor protein YY1			1	857822	MS/MS	STY:79.9663@EEVVGGDDS(1.0000)DGLR;
EFDELNPSAQR	EFDELNPS[79.9663]AQR	R	D	656	666	11	2	8S(79.9663)	sp|P16615|AT2A2_HUMAN	P16615	AT2A2_HUMAN	ATP2A2	Sarcoplasmic/endoplasmic reticulum calcium ATPase 2			1	0	MS/MS	STY:79.9663@EFDELNPS(1.0000)AQR;
EFITGDVEPTDAESEWHSENEEEEK	EFITGDVEPTDAESEWHS[79.9663]ENEEEEK	R	L	108	132	25	3	18S(79.9663)	sp|Q99733|NP1L4_HUMAN	Q99733	NP1L4_HUMAN	NAP1L4	Nucleosome assembly protein 1-like 4			3	1.0984912E7	MS/MS	STY:79.9663@EFIT(0.0330)GDVEPT(0.0330)DAES(0.0315)EWHS(0.9025)ENEEEEK;
EFITGDVEPTDAESEWHSENEEEEK	EFITGDVEPTDAES[79.9663]EWHSENEEEEK	R	L	108	132	25	3	14S(79.9663)	sp|Q99733|NP1L4_HUMAN	Q99733	NP1L4_HUMAN	NAP1L4	Nucleosome assembly protein 1-like 4			3	1.0984912E7	MS/MS	STY:79.9663@EFIT(0.0517)GDVEPT(0.3291)DAES(0.6045)EWHS(0.0147)ENEEEEK;
EFITGDVEPTDAESEWHSENEEEEK	EFIT[79.9663]GDVEPTDAESEWHSENEEEEK	R	L	108	132	25	3	4T(79.9663)	sp|Q99733|NP1L4_HUMAN	Q99733	NP1L4_HUMAN	NAP1L4	Nucleosome assembly protein 1-like 4			2	1.0984912E7	MS/MS	STY:79.9663@EFIT(0.6152)GDVEPT(0.1483)DAES(0.1483)EWHS(0.0882)ENEEEEK;
EFTGSPPSSATK	EFTGSPPSS[79.9663]ATK	R	K	550	561	12	2	9S(79.9663)	sp|Q92609|TBCD5_HUMAN	Q92609	TBCD5_HUMAN	TBC1D5	TBC1 domain family member 5			1	615773	MS/MS	STY:79.9663@EFT(0.0107)GS(0.0107)PPS(0.0107)S(0.4839)AT(0.4839)K;
EGAASPAPETPQPTSPETSPK	EGAASPAPETPQPTS[79.9663]PETSPK	K	E	372	392	21	3	15S(79.9663)	sp|Q9Y3X0|CCDC9_HUMAN	Q9Y3X0	CCDC9_HUMAN	CCDC9	Coiled-coil domain-containing protein 9			1	876205	MS/MS	STY:79.9663@EGAAS(0.0910)PAPET(0.0910)PQPT(0.0910)S(0.2423)PET(0.2423)S(0.2423)PK;
EGAASPAPETPQPTSPETSPK	EGAASPAPETPQPT[79.9663]SPETSPK	K	E	372	392	21	3	14T(79.9663)	sp|Q9Y3X0|CCDC9_HUMAN	Q9Y3X0	CCDC9_HUMAN	CCDC9	Coiled-coil domain-containing protein 9			2	876205	MS/MS	STY:79.9663@EGAAS(0.0270)PAPET(0.0313)PQPT(0.3105)S(0.3105)PET(0.3105)S(0.0100)PK;
EGASPVTEVR	EGASPVT[79.9663]EVR	R	I	419	428	10	2	7T(79.9663)	sp|Q9ULJ3|ZBT21_HUMAN	Q9ULJ3	ZBT21_HUMAN	ZBTB21	Zinc finger and BTB domain-containing protein 21			1	254104	MS/MS	STY:79.9663@EGAS(0.3103)PVT(0.6897)EVR;
EGDPVSLSTPLETEFGSPSELSPR	EGDPVSLSTPLETEFGSPSELS[79.9663]PR	R	I	69	92	24	3	22S(79.9663)	sp|Q9BUR4|TCAB1_HUMAN	Q9BUR4	TCAB1_HUMAN	WRAP53	Telomerase Cajal body protein 1			1	0	MS/MS	STY:79.9663@EGDPVS(0.0341)LS(0.0341)T(0.0341)PLET(0.0124)EFGS(0.0088)PS(0.0172)ELS(0.8592)PR;
EGEDGDQPTTPPKPLK	EGEDGDQPT[79.9663]TPPKPLK	K	T	174	189	16	3	9T(79.9663)	sp|P18858|DNLI1_HUMAN	P18858	DNLI1_HUMAN	LIG1	DNA ligase 1			3	1.08991e+06	MS/MS	STY:79.9663@EGEDGDQPT(0.5000)T(0.5000)PPKPLK;
EGEEPTVYSDEEEPKDESAR	EGEEPTVYSDEEEPKDES[79.9663]AR	K	K	173	192	20	2,3	18S(79.9663)	sp|O00264|PGRC1_HUMAN	O00264	PGRC1_HUMAN	PGRMC1	Membrane-associated progesterone receptor component 1			4	8564922	MS/MS	STY:79.9663@EGEEPT(0.0286)VY(0.0286)S(0.0286)DEEEPKDES(0.9142)AR;
EGEEPTVYSDEEEPK	EGEEPTVYS[79.9663]DEEEPK	K	D	173	187	15	2	9S(79.9663)	sp|O00264|PGRC1_HUMAN	O00264	PGRC1_HUMAN	PGRMC1	Membrane-associated progesterone receptor component 1			1	1.07520592E8	MS/MS	STY:79.9663@EGEEPT(0.2854)VY(0.2854)S(0.4292)DEEEPK;
EGEEPTVYSDEEEPKDESAR	EGEEPTVYS[79.9663]DEEEPKDESAR	K	K	173	192	20	3	9S(79.9663)	sp|O00264|PGRC1_HUMAN	O00264	PGRC1_HUMAN	PGRMC1	Membrane-associated progesterone receptor component 1			2	6595436	MS/MS	STY:79.9663@EGEEPT(0.0210)VY(0.0210)S(0.8996)DEEEPKDES(0.0583)AR;
EGEEPTVYSDEEEPK	EGEEPTVY[79.9663]SDEEEPK	K	D	173	187	15	2	8Y(79.9663)	sp|O00264|PGRC1_HUMAN	O00264	PGRC1_HUMAN	PGRMC1	Membrane-associated progesterone receptor component 1			5	1.0745112E8	MS/MS	STY:79.9663@EGEEPT(0.0183)VY(0.4908)S(0.4908)DEEEPK;
EGEEPTVYSDEEEPKDESAR	EGEEPTVY[79.9663]SDEEEPKDESAR	K	K	173	192	20	2,3	8Y(79.9663)	sp|O00264|PGRC1_HUMAN	O00264	PGRC1_HUMAN	PGRMC1	Membrane-associated progesterone receptor component 1			3	8.25938e+06	MS/MS	STY:79.9663@EGEEPT(0.0170)VY(0.4845)S(0.4845)DEEEPKDES(0.0139)AR;
EGEEPTVYSDEEEPK	EGEEPT[79.9663]VYSDEEEPK	K	D	173	187	15	2	6T(79.9663)	sp|O00264|PGRC1_HUMAN	O00264	PGRC1_HUMAN	PGRMC1	Membrane-associated progesterone receptor component 1			8	1.12042776E8	MS/MS	STY:79.9663@EGEEPT(0.6889)VY(0.1556)S(0.1556)DEEEPK;
EGEEPTVYSDEEEPKDESAR	EGEEPT[79.9663]VYSDEEEPKDESAR	K	K	173	192	20	2,3	6T(79.9663)	sp|O00264|PGRC1_HUMAN	O00264	PGRC1_HUMAN	PGRMC1	Membrane-associated progesterone receptor component 1			15	8759994	MS/MS	STY:79.9663@EGEEPT(0.9057)VY(0.0343)S(0.0343)DEEEPKDES(0.0256)AR;
EGEETEGSEEDDK	EGEETEGS[79.9663]EEDDK	K	E	473	485	13	2	8S(79.9663)	sp|P49321|NASP_HUMAN	P49321	NASP_HUMAN	NASP	Nuclear autoantigenic sperm protein			1	748686	MS/MS	STY:79.9663@EGEET(0.0732)EGS(0.9268)EEDDK;
EGEETEGSEEDDK	EGEET[79.9663]EGSEEDDK	K	E	473	485	13	2	5T(79.9663)	sp|P49321|NASP_HUMAN	P49321	NASP_HUMAN	NASP	Nuclear autoantigenic sperm protein			1	748686	MS/MS	STY:79.9663@EGEET(0.5000)EGS(0.5000)EEDDK;
EGESPAAGPPPQELVEEEPSAPPTLLEEETEDGSDK	EGESPAAGPPPQELVEEEPSAPPTLLEEET[79.9663]EDGSDK	R	V	1040	1075	36	3	30T(79.9663)	sp|Q8IZL8|PELP1_HUMAN	Q8IZL8	PELP1_HUMAN	PELP1	Proline-, glutamic acid- and leucine-rich protein 1			1	7.59383e+06	MS/MS	STY:79.9663@EGES(0.0974)PAAGPPPQELVEEEPS(0.1812)APPT(0.1812)LLEEET(0.2702)EDGS(0.2702)DK;
EGESPAAGPPPQELVEEEPSAPPTLLEEETEDGSDK	EGESPAAGPPPQELVEEEPSAPPT[79.9663]LLEEETEDGSDK	R	V	1040	1075	36	3	24T(79.9663)	sp|Q8IZL8|PELP1_HUMAN	Q8IZL8	PELP1_HUMAN	PELP1	Proline-, glutamic acid- and leucine-rich protein 1			1	7.59383e+06	MS/MS	STY:79.9663@EGES(0.0100)PAAGPPPQELVEEEPS(0.0089)APPT(0.4298)LLEEET(0.4133)EDGS(0.1380)DK;
EGESPAAGPPPQELVEEEPSAPPTLLEEETEDGSDK	EGES[79.9663]PAAGPPPQELVEEEPSAPPTLLEEETEDGSDK	R	V	1040	1075	36	3	4S(79.9663)	sp|Q8IZL8|PELP1_HUMAN	Q8IZL8	PELP1_HUMAN	PELP1	Proline-, glutamic acid- and leucine-rich protein 1			2	7.59383e+06	MS/MS	STY:79.9663@EGES(0.4905)PAAGPPPQELVEEEPS(0.0145)APPT(0.3931)LLEEET(0.0678)EDGS(0.0341)DK;
EGHSLEMENENLVENGADSDEDDNSFLK	EGHSLEMENENLVENGADSDEDDNS[79.9663]FLK	K	Q	668	695	28	3	25S(79.9663)	sp|Q9UHB6|LIMA1_HUMAN	Q9UHB6	LIMA1_HUMAN	LIMA1	LIM domain and actin-binding protein 1			2	1.1054809E7	MS/MS	STY:79.9663@EGHS(0.0315)LEMENENLVENGADS(0.0499)DEDDNS(0.9186)FLK;
EGHSLEMENENLVENGADSDEDDNSFLK	EGHSLEMENENLVENGADS[79.9663]DEDDNSFLK	K	Q	668	695	28	3	19S(79.9663)	sp|Q9UHB6|LIMA1_HUMAN	Q9UHB6	LIMA1_HUMAN	LIMA1	LIM domain and actin-binding protein 1			6	1.1054809E7	MS/MS	STY:79.9663@EGHS(0.0455)LEMENENLVENGADS(0.9250)DEDDNS(0.0294)FLK;
EGHSLEMENENLVENGADSDEDDNSFLK	EGHSLEM[15.9949]ENENLVENGADSDEDDNS[79.9663]FLK	K	Q	668	695	28	3	25S(79.9663),7M(15.9949)	sp|Q9UHB6|LIMA1_HUMAN	Q9UHB6	LIMA1_HUMAN	LIMA1	LIM domain and actin-binding protein 1			4	1.69422e+06	MS/MS	STY:79.9663@EGHS(0.0641)LEMENENLVENGADS(0.0844)DEDDNS(0.8515)FLK;M:15.9949@EGHSLEM(1.0000)ENENLVENGADSDEDDNSFLK;
EGHSLEMENENLVENGADSDEDDNSFLK	EGHS[79.9663]LEMENENLVENGADSDEDDNSFLK	K	Q	668	695	28	3	4S(79.9663)	sp|Q9UHB6|LIMA1_HUMAN	Q9UHB6	LIMA1_HUMAN	LIMA1	LIM domain and actin-binding protein 1			1	0	MS/MS	STY:79.9663@EGHS(0.6254)LEMENENLVENGADS(0.1873)DEDDNS(0.1873)FLK;
EGHSLEMENENLVENGADSDEDDNSFLK	EGHS[79.9663]LEM[15.9949]ENENLVENGADSDEDDNSFLK	K	Q	668	695	28	3	4S(79.9663),7M(15.9949)	sp|Q9UHB6|LIMA1_HUMAN	Q9UHB6	LIMA1_HUMAN	LIMA1	LIM domain and actin-binding protein 1			1	1.19581e+06	MS/MS	STY:79.9663@EGHS(0.8607)LEMENENLVENGADS(0.0697)DEDDNS(0.0697)FLK;M:15.9949@EGHSLEM(1.0000)ENENLVENGADSDEDDNSFLK;
EGITGPPADSSKPIGPDDAIDALSSDFTCGSPTAAGK	EGITGPPADSSKPIGPDDAIDALS[79.9663]SDFTC[57.0215]GSPTAAGK	K	K	213	249	37	3	24S(79.9663),29C(57.0215)	sp|P20810|ICAL_HUMAN	P20810	ICAL_HUMAN	CAST	Calpastatin			1	4.23776e+06	MS/MS	STY:79.9663@EGIT(0.0458)GPPADS(0.0177)S(0.0177)KPIGPDDAIDALS(0.1838)S(0.1838)DFT(0.1838)CGS(0.1838)PT(0.1838)AAGK;
EGLRPGDTTSTFCGTPNYIAPEILR	EGLRPGDT[79.9663]TSTFC[57.0215]GTPNYIAPEILR	K	G	402	426	25	3	13C(57.0215),8T(79.9663)	sp|P41743|KPCI_HUMAN	P41743	KPCI_HUMAN	PRKCI	Protein kinase C iota type			3	0	MS/MS	STY:79.9663@EGLRPGDT(0.3185)T(0.3185)S(0.3185)T(0.0230)FCGT(0.0160)PNY(0.0056)IAPEILR;
EGMNPSYDEYADSDEDQHDAYLER	EGMNPSYDEYADSDEDQHDAY[79.9663]LER	K	M	432	455	24	3	21Y(79.9663)	sp|Q08945|SSRP1_HUMAN	Q08945	SSRP1_HUMAN	SSRP1	FACT complex subunit SSRP1			5	6815905	MS/MS	STY:79.9663@EGMNPS(0.0300)Y(0.0300)DEY(0.0300)ADS(0.0300)DEDQHDAY(0.8799)LER;
EGMNPSYDEYADSDEDQHDAYLER	EGMNPSYDEYADS[79.9663]DEDQHDAYLER	K	M	432	455	24	3	13S(79.9663)	sp|Q08945|SSRP1_HUMAN	Q08945	SSRP1_HUMAN	SSRP1	FACT complex subunit SSRP1			5	6501933	MS/MS	STY:79.9663@EGMNPS(0.0192)Y(0.0192)DEY(0.0192)ADS(0.9280)DEDQHDAY(0.0145)LER;
EGMNPSYDEYADSDEDQHDAYLER	EGMNPSYDEY[79.9663]ADSDEDQHDAYLER	K	M	432	455	24	3	10Y(79.9663)	sp|Q08945|SSRP1_HUMAN	Q08945	SSRP1_HUMAN	SSRP1	FACT complex subunit SSRP1			3	6554689	MS/MS	STY:79.9663@EGMNPS(0.0193)Y(0.0193)DEY(0.9191)ADS(0.0181)DEDQHDAY(0.0242)LER;
EGMNPSYDEYADSDEDQHDAYLER	EGMNPSY[79.9663]DEYADSDEDQHDAYLER	K	M	432	455	24	3	7Y(79.9663)	sp|Q08945|SSRP1_HUMAN	Q08945	SSRP1_HUMAN	SSRP1	FACT complex subunit SSRP1			1	1738812	MS/MS	STY:79.9663@EGMNPS(0.0237)Y(0.5992)DEY(0.0520)ADS(0.0520)DEDQHDAY(0.2730)LER;
EGMNPSYDEYADSDEDQHDAYLER	EGMNPS[79.9663]YDEYADSDEDQHDAYLER	K	M	432	455	24	3	6S(79.9663)	sp|Q08945|SSRP1_HUMAN	Q08945	SSRP1_HUMAN	SSRP1	FACT complex subunit SSRP1			5	6815905	MS/MS	STY:79.9663@EGMNPS(0.2483)Y(0.2483)DEY(0.2483)ADS(0.2483)DEDQHDAY(0.0070)LER;
EGMNPSYDEYADSDEDQHDAYLER	EGM[15.9949]NPSYDEYADS[79.9663]DEDQHDAYLER	K	M	432	455	24	3	13S(79.9663),3M(15.9949)	sp|Q08945|SSRP1_HUMAN	Q08945	SSRP1_HUMAN	SSRP1	FACT complex subunit SSRP1			2	1.25429e+06	MS/MS	STY:79.9663@EGMNPS(0.1379)Y(0.1379)DEY(0.0201)ADS(0.6405)DEDQHDAY(0.0636)LER;M:15.9949@EGM(1.0000)NPSYDEYADSDEDQHDAYLER;
EGMNPSYDEYADSDEDQHDAYLER	EGM[15.9949]NPSYDEY[79.9663]ADSDEDQHDAYLER	K	M	432	455	24	3	10Y(79.9663),3M(15.9949)	sp|Q08945|SSRP1_HUMAN	Q08945	SSRP1_HUMAN	SSRP1	FACT complex subunit SSRP1			1	1.071e+06	MS/MS	STY:79.9663@EGMNPS(0.0249)Y(0.0249)DEY(0.4545)ADS(0.4545)DEDQHDAY(0.0413)LER;M:15.9949@EGM(1.0000)NPSYDEYADSDEDQHDAYLER;
EGMNPSYDEYADSDEDQHDAYLER	EGM[15.9949]NPSY[79.9663]DEYADSDEDQHDAYLER	K	M	432	455	24	3	3M(15.9949),7Y(79.9663)	sp|Q08945|SSRP1_HUMAN	Q08945	SSRP1_HUMAN	SSRP1	FACT complex subunit SSRP1			1	1.071e+06	MS/MS	STY:79.9663@EGMNPS(0.0225)Y(0.3228)DEY(0.3228)ADS(0.3228)DEDQHDAY(0.0090)LER;M:15.9949@EGM(1.0000)NPSYDEYADSDEDQHDAYLER;
EGMNPSYDEYADSDEDQHDAYLER	EGM[15.9949]NPS[79.9663]YDEYADSDEDQHDAYLER	K	M	432	455	24	3	3M(15.9949),6S(79.9663)	sp|Q08945|SSRP1_HUMAN	Q08945	SSRP1_HUMAN	SSRP1	FACT complex subunit SSRP1			2	1.25303e+06	MS/MS	STY:79.9663@EGMNPS(0.2341)Y(0.2341)DEY(0.2341)ADS(0.2341)DEDQHDAY(0.0637)LER;M:15.9949@EGM(1.0000)NPSYDEYADSDEDQHDAYLER;
EGNTTEDDFPSSPGNGNK	EGNTT[79.9663]EDDFPSSPGNGNK	R	S	295	312	18	2	5T(79.9663)	sp|Q15007|FL2D_HUMAN	Q15007	FL2D_HUMAN	WTAP	Pre-mRNA-splicing regulator WTAP			1	1.0438e+06	MS/MS	STY:79.9663@EGNT(0.0174)T(0.3275)EDDFPS(0.3275)S(0.3275)PGNGNK;
EGPEPPEEVPPPTTPPVPK	EGPEPPEEVPPPT[79.9663]TPPVPK	K	V	597	615	19	2	13T(79.9663)	sp|P48634|PRC2A_HUMAN	P48634	PRC2A_HUMAN	PRRC2A	Protein PRRC2A			1	538560	MS/MS	STY:79.9663@EGPEPPEEVPPPT(0.5000)T(0.5000)PPVPK;
EGSQGELTPANSQSR	EGSQGELT[79.9663]PANSQSR	R	M	472	486	15	2	8T(79.9663)	sp|Q13098|CSN1_HUMAN	Q13098	CSN1_HUMAN	GPS1	COP9 signalosome complex subunit 1			1	654742	MS/MS	STY:79.9663@EGS(0.0628)QGELT(0.3124)PANS(0.3124)QS(0.3124)R;
EGSPAPLEPEPGAAQPK	EGS[79.9663]PAPLEPEPGAAQPK	R	L	396	412	17	2	3S(79.9663)	sp|Q01167|FOXK2_HUMAN	Q01167	FOXK2_HUMAN	FOXK2	Forkhead box protein K2			1	1.69569e+06	MS/MS	STY:79.9663@EGS(1.0000)PAPLEPEPGAAQPK;
EGSPIPHDPEFGSK	EGS[79.9663]PIPHDPEFGSK	R	L	443	456	14	2	3S(79.9663)	sp|P85037|FOXK1_HUMAN	P85037	FOXK1_HUMAN	FOXK1	Forkhead box protein K1			4	819899	MS/MS	STY:79.9663@EGS(0.9191)PIPHDPEFGS(0.0809)K;
EGSQGELTPANSQSR	EGS[79.9663]QGELTPANSQSR	R	M	472	486	15	2	3S(79.9663)	sp|Q13098|CSN1_HUMAN	Q13098	CSN1_HUMAN	GPS1	COP9 signalosome complex subunit 1			1	0	MS/MS	STY:79.9663@EGS(0.3295)QGELT(0.3295)PANS(0.3295)QS(0.0114)R;
EGTLTQVPLAPPPPGAPPSPAPAR	EGTLTQVPLAPPPPGAPPS[79.9663]PAPAR	K	F	1129	1152	24	3	19S(79.9663)	sp|P48634|PRC2A_HUMAN	P48634	PRC2A_HUMAN	PRRC2A	Protein PRRC2A			1	227774	MS/MS	STY:79.9663@EGT(0.2738)LT(0.2738)QVPLAPPPPGAPPS(0.4525)PAPAR;
EGTPGSPSETPGPSPAGPAGDEPAESPSETPGPR	EGTPGSPSETPGPS[79.9663]PAGPAGDEPAESPSETPGPR	K	P	512	545	34	3	14S(79.9663)	sp|Q9NZT2|OGFR_HUMAN	Q9NZT2	OGFR_HUMAN	OGFR	Opioid growth factor receptor			1	3.84668e+06	MS/MS	STY:79.9663@EGT(0.0139)PGS(0.0139)PS(0.0139)ET(0.0139)PGPS(0.2361)PAGPAGDEPAES(0.2361)PS(0.2361)ET(0.2361)PGPR;
EGTAPSENGETK	EGT[79.9663]APSENGETK	K	A	73	84	12	2	3T(79.9663)	sp|Q15651|HMGN3_HUMAN	Q15651	HMGN3_HUMAN	HMGN3	High mobility group nucleosome-binding domain-containing protein 3			3	880739	MS/MS	STY:79.9663@EGT(0.4832)APS(0.4832)ENGET(0.0337)K;
EGTPGSPSETPGPSPAGPAGDEPAESPSETPGPR	EGT[79.9663]PGSPSETPGPSPAGPAGDEPAESPSETPGPR	K	P	512	545	34	3	3T(79.9663)	sp|Q9NZT2|OGFR_HUMAN	Q9NZT2	OGFR_HUMAN	OGFR	Opioid growth factor receptor			1	3.84668e+06	MS/MS	STY:79.9663@EGT(0.5155)PGS(0.1491)PS(0.1491)ET(0.1491)PGPS(0.0093)PAGPAGDEPAES(0.0093)PS(0.0093)ET(0.0093)PGPR;
EGTPPPPPPSR	EGT[79.9663]PPPPPPSR	R	D	1381	1391	11	2	3T(79.9663)	sp|Q9Y618|NCOR2_HUMAN	Q9Y618	NCOR2_HUMAN	NCOR2	Nuclear receptor corepressor 2			1	704128	MS/MS	STY:79.9663@EGT(0.9452)PPPPPPS(0.0548)R;
EGVQGPLNVSLSEEGK	EGVQGPLNVS[79.9663]LSEEGK	K	S	1176	1191	16	2	10S(79.9663)	sp|P12270|TPR_HUMAN	P12270	TPR_HUMAN	TPR	Nucleoprotein TPR			1	809896	MS/MS	STY:79.9663@EGVQGPLNVS(0.5000)LS(0.5000)EEGK;
EIAIVHSDAEK	EIAIVHS[79.9663]DAEK	K	E	341	351	11	2	7S(79.9663)	sp|Q9H307|PININ_HUMAN	Q9H307	PININ_HUMAN	PNN	Pinin			22	3.35225e+06	MS/MS	STY:79.9663@EIAIVHS(1.0000)DAEK;
EIPSATQSPISK	EIPSATQS[79.9663]PISK	K	K	1156	1167	12	2	8S(79.9663)	sp|Q9BQG0|MBB1A_HUMAN	Q9BQG0	MBB1A_HUMAN	MYBBP1A	Myb-binding protein 1A			2	3038581	MS/MS	STY:79.9663@EIPS(0.0203)AT(0.0203)QS(0.9409)PIS(0.0186)K;
EIPSATQSPISK	EIPSAT[79.9663]QSPISK	K	K	1156	1167	12	2	6T(79.9663)	sp|Q9BQG0|MBB1A_HUMAN	Q9BQG0	MBB1A_HUMAN	MYBBP1A	Myb-binding protein 1A			1	3038581	MS/MS	STY:79.9663@EIPS(0.0084)AT(0.3305)QS(0.3305)PIS(0.3305)K;
EIPSATQSPISK	EIPS[79.9663]ATQSPISK	K	K	1156	1167	12	2	4S(79.9663)	sp|Q9BQG0|MBB1A_HUMAN	Q9BQG0	MBB1A_HUMAN	MYBBP1A	Myb-binding protein 1A			2	3038581	MS/MS	STY:79.9663@EIPS(0.2500)AT(0.2500)QS(0.2500)PIS(0.2500)K;
EIQNGNLHESDSESVPR	EIQNGNLHESDSES[79.9663]VPR	K	D	66	82	17	2,3	14S(79.9663)	sp|Q86UP2|KTN1_HUMAN	Q86UP2	KTN1_HUMAN	KTN1	Kinectin			3	2280102	MS/MS	STY:79.9663@EIQNGNLHES(0.0690)DS(0.0690)ES(0.8621)VPR;
EIQNGNLHESDSESVPR	EIQNGNLHESDS[79.9663]ESVPR	K	D	66	82	17	2,3	12S(79.9663)	sp|Q86UP2|KTN1_HUMAN	Q86UP2	KTN1_HUMAN	KTN1	Kinectin			7	5.4009e+06	MS/MS	STY:79.9663@EIQNGNLHES(0.0284)DS(0.9436)ES(0.0280)VPR;
EIQNGNLHESDSESVPR	EIQNGNLHES[79.9663]DSESVPR	K	D	66	82	17	2,3	10S(79.9663)	sp|Q86UP2|KTN1_HUMAN	Q86UP2	KTN1_HUMAN	KTN1	Kinectin			26	6464716	MS/MS	STY:79.9663@EIQNGNLHES(0.9425)DS(0.0288)ES(0.0288)VPR;
EISPGSGPGEIR	EISPGS[79.9663]GPGEIR	K	K	713	724	12	2	6S(79.9663)	sp|O43491|E41L2_HUMAN	O43491	E41L2_HUMAN	EPB41L2	Band 4.1-like protein 2			1	1.40222e+06	MS/MS	STY:79.9663@EIS(0.0630)PGS(0.9370)GPGEIR;
EISDDEAEEEK	EIS[79.9663]DDEAEEEK	K	G	224	234	11	2	3S(79.9663)	sp|P08238|HS90B_HUMAN	P08238	HS90B_HUMAN	HSP90AB1	Heat shock protein HSP 90-beta	HSP90AB3P	sp|Q58FF7|H90B3_HUMAN	196	8.5430682E8	MS/MS	STY:79.9663@EIS(1.0000)DDEAEEEK;
EISPGSGPGEIR	EIS[79.9663]PGSGPGEIR	K	K	713	724	12	2	3S(79.9663)	sp|O43491|E41L2_HUMAN	O43491	E41L2_HUMAN	EPB41L2	Band 4.1-like protein 2			3	1.40222e+06	MS/MS	STY:79.9663@EIS(0.9465)PGS(0.0535)GPGEIR;
EKEISDDEAEEEK	EKEIS[79.9663]DDEAEEEK	R	G	222	234	13	2	5S(79.9663)	sp|P08238|HS90B_HUMAN	P08238	HS90B_HUMAN	HSP90AB1	Heat shock protein HSP 90-beta			26	7185575	MS/MS	STY:79.9663@EKEIS(1.0000)DDEAEEEK;
EKTPELPEPSVK	EKTPELPEPS[79.9663]VK	K	V	218	229	12	2	10S(79.9663)	sp|Q8IYB3|SRRM1_HUMAN	Q8IYB3	SRRM1_HUMAN	SRRM1	Serine/arginine repetitive matrix protein 1			2	4030133	MS/MS	STY:79.9663@EKT(0.0986)PELPEPS(0.9014)VK;
EKTPELPEPSVK	EKT[79.9663]PELPEPSVK	K	V	218	229	12	2,3	3T(79.9663)	sp|Q8IYB3|SRRM1_HUMAN	Q8IYB3	SRRM1_HUMAN	SRRM1	Serine/arginine repetitive matrix protein 1			35	6197956	MS/MS	STY:79.9663@EKT(0.9463)PELPEPS(0.0537)VK;
EKTPSPKEEDEEPESPPEK	EKT[79.9663]PS[79.9663]PKEEDEEPES[79.9663]PPEK	K	K	200	218	19	3	15S(79.9663),3T(79.9663),5S(79.9663)	sp|Q9H1E3|NUCKS_HUMAN	Q9H1E3	NUCKS_HUMAN	NUCKS1	Nuclear ubiquitous casein and cyclin-dependent kinase substrate 1			12	7973828	MS/MS	STY:79.9663@EKT(1.0000)PS(1.0000)PKEEDEEPES(1.0000)PPEK;
ELASPVSPELR	ELAS[79.9663]PVSPELR	K	Q	175	185	11	2	4S(79.9663)	sp|Q5T4S7|UBR4_HUMAN	Q5T4S7	UBR4_HUMAN	UBR4	E3 ubiquitin-protein ligase UBR4			1	248575	MS/MS	STY:79.9663@ELAS(0.9446)PVS(0.0554)PELR;
ELDEEGSDPPLPGR	ELDEEGS[79.9663]DPPLPGR	R	A	169	182	14	2	7S(79.9663)	sp|Q9BRJ6|CHOLN_HUMAN	Q9BRJ6	CHOLN_HUMAN	CHLSN	Protein cholesin			9	3.30946e+06	MS/MS	STY:79.9663@ELDEEGS(1.0000)DPPLPGR;
ELEEEEENSDEDELDSHTMVK	ELEEEEENSDEDELDS[79.9663]HTMVK	R	T	308	328	21	3	16S(79.9663)	sp|Q13188|STK3_HUMAN	Q13188	STK3_HUMAN	STK3	Serine/threonine-protein kinase 3			1	1067530	MS/MS	STY:79.9663@ELEEEEENS(0.1162)DEDELDS(0.4419)HT(0.4419)MVK;
ELEEEEENSDEDELDSHTMVK	ELEEEEENS[79.9663]DEDELDSHTMVK	R	T	308	328	21	3	9S(79.9663)	sp|Q13188|STK3_HUMAN	Q13188	STK3_HUMAN	STK3	Serine/threonine-protein kinase 3			3	880116	MS/MS	STY:79.9663@ELEEEEENS(0.8963)DEDELDS(0.0518)HT(0.0518)MVK;
ELEEVSPETPVVPATTQR	ELEEVS[79.9663]PETPVVPATTQR	K	T	144	161	18	2	6S(79.9663)	sp|Q15149|PLEC_HUMAN	Q15149	PLEC_HUMAN	PLEC	Plectin			2	1.09182e+06	MS/MS	STY:79.9663@ELEEVS(0.9181)PET(0.0273)PVVPAT(0.0273)T(0.0273)QR;
ELEHNAEETYGENDENTDDK	ELEHNAEETYGENDENT[79.9663]DDK	R	N	632	651	20	2	17T(79.9663)	sp|O00461|GOLI4_HUMAN	O00461	GOLI4_HUMAN	GOLIM4	Golgi integral membrane protein 4			2	1.28975e+06	MS/MS	STY:79.9663@ELEHNAEET(0.1761)Y(0.1761)GENDENT(0.6479)DDK;
ELEHNAEETYGENDENTDDK	ELEHNAEETY[79.9663]GENDENTDDK	R	N	632	651	20	2	10Y(79.9663)	sp|O00461|GOLI4_HUMAN	O00461	GOLI4_HUMAN	GOLIM4	Golgi integral membrane protein 4			1	1.00019e+06	MS/MS	STY:79.9663@ELEHNAEET(0.0456)Y(0.4772)GENDENT(0.4772)DDK;
ELEHNAEETYGENDENTDDK	ELEHNAEET[79.9663]YGENDENTDDK	R	N	632	651	20	2	9T(79.9663)	sp|O00461|GOLI4_HUMAN	O00461	GOLI4_HUMAN	GOLIM4	Golgi integral membrane protein 4			4	1.18318e+06	MS/MS	STY:79.9663@ELEHNAEET(0.4775)Y(0.4775)GENDENT(0.0450)DDK;
ELESSEEGGSAEER	ELES[79.9663]SEEGGSAEER	K	R	15	28	14	2	4S(79.9663)	sp|Q9HAS0|NJMU_HUMAN	Q9HAS0	NJMU_HUMAN	C17orf75	Protein Njmu-R1			1	683106	MS/MS	STY:79.9663@ELES(0.4728)S(0.4728)EEGGS(0.0545)AEER;
ELGTGEQPLSPTTATSPYGGGHALAGQTSPK	ELGTGEQPLSPTTAT[79.9663]S[79.9663]PYGGGHALAGQTSPK	R	Q	631	661	31	3	15T(79.9663),16S(79.9663)	sp|Q96NU1|SAM11_HUMAN	Q96NU1	SAM11_HUMAN	SAMD11	Sterile alpha motif domain-containing protein 11			1	2.03388e+06	MS/MS	STY:79.9663@ELGT(0.0134)GEQPLS(0.0406)PT(0.0406)T(0.0406)AT(0.4621)S(0.4621)PY(0.0166)GGGHALAGQT(0.4621)S(0.4621)PK;
ELIPQESPR	ELIPQES[79.9663]PR	K	V	286	294	9	2	7S(79.9663)	sp|Q96DF8|ESS2_HUMAN	Q96DF8	ESS2_HUMAN	ESS2	Splicing factor ESS-2 homolog			1	810169	MS/MS	STY:79.9663@ELIPQES(1.0000)PR;
ELLDTSFEDLSK	ELLDT[79.9663]SFEDLSK	R	P	230	241	12	2	5T(79.9663)	sp|P78345|RPP38_HUMAN	P78345	RPP38_HUMAN	RPP38	Ribonuclease P protein subunit p38			1	0	MS/MS	STY:79.9663@ELLDT(0.4909)S(0.4909)FEDLS(0.0183)K;
ELPPSPEKK	ELPPS[79.9663]PEKK	K	T	692	700	9	2	5S(79.9663)	sp|P27816|MAP4_HUMAN	P27816	MAP4_HUMAN	MAP4	Microtubule-associated protein 4			1	409457	MS/MS	STY:79.9663@ELPPS(1.0000)PEKK;
ELQGDGPPSSPTNDPTVK	ELQGDGPPSSPTNDPT[79.9663]VK	K	Y	704	721	18	2	16T(79.9663)	sp|Q12873|CHD3_HUMAN	Q12873	CHD3_HUMAN	CHD3	Chromodomain-helicase-DNA-binding protein 3			1	2.82189e+06	MS/MS	STY:79.9663@ELQGDGPPS(0.3427)S(0.0210)PT(0.0210)NDPT(0.6154)VK;
ELSDQATASPIVAR	ELSDQATAS[79.9663]PIVAR	K	T	88	101	14	2	9S(79.9663)	sp|Q5JSH3|WDR44_HUMAN	Q5JSH3	WDR44_HUMAN	WDR44	WD repeat-containing protein 44			1	1.14064e+06	MS/MS	STY:79.9663@ELS(0.0276)DQAT(0.0293)AS(0.9432)PIVAR;
ELSDQATASPIVAR	ELSDQAT[79.9663]ASPIVAR	K	T	88	101	14	2	7T(79.9663)	sp|Q5JSH3|WDR44_HUMAN	Q5JSH3	WDR44_HUMAN	WDR44	WD repeat-containing protein 44			1	825637	MS/MS	STY:79.9663@ELS(0.0186)DQAT(0.4907)AS(0.4907)PIVAR;
ELSNSPLR	ELSNS[79.9663]PLR	K	E	1316	1323	8	2	5S(79.9663)	sp|Q9UQ35|SRRM2_HUMAN	Q9UQ35	SRRM2_HUMAN	SRRM2	Serine/arginine repetitive matrix protein 2			1	3008862	MS/MS	STY:79.9663@ELS(0.0583)NS(0.9417)PLR;
ELSPAGSISK	ELSPAGS[79.9663]ISK	K	N	617	626	10	2	7S(79.9663)	sp|O95453|PARN_HUMAN	O95453	PARN_HUMAN	PARN	Poly(A)-specific ribonuclease PARN			1	1.14883e+06	MS/MS	STY:79.9663@ELS(0.4489)PAGS(0.4809)IS(0.0702)K;
ELSNSPLR	ELS[79.9663]NSPLR	K	E	1316	1323	8	2	3S(79.9663)	sp|Q9UQ35|SRRM2_HUMAN	Q9UQ35	SRRM2_HUMAN	SRRM2	Serine/arginine repetitive matrix protein 2			2	3008862	MS/MS	STY:79.9663@ELS(0.5000)NS(0.5000)PLR;
ELSNSPLRENSFGSPLEFR	ELS[79.9663]NSPLRENSFGS[79.9663]PLEFR	K	N	1316	1334	19	3	14S(79.9663),3S(79.9663)	sp|Q9UQ35|SRRM2_HUMAN	Q9UQ35	SRRM2_HUMAN	SRRM2	Serine/arginine repetitive matrix protein 2			1	635796	MS/MS	STY:79.9663@ELS(0.9064)NS(0.0974)PLRENS(0.0974)FGS(0.8988)PLEFR;
ELSPAGSISK	ELS[79.9663]PAGSISK	K	N	617	626	10	2	3S(79.9663)	sp|O95453|PARN_HUMAN	O95453	PARN_HUMAN	PARN	Poly(A)-specific ribonuclease PARN			2	2.78353e+06	MS/MS	STY:79.9663@ELS(0.9412)PAGS(0.0294)IS(0.0294)K;
ELTPASPTCTNSVSK	ELTPAS[79.9663]PTC[57.0215]TNSVSK	R	N	521	535	15	2	6S(79.9663),9C(57.0215)	sp|P28715|ERCC5_HUMAN	P28715	ERCC5_HUMAN	ERCC5	DNA excision repair protein ERCC-5			2	1.74431e+06	MS/MS	STY:79.9663@ELT(0.0373)PAS(0.9023)PT(0.0151)CT(0.0151)NS(0.0151)VS(0.0151)K;
ELTPASPTCTNSVSK	ELT[79.9663]PASPTC[57.0215]TNSVSK	R	N	521	535	15	2	3T(79.9663),9C(57.0215)	sp|P28715|ERCC5_HUMAN	P28715	ERCC5_HUMAN	ERCC5	DNA excision repair protein ERCC-5			1	1.74431e+06	MS/MS	STY:79.9663@ELT(0.1667)PAS(0.1667)PT(0.1667)CT(0.1667)NS(0.1667)VS(0.1667)K;
ELVSSSSSGSDSDSEVDKK	ELVSSSSSGSDS[79.9663]DSEVDKK	K	L	6	24	19	2	12S(79.9663)	sp|P53999|TCP4_HUMAN	P53999	TCP4_HUMAN	SUB1	Activated RNA polymerase II transcriptional coactivator p15			1	467296	MS/MS	STY:79.9663@ELVS(0.0090)S(0.0090)S(0.0263)S(0.0263)S(0.0263)GS(0.0263)DS(0.4384)DS(0.4384)EVDKK;
EMEVEESPEK	EMEVEES[79.9663]PEK	K	I	502	511	10	2	7S(79.9663)	sp|Q8N3X1|FNBP4_HUMAN	Q8N3X1	FNBP4_HUMAN	FNBP4	Formin-binding protein 4			2	1.51418e+06	MS/MS	STY:79.9663@EMEVEES(1.0000)PEK;
EMLASDDEEDVSSK	EMLASDDEEDVS[79.9663]SK	K	V	76	89	14	2	12S(79.9663)	sp|Q0ZGT2|NEXN_HUMAN	Q0ZGT2	NEXN_HUMAN	NEXN	Nexilin			1	1.6766156E7	MS/MS	STY:79.9663@EMLAS(0.0213)DDEEDVS(0.4893)S(0.4893)K;
EMLASDDEEDVSSK	EMLAS[79.9663]DDEEDVSSK	K	V	76	89	14	2	5S(79.9663)	sp|Q0ZGT2|NEXN_HUMAN	Q0ZGT2	NEXN_HUMAN	NEXN	Nexilin			6	1.6766156E7	MS/MS	STY:79.9663@EMLAS(0.9446)DDEEDVS(0.0278)S(0.0277)K;
EMLMEDVGSEEEQEEEDEAPFQEK	EMLMEDVGS[79.9663]EEEQEEEDEAPFQEK	R	D	105	128	24	3	9S(79.9663)	sp|Q9H1E3|NUCKS_HUMAN	Q9H1E3	NUCKS_HUMAN	NUCKS1	Nuclear ubiquitous casein and cyclin-dependent kinase substrate 1			9	7.4071728E7	MS/MS	STY:79.9663@EMLMEDVGS(1.0000)EEEQEEEDEAPFQEK;
EMLMEDVGSEEEQEEEDEAPFQEK	EMLM[15.9949]EDVGS[79.9663]EEEQEEEDEAPFQEK	R	D	105	128	24	3	4M(15.9949),9S(79.9663)	sp|Q9H1E3|NUCKS_HUMAN	Q9H1E3	NUCKS_HUMAN	NUCKS1	Nuclear ubiquitous casein and cyclin-dependent kinase substrate 1			2	2151505	MS/MS	STY:79.9663@EMLMEDVGS(1.0000)EEEQEEEDEAPFQEK;M:15.9949@EM(0.0592)LM(0.9408)EDVGSEEEQEEEDEAPFQEK;
EMLASDDEEDVSSK	EM[15.9949]LASDDEEDVS[79.9663]SK	K	V	76	89	14	2	12S(79.9663),2M(15.9949)	sp|Q0ZGT2|NEXN_HUMAN	Q0ZGT2	NEXN_HUMAN	NEXN	Nexilin			1	1.07316e+06	MS/MS	STY:79.9663@EMLAS(0.0215)DDEEDVS(0.4893)S(0.4893)K;M:15.9949@EM(1.0000)LASDDEEDVSSK;
EMLASDDEEDVSSK	EM[15.9949]LAS[79.9663]DDEEDVSSK	K	V	76	89	14	2	2M(15.9949),5S(79.9663)	sp|Q0ZGT2|NEXN_HUMAN	Q0ZGT2	NEXN_HUMAN	NEXN	Nexilin			16	4.39595e+06	MS/MS	STY:79.9663@EMLAS(0.9419)DDEEDVS(0.0290)S(0.0290)K;M:15.9949@EM(1.0000)LASDDEEDVSSK;
EMLMEDVGSEEEQEEEDEAPFQEK	EM[15.9949]LMEDVGS[79.9663]EEEQEEEDEAPFQEK	R	D	105	128	24	3	2M(15.9949),9S(79.9663)	sp|Q9H1E3|NUCKS_HUMAN	Q9H1E3	NUCKS_HUMAN	NUCKS1	Nuclear ubiquitous casein and cyclin-dependent kinase substrate 1			14	8544029	MS/MS	STY:79.9663@EMLMEDVGS(1.0000)EEEQEEEDEAPFQEK;M:15.9949@EM(0.8992)LM(0.1008)EDVGSEEEQEEEDEAPFQEK;
EMLMEDVGSEEEQEEEDEAPFQEK	EM[15.9949]LM[15.9949]EDVGS[79.9663]EEEQEEEDEAPFQEK	R	D	105	128	24	3	2M(15.9949),4M(15.9949),9S(79.9663)	sp|Q9H1E3|NUCKS_HUMAN	Q9H1E3	NUCKS_HUMAN	NUCKS1	Nuclear ubiquitous casein and cyclin-dependent kinase substrate 1			3	2.63706e+06	MS/MS	STY:79.9663@EMLMEDVGS(1.0000)EEEQEEEDEAPFQEK;M:15.9949@EM(1.0000)LM(1.0000)EDVGSEEEQEEEDEAPFQEK;
ENASPAPGTTAEEAMSR	ENASPAPGTTAEEAM[15.9949]S[79.9663]R	R	G	970	986	17	2	15M(15.9949),16S(79.9663)	sp|P46379|BAG6_HUMAN	P46379	BAG6_HUMAN	BAG6	Large proline-rich protein BAG6			1	710954	MS/MS	STY:79.9663@ENAS(0.0343)PAPGT(0.0343)T(0.0343)AEEAMS(0.8970)R;M:15.9949@ENASPAPGTTAEEAM(1.0000)SR;
ENASPAPGTTAEEAMSR	ENAS[79.9663]PAPGTTAEEAMSR	R	G	970	986	17	2	4S(79.9663)	sp|P46379|BAG6_HUMAN	P46379	BAG6_HUMAN	BAG6	Large proline-rich protein BAG6			2	4.32578e+06	MS/MS	STY:79.9663@ENAS(0.9279)PAPGT(0.0187)T(0.0234)AEEAMS(0.0300)R;
ENDTVTISPK	ENDT[79.9663]VTISPK	K	Q	1515	1524	10	2	4T(79.9663)	sp|Q9UGU0|TCF20_HUMAN	Q9UGU0	TCF20_HUMAN	TCF20	Transcription factor 20			1	224638	MS/MS	STY:79.9663@ENDT(0.3333)VT(0.3333)IS(0.3333)PK;
ENETDEENTEVMIK	ENET[79.9663]DEENTEVMIK	K	G	1085	1098	14	2	4T(79.9663)	sp|Q9HAU5|RENT2_HUMAN	Q9HAU5	RENT2_HUMAN	UPF2	Regulator of nonsense transcripts 2			2	1.33956e+06	MS/MS	STY:79.9663@ENET(0.9391)DEENT(0.0609)EVMIK;
ENPDSDADLDVDGDDTLEYGK	ENPDS[79.9663]DADLDVDGDDTLEYGK	K	P	386	406	21	2	5S(79.9663)	sp|Q5VTB9|RN220_HUMAN	Q5VTB9	RN220_HUMAN	RNF220	E3 ubiquitin-protein ligase RNF220			1	0	MS/MS	STY:79.9663@ENPDS(0.8852)DADLDVDGDDT(0.0574)LEY(0.0574)GK;
ENPPVEDSSDEDDK	ENPPVEDS[79.9663]SDEDDK	R	R	491	504	14	2	8S(79.9663)	sp|Q8TCJ2|STT3B_HUMAN	Q8TCJ2	STT3B_HUMAN	STT3B	Dolichyl-diphosphooligosaccharide--protein glycosyltransferase subunit STT3B			11	5.661e+06	MS/MS	STY:79.9663@ENPPVEDS(0.9434)S(0.0566)DEDDK;
ENPPVEDSSDEDDKR	ENPPVEDS[79.9663]SDEDDKR	R	N	491	505	15	2	8S(79.9663)	sp|Q8TCJ2|STT3B_HUMAN	Q8TCJ2	STT3B_HUMAN	STT3B	Dolichyl-diphosphooligosaccharide--protein glycosyltransferase subunit STT3B			1	556050	MS/MS	STY:79.9663@ENPPVEDS(0.8812)S(0.1188)DEDDKR;
ENPPVEDSSDEDDK	ENPPVEDS[79.9663]S[79.9663]DEDDK	R	R	491	504	14	2	8S(79.9663),9S(79.9663)	sp|Q8TCJ2|STT3B_HUMAN	Q8TCJ2	STT3B_HUMAN	STT3B	Dolichyl-diphosphooligosaccharide--protein glycosyltransferase subunit STT3B			1	1.21821e+06	MS/MS	STY:79.9663@ENPPVEDS(1.0000)S(1.0000)DEDDK;
ENSFGSPLEFR	ENS[79.9663]FGSPLEFR	R	N	1324	1334	11	2	3S(79.9663)	sp|Q9UQ35|SRRM2_HUMAN	Q9UQ35	SRRM2_HUMAN	SRRM2	Serine/arginine repetitive matrix protein 2			2	1.04098e+06	MS/MS	STY:79.9663@ENS(0.7325)FGS(0.2675)PLEFR;
ENSGPVENGVSDQEGEEQAR	ENS[79.9663]GPVENGVSDQEGEEQAR	K	E	768	787	20	3	3S(79.9663)	sp|Q8TEQ6|GEMI5_HUMAN	Q8TEQ6	GEMI5_HUMAN	GEMIN5	Gem-associated protein 5			1	321675	MS/MS	STY:79.9663@ENS(0.6501)GPVENGVS(0.3499)DQEGEEQAR;
ENSPAAFPDR	ENS[79.9663]PAAFPDR	R	E	738	747	10	2	3S(79.9663)	sp|Q9Y5B0|CTDP1_HUMAN	Q9Y5B0	CTDP1_HUMAN	CTDP1	RNA polymerase II subunit A C-terminal domain phosphatase			1	220291	MS/MS	STY:79.9663@ENS(1.0000)PAAFPDR;
ENVEYIEREESDGEYDEFGR	ENVEYIEREES[79.9663]DGEYDEFGR	R	K	110	129	20	3	11S(79.9663)	sp|O95218|ZRAB2_HUMAN	O95218	ZRAB2_HUMAN	ZRANB2	Zinc finger Ran-binding domain-containing protein 2			3	885913	MS/MS	STY:79.9663@ENVEY(0.0431)IEREES(0.9254)DGEY(0.0315)DEFGR;
EPAITSQNSPEAR	EPAITSQNS[79.9663]PEAR	K	E	92	104	13	2	9S(79.9663)	sp|P23193|TCEA1_HUMAN	P23193	TCEA1_HUMAN	TCEA1	Transcription elongation factor A protein 1			6	1.9886062E7	MS/MS	STY:79.9663@EPAIT(0.0280)S(0.0280)QNS(0.9440)PEAR;
EPAITSQNSPEAR	EPAITS[79.9663]QNSPEAR	K	E	92	104	13	2	6S(79.9663)	sp|P23193|TCEA1_HUMAN	P23193	TCEA1_HUMAN	TCEA1	Transcription elongation factor A protein 1			1	1.9886062E7	MS/MS	STY:79.9663@EPAIT(0.0166)S(0.4917)QNS(0.4917)PEAR;
EPAITSQNSPEAR	EPAIT[79.9663]SQNSPEAR	K	E	92	104	13	2	5T(79.9663)	sp|P23193|TCEA1_HUMAN	P23193	TCEA1_HUMAN	TCEA1	Transcription elongation factor A protein 1			4	1.9886062E7	MS/MS	STY:79.9663@EPAIT(0.3371)S(0.3371)QNS(0.3259)PEAR;
EPALPLEPDSGGNTSPGVTANGEAR	EPALPLEPDSGGNT[79.9663]SPGVTANGEAR	R	T	682	706	25	3	14T(79.9663)	sp|Q92974|ARHG2_HUMAN	Q92974	ARHG2_HUMAN	ARHGEF2	Rho guanine nucleotide exchange factor 2			2	3.18108e+06	MS/MS	STY:79.9663@EPALPLEPDS(0.0858)GGNT(0.4510)S(0.4510)PGVT(0.0122)ANGEAR;
EPALPLEPDSGGNTSPGVTANGEAR	EPALPLEPDS[79.9663]GGNTSPGVTANGEAR	R	T	682	706	25	3	10S(79.9663)	sp|Q92974|ARHG2_HUMAN	Q92974	ARHG2_HUMAN	ARHGEF2	Rho guanine nucleotide exchange factor 2			2	3.18108e+06	MS/MS	STY:79.9663@EPALPLEPDS(0.6033)GGNT(0.1105)S(0.1105)PGVT(0.1757)ANGEAR;
EPDATPPSPR	EPDAT[79.9663]PPSPR	K	T	334	343	10	2	5T(79.9663)	sp|P28715|ERCC5_HUMAN	P28715	ERCC5_HUMAN	ERCC5	DNA excision repair protein ERCC-5			2	631360	MS/MS	STY:79.9663@EPDAT(0.8929)PPS(0.1071)PR;
EPEMPGPREESEEEEDEDDEEEEEEEK	EPEMPGPREES[79.9663]EEEEDEDDEEEEEEEK	K	E	22	48	27	3	11S(79.9663)	sp|P35659|DEK_HUMAN	P35659	DEK_HUMAN	DEK	Protein DEK			23	1.5924353E7	MS/MS	STY:79.9663@EPEMPGPREES(1.0000)EEEEDEDDEEEEEEEK;
EPEMPGPREESEEEEDEDDEEEEEEEK	EPEM[15.9949]PGPREES[79.9663]EEEEDEDDEEEEEEEK	K	E	22	48	27	3	11S(79.9663),4M(15.9949)	sp|P35659|DEK_HUMAN	P35659	DEK_HUMAN	DEK	Protein DEK			7	2.70334e+06	MS/MS	STY:79.9663@EPEMPGPREES(1.0000)EEEEDEDDEEEEEEEK;M:15.9949@EPEM(1.0000)PGPREESEEEEDEDDEEEEEEEK;
EPEPAAGPQAEESATVSAPAPMSPTR	EPEPAAGPQAEESATVSAPAPMS[79.9663]PTR	R	R	161	186	26	3	23S(79.9663)	sp|Q9BWG6|SCNM1_HUMAN	Q9BWG6	SCNM1_HUMAN	SCNM1	Sodium channel modifier 1			1	0	MS/MS	STY:79.9663@EPEPAAGPQAEES(0.0102)AT(0.0104)VS(0.0160)APAPMS(0.4817)PT(0.4817)R;
EPGSPPSVQR	EPGS[79.9663]PPSVQR	R	A	44	53	10	2	4S(79.9663)	sp|Q9H6F5|CCD86_HUMAN	Q9H6F5	CCD86_HUMAN	CCDC86	Coiled-coil domain-containing protein 86			1	683932	MS/MS	STY:79.9663@EPGS(0.5000)PPS(0.5000)VQR;
EPSEVPTPK	EPSEVPT[79.9663]PK	K	R	47	55	9	2	7T(79.9663)	sp|P17096|HMGA1_HUMAN	P17096	HMGA1_HUMAN	HMGA1	High mobility group protein HMG-I/HMG-Y			1	1.8079e+06	MS/MS	STY:79.9663@EPS(0.0730)EVPT(0.9270)PK;
EPSEVPTPK	EPS[79.9663]EVPTPK	K	R	47	55	9	2	3S(79.9663)	sp|P17096|HMGA1_HUMAN	P17096	HMGA1_HUMAN	HMGA1	High mobility group protein HMG-I/HMG-Y			4	1833783	MS/MS	STY:79.9663@EPS(0.9130)EVPT(0.0870)PK;
EPVADEEEEDSDDDVEPITEFR	EPVADEEEEDSDDDVEPIT[79.9663]EFR	K	F	92	113	22	3	19T(79.9663)	sp|P54105|ICLN_HUMAN	P54105	ICLN_HUMAN	CLNS1A	Methylosome subunit pICln			3	9551846	MS/MS	STY:79.9663@EPVADEEEEDS(0.0553)DDDVEPIT(0.9447)EFR;
EPVADEEEEDSDDDVEPITEFR	EPVADEEEEDS[79.9663]DDDVEPITEFR	K	F	92	113	22	2,3	11S(79.9663)	sp|P54105|ICLN_HUMAN	P54105	ICLN_HUMAN	CLNS1A	Methylosome subunit pICln			9	2.969324E7	MS/MS	STY:79.9663@EPVADEEEEDS(0.9470)DDDVEPIT(0.0530)EFR;
EQESDEEEEEEEEDEPSGATTR	EQES[79.9663]DEEEEEEEEDEPSGATTR	K	S	2983	3004	22	2	4S(79.9663)	sp|Q8NFC6|BD1L1_HUMAN	Q8NFC6	BD1L1_HUMAN	BOD1L1	Biorientation of chromosomes in cell division protein 1-like 1			1	0	MS/MS	STY:79.9663@EQES(0.2500)DEEEEEEEEDEPS(0.2500)GAT(0.2500)T(0.2500)R;
EQISDIDDAVR	EQIS[79.9663]DIDDAVR	K	K	115	125	11	2	4S(79.9663)	sp|P53999|TCP4_HUMAN	P53999	TCP4_HUMAN	SUB1	Activated RNA polymerase II transcriptional coactivator p15			1	582160	MS/MS	STY:79.9663@EQIS(1.0000)DIDDAVR;
EQLSETEGSGEDEPGNDPSETTQK	EQLS[79.9663]ET[79.9663]EGSGEDEPGNDPSETTQK	K	K	672	695	24	3	4S(79.9663),6T(79.9663)	sp|Q13107|UBP4_HUMAN	Q13107	UBP4_HUMAN	USP4	Ubiquitin carboxyl-terminal hydrolase 4			1	380452	MS/MS	STY:79.9663@EQLS(0.4943)ET(0.4943)EGS(0.4943)GEDEPGNDPS(0.1724)ET(0.1724)T(0.1724)QK;
EQPEMEDANSEK	EQPEMEDANS[79.9663]EK	R	S	11	22	12	2	10S(79.9663)	sp|Q13523|PRP4K_HUMAN	Q13523	PRP4K_HUMAN	PRP4K	Serine/threonine-protein kinase PRP4 homolog			8	2.81183e+06	MS/MS	STY:79.9663@EQPEMEDANS(1.0000)EK;
EQSEVSVSPR	EQSEVSVS[79.9663]PR	K	A	25	34	10	2	8S(79.9663)	sp|Q7L4I2|RSRC2_HUMAN	Q7L4I2	RSRC2_HUMAN	RSRC2	Arginine/serine-rich coiled-coil protein 2			1	5130604	MS/MS	STY:79.9663@EQS(0.0303)EVS(0.0303)VS(0.9395)PR;
EQSEVSVSPR	EQS[79.9663]EVSVSPR	K	A	25	34	10	2	3S(79.9663)	sp|Q7L4I2|RSRC2_HUMAN	Q7L4I2	RSRC2_HUMAN	RSRC2	Arginine/serine-rich coiled-coil protein 2			2	5130604	MS/MS	STY:79.9663@EQS(0.4806)EVS(0.1317)VS(0.3877)PR;
EREESEDELEEANGNNPIDIEVDQNK	EREES[79.9663]EDELEEANGNNPIDIEVDQNK	R	E	256	281	26	3	5S(79.9663)	sp|Q9UKL0|RCOR1_HUMAN	Q9UKL0	RCOR1_HUMAN	RCOR1	REST corepressor 1			1	0	MS/MS	STY:79.9663@EREES(1.0000)EDELEEANGNNPIDIEVDQNK;
ERSPALK	ERS[79.9663]PALK	R	S	246	252	7	2	3S(79.9663)	sp|Q9Y2W1|TR150_HUMAN	Q9Y2W1	TR150_HUMAN	THRAP3	Thyroid hormone receptor-associated protein 3			17	1.91712e+06	MS/MS	STY:79.9663@ERS(1.0000)PALK;
ESDQTLAALLSPK	ESDQTLAALLS[79.9663]PK	K	E	1687	1699	13	2	11S(79.9663)	sp|P18583|SON_HUMAN	P18583	SON_HUMAN	SON	Protein SON			1	4411933	MS/MS	STY:79.9663@ES(0.0274)DQT(0.0274)LAALLS(0.9451)PK;
ESEDKPEIEDVGSDEEEEK	ESEDKPEIEDVGS[79.9663]DEEEEK	K	K	251	269	19	2,3	13S(79.9663)	sp|P07900|HS90A_HUMAN	P07900	HS90A_HUMAN	HSP90AA1	Heat shock protein HSP 90-alpha			59	1.47724608E8	MS/MS	STY:79.9663@ES(0.0538)EDKPEIEDVGS(0.9462)DEEEEK;
ESEDKPEIEDVGSDEEEEKK	ESEDKPEIEDVGS[79.9663]DEEEEKK	K	D	251	270	20	3,4	13S(79.9663)	sp|P07900|HS90A_HUMAN	P07900	HS90A_HUMAN	HSP90AA1	Heat shock protein HSP 90-alpha			63	3.7583452E7	MS/MS	STY:79.9663@ES(0.0531)EDKPEIEDVGS(0.9469)DEEEEKK;
ESEDSETQPFDTHLEAYGPCLSPPR	ESEDSETQPFDTHLEAYGPC[57.0215]LS[79.9663]PPR	R	A	759	783	25	3	20C(57.0215),22S(79.9663)	sp|Q14676|MDC1_HUMAN	Q14676	MDC1_HUMAN	MDC1	Mediator of DNA damage checkpoint protein 1			1	1.11643e+06	MS/MS	STY:79.9663@ES(0.1759)EDS(0.0587)ET(0.0888)QPFDT(0.0114)HLEAY(0.0114)GPCLS(0.6539)PPR;
ESEGEEEDEDEDLSK	ESEGEEEDEDEDLS[79.9663]K	K	Y	152	166	15	2	14S(79.9663)	sp|O95218|ZRAB2_HUMAN	O95218	ZRAB2_HUMAN	ZRANB2	Zinc finger Ran-binding domain-containing protein 2			2	852640	MS/MS	STY:79.9663@ES(0.2974)EGEEEDEDEDLS(0.7026)K;
ESEQESEEEILAQK	ESEQES[79.9663]EEEILAQK	K	K	222	235	14	2	6S(79.9663)	sp|Q9BW71|HIRP3_HUMAN	Q9BW71	HIRP3_HUMAN	HIRIP3	HIRA-interacting protein 3			2	5.04749e+06	MS/MS	STY:79.9663@ES(0.0547)EQES(0.9453)EEEILAQK;
ESESESDETPPAAPQLIK	ESES[79.9663]ESDETPPAAPQLIK	R	K	450	467	18	2	4S(79.9663)	sp|O60832|DKC1_HUMAN	O60832	DKC1_HUMAN	DKC1	H/ACA ribonucleoprotein complex subunit DKC1			1	451885	MS/MS	STY:79.9663@ES(0.0285)ES(0.3238)ES(0.3238)DET(0.3238)PPAAPQLIK;
ESLKEEDESDDDNM	ESLKEEDES[79.9663]DDDNM	K	-	242	255	14	2	9S(79.9663)	sp|P25788|PSA3_HUMAN	P25788	PSA3_HUMAN	PSMA3	Proteasome subunit alpha type-3			18	7.6653152E7	MS/MS	STY:79.9663@ES(0.0534)LKEEDES(0.9466)DDDNM;
ESLKEEDESDDDNM	ESLKEEDES[79.9663]DDDNM[15.9949]	K	-	242	255	14	2	14M(15.9949),9S(79.9663)	sp|P25788|PSA3_HUMAN	P25788	PSA3_HUMAN	PSMA3	Proteasome subunit alpha type-3			7	3.94303e+06	MS/MS	STY:79.9663@ES(0.0552)LKEEDES(0.9448)DDDNM;M:15.9949@ESLKEEDESDDDNM(1.0000);
ESPRPLQLPGAEGPAISDGEEGGGEPGAGGGAAGAAGAGR	ESPRPLQLPGAEGPAIS[79.9663]DGEEGGGEPGAGGGAAGAAGAGR	R	R	74	113	40	3	17S(79.9663)	sp|Q6PKG0|LARP1_HUMAN	Q6PKG0	LARP1_HUMAN	LARP1	La-related protein 1			1	1.45778e+06	MS/MS	STY:79.9663@ES(0.0581)PRPLQLPGAEGPAIS(0.9419)DGEEGGGEPGAGGGAAGAAGAGR;
ESSANNSVSPSESLR	ESSANNSVSPSES[79.9663]LR	R	A	195	209	15	2	13S(79.9663)	sp|Q04726|TLE3_HUMAN	Q04726	TLE3_HUMAN	TLE3	Transducin-like enhancer protein 3			1	466904	MS/MS	STY:79.9663@ES(0.0162)S(0.0162)ANNS(0.0162)VS(0.0322)PS(0.0322)ES(0.8870)LR;
ESSANNSVSPSESLR	ESSANNSVS[79.9663]PSESLR	R	A	195	209	15	2	9S(79.9663)	sp|Q04726|TLE3_HUMAN	Q04726	TLE3_HUMAN	TLE3	Transducin-like enhancer protein 3			3	3.71934e+06	MS/MS	STY:79.9663@ES(0.0059)S(0.0059)ANNS(0.0059)VS(0.3274)PS(0.3274)ES(0.3274)LR;
ESSANNSVSPSESLR	ESSANNS[79.9663]VSPSESLR	R	A	195	209	15	2	7S(79.9663)	sp|Q04726|TLE3_HUMAN	Q04726	TLE3_HUMAN	TLE3	Transducin-like enhancer protein 3			1	3.71934e+06	MS/MS	STY:79.9663@ES(0.0045)S(0.0045)ANNS(0.2618)VS(0.2618)PS(0.2337)ES(0.2337)LR;
ESSPLYSPTFSDSTSAVK	ESSPLY[79.9663]SPTFSDSTSAVK	R	E	1791	1808	18	2	6Y(79.9663)	sp|P46821|MAP1B_HUMAN	P46821	MAP1B_HUMAN	MAP1B	Microtubule-associated protein 1B			1	0	MS/MS	STY:79.9663@ES(0.0052)S(0.0052)PLY(0.3225)S(0.3225)PT(0.3225)FS(0.0042)DS(0.0042)T(0.0042)S(0.0094)AVK;
ESSPIPSPTSDRK	ESS[79.9663]PIPS[79.9663]PTSDRK	K	A	2163	2175	13	2	3S(79.9663),7S(79.9663)	sp|Q01082|SPTB2_HUMAN	Q01082	SPTB2_HUMAN	SPTBN1	Spectrin beta chain, non-erythrocytic 1			1	2972696	MS/MS	STY:79.9663@ES(0.0728)S(0.6204)PIPS(0.6204)PT(0.6204)S(0.0659)DRK;
ESSPLYSPTFSDSTSAVK	ESS[79.9663]PLYSPTFSDSTSAVK	R	E	1791	1808	18	2	3S(79.9663)	sp|P46821|MAP1B_HUMAN	P46821	MAP1B_HUMAN	MAP1B	Microtubule-associated protein 1B			1	0	MS/MS	STY:79.9663@ES(0.0232)S(0.7641)PLY(0.0304)S(0.0304)PT(0.0304)FS(0.0304)DS(0.0304)T(0.0304)S(0.0304)AVK;
ESTESSNTTIEDEDVK	ESTESSNT[79.9663]TIEDEDVK	K	A	329	344	16	2	8T(79.9663)	sp|Q13557|KCC2D_HUMAN	Q13557	KCC2D_HUMAN	CAMK2D	Calcium/calmodulin-dependent protein kinase type II subunit delta			1	646728	MS/MS	STY:79.9663@ES(0.0105)T(0.0105)ES(0.0109)S(0.0114)NT(0.4783)T(0.4783)IEDEDVK;
ESTQLSPADLTEGKPTDPSK	ESTQLSPADLTEGKPTDPS[79.9663]K	R	L	451	470	20	3	19S(79.9663)	sp|Q08J23|NSUN2_HUMAN	Q08J23	NSUN2_HUMAN	NSUN2	RNA cytosine C(5)-methyltransferase NSUN2			3	3.30107e+06	MS/MS	STY:79.9663@ES(0.0223)T(0.0223)QLS(0.0290)PADLT(0.0290)EGKPT(0.0290)DPS(0.8686)K;
ESTQLSPADLTEGKPTDPSK	ESTQLSPADLTEGKPT[79.9663]DPSK	R	L	451	470	20	3	16T(79.9663)	sp|Q08J23|NSUN2_HUMAN	Q08J23	NSUN2_HUMAN	NSUN2	RNA cytosine C(5)-methyltransferase NSUN2			3	3.30107e+06	MS/MS	STY:79.9663@ES(0.0100)T(0.0100)QLS(0.0100)PADLT(0.0114)EGKPT(0.4793)DPS(0.4793)K;
ESTQLSPADLTEGKPTDPSK	ESTQLSPADLT[79.9663]EGKPTDPSK	R	L	451	470	20	3	11T(79.9663)	sp|Q08J23|NSUN2_HUMAN	Q08J23	NSUN2_HUMAN	NSUN2	RNA cytosine C(5)-methyltransferase NSUN2			1	3.44724e+06	MS/MS	STY:79.9663@ES(0.0110)T(0.0110)QLS(0.0110)PADLT(0.4794)EGKPT(0.4794)DPS(0.0082)K;
ESTQLSPADLTEGKPTDPSK	ESTQLS[79.9663]PADLTEGKPTDPSK	R	L	451	470	20	3	6S(79.9663)	sp|Q08J23|NSUN2_HUMAN	Q08J23	NSUN2_HUMAN	NSUN2	RNA cytosine C(5)-methyltransferase NSUN2			4	3.44724e+06	MS/MS	STY:79.9663@ES(0.0118)T(0.0118)QLS(0.9296)PADLT(0.0210)EGKPT(0.0112)DPS(0.0145)K;
ESTESSNTTIEDEDVK	EST[79.9663]ESSNTTIEDEDVK	K	A	329	344	16	2	3T(79.9663)	sp|Q13557|KCC2D_HUMAN	Q13557	KCC2D_HUMAN	CAMK2D	Calcium/calmodulin-dependent protein kinase type II subunit delta			1	646728	MS/MS	STY:79.9663@ES(0.0052)T(0.1990)ES(0.1990)S(0.1990)NT(0.1990)T(0.1990)IEDEDVK;
ESVASMGADSGDDFASDGSSSR	ESVASMGADSGDDFAS[79.9663]DGSSSR	K	E	32	53	22	2	16S(79.9663)	sp|Q92805|GOGA1_HUMAN	Q92805	GOGA1_HUMAN	GOLGA1	Golgin subfamily A member 1			1	0	MS/MS	STY:79.9663@ES(0.0052)VAS(0.0052)MGADS(0.0054)GDDFAS(0.2460)DGS(0.2460)S(0.2460)S(0.2460)R;
ESVPEFPLSPPK	ESVPEFPLS[79.9663]PPK	K	K	30	41	12	2	9S(79.9663)	sp|P16949|STMN1_HUMAN	P16949	STMN1_HUMAN	STMN1	Stathmin			10	2.002539E7	MS/MS	STY:79.9663@ES(0.0534)VPEFPLS(0.9466)PPK;
ESVSPEDSEK	ESVS[79.9663]PEDSEK	K	K	365	374	10	2	4S(79.9663)	sp|P35251|RFC1_HUMAN	P35251	RFC1_HUMAN	RFC1	Replication factor C subunit 1			1	737988	MS/MS	STY:79.9663@ES(0.0209)VS(0.4896)PEDS(0.4896)EK;
ESYDAPPTPSGAR	ESYDAPPTPS[79.9663]GAR	R	L	109	121	13	2	10S(79.9663)	sp|Q96S55|WRIP1_HUMAN	Q96S55	WRIP1_HUMAN	WRNIP1	ATPase WRNIP1			1	839881	MS/MS	STY:79.9663@ES(0.0209)Y(0.0209)DAPPT(0.0209)PS(0.9373)GAR;
ESYDAPPTPSGAR	ESYDAPPT[79.9663]PSGAR	R	L	109	121	13	2	8T(79.9663)	sp|Q96S55|WRIP1_HUMAN	Q96S55	WRIP1_HUMAN	WRNIP1	ATPase WRNIP1			1	324205	MS/MS	STY:79.9663@ES(0.1124)Y(0.1124)DAPPT(0.6817)PS(0.0935)GAR;
ESAAPASPAPSPAPSPTPAPPQK	ES[79.9663]AAPASPAPSPAPSPTPAPPQK	K	E	538	560	23	3	2S(79.9663)	sp|Q3KQU3|MA7D1_HUMAN	Q3KQU3	MA7D1_HUMAN	MAP7D1	MAP7 domain-containing protein 1			1	435378	MS/MS	STY:79.9663@ES(0.7724)AAPAS(0.0569)PAPS(0.0569)PAPS(0.0569)PT(0.0569)PAPPQK;
ESDQTLAALLSPK	ES[79.9663]DQTLAALLSPK	K	E	1687	1699	13	2	2S(79.9663)	sp|P18583|SON_HUMAN	P18583	SON_HUMAN	SON	Protein SON			1	4411933	MS/MS	STY:79.9663@ES(0.3333)DQT(0.3333)LAALLS(0.3333)PK;
ESEDKPEIEDVGSDEEEEK	ES[79.9663]EDKPEIEDVGSDEEEEK	K	K	251	269	19	2,3	2S(79.9663)	sp|P07900|HS90A_HUMAN	P07900	HS90A_HUMAN	HSP90AA1	Heat shock protein HSP 90-alpha			10	1.46896192E8	MS/MS	STY:79.9663@ES(0.9013)EDKPEIEDVGS(0.0987)DEEEEK;
ESEDKPEIEDVGSDEEEEKK	ES[79.9663]EDKPEIEDVGSDEEEEKK	K	D	251	270	20	3	2S(79.9663)	sp|P07900|HS90A_HUMAN	P07900	HS90A_HUMAN	HSP90AA1	Heat shock protein HSP 90-alpha			11	3.2241008E7	MS/MS	STY:79.9663@ES(0.9383)EDKPEIEDVGS(0.0617)DEEEEKK;
ESEGEEEDEDEDLSK	ES[79.9663]EGEEEDEDEDLSK	K	Y	152	166	15	2	2S(79.9663)	sp|O95218|ZRAB2_HUMAN	O95218	ZRAB2_HUMAN	ZRANB2	Zinc finger Ran-binding domain-containing protein 2			1	550376	MS/MS	STY:79.9663@ES(0.5000)EGEEEDEDEDLS(0.5000)K;
ESEQESEEEILAQK	ES[79.9663]EQESEEEILAQK	K	K	222	235	14	2	2S(79.9663)	sp|Q9BW71|HIRP3_HUMAN	Q9BW71	HIRP3_HUMAN	HIRIP3	HIRA-interacting protein 3			3	5.04749e+06	MS/MS	STY:79.9663@ES(0.9200)EQES(0.0800)EEEILAQK;
ESGVAGDPWKEETDTDLEVVLEK	ES[79.9663]GVAGDPWKEETDTDLEVVLEK	K	K	296	318	23	3	2S(79.9663)	sp|Q1ED39|KNOP1_HUMAN	Q1ED39	KNOP1_HUMAN	KNOP1	Lysine-rich nucleolar protein 1			1	351536	MS/MS	STY:79.9663@ES(0.5409)GVAGDPWKEET(0.2295)DT(0.2295)DLEVVLEK;
ESLKEEDESDDDNM	ES[79.9663]LKEEDESDDDNM	K	-	242	255	14	2	2S(79.9663)	sp|P25788|PSA3_HUMAN	P25788	PSA3_HUMAN	PSMA3	Proteasome subunit alpha type-3			5	4.5557992E7	MS/MS	STY:79.9663@ES(0.9193)LKEEDES(0.0807)DDDNM;
ESLKEEDESDDDNM	ES[79.9663]LKEEDESDDDNM[15.9949]	K	-	242	255	14	2	14M(15.9949),2S(79.9663)	sp|P25788|PSA3_HUMAN	P25788	PSA3_HUMAN	PSMA3	Proteasome subunit alpha type-3			12	6432731	MS/MS	STY:79.9663@ES(0.9322)LKEEDES(0.0678)DDDNM;M:15.9949@ESLKEEDESDDDNM(1.0000);
ESSDDDTPFDGSNYLADK	ES[79.9663]SDDDTPFDGSNYLADK	K	V	1097	1114	18	2	2S(79.9663)	sp|Q7Z401|MYCPP_HUMAN	Q7Z401	MYCPP_HUMAN	DENND4A	C-myc promoter-binding protein			1	0	MS/MS	STY:79.9663@ES(0.4750)S(0.4750)DDDT(0.0298)PFDGS(0.0101)NY(0.0101)LADK;
ESSIIAPAPAEDVDTPPR	ES[79.9663]SIIAPAPAEDVDTPPR	K	K	473	490	18	2	2S(79.9663)	sp|Q15910|EZH2_HUMAN	Q15910	EZH2_HUMAN	EZH2	Histone-lysine N-methyltransferase EZH2			1	615551	MS/MS	STY:79.9663@ES(0.4736)S(0.4736)IIAPAPAEDVDT(0.0528)PPR;
ESSPIPSPTSDR	ES[79.9663]SPIPSPTSDR	K	K	2163	2174	12	2	2S(79.9663)	sp|Q01082|SPTB2_HUMAN	Q01082	SPTB2_HUMAN	SPTBN1	Spectrin beta chain, non-erythrocytic 1			2	1.06784e+06	MS/MS	STY:79.9663@ES(0.4856)S(0.4856)PIPS(0.0096)PT(0.0096)S(0.0096)DR;
ESSPIPSPTSDR	ES[79.9663]SPIPS[79.9663]PTSDR	K	K	2163	2174	12	2	2S(79.9663),7S(79.9663)	sp|Q01082|SPTB2_HUMAN	Q01082	SPTB2_HUMAN	SPTBN1	Spectrin beta chain, non-erythrocytic 1			1	2.71845e+06	MS/MS	STY:79.9663@ES(0.4947)S(0.1668)PIPS(0.4462)PT(0.4462)S(0.4462)DR;
ESSPIPSPTSDRK	ES[79.9663]SPIPS[79.9663]PTSDRK	K	A	2163	2175	13	2	2S(79.9663),7S(79.9663)	sp|Q01082|SPTB2_HUMAN	Q01082	SPTB2_HUMAN	SPTBN1	Spectrin beta chain, non-erythrocytic 1			1	2972696	MS/MS	STY:79.9663@ES(0.6226)S(0.6226)PIPS(0.7005)PT(0.0272)S(0.0272)DRK;
ESSPLYSPTFSDSTSAVK	ES[79.9663]SPLYSPTFSDSTSAVK	R	E	1791	1808	18	2	2S(79.9663)	sp|P46821|MAP1B_HUMAN	P46821	MAP1B_HUMAN	MAP1B	Microtubule-associated protein 1B			2	3.54827e+06	MS/MS	STY:79.9663@ES(0.4622)S(0.4622)PLY(0.0108)S(0.0108)PT(0.0108)FS(0.0108)DS(0.0108)T(0.0108)S(0.0108)AVK;
ESSPIPSPTSDR	ES[79.9663]S[79.9663]PIPSPTSDR	K	K	2163	2174	12	2	2S(79.9663),3S(79.9663)	sp|Q01082|SPTB2_HUMAN	Q01082	SPTB2_HUMAN	SPTBN1	Spectrin beta chain, non-erythrocytic 1			5	3.56687e+06	MS/MS	STY:79.9663@ES(0.9386)S(0.9386)PIPS(0.0410)PT(0.0410)S(0.0410)DR;
ESSPIPSPTSDRK	ES[79.9663]S[79.9663]PIPSPTSDRK	K	A	2163	2175	13	2	2S(79.9663),3S(79.9663)	sp|Q01082|SPTB2_HUMAN	Q01082	SPTB2_HUMAN	SPTBN1	Spectrin beta chain, non-erythrocytic 1			3	2972696	MS/MS	STY:79.9663@ES(0.4000)S(0.4000)PIPS(0.4000)PT(0.4000)S(0.4000)DRK;
ESTQLSPADLTEGKPTDPSK	ES[79.9663]TQLSPADLTEGKPTDPSK	R	L	451	470	20	3	2S(79.9663)	sp|Q08J23|NSUN2_HUMAN	Q08J23	NSUN2_HUMAN	NSUN2	RNA cytosine C(5)-methyltransferase NSUN2			4	3352412	MS/MS	STY:79.9663@ES(0.4650)T(0.4650)QLS(0.0428)PADLT(0.0092)EGKPT(0.0090)DPS(0.0090)K;
ESVPEFPLSPPK	ES[79.9663]VPEFPLSPPK	K	K	30	41	12	2	2S(79.9663)	sp|P16949|STMN1_HUMAN	P16949	STMN1_HUMAN	STMN1	Stathmin			4	2.002539E7	MS/MS	STY:79.9663@ES(0.9334)VPEFPLS(0.0666)PPK;
ETDEDEDDVDSVEEMEVTATNDGAATDGVCPQPEPSDPDAQTIK	ETDEDEDDVDSVEEMEVTATNDGAAT[79.9663]DGVC[57.0215]PQPEPSDPDAQTIK	R	E	132	175	44	4	26T(79.9663),30C(57.0215)	sp|Q969E8|TSR2_HUMAN	Q969E8	TSR2_HUMAN	TSR2	Pre-rRNA-processing protein TSR2 homolog			1	0	MS/MS	STY:79.9663@ET(0.1202)DEDEDDVDS(0.1202)VEEMEVT(0.1202)AT(0.1975)NDGAAT(0.4177)DGVCPQPEPS(0.0159)DPDAQT(0.0083)IK;
ETEAAPTSPPIVPLK	ETEAAPTS[79.9663]PPIVPLK	R	S	1075	1089	15	2	8S(79.9663)	sp|Q7Z3B3|KANL1_HUMAN	Q7Z3B3	KANL1_HUMAN	KANSL1	KAT8 regulatory NSL complex subunit 1			1	0	MS/MS	STY:79.9663@ET(0.0409)EAAPT(0.0409)S(0.9181)PPIVPLK;
ETEEQDSDSAEQGDPAGEGK	ETEEQDSDS[79.9663]AEQGDPAGEGK	R	E	54	73	20	2	9S(79.9663)	sp|O95361|TRI16_HUMAN	O95361	TRI16_HUMAN	TRIM16	Tripartite motif-containing protein 16			1	2.63107e+06	MS/MS	STY:79.9663@ET(0.0530)EEQDS(0.0530)DS(0.8940)AEQGDPAGEGK;
ETEEQDSDSAEQGDPAGEGK	ETEEQDS[79.9663]DSAEQGDPAGEGK	R	E	54	73	20	3	7S(79.9663)	sp|O95361|TRI16_HUMAN	O95361	TRI16_HUMAN	TRIM16	Tripartite motif-containing protein 16			1	585092	MS/MS	STY:79.9663@ET(0.1478)EEQDS(0.6274)DS(0.2248)AEQGDPAGEGK;
ETESAPGSPR	ETESAPGS[79.9663]PR	K	A	514	523	10	2	8S(79.9663)	sp|Q6PKG0|LARP1_HUMAN	Q6PKG0	LARP1_HUMAN	LARP1	La-related protein 1			2	442855	MS/MS	STY:79.9663@ET(0.0359)ES(0.0359)APGS(0.9282)PR;
ETESAPGSPR	ETES[79.9663]APGSPR	K	A	514	523	10	2	4S(79.9663)	sp|Q6PKG0|LARP1_HUMAN	Q6PKG0	LARP1_HUMAN	LARP1	La-related protein 1			1	1.0214e+06	MS/MS	STY:79.9663@ET(0.0437)ES(0.9277)APGS(0.0286)PR;
ETESEAEDNLDDLEK	ETES[79.9663]EAEDNLDDLEK	K	H	871	885	15	2	4S(79.9663)	sp|Q8IYB3|SRRM1_HUMAN	Q8IYB3	SRRM1_HUMAN	SRRM1	Serine/arginine repetitive matrix protein 1			1	666036	MS/MS	STY:79.9663@ET(0.1805)ES(0.8195)EAEDNLDDLEK;
ETFSSAEGTVDK	ETFS[79.9663]SAEGTVDK	R	D	886	897	12	2	4S(79.9663)	sp|P46100|ATRX_HUMAN	P46100	ATRX_HUMAN	ATRX	Transcriptional regulator ATRX			1	1.49038e+06	MS/MS	STY:79.9663@ET(0.0146)FS(0.3285)S(0.3285)AEGT(0.3285)VDK;
ETPAATEAPSSTPK	ETPAATEAPSST[79.9663]PK	K	A	185	198	14	2	12T(79.9663)	sp|P80723|BASP1_HUMAN	P80723	BASP1_HUMAN	BASP1	Brain acid soluble protein 1			1	2.46275e+06	MS/MS	STY:79.9663@ET(0.0306)PAAT(0.0157)EAPS(0.0364)S(0.0364)T(0.8808)PK;
ETPAATEAPSSTPK	ETPAATEAPSS[79.9663]TPK	K	A	185	198	14	2	11S(79.9663)	sp|P80723|BASP1_HUMAN	P80723	BASP1_HUMAN	BASP1	Brain acid soluble protein 1			1	2.5076248E7	MS/MS	STY:79.9663@ET(0.0155)PAAT(0.0135)EAPS(0.0681)S(0.8840)T(0.0188)PK;
ETPAATEAPSSTPK	ETPAATEAPS[79.9663]STPK	K	A	185	198	14	2	10S(79.9663)	sp|P80723|BASP1_HUMAN	P80723	BASP1_HUMAN	BASP1	Brain acid soluble protein 1			6	2.5076248E7	MS/MS	STY:79.9663@ET(0.0634)PAAT(0.1018)EAPS(0.6032)S(0.1158)T(0.1158)PK;
ETPAATEAPSSTPK	ETPAAT[79.9663]EAPSSTPK	K	A	185	198	14	2	6T(79.9663)	sp|P80723|BASP1_HUMAN	P80723	BASP1_HUMAN	BASP1	Brain acid soluble protein 1			4	2.5076248E7	MS/MS	STY:79.9663@ET(0.0049)PAAT(0.2488)EAPS(0.2488)S(0.2488)T(0.2488)PK;
ETPHSPGVEDAPIAK	ETPHS[79.9663]PGVEDAPIAK	R	V	486	500	15	2,3	5S(79.9663)	sp|Q9UHB6|LIMA1_HUMAN	Q9UHB6	LIMA1_HUMAN	LIMA1	LIM domain and actin-binding protein 1			7	4629037	MS/MS	STY:79.9663@ET(0.0569)PHS(0.9431)PGVEDAPIAK;
ETQSPEQVK	ETQS[79.9663]PEQVK	K	S	493	501	9	2	4S(79.9663)	sp|Q9NYF8|BCLF1_HUMAN	Q9NYF8	BCLF1_HUMAN	BCLAF1	Bcl-2-associated transcription factor 1			2	3.6866e+06	MS/MS	STY:79.9663@ET(0.0540)QS(0.9460)PEQVK;
ETVQTTQSPTPVEK	ETVQTTQS[79.9663]PTPVEK	K	E	610	623	14	2	8S(79.9663)	sp|Q9UPN6|SCAF8_HUMAN	Q9UPN6	SCAF8_HUMAN	SCAF8	SR-related and CTD-associated factor 8			1	5.83308e+06	MS/MS	STY:79.9663@ET(0.0097)VQT(0.0097)T(0.0105)QS(0.4851)PT(0.4851)PVEK;
ETVQTTQSPTPVEK	ETVQTT[79.9663]QSPTPVEK	K	E	610	623	14	2	6T(79.9663)	sp|Q9UPN6|SCAF8_HUMAN	Q9UPN6	SCAF8_HUMAN	SCAF8	SR-related and CTD-associated factor 8			1	5.83308e+06	MS/MS	STY:79.9663@ET(0.0297)VQT(0.0151)T(0.3184)QS(0.3184)PT(0.3184)PVEK;
ETVQTTQSPTPVEK	ETVQT[79.9663]TQSPTPVEK	K	E	610	623	14	2	5T(79.9663)	sp|Q9UPN6|SCAF8_HUMAN	Q9UPN6	SCAF8_HUMAN	SCAF8	SR-related and CTD-associated factor 8			1	1.71845e+06	MS/MS	STY:79.9663@ET(0.0085)VQT(0.2479)T(0.2479)QS(0.2479)PT(0.2479)PVEK;
ETEEQDSDSAEQGDPAGEGK	ET[79.9663]EEQDSDSAEQGDPAGEGK	R	E	54	73	20	2,3	2T(79.9663)	sp|O95361|TRI16_HUMAN	O95361	TRI16_HUMAN	TRIM16	Tripartite motif-containing protein 16			6	3.21616e+06	MS/MS	STY:79.9663@ET(0.9068)EEQDS(0.0466)DS(0.0466)AEQGDPAGEGK;
ETERASPIK	ET[79.9663]ERASPIK	K	M	353	361	9	2	2T(79.9663)	sp|P27816|MAP4_HUMAN	P27816	MAP4_HUMAN	MAP4	Microtubule-associated protein 4			1	337095	MS/MS	STY:79.9663@ET(0.5000)ERAS(0.5000)PIK;
ETESAPGSPR	ET[79.9663]ESAPGSPR	K	A	514	523	10	2	2T(79.9663)	sp|Q6PKG0|LARP1_HUMAN	Q6PKG0	LARP1_HUMAN	LARP1	La-related protein 1			2	1.13434e+06	MS/MS	STY:79.9663@ET(0.3845)ES(0.3845)APGS(0.2310)PR;
ETESEAEDNLDDLEK	ET[79.9663]ESEAEDNLDDLEK	K	H	871	885	15	2	2T(79.9663)	sp|Q8IYB3|SRRM1_HUMAN	Q8IYB3	SRRM1_HUMAN	SRRM1	Serine/arginine repetitive matrix protein 1			3	1.08937e+06	MS/MS	STY:79.9663@ET(0.5000)ES(0.5000)EAEDNLDDLEK;
ETFSSAEGTVDK	ET[79.9663]FSSAEGTVDK	R	D	886	897	12	2	2T(79.9663)	sp|P46100|ATRX_HUMAN	P46100	ATRX_HUMAN	ATRX	Transcriptional regulator ATRX			1	1.49038e+06	MS/MS	STY:79.9663@ET(0.3186)FS(0.3186)S(0.3186)AEGT(0.0443)VDK;
ETPAATEAPSSTPK	ET[79.9663]PAATEAPSSTPK	K	A	185	198	14	2	2T(79.9663)	sp|P80723|BASP1_HUMAN	P80723	BASP1_HUMAN	BASP1	Brain acid soluble protein 1			6	2.6596368E7	MS/MS	STY:79.9663@ET(0.8964)PAAT(0.0259)EAPS(0.0259)S(0.0259)T(0.0259)PK;
ETPHSPGVEDAPIAK	ET[79.9663]PHSPGVEDAPIAK	R	V	486	500	15	2,3	2T(79.9663)	sp|Q9UHB6|LIMA1_HUMAN	Q9UHB6	LIMA1_HUMAN	LIMA1	LIM domain and actin-binding protein 1			18	4.69119e+06	MS/MS	STY:79.9663@ET(0.5000)PHS(0.5000)PGVEDAPIAK;
ETQSPEQVK	ET[79.9663]QSPEQVK	K	S	493	501	9	2	2T(79.9663)	sp|Q9NYF8|BCLF1_HUMAN	Q9NYF8	BCLF1_HUMAN	BCLAF1	Bcl-2-associated transcription factor 1			8	5564138	MS/MS	STY:79.9663@ET(0.7565)QS(0.2435)PEQVK;
ETVQTTQSPTPVEK	ET[79.9663]VQTTQSPTPVEK	K	E	610	623	14	2	2T(79.9663)	sp|Q9UPN6|SCAF8_HUMAN	Q9UPN6	SCAF8_HUMAN	SCAF8	SR-related and CTD-associated factor 8			1	5.83308e+06	MS/MS	STY:79.9663@ET(0.2486)VQT(0.2486)T(0.2486)QS(0.2486)PT(0.0054)PVEK;
EVAATEEDVTRLPSPTSPFSSLSQDQAATSK	EVAATEEDVTRLPS[79.9663]PTSPFSSLSQDQAATSK	K	A	975	1005	31	3	14S(79.9663)	sp|Q8WWI1|LMO7_HUMAN	Q8WWI1	LMO7_HUMAN	LMO7	LIM domain only protein 7			1	3.27306e+06	MS/MS	STY:79.9663@EVAAT(0.0169)EEDVT(0.0069)RLPS(0.7608)PT(0.0078)S(0.1021)PFS(0.0257)S(0.0257)LS(0.0257)QDQAAT(0.0143)S(0.0143)K;
EVAENQQNQSSDPEEEK	EVAENQQNQS[79.9663]SDPEEEK	K	G	29	45	17	2	10S(79.9663)	sp|O43491|E41L2_HUMAN	O43491	E41L2_HUMAN	EPB41L2	Band 4.1-like protein 2			2	2.24764e+06	MS/MS	STY:79.9663@EVAENQQNQS(0.5000)S(0.5000)DPEEEK;
EVDEDSEPER	EVDEDS[79.9663]EPER	R	E	77	86	10	2	6S(79.9663)	sp|Q53GS9|UBP39_HUMAN	Q53GS9	UBP39_HUMAN	USP39	Ubiquitin carboxyl-terminal hydrolase 39			1	1.82174e+06	MS/MS	STY:79.9663@EVDEDS(1.0000)EPER;
EVDGLLTSEPMGSPVSSK	EVDGLLTSEPMGSPVS[79.9663]SK	K	T	582	599	18	2	16S(79.9663)	sp|Q8WWM7|ATX2L_HUMAN	Q8WWM7	ATX2L_HUMAN	ATXN2L	Ataxin-2-like protein			1	5410128	MS/MS	STY:79.9663@EVDGLLT(0.0108)S(0.0108)EPMGS(0.0159)PVS(0.4813)S(0.4813)K;
EVDGLLTSEPMGSPVSSK	EVDGLLTSEPMGS[79.9663]PVSSK	K	T	582	599	18	2	13S(79.9663)	sp|Q8WWM7|ATX2L_HUMAN	Q8WWM7	ATX2L_HUMAN	ATXN2L	Ataxin-2-like protein			1	5410128	MS/MS	STY:79.9663@EVDGLLT(0.0139)S(0.0139)EPMGS(0.9442)PVS(0.0139)S(0.0139)K;
EVDGLLTSEPMGSPVSSK	EVDGLLTSEPM[15.9949]GS[79.9663]PVSSK	K	T	582	599	18	2	11M(15.9949),13S(79.9663)	sp|Q8WWM7|ATX2L_HUMAN	Q8WWM7	ATX2L_HUMAN	ATXN2L	Ataxin-2-like protein			1	1.81112e+06	MS/MS	STY:79.9663@EVDGLLT(0.2048)S(0.0211)EPMGS(0.2580)PVS(0.2580)S(0.2580)K;M:15.9949@EVDGLLTSEPM(1.0000)GSPVSSK;
EVDGLLTSEPMGSPVSSK	EVDGLLT[79.9663]SEPMGSPVSSK	K	T	582	599	18	2	7T(79.9663)	sp|Q8WWM7|ATX2L_HUMAN	Q8WWM7	ATX2L_HUMAN	ATXN2L	Ataxin-2-like protein			2	5410128	MS/MS	STY:79.9663@EVDGLLT(0.3224)S(0.3224)EPMGS(0.3224)PVS(0.0164)S(0.0164)K;
EVDGLLTSEPMGSPVSSK	EVDGLLT[79.9663]SEPM[15.9949]GSPVSSK	K	T	582	599	18	2	11M(15.9949),7T(79.9663)	sp|Q8WWM7|ATX2L_HUMAN	Q8WWM7	ATX2L_HUMAN	ATXN2L	Ataxin-2-like protein			1	1.81112e+06	MS/MS	STY:79.9663@EVDGLLT(0.3141)S(0.3141)EPMGS(0.3141)PVS(0.0288)S(0.0288)K;M:15.9949@EVDGLLTSEPM(1.0000)GSPVSSK;
EVDPSTGELQSLQMPESEGPSSLDPSQEGPTGLK	EVDPSTGELQSLQMPESEGPSSLDPSQEGPT[79.9663]GLK	K	E	345	378	34	3	31T(79.9663)	sp|Q13501|SQSTM_HUMAN	Q13501	SQSTM_HUMAN	SQSTM1	Sequestosome-1			3	4.9346112E7	MS/MS	STY:79.9663@EVDPS(0.0172)T(0.0172)GELQS(0.0114)LQMPES(0.0121)EGPS(0.0134)S(0.0134)LDPS(0.0134)QEGPT(0.9017)GLK;
EVDPSTGELQSLQMPESEGPSSLDPSQEGPTGLK	EVDPSTGELQSLQMPESEGPS[79.9663]SLDPSQEGPTGLK	K	E	345	378	34	3	21S(79.9663)	sp|Q13501|SQSTM_HUMAN	Q13501	SQSTM_HUMAN	SQSTM1	Sequestosome-1			2	5.0161672E7	MS/MS	STY:79.9663@EVDPS(0.0507)T(0.0507)GELQS(0.1271)LQMPES(0.0081)EGPS(0.3760)S(0.3760)LDPS(0.0051)QEGPT(0.0062)GLK;
EVDPSTGELQSLQMPESEGPSSLDPSQEGPTGLK	EVDPSTGELQSLQMPESEGPS[79.9663]S[79.9663]LDPSQEGPTGLK	K	E	345	378	34	3	21S(79.9663),22S(79.9663)	sp|Q13501|SQSTM_HUMAN	Q13501	SQSTM_HUMAN	SQSTM1	Sequestosome-1			1	3.2245e+06	MS/MS	STY:79.9663@EVDPS(0.0238)T(0.0238)GELQS(0.0238)LQMPES(0.0238)EGPS(0.9084)S(0.9084)LDPS(0.0491)QEGPT(0.0387)GLK;
EVDPSTGELQSLQMPESEGPSSLDPSQEGPTGLK	EVDPSTGELQSLQMPES[79.9663]EGPSSLDPSQEGPTGLK	K	E	345	378	34	3,4	17S(79.9663)	sp|Q13501|SQSTM_HUMAN	Q13501	SQSTM_HUMAN	SQSTM1	Sequestosome-1			3	5.0161672E7	MS/MS	STY:79.9663@EVDPS(0.0116)T(0.0116)GELQS(0.0116)LQMPES(0.3161)EGPS(0.3161)S(0.3161)LDPS(0.0123)QEGPT(0.0046)GLK;
EVDPSTGELQSLQMPESEGPSSLDPSQEGPTGLK	EVDPSTGELQSLQM[15.9949]PESEGPS[79.9663]SLDPSQEGPTGLK	K	E	345	378	34	3	14M(15.9949),21S(79.9663)	sp|Q13501|SQSTM_HUMAN	Q13501	SQSTM_HUMAN	SQSTM1	Sequestosome-1			1	0	MS/MS	STY:79.9663@EVDPS(0.0060)T(0.0060)GELQS(0.0036)LQMPES(0.0088)EGPS(0.2439)S(0.2439)LDPS(0.2439)QEGPT(0.2439)GLK;M:15.9949@EVDPSTGELQSLQM(1.0000)PESEGPSSLDPSQEGPTGLK;
EVDPSTGELQSLQMPESEGPSSLDPSQEGPTGLK	EVDPSTGELQSLQM[15.9949]PES[79.9663]EGPSSLDPSQEGPTGLK	K	E	345	378	34	3	14M(15.9949),17S(79.9663)	sp|Q13501|SQSTM_HUMAN	Q13501	SQSTM_HUMAN	SQSTM1	Sequestosome-1			1	0	MS/MS	STY:79.9663@EVDPS(0.0097)T(0.0097)GELQS(0.0097)LQMPES(0.9316)EGPS(0.0117)S(0.0117)LDPS(0.0080)QEGPT(0.0080)GLK;M:15.9949@EVDPSTGELQSLQM(1.0000)PESEGPSSLDPSQEGPTGLK;
EVDPSTGELQSLQMPESEGPSSLDPSQEGPTGLK	EVDPS[79.9663]TGELQSLQMPESEGPSSLDPSQEGPTGLK	K	E	345	378	34	3	5S(79.9663)	sp|Q13501|SQSTM_HUMAN	Q13501	SQSTM_HUMAN	SQSTM1	Sequestosome-1			2	9.9507784E7	MS/MS	STY:79.9663@EVDPS(0.4371)T(0.4371)GELQS(0.0115)LQMPES(0.0195)EGPS(0.0136)S(0.0136)LDPS(0.0121)QEGPT(0.0553)GLK;
EVDPSTGELQSLQMPESEGPSSLDPSQEGPTGLK	EVDPS[79.9663]T[79.9663]GELQSLQMPESEGPSSLDPSQEGPTGLK	K	E	345	378	34	3	5S(79.9663),6T(79.9663)	sp|Q13501|SQSTM_HUMAN	Q13501	SQSTM_HUMAN	SQSTM1	Sequestosome-1			1	613983	MS/MS	STY:79.9663@EVDPS(0.2846)T(0.2846)GELQS(0.2846)LQMPES(0.2846)EGPS(0.2846)S(0.2846)LDPS(0.2846)QEGPT(0.0077)GLK;
EVDQDDEENSEEDEMDSGTMVR	EVDQDDEENS[79.9663]EEDEMDSGTMVR	R	A	311	332	22	3	10S(79.9663)	sp|Q13043|STK4_HUMAN	Q13043	STK4_HUMAN	STK4	Serine/threonine-protein kinase 4			1	0	MS/MS	STY:79.9663@EVDQDDEENS(0.8733)EEDEMDS(0.0633)GT(0.0633)MVR;
EVDYSDSLTEK	EVDY[79.9663]SDSLTEK	K	Q	1376	1386	11	2	4Y(79.9663)	sp|P51532|SMCA4_HUMAN	P51532	SMCA4_HUMAN	SMARCA4	Transcription activator BRG1			2	3454690	MS/MS	STY:79.9663@EVDY(0.4874)S(0.4874)DS(0.0126)LT(0.0126)EK;
EVEDKESEGEEEDEDEDLSK	EVEDKESEGEEEDEDEDLS[79.9663]K	K	Y	147	166	20	2,3	19S(79.9663)	sp|O95218|ZRAB2_HUMAN	O95218	ZRAB2_HUMAN	ZRANB2	Zinc finger Ran-binding domain-containing protein 2			5	1.850012E7	MS/MS	STY:79.9663@EVEDKES(0.1006)EGEEEDEDEDLS(0.8994)K;
EVEDKESEGEEEDEDEDLSK	EVEDKES[79.9663]EGEEEDEDEDLSK	K	Y	147	166	20	2,3	7S(79.9663)	sp|O95218|ZRAB2_HUMAN	O95218	ZRAB2_HUMAN	ZRANB2	Zinc finger Ran-binding domain-containing protein 2			36	4.0330776E7	MS/MS	STY:79.9663@EVEDKES(0.9456)EGEEEDEDEDLS(0.0544)K;
EVEEDSEDEEMSEDEEDDSSGEEVVIPQK	EVEEDSEDEEMS[79.9663]EDEEDDSSGEEVVIPQK	K	K	23	51	29	3	12S(79.9663)	sp|P19338|NUCL_HUMAN	P19338	NUCL_HUMAN	NCL	Nucleolin			1	494508	MS/MS	STY:79.9663@EVEEDS(0.0826)EDEEMS(0.4363)EDEEDDS(0.4363)S(0.0449)GEEVVIPQK;
EVEEDSEDEEMSEDEEDDSSGEEVVIPQK	EVEEDS[79.9663]EDEEMSEDEEDDSSGEEVVIPQK	K	K	23	51	29	3	6S(79.9663)	sp|P19338|NUCL_HUMAN	P19338	NUCL_HUMAN	NCL	Nucleolin			1	267952	MS/MS	STY:79.9663@EVEEDS(0.2500)EDEEMS(0.2500)EDEEDDS(0.2500)S(0.2500)GEEVVIPQK;
EVEEDSEDEEMSEDEEDDSSGEEVVIPQK	EVEEDS[79.9663]EDEEMS[79.9663]EDEEDDSSGEEVVIPQK	K	K	23	51	29	3	12S(79.9663),6S(79.9663)	sp|P19338|NUCL_HUMAN	P19338	NUCL_HUMAN	NCL	Nucleolin			1	1.095e+06	MS/MS	STY:79.9663@EVEEDS(0.5017)EDEEMS(0.5017)EDEEDDS(0.4983)S(0.4983)GEEVVIPQK;
EVENEDEDDDDSDK	EVENEDEDDDDS[79.9663]DK	K	E	31	44	14	2	12S(79.9663)	sp|Q9P287|BCCIP_HUMAN	Q9P287	BCCIP_HUMAN	BCCIP	BRCA2 and CDKN1A-interacting protein			6	2.88155e+06	MS/MS	STY:79.9663@EVENEDEDDDDS(1.0000)DK;
EVENEDEDDDDSDKEK	EVENEDEDDDDS[79.9663]DKEK	K	D	31	46	16	2	12S(79.9663)	sp|Q9P287|BCCIP_HUMAN	Q9P287	BCCIP_HUMAN	BCCIP	BRCA2 and CDKN1A-interacting protein			1	247797	MS/MS	STY:79.9663@EVENEDEDDDDS(1.0000)DKEK;
EVIEIEDASPTK	EVIEIEDASPT[79.9663]K	R	C	1519	1530	12	2	11T(79.9663)	sp|P46100|ATRX_HUMAN	P46100	ATRX_HUMAN	ATRX	Transcriptional regulator ATRX			1	648955	MS/MS	STY:79.9663@EVIEIEDAS(0.0803)PT(0.9197)K;
EVIEIEDASPTK	EVIEIEDAS[79.9663]PTK	R	C	1519	1530	12	2	9S(79.9663)	sp|P46100|ATRX_HUMAN	P46100	ATRX_HUMAN	ATRX	Transcriptional regulator ATRX			2	1311027	MS/MS	STY:79.9663@EVIEIEDAS(0.5000)PT(0.5000)K;
EVLDEDTDEEK	EVLDEDT[79.9663]DEEK	K	E	990	1000	11	2	7T(79.9663)	sp|Q9Y3P9|RBGP1_HUMAN	Q9Y3P9	RBGP1_HUMAN	RABGAP1	Rab GTPase-activating protein 1			2	1.14962e+06	MS/MS	STY:79.9663@EVLDEDT(1.0000)DEEK;
EVPPPPAEESEEEDDDGLPK	EVPPPPAEES[79.9663]EEEDDDGLPK	K	K	353	372	20	2,3	10S(79.9663)	sp|Q9H6X2|ANTR1_HUMAN	Q9H6X2	ANTR1_HUMAN	ANTXR1	Anthrax toxin receptor 1			8	6.23155e+06	MS/MS	STY:79.9663@EVPPPPAEES(1.0000)EEEDDDGLPK;
EVQAEQPSSSSPR	EVQAEQPS[79.9663]SSSPR	R	R	178	190	13	2	8S(79.9663)	sp|Q9Y388|RBMX2_HUMAN	Q9Y388	RBMX2_HUMAN	RBMX2	RNA-binding motif protein, X-linked 2			6	1665243	MS/MS	STY:79.9663@EVQAEQPS(0.2500)S(0.2500)S(0.2500)S(0.2500)PR;
EVSDDEAEEK	EVS[79.9663]DDEAEEK	K	E	229	238	10	2	3S(79.9663)	sp|P07900|HS90A_HUMAN	P07900	HS90A_HUMAN	HSP90AA1	Heat shock protein HSP 90-alpha			97	1.52960352E8	MS/MS	STY:79.9663@EVS(1.0000)DDEAEEK;
EVSDSEAGGGPQGER	EVS[79.9663]DSEAGGGPQGER	R	K	368	382	15	2	3S(79.9663)	sp|Q9BW71|HIRP3_HUMAN	Q9BW71	HIRP3_HUMAN	HIRIP3	HIRA-interacting protein 3			4	2.10947e+06	MS/MS	STY:79.9663@EVS(0.8503)DS(0.1497)EAGGGPQGER;
EVSPEVVR	EVS[79.9663]PEVVR	K	S	196	203	8	2	3S(79.9663)	sp|Q5T200|ZC3HD_HUMAN	Q5T200	ZC3HD_HUMAN	ZC3H13	Zinc finger CCCH domain-containing protein 13			1	740730	MS/MS	STY:79.9663@EVS(1.0000)PEVVR;
EVSPSDVR	EVS[79.9663]PSDVR	R	E	1942	1949	8	2	3S(79.9663)	sp|Q8WYP5|ELYS_HUMAN	Q8WYP5	ELYS_HUMAN	AHCTF1	Protein ELYS			6	2479044	MS/MS	STY:79.9663@EVS(0.5000)PS(0.5000)DVR;
EVSSLEGSPPPCLGQEEAVCTK	EVS[79.9663]SLEGSPPPC[57.0215]LGQEEAVC[57.0215]TK	K	I	1388	1409	22	3	12C(57.0215),20C(57.0215),3S(79.9663)	sp|Q02952|AKA12_HUMAN	Q02952	AKA12_HUMAN	AKAP12	A-kinase anchor protein 12			2	733864	MS/MS	STY:79.9663@EVS(0.3253)S(0.3253)LEGS(0.3253)PPPCLGQEEAVCT(0.0241)K;
EVTPESGPPK	EVTPES[79.9663]GPPK	K	V	193	202	10	2	6S(79.9663)	sp|P46087|NOP2_HUMAN	P46087	NOP2_HUMAN	NOP2	28S rRNA (cytosine(4447)-C(5))-methyltransferase			1	3.68447e+06	MS/MS	STY:79.9663@EVT(0.1654)PES(0.8346)GPPK;
EVTPESGPPK	EVT[79.9663]PESGPPK	K	V	193	202	10	2	3T(79.9663)	sp|P46087|NOP2_HUMAN	P46087	NOP2_HUMAN	NOP2	28S rRNA (cytosine(4447)-C(5))-methyltransferase			5	4.21166e+06	MS/MS	STY:79.9663@EVT(0.9354)PES(0.0646)GPPK;
EVTPILAQTQSSGPQTSTTPQVLSPTITSPPNALPR	EVT[79.9663]PILAQTQSSGPQTSTTPQVLSPTITSPPNALPR	R	R	341	376	36	3	3T(79.9663)	sp|P30260|CDC27_HUMAN	P30260	CDC27_HUMAN	CDC27	Cell division cycle protein 27 homolog			1	1.8585e+06	MS/MS	STY:79.9663@EVT(0.3026)PILAQT(0.3026)QS(0.3026)S(0.0179)GPQT(0.0068)S(0.0068)T(0.0068)T(0.0068)PQVLS(0.0068)PT(0.0068)IT(0.0068)S(0.0271)PPNALPR;
EVYELLDSPGK	EVYELLDS[79.9663]PGK	K	V	20	30	11	2	8S(79.9663)	sp|P22234|PUR6_HUMAN	P22234	PUR6_HUMAN	PAICS	Bifunctional phosphoribosylaminoimidazole carboxylase/phosphoribosylaminoimidazole succinocarboxamide synthetase			2	1.44293e+06	MS/MS	STY:79.9663@EVY(0.0596)ELLDS(0.9404)PGK;
EVYELLDSPGK	EVY[79.9663]ELLDSPGK	K	V	20	30	11	2	3Y(79.9663)	sp|P22234|PUR6_HUMAN	P22234	PUR6_HUMAN	PAICS	Bifunctional phosphoribosylaminoimidazole carboxylase/phosphoribosylaminoimidazole succinocarboxamide synthetase			3	2.51744e+06	MS/MS	STY:79.9663@EVY(0.9103)ELLDS(0.0897)PGK;
EWNGVVSESDSPVK	EWNGVVSES[79.9663]DSPVK	K	R	41	54	14	2	9S(79.9663)	sp|P18858|DNLI1_HUMAN	P18858	DNLI1_HUMAN	LIG1	DNA ligase 1			1	940695	MS/MS	STY:79.9663@EWNGVVS(0.0178)ES(0.4911)DS(0.4911)PVK;
EWYQSTIPQSPSPAPDDPEEGR	EWYQSTIPQSPS[79.9663]PAPDDPEEGR	R	Q	706	727	22	3	12S(79.9663)	sp|Q08499|PDE4D_HUMAN	Q08499	PDE4D_HUMAN	PDE4D	3',5'-cyclic-AMP phosphodiesterase 4D			2	1.3566e+06	MS/MS	STY:79.9663@EWY(0.0316)QS(0.0316)T(0.0316)IPQS(0.0435)PS(0.8618)PAPDDPEEGR;
EYFDDSTEER	EYFDDS[79.9663]TEER	K	F	259	268	10	2	6S(79.9663)	sp|Q8NEF9|SRFB1_HUMAN	Q8NEF9	SRFB1_HUMAN	SRFBP1	Serum response factor-binding protein 1			1	1.64166e+06	MS/MS	STY:79.9663@EY(0.0217)FDDS(0.4892)T(0.4892)EER;
EYIPGQPPLSQSSDSSPTR	EYIPGQPPLSQSSDS[79.9663]SPTR	K	N	871	889	19	2	15S(79.9663)	sp|P07814|SYEP_HUMAN	P07814	SYEP_HUMAN	EPRS1	Bifunctional glutamate/proline--tRNA ligase			4	2.2226984E7	MS/MS	STY:79.9663@EY(0.0060)IPGQPPLS(0.0057)QS(0.0057)S(0.0057)DS(0.3256)S(0.3256)PT(0.3256)R;
EYIPGQPPLSQSSDSSPTR	EYIPGQPPLSQSS[79.9663]DSSPTR	K	N	871	889	19	3	13S(79.9663)	sp|P07814|SYEP_HUMAN	P07814	SYEP_HUMAN	EPRS1	Bifunctional glutamate/proline--tRNA ligase			1	3.87459e+06	MS/MS	STY:79.9663@EY(0.0156)IPGQPPLS(0.0113)QS(0.0113)S(0.9263)DS(0.0118)S(0.0118)PT(0.0118)R;
EYIPGQPPLSQSSDSSPTR	EYIPGQPPLSQS[79.9663]SDSSPTR	K	N	871	889	19	2,3	12S(79.9663)	sp|P07814|SYEP_HUMAN	P07814	SYEP_HUMAN	EPRS1	Bifunctional glutamate/proline--tRNA ligase			2	2.454432E7	MS/MS	STY:79.9663@EY(0.0073)IPGQPPLS(0.0146)QS(0.4763)S(0.4763)DS(0.0085)S(0.0085)PT(0.0085)R;
EYIPGQPPLSQSSDSSPTR	EYIPGQPPLS[79.9663]QSSDSSPTR	K	N	871	889	19	2,3	10S(79.9663)	sp|P07814|SYEP_HUMAN	P07814	SYEP_HUMAN	EPRS1	Bifunctional glutamate/proline--tRNA ligase			10	2.1330252E7	MS/MS	STY:79.9663@EY(0.0132)IPGQPPLS(0.9360)QS(0.0102)S(0.0102)DS(0.0102)S(0.0102)PT(0.0102)R;
EYIPGQPPLSQSSDSSPTR	EYIPGQPPLS[79.9663]QS[79.9663]SDSSPTR	K	N	871	889	19	2	10S(79.9663),12S(79.9663)	sp|P07814|SYEP_HUMAN	P07814	SYEP_HUMAN	EPRS1	Bifunctional glutamate/proline--tRNA ligase			1	0	MS/MS	STY:79.9663@EY(0.1140)IPGQPPLS(0.3143)QS(0.3143)S(0.3143)DS(0.3143)S(0.3143)PT(0.3143)R;
EYVSNDAAQSDDEEK	EYVSNDAAQS[79.9663]DDEEK	K	L	394	408	15	2	10S(79.9663)	sp|Q5JSH3|WDR44_HUMAN	Q5JSH3	WDR44_HUMAN	WDR44	WD repeat-containing protein 44			1	3.86741e+06	MS/MS	STY:79.9663@EY(0.0297)VS(0.2427)NDAAQS(0.7276)DDEEK;
EYFDDSTEER	EY[79.9663]FDDSTEER	K	F	259	268	10	2	2Y(79.9663)	sp|Q8NEF9|SRFB1_HUMAN	Q8NEF9	SRFB1_HUMAN	SRFBP1	Serum response factor-binding protein 1			1	1.70954e+06	MS/MS	STY:79.9663@EY(0.3333)FDDS(0.3333)T(0.3333)EER;
EYIPGQPPLSQSSDSSPTR	EY[79.9663]IPGQPPLSQSSDSSPTR	K	N	871	889	19	2,3	2Y(79.9663)	sp|P07814|SYEP_HUMAN	P07814	SYEP_HUMAN	EPRS1	Bifunctional glutamate/proline--tRNA ligase			4	3767263	MS/MS	STY:79.9663@EY(0.4742)IPGQPPLS(0.4742)QS(0.0106)S(0.0106)DS(0.0106)S(0.0100)PT(0.0100)R;
EYVSNDAAQSDDEEK	EY[79.9663]VSNDAAQSDDEEK	K	L	394	408	15	2	2Y(79.9663)	sp|Q5JSH3|WDR44_HUMAN	Q5JSH3	WDR44_HUMAN	WDR44	WD repeat-containing protein 44			2	3.86741e+06	MS/MS	STY:79.9663@EY(0.4829)VS(0.4829)NDAAQS(0.0342)DDEEK;
FASDDEHDEHDENGATGPVK	FASDDEHDEHDENGAT[79.9663]GPVK	K	R	364	383	20	3	16T(79.9663)	sp|P05455|LA_HUMAN	P05455	LA_HUMAN	SSB	Lupus La protein			3	2867292	MS/MS	STY:79.9663@FAS(0.0740)DDEHDEHDENGAT(0.9260)GPVK;
FASDDEHDEHDENGATGPVK	FAS[79.9663]DDEHDEHDENGATGPVK	K	R	364	383	20	3	3S(79.9663)	sp|P05455|LA_HUMAN	P05455	LA_HUMAN	SSB	Lupus La protein			30	6062228	MS/MS	STY:79.9663@FAS(0.9448)DDEHDEHDENGAT(0.0552)GPVK;
FDSNEEDSASVFSPSFGLK	FDSNEEDS[79.9663]ASVFSPSFGLK	K	Q	1464	1482	19	2	8S(79.9663)	sp|Q02880|TOP2B_HUMAN	Q02880	TOP2B_HUMAN	TOP2B	DNA topoisomerase 2-beta			1	0	MS/MS	STY:79.9663@FDS(0.3129)NEEDS(0.3362)AS(0.3362)VFS(0.0074)PS(0.0074)FGLK;
FDSNEEDSASVFSPSFGLK	FDS[79.9663]NEEDSASVFSPSFGLK	K	Q	1464	1482	19	2	3S(79.9663)	sp|Q02880|TOP2B_HUMAN	Q02880	TOP2B_HUMAN	TOP2B	DNA topoisomerase 2-beta			1	0	MS/MS	STY:79.9663@FDS(0.9412)NEEDS(0.0147)AS(0.0147)VFS(0.0147)PS(0.0145)FGLK;
FDSSLLSSDDETK	FDS[79.9663]SLLSSDDETK	K	C	556	568	13	2	3S(79.9663)	sp|P28715|ERCC5_HUMAN	P28715	ERCC5_HUMAN	ERCC5	DNA excision repair protein ERCC-5			1	1.09374e+06	MS/MS	STY:79.9663@FDS(0.2000)S(0.2000)LLS(0.2000)S(0.2000)DDET(0.2000)K;
FEDEDSDDVPR	FEDEDS[79.9663]DDVPR	K	K	698	708	11	2	6S(79.9663)	sp|P49756|RBM25_HUMAN	P49756	RBM25_HUMAN	RBM25	RNA-binding protein 25			1	0	MS/MS	STY:79.9663@FEDEDS(1.0000)DDVPR;
FEDEGAGFEESSETGDYEEK	FEDEGAGFEESSET[79.9663]GDYEEK	K	A	926	945	20	2	14T(79.9663)	sp|P46821|MAP1B_HUMAN	P46821	MAP1B_HUMAN	MAP1B	Microtubule-associated protein 1B			1	5.01544e+06	MS/MS	STY:79.9663@FEDEGAGFEES(0.0318)S(0.0318)ET(0.9047)GDY(0.0317)EEK;
FEDEGAGFEESSETGDYEEK	FEDEGAGFEESS[79.9663]ETGDYEEK	K	A	926	945	20	2	12S(79.9663)	sp|P46821|MAP1B_HUMAN	P46821	MAP1B_HUMAN	MAP1B	Microtubule-associated protein 1B			1	5.01544e+06	MS/MS	STY:79.9663@FEDEGAGFEES(0.0236)S(0.9258)ET(0.0257)GDY(0.0248)EEK;
FEDEGAGFEESSETGDYEEK	FEDEGAGFEES[79.9663]SETGDYEEK	K	A	926	945	20	2,3	11S(79.9663)	sp|P46821|MAP1B_HUMAN	P46821	MAP1B_HUMAN	MAP1B	Microtubule-associated protein 1B			8	6127025	MS/MS	STY:79.9663@FEDEGAGFEES(0.4858)S(0.4858)ET(0.0143)GDY(0.0141)EEK;
FEEESKEPVADEEEEDSDDDVEPITEFR	FEEESKEPVADEEEEDSDDDVEPIT[79.9663]EFR	K	F	86	113	28	3	25T(79.9663)	sp|P54105|ICLN_HUMAN	P54105	ICLN_HUMAN	CLNS1A	Methylosome subunit pICln			4	1.3318347E7	MS/MS	STY:79.9663@FEEES(0.0637)KEPVADEEEEDS(0.0792)DDDVEPIT(0.8571)EFR;
FEEESKEPVADEEEEDSDDDVEPITEFR	FEEESKEPVADEEEEDS[79.9663]DDDVEPITEFR	K	F	86	113	28	3	17S(79.9663)	sp|P54105|ICLN_HUMAN	P54105	ICLN_HUMAN	CLNS1A	Methylosome subunit pICln			14	1.3672239E7	MS/MS	STY:79.9663@FEEES(0.0321)KEPVADEEEEDS(0.9406)DDDVEPIT(0.0272)EFR;
FEEESKEPVADEEEEDSDDDVEPITEFR	FEEES[79.9663]KEPVADEEEEDSDDDVEPITEFR	K	F	86	113	28	3	5S(79.9663)	sp|P54105|ICLN_HUMAN	P54105	ICLN_HUMAN	CLNS1A	Methylosome subunit pICln			2	5965858	MS/MS	STY:79.9663@FEEES(0.7612)KEPVADEEEEDS(0.1867)DDDVEPIT(0.0521)EFR;
FEPESPGFESR	FEPES[79.9663]PGFESR	R	S	79	89	11	2	5S(79.9663)	sp|Q9H5H4|ZN768_HUMAN	Q9H5H4	ZN768_HUMAN	ZNF768	Zinc finger protein 768			1	609487	MS/MS	STY:79.9663@FEPES(0.5908)PGFES(0.4092)R;
FESPESQASAEQPEM	FES[79.9663]PESQASAEQPEM	R	-	313	327	15	2	3S(79.9663)	sp|O75436|VP26A_HUMAN	O75436	VP26A_HUMAN	VPS26A	Vacuolar protein sorting-associated protein 26A			1	832066	MS/MS	STY:79.9663@FES(0.3333)PES(0.3333)QAS(0.3333)AEQPEM;
FGESEEVEMEVESDEEDDK	FGESEEVEMEVES[79.9663]DEEDDK	K	Q	317	335	19	2	13S(79.9663)	sp|Q15459|SF3A1_HUMAN	Q15459	SF3A1_HUMAN	SF3A1	Splicing factor 3A subunit 1			2	2.02956e+06	MS/MS	STY:79.9663@FGES(0.0672)EEVEMEVES(0.9328)DEEDDK;
FGESEEVEMEVESDEEDDK	FGESEEVEM[15.9949]EVES[79.9663]DEEDDK	K	Q	317	335	19	2,3	13S(79.9663),9M(15.9949)	sp|Q15459|SF3A1_HUMAN	Q15459	SF3A1_HUMAN	SF3A1	Splicing factor 3A subunit 1			2	2.52253e+06	MS/MS	STY:79.9663@FGES(0.1000)EEVEMEVES(0.9000)DEEDDK;M:15.9949@FGESEEVEM(1.0000)EVESDEEDDK;
FGESEEVEMEVESDEEDDKQEK	FGES[79.9663]EEVEMEVESDEEDDKQEK	K	A	317	338	22	3	4S(79.9663)	sp|Q15459|SF3A1_HUMAN	Q15459	SF3A1_HUMAN	SF3A1	Splicing factor 3A subunit 1			3	963360	MS/MS	STY:79.9663@FGES(0.6934)EEVEMEVES(0.3066)DEEDDKQEK;
FGESEEVEMEVESDEEDDK	FGES[79.9663]EEVEM[15.9949]EVESDEEDDK	K	Q	317	335	19	2,3	4S(79.9663),9M(15.9949)	sp|Q15459|SF3A1_HUMAN	Q15459	SF3A1_HUMAN	SF3A1	Splicing factor 3A subunit 1			2	2.52253e+06	MS/MS	STY:79.9663@FGES(0.7757)EEVEMEVES(0.2243)DEEDDK;M:15.9949@FGESEEVEM(1.0000)EVESDEEDDK;
FGESEEVEMEVESDEEDDKQEK	FGES[79.9663]EEVEM[15.9949]EVESDEEDDKQEK	K	A	317	338	22	3	4S(79.9663),9M(15.9949)	sp|Q15459|SF3A1_HUMAN	Q15459	SF3A1_HUMAN	SF3A1	Splicing factor 3A subunit 1			1	746133	MS/MS	STY:79.9663@FGES(0.5000)EEVEMEVES(0.5000)DEEDDKQEK;M:15.9949@FGESEEVEM(1.0000)EVESDEEDDKQEK;
FGQAATMEGIGAIGGTPPAFNR	FGQAATMEGIGAIGGT[79.9663]PPAFNR	R	A	435	456	22	3	16T(79.9663)	sp|Q15233|NONO_HUMAN	Q15233	NONO_HUMAN	NONO	Non-POU domain-containing octamer-binding protein			2	1.12508e+06	MS/MS	STY:79.9663@FGQAAT(0.0596)MEGIGAIGGT(0.9404)PPAFNR;
FIQELSGSSPK	FIQELSGSS[79.9663]PK	R	R	116	126	11	2	9S(79.9663)	sp|Q01664|TFAP4_HUMAN	Q01664	TFAP4_HUMAN	TFAP4	Transcription factor AP-4			1	1.64161e+06	MS/MS	STY:79.9663@FIQELS(0.0285)GS(0.0285)S(0.9429)PK;
FIQELSGSSPK	FIQELSGS[79.9663]SPK	R	R	116	126	11	2	8S(79.9663)	sp|Q01664|TFAP4_HUMAN	Q01664	TFAP4_HUMAN	TFAP4	Transcription factor AP-4			2	3187994	MS/MS	STY:79.9663@FIQELS(0.0186)GS(0.4907)S(0.4907)PK;
FIQELSGSSPK	FIQELS[79.9663]GSSPK	R	R	116	126	11	2	6S(79.9663)	sp|Q01664|TFAP4_HUMAN	Q01664	TFAP4_HUMAN	TFAP4	Transcription factor AP-4			5	3187994	MS/MS	STY:79.9663@FIQELS(0.3333)GS(0.3333)S(0.3333)PK;
FLESAAADFSDEDEDDDVDGR	FLESAAADFS[79.9663]DEDEDDDVDGR	K	E	236	256	21	2	10S(79.9663)	sp|O43815|STRN_HUMAN	O43815	STRN_HUMAN	STRN	Striatin			3	1.84188e+06	MS/MS	STY:79.9663@FLES(0.1252)AAADFS(0.8748)DEDEDDDVDGR;
FLESAAADFSDEDEDDDVDGR	FLES[79.9663]AAADFSDEDEDDDVDGR	K	E	236	256	21	3	4S(79.9663)	sp|O43815|STRN_HUMAN	O43815	STRN_HUMAN	STRN	Striatin			2	344850	MS/MS	STY:79.9663@FLES(0.5000)AAADFS(0.5000)DEDEDDDVDGR;
FNDSEGDDTEETEDYR	FNDSEGDDTEETEDY[79.9663]R	K	Q	394	409	16	2,3	15Y(79.9663)	sp|Q9NYF8|BCLF1_HUMAN	Q9NYF8	BCLF1_HUMAN	BCLAF1	Bcl-2-associated transcription factor 1			2	7.68188e+06	MS/MS	STY:79.9663@FNDS(0.0477)EGDDT(0.0477)EET(0.0477)EDY(0.8569)R;
FNDSEGDDTEETEDYR	FNDSEGDDTEET[79.9663]EDYR	K	Q	394	409	16	2	12T(79.9663)	sp|Q9NYF8|BCLF1_HUMAN	Q9NYF8	BCLF1_HUMAN	BCLAF1	Bcl-2-associated transcription factor 1			2	1.707638E7	MS/MS	STY:79.9663@FNDS(0.0511)EGDDT(0.0511)EET(0.8800)EDY(0.0178)R;
FNDSEGDDTEETEDYR	FNDSEGDDT[79.9663]EETEDYR	K	Q	394	409	16	2	9T(79.9663)	sp|Q9NYF8|BCLF1_HUMAN	Q9NYF8	BCLF1_HUMAN	BCLAF1	Bcl-2-associated transcription factor 1			4	1.707638E7	MS/MS	STY:79.9663@FNDS(0.0195)EGDDT(0.9401)EET(0.0220)EDY(0.0183)R;
FNDSEGDDTEETEDYR	FNDSEGDDT[79.9663]EET[79.9663]EDYR	K	Q	394	409	16	2	12T(79.9663),9T(79.9663)	sp|Q9NYF8|BCLF1_HUMAN	Q9NYF8	BCLF1_HUMAN	BCLAF1	Bcl-2-associated transcription factor 1			1	1.12482e+06	MS/MS	STY:79.9663@FNDS(0.1025)EGDDT(0.9171)EET(0.9171)EDY(0.0632)R;
FNDSEGDDTEETEDYR	FNDS[79.9663]EGDDTEETEDYR	K	Q	394	409	16	2	4S(79.9663)	sp|Q9NYF8|BCLF1_HUMAN	Q9NYF8	BCLF1_HUMAN	BCLAF1	Bcl-2-associated transcription factor 1			9	2.501986E7	MS/MS	STY:79.9663@FNDS(0.9439)EGDDT(0.0190)EET(0.0186)EDY(0.0186)R;
FNDSEGDDTEETEDYR	FNDS[79.9663]EGDDT[79.9663]EETEDYR	K	Q	394	409	16	2	4S(79.9663),9T(79.9663)	sp|Q9NYF8|BCLF1_HUMAN	Q9NYF8	BCLF1_HUMAN	BCLAF1	Bcl-2-associated transcription factor 1			2	1.12482e+06	MS/MS	STY:79.9663@FNDS(0.6430)EGDDT(0.6430)EET(0.6430)EDY(0.0709)R;
FQEQECPPSPEPTR	FQEQEC[57.0215]PPS[79.9663]PEPTR	K	K	178	191	14	2	6C(57.0215),9S(79.9663)	sp|P62070|RRAS2_HUMAN	P62070	RRAS2_HUMAN	RRAS2	Ras-related protein R-Ras2			1	0	MS/MS	STY:79.9663@FQEQECPPS(0.9042)PEPT(0.0958)R;
FSEMMNNMGGDEDVDLPEVDGADDDSQDSDDEK	FSEMMNNMGGDEDVDLPEVDGADDDS[79.9663]QDSDDEK	R	M	123	155	33	3	26S(79.9663)	sp|Q15185|TEBP_HUMAN	Q15185	TEBP_HUMAN	PTGES3	Prostaglandin E synthase 3			5	2.9753212E7	MS/MS	STY:79.9663@FS(0.3962)EMMNNMGGDEDVDLPEVDGADDDS(0.5692)QDS(0.0346)DDEK;
FSEMMNNMGGDEDVDLPEVDGADDDSQDSDDEK	FSEM[15.9949]MNNMGGDEDVDLPEVDGADDDS[79.9663]QDSDDEK	R	M	123	155	33	3	26S(79.9663),4M(15.9949)	sp|Q15185|TEBP_HUMAN	Q15185	TEBP_HUMAN	PTGES3	Prostaglandin E synthase 3			3	7.63944e+06	MS/MS	STY:79.9663@FS(0.3921)EMMNNMGGDEDVDLPEVDGADDDS(0.5722)QDS(0.0358)DDEK;M:15.9949@FSEM(0.3333)M(0.3333)NNM(0.3333)GGDEDVDLPEVDGADDDSQDSDDEK;
FSGEEGEIEDDESGTENR	FSGEEGEIEDDES[79.9663]GTENR	K	E	927	944	18	2	13S(79.9663)	sp|Q9Y2W1|TR150_HUMAN	Q9Y2W1	TR150_HUMAN	THRAP3	Thyroid hormone receptor-associated protein 3			3	2.05483e+06	MS/MS	STY:79.9663@FS(0.0183)GEEGEIEDDES(0.4908)GT(0.4908)ENR;
FSGEEGEIEDDESGTENREEK	FSGEEGEIEDDES[79.9663]GTENREEK	K	D	927	947	21	3	13S(79.9663)	sp|Q9Y2W1|TR150_HUMAN	Q9Y2W1	TR150_HUMAN	THRAP3	Thyroid hormone receptor-associated protein 3			1	737804	MS/MS	STY:79.9663@FS(0.0479)GEEGEIEDDES(0.4761)GT(0.4761)ENREEK;
FSGEEGEIEDDESGTENREEK	FSGEEGEIEDDES[79.9663]GT[79.9663]ENREEK	K	D	927	947	21	3	13S(79.9663),15T(79.9663)	sp|Q9Y2W1|TR150_HUMAN	Q9Y2W1	TR150_HUMAN	THRAP3	Thyroid hormone receptor-associated protein 3			1	1448537	MS/MS	STY:79.9663@FS(0.2646)GEEGEIEDDES(0.8677)GT(0.8677)ENREEK;
FSPVTPK	FSPVT[79.9663]PK	K	F	266	272	7	2	5T(79.9663)	sp|Q15942|ZYX_HUMAN	Q15942	ZYX_HUMAN	ZYX	Zyxin			1	729777	MS/MS	STY:79.9663@FS(0.2531)PVT(0.7469)PK;
FSEMMNNMGGDEDVDLPEVDGADDDSQDSDDEK	FS[79.9663]EMMNNMGGDEDVDLPEVDGADDDSQDSDDEK	R	M	123	155	33	3	2S(79.9663)	sp|Q15185|TEBP_HUMAN	Q15185	TEBP_HUMAN	PTGES3	Prostaglandin E synthase 3			1	9153854	MS/MS	STY:79.9663@FS(0.6865)EMMNNMGGDEDVDLPEVDGADDDS(0.0349)QDS(0.2786)DDEK;
FSEMMNNMGGDEDVDLPEVDGADDDSQDSDDEK	FS[79.9663]EMMNNM[15.9949]GGDEDVDLPEVDGADDDSQDSDDEK	R	M	123	155	33	3	2S(79.9663),8M(15.9949)	sp|Q15185|TEBP_HUMAN	Q15185	TEBP_HUMAN	PTGES3	Prostaglandin E synthase 3			1	4475059	MS/MS	STY:79.9663@FS(0.5497)EMMNNMGGDEDVDLPEVDGADDDS(0.2252)QDS(0.2252)DDEK;M:15.9949@FSEM(0.0370)M(0.0370)NNM(0.9260)GGDEDVDLPEVDGADDDSQDSDDEK;
FSGEEGEIEDDESGTENR	FS[79.9663]GEEGEIEDDESGTENR	K	E	927	944	18	2	2S(79.9663)	sp|Q9Y2W1|TR150_HUMAN	Q9Y2W1	TR150_HUMAN	THRAP3	Thyroid hormone receptor-associated protein 3			1	0	MS/MS	STY:79.9663@FS(0.3333)GEEGEIEDDES(0.3333)GT(0.3333)ENR;
FSGEEGEIEDDESGTENREEK	FS[79.9663]GEEGEIEDDESGTENREEK	K	D	927	947	21	3	2S(79.9663)	sp|Q9Y2W1|TR150_HUMAN	Q9Y2W1	TR150_HUMAN	THRAP3	Thyroid hormone receptor-associated protein 3			1	1.14651e+06	MS/MS	STY:79.9663@FS(0.3333)GEEGEIEDDES(0.3333)GT(0.3333)ENREEK;
FSPTMGR	FS[79.9663]PTMGR	R	H	394	400	7	2	2S(79.9663)	sp|P78344|IF4G2_HUMAN	P78344	IF4G2_HUMAN	EIF4G2	Eukaryotic translation initiation factor 4 gamma 2			1	921195	MS/MS	STY:79.9663@FS(0.5000)PT(0.5000)MGR;
FVPAENDSILMNPAQDGEVQLSQNDDK	FVPAENDSILMNPAQDGEVQLS[79.9663]QNDDK	K	T	559	585	27	3	22S(79.9663)	sp|Q12888|TP53B_HUMAN	Q12888	TP53B_HUMAN	TP53BP1	TP53-binding protein 1			1	0	MS/MS	STY:79.9663@FVPAENDS(0.1336)ILMNPAQDGEVQLS(0.8664)QNDDK;
FVSEGDGGR	FVS[79.9663]EGDGGR	R	L	455	463	9	2	3S(79.9663)	sp|Q53EL6|PDCD4_HUMAN	Q53EL6	PDCD4_HUMAN	PDCD4	Programmed cell death protein 4			7	1.13003e+06	MS/MS	STY:79.9663@FVS(1.0000)EGDGGR;
GAAAAATGQPGTAPAGTPGAPPLAGMAIVK	GAAAAATGQPGTAPAGT[79.9663]PGAPPLAGMAIVK	R	E	525	554	30	3	17T(79.9663)	sp|Q13263|TIF1B_HUMAN	Q13263	TIF1B_HUMAN	TRIM28	Transcription intermediary factor 1-beta			1	0	MS/MS	STY:79.9663@GAAAAAT(0.0683)GQPGT(0.0272)APAGT(0.9045)PGAPPLAGMAIVK;
GAAEEAELEDSDDEEK	GAAEEAELEDS[79.9663]DDEEK	K	P	88	103	16	2	11S(79.9663)	sp|Q9UBB9|TFP11_HUMAN	Q9UBB9	TFP11_HUMAN	TFIP11	Tuftelin-interacting protein 11			2	2.21406e+06	MS/MS	STY:79.9663@GAAEEAELEDS(1.0000)DDEEK;
GAAEEAELEDSDDEEKPVK	GAAEEAELEDS[79.9663]DDEEKPVK	K	Q	88	106	19	3	11S(79.9663)	sp|Q9UBB9|TFP11_HUMAN	Q9UBB9	TFP11_HUMAN	TFIP11	Tuftelin-interacting protein 11			1	474892	MS/MS	STY:79.9663@GAAEEAELEDS(1.0000)DDEEKPVK;
GAAPTPPGK	GAAPT[79.9663]PPGK	K	T	910	918	9	2	5T(79.9663)	sp|Q13428|TCOF_HUMAN	Q13428	TCOF_HUMAN	TCOF1	Treacle protein			6	1433004	MS/MS	STY:79.9663@GAAPT(1.0000)PPGK;
GACSTPDMPQFEPVK	GAC[57.0215]S[79.9663]TPDMPQFEPVK	R	T	682	696	15	2	3C(57.0215),4S(79.9663)	sp|Q9H4G0|E41L1_HUMAN	Q9H4G0	E41L1_HUMAN	EPB41L1	Band 4.1-like protein 1			1	502244	MS/MS	STY:79.9663@GACS(0.5000)T(0.5000)PDMPQFEPVK;
GADNDGSGSESGYTTPK	GADNDGS[79.9663]GSESGYTTPK	K	K	206	222	17	2	7S(79.9663)	sp|Q7Z417|NUFP2_HUMAN	Q7Z417	NUFP2_HUMAN	NUFIP2	FMR1-interacting protein NUFIP2			3	1.719e+06	MS/MS	STY:79.9663@GADNDGS(0.8721)GS(0.0117)ES(0.0117)GY(0.0115)T(0.0115)T(0.0815)PK;
GAEAFGDSEEDGEDVFEVEK	GAEAFGDS[79.9663]EEDGEDVFEVEK	R	I	44	63	20	2	8S(79.9663)	sp|Q99549|MPP8_HUMAN	Q99549	MPP8_HUMAN	MPHOSPH8	M-phase phosphoprotein 8			1	3.12425e+06	MS/MS	STY:79.9663@GAEAFGDS(1.0000)EEDGEDVFEVEK;
GAEASAASEEEAGPQATEPSTPSGPESGPTPASAEQNE	GAEASAASEEEAGPQATEPSTPSGPES[79.9663]GPTPASAEQNE	K	-	158	195	38	3	27S(79.9663)	sp|P49006|MRP_HUMAN	P49006	MRP_HUMAN	MARCKSL1	MARCKS-related protein			1	0	MS/MS	STY:79.9663@GAEAS(0.2227)AAS(0.2227)EEEAGPQAT(0.0259)EPS(0.0048)T(0.0048)PS(0.0259)GPES(0.2442)GPT(0.2442)PAS(0.0048)AEQNE;
GAESPFEEK	GAES[79.9663]PFEEK	R	S	1424	1432	9	2	4S(79.9663)	sp|P46821|MAP1B_HUMAN	P46821	MAP1B_HUMAN	MAP1B	Microtubule-associated protein 1B			3	917590	MS/MS	STY:79.9663@GAES(1.0000)PFEEK;
GAGATSGSPPAGR	GAGATSGS[79.9663]PPAGR	K	N	194	206	13	2	8S(79.9663)	sp|P16455|MGMT_HUMAN	P16455	MGMT_HUMAN	MGMT	Methylated-DNA--protein-cysteine methyltransferase			1	358423	MS/MS	STY:79.9663@GAGAT(0.0842)S(0.0842)GS(0.8316)PPAGR;
GAGATSGSPPAGR	GAGAT[79.9663]SGSPPAGR	K	N	194	206	13	2	5T(79.9663)	sp|P16455|MGMT_HUMAN	P16455	MGMT_HUMAN	MGMT	Methylated-DNA--protein-cysteine methyltransferase			2	358423	MS/MS	STY:79.9663@GAGAT(0.3333)S(0.3333)GS(0.3333)PPAGR;
GAGDGSDEEVDGK	GAGDGS[79.9663]DEEVDGK	K	A	1938	1950	13	2	6S(79.9663)	sp|P35579|MYH9_HUMAN	P35579	MYH9_HUMAN	MYH9	Myosin-9			43	2.3026652E7	MS/MS	STY:79.9663@GAGDGS(1.0000)DEEVDGK;
GAGDGSDEEVDGKADGAEAKPAE	GAGDGS[79.9663]DEEVDGKADGAEAKPAE	K	-	1938	1960	23	3	6S(79.9663)	sp|P35579|MYH9_HUMAN	P35579	MYH9_HUMAN	MYH9	Myosin-9			1	529055	MS/MS	STY:79.9663@GAGDGS(1.0000)DEEVDGKADGAEAKPAE;
GAILSEEELAAMSPTAAAVAK	GAILS[79.9663]EEELAAMSPTAAAVAK	K	I	367	387	21	2	5S(79.9663)	sp|P12270|TPR_HUMAN	P12270	TPR_HUMAN	TPR	Nucleoprotein TPR			1	0	MS/MS	STY:79.9663@GAILS(0.9346)EEELAAMS(0.0327)PT(0.0327)AAAVAK;
GALQNIIPASTGAAK	GALQNIIPAS[79.9663]TGAAK	R	A	201	215	15	2	10S(79.9663)	sp|P04406|G3P_HUMAN	P04406	G3P_HUMAN	GAPDH	Glyceraldehyde-3-phosphate dehydrogenase			1	521097	MS/MS	STY:79.9663@GALQNIIPAS(0.5000)T(0.5000)GAAK;
GAMPPAPVPAGTPAPPGPATMMPDGTLGLTPPTTER	GAMPPAPVPAGTPAPPGPATMMPDGT[79.9663]LGLTPPTTER	R	F	399	434	36	3	26T(79.9663)	sp|Q15233|NONO_HUMAN	Q15233	NONO_HUMAN	NONO	Non-POU domain-containing octamer-binding protein			1	1.008102E7	MS/MS	STY:79.9663@GAMPPAPVPAGT(0.0212)PAPPGPAT(0.0212)MMPDGT(0.2394)LGLT(0.2394)PPT(0.2394)T(0.2394)ER;
GAMPPAPVPAGTPAPPGPATMMPDGTLGLTPPTTER	GAMPPAPVPAGT[79.9663]PAPPGPATMMPDGTLGLTPPTTER	R	F	399	434	36	3	12T(79.9663)	sp|Q15233|NONO_HUMAN	Q15233	NONO_HUMAN	NONO	Non-POU domain-containing octamer-binding protein			1	3.67632e+06	MS/MS	STY:79.9663@GAMPPAPVPAGT(0.3821)PAPPGPAT(0.0065)MMPDGT(0.0065)LGLT(0.0462)PPT(0.2669)T(0.2918)ER;
GAPSQDDESGGIEDSPDR	GAPSQDDESGGIEDS[79.9663]PDR	K	G	664	681	18	2	15S(79.9663)	sp|Q9H4G0|E41L1_HUMAN	Q9H4G0	E41L1_HUMAN	EPB41L1	Band 4.1-like protein 1			1	347494	MS/MS	STY:79.9663@GAPS(0.0292)QDDES(0.0305)GGIEDS(0.9404)PDR;
GAPSSPATGVLPSPQGK	GAPSSPATGVLPS[79.9663]PQGK	R	S	1705	1721	17	2	13S(79.9663)	sp|Q5SRE5|NU188_HUMAN	Q5SRE5	NU188_HUMAN	NUP188	Nucleoporin NUP188			1	2.62963e+06	MS/MS	STY:79.9663@GAPS(0.0214)S(0.0214)PAT(0.0214)GVLPS(0.9358)PQGK;
GAPSSPATGVLPSPQGK	GAPSS[79.9663]PATGVLPSPQGK	R	S	1705	1721	17	2	5S(79.9663)	sp|Q5SRE5|NU188_HUMAN	Q5SRE5	NU188_HUMAN	NUP188	Nucleoporin NUP188			1	2.62963e+06	MS/MS	STY:79.9663@GAPS(0.0289)S(0.4793)PAT(0.4793)GVLPS(0.0124)PQGK;
GAPSQDDESGGIEDSPDR	GAPS[79.9663]QDDESGGIEDSPDR	K	G	664	681	18	2	4S(79.9663)	sp|Q9H4G0|E41L1_HUMAN	Q9H4G0	E41L1_HUMAN	EPB41L1	Band 4.1-like protein 1			1	347494	MS/MS	STY:79.9663@GAPS(0.4795)QDDES(0.4795)GGIEDS(0.0409)PDR;
GAPSSPATGVLPSPQGK	GAPS[79.9663]SPATGVLPSPQGK	R	S	1705	1721	17	2	4S(79.9663)	sp|Q5SRE5|NU188_HUMAN	Q5SRE5	NU188_HUMAN	NUP188	Nucleoporin NUP188			4	2.62963e+06	MS/MS	STY:79.9663@GAPS(0.4868)S(0.4868)PAT(0.0138)GVLPS(0.0127)PQGK;
GARPPAAGPGGDEDEDEEDTAPESALDTSLDK	GARPPAAGPGGDEDEDEEDT[79.9663]APESALDT[79.9663]SLDK	R	S	1160	1191	32	3	20T(79.9663),28T(79.9663)	sp|Q27J81|INF2_HUMAN	Q27J81	INF2_HUMAN	INF2	Inverted formin-2			1	0	MS/MS	STY:79.9663@GARPPAAGPGGDEDEDEEDT(0.6081)APES(0.2662)ALDT(0.5629)S(0.5629)LDK;
GARPPAAGPGGDEDEDEEDTAPESALDTSLDK	GARPPAAGPGGDEDEDEEDT[79.9663]APES[79.9663]ALDTSLDK	R	S	1160	1191	32	3	20T(79.9663),24S(79.9663)	sp|Q27J81|INF2_HUMAN	Q27J81	INF2_HUMAN	INF2	Inverted formin-2			1	1.97831e+06	MS/MS	STY:79.9663@GARPPAAGPGGDEDEDEEDT(0.5299)APES(0.4900)ALDT(0.4900)S(0.4900)LDK;
GDDDEESDEEAVK	GDDDEES[79.9663]DEEAVK	K	K	613	625	13	2	7S(79.9663)	sp|O43395|PRPF3_HUMAN	O43395	PRPF3_HUMAN	PRPF3	U4/U6 small nuclear ribonucleoprotein Prp3			3	4981848	MS/MS	STY:79.9663@GDDDEES(1.0000)DEEAVK;
GDDDEESDEEAVKK	GDDDEES[79.9663]DEEAVKK	K	T	613	626	14	2,3	7S(79.9663)	sp|O43395|PRPF3_HUMAN	O43395	PRPF3_HUMAN	PRPF3	U4/U6 small nuclear ribonucleoprotein Prp3			6	2694112	MS/MS	STY:79.9663@GDDDEES(1.0000)DEEAVKK;
GDLGPASPSQELGSQPVPGGDGAPALGK	GDLGPAS[79.9663]PSQELGSQPVPGGDGAPALGK	K	S	356	383	28	3	7S(79.9663)	sp|Q4KMQ1|TPRN_HUMAN	Q4KMQ1	TPRN_HUMAN	TPRN	Taperin			1	217478	MS/MS	STY:79.9663@GDLGPAS(0.3333)PS(0.3333)QELGS(0.3333)QPVPGGDGAPALGK;
GDLSDVEEEEEEEMDVDEATGAVK	GDLS[79.9663]DVEEEEEEEMDVDEATGAVK	R	K	829	852	24	3	4S(79.9663)	sp|Q96ST3|SIN3A_HUMAN	Q96ST3	SIN3A_HUMAN	SIN3A	Paired amphipathic helix protein Sin3a			1	0	MS/MS	STY:79.9663@GDLS(0.6059)DVEEEEEEEMDVDEAT(0.3941)GAVK;
GDPPRLSPDPVAGSAVSQELR	GDPPRLS[79.9663]PDPVAGSAVSQELR	R	E	48	68	21	3	7S(79.9663)	sp|Q9BUR4|TCAB1_HUMAN	Q9BUR4	TCAB1_HUMAN	WRAP53	Telomerase Cajal body protein 1			5	870023	MS/MS	STY:79.9663@GDPPRLS(0.9413)PDPVAGS(0.0294)AVS(0.0293)QELR;
GDQPAASGDSDDDEPPPLPR	GDQPAASGDS[79.9663]DDDEPPPLPR	R	L	48	67	20	2,3	10S(79.9663)	sp|O00264|PGRC1_HUMAN	O00264	PGRC1_HUMAN	PGRMC1	Membrane-associated progesterone receptor component 1			3	7.92597e+06	MS/MS	STY:79.9663@GDQPAAS(0.0606)GDS(0.9394)DDDEPPPLPR;
GDQPAASGDSDDDEPPPLPR	GDQPAAS[79.9663]GDSDDDEPPPLPR	R	L	48	67	20	2,3	7S(79.9663)	sp|O00264|PGRC1_HUMAN	O00264	PGRC1_HUMAN	PGRMC1	Membrane-associated progesterone receptor component 1			10	8522918	MS/MS	STY:79.9663@GDQPAAS(0.7998)GDS(0.2002)DDDEPPPLPR;
GDSDDEKPR	GDS[79.9663]DDEKPR	K	K	214	222	9	2	3S(79.9663)	sp|Q9UKV3|ACINU_HUMAN	Q9UKV3	ACINU_HUMAN	ACIN1	Apoptotic chromatin condensation inducer in the nucleus			1	561626	MS/MS	STY:79.9663@GDS(1.0000)DDEKPR;
GDSESEEDEDLEVPVPSR	GDS[79.9663]ESEEDEDLEVPVPSR	K	F	76	93	18	2	3S(79.9663)	sp|P13861|KAP2_HUMAN	P13861	KAP2_HUMAN	PRKAR2A	cAMP-dependent protein kinase type II-alpha regulatory subunit			2	818007	MS/MS	STY:79.9663@GDS(0.4915)ES(0.4915)EEDEDLEVPVPS(0.0169)R;
GDSIEEILADSEDEEDNEEEER	GDS[79.9663]IEEILADSEDEEDNEEEER	K	S	1070	1091	22	3	3S(79.9663)	sp|Q5JTH9|RRP12_HUMAN	Q5JTH9	RRP12_HUMAN	RRP12	RRP12-like protein			1	2.90524e+06	MS/MS	STY:79.9663@GDS(0.5000)IEEILADS(0.5000)EDEEDNEEEER;
GDSPENR	GDS[79.9663]PENR	R	T	340	346	7	2	3S(79.9663)	sp|O15027|SC16A_HUMAN	O15027	SC16A_HUMAN	SEC16A	Protein transport protein Sec16A			3	484376	MS/MS	STY:79.9663@GDS(1.0000)PENR;
GDTVSASPCSAPLAR	GDTVS[79.9663]ASPC[57.0215]SAPLAR	R	A	239	253	15	2	5S(79.9663),9C(57.0215)	sp|Q15477|SKI2_HUMAN	Q15477	SKI2_HUMAN	SKIC2	Superkiller complex protein 2			1	587918	MS/MS	STY:79.9663@GDT(0.0206)VS(0.9379)AS(0.0208)PCS(0.0208)APLAR;
GDTVSASPCSAPLAR	GDT[79.9663]VSASPC[57.0215]SAPLAR	R	A	239	253	15	2	3T(79.9663),9C(57.0215)	sp|Q15477|SKI2_HUMAN	Q15477	SKI2_HUMAN	SKIC2	Superkiller complex protein 2			1	0	MS/MS	STY:79.9663@GDT(0.2500)VS(0.2500)AS(0.2500)PCS(0.2500)APLAR;
GDVMSTACGTPGYVAPEVLAQK	GDVMS[79.9663]TAC[57.0215]GTPGYVAPEVLAQK	K	P	175	196	22	3	5S(79.9663),8C(57.0215)	sp|Q8IU85|KCC1D_HUMAN	Q8IU85	KCC1D_HUMAN	CAMK1D	Calcium/calmodulin-dependent protein kinase type 1D			1	824647	MS/MS	STY:79.9663@GDVMS(0.4810)T(0.4810)ACGT(0.0230)PGY(0.0150)VAPEVLAQK;
GDVTAEEAAGASPAK	GDVTAEEAAGAS[79.9663]PAK	R	A	11	25	15	2	12S(79.9663)	sp|P49006|MRP_HUMAN	P49006	MRP_HUMAN	MARCKSL1	MARCKS-related protein			3	1.66078e+06	MS/MS	STY:79.9663@GDVT(0.0609)AEEAAGAS(0.9391)PAK;
GDVTAEEAAGASPAK	GDVT[79.9663]AEEAAGASPAK	R	A	11	25	15	2	4T(79.9663)	sp|P49006|MRP_HUMAN	P49006	MRP_HUMAN	MARCKSL1	MARCKS-related protein			1	865643	MS/MS	STY:79.9663@GDVT(0.5142)AEEAAGAS(0.4858)PAK;
GEAAAERPGEAAVASSPSK	GEAAAERPGEAAVASSPS[79.9663]K	K	A	12	30	19	2	18S(79.9663)	sp|P29966|MARCS_HUMAN	P29966	MARCS_HUMAN	MARCKS	Myristoylated alanine-rich C-kinase substrate			1	1.47282e+06	MS/MS	STY:79.9663@GEAAAERPGEAAVAS(0.2177)S(0.2177)PS(0.5645)K;
GEAAAERPGEAAVASSPSK	GEAAAERPGEAAVASS[79.9663]PSK	K	A	12	30	19	2	16S(79.9663)	sp|P29966|MARCS_HUMAN	P29966	MARCS_HUMAN	MARCKS	Myristoylated alanine-rich C-kinase substrate			3	1.47282e+06	MS/MS	STY:79.9663@GEAAAERPGEAAVAS(0.0312)S(0.4844)PS(0.4844)K;
GEAAAERPGEAAVASSPSK	GEAAAERPGEAAVAS[79.9663]SPSK	K	A	12	30	19	2,3	15S(79.9663)	sp|P29966|MARCS_HUMAN	P29966	MARCS_HUMAN	MARCKS	Myristoylated alanine-rich C-kinase substrate			11	2632618	MS/MS	STY:79.9663@GEAAAERPGEAAVAS(0.4907)S(0.4907)PS(0.0187)K;
GEADDEDDDEDGQDNQGTVTEGSSPAYLK	GEADDEDDDEDGQDNQGTVT[79.9663]EGSSPAYLK	K	E	155	183	29	3	20T(79.9663)	sp|Q86U86|PB1_HUMAN	Q86U86	PB1_HUMAN	PBRM1	Protein polybromo-1			1	0	MS/MS	STY:79.9663@GEADDEDDDEDGQDNQGT(0.0507)VT(0.2373)EGS(0.2373)S(0.2373)PAY(0.2373)LK;
GEAEQSEEEADEEDK	GEAEQS[79.9663]EEEADEEDK	K	A	1011	1025	15	2	6S(79.9663)	sp|P46821|MAP1B_HUMAN	P46821	MAP1B_HUMAN	MAP1B	Microtubule-associated protein 1B			13	8530569	MS/MS	STY:79.9663@GEAEQS(1.0000)EEEADEEDK;
GEDSAEETEAK	GEDSAEET[79.9663]EAK	K	P	479	489	11	2	8T(79.9663)	sp|Q12906|ILF3_HUMAN	Q12906	ILF3_HUMAN	ILF3	Interleukin enhancer-binding factor 3			4	1.0366775E7	MS/MS	STY:79.9663@GEDS(0.0722)AEET(0.9278)EAK;
GEDSAEETEAK	GEDS[79.9663]AEETEAK	K	P	479	489	11	2	4S(79.9663)	sp|Q12906|ILF3_HUMAN	Q12906	ILF3_HUMAN	ILF3	Interleukin enhancer-binding factor 3			18	1.0366775E7	MS/MS	STY:79.9663@GEDS(0.9363)AEET(0.0637)EAK;
GEDVPSEEEEEEENGFEDR	GEDVPS[79.9663]EEEEEEENGFEDR	R	K	179	197	19	2,3	6S(79.9663)	sp|Q9ULX3|NOB1_HUMAN	Q9ULX3	NOB1_HUMAN	NOB1	RNA-binding protein NOB1			5	3.14845e+06	MS/MS	STY:79.9663@GEDVPS(1.0000)EEEEEEENGFEDR;
GEEGSDDDETENGPK	GEEGS[79.9663]DDDETENGPK	K	P	966	980	15	2	5S(79.9663)	sp|Q6PD62|CTR9_HUMAN	Q6PD62	CTR9_HUMAN	CTR9	RNA polymerase-associated protein CTR9 homolog			2	796728	MS/MS	STY:79.9663@GEEGS(0.9386)DDDET(0.0614)ENGPK;
GEEGSDDDETENGPKPK	GEEGS[79.9663]DDDETENGPKPK	K	K	966	982	17	2	5S(79.9663)	sp|Q6PD62|CTR9_HUMAN	Q6PD62	CTR9_HUMAN	CTR9	RNA polymerase-associated protein CTR9 homolog			3	494138	MS/MS	STY:79.9663@GEEGS(0.7722)DDDET(0.2278)ENGPKPK;
GEFSASPMLK	GEFS[79.9663]ASPMLK	R	S	1119	1128	10	2	4S(79.9663)	sp|Q9UQ35|SRRM2_HUMAN	Q9UQ35	SRRM2_HUMAN	SRRM2	Serine/arginine repetitive matrix protein 2			6	3.8919e+06	MS/MS	STY:79.9663@GEFS(0.6588)AS(0.3412)PMLK;
GEFSASPMLK	GEFS[79.9663]ASPM[15.9949]LK	R	S	1119	1128	10	2	4S(79.9663),8M(15.9949)	sp|Q9UQ35|SRRM2_HUMAN	Q9UQ35	SRRM2_HUMAN	SRRM2	Serine/arginine repetitive matrix protein 2			1	484299	MS/MS	STY:79.9663@GEFS(0.5000)AS(0.5000)PMLK;M:15.9949@GEFSASPM(1.0000)LK;
GEGDAPFSEPGTTSTQRPSSPETATK	GEGDAPFSEPGTTSTQRPS[79.9663]SPETATK	R	Q	304	329	26	3	19S(79.9663)	sp|Q9UQ35|SRRM2_HUMAN	Q9UQ35	SRRM2_HUMAN	SRRM2	Serine/arginine repetitive matrix protein 2			5	7481403	MS/MS	STY:79.9663@GEGDAPFS(0.0267)EPGT(0.0267)T(0.0267)S(0.0267)T(0.0267)QRPS(0.8185)S(0.0160)PET(0.0160)AT(0.0160)K;
GEGDAPFSEPGTTSTQRPSSPETATK	GEGDAPFSEPGTTS[79.9663]TQRPSSPETATK	R	Q	304	329	26	3	14S(79.9663)	sp|Q9UQ35|SRRM2_HUMAN	Q9UQ35	SRRM2_HUMAN	SRRM2	Serine/arginine repetitive matrix protein 2			3	5.88882e+06	MS/MS	STY:79.9663@GEGDAPFS(0.0207)EPGT(0.0207)T(0.0207)S(0.4349)T(0.4349)QRPS(0.0170)S(0.0170)PET(0.0170)AT(0.0170)K;
GEGDAPFSEPGTTSTQRPSSPETATK	GEGDAPFSEPGT[79.9663]TSTQRPSSPETATK	R	Q	304	329	26	3	12T(79.9663)	sp|Q9UQ35|SRRM2_HUMAN	Q9UQ35	SRRM2_HUMAN	SRRM2	Serine/arginine repetitive matrix protein 2			4	4644013	MS/MS	STY:79.9663@GEGDAPFS(0.0031)EPGT(0.2368)T(0.2368)S(0.2368)T(0.2368)QRPS(0.0124)S(0.0124)PET(0.0124)AT(0.0124)K;
GEGDAPFSEPGTTSTQRPSSPETATK	GEGDAPFS[79.9663]EPGTTSTQRPSSPETATK	R	Q	304	329	26	3	8S(79.9663)	sp|Q9UQ35|SRRM2_HUMAN	Q9UQ35	SRRM2_HUMAN	SRRM2	Serine/arginine repetitive matrix protein 2			1	1.72396e+06	MS/MS	STY:79.9663@GEGDAPFS(0.1111)EPGT(0.1111)T(0.1111)S(0.1111)T(0.1111)QRPS(0.1111)S(0.1111)PET(0.1111)AT(0.1111)K;
GEGSDSKESPK	GEGS[79.9663]DSKESPK	K	T	212	222	11	2	4S(79.9663)	sp|Q6PKG0|LARP1_HUMAN	Q6PKG0	LARP1_HUMAN	LARP1	La-related protein 1			2	203203	MS/MS	STY:79.9663@GEGS(0.3333)DS(0.3333)KES(0.3333)PK;
GEPAAAAAPEAGASPVEK	GEPAAAAAPEAGAS[79.9663]PVEK	K	E	88	105	18	2,3	14S(79.9663)	sp|P29966|MARCS_HUMAN	P29966	MARCS_HUMAN	MARCKS	Myristoylated alanine-rich C-kinase substrate			14	1.2124196E7	MS/MS	STY:79.9663@GEPAAAAAPEAGAS(1.0000)PVEK;
GEPNVSYICSR	GEPNVSYIC[57.0215]S[79.9663]R	R	Y	273	283	11	2	10S(79.9663),9C(57.0215)	sp|P49840|GSK3A_HUMAN	P49840	GSK3A_HUMAN	GSK3A	Glycogen synthase kinase-3 alpha	GSK3B	sp|P49841|GSK3B_HUMAN	1	1.75877e+06	MS/MS	STY:79.9663@GEPNVS(0.1114)Y(0.1114)ICS(0.7772)R;
GEPNVSYICSR	GEPNVSY[79.9663]IC[57.0215]SR	R	Y	273	283	11	2	7Y(79.9663),9C(57.0215)	sp|P49840|GSK3A_HUMAN	P49840	GSK3A_HUMAN	GSK3A	Glycogen synthase kinase-3 alpha	GSK3B	sp|P49841|GSK3B_HUMAN	4	1.0781476E7	MS/MS	STY:79.9663@GEPNVS(0.0172)Y(0.4914)ICS(0.4914)R;
GEPNVSYICSR	GEPNVS[79.9663]YIC[57.0215]SR	R	Y	273	283	11	2	6S(79.9663),9C(57.0215)	sp|P49840|GSK3A_HUMAN	P49840	GSK3A_HUMAN	GSK3A	Glycogen synthase kinase-3 alpha	GSK3B	sp|P49841|GSK3B_HUMAN	16	1.0781476E7	MS/MS	STY:79.9663@GEPNVS(0.9370)Y(0.0318)ICS(0.0313)R;
GEQVSQNGLPAEQGSPR	GEQVSQNGLPAEQGS[79.9663]PR	K	M	2124	2140	17	2	15S(79.9663)	sp|Q01082|SPTB2_HUMAN	Q01082	SPTB2_HUMAN	SPTBN1	Spectrin beta chain, non-erythrocytic 1			2	3169455	MS/MS	STY:79.9663@GEQVS(0.0561)QNGLPAEQGS(0.9439)PR;
GEQVSQNGLPAEQGSPR	GEQVS[79.9663]QNGLPAEQGSPR	K	M	2124	2140	17	2	5S(79.9663)	sp|Q01082|SPTB2_HUMAN	Q01082	SPTB2_HUMAN	SPTBN1	Spectrin beta chain, non-erythrocytic 1			5	3.21637e+06	MS/MS	STY:79.9663@GEQVS(0.9367)QNGLPAEQGS(0.0633)PR;
GESAPTLSTSPSPSSPSPTSPSPTLGR	GESAPTLSTSPSPSSPSPTSPSPT[79.9663]LGR	R	R	311	337	27	3	24T(79.9663)	sp|Q9H330|TM245_HUMAN	Q9H330	TM245_HUMAN	TMEM245	Transmembrane protein 245			1	0	MS/MS	STY:79.9663@GES(0.3435)APT(0.0068)LS(0.0068)T(0.0068)S(0.0068)PS(0.0068)PS(0.0068)S(0.0068)PS(0.0338)PT(0.0338)S(0.0338)PS(0.0338)PT(0.4738)LGR;
GESAPTLSTSPSPSSPSPTSPSPTLGR	GESAPTLSTSPSPSSPSPT[79.9663]SPSPTLGR	R	R	311	337	27	3	19T(79.9663)	sp|Q9H330|TM245_HUMAN	Q9H330	TM245_HUMAN	TMEM245	Transmembrane protein 245			2	2.33522e+06	MS/MS	STY:79.9663@GES(0.0078)APT(0.0136)LS(0.0057)T(0.0057)S(0.0058)PS(0.0058)PS(0.0060)S(0.0060)PS(0.0060)PT(0.9209)S(0.0055)PS(0.0055)PT(0.0055)LGR;
GESAPTLSTSPSPSSPSPTSPSPTLGR	GESAPTLSTSPSPSSPS[79.9663]PTSPSPTLGR	R	R	311	337	27	3	17S(79.9663)	sp|Q9H330|TM245_HUMAN	Q9H330	TM245_HUMAN	TMEM245	Transmembrane protein 245			1	1.43641e+06	MS/MS	STY:79.9663@GES(0.0255)APT(0.0255)LS(0.0255)T(0.0255)S(0.0255)PS(0.0255)PS(0.0255)S(0.0255)PS(0.2631)PT(0.2631)S(0.2631)PS(0.0032)PT(0.0032)LGR;
GESAPTLSTSPSPSSPSPTSPSPTLGR	GESAPTLSTSPSPS[79.9663]SPSPTSPSPTLGR	R	R	311	337	27	3	14S(79.9663)	sp|Q9H330|TM245_HUMAN	Q9H330	TM245_HUMAN	TMEM245	Transmembrane protein 245			1	898815	MS/MS	STY:79.9663@GES(0.0107)APT(0.0107)LS(0.0226)T(0.0226)S(0.0226)PS(0.0027)PS(0.1297)S(0.1297)PS(0.1297)PT(0.1297)S(0.1297)PS(0.1297)PT(0.1297)LGR;
GESLSLPGPSPPPDGTEQVIISR	GESLSLPGPSPPPDGT[79.9663]EQVIISR	K	V	637	659	23	3	16T(79.9663)	sp|Q9BZQ8|NIBA1_HUMAN	Q9BZQ8	NIBA1_HUMAN	NIBAN1	Protein Niban 1			1	683084	MS/MS	STY:79.9663@GES(0.0099)LS(0.0099)LPGPS(0.0163)PPPDGT(0.4820)EQVIIS(0.4820)R;
GESAPTLSTSPSPSSPSPTSPSPTLGR	GES[79.9663]APTLSTSPSPSSPSPTSPSPTLGR	R	R	311	337	27	3	3S(79.9663)	sp|Q9H330|TM245_HUMAN	Q9H330	TM245_HUMAN	TMEM245	Transmembrane protein 245			2	1.50073e+06	MS/MS	STY:79.9663@GES(0.1233)APT(0.1233)LS(0.1233)T(0.1233)S(0.1233)PS(0.1233)PS(0.1233)S(0.1233)PS(0.0029)PT(0.0029)S(0.0029)PS(0.0029)PT(0.0020)LGR;
GEVPPKETPK	GEVPPKET[79.9663]PK	K	K	78	87	10	2	8T(79.9663)	sp|P49006|MRP_HUMAN	P49006	MRP_HUMAN	MARCKSL1	MARCKS-related protein			8	699691	MS/MS	STY:79.9663@GEVPPKET(1.0000)PK;
GFGFGQGAGALVHSE	GFGFGQGAGALVHS[79.9663]E	K	-	179	193	15	2	14S(79.9663)	sp|P21291|CSRP1_HUMAN	P21291	CSRP1_HUMAN	CSRP1	Cysteine and glycine-rich protein 1			3	2.03284e+06	MS/MS	STY:79.9663@GFGFGQGAGALVHS(1.0000)E;
GFSDSGGGPPAK	GFSDS[79.9663]GGGPPAK	R	Q	64	75	12	2	5S(79.9663)	sp|Q9H307|PININ_HUMAN	Q9H307	PININ_HUMAN	PNN	Pinin			1	3.45512e+06	MS/MS	STY:79.9663@GFS(0.0770)DS(0.9230)GGGPPAK;
GFSVVADTPELQR	GFSVVADT[79.9663]PELQR	K	I	97	109	13	2	8T(79.9663)	sp|Q14847|LASP1_HUMAN	Q14847	LASP1_HUMAN	LASP1	LIM and SH3 domain protein 1			1	711705	MS/MS	STY:79.9663@GFS(0.0570)VVADT(0.9430)PELQR;
GFSDSGGGPPAK	GFS[79.9663]DSGGGPPAK	R	Q	64	75	12	2	3S(79.9663)	sp|Q9H307|PININ_HUMAN	Q9H307	PININ_HUMAN	PNN	Pinin			5	3.45512e+06	MS/MS	STY:79.9663@GFS(0.9389)DS(0.0611)GGGPPAK;
GGAPDPSPGATATPGAPAQPSSPDAR	GGAPDPSPGATATPGAPAQPS[79.9663]SPDAR	R	R	505	530	26	3	21S(79.9663)	sp|O95365|ZBT7A_HUMAN	O95365	ZBT7A_HUMAN	ZBTB7A	Zinc finger and BTB domain-containing protein 7A			3	1940055	MS/MS	STY:79.9663@GGAPDPS(0.0325)PGAT(0.0183)AT(0.0183)PGAPAQPS(0.8740)S(0.0568)PDAR;
GGEFDEFVNDDTDDDLPISK	GGEFDEFVNDDTDDDLPIS[79.9663]K	K	K	914	933	20	2	19S(79.9663)	sp|Q6PD62|CTR9_HUMAN	Q6PD62	CTR9_HUMAN	CTR9	RNA polymerase-associated protein CTR9 homolog			1	0	MS/MS	STY:79.9663@GGEFDEFVNDDT(0.4925)DDDLPIS(0.5075)K;
GGEFDEFVNDDTDDDLPISK	GGEFDEFVNDDT[79.9663]DDDLPISK	K	K	914	933	20	3	12T(79.9663)	sp|Q6PD62|CTR9_HUMAN	Q6PD62	CTR9_HUMAN	CTR9	RNA polymerase-associated protein CTR9 homolog			1	0	MS/MS	STY:79.9663@GGEFDEFVNDDT(0.5000)DDDLPIS(0.5000)K;
GGGGDMAEPSEAGDAPPDDGPPGELGPDGPDGPEEK	GGGGDMAEPS[79.9663]EAGDAPPDDGPPGELGPDGPDGPEEK	R	G	311	346	36	3	10S(79.9663)	sp|P08621|RU17_HUMAN	P08621	RU17_HUMAN	SNRNP70	U1 small nuclear ribonucleoprotein 70 kDa			8	5.67098e+06	MS/MS	STY:79.9663@GGGGDMAEPS(1.0000)EAGDAPPDDGPPGELGPDGPDGPEEK;
GGGGDMAEPSEAGDAPPDDGPPGELGPDGPDGPEEK	GGGGDM[15.9949]AEPS[79.9663]EAGDAPPDDGPPGELGPDGPDGPEEK	R	G	311	346	36	3	10S(79.9663),6M(15.9949)	sp|P08621|RU17_HUMAN	P08621	RU17_HUMAN	SNRNP70	U1 small nuclear ribonucleoprotein 70 kDa			3	1.7945e+06	MS/MS	STY:79.9663@GGGGDMAEPS(1.0000)EAGDAPPDDGPPGELGPDGPDGPEEK;M:15.9949@GGGGDM(1.0000)AEPSEAGDAPPDDGPPGELGPDGPDGPEEK;
GGGGGQDNGLEGLGNDSR	GGGGGQDNGLEGLGNDS[79.9663]R	R	D	394	411	18	2	17S(79.9663)	sp|P08621|RU17_HUMAN	P08621	RU17_HUMAN	SNRNP70	U1 small nuclear ribonucleoprotein 70 kDa			1	0	MS/MS	STY:79.9663@GGGGGQDNGLEGLGNDS(1.0000)R;
GGGSGGGEESEGEEVDED	GGGSGGGEES[79.9663]EGEEVDED	R	-	295	312	18	2	10S(79.9663)	sp|Q96QR8|PURB_HUMAN	Q96QR8	PURB_HUMAN	PURB	Transcriptional regulator protein Pur-beta			1	1.1238e+06	MS/MS	STY:79.9663@GGGS(0.2984)GGGEES(0.7016)EGEEVDED;
GGGTPDANSLAPPGK	GGGT[79.9663]PDANSLAPPGK	R	A	299	313	15	2	4T(79.9663)	sp|Q9BRQ0|PYGO2_HUMAN	Q9BRQ0	PYGO2_HUMAN	PYGO2	Pygopus homolog 2			2	0	MS/MS	STY:79.9663@GGGT(0.9431)PDANS(0.0569)LAPPGK;
GGLNTPLHESDFSGVTPQR	GGLNT[79.9663]PLHES[79.9663]DFSGVTPQR	K	Q	381	399	19	3	10S(79.9663),5T(79.9663)	sp|Q99459|CDC5L_HUMAN	Q99459	CDC5L_HUMAN	CDC5L	Cell division cycle 5-like protein			1	271370	MS/MS	STY:79.9663@GGLNT(0.5000)PLHES(0.5000)DFS(0.5000)GVT(0.5000)PQR;
GGLSPANDTGAK	GGLSPANDT[79.9663]GAK	R	K	44	55	12	2	9T(79.9663)	sp|P30419|NMT1_HUMAN	P30419	NMT1_HUMAN	NMT1	Glycylpeptide N-tetradecanoyltransferase 1			2	3.30036e+06	MS/MS	STY:79.9663@GGLS(0.0963)PANDT(0.9037)GAK;
GGLSPANDTGAK	GGLS[79.9663]PANDTGAK	R	K	44	55	12	2	4S(79.9663)	sp|P30419|NMT1_HUMAN	P30419	NMT1_HUMAN	NMT1	Glycylpeptide N-tetradecanoyltransferase 1			8	4.48417e+06	MS/MS	STY:79.9663@GGLS(0.9461)PANDT(0.0539)GAK;
GGNLPPVSPNDSGAK	GGNLPPVS[79.9663]PNDSGAK	K	I	1096	1110	15	2	8S(79.9663)	sp|Q9UK61|TASOR_HUMAN	Q9UK61	TASOR_HUMAN	TASOR	Protein TASOR			1	0	MS/MS	STY:79.9663@GGNLPPVS(0.5000)PNDS(0.5000)GAK;
GGNVFAALIQDQSEEEEEEEK	GGNVFAALIQDQS[79.9663]EEEEEEEK	K	H	128	148	21	2,3	13S(79.9663)	sp|Q8NE71|ABCF1_HUMAN	Q8NE71	ABCF1_HUMAN	ABCF1	ATP-binding cassette sub-family F member 1			5	0	MS/MS	STY:79.9663@GGNVFAALIQDQS(1.0000)EEEEEEEK;
GGSTSSSPSR	GGSTS[79.9663]SSPSR	K	R	65	74	10	2	5S(79.9663)	sp|Q14739|LBR_HUMAN	Q14739	LBR_HUMAN	LBR	Delta(14)-sterol reductase LBR			1	398455	MS/MS	STY:79.9663@GGS(0.0044)T(0.0044)S(0.2478)S(0.2478)S(0.2478)PS(0.2478)R;
GGSGSGPTIEEVD	GGS[79.9663]GSGPTIEEVD	K	-	629	641	13	2	3S(79.9663)	sp|P0DMV8|HS71A_HUMAN	P0DMV8	HS71A_HUMAN	HSPA1A	Heat shock 70 kDa protein 1A	HSPA1B	sp|P0DMV9|HS71B_HUMAN	1	660812	MS/MS	STY:79.9663@GGS(0.3333)GS(0.3333)GPT(0.3333)IEEVD;
GGSTSSSPSR	GGS[79.9663]TSSSPSR	K	R	65	74	10	2	3S(79.9663)	sp|Q14739|LBR_HUMAN	Q14739	LBR_HUMAN	LBR	Delta(14)-sterol reductase LBR			1	398455	MS/MS	STY:79.9663@GGS(0.1667)T(0.1667)S(0.1667)S(0.1667)S(0.1667)PS(0.1667)R;
GGVTGSPEASISGSK	GGVTGSPEASISGS[79.9663]K	K	G	5726	5740	15	2	14S(79.9663)	sp|Q09666|AHNK_HUMAN	Q09666	AHNK_HUMAN	AHNAK	Neuroblast differentiation-associated protein AHNAK			2	3.23649e+06	MS/MS	STY:79.9663@GGVT(0.0298)GS(0.0298)PEAS(0.0298)IS(0.0178)GS(0.8929)K;
GGVTGSPEASISGSK	GGVTGSPEAS[79.9663]ISGSK	K	G	5726	5740	15	2	10S(79.9663)	sp|Q09666|AHNK_HUMAN	Q09666	AHNK_HUMAN	AHNAK	Neuroblast differentiation-associated protein AHNAK			4	1.1308456E7	MS/MS	STY:79.9663@GGVT(0.0362)GS(0.0362)PEAS(0.8955)IS(0.0160)GS(0.0160)K;
GGVTGSPEASISGSK	GGVTGS[79.9663]PEASISGSK	K	G	5726	5740	15	2	6S(79.9663)	sp|Q09666|AHNK_HUMAN	Q09666	AHNK_HUMAN	AHNAK	Neuroblast differentiation-associated protein AHNAK			3	1.1308456E7	MS/MS	STY:79.9663@GGVT(0.0140)GS(0.9430)PEAS(0.0139)IS(0.0139)GS(0.0151)K;
GGVTGSPEASISGSK	GGVT[79.9663]GSPEASISGSK	K	G	5726	5740	15	2	4T(79.9663)	sp|Q09666|AHNK_HUMAN	Q09666	AHNK_HUMAN	AHNAK	Neuroblast differentiation-associated protein AHNAK			6	1.3823514E7	MS/MS	STY:79.9663@GGVT(0.9017)GS(0.0277)PEAS(0.0387)IS(0.0159)GS(0.0159)K;
GHYEVTGSDDETGK	GHYEVTGSDDET[79.9663]GK	K	L	5834	5847	14	2	12T(79.9663)	sp|Q09666|AHNK_HUMAN	Q09666	AHNK_HUMAN	AHNAK	Neuroblast differentiation-associated protein AHNAK			1	0	MS/MS	STY:79.9663@GHY(0.0197)EVT(0.0236)GS(0.0680)DDET(0.8888)GK;
GHYEVTGSDDETGK	GHYEVTGS[79.9663]DDETGK	K	L	5834	5847	14	2	8S(79.9663)	sp|Q09666|AHNK_HUMAN	Q09666	AHNK_HUMAN	AHNAK	Neuroblast differentiation-associated protein AHNAK			1	0	MS/MS	STY:79.9663@GHY(0.0383)EVT(0.0151)GS(0.4733)DDET(0.4733)GK;
GHYEVTGSDDETGK	GHYEVT[79.9663]GSDDETGK	K	L	5834	5847	14	2	6T(79.9663)	sp|Q09666|AHNK_HUMAN	Q09666	AHNK_HUMAN	AHNAK	Neuroblast differentiation-associated protein AHNAK			1	0	MS/MS	STY:79.9663@GHY(0.0200)EVT(0.4438)GS(0.4438)DDET(0.0923)GK;
GHYEVTGSDDETGK	GHY[79.9663]EVTGSDDETGK	K	L	5834	5847	14	2	3Y(79.9663)	sp|Q09666|AHNK_HUMAN	Q09666	AHNK_HUMAN	AHNAK	Neuroblast differentiation-associated protein AHNAK			3	0	MS/MS	STY:79.9663@GHY(0.2500)EVT(0.2500)GS(0.2500)DDET(0.2500)GK;
GILAADESTGSIAK	GILAADES[79.9663]TGSIAK	K	R	29	42	14	2	8S(79.9663)	sp|P04075|ALDOA_HUMAN	P04075	ALDOA_HUMAN	ALDOA	Fructose-bisphosphate aldolase A			3	1.65562e+06	MS/MS	STY:79.9663@GILAADES(0.4441)T(0.4441)GS(0.1117)IAK;
GIPLATGDTSPEPELLPGAPLPPPK	GIPLATGDT[79.9663]SPEPELLPGAPLPPPK	K	E	33	57	25	3	9T(79.9663)	sp|O75821|EIF3G_HUMAN	O75821	EIF3G_HUMAN	EIF3G	Eukaryotic translation initiation factor 3 subunit G			3	1.6827684E7	MS/MS	STY:79.9663@GIPLAT(0.0182)GDT(0.4909)S(0.4909)PEPELLPGAPLPPPK;
GIPLATGDTSPEPELLPGAPLPPPK	GIPLAT[79.9663]GDTSPEPELLPGAPLPPPK	K	E	33	57	25	3	6T(79.9663)	sp|O75821|EIF3G_HUMAN	O75821	EIF3G_HUMAN	EIF3G	Eukaryotic translation initiation factor 3 subunit G			9	1.6827684E7	MS/MS	STY:79.9663@GIPLAT(0.9413)GDT(0.0293)S(0.0293)PEPELLPGAPLPPPK;
GIQLYDTPYEPEGQSVDSDSESTVSPR	GIQLYDTPYEPEGQSVDSDS[79.9663]ESTVSPR	K	L	293	319	27	3	20S(79.9663)	sp|Q15464|SHB_HUMAN	Q15464	SHB_HUMAN	SHB	SH2 domain-containing adapter protein B			1	0	MS/MS	STY:79.9663@GIQLY(0.0063)DT(0.0063)PY(0.0063)EPEGQS(0.0082)VDS(0.0082)DS(0.2412)ES(0.2412)T(0.2412)VS(0.2412)PR;
GISSSNEGVEEPSK	GISS[79.9663]SNEGVEEPSK	R	K	129	142	14	2	4S(79.9663)	sp|Q9NXV6|CARF_HUMAN	Q9NXV6	CARF_HUMAN	CDKN2AIP	CDKN2A-interacting protein			1	484291	MS/MS	STY:79.9663@GIS(0.1275)S(0.8163)S(0.0294)NEGVEEPS(0.0268)K;
GISPIVFDR	GIS[79.9663]PIVFDR	R	S	306	314	9	2	3S(79.9663)	sp|Q96MU7|YTDC1_HUMAN	Q96MU7	YTDC1_HUMAN	YTHDC1	YTH domain-containing protein 1			4	1.09506e+06	MS/MS	STY:79.9663@GIS(1.0000)PIVFDR;
GISSSNEGVEEPSK	GIS[79.9663]SSNEGVEEPSK	R	K	129	142	14	2	3S(79.9663)	sp|Q9NXV6|CARF_HUMAN	Q9NXV6	CARF_HUMAN	CDKN2AIP	CDKN2A-interacting protein			2	817822	MS/MS	STY:79.9663@GIS(0.3299)S(0.3299)S(0.3299)NEGVEEPS(0.0103)K;
GKLSAEENPDDSEVPSSSGINSTK	GKLSAEENPDDS[79.9663]EVPSSSGINSTK	K	S	40	63	24	3	12S(79.9663)	sp|Q9Y5Q9|TF3C3_HUMAN	Q9Y5Q9	TF3C3_HUMAN	GTF3C3	General transcription factor 3C polypeptide 3			1	647421	MS/MS	STY:79.9663@GKLS(0.0395)AEENPDDS(0.8499)EVPS(0.0221)S(0.0221)S(0.0221)GINS(0.0221)T(0.0221)K;
GKLSAEENPDDSEVPSSSGINSTK	GKLS[79.9663]AEENPDDSEVPSSSGINSTK	K	S	40	63	24	3	4S(79.9663)	sp|Q9Y5Q9|TF3C3_HUMAN	Q9Y5Q9	TF3C3_HUMAN	GTF3C3	General transcription factor 3C polypeptide 3			3	647421	MS/MS	STY:79.9663@GKLS(0.9269)AEENPDDS(0.0129)EVPS(0.0121)S(0.0121)S(0.0121)GINS(0.0121)T(0.0121)K;
GLAEVQQDGEAEEGATSDGEK	GLAEVQQDGEAEEGATS[79.9663]DGEK	K	K	582	602	21	2,3	17S(79.9663)	sp|Q02952|AKA12_HUMAN	Q02952	AKA12_HUMAN	AKAP12	A-kinase anchor protein 12			2	5.40142e+06	MS/MS	STY:79.9663@GLAEVQQDGEAEEGAT(0.0611)S(0.9389)DGEK;
GLAEVQQDGEAEEGATSDGEK	GLAEVQQDGEAEEGAT[79.9663]SDGEK	K	K	582	602	21	2	16T(79.9663)	sp|Q02952|AKA12_HUMAN	Q02952	AKA12_HUMAN	AKAP12	A-kinase anchor protein 12			5	5.40142e+06	MS/MS	STY:79.9663@GLAEVQQDGEAEEGAT(0.5000)S(0.5000)DGEK;
GLAGPPASPGK	GLAGPPAS[79.9663]PGK	K	A	538	548	11	2	8S(79.9663)	sp|Q9P206|NHSL3_HUMAN	Q9P206	NHSL3_HUMAN	NHSL3	NHS-like protein 3			3	1.09407e+06	MS/MS	STY:79.9663@GLAGPPAS(1.0000)PGK;
GLGAGAGAGEESPATSLPR	GLGAGAGAGEESPAT[79.9663]SLPR	R	M	79	97	19	2	15T(79.9663)	sp|O15173|PGRC2_HUMAN	O15173	PGRC2_HUMAN	PGRMC2	Membrane-associated progesterone receptor component 2			1	1310455	MS/MS	STY:79.9663@GLGAGAGAGEES(0.0428)PAT(0.4786)S(0.4786)LPR;
GLGAGAGAGEESPATSLPR	GLGAGAGAGEES[79.9663]PATSLPR	R	M	79	97	19	2	12S(79.9663)	sp|O15173|PGRC2_HUMAN	O15173	PGRC2_HUMAN	PGRMC2	Membrane-associated progesterone receptor component 2			2	1310455	MS/MS	STY:79.9663@GLGAGAGAGEES(0.9434)PAT(0.0283)S(0.0283)LPR;
GLGPPSPPAPPR	GLGPPS[79.9663]PPAPPR	R	G	90	101	12	2	6S(79.9663)	sp|Q13425|SNTB2_HUMAN	Q13425	SNTB2_HUMAN	SNTB2	Beta-2-syntrophin			14	6807386	MS/MS	STY:79.9663@GLGPPS(1.0000)PPAPPR;
GLLAQGLRPESPPPAGPLLNGAPAGESPQPK	GLLAQGLRPESPPPAGPLLNGAPAGES[79.9663]PQPK	R	A	655	685	31	3	27S(79.9663)	sp|Q96TA1|NIBA2_HUMAN	Q96TA1	NIBA2_HUMAN	NIBAN2	Protein Niban 2			3	9202304	MS/MS	STY:79.9663@GLLAQGLRPES(0.0597)PPPAGPLLNGAPAGES(0.9403)PQPK;
GLLAQGLRPESPPPAGPLLNGAPAGESPQPK	GLLAQGLRPES[79.9663]PPPAGPLLNGAPAGESPQPK	R	A	655	685	31	3	11S(79.9663)	sp|Q96TA1|NIBA2_HUMAN	Q96TA1	NIBA2_HUMAN	NIBAN2	Protein Niban 2			13	1.4713018E7	MS/MS	STY:79.9663@GLLAQGLRPES(0.9467)PPPAGPLLNGAPAGES(0.0533)PQPK;
GLLAQGLRPESPPPAGPLLNGAPAGESPQPK	GLLAQGLRPES[79.9663]PPPAGPLLNGAPAGES[79.9663]PQPK	R	A	655	685	31	3	11S(79.9663),27S(79.9663)	sp|Q96TA1|NIBA2_HUMAN	Q96TA1	NIBA2_HUMAN	NIBAN2	Protein Niban 2			7	5419365	MS/MS	STY:79.9663@GLLAQGLRPES(1.0000)PPPAGPLLNGAPAGES(1.0000)PQPK;
GLLSDSMTDVPVDTGVAAR	GLLSDSMTDVPVDT[79.9663]GVAAR	K	T	16	34	19	2	14T(79.9663)	sp|O43399|TPD54_HUMAN	O43399	TPD54_HUMAN	TPD52L2	Tumor protein D54			1	0	MS/MS	STY:79.9663@GLLS(0.0192)DS(0.0192)MT(0.0192)DVPVDT(0.9425)GVAAR;
GLLSDSMTDVPVDTGVAAR	GLLS[79.9663]DSMTDVPVDTGVAAR	K	T	16	34	19	2	4S(79.9663)	sp|O43399|TPD54_HUMAN	O43399	TPD54_HUMAN	TPD52L2	Tumor protein D54			1	0	MS/MS	STY:79.9663@GLLS(0.4818)DS(0.4818)MT(0.0121)DVPVDT(0.0244)GVAAR;
GLLYDSDEEDEERPAR	GLLYDS[79.9663]DEEDEERPAR	R	K	134	149	16	2,3	6S(79.9663)	sp|P49736|MCM2_HUMAN	P49736	MCM2_HUMAN	MCM2	DNA replication licensing factor MCM2			7	7.037e+06	MS/MS	STY:79.9663@GLLY(0.0565)DS(0.9435)DEEDEERPAR;
GLLYDSDEEDEERPAR	GLLY[79.9663]DSDEEDEERPAR	R	K	134	149	16	2,3	4Y(79.9663)	sp|P49736|MCM2_HUMAN	P49736	MCM2_HUMAN	MCM2	DNA replication licensing factor MCM2			12	6896781	MS/MS	STY:79.9663@GLLY(0.9367)DS(0.0633)DEEDEERPAR;
GLNPDGTPALSTLGGFSPASKPSSPR	GLNPDGT[79.9663]PALS[79.9663]TLGGFSPASKPSSPR	K	E	319	344	26	3	11S(79.9663),7T(79.9663)	sp|Q9UK58|CCNL1_HUMAN	Q9UK58	CCNL1_HUMAN	CCNL1	Cyclin-L1			1	1147633	MS/MS	STY:79.9663@GLNPDGT(0.3843)PALS(0.3843)T(0.3843)LGGFS(0.1337)PAS(0.2378)KPS(0.2378)S(0.2378)PR;
GLPPSMER	GLPPS[79.9663]MER	R	G	348	355	8	2	5S(79.9663)	sp|P38159|RBMX_HUMAN	P38159	RBMX_HUMAN	RBMX	RNA-binding motif protein, X chromosome			15	1.41692e+06	MS/MS	STY:79.9663@GLPPS(1.0000)MER;
GLRDSHSSEEDEASSQTDLSQTISK	GLRDS[79.9663]HSSEEDEASSQTDLSQT[79.9663]IS[79.9663]K	R	K	150	174	25	3	22T(79.9663),24S(79.9663),5S(79.9663)	sp|Q5JTV8|TOIP1_HUMAN	Q5JTV8	TOIP1_HUMAN	TOR1AIP1	Torsin-1A-interacting protein 1			1	0	MS/MS	STY:79.9663@GLRDS(0.3236)HS(0.3236)S(0.3236)EEDEAS(0.3236)S(0.3236)QT(0.3236)DLS(0.3236)QT(0.3675)IS(0.3675)K;
GLSASTMDLSSSS	GLS[79.9663]ASTMDLSSSS	R	-	607	619	13	2	3S(79.9663)	sp|Q9NSK0|KLC4_HUMAN	Q9NSK0	KLC4_HUMAN	KLC4	Kinesin light chain 4			1	947594	MS/MS	STY:79.9663@GLS(0.3231)AS(0.3231)T(0.3231)MDLS(0.0077)S(0.0077)S(0.0077)S(0.0077);
GLSGEEEDDEPDCCNDER	GLS[79.9663]GEEEDDEPDC[57.0215]C[57.0215]NDER	R	Y	130	147	18	2	13C(57.0215),14C(57.0215),3S(79.9663)	sp|Q6P158|DHX57_HUMAN	Q6P158	DHX57_HUMAN	DHX57	Putative ATP-dependent RNA helicase DHX57			1	1216532	MS/MS	STY:79.9663@GLS(1.0000)GEEEDDEPDCCNDER;
GLSVDSAQEVK	GLS[79.9663]VDSAQEVK	R	R	2049	2059	11	2	3S(79.9663)	sp|Q9Y4A5|TRRAP_HUMAN	Q9Y4A5	TRRAP_HUMAN	TRRAP	Transformation/transcription domain-associated protein			2	1.08062e+06	MS/MS	STY:79.9663@GLS(0.9432)VDS(0.0568)AQEVK;
GLVAAYSGDSDNEEELVER	GLVAAYSGDS[79.9663]DNEEELVER	R	L	615	633	19	2	10S(79.9663)	sp|P52756|RBM5_HUMAN	P52756	RBM5_HUMAN	RBM5	RNA-binding protein 5			2	4.00905e+06	MS/MS	STY:79.9663@GLVAAY(0.0286)S(0.0321)GDS(0.9393)DNEEELVER;
GLVAAYSGDSDNEEELVER	GLVAAY[79.9663]SGDSDNEEELVER	R	L	615	633	19	2	6Y(79.9663)	sp|P52756|RBM5_HUMAN	P52756	RBM5_HUMAN	RBM5	RNA-binding protein 5			2	4.00905e+06	MS/MS	STY:79.9663@GLVAAY(0.3333)S(0.3333)GDS(0.3333)DNEEELVER;
GLVAAYSGESDSEEEQER	GLVAAY[79.9663]SGESDSEEEQER	R	G	727	744	18	2	6Y(79.9663)	sp|P98175|RBM10_HUMAN	P98175	RBM10_HUMAN	RBM10	RNA-binding protein 10			2	1.0725e+06	MS/MS	STY:79.9663@GLVAAY(0.9019)S(0.0293)GES(0.0257)DS(0.0431)EEEQER;
GLYDGPVCEVSVTPK	GLYDGPVC[57.0215]EVSVT[79.9663]PK	R	T	497	511	15	2	13T(79.9663),8C(57.0215)	sp|Q16555|DPYL2_HUMAN	Q16555	DPYL2_HUMAN	DPYSL2	Dihydropyrimidinase-related protein 2			1	1.96035e+06	MS/MS	STY:79.9663@GLY(0.0776)DGPVCEVS(0.1037)VT(0.8187)PK;
GLYDGPVCEVSVTPK	GLYDGPVC[57.0215]EVS[79.9663]VTPK	R	T	497	511	15	2	11S(79.9663),8C(57.0215)	sp|Q16555|DPYL2_HUMAN	Q16555	DPYL2_HUMAN	DPYSL2	Dihydropyrimidinase-related protein 2			2	1.96035e+06	MS/MS	STY:79.9663@GLY(0.0503)DGPVCEVS(0.4749)VT(0.4749)PK;
GMYDGPVFDLTTTPK	GMYDGPVFDLTT[79.9663]TPK	R	G	497	511	15	2	12T(79.9663)	sp|Q14195|DPYL3_HUMAN	Q14195	DPYL3_HUMAN	DPYSL3	Dihydropyrimidinase-related protein 3			1	0	MS/MS	STY:79.9663@GMY(0.0294)DGPVFDLT(0.0124)T(0.4791)T(0.4791)PK;
GMYDGPVFDLTTTPK	GMYDGPVFDLT[79.9663]TTPK	R	G	497	511	15	2	11T(79.9663)	sp|Q14195|DPYL3_HUMAN	Q14195	DPYL3_HUMAN	DPYSL3	Dihydropyrimidinase-related protein 3			1	0	MS/MS	STY:79.9663@GMY(0.0084)DGPVFDLT(0.3305)T(0.3305)T(0.3305)PK;
GNAEGSSDEEGK	GNAEGS[79.9663]SDEEGK	K	L	127	138	12	2	6S(79.9663)	sp|P51858|HDGF_HUMAN	P51858	HDGF_HUMAN	HDGF	Hepatoma-derived growth factor			1	125084	MS/MS	STY:79.9663@GNAEGS(0.5000)S(0.5000)DEEGK;
GNDPLTSSPGR	GNDPLTSS[79.9663]PGR	R	S	20	30	11	2	8S(79.9663)	sp|P49736|MCM2_HUMAN	P49736	MCM2_HUMAN	MCM2	DNA replication licensing factor MCM2			5	1.1690303E7	MS/MS	STY:79.9663@GNDPLT(0.0274)S(0.0274)S(0.9452)PGR;
GNDPLTSSPGR	GNDPLTS[79.9663]SPGR	R	S	20	30	11	2	7S(79.9663)	sp|P49736|MCM2_HUMAN	P49736	MCM2_HUMAN	MCM2	DNA replication licensing factor MCM2			2	1.1690303E7	MS/MS	STY:79.9663@GNDPLT(0.0167)S(0.4917)S(0.4917)PGR;
GNDPLTSSPGR	GNDPLT[79.9663]SSPGR	R	S	20	30	11	2	6T(79.9663)	sp|P49736|MCM2_HUMAN	P49736	MCM2_HUMAN	MCM2	DNA replication licensing factor MCM2			23	1.4756164E7	MS/MS	STY:79.9663@GNDPLT(0.6674)S(0.1663)S(0.1663)PGR;
GNDSDGEGESDDPEK	GNDS[79.9663]DGEGESDDPEK	K	K	99	113	15	2	4S(79.9663)	sp|O75351|VPS4B_HUMAN	O75351	VPS4B_HUMAN	VPS4B	Vacuolar protein sorting-associated protein 4B			2	790342	MS/MS	STY:79.9663@GNDS(0.8039)DGEGES(0.1961)DDPEK;
GNIETTSEDGQVFSPK	GNIETTSEDGQVFS[79.9663]PK	R	K	980	995	16	2	14S(79.9663)	sp|Q5T200|ZC3HD_HUMAN	Q5T200	ZC3HD_HUMAN	ZC3H13	Zinc finger CCCH domain-containing protein 13			3	829465	MS/MS	STY:79.9663@GNIET(0.0269)T(0.0269)S(0.0269)EDGQVFS(0.9193)PK;
GNSPPSSGEACR	GNS[79.9663]PPSSGEAC[57.0215]R	K	E	184	195	12	2	11C(57.0215),3S(79.9663)	sp|P41227|NAA10_HUMAN	P41227	NAA10_HUMAN	NAA10	N-alpha-acetyltransferase 10			3	560135	MS/MS	STY:79.9663@GNS(0.9113)PPS(0.0443)S(0.0443)GEACR;
GNVFSSPTAAGTPNK	GNVFS[79.9663]SPTAAGTPNK	K	E	719	733	15	2	5S(79.9663)	sp|Q05682|CALD1_HUMAN	Q05682	CALD1_HUMAN	CALD1	Caldesmon			1	0	MS/MS	STY:79.9663@GNVFS(0.3273)S(0.3273)PT(0.3273)AAGT(0.0181)PNK;
GNVVPSPLPTR	GNVVPSPLPT[79.9663]R	R	R	36	46	11	2	10T(79.9663)	sp|Q9Y2V2|CHSP1_HUMAN	Q9Y2V2	CHSP1_HUMAN	CARHSP1	Calcium-regulated heat-stable protein 1			5	2.4861112E7	MS/MS	STY:79.9663@GNVVPS(0.0537)PLPT(0.9463)R;
GNVVPSPLPTR	GNVVPS[79.9663]PLPTR	R	R	36	46	11	2	6S(79.9663)	sp|Q9Y2V2|CHSP1_HUMAN	Q9Y2V2	CHSP1_HUMAN	CARHSP1	Calcium-regulated heat-stable protein 1			18	2.4167232E7	MS/MS	STY:79.9663@GNVVPS(0.9466)PLPT(0.0534)R;
GPAESPDEGITTTEGEGECEQTPEELEPVEK	GPAES[79.9663]PDEGITTTEGEGEC[57.0215]EQTPEELEPVEK	K	Q	887	917	31	3	19C(57.0215),5S(79.9663)	sp|P46821|MAP1B_HUMAN	P46821	MAP1B_HUMAN	MAP1B	Microtubule-associated protein 1B			1	0	MS/MS	STY:79.9663@GPAES(0.4067)PDEGIT(0.1985)T(0.1316)T(0.1316)EGEGECEQT(0.1316)PEELEPVEK;
GPAGEAGASPPVR	GPAGEAGAS[79.9663]PPVR	R	R	102	114	13	2	9S(79.9663)	sp|Q13425|SNTB2_HUMAN	Q13425	SNTB2_HUMAN	SNTB2	Beta-2-syntrophin			7	2.04861e+06	MS/MS	STY:79.9663@GPAGEAGAS(1.0000)PPVR;
GPDEAMEDGEEGSDDEAEWVVTK	GPDEAMEDGEEGSDDEAEWVVT[79.9663]K	R	D	426	448	23	2,3	22T(79.9663)	sp|Q9NZN4|EHD2_HUMAN	Q9NZN4	EHD2_HUMAN	EHD2	EH domain-containing protein 2			2	9136768	MS/MS	STY:79.9663@GPDEAMEDGEEGS(0.1002)DDEAEWVVT(0.8998)K;
GPDEAMEDGEEGSDDEAEWVVTK	GPDEAMEDGEEGS[79.9663]DDEAEWVVTK	R	D	426	448	23	2,3	13S(79.9663)	sp|Q9NZN4|EHD2_HUMAN	Q9NZN4	EHD2_HUMAN	EHD2	EH domain-containing protein 2			7	9305784	MS/MS	STY:79.9663@GPDEAMEDGEEGS(0.9442)DDEAEWVVT(0.0558)K;
GPDEAMEDGEEGSDDEAEWVVTK	GPDEAM[15.9949]EDGEEGS[79.9663]DDEAEWVVTK	R	D	426	448	23	3	13S(79.9663),6M(15.9949)	sp|Q9NZN4|EHD2_HUMAN	Q9NZN4	EHD2_HUMAN	EHD2	EH domain-containing protein 2			2	1.09498e+06	MS/MS	STY:79.9663@GPDEAMEDGEEGS(0.9362)DDEAEWVVT(0.0638)K;M:15.9949@GPDEAM(1.0000)EDGEEGSDDEAEWVVTK;
GPGEPDSPTPLHPPTPPILSTDR	GPGEPDS[79.9663]PT[79.9663]PLHPPTPPILSTDR	K	S	1831	1853	23	3	7S(79.9663),9T(79.9663)	sp|Q03164|KMT2A_HUMAN	Q03164	KMT2A_HUMAN	KMT2A	Histone-lysine N-methyltransferase 2A			1	341993	MS/MS	STY:79.9663@GPGEPDS(0.4867)PT(0.4867)PLHPPT(0.0532)PPILS(0.4867)T(0.4867)DR;
GPGQPSSPQR	GPGQPS[79.9663]SPQR	K	L	189	198	10	2	6S(79.9663)	sp|O95400|CD2B2_HUMAN	O95400	CD2B2_HUMAN	CD2BP2	CD2 antigen cytoplasmic tail-binding protein 2			3	376438	MS/MS	STY:79.9663@GPGQPS(0.5000)S(0.5000)PQR;
GPKPEPPGSGSPAPPR	GPKPEPPGS[79.9663]GSPAPPR	R	R	730	745	16	2	9S(79.9663)	sp|Q9UKJ3|GPTC8_HUMAN	Q9UKJ3	GPTC8_HUMAN	GPATCH8	G patch domain-containing protein 8			1	728438	MS/MS	STY:79.9663@GPKPEPPGS(0.5000)GS(0.5000)PAPPR;
GPPASSPAPAPK	GPPAS[79.9663]SPAPAPK	R	F	254	265	12	2	5S(79.9663)	sp|Q15942|ZYX_HUMAN	Q15942	ZYX_HUMAN	ZYX	Zyxin			6	1.17886e+06	MS/MS	STY:79.9663@GPPAS(0.5000)S(0.5000)PAPAPK;
GPPDFSSDEEREPTPVLGSGAAAAGR	GPPDFSSDEEREPTPVLGS[79.9663]GAAAAGR	K	S	61	86	26	3	19S(79.9663)	sp|P42167|LAP2B_HUMAN	P42167	LAP2B_HUMAN	TMPO	Lamina-associated polypeptide 2, isoforms beta/gamma		sp|P42166|LAP2A_HUMAN	4	8098321	MS/MS	STY:79.9663@GPPDFS(0.0285)S(0.0285)DEEREPT(0.0353)PVLGS(0.9076)GAAAAGR;
GPPDFSSDEEREPTPVLGSGAAAAGR	GPPDFSSDEEREPT[79.9663]PVLGSGAAAAGR	K	S	61	86	26	3	14T(79.9663)	sp|P42167|LAP2B_HUMAN	P42167	LAP2B_HUMAN	TMPO	Lamina-associated polypeptide 2, isoforms beta/gamma		sp|P42166|LAP2A_HUMAN	13	7.73234e+06	MS/MS	STY:79.9663@GPPDFS(0.0364)S(0.0364)DEEREPT(0.9064)PVLGS(0.0208)GAAAAGR;
GPPDFSSDEEREPTPVLGSGAAAAGR	GPPDFSSDEEREPT[79.9663]PVLGS[79.9663]GAAAAGR	K	S	61	86	26	3	14T(79.9663),19S(79.9663)	sp|P42167|LAP2B_HUMAN	P42167	LAP2B_HUMAN	TMPO	Lamina-associated polypeptide 2, isoforms beta/gamma		sp|P42166|LAP2A_HUMAN	1	713928	MS/MS	STY:79.9663@GPPDFS(0.3336)S(0.3336)DEEREPT(0.6664)PVLGS(0.6664)GAAAAGR;
GPPDFSSDEEREPTPVLGSGAAAAGR	GPPDFSS[79.9663]DEEREPTPVLGSGAAAAGR	K	S	61	86	26	3	7S(79.9663)	sp|P42167|LAP2B_HUMAN	P42167	LAP2B_HUMAN	TMPO	Lamina-associated polypeptide 2, isoforms beta/gamma		sp|P42166|LAP2A_HUMAN	2	3.81161e+06	MS/MS	STY:79.9663@GPPDFS(0.0381)S(0.9234)DEEREPT(0.0193)PVLGS(0.0193)GAAAAGR;
GPPDFSSDEEREPTPVLGSGAAAAGR	GPPDFS[79.9663]SDEEREPTPVLGSGAAAAGR	K	S	61	86	26	3	6S(79.9663)	sp|P42167|LAP2B_HUMAN	P42167	LAP2B_HUMAN	TMPO	Lamina-associated polypeptide 2, isoforms beta/gamma		sp|P42166|LAP2A_HUMAN	13	8098321	MS/MS	STY:79.9663@GPPDFS(0.9345)S(0.0249)DEEREPT(0.0214)PVLGS(0.0192)GAAAAGR;
GPPDFSSDEEREPTPVLGSGAAAAGR	GPPDFS[79.9663]SDEEREPTPVLGS[79.9663]GAAAAGR	K	S	61	86	26	3	19S(79.9663),6S(79.9663)	sp|P42167|LAP2B_HUMAN	P42167	LAP2B_HUMAN	TMPO	Lamina-associated polypeptide 2, isoforms beta/gamma		sp|P42166|LAP2A_HUMAN	2	2.64327e+06	MS/MS	STY:79.9663@GPPDFS(0.6161)S(0.6161)DEEREPT(0.1021)PVLGS(0.6656)GAAAAGR;
GPPDFSSDEEREPTPVLGSGAAAAGR	GPPDFS[79.9663]S[79.9663]DEEREPTPVLGSGAAAAGR	K	S	61	86	26	3	6S(79.9663),7S(79.9663)	sp|P42167|LAP2B_HUMAN	P42167	LAP2B_HUMAN	TMPO	Lamina-associated polypeptide 2, isoforms beta/gamma		sp|P42166|LAP2A_HUMAN	4	2.64327e+06	MS/MS	STY:79.9663@GPPDFS(0.7427)S(0.7427)DEEREPT(0.2573)PVLGS(0.2573)GAAAAGR;
GPPQSPVFEGVYNNSR	GPPQS[79.9663]PVFEGVYNNSR	K	M	107	122	16	2	5S(79.9663)	sp|Q8WWM7|ATX2L_HUMAN	Q8WWM7	ATX2L_HUMAN	ATXN2L	Ataxin-2-like protein			2	1.19259e+06	MS/MS	STY:79.9663@GPPQS(0.9443)PVFEGVY(0.0279)NNS(0.0279)R;
GPPSPPAPVMHSPSR	GPPSPPAPVMHS[79.9663]PS[79.9663]R	R	K	221	235	15	2	12S(79.9663),14S(79.9663)	sp|Q13573|SNW1_HUMAN	Q13573	SNW1_HUMAN	SNW1	SNW domain-containing protein 1			1	944461	MS/MS	STY:79.9663@GPPS(0.5859)PPAPVMHS(0.7101)PS(0.7041)R;
GPPSPPAPVMHSPSR	GPPS[79.9663]PPAPVMHSPS[79.9663]R	R	K	221	235	15	2	14S(79.9663),4S(79.9663)	sp|Q13573|SNW1_HUMAN	Q13573	SNW1_HUMAN	SNW1	SNW domain-containing protein 1			2	2295650	MS/MS	STY:79.9663@GPPS(0.8941)PPAPVMHS(0.2127)PS(0.8932)R;
GPPSPPAPVMHSPSR	GPPS[79.9663]PPAPVMHS[79.9663]PSR	R	K	221	235	15	2	12S(79.9663),4S(79.9663)	sp|Q13573|SNW1_HUMAN	Q13573	SNW1_HUMAN	SNW1	SNW domain-containing protein 1			5	1.86834e+06	MS/MS	STY:79.9663@GPPS(0.8676)PPAPVMHS(0.8663)PS(0.2661)R;
GPQPPTVSPIR	GPQPPT[79.9663]VSPIR	K	S	779	789	11	2	6T(79.9663)	sp|P46087|NOP2_HUMAN	P46087	NOP2_HUMAN	NOP2	28S rRNA (cytosine(4447)-C(5))-methyltransferase			4	2.36101e+06	MS/MS	STY:79.9663@GPQPPT(0.9255)VS(0.0745)PIR;
GPSPAPASSPK	GPSPAPAS[79.9663]SPK	R	R	717	727	11	2	8S(79.9663)	sp|Q9H7N4|SFR19_HUMAN	Q9H7N4	SFR19_HUMAN	SCAF1	Splicing factor, arginine/serine-rich 19			1	341004	MS/MS	STY:79.9663@GPS(0.0219)PAPAS(0.4890)S(0.4890)PK;
GPSSVEDIK	GPSS[79.9663]VEDIK	K	A	240	248	9	2	4S(79.9663)	sp|P06748|NPM_HUMAN	P06748	NPM_HUMAN	NPM1	Nucleophosmin			1	596133	MS/MS	STY:79.9663@GPS(0.0641)S(0.9359)VEDIK;
GPSLDIDTPDVNIEGPEGK	GPS[79.9663]LDIDTPDVNIEGPEGK	K	L	4423	4441	19	2	3S(79.9663)	sp|Q09666|AHNK_HUMAN	Q09666	AHNK_HUMAN	AHNAK	Neuroblast differentiation-associated protein AHNAK			1	826997	MS/MS	STY:79.9663@GPS(0.5117)LDIDT(0.4883)PDVNIEGPEGK;
GPSPSSPTPPAAAAPAEQAPR	GPS[79.9663]PS[79.9663]SPTPPAAAAPAEQAPR	R	A	103	123	21	3	3S(79.9663),5S(79.9663)	sp|Q86VQ1|GLCI1_HUMAN	Q86VQ1	GLCI1_HUMAN	GLCCI1	Glucocorticoid-induced transcript 1 protein			2	314165	MS/MS	STY:79.9663@GPS(0.5000)PS(0.5000)S(0.5000)PT(0.5000)PPAAAAPAEQAPR;
GPSPTPEDVSMK	GPS[79.9663]PTPEDVSMK	K	E	90	101	12	2	3S(79.9663)	sp|O95067|CCNB2_HUMAN	O95067	CCNB2_HUMAN	CCNB2	G2/mitotic-specific cyclin-B2			1	679673	MS/MS	STY:79.9663@GPS(0.9398)PT(0.0308)PEDVS(0.0294)MK;
GPSSVEDIK	GPS[79.9663]SVEDIK	K	A	240	248	9	2	3S(79.9663)	sp|P06748|NPM_HUMAN	P06748	NPM_HUMAN	NPM1	Nucleophosmin			1	596133	MS/MS	STY:79.9663@GPS(0.6752)S(0.3248)VEDIK;
GPSWDPFR	GPS[79.9663]WDPFR	R	D	13	20	8	2	3S(79.9663)	sp|P04792|HSPB1_HUMAN	P04792	HSPB1_HUMAN	HSPB1	Heat shock protein beta-1			4	917953	MS/MS	STY:79.9663@GPS(1.0000)WDPFR;
GPVGTVSEAQLAR	GPVGT[79.9663]VSEAQLAR	K	R	168	180	13	2	5T(79.9663)	sp|Q9NZM1|MYOF_HUMAN	Q9NZM1	MYOF_HUMAN	MYOF	Myoferlin			2	716836	MS/MS	STY:79.9663@GPVGT(0.5000)VS(0.5000)EAQLAR;
GPVSGTEPEPVYSMEAADYR	GPVSGTEPEPVYSMEAADY[79.9663]R	R	E	435	454	20	2	19Y(79.9663)	sp|Q14247|SRC8_HUMAN	Q14247	SRC8_HUMAN	CTTN	Src substrate cortactin			1	504669	MS/MS	STY:79.9663@GPVS(0.1763)GT(0.2244)EPEPVY(0.1841)S(0.1841)MEAADY(0.2311)R;
GQTPLTEGSEDLDGHSDPEESFAR	GQTPLT[79.9663]EGSEDLDGHS[79.9663]DPEESFAR	R	D	305	328	24	3	16S(79.9663),6T(79.9663)	sp|Q86VR2|RETR3_HUMAN	Q86VR2	RETR3_HUMAN	RETREG3	Reticulophagy regulator 3			1	0	MS/MS	STY:79.9663@GQT(0.0647)PLT(0.6008)EGS(0.6008)EDLDGHS(0.6737)DPEES(0.0602)FAR;
GQTPLTEGSEDLDGHSDPEESFAR	GQT[79.9663]PLTEGSEDLDGHSDPEESFAR	R	D	305	328	24	3	3T(79.9663)	sp|Q86VR2|RETR3_HUMAN	Q86VR2	RETR3_HUMAN	RETREG3	Reticulophagy regulator 3			1	205549	MS/MS	STY:79.9663@GQT(0.2000)PLT(0.2000)EGS(0.2000)EDLDGHS(0.2000)DPEES(0.2000)FAR;
GQTPLTEGSEDLDGHSDPEESFAR	GQT[79.9663]PLT[79.9663]EGSEDLDGHSDPEESFAR	R	D	305	328	24	3	3T(79.9663),6T(79.9663)	sp|Q86VR2|RETR3_HUMAN	Q86VR2	RETR3_HUMAN	RETREG3	Reticulophagy regulator 3			1	423872	MS/MS	STY:79.9663@GQT(0.4000)PLT(0.4000)EGS(0.4000)EDLDGHS(0.4000)DPEES(0.4000)FAR;
GRLDSSEMDHSENEDYTMSSPLPGK	GRLDSSEMDHS[79.9663]ENEDY[79.9663]TMSSPLPGK	K	K	1172	1196	25	3	11S(79.9663),16Y(79.9663)	sp|Q9NTI5|PDS5B_HUMAN	Q9NTI5	PDS5B_HUMAN	PDS5B	Sister chromatid cohesion protein PDS5 homolog B			1	0	MS/MS	STY:79.9663@GRLDS(0.0300)S(0.0300)EMDHS(0.7076)ENEDY(0.5926)T(0.5926)MS(0.0260)S(0.0212)PLPGK;
GRLDSSEMDHSENEDYTMSSPLPGK	GRLDS[79.9663]SEMDHSENEDYT[79.9663]MSSPLPGK	K	K	1172	1196	25	3	17T(79.9663),5S(79.9663)	sp|Q9NTI5|PDS5B_HUMAN	Q9NTI5	PDS5B_HUMAN	PDS5B	Sister chromatid cohesion protein PDS5 homolog B			1	1.30595e+06	MS/MS	STY:79.9663@GRLDS(0.3408)S(0.3408)EMDHS(0.3408)ENEDY(0.3408)T(0.3998)MS(0.1185)S(0.1185)PLPGK;
GRLDSSEMDHSENEDYTMSSPLPGK	GRLDS[79.9663]SEMDHSENEDY[79.9663]TMSSPLPGK	K	K	1172	1196	25	3	16Y(79.9663),5S(79.9663)	sp|Q9NTI5|PDS5B_HUMAN	Q9NTI5	PDS5B_HUMAN	PDS5B	Sister chromatid cohesion protein PDS5 homolog B			1	1.30595e+06	MS/MS	STY:79.9663@GRLDS(0.5907)S(0.5907)EMDHS(0.0555)ENEDY(0.7073)T(0.0186)MS(0.0186)S(0.0186)PLPGK;
GRLDSSEMDHSENEDYTMSSPLPGK	GRLDS[79.9663]S[79.9663]EMDHSENEDYTMSSPLPGK	K	K	1172	1196	25	3	5S(79.9663),6S(79.9663)	sp|Q9NTI5|PDS5B_HUMAN	Q9NTI5	PDS5B_HUMAN	PDS5B	Sister chromatid cohesion protein PDS5 homolog B			1	1.30595e+06	MS/MS	STY:79.9663@GRLDS(0.6241)S(0.6241)EMDHS(0.6241)ENEDY(0.0319)T(0.0319)MS(0.0319)S(0.0319)PLPGK;
GRLSPVPVPR	GRLS[79.9663]PVPVPR	R	A	132	141	10	2	4S(79.9663)	sp|Q9UKM9|RALY_HUMAN	Q9UKM9	RALY_HUMAN	RALY	RNA-binding protein Raly			9	1.62002e+06	MS/MS	STY:79.9663@GRLS(1.0000)PVPVPR;
GSAPHSESDLPEQEEEILGSDDDEQEDPNDYCK	GSAPHSESDLPEQEEEILGS[79.9663]DDDEQEDPNDYC[57.0215]K	R	G	32	64	33	3	20S(79.9663),32C(57.0215)	sp|Q96SB4|SRPK1_HUMAN	Q96SB4	SRPK1_HUMAN	SRPK1	SRSF protein kinase 1			2	2.39865e+06	MS/MS	STY:79.9663@GS(0.0242)APHS(0.0245)ES(0.0140)DLPEQEEEILGS(0.9216)DDDEQEDPNDY(0.0158)CK;
GSEDSPPK	GSEDS[79.9663]PPK	K	H	438	445	8	2	5S(79.9663)	sp|P48651|PTSS1_HUMAN	P48651	PTSS1_HUMAN	PTDSS1	Phosphatidylserine synthase 1			1	733195	MS/MS	STY:79.9663@GS(0.0655)EDS(0.9345)PPK;
GSFSDTGLGDGK	GSFS[79.9663]DTGLGDGK	K	M	376	387	12	2	4S(79.9663)	sp|Q9Y2W1|TR150_HUMAN	Q9Y2W1	TR150_HUMAN	THRAP3	Thyroid hormone receptor-associated protein 3			2	3.59943e+06	MS/MS	STY:79.9663@GS(0.0305)FS(0.9388)DT(0.0308)GLGDGK;
GSGTASDDEFENLR	GSGT[79.9663]ASDDEFENLR	R	I	1902	1915	14	2	4T(79.9663)	sp|Q7Z6Z7|HUWE1_HUMAN	Q7Z6Z7	HUWE1_HUMAN	HUWE1	E3 ubiquitin-protein ligase HUWE1			2	6.05556e+06	MS/MS	STY:79.9663@GS(0.0289)GT(0.9394)AS(0.0317)DDEFENLR;
GSNYHLSDNDASDVE	GSNYHLSDNDAS[79.9663]DVE	K	-	634	648	15	2	12S(79.9663)	sp|Q96QE2|MYCT_HUMAN	Q96QE2	MYCT_HUMAN	SLC2A13	Proton myo-inositol cotransporter			1	1.96944e+06	MS/MS	STY:79.9663@GS(0.0203)NY(0.0203)HLS(0.0215)DNDAS(0.9378)DVE;
GSPDGSLQTGKPSAPK	GSPDGS[79.9663]LQTGKPSAPK	R	K	480	495	16	2	6S(79.9663)	sp|Q8IZL8|PELP1_HUMAN	Q8IZL8	PELP1_HUMAN	PELP1	Proline-, glutamic acid- and leucine-rich protein 1			1	965189	MS/MS	STY:79.9663@GS(0.0318)PDGS(0.9162)LQT(0.0260)GKPS(0.0260)APK;
GSSEQAESDNMDVPPEDDSK	GSSEQAESDNMDVPPEDDS[79.9663]K	K	E	55	74	20	2	19S(79.9663)	sp|Q12906|ILF3_HUMAN	Q12906	ILF3_HUMAN	ILF3	Interleukin enhancer-binding factor 3			1	1068519	MS/MS	STY:79.9663@GS(0.0856)S(0.0856)EQAES(0.0856)DNMDVPPEDDS(0.7433)K;
GSSEQAESDNMDVPPEDDSK	GSSEQAES[79.9663]DNMDVPPEDDSK	K	E	55	74	20	2	8S(79.9663)	sp|Q12906|ILF3_HUMAN	Q12906	ILF3_HUMAN	ILF3	Interleukin enhancer-binding factor 3			2	1.1551e+06	MS/MS	STY:79.9663@GS(0.0917)S(0.0917)EQAES(0.4083)DNMDVPPEDDS(0.4083)K;
GSTAENAEYLR	GSTAENAEY[79.9663]LR	K	V	1189	1199	11	2	9Y(79.9663)	sp|P00533|EGFR_HUMAN	P00533	EGFR_HUMAN	EGFR	Epidermal growth factor receptor			1	331463	MS/MS	STY:79.9663@GS(0.0465)T(0.0465)AENAEY(0.9071)LR;
GSVPLSSSPPATHFPDETEITNPVPK	GSVPLSSSPPATHFPDETEIT[79.9663]NPVPK	K	K	1386	1411	26	3	21T(79.9663)	sp|P11388|TOP2A_HUMAN	P11388	TOP2A_HUMAN	TOP2A	DNA topoisomerase 2-alpha			1	1.9373044E7	MS/MS	STY:79.9663@GS(0.1253)VPLS(0.1253)S(0.1766)S(0.1766)PPAT(0.1464)HFPDET(0.0225)EIT(0.2272)NPVPK;
GSVPLSSSPPATHFPDETEITNPVPK	GSVPLSSSPPAT[79.9663]HFPDETEITNPVPK	K	K	1386	1411	26	3	12T(79.9663)	sp|P11388|TOP2A_HUMAN	P11388	TOP2A_HUMAN	TOP2A	DNA topoisomerase 2-alpha			3	2.0970546E7	MS/MS	STY:79.9663@GS(0.0106)VPLS(0.0106)S(0.0106)S(0.0148)PPAT(0.5446)HFPDET(0.2044)EIT(0.2044)NPVPK;
GSVPLSSSPPATHFPDETEITNPVPK	GSVPLSSS[79.9663]PPATHFPDETEITNPVPK	K	K	1386	1411	26	3	8S(79.9663)	sp|P11388|TOP2A_HUMAN	P11388	TOP2A_HUMAN	TOP2A	DNA topoisomerase 2-alpha			2	1.9373044E7	MS/MS	STY:79.9663@GS(0.0087)VPLS(0.0095)S(0.0095)S(0.8770)PPAT(0.0217)HFPDET(0.0356)EIT(0.0380)NPVPK;
GSVPLSSSPPATHFPDETEITNPVPK	GSVPLS[79.9663]SSPPATHFPDETEITNPVPK	K	K	1386	1411	26	3	6S(79.9663)	sp|P11388|TOP2A_HUMAN	P11388	TOP2A_HUMAN	TOP2A	DNA topoisomerase 2-alpha			4	1.9373044E7	MS/MS	STY:79.9663@GS(0.0233)VPLS(0.7798)S(0.0085)S(0.0085)PPAT(0.0091)HFPDET(0.0117)EIT(0.1591)NPVPK;
GSAPHSESDLPEQEEEILGSDDDEQEDPNDYCK	GS[79.9663]APHSESDLPEQEEEILGSDDDEQEDPNDYC[57.0215]K	R	G	32	64	33	3	2S(79.9663),32C(57.0215)	sp|Q96SB4|SRPK1_HUMAN	Q96SB4	SRPK1_HUMAN	SRPK1	SRSF protein kinase 1			1	2.39865e+06	MS/MS	STY:79.9663@GS(0.2483)APHS(0.2483)ES(0.2483)DLPEQEEEILGS(0.2483)DDDEQEDPNDY(0.0069)CK;
GSDSDSEGDNPEK	GS[79.9663]DSDSEGDNPEK	K	K	94	106	13	2	2S(79.9663)	sp|Q9UN37|VPS4A_HUMAN	Q9UN37	VPS4A_HUMAN	VPS4A	Vacuolar protein sorting-associated protein 4A			1	129167	MS/MS	STY:79.9663@GS(0.3333)DS(0.3333)DS(0.3333)EGDNPEK;
GSEDSPPK	GS[79.9663]EDSPPK	K	H	438	445	8	2	2S(79.9663)	sp|P48651|PTSS1_HUMAN	P48651	PTSS1_HUMAN	PTDSS1	Phosphatidylserine synthase 1			4	756970	MS/MS	STY:79.9663@GS(0.9370)EDS(0.0630)PPK;
GSEGYLAATYPTVGQTSPR	GS[79.9663]EGYLAATYPTVGQTSPR	K	A	2499	2517	19	2	2S(79.9663)	sp|P21359|NF1_HUMAN	P21359	NF1_HUMAN	NF1	Neurofibromin			1	0	MS/MS	STY:79.9663@GS(0.4388)EGY(0.4388)LAAT(0.0112)Y(0.0112)PT(0.0112)VGQT(0.0444)S(0.0444)PR;
GSETPGATPGSK	GS[79.9663]ETPGATPGSK	K	I	241	252	12	2	2S(79.9663)	sp|O75533|SF3B1_HUMAN	O75533	SF3B1_HUMAN	SF3B1	Splicing factor 3B subunit 1			1	191743	MS/MS	STY:79.9663@GS(0.2500)ET(0.2500)PGAT(0.2500)PGS(0.2500)K;
GSFSDTGLGDGK	GS[79.9663]FSDTGLGDGK	K	M	376	387	12	2	2S(79.9663)	sp|Q9Y2W1|TR150_HUMAN	Q9Y2W1	TR150_HUMAN	THRAP3	Thyroid hormone receptor-associated protein 3			3	3.59943e+06	MS/MS	STY:79.9663@GS(0.9175)FS(0.0412)DT(0.0412)GLGDGK;
GSGTASDDEFENLR	GS[79.9663]GTASDDEFENLR	R	I	1902	1915	14	2	2S(79.9663)	sp|Q7Z6Z7|HUWE1_HUMAN	Q7Z6Z7	HUWE1_HUMAN	HUWE1	E3 ubiquitin-protein ligase HUWE1			5	6924004	MS/MS	STY:79.9663@GS(0.8754)GT(0.0623)AS(0.0623)DDEFENLR;
GSNYHLSDNDASDVE	GS[79.9663]NYHLSDNDASDVE	K	-	634	648	15	2	2S(79.9663)	sp|Q96QE2|MYCT_HUMAN	Q96QE2	MYCT_HUMAN	SLC2A13	Proton myo-inositol cotransporter			1	1.96944e+06	MS/MS	STY:79.9663@GS(0.3288)NY(0.3288)HLS(0.3288)DNDAS(0.0135)DVE;
GSPDGSLQTGKPSAPK	GS[79.9663]PDGSLQTGKPSAPK	R	K	480	495	16	2	2S(79.9663)	sp|Q8IZL8|PELP1_HUMAN	Q8IZL8	PELP1_HUMAN	PELP1	Proline-, glutamic acid- and leucine-rich protein 1			2	965189	MS/MS	STY:79.9663@GS(0.4859)PDGS(0.4859)LQT(0.0141)GKPS(0.0141)APK;
GSPNTASAEATLPR	GS[79.9663]PNTASAEATLPR	R	W	741	754	14	2	2S(79.9663)	sp|Q6PJG6|BRAT1_HUMAN	Q6PJG6	BRAT1_HUMAN	BRAT1	Integrator complex assembly factor BRAT1			1	0	MS/MS	STY:79.9663@GS(0.8908)PNT(0.0220)AS(0.0436)AEAT(0.0436)LPR;
GSSEQAESDNMDVPPEDDSK	GS[79.9663]SEQAESDNMDVPPEDDSK	K	E	55	74	20	2,3	2S(79.9663)	sp|Q12906|ILF3_HUMAN	Q12906	ILF3_HUMAN	ILF3	Interleukin enhancer-binding factor 3			10	1.52451e+06	MS/MS	STY:79.9663@GS(0.4342)S(0.4342)EQAES(0.0273)DNMDVPPEDDS(0.1044)K;
GSSLSGTDDGAQEVVK	GS[79.9663]SLSGTDDGAQEVVK	R	D	275	290	16	2	2S(79.9663)	sp|Q9Y6D5|BIG2_HUMAN	Q9Y6D5	BIG2_HUMAN	ARFGEF2	Brefeldin A-inhibited guanine nucleotide-exchange protein 2			2	1.60206e+06	MS/MS	STY:79.9663@GS(0.2500)S(0.2500)LS(0.2500)GT(0.2500)DDGAQEVVK;
GSSPGIQDTLEAEDGAFETDEAPEDR	GS[79.9663]SPGIQDTLEAEDGAFETDEAPEDR	K	I	239	264	26	3	2S(79.9663)	sp|Q9UNX4|WDR3_HUMAN	Q9UNX4	WDR3_HUMAN	WDR3	WD repeat-containing protein 3			1	2.38587e+06	MS/MS	STY:79.9663@GS(0.4796)S(0.4796)PGIQDT(0.0208)LEAEDGAFET(0.0200)DEAPEDR;
GSVPLSSSPPATHFPDETEITNPVPK	GS[79.9663]VPLSSSPPATHFPDETEITNPVPK	K	K	1386	1411	26	3	2S(79.9663)	sp|P11388|TOP2A_HUMAN	P11388	TOP2A_HUMAN	TOP2A	DNA topoisomerase 2-alpha			2	2.0059202E7	MS/MS	STY:79.9663@GS(0.7980)VPLS(0.0296)S(0.0296)S(0.0296)PPAT(0.0487)HFPDET(0.0322)EIT(0.0322)NPVPK;
GSYGSDAEEEEYR	GS[79.9663]YGSDAEEEEYR	R	Q	1155	1167	13	2	2S(79.9663)	sp|Q9UDY2|ZO2_HUMAN	Q9UDY2	ZO2_HUMAN	TJP2	Tight junction protein 2			1	817055	MS/MS	STY:79.9663@GS(0.3098)Y(0.3098)GS(0.3098)DAEEEEY(0.0707)R;
GTDTQTPAVLSPSK	GTDTQTPAVLS[79.9663]PSK	K	T	722	735	14	2	11S(79.9663)	sp|P46087|NOP2_HUMAN	P46087	NOP2_HUMAN	NOP2	28S rRNA (cytosine(4447)-C(5))-methyltransferase			5	6.00031e+06	MS/MS	STY:79.9663@GT(0.0114)DT(0.0114)QT(0.0114)PAVLS(0.4829)PS(0.4829)K;
GTDTQTPAVLSPSK	GTDTQT[79.9663]PAVLSPSK	K	T	722	735	14	2	6T(79.9663)	sp|P46087|NOP2_HUMAN	P46087	NOP2_HUMAN	NOP2	28S rRNA (cytosine(4447)-C(5))-methyltransferase			1	5.23464e+06	MS/MS	STY:79.9663@GT(0.0069)DT(0.0069)QT(0.3288)PAVLS(0.3288)PS(0.3288)K;
GTENGVNGTLTSNVADSPR	GTENGVNGT[79.9663]LTSNVADSPR	K	N	349	367	19	2	9T(79.9663)	sp|Q15629|TRAM1_HUMAN	Q15629	TRAM1_HUMAN	TRAM1	Translocating chain-associated membrane protein 1			1	0	MS/MS	STY:79.9663@GT(0.0103)ENGVNGT(0.3221)LT(0.3221)S(0.3221)NVADS(0.0232)PR;
GTEPSPGGTPQPSRPVSPAGPPEGVPEEAQPPR	GTEPSPGGT[79.9663]PQPSRPVS[79.9663]PAGPPEGVPEEAQPPR	K	L	110	142	33	3	17S(79.9663),9T(79.9663)	sp|Q8WUZ0|BCL7C_HUMAN	Q8WUZ0	BCL7C_HUMAN	BCL7C	B-cell CLL/lymphoma 7 protein family member C			1	1.71622e+06	MS/MS	STY:79.9663@GT(0.2193)EPS(0.2193)PGGT(0.7340)PQPS(0.0875)RPVS(0.7399)PAGPPEGVPEEAQPPR;
GTGQSDDSDIWDDTALIK	GTGQSDDS[79.9663]DIWDDTALIK	R	A	24	41	18	2	8S(79.9663)	sp|Q16637|SMN_HUMAN	Q16637	SMN_HUMAN	SMN1	Survival motor neuron protein			1	0	MS/MS	STY:79.9663@GT(0.0206)GQS(0.0245)DDS(0.9309)DIWDDT(0.0240)ALIK;
GTLDEEDEEADSDTDDIDHR	GTLDEEDEEADSDT[79.9663]DDIDHR	R	V	327	346	20	3	14T(79.9663)	sp|Q9HCN4|GPN1_HUMAN	Q9HCN4	GPN1_HUMAN	GPN1	GPN-loop GTPase 1			1	958508	MS/MS	STY:79.9663@GT(0.1115)LDEEDEEADS(0.1139)DT(0.7746)DDIDHR;
GTLDEEDEEADSDTDDIDHR	GTLDEEDEEADS[79.9663]DTDDIDHR	R	V	327	346	20	2,3	12S(79.9663)	sp|Q9HCN4|GPN1_HUMAN	Q9HCN4	GPN1_HUMAN	GPN1	GPN-loop GTPase 1			14	5107095	MS/MS	STY:79.9663@GT(0.0313)LDEEDEEADS(0.9318)DT(0.0369)DDIDHR;
GTPSQSPVVGR	GTPSQS[79.9663]PVVGR	K	S	176	186	11	2	6S(79.9663)	sp|P52594|AGFG1_HUMAN	P52594	AGFG1_HUMAN	AGFG1	Arf-GAP domain and FG repeat-containing protein 1			1	2.58358e+06	MS/MS	STY:79.9663@GT(0.0329)PS(0.0329)QS(0.9343)PVVGR;
GTSPRPPEGGLGYSQLGDDDLK	GTSPRPPEGGLGY[79.9663]SQLGDDDLK	R	E	750	771	22	3	13Y(79.9663)	sp|P21127|CD11B_HUMAN	P21127	CD11B_HUMAN	CDK11B	Cyclin-dependent kinase 11B	CDK11A	sp|Q9UQ88|CD11A_HUMAN	1	869265	MS/MS	STY:79.9663@GT(0.0937)S(0.0147)PRPPEGGLGY(0.4458)S(0.4458)QLGDDDLK;
GTDTQTPAVLSPSK	GT[79.9663]DTQTPAVLSPSK	K	T	722	735	14	2	2T(79.9663)	sp|P46087|NOP2_HUMAN	P46087	NOP2_HUMAN	NOP2	28S rRNA (cytosine(4447)-C(5))-methyltransferase			1	5.23464e+06	MS/MS	STY:79.9663@GT(0.2000)DT(0.2000)QT(0.2000)PAVLS(0.2000)PS(0.2000)K;
GTEASSGTEAATGLEGEEK	GT[79.9663]EASSGTEAATGLEGEEK	K	D	594	612	19	2	2T(79.9663)	sp|Q8IY81|SPB1_HUMAN	Q8IY81	SPB1_HUMAN	FTSJ3	pre-rRNA 2'-O-ribose RNA methyltransferase FTSJ3			1	839703	MS/MS	STY:79.9663@GT(0.2000)EAS(0.2000)S(0.2000)GT(0.2000)EAAT(0.2000)GLEGEEK;
GTENGVNGTLTSNVADSPR	GT[79.9663]ENGVNGTLTSNVADSPR	K	N	349	367	19	2	2T(79.9663)	sp|Q15629|TRAM1_HUMAN	Q15629	TRAM1_HUMAN	TRAM1	Translocating chain-associated membrane protein 1			1	0	MS/MS	STY:79.9663@GT(0.7585)ENGVNGT(0.0604)LT(0.0604)S(0.0604)NVADS(0.0604)PR;
GTEPSPGGTPQPSRPVSPAGPPEGVPEEAQPPR	GT[79.9663]EPSPGGTPQPS[79.9663]RPVSPAGPPEGVPEEAQPPR	K	L	110	142	33	3	13S(79.9663),2T(79.9663)	sp|Q8WUZ0|BCL7C_HUMAN	Q8WUZ0	BCL7C_HUMAN	BCL7C	B-cell CLL/lymphoma 7 protein family member C			1	1.37607e+06	MS/MS	STY:79.9663@GT(0.5628)EPS(0.5628)PGGT(0.0840)PQPS(0.6259)RPVS(0.1645)PAGPPEGVPEEAQPPR;
GTEPSPGGTPQPSRPVSPAGPPEGVPEEAQPPR	GT[79.9663]EPSPGGT[79.9663]PQPSRPVSPAGPPEGVPEEAQPPR	K	L	110	142	33	3,4	2T(79.9663),9T(79.9663)	sp|Q8WUZ0|BCL7C_HUMAN	Q8WUZ0	BCL7C_HUMAN	BCL7C	B-cell CLL/lymphoma 7 protein family member C			2	2632970	MS/MS	STY:79.9663@GT(0.5853)EPS(0.5853)PGGT(0.6547)PQPS(0.0874)RPVS(0.0874)PAGPPEGVPEEAQPPR;
GTEPSPGGTPQPSRPVSPAGPPEGVPEEAQPPR	GT[79.9663]EPS[79.9663]PGGTPQPSRPVSPAGPPEGVPEEAQPPR	K	L	110	142	33	3	2T(79.9663),5S(79.9663)	sp|Q8WUZ0|BCL7C_HUMAN	Q8WUZ0	BCL7C_HUMAN	BCL7C	B-cell CLL/lymphoma 7 protein family member C			1	1.71622e+06	MS/MS	STY:79.9663@GT(0.4000)EPS(0.4000)PGGT(0.4000)PQPS(0.4000)RPVS(0.4000)PAGPPEGVPEEAQPPR;
GTLDEEDEEADSDTDDIDHR	GT[79.9663]LDEEDEEADSDTDDIDHR	R	V	327	346	20	2,3	2T(79.9663)	sp|Q9HCN4|GPN1_HUMAN	Q9HCN4	GPN1_HUMAN	GPN1	GPN-loop GTPase 1			7	4.18467e+06	MS/MS	STY:79.9663@GT(0.7519)LDEEDEEADS(0.1815)DT(0.0666)DDIDHR;
GTPSQSPVVGR	GT[79.9663]PSQSPVVGR	K	S	176	186	11	2	2T(79.9663)	sp|P52594|AGFG1_HUMAN	P52594	AGFG1_HUMAN	AGFG1	Arf-GAP domain and FG repeat-containing protein 1			2	2.58358e+06	MS/MS	STY:79.9663@GT(0.3333)PS(0.3333)QS(0.3333)PVVGR;
GTSDSSSGNVSEGESPPDSQEDSFQGR	GT[79.9663]SDSSSGNVSEGESPPDSQEDSFQGR	K	Q	317	343	27	3	2T(79.9663)	sp|Q8WUB8|PHF10_HUMAN	Q8WUB8	PHF10_HUMAN	PHF10	PHD finger protein 10			3	1.29052e+06	MS/MS	STY:79.9663@GT(0.1422)S(0.1422)DS(0.1422)S(0.1422)S(0.1422)GNVS(0.1422)EGES(0.1422)PPDS(0.0026)QEDS(0.0023)FQGR;
GTSPRPPEGGLGYSQLGDDDLK	GT[79.9663]SPRPPEGGLGYSQLGDDDLK	R	E	750	771	22	3	2T(79.9663)	sp|P21127|CD11B_HUMAN	P21127	CD11B_HUMAN	CDK11B	Cyclin-dependent kinase 11B	CDK11A	sp|Q9UQ88|CD11A_HUMAN	9	1.33705e+06	MS/MS	STY:79.9663@GT(0.4871)S(0.4871)PRPPEGGLGY(0.0133)S(0.0125)QLGDDDLK;
GTYVPSSPTR	GT[79.9663]YVPSSPTR	K	L	407	416	10	2	2T(79.9663)	sp|Q9Y4P8|WIPI2_HUMAN	Q9Y4P8	WIPI2_HUMAN	WIPI2	WD repeat domain phosphoinositide-interacting protein 2			2	1.13168e+06	MS/MS	STY:79.9663@GT(0.4844)Y(0.4844)VPS(0.0101)S(0.0101)PT(0.0108)R;
GVAPADSPEAPR	GVAPADS[79.9663]PEAPR	R	R	731	742	12	2	7S(79.9663)	sp|Q9P2G1|AKIB1_HUMAN	Q9P2G1	AKIB1_HUMAN	ANKIB1	Ankyrin repeat and IBR domain-containing protein 1			1	0	MS/MS	STY:79.9663@GVAPADS(1.0000)PEAPR;
GVEPSPSPIK	GVEPS[79.9663]PSPIK	K	P	241	250	10	2	5S(79.9663)	sp|Q92890|UFD1_HUMAN	Q92890	UFD1_HUMAN	UFD1	Ubiquitin recognition factor in ER-associated degradation protein 1			1	557871	MS/MS	STY:79.9663@GVEPS(0.5000)PS(0.5000)PIK;
GVPAGNSDTEGGQPGR	GVPAGNSDT[79.9663]EGGQPGR	K	K	832	847	16	2	9T(79.9663)	sp|Q9UKV3|ACINU_HUMAN	Q9UKV3	ACINU_HUMAN	ACIN1	Apoptotic chromatin condensation inducer in the nucleus			1	373391	MS/MS	STY:79.9663@GVPAGNS(0.2312)DT(0.7688)EGGQPGR;
GVSMPNMLEPK	GVS[79.9663]MPNMLEPK	R	I	704	714	11	2	3S(79.9663)	sp|O14639|ABLM1_HUMAN	O14639	ABLM1_HUMAN	ABLIM1	Actin-binding LIM protein 1			1	388645	MS/MS	STY:79.9663@GVS(1.0000)MPNMLEPK;
GWSQEGPVK	GWS[79.9663]QEGPVK	R	S	219	227	9	2	3S(79.9663)	sp|Q9C0C2|TB182_HUMAN	Q9C0C2	TB182_HUMAN	TNKS1BP1	182 kDa tankyrase-1-binding protein			1	245079	MS/MS	STY:79.9663@GWS(1.0000)QEGPVK;
GYYSPYSVSGSGSTAGSR	GYYSPYS[79.9663]VSGSGSTAGSR	K	T	4610	4627	18	2	7S(79.9663)	sp|Q15149|PLEC_HUMAN	Q15149	PLEC_HUMAN	PLEC	Plectin			1	734110	MS/MS	STY:79.9663@GY(0.0079)Y(0.0079)S(0.0101)PY(0.0101)S(0.8989)VS(0.0069)GS(0.0153)GS(0.0153)T(0.0153)AGS(0.0121)R;
HAPSPEPAVQGTGVAGVPEESGDAAAIPAK	HAPSPEPAVQGTGVAGVPEES[79.9663]GDAAAIPAK	R	K	20	49	30	3	21S(79.9663)	sp|P13051|UNG_HUMAN	P13051	UNG_HUMAN	UNG	Uracil-DNA glycosylase			1	2610550	MS/MS	STY:79.9663@HAPS(0.3271)PEPAVQGT(0.1664)GVAGVPEES(0.5066)GDAAAIPAK;
HAPSPEPAVQGTGVAGVPEESGDAAAIPAK	HAPSPEPAVQGT[79.9663]GVAGVPEESGDAAAIPAK	R	K	20	49	30	3	12T(79.9663)	sp|P13051|UNG_HUMAN	P13051	UNG_HUMAN	UNG	Uracil-DNA glycosylase			1	2610550	MS/MS	STY:79.9663@HAPS(0.0267)PEPAVQGT(0.7651)GVAGVPEES(0.2082)GDAAAIPAK;
HAPSPEPAVQGTGVAGVPEESGDAAAIPAK	HAPS[79.9663]PEPAVQGTGVAGVPEESGDAAAIPAK	R	K	20	49	30	3	4S(79.9663)	sp|P13051|UNG_HUMAN	P13051	UNG_HUMAN	UNG	Uracil-DNA glycosylase			3	2610550	MS/MS	STY:79.9663@HAPS(0.9363)PEPAVQGT(0.0307)GVAGVPEES(0.0330)GDAAAIPAK;
HASTSSPADK	HAS[79.9663]TSSPADK	R	A	1758	1767	10	2	3S(79.9663)	sp|Q5T4S7|UBR4_HUMAN	Q5T4S7	UBR4_HUMAN	UBR4	E3 ubiquitin-protein ligase UBR4			3	273862	MS/MS	STY:79.9663@HAS(0.3209)T(0.3209)S(0.3209)S(0.0373)PADK;
HDSIPAADTFEDLSDVEGGGSEPTQR	HDSIPAADTFEDLSDVEGGGS[79.9663]EPTQR	K	D	226	251	26	3	21S(79.9663)	sp|O95671|ASML_HUMAN	O95671	ASML_HUMAN	ASMTL	Probable bifunctional dTTP/UTP pyrophosphatase/methyltransferase protein			1	1.02694e+06	MS/MS	STY:79.9663@HDS(0.0745)IPAADT(0.0745)FEDLS(0.0745)DVEGGGS(0.3882)EPT(0.3882)QR;
HDSIPAADTFEDLSDVEGGGSEPTQR	HDS[79.9663]IPAADTFEDLSDVEGGGSEPTQR	K	D	226	251	26	3	3S(79.9663)	sp|O95671|ASML_HUMAN	O95671	ASML_HUMAN	ASMTL	Probable bifunctional dTTP/UTP pyrophosphatase/methyltransferase protein			1	1.02694e+06	MS/MS	STY:79.9663@HDS(0.4832)IPAADT(0.4832)FEDLS(0.0112)DVEGGGS(0.0112)EPT(0.0112)QR;
HDSPEDVK	HDS[79.9663]PEDVK	R	R	479	486	8	2	3S(79.9663)	sp|P31948|STIP1_HUMAN	P31948	STIP1_HUMAN	STIP1	Stress-induced-phosphoprotein 1			5	315347	MS/MS	STY:79.9663@HDS(1.0000)PEDVK;
HEAPSSPISGQPCGDDQNASPSK	HEAPS[79.9663]SPISGQPC[57.0215]GDDQNASPSK	K	L	153	175	23	3	13C(57.0215),5S(79.9663)	sp|O75376|NCOR1_HUMAN	O75376	NCOR1_HUMAN	NCOR1	Nuclear receptor corepressor 1			2	483947	MS/MS	STY:79.9663@HEAPS(0.2000)S(0.2000)PIS(0.2000)GQPCGDDQNAS(0.2000)PS(0.2000)K;
HELSPPQK	HELS[79.9663]PPQK	R	R	71	78	8	2	4S(79.9663)	sp|Q9BXP5|SRRT_HUMAN	Q9BXP5	SRRT_HUMAN	SRRT	Serrate RNA effector molecule homolog			7	1.37751e+06	MS/MS	STY:79.9663@HELS(1.0000)PPQK;
HGGSPQPLATTPLSQEPVNPPSEASPTR	HGGSPQPLATTPLSQEPVNPPSEAS[79.9663]PT[79.9663]R	R	D	374	401	28	3	25S(79.9663),27T(79.9663)	sp|Q9UQ35|SRRM2_HUMAN	Q9UQ35	SRRM2_HUMAN	SRRM2	Serine/arginine repetitive matrix protein 2			1	6.26275e+06	MS/MS	STY:79.9663@HGGS(0.2372)PQPLAT(0.2372)T(0.2372)PLS(0.2372)QEPVNPPS(0.1831)EAS(0.4341)PT(0.4341)R;
HGGSPQPLATTPLSQEPVNPPSEASPTR	HGGSPQPLATTPLSQEPVNPPS[79.9663]EAS[79.9663]PTR	R	D	374	401	28	3	22S(79.9663),25S(79.9663)	sp|Q9UQ35|SRRM2_HUMAN	Q9UQ35	SRRM2_HUMAN	SRRM2	Serine/arginine repetitive matrix protein 2			2	1.5938578E7	MS/MS	STY:79.9663@HGGS(0.2091)PQPLAT(0.0347)T(0.0347)PLS(0.0347)QEPVNPPS(0.5622)EAS(0.5622)PT(0.5622)R;
HGGSPQPLATTPLSQEPVNPPSEASPTR	HGGSPQPLATTPLS[79.9663]QEPVNPPSEASPT[79.9663]R	R	D	374	401	28	3	14S(79.9663),27T(79.9663)	sp|Q9UQ35|SRRM2_HUMAN	Q9UQ35	SRRM2_HUMAN	SRRM2	Serine/arginine repetitive matrix protein 2			1	6.26275e+06	MS/MS	STY:79.9663@HGGS(0.1952)PQPLAT(0.1952)T(0.1952)PLS(0.5930)QEPVNPPS(0.1845)EAS(0.0268)PT(0.6102)R;
HGGSPQPLATTPLSQEPVNPPSEASPTR	HGGS[79.9663]PQPLATTPLSQEPVNPPSEASPT[79.9663]R	R	D	374	401	28	3	27T(79.9663),4S(79.9663)	sp|Q9UQ35|SRRM2_HUMAN	Q9UQ35	SRRM2_HUMAN	SRRM2	Serine/arginine repetitive matrix protein 2			2	6.26275e+06	MS/MS	STY:79.9663@HGGS(0.9006)PQPLAT(0.0332)T(0.0332)PLS(0.0559)QEPVNPPS(0.0316)EAS(0.0474)PT(0.8982)R;
HGGSPQPLATTPLSQEPVNPPSEASPTR	HGGS[79.9663]PQPLATTPLSQEPVNPPSEAS[79.9663]PTR	R	D	374	401	28	3	25S(79.9663),4S(79.9663)	sp|Q9UQ35|SRRM2_HUMAN	Q9UQ35	SRRM2_HUMAN	SRRM2	Serine/arginine repetitive matrix protein 2			1	6.26275e+06	MS/MS	STY:79.9663@HGGS(0.6344)PQPLAT(0.1268)T(0.1268)PLS(0.0888)QEPVNPPS(0.4153)EAS(0.5847)PT(0.0232)R;
HGGSPQPLATTPLSQEPVNPPSEASPTR	HGGS[79.9663]PQPLATTPLSQEPVNPPS[79.9663]EASPTR	R	D	374	401	28	3	22S(79.9663),4S(79.9663)	sp|Q9UQ35|SRRM2_HUMAN	Q9UQ35	SRRM2_HUMAN	SRRM2	Serine/arginine repetitive matrix protein 2			4	1.5938578E7	MS/MS	STY:79.9663@HGGS(0.7211)PQPLAT(0.0198)T(0.0198)PLS(0.0278)QEPVNPPS(0.5970)EAS(0.5970)PT(0.0175)R;
HGGSPQPLATTPLSQEPVNPPSEASPTR	HGGS[79.9663]PQPLATTPLS[79.9663]QEPVNPPSEASPTR	R	D	374	401	28	3	14S(79.9663),4S(79.9663)	sp|Q9UQ35|SRRM2_HUMAN	Q9UQ35	SRRM2_HUMAN	SRRM2	Serine/arginine repetitive matrix protein 2			1	6.26275e+06	MS/MS	STY:79.9663@HGGS(0.9338)PQPLAT(0.0293)T(0.0279)PLS(0.9341)QEPVNPPS(0.0249)EAS(0.0249)PT(0.0249)R;
HGGSPQPLATTPLSQEPVNPPSEASPTR	HGGS[79.9663]PQPLAT[79.9663]TPLSQEPVNPPSEASPTR	R	D	374	401	28	3	10T(79.9663),4S(79.9663)	sp|Q9UQ35|SRRM2_HUMAN	Q9UQ35	SRRM2_HUMAN	SRRM2	Serine/arginine repetitive matrix protein 2			1	9675823	MS/MS	STY:79.9663@HGGS(0.2857)PQPLAT(0.2857)T(0.2857)PLS(0.2857)QEPVNPPS(0.2857)EAS(0.2857)PT(0.2857)R;
HIVSNDSSDSDDESHEPK	HIVSNDSSDSDDES[79.9663]HEPK	K	G	428	445	18	3	14S(79.9663)	sp|P47712|PA24A_HUMAN	P47712	PA24A_HUMAN	PLA2G4A	Cytosolic phospholipase A2			5	1.2428e+06	MS/MS	STY:79.9663@HIVS(0.0300)NDS(0.0275)S(0.0275)DS(0.0275)DDES(0.8876)HEPK;
HIVSNDSSDSDDESHEPK	HIVSNDSSDS[79.9663]DDESHEPK	K	G	428	445	18	3	10S(79.9663)	sp|P47712|PA24A_HUMAN	P47712	PA24A_HUMAN	PLA2G4A	Cytosolic phospholipase A2			5	1069098	MS/MS	STY:79.9663@HIVS(0.0239)NDS(0.0896)S(0.0896)DS(0.7597)DDES(0.0371)HEPK;
HIVSNDSSDSDDESHEPK	HIVSNDSS[79.9663]DSDDESHEPK	K	G	428	445	18	3	8S(79.9663)	sp|P47712|PA24A_HUMAN	P47712	PA24A_HUMAN	PLA2G4A	Cytosolic phospholipase A2			1	1.2428e+06	MS/MS	STY:79.9663@HIVS(0.0206)NDS(0.0206)S(0.4581)DS(0.4581)DDES(0.0425)HEPK;
HIVSNDSSDSDDESHEPK	HIVSNDS[79.9663]SDSDDESHEPK	K	G	428	445	18	3	7S(79.9663)	sp|P47712|PA24A_HUMAN	P47712	PA24A_HUMAN	PLA2G4A	Cytosolic phospholipase A2			10	1395930	MS/MS	STY:79.9663@HIVS(0.0507)NDS(0.8296)S(0.0399)DS(0.0399)DDES(0.0399)HEPK;
HIVSNDSSDSDDESHEPK	HIVS[79.9663]NDSSDSDDESHEPK	K	G	428	445	18	3	4S(79.9663)	sp|P47712|PA24A_HUMAN	P47712	PA24A_HUMAN	PLA2G4A	Cytosolic phospholipase A2			11	1.38699e+06	MS/MS	STY:79.9663@HIVS(0.7929)NDS(0.0518)S(0.0518)DS(0.0518)DDES(0.0518)HEPK;
HSLDSDEEEDDDDGGSSK	HSLDSDEEEDDDDGGSS[79.9663]K	K	Y	45	62	18	2	17S(79.9663)	sp|O95400|CD2B2_HUMAN	O95400	CD2B2_HUMAN	CD2BP2	CD2 antigen cytoplasmic tail-binding protein 2			1	3296149	MS/MS	STY:79.9663@HS(0.1432)LDS(0.1432)DEEEDDDDGGS(0.1432)S(0.5705)K;
HSLDSDEEEDDDDGGSSK	HSLDSDEEEDDDDGGS[79.9663]SK	K	Y	45	62	18	3	16S(79.9663)	sp|O95400|CD2B2_HUMAN	O95400	CD2B2_HUMAN	CD2BP2	CD2 antigen cytoplasmic tail-binding protein 2			2	473248	MS/MS	STY:79.9663@HS(0.0516)LDS(0.0516)DEEEDDDDGGS(0.4484)S(0.4484)K;
HSLDSDEEEDDDDGGSSK	HSLDS[79.9663]DEEEDDDDGGSSK	K	Y	45	62	18	2	5S(79.9663)	sp|O95400|CD2B2_HUMAN	O95400	CD2B2_HUMAN	CD2BP2	CD2 antigen cytoplasmic tail-binding protein 2			3	3296149	MS/MS	STY:79.9663@HS(0.0208)LDS(0.9139)DEEEDDDDGGS(0.0326)S(0.0326)K;
HSLDSDEEEDDDDGGSSK	HS[79.9663]LDSDEEEDDDDGGSSK	K	Y	45	62	18	2,3	2S(79.9663)	sp|O95400|CD2B2_HUMAN	O95400	CD2B2_HUMAN	CD2BP2	CD2 antigen cytoplasmic tail-binding protein 2			11	3.7694e+06	MS/MS	STY:79.9663@HS(0.4865)LDS(0.4865)DEEEDDDDGGS(0.0135)S(0.0135)K;
HTGPNSPDTANDGFVR	HTGPNS[79.9663]PDTANDGFVR	K	L	99	114	16	2	6S(79.9663)	sp|P31943|HNRH1_HUMAN	P31943	HNRH1_HUMAN	HNRNPH1	Heterogeneous nuclear ribonucleoprotein H	HNRNPH2	sp|P55795|HNRH2_HUMAN	4	1.40118e+06	MS/MS	STY:79.9663@HT(0.0628)GPNS(0.9088)PDT(0.0284)ANDGFVR;
HTLGDSDNES	HTLGDSDNES[79.9663]	K	-	174	183	10	2	10S(79.9663)	sp|P02794|FRIH_HUMAN	P02794	FRIH_HUMAN	FTH1	Ferritin heavy chain			4	1.96763e+06	MS/MS	STY:79.9663@HT(0.0381)LGDS(0.0381)DNES(0.9238);
HTLGDSDNES	HTLGDS[79.9663]DNES	K	-	174	183	10	2	6S(79.9663)	sp|P02794|FRIH_HUMAN	P02794	FRIH_HUMAN	FTH1	Ferritin heavy chain			8	4066491	MS/MS	STY:79.9663@HT(0.0296)LGDS(0.9413)DNES(0.0291);
HTGPNSPDTANDGFVR	HT[79.9663]GPNSPDTANDGFVR	K	L	99	114	16	2	2T(79.9663)	sp|P31943|HNRH1_HUMAN	P31943	HNRH1_HUMAN	HNRNPH1	Heterogeneous nuclear ribonucleoprotein H	HNRNPH2	sp|P55795|HNRH2_HUMAN	6	1.40118e+06	MS/MS	STY:79.9663@HT(0.4913)GPNS(0.4913)PDT(0.0174)ANDGFVR;
HTLGDSDNES	HT[79.9663]LGDSDNES	K	-	174	183	10	2	2T(79.9663)	sp|P02794|FRIH_HUMAN	P02794	FRIH_HUMAN	FTH1	Ferritin heavy chain			15	3.87969e+06	MS/MS	STY:79.9663@HT(0.9349)LGDS(0.0347)DNES(0.0304);
IASDEEIQGTK	IASDEEIQGT[79.9663]K	R	D	891	901	11	2	10T(79.9663)	sp|Q8WX93|PALLD_HUMAN	Q8WX93	PALLD_HUMAN	PALLD	Palladin			2	5.24942e+06	MS/MS	STY:79.9663@IAS(0.1311)DEEIQGT(0.8689)K;
IASDEEIQGTK	IAS[79.9663]DEEIQGTK	R	D	891	901	11	2	3S(79.9663)	sp|Q8WX93|PALLD_HUMAN	Q8WX93	PALLD_HUMAN	PALLD	Palladin			3	5.24942e+06	MS/MS	STY:79.9663@IAS(0.9455)DEEIQGT(0.0545)K;
IDEDGENTQIEDTEPMSPVLNSK	IDEDGENTQIEDTEPMS[79.9663]PVLNSK	R	F	536	558	23	3	17S(79.9663)	sp|Q12888|TP53B_HUMAN	Q12888	TP53B_HUMAN	TP53BP1	TP53-binding protein 1			4	6.75707e+06	MS/MS	STY:79.9663@IDEDGENT(0.0246)QIEDT(0.0249)EPMS(0.9317)PVLNS(0.0189)K;
IDEDGENTQIEDTEPMSPVLNSK	IDEDGENTQIEDTEPM[15.9949]S[79.9663]PVLNSK	R	F	536	558	23	3	16M(15.9949),17S(79.9663)	sp|Q12888|TP53B_HUMAN	Q12888	TP53B_HUMAN	TP53BP1	TP53-binding protein 1			2	992351	MS/MS	STY:79.9663@IDEDGENT(0.0256)QIEDT(0.0160)EPMS(0.4792)PVLNS(0.4792)K;M:15.9949@IDEDGENTQIEDTEPM(1.0000)SPVLNSK;
IDEDGENTQIEDTEPMSPVLNSK	IDEDGENTQIEDT[79.9663]EPMSPVLNSK	R	F	536	558	23	3	13T(79.9663)	sp|Q12888|TP53B_HUMAN	Q12888	TP53B_HUMAN	TP53BP1	TP53-binding protein 1			1	439930	MS/MS	STY:79.9663@IDEDGENT(0.1289)QIEDT(0.2904)EPMS(0.2904)PVLNS(0.2904)K;
IDEDGENTQIEDTEPMSPVLNSK	IDEDGENT[79.9663]QIEDTEPMSPVLNSK	R	F	536	558	23	3	8T(79.9663)	sp|Q12888|TP53B_HUMAN	Q12888	TP53B_HUMAN	TP53BP1	TP53-binding protein 1			1	6.75707e+06	MS/MS	STY:79.9663@IDEDGENT(0.3288)QIEDT(0.3288)EPMS(0.3288)PVLNS(0.0135)K;
IDENSDK	IDENS[79.9663]DK	K	E	495	501	7	2	5S(79.9663)	sp|Q8N3X1|FNBP4_HUMAN	Q8N3X1	FNBP4_HUMAN	FNBP4	Formin-binding protein 4			1	314322	MS/MS	STY:79.9663@IDENS(1.0000)DK;
IDEPSTPYHSMMGDDEDACSDTEATEAMAPDILAR	IDEPSTPYHSMMGDDEDAC[57.0215]SDTEAT[79.9663]EAMAPDILAR	K	K	68	102	35	3	19C(57.0215),25T(79.9663)	sp|P41236|IPP2_HUMAN	P41236	IPP2_HUMAN	PPP1R2	Protein phosphatase inhibitor 2			1	8100029	MS/MS	STY:79.9663@IDEPS(0.0202)T(0.0202)PY(0.0202)HS(0.0202)MMGDDEDACS(0.0283)DT(0.0283)EAT(0.8625)EAMAPDILAR;
IDEPSTPYHSMMGDDEDACSDTEATEAMAPDILAR	IDEPSTPYHSMMGDDEDAC[57.0215]S[79.9663]DTEATEAMAPDILAR	K	K	68	102	35	3,4	19C(57.0215),20S(79.9663)	sp|P41236|IPP2_HUMAN	P41236	IPP2_HUMAN	PPP1R2	Protein phosphatase inhibitor 2			3	8100029	MS/MS	STY:79.9663@IDEPS(0.0829)T(0.0829)PY(0.0829)HS(0.0829)MMGDDEDACS(0.6503)DT(0.0109)EAT(0.0071)EAMAPDILAR;
IDEPSTPYHSMMGDDEDACSDTEATEAMAPDILAR	IDEPS[79.9663]TPYHSMMGDDEDAC[57.0215]SDTEATEAMAPDILAR	K	K	68	102	35	3	19C(57.0215),5S(79.9663)	sp|P41236|IPP2_HUMAN	P41236	IPP2_HUMAN	PPP1R2	Protein phosphatase inhibitor 2			3	8100029	MS/MS	STY:79.9663@IDEPS(0.1817)T(0.1817)PY(0.1817)HS(0.1817)MMGDDEDACS(0.1722)DT(0.0670)EAT(0.0339)EAMAPDILAR;
IDEPSTPYHSMMGDDEDACSDTEATEAMAPDILAR	IDEPS[79.9663]TPYHSMMGDDEDAC[57.0215]S[79.9663]DTEATEAMAPDILAR	K	K	68	102	35	3	19C(57.0215),20S(79.9663),5S(79.9663)	sp|P41236|IPP2_HUMAN	P41236	IPP2_HUMAN	PPP1R2	Protein phosphatase inhibitor 2			1	0	MS/MS	STY:79.9663@IDEPS(0.3312)T(0.3312)PY(0.2714)HS(0.2714)MMGDDEDACS(0.3644)DT(0.2152)EAT(0.2152)EAMAPDILAR;
IDGATQSSPAEPK	IDGAT[79.9663]QSSPAEPK	K	S	707	719	13	2	5T(79.9663)	sp|Q32MZ4|LRRF1_HUMAN	Q32MZ4	LRRF1_HUMAN	LRRFIP1	Leucine-rich repeat flightless-interacting protein 1			6	1.98739e+06	MS/MS	STY:79.9663@IDGAT(0.7716)QS(0.1142)S(0.1142)PAEPK;
IDISPSTFR	IDISPST[79.9663]FR	R	K	679	687	9	2	7T(79.9663)	sp|Q9Y2W1|TR150_HUMAN	Q9Y2W1	TR150_HUMAN	THRAP3	Thyroid hormone receptor-associated protein 3			2	1.3810848E7	MS/MS	STY:79.9663@IDIS(0.0287)PS(0.0321)T(0.9391)FR;
IDISPSTFR	IDISPS[79.9663]TFR	R	K	679	687	9	2	6S(79.9663)	sp|Q9Y2W1|TR150_HUMAN	Q9Y2W1	TR150_HUMAN	THRAP3	Thyroid hormone receptor-associated protein 3			5	2.5080386E7	MS/MS	STY:79.9663@IDIS(0.0534)PS(0.8641)T(0.0825)FR;
IDISPSTLR	IDISPS[79.9663]TLR	R	K	655	663	9	2	6S(79.9663)	sp|Q9NYF8|BCLF1_HUMAN	Q9NYF8	BCLF1_HUMAN	BCLAF1	Bcl-2-associated transcription factor 1			1	1.1862252E7	MS/MS	STY:79.9663@IDIS(0.0186)PS(0.4907)T(0.4907)LR;
IDISPSTFR	IDIS[79.9663]PSTFR	R	K	679	687	9	2	4S(79.9663)	sp|Q9Y2W1|TR150_HUMAN	Q9Y2W1	TR150_HUMAN	THRAP3	Thyroid hormone receptor-associated protein 3			12	2.9565134E7	MS/MS	STY:79.9663@IDIS(0.9449)PS(0.0275)T(0.0275)FR;
IDISPSTLR	IDIS[79.9663]PSTLR	R	K	655	663	9	2	4S(79.9663)	sp|Q9NYF8|BCLF1_HUMAN	Q9NYF8	BCLF1_HUMAN	BCLAF1	Bcl-2-associated transcription factor 1			13	3.3605536E7	MS/MS	STY:79.9663@IDIS(0.4891)PS(0.4891)T(0.0217)LR;
IEDVGSDEEDDSGK	IEDVGSDEEDDS[79.9663]GK	K	D	250	263	14	2	12S(79.9663)	sp|P08238|HS90B_HUMAN	P08238	HS90B_HUMAN	HSP90AB1	Heat shock protein HSP 90-beta	HSP90AB2P	sp|Q58FF8|H90B2_HUMAN	31	1.52609574E9	MS/MS	STY:79.9663@IEDVGS(0.0536)DEEDDS(0.9464)GK;
IEDVGSDEEDDSGKDK	IEDVGSDEEDDS[79.9663]GKDK	K	K	250	265	16	2	12S(79.9663)	sp|P08238|HS90B_HUMAN	P08238	HS90B_HUMAN	HSP90AB1	Heat shock protein HSP 90-beta	HSP90AB2P	sp|Q58FF8|H90B2_HUMAN	1	630364	MS/MS	STY:79.9663@IEDVGS(0.3391)DEEDDS(0.6609)GKDK;
IEDVGSDEEDDSGK	IEDVGS[79.9663]DEEDDSGK	K	D	250	263	14	2	6S(79.9663)	sp|P08238|HS90B_HUMAN	P08238	HS90B_HUMAN	HSP90AB1	Heat shock protein HSP 90-beta	HSP90AB2P	sp|Q58FF8|H90B2_HUMAN	125	1.52609574E9	MS/MS	STY:79.9663@IEDVGS(0.9468)DEEDDS(0.0532)GK;
IEDVGSDEEDDSGKDK	IEDVGS[79.9663]DEEDDSGKDK	K	K	250	265	16	2	6S(79.9663)	sp|P08238|HS90B_HUMAN	P08238	HS90B_HUMAN	HSP90AB1	Heat shock protein HSP 90-beta	HSP90AB2P	sp|Q58FF8|H90B2_HUMAN	7	1.63282e+06	MS/MS	STY:79.9663@IEDVGS(0.9409)DEEDDS(0.0591)GKDK;
IEDVGSDEEDDSGK	IEDVGS[79.9663]DEEDDS[79.9663]GK	K	D	250	263	14	2	12S(79.9663),6S(79.9663)	sp|P08238|HS90B_HUMAN	P08238	HS90B_HUMAN	HSP90AB1	Heat shock protein HSP 90-beta	HSP90AB2P	sp|Q58FF8|H90B2_HUMAN	9	1.79875e+06	MS/MS	STY:79.9663@IEDVGS(1.0000)DEEDDS(1.0000)GK;
IEEVLSPEGSPSK	IEEVLS[79.9663]PEGSPSK	K	S	668	680	13	2	6S(79.9663)	sp|Q9UEY8|ADDG_HUMAN	Q9UEY8	ADDG_HUMAN	ADD3	Gamma-adducin			1	0	MS/MS	STY:79.9663@IEEVLS(0.6674)PEGS(0.1663)PS(0.1663)K;
IEIPVTPTGQSVPSSPSIPGTPTLK	IEIPVTPTGQSVPS[79.9663]SPSIPGTPTLK	K	M	130	154	25	3	14S(79.9663)	sp|Q9H4Z3|CAPAM_HUMAN	Q9H4Z3	CAPAM_HUMAN	PCIF1	mRNA (2'-O-methyladenosine-N(6)-)-methyltransferase			1	0	MS/MS	STY:79.9663@IEIPVT(0.0070)PT(0.0109)GQS(0.0266)VPS(0.4541)S(0.4541)PS(0.0070)IPGT(0.0202)PT(0.0202)LK;
IESDVQEPTEPEDDLDIMLGNK	IESDVQEPT[79.9663]EPEDDLDIMLGNK	K	K	103	124	22	3	9T(79.9663)	sp|P20042|IF2B_HUMAN	P20042	IF2B_HUMAN	EIF2S2	Eukaryotic translation initiation factor 2 subunit 2			1	0	MS/MS	STY:79.9663@IES(0.0656)DVQEPT(0.9344)EPEDDLDIMLGNK;
IESDEEEDFENVGK	IES[79.9663]DEEEDFENVGK	R	V	1343	1356	14	2	3S(79.9663)	sp|Q96T23|RSF1_HUMAN	Q96T23	RSF1_HUMAN	RSF1	Remodeling and spacing factor 1			9	1.0623151E7	MS/MS	STY:79.9663@IES(1.0000)DEEEDFENVGK;
IETDEEESCDNAHGDANQPAR	IET[79.9663]DEEESC[57.0215]DNAHGDANQPAR	R	D	1303	1323	21	3	3T(79.9663),9C(57.0215)	sp|Q96T23|RSF1_HUMAN	Q96T23	RSF1_HUMAN	RSF1	Remodeling and spacing factor 1			4	716617	MS/MS	STY:79.9663@IET(0.9209)DEEES(0.0791)CDNAHGDANQPAR;
IETVLPAEFFEVLSSSQNGSYHR	IET[79.9663]VLPAEFFEVLS[79.9663]SSQNGSYHR	R	I	388	410	23	3	14S(79.9663),3T(79.9663)	sp|Q8TEM1|PO210_HUMAN	Q8TEM1	PO210_HUMAN	NUP210	Nuclear pore membrane glycoprotein 210			1	796849	MS/MS	STY:79.9663@IET(0.5402)VLPAEFFEVLS(0.4662)S(0.4662)S(0.4662)QNGS(0.0306)Y(0.0306)HR;
IFPPETSASVAATPPPSTASAPAAVNSSASADK	IFPPETSASVAATPPPSTASAPAAVNSS[79.9663]ASADK	R	P	356	388	33	3	28S(79.9663)	sp|P09874|PARP1_HUMAN	P09874	PARP1_HUMAN	PARP1	Poly [ADP-ribose] polymerase 1			1	5.49116e+06	MS/MS	STY:79.9663@IFPPET(0.0060)S(0.0060)AS(0.0060)VAAT(0.0088)PPPS(0.0088)T(0.0088)AS(0.0101)APAAVNS(0.0101)S(0.4676)AS(0.4676)ADK;
IFPPETSASVAATPPPSTASAPAAVNSSASADK	IFPPETSASVAATPPPST[79.9663]ASAPAAVNSSASADK	R	P	356	388	33	4	18T(79.9663)	sp|P09874|PARP1_HUMAN	P09874	PARP1_HUMAN	PARP1	Poly [ADP-ribose] polymerase 1			1	1.36456e+06	MS/MS	STY:79.9663@IFPPET(0.0120)S(0.0120)AS(0.0120)VAAT(0.0167)PPPS(0.0062)T(0.4612)AS(0.4612)APAAVNS(0.0062)S(0.0062)AS(0.0062)ADK;
IFPPETSASVAATPPPSTASAPAAVNSSASADK	IFPPETSASVAATPPPS[79.9663]TASAPAAVNSSASADK	R	P	356	388	33	3	17S(79.9663)	sp|P09874|PARP1_HUMAN	P09874	PARP1_HUMAN	PARP1	Poly [ADP-ribose] polymerase 1			4	5980439	MS/MS	STY:79.9663@IFPPET(0.0308)S(0.0308)AS(0.0078)VAAT(0.0175)PPPS(0.8786)T(0.0072)AS(0.0072)APAAVNS(0.0067)S(0.0067)AS(0.0067)ADK;
IFPPETSASVAATPPPSTASAPAAVNSSASADK	IFPPETSASVAAT[79.9663]PPPSTASAPAAVNSSASADK	R	P	356	388	33	3	13T(79.9663)	sp|P09874|PARP1_HUMAN	P09874	PARP1_HUMAN	PARP1	Poly [ADP-ribose] polymerase 1			2	5.49116e+06	MS/MS	STY:79.9663@IFPPET(0.0166)S(0.0166)AS(0.0166)VAAT(0.7489)PPPS(0.0057)T(0.0057)AS(0.0141)APAAVNS(0.0586)S(0.0586)AS(0.0586)ADK;
IFPPETSASVAATPPPSTASAPAAVNSSASADK	IFPPETSAS[79.9663]VAATPPPSTASAPAAVNSSASADK	R	P	356	388	33	3,4	9S(79.9663)	sp|P09874|PARP1_HUMAN	P09874	PARP1_HUMAN	PARP1	Poly [ADP-ribose] polymerase 1			2	6855714	MS/MS	STY:79.9663@IFPPET(0.0059)S(0.0059)AS(0.4499)VAAT(0.4499)PPPS(0.0198)T(0.0198)AS(0.0198)APAAVNS(0.0097)S(0.0097)AS(0.0097)ADK;
IFPPETSASVAATPPPSTASAPAAVNSSASADK	IFPPET[79.9663]SASVAATPPPSTASAPAAVNSSASADK	R	P	356	388	33	3,4	6T(79.9663)	sp|P09874|PARP1_HUMAN	P09874	PARP1_HUMAN	PARP1	Poly [ADP-ribose] polymerase 1			7	7628664	MS/MS	STY:79.9663@IFPPET(0.7265)S(0.0084)AS(0.0074)VAAT(0.1489)PPPS(0.0103)T(0.0103)AS(0.0103)APAAVNS(0.0260)S(0.0260)AS(0.0260)ADK;
IGDEYAEDSSDEEDIR	IGDEY[79.9663]AEDS[79.9663]SDEEDIR	R	N	118	133	16	2	5Y(79.9663),9S(79.9663)	sp|Q14137|BOP1_HUMAN	Q14137	BOP1_HUMAN	BOP1	Ribosome biogenesis protein BOP1			1	1.06003e+06	MS/MS	STY:79.9663@IGDEY(0.6850)AEDS(0.6575)S(0.6575)DEEDIR;
IGEGTYGVVYK	IGEGTYGVVY[79.9663]K	K	G	10	20	11	2	10Y(79.9663)	sp|P06493|CDK1_HUMAN	P06493	CDK1_HUMAN	CDK1	Cyclin-dependent kinase 1	CDK2, CDK3	sp|P24941|CDK2_HUMAN, sp|Q00526|CDK3_HUMAN	5	5227021	MS/MS	STY:79.9663@IGEGT(0.0292)Y(0.0292)GVVY(0.9415)K;
IGEGTYGVVYK	IGEGTY[79.9663]GVVYK	K	G	10	20	11	2	6Y(79.9663)	sp|P06493|CDK1_HUMAN	P06493	CDK1_HUMAN	CDK1	Cyclin-dependent kinase 1	CDK2, CDK3	sp|P24941|CDK2_HUMAN, sp|Q00526|CDK3_HUMAN	2	1.92215e+06	MS/MS	STY:79.9663@IGEGT(0.0672)Y(0.8969)GVVY(0.0359)K;
IGEGTYGVVYK	IGEGTY[79.9663]GVVY[79.9663]K	K	G	10	20	11	2	10Y(79.9663),6Y(79.9663)	sp|P06493|CDK1_HUMAN	P06493	CDK1_HUMAN	CDK1	Cyclin-dependent kinase 1	CDK2, CDK3	sp|P24941|CDK2_HUMAN, sp|Q00526|CDK3_HUMAN	1	0	MS/MS	STY:79.9663@IGEGT(0.3821)Y(0.8101)GVVY(0.8078)K;
IGEGTYGVVYK	IGEGT[79.9663]YGVVYK	K	G	10	20	11	2	5T(79.9663)	sp|P06493|CDK1_HUMAN	P06493	CDK1_HUMAN	CDK1	Cyclin-dependent kinase 1	CDK2, CDK3	sp|P24941|CDK2_HUMAN, sp|Q00526|CDK3_HUMAN	4	4990480	MS/MS	STY:79.9663@IGEGT(0.3333)Y(0.3333)GVVY(0.3333)K;
IGEGTYGVVYK	IGEGT[79.9663]Y[79.9663]GVVYK	K	G	10	20	11	2	5T(79.9663),6Y(79.9663)	sp|P06493|CDK1_HUMAN	P06493	CDK1_HUMAN	CDK1	Cyclin-dependent kinase 1	CDK2, CDK3	sp|P24941|CDK2_HUMAN, sp|Q00526|CDK3_HUMAN	1	0	MS/MS	STY:79.9663@IGEGT(0.6667)Y(0.6667)GVVY(0.6667)K;
IGELGAPEVWGLSPK	IGELGAPEVWGLS[79.9663]PK	R	N	137	151	15	2	13S(79.9663)	sp|Q8N5F7|NKAP_HUMAN	Q8N5F7	NKAP_HUMAN	NKAP	NF-kappa-B-activating protein			1	1.09504e+06	MS/MS	STY:79.9663@IGELGAPEVWGLS(1.0000)PK;
IGPLGLSPK	IGPLGLS[79.9663]PK	K	K	32	40	9	2	7S(79.9663)	sp|P30050|RL12_HUMAN	P30050	RL12_HUMAN	RPL12	Large ribosomal subunit protein uL11			1	344229	MS/MS	STY:79.9663@IGPLGLS(1.0000)PK;
IILDLISESPIK	IILDLIS[79.9663]ESPIK	K	G	208	219	12	2	7S(79.9663)	sp|P61978|HNRPK_HUMAN	P61978	HNRPK_HUMAN	HNRNPK	Heterogeneous nuclear ribonucleoprotein K			2	0	MS/MS	STY:79.9663@IILDLIS(0.8750)ES(0.1250)PIK;
IIYDSDSESEETLQVK	IIY[79.9663]DS[79.9663]DSESEETLQVK	R	N	65	80	16	2	3Y(79.9663),5S(79.9663)	sp|P35251|RFC1_HUMAN	P35251	RFC1_HUMAN	RFC1	Replication factor C subunit 1			1	0	MS/MS	STY:79.9663@IIY(0.8835)DS(0.8835)DS(0.1442)ES(0.0396)EET(0.0491)LQVK;
ILEGDNGMDSDMEEEADDGSK	ILEGDNGMDSDMEEEADDGS[79.9663]K	K	M	194	214	21	2	20S(79.9663)	sp|Q9H8G2|CAAP1_HUMAN	Q9H8G2	CAAP1_HUMAN	CAAP1	Caspase activity and apoptosis inhibitor 1			3	3177366	MS/MS	STY:79.9663@ILEGDNGMDS(0.0630)DMEEEADDGS(0.9370)K;
ILEGDNGMDSDMEEEADDGSK	ILEGDNGMDS[79.9663]DMEEEADDGSK	K	M	194	214	21	2,3	10S(79.9663)	sp|Q9H8G2|CAAP1_HUMAN	Q9H8G2	CAAP1_HUMAN	CAAP1	Caspase activity and apoptosis inhibitor 1			4	3726359	MS/MS	STY:79.9663@ILEGDNGMDS(0.9377)DMEEEADDGS(0.0623)K;
ILGSASPEEEQEK	ILGS[79.9663]ASPEEEQEK	R	P	102	114	13	2	4S(79.9663)	sp|Q7Z422|SZRD1_HUMAN	Q7Z422	SZRD1_HUMAN	SZRD1	SUZ RNA-binding domain-containing			3	951734	MS/MS	STY:79.9663@ILGS(0.8494)AS(0.1506)PEEEQEK;
ILLVDSPGMGNADDEQQEEGTSSK	ILLVDSPGMGNADDEQQEEGT[79.9663]SSK	K	Q	606	629	24	3	21T(79.9663)	sp|Q9UKN8|TF3C4_HUMAN	Q9UKN8	TF3C4_HUMAN	GTF3C4	General transcription factor 3C polypeptide 4			1	1.26387e+06	MS/MS	STY:79.9663@ILLVDS(0.2243)PGMGNADDEQQEEGT(0.2586)S(0.2586)S(0.2586)K;
ILLVDSPGMGNADDEQQEEGTSSK	ILLVDS[79.9663]PGMGNADDEQQEEGTSSK	K	Q	606	629	24	3	6S(79.9663)	sp|Q9UKN8|TF3C4_HUMAN	Q9UKN8	TF3C4_HUMAN	GTF3C4	General transcription factor 3C polypeptide 4			5	3.2352e+06	MS/MS	STY:79.9663@ILLVDS(0.9289)PGMGNADDEQQEEGT(0.0237)S(0.0237)S(0.0237)K;
ILLVDSPGMGNADDEQQEEGTSSK	ILLVDS[79.9663]PGM[15.9949]GNADDEQQEEGTSSK	K	Q	606	629	24	3	6S(79.9663),9M(15.9949)	sp|Q9UKN8|TF3C4_HUMAN	Q9UKN8	TF3C4_HUMAN	GTF3C4	General transcription factor 3C polypeptide 4			1	0	MS/MS	STY:79.9663@ILLVDS(0.8703)PGMGNADDEQQEEGT(0.0432)S(0.0432)S(0.0432)K;M:15.9949@ILLVDSPGM(1.0000)GNADDEQQEEGTSSK;
IMATPEQVGK	IMAT[79.9663]PEQVGK	K	M	452	461	10	2	4T(79.9663)	sp|P12956|XRCC6_HUMAN	P12956	XRCC6_HUMAN	XRCC6	X-ray repair cross-complementing protein 6			1	556492	MS/MS	STY:79.9663@IMAT(1.0000)PEQVGK;
INPPSSGGTSSSPIK	INPPSSGGTS[79.9663]SSPIK	R	A	437	451	15	2	10S(79.9663)	sp|P14859|PO2F1_HUMAN	P14859	PO2F1_HUMAN	POU2F1	POU domain, class 2, transcription factor 1			1	2.26945e+06	MS/MS	STY:79.9663@INPPS(0.0066)S(0.0066)GGT(0.0085)S(0.3261)S(0.3261)S(0.3261)PIK;
INPPSSGGTSSSPIK	INPPSS[79.9663]GGTSSSPIK	R	A	437	451	15	2	6S(79.9663)	sp|P14859|PO2F1_HUMAN	P14859	PO2F1_HUMAN	POU2F1	POU domain, class 2, transcription factor 1			1	2.26945e+06	MS/MS	STY:79.9663@INPPS(0.0136)S(0.8430)GGT(0.0359)S(0.0359)S(0.0359)S(0.0359)PIK;
INPPSSGGTSSSPIK	INPPS[79.9663]SGGTSSSPIK	R	A	437	451	15	2	5S(79.9663)	sp|P14859|PO2F1_HUMAN	P14859	PO2F1_HUMAN	POU2F1	POU domain, class 2, transcription factor 1			2	1.85844e+06	MS/MS	STY:79.9663@INPPS(0.1667)S(0.1667)GGT(0.1667)S(0.1667)S(0.1667)S(0.1667)PIK;
IPCESPPLEVVDTTASTK	IPC[57.0215]ES[79.9663]PPLEVVDTTASTK	K	R	2704	2721	18	2	3C(57.0215),5S(79.9663)	sp|P46013|KI67_HUMAN	P46013	KI67_HUMAN	MKI67	Proliferation marker protein Ki-67			1	786984	MS/MS	STY:79.9663@IPCES(0.2000)PPLEVVDT(0.2000)T(0.2000)AS(0.2000)T(0.2000)K;
IPNYQLSPTK	IPNY[79.9663]QLSPTK	R	L	426	435	10	2	4Y(79.9663)	sp|O60934|NBN_HUMAN	O60934	NBN_HUMAN	NBN	Nibrin			2	933086	MS/MS	STY:79.9663@IPNY(0.9308)QLS(0.0346)PT(0.0346)K;
IPSPLQPEMQGTPDDEPSEPEPSPSTLIYR	IPSPLQPEMQGTPDDEPSEPEPSPS[79.9663]TLIYR	R	N	180	209	30	3	25S(79.9663)	sp|Q96GY3|LIN37_HUMAN	Q96GY3	LIN37_HUMAN	LIN37	Protein lin-37 homolog			1	0	MS/MS	STY:79.9663@IPS(0.0475)PLQPEMQGT(0.0355)PDDEPS(0.0093)EPEPS(0.0109)PS(0.2990)T(0.2990)LIY(0.2990)R;
IQEQESSGEEDSDLSPEER	IQEQES[79.9663]SGEEDSDLSPEER	R	E	116	134	19	2	6S(79.9663)	sp|P41236|IPP2_HUMAN	P41236	IPP2_HUMAN	PPP1R2	Protein phosphatase inhibitor 2	PPP1R2B	sp|Q6NXS1|IPP2B_HUMAN	3	2184869	MS/MS	STY:79.9663@IQEQES(0.3282)S(0.3282)GEEDS(0.3282)DLS(0.0155)PEER;
IQEQESSGEEDSDLSPEER	IQEQES[79.9663]SGEEDSDLS[79.9663]PEER	R	E	116	134	19	3	15S(79.9663),6S(79.9663)	sp|P41236|IPP2_HUMAN	P41236	IPP2_HUMAN	PPP1R2	Protein phosphatase inhibitor 2	PPP1R2B	sp|Q6NXS1|IPP2B_HUMAN	1	0	MS/MS	STY:79.9663@IQEQES(0.5979)S(0.5979)GEEDS(0.1566)DLS(0.6475)PEER;
IQEQESSGEEDSDLSPEER	IQEQES[79.9663]SGEEDS[79.9663]DLSPEER	R	E	116	134	19	2	12S(79.9663),6S(79.9663)	sp|P41236|IPP2_HUMAN	P41236	IPP2_HUMAN	PPP1R2	Protein phosphatase inhibitor 2	PPP1R2B	sp|Q6NXS1|IPP2B_HUMAN	1	2.64734e+06	MS/MS	STY:79.9663@IQEQES(0.6049)S(0.6049)GEEDS(0.6525)DLS(0.1377)PEER;
IQEQESSGEEDSDLSPEER	IQEQES[79.9663]S[79.9663]GEEDSDLSPEER	R	E	116	134	19	2	6S(79.9663),7S(79.9663)	sp|P41236|IPP2_HUMAN	P41236	IPP2_HUMAN	PPP1R2	Protein phosphatase inhibitor 2	PPP1R2B	sp|Q6NXS1|IPP2B_HUMAN	2	2.64734e+06	MS/MS	STY:79.9663@IQEQES(0.8861)S(0.8861)GEEDS(0.1757)DLS(0.0521)PEER;
IQEVGEPSK	IQEVGEPS[79.9663]K	R	E	11	19	9	2	8S(79.9663)	sp|Q99442|SEC62_HUMAN	Q99442	SEC62_HUMAN	SEC62	Translocation protein SEC62			1	89860.5	MS/MS	STY:79.9663@IQEVGEPS(1.0000)K;
IQNSDDEER	IQNS[79.9663]DDEER	K	A	159	167	9	2	4S(79.9663)	sp|Q8WVC0|LEO1_HUMAN	Q8WVC0	LEO1_HUMAN	LEO1	RNA polymerase-associated protein LEO1			3	1.05086e+06	MS/MS	STY:79.9663@IQNS(1.0000)DDEER;
IQPAGNTSPR	IQPAGNT[79.9663]SPR	R	A	356	365	10	2	7T(79.9663)	sp|P49674|KC1E_HUMAN	P49674	KC1E_HUMAN	CSNK1E	Casein kinase I isoform epsilon			1	938824	MS/MS	STY:79.9663@IQPAGNT(0.5000)S(0.5000)PR;
IQPLEPDSPTGLSENPTPATEK	IQPLEPDS[79.9663]PTGLSENPTPATEK	K	L	996	1017	22	3	8S(79.9663)	sp|Q9ULJ3|ZBT21_HUMAN	Q9ULJ3	ZBT21_HUMAN	ZBTB21	Zinc finger and BTB domain-containing protein 21			1	226665	MS/MS	STY:79.9663@IQPLEPDS(0.2541)PT(0.2541)GLS(0.2541)ENPT(0.1189)PAT(0.1189)EK;
IQPQPPDEDGDHSDKEDEQPQVVVLK	IQPQPPDEDGDHS[79.9663]DKEDEQPQVVVLK	R	K	38	63	26	3,4	13S(79.9663)	sp|Q96AT1|K1143_HUMAN	Q96AT1	K1143_HUMAN	KIAA1143	Uncharacterized protein KIAA1143			4	3.37091e+06	MS/MS	STY:79.9663@IQPQPPDEDGDHS(1.0000)DKEDEQPQVVVLK;
IQQFDDGGSDEEDIWEEK	IQQFDDGGS[79.9663]DEEDIWEEK	R	H	609	626	18	2	9S(79.9663)	sp|Q5H9R7|PP6R3_HUMAN	Q5H9R7	PP6R3_HUMAN	PPP6R3	Serine/threonine-protein phosphatase 6 regulatory subunit 3			2	2.96979e+06	MS/MS	STY:79.9663@IQQFDDGGS(1.0000)DEEDIWEEK;
ISLEQPPNGSDTPNPEK	ISLEQPPNGS[79.9663]DTPNPEK	R	Y	694	710	17	2	10S(79.9663)	sp|Q9UHI6|DDX20_HUMAN	Q9UHI6	DDX20_HUMAN	DDX20	Probable ATP-dependent RNA helicase DDX20			1	913610	MS/MS	STY:79.9663@IS(0.0193)LEQPPNGS(0.4903)DT(0.4903)PNPEK;
ISLPGQMAGTPITPLK	ISLPGQMAGTPIT[79.9663]PLK	K	D	213	228	16	2	13T(79.9663)	sp|Q9H8Y8|GORS2_HUMAN	Q9H8Y8	GORS2_HUMAN	GORASP2	Golgi reassembly-stacking protein 2			1	801576	MS/MS	STY:79.9663@IS(0.0368)LPGQMAGT(0.0385)PIT(0.9247)PLK;
ISMQDVDLSLGSPK	ISMQDVDLS[79.9663]LGSPK	K	L	500	513	14	2	9S(79.9663)	sp|Q09666|AHNK_HUMAN	Q09666	AHNK_HUMAN	AHNAK	Neuroblast differentiation-associated protein AHNAK			1	1.01474e+06	MS/MS	STY:79.9663@IS(0.0422)MQDVDLS(0.9129)LGS(0.0448)PK;
ISPLSSPCSSPLQGTPASSLVSK	ISPLSSPC[57.0215]SSPLQGTPAS[79.9663]SLVSK	K	I	519	541	23	3	18S(79.9663),8C(57.0215)	sp|Q14432|PDE3A_HUMAN	Q14432	PDE3A_HUMAN	PDE3A	cGMP-inhibited 3',5'-cyclic phosphodiesterase 3A			1	2.753e+06	MS/MS	STY:79.9663@IS(0.0074)PLS(0.0110)S(0.0110)PCS(0.0110)S(0.0110)PLQGT(0.0110)PAS(0.3126)S(0.3126)LVS(0.3126)K;
ISPLSSPCSSPLQGTPASSLVSK	ISPLSSPC[57.0215]SSPLQGT[79.9663]PASSLVSK	K	I	519	541	23	3	15T(79.9663),8C(57.0215)	sp|Q14432|PDE3A_HUMAN	Q14432	PDE3A_HUMAN	PDE3A	cGMP-inhibited 3',5'-cyclic phosphodiesterase 3A			1	2.753e+06	MS/MS	STY:79.9663@IS(0.1219)PLS(0.1219)S(0.1219)PCS(0.0068)S(0.0068)PLQGT(0.6047)PAS(0.0054)S(0.0054)LVS(0.0054)K;
ISPLSSPCSSPLQGTPASSLVSK	ISPLSSPC[57.0215]SS[79.9663]PLQGTPASSLVSK	K	I	519	541	23	3	10S(79.9663),8C(57.0215)	sp|Q14432|PDE3A_HUMAN	Q14432	PDE3A_HUMAN	PDE3A	cGMP-inhibited 3',5'-cyclic phosphodiesterase 3A			2	2.753e+06	MS/MS	STY:79.9663@IS(0.0344)PLS(0.0063)S(0.0063)PCS(0.0068)S(0.8191)PLQGT(0.0346)PAS(0.0363)S(0.0290)LVS(0.0273)K;
ISPLSSPCSSPLQGTPASSLVSK	ISPLSS[79.9663]PC[57.0215]SSPLQGTPASSLVSK	K	I	519	541	23	3	6S(79.9663),8C(57.0215)	sp|Q14432|PDE3A_HUMAN	Q14432	PDE3A_HUMAN	PDE3A	cGMP-inhibited 3',5'-cyclic phosphodiesterase 3A			1	2.753e+06	MS/MS	STY:79.9663@IS(0.0111)PLS(0.0111)S(0.8655)PCS(0.0076)S(0.0072)PLQGT(0.0230)PAS(0.0248)S(0.0248)LVS(0.0248)K;
ISPLSSPCSSPLQGTPASSLVSK	ISPLS[79.9663]SPC[57.0215]SSPLQGTPASSLVSK	K	I	519	541	23	3	5S(79.9663),8C(57.0215)	sp|Q14432|PDE3A_HUMAN	Q14432	PDE3A_HUMAN	PDE3A	cGMP-inhibited 3',5'-cyclic phosphodiesterase 3A			1	0	MS/MS	STY:79.9663@IS(0.1543)PLS(0.2076)S(0.2076)PCS(0.2076)S(0.2076)PLQGT(0.0039)PAS(0.0039)S(0.0039)LVS(0.0039)K;
ISAKTLTDEVNSPDSDR	IS[79.9663]AKTLTDEVNSPDSDR	K	R	272	288	17	3	2S(79.9663)	sp|Q8TAQ2|SMRC2_HUMAN	Q8TAQ2	SMRC2_HUMAN	SMARCC2	SWI/SNF complex subunit SMARCC2			1	0	MS/MS	STY:79.9663@IS(0.3282)AKT(0.3282)LT(0.3282)DEVNS(0.0078)PDS(0.0075)DR;
ISDSESEDPPR	IS[79.9663]DSESEDPPR	R	H	247	257	11	2	2S(79.9663)	sp|Q96ST2|IWS1_HUMAN	Q96ST2	IWS1_HUMAN	IWS1	Protein IWS1 homolog			1	1.13206e+06	MS/MS	STY:79.9663@IS(0.3333)DS(0.3333)ES(0.3333)EDPPR;
ISEDETER	IS[79.9663]EDETER	R	N	897	904	8	2	2S(79.9663)	sp|Q9UKV3|ACINU_HUMAN	Q9UKV3	ACINU_HUMAN	ACIN1	Apoptotic chromatin condensation inducer in the nucleus			1	293813	MS/MS	STY:79.9663@IS(0.5000)EDET(0.5000)ER;
ISNLSPEEEQGLWK	IS[79.9663]NLSPEEEQGLWK	K	Q	189	202	14	2	2S(79.9663)	sp|Q5HYJ3|FA76B_HUMAN	Q5HYJ3	FA76B_HUMAN	FAM76B	Protein FAM76B			1	723778	MS/MS	STY:79.9663@IS(0.5000)NLS(0.5000)PEEEQGLWK;
ISTVAVQSVNAGAPLITSTSPTTATSPK	IS[79.9663]TVAVQSVNAGAPLITSTSPTTATSPK	K	V	405	432	28	3	2S(79.9663)	sp|Q15723|ELF2_HUMAN	Q15723	ELF2_HUMAN	ELF2	ETS-related transcription factor Elf-2			1	892120	MS/MS	STY:79.9663@IS(0.4571)T(0.4571)VAVQS(0.0188)VNAGAPLIT(0.0107)S(0.0080)T(0.0080)S(0.0080)PT(0.0080)T(0.0080)AT(0.0080)S(0.0080)PK;
ITSPLMEPSSIEK	IT[79.9663]SPLMEPSSIEK	R	I	54	66	13	2	2T(79.9663)	sp|P28066|PSA5_HUMAN	P28066	PSA5_HUMAN	PSMA5	Proteasome subunit alpha type-5			2	1.36684e+06	MS/MS	STY:79.9663@IT(0.4735)S(0.4735)PLMEPS(0.0265)S(0.0265)IEK;
IVEPEVVGESDSEVEGDAWR	IVEPEVVGES[79.9663]DSEVEGDAWR	K	M	107	126	20	2	10S(79.9663)	sp|P55081|MFAP1_HUMAN	P55081	MFAP1_HUMAN	MFAP1	Microfibrillar-associated protein 1			1	701729	MS/MS	STY:79.9663@IVEPEVVGES(0.5000)DS(0.5000)EVEGDAWR;
IVEYSPPSAPR	IVEY[79.9663]SPPSAPR	R	R	124	134	11	2	4Y(79.9663)	sp|O95696|BRD1_HUMAN	O95696	BRD1_HUMAN	BRD1	Bromodomain-containing protein 1			2	851448	MS/MS	STY:79.9663@IVEY(0.4917)S(0.4917)PPS(0.0167)APR;
IVPQSQVPNPESPGK	IVPQS[79.9663]QVPNPESPGK	K	S	436	450	15	2	5S(79.9663)	sp|Q9ULM3|YETS2_HUMAN	Q9ULM3	YETS2_HUMAN	YEATS2	YEATS domain-containing protein 2			1	0	MS/MS	STY:79.9663@IVPQS(0.8938)QVPNPES(0.1062)PGK;
IVRGDQPAASGDSDDDEPPPLPR	IVRGDQPAASGDS[79.9663]DDDEPPPLPR	K	L	45	67	23	3	13S(79.9663)	sp|O00264|PGRC1_HUMAN	O00264	PGRC1_HUMAN	PGRMC1	Membrane-associated progesterone receptor component 1			5	2.93619e+06	MS/MS	STY:79.9663@IVRGDQPAAS(0.0568)GDS(0.9432)DDDEPPPLPR;
IVRGDQPAASGDSDDDEPPPLPR	IVRGDQPAAS[79.9663]GDSDDDEPPPLPR	K	L	45	67	23	3	10S(79.9663)	sp|O00264|PGRC1_HUMAN	O00264	PGRC1_HUMAN	PGRMC1	Membrane-associated progesterone receptor component 1			6	2986407	MS/MS	STY:79.9663@IVRGDQPAAS(0.9267)GDS(0.0733)DDDEPPPLPR;
IYHLPDAESDEDEDFK	IYHLPDAES[79.9663]DEDEDFK	K	E	210	225	16	2,3	9S(79.9663)	sp|Q15019|SEPT2_HUMAN	Q15019	SEPT2_HUMAN	SEPTIN2	Septin-2			19	9428880	MS/MS	STY:79.9663@IY(0.0532)HLPDAES(0.9468)DEDEDFK;
IYNISGNGSPLADSK	IYNISGNGS[79.9663]PLADSK	R	E	211	225	15	2	9S(79.9663)	sp|Q53HL2|BOREA_HUMAN	Q53HL2	BOREA_HUMAN	CDCA8	Borealin			1	605648	MS/MS	STY:79.9663@IY(0.0131)NIS(0.0139)GNGS(0.4865)PLADS(0.4865)K;
IYHLPDAESDEDEDFK	IY[79.9663]HLPDAESDEDEDFK	K	E	210	225	16	2,3	2Y(79.9663)	sp|Q15019|SEPT2_HUMAN	Q15019	SEPT2_HUMAN	SEPTIN2	Septin-2			7	8.10526e+06	MS/MS	STY:79.9663@IY(0.8702)HLPDAES(0.1298)DEDEDFK;
IYNISGNGSPLADSK	IY[79.9663]NISGNGSPLADSK	R	E	211	225	15	2	2Y(79.9663)	sp|Q53HL2|BOREA_HUMAN	Q53HL2	BOREA_HUMAN	CDCA8	Borealin			1	605648	MS/MS	STY:79.9663@IY(0.3198)NIS(0.3198)GNGS(0.3198)PLADS(0.0407)K;
KADSDSEDK	KADS[79.9663]DSEDK	R	G	86	94	9	2	4S(79.9663)	sp|P83916|CBX1_HUMAN	P83916	CBX1_HUMAN	CBX1	Chromobox protein homolog 1			7	3.3865e+06	MS/MS	STY:79.9663@KADS(0.9036)DS(0.0964)EDK;
KAEGAATEEEGTPK	KAEGAATEEEGT[79.9663]PK	K	E	25	38	14	2,3	12T(79.9663)	sp|P80723|BASP1_HUMAN	P80723	BASP1_HUMAN	BASP1	Brain acid soluble protein 1			7	1.77038e+06	MS/MS	STY:79.9663@KAEGAAT(0.0705)EEEGT(0.9295)PK;
KAEGAATEEEGTPK	KAEGAAT[79.9663]EEEGTPK	K	E	25	38	14	2,3	7T(79.9663)	sp|P80723|BASP1_HUMAN	P80723	BASP1_HUMAN	BASP1	Brain acid soluble protein 1			12	1908963	MS/MS	STY:79.9663@KAEGAAT(0.8880)EEEGT(0.1120)PK;
KAEGEPQEESPLK	KAEGEPQEES[79.9663]PLK	K	S	168	180	13	2,3	10S(79.9663)	sp|Q9NYF8|BCLF1_HUMAN	Q9NYF8	BCLF1_HUMAN	BCLAF1	Bcl-2-associated transcription factor 1			42	1.577364E7	MS/MS	STY:79.9663@KAEGEPQEES(1.0000)PLK;
KAEQGSEEEGEGEEEEEEGGESK	KAEQGS[79.9663]EEEGEGEEEEEEGGESK	K	A	223	245	23	2,3	6S(79.9663)	sp|Q8NE71|ABCF1_HUMAN	Q8NE71	ABCF1_HUMAN	ABCF1	ATP-binding cassette sub-family F member 1			10	2703794	MS/MS	STY:79.9663@KAEQGS(0.9421)EEEGEGEEEEEEGGES(0.0579)K;
KAPTPQEK	KAPT[79.9663]PQEK	K	K	328	335	8	2	4T(79.9663)	sp|P35269|T2FA_HUMAN	P35269	T2FA_HUMAN	GTF2F1	General transcription factor IIF subunit 1			2	1.42745e+06	MS/MS	STY:79.9663@KAPT(1.0000)PQEK;
KASPEPPDSAEGALK	KASPEPPDS[79.9663]AEGALK	R	L	545	559	15	2	9S(79.9663)	sp|Q9H1B7|I2BPL_HUMAN	Q9H1B7	I2BPL_HUMAN	IRF2BPL	Probable E3 ubiquitin-protein ligase IRF2BPL			1	448898	MS/MS	STY:79.9663@KAS(0.1260)PEPPDS(0.8740)AEGALK;
KASPEPEGEAAGK	KAS[79.9663]PEPEGEAAGK	R	M	382	394	13	2	3S(79.9663)	sp|Q8IU81|I2BP1_HUMAN	Q8IU81	I2BP1_HUMAN	IRF2BP1	Interferon regulatory factor 2-binding protein 1			2	1.02872e+06	MS/MS	STY:79.9663@KAS(1.0000)PEPEGEAAGK;
KASPEPPDSAEGALK	KAS[79.9663]PEPPDSAEGALK	R	L	545	559	15	2	3S(79.9663)	sp|Q9H1B7|I2BPL_HUMAN	Q9H1B7	I2BPL_HUMAN	IRF2BPL	Probable E3 ubiquitin-protein ligase IRF2BPL			7	949584	MS/MS	STY:79.9663@KAS(0.9431)PEPPDS(0.0569)AEGALK;
KATGAATPK	KAT[79.9663]GAATPK	K	K	140	148	9	2	3T(79.9663)	sp|P10412|H14_HUMAN	P10412	H14_HUMAN	H1-4	Histone H1.4			1	329077	MS/MS	STY:79.9663@KAT(0.5000)GAAT(0.5000)PK;
KDDEDEEEEEEVSDS	KDDEDEEEEEEVS[79.9663]DS	R	-	382	396	15	2	13S(79.9663)	sp|Q8TAD8|SNIP1_HUMAN	Q8TAD8	SNIP1_HUMAN	SNIP1	Smad nuclear-interacting protein 1			1	0	MS/MS	STY:79.9663@KDDEDEEEEEEVS(0.5000)DS(0.5000);
KDDSDDDGGGWITPSNIK	KDDSDDDGGGWIT[79.9663]PSNIK	R	Q	198	215	18	2	13T(79.9663)	sp|Q9ULX3|NOB1_HUMAN	Q9ULX3	NOB1_HUMAN	NOB1	RNA-binding protein NOB1			1	678463	MS/MS	STY:79.9663@KDDS(0.1011)DDDGGGWIT(0.4494)PS(0.4494)NIK;
KDDSDDDGGGWITPSNIK	KDDS[79.9663]DDDGGGWITPSNIK	R	Q	198	215	18	2	4S(79.9663)	sp|Q9ULX3|NOB1_HUMAN	Q9ULX3	NOB1_HUMAN	NOB1	RNA-binding protein NOB1			3	678463	MS/MS	STY:79.9663@KDDS(0.9290)DDDGGGWIT(0.0424)PS(0.0286)NIK;
KEDSDEEEDDDSEEDEEDDEDEDEDEDEIEPAAMK	KEDSDEEEDDDS[79.9663]EEDEEDDEDEDEDEDEIEPAAMK	K	A	142	176	35	3	12S(79.9663)	sp|P19338|NUCL_HUMAN	P19338	NUCL_HUMAN	NCL	Nucleolin			2	1.97953e+06	MS/MS	STY:79.9663@KEDS(0.0928)DEEEDDDS(0.9072)EEDEEDDEDEDEDEDEIEPAAMK;
KEDSDEEEDDDSEEDEEDDEDEDEDEDEIEPAAMK	KEDS[79.9663]DEEEDDDSEEDEEDDEDEDEDEDEIEPAAMK	K	A	142	176	35	3	4S(79.9663)	sp|P19338|NUCL_HUMAN	P19338	NUCL_HUMAN	NCL	Nucleolin			3	3.39534e+06	MS/MS	STY:79.9663@KEDS(0.8987)DEEEDDDS(0.1013)EEDEEDDEDEDEDEDEIEPAAMK;
KEDSDEEEDDDSEEDEEDDEDEDEDEDEIEPAAMK	KEDS[79.9663]DEEEDDDS[79.9663]EEDEEDDEDEDEDEDEIEPAAMK	K	A	142	176	35	3,4	12S(79.9663),4S(79.9663)	sp|P19338|NUCL_HUMAN	P19338	NUCL_HUMAN	NCL	Nucleolin			40	1.18341248E8	MS/MS	STY:79.9663@KEDS(1.0000)DEEEDDDS(1.0000)EEDEEDDEDEDEDEDEIEPAAMK;
KEDSDEEEDDDSEEDEEDDEDEDEDEDEIEPAAMK	KEDS[79.9663]DEEEDDDS[79.9663]EEDEEDDEDEDEDEDEIEPAAM[15.9949]K	K	A	142	176	35	3,4	12S(79.9663),34M(15.9949),4S(79.9663)	sp|P19338|NUCL_HUMAN	P19338	NUCL_HUMAN	NCL	Nucleolin			13	1.6867056E7	MS/MS	STY:79.9663@KEDS(1.0000)DEEEDDDS(1.0000)EEDEEDDEDEDEDEDEIEPAAMK;M:15.9949@KEDSDEEEDDDSEEDEEDDEDEDEDEDEIEPAAM(1.0000)K;
KEESEESDDDMGFGLFD	KEESEES[79.9663]DDDM[15.9949]GFGLFD	K	-	99	115	17	2	11M(15.9949),7S(79.9663)	sp|P05387|RLA2_HUMAN	P05387	RLA2_HUMAN	RPLP2	Large ribosomal subunit protein P2	RPLP1	sp|P05386|RLA1_HUMAN	2	0	MS/MS	STY:79.9663@KEES(0.0541)EES(0.9459)DDDMGFGLFD;M:15.9949@KEESEESDDDM(1.0000)GFGLFD;
KEESEESDDDMGFGLFD	KEES[79.9663]EESDDDMGFGLFD	K	-	99	115	17	2	4S(79.9663)	sp|P05387|RLA2_HUMAN	P05387	RLA2_HUMAN	RPLP2	Large ribosomal subunit protein P2	RPLP1	sp|P05386|RLA1_HUMAN	1	3.4891724E7	MS/MS	STY:79.9663@KEES(0.5000)EES(0.5000)DDDMGFGLFD;
KEESEESDDDMGFGLFD	KEES[79.9663]EES[79.9663]DDDMGFGLFD	K	-	99	115	17	2	4S(79.9663),7S(79.9663)	sp|P05387|RLA2_HUMAN	P05387	RLA2_HUMAN	RPLP2	Large ribosomal subunit protein P2	RPLP1	sp|P05386|RLA1_HUMAN	3	1.5177439E7	MS/MS	STY:79.9663@KEES(1.0000)EES(1.0000)DDDMGFGLFD;
KEESEESDDDMGFGLFD	KEES[79.9663]EES[79.9663]DDDM[15.9949]GFGLFD	K	-	99	115	17	2	11M(15.9949),4S(79.9663),7S(79.9663)	sp|P05387|RLA2_HUMAN	P05387	RLA2_HUMAN	RPLP2	Large ribosomal subunit protein P2	RPLP1	sp|P05386|RLA1_HUMAN	2	1.3262172E7	MS/MS	STY:79.9663@KEES(1.0000)EES(1.0000)DDDMGFGLFD;M:15.9949@KEESEESDDDM(1.0000)GFGLFD;
KEETPGTPK	KEET[79.9663]PGTPK	K	K	152	160	9	2	4T(79.9663)	sp|Q99442|SEC62_HUMAN	Q99442	SEC62_HUMAN	SEC62	Translocation protein SEC62			7	1.14286e+06	MS/MS	STY:79.9663@KEET(0.9222)PGT(0.0778)PK;
KEPAITSQNSPEAR	KEPAIT[79.9663]SQNSPEAR	K	E	91	104	14	2	6T(79.9663)	sp|P23193|TCEA1_HUMAN	P23193	TCEA1_HUMAN	TCEA1	Transcription elongation factor A protein 1			1	0	MS/MS	STY:79.9663@KEPAIT(0.3333)S(0.3333)QNS(0.3333)PEAR;
KEQESDEEEEEEEEDEPSGATTR	KEQES[79.9663]DEEEEEEEEDEPSGATTR	K	S	2982	3004	23	3	5S(79.9663)	sp|Q8NFC6|BD1L1_HUMAN	Q8NFC6	BD1L1_HUMAN	BOD1L1	Biorientation of chromosomes in cell division protein 1-like 1			3	423769	MS/MS	STY:79.9663@KEQES(0.9212)DEEEEEEEEDEPS(0.0263)GAT(0.0263)T(0.0263)R;
KETESEAEDNLDDLEK	KETES[79.9663]EAEDNLDDLEK	K	H	870	885	16	2,3	5S(79.9663)	sp|Q8IYB3|SRRM1_HUMAN	Q8IYB3	SRRM1_HUMAN	SRRM1	Serine/arginine repetitive matrix protein 1			6	1.0070426E7	MS/MS	STY:79.9663@KET(0.0597)ES(0.9403)EAEDNLDDLEK;
KETQSPEQVK	KETQS[79.9663]PEQVK	K	S	492	501	10	2	5S(79.9663)	sp|Q9NYF8|BCLF1_HUMAN	Q9NYF8	BCLF1_HUMAN	BCLAF1	Bcl-2-associated transcription factor 1			2	1.15905e+06	MS/MS	STY:79.9663@KET(0.0596)QS(0.9404)PEQVK;
KETESEAEDNLDDLEK	KET[79.9663]ESEAEDNLDDLEK	K	H	870	885	16	2,3	3T(79.9663)	sp|Q8IYB3|SRRM1_HUMAN	Q8IYB3	SRRM1_HUMAN	SRRM1	Serine/arginine repetitive matrix protein 1			27	1.0070426E7	MS/MS	STY:79.9663@KET(0.9416)ES(0.0584)EAEDNLDDLEK;
KETESEAEDNLDDLEK	KET[79.9663]ES[79.9663]EAEDNLDDLEK	K	H	870	885	16	2,3	3T(79.9663),5S(79.9663)	sp|Q8IYB3|SRRM1_HUMAN	Q8IYB3	SRRM1_HUMAN	SRRM1	Serine/arginine repetitive matrix protein 1			4	2.11999e+06	MS/MS	STY:79.9663@KET(1.0000)ES(1.0000)EAEDNLDDLEK;
KETPPPLVPPAAR	KET[79.9663]PPPLVPPAAR	R	E	3	15	13	2	3T(79.9663)	sp|Q9BQA1|MEP50_HUMAN	Q9BQA1	MEP50_HUMAN	WDR77	Methylosome protein WDR77			8	1.44436e+06	MS/MS	STY:79.9663@KET(1.0000)PPPLVPPAAR;
KETQSPEQVK	KET[79.9663]QSPEQVK	K	S	492	501	10	2	3T(79.9663)	sp|Q9NYF8|BCLF1_HUMAN	Q9NYF8	BCLF1_HUMAN	BCLAF1	Bcl-2-associated transcription factor 1			5	1.15905e+06	MS/MS	STY:79.9663@KET(0.5000)QS(0.5000)PEQVK;
KGAGDGSDEEVDGK	KGAGDGS[79.9663]DEEVDGK	R	A	1937	1950	14	2,3	7S(79.9663)	sp|P35579|MYH9_HUMAN	P35579	MYH9_HUMAN	MYH9	Myosin-9			53	1.3631527E7	MS/MS	STY:79.9663@KGAGDGS(1.0000)DEEVDGK;
KGGEFDEFVNDDTDDDLPISK	KGGEFDEFVNDDTDDDLPIS[79.9663]K	K	K	913	933	21	3	20S(79.9663)	sp|Q6PD62|CTR9_HUMAN	Q6PD62	CTR9_HUMAN	CTR9	RNA polymerase-associated protein CTR9 homolog			1	219510	MS/MS	STY:79.9663@KGGEFDEFVNDDT(0.4929)DDDLPIS(0.5071)K;
KGGEFDEFVNDDTDDDLPISK	KGGEFDEFVNDDT[79.9663]DDDLPISK	K	K	913	933	21	3	13T(79.9663)	sp|Q6PD62|CTR9_HUMAN	Q6PD62	CTR9_HUMAN	CTR9	RNA polymerase-associated protein CTR9 homolog			4	540231	MS/MS	STY:79.9663@KGGEFDEFVNDDT(0.9064)DDDLPIS(0.0936)K;
KGSSPSR	KGS[79.9663]SPSR	R	S	662	668	7	2	3S(79.9663)	sp|Q8IYB3|SRRM1_HUMAN	Q8IYB3	SRRM1_HUMAN	SRRM1	Serine/arginine repetitive matrix protein 1			1	1.20294e+06	MS/MS	STY:79.9663@KGS(0.3333)S(0.3333)PS(0.3333)R;
KLSGDQPAAR	KLS[79.9663]GDQPAAR	R	T	1348	1357	10	2	3S(79.9663)	sp|Q13428|TCOF_HUMAN	Q13428	TCOF_HUMAN	TCOF1	Treacle protein			20	1723963	MS/MS	STY:79.9663@KLS(1.0000)GDQPAAR;
KLTSDEEGEPSGK	KLTSDEEGEPS[79.9663]GK	K	R	627	639	13	2	11S(79.9663)	sp|Q8WVC0|LEO1_HUMAN	Q8WVC0	LEO1_HUMAN	LEO1	RNA polymerase-associated protein LEO1			1	518749	MS/MS	STY:79.9663@KLT(0.1297)S(0.1297)DEEGEPS(0.7405)GK;
KLTSDEEGEPSGK	KLT[79.9663]SDEEGEPSGK	K	R	627	639	13	2	3T(79.9663)	sp|Q8WVC0|LEO1_HUMAN	Q8WVC0	LEO1_HUMAN	LEO1	RNA polymerase-associated protein LEO1			7	1.34267e+06	MS/MS	STY:79.9663@KLT(0.4872)S(0.4872)DEEGEPS(0.0255)GK;
KMSDDEDDDEEEYGK	KMS[79.9663]DDEDDDEEEYGK	K	E	123	137	15	2	3S(79.9663)	sp|Q7KZ85|SPT6H_HUMAN	Q7KZ85	SPT6H_HUMAN	SUPT6H	Transcription elongation factor SPT6			3	597152	MS/MS	STY:79.9663@KMS(0.8974)DDEDDDEEEY(0.1026)GK;
KPAGATPK	KPAGAT[79.9663]PK	K	K	133	140	8	2	6T(79.9663)	sp|P16401|H15_HUMAN	P16401	H15_HUMAN	H1-5	Histone H1.5			5	2.2405e+06	MS/MS	STY:79.9663@KPAGAT(1.0000)PK;
KPATPAEDDEDDDIDLFGSDNEEEDK	KPATPAEDDEDDDIDLFGS[79.9663]DNEEEDK	K	E	144	169	26	3	19S(79.9663)	sp|P29692|EF1D_HUMAN	P29692	EF1D_HUMAN	EEF1D	Elongation factor 1-delta			27	1.46213232E8	MS/MS	STY:79.9663@KPAT(0.0538)PAEDDEDDDIDLFGS(0.9462)DNEEEDK;
KPATPAEDDEDDDIDLFGSDNEEEDK	KPAT[79.9663]PAEDDEDDDIDLFGSDNEEEDK	K	E	144	169	26	3	4T(79.9663)	sp|P29692|EF1D_HUMAN	P29692	EF1D_HUMAN	EEF1D	Elongation factor 1-delta			20	1.46382672E8	MS/MS	STY:79.9663@KPAT(0.9468)PAEDDEDDDIDLFGS(0.0532)DNEEEDK;
KPATPAEDDEDDDIDLFGSDNEEEDK	KPAT[79.9663]PAEDDEDDDIDLFGS[79.9663]DNEEEDK	K	E	144	169	26	3	19S(79.9663),4T(79.9663)	sp|P29692|EF1D_HUMAN	P29692	EF1D_HUMAN	EEF1D	Elongation factor 1-delta			9	2.1983988E7	MS/MS	STY:79.9663@KPAT(1.0000)PAEDDEDDDIDLFGS(1.0000)DNEEEDK;
KPGSSSR	KPGS[79.9663]SSR	R	Q	275	281	7	2	4S(79.9663)	sp|A0A1B0GUY1|MRCOL_HUMAN	A0A1B0GUY1	MRCOL_HUMAN	MARCOL	MARCO-like protein			1	602774	MS/MS	STY:79.9663@KPGS(0.3333)S(0.3333)S(0.3333)R;
KPIETGSPK	KPIETGS[79.9663]PK	K	T	443	451	9	2	7S(79.9663)	sp|Q05519|SRS11_HUMAN	Q05519	SRS11_HUMAN	SRSF11	Serine/arginine-rich splicing factor 11			4	3195546	MS/MS	STY:79.9663@KPIET(0.0682)GS(0.9318)PK;
KPIETGSPK	KPIET[79.9663]GSPK	K	T	443	451	9	2	5T(79.9663)	sp|Q05519|SRS11_HUMAN	Q05519	SRS11_HUMAN	SRSF11	Serine/arginine-rich splicing factor 11			21	3304172	MS/MS	STY:79.9663@KPIET(0.9032)GS(0.0968)PK;
KPPAPPSPVQSQSPSTNWSPAVPVK	KPPAPPSPVQSQSPST[79.9663]NWSPAVPVK	K	K	763	787	25	3	16T(79.9663)	sp|Q8IYB3|SRRM1_HUMAN	Q8IYB3	SRRM1_HUMAN	SRRM1	Serine/arginine repetitive matrix protein 1			1	574566	MS/MS	STY:79.9663@KPPAPPS(0.0246)PVQS(0.0246)QS(0.0246)PS(0.0694)T(0.5212)NWS(0.3356)PAVPVK;
KPPAPPSPVQSQSPSTNWSPAVPVK	KPPAPPSPVQSQSPST[79.9663]NWS[79.9663]PAVPVK	K	K	763	787	25	3	16T(79.9663),19S(79.9663)	sp|Q8IYB3|SRRM1_HUMAN	Q8IYB3	SRRM1_HUMAN	SRRM1	Serine/arginine repetitive matrix protein 1			1	8633138	MS/MS	STY:79.9663@KPPAPPS(0.2587)PVQS(0.2587)QS(0.0231)PS(0.0470)T(0.7049)NWS(0.7076)PAVPVK;
KPPAPPSPVQSQSPSTNWSPAVPVK	KPPAPPSPVQS[79.9663]QSPS[79.9663]TNWSPAVPVK	K	K	763	787	25	3	11S(79.9663),15S(79.9663)	sp|Q8IYB3|SRRM1_HUMAN	Q8IYB3	SRRM1_HUMAN	SRRM1	Serine/arginine repetitive matrix protein 1			1	3.25833e+06	MS/MS	STY:79.9663@KPPAPPS(0.0701)PVQS(0.4757)QS(0.2173)PS(0.4123)T(0.4123)NWS(0.4123)PAVPVK;
KPPAPPSPVQSQSPSTNWSPAVPVK	KPPAPPSPVQS[79.9663]QS[79.9663]PSTNWSPAVPVK	K	K	763	787	25	3	11S(79.9663),13S(79.9663)	sp|Q8IYB3|SRRM1_HUMAN	Q8IYB3	SRRM1_HUMAN	SRRM1	Serine/arginine repetitive matrix protein 1			1	8633138	MS/MS	STY:79.9663@KPPAPPS(0.0623)PVQS(0.9215)QS(0.9256)PS(0.0285)T(0.0285)NWS(0.0336)PAVPVK;
KPPAPPSPVQSQSPSTNWSPAVPVK	KPPAPPS[79.9663]PVQSQSPSTNWSPAVPVK	K	K	763	787	25	3	7S(79.9663)	sp|Q8IYB3|SRRM1_HUMAN	Q8IYB3	SRRM1_HUMAN	SRRM1	Serine/arginine repetitive matrix protein 1			1	574566	MS/MS	STY:79.9663@KPPAPPS(0.8979)PVQS(0.0204)QS(0.0204)PS(0.0204)T(0.0204)NWS(0.0204)PAVPVK;
KPPAPPSPVQSQSPSTNWSPAVPVK	KPPAPPS[79.9663]PVQSQSPS[79.9663]TNWSPAVPVK	K	K	763	787	25	3	15S(79.9663),7S(79.9663)	sp|Q8IYB3|SRRM1_HUMAN	Q8IYB3	SRRM1_HUMAN	SRRM1	Serine/arginine repetitive matrix protein 1			1	1.72702e+06	MS/MS	STY:79.9663@KPPAPPS(0.5409)PVQS(0.0333)QS(0.0333)PS(0.4642)T(0.4642)NWS(0.4642)PAVPVK;
KPPAPPSPVQSQSPSTNWSPAVPVK	KPPAPPS[79.9663]PVQS[79.9663]QSPSTNWSPAVPVK	K	K	763	787	25	3	11S(79.9663),7S(79.9663)	sp|Q8IYB3|SRRM1_HUMAN	Q8IYB3	SRRM1_HUMAN	SRRM1	Serine/arginine repetitive matrix protein 1			6	8821980	MS/MS	STY:79.9663@KPPAPPS(0.5982)PVQS(0.5982)QS(0.5982)PS(0.0867)T(0.0867)NWS(0.0320)PAVPVK;
KPSPEPEGEVGPPK	KPS[79.9663]PEPEGEVGPPK	R	I	358	371	14	2	3S(79.9663)	sp|Q7Z5L9|I2BP2_HUMAN	Q7Z5L9	I2BP2_HUMAN	IRF2BP2	Interferon regulatory factor 2-binding protein 2			3	910914	MS/MS	STY:79.9663@KPS(1.0000)PEPEGEVGPPK;
KPVTVSPTTPTSPTEGEAS	KPVTVSPTTPTSPTEGEAS[79.9663]	R	-	505	523	19	2	19S(79.9663)	sp|Q9Y6G9|DC1L1_HUMAN	Q9Y6G9	DC1L1_HUMAN	DYNC1LI1	Cytoplasmic dynein 1 light intermediate chain 1			1	1.2194715E7	MS/MS	STY:79.9663@KPVT(0.0081)VS(0.0081)PT(0.0081)T(0.0081)PT(0.0084)S(0.0107)PT(0.0107)EGEAS(0.9380);
KPVTVSPTTPTSPTEGEAS	KPVTVSPTTPT[79.9663]SPTEGEAS	R	-	505	523	19	2	11T(79.9663)	sp|Q9Y6G9|DC1L1_HUMAN	Q9Y6G9	DC1L1_HUMAN	DYNC1LI1	Cytoplasmic dynein 1 light intermediate chain 1			1	1.2194715E7	MS/MS	STY:79.9663@KPVT(0.0089)VS(0.0089)PT(0.0089)T(0.0149)PT(0.9132)S(0.0107)PT(0.0094)EGEAS(0.0249);
KPVTVSPTTPTSPTEGEAS	KPVTVSPTT[79.9663]PTSPTEGEAS	R	-	505	523	19	2	9T(79.9663)	sp|Q9Y6G9|DC1L1_HUMAN	Q9Y6G9	DC1L1_HUMAN	DYNC1LI1	Cytoplasmic dynein 1 light intermediate chain 1			1	1.2194715E7	MS/MS	STY:79.9663@KPVT(0.0030)VS(0.0030)PT(0.0031)T(0.1982)PT(0.1982)S(0.1982)PT(0.1982)EGEAS(0.1982);
KPVTVSPTTPTSPTEGEAS	KPVTVS[79.9663]PTTPTSPTEGEAS	R	-	505	523	19	2	6S(79.9663)	sp|Q9Y6G9|DC1L1_HUMAN	Q9Y6G9	DC1L1_HUMAN	DYNC1LI1	Cytoplasmic dynein 1 light intermediate chain 1			1	1.15914e+06	MS/MS	STY:79.9663@KPVT(0.0052)VS(0.3070)PT(0.3070)T(0.3070)PT(0.0184)S(0.0184)PT(0.0184)EGEAS(0.0184);
KPVTVSPTTPTSPTEGEAS	KPVTVS[79.9663]PT[79.9663]TPTSPTEGEAS	R	-	505	523	19	2	6S(79.9663),8T(79.9663)	sp|Q9Y6G9|DC1L1_HUMAN	Q9Y6G9	DC1L1_HUMAN	DYNC1LI1	Cytoplasmic dynein 1 light intermediate chain 1			1	1.33024e+06	MS/MS	STY:79.9663@KPVT(0.0135)VS(0.4020)PT(0.4020)T(0.4020)PT(0.4020)S(0.1261)PT(0.1261)EGEAS(0.1261);
KPVTVSPTTPTSPTEGEAS	KPVT[79.9663]VSPTTPTSPTEGEAS	R	-	505	523	19	2	4T(79.9663)	sp|Q9Y6G9|DC1L1_HUMAN	Q9Y6G9	DC1L1_HUMAN	DYNC1LI1	Cytoplasmic dynein 1 light intermediate chain 1			1	1.15914e+06	MS/MS	STY:79.9663@KPVT(0.1590)VS(0.1590)PT(0.1590)T(0.1590)PT(0.1590)S(0.0683)PT(0.0683)EGEAS(0.0683);
KPVTVSPTTPTSPTEGEAS	KPVT[79.9663]VS[79.9663]PTTPTSPTEGEAS	R	-	505	523	19	2	4T(79.9663),6S(79.9663)	sp|Q9Y6G9|DC1L1_HUMAN	Q9Y6G9	DC1L1_HUMAN	DYNC1LI1	Cytoplasmic dynein 1 light intermediate chain 1			2	1.33024e+06	MS/MS	STY:79.9663@KPVT(0.3276)VS(0.3276)PT(0.0172)T(0.0172)PT(0.3276)S(0.3276)PT(0.3276)EGEAS(0.3276);
KQVEVDAQQCMLEILDTAGTEQFTAMRDLYMK	KQVEVDAQQC[57.0215]M[15.9949]LEILDT[79.9663]AGTEQFTAMRDLY[79.9663]MK	R	N	42	73	32	3	10C(57.0215),11M(15.9949),17T(79.9663),30Y(79.9663)	sp|P61224|RAP1B_HUMAN	P61224	RAP1B_HUMAN	RAP1B	Ras-related protein Rap-1b			1	0	MS/MS	STY:79.9663@KQVEVDAQQCMLEILDT(0.4978)AGT(0.4978)EQFT(0.4978)AMRDLY(0.5065)MK;M:15.9949@KQVEVDAQQCM(0.3498)LEILDTAGTEQFTAM(0.3251)RDLYM(0.3251)K;
KRESESESDETPPAAPQLIK	KRES[79.9663]ESES[79.9663]DET[79.9663]PPAAPQLIK	R	K	448	467	20	3	11T(79.9663),4S(79.9663),8S(79.9663)	sp|O60832|DKC1_HUMAN	O60832	DKC1_HUMAN	DKC1	H/ACA ribonucleoprotein complex subunit DKC1			2	1.51467e+06	MS/MS	STY:79.9663@KRES(0.7403)ES(0.7403)ES(0.7597)DET(0.7597)PPAAPQLIK;
KRETDDEGEDD	KRET[79.9663]DDEGEDD	R	-	241	251	11	2	4T(79.9663)	sp|Q92688|AN32B_HUMAN	Q92688	AN32B_HUMAN	ANP32B	Acidic leucine-rich nuclear phosphoprotein 32 family member B			44	2.72066e+06	MS/MS	STY:79.9663@KRET(1.0000)DDEGEDD;
KTSTSPPPEK	KTSTS[79.9663]PPPEK	K	S	219	228	10	2	5S(79.9663)	sp|Q9H1E3|NUCKS_HUMAN	Q9H1E3	NUCKS_HUMAN	NUCKS1	Nuclear ubiquitous casein and cyclin-dependent kinase substrate 1			5	2.49207e+06	MS/MS	STY:79.9663@KT(0.0189)S(0.0196)T(0.0200)S(0.9414)PPPEK;
KTSTSPPPEK	KTS[79.9663]TSPPPEK	K	S	219	228	10	2	3S(79.9663)	sp|Q9H1E3|NUCKS_HUMAN	Q9H1E3	NUCKS_HUMAN	NUCKS1	Nuclear ubiquitous casein and cyclin-dependent kinase substrate 1			2	1.03693e+06	MS/MS	STY:79.9663@KT(0.0088)S(0.3304)T(0.3304)S(0.3304)PPPEK;
KTSDANETEDHLESLICK	KT[79.9663]SDANETEDHLESLIC[57.0215]K	R	V	20	37	18	3	17C(57.0215),2T(79.9663)	sp|Q09161|NCBP1_HUMAN	Q09161	NCBP1_HUMAN	NCBP1	Nuclear cap-binding protein subunit 1			4	1.77e+06	MS/MS	STY:79.9663@KT(0.8289)S(0.0763)DANET(0.0504)EDHLES(0.0443)LICK;
KTSTSPPPEK	KT[79.9663]STSPPPEK	K	S	219	228	10	2	2T(79.9663)	sp|Q9H1E3|NUCKS_HUMAN	Q9H1E3	NUCKS_HUMAN	NUCKS1	Nuclear ubiquitous casein and cyclin-dependent kinase substrate 1			6	2.40626e+06	MS/MS	STY:79.9663@KT(0.5557)S(0.1481)T(0.1481)S(0.1481)PPPEK;
KVEEEQEADEEDVSEEEAESK	KVEEEQEADEEDVSEEEAES[79.9663]K	K	E	234	254	21	2,3	20S(79.9663)	sp|Q9H3N1|TMX1_HUMAN	Q9H3N1	TMX1_HUMAN	TMX1	Thioredoxin-related transmembrane protein 1			11	1.5190645E7	MS/MS	STY:79.9663@KVEEEQEADEEDVS(0.0548)EEEAES(0.9452)K;
KVEEEQEADEEDVSEEEAESK	KVEEEQEADEEDVS[79.9663]EEEAESK	K	E	234	254	21	2,3	14S(79.9663)	sp|Q9H3N1|TMX1_HUMAN	Q9H3N1	TMX1_HUMAN	TMX1	Thioredoxin-related transmembrane protein 1			25	1.5190645E7	MS/MS	STY:79.9663@KVEEEQEADEEDVS(0.9468)EEEAES(0.0532)K;
KVELSESEEDK	KVELS[79.9663]ES[79.9663]EEDK	R	G	459	469	11	2	5S(79.9663),7S(79.9663)	sp|Q8IYB3|SRRM1_HUMAN	Q8IYB3	SRRM1_HUMAN	SRRM1	Serine/arginine repetitive matrix protein 1			1	0	MS/MS	STY:79.9663@KVELS(1.0000)ES(1.0000)EEDK;
KVMDSDEDDDY	KVMDSDEDDDY[79.9663]	R	-	115	125	11	2	11Y(79.9663)	sp|O14737|PDCD5_HUMAN	O14737	PDCD5_HUMAN	PDCD5	Programmed cell death protein 5			1	1.21225e+06	MS/MS	STY:79.9663@KVMDS(0.0815)DEDDDY(0.9185);
KVMDSDEDDDY	KVMDS[79.9663]DEDDDY	R	-	115	125	11	2	5S(79.9663)	sp|O14737|PDCD5_HUMAN	O14737	PDCD5_HUMAN	PDCD5	Programmed cell death protein 5			6	2.67128e+06	MS/MS	STY:79.9663@KVMDS(0.9295)DEDDDY(0.0705);
KVVDYSQFQESDDADEDYGR	KVVDYSQFQESDDADEDY[79.9663]GR	R	D	9	28	20	3	18Y(79.9663)	sp|Q9H1E3|NUCKS_HUMAN	Q9H1E3	NUCKS_HUMAN	NUCKS1	Nuclear ubiquitous casein and cyclin-dependent kinase substrate 1			8	1.16851e+06	MS/MS	STY:79.9663@KVVDY(0.0222)S(0.0222)QFQES(0.0443)DDADEDY(0.9113)GR;
KVVDYSQFQESDDADEDYGR	KVVDYSQFQES[79.9663]DDADEDYGR	R	D	9	28	20	3	11S(79.9663)	sp|Q9H1E3|NUCKS_HUMAN	Q9H1E3	NUCKS_HUMAN	NUCKS1	Nuclear ubiquitous casein and cyclin-dependent kinase substrate 1			3	1.09391e+06	MS/MS	STY:79.9663@KVVDY(0.0271)S(0.0769)QFQES(0.8511)DDADEDY(0.0448)GR;
KVVDYSQFQESDDADEDYGR	KVVDY[79.9663]SQFQESDDADEDYGR	R	D	9	28	20	3	5Y(79.9663)	sp|Q9H1E3|NUCKS_HUMAN	Q9H1E3	NUCKS_HUMAN	NUCKS1	Nuclear ubiquitous casein and cyclin-dependent kinase substrate 1			1	129147	MS/MS	STY:79.9663@KVVDY(0.2500)S(0.2500)QFQES(0.2500)DDADEDY(0.2500)GR;
KVVVSPTK	KVVVS[79.9663]PTK	K	K	63	70	8	2	5S(79.9663)	sp|P19338|NUCL_HUMAN	P19338	NUCL_HUMAN	NCL	Nucleolin			18	4627330	MS/MS	STY:79.9663@KVVVS(0.9411)PT(0.0589)K;
KYVISDEEEEDDD	KYVIS[79.9663]DEEEEDDD	K	-	654	666	13	2	5S(79.9663)	sp|Q8WVC0|LEO1_HUMAN	Q8WVC0	LEO1_HUMAN	LEO1	RNA polymerase-associated protein LEO1			1	2.0558e+06	MS/MS	STY:79.9663@KY(0.1803)VIS(0.8197)DEEEEDDD;
KYVISDEEEEDDD	KY[79.9663]VISDEEEEDDD	K	-	654	666	13	2	2Y(79.9663)	sp|Q8WVC0|LEO1_HUMAN	Q8WVC0	LEO1_HUMAN	LEO1	RNA polymerase-associated protein LEO1			2	2.0558e+06	MS/MS	STY:79.9663@KY(0.6748)VIS(0.3252)DEEEEDDD;
LAAAEETAVSPR	LAAAEETAVS[79.9663]PR	R	K	139	150	12	2	10S(79.9663)	sp|Q9BUH6|PAXX_HUMAN	Q9BUH6	PAXX_HUMAN	PAXX	Protein PAXX			5	9107452	MS/MS	STY:79.9663@LAAAEET(0.0541)AVS(0.9459)PR;
LAAAEETAVSPR	LAAAEET[79.9663]AVSPR	R	K	139	150	12	2	7T(79.9663)	sp|Q9BUH6|PAXX_HUMAN	Q9BUH6	PAXX_HUMAN	PAXX	Protein PAXX			4	2760744	MS/MS	STY:79.9663@LAAAEET(0.8969)AVS(0.1031)PR;
LADYNGDDGNVGEYEADK	LADY[79.9663]NGDDGNVGEYEADK	K	Q	376	393	18	2	4Y(79.9663)	sp|Q6P4E1|GOLM2_HUMAN	Q6P4E1	GOLM2_HUMAN	GOLM2	Protein GOLM2			1	0	MS/MS	STY:79.9663@LADY(0.5000)NGDDGNVGEY(0.5000)EADK;
LAEAPSPAPTPSPTPVEDLGPQTSTSPGR	LAEAPSPAPTPSPTPVEDLGPQTSTS[79.9663]PGR	R	L	1536	1564	29	3	26S(79.9663)	sp|Q14160|SCRIB_HUMAN	Q14160	SCRIB_HUMAN	SCRIB	Protein scribble homolog			1	0	MS/MS	STY:79.9663@LAEAPS(0.0267)PAPT(0.2508)PS(0.0540)PT(0.0077)PVEDLGPQT(0.0184)S(0.0184)T(0.0184)S(0.6057)PGR;
LAEDEGDSEPEAVGQSR	LAEDEGDS[79.9663]EPEAVGQSR	R	G	1461	1477	17	3	8S(79.9663)	sp|Q9UIG0|BAZ1B_HUMAN	Q9UIG0	BAZ1B_HUMAN	BAZ1B	Tyrosine-protein kinase BAZ1B			2	1.75959e+06	MS/MS	STY:79.9663@LAEDEGDS(0.9292)EPEAVGQS(0.0708)R;
LAGGQTSQPTTPLTSPQR	LAGGQTSQPTTPLT[79.9663]SPQR	R	E	17	34	18	2	14T(79.9663)	sp|O95155|UBE4B_HUMAN	O95155	UBE4B_HUMAN	UBE4B	Ubiquitin conjugation factor E4 B			1	0	MS/MS	STY:79.9663@LAGGQT(0.0096)S(0.0096)QPT(0.0112)T(0.0112)PLT(0.4793)S(0.4793)PQR;
LALDGETLGEEEQEDEQPPWASPSPTSR	LALDGET[79.9663]LGEEEQEDEQPPWASPSPTSR	R	Q	1416	1443	28	3	7T(79.9663)	sp|Q14160|SCRIB_HUMAN	Q14160	SCRIB_HUMAN	SCRIB	Protein scribble homolog			1	0	MS/MS	STY:79.9663@LALDGET(0.6265)LGEEEQEDEQPPWAS(0.0934)PS(0.0934)PT(0.0934)S(0.0934)R;
LAPVPSPEPQK	LAPVPS[79.9663]PEPQK	K	P	199	209	11	2	6S(79.9663)	sp|Q96JM3|CHAP1_HUMAN	Q96JM3	CHAP1_HUMAN	CHAMP1	Chromosome alignment-maintaining phosphoprotein 1			6	1.72531e+06	MS/MS	STY:79.9663@LAPVPS(1.0000)PEPQK;
LAPVPSPEPQKPAPVSPESVK	LAPVPS[79.9663]PEPQKPAPVSPES[79.9663]VK	K	A	199	219	21	3	19S(79.9663),6S(79.9663)	sp|Q96JM3|CHAP1_HUMAN	Q96JM3	CHAP1_HUMAN	CHAMP1	Chromosome alignment-maintaining phosphoprotein 1			1	2.91485e+06	MS/MS	STY:79.9663@LAPVPS(0.7945)PEPQKPAPVS(0.4141)PES(0.7914)VK;
LAPVPSPEPQKPAPVSPESVK	LAPVPS[79.9663]PEPQKPAPVS[79.9663]PESVK	K	A	199	219	21	3	16S(79.9663),6S(79.9663)	sp|Q96JM3|CHAP1_HUMAN	Q96JM3	CHAP1_HUMAN	CHAMP1	Chromosome alignment-maintaining phosphoprotein 1			3	2.91485e+06	MS/MS	STY:79.9663@LAPVPS(0.8704)PEPQKPAPVS(0.8704)PES(0.2593)VK;
LASDDRPSPPR	LASDDRPS[79.9663]PPR	K	G	716	726	11	2	8S(79.9663)	sp|P98175|RBM10_HUMAN	P98175	RBM10_HUMAN	RBM10	RNA-binding protein 10			5	3.69035e+06	MS/MS	STY:79.9663@LAS(0.0553)DDRPS(0.9447)PPR;
LASPSGSTSSGLEVVAPEGTSAPGGGPGTLDDSATICR	LASPSGSTSSGLEVVAPEGTS[79.9663]APGGGPGTLDDSATIC[57.0215]R	R	V	592	629	38	3	21S(79.9663),37C(57.0215)	sp|Q13263|TIF1B_HUMAN	Q13263	TIF1B_HUMAN	TRIM28	Transcription intermediary factor 1-beta			1	1.6050355E7	MS/MS	STY:79.9663@LAS(0.0104)PS(0.0104)GS(0.0104)T(0.0104)S(0.0104)S(0.0104)GLEVVAPEGT(0.0079)S(0.8587)APGGGPGT(0.0238)LDDS(0.0235)AT(0.0235)ICR;
LASVPAGGAVAVSAAPGSAAPAAGSAPAAAEEK	LASVPAGGAVAVSAAPGSAAPAAGS[79.9663]APAAAEEK	K	K	62	94	33	3	25S(79.9663)	sp|P05387|RLA2_HUMAN	P05387	RLA2_HUMAN	RPLP2	Large ribosomal subunit protein P2			1	1.74286e+06	MS/MS	STY:79.9663@LAS(0.0502)VPAGGAVAVS(0.0212)AAPGS(0.0216)AAPAAGS(0.9069)APAAAEEK;
LASVPAGGAVAVSAAPGSAAPAAGSAPAAAEEK	LASVPAGGAVAVSAAPGS[79.9663]AAPAAGSAPAAAEEK	K	K	62	94	33	3	18S(79.9663)	sp|P05387|RLA2_HUMAN	P05387	RLA2_HUMAN	RPLP2	Large ribosomal subunit protein P2			1	1.74286e+06	MS/MS	STY:79.9663@LAS(0.0166)VPAGGAVAVS(0.0190)AAPGS(0.6617)AAPAAGS(0.3027)APAAAEEK;
LASDDRPSPPR	LAS[79.9663]DDRPSPPR	K	G	716	726	11	2,3	3S(79.9663)	sp|P98175|RBM10_HUMAN	P98175	RBM10_HUMAN	RBM10	RNA-binding protein 10			9	4553650	MS/MS	STY:79.9663@LAS(0.9467)DDRPS(0.0533)PPR;
LASPSGSTSSGLEVVAPEGTSAPGGGPGTLDDSATICR	LAS[79.9663]PSGSTSSGLEVVAPEGTSAPGGGPGTLDDSATIC[57.0215]R	R	V	592	629	38	3	37C(57.0215),3S(79.9663)	sp|Q13263|TIF1B_HUMAN	Q13263	TIF1B_HUMAN	TRIM28	Transcription intermediary factor 1-beta			2	1.6050355E7	MS/MS	STY:79.9663@LAS(0.5947)PS(0.0439)GS(0.0136)T(0.0063)S(0.0063)S(0.0063)GLEVVAPEGT(0.1320)S(0.1320)APGGGPGT(0.0287)LDDS(0.0181)AT(0.0181)ICR;
LASPSGSTSSGLEVVAPEGTSAPGGGPGTLDDSATICR	LAS[79.9663]PS[79.9663]GSTSSGLEVVAPEGTSAPGGGPGTLDDSATIC[57.0215]R	R	V	592	629	38	3	37C(57.0215),3S(79.9663),5S(79.9663)	sp|Q13263|TIF1B_HUMAN	Q13263	TIF1B_HUMAN	TRIM28	Transcription intermediary factor 1-beta			1	0	MS/MS	STY:79.9663@LAS(0.3178)PS(0.2444)GS(0.2444)T(0.2444)S(0.2444)S(0.2444)GLEVVAPEGT(0.1468)S(0.1468)APGGGPGT(0.0083)LDDS(0.0793)AT(0.0793)ICR;
LASTSDIEEK	LAS[79.9663]TSDIEEK	R	E	505	514	10	2	3S(79.9663)	sp|O14974|MYPT1_HUMAN	O14974	MYPT1_HUMAN	PPP1R12A	Protein phosphatase 1 regulatory subunit 12A			1	222773	MS/MS	STY:79.9663@LAS(0.3333)T(0.3333)S(0.3333)DIEEK;
LASVPAGGAVAVSAAPGSAAPAAGSAPAAAEEK	LAS[79.9663]VPAGGAVAVSAAPGSAAPAAGSAPAAAEEK	K	K	62	94	33	3	3S(79.9663)	sp|P05387|RLA2_HUMAN	P05387	RLA2_HUMAN	RPLP2	Large ribosomal subunit protein P2			2	1.74286e+06	MS/MS	STY:79.9663@LAS(0.8752)VPAGGAVAVS(0.0416)AAPGS(0.0416)AAPAAGS(0.0416)APAAAEEK;
LATNTSAPDLK	LAT[79.9663]NTSAPDLK	R	N	923	933	11	2	3T(79.9663)	sp|P27816|MAP4_HUMAN	P27816	MAP4_HUMAN	MAP4	Microtubule-associated protein 4			1	656392	MS/MS	STY:79.9663@LAT(0.3333)NT(0.3333)S(0.3333)APDLK;
LCDDGPQLPTSPR	LC[57.0215]DDGPQLPT[79.9663]SPR	R	L	520	532	13	2	10T(79.9663),2C(57.0215)	sp|O60504|VINEX_HUMAN	O60504	VINEX_HUMAN	SORBS3	Vinexin			6	2947654	MS/MS	STY:79.9663@LCDDGPQLPT(0.5000)S(0.5000)PR;
LCDFGSASHVADNDITPYLVSR	LC[57.0215]DFGSASHVADNDITPYLVS[79.9663]R	K	F	832	853	22	3	21S(79.9663),2C(57.0215)	sp|Q13523|PRP4K_HUMAN	Q13523	PRP4K_HUMAN	PRP4K	Serine/threonine-protein kinase PRP4 homolog			3	1.41927e+06	MS/MS	STY:79.9663@LCDFGS(0.0198)AS(0.0198)HVADNDIT(0.0139)PY(0.0259)LVS(0.9206)R;
LCDFGSASHVADNDITPYLVSR	LC[57.0215]DFGSASHVADNDIT[79.9663]PYLVSR	K	F	832	853	22	3	16T(79.9663),2C(57.0215)	sp|Q13523|PRP4K_HUMAN	Q13523	PRP4K_HUMAN	PRP4K	Serine/threonine-protein kinase PRP4 homolog			1	1.41927e+06	MS/MS	STY:79.9663@LCDFGS(0.0337)AS(0.0337)HVADNDIT(0.3109)PY(0.3109)LVS(0.3109)R;
LCDFGSASHVADNDITPYLVSR	LC[57.0215]DFGS[79.9663]ASHVADNDITPYLVSR	K	F	832	853	22	3	2C(57.0215),6S(79.9663)	sp|Q13523|PRP4K_HUMAN	Q13523	PRP4K_HUMAN	PRP4K	Serine/threonine-protein kinase PRP4 homolog			1	1.41927e+06	MS/MS	STY:79.9663@LCDFGS(0.3953)AS(0.3953)HVADNDIT(0.0919)PY(0.0919)LVS(0.0256)R;
LCPSCPASSPK	LC[57.0215]PS[79.9663]C[57.0215]PASSPK	R	V	612	622	11	2	2C(57.0215),4S(79.9663),5C(57.0215)	sp|Q9Y4H2|IRS2_HUMAN	Q9Y4H2	IRS2_HUMAN	IRS2	Insulin receptor substrate 2			1	0	MS/MS	STY:79.9663@LCPS(0.3333)CPAS(0.3333)S(0.3333)PK;
LDEGTPPEPK	LDEGT[79.9663]PPEPK	K	G	1839	1848	10	2	5T(79.9663)	sp|Q9Y4G6|TLN2_HUMAN	Q9Y4G6	TLN2_HUMAN	TLN2	Talin-2			2	1.43645e+06	MS/MS	STY:79.9663@LDEGT(1.0000)PPEPK;
LDIDSPPITAR	LDIDS[79.9663]PPITAR	R	N	33	43	11	2	5S(79.9663)	sp|P14618|KPYM_HUMAN	P14618	KPYM_HUMAN	PKM	Pyruvate kinase PKM			5	2690891	MS/MS	STY:79.9663@LDIDS(0.9435)PPIT(0.0565)AR;
LDIPTGTTPQR	LDIPT[79.9663]GTTPQR	K	K	919	929	11	2	5T(79.9663)	sp|P52732|KIF11_HUMAN	P52732	KIF11_HUMAN	KIF11	Kinesin-like protein KIF11			1	690063	MS/MS	STY:79.9663@LDIPT(0.3333)GT(0.3333)T(0.3333)PQR;
LDQPVSAPPSPR	LDQPVSAPPS[79.9663]PR	K	D	235	246	12	2	10S(79.9663)	sp|Q16204|CCDC6_HUMAN	Q16204	CCDC6_HUMAN	CCDC6	Coiled-coil domain-containing protein 6			2	1.93684e+06	MS/MS	STY:79.9663@LDQPVS(0.0572)APPS(0.9428)PR;
LDQPVSAPPSPR	LDQPVS[79.9663]APPSPR	K	D	235	246	12	2	6S(79.9663)	sp|Q16204|CCDC6_HUMAN	Q16204	CCDC6_HUMAN	CCDC6	Coiled-coil domain-containing protein 6			3	1.93684e+06	MS/MS	STY:79.9663@LDQPVS(0.9197)APPS(0.0803)PR;
LDQPVSAPPSPR	LDQPVS[79.9663]APPS[79.9663]PR	K	D	235	246	12	2	10S(79.9663),6S(79.9663)	sp|Q16204|CCDC6_HUMAN	Q16204	CCDC6_HUMAN	CCDC6	Coiled-coil domain-containing protein 6			3	884394	MS/MS	STY:79.9663@LDQPVS(1.0000)APPS(1.0000)PR;
LDSQPQETSPELPR	LDSQPQETS[79.9663]PELPR	R	R	407	420	14	2	9S(79.9663)	sp|O14545|TRAD1_HUMAN	O14545	TRAD1_HUMAN	TRAFD1	TRAF-type zinc finger domain-containing protein 1			1	3.96702e+06	MS/MS	STY:79.9663@LDS(0.0760)QPQET(0.0760)S(0.8480)PELPR;
LDSQPQETSPELPR	LDSQPQET[79.9663]SPELPR	R	R	407	420	14	2	8T(79.9663)	sp|O14545|TRAD1_HUMAN	O14545	TRAD1_HUMAN	TRAFD1	TRAF-type zinc finger domain-containing protein 1			2	3.96702e+06	MS/MS	STY:79.9663@LDS(0.0808)QPQET(0.4596)S(0.4596)PELPR;
LDSSPSVSSTLAAK	LDSSPSVS[79.9663]STLAAK	K	D	1225	1238	14	2	8S(79.9663)	sp|Q13428|TCOF_HUMAN	Q13428	TCOF_HUMAN	TCOF1	Treacle protein			3	6.0261e+06	MS/MS	STY:79.9663@LDS(0.0082)S(0.0109)PS(0.0109)VS(0.3233)S(0.3233)T(0.3233)LAAK;
LDSSPSVSSTLAAK	LDSSPS[79.9663]VSSTLAAK	K	D	1225	1238	14	2	6S(79.9663)	sp|Q13428|TCOF_HUMAN	Q13428	TCOF_HUMAN	TCOF1	Treacle protein			2	6.0261e+06	MS/MS	STY:79.9663@LDS(0.0064)S(0.0064)PS(0.2468)VS(0.2468)S(0.2468)T(0.2468)LAAK;
LDSSPSVSSTLAAK	LDSS[79.9663]PSVSSTLAAK	K	D	1225	1238	14	2	4S(79.9663)	sp|Q13428|TCOF_HUMAN	Q13428	TCOF_HUMAN	TCOF1	Treacle protein			1	5.47885e+06	MS/MS	STY:79.9663@LDS(0.0041)S(0.1992)PS(0.1992)VS(0.1992)S(0.1992)T(0.1992)LAAK;
LDSPDPFK	LDS[79.9663]PDPFK	K	L	794	801	8	2	3S(79.9663)	sp|P42566|EPS15_HUMAN	P42566	EPS15_HUMAN	EPS15	Epidermal growth factor receptor substrate 15			3	862652	MS/MS	STY:79.9663@LDS(1.0000)PDPFK;
LDSSPSVSSTLAAK	LDS[79.9663]SPSVSSTLAAK	K	D	1225	1238	14	2	3S(79.9663)	sp|Q13428|TCOF_HUMAN	Q13428	TCOF_HUMAN	TCOF1	Treacle protein			3	5.47885e+06	MS/MS	STY:79.9663@LDS(0.4837)S(0.4837)PS(0.0082)VS(0.0082)S(0.0082)T(0.0082)LAAK;
LDSSPVSSPR	LDS[79.9663]SPVSSPR	R	K	946	955	10	2	3S(79.9663)	sp|O60293|ZC3H1_HUMAN	O60293	ZC3H1_HUMAN	ZFC3H1	Zinc finger C3H1 domain-containing protein			1	205988	MS/MS	STY:79.9663@LDS(0.2500)S(0.2500)PVS(0.2500)S(0.2500)PR;
LDSSEMDHSENEDYTMSSPLPGK	LDS[79.9663]S[79.9663]EMDHSENEDYTMSSPLPGK	R	K	1174	1196	23	3	3S(79.9663),4S(79.9663)	sp|Q9NTI5|PDS5B_HUMAN	Q9NTI5	PDS5B_HUMAN	PDS5B	Sister chromatid cohesion protein PDS5 homolog B			2	2366196	MS/MS	STY:79.9663@LDS(0.9345)S(0.9336)EMDHS(0.0333)ENEDY(0.0264)T(0.0264)MS(0.0229)S(0.0229)PLPGK;
LDTFCGSPPYAAPELFQGK	LDT[79.9663]FC[57.0215]GSPPYAAPELFQGK	K	K	209	227	19	3	3T(79.9663),5C(57.0215)	sp|P27448|MARK3_HUMAN	P27448	MARK3_HUMAN	MARK3	MAP/microtubule affinity-regulating kinase 3	MARK1, MARK2, MARK4	sp|Q7KZI7|MARK2_HUMAN, sp|Q96L34|MARK4_HUMAN, sp|Q9P0L2|MARK1_HUMAN	1	0	MS/MS	STY:79.9663@LDT(0.8496)FCGS(0.0752)PPY(0.0752)AAPELFQGK;
LDTGPQSLSGK	LDT[79.9663]GPQSLSGK	R	S	425	435	11	2	3T(79.9663)	sp|P35269|T2FA_HUMAN	P35269	T2FA_HUMAN	GTF2F1	General transcription factor IIF subunit 1			1	0	MS/MS	STY:79.9663@LDT(0.3333)GPQS(0.3333)LS(0.3333)GK;
LEAIITPPPAK	LEAIIT[79.9663]PPPAK	K	K	124	134	11	2	6T(79.9663)	sp|O75367|H2AY_HUMAN	O75367	H2AY_HUMAN	MACROH2A1	Core histone macro-H2A.1			3	706260	MS/MS	STY:79.9663@LEAIIT(1.0000)PPPAK;
LEDLDTCMMTPK	LEDLDT[79.9663]C[57.0215]MMTPK	R	S	907	918	12	2	6T(79.9663),7C(57.0215)	sp|Q5VZK9|CARL1_HUMAN	Q5VZK9	CARL1_HUMAN	CARMIL1	F-actin-uncapping protein LRRC16A			1	578606	MS/MS	STY:79.9663@LEDLDT(0.7409)CMMT(0.2591)PK;
LEEPPELNRQSPNPR	LEEPPELNRQS[79.9663]PNPR	K	R	165	179	15	3	11S(79.9663)	sp|Q7Z5L9|I2BP2_HUMAN	Q7Z5L9	I2BP2_HUMAN	IRF2BP2	Interferon regulatory factor 2-binding protein 2			1	462062	MS/MS	STY:79.9663@LEEPPELNRQS(1.0000)PNPR;
LEGQGDVPTPK	LEGQGDVPT[79.9663]PK	K	Q	257	267	11	2	9T(79.9663)	sp|Q9Y2Z0|SGT1_HUMAN	Q9Y2Z0	SGT1_HUMAN	SUGT1	Protein SGT1 homolog			6	1534224	MS/MS	STY:79.9663@LEGQGDVPT(1.0000)PK;
LEGVDGGQSPR	LEGVDGGQS[79.9663]PR	R	A	10	20	11	2	9S(79.9663)	sp|O00418|EF2K_HUMAN	O00418	EF2K_HUMAN	EEF2K	Eukaryotic elongation factor 2 kinase			2	1140053	MS/MS	STY:79.9663@LEGVDGGQS(1.0000)PR;
LENEGSDEDIETDVLYSPQMALK	LENEGS[79.9663]DEDIETDVLYSPQMALK	K	L	359	381	23	3	6S(79.9663)	sp|O60502|OGA_HUMAN	O60502	OGA_HUMAN	OGA	Protein O-GlcNAcase			1	330838	MS/MS	STY:79.9663@LENEGS(0.8621)DEDIET(0.0521)DVLY(0.0429)S(0.0429)PQMALK;
LEPASPPEDTSAEVSR	LEPAS[79.9663]PPEDTSAEVSR	K	A	444	459	16	2	5S(79.9663)	sp|Q9UHL9|GT2D1_HUMAN	Q9UHL9	GT2D1_HUMAN	GTF2IRD1	General transcription factor II-I repeat domain-containing protein 1			1	1.31393e+06	MS/MS	STY:79.9663@LEPAS(0.3295)PPEDT(0.3295)S(0.3295)AEVS(0.0115)R;
LEQTSVRDPSPEADAPVLGSPEK	LEQTSVRDPSPEADAPVLGS[79.9663]PEK	R	E	354	376	23	3	20S(79.9663)	sp|O15234|CASC3_HUMAN	O15234	CASC3_HUMAN	CASC3	Protein CASC3			1	490712	MS/MS	STY:79.9663@LEQT(0.0308)S(0.0308)VRDPS(0.0308)PEADAPVLGS(0.9077)PEK;
LEQTSVRDPSPEADAPVLGSPEK	LEQTSVRDPS[79.9663]PEADAPVLGSPEK	R	E	354	376	23	3	10S(79.9663)	sp|O15234|CASC3_HUMAN	O15234	CASC3_HUMAN	CASC3	Protein CASC3			2	354400	MS/MS	STY:79.9663@LEQT(0.0318)S(0.0318)VRDPS(0.9040)PEADAPVLGS(0.0324)PEK;
LESLSETPGPSSPR	LESLSETPGPS[79.9663]SPR	R	Q	1115	1128	14	2	11S(79.9663)	sp|Q12774|ARHG5_HUMAN	Q12774	ARHG5_HUMAN	ARHGEF5	Rho guanine nucleotide exchange factor 5			1	0	MS/MS	STY:79.9663@LES(0.0410)LS(0.0410)ET(0.0410)PGPS(0.4385)S(0.4385)PR;
LESLYSDEEDESAVGADK	LESLYS[79.9663]DEEDESAVGADK	R	I	962	979	18	2	6S(79.9663)	sp|Q9UP95|S12A4_HUMAN	Q9UP95	S12A4_HUMAN	SLC12A4	Solute carrier family 12 member 4			1	3.98331e+06	MS/MS	STY:79.9663@LES(0.0431)LY(0.0431)S(0.4569)DEEDES(0.4569)AVGADK;
LESLYSDEEDESAVGADK	LESLY[79.9663]SDEEDESAVGADK	R	I	962	979	18	2	5Y(79.9663)	sp|Q9UP95|S12A4_HUMAN	Q9UP95	S12A4_HUMAN	SLC12A4	Solute carrier family 12 member 4			2	3.98331e+06	MS/MS	STY:79.9663@LES(0.0109)LY(0.4425)S(0.4425)DEEDES(0.1040)AVGADK;
LESIDGNEEESMK	LES[79.9663]IDGNEEESMK	K	E	755	767	13	2	3S(79.9663)	sp|Q8TEQ6|GEMI5_HUMAN	Q8TEQ6	GEMI5_HUMAN	GEMIN5	Gem-associated protein 5			1	0	MS/MS	STY:79.9663@LES(0.5000)IDGNEEES(0.5000)MK;
LESLYSDEEDESAVGADK	LES[79.9663]LYSDEEDESAVGADK	R	I	962	979	18	2	3S(79.9663)	sp|Q9UP95|S12A4_HUMAN	Q9UP95	S12A4_HUMAN	SLC12A4	Solute carrier family 12 member 4			1	3.98331e+06	MS/MS	STY:79.9663@LES(0.3234)LY(0.3234)S(0.3234)DEEDES(0.0299)AVGADK;
LFDDSDER	LFDDS[79.9663]DER	K	G	717	724	8	2	5S(79.9663)	sp|O43719|HTSF1_HUMAN	O43719	HTSF1_HUMAN	HTATSF1	17S U2 SnRNP complex component HTATSF1			2	516836	MS/MS	STY:79.9663@LFDDS(1.0000)DER;
LFDEEEDSSEK	LFDEEEDSS[79.9663]EK	K	L	706	716	11	2	9S(79.9663)	sp|O43719|HTSF1_HUMAN	O43719	HTSF1_HUMAN	HTATSF1	17S U2 SnRNP complex component HTATSF1			1	2.64503e+06	MS/MS	STY:79.9663@LFDEEEDS(0.1086)S(0.8914)EK;
LFDEEEDSSEK	LFDEEEDS[79.9663]SEK	K	L	706	716	11	2	8S(79.9663)	sp|O43719|HTSF1_HUMAN	O43719	HTSF1_HUMAN	HTATSF1	17S U2 SnRNP complex component HTATSF1			8	4.18771e+06	MS/MS	STY:79.9663@LFDEEEDS(0.5000)S(0.5000)EK;
LFDEEEDSSEK	LFDEEEDS[79.9663]S[79.9663]EK	K	L	706	716	11	2	8S(79.9663),9S(79.9663)	sp|O43719|HTSF1_HUMAN	O43719	HTSF1_HUMAN	HTATSF1	17S U2 SnRNP complex component HTATSF1			2	1.65808e+06	MS/MS	STY:79.9663@LFDEEEDS(1.0000)S(1.0000)EK;
LFEDDDSNEK	LFEDDDS[79.9663]NEK	K	L	696	705	10	2	7S(79.9663)	sp|O43719|HTSF1_HUMAN	O43719	HTSF1_HUMAN	HTATSF1	17S U2 SnRNP complex component HTATSF1			8	1.0118103E7	MS/MS	STY:79.9663@LFEDDDS(1.0000)NEK;
LFEESDDKEDEDADGK	LFEES[79.9663]DDKEDEDADGK	K	E	672	687	16	2,3	5S(79.9663)	sp|O43719|HTSF1_HUMAN	O43719	HTSF1_HUMAN	HTATSF1	17S U2 SnRNP complex component HTATSF1			22	4625734	MS/MS	STY:79.9663@LFEES(1.0000)DDKEDEDADGK;
LFPDTPLALDANK	LFPDT[79.9663]PLALDANK	K	K	588	600	13	2	5T(79.9663)	sp|Q12906|ILF3_HUMAN	Q12906	ILF3_HUMAN	ILF3	Interleukin enhancer-binding factor 3			1	736860	MS/MS	STY:79.9663@LFPDT(1.0000)PLALDANK;
LFQLGPPSPVK	LFQLGPPS[79.9663]PVK	K	M	158	168	11	2	8S(79.9663)	sp|O95997|PTTG1_HUMAN	O95997	PTTG1_HUMAN	PTTG1	Securin	PTTG2	sp|Q9NZH5|PTTG2_HUMAN	3	691129	MS/MS	STY:79.9663@LFQLGPPS(1.0000)PVK;
LGAGEGGEASVSPEK	LGAGEGGEASVS[79.9663]PEK	K	T	1367	1381	15	2	12S(79.9663)	sp|Q13428|TCOF_HUMAN	Q13428	TCOF_HUMAN	TCOF1	Treacle protein			4	1.1426071E7	MS/MS	STY:79.9663@LGAGEGGEAS(0.0542)VS(0.9458)PEK;
LGAGEGGEASVSPEK	LGAGEGGEAS[79.9663]VSPEK	K	T	1367	1381	15	2	10S(79.9663)	sp|Q13428|TCOF_HUMAN	Q13428	TCOF_HUMAN	TCOF1	Treacle protein			9	1.327973E7	MS/MS	STY:79.9663@LGAGEGGEAS(0.5000)VS(0.5000)PEK;
LGAGGGSPEK	LGAGGGS[79.9663]PEK	R	S	13	22	10	2	7S(79.9663)	sp|Q9UNE7|CHIP_HUMAN	Q9UNE7	CHIP_HUMAN	STUB1	E3 ubiquitin-protein ligase CHIP			9	1.33169e+06	MS/MS	STY:79.9663@LGAGGGS(1.0000)PEK;
LGAPENSGISTLER	LGAPENSGIST[79.9663]LER	R	G	14	27	14	2	11T(79.9663)	sp|Q9Y4F1|FARP1_HUMAN	Q9Y4F1	FARP1_HUMAN	FARP1	FERM, ARHGEF and pleckstrin domain-containing protein 1			1	1.2809755E7	MS/MS	STY:79.9663@LGAPENS(0.0277)GIS(0.0277)T(0.9447)LER;
LGAPENSGISTLER	LGAPENSGIS[79.9663]TLER	R	G	14	27	14	2	10S(79.9663)	sp|Q9Y4F1|FARP1_HUMAN	Q9Y4F1	FARP1_HUMAN	FARP1	FERM, ARHGEF and pleckstrin domain-containing protein 1			5	1.9712084E7	MS/MS	STY:79.9663@LGAPENS(0.0168)GIS(0.4916)T(0.4916)LER;
LGAPENSGISTLER	LGAPENS[79.9663]GISTLER	R	G	14	27	14	2	7S(79.9663)	sp|Q9Y4F1|FARP1_HUMAN	Q9Y4F1	FARP1_HUMAN	FARP1	FERM, ARHGEF and pleckstrin domain-containing protein 1			4	1.9712084E7	MS/MS	STY:79.9663@LGAPENS(0.3333)GIS(0.3333)T(0.3333)LER;
LGASNSPGQPNSVK	LGASNSPGQPNS[79.9663]VK	K	R	672	685	14	2	12S(79.9663)	sp|P49756|RBM25_HUMAN	P49756	RBM25_HUMAN	RBM25	RNA-binding protein 25			5	1.2941892E7	MS/MS	STY:79.9663@LGAS(0.0278)NS(0.0300)PGQPNS(0.9422)VK;
LGASNSPGQPNSVK	LGASNS[79.9663]PGQPNSVK	K	R	672	685	14	2	6S(79.9663)	sp|P49756|RBM25_HUMAN	P49756	RBM25_HUMAN	RBM25	RNA-binding protein 25			3	1.2941892E7	MS/MS	STY:79.9663@LGAS(0.0313)NS(0.9412)PGQPNS(0.0275)VK;
LGASNSPGQPNSVK	LGAS[79.9663]NSPGQPNSVK	K	R	672	685	14	2	4S(79.9663)	sp|P49756|RBM25_HUMAN	P49756	RBM25_HUMAN	RBM25	RNA-binding protein 25			16	1.2764249E7	MS/MS	STY:79.9663@LGAS(0.9387)NS(0.0320)PGQPNS(0.0293)VK;
LGDASDTEAADGER	LGDAS[79.9663]DTEAADGER	R	G	1131	1144	14	2	5S(79.9663)	sp|Q9Y4F5|C170B_HUMAN	Q9Y4F5	C170B_HUMAN	CEP170B	Centrosomal protein of 170 kDa protein B			1	0	MS/MS	STY:79.9663@LGDAS(0.5000)DT(0.5000)EAADGER;
LGDVSPTQIDVSQFGSFK	LGDVS[79.9663]PTQIDVSQFGSFK	K	E	1497	1514	18	2	5S(79.9663)	sp|P46821|MAP1B_HUMAN	P46821	MAP1B_HUMAN	MAP1B	Microtubule-associated protein 1B			4	0	MS/MS	STY:79.9663@LGDVS(0.9306)PT(0.0185)QIDVS(0.0184)QFGS(0.0325)FK;
LGDVTDADSEADENEQVSAV	LGDVT[79.9663]DADSEADENEQVSAV	K	-	1582	1601	20	2	5T(79.9663)	sp|Q8TEU7|RPGF6_HUMAN	Q8TEU7	RPGF6_HUMAN	RAPGEF6	Rap guanine nucleotide exchange factor 6			1	0	MS/MS	STY:79.9663@LGDVT(0.3729)DADS(0.3729)EADENEQVS(0.2541)AV;
LGEASDSELADADK	LGEAS[79.9663]DSELADADK	R	A	1108	1121	14	2	5S(79.9663)	sp|Q5SW79|CE170_HUMAN	Q5SW79	CE170_HUMAN	CEP170	Centrosomal protein of 170 kDa			3	1.78321e+06	MS/MS	STY:79.9663@LGEAS(0.5000)DS(0.5000)ELADADK;
LGEEFEEITPGGHKTK	LGEEFEEIT[79.9663]PGGHKTK	K	S	67	82	16	2	9T(79.9663)	sp|A6NFH5|FBP12_HUMAN	A6NFH5	FBP12_HUMAN	FABP12	Fatty acid-binding protein 12			1	2394357	MS/MS	STY:79.9663@LGEEFEEIT(0.8060)PGGHKT(0.1940)K;
LGGLRPESPESLTSVSR	LGGLRPESPESLTS[79.9663]VSR	R	T	11	27	17	2	14S(79.9663)	sp|Q9H6F5|CCD86_HUMAN	Q9H6F5	CCD86_HUMAN	CCDC86	Coiled-coil domain-containing protein 86			1	2424070	MS/MS	STY:79.9663@LGGLRPES(0.0337)PES(0.0583)LT(0.0583)S(0.8314)VS(0.0183)R;
LGGLRPESPESLTSVSR	LGGLRPESPESLT[79.9663]SVSR	R	T	11	27	17	2	13T(79.9663)	sp|Q9H6F5|CCD86_HUMAN	Q9H6F5	CCD86_HUMAN	CCDC86	Coiled-coil domain-containing protein 86			1	3.87165e+06	MS/MS	STY:79.9663@LGGLRPES(0.0980)PES(0.1716)LT(0.2485)S(0.2485)VS(0.2335)R;
LGGLRPESPESLTSVSR	LGGLRPESPES[79.9663]LTSVSR	R	T	11	27	17	2	11S(79.9663)	sp|Q9H6F5|CCD86_HUMAN	Q9H6F5	CCD86_HUMAN	CCDC86	Coiled-coil domain-containing protein 86			2	3450639	MS/MS	STY:79.9663@LGGLRPES(0.0176)PES(0.9324)LT(0.0167)S(0.0167)VS(0.0167)R;
LGGLRPESPESLTSVSR	LGGLRPES[79.9663]PESLTSVSR	R	T	11	27	17	2	8S(79.9663)	sp|Q9H6F5|CCD86_HUMAN	Q9H6F5	CCD86_HUMAN	CCDC86	Coiled-coil domain-containing protein 86			11	4.85839e+06	MS/MS	STY:79.9663@LGGLRPES(0.9433)PES(0.0142)LT(0.0142)S(0.0142)VS(0.0142)R;
LGQMVLSGVDTVLGK	LGQMVLS[79.9663]GVDT[79.9663]VLGK	R	S	181	195	15	2	11T(79.9663),7S(79.9663)	sp|O60664|PLIN3_HUMAN	O60664	PLIN3_HUMAN	PLIN3	Perilipin-3			1	2.7015586E7	MS/MS	STY:79.9663@LGQMVLS(1.0000)GVDT(1.0000)VLGK;
LGSVLSPESPKPTPLTPLEPQK	LGSVLSPESPKPT[79.9663]PLTPLEPQK	K	P	137	158	22	3	13T(79.9663)	sp|Q96JM3|CHAP1_HUMAN	Q96JM3	CHAP1_HUMAN	CHAMP1	Chromosome alignment-maintaining phosphoprotein 1			1	368157	MS/MS	STY:79.9663@LGS(0.0265)VLS(0.0598)PES(0.0598)PKPT(0.8152)PLT(0.0387)PLEPQK;
LGSPSGK	LGS[79.9663]PSGK	R	T	557	563	7	2	3S(79.9663)	sp|Q09666|AHNK_HUMAN	Q09666	AHNK_HUMAN	AHNAK	Neuroblast differentiation-associated protein AHNAK			3	776894	MS/MS	STY:79.9663@LGS(0.5000)PS(0.5000)GK;
LGSVDSFER	LGS[79.9663]VDSFER	R	S	586	594	9	2	3S(79.9663)	sp|O60343|TBCD4_HUMAN	O60343	TBCD4_HUMAN	TBC1D4	TBC1 domain family member 4			1	596085	MS/MS	STY:79.9663@LGS(0.5000)VDS(0.5000)FER;
LGSVLSPESPKPTPLTPLEPQK	LGS[79.9663]VLSPESPKPTPLTPLEPQK	K	P	137	158	22	3	3S(79.9663)	sp|Q96JM3|CHAP1_HUMAN	Q96JM3	CHAP1_HUMAN	CHAMP1	Chromosome alignment-maintaining phosphoprotein 1			4	1.3179e+06	MS/MS	STY:79.9663@LGS(0.6777)VLS(0.0639)PES(0.0277)PKPT(0.0277)PLT(0.2030)PLEPQK;
LGVSVSPSR	LGVSVSPS[79.9663]R	K	A	529	537	9	2	8S(79.9663)	sp|Q86VM9|ZCH18_HUMAN	Q86VM9	ZCH18_HUMAN	ZC3H18	Zinc finger CCCH domain-containing protein 18			1	5.16188e+06	MS/MS	STY:79.9663@LGVS(0.0555)VS(0.0555)PS(0.8889)R;
LGVSVSPSR	LGVSVS[79.9663]PSR	K	A	529	537	9	2	6S(79.9663)	sp|Q86VM9|ZCH18_HUMAN	Q86VM9	ZCH18_HUMAN	ZC3H18	Zinc finger CCCH domain-containing protein 18			1	5.16188e+06	MS/MS	STY:79.9663@LGVS(0.0167)VS(0.4916)PS(0.4916)R;
LGVSVSPSR	LGVS[79.9663]VSPSR	K	A	529	537	9	2	4S(79.9663)	sp|Q86VM9|ZCH18_HUMAN	Q86VM9	ZCH18_HUMAN	ZC3H18	Zinc finger CCCH domain-containing protein 18			4	5.16188e+06	MS/MS	STY:79.9663@LGVS(0.3333)VS(0.3333)PS(0.3333)R;
LIDLESPTPESQK	LIDLES[79.9663]PTPESQK	K	S	1544	1556	13	2	6S(79.9663)	sp|O43166|SI1L1_HUMAN	O43166	SI1L1_HUMAN	SIPA1L1	Signal-induced proliferation-associated 1-like protein 1			2	0	MS/MS	STY:79.9663@LIDLES(0.4912)PT(0.4912)PES(0.0175)QK;
LIEDNEYTAR	LIEDNEYT[79.9663]AR	R	E	388	397	10	2	8T(79.9663)	sp|P06239|LCK_HUMAN	P06239	LCK_HUMAN	LCK	Tyrosine-protein kinase Lck	FYN, SRC, YES1	sp|P06241|FYN_HUMAN, sp|P07947|YES_HUMAN, sp|P12931|SRC_HUMAN	1	523387	MS/MS	STY:79.9663@LIEDNEY(0.0716)T(0.9284)AR;
LIEDNEYTAR	LIEDNEY[79.9663]TAR	R	E	388	397	10	2	7Y(79.9663)	sp|P06239|LCK_HUMAN	P06239	LCK_HUMAN	LCK	Tyrosine-protein kinase Lck	FYN, SRC, YES1	sp|P06241|FYN_HUMAN, sp|P07947|YES_HUMAN, sp|P12931|SRC_HUMAN	1	523387	MS/MS	STY:79.9663@LIEDNEY(0.5000)T(0.5000)AR;
LIIESPSNTSSTEPA	LIIESPS[79.9663]NTSSTEPA	R	-	562	576	15	2	7S(79.9663)	sp|P38432|COIL_HUMAN	P38432	COIL_HUMAN	COIL	Coilin			1	1.15092e+06	MS/MS	STY:79.9663@LIIES(0.0740)PS(0.1852)NT(0.1852)S(0.1852)S(0.1852)T(0.1852)EPA;
LKCGSGPVHISGQHLVAVEEDAESEDEEEEDVK	LKC[57.0215]GSGPVHISGQHLVAVEEDAES[79.9663]EDEEEEDVK	R	L	102	134	33	4	24S(79.9663),3C(57.0215)	sp|P06748|NPM_HUMAN	P06748	NPM_HUMAN	NPM1	Nucleophosmin			2	1.69016e+06	MS/MS	STY:79.9663@LKCGS(0.0675)GPVHIS(0.0675)GQHLVAVEEDAES(0.8649)EDEEEEDVK;
LKCGSGPVHISGQHLVAVEEDAESEDEEEEDVK	LKC[57.0215]GSGPVHIS[79.9663]GQHLVAVEEDAESEDEEEEDVK	R	L	102	134	33	4	11S(79.9663),3C(57.0215)	sp|P06748|NPM_HUMAN	P06748	NPM_HUMAN	NPM1	Nucleophosmin			1	1.69016e+06	MS/MS	STY:79.9663@LKCGS(0.0472)GPVHIS(0.4764)GQHLVAVEEDAES(0.4764)EDEEEEDVK;
LKCGSGPVHISGQHLVAVEEDAESEDEEEEDVK	LKC[57.0215]GS[79.9663]GPVHISGQHLVAVEEDAESEDEEEEDVK	R	L	102	134	33	4	3C(57.0215),5S(79.9663)	sp|P06748|NPM_HUMAN	P06748	NPM_HUMAN	NPM1	Nucleophosmin			1	1.69016e+06	MS/MS	STY:79.9663@LKCGS(0.4839)GPVHIS(0.4839)GQHLVAVEEDAES(0.0323)EDEEEEDVK;
LKSEDGVEGDLGETQSR	LKSEDGVEGDLGET[79.9663]QSR	R	T	133	149	17	2	14T(79.9663)	sp|Q09666|AHNK_HUMAN	Q09666	AHNK_HUMAN	AHNAK	Neuroblast differentiation-associated protein AHNAK			2	2.47348e+06	MS/MS	STY:79.9663@LKS(0.0299)EDGVEGDLGET(0.4851)QS(0.4851)R;
LKSEDGVEGDLGETQSR	LKS[79.9663]EDGVEGDLGETQSR	R	T	133	149	17	2	3S(79.9663)	sp|Q09666|AHNK_HUMAN	Q09666	AHNK_HUMAN	AHNAK	Neuroblast differentiation-associated protein AHNAK			19	2.51917e+06	MS/MS	STY:79.9663@LKS(0.9441)EDGVEGDLGET(0.0279)QS(0.0279)R;
LLDLSDSTSVASFPSADETDGNLPESR	LLDLSDSTSVAS[79.9663]FPSADETDGNLPESR	K	I	1094	1120	27	3	12S(79.9663)	sp|Q13464|ROCK1_HUMAN	Q13464	ROCK1_HUMAN	ROCK1	Rho-associated protein kinase 1			1	0	MS/MS	STY:79.9663@LLDLS(0.1843)DS(0.1843)T(0.1843)S(0.1843)VAS(0.2303)FPS(0.0033)ADET(0.0179)DGNLPES(0.0114)R;
LLEDGEDFNLGDALDSSNSMQTIQK	LLEDGEDFNLGDALDS[79.9663]SNSMQTIQK	R	T	383	407	25	3	16S(79.9663)	sp|P05783|K1C18_HUMAN	P05783	K1C18_HUMAN	KRT18	Keratin, type I cytoskeletal 18			3	5077958	MS/MS	STY:79.9663@LLEDGEDFNLGDALDS(0.4782)S(0.4782)NS(0.0238)MQT(0.0198)IQK;
LLEDGEDFNLGDALDSSNSMQTIQK	LLEDGEDFNLGDALDS[79.9663]SNSM[15.9949]QTIQK	R	T	383	407	25	3	16S(79.9663),20M(15.9949)	sp|P05783|K1C18_HUMAN	P05783	K1C18_HUMAN	KRT18	Keratin, type I cytoskeletal 18			1	2245117	MS/MS	STY:79.9663@LLEDGEDFNLGDALDS(0.4772)S(0.4772)NS(0.0261)MQT(0.0194)IQK;M:15.9949@LLEDGEDFNLGDALDSSNSM(1.0000)QTIQK;
LLEENETEAVTVPTPSPTPVR	LLEENET[79.9663]EAVTVPTPSPTPVR	K	S	399	419	21	3	7T(79.9663)	sp|Q9UHR4|BI2L1_HUMAN	Q9UHR4	BI2L1_HUMAN	BAIAP2L1	BAR/IMD domain-containing adapter protein 2-like 1			1	521906	MS/MS	STY:79.9663@LLEENET(0.6689)EAVT(0.0828)VPT(0.0828)PS(0.0828)PT(0.0828)PVR;
LLKPGEEPSEYTDEEDTK	LLKPGEEPSEYTDEEDT[79.9663]K	R	D	200	217	18	2,3	17T(79.9663)	sp|O15173|PGRC2_HUMAN	O15173	PGRC2_HUMAN	PGRMC2	Membrane-associated progesterone receptor component 2			7	1.881292E7	MS/MS	STY:79.9663@LLKPGEEPS(0.0219)EY(0.0219)T(0.0219)DEEDT(0.9343)K;
LLKPGEEPSEYTDEEDTK	LLKPGEEPSEYT[79.9663]DEEDTK	R	D	200	217	18	2,3	12T(79.9663)	sp|O15173|PGRC2_HUMAN	O15173	PGRC2_HUMAN	PGRMC2	Membrane-associated progesterone receptor component 2			10	1.951489E7	MS/MS	STY:79.9663@LLKPGEEPS(0.0186)EY(0.0188)T(0.9441)DEEDT(0.0185)K;
LLKPGEEPSEYTDEEDTK	LLKPGEEPSEY[79.9663]TDEEDTK	R	D	200	217	18	2,3	11Y(79.9663)	sp|O15173|PGRC2_HUMAN	O15173	PGRC2_HUMAN	PGRMC2	Membrane-associated progesterone receptor component 2			12	1.9002772E7	MS/MS	STY:79.9663@LLKPGEEPS(0.0199)EY(0.9356)T(0.0228)DEEDT(0.0217)K;
LLKPGEEPSEYTDEEDTK	LLKPGEEPS[79.9663]EYTDEEDTK	R	D	200	217	18	2,3	9S(79.9663)	sp|O15173|PGRC2_HUMAN	O15173	PGRC2_HUMAN	PGRMC2	Membrane-associated progesterone receptor component 2			37	1.9804988E7	MS/MS	STY:79.9663@LLKPGEEPS(0.9387)EY(0.0214)T(0.0214)DEEDT(0.0184)K;
LLLDPSSPPTK	LLLDPSSPPT[79.9663]K	K	A	21	31	11	2	10T(79.9663)	sp|Q6IAA8|LTOR1_HUMAN	Q6IAA8	LTOR1_HUMAN	LAMTOR1	Ragulator complex protein LAMTOR1			1	1.49345e+06	MS/MS	STY:79.9663@LLLDPS(0.3081)S(0.3081)PPT(0.3838)K;
LLLDPSSPPTK	LLLDPS[79.9663]SPPTK	K	A	21	31	11	2	6S(79.9663)	sp|Q6IAA8|LTOR1_HUMAN	Q6IAA8	LTOR1_HUMAN	LAMTOR1	Ragulator complex protein LAMTOR1			2	1.49345e+06	MS/MS	STY:79.9663@LLLDPS(0.8909)S(0.0822)PPT(0.0269)K;
LLPEGEETLESDDEK	LLPEGEETLES[79.9663]DDEK	R	D	148	162	15	2	11S(79.9663)	sp|Q8N6N3|CA052_HUMAN	Q8N6N3	CA052_HUMAN	C1orf52	UPF0690 protein C1orf52			3	1.7909708E7	MS/MS	STY:79.9663@LLPEGEET(0.0547)LES(0.9453)DDEK;
LLPEGEETLESDDEK	LLPEGEET[79.9663]LESDDEK	R	D	148	162	15	2	8T(79.9663)	sp|Q8N6N3|CA052_HUMAN	Q8N6N3	CA052_HUMAN	C1orf52	UPF0690 protein C1orf52			4	1.7909708E7	MS/MS	STY:79.9663@LLPEGEET(0.5000)LES(0.5000)DDEK;
[truncated: 2,003 more rows]

## Sheet: Fe-NTA_2_MSFragger
Peptide Sequence	Modified Sequence	Prev AA	Next AA	Start	End	Peptide Length	Charges	Assigned Modifications	Protein	Protein ID	Entry Name	Gene	Protein Description	Mapped Genes	Mapped Proteins	FeNTA_2 Spectral Count	FeNTA_2 Intensity	FeNTA_2 Match Type	FeNTA_2 Localization
[truncated: 3,559 more rows]

## Sheet: Fe-NTA_3_MSFragger
Peptide Sequence	Modified Sequence	Prev AA	Next AA	Start	End	Peptide Length	Charges	Assigned Modifications	Protein	Protein ID	Entry Name	Gene	Protein Description	Mapped Genes	Mapped Proteins	FeNTA_3 Spectral Count	FeNTA_3 Intensity	FeNTA_3 Match Type	FeNTA_3 Localization
[truncated: 4,108 more rows]

[truncated: 5 more sheets: Fe-NTA_1_PD, Fe-NTA_2_PD, Fe-NTA_3_PD, phosphoprotein, phosphosite]
