# Supplementary material for: Unlocking Ultrasensitive Phosphoproteomics of Nanoscale Samples: A Rapid IMAC Enrichment Platform Using Ti-PAN Tip
Source: Research Square preprint supplement (doi:10.21203/rs.3.rs-8623740/v1), 2026-01-28
Supplement: Supplementary file 8 [file 95f129c62c0bce4ff55d130c.xlsx]

## Sheet: 100cells_1_MSFragger
Peptide Sequence	Modified Sequence	Prev AA	Next AA	Start	End	Peptide Length	Charges	Assigned Modifications	Protein	Protein ID	Entry Name	Gene	Protein Description	Mapped Genes	Mapped Proteins	cell2_2 Spectral Count	cell2_2 Intensity	cell2_2 Match Type	cell2_2 Localization
AAAAAPASEDEDDEDDEDDEDDDDDEEDDSEEEAMETTPAK	AAAAAPASEDEDDEDDEDDEDDDDDEEDDSEEEAMET[79.9663]T[79.9663]PAK	K	G	177	217	41	4	37T(79.9663),38T(79.9663)	sp|P19338|NUCL_HUMAN	P19338	NUCL_HUMAN	NCL	Nucleolin			1	2.3798224E7	MS/MS	STY:79.9663@AAAAAPAS(0.1688)EDEDDEDDEDDEDDDDDEEDDS(0.4893)EEEAMET(0.6709)T(0.6709)PAK;
AAAAAPASEDEDDEDDEDDEDDDDDEEDDSEEEAMETTPAK	AAAAAPASEDEDDEDDEDDEDDDDDEEDDSEEEAM[15.9949]ET[79.9663]T[79.9663]PAK	K	G	177	217	41	5	35M(15.9949),37T(79.9663),38T(79.9663)	sp|P19338|NUCL_HUMAN	P19338	NUCL_HUMAN	NCL	Nucleolin			1	1.35794e+06	MS/MS	STY:79.9663@AAAAAPAS(0.1215)EDEDDEDDEDDEDDDDDEEDDS(0.2567)EEEAMET(0.8109)T(0.8109)PAK;M:15.9949@AAAAAPASEDEDDEDDEDDEDDDDDEEDDSEEEAM(1.0000)ETTPAK;
AAAAAPASEDEDDEDDEDDEDDDDDEEDDSEEEAMETTPAK	AAAAAPASEDEDDEDDEDDEDDDDDEEDDS[79.9663]EEEAM[15.9949]ET[79.9663]TPAK	K	G	177	217	41	4	30S(79.9663),35M(15.9949),37T(79.9663)	sp|P19338|NUCL_HUMAN	P19338	NUCL_HUMAN	NCL	Nucleolin			2	2.3566166E7	MS/MS	STY:79.9663@AAAAAPAS(0.6336)EDEDDEDDEDDEDDDDDEEDDS(0.6825)EEEAMET(0.6345)T(0.0494)PAK;M:15.9949@AAAAAPASEDEDDEDDEDDEDDDDDEEDDSEEEAM(1.0000)ETTPAK;
AAAAAPASEDEDDEDDEDDEDDDDDEEDDSEEEAMETTPAK	AAAAAPAS[79.9663]EDEDDEDDEDDEDDDDDEEDDSEEEAMETTPAK	K	G	177	217	41	4	8S(79.9663)	sp|P19338|NUCL_HUMAN	P19338	NUCL_HUMAN	NCL	Nucleolin			1	0	MS/MS	STY:79.9663@AAAAAPAS(0.8001)EDEDDEDDEDDEDDDDDEEDDS(0.1481)EEEAMET(0.0259)T(0.0259)PAK;
AAAAAPASEDEDDEDDEDDEDDDDDEEDDSEEEAMETTPAK	AAAAAPAS[79.9663]EDEDDEDDEDDEDDDDDEEDDSEEEAM[15.9949]ETTPAK	K	G	177	217	41	4	35M(15.9949),8S(79.9663)	sp|P19338|NUCL_HUMAN	P19338	NUCL_HUMAN	NCL	Nucleolin			1	821572	MS/MS	STY:79.9663@AAAAAPAS(0.2500)EDEDDEDDEDDEDDDDDEEDDS(0.2500)EEEAMET(0.2500)T(0.2500)PAK;M:15.9949@AAAAAPASEDEDDEDDEDDEDDDDDEEDDSEEEAM(1.0000)ETTPAK;
AAAAAPASEDEDDEDDEDDEDDDDDEEDDSEEEAMETTPAK	AAAAAPAS[79.9663]EDEDDEDDEDDEDDDDDEEDDSEEEAM[15.9949]ET[79.9663]TPAK	K	G	177	217	41	4	35M(15.9949),37T(79.9663),8S(79.9663)	sp|P19338|NUCL_HUMAN	P19338	NUCL_HUMAN	NCL	Nucleolin			2	2.3566166E7	MS/MS	STY:79.9663@AAAAAPAS(0.8017)EDEDDEDDEDDEDDDDDEEDDS(0.3561)EEEAMET(0.7941)T(0.0481)PAK;M:15.9949@AAAAAPASEDEDDEDDEDDEDDDDDEEDDSEEEAM(1.0000)ETTPAK;
AAAAAPASEDEDDEDDEDDEDDDDDEEDDSEEEAMETTPAK	AAAAAPAS[79.9663]EDEDDEDDEDDEDDDDDEEDDS[79.9663]EEEAMETTPAK	K	G	177	217	41	4	30S(79.9663),8S(79.9663)	sp|P19338|NUCL_HUMAN	P19338	NUCL_HUMAN	NCL	Nucleolin			2	2.3798224E7	MS/MS	STY:79.9663@AAAAAPAS(0.6524)EDEDDEDDEDDEDDDDDEEDDS(0.6524)EEEAMET(0.3476)T(0.3476)PAK;
AAAAAPASEDEDDEDDEDDEDDDDDEEDDSEEEAMETTPAK	AAAAAPAS[79.9663]EDEDDEDDEDDEDDDDDEEDDS[79.9663]EEEAM[15.9949]ETTPAK	K	G	177	217	41	4	30S(79.9663),35M(15.9949),8S(79.9663)	sp|P19338|NUCL_HUMAN	P19338	NUCL_HUMAN	NCL	Nucleolin			2	2.3566166E7	MS/MS	STY:79.9663@AAAAAPAS(0.9168)EDEDDEDDEDDEDDDDDEEDDS(0.9178)EEEAMET(0.0841)T(0.0813)PAK;M:15.9949@AAAAAPASEDEDDEDDEDDEDDDDDEEDDSEEEAM(1.0000)ETTPAK;
AADPPAENSSAPEAEQGGAE	AADPPAENS[79.9663]SAPEAEQGGAE	K	-	305	324	20	2	9S(79.9663)	sp|P67809|YBOX1_HUMAN	P67809	YBOX1_HUMAN	YBX1	Y-box-binding protein 1			3	5.87027e+06	MS/MS	STY:79.9663@AADPPAENS(0.5000)S(0.5000)APEAEQGGAE;
AADSQNSGEGNTGAAESSFSQEVSR	AADSQNSGEGNTGAAESSFSQEVS[79.9663]R	R	E	2031	2055	25	3	24S(79.9663)	sp|P12270|TPR_HUMAN	P12270	TPR_HUMAN	TPR	Nucleoprotein TPR			1	0	MS/MS	STY:79.9663@AADS(0.0317)QNS(0.0317)GEGNT(0.0317)GAAES(0.0317)S(0.0317)FS(0.0317)QEVS(0.8101)R;
AADSDDGAVSAPAASDGGVSK	AADS[79.9663]DDGAVSAPAASDGGVSK	M	S	2	22	21	2	4S(79.9663)	sp|Q96GM8|TOE1_HUMAN	Q96GM8	TOE1_HUMAN	TOE1	Target of EGR1 protein 1			2	0	MS/MS	STY:79.9663@AADS(0.4780)DDGAVS(0.4780)APAAS(0.0220)DGGVS(0.0220)K;
AAESETPGKSPEK	AAESETPGKS[79.9663]PEK	K	K	198	210	13	2	10S(79.9663)	sp|O76021-2|RL1D1_HUMAN	O76021-2	RL1D1_HUMAN	RSL1D1	Isoform 2 of Ribosomal L1 domain-containing protein 1		sp|O76021|RL1D1_HUMAN	1	1.44378e+06	MS/MS	STY:79.9663@AAES(0.0367)ET(0.0367)PGKS(0.9266)PEK;
AAESETPGKSPEK	AAES[79.9663]ETPGKSPEK	K	K	198	210	13	2	4S(79.9663)	sp|O76021-2|RL1D1_HUMAN	O76021-2	RL1D1_HUMAN	RSL1D1	Isoform 2 of Ribosomal L1 domain-containing protein 1		sp|O76021|RL1D1_HUMAN	3	1.1089148E7	MS/MS	STY:79.9663@AAES(0.3333)ET(0.3333)PGKS(0.3333)PEK;
AAESETPGKSPEK	AAES[79.9663]ET[79.9663]PGKSPEK	K	K	198	210	13	2	4S(79.9663),6T(79.9663)	sp|O76021-2|RL1D1_HUMAN	O76021-2	RL1D1_HUMAN	RSL1D1	Isoform 2 of Ribosomal L1 domain-containing protein 1		sp|O76021|RL1D1_HUMAN	1	0	MS/MS	STY:79.9663@AAES(0.6667)ET(0.6667)PGKS(0.6667)PEK;
AAFTTPDHAPLSPQSSVASSGSEQTEEQGSSR	AAFTTPDHAPLSPQS[79.9663]SVASSGSEQTEEQGSSR	R	N	260	291	32	3	15S(79.9663)	sp|Q5PRF9|SMAG2_HUMAN	Q5PRF9	SMAG2_HUMAN	SAMD4B	Protein Smaug homolog 2			1	1.87511e+06	MS/MS	STY:79.9663@AAFT(0.0044)T(0.0044)PDHAPLS(0.0064)PQS(0.2098)S(0.2098)VAS(0.0097)S(0.0097)GS(0.0097)EQT(0.2082)EEQGS(0.2082)S(0.1197)R;
AAGDSGEDSDDSDYENLIDPTEPSNSEYSHSK	AAGDSGEDSDDSDYENLIDPTEPSNSEY[79.9663]S[79.9663]HS[79.9663]K	R	D	364	395	32	3	28Y(79.9663),29S(79.9663),31S(79.9663)	sp|Q15018|ABRX2_HUMAN	Q15018	ABRX2_HUMAN	ABRAXAS2	BRISC complex subunit Abraxas 2			1	6723238	MS/MS	STY:79.9663@AAGDS(0.3261)GEDS(0.3261)DDS(0.3261)DY(0.3261)ENLIDPT(0.1855)EPS(0.1855)NS(0.1855)EY(0.3797)S(0.3797)HS(0.3797)K;
AAGDSGEDSDDSDYENLIDPTEPSNSEYSHSK	AAGDSGEDS[79.9663]DDS[79.9663]DY[79.9663]ENLIDPTEPSNSEYSHSK	R	D	364	395	32	3	12S(79.9663),14Y(79.9663),9S(79.9663)	sp|Q15018|ABRX2_HUMAN	Q15018	ABRX2_HUMAN	ABRAXAS2	BRISC complex subunit Abraxas 2			1	6723238	MS/MS	STY:79.9663@AAGDS(0.6034)GEDS(0.7207)DDS(0.7207)DY(0.6156)ENLIDPT(0.0423)EPS(0.0595)NS(0.0595)EY(0.0595)S(0.0595)HS(0.0595)K;
AAGDSGEDSDDSDYENLIDPTEPSNSEYSHSK	AAGDS[79.9663]GEDS[79.9663]DDS[79.9663]DYENLIDPTEPSNSEYSHSK	R	D	364	395	32	3	12S(79.9663),5S(79.9663),9S(79.9663)	sp|Q15018|ABRX2_HUMAN	Q15018	ABRX2_HUMAN	ABRAXAS2	BRISC complex subunit Abraxas 2			2	6.58218e+06	MS/MS	STY:79.9663@AAGDS(0.6749)GEDS(0.6749)DDS(0.6749)DY(0.6749)ENLIDPT(0.0256)EPS(0.0550)NS(0.0550)EY(0.0550)S(0.0550)HS(0.0550)K;
AAGGAPSPPPPVR	AAGGAPS[79.9663]PPPPVR	R	R	672	684	13	2	7S(79.9663)	sp|Q4KMP7|TB10B_HUMAN	Q4KMP7	TB10B_HUMAN	TBC1D10B	TBC1 domain family member 10B		sp|Q4KMP7-2|TB10B_HUMAN	2	1.82472e+06	MS/MS	STY:79.9663@AAGGAPS(1.0000)PPPPVR;
AAKNSEEEEEEK	AAKNS[79.9663]EEEEEEK	K	K	569	580	12	2	5S(79.9663)	sp|Q14978-2|NOLC1_HUMAN	Q14978-2	NOLC1_HUMAN	NOLC1	Isoform Beta of Nucleolar and coiled-body phosphoprotein 1		sp|Q14978-3|NOLC1_HUMAN, sp|Q14978|NOLC1_HUMAN	2	1.3256843E7	MS/MS	STY:79.9663@AAKNS(1.0000)EEEEEEK;
AAKNSEEEEEEKK	AAKNS[79.9663]EEEEEEKK	K	K	569	581	13	3	5S(79.9663)	sp|Q14978-2|NOLC1_HUMAN	Q14978-2	NOLC1_HUMAN	NOLC1	Isoform Beta of Nucleolar and coiled-body phosphoprotein 1		sp|Q14978-3|NOLC1_HUMAN, sp|Q14978|NOLC1_HUMAN	1	1.44493e+06	MS/MS	STY:79.9663@AAKNS(1.0000)EEEEEEKK;
AALLAQYADVTDEEDEADEK	AALLAQY[79.9663]ADVTDEEDEADEK	K	D	129	148	20	2	7Y(79.9663)	sp|Q96MW1|CCD43_HUMAN	Q96MW1	CCD43_HUMAN	CCDC43	Coiled-coil domain-containing protein 43			2	4275840	MS/MS	STY:79.9663@AALLAQY(0.5000)ADVT(0.5000)DEEDEADEK;
AAPEASSPPASPLQHLLPGK	AAPEAS[79.9663]SPPASPLQHLLPGK	K	A	673	692	20	3	6S(79.9663)	sp|Q96TA1-2|NIBA2_HUMAN	Q96TA1-2	NIBA2_HUMAN	NIBAN2	Isoform 2 of Protein Niban 2		sp|Q96TA1|NIBA2_HUMAN	1	1.96109e+06	MS/MS	STY:79.9663@AAPEAS(0.4287)S(0.4287)PPAS(0.1427)PLQHLLPGK;
AAPEASSPPASPLQHLLPGK	AAPEAS[79.9663]S[79.9663]PPASPLQHLLPGK	K	A	673	692	20	3	6S(79.9663),7S(79.9663)	sp|Q96TA1-2|NIBA2_HUMAN	Q96TA1-2	NIBA2_HUMAN	NIBAN2	Isoform 2 of Protein Niban 2		sp|Q96TA1|NIBA2_HUMAN	2	2.214919E7	MS/MS	STY:79.9663@AAPEAS(0.6667)S(0.6667)PPAS(0.6667)PLQHLLPGK;
AAPPPPPPPPPLESSPR	AAPPPPPPPPPLES[79.9663]SPR	K	V	606	622	17	3	14S(79.9663)	sp|Q5T4S7-2|UBR4_HUMAN	Q5T4S7-2	UBR4_HUMAN	UBR4	Isoform 2 of E3 ubiquitin-protein ligase UBR4		sp|Q5T4S7-3|UBR4_HUMAN, sp|Q5T4S7-4|UBR4_HUMAN, sp|Q5T4S7-5|UBR4_HUMAN, sp|Q5T4S7|UBR4_HUMAN	1	707489	MS/MS	STY:79.9663@AAPPPPPPPPPLES(0.5000)S(0.5000)PR;
AAQQDSDSDGEALGGNPMVAGFQDDVDLEDQPR	AAQQDS[79.9663]DS[79.9663]DGEALGGNPM[15.9949]VAGFQDDVDLEDQPR	K	G	421	453	33	3	18M(15.9949),6S(79.9663),8S(79.9663)	sp|Q3YEC7-2|RABL6_HUMAN	Q3YEC7-2	RABL6_HUMAN	RABL6	Isoform 2 of Rab-like protein 6		sp|Q3YEC7|RABL6_HUMAN	1	0	MS/MS	STY:79.9663@AAQQDS(1.0000)DS(1.0000)DGEALGGNPMVAGFQDDVDLEDQPR;M:15.9949@AAQQDSDSDGEALGGNPM(1.0000)VAGFQDDVDLEDQPR;
AASAPAKESPRK	AASAPAKES[79.9663]PRK	R	G	361	372	12	3	9S(79.9663)	sp|Q13428-2|TCOF_HUMAN	Q13428-2	TCOF_HUMAN	TCOF1	Isoform 2 of Treacle protein		sp|Q13428-3|TCOF_HUMAN, sp|Q13428-4|TCOF_HUMAN, sp|Q13428-5|TCOF_HUMAN, sp|Q13428-6|TCOF_HUMAN, sp|Q13428-7|TCOF_HUMAN, sp|Q13428-8|TCOF_HUMAN, sp|Q13428|TCOF_HUMAN	1	2339021	MS/MS	STY:79.9663@AAS(0.3258)APAKES(0.6742)PRK;
AASAPAKESPRK	AAS[79.9663]APAKESPRK	R	G	361	372	12	2	3S(79.9663)	sp|Q13428-2|TCOF_HUMAN	Q13428-2	TCOF_HUMAN	TCOF1	Isoform 2 of Treacle protein		sp|Q13428-3|TCOF_HUMAN, sp|Q13428-4|TCOF_HUMAN, sp|Q13428-5|TCOF_HUMAN, sp|Q13428-6|TCOF_HUMAN, sp|Q13428-7|TCOF_HUMAN, sp|Q13428-8|TCOF_HUMAN, sp|Q13428|TCOF_HUMAN	1	0	MS/MS	STY:79.9663@AAS(0.5000)APAKES(0.5000)PRK;
AASPPASASDLIEQQQK	AAS[79.9663]PPASASDLIEQQQK	R	R	333	349	17	2,3	3S(79.9663)	sp|Q5VSL9|STRP1_HUMAN	Q5VSL9	STRP1_HUMAN	STRIP1	Striatin-interacting protein 1		sp|Q5VSL9-2|STRP1_HUMAN, sp|Q5VSL9-3|STRP1_HUMAN	3	3.95533e+06	MS/MS	STY:79.9663@AAS(0.9364)PPAS(0.0318)AS(0.0318)DLIEQQQK;
AASPSPQSVR	AAS[79.9663]PSPQSVR	K	R	736	745	10	2	3S(79.9663)	sp|Q8IYB3|SRRM1_HUMAN	Q8IYB3	SRRM1_HUMAN	SRRM1	Serine/arginine repetitive matrix protein 1		sp|Q8IYB3-2|SRRM1_HUMAN	5	1.0285159E7	MS/MS	STY:79.9663@AAS(0.8628)PS(0.0686)PQS(0.0686)VR;
AASPSPQSVR	AAS[79.9663]PS[79.9663]PQSVR	K	R	736	745	10	2	3S(79.9663),5S(79.9663)	sp|Q8IYB3|SRRM1_HUMAN	Q8IYB3	SRRM1_HUMAN	SRRM1	Serine/arginine repetitive matrix protein 1		sp|Q8IYB3-2|SRRM1_HUMAN	4	1.4897774E7	MS/MS	STY:79.9663@AAS(0.6846)PS(0.6577)PQS(0.6577)VR;
AASPSPQSVR	AAS[79.9663]PS[79.9663]PQS[79.9663]VR	K	R	736	745	10	2	3S(79.9663),5S(79.9663),8S(79.9663)	sp|Q8IYB3|SRRM1_HUMAN	Q8IYB3	SRRM1_HUMAN	SRRM1	Serine/arginine repetitive matrix protein 1		sp|Q8IYB3-2|SRRM1_HUMAN	2	1706632	MS/MS	STY:79.9663@AAS(1.0000)PS(1.0000)PQS(1.0000)VR;
AASSSSPGSPVASSPSR	AAS[79.9663]S[79.9663]SSPGSPVASSPSR	R	L	1773	1789	17	2	3S(79.9663),4S(79.9663)	sp|Q92538-2|GBF1_HUMAN	Q92538-2	GBF1_HUMAN	GBF1	Isoform 2 of Golgi-specific brefeldin A-resistance guanine nucleotide exchange factor 1		sp|Q92538-3|GBF1_HUMAN, sp|Q92538|GBF1_HUMAN	1	0	MS/MS	STY:79.9663@AAS(0.3274)S(0.3274)S(0.3274)S(0.3274)PGS(0.3274)PVAS(0.3274)S(0.0217)PS(0.0138)R;
AAVLSDSEDEEK	AAVLS[79.9663]DSEDEEK	K	A	394	405	12	2	5S(79.9663)	sp|Q96ST2|IWS1_HUMAN	Q96ST2	IWS1_HUMAN	IWS1	Protein IWS1 homolog		sp|Q96ST2-2|IWS1_HUMAN, sp|Q96ST2-3|IWS1_HUMAN	3	0	MS/MS	STY:79.9663@AAVLS(0.5000)DS(0.5000)EDEEK;
AAVLSDSEDEEK	AAVLS[79.9663]DS[79.9663]EDEEK	K	A	394	405	12	2	5S(79.9663),7S(79.9663)	sp|Q96ST2|IWS1_HUMAN	Q96ST2	IWS1_HUMAN	IWS1	Protein IWS1 homolog		sp|Q96ST2-2|IWS1_HUMAN, sp|Q96ST2-3|IWS1_HUMAN	2	8107277	MS/MS	STY:79.9663@AAVLS(1.0000)DS(1.0000)EDEEK;
AAYGDLSSEEEEENEPESLGVVYK	AAYGDLS[79.9663]S[79.9663]EEEEENEPESLGVVYK	K	S	78	101	24	3	7S(79.9663),8S(79.9663)	sp|O15541|R113A_HUMAN	O15541	R113A_HUMAN	RNF113A	E3 ubiquitin-protein ligase RNF113A			1	8.12981e+06	MS/MS	STY:79.9663@AAY(0.0545)GDLS(0.4864)S(0.4864)EEEEENEPES(0.4864)LGVVY(0.4864)K;
ADAPDAGAQSDSELPSYHQNDVSLDR	ADAPDAGAQS[79.9663]DSELPSYHQNDVSLDR	R	G	1290	1315	26	3	10S(79.9663)	sp|Q92538-2|GBF1_HUMAN	Q92538-2	GBF1_HUMAN	GBF1	Isoform 2 of Golgi-specific brefeldin A-resistance guanine nucleotide exchange factor 1		sp|Q92538-3|GBF1_HUMAN, sp|Q92538|GBF1_HUMAN	2	9842152	MS/MS	STY:79.9663@ADAPDAGAQS(0.9357)DS(0.0176)ELPS(0.0157)Y(0.0157)HQNDVS(0.0153)LDR;
ADDFPVRDDPSDVTDEDEGPAEPPPPPK	ADDFPVRDDPS[79.9663]DVT[79.9663]DEDEGPAEPPPPPK	R	L	587	614	28	3	11S(79.9663),14T(79.9663)	sp|Q3YEC7-2|RABL6_HUMAN	Q3YEC7-2	RABL6_HUMAN	RABL6	Isoform 2 of Rab-like protein 6		sp|Q3YEC7|RABL6_HUMAN	4	4866549	MS/MS	STY:79.9663@ADDFPVRDDPS(1.0000)DVT(1.0000)DEDEGPAEPPPPPK;
ADEPSSEESDLEIDK	ADEPSS[79.9663]EESDLEIDK	K	E	71	85	15	2	6S(79.9663)	sp|P50502|F10A1_HUMAN	P50502	F10A1_HUMAN	ST13	Hsc70-interacting protein	ST13P4	sp|Q8IZP2|ST134_HUMAN	1	3565873	MS/MS	STY:79.9663@ADEPS(0.0988)S(0.6610)EES(0.2402)DLEIDK;
ADEPSSEESDLEIDK	ADEPSS[79.9663]EES[79.9663]DLEIDK	K	E	71	85	15	2	6S(79.9663),9S(79.9663)	sp|P50502|F10A1_HUMAN	P50502	F10A1_HUMAN	ST13	Hsc70-interacting protein	ST13P4	sp|Q8IZP2|ST134_HUMAN	2	6836865	MS/MS	STY:79.9663@ADEPS(0.3531)S(0.8242)EES(0.8227)DLEIDK;
ADEPSSEESDLEIDK	ADEPS[79.9663]SEESDLEIDK	K	E	71	85	15	2	5S(79.9663)	sp|P50502|F10A1_HUMAN	P50502	F10A1_HUMAN	ST13	Hsc70-interacting protein	ST13P4	sp|Q8IZP2|ST134_HUMAN	2	3565873	MS/MS	STY:79.9663@ADEPS(0.3333)S(0.3333)EES(0.3333)DLEIDK;
ADEPSSEESDLEIDK	ADEPS[79.9663]SEES[79.9663]DLEIDK	K	E	71	85	15	2	5S(79.9663),9S(79.9663)	sp|P50502|F10A1_HUMAN	P50502	F10A1_HUMAN	ST13	Hsc70-interacting protein	ST13P4	sp|Q8IZP2|ST134_HUMAN	2	5.4625516E7	MS/MS	STY:79.9663@ADEPS(0.8838)S(0.2318)EES(0.8844)DLEIDK;
ADEPSSEESDLEIDK	ADEPS[79.9663]S[79.9663]EESDLEIDK	K	E	71	85	15	2	5S(79.9663),6S(79.9663)	sp|P50502|F10A1_HUMAN	P50502	F10A1_HUMAN	ST13	Hsc70-interacting protein	ST13P4	sp|Q8IZP2|ST134_HUMAN	12	5.4625516E7	MS/MS	STY:79.9663@ADEPS(0.9392)S(0.9392)EES(0.1215)DLEIDK;
ADEPSSEESDLEIDK	ADEPS[79.9663]S[79.9663]EES[79.9663]DLEIDK	K	E	71	85	15	2	5S(79.9663),6S(79.9663),9S(79.9663)	sp|P50502|F10A1_HUMAN	P50502	F10A1_HUMAN	ST13	Hsc70-interacting protein	ST13P4	sp|Q8IZP2|ST134_HUMAN	111	5.9305677E8	MS/MS	STY:79.9663@ADEPS(1.0000)S(1.0000)EES(1.0000)DLEIDK;
ADSDSEDKGEESKPK	ADS[79.9663]DSEDKGEESKPK	K	K	87	101	15	3	3S(79.9663)	sp|P83916|CBX1_HUMAN	P83916	CBX1_HUMAN	CBX1	Chromobox protein homolog 1			1	448414	MS/MS	STY:79.9663@ADS(0.3333)DS(0.3333)EDKGEES(0.3333)KPK;
ADSRESLKPAAK	ADS[79.9663]RESLKPAAK	R	P	539	550	12	3	3S(79.9663)	sp|P46821|MAP1B_HUMAN	P46821	MAP1B_HUMAN	MAP1B	Microtubule-associated protein 1B			1	1.70387e+06	MS/MS	STY:79.9663@ADS(0.5000)RES(0.5000)LKPAAK;
ADVQLFMDDDSYSHHSGLEYADPEK	ADVQLFMDDDSYS[79.9663]HHS[79.9663]GLEY[79.9663]ADPEK	K	F	8	32	25	3	13S(79.9663),16S(79.9663),20Y(79.9663)	sp|P51636-3|CAV2_HUMAN	P51636-3	CAV2_HUMAN	CAV2	Isoform C of Caveolin-2		sp|P51636|CAV2_HUMAN	1	1.9143336E7	MS/MS	STY:79.9663@ADVQLFMDDDS(0.4384)Y(0.4384)S(0.7077)HHS(0.7077)GLEY(0.7077)ADPEK;
ADVQLFMDDDSYSHHSGLEYADPEK	ADVQLFMDDDS[79.9663]Y[79.9663]SHHSGLEYADPEK	K	F	8	32	25	3	11S(79.9663),12Y(79.9663)	sp|P51636-3|CAV2_HUMAN	P51636-3	CAV2_HUMAN	CAV2	Isoform C of Caveolin-2		sp|P51636|CAV2_HUMAN	4	1.273132E7	MS/MS	STY:79.9663@ADVQLFMDDDS(0.5784)Y(0.5784)S(0.2810)HHS(0.2810)GLEY(0.2810)ADPEK;
ADVQLFMDDDSYSHHSGLEYADPEK	ADVQLFM[15.9949]DDDS[79.9663]Y[79.9663]SHHSGLEYADPEK	K	F	8	32	25	3	11S(79.9663),12Y(79.9663),7M(15.9949)	sp|P51636-3|CAV2_HUMAN	P51636-3	CAV2_HUMAN	CAV2	Isoform C of Caveolin-2		sp|P51636|CAV2_HUMAN	1	3.29499e+06	MS/MS	STY:79.9663@ADVQLFMDDDS(0.4000)Y(0.4000)S(0.4000)HHS(0.4000)GLEY(0.4000)ADPEK;M:15.9949@ADVQLFM(1.0000)DDDSYSHHSGLEYADPEK;
AEAEAGSPRPDPR	AEAEAGS[79.9663]PRPDPR	R	E	2502	2514	13	2	7S(79.9663)	sp|P58107|EPIPL_HUMAN	P58107	EPIPL_HUMAN	EPPK1	Epiplakin			2	1.98102e+06	MS/MS	STY:79.9663@AEAEAGS(1.0000)PRPDPR;
AEAPLPSPK	AEAPLPS[79.9663]PK	K	L	5104	5112	9	2	7S(79.9663)	sp|Q09666|AHNK_HUMAN	Q09666	AHNK_HUMAN	AHNAK	Neuroblast differentiation-associated protein AHNAK			5	3.97606e+06	MS/MS	STY:79.9663@AEAPLPS(1.0000)PK;
AEDGATPSPSNETPKK	AEDGATPSPSNET[79.9663]PKK	K	K	138	153	16	2	13T(79.9663)	sp|P29966|MARCS_HUMAN	P29966	MARCS_HUMAN	MARCKS	Myristoylated alanine-rich C-kinase substrate			1	9519888	MS/MS	STY:79.9663@AEDGAT(0.0645)PS(0.1251)PS(0.1251)NET(0.6852)PKK;
AEDGATPSPSNETPK	AEDGATPSPS[79.9663]NETPK	K	K	138	152	15	2	10S(79.9663)	sp|P29966|MARCS_HUMAN	P29966	MARCS_HUMAN	MARCKS	Myristoylated alanine-rich C-kinase substrate			2	2.2455126E7	MS/MS	STY:79.9663@AEDGAT(0.0206)PS(0.0206)PS(0.9173)NET(0.0414)PK;
AEDGATPSPSNETPKK	AEDGATPSPS[79.9663]NETPKK	K	K	138	153	16	2	10S(79.9663)	sp|P29966|MARCS_HUMAN	P29966	MARCS_HUMAN	MARCKS	Myristoylated alanine-rich C-kinase substrate			2	8605886	MS/MS	STY:79.9663@AEDGAT(0.0156)PS(0.0212)PS(0.4816)NET(0.4816)PKK;
AEDGATPSPSNETPK	AEDGATPS[79.9663]PSNETPK	K	K	138	152	15	2	8S(79.9663)	sp|P29966|MARCS_HUMAN	P29966	MARCS_HUMAN	MARCKS	Myristoylated alanine-rich C-kinase substrate			2	3.7444748E7	MS/MS	STY:79.9663@AEDGAT(0.0175)PS(0.8356)PS(0.0998)NET(0.0471)PK;
AEDGATPSPSNETPKK	AEDGATPS[79.9663]PSNETPKK	K	K	138	153	16	2	8S(79.9663)	sp|P29966|MARCS_HUMAN	P29966	MARCS_HUMAN	MARCKS	Myristoylated alanine-rich C-kinase substrate			2	1.8125774E7	MS/MS	STY:79.9663@AEDGAT(0.0098)PS(0.3301)PS(0.3301)NET(0.3301)PKK;
AEDGATPSPSNETPK	AEDGAT[79.9663]PSPSNETPK	K	K	138	152	15	2	6T(79.9663)	sp|P29966|MARCS_HUMAN	P29966	MARCS_HUMAN	MARCKS	Myristoylated alanine-rich C-kinase substrate			2	3.7444748E7	MS/MS	STY:79.9663@AEDGAT(0.4007)PS(0.4007)PS(0.0993)NET(0.0993)PK;
AEDGATPSPSNETPKK	AEDGAT[79.9663]PSPSNETPKK	K	K	138	153	16	2	6T(79.9663)	sp|P29966|MARCS_HUMAN	P29966	MARCS_HUMAN	MARCKS	Myristoylated alanine-rich C-kinase substrate			3	1.8125774E7	MS/MS	STY:79.9663@AEDGAT(0.2500)PS(0.2500)PS(0.2500)NET(0.2500)PKK;
AEDGATPSPSNETPK	AEDGAT[79.9663]PS[79.9663]PSNETPK	K	K	138	152	15	2	6T(79.9663),8S(79.9663)	sp|P29966|MARCS_HUMAN	P29966	MARCS_HUMAN	MARCKS	Myristoylated alanine-rich C-kinase substrate			2	0	MS/MS	STY:79.9663@AEDGAT(0.5000)PS(0.5000)PS(0.5000)NET(0.5000)PK;
AEDSDSEPEPEDNVR	AEDS[79.9663]DS[79.9663]EPEPEDNVR	K	L	420	434	15	2	4S(79.9663),6S(79.9663)	sp|Q9H0D6-2|XRN2_HUMAN	Q9H0D6-2	XRN2_HUMAN	XRN2	Isoform 2 of 5'-3' exoribonuclease 2		sp|Q9H0D6|XRN2_HUMAN	3	9614709	MS/MS	STY:79.9663@AEDS(1.0000)DS(1.0000)EPEPEDNVR;
AEEDEILNRSPR	AEEDEILNRS[79.9663]PR	K	N	609	620	12	2	10S(79.9663)	sp|P27824-2|CALX_HUMAN	P27824-2	CALX_HUMAN	CANX	Isoform 2 of Calnexin		sp|P27824-3|CALX_HUMAN, sp|P27824|CALX_HUMAN	12	2.86370048E8	MS/MS	STY:79.9663@AEEDEILNRS(1.0000)PR;
AEEKSPISINVK	AEEKS[79.9663]PISINVK	K	T	348	359	12	2	5S(79.9663)	sp|Q9UK58-6|CCNL1_HUMAN	Q9UK58-6	CCNL1_HUMAN	CCNL1	Isoform 4 of Cyclin-L1		sp|Q9UK58|CCNL1_HUMAN	1	853693	MS/MS	STY:79.9663@AEEKS(0.5000)PIS(0.5000)INVK;
AEENTDQASPQEDYAGFER	AEENTDQAS[79.9663]PQEDYAGFER	K	L	4530	4548	19	3	9S(79.9663)	sp|Q9NU22|MDN1_HUMAN	Q9NU22	MDN1_HUMAN	MDN1	Midasin			1	608028	MS/MS	STY:79.9663@AEENT(0.2588)DQAS(0.6164)PQEDY(0.1247)AGFER;
AEEPPSQLDQDTQVQDMDEGSDDEEEGQK	AEEPPSQLDQDTQVQDMDEGS[79.9663]DDEEEGQK	K	V	339	367	29	3	21S(79.9663)	sp|Q15459|SF3A1_HUMAN	Q15459	SF3A1_HUMAN	SF3A1	Splicing factor 3A subunit 1		sp|Q15459-2|SF3A1_HUMAN	6	5.8872244E7	MS/MS	STY:79.9663@AEEPPS(0.0659)QLDQDT(0.0659)QVQDMDEGS(0.8682)DDEEEGQK;
AEEPPSQLDQDTQVQDMDEGSDDEEEGQK	AEEPPSQLDQDTQVQDM[15.9949]DEGS[79.9663]DDEEEGQK	K	V	339	367	29	3	17M(15.9949),21S(79.9663)	sp|Q15459|SF3A1_HUMAN	Q15459	SF3A1_HUMAN	SF3A1	Splicing factor 3A subunit 1		sp|Q15459-2|SF3A1_HUMAN	3	2.6555568E7	MS/MS	STY:79.9663@AEEPPS(0.1265)QLDQDT(0.0700)QVQDMDEGS(0.8035)DDEEEGQK;M:15.9949@AEEPPSQLDQDTQVQDM(1.0000)DEGSDDEEEGQK;
AEEPPSQLDQDTQVQDMDEGSDDEEEGQK	AEEPPSQLDQDT[79.9663]QVQDMDEGSDDEEEGQK	K	V	339	367	29	3	12T(79.9663)	sp|Q15459|SF3A1_HUMAN	Q15459	SF3A1_HUMAN	SF3A1	Splicing factor 3A subunit 1		sp|Q15459-2|SF3A1_HUMAN	6	5.8777744E7	MS/MS	STY:79.9663@AEEPPS(0.0533)QLDQDT(0.4734)QVQDMDEGS(0.4734)DDEEEGQK;
AEEPPSQLDQDTQVQDMDEGSDDEEEGQK	AEEPPSQLDQDT[79.9663]QVQDM[15.9949]DEGSDDEEEGQK	K	V	339	367	29	3	12T(79.9663),17M(15.9949)	sp|Q15459|SF3A1_HUMAN	Q15459	SF3A1_HUMAN	SF3A1	Splicing factor 3A subunit 1		sp|Q15459-2|SF3A1_HUMAN	1	2.6555568E7	MS/MS	STY:79.9663@AEEPPS(0.2320)QLDQDT(0.3840)QVQDMDEGS(0.3840)DDEEEGQK;M:15.9949@AEEPPSQLDQDTQVQDM(1.0000)DEGSDDEEEGQK;
AEEPPSQLDQDTQVQDMDEGSDDEEEGQK	AEEPPS[79.9663]QLDQDTQVQDMDEGSDDEEEGQK	K	V	339	367	29	3	6S(79.9663)	sp|Q15459|SF3A1_HUMAN	Q15459	SF3A1_HUMAN	SF3A1	Splicing factor 3A subunit 1		sp|Q15459-2|SF3A1_HUMAN	1	0	MS/MS	STY:79.9663@AEEPPS(0.3333)QLDQDT(0.3333)QVQDMDEGS(0.3333)DDEEEGQK;
AEEPPSQLDQDTQVQDMDEGSDDEEEGQK	AEEPPS[79.9663]QLDQDTQVQDM[15.9949]DEGSDDEEEGQK	K	V	339	367	29	3	17M(15.9949),6S(79.9663)	sp|Q15459|SF3A1_HUMAN	Q15459	SF3A1_HUMAN	SF3A1	Splicing factor 3A subunit 1		sp|Q15459-2|SF3A1_HUMAN	2	2.6555568E7	MS/MS	STY:79.9663@AEEPPS(0.4455)QLDQDT(0.4455)QVQDMDEGS(0.1090)DDEEEGQK;M:15.9949@AEEPPSQLDQDTQVQDM(1.0000)DEGSDDEEEGQK;
AEGEPQEESPLK	AEGEPQEES[79.9663]PLK	K	S	167	178	12	2	9S(79.9663)	sp|Q9NYF8-2|BCLF1_HUMAN	Q9NYF8-2	BCLF1_HUMAN	BCLAF1	Isoform 2 of Bcl-2-associated transcription factor 1		sp|Q9NYF8-3|BCLF1_HUMAN, sp|Q9NYF8-4|BCLF1_HUMAN, sp|Q9NYF8|BCLF1_HUMAN	4	4.58152e+06	MS/MS	STY:79.9663@AEGEPQEES(1.0000)PLK;
AEGEWEDQEALDYFSDK	AEGEWEDQEALDY[79.9663]FSDK	R	E	369	385	17	2	13Y(79.9663)	sp|Q9NYF8-2|BCLF1_HUMAN	Q9NYF8-2	BCLF1_HUMAN	BCLAF1	Isoform 2 of Bcl-2-associated transcription factor 1		sp|Q9NYF8-3|BCLF1_HUMAN, sp|Q9NYF8|BCLF1_HUMAN	1	8256242	MS/MS	STY:79.9663@AEGEWEDQEALDY(0.8591)FS(0.1409)DK;
AEQGSEEEGEGEEEEEEGGESK	AEQGS[79.9663]EEEGEGEEEEEEGGESK	K	A	224	245	22	2	5S(79.9663)	sp|Q8NE71|ABCF1_HUMAN	Q8NE71	ABCF1_HUMAN	ABCF1	ATP-binding cassette sub-family F member 1			1	3.91458e+06	MS/MS	STY:79.9663@AEQGS(0.9168)EEEGEGEEEEEEGGES(0.0832)K;
AESPESSAIESTQSTPQK	AESPES[79.9663]SAIESTQSTPQK	R	G	1356	1373	18	2	6S(79.9663)	sp|Q9NTI5|PDS5B_HUMAN	Q9NTI5	PDS5B_HUMAN	PDS5B	Sister chromatid cohesion protein PDS5 homolog B		sp|Q9NTI5-2|PDS5B_HUMAN	1	8.06152e+06	MS/MS	STY:79.9663@AES(0.0113)PES(0.3210)S(0.3210)AIES(0.3210)T(0.0085)QS(0.0085)T(0.0085)PQK;
AESSSGGGTVPSSAGILEQGPSPGDGSPPKPK	AESSSGGGTVPSSAGILEQGPSPGDGS[79.9663]PPKPK	R	D	276	307	32	3	27S(79.9663)	sp|Q68EM7-3|RHG17_HUMAN	Q68EM7-3	RHG17_HUMAN	ARHGAP17	Isoform 3 of Rho GTPase-activating protein 17		sp|Q68EM7-5|RHG17_HUMAN, sp|Q68EM7-6|RHG17_HUMAN, sp|Q68EM7-7|RHG17_HUMAN, sp|Q68EM7|RHG17_HUMAN	1	7236201	MS/MS	STY:79.9663@AES(0.0232)S(0.0303)S(0.0303)GGGT(0.0303)VPS(0.0205)S(0.0205)AGILEQGPS(0.0205)PGDGS(0.8244)PPKPK;
AESSSGGGTVPSSAGILEQGPSPGDGSPPKPK	AESSSGGGTVPSSAGILEQGPS[79.9663]PGDGSPPKPK	R	D	276	307	32	3	22S(79.9663)	sp|Q68EM7-3|RHG17_HUMAN	Q68EM7-3	RHG17_HUMAN	ARHGAP17	Isoform 3 of Rho GTPase-activating protein 17		sp|Q68EM7-5|RHG17_HUMAN, sp|Q68EM7-6|RHG17_HUMAN, sp|Q68EM7-7|RHG17_HUMAN, sp|Q68EM7|RHG17_HUMAN	1	7236201	MS/MS	STY:79.9663@AES(0.0136)S(0.0136)S(0.0171)GGGT(0.0433)VPS(0.0433)S(0.0433)AGILEQGPS(0.7946)PGDGS(0.0313)PPKPK;
AESISSDEEVHESVDSDNQQNK	AES[79.9663]IS[79.9663]SDEEVHESVDS[79.9663]DNQQNK	R	K	43	64	22	3	16S(79.9663),3S(79.9663),5S(79.9663)	sp|Q9UKY1|ZHX1_HUMAN	Q9UKY1	ZHX1_HUMAN	ZHX1	Zinc fingers and homeoboxes protein 1			1	1.05899e+06	MS/MS	STY:79.9663@AES(0.6881)IS(0.6881)S(0.6881)DEEVHES(0.2120)VDS(0.7236)DNQQNK;
AESPESSAIESTQSTPQK	AES[79.9663]PESSAIESTQSTPQK	R	G	1356	1373	18	2,3	3S(79.9663)	sp|Q9NTI5|PDS5B_HUMAN	Q9NTI5	PDS5B_HUMAN	PDS5B	Sister chromatid cohesion protein PDS5 homolog B		sp|Q9NTI5-2|PDS5B_HUMAN	3	1.0193168E7	MS/MS	STY:79.9663@AES(0.7356)PES(0.0112)S(0.0096)AIES(0.0096)T(0.0096)QS(0.1123)T(0.1123)PQK;
AESPESSAIESTQSTPQK	AES[79.9663]PES[79.9663]SAIESTQSTPQK	R	G	1356	1373	18	2	3S(79.9663),6S(79.9663)	sp|Q9NTI5|PDS5B_HUMAN	Q9NTI5	PDS5B_HUMAN	PDS5B	Sister chromatid cohesion protein PDS5 homolog B		sp|Q9NTI5-2|PDS5B_HUMAN	1	1.10335e+06	MS/MS	STY:79.9663@AES(0.2857)PES(0.2857)S(0.2857)AIES(0.2857)T(0.2857)QS(0.2857)T(0.2857)PQK;
AESSSGGGTVPSSAGILEQGPSPGDGSPPKPK	AES[79.9663]SSGGGTVPSSAGILEQGPSPGDGSPPKPK	R	D	276	307	32	3	3S(79.9663)	sp|Q68EM7-3|RHG17_HUMAN	Q68EM7-3	RHG17_HUMAN	ARHGAP17	Isoform 3 of Rho GTPase-activating protein 17		sp|Q68EM7-5|RHG17_HUMAN, sp|Q68EM7-6|RHG17_HUMAN, sp|Q68EM7-7|RHG17_HUMAN, sp|Q68EM7|RHG17_HUMAN	1	5403187	MS/MS	STY:79.9663@AES(0.6151)S(0.0112)S(0.0112)GGGT(0.0099)VPS(0.0099)S(0.0099)AGILEQGPS(0.1665)PGDGS(0.1665)PPKPK;
AETSEGSGSAPAVPEASASPK	AETSEGSGSAPAVPEAS[79.9663]ASPK	K	Q	74	94	21	2	17S(79.9663)	sp|P51608-2|MECP2_HUMAN	P51608-2	MECP2_HUMAN	MECP2	Isoform B of Methyl-CpG-binding protein 2		sp|P51608|MECP2_HUMAN	1	0	MS/MS	STY:79.9663@AET(0.0171)S(0.0171)EGS(0.0171)GS(0.0171)APAVPEAS(0.4658)AS(0.4658)PK;
AFGPGLQGGSAGSPAR	AFGPGLQGGSAGS[79.9663]PAR	K	F	1072	1087	16	2	13S(79.9663)	sp|P21333-2|FLNA_HUMAN	P21333-2	FLNA_HUMAN	FLNA	Isoform 2 of Filamin-A		sp|P21333|FLNA_HUMAN	1	3767894	MS/MS	STY:79.9663@AFGPGLQGGS(0.2059)AGS(0.7941)PAR;
AFGPGLQGGSAGSPAR	AFGPGLQGGS[79.9663]AGSPAR	K	F	1072	1087	16	2	10S(79.9663)	sp|P21333-2|FLNA_HUMAN	P21333-2	FLNA_HUMAN	FLNA	Isoform 2 of Filamin-A		sp|P21333|FLNA_HUMAN	3	1.0279544E7	MS/MS	STY:79.9663@AFGPGLQGGS(0.5533)AGS(0.4467)PAR;
AFVEDSEDEDGAGEGGSSLLQK	AFVEDS[79.9663]EDEDGAGEGGSSLLQK	R	R	166	187	22	3	6S(79.9663)	sp|Q8N9T8|KRI1_HUMAN	Q8N9T8	KRI1_HUMAN	KRI1	Protein KRI1 homolog			1	1.40972e+06	MS/MS	STY:79.9663@AFVEDS(0.9305)EDEDGAGEGGS(0.0347)S(0.0347)LLQK;
AGDLLEDSPK	AGDLLEDS[79.9663]PK	R	R	151	160	10	2	8S(79.9663)	sp|P51858-2|HDGF_HUMAN	P51858-2	HDGF_HUMAN	HDGF	Isoform 2 of Hepatoma-derived growth factor		sp|P51858-3|HDGF_HUMAN, sp|P51858|HDGF_HUMAN	13	7.0391968E7	MS/MS	STY:79.9663@AGDLLEDS(1.0000)PK;
AGDLLEDSPKRPK	AGDLLEDS[79.9663]PKRPK	R	E	151	163	13	3	8S(79.9663)	sp|P51858-2|HDGF_HUMAN	P51858-2	HDGF_HUMAN	HDGF	Isoform 2 of Hepatoma-derived growth factor		sp|P51858-3|HDGF_HUMAN, sp|P51858|HDGF_HUMAN	1	5702775	MS/MS	STY:79.9663@AGDLLEDS(1.0000)PKRPK;
AGEPDGESLDEQPSSSSSK	AGEPDGES[79.9663]LDEQPSSSSSK	K	R	57	75	19	2	8S(79.9663)	sp|Q9H3Q1|BORG4_HUMAN	Q9H3Q1	BORG4_HUMAN	CDC42EP4	Cdc42 effector protein 4			2	0	MS/MS	STY:79.9663@AGEPDGES(0.7382)LDEQPS(0.0524)S(0.0524)S(0.0524)S(0.0524)S(0.0524)K;
AGEPNSPDAEEANSPDVTAGCDPAGVHPPR	AGEPNS[79.9663]PDAEEANS[79.9663]PDVTAGC[57.0215]DPAGVHPPR	R	-	703	732	30	3	14S(79.9663),21C(57.0215),6S(79.9663)	sp|Q08J23-2|NSUN2_HUMAN	Q08J23-2	NSUN2_HUMAN	NSUN2	Isoform 2 of RNA cytosine C(5)-methyltransferase NSUN2		sp|Q08J23-3|NSUN2_HUMAN, sp|Q08J23|NSUN2_HUMAN	1	2669966	MS/MS	STY:79.9663@AGEPNS(0.6667)PDAEEANS(0.6667)PDVT(0.6667)AGCDPAGVHPPR;
AGEQQLSEPEDMEMEAGDTDDPPR	AGEQQLSEPEDM[15.9949]EMEAGDT[79.9663]DDPPR	K	I	12	35	24	3	12M(15.9949),19T(79.9663)	sp|Q93009|UBP7_HUMAN	Q93009	UBP7_HUMAN	USP7	Ubiquitin carboxyl-terminal hydrolase 7			1	1.13934e+06	MS/MS	STY:79.9663@AGEQQLS(0.1549)EPEDMEMEAGDT(0.8451)DDPPR;M:15.9949@AGEQQLSEPEDM(0.7801)EM(0.2199)EAGDTDDPPR;
AGEQQLSEPEDMEMEAGDTDDPPR	AGEQQLS[79.9663]EPEDMEMEAGDTDDPPR	K	I	12	35	24	3	7S(79.9663)	sp|Q93009|UBP7_HUMAN	Q93009	UBP7_HUMAN	USP7	Ubiquitin carboxyl-terminal hydrolase 7			3	2.66969e+06	MS/MS	STY:79.9663@AGEQQLS(0.9161)EPEDMEMEAGDT(0.0839)DDPPR;
AGEQQLSEPEDMEMEAGDTDDPPR	AGEQQLS[79.9663]EPEDM[15.9949]EMEAGDTDDPPR	K	I	12	35	24	3	12M(15.9949),7S(79.9663)	sp|Q93009|UBP7_HUMAN	Q93009	UBP7_HUMAN	USP7	Ubiquitin carboxyl-terminal hydrolase 7			1	1.13934e+06	MS/MS	STY:79.9663@AGEQQLS(0.8148)EPEDMEMEAGDT(0.1852)DDPPR;M:15.9949@AGEQQLSEPEDM(0.5000)EM(0.5000)EAGDTDDPPR;
AGGASPAASSTAQPPTQHR	AGGAS[79.9663]PAASSTAQPPTQHR	R	L	449	467	19	2	5S(79.9663)	sp|Q8IU81|I2BP1_HUMAN	Q8IU81	I2BP1_HUMAN	IRF2BP1	Interferon regulatory factor 2-binding protein 1			1	0	MS/MS	STY:79.9663@AGGAS(0.2371)PAAS(0.2371)S(0.2371)T(0.2371)AQPPT(0.0518)QHR;
AGGPTTPLSPTR	AGGPTTPLSPT[79.9663]R	R	L	15	26	12	2	11T(79.9663)	sp|P20700|LMNB1_HUMAN	P20700	LMNB1_HUMAN	LMNB1	Lamin-B1			1	1.7578e+06	MS/MS	STY:79.9663@AGGPT(0.1891)T(0.1891)PLS(0.1891)PT(0.4328)R;
AGGPTTPLSPTR	AGGPT[79.9663]T[79.9663]PLSPTR	R	L	15	26	12	2	5T(79.9663),6T(79.9663)	sp|P20700|LMNB1_HUMAN	P20700	LMNB1_HUMAN	LMNB1	Lamin-B1			2	0	MS/MS	STY:79.9663@AGGPT(0.8171)T(0.8171)PLS(0.1829)PT(0.1829)R;
AGGSAALSPSK	AGGSAALS[79.9663]PSK	K	K	24	34	11	2	8S(79.9663)	sp|Q92522|H1X_HUMAN	Q92522	H1X_HUMAN	H1-10	Histone H1.10			1	0	MS/MS	STY:79.9663@AGGS(0.0544)AALS(0.8421)PS(0.1034)K;
AGGSAALSPSK	AGGS[79.9663]AALSPSK	K	K	24	34	11	2	4S(79.9663)	sp|Q92522|H1X_HUMAN	Q92522	H1X_HUMAN	H1-10	Histone H1.10			5	1.536895E7	MS/MS	STY:79.9663@AGGS(0.3333)AALS(0.3333)PS(0.3333)K;
AGGSAALSPSKK	AGGS[79.9663]AALSPSKK	K	R	24	35	12	2	4S(79.9663)	sp|Q92522|H1X_HUMAN	Q92522	H1X_HUMAN	H1-10	Histone H1.10			1	0	MS/MS	STY:79.9663@AGGS(0.3333)AALS(0.3333)PS(0.3333)KK;
AGLESGAEPGDGDSDTTK	AGLESGAEPGDGDS[79.9663]DTTK	K	K	481	498	18	2	14S(79.9663)	sp|O60832|DKC1_HUMAN	O60832	DKC1_HUMAN	DKC1	H/ACA ribonucleoprotein complex subunit DKC1			3	2.2631282E7	MS/MS	STY:79.9663@AGLES(0.0087)GAEPGDGDS(0.3304)DT(0.3304)T(0.3304)K;
AGLESGAEPGDGDSDTTK	AGLES[79.9663]GAEPGDGDSDTTK	K	K	481	498	18	2	5S(79.9663)	sp|O60832|DKC1_HUMAN	O60832	DKC1_HUMAN	DKC1	H/ACA ribonucleoprotein complex subunit DKC1			2	2.206962E7	MS/MS	STY:79.9663@AGLES(0.9218)GAEPGDGDS(0.0261)DT(0.0261)T(0.0261)K;
AGLESGAEPGDGDSDTTK	AGLES[79.9663]GAEPGDGDS[79.9663]DTTK	K	K	481	498	18	2	14S(79.9663),5S(79.9663)	sp|O60832|DKC1_HUMAN	O60832	DKC1_HUMAN	DKC1	H/ACA ribonucleoprotein complex subunit DKC1			1	0	MS/MS	STY:79.9663@AGLES(0.5000)GAEPGDGDS(0.5000)DT(0.5000)T(0.5000)K;
AGSNEDPILAPSGTPPPTIPPDETFGGR	AGSNEDPILAPS[79.9663]GTPPPTIPPDETFGGR	R	V	732	759	28	3	12S(79.9663)	sp|Q8IZL8|PELP1_HUMAN	Q8IZL8	PELP1_HUMAN	PELP1	Proline-, glutamic acid- and leucine-rich protein 1			1	3.63663e+06	MS/MS	STY:79.9663@AGS(0.0080)NEDPILAPS(0.3242)GT(0.3242)PPPT(0.3242)IPPDET(0.0195)FGGR;
AIHSSDEDEDEDDEEDFEDDDEWED	AIHS[79.9663]S[79.9663]DEDEDEDDEEDFEDDDEWED	K	-	481	505	25	3	4S(79.9663),5S(79.9663)	sp|O00401|WASL_HUMAN	O00401	WASL_HUMAN	WASL	Actin nucleation-promoting factor WASL			1	1.0710776E7	MS/MS	STY:79.9663@AIHS(1.0000)S(1.0000)DEDEDEDDEEDFEDDDEWED;
AIPVSPSAVEEDEDEDGHTVVATAR	AIPVS[79.9663]PSAVEEDEDEDGHTVVATAR	K	G	1533	1557	25	3	5S(79.9663)	sp|Q07157-2|ZO1_HUMAN	Q07157-2	ZO1_HUMAN	TJP1	Isoform Short of Tight junction protein ZO-1		sp|Q07157|ZO1_HUMAN	1	1.23848e+06	MS/MS	STY:79.9663@AIPVS(0.2500)PS(0.2500)AVEEDEDEDGHT(0.2500)VVAT(0.2500)AR;
AISSANLLVR	AIS[79.9663]SANLLVR	K	S	174	183	10	2	3S(79.9663)	sp|Q32P44-2|EMAL3_HUMAN	Q32P44-2	EMAL3_HUMAN	EML3	Isoform 2 of Echinoderm microtubule-associated protein-like 3		sp|Q32P44|EMAL3_HUMAN	1	688983	MS/MS	STY:79.9663@AIS(0.5000)S(0.5000)ANLLVR;
AITSLLGGGSPK	AIT[79.9663]SLLGGGSPK	K	N	2649	2660	12	2	3T(79.9663)	sp|Q6KC79-2|NIPBL_HUMAN	Q6KC79-2	NIPBL_HUMAN	NIPBL	Isoform 2 of Nipped-B-like protein		sp|Q6KC79|NIPBL_HUMAN	2	2532997	MS/MS	STY:79.9663@AIT(0.3664)S(0.3664)LLGGGS(0.2673)PK;
AKSPQPPVEEEDEHFDDTVVCLDTYNCDLHFK	AKSPQPPVEEEDEHFDDTVVC[57.0215]LDT[79.9663]YNC[57.0215]DLHFK	R	I	269	300	32	4	21C(57.0215),24T(79.9663),27C(57.0215)	sp|Q00839|HNRPU_HUMAN	Q00839	HNRPU_HUMAN	HNRNPU	Heterogeneous nuclear ribonucleoprotein U		sp|Q00839-2|HNRPU_HUMAN	1	7.3637e+06	MS/MS	STY:79.9663@AKS(0.2193)PQPPVEEEDEHFDDT(0.0804)VVCLDT(0.3501)Y(0.3501)NCDLHFK;
AKSPQPPVEEEDEHFDDTVVCLDTYNCDLHFK	AKS[79.9663]PQPPVEEEDEHFDDTVVC[57.0215]LDTYNC[57.0215]DLHFK	R	I	269	300	32	4	21C(57.0215),27C(57.0215),3S(79.9663)	sp|Q00839|HNRPU_HUMAN	Q00839	HNRPU_HUMAN	HNRNPU	Heterogeneous nuclear ribonucleoprotein U		sp|Q00839-2|HNRPU_HUMAN	2	7.4252e+06	MS/MS	STY:79.9663@AKS(0.9024)PQPPVEEEDEHFDDT(0.0319)VVCLDT(0.0328)Y(0.0328)NCDLHFK;
AKSPTPDGSER	AKS[79.9663]PT[79.9663]PDGSER	R	I	144	154	11	2	3S(79.9663),5T(79.9663)	sp|Q96MU7-2|YTDC1_HUMAN	Q96MU7-2	YTDC1_HUMAN	YTHDC1	Isoform 2 of YTH domain-containing protein 1		sp|Q96MU7|YTDC1_HUMAN	1	3.11551e+06	MS/MS	STY:79.9663@AKS(0.6667)PT(0.6667)PDGS(0.6667)ER;
ALAAGADSPK	ALAAGADS[79.9663]PK	R	T	125	134	10	2	8S(79.9663)	sp|Q4KMP7|TB10B_HUMAN	Q4KMP7	TB10B_HUMAN	TBC1D10B	TBC1 domain family member 10B			1	0	MS/MS	STY:79.9663@ALAAGADS(1.0000)PK;
ALDISLSSGEEDEGDEEDSTAGTTK	ALDISLSSGEEDEGDEEDS[79.9663]T[79.9663]AGT[79.9663]TK	K	Q	329	353	25	3	19S(79.9663),20T(79.9663),23T(79.9663)	sp|Q8IY81|SPB1_HUMAN	Q8IY81	SPB1_HUMAN	FTSJ3	pre-rRNA 2'-O-ribose RNA methyltransferase FTSJ3			1	5.65233e+06	MS/MS	STY:79.9663@ALDIS(0.3880)LS(0.3880)S(0.3880)GEEDEGDEEDS(0.4590)T(0.4590)AGT(0.4590)T(0.4590)K;
ALDISLSSGEEDEGDEEDSTAGTTK	ALDIS[79.9663]LS[79.9663]SGEEDEGDEEDSTAGTTK	K	Q	329	353	25	3	5S(79.9663),7S(79.9663)	sp|Q8IY81|SPB1_HUMAN	Q8IY81	SPB1_HUMAN	FTSJ3	pre-rRNA 2'-O-ribose RNA methyltransferase FTSJ3			4	1.1523004E7	MS/MS	STY:79.9663@ALDIS(0.7090)LS(0.5931)S(0.5931)GEEDEGDEEDS(0.0267)T(0.0267)AGT(0.0257)T(0.0257)K;
ALDISLSSGEEDEGDEEDSTAGTTK	ALDIS[79.9663]LS[79.9663]SGEEDEGDEEDS[79.9663]TAGTTK	K	Q	329	353	25	3	19S(79.9663),5S(79.9663),7S(79.9663)	sp|Q8IY81|SPB1_HUMAN	Q8IY81	SPB1_HUMAN	FTSJ3	pre-rRNA 2'-O-ribose RNA methyltransferase FTSJ3			1	0	MS/MS	STY:79.9663@ALDIS(0.6176)LS(0.5596)S(0.5596)GEEDEGDEEDS(0.6130)T(0.2147)AGT(0.2177)T(0.2177)K;
ALDISLSSGEEDEGDEEDSTAGTTK	ALDIS[79.9663]LS[79.9663]S[79.9663]GEEDEGDEEDSTAGTTK	K	Q	329	353	25	3	5S(79.9663),7S(79.9663),8S(79.9663)	sp|Q8IY81|SPB1_HUMAN	Q8IY81	SPB1_HUMAN	FTSJ3	pre-rRNA 2'-O-ribose RNA methyltransferase FTSJ3			1	5.65233e+06	MS/MS	STY:79.9663@ALDIS(0.6621)LS(0.6640)S(0.6640)GEEDEGDEEDS(0.2525)T(0.2525)AGT(0.2525)T(0.2525)K;
ALEEGDGSVSGSSPR	ALEEGDGS[79.9663]VSGSSPR	R	S	422	436	15	2	8S(79.9663)	sp|Q8N3X1-2|FNBP4_HUMAN	Q8N3X1-2	FNBP4_HUMAN	FNBP4	Isoform 2 of Formin-binding protein 4		sp|Q8N3X1|FNBP4_HUMAN	1	0	MS/MS	STY:79.9663@ALEEGDGS(0.2500)VS(0.2500)GS(0.2500)S(0.2500)PR;
ALFKPPEDSQDDESDSDAEEEQTTK	ALFKPPEDSQDDESDSDAEEEQT[79.9663]T[79.9663]K	K	R	299	323	25	3	23T(79.9663),24T(79.9663)	sp|Q13769|THOC5_HUMAN	Q13769	THOC5_HUMAN	THOC5	THO complex subunit 5 homolog			3	2.3601198E7	MS/MS	STY:79.9663@ALFKPPEDS(0.1878)QDDES(0.1878)DS(0.1878)DAEEEQT(0.7183)T(0.7183)K;
ALFKPPEDSQDDESDSDAEEEQTTK	ALFKPPEDSQDDES[79.9663]DS[79.9663]DAEEEQTTK	K	R	299	323	25	3	14S(79.9663),16S(79.9663)	sp|Q13769|THOC5_HUMAN	Q13769	THOC5_HUMAN	THOC5	THO complex subunit 5 homolog			4	2.3601198E7	MS/MS	STY:79.9663@ALFKPPEDS(0.1316)QDDES(0.8228)DS(0.8228)DAEEEQT(0.1114)T(0.1114)K;
ALFKPPEDSQDDESDSDAEEEQTTK	ALFKPPEDS[79.9663]QDDESDS[79.9663]DAEEEQTTK	K	R	299	323	25	3	16S(79.9663),9S(79.9663)	sp|Q13769|THOC5_HUMAN	Q13769	THOC5_HUMAN	THOC5	THO complex subunit 5 homolog			2	2.3601198E7	MS/MS	STY:79.9663@ALFKPPEDS(0.5090)QDDES(0.0957)DS(0.5364)DAEEEQT(0.4295)T(0.4295)K;
ALFKPPEDSQDDESDSDAEEEQTTK	ALFKPPEDS[79.9663]QDDES[79.9663]DSDAEEEQTTK	K	R	299	323	25	3	14S(79.9663),9S(79.9663)	sp|Q13769|THOC5_HUMAN	Q13769	THOC5_HUMAN	THOC5	THO complex subunit 5 homolog			2	2.3601198E7	MS/MS	STY:79.9663@ALFKPPEDS(0.4471)QDDES(0.4471)DS(0.2118)DAEEEQT(0.4471)T(0.4471)K;
ALFKPPEDSQDDESDSDAEEEQTTK	ALFKPPEDS[79.9663]QDDES[79.9663]DS[79.9663]DAEEEQTTK	K	R	299	323	25	3	14S(79.9663),16S(79.9663),9S(79.9663)	sp|Q13769|THOC5_HUMAN	Q13769	THOC5_HUMAN	THOC5	THO complex subunit 5 homolog			1	6554697	MS/MS	STY:79.9663@ALFKPPEDS(0.6000)QDDES(0.6000)DS(0.6000)DAEEEQT(0.6000)T(0.6000)K;
ALPSLNTGSSSPR	ALPS[79.9663]LNTGSSSPR	R	G	317	329	13	2	4S(79.9663)	sp|O14545|TRAD1_HUMAN	O14545	TRAD1_HUMAN	TRAFD1	TRAF-type zinc finger domain-containing protein 1			1	0	MS/MS	STY:79.9663@ALPS(0.2000)LNT(0.2000)GS(0.2000)S(0.2000)S(0.2000)PR;
ALQAPHSPSK	ALQAPHS[79.9663]PSK	R	T	8	17	10	2	7S(79.9663)	sp|Q96AQ6-2|PBIP1_HUMAN	Q96AQ6-2	PBIP1_HUMAN	PBXIP1	Isoform 2 of Pre-B-cell leukemia transcription factor-interacting protein 1		sp|Q96AQ6-3|PBIP1_HUMAN, sp|Q96AQ6|PBIP1_HUMAN	1	679612	MS/MS	STY:79.9663@ALQAPHS(0.7831)PS(0.2169)K;
ALSSLHGDDQDSEDEVLTIPEVK	ALSSLHGDDQDS[79.9663]EDEVLTIPEVK	K	V	2398	2420	23	3	12S(79.9663)	sp|P11717|MPRI_HUMAN	P11717	MPRI_HUMAN	IGF2R	Cation-independent mannose-6-phosphate receptor			1	3647896	MS/MS	STY:79.9663@ALS(0.0239)S(0.0239)LHGDDQDS(0.4761)EDEVLT(0.4761)IPEVK;
ALSASHTDLAH	ALS[79.9663]ASHTDLAH	R	-	627	637	11	2	3S(79.9663)	sp|Q07866-4|KLC1_HUMAN	Q07866-4	KLC1_HUMAN	KLC1	Isoform J of Kinesin light chain 1		sp|Q07866-6|KLC1_HUMAN, sp|Q07866-7|KLC1_HUMAN	1	1.12707e+06	MS/MS	STY:79.9663@ALS(0.3333)AS(0.3333)HT(0.3333)DLAH;
ALSSDSILSPAPDAR	ALS[79.9663]SDSILSPAPDAR	R	A	392	406	15	2	3S(79.9663)	sp|Q8IVT2|MISP_HUMAN	Q8IVT2	MISP_HUMAN	MISP	Mitotic interactor and substrate of PLK1			1	0	MS/MS	STY:79.9663@ALS(0.3171)S(0.3171)DS(0.3171)ILS(0.0486)PAPDAR;
ALSSLHGDDQDSEDEVLTIPEVK	ALS[79.9663]SLHGDDQDSEDEVLTIPEVK	K	V	2398	2420	23	3	3S(79.9663)	sp|P11717|MPRI_HUMAN	P11717	MPRI_HUMAN	IGF2R	Cation-independent mannose-6-phosphate receptor			2	3.69685e+06	MS/MS	STY:79.9663@ALS(0.3367)S(0.3367)LHGDDQDS(0.2038)EDEVLT(0.1228)IPEVK;
ALVATPGKK	ALVAT[79.9663]PGKK	K	G	117	125	9	2	5T(79.9663)	sp|P19338|NUCL_HUMAN	P19338	NUCL_HUMAN	NCL	Nucleolin			2	2089049	MS/MS	STY:79.9663@ALVAT(1.0000)PGKK;
ALVEFESNPEETREPGSPPSVQR	ALVEFESNPEETREPGSPPS[79.9663]VQR	R	A	31	53	23	3	20S(79.9663)	sp|Q9H6F5|CCD86_HUMAN	Q9H6F5	CCD86_HUMAN	CCDC86	Coiled-coil domain-containing protein 86			2	1.108039E7	MS/MS	STY:79.9663@ALVEFES(0.0196)NPEET(0.0273)REPGS(0.0346)PPS(0.9185)VQR;
ALVEFESNPEETREPGSPPSVQR	ALVEFESNPEET[79.9663]REPGSPPSVQR	R	A	31	53	23	3	12T(79.9663)	sp|Q9H6F5|CCD86_HUMAN	Q9H6F5	CCD86_HUMAN	CCDC86	Coiled-coil domain-containing protein 86			1	5.95992e+06	MS/MS	STY:79.9663@ALVEFES(0.0505)NPEET(0.3165)REPGS(0.3165)PPS(0.3165)VQR;
ALVVPEPEPDSDSNQER	ALVVPEPEPDS[79.9663]DSNQER	K	K	126	142	17	2	11S(79.9663)	sp|Q5VTR2|BRE1A_HUMAN	Q5VTR2	BRE1A_HUMAN	RNF20	E3 ubiquitin-protein ligase BRE1A			3	2.84334e+06	MS/MS	STY:79.9663@ALVVPEPEPDS(0.5000)DS(0.5000)NQER;
AMDNHSDSEEELAAFCPQLDDSTVAR	AMDNHS[79.9663]DS[79.9663]EEELAAFC[57.0215]PQLDDSTVAR	R	E	58	83	26	3	16C(57.0215),6S(79.9663),8S(79.9663)	sp|Q86VR2-2|RETR3_HUMAN	Q86VR2-2	RETR3_HUMAN	RETREG3	Isoform 2 of Reticulophagy regulator 3		sp|Q86VR2|RETR3_HUMAN	2	6332416	MS/MS	STY:79.9663@AMDNHS(0.7783)DS(0.7783)EEELAAFCPQLDDS(0.2217)T(0.2217)VAR;
AMSTTSISSPQPGK	AMS[79.9663]TTSISSPQPGK	R	L	268	281	14	2	3S(79.9663)	sp|Q9UJU6-2|DBNL_HUMAN	Q9UJU6-2	DBNL_HUMAN	DBNL	Isoform 2 of Drebrin-like protein		sp|Q9UJU6-3|DBNL_HUMAN, sp|Q9UJU6-4|DBNL_HUMAN, sp|Q9UJU6-5|DBNL_HUMAN, sp|Q9UJU6-6|DBNL_HUMAN, sp|Q9UJU6|DBNL_HUMAN	2	2.86349e+06	MS/MS	STY:79.9663@AMS(0.2475)T(0.2475)T(0.2475)S(0.2475)IS(0.0049)S(0.0049)PQPGK;
AMSTTSISSPQPGK	AM[15.9949]S[79.9663]TTSISSPQPGK	R	L	268	281	14	2	2M(15.9949),3S(79.9663)	sp|Q9UJU6-2|DBNL_HUMAN	Q9UJU6-2	DBNL_HUMAN	DBNL	Isoform 2 of Drebrin-like protein		sp|Q9UJU6-3|DBNL_HUMAN, sp|Q9UJU6-4|DBNL_HUMAN, sp|Q9UJU6-5|DBNL_HUMAN, sp|Q9UJU6-6|DBNL_HUMAN, sp|Q9UJU6|DBNL_HUMAN	1	0	MS/MS	STY:79.9663@AMS(0.2409)T(0.2409)T(0.2409)S(0.2409)IS(0.0182)S(0.0182)PQPGK;M:15.9949@AM(1.0000)STTSISSPQPGK;
ANNSQEPSPQLASSVASTR	ANNS[79.9663]QEPSPQLASSVASTR	K	S	306	324	19	3	4S(79.9663)	sp|Q96HC4|PDLI5_HUMAN	Q96HC4	PDLI5_HUMAN	PDLIM5	PDZ and LIM domain protein 5		sp|Q96HC4-4|PDLI5_HUMAN, sp|Q96HC4-7|PDLI5_HUMAN	1	0	MS/MS	STY:79.9663@ANNS(0.1667)QEPS(0.1667)PQLAS(0.1667)S(0.1667)VAS(0.1667)T(0.1667)R;
ANSPEKPPEAGAAHK	ANS[79.9663]PEKPPEAGAAHK	K	P	210	224	15	3	3S(79.9663)	sp|Q9UFC0|LRWD1_HUMAN	Q9UFC0	LRWD1_HUMAN	LRWD1	Leucine-rich repeat and WD repeat-containing protein 1			1	1.87462e+06	MS/MS	STY:79.9663@ANS(1.0000)PEKPPEAGAAHK;
APEPLGPADQSELGPEQLEAEVGESSDEEPVESR	APEPLGPADQSELGPEQLEAEVGES[79.9663]SDEEPVES[79.9663]R	K	A	141	174	34	4	25S(79.9663),33S(79.9663)	sp|Q969G5|CAVN3_HUMAN	Q969G5	CAVN3_HUMAN	CAVIN3	Caveolae-associated protein 3			1	0	MS/MS	STY:79.9663@APEPLGPADQS(0.1659)ELGPEQLEAEVGES(0.5956)S(0.5956)DEEPVES(0.6430)R;
APEPLGPADQSELGPEQLEAEVGESSDEEPVESR	APEPLGPADQSELGPEQLEAEVGES[79.9663]S[79.9663]DEEPVESR	K	A	141	174	34	3,4	25S(79.9663),26S(79.9663)	sp|Q969G5|CAVN3_HUMAN	Q969G5	CAVN3_HUMAN	CAVIN3	Caveolae-associated protein 3			3	5.7297636E7	MS/MS	STY:79.9663@APEPLGPADQS(0.5326)ELGPEQLEAEVGES(0.7119)S(0.7119)DEEPVES(0.0436)R;
APEPLGPADQSELGPEQLEAEVGESSDEEPVESR	APEPLGPADQS[79.9663]ELGPEQLEAEVGES[79.9663]SDEEPVESR	K	A	141	174	34	3	11S(79.9663),25S(79.9663)	sp|Q969G5|CAVN3_HUMAN	Q969G5	CAVN3_HUMAN	CAVIN3	Caveolae-associated protein 3			2	4.936824E7	MS/MS	STY:79.9663@APEPLGPADQS(0.6568)ELGPEQLEAEVGES(0.6114)S(0.6114)DEEPVES(0.1203)R;
APIDTSDVEEK	APIDT[79.9663]SDVEEK	K	A	301	311	11	2	5T(79.9663)	sp|Q06265-2|EXOS9_HUMAN	Q06265-2	EXOS9_HUMAN	EXOSC9	Isoform 2 of Exosome complex component RRP45		sp|Q06265-3|EXOS9_HUMAN, sp|Q06265-4|EXOS9_HUMAN, sp|Q06265|EXOS9_HUMAN	4	4.69165e+06	MS/MS	STY:79.9663@APIDT(0.8507)S(0.1493)DVEEK;
APPQTHLPSGASSGTGSASATHGGGSPPGTR	APPQTHLPSGASSGTGSASATHGGGSPPGT[79.9663]R	R	G	88	118	31	4	30T(79.9663)	sp|P46379-2|BAG6_HUMAN	P46379-2	BAG6_HUMAN	BAG6	Isoform 2 of Large proline-rich protein BAG6		sp|P46379-3|BAG6_HUMAN, sp|P46379-4|BAG6_HUMAN, sp|P46379-5|BAG6_HUMAN, sp|P46379|BAG6_HUMAN	1	4.75673e+06	MS/MS	STY:79.9663@APPQT(0.0081)HLPS(0.0081)GAS(0.0082)S(0.0082)GT(0.0090)GS(0.0116)AS(0.0116)AT(0.0116)HGGGS(0.0252)PPGT(0.8982)R;
APPQTHLPSGASSGTGSASATHGGGSPPGTR	APPQTHLPSGASSGTGSASAT[79.9663]HGGGSPPGTR	R	G	88	118	31	3	21T(79.9663)	sp|P46379-2|BAG6_HUMAN	P46379-2	BAG6_HUMAN	BAG6	Isoform 2 of Large proline-rich protein BAG6		sp|P46379-3|BAG6_HUMAN, sp|P46379-4|BAG6_HUMAN, sp|P46379-5|BAG6_HUMAN, sp|P46379|BAG6_HUMAN	1	7127643	MS/MS	STY:79.9663@APPQT(0.0106)HLPS(0.0186)GAS(0.0235)S(0.0655)GT(0.0655)GS(0.0110)AS(0.0110)AT(0.3943)HGGGS(0.3943)PPGT(0.0056)R;
APPQTHLPSGASSGTGSASATHGGGSPPGTR	APPQTHLPSGAS[79.9663]SGTGSASATHGGGSPPGTR	R	G	88	118	31	3	12S(79.9663)	sp|P46379-2|BAG6_HUMAN	P46379-2	BAG6_HUMAN	BAG6	Isoform 2 of Large proline-rich protein BAG6		sp|P46379-3|BAG6_HUMAN, sp|P46379-4|BAG6_HUMAN, sp|P46379-5|BAG6_HUMAN, sp|P46379|BAG6_HUMAN	1	7168818	MS/MS	STY:79.9663@APPQT(0.0033)HLPS(0.0368)GAS(0.1200)S(0.1200)GT(0.1200)GS(0.1200)AS(0.1200)AT(0.1200)HGGGS(0.1200)PPGT(0.1200)R;
APQTSSSPPPVR	APQTSSS[79.9663]PPPVR	R	R	690	701	12	2	7S(79.9663)	sp|Q8IYB3|SRRM1_HUMAN	Q8IYB3	SRRM1_HUMAN	SRRM1	Serine/arginine repetitive matrix protein 1		sp|Q8IYB3-2|SRRM1_HUMAN	2	2.2838662E7	MS/MS	STY:79.9663@APQT(0.0233)S(0.0233)S(0.0233)S(0.9302)PPPVR;
APQTSSSPPPVR	APQTSS[79.9663]SPPPVR	R	R	690	701	12	2	6S(79.9663)	sp|Q8IYB3|SRRM1_HUMAN	Q8IYB3	SRRM1_HUMAN	SRRM1	Serine/arginine repetitive matrix protein 1		sp|Q8IYB3-2|SRRM1_HUMAN	1	0	MS/MS	STY:79.9663@APQT(0.0231)S(0.0231)S(0.4769)S(0.4769)PPPVR;
APQTSSSPPPVR	APQTS[79.9663]SSPPPVR	R	R	690	701	12	2	5S(79.9663)	sp|Q8IYB3|SRRM1_HUMAN	Q8IYB3	SRRM1_HUMAN	SRRM1	Serine/arginine repetitive matrix protein 1		sp|Q8IYB3-2|SRRM1_HUMAN	1	2.2838662E7	MS/MS	STY:79.9663@APQT(0.0093)S(0.3302)S(0.3302)S(0.3302)PPPVR;
APQTSSSPPPVR	APQTS[79.9663]S[79.9663]SPPPVR	R	R	690	701	12	2	5S(79.9663),6S(79.9663)	sp|Q8IYB3|SRRM1_HUMAN	Q8IYB3	SRRM1_HUMAN	SRRM1	Serine/arginine repetitive matrix protein 1		sp|Q8IYB3-2|SRRM1_HUMAN	1	6548572	MS/MS	STY:79.9663@APQT(0.1404)S(0.6199)S(0.6199)S(0.6199)PPPVR;
APQTSSSPPPVR	APQT[79.9663]SSSPPPVR	R	R	690	701	12	2	4T(79.9663)	sp|Q8IYB3|SRRM1_HUMAN	Q8IYB3	SRRM1_HUMAN	SRRM1	Serine/arginine repetitive matrix protein 1		sp|Q8IYB3-2|SRRM1_HUMAN	8	2.2838662E7	MS/MS	STY:79.9663@APQT(0.4664)S(0.4664)S(0.0336)S(0.0336)PPPVR;
APSPAPSSVPLGSEK	APSPAPS[79.9663]SVPLGSEK	R	P	2398	2412	15	2	7S(79.9663)	sp|O75179-2|ANR17_HUMAN	O75179-2	ANR17_HUMAN	ANKRD17	Isoform 2 of Ankyrin repeat domain-containing protein 17		sp|O75179-4|ANR17_HUMAN, sp|O75179-6|ANR17_HUMAN, sp|O75179-7|ANR17_HUMAN, sp|O75179|ANR17_HUMAN	1	2.54594e+06	MS/MS	STY:79.9663@APS(0.0714)PAPS(0.3095)S(0.3095)VPLGS(0.3095)EK;
APVQPQQSPAAAPGGTDEK	APVQPQQSPAAAPGGT[79.9663]DEK	K	P	9	27	19	2	16T(79.9663)	sp|Q13200|PSMD2_HUMAN	Q13200	PSMD2_HUMAN	PSMD2	26S proteasome non-ATPase regulatory subunit 2			1	5799434	MS/MS	STY:79.9663@APVQPQQS(0.1460)PAAAPGGT(0.8540)DEK;
APVQPQQSPAAAPGGTDEK	APVQPQQS[79.9663]PAAAPGGTDEK	K	P	9	27	19	2	8S(79.9663)	sp|Q13200|PSMD2_HUMAN	Q13200	PSMD2_HUMAN	PSMD2	26S proteasome non-ATPase regulatory subunit 2			1	5799434	MS/MS	STY:79.9663@APVQPQQS(0.8817)PAAAPGGT(0.1183)DEK;
APVQPQQSPAAAPGGTDEKPSGK	APVQPQQS[79.9663]PAAAPGGTDEKPSGK	K	E	9	31	23	3	8S(79.9663)	sp|Q13200|PSMD2_HUMAN	Q13200	PSMD2_HUMAN	PSMD2	26S proteasome non-ATPase regulatory subunit 2			1	0	MS/MS	STY:79.9663@APVQPQQS(0.7629)PAAAPGGT(0.1185)DEKPS(0.1185)GK;
AQGEPVAGHESPK	AQGEPVAGHES[79.9663]PK	R	I	750	762	13	2	11S(79.9663)	sp|O94979-10|SC31A_HUMAN	O94979-10	SC31A_HUMAN	SEC31A	Isoform 10 of Protein transport protein Sec31A		sp|O94979-2|SC31A_HUMAN, sp|O94979-3|SC31A_HUMAN, sp|O94979-4|SC31A_HUMAN, sp|O94979-6|SC31A_HUMAN, sp|O94979-7|SC31A_HUMAN, sp|O94979-8|SC31A_HUMAN, sp|O94979-9|SC31A_HUMAN, sp|O94979|SC31A_HUMAN	1	2.63918e+06	MS/MS	STY:79.9663@AQGEPVAGHES(1.0000)PK;
AQGEPVAGHESPKIPYEK	AQGEPVAGHES[79.9663]PKIPYEK	R	Q	750	767	18	3	11S(79.9663)	sp|O94979-10|SC31A_HUMAN	O94979-10	SC31A_HUMAN	SEC31A	Isoform 10 of Protein transport protein Sec31A		sp|O94979-2|SC31A_HUMAN, sp|O94979-3|SC31A_HUMAN, sp|O94979-4|SC31A_HUMAN, sp|O94979-6|SC31A_HUMAN, sp|O94979-7|SC31A_HUMAN, sp|O94979-8|SC31A_HUMAN, sp|O94979-9|SC31A_HUMAN, sp|O94979|SC31A_HUMAN	4	1.1089035E7	MS/MS	STY:79.9663@AQGEPVAGHES(0.9320)PKIPY(0.0680)EK;
AQLEPVASPAK	AQLEPVAS[79.9663]PAK	K	K	1428	1438	11	2	8S(79.9663)	sp|Q15149|PLEC_HUMAN	Q15149	PLEC_HUMAN	PLEC	Plectin		sp|Q15149-2|PLEC_HUMAN, sp|Q15149-3|PLEC_HUMAN, sp|Q15149-4|PLEC_HUMAN, sp|Q15149-5|PLEC_HUMAN, sp|Q15149-6|PLEC_HUMAN, sp|Q15149-7|PLEC_HUMAN, sp|Q15149-8|PLEC_HUMAN, sp|Q15149-9|PLEC_HUMAN	3	2.73293e+06	MS/MS	STY:79.9663@AQLEPVAS(1.0000)PAK;
AQSSPASATFPVSVQEPPTK	AQSSPAS[79.9663]ATFPVSVQEPPTK	R	P	518	537	20	2	7S(79.9663)	sp|P56524-2|HDAC4_HUMAN	P56524-2	HDAC4_HUMAN	HDAC4	Isoform 2 of Histone deacetylase 4		sp|P56524|HDAC4_HUMAN	1	0	MS/MS	STY:79.9663@AQS(0.0304)S(0.0304)PAS(0.2348)AT(0.2348)FPVS(0.2348)VQEPPT(0.2348)K;
AQSLVISPPAPSPR	AQS[79.9663]LVISPPAPSPR	K	K	573	586	14	2	3S(79.9663)	sp|P46013|KI67_HUMAN	P46013	KI67_HUMAN	MKI67	Proliferation marker protein Ki-67		sp|P46013-2|KI67_HUMAN	1	848078	MS/MS	STY:79.9663@AQS(0.3333)LVIS(0.3333)PPAPS(0.3333)PR;
AQSSPAAPASLSAPEPASQAR	AQS[79.9663]SPAAPASLSAPEPASQAR	R	V	146	166	21	2	3S(79.9663)	sp|Q8WUI4-10|HDAC7_HUMAN	Q8WUI4-10	HDAC7_HUMAN	HDAC7	Isoform 10 of Histone deacetylase 7		sp|Q8WUI4-3|HDAC7_HUMAN, sp|Q8WUI4-4|HDAC7_HUMAN, sp|Q8WUI4-5|HDAC7_HUMAN, sp|Q8WUI4-6|HDAC7_HUMAN, sp|Q8WUI4-7|HDAC7_HUMAN, sp|Q8WUI4-8|HDAC7_HUMAN, sp|Q8WUI4|HDAC7_HUMAN	1	0	MS/MS	STY:79.9663@AQS(0.4737)S(0.4737)PAAPAS(0.0175)LS(0.0175)APEPAS(0.0175)QAR;
AQTLPTSVVTITSESSPGKR	AQTLPTSVVTIT[79.9663]SESSPGKR	R	E	2326	2345	20	3	12T(79.9663)	sp|Q01082|SPTB2_HUMAN	Q01082	SPTB2_HUMAN	SPTBN1	Spectrin beta chain, non-erythrocytic 1			1	1.35649e+06	MS/MS	STY:79.9663@AQT(0.0380)LPT(0.0380)S(0.0380)VVT(0.0380)IT(0.3865)S(0.3865)ES(0.0374)S(0.0374)PGKR;
AQTLPTSVVTITSESSPGKR	AQTLPT[79.9663]SVVTITSESSPGKR	R	E	2326	2345	20	3	6T(79.9663)	sp|Q01082|SPTB2_HUMAN	Q01082	SPTB2_HUMAN	SPTBN1	Spectrin beta chain, non-erythrocytic 1			1	1.35649e+06	MS/MS	STY:79.9663@AQT(0.0288)LPT(0.1387)S(0.1387)VVT(0.1387)IT(0.1387)S(0.1387)ES(0.1387)S(0.1387)PGKR;
AQTPPGPSLSGSK	AQT[79.9663]PPGPSLSGSK	K	S	1001	1013	13	2	3T(79.9663)	sp|Q9UQ35|SRRM2_HUMAN	Q9UQ35	SRRM2_HUMAN	SRRM2	Serine/arginine repetitive matrix protein 2		sp|Q9UQ35-2|SRRM2_HUMAN	4	5807737	MS/MS	STY:79.9663@AQT(0.9372)PPGPS(0.0209)LS(0.0209)GS(0.0209)K;
ARSVSPPPK	ARS[79.9663]VS[79.9663]PPPK	K	R	312	320	9	2,3	3S(79.9663),5S(79.9663)	sp|Q13247|SRSF6_HUMAN	Q13247	SRSF6_HUMAN	SRSF6	Serine/arginine-rich splicing factor 6			11	8.7185216E7	MS/MS	STY:79.9663@ARS(1.0000)VS(1.0000)PPPK;
ASAVSELSPR	ASAVSELS[79.9663]PR	R	E	236	245	10	2	8S(79.9663)	sp|Q9Y2W1|TR150_HUMAN	Q9Y2W1	TR150_HUMAN	THRAP3	Thyroid hormone receptor-associated protein 3			4	1.1686757E7	MS/MS	STY:79.9663@AS(0.0369)AVS(0.0308)ELS(0.9323)PR;
ASAVSELSPR	ASAVS[79.9663]ELSPR	R	E	236	245	10	2	5S(79.9663)	sp|Q9Y2W1|TR150_HUMAN	Q9Y2W1	TR150_HUMAN	THRAP3	Thyroid hormone receptor-associated protein 3			1	1.1686757E7	MS/MS	STY:79.9663@AS(0.0718)AVS(0.4641)ELS(0.4641)PR;
ASEDTTSGSPPKK	ASEDTTSGS[79.9663]PPKK	R	S	456	468	13	2	9S(79.9663)	sp|Q9BZZ5-1|API5_HUMAN	Q9BZZ5-1	API5_HUMAN	API5	Isoform 1 of Apoptosis inhibitor 5		sp|Q9BZZ5-2|API5_HUMAN, sp|Q9BZZ5-5|API5_HUMAN, sp|Q9BZZ5-6|API5_HUMAN, sp|Q9BZZ5|API5_HUMAN	1	1.27213e+06	MS/MS	STY:79.9663@AS(0.0169)EDT(0.0169)T(0.0224)S(0.0286)GS(0.9153)PPKK;
ASLGSLEGEAEAEASSPK	ASLGSLEGEAEAEASS[79.9663]PK	K	G	5748	5765	18	2	16S(79.9663)	sp|Q09666|AHNK_HUMAN	Q09666	AHNK_HUMAN	AHNAK	Neuroblast differentiation-associated protein AHNAK			1	9073553	MS/MS	STY:79.9663@AS(0.0259)LGS(0.0259)LEGEAEAEAS(0.1234)S(0.8248)PK;
ASLGSLEGEAEAEASSPK	ASLGSLEGEAEAEAS[79.9663]SPK	K	G	5748	5765	18	2	15S(79.9663)	sp|Q09666|AHNK_HUMAN	Q09666	AHNK_HUMAN	AHNAK	Neuroblast differentiation-associated protein AHNAK			1	9439358	MS/MS	STY:79.9663@AS(0.0207)LGS(0.0277)LEGEAEAEAS(0.4758)S(0.4758)PK;
ASLGSLEGEAEAEASSPK	ASLGS[79.9663]LEGEAEAEASSPK	K	G	5748	5765	18	2	5S(79.9663)	sp|Q09666|AHNK_HUMAN	Q09666	AHNK_HUMAN	AHNAK	Neuroblast differentiation-associated protein AHNAK			1	9073553	MS/MS	STY:79.9663@AS(0.2098)LGS(0.2634)LEGEAEAEAS(0.2634)S(0.2634)PK;
ASSHSSQTQGGGSVTKK	ASSHSSQTQGGGS[79.9663]VTKK	R	R	402	418	17	3	13S(79.9663)	sp|P02545-3|LMNA_HUMAN	P02545-3	LMNA_HUMAN	LMNA	Isoform ADelta10 of Prelamin-A/C		sp|P02545-2|LMNA_HUMAN, sp|P02545-4|LMNA_HUMAN, sp|P02545-5|LMNA_HUMAN, sp|P02545-6|LMNA_HUMAN, sp|P02545|LMNA_HUMAN	1	570317	MS/MS	STY:79.9663@AS(0.0120)S(0.0120)HS(0.0120)S(0.0120)QT(0.0120)QGGGS(0.4699)VT(0.4699)KK;
ASSHSSQTQGGGSVTK	ASSHSSQT[79.9663]QGGGSVTK	R	K	402	417	16	2	8T(79.9663)	sp|P02545-3|LMNA_HUMAN	P02545-3	LMNA_HUMAN	LMNA	Isoform ADelta10 of Prelamin-A/C		sp|P02545-2|LMNA_HUMAN, sp|P02545-4|LMNA_HUMAN, sp|P02545-5|LMNA_HUMAN, sp|P02545-6|LMNA_HUMAN, sp|P02545|LMNA_HUMAN	3	4.1572472E7	MS/MS	STY:79.9663@AS(0.0388)S(0.0388)HS(0.0388)S(0.0388)QT(0.7206)QGGGS(0.1152)VT(0.0090)K;
ASSHSSQTQGGGSVTK	ASSHS[79.9663]S[79.9663]QTQGGGSVTK	R	K	402	417	16	2	5S(79.9663),6S(79.9663)	sp|P02545-3|LMNA_HUMAN	P02545-3	LMNA_HUMAN	LMNA	Isoform ADelta10 of Prelamin-A/C		sp|P02545-2|LMNA_HUMAN, sp|P02545-4|LMNA_HUMAN, sp|P02545-5|LMNA_HUMAN, sp|P02545-6|LMNA_HUMAN, sp|P02545|LMNA_HUMAN	1	0	MS/MS	STY:79.9663@AS(0.0599)S(0.0599)HS(0.3760)S(0.3760)QT(0.3760)QGGGS(0.3760)VT(0.3760)K;
ASSHSSQTQGGGSVTK	ASS[79.9663]HSSQTQGGGSVTK	R	K	402	417	16	2	3S(79.9663)	sp|P02545-3|LMNA_HUMAN	P02545-3	LMNA_HUMAN	LMNA	Isoform ADelta10 of Prelamin-A/C		sp|P02545-2|LMNA_HUMAN, sp|P02545-4|LMNA_HUMAN, sp|P02545-5|LMNA_HUMAN, sp|P02545-6|LMNA_HUMAN, sp|P02545|LMNA_HUMAN	1	2.3013038E7	MS/MS	STY:79.9663@AS(0.0659)S(0.8333)HS(0.0213)S(0.0213)QT(0.0213)QGGGS(0.0184)VT(0.0184)K;
ASAVSELSPR	AS[79.9663]AVSELSPR	R	E	236	245	10	2	2S(79.9663)	sp|Q9Y2W1|TR150_HUMAN	Q9Y2W1	TR150_HUMAN	THRAP3	Thyroid hormone receptor-associated protein 3			3	1.3970588E7	MS/MS	STY:79.9663@AS(0.3333)AVS(0.3333)ELS(0.3333)PR;
ASGVAVSDGVIK	AS[79.9663]GVAVSDGVIK	M	V	2	13	12	2	2S(79.9663)	sp|P23528|COF1_HUMAN	P23528	COF1_HUMAN	CFL1	Cofilin-1			2	601945	MS/MS	STY:79.9663@AS(0.5000)GVAVS(0.5000)DGVIK;
ASLGSLEGEAEAEASSPK	AS[79.9663]LGS[79.9663]LEGEAEAEASSPK	K	G	5748	5765	18	2	2S(79.9663),5S(79.9663)	sp|Q09666|AHNK_HUMAN	Q09666	AHNK_HUMAN	AHNAK	Neuroblast differentiation-associated protein AHNAK			2	0	MS/MS	STY:79.9663@AS(0.8715)LGS(0.8715)LEGEAEAEAS(0.1285)S(0.1285)PK;
ASPEPQRENASPAPGTTAEEAMSR	AS[79.9663]PEPQRENASPAPGTTAEEAMSR	R	G	957	980	24	3	2S(79.9663)	sp|P46379-2|BAG6_HUMAN	P46379-2	BAG6_HUMAN	BAG6	Isoform 2 of Large proline-rich protein BAG6		sp|P46379-3|BAG6_HUMAN, sp|P46379-5|BAG6_HUMAN, sp|P46379|BAG6_HUMAN	1	526756	MS/MS	STY:79.9663@AS(0.4222)PEPQRENAS(0.4222)PAPGT(0.0518)T(0.0518)AEEAMS(0.0518)R;
ASPPGDLQNPK	AS[79.9663]PPGDLQNPK	K	R	314	324	11	2	2S(79.9663)	sp|O00273|DFFA_HUMAN	O00273	DFFA_HUMAN	DFFA	DNA fragmentation factor subunit alpha			2	6449227	MS/MS	STY:79.9663@AS(1.0000)PPGDLQNPK;
ASSHSSQTQGGGSVTK	AS[79.9663]SHSSQTQGGGSVTK	R	K	402	417	16	2	2S(79.9663)	sp|P02545-3|LMNA_HUMAN	P02545-3	LMNA_HUMAN	LMNA	Isoform ADelta10 of Prelamin-A/C		sp|P02545-2|LMNA_HUMAN, sp|P02545-4|LMNA_HUMAN, sp|P02545-5|LMNA_HUMAN, sp|P02545-6|LMNA_HUMAN, sp|P02545|LMNA_HUMAN	7	4.1572472E7	MS/MS	STY:79.9663@AS(0.4769)S(0.4769)HS(0.0092)S(0.0092)QT(0.0092)QGGGS(0.0092)VT(0.0092)K;
ASSLEDLVLK	AS[79.9663]SLEDLVLK	R	E	254	263	10	2	2S(79.9663)	sp|Q15477|SKI2_HUMAN	Q15477	SKI2_HUMAN	SKIC2	Superkiller complex protein 2			4	3.77596e+06	MS/MS	STY:79.9663@AS(0.5000)S(0.5000)LEDLVLK;
ASSLGEIDESSELR	AS[79.9663]SLGEIDESSELR	R	V	565	578	14	2	2S(79.9663)	sp|Q16513-2|PKN2_HUMAN	Q16513-2	PKN2_HUMAN	PKN2	Isoform 2 of Serine/threonine-protein kinase N2		sp|Q16513-3|PKN2_HUMAN, sp|Q16513-4|PKN2_HUMAN, sp|Q16513-5|PKN2_HUMAN, sp|Q16513|PKN2_HUMAN	1	1.45038e+06	MS/MS	STY:79.9663@AS(0.4865)S(0.4865)LGEIDES(0.0135)S(0.0135)ELR;
ASSLSESSPPK	AS[79.9663]SLSESSPPK	R	A	207	217	11	2	2S(79.9663)	sp|Q9UHB6-2|LIMA1_HUMAN	Q9UHB6-2	LIMA1_HUMAN	LIMA1	Isoform Alpha of LIM domain and actin-binding protein 1		sp|Q9UHB6-3|LIMA1_HUMAN, sp|Q9UHB6-4|LIMA1_HUMAN, sp|Q9UHB6-5|LIMA1_HUMAN, sp|Q9UHB6|LIMA1_HUMAN	1	1945944	MS/MS	STY:79.9663@AS(0.4825)S(0.4825)LS(0.0120)ES(0.0115)S(0.0115)PPK;
ASSPSPLTIGTPESQR	AS[79.9663]SPSPLTIGTPESQR	K	K	483	498	16	2	2S(79.9663)	sp|Q9NPI6-2|DCP1A_HUMAN	Q9NPI6-2	DCP1A_HUMAN	DCP1A	Isoform 2 of mRNA-decapping enzyme 1A		sp|Q9NPI6|DCP1A_HUMAN	1	0	MS/MS	STY:79.9663@AS(0.2947)S(0.2947)PS(0.2947)PLT(0.0243)IGT(0.0243)PES(0.0673)QR;
ASSHSSQTQGGGSVTK	AS[79.9663]S[79.9663]HSSQTQGGGSVTK	R	K	402	417	16	2	2S(79.9663),3S(79.9663)	sp|P02545-3|LMNA_HUMAN	P02545-3	LMNA_HUMAN	LMNA	Isoform ADelta10 of Prelamin-A/C		sp|P02545-2|LMNA_HUMAN, sp|P02545-4|LMNA_HUMAN, sp|P02545-5|LMNA_HUMAN, sp|P02545-6|LMNA_HUMAN, sp|P02545|LMNA_HUMAN	2	0	MS/MS	STY:79.9663@AS(0.2857)S(0.2857)HS(0.2857)S(0.2857)QT(0.2857)QGGGS(0.2857)VT(0.2857)K;
ASVVDPSTESSPAPQEGSEQPASPASPLSSR	AS[79.9663]VVDPSTESSPAPQEGSEQPASPASPLSSR	K	Q	410	440	31	3	2S(79.9663)	sp|Q66K14-2|TBC9B_HUMAN	Q66K14-2	TBC9B_HUMAN	TBC1D9B	Isoform 2 of TBC1 domain family member 9B		sp|Q66K14|TBC9B_HUMAN	1	1.36505e+06	MS/MS	STY:79.9663@AS(0.2736)VVDPS(0.2736)T(0.0119)ES(0.0119)S(0.1599)PAPQEGS(0.0538)EQPAS(0.0538)PAS(0.0538)PLS(0.0538)S(0.0538)R;
ATAPQTQHVSPMR	ATAPQTQHVS[79.9663]PMR	R	Q	490	502	13	2,3	10S(79.9663)	sp|P29692-2|EF1D_HUMAN	P29692-2	EF1D_HUMAN	EEF1D	Isoform 2 of Elongation factor 1-delta		sp|P29692-3|EF1D_HUMAN, sp|P29692-4|EF1D_HUMAN, sp|P29692|EF1D_HUMAN	11	8.6544E7	MS/MS	STY:79.9663@AT(0.0295)APQT(0.0316)QHVS(0.9388)PMR;
ATAPQTQHVSPMR	ATAPQTQHVS[79.9663]PM[15.9949]R	R	Q	490	502	13	2	10S(79.9663),12M(15.9949)	sp|P29692-2|EF1D_HUMAN	P29692-2	EF1D_HUMAN	EEF1D	Isoform 2 of Elongation factor 1-delta		sp|P29692-3|EF1D_HUMAN, sp|P29692-4|EF1D_HUMAN, sp|P29692|EF1D_HUMAN	2	3.9133048E7	MS/MS	STY:79.9663@AT(0.0437)APQT(0.0753)QHVS(0.8811)PMR;M:15.9949@ATAPQTQHVSPM(1.0000)R;
ATAPQTQHVSPMR	ATAPQT[79.9663]QHVSPMR	R	Q	490	502	13	2	6T(79.9663)	sp|P29692-2|EF1D_HUMAN	P29692-2	EF1D_HUMAN	EEF1D	Isoform 2 of Elongation factor 1-delta		sp|P29692-3|EF1D_HUMAN, sp|P29692-4|EF1D_HUMAN, sp|P29692|EF1D_HUMAN	1	4.40036E7	MS/MS	STY:79.9663@AT(0.0212)APQT(0.4894)QHVS(0.4894)PMR;
ATAPQTQHVSPMR	ATAPQT[79.9663]QHVSPM[15.9949]R	R	Q	490	502	13	2	12M(15.9949),6T(79.9663)	sp|P29692-2|EF1D_HUMAN	P29692-2	EF1D_HUMAN	EEF1D	Isoform 2 of Elongation factor 1-delta		sp|P29692-3|EF1D_HUMAN, sp|P29692-4|EF1D_HUMAN, sp|P29692|EF1D_HUMAN	1	2.1684796E7	MS/MS	STY:79.9663@AT(0.0189)APQT(0.4906)QHVS(0.4906)PMR;M:15.9949@ATAPQTQHVSPM(1.0000)R;
ATEDGEEDEVSAGEK	ATEDGEEDEVS[79.9663]AGEK	K	E	1425	1439	15	2	11S(79.9663)	sp|Q9BXW9|FACD2_HUMAN	Q9BXW9	FACD2_HUMAN	FANCD2	Fanconi anemia group D2 protein			2	2.92322e+06	MS/MS	STY:79.9663@AT(0.1138)EDGEEDEVS(0.8862)AGEK;
ATSSTQSLAR	ATS[79.9663]STQSLAR	R	L	1836	1845	10	2	3S(79.9663)	sp|Q14980-2|NUMA1_HUMAN	Q14980-2	NUMA1_HUMAN	NUMA1	Isoform 2 of Nuclear mitotic apparatus protein 1		sp|Q14980-5|NUMA1_HUMAN, sp|Q14980|NUMA1_HUMAN	1	0	MS/MS	STY:79.9663@AT(0.0661)S(0.2335)S(0.2335)T(0.2335)QS(0.2335)LAR;
ATVTPSPVK	ATVTPS[79.9663]PVK	K	G	176	184	9	2	6S(79.9663)	sp|Q9H1E3|NUCKS_HUMAN	Q9H1E3	NUCKS_HUMAN	NUCKS1	Nuclear ubiquitous casein and cyclin-dependent kinase substrate 1		sp|Q9H1E3-2|NUCKS_HUMAN	3	3.1551476E7	MS/MS	STY:79.9663@AT(0.0314)VT(0.0314)PS(0.9372)PVK;
ATVTPSPVK	ATVT[79.9663]PSPVK	K	G	176	184	9	2	4T(79.9663)	sp|Q9H1E3|NUCKS_HUMAN	Q9H1E3	NUCKS_HUMAN	NUCKS1	Nuclear ubiquitous casein and cyclin-dependent kinase substrate 1		sp|Q9H1E3-2|NUCKS_HUMAN	3	3.1492676E7	MS/MS	STY:79.9663@AT(0.0173)VT(0.4913)PS(0.4913)PVK;
ATVTPSPVK	ATVT[79.9663]PS[79.9663]PVK	K	G	176	184	9	2	4T(79.9663),6S(79.9663)	sp|Q9H1E3|NUCKS_HUMAN	Q9H1E3	NUCKS_HUMAN	NUCKS1	Nuclear ubiquitous casein and cyclin-dependent kinase substrate 1		sp|Q9H1E3-2|NUCKS_HUMAN	1	8768595	MS/MS	STY:79.9663@AT(0.4491)VT(0.7766)PS(0.7743)PVK;
ATAPQTQHVSPMR	AT[79.9663]APQTQHVSPMR	R	Q	490	502	13	2,3	2T(79.9663)	sp|P29692-2|EF1D_HUMAN	P29692-2	EF1D_HUMAN	EEF1D	Isoform 2 of Elongation factor 1-delta		sp|P29692-3|EF1D_HUMAN, sp|P29692-4|EF1D_HUMAN, sp|P29692|EF1D_HUMAN	6	8.6487368E7	MS/MS	STY:79.9663@AT(0.8887)APQT(0.0556)QHVS(0.0556)PMR;
ATAPQTQHVSPMR	AT[79.9663]APQTQHVSPM[15.9949]R	R	Q	490	502	13	2,3	12M(15.9949),2T(79.9663)	sp|P29692-2|EF1D_HUMAN	P29692-2	EF1D_HUMAN	EEF1D	Isoform 2 of Elongation factor 1-delta		sp|P29692-3|EF1D_HUMAN, sp|P29692-4|EF1D_HUMAN, sp|P29692|EF1D_HUMAN	3	3.6917056E7	MS/MS	STY:79.9663@AT(0.8631)APQT(0.0847)QHVS(0.0522)PMR;M:15.9949@ATAPQTQHVSPM(1.0000)R;
ATAQPPAPLSPDSGSPSPDSGSASPVEEEDVGSSEK	AT[79.9663]AQPPAPLSPDSGSPSPDSGSASPVEEEDVGSSEK	R	L	15	50	36	3	2T(79.9663)	sp|O95361|TRI16_HUMAN	O95361	TRI16_HUMAN	TRIM16	Tripartite motif-containing protein 16			2	1824903	MS/MS	STY:79.9663@AT(0.1243)AQPPAPLS(0.1243)PDS(0.1243)GS(0.1243)PS(0.1243)PDS(0.1243)GS(0.1243)AS(0.1243)PVEEEDVGS(0.0028)S(0.0028)EK;
ATNESEDEIPQLVPIGK	AT[79.9663]NESEDEIPQLVPIGK	K	K	137	153	17	2	2T(79.9663)	sp|O76021-2|RL1D1_HUMAN	O76021-2	RL1D1_HUMAN	RSL1D1	Isoform 2 of Ribosomal L1 domain-containing protein 1		sp|O76021|RL1D1_HUMAN	3	1.893455E7	MS/MS	STY:79.9663@AT(0.5000)NES(0.5000)EDEIPQLVPIGK;
ATSNVFAMFDQSQIQEFK	AT[79.9663]SNVFAM[15.9949]FDQSQIQEFK	R	E	18	35	18	2,3	2T(79.9663),8M(15.9949)	sp|O14950|ML12B_HUMAN	O14950	ML12B_HUMAN	MYL12B	Myosin regulatory light chain 12B	MYL12A, MYL9	sp|P19105|ML12A_HUMAN, sp|P24844-2|MYL9_HUMAN, sp|P24844|MYL9_HUMAN	3	2388246	MS/MS	STY:79.9663@AT(0.8824)S(0.0829)NVFAMFDQS(0.0347)QIQEFK;M:15.9949@ATSNVFAM(1.0000)FDQSQIQEFK;
ATSSSSGSLSATGR	AT[79.9663]SSSSGSLSATGR	R	L	417	430	14	2	2T(79.9663)	sp|Q03252|LMNB2_HUMAN	Q03252	LMNB2_HUMAN	LMNB2	Lamin-B2			2	817170	MS/MS	STY:79.9663@AT(0.3201)S(0.3201)S(0.3201)S(0.0079)S(0.0079)GS(0.0079)LS(0.0079)AT(0.0079)GR;
ATVTPSPVK	AT[79.9663]VTPSPVK	K	G	176	184	9	2	2T(79.9663)	sp|Q9H1E3|NUCKS_HUMAN	Q9H1E3	NUCKS_HUMAN	NUCKS1	Nuclear ubiquitous casein and cyclin-dependent kinase substrate 1		sp|Q9H1E3-2|NUCKS_HUMAN	4	3.1492676E7	MS/MS	STY:79.9663@AT(0.4901)VT(0.4901)PS(0.0198)PVK;
ATVTPSPVK	AT[79.9663]VTPS[79.9663]PVK	K	G	176	184	9	2	2T(79.9663),6S(79.9663)	sp|Q9H1E3|NUCKS_HUMAN	Q9H1E3	NUCKS_HUMAN	NUCKS1	Nuclear ubiquitous casein and cyclin-dependent kinase substrate 1		sp|Q9H1E3-2|NUCKS_HUMAN	1	8768595	MS/MS	STY:79.9663@AT(0.6576)VT(0.6576)PS(0.6849)PVK;
ATVTPSPVK	AT[79.9663]VT[79.9663]PSPVK	K	G	176	184	9	2	2T(79.9663),4T(79.9663)	sp|Q9H1E3|NUCKS_HUMAN	Q9H1E3	NUCKS_HUMAN	NUCKS1	Nuclear ubiquitous casein and cyclin-dependent kinase substrate 1		sp|Q9H1E3-2|NUCKS_HUMAN	2	8754023	MS/MS	STY:79.9663@AT(0.6667)VT(0.6667)PS(0.6667)PVK;
AVPMAPAPASPGSSNDSSAR	AVPMAPAPASPGSSNDS[79.9663]SAR	K	S	724	743	20	2	17S(79.9663)	sp|Q66K74-2|MAP1S_HUMAN	Q66K74-2	MAP1S_HUMAN	MAP1S	Isoform 2 of Microtubule-associated protein 1S		sp|Q66K74|MAP1S_HUMAN	1	1.96504e+06	MS/MS	STY:79.9663@AVPMAPAPAS(0.0468)PGS(0.0468)S(0.0468)NDS(0.4298)S(0.4298)AR;
AVPMAPAPASPGSSNDSSAR	AVPMAPAPASPGS[79.9663]SNDSSAR	K	S	724	743	20	2	13S(79.9663)	sp|Q66K74-2|MAP1S_HUMAN	Q66K74-2	MAP1S_HUMAN	MAP1S	Isoform 2 of Microtubule-associated protein 1S		sp|Q66K74|MAP1S_HUMAN	1	1.96504e+06	MS/MS	STY:79.9663@AVPMAPAPAS(0.0678)PGS(0.2330)S(0.2330)NDS(0.2330)S(0.2330)AR;
AVTIANSPSK	AVT[79.9663]IANSPSK	K	P	197	206	10	2	3T(79.9663)	sp|Q8NEF9|SRFB1_HUMAN	Q8NEF9	SRFB1_HUMAN	SRFBP1	Serum response factor-binding protein 1			2	835820	MS/MS	STY:79.9663@AVT(0.6670)IANS(0.1665)PS(0.1665)K;
AYLGYQAVPSGSSGSLSTSSSSSPPGTPSPADAK	AY[79.9663]LGYQAVPSGSSGSLSTSSSSSPPGTPSPADAK	R	A	186	219	34	3	2Y(79.9663)	sp|P17676-2|CEBPB_HUMAN	P17676-2	CEBPB_HUMAN	CEBPB	Isoform 2 of CCAAT/enhancer-binding protein beta		sp|P17676-3|CEBPB_HUMAN, sp|P17676|CEBPB_HUMAN	1	3.81053e+06	MS/MS	STY:79.9663@AY(0.1196)LGY(0.1196)QAVPS(0.1196)GS(0.1196)S(0.1196)GS(0.1196)LS(0.0021)T(0.0021)S(0.0021)S(0.0021)S(0.0554)S(0.0554)S(0.1129)PPGT(0.0252)PS(0.0252)PADAK;
CGSGPVHISGQHLVAVEEDAESEDEEEEDVK	C[57.0215]GSGPVHISGQHLVAVEEDAES[79.9663]EDEEEEDVK	K	L	104	134	31	3,4	1C(57.0215),22S(79.9663)	sp|P06748-2|NPM_HUMAN	P06748-2	NPM_HUMAN	NPM1	Isoform 2 of Nucleophosmin		sp|P06748-3|NPM_HUMAN, sp|P06748|NPM_HUMAN	24	1.76147488E8	MS/MS	STY:79.9663@CGS(0.0311)GPVHIS(0.0311)GQHLVAVEEDAES(0.9378)EDEEEEDVK;
CGSGPVHISGQHLVAVEEDAESEDEEEEDVK	C[57.0215]GSGPVHIS[79.9663]GQHLVAVEEDAESEDEEEEDVK	K	L	104	134	31	3	1C(57.0215),9S(79.9663)	sp|P06748-2|NPM_HUMAN	P06748-2	NPM_HUMAN	NPM1	Isoform 2 of Nucleophosmin		sp|P06748-3|NPM_HUMAN, sp|P06748|NPM_HUMAN	1	1.28676832E8	MS/MS	STY:79.9663@CGS(0.0746)GPVHIS(0.5852)GQHLVAVEEDAES(0.3402)EDEEEEDVK;
CGSGPVHISGQHLVAVEEDAESEDEEEEDVK	C[57.0215]GS[79.9663]GPVHISGQHLVAVEEDAESEDEEEEDVK	K	L	104	134	31	3,4	1C(57.0215),3S(79.9663)	sp|P06748-2|NPM_HUMAN	P06748-2	NPM_HUMAN	NPM1	Isoform 2 of Nucleophosmin		sp|P06748-3|NPM_HUMAN, sp|P06748|NPM_HUMAN	3	0	MS/MS	STY:79.9663@CGS(0.4518)GPVHIS(0.4518)GQHLVAVEEDAES(0.0963)EDEEEEDVK;
CQTAEADSESDHEVPEPESEMK	C[57.0215]QTAEADS[79.9663]ES[79.9663]DHEVPEPESEMK	R	M	966	987	22	3	10S(79.9663),1C(57.0215),8S(79.9663)	sp|Q9BPX3|CND3_HUMAN	Q9BPX3	CND3_HUMAN	NCAPG	Condensin complex subunit 3			1	4959909	MS/MS	STY:79.9663@CQT(0.4201)AEADS(0.5266)ES(0.5266)DHEVPEPES(0.5266)EMK;
CQTAEADSESDHEVPEPESEMK	C[57.0215]QT[79.9663]AEADSESDHEVPEPES[79.9663]EMK	R	M	966	987	22	3	19S(79.9663),1C(57.0215),3T(79.9663)	sp|Q9BPX3|CND3_HUMAN	Q9BPX3	CND3_HUMAN	NCAPG	Condensin complex subunit 3			1	0	MS/MS	STY:79.9663@CQT(0.4904)AEADS(0.4904)ES(0.4904)DHEVPEPES(0.5287)EMK;
CQTAEADSESDHEVPEPESEMK	C[57.0215]QT[79.9663]AEADS[79.9663]ESDHEVPEPESEMK	R	M	966	987	22	3	1C(57.0215),3T(79.9663),8S(79.9663)	sp|Q9BPX3|CND3_HUMAN	Q9BPX3	CND3_HUMAN	NCAPG	Condensin complex subunit 3			3	4959909	MS/MS	STY:79.9663@CQT(0.6243)AEADS(0.6243)ES(0.6243)DHEVPEPES(0.1270)EMK;
CQTAEADSESDHEVPEPESEMK	C[57.0215]QT[79.9663]AEADS[79.9663]ESDHEVPEPESEM[15.9949]K	R	M	966	987	22	3	1C(57.0215),21M(15.9949),3T(79.9663),8S(79.9663)	sp|Q9BPX3|CND3_HUMAN	Q9BPX3	CND3_HUMAN	NCAPG	Condensin complex subunit 3			1	777187	MS/MS	STY:79.9663@CQT(0.5000)AEADS(0.5000)ES(0.5000)DHEVPEPES(0.5000)EMK;M:15.9949@CQTAEADSESDHEVPEPESEM(1.0000)K;
CSVSLSNVEAR	C[57.0215]S[79.9663]VS[79.9663]LSNVEAR	R	R	726	736	11	2	1C(57.0215),2S(79.9663),4S(79.9663)	sp|P47712|PA24A_HUMAN	P47712	PA24A_HUMAN	PLA2G4A	Cytosolic phospholipase A2			2	1186122	MS/MS	STY:79.9663@CS(0.6838)VS(0.6581)LS(0.6581)NVEAR;
CWRVTSSVPLPSGSTSSPGR	C[57.0215]WRVT[79.9663]S[79.9663]SVPLPSGSTSSPGR	R	G	295	314	20	3	1C(57.0215),5T(79.9663),6S(79.9663)	sp|Q15036-2|SNX17_HUMAN	Q15036-2	SNX17_HUMAN	SNX17	Isoform 2 of Sorting nexin-17		sp|Q15036|SNX17_HUMAN	1	0	MS/MS	STY:79.9663@CWRVT(0.5423)S(0.5423)S(0.5423)VPLPS(0.1035)GS(0.0674)T(0.0674)S(0.0674)S(0.0674)PGR;
DAHDVSPTSTDTEAQLTVER	DAHDVS[79.9663]PTSTDTEAQLTVER	R	Q	189	208	20	3	6S(79.9663)	sp|Q8IVF2-3|AHNK2_HUMAN	Q8IVF2-3	AHNK2_HUMAN	AHNAK2	Isoform 3 of Protein AHNAK2		sp|Q8IVF2|AHNK2_HUMAN	3	3.20213e+06	MS/MS	STY:79.9663@DAHDVS(0.5618)PT(0.0374)S(0.0374)T(0.0374)DT(0.3116)EAQLT(0.0145)VER;
DALGDSLQVPVSPSSTTSSR	DALGDS[79.9663]LQVPVSPSSTTSSR	R	C	372	391	20	2	6S(79.9663)	sp|Q9Y2D5-4|AKAP2_HUMAN	Q9Y2D5-4	AKAP2_HUMAN	AKAP2	Isoform 3 of A-kinase anchor protein 2		sp|Q9Y2D5-5|AKAP2_HUMAN, sp|Q9Y2D5-6|AKAP2_HUMAN, sp|Q9Y2D5-7|AKAP2_HUMAN, sp|Q9Y2D5|AKAP2_HUMAN	1	4750731	MS/MS	STY:79.9663@DALGDS(0.3272)LQVPVS(0.3272)PS(0.0157)S(0.0157)T(0.0157)T(0.0995)S(0.0995)S(0.0995)R;
DAPTSPASVASSSSTPSSK	DAPT[79.9663]SPASVASSSSTPSSK	K	T	282	300	19	2	4T(79.9663)	sp|Q04726-2|TLE3_HUMAN	Q04726-2	TLE3_HUMAN	TLE3	Isoform 2 of Transducin-like enhancer protein 3		sp|Q04726-3|TLE3_HUMAN, sp|Q04726-4|TLE3_HUMAN, sp|Q04726-5|TLE3_HUMAN, sp|Q04726-6|TLE3_HUMAN, sp|Q04726-7|TLE3_HUMAN, sp|Q04726|TLE3_HUMAN	4	6.97981e+06	MS/MS	STY:79.9663@DAPT(0.4507)S(0.4507)PAS(0.0061)VAS(0.0058)S(0.0085)S(0.0124)S(0.0124)T(0.0178)PS(0.0178)S(0.0178)K;
DAQRLSPIPEEVPK	DAQRLS[79.9663]PIPEEVPK	K	S	568	581	14	2	6S(79.9663)	sp|Q96T23-2|RSF1_HUMAN	Q96T23-2	RSF1_HUMAN	RSF1	Isoform 2 of Remodeling and spacing factor 1		sp|Q96T23-3|RSF1_HUMAN, sp|Q96T23|RSF1_HUMAN	1	2.52526e+06	MS/MS	STY:79.9663@DAQRLS(1.0000)PIPEEVPK;
DCNESTDNDELEDEPEEPFYR	DC[57.0215]NES[79.9663]T[79.9663]DNDELEDEPEEPFYR	K	Y	351	371	21	3	2C(57.0215),5S(79.9663),6T(79.9663)	sp|Q9Y2K1-2|ZBTB1_HUMAN	Q9Y2K1-2	ZBTB1_HUMAN	ZBTB1	Isoform 2 of Zinc finger and BTB domain-containing protein 1		sp|Q9Y2K1|ZBTB1_HUMAN	1	0	MS/MS	STY:79.9663@DCNES(0.8788)T(0.8788)DNDELEDEPEEPFY(0.2425)R;
DDDAYKTEDSDDIHFEPVVQMPEK	DDDAY[79.9663]KT[79.9663]EDSDDIHFEPVVQMPEK	K	V	1999	2022	24	3	5Y(79.9663),7T(79.9663)	sp|P49792|RBP2_HUMAN	P49792	RBP2_HUMAN	RANBP2	E3 SUMO-protein ligase RanBP2	RGPD3, RGPD4, RGPD5, RGPD8	sp|A6NKT7|RGPD3_HUMAN, sp|O14715|RGPD8_HUMAN, sp|Q7Z3J3|RGPD4_HUMAN, sp|Q99666|RGPD5_HUMAN	1	1.17653e+06	MS/MS	STY:79.9663@DDDAY(0.6667)KT(0.6667)EDS(0.6667)DDIHFEPVVQMPEK;
DDDDIDLFGSDDEEESEEAK	DDDDIDLFGSDDEEES[79.9663]EEAK	K	R	97	116	20	2	16S(79.9663)	sp|P24534|EF1B_HUMAN	P24534	EF1B_HUMAN	EEF1B2	Elongation factor 1-beta			2	2.92459264E8	MS/MS	STY:79.9663@DDDDIDLFGS(0.4717)DDEEES(0.5283)EEAK;
DDDDIDLFGSDDEEESEEAK	DDDDIDLFGS[79.9663]DDEEESEEAK	K	R	97	116	20	2,3	10S(79.9663)	sp|P24534|EF1B_HUMAN	P24534	EF1B_HUMAN	EEF1B2	Elongation factor 1-beta			18	3.21583104E8	MS/MS	STY:79.9663@DDDDIDLFGS(0.9445)DDEEES(0.0555)EEAK;
DDEAHLQEDQGEEECFHDCSASFEEEPGADK	DDEAHLQEDQGEEEC[57.0215]FHDC[57.0215]S[79.9663]AS[79.9663]FEEEPGADK	R	V	48	78	31	3	15C(57.0215),19C(57.0215),20S(79.9663),22S(79.9663)	sp|Q99614|TTC1_HUMAN	Q99614	TTC1_HUMAN	TTC1	Tetratricopeptide repeat protein 1			2	2.00669e+06	MS/MS	STY:79.9663@DDEAHLQEDQGEEECFHDCS(1.0000)AS(1.0000)FEEEPGADK;
DDEEKPKIEDVGSDEEDDSGK	DDEEKPKIEDVGSDEEDDS[79.9663]GK	K	D	243	263	21	3	19S(79.9663)	sp|P08238|HS90B_HUMAN	P08238	HS90B_HUMAN	HSP90AB1	Heat shock protein HSP 90-beta	HSP90AB2P	sp|Q58FF8|H90B2_HUMAN	1	7949369	MS/MS	STY:79.9663@DDEEKPKIEDVGS(0.1331)DEEDDS(0.8669)GK;
DDEEKPKIEDVGSDEEDDSGK	DDEEKPKIEDVGS[79.9663]DEEDDSGK	K	D	243	263	21	3	13S(79.9663)	sp|P08238|HS90B_HUMAN	P08238	HS90B_HUMAN	HSP90AB1	Heat shock protein HSP 90-beta	HSP90AB2P	sp|Q58FF8|H90B2_HUMAN	2	7949369	MS/MS	STY:79.9663@DDEEKPKIEDVGS(0.5000)DEEDDS(0.5000)GK;
DDGDEEGLLTHSEEELEHSQDTDADDGALQ	DDGDEEGLLTHS[79.9663]EEELEHS[79.9663]QDTDADDGALQ	R	-	261	290	30	3	12S(79.9663),19S(79.9663)	sp|Q9UKM9-2|RALY_HUMAN	Q9UKM9-2	RALY_HUMAN	RALY	Isoform 1 of RNA-binding protein Raly		sp|Q9UKM9|RALY_HUMAN	1	7918717	MS/MS	STY:79.9663@DDGDEEGLLT(0.4418)HS(0.5194)EEELEHS(0.5194)QDT(0.5194)DADDGALQ;
DDGDEEGLLTHSEEELEHSQDTDADDGALQ	DDGDEEGLLT[79.9663]HS[79.9663]EEELEHS[79.9663]QDTDADDGALQ	R	-	261	290	30	3	10T(79.9663),12S(79.9663),19S(79.9663)	sp|Q9UKM9-2|RALY_HUMAN	Q9UKM9-2	RALY_HUMAN	RALY	Isoform 1 of RNA-binding protein Raly		sp|Q9UKM9|RALY_HUMAN	1	0	MS/MS	STY:79.9663@DDGDEEGLLT(0.7500)HS(0.7500)EEELEHS(0.7500)QDT(0.7500)DADDGALQ;
DDSTHESLSQESESEEDGIHVDSQK	DDSTHESLSQESES[79.9663]EEDGIHVDS[79.9663]QK	K	A	108	132	25	3	14S(79.9663),23S(79.9663)	sp|Q9H6T3-2|RPAP3_HUMAN	Q9H6T3-2	RPAP3_HUMAN	RPAP3	Isoform 2 of RNA polymerase II-associated protein 3		sp|Q9H6T3|RPAP3_HUMAN	1	5.30402e+06	MS/MS	STY:79.9663@DDS(0.3004)T(0.3004)HES(0.3004)LS(0.3004)QES(0.0319)ES(0.3832)EEDGIHVDS(0.3832)QK;
DDSTHESLSQESESEEDGIHVDSQK	DDSTHESLS[79.9663]QES[79.9663]ES[79.9663]EEDGIHVDSQK	K	A	108	132	25	3	12S(79.9663),14S(79.9663),9S(79.9663)	sp|Q9H6T3-2|RPAP3_HUMAN	Q9H6T3-2	RPAP3_HUMAN	RPAP3	Isoform 2 of RNA polymerase II-associated protein 3		sp|Q9H6T3|RPAP3_HUMAN	1	1.4369822E7	MS/MS	STY:79.9663@DDS(0.0558)T(0.0558)HES(0.0558)LS(0.9293)QES(0.9293)ES(0.9293)EEDGIHVDS(0.0447)QK;
DDSHSAEDSEDEK	DDS[79.9663]HS[79.9663]AEDSEDEK	K	E	71	83	13	2	3S(79.9663),5S(79.9663)	sp|Q9H1E3|NUCKS_HUMAN	Q9H1E3	NUCKS_HUMAN	NUCKS1	Nuclear ubiquitous casein and cyclin-dependent kinase substrate 1		sp|Q9H1E3-2|NUCKS_HUMAN	1	0	MS/MS	STY:79.9663@DDS(0.6667)HS(0.6667)AEDS(0.6667)EDEK;
DDSHSAEDSEDEKEDHK	DDS[79.9663]HS[79.9663]AEDSEDEKEDHK	K	N	71	87	17	3	3S(79.9663),5S(79.9663)	sp|Q9H1E3|NUCKS_HUMAN	Q9H1E3	NUCKS_HUMAN	NUCKS1	Nuclear ubiquitous casein and cyclin-dependent kinase substrate 1		sp|Q9H1E3-2|NUCKS_HUMAN	3	2.8654632E7	MS/MS	STY:79.9663@DDS(0.6842)HS(0.6579)AEDS(0.6579)EDEKEDHK;
DDSNEEENKDSLVDDEEEK	DDS[79.9663]NEEENKDS[79.9663]LVDDEEEK	K	E	249	267	19	3	11S(79.9663),3S(79.9663)	sp|Q9H1E5|TMX4_HUMAN	Q9H1E5	TMX4_HUMAN	TMX4	Thioredoxin-related transmembrane protein 4			1	781184	MS/MS	STY:79.9663@DDS(1.0000)NEEENKDS(1.0000)LVDDEEEK;
DDSTHESLSQESESEEDGIHVDSQK	DDS[79.9663]T[79.9663]HESLSQESESEEDGIHVDSQK	K	A	108	132	25	3	3S(79.9663),4T(79.9663)	sp|Q9H6T3-2|RPAP3_HUMAN	Q9H6T3-2	RPAP3_HUMAN	RPAP3	Isoform 2 of RNA polymerase II-associated protein 3		sp|Q9H6T3|RPAP3_HUMAN	2	5.30402e+06	MS/MS	STY:79.9663@DDS(0.3218)T(0.3218)HES(0.3218)LS(0.3218)QES(0.3218)ES(0.3218)EEDGIHVDS(0.0695)QK;
DDSTHESLSQESESEEDGIHVDSQK	DDS[79.9663]T[79.9663]HES[79.9663]LSQESESEEDGIHVDSQK	K	A	108	132	25	3	3S(79.9663),4T(79.9663),7S(79.9663)	sp|Q9H6T3-2|RPAP3_HUMAN	Q9H6T3-2	RPAP3_HUMAN	RPAP3	Isoform 2 of RNA polymerase II-associated protein 3		sp|Q9H6T3|RPAP3_HUMAN	3	1.4369822E7	MS/MS	STY:79.9663@DDS(0.5212)T(0.5212)HES(0.5212)LS(0.5212)QES(0.5212)ES(0.2790)EEDGIHVDS(0.1148)QK;
DEDQVHIIEHDQLSFSSITDQAAGMK	DEDQVHIIEHDQLS[79.9663]FS[79.9663]SITDQAAGMK	K	E	287	312	26	3	14S(79.9663),16S(79.9663)	sp|O00180|KCNK1_HUMAN	O00180	KCNK1_HUMAN	KCNK1	Potassium channel subfamily K member 1			1	5.66607e+06	MS/MS	STY:79.9663@DEDQVHIIEHDQLS(0.5000)FS(0.5000)S(0.5000)IT(0.5000)DQAAGMK;
DEILPTTPISEQK	DEILPTTPIS[79.9663]EQK	K	G	231	243	13	2	10S(79.9663)	sp|P23396-2|RS3_HUMAN	P23396-2	RS3_HUMAN	RPS3	Isoform 2 of Small ribosomal subunit protein uS3		sp|P23396|RS3_HUMAN	1	6642730	MS/MS	STY:79.9663@DEILPT(0.1937)T(0.1937)PIS(0.6126)EQK;
DEILPTTPISEQK	DEILPT[79.9663]TPISEQK	K	G	231	243	13	2	6T(79.9663)	sp|P23396-2|RS3_HUMAN	P23396-2	RS3_HUMAN	RPS3	Isoform 2 of Small ribosomal subunit protein uS3		sp|P23396|RS3_HUMAN	4	6642730	MS/MS	STY:79.9663@DEILPT(0.4902)T(0.4902)PIS(0.0197)EQK;
DELHIVEAEAMNYEGSPIK	DELHIVEAEAMNYEGS[79.9663]PIK	K	V	55	73	19	3	16S(79.9663)	sp|P06748-2|NPM_HUMAN	P06748-2	NPM_HUMAN	NPM1	Isoform 2 of Nucleophosmin		sp|P06748-3|NPM_HUMAN, sp|P06748|NPM_HUMAN	5	1.3744999E7	MS/MS	STY:79.9663@DELHIVEAEAMNY(0.0654)EGS(0.9346)PIK;
DELHIVEAEAMNYEGSPIK	DELHIVEAEAMNY[79.9663]EGSPIK	K	V	55	73	19	2	13Y(79.9663)	sp|P06748-2|NPM_HUMAN	P06748-2	NPM_HUMAN	NPM1	Isoform 2 of Nucleophosmin		sp|P06748-3|NPM_HUMAN, sp|P06748|NPM_HUMAN	2	9351266	MS/MS	STY:79.9663@DELHIVEAEAMNY(0.7563)EGS(0.2437)PIK;
DELHIVEAEAMNYEGSPIK	DELHIVEAEAM[15.9949]NYEGS[79.9663]PIK	K	V	55	73	19	3	11M(15.9949),16S(79.9663)	sp|P06748-2|NPM_HUMAN	P06748-2	NPM_HUMAN	NPM1	Isoform 2 of Nucleophosmin		sp|P06748-3|NPM_HUMAN, sp|P06748|NPM_HUMAN	1	2813320	MS/MS	STY:79.9663@DELHIVEAEAMNY(0.0666)EGS(0.9334)PIK;M:15.9949@DELHIVEAEAM(1.0000)NYEGSPIK;
DELHIVEAEAMNYEGSPIK	DELHIVEAEAM[15.9949]NY[79.9663]EGSPIK	K	V	55	73	19	3	11M(15.9949),13Y(79.9663)	sp|P06748-2|NPM_HUMAN	P06748-2	NPM_HUMAN	NPM1	Isoform 2 of Nucleophosmin		sp|P06748-3|NPM_HUMAN, sp|P06748|NPM_HUMAN	2	3.65402e+06	MS/MS	STY:79.9663@DELHIVEAEAMNY(0.5000)EGS(0.5000)PIK;M:15.9949@DELHIVEAEAM(1.0000)NYEGSPIK;
DELNEELIQEESSEDEGEYEEVR	DELNEELIQEES[79.9663]S[79.9663]EDEGEYEEVR	R	K	715	737	23	3	12S(79.9663),13S(79.9663)	sp|O60524-3|NEMF_HUMAN	O60524-3	NEMF_HUMAN	NEMF	Isoform 3 of Ribosome quality control complex subunit NEMF		sp|O60524-4|NEMF_HUMAN, sp|O60524-5|NEMF_HUMAN, sp|O60524|NEMF_HUMAN	5	1.4708E7	MS/MS	STY:79.9663@DELNEELIQEES(0.9441)S(0.9441)EDEGEY(0.1119)EEVR;
DELTDLDQSNVTEETPEGEEHHPVADTENK	DELTDLDQSNVTEETPEGEEHHPVADT[79.9663]ENK	K	E	229	258	30	3	27T(79.9663)	sp|Q8NC51-3|SERB1_HUMAN	Q8NC51-3	SERB1_HUMAN	SERBP1	Isoform 3 of SERPINE1 mRNA-binding protein 1		sp|Q8NC51-4|SERB1_HUMAN	1	4337376	MS/MS	STY:79.9663@DELT(0.1197)DLDQS(0.1197)NVT(0.1197)EET(0.0162)PEGEEHHPVADT(0.6249)ENK;
DELTDLDQSNVTEETPEGEEHHPVADTENK	DELTDLDQSNVT[79.9663]EETPEGEEHHPVADTENK	K	E	229	258	30	3	12T(79.9663)	sp|Q8NC51-3|SERB1_HUMAN	Q8NC51-3	SERB1_HUMAN	SERBP1	Isoform 3 of SERPINE1 mRNA-binding protein 1		sp|Q8NC51-4|SERB1_HUMAN	1	5.72918e+06	MS/MS	STY:79.9663@DELT(0.2712)DLDQS(0.0419)NVT(0.3121)EET(0.3121)PEGEEHHPVADT(0.0628)ENK;
DELTDLDQSNVTEETPEGEEHHPVADTENK	DELTDLDQS[79.9663]NVTEETPEGEEHHPVADTENK	K	E	229	258	30	3	9S(79.9663)	sp|Q8NC51-3|SERB1_HUMAN	Q8NC51-3	SERB1_HUMAN	SERBP1	Isoform 3 of SERPINE1 mRNA-binding protein 1		sp|Q8NC51-4|SERB1_HUMAN	1	4337376	MS/MS	STY:79.9663@DELT(0.2338)DLDQS(0.2504)NVT(0.2504)EET(0.2504)PEGEEHHPVADT(0.0149)ENK;
DELTDLDQSNVTEETPEGEEHHPVADTENK	DELT[79.9663]DLDQSNVTEETPEGEEHHPVADTENK	K	E	229	258	30	3,4	4T(79.9663)	sp|Q8NC51-3|SERB1_HUMAN	Q8NC51-3	SERB1_HUMAN	SERBP1	Isoform 3 of SERPINE1 mRNA-binding protein 1		sp|Q8NC51-4|SERB1_HUMAN	3	8197474	MS/MS	STY:79.9663@DELT(0.8275)DLDQS(0.0431)NVT(0.0431)EET(0.0431)PEGEEHHPVADT(0.0431)ENK;
DETFGEYSDNEEK	DET[79.9663]FGEYSDNEEK	K	A	1170	1182	13	2	3T(79.9663)	sp|P32004-2|L1CAM_HUMAN	P32004-2	L1CAM_HUMAN	L1CAM	Isoform 2 of Neural cell adhesion molecule L1		sp|P32004-3|L1CAM_HUMAN	1	0	MS/MS	STY:79.9663@DET(0.7424)FGEY(0.1769)S(0.0806)DNEEK;
DEVFHTDQDDPSSSDDEGMPYTR	DEVFHTDQDDPSSSDDEGMPY[79.9663]T[79.9663]R	R	P	459	481	23	3	21Y(79.9663),22T(79.9663)	sp|Q5JSH3-2|WDR44_HUMAN	Q5JSH3-2	WDR44_HUMAN	WDR44	Isoform 2 of WD repeat-containing protein 44		sp|Q5JSH3-4|WDR44_HUMAN, sp|Q5JSH3|WDR44_HUMAN	1	2.86238e+06	MS/MS	STY:79.9663@DEVFHT(0.0525)DQDDPS(0.1075)S(0.1075)S(0.1075)DDEGMPY(0.8125)T(0.8125)R;
DEVFHTDQDDPSSSDDEGMPYTR	DEVFHTDQDDPS[79.9663]SSDDEGMPY[79.9663]T[79.9663]R	R	P	459	481	23	3	12S(79.9663),21Y(79.9663),22T(79.9663)	sp|Q5JSH3-2|WDR44_HUMAN	Q5JSH3-2	WDR44_HUMAN	WDR44	Isoform 2 of WD repeat-containing protein 44		sp|Q5JSH3-4|WDR44_HUMAN, sp|Q5JSH3|WDR44_HUMAN	2	5.83921e+06	MS/MS	STY:79.9663@DEVFHT(0.0412)DQDDPS(0.5730)S(0.5730)S(0.5730)DDEGMPY(0.6199)T(0.6199)R;
DEVFHTDQDDPSSSDDEGMPYTR	DEVFHTDQDDPS[79.9663]S[79.9663]SDDEGMPYTR	R	P	459	481	23	3	12S(79.9663),13S(79.9663)	sp|Q5JSH3-2|WDR44_HUMAN	Q5JSH3-2	WDR44_HUMAN	WDR44	Isoform 2 of WD repeat-containing protein 44		sp|Q5JSH3-4|WDR44_HUMAN, sp|Q5JSH3|WDR44_HUMAN	2	4007233	MS/MS	STY:79.9663@DEVFHT(0.0354)DQDDPS(0.5738)S(0.5738)S(0.5738)DDEGMPY(0.1215)T(0.1215)R;
DEVFHTDQDDPSSSDDEGMPYTR	DEVFHTDQDDPS[79.9663]S[79.9663]S[79.9663]DDEGMPYTR	R	P	459	481	23	3	12S(79.9663),13S(79.9663),14S(79.9663)	sp|Q5JSH3-2|WDR44_HUMAN	Q5JSH3-2	WDR44_HUMAN	WDR44	Isoform 2 of WD repeat-containing protein 44		sp|Q5JSH3-4|WDR44_HUMAN, sp|Q5JSH3|WDR44_HUMAN	1	0	MS/MS	STY:79.9663@DEVFHT(0.3943)DQDDPS(0.5211)S(0.5211)S(0.5211)DDEGMPY(0.5211)T(0.5211)R;
DEVFHTDQDDPSSSDDEGMPYTR	DEVFHT[79.9663]DQDDPSSSDDEGMPY[79.9663]T[79.9663]R	R	P	459	481	23	3	21Y(79.9663),22T(79.9663),6T(79.9663)	sp|Q5JSH3-2|WDR44_HUMAN	Q5JSH3-2	WDR44_HUMAN	WDR44	Isoform 2 of WD repeat-containing protein 44		sp|Q5JSH3-4|WDR44_HUMAN, sp|Q5JSH3|WDR44_HUMAN	1	0	MS/MS	STY:79.9663@DEVFHT(0.4881)DQDDPS(0.4881)S(0.4881)S(0.4881)DDEGMPY(0.5237)T(0.5237)R;
DEVFHTDQDDPSSSDDEGMPYTR	DEVFHT[79.9663]DQDDPS[79.9663]SSDDEGMPYTR	R	P	459	481	23	3	12S(79.9663),6T(79.9663)	sp|Q5JSH3-2|WDR44_HUMAN	Q5JSH3-2	WDR44_HUMAN	WDR44	Isoform 2 of WD repeat-containing protein 44		sp|Q5JSH3-4|WDR44_HUMAN, sp|Q5JSH3|WDR44_HUMAN	4	4007233	MS/MS	STY:79.9663@DEVFHT(0.4892)DQDDPS(0.4892)S(0.4892)S(0.4892)DDEGMPY(0.0216)T(0.0216)R;
DEVFHTDQDDPSSSDDEGMPYTR	DEVFHT[79.9663]DQDDPS[79.9663]S[79.9663]SDDEGMPYTR	R	P	459	481	23	3	12S(79.9663),13S(79.9663),6T(79.9663)	sp|Q5JSH3-2|WDR44_HUMAN	Q5JSH3-2	WDR44_HUMAN	WDR44	Isoform 2 of WD repeat-containing protein 44		sp|Q5JSH3-4|WDR44_HUMAN, sp|Q5JSH3|WDR44_HUMAN	3	2.7638e+06	MS/MS	STY:79.9663@DEVFHT(0.7030)DQDDPS(0.6530)S(0.6530)S(0.6530)DDEGMPY(0.1690)T(0.1690)R;
DFDIAEQNESSDEESLR	DFDIAEQNESS[79.9663]DEES[79.9663]LR	K	K	470	486	17	2	11S(79.9663),15S(79.9663)	sp|Q96KC8|DNJC1_HUMAN	Q96KC8	DNJC1_HUMAN	DNAJC1	DnaJ homolog subfamily C member 1			1	9529306	MS/MS	STY:79.9663@DFDIAEQNES(0.3250)S(0.8375)DEES(0.8375)LR;
DFDIAEQNESSDEESLR	DFDIAEQNES[79.9663]SDEESLR	K	K	470	486	17	2	10S(79.9663)	sp|Q96KC8|DNJC1_HUMAN	Q96KC8	DNJC1_HUMAN	DNAJC1	DnaJ homolog subfamily C member 1			1	0	MS/MS	STY:79.9663@DFDIAEQNES(0.3333)S(0.3333)DEES(0.3333)LR;
DFDIAEQNESSDEESLR	DFDIAEQNES[79.9663]S[79.9663]DEESLR	K	K	470	486	17	2	10S(79.9663),11S(79.9663)	sp|Q96KC8|DNJC1_HUMAN	Q96KC8	DNJC1_HUMAN	DNAJC1	DnaJ homolog subfamily C member 1			1	9529306	MS/MS	STY:79.9663@DFDIAEQNES(0.9135)S(0.9134)DEES(0.1731)LR;
DGDSYDPYDFSDTEEEMPQVHTPK	DGDSYDPYDFSDTEEEMPQVHT[79.9663]PK	K	T	746	769	24	3	22T(79.9663)	sp|P25205-2|MCM3_HUMAN	P25205-2	MCM3_HUMAN	MCM3	Isoform 2 of DNA replication licensing factor MCM3		sp|P25205|MCM3_HUMAN	1	2.5283e+06	MS/MS	STY:79.9663@DGDS(0.0264)Y(0.0264)DPY(0.0536)DFS(0.0536)DT(0.0536)EEEMPQVHT(0.7864)PK;
DGDSYDPYDFSDTEEEMPQVHTPK	DGDSYDPYDFSDTEEEM[15.9949]PQVHT[79.9663]PK	K	T	746	769	24	3	17M(15.9949),22T(79.9663)	sp|P25205-2|MCM3_HUMAN	P25205-2	MCM3_HUMAN	MCM3	Isoform 2 of DNA replication licensing factor MCM3		sp|P25205|MCM3_HUMAN	1	2.94656e+06	MS/MS	STY:79.9663@DGDS(0.0160)Y(0.0160)DPY(0.0307)DFS(0.0586)DT(0.0586)EEEMPQVHT(0.8202)PK;M:15.9949@DGDSYDPYDFSDTEEEM(1.0000)PQVHTPK;
DGDSYDPYDFSDTEEEMPQVHTPK	DGDSYDPYDFSDT[79.9663]EEEMPQVHT[79.9663]PK	K	T	746	769	24	3	13T(79.9663),22T(79.9663)	sp|P25205-2|MCM3_HUMAN	P25205-2	MCM3_HUMAN	MCM3	Isoform 2 of DNA replication licensing factor MCM3		sp|P25205|MCM3_HUMAN	1	1.3893776E7	MS/MS	STY:79.9663@DGDS(0.3331)Y(0.3331)DPY(0.2532)DFS(0.2532)DT(0.4057)EEEMPQVHT(0.4217)PK;
DGDSYDPYDFSDTEEEMPQVHTPK	DGDSYDPYDFSDT[79.9663]EEEM[15.9949]PQVHT[79.9663]PK	K	T	746	769	24	3	13T(79.9663),17M(15.9949),22T(79.9663)	sp|P25205-2|MCM3_HUMAN	P25205-2	MCM3_HUMAN	MCM3	Isoform 2 of DNA replication licensing factor MCM3		sp|P25205|MCM3_HUMAN	1	8858588	MS/MS	STY:79.9663@DGDS(0.0569)Y(0.0569)DPY(0.0569)DFS(0.0789)DT(0.8722)EEEMPQVHT(0.8781)PK;M:15.9949@DGDSYDPYDFSDTEEEM(1.0000)PQVHTPK;
DGDSYDPYDFSDTEEEMPQVHTPK	DGDSYDPYDFS[79.9663]DTEEEMPQVHT[79.9663]PK	K	T	746	769	24	3	11S(79.9663),22T(79.9663)	sp|P25205-2|MCM3_HUMAN	P25205-2	MCM3_HUMAN	MCM3	Isoform 2 of DNA replication licensing factor MCM3		sp|P25205|MCM3_HUMAN	1	5584066	MS/MS	STY:79.9663@DGDS(0.0704)Y(0.0704)DPY(0.0704)DFS(0.8080)DT(0.1640)EEEMPQVHT(0.8168)PK;
DGDSYDPYDFSDTEEEMPQVHTPK	DGDSYDPYDFS[79.9663]DTEEEM[15.9949]PQVHTPK	K	T	746	769	24	3	11S(79.9663),17M(15.9949)	sp|P25205-2|MCM3_HUMAN	P25205-2	MCM3_HUMAN	MCM3	Isoform 2 of DNA replication licensing factor MCM3		sp|P25205|MCM3_HUMAN	1	2.94656e+06	MS/MS	STY:79.9663@DGDS(0.0225)Y(0.0225)DPY(0.0225)DFS(0.4596)DT(0.0443)EEEMPQVHT(0.4285)PK;M:15.9949@DGDSYDPYDFSDTEEEM(1.0000)PQVHTPK;
DGDSYDPYDFSDTEEEMPQVHTPK	DGDSYDPYDFS[79.9663]DT[79.9663]EEEMPQVHT[79.9663]PK	K	T	746	769	24	3	11S(79.9663),13T(79.9663),22T(79.9663)	sp|P25205-2|MCM3_HUMAN	P25205-2	MCM3_HUMAN	MCM3	Isoform 2 of DNA replication licensing factor MCM3		sp|P25205|MCM3_HUMAN	1	1.8107664E7	MS/MS	STY:79.9663@DGDS(0.0753)Y(0.0753)DPY(0.1909)DFS(0.8853)DT(0.8853)EEEMPQVHT(0.8878)PK;
DGDSYDPYDFSDTEEEMPQVHTPK	DGDSYDPYDFS[79.9663]DT[79.9663]EEEM[15.9949]PQVHTPK	K	T	746	769	24	3	11S(79.9663),13T(79.9663),17M(15.9949)	sp|P25205-2|MCM3_HUMAN	P25205-2	MCM3_HUMAN	MCM3	Isoform 2 of DNA replication licensing factor MCM3		sp|P25205|MCM3_HUMAN	1	8858588	MS/MS	STY:79.9663@DGDS(0.2945)Y(0.2945)DPY(0.2945)DFS(0.3722)DT(0.3722)EEEMPQVHT(0.3722)PK;M:15.9949@DGDSYDPYDFSDTEEEM(1.0000)PQVHTPK;
DGDSYDPYDFSDTEEEMPQVHTPK	DGDSYDPY[79.9663]DFSDTEEEMPQVHTPK	K	T	746	769	24	3	8Y(79.9663)	sp|P25205-2|MCM3_HUMAN	P25205-2	MCM3_HUMAN	MCM3	Isoform 2 of DNA replication licensing factor MCM3		sp|P25205|MCM3_HUMAN	1	2.5283e+06	MS/MS	STY:79.9663@DGDS(0.0075)Y(0.0075)DPY(0.3202)DFS(0.3202)DT(0.3202)EEEMPQVHT(0.0243)PK;
DGDSYDPYDFSDTEEEMPQVHTPK	DGDSYDPY[79.9663]DFSDTEEEMPQVHT[79.9663]PK	K	T	746	769	24	3	22T(79.9663),8Y(79.9663)	sp|P25205-2|MCM3_HUMAN	P25205-2	MCM3_HUMAN	MCM3	Isoform 2 of DNA replication licensing factor MCM3		sp|P25205|MCM3_HUMAN	1	1.3893776E7	MS/MS	STY:79.9663@DGDS(0.0862)Y(0.2911)DPY(0.7347)DFS(0.0702)DT(0.0702)EEEMPQVHT(0.7475)PK;
DGDSYDPYDFSDTEEEMPQVHTPK	DGDSY[79.9663]DPYDFSDTEEEMPQVHT[79.9663]PK	K	T	746	769	24	3	22T(79.9663),5Y(79.9663)	sp|P25205-2|MCM3_HUMAN	P25205-2	MCM3_HUMAN	MCM3	Isoform 2 of DNA replication licensing factor MCM3		sp|P25205|MCM3_HUMAN	1	0	MS/MS	STY:79.9663@DGDS(0.0193)Y(0.5112)DPY(0.5042)DFS(0.2117)DT(0.1627)EEEMPQVHT(0.5909)PK;
DGDSYDPYDFSDTEEEMPQVHTPK	DGDSY[79.9663]DPY[79.9663]DFSDTEEEM[15.9949]PQVHTPK	K	T	746	769	24	3	17M(15.9949),5Y(79.9663),8Y(79.9663)	sp|P25205-2|MCM3_HUMAN	P25205-2	MCM3_HUMAN	MCM3	Isoform 2 of DNA replication licensing factor MCM3		sp|P25205|MCM3_HUMAN	1	2.05534e+06	MS/MS	STY:79.9663@DGDS(0.0438)Y(0.8148)DPY(0.8148)DFS(0.1151)DT(0.0843)EEEMPQVHT(0.1273)PK;M:15.9949@DGDSYDPYDFSDTEEEM(1.0000)PQVHTPK;
DGDSYDPYDFSDTEEEMPQVHTPK	DGDS[79.9663]YDPYDFSDTEEEMPQVHT[79.9663]PK	K	T	746	769	24	3	22T(79.9663),4S(79.9663)	sp|P25205-2|MCM3_HUMAN	P25205-2	MCM3_HUMAN	MCM3	Isoform 2 of DNA replication licensing factor MCM3		sp|P25205|MCM3_HUMAN	2	1.3893776E7	MS/MS	STY:79.9663@DGDS(0.3774)Y(0.3774)DPY(0.2718)DFS(0.2718)DT(0.2633)EEEMPQVHT(0.4383)PK;
DGDSYDPYDFSDTEEEMPQVHTPK	DGDS[79.9663]YDPYDFSDTEEEM[15.9949]PQVHT[79.9663]PK	K	T	746	769	24	3	17M(15.9949),22T(79.9663),4S(79.9663)	sp|P25205-2|MCM3_HUMAN	P25205-2	MCM3_HUMAN	MCM3	Isoform 2 of DNA replication licensing factor MCM3		sp|P25205|MCM3_HUMAN	2	8858588	MS/MS	STY:79.9663@DGDS(0.4677)Y(0.4677)DPY(0.4677)DFS(0.0282)DT(0.0237)EEEMPQVHT(0.5450)PK;M:15.9949@DGDSYDPYDFSDTEEEM(1.0000)PQVHTPK;
DGDSYDPYDFSDTEEEMPQVHTPK	DGDS[79.9663]YDPYDFSDT[79.9663]EEEMPQVHT[79.9663]PK	K	T	746	769	24	3	13T(79.9663),22T(79.9663),4S(79.9663)	sp|P25205-2|MCM3_HUMAN	P25205-2	MCM3_HUMAN	MCM3	Isoform 2 of DNA replication licensing factor MCM3		sp|P25205|MCM3_HUMAN	1	1.8107664E7	MS/MS	STY:79.9663@DGDS(0.4936)Y(0.4936)DPY(0.4936)DFS(0.4936)DT(0.5092)EEEMPQVHT(0.5165)PK;
DGDSYDPYDFSDTEEEMPQVHTPK	DGDS[79.9663]YDPY[79.9663]DFSDT[79.9663]EEEMPQVHTPK	K	T	746	769	24	3	13T(79.9663),4S(79.9663),8Y(79.9663)	sp|P25205-2|MCM3_HUMAN	P25205-2	MCM3_HUMAN	MCM3	Isoform 2 of DNA replication licensing factor MCM3		sp|P25205|MCM3_HUMAN	1	0	MS/MS	STY:79.9663@DGDS(0.6442)Y(0.6442)DPY(0.6934)DFS(0.2511)DT(0.6915)EEEMPQVHT(0.0756)PK;
DGDSYDPYDFSDTEEEMPQVHTPK	DGDS[79.9663]Y[79.9663]DPYDFSDTEEEMPQVHT[79.9663]PK	K	T	746	769	24	3	22T(79.9663),4S(79.9663),5Y(79.9663)	sp|P25205-2|MCM3_HUMAN	P25205-2	MCM3_HUMAN	MCM3	Isoform 2 of DNA replication licensing factor MCM3		sp|P25205|MCM3_HUMAN	1	1.8107664E7	MS/MS	STY:79.9663@DGDS(0.4944)Y(0.4944)DPY(0.4944)DFS(0.4944)DT(0.4944)EEEMPQVHT(0.5281)PK;
DGDSYDPYDFSDTEEEMPQVHTPK	DGDS[79.9663]Y[79.9663]DPYDFSDTEEEM[15.9949]PQVHTPK	K	T	746	769	24	3	17M(15.9949),4S(79.9663),5Y(79.9663)	sp|P25205-2|MCM3_HUMAN	P25205-2	MCM3_HUMAN	MCM3	Isoform 2 of DNA replication licensing factor MCM3		sp|P25205|MCM3_HUMAN	1	8858588	MS/MS	STY:79.9663@DGDS(0.5394)Y(0.5394)DPY(0.5394)DFS(0.1787)DT(0.1787)EEEMPQVHT(0.0245)PK;M:15.9949@DGDSYDPYDFSDTEEEM(1.0000)PQVHTPK;
DGGSGNSTIIVSR	DGGS[79.9663]GNSTIIVSR	R	S	2359	2371	13	2	4S(79.9663)	sp|Q7Z6Z7-2|HUWE1_HUMAN	Q7Z6Z7-2	HUWE1_HUMAN	HUWE1	Isoform 2 of E3 ubiquitin-protein ligase HUWE1		sp|Q7Z6Z7-3|HUWE1_HUMAN, sp|Q7Z6Z7|HUWE1_HUMAN	1	648340	MS/MS	STY:79.9663@DGGS(0.5099)GNS(0.0428)T(0.2236)IIVS(0.2236)R;
DGGSGNSTIIVSR	DGGS[79.9663]GNS[79.9663]TIIVSR	R	S	2359	2371	13	2	4S(79.9663),7S(79.9663)	sp|Q7Z6Z7-2|HUWE1_HUMAN	Q7Z6Z7-2	HUWE1_HUMAN	HUWE1	Isoform 2 of E3 ubiquitin-protein ligase HUWE1		sp|Q7Z6Z7-3|HUWE1_HUMAN, sp|Q7Z6Z7|HUWE1_HUMAN	1	1.73101e+06	MS/MS	STY:79.9663@DGGS(0.6500)GNS(0.6011)T(0.6011)IIVS(0.1478)R;
DGLNQTTIPVSPPSTTK	DGLNQTTIPVS[79.9663]PPSTTK	K	P	474	490	17	2	11S(79.9663)	sp|Q71RC2-2|LARP4_HUMAN	Q71RC2-2	LARP4_HUMAN	LARP4	Isoform 2 of La-related protein 4		sp|Q71RC2-3|LARP4_HUMAN, sp|Q71RC2-4|LARP4_HUMAN, sp|Q71RC2-5|LARP4_HUMAN, sp|Q71RC2-6|LARP4_HUMAN, sp|Q71RC2|LARP4_HUMAN	1	2.90216e+06	MS/MS	STY:79.9663@DGLNQT(0.0058)T(0.0058)IPVS(0.2471)PPS(0.2471)T(0.2471)T(0.2471)K;
DGLNQTTIPVSPPSTTK	DGLNQT[79.9663]TIPVSPPSTTK	K	P	474	490	17	2	6T(79.9663)	sp|Q71RC2-2|LARP4_HUMAN	Q71RC2-2	LARP4_HUMAN	LARP4	Isoform 2 of La-related protein 4		sp|Q71RC2-3|LARP4_HUMAN, sp|Q71RC2-4|LARP4_HUMAN, sp|Q71RC2-5|LARP4_HUMAN, sp|Q71RC2-6|LARP4_HUMAN, sp|Q71RC2|LARP4_HUMAN	2	2.90216e+06	MS/MS	STY:79.9663@DGLNQT(0.4236)T(0.4236)IPVS(0.0382)PPS(0.0382)T(0.0382)T(0.0382)K;
DGQDAIAQSPEK	DGQDAIAQS[79.9663]PEK	K	E	281	292	12	2	9S(79.9663)	sp|Q9NWH9|SLTM_HUMAN	Q9NWH9	SLTM_HUMAN	SLTM	SAFB-like transcription modulator			6	1.78767e+06	MS/MS	STY:79.9663@DGQDAIAQS(1.0000)PEK;
DGQVINETSQHHDDLE	DGQVINET[79.9663]SQHHDDLE	R	-	451	466	16	2,3	8T(79.9663)	sp|P08670|VIME_HUMAN	P08670	VIME_HUMAN	VIM	Vimentin			4	7430067	MS/MS	STY:79.9663@DGQVINET(0.5000)S(0.5000)QHHDDLE;
DHFGLEGDEESTMLEDSVSPK	DHFGLEGDEESTMLEDS[79.9663]VSPK	K	K	407	427	21	3	17S(79.9663)	sp|Q9Y490|TLN1_HUMAN	Q9Y490	TLN1_HUMAN	TLN1	Talin-1			1	1.32926e+06	MS/MS	STY:79.9663@DHFGLEGDEES(0.0430)T(0.0430)MLEDS(0.4570)VS(0.4570)PK;
DHFGLEGDEESTMLEDSVSPK	DHFGLEGDEESTM[15.9949]LEDS[79.9663]VSPK	K	K	407	427	21	3	13M(15.9949),17S(79.9663)	sp|Q9Y490|TLN1_HUMAN	Q9Y490	TLN1_HUMAN	TLN1	Talin-1			1	0	MS/MS	STY:79.9663@DHFGLEGDEES(0.0867)T(0.0867)MLEDS(0.4133)VS(0.4133)PK;M:15.9949@DHFGLEGDEESTM(1.0000)LEDSVSPK;
DHFYSDDDAIEADSEGDAEPCDK	DHFY[79.9663]SDDDAIEADS[79.9663]EGDAEPC[57.0215]DK	K	E	54	76	23	3	14S(79.9663),21C(57.0215),4Y(79.9663)	sp|Q9Y3B9|RRP15_HUMAN	Q9Y3B9	RRP15_HUMAN	RRP15	RRP15-like protein			4	5.54279e+06	MS/MS	STY:79.9663@DHFY(0.6577)S(0.6577)DDDAIEADS(0.6846)EGDAEPCDK;
DHFYSDDDAIEADSEGDAEPCDK	DHFY[79.9663]S[79.9663]DDDAIEADSEGDAEPC[57.0215]DK	K	E	54	76	23	3	21C(57.0215),4Y(79.9663),5S(79.9663)	sp|Q9Y3B9|RRP15_HUMAN	Q9Y3B9	RRP15_HUMAN	RRP15	RRP15-like protein			1	2.54783e+06	MS/MS	STY:79.9663@DHFY(0.6667)S(0.6667)DDDAIEADS(0.6667)EGDAEPCDK;
DHSPTPSVFNSDEER	DHS[79.9663]PTPSVFNSDEER	R	Y	416	430	15	2	3S(79.9663)	sp|Q6UN15-3|FIP1_HUMAN	Q6UN15-3	FIP1_HUMAN	FIP1L1	Isoform 3 of Pre-mRNA 3'-end-processing factor FIP1		sp|Q6UN15-5|FIP1_HUMAN, sp|Q6UN15|FIP1_HUMAN	1	2040437	MS/MS	STY:79.9663@DHS(0.2500)PT(0.2500)PS(0.2500)VFNS(0.2500)DEER;
DIDISSPEFK	DIDIS[79.9663]SPEFK	K	I	172	181	10	2	5S(79.9663)	sp|Q09666|AHNK_HUMAN	Q09666	AHNK_HUMAN	AHNAK	Neuroblast differentiation-associated protein AHNAK			2	4695766	MS/MS	STY:79.9663@DIDIS(0.5000)S(0.5000)PEFK;
DIEVLSEDTDYEEDEVTK	DIEVLS[79.9663]EDT[79.9663]DYEEDEVTK	K	K	699	716	18	2	6S(79.9663),9T(79.9663)	sp|Q4LE39-2|ARI4B_HUMAN	Q4LE39-2	ARI4B_HUMAN	ARID4B	Isoform 2 of AT-rich interactive domain-containing protein 4B		sp|Q4LE39-3|ARI4B_HUMAN, sp|Q4LE39-4|ARI4B_HUMAN, sp|Q4LE39|ARI4B_HUMAN	1	0	MS/MS	STY:79.9663@DIEVLS(0.5887)EDT(0.5468)DY(0.5468)EEDEVT(0.3178)K;
DIGSESTEDQAMEDIK	DIGS[79.9663]ES[79.9663]TEDQAMEDIK	K	Q	58	73	16	2	4S(79.9663),6S(79.9663)	sp|P02662|CASA1_BOVIN	P02662	CASA1_BOVIN	CSN1S1	Alpha-S1-casein			1	1.54885e+06	MS/MS	STY:79.9663@DIGS(0.6829)ES(0.6586)T(0.6586)EDQAMEDIK;
DIGSESTEDQAMEDIK	DIGS[79.9663]ES[79.9663]TEDQAM[15.9949]EDIK	K	Q	58	73	16	2	12M(15.9949),4S(79.9663),6S(79.9663)	sp|P02662|CASA1_BOVIN	P02662	CASA1_BOVIN	CSN1S1	Alpha-S1-casein			2	2.49977e+06	MS/MS	STY:79.9663@DIGS(0.6834)ES(0.6583)T(0.6583)EDQAMEDIK;M:15.9949@DIGSESTEDQAM(1.0000)EDIK;
DIKEESDEEEEDDEESGR	DIKEES[79.9663]DEEEEDDEESGR	K	L	200	217	18	2	6S(79.9663)	sp|Q96EV2|RBM33_HUMAN	Q96EV2	RBM33_HUMAN	RBM33	RNA-binding protein 33		sp|Q96EV2-2|RBM33_HUMAN	1	0	MS/MS	STY:79.9663@DIKEES(0.5000)DEEEEDDEES(0.5000)GR;
DISGPSPSK	DISGPS[79.9663]PSK	K	K	44	52	9	2	6S(79.9663)	sp|Q96GX9-3|MTNB_HUMAN	Q96GX9-3	MTNB_HUMAN	APIP	Isoform 2 of Methylthioribulose-1-phosphate dehydratase		sp|Q96GX9|MTNB_HUMAN	2	2721577	MS/MS	STY:79.9663@DIS(0.0196)GPS(0.4902)PS(0.4902)K;
DISEGGESPVVQSDEEEVQVDTALATSHTDR	DIS[79.9663]EGGES[79.9663]PVVQSDEEEVQVDTALATSHTDR	R	E	228	258	31	3	3S(79.9663),8S(79.9663)	sp|Q96EV8-3|DTBP1_HUMAN	Q96EV8-3	DTBP1_HUMAN	DTNBP1	Isoform 3 of Dysbindin		sp|Q96EV8|DTBP1_HUMAN	1	8719263	MS/MS	STY:79.9663@DIS(0.6289)EGGES(0.6289)PVVQS(0.6289)DEEEVQVDT(0.0283)ALAT(0.0283)S(0.0283)HT(0.0283)DR;
DKDDQEWESPSPPKPTVFISGVIAR	DKDDQEWESPSPPKPT[79.9663]VFISGVIAR	K	G	41	65	25	3	16T(79.9663)	sp|P51397|DAP1_HUMAN	P51397	DAP1_HUMAN	DAP	Death-associated protein 1			1	1.0829632E7	MS/MS	STY:79.9663@DKDDQEWES(0.0310)PS(0.0339)PPKPT(0.4675)VFIS(0.4675)GVIAR;
DKDDQEWESPSPPKPTVFISGVIAR	DKDDQEWESPS[79.9663]PPKPTVFISGVIAR	K	G	41	65	25	3	11S(79.9663)	sp|P51397|DAP1_HUMAN	P51397	DAP1_HUMAN	DAP	Death-associated protein 1			1	0	MS/MS	STY:79.9663@DKDDQEWES(0.0244)PS(0.8531)PPKPT(0.0832)VFIS(0.0392)GVIAR;
DKDDQEWESPSPPKPTVFISGVIAR	DKDDQEWES[79.9663]PSPPKPTVFISGVIAR	K	G	41	65	25	3	9S(79.9663)	sp|P51397|DAP1_HUMAN	P51397	DAP1_HUMAN	DAP	Death-associated protein 1			2	1.0829632E7	MS/MS	STY:79.9663@DKDDQEWES(0.4706)PS(0.4706)PPKPT(0.0294)VFIS(0.0294)GVIAR;
DKEEIFGSDADSEDDADSDDEDR	DKEEIFGS[79.9663]DADS[79.9663]EDDADS[79.9663]DDEDR	R	G	449	471	23	3	12S(79.9663),18S(79.9663),8S(79.9663)	sp|Q8N7H5|PAF1_HUMAN	Q8N7H5	PAF1_HUMAN	PAF1	RNA polymerase II-associated factor 1 homolog			1	2.28683e+06	MS/MS	STY:79.9663@DKEEIFGS(1.0000)DADS(1.0000)EDDADS(1.0000)DDEDR;
DKEVSDDEAEEK	DKEVS[79.9663]DDEAEEK	R	E	349	360	12	2	5S(79.9663)	sp|P07900-2|HS90A_HUMAN	P07900-2	HS90A_HUMAN	HSP90AA1	Isoform 2 of Heat shock protein HSP 90-alpha		sp|P07900|HS90A_HUMAN	1	6916927	MS/MS	STY:79.9663@DKEVS(1.0000)DDEAEEK;
DKSPVREPIDNLTPEER	DKSPVREPIDNLT[79.9663]PEER	K	D	134	150	17	3	13T(79.9663)	sp|Q14498-2|RBM39_HUMAN	Q14498-2	RBM39_HUMAN	RBM39	Isoform 2 of RNA-binding protein 39		sp|Q14498-3|RBM39_HUMAN, sp|Q14498|RBM39_HUMAN	1	4.2755348E7	MS/MS	STY:79.9663@DKS(0.2697)PVREPIDNLT(0.7303)PEER;
DKSPVREPIDNLTPEER	DKS[79.9663]PVREPIDNLTPEER	K	D	134	150	17	3	3S(79.9663)	sp|Q14498-2|RBM39_HUMAN	Q14498-2	RBM39_HUMAN	RBM39	Isoform 2 of RNA-binding protein 39		sp|Q14498-3|RBM39_HUMAN, sp|Q14498|RBM39_HUMAN	10	4.2755348E7	MS/MS	STY:79.9663@DKS(0.9424)PVREPIDNLT(0.0576)PEER;
DLDEEGSEK	DLDEEGS[79.9663]EK	K	E	573	581	9	2	7S(79.9663)	sp|O43719|HTSF1_HUMAN	O43719	HTSF1_HUMAN	HTATSF1	HIV Tat-specific factor 1			2	5129206	MS/MS	STY:79.9663@DLDEEGS(1.0000)EK;
DLFDLNSSEEDDTEGFSER	DLFDLNS[79.9663]S[79.9663]EEDDTEGFSER	K	G	666	684	19	2,3	7S(79.9663),8S(79.9663)	sp|Q9Y3T9|NOC2L_HUMAN	Q9Y3T9	NOC2L_HUMAN	NOC2L	Nucleolar complex protein 2 homolog			8	1.7261316E7	MS/MS	STY:79.9663@DLFDLNS(0.9258)S(0.9258)EEDDT(0.0742)EGFS(0.0742)ER;
DLFDYSPPLHK	DLFDYS[79.9663]PPLHK	K	N	505	515	11	2	6S(79.9663)	sp|Q9NYF8-2|BCLF1_HUMAN	Q9NYF8-2	BCLF1_HUMAN	BCLAF1	Isoform 2 of Bcl-2-associated transcription factor 1		sp|Q9NYF8-3|BCLF1_HUMAN, sp|Q9NYF8|BCLF1_HUMAN	1	1.0580055E7	MS/MS	STY:79.9663@DLFDY(0.0926)S(0.9074)PPLHK;
DLFDYSPPLHK	DLFDY[79.9663]SPPLHK	K	N	505	515	11	2	5Y(79.9663)	sp|Q9NYF8-2|BCLF1_HUMAN	Q9NYF8-2	BCLF1_HUMAN	BCLAF1	Isoform 2 of Bcl-2-associated transcription factor 1		sp|Q9NYF8-3|BCLF1_HUMAN, sp|Q9NYF8|BCLF1_HUMAN	6	1.0580055E7	MS/MS	STY:79.9663@DLFDY(0.5000)S(0.5000)PPLHK;
DLGHPVEEEDELESGDQEDEDDESEDPGK	DLGHPVEEEDELES[79.9663]GDQEDEDDESEDPGK	K	D	940	968	29	3	14S(79.9663)	sp|O60763-2|USO1_HUMAN	O60763-2	USO1_HUMAN	USO1	Isoform 2 of General vesicular transport factor p115		sp|O60763|USO1_HUMAN	3	0	MS/MS	STY:79.9663@DLGHPVEEEDELES(0.9272)GDQEDEDDES(0.0728)EDPGK;
DLLHPSPEEEK	DLLHPS[79.9663]PEEEK	K	R	6	16	11	2	6S(79.9663)	sp|P42677|RS27_HUMAN	P42677	RS27_HUMAN	RPS27	Small ribosomal subunit protein eS27			2	1.3881e+06	MS/MS	STY:79.9663@DLLHPS(1.0000)PEEEK;
DLVQPDKPASPK	DLVQPDKPAS[79.9663]PK	R	F	506	517	12	2	10S(79.9663)	sp|Q6PJT7-2|ZC3HE_HUMAN	Q6PJT7-2	ZC3HE_HUMAN	ZC3H14	Isoform 2 of Zinc finger CCCH domain-containing protein 14		sp|Q6PJT7-5|ZC3HE_HUMAN, sp|Q6PJT7-9|ZC3HE_HUMAN, sp|Q6PJT7|ZC3HE_HUMAN	2	3.07879e+06	MS/MS	STY:79.9663@DLVQPDKPAS(1.0000)PK;
DNDDDQSDKGTYTIELENPNSEEVEAR	DNDDDQS[79.9663]DKGT[79.9663]YTIELENPNSEEVEAR	K	K	491	517	27	3	11T(79.9663),7S(79.9663)	sp|Q5SW79|CE170_HUMAN	Q5SW79	CE170_HUMAN	CEP170	Centrosomal protein of 170 kDa			1	2.75797e+06	MS/MS	STY:79.9663@DNDDDQS(0.4892)DKGT(0.4892)Y(0.4892)T(0.4892)IELENPNS(0.0431)EEVEAR;
DNEESEQPPVPGTPTLR	DNEESEQPPVPGTPT[79.9663]LR	K	N	634	650	17	2,3	15T(79.9663)	sp|O15439-2|MRP4_HUMAN	O15439-2	MRP4_HUMAN	ABCC4	Isoform 2 of ATP-binding cassette sub-family C member 4		sp|O15439-3|MRP4_HUMAN, sp|O15439-4|MRP4_HUMAN, sp|O15439|MRP4_HUMAN	2	0	MS/MS	STY:79.9663@DNEES(0.0602)EQPPVPGT(0.1574)PT(0.7824)LR;
DPAQPMSPGEATQSGAR	DPAQPMS[79.9663]PGEATQSGAR	R	P	5	21	17	2	7S(79.9663)	sp|Q9BQG0-2|MBB1A_HUMAN	Q9BQG0-2	MBB1A_HUMAN	MYBBP1A	Isoform 2 of Myb-binding protein 1A		sp|Q9BQG0|MBB1A_HUMAN	3	3.2824e+06	MS/MS	STY:79.9663@DPAQPMS(0.3888)PGEAT(0.3056)QS(0.3056)GAR;
DQNESLDEEMFYK	DQNES[79.9663]LDEEMFYK	K	L	669	681	13	2	5S(79.9663)	sp|Q96AC1-3|FERM2_HUMAN	Q96AC1-3	FERM2_HUMAN	FERMT2	Isoform 3 of Fermitin family homolog 2		sp|Q96AC1|FERM2_HUMAN	1	0	MS/MS	STY:79.9663@DQNES(0.8248)LDEEMFY(0.1752)K;
DQQPSGSEGEDDDAEAALK	DQQPS[79.9663]GS[79.9663]EGEDDDAEAALK	K	K	82	100	19	2,3	5S(79.9663),7S(79.9663)	sp|Q9NXG2|THUM1_HUMAN	Q9NXG2	THUM1_HUMAN	THUMPD1	THUMP domain-containing protein 1			6	1.7327826E7	MS/MS	STY:79.9663@DQQPS(1.0000)GS(1.0000)EGEDDDAEAALK;
DQQPSGSEGEDDDAEAALKK	DQQPS[79.9663]GS[79.9663]EGEDDDAEAALKK	K	E	82	101	20	2	5S(79.9663),7S(79.9663)	sp|Q9NXG2|THUM1_HUMAN	Q9NXG2	THUM1_HUMAN	THUMPD1	THUMP domain-containing protein 1			1	1.59176e+06	MS/MS	STY:79.9663@DQQPS(1.0000)GS(1.0000)EGEDDDAEAALKK;
DQSPPPSPPPSYHPPPPPTK	DQS[79.9663]PPPS[79.9663]PPPSYHPPPPPTK	K	K	726	745	20	3	3S(79.9663),7S(79.9663)	sp|Q9P206-2|K1522_HUMAN	Q9P206-2	K1522_HUMAN	KIAA1522	Isoform 2 of Uncharacterized protein KIAA1522		sp|Q9P206-3|K1522_HUMAN, sp|Q9P206|K1522_HUMAN	1	3551792	MS/MS	STY:79.9663@DQS(0.4000)PPPS(0.4000)PPPS(0.4000)Y(0.4000)HPPPPPT(0.4000)K;
DRPVGGSPGGPR	DRPVGGS[79.9663]PGGPR	R	L	129	140	12	2	7S(79.9663)	sp|Q8NHG8|ZNRF2_HUMAN	Q8NHG8	ZNRF2_HUMAN	ZNRF2	E3 ubiquitin-protein ligase ZNRF2			1	0	MS/MS	STY:79.9663@DRPVGGS(1.0000)PGGPR;
DRSPPKSPEK	DRS[79.9663]PPKS[79.9663]PEK	R	L	402	411	10	3	3S(79.9663),7S(79.9663)	sp|Q9UQ35|SRRM2_HUMAN	Q9UQ35	SRRM2_HUMAN	SRRM2	Serine/arginine repetitive matrix protein 2		sp|Q9UQ35-2|SRRM2_HUMAN	1	1.16491e+06	MS/MS	STY:79.9663@DRS(1.0000)PPKS(1.0000)PEK;
DSAIPVESDTDDEGAPR	DSAIPVES[79.9663]DT[79.9663]DDEGAPR	R	I	461	477	17	2	10T(79.9663),8S(79.9663)	sp|Q96D46|NMD3_HUMAN	Q96D46	NMD3_HUMAN	NMD3	60S ribosomal export protein NMD3			1	0	MS/MS	STY:79.9663@DS(0.1674)AIPVES(0.9161)DT(0.9165)DDEGAPR;
DSAPELNVSSSETEEDKEEAKPDGEK	DSAPELNVSS[79.9663]S[79.9663]ETEEDKEEAKPDGEK	K	D	878	903	26	3	10S(79.9663),11S(79.9663)	sp|Q86UV5-2|UBP48_HUMAN	Q86UV5-2	UBP48_HUMAN	USP48	Isoform 2 of Ubiquitin carboxyl-terminal hydrolase 48		sp|Q86UV5-5|UBP48_HUMAN, sp|Q86UV5-6|UBP48_HUMAN, sp|Q86UV5-8|UBP48_HUMAN, sp|Q86UV5|UBP48_HUMAN	1	1.0255195E7	MS/MS	STY:79.9663@DS(0.0493)APELNVS(0.0877)S(0.7810)S(0.7810)ET(0.3010)EEDKEEAKPDGEK;
DSAPELNVSSSETEEDKEEAKPDGEK	DSAPELNVS[79.9663]S[79.9663]SETEEDKEEAKPDGEK	K	D	878	903	26	3	10S(79.9663),9S(79.9663)	sp|Q86UV5-2|UBP48_HUMAN	Q86UV5-2	UBP48_HUMAN	USP48	Isoform 2 of Ubiquitin carboxyl-terminal hydrolase 48		sp|Q86UV5-5|UBP48_HUMAN, sp|Q86UV5-6|UBP48_HUMAN, sp|Q86UV5-8|UBP48_HUMAN, sp|Q86UV5|UBP48_HUMAN	1	1.0215945E7	MS/MS	STY:79.9663@DS(0.1156)APELNVS(0.5941)S(0.5941)S(0.5941)ET(0.1022)EEDKEEAKPDGEK;
DSENLASPSEYPENGER	DSENLAS[79.9663]PSEYPENGER	R	F	600	616	17	2	7S(79.9663)	sp|P52948-2|NUP98_HUMAN	P52948-2	NUP98_HUMAN	NUP98	Isoform 2 of Nuclear pore complex protein Nup98-Nup96		sp|P52948-3|NUP98_HUMAN, sp|P52948-4|NUP98_HUMAN, sp|P52948-5|NUP98_HUMAN, sp|P52948-6|NUP98_HUMAN, sp|P52948|NUP98_HUMAN	1	5864004	MS/MS	STY:79.9663@DS(0.1006)ENLAS(0.4429)PS(0.4429)EY(0.0137)PENGER;
DSGSDEDFLMEDDDDSDYGSSK	DSGSDEDFLM[15.9949]EDDDDS[79.9663]DY[79.9663]GSSK	K	K	129	150	22	2	10M(15.9949),16S(79.9663),18Y(79.9663)	sp|Q9H1E3|NUCKS_HUMAN	Q9H1E3	NUCKS_HUMAN	NUCKS1	Nuclear ubiquitous casein and cyclin-dependent kinase substrate 1		sp|Q9H1E3-2|NUCKS_HUMAN	1	6.65705e+06	MS/MS	STY:79.9663@DS(0.0454)GS(0.0454)DEDFLMEDDDDS(0.4773)DY(0.4773)GS(0.4773)S(0.4773)K;M:15.9949@DSGSDEDFLM(1.0000)EDDDDSDYGSSK;
DSHSSEEDEASSQTDLSQTISK	DSHSSEEDEAS[79.9663]S[79.9663]QTDLSQTISK	R	K	153	174	22	3	11S(79.9663),12S(79.9663)	sp|Q5JTV8-2|TOIP1_HUMAN	Q5JTV8-2	TOIP1_HUMAN	TOR1AIP1	Isoform 2 of Torsin-1A-interacting protein 1		sp|Q5JTV8-3|TOIP1_HUMAN, sp|Q5JTV8-4|TOIP1_HUMAN, sp|Q5JTV8|TOIP1_HUMAN	1	1.4461942E7	MS/MS	STY:79.9663@DS(0.2446)HS(0.2446)S(0.2446)EEDEAS(0.5702)S(0.5702)QT(0.0315)DLS(0.0315)QT(0.0315)IS(0.0315)K;
DSHSSEEDEASSQTDLSQTISK	DSHSSEEDEAS[79.9663]S[79.9663]QT[79.9663]DLSQTISK	R	K	153	174	22	3	11S(79.9663),12S(79.9663),14T(79.9663)	sp|Q5JTV8-2|TOIP1_HUMAN	Q5JTV8-2	TOIP1_HUMAN	TOR1AIP1	Isoform 2 of Torsin-1A-interacting protein 1		sp|Q5JTV8-3|TOIP1_HUMAN, sp|Q5JTV8-4|TOIP1_HUMAN, sp|Q5JTV8|TOIP1_HUMAN	1	2.24053e+06	MS/MS	STY:79.9663@DS(0.0797)HS(0.0797)S(0.0797)EEDEAS(0.4602)S(0.4602)QT(0.4602)DLS(0.4602)QT(0.4602)IS(0.4602)K;
DSPDSPEPPNK	DSPDS[79.9663]PEPPNK	K	K	521	531	11	2	5S(79.9663)	sp|Q9NVM9-2|INT13_HUMAN	Q9NVM9-2	INT13_HUMAN	INTS13	Isoform 2 of Integrator complex subunit 13		sp|Q9NVM9|INT13_HUMAN	1	2.02579e+06	MS/MS	STY:79.9663@DS(0.3434)PDS(0.6566)PEPPNK;
DSPDSPEPPNKK	DSPDS[79.9663]PEPPNKK	K	P	521	532	12	2	5S(79.9663)	sp|Q9NVM9-2|INT13_HUMAN	Q9NVM9-2	INT13_HUMAN	INTS13	Isoform 2 of Integrator complex subunit 13		sp|Q9NVM9|INT13_HUMAN	1	0	MS/MS	STY:79.9663@DS(0.0723)PDS(0.9277)PEPPNKK;
DSQDASAEQSDHDDEVASLASASGGFGTK	DSQDASAEQSDHDDEVAS[79.9663]LASASGGFGTK	R	V	489	517	29	3	18S(79.9663)	sp|Q6P2E9-2|EDC4_HUMAN	Q6P2E9-2	EDC4_HUMAN	EDC4	Isoform 2 of Enhancer of mRNA-decapping protein 4		sp|Q6P2E9|EDC4_HUMAN	1	1.57383e+06	MS/MS	STY:79.9663@DS(0.0180)QDAS(0.0420)AEQS(0.0420)DHDDEVAS(0.8432)LAS(0.0183)AS(0.0183)GGFGT(0.0183)K;
DSQDASAEQSDHDDEVASLASASGGFGTK	DSQDASAEQSDHDDEVAS[79.9663]LAS[79.9663]ASGGFGTK	R	V	489	517	29	3	18S(79.9663),21S(79.9663)	sp|Q6P2E9-2|EDC4_HUMAN	Q6P2E9-2	EDC4_HUMAN	EDC4	Isoform 2 of Enhancer of mRNA-decapping protein 4		sp|Q6P2E9|EDC4_HUMAN	1	1.04466e+06	MS/MS	STY:79.9663@DS(0.0360)QDAS(0.0438)AEQS(0.0438)DHDDEVAS(0.4691)LAS(0.4691)AS(0.4691)GGFGT(0.4691)K;
DSSKGEDSAEETEAK	DSSKGEDS[79.9663]AEETEAK	R	P	475	489	15	2	8S(79.9663)	sp|Q12906-7|ILF3_HUMAN	Q12906-7	ILF3_HUMAN	ILF3	Isoform 7 of Interleukin enhancer-binding factor 3		sp|Q12906-2|ILF3_HUMAN, sp|Q12906-3|ILF3_HUMAN, sp|Q12906-4|ILF3_HUMAN, sp|Q12906-5|ILF3_HUMAN, sp|Q12906-6|ILF3_HUMAN, sp|Q12906|ILF3_HUMAN	2	4879308	MS/MS	STY:79.9663@DS(0.0279)S(0.0279)KGEDS(0.9174)AEET(0.0267)EAK;
DSAPELNVSSSETEEDKEEAKPDGEK	DS[79.9663]APELNVS[79.9663]S[79.9663]SETEEDKEEAKPDGEK	K	D	878	903	26	3	10S(79.9663),2S(79.9663),9S(79.9663)	sp|Q86UV5-2|UBP48_HUMAN	Q86UV5-2	UBP48_HUMAN	USP48	Isoform 2 of Ubiquitin carboxyl-terminal hydrolase 48		sp|Q86UV5-5|UBP48_HUMAN, sp|Q86UV5-6|UBP48_HUMAN, sp|Q86UV5-8|UBP48_HUMAN, sp|Q86UV5|UBP48_HUMAN	1	1.0869302E7	MS/MS	STY:79.9663@DS(0.6231)APELNVS(0.5942)S(0.5942)S(0.5942)ET(0.5942)EEDKEEAKPDGEK;
DSDSEEDLVSYGTGLEPLEEGERPK	DS[79.9663]DS[79.9663]EEDLVSYGTGLEPLEEGERPK	R	K	5	29	25	3	2S(79.9663),4S(79.9663)	sp|Q9BRR8|GPTC1_HUMAN	Q9BRR8	GPTC1_HUMAN	GPATCH1	G patch domain-containing protein 1			1	0	MS/MS	STY:79.9663@DS(0.9363)DS(0.9363)EEDLVS(0.0425)Y(0.0425)GT(0.0425)GLEPLEEGERPK;
DSENLASPSEYPENGER	DS[79.9663]ENLASPSEYPENGER	R	F	600	616	17	2	2S(79.9663)	sp|P52948-2|NUP98_HUMAN	P52948-2	NUP98_HUMAN	NUP98	Isoform 2 of Nuclear pore complex protein Nup98-Nup96		sp|P52948-3|NUP98_HUMAN, sp|P52948-4|NUP98_HUMAN, sp|P52948-5|NUP98_HUMAN, sp|P52948-6|NUP98_HUMAN, sp|P52948|NUP98_HUMAN	1	5864004	MS/MS	STY:79.9663@DS(0.2500)ENLAS(0.2500)PS(0.2500)EY(0.2500)PENGER;
DSGSDEDFLMEDDDDSDYGSSK	DS[79.9663]GS[79.9663]DEDFLMEDDDDSDYGSSK	K	K	129	150	22	2,3	2S(79.9663),4S(79.9663)	sp|Q9H1E3|NUCKS_HUMAN	Q9H1E3	NUCKS_HUMAN	NUCKS1	Nuclear ubiquitous casein and cyclin-dependent kinase substrate 1		sp|Q9H1E3-2|NUCKS_HUMAN	7	4.5538864E7	MS/MS	STY:79.9663@DS(0.9250)GS(0.9250)DEDFLMEDDDDS(0.0375)DY(0.0375)GS(0.0375)S(0.0375)K;
DSGSDEDFLMEDDDDSDYGSSK	DS[79.9663]GS[79.9663]DEDFLM[15.9949]EDDDDSDYGSSK	K	K	129	150	22	2,3	10M(15.9949),2S(79.9663),4S(79.9663)	sp|Q9H1E3|NUCKS_HUMAN	Q9H1E3	NUCKS_HUMAN	NUCKS1	Nuclear ubiquitous casein and cyclin-dependent kinase substrate 1		sp|Q9H1E3-2|NUCKS_HUMAN	4	1.0594316E7	MS/MS	STY:79.9663@DS(0.9353)GS(0.9353)DEDFLMEDDDDS(0.0325)DY(0.0325)GS(0.0325)S(0.0320)K;M:15.9949@DSGSDEDFLM(1.0000)EDDDDSDYGSSK;
DSHSSEEDEASSQTDLSQTISK	DS[79.9663]HSSEEDEASSQTDLSQTISK	R	K	153	174	22	3	2S(79.9663)	sp|Q5JTV8-2|TOIP1_HUMAN	Q5JTV8-2	TOIP1_HUMAN	TOR1AIP1	Isoform 2 of Torsin-1A-interacting protein 1		sp|Q5JTV8-3|TOIP1_HUMAN, sp|Q5JTV8-4|TOIP1_HUMAN, sp|Q5JTV8|TOIP1_HUMAN	1	0	MS/MS	STY:79.9663@DS(0.1244)HS(0.1244)S(0.1244)EEDEAS(0.1045)S(0.1045)QT(0.1045)DLS(0.1045)QT(0.1045)IS(0.1045)K;
DSHSSEEDEASSQTDLSQTISK	DS[79.9663]HSSEEDEASSQTDLSQT[79.9663]IS[79.9663]K	R	K	153	174	22	3	19T(79.9663),21S(79.9663),2S(79.9663)	sp|Q5JTV8-2|TOIP1_HUMAN	Q5JTV8-2	TOIP1_HUMAN	TOR1AIP1	Isoform 2 of Torsin-1A-interacting protein 1		sp|Q5JTV8-3|TOIP1_HUMAN, sp|Q5JTV8-4|TOIP1_HUMAN, sp|Q5JTV8|TOIP1_HUMAN	1	0	MS/MS	STY:79.9663@DS(0.3239)HS(0.3239)S(0.3239)EEDEAS(0.3239)S(0.3239)QT(0.3239)DLS(0.3239)QT(0.3664)IS(0.3664)K;
DSHSSEEDEASSQTDLSQTISK	DS[79.9663]HS[79.9663]SEEDEASSQTDLSQTISK	R	K	153	174	22	3	2S(79.9663),4S(79.9663)	sp|Q5JTV8-2|TOIP1_HUMAN	Q5JTV8-2	TOIP1_HUMAN	TOR1AIP1	Isoform 2 of Torsin-1A-interacting protein 1		sp|Q5JTV8-3|TOIP1_HUMAN, sp|Q5JTV8-4|TOIP1_HUMAN, sp|Q5JTV8|TOIP1_HUMAN	8	3.8196448E7	MS/MS	STY:79.9663@DS(0.7404)HS(0.7404)S(0.0170)EEDEAS(0.1162)S(0.1162)QT(0.1089)DLS(0.0536)QT(0.0536)IS(0.0536)K;
DSNELSDSAGEEDSADLK	DS[79.9663]NELSDSAGEEDS[79.9663]ADLK	K	R	710	727	18	2	14S(79.9663),2S(79.9663)	sp|Q9Y6X9-2|MORC2_HUMAN	Q9Y6X9-2	MORC2_HUMAN	MORC2	Isoform 2 of ATPase MORC2		sp|Q9Y6X9|MORC2_HUMAN	1	5469460	MS/MS	STY:79.9663@DS(0.4974)NELS(0.4974)DS(0.4974)AGEEDS(0.5077)ADLK;
DSNELSDSAGEEDSADLK	DS[79.9663]NELS[79.9663]DSAGEEDSADLK	K	R	710	727	18	2	2S(79.9663),6S(79.9663)	sp|Q9Y6X9-2|MORC2_HUMAN	Q9Y6X9-2	MORC2_HUMAN	MORC2	Isoform 2 of ATPase MORC2		sp|Q9Y6X9|MORC2_HUMAN	2	5469460	MS/MS	STY:79.9663@DS(0.5254)NELS(0.5254)DS(0.5254)AGEEDS(0.4239)ADLK;
DSQDASAEQSDHDDEVASLASASGGFGTK	DS[79.9663]QDASAEQSDHDDEVAS[79.9663]LASASGGFGTK	R	V	489	517	29	3	18S(79.9663),2S(79.9663)	sp|Q6P2E9-2|EDC4_HUMAN	Q6P2E9-2	EDC4_HUMAN	EDC4	Isoform 2 of Enhancer of mRNA-decapping protein 4		sp|Q6P2E9|EDC4_HUMAN	1	1.12704e+06	MS/MS	STY:79.9663@DS(0.4164)QDAS(0.0850)AEQS(0.0850)DHDDEVAS(0.3534)LAS(0.3534)AS(0.3534)GGFGT(0.3534)K;
DSSKGEDSAEETEAK	DS[79.9663]SKGEDSAEETEAK	R	P	475	489	15	2	2S(79.9663)	sp|Q12906-7|ILF3_HUMAN	Q12906-7	ILF3_HUMAN	ILF3	Isoform 7 of Interleukin enhancer-binding factor 3		sp|Q12906-2|ILF3_HUMAN, sp|Q12906-3|ILF3_HUMAN, sp|Q12906-4|ILF3_HUMAN, sp|Q12906-5|ILF3_HUMAN, sp|Q12906-6|ILF3_HUMAN, sp|Q12906|ILF3_HUMAN	1	4879308	MS/MS	STY:79.9663@DS(0.3374)S(0.3374)KGEDS(0.2560)AEET(0.0693)EAK;
DTHEDHDTSTENTDESNHDPQFEPIVSLPEQEIK	DTHEDHDTSTENTDESNHDPQFEPIVS[79.9663]LPEQEIK	K	T	6	39	34	4	27S(79.9663)	sp|P43487-2|RANG_HUMAN	P43487-2	RANG_HUMAN	RANBP1	Isoform 2 of Ran-specific GTPase-activating protein		sp|P43487|RANG_HUMAN	1	2378178	MS/MS	STY:79.9663@DT(0.0606)HEDHDT(0.1393)S(0.1393)T(0.1393)ENT(0.1393)DES(0.1393)NHDPQFEPIVS(0.2431)LPEQEIK;
DTHEDHDTSTENTDESNHDPQFEPIVSLPEQEIK	DTHEDHDTSTENTDES[79.9663]NHDPQFEPIVS[79.9663]LPEQEIK	K	T	6	39	34	3	16S(79.9663),27S(79.9663)	sp|P43487-2|RANG_HUMAN	P43487-2	RANG_HUMAN	RANBP1	Isoform 2 of Ran-specific GTPase-activating protein		sp|P43487|RANG_HUMAN	1	1.116569E7	MS/MS	STY:79.9663@DT(0.1474)HEDHDT(0.1474)S(0.1474)T(0.1474)ENT(0.1474)DES(0.6315)NHDPQFEPIVS(0.6315)LPEQEIK;
DTHEDHDTSTENTDESNHDPQFEPIVSLPEQEIK	DTHEDHDTSTENT[79.9663]DESNHDPQFEPIVSLPEQEIK	K	T	6	39	34	4	13T(79.9663)	sp|P43487-2|RANG_HUMAN	P43487-2	RANG_HUMAN	RANBP1	Isoform 2 of Ran-specific GTPase-activating protein		sp|P43487|RANG_HUMAN	2	6.22591e+06	MS/MS	STY:79.9663@DT(0.0295)HEDHDT(0.0295)S(0.0295)T(0.0382)ENT(0.4326)DES(0.4326)NHDPQFEPIVS(0.0081)LPEQEIK;
DTHEDHDTSTENTDESNHDPQFEPIVSLPEQEIK	DTHEDHDTSTENT[79.9663]DESNHDPQFEPIVS[79.9663]LPEQEIK	K	T	6	39	34	4	13T(79.9663),27S(79.9663)	sp|P43487-2|RANG_HUMAN	P43487-2	RANG_HUMAN	RANBP1	Isoform 2 of Ran-specific GTPase-activating protein		sp|P43487|RANG_HUMAN	1	0	MS/MS	STY:79.9663@DT(0.0901)HEDHDT(0.0901)S(0.0901)T(0.0901)ENT(0.5132)DES(0.5132)NHDPQFEPIVS(0.6130)LPEQEIK;
DTHEDHDTSTENTDESNHDPQFEPIVSLPEQEIK	DTHEDHDT[79.9663]STENTDES[79.9663]NHDPQFEPIVSLPEQEIK	K	T	6	39	34	4	16S(79.9663),8T(79.9663)	sp|P43487-2|RANG_HUMAN	P43487-2	RANG_HUMAN	RANBP1	Isoform 2 of Ran-specific GTPase-activating protein		sp|P43487|RANG_HUMAN	1	1.8032508E7	MS/MS	STY:79.9663@DT(0.1887)HEDHDT(0.4772)S(0.4772)T(0.1284)ENT(0.1284)DES(0.5675)NHDPQFEPIVS(0.0327)LPEQEIK;
DTSENADGQSDENKDDYTIPDEYR	DTSENADGQSDENKDDY[79.9663]TIPDEYR	K	I	757	780	24	3	17Y(79.9663)	sp|P43243|MATR3_HUMAN	P43243	MATR3_HUMAN	MATR3	Matrin-3		sp|P43243-2|MATR3_HUMAN	2	2.080608E7	MS/MS	STY:79.9663@DT(0.0205)S(0.0205)ENADGQS(0.0205)DENKDDY(0.3129)T(0.3129)IPDEY(0.3129)R;
DTSENADGQSDENKDDYTIPDEYR	DTSENADGQS[79.9663]DENKDDYTIPDEYR	K	I	757	780	24	3	10S(79.9663)	sp|P43243|MATR3_HUMAN	P43243	MATR3_HUMAN	MATR3	Matrin-3		sp|P43243-2|MATR3_HUMAN	2	2.080608E7	MS/MS	STY:79.9663@DT(0.0099)S(0.0099)ENADGQS(0.3243)DENKDDY(0.3243)T(0.3243)IPDEY(0.0074)R;
DTYSDRSGSSSPDSEITELK	DTYSDRSGS[79.9663]S[79.9663]S[79.9663]PDSEITELK	R	F	334	353	20	3	10S(79.9663),11S(79.9663),9S(79.9663)	sp|P17812-2|PYRG1_HUMAN	P17812-2	PYRG1_HUMAN	CTPS1	Isoform 2 of CTP synthase 1		sp|P17812|PYRG1_HUMAN	1	4.78651e+06	MS/MS	STY:79.9663@DT(0.0450)Y(0.0450)S(0.0450)DRS(0.0569)GS(0.9115)S(0.9115)S(0.9115)PDS(0.0368)EIT(0.0368)ELK;
DTDALDLEESSSSDHAERPPGPR	DT[79.9663]DALDLEES[79.9663]S[79.9663]SSDHAERPPGPR	R	R	302	324	23	3	10S(79.9663),11S(79.9663),2T(79.9663)	sp|P08913|ADA2A_HUMAN	P08913	ADA2A_HUMAN	ADRA2A	Alpha-2A adrenergic receptor			1	3.4008e+06	MS/MS	STY:79.9663@DT(0.6025)DALDLEES(0.6025)S(0.5983)S(0.5983)S(0.5983)DHAERPPGPR;
DTHEDHDTSTENTDESNHDPQFEPIVSLPEQEIK	DT[79.9663]HEDHDTSTENTDESNHDPQFEPIVS[79.9663]LPEQEIK	K	T	6	39	34	3	27S(79.9663),2T(79.9663)	sp|P43487-2|RANG_HUMAN	P43487-2	RANG_HUMAN	RANBP1	Isoform 2 of Ran-specific GTPase-activating protein		sp|P43487|RANG_HUMAN	1	1.1334218E7	MS/MS	STY:79.9663@DT(0.2784)HEDHDT(0.2784)S(0.2784)T(0.2784)ENT(0.2784)DES(0.2784)NHDPQFEPIVS(0.3294)LPEQEIK;
DTHEDHDTSTENTDESNHDPQFEPIVSLPEQEIK	DT[79.9663]HEDHDT[79.9663]STENTDESNHDPQFEPIVSLPEQEIK	K	T	6	39	34	4	2T(79.9663),8T(79.9663)	sp|P43487-2|RANG_HUMAN	P43487-2	RANG_HUMAN	RANBP1	Isoform 2 of Ran-specific GTPase-activating protein		sp|P43487|RANG_HUMAN	2	1.8032508E7	MS/MS	STY:79.9663@DT(0.4491)HEDHDT(0.3766)S(0.3766)T(0.3766)ENT(0.3766)DES(0.0223)NHDPQFEPIVS(0.0223)LPEQEIK;
DTSATSQSVNGSPQAEQPSLESTSK	DT[79.9663]SATSQSVNGSPQAEQPSLESTSK	K	E	30	54	25	3	2T(79.9663)	sp|Q86WB0-2|ZC3C1_HUMAN	Q86WB0-2	ZC3C1_HUMAN	ZC3HC1	Isoform 2 of Zinc finger C3HC-type protein 1		sp|Q86WB0-3|ZC3C1_HUMAN, sp|Q86WB0|ZC3C1_HUMAN	2	2.02654e+06	MS/MS	STY:79.9663@DT(0.1626)S(0.1626)AT(0.1626)S(0.1626)QS(0.1626)VNGS(0.1626)PQAEQPS(0.0064)LES(0.0060)T(0.0060)S(0.0060)K;
DTSENADGQSDENKDDYTIPDEYR	DT[79.9663]SENADGQSDENKDDYTIPDEYR	K	I	757	780	24	3	2T(79.9663)	sp|P43243|MATR3_HUMAN	P43243	MATR3_HUMAN	MATR3	Matrin-3		sp|P43243-2|MATR3_HUMAN	5	2.080608E7	MS/MS	STY:79.9663@DT(0.3174)S(0.3174)ENADGQS(0.3174)DENKDDY(0.0199)T(0.0199)IPDEY(0.0082)R;
DTYSDRSGSSSPDSEITELK	DT[79.9663]Y[79.9663]SDRSGSSSPDSEITELK	R	F	334	353	20	3	2T(79.9663),3Y(79.9663)	sp|P17812-2|PYRG1_HUMAN	P17812-2	PYRG1_HUMAN	CTPS1	Isoform 2 of CTP synthase 1		sp|P17812|PYRG1_HUMAN	2	1.81144e+06	MS/MS	STY:79.9663@DT(0.3716)Y(0.3716)S(0.3716)DRS(0.3716)GS(0.3716)S(0.0579)S(0.0579)PDS(0.0131)EIT(0.0131)ELK;
DTYSDRSGSSSPDSEITELK	DT[79.9663]Y[79.9663]S[79.9663]DRSGSSSPDSEITELK	R	F	334	353	20	3	2T(79.9663),3Y(79.9663),4S(79.9663)	sp|P17812-2|PYRG1_HUMAN	P17812-2	PYRG1_HUMAN	CTPS1	Isoform 2 of CTP synthase 1		sp|P17812|PYRG1_HUMAN	2	4.78651e+06	MS/MS	STY:79.9663@DT(0.8083)Y(0.8083)S(0.8083)DRS(0.1017)GS(0.1017)S(0.1017)S(0.1017)PDS(0.1017)EIT(0.0667)ELK;
DVMSDETNNEETESPSQEFVNITK	DVMSDETNNEET[79.9663]ESPSQEFVNITK	R	Y	1141	1164	24	3	12T(79.9663)	sp|P46821|MAP1B_HUMAN	P46821	MAP1B_HUMAN	MAP1B	Microtubule-associated protein 1B			1	0	MS/MS	STY:79.9663@DVMS(0.0543)DET(0.0543)NNEET(0.2228)ES(0.2228)PS(0.2228)QEFVNIT(0.2228)K;
DVTPPPETEVVLIK	DVT[79.9663]PPPETEVVLIK	K	N	519	532	14	2	3T(79.9663)	sp|P27816-2|MAP4_HUMAN	P27816-2	MAP4_HUMAN	MAP4	Isoform 2 of Microtubule-associated protein 4		sp|P27816-6|MAP4_HUMAN, sp|P27816|MAP4_HUMAN	2	3497453	MS/MS	STY:79.9663@DVT(0.9344)PPPET(0.0656)EVVLIK;
DVYLSPRDDGYSTK	DVYLSPRDDGY[79.9663]STK	R	D	191	204	14	2	11Y(79.9663)	sp|P38159-2|RBMX_HUMAN	P38159-2	RBMX_HUMAN	RBMX	Isoform 2 of RNA-binding motif protein, X chromosome	RBMXL1	sp|P38159|RBMX_HUMAN, sp|Q96E39|RMXL1_HUMAN	2	1.0000471E7	MS/MS	STY:79.9663@DVY(0.0917)LS(0.0917)PRDDGY(0.7026)S(0.0570)T(0.0570)K;
DVYLSPRDDGYSTK	DVYLS[79.9663]PRDDGYSTK	R	D	191	204	14	2	5S(79.9663)	sp|P38159-2|RBMX_HUMAN	P38159-2	RBMX_HUMAN	RBMX	Isoform 2 of RNA-binding motif protein, X chromosome	RBMXL1	sp|P38159|RBMX_HUMAN, sp|Q96E39|RMXL1_HUMAN	2	1.505732E7	MS/MS	STY:79.9663@DVY(0.1339)LS(0.7863)PRDDGY(0.0266)S(0.0266)T(0.0266)K;
DWEDDSDEDMSNFDR	DWEDDSDEDMS[79.9663]NFDR	K	F	75	89	15	2	11S(79.9663)	sp|Q15185-2|TEBP_HUMAN	Q15185-2	TEBP_HUMAN	PTGES3	Isoform 2 of Prostaglandin E synthase 3		sp|Q15185-4|TEBP_HUMAN, sp|Q15185|TEBP_HUMAN	1	1.09900856E8	MS/MS	STY:79.9663@DWEDDS(0.4859)DEDMS(0.5141)NFDR;
DWEDDSDEDMSNFDR	DWEDDS[79.9663]DEDMSNFDR	K	F	75	89	15	2,3	6S(79.9663)	sp|Q15185-2|TEBP_HUMAN	Q15185-2	TEBP_HUMAN	PTGES3	Isoform 2 of Prostaglandin E synthase 3		sp|Q15185-4|TEBP_HUMAN, sp|Q15185|TEBP_HUMAN	18	1.10396616E8	MS/MS	STY:79.9663@DWEDDS(0.9443)DEDMS(0.0557)NFDR;
DWEDDSDEDMSNFDR	DWEDDS[79.9663]DEDM[15.9949]SNFDR	K	F	75	89	15	2	10M(15.9949),6S(79.9663)	sp|Q15185-2|TEBP_HUMAN	Q15185-2	TEBP_HUMAN	PTGES3	Isoform 2 of Prostaglandin E synthase 3		sp|Q15185-4|TEBP_HUMAN, sp|Q15185|TEBP_HUMAN	10	4.7291136E7	MS/MS	STY:79.9663@DWEDDS(0.9443)DEDMS(0.0557)NFDR;M:15.9949@DWEDDSDEDM(1.0000)SNFDR;
DYDDMSPR	DYDDMS[79.9663]PR	R	R	279	286	8	2	6S(79.9663)	sp|P61978-2|HNRPK_HUMAN	P61978-2	HNRPK_HUMAN	HNRNPK	Isoform 2 of Heterogeneous nuclear ribonucleoprotein K		sp|P61978-3|HNRPK_HUMAN, sp|P61978|HNRPK_HUMAN	2	1.2666116E7	MS/MS	STY:79.9663@DY(0.0569)DDMS(0.9431)PR;
DYDDMSPR	DYDDM[15.9949]S[79.9663]PR	R	R	279	286	8	2	5M(15.9949),6S(79.9663)	sp|P61978-2|HNRPK_HUMAN	P61978-2	HNRPK_HUMAN	HNRNPK	Isoform 2 of Heterogeneous nuclear ribonucleoprotein K		sp|P61978-3|HNRPK_HUMAN, sp|P61978|HNRPK_HUMAN	2	4472169	MS/MS	STY:79.9663@DY(0.0609)DDMS(0.9391)PR;M:15.9949@DYDDM(1.0000)SPR;
DYDEEEQGYDSEK	DYDEEEQGYDS[79.9663]EK	R	E	423	435	13	2	11S(79.9663)	sp|Q05519-2|SRS11_HUMAN	Q05519-2	SRS11_HUMAN	SRSF11	Isoform 2 of Serine/arginine-rich splicing factor 11		sp|Q05519|SRS11_HUMAN	1	0	MS/MS	STY:79.9663@DY(0.1482)DEEEQGY(0.0380)DS(0.8138)EK;
DYDEEEQGYDSEK	DYDEEEQGY[79.9663]DSEK	R	E	423	435	13	2	9Y(79.9663)	sp|Q05519-2|SRS11_HUMAN	Q05519-2	SRS11_HUMAN	SRSF11	Isoform 2 of Serine/arginine-rich splicing factor 11		sp|Q05519|SRS11_HUMAN	2	0	MS/MS	STY:79.9663@DY(0.0472)DEEEQGY(0.8372)DS(0.1156)EK;
DYEEVGVDSVEGEGEEEGEEY	DYEEVGVDS[79.9663]VEGEGEEEGEEY	K	-	431	451	21	2	9S(79.9663)	sp|P68363|TBA1B_HUMAN	P68363	TBA1B_HUMAN	TUBA1B	Tubulin alpha-1B chain	TUBA1A	sp|P68363-2|TBA1B_HUMAN, sp|Q71U36-2|TBA1A_HUMAN, sp|Q71U36|TBA1A_HUMAN	1	0	MS/MS	STY:79.9663@DY(0.0370)EEVGVDS(0.4984)VEGEGEEEGEEY(0.4646);
DYDDMSPR	DY[79.9663]DDMSPR	R	R	279	286	8	2	2Y(79.9663)	sp|P61978-2|HNRPK_HUMAN	P61978-2	HNRPK_HUMAN	HNRNPK	Isoform 2 of Heterogeneous nuclear ribonucleoprotein K		sp|P61978-3|HNRPK_HUMAN, sp|P61978|HNRPK_HUMAN	4	1.2666116E7	MS/MS	STY:79.9663@DY(0.9113)DDMS(0.0887)PR;
DYLLSESEDEGDNDGER	DY[79.9663]LLSES[79.9663]EDEGDNDGER	K	K	25	41	17	2	2Y(79.9663),7S(79.9663)	sp|Q9BVJ6-3|UT14A_HUMAN	Q9BVJ6-3	UT14A_HUMAN	UTP14A	Isoform 3 of U3 small nucleolar RNA-associated protein 14 homolog A		sp|Q9BVJ6|UT14A_HUMAN	1	1.1110188E7	MS/MS	STY:79.9663@DY(0.6585)LLS(0.6585)ES(0.6829)EDEGDNDGER;
DYLLSESEDEGDNDGER	DY[79.9663]LLS[79.9663]ESEDEGDNDGER	K	K	25	41	17	2	2Y(79.9663),5S(79.9663)	sp|Q9BVJ6-3|UT14A_HUMAN	Q9BVJ6-3	UT14A_HUMAN	UTP14A	Isoform 3 of U3 small nucleolar RNA-associated protein 14 homolog A		sp|Q9BVJ6|UT14A_HUMAN	4	1.1110188E7	MS/MS	STY:79.9663@DY(0.6840)LLS(0.6580)ES(0.6580)EDEGDNDGER;
EAAAGIQWSEEETEDEEEEK	EAAAGIQWS[79.9663]EEET[79.9663]EDEEEEK	R	E	169	188	20	2,3	13T(79.9663),9S(79.9663)	sp|P46087-2|NOP2_HUMAN	P46087-2	NOP2_HUMAN	NOP2	Isoform 2 of Probable 28S rRNA (cytosine(4447)-C(5))-methyltransferase		sp|P46087-3|NOP2_HUMAN, sp|P46087-4|NOP2_HUMAN, sp|P46087|NOP2_HUMAN	15	5.9305552E7	MS/MS	STY:79.9663@EAAAGIQWS(1.0000)EEET(1.0000)EDEEEEK;
EAALPPVSPLK	EAALPPVS[79.9663]PLK	R	A	1184	1194	11	2	8S(79.9663)	sp|Q04637-3|IF4G1_HUMAN	Q04637-3	IF4G1_HUMAN	EIF4G1	Isoform B of Eukaryotic translation initiation factor 4 gamma 1		sp|Q04637-4|IF4G1_HUMAN, sp|Q04637-5|IF4G1_HUMAN, sp|Q04637-6|IF4G1_HUMAN, sp|Q04637-7|IF4G1_HUMAN, sp|Q04637-8|IF4G1_HUMAN, sp|Q04637-9|IF4G1_HUMAN, sp|Q04637|IF4G1_HUMAN	2	960001	MS/MS	STY:79.9663@EAALPPVS(1.0000)PLK;
EAATLEVERPLPMEVEKNSTPSEPGSGR	EAATLEVERPLPMEVEKNS[79.9663]T[79.9663]PS[79.9663]EPGSGR	K	G	174	201	28	3	19S(79.9663),20T(79.9663),22S(79.9663)	sp|P51858-2|HDGF_HUMAN	P51858-2	HDGF_HUMAN	HDGF	Isoform 2 of Hepatoma-derived growth factor		sp|P51858-3|HDGF_HUMAN, sp|P51858|HDGF_HUMAN	1	1.19258e+06	MS/MS	STY:79.9663@EAAT(0.4312)LEVERPLPMEVEKNS(0.6564)T(0.6564)PS(0.6280)EPGS(0.6280)GR;
EADIDSSDESDIEEDIDQPSAHK	EADIDSS[79.9663]DES[79.9663]DIEEDIDQPS[79.9663]AHK	K	T	414	436	23	3	10S(79.9663),20S(79.9663),7S(79.9663)	sp|Q9P2I0|CPSF2_HUMAN	Q9P2I0	CPSF2_HUMAN	CPSF2	Cleavage and polyadenylation specificity factor subunit 2			1	1.1104159E7	MS/MS	STY:79.9663@EADIDS(0.7340)S(0.7604)DES(0.7604)DIEEDIDQPS(0.7453)AHK;
EADIDSSDESDIEEDIDQPSAHK	EADIDS[79.9663]SDES[79.9663]DIEEDIDQPS[79.9663]AHK	K	T	414	436	23	3	10S(79.9663),20S(79.9663),6S(79.9663)	sp|Q9P2I0|CPSF2_HUMAN	Q9P2I0	CPSF2_HUMAN	CPSF2	Cleavage and polyadenylation specificity factor subunit 2			1	5.3557364E7	MS/MS	STY:79.9663@EADIDS(0.7401)S(0.7401)DES(0.7601)DIEEDIDQPS(0.7596)AHK;
EADIDSSDESDIEEDIDQPSAHK	EADIDS[79.9663]S[79.9663]DESDIEEDIDQPS[79.9663]AHK	K	T	414	436	23	3	20S(79.9663),6S(79.9663),7S(79.9663)	sp|Q9P2I0|CPSF2_HUMAN	Q9P2I0	CPSF2_HUMAN	CPSF2	Cleavage and polyadenylation specificity factor subunit 2			5	5.3881652E7	MS/MS	STY:79.9663@EADIDS(0.7452)S(0.7452)DES(0.7452)DIEEDIDQPS(0.7645)AHK;
EADIDSSDESDIEEDIDQPSAHK	EADIDS[79.9663]S[79.9663]DES[79.9663]DIEEDIDQPSAHK	K	T	414	436	23	3	10S(79.9663),6S(79.9663),7S(79.9663)	sp|Q9P2I0|CPSF2_HUMAN	Q9P2I0	CPSF2_HUMAN	CPSF2	Cleavage and polyadenylation specificity factor subunit 2			13	6.515656E7	MS/MS	STY:79.9663@EADIDS(0.9483)S(0.9483)DES(0.9484)DIEEDIDQPS(0.1549)AHK;
EAEADLSFDSYHSTQTDLGPSLGK	EAEADLSFDSYHST[79.9663]QT[79.9663]DLGPSLGK	K	P	380	403	24	3	14T(79.9663),16T(79.9663)	sp|Q9P0K7-2|RAI14_HUMAN	Q9P0K7-2	RAI14_HUMAN	RAI14	Isoform 2 of Ankycorbin		sp|Q9P0K7-3|RAI14_HUMAN, sp|Q9P0K7-4|RAI14_HUMAN, sp|Q9P0K7|RAI14_HUMAN	1	5.4914e+06	MS/MS	STY:79.9663@EAEADLS(0.0493)FDS(0.0942)Y(0.0942)HS(0.0942)T(0.8242)QT(0.8048)DLGPS(0.0391)LGK;
EAEADLSFDSYHSTQTDLGPSLGK	EAEADLSFDSYHST[79.9663]QT[79.9663]DLGPS[79.9663]LGK	K	P	380	403	24	3	14T(79.9663),16T(79.9663),21S(79.9663)	sp|Q9P0K7-2|RAI14_HUMAN	Q9P0K7-2	RAI14_HUMAN	RAI14	Isoform 2 of Ankycorbin		sp|Q9P0K7-3|RAI14_HUMAN, sp|Q9P0K7-4|RAI14_HUMAN, sp|Q9P0K7|RAI14_HUMAN	1	1.2542805E7	MS/MS	STY:79.9663@EAEADLS(0.2485)FDS(0.2485)Y(0.0970)HS(0.0970)T(0.7697)QT(0.7697)DLGPS(0.7697)LGK;
EAEADLSFDSYHSTQTDLGPSLGK	EAEADLS[79.9663]FDSYHSTQT[79.9663]DLGPS[79.9663]LGK	K	P	380	403	24	3	16T(79.9663),21S(79.9663),7S(79.9663)	sp|Q9P0K7-2|RAI14_HUMAN	Q9P0K7-2	RAI14_HUMAN	RAI14	Isoform 2 of Ankycorbin		sp|Q9P0K7-3|RAI14_HUMAN, sp|Q9P0K7-4|RAI14_HUMAN, sp|Q9P0K7|RAI14_HUMAN	1	1.2637081E7	MS/MS	STY:79.9663@EAEADLS(0.9056)FDS(0.0682)Y(0.0748)HS(0.0748)T(0.0748)QT(0.9043)DLGPS(0.8975)LGK;
EAEADLSFDSYHSTQTDLGPSLGK	EAEADLS[79.9663]FDS[79.9663]Y[79.9663]HSTQTDLGPSLGK	K	P	380	403	24	3	10S(79.9663),11Y(79.9663),7S(79.9663)	sp|Q9P0K7-2|RAI14_HUMAN	Q9P0K7-2	RAI14_HUMAN	RAI14	Isoform 2 of Ankycorbin		sp|Q9P0K7-3|RAI14_HUMAN, sp|Q9P0K7-4|RAI14_HUMAN, sp|Q9P0K7|RAI14_HUMAN	1	1.2542805E7	MS/MS	STY:79.9663@EAEADLS(0.4936)FDS(0.4936)Y(0.4936)HS(0.4936)T(0.4936)QT(0.4636)DLGPS(0.0686)LGK;
EAEDSDSDDNIK	EAEDS[79.9663]DS[79.9663]DDNIK	K	R	507	518	12	2	5S(79.9663),7S(79.9663)	sp|Q96ST2|IWS1_HUMAN	Q96ST2	IWS1_HUMAN	IWS1	Protein IWS1 homolog		sp|Q96ST2-2|IWS1_HUMAN, sp|Q96ST2-3|IWS1_HUMAN	1	1.67272e+06	MS/MS	STY:79.9663@EAEDS(1.0000)DS(1.0000)DDNIK;
EAEEESSGGEEEDEDENIEVVYSK	EAEEESSGGEEEDEDENIEVVY[79.9663]S[79.9663]K	K	A	384	407	24	2,3	22Y(79.9663),23S(79.9663)	sp|P55010|IF5_HUMAN	P55010	IF5_HUMAN	EIF5	Eukaryotic translation initiation factor 5			7	3.70845792E8	MS/MS	STY:79.9663@EAEEES(0.1327)S(0.1327)GGEEEDEDENIEVVY(0.8673)S(0.8673)K;
EAEEESSGGEEEDEDENIEVVYSK	EAEEES[79.9663]SGGEEEDEDENIEVVYS[79.9663]K	K	A	384	407	24	3	23S(79.9663),6S(79.9663)	sp|P55010|IF5_HUMAN	P55010	IF5_HUMAN	EIF5	Eukaryotic translation initiation factor 5			1	3.65542784E8	MS/MS	STY:79.9663@EAEEES(0.4906)S(0.4906)GGEEEDEDENIEVVY(0.4906)S(0.5283)K;
EAEEESSGGEEEDEDENIEVVYSK	EAEEES[79.9663]S[79.9663]GGEEEDEDENIEVVYSK	K	A	384	407	24	2,3	6S(79.9663),7S(79.9663)	sp|P55010|IF5_HUMAN	P55010	IF5_HUMAN	EIF5	Eukaryotic translation initiation factor 5			84	4.45391072E8	MS/MS	STY:79.9663@EAEEES(0.9446)S(0.9446)GGEEEDEDENIEVVY(0.0554)S(0.0554)K;
EAEEGEDDRDSANGEDDS	EAEEGEDDRDSANGEDDS[79.9663]	K	-	276	293	18	2	18S(79.9663)	sp|P07910-2|HNRPC_HUMAN	P07910-2	HNRPC_HUMAN	HNRNPC	Isoform C1 of Heterogeneous nuclear ribonucleoproteins C1/C2		sp|P07910-3|HNRPC_HUMAN, sp|P07910-4|HNRPC_HUMAN, sp|P07910|HNRPC_HUMAN	3	1.15336624E8	MS/MS	STY:79.9663@EAEEGEDDRDS(0.2657)ANGEDDS(0.7343);
EAEEGEDDRDSANGEDDS	EAEEGEDDRDS[79.9663]ANGEDDS	K	-	276	293	18	2	11S(79.9663)	sp|P07910-2|HNRPC_HUMAN	P07910-2	HNRPC_HUMAN	HNRNPC	Isoform C1 of Heterogeneous nuclear ribonucleoproteins C1/C2		sp|P07910-3|HNRPC_HUMAN, sp|P07910-4|HNRPC_HUMAN, sp|P07910|HNRPC_HUMAN	9	2.02347136E8	MS/MS	STY:79.9663@EAEEGEDDRDS(0.9218)ANGEDDS(0.0782);
EAPAEGEAAEPGSPTAAEGEAASAASSTSSPK	EAPAEGEAAEPGSPTAAEGEAASAASSTSS[79.9663]PK	K	A	106	137	32	3	30S(79.9663)	sp|P29966|MARCS_HUMAN	P29966	MARCS_HUMAN	MARCKS	Myristoylated alanine-rich C-kinase substrate			2	7010171	MS/MS	STY:79.9663@EAPAEGEAAEPGS(0.0526)PT(0.0526)AAEGEAAS(0.0333)AAS(0.0114)S(0.0125)T(0.0130)S(0.0130)S(0.8114)PK;
EAPAEGEAAEPGSPTAAEGEAASAASSTSSPK	EAPAEGEAAEPGSPTAAEGEAASAASS[79.9663]TSSPK	K	A	106	137	32	3	27S(79.9663)	sp|P29966|MARCS_HUMAN	P29966	MARCS_HUMAN	MARCKS	Myristoylated alanine-rich C-kinase substrate			1	7010171	MS/MS	STY:79.9663@EAPAEGEAAEPGS(0.0091)PT(0.0114)AAEGEAAS(0.0114)AAS(0.0159)S(0.2380)T(0.2380)S(0.2380)S(0.2380)PK;
EAPAEGEAAEPGSPTAAEGEAASAASSTSSPK	EAPAEGEAAEPGSPTAAEGEAASAAS[79.9663]STSSPK	K	A	106	137	32	3	26S(79.9663)	sp|P29966|MARCS_HUMAN	P29966	MARCS_HUMAN	MARCKS	Myristoylated alanine-rich C-kinase substrate			1	2.4851416E7	MS/MS	STY:79.9663@EAPAEGEAAEPGS(0.0213)PT(0.0213)AAEGEAAS(0.0042)AAS(0.2371)S(0.2371)T(0.2371)S(0.2371)S(0.0048)PK;
EAPAEGEAAEPGSPTAAEGEAASAASSTSSPK	EAPAEGEAAEPGSPTAAEGEAASAAS[79.9663]S[79.9663]TSSPK	K	A	106	137	32	3	26S(79.9663),27S(79.9663)	sp|P29966|MARCS_HUMAN	P29966	MARCS_HUMAN	MARCKS	Myristoylated alanine-rich C-kinase substrate			1	8699680	MS/MS	STY:79.9663@EAPAEGEAAEPGS(0.1577)PT(0.1577)AAEGEAAS(0.1577)AAS(0.3054)S(0.3054)T(0.3054)S(0.3054)S(0.3054)PK;
EAPAEGEAAEPGSPTAAEGEAASAASSTSSPK	EAPAEGEAAEPGSPTAAEGEAAS[79.9663]AASSTSSPK	K	A	106	137	32	3	23S(79.9663)	sp|P29966|MARCS_HUMAN	P29966	MARCS_HUMAN	MARCKS	Myristoylated alanine-rich C-kinase substrate			2	7010171	MS/MS	STY:79.9663@EAPAEGEAAEPGS(0.0875)PT(0.0875)AAEGEAAS(0.4024)AAS(0.0845)S(0.0845)T(0.0845)S(0.0845)S(0.0845)PK;
EAPAEGEAAEPGSPTAAEGEAASAASSTSSPK	EAPAEGEAAEPGSPTAAEGEAAS[79.9663]AAS[79.9663]S[79.9663]TSSPK	K	A	106	137	32	3	23S(79.9663),26S(79.9663),27S(79.9663)	sp|P29966|MARCS_HUMAN	P29966	MARCS_HUMAN	MARCKS	Myristoylated alanine-rich C-kinase substrate			1	0	MS/MS	STY:79.9663@EAPAEGEAAEPGS(0.0779)PT(0.0779)AAEGEAAS(0.4740)AAS(0.4740)S(0.4740)T(0.4740)S(0.4740)S(0.4740)PK;
EAPAEGEAAEPGSPTAAEGEAASAASSTSSPK	EAPAEGEAAEPGS[79.9663]PTAAEGEAASAASSTSSPK	K	A	106	137	32	3	13S(79.9663)	sp|P29966|MARCS_HUMAN	P29966	MARCS_HUMAN	MARCKS	Myristoylated alanine-rich C-kinase substrate			9	2.4851416E7	MS/MS	STY:79.9663@EAPAEGEAAEPGS(0.9178)PT(0.0314)AAEGEAAS(0.0085)AAS(0.0085)S(0.0085)T(0.0085)S(0.0085)S(0.0085)PK;
EAPAEGEAAEPGSPTAAEGEAASAASSTSSPK	EAPAEGEAAEPGS[79.9663]PTAAEGEAAS[79.9663]AASSTSSPK	K	A	106	137	32	3	13S(79.9663),23S(79.9663)	sp|P29966|MARCS_HUMAN	P29966	MARCS_HUMAN	MARCKS	Myristoylated alanine-rich C-kinase substrate			1	1.32045e+06	MS/MS	STY:79.9663@EAPAEGEAAEPGS(0.5128)PT(0.5128)AAEGEAAS(0.6246)AAS(0.0700)S(0.0700)T(0.0700)S(0.0700)S(0.0700)PK;
EAPAEGEAAEPGSPTAAEGEAASAASSTSSPK	EAPAEGEAAEPGS[79.9663]PT[79.9663]AAEGEAASAASSTSSPK	K	A	106	137	32	3	13S(79.9663),15T(79.9663)	sp|P29966|MARCS_HUMAN	P29966	MARCS_HUMAN	MARCKS	Myristoylated alanine-rich C-kinase substrate			4	8699680	MS/MS	STY:79.9663@EAPAEGEAAEPGS(0.6236)PT(0.6236)AAEGEAAS(0.2841)AAS(0.1017)S(0.1017)T(0.1017)S(0.0818)S(0.0818)PK;
EAPERPSLEDTEPSDSGDEMMDPASLEAEADQGLCR	EAPERPS[79.9663]LEDT[79.9663]EPSDSGDEMMDPASLEAEADQGLC[57.0215]R	R	Q	48	83	36	3	11T(79.9663),35C(57.0215),7S(79.9663)	sp|Q9NXX6-2|NSE4A_HUMAN	Q9NXX6-2	NSE4A_HUMAN	NSMCE4A	Isoform 2 of Non-structural maintenance of chromosomes element 4 homolog A		sp|Q9NXX6|NSE4A_HUMAN	1	0	MS/MS	STY:79.9663@EAPERPS(0.7996)LEDT(0.8005)EPS(0.1784)DS(0.1784)GDEMMDPAS(0.0432)LEAEADQGLCR;
EDDKDSDQETVDEEVDENSSGMFAAEETGEALSEETTAGEQSTR	EDDKDSDQETVDEEVDENSSGM[15.9949]FAAEETGEALS[79.9663]EET[79.9663]TAGEQSTR	R	S	473	516	44	4	22M(15.9949),33S(79.9663),36T(79.9663)	sp|Q9BVP2-2|GNL3_HUMAN	Q9BVP2-2	GNL3_HUMAN	GNL3	Isoform 2 of Guanine nucleotide-binding protein-like 3		sp|Q9BVP2|GNL3_HUMAN	1	4430846	MS/MS	STY:79.9663@EDDKDS(0.0550)DQET(0.0550)VDEEVDENS(0.0384)S(0.0384)GMFAAEET(0.0384)GEALS(0.3549)EET(0.3549)T(0.3549)AGEQS(0.3549)T(0.3549)R;M:15.9949@EDDKDSDQETVDEEVDENSSGM(1.0000)FAAEETGEALSEETTAGEQSTR;
EDDKDSDQETVDEEVDENSSGMFAAEETGEALSEETTAGEQSTR	EDDKDS[79.9663]DQETVDEEVDENSSGMFAAEETGEALS[79.9663]EETTAGEQSTR	R	S	473	516	44	4	33S(79.9663),6S(79.9663)	sp|Q9BVP2-2|GNL3_HUMAN	Q9BVP2-2	GNL3_HUMAN	GNL3	Isoform 2 of Guanine nucleotide-binding protein-like 3		sp|Q9BVP2|GNL3_HUMAN	2	4.885108E7	MS/MS	STY:79.9663@EDDKDS(0.8904)DQET(0.0346)VDEEVDENS(0.0278)S(0.0278)GMFAAEET(0.0768)GEALS(0.8793)EET(0.0158)T(0.0158)AGEQS(0.0158)T(0.0158)R;
EDDKDSDQETVDEEVDENSSGMFAAEETGEALSEETTAGEQSTR	EDDKDS[79.9663]DQETVDEEVDENSSGMFAAEET[79.9663]GEALSEETTAGEQSTR	R	S	473	516	44	4	28T(79.9663),6S(79.9663)	sp|Q9BVP2-2|GNL3_HUMAN	Q9BVP2-2	GNL3_HUMAN	GNL3	Isoform 2 of Guanine nucleotide-binding protein-like 3		sp|Q9BVP2|GNL3_HUMAN	1	4.885108E7	MS/MS	STY:79.9663@EDDKDS(0.5263)DQET(0.5263)VDEEVDENS(0.0612)S(0.0612)GMFAAEET(0.6734)GEALS(0.0961)EET(0.0139)T(0.0139)AGEQS(0.0139)T(0.0139)R;
EDDKDSDQETVDEEVDENSSGMFAAEETGEALSEETTAGEQSTR	EDDKDS[79.9663]DQET[79.9663]VDEEVDENSSGMFAAEETGEALSEETTAGEQSTR	R	S	473	516	44	4	10T(79.9663),6S(79.9663)	sp|Q9BVP2-2|GNL3_HUMAN	Q9BVP2-2	GNL3_HUMAN	GNL3	Isoform 2 of Guanine nucleotide-binding protein-like 3		sp|Q9BVP2|GNL3_HUMAN	2	4.885108E7	MS/MS	STY:79.9663@EDDKDS(0.5843)DQET(0.5843)VDEEVDENS(0.1763)S(0.1763)GMFAAEET(0.1763)GEALS(0.1763)EET(0.0400)T(0.0400)AGEQS(0.0230)T(0.0230)R;
EDDKDSDQETVDEEVDENSSGMFAAEETGEALSEETTAGEQSTR	EDDKDS[79.9663]DQET[79.9663]VDEEVDENSSGM[15.9949]FAAEETGEALSEETTAGEQSTR	R	S	473	516	44	4	10T(79.9663),22M(15.9949),6S(79.9663)	sp|Q9BVP2-2|GNL3_HUMAN	Q9BVP2-2	GNL3_HUMAN	GNL3	Isoform 2 of Guanine nucleotide-binding protein-like 3		sp|Q9BVP2|GNL3_HUMAN	1	0	MS/MS	STY:79.9663@EDDKDS(0.3046)DQET(0.3046)VDEEVDENS(0.3046)S(0.3046)GMFAAEET(0.3046)GEALS(0.3046)EET(0.0676)T(0.0676)AGEQS(0.0185)T(0.0185)R;M:15.9949@EDDKDSDQETVDEEVDENSSGM(1.0000)FAAEETGEALSEETTAGEQSTR;
EDEEMKTDSDDLLEVCGEDVPQPEEEEFETIER	EDEEMKT[79.9663]DSDDLLEVC[57.0215]GEDVPQPEEEEFET[79.9663]IER	K	F	244	276	33	3	16C(57.0215),30T(79.9663),7T(79.9663)	sp|O14646-2|CHD1_HUMAN	O14646-2	CHD1_HUMAN	CHD1	Isoform 2 of Chromodomain-helicase-DNA-binding protein 1		sp|O14646|CHD1_HUMAN	1	0	MS/MS	STY:79.9663@EDEEMKT(0.6601)DS(0.6601)DDLLEVCGEDVPQPEEEEFET(0.6798)IER;
EDEISPPPPNPVVK	EDEIS[79.9663]PPPPNPVVK	R	G	79	92	14	2	5S(79.9663)	sp|P10644-2|KAP0_HUMAN	P10644-2	KAP0_HUMAN	PRKAR1A	Isoform 2 of cAMP-dependent protein kinase type I-alpha regulatory subunit		sp|P10644|KAP0_HUMAN	1	1.27229e+06	MS/MS	STY:79.9663@EDEIS(1.0000)PPPPNPVVK;
EDHLVYADEESSNITDGRITPEPAVSNTEEPSTTSTASNYPDVLTR	EDHLVY[79.9663]ADEES[79.9663]S[79.9663]NITDGRITPEPAVSNTEEPSTTSTASNYPDVLTR	K	P	83	128	46	4	11S(79.9663),12S(79.9663),6Y(79.9663)	sp|P49790-2|NU153_HUMAN	P49790-2	NU153_HUMAN	NUP153	Isoform 2 of Nuclear pore complex protein Nup153		sp|P49790-3|NU153_HUMAN, sp|P49790|NU153_HUMAN	1	0	MS/MS	STY:79.9663@EDHLVY(0.3760)ADEES(0.3760)S(0.3760)NIT(0.3760)DGRIT(0.3760)PEPAVS(0.3760)NT(0.3760)EEPS(0.0460)T(0.0460)T(0.0460)S(0.0460)T(0.0460)AS(0.0460)NY(0.0460)PDVLT(0.0460)R;
EDILENEDEQNSPPKK	EDILENEDEQNS[79.9663]PPKK	K	G	1272	1287	16	2,3	12S(79.9663)	sp|Q9NTI5|PDS5B_HUMAN	Q9NTI5	PDS5B_HUMAN	PDS5B	Sister chromatid cohesion protein PDS5 homolog B		sp|Q9NTI5-2|PDS5B_HUMAN, sp|Q9NTI5-5|PDS5B_HUMAN	4	9741792	MS/MS	STY:79.9663@EDILENEDEQNS(1.0000)PPKK;
EDKSPSEESAPTTSPESVSGSVPSSGSSGR	EDKS[79.9663]PSEESAPTTSPESVSGSVPSSGSSGR	R	E	120	149	30	3	4S(79.9663)	sp|P54725-2|RD23A_HUMAN	P54725-2	RD23A_HUMAN	RAD23A	Isoform 2 of UV excision repair protein RAD23 homolog A		sp|P54725-3|RD23A_HUMAN, sp|P54725|RD23A_HUMAN	1	779885	MS/MS	STY:79.9663@EDKS(0.1302)PS(0.1302)EES(0.1302)APT(0.1302)T(0.1302)S(0.1302)PES(0.0313)VS(0.0313)GS(0.0313)VPS(0.0313)S(0.0313)GS(0.0313)S(0.0313)GR;
EDSDEEEDDDSEEDEEDDEDEDEDEDEIEPAAMK	EDS[79.9663]DEEEDDDS[79.9663]EEDEEDDEDEDEDEDEIEPAAMK	K	A	143	176	34	3	11S(79.9663),3S(79.9663)	sp|P19338|NUCL_HUMAN	P19338	NUCL_HUMAN	NCL	Nucleolin			7	1.2855794E7	MS/MS	STY:79.9663@EDS(1.0000)DEEEDDDS(1.0000)EEDEEDDEDEDEDEDEIEPAAMK;
EDSDEEEDDDSEEDEEDDEDEDEDEDEIEPAAMK	EDS[79.9663]DEEEDDDS[79.9663]EEDEEDDEDEDEDEDEIEPAAM[15.9949]K	K	A	143	176	34	3	11S(79.9663),33M(15.9949),3S(79.9663)	sp|P19338|NUCL_HUMAN	P19338	NUCL_HUMAN	NCL	Nucleolin			1	2.14464e+06	MS/MS	STY:79.9663@EDS(1.0000)DEEEDDDS(1.0000)EEDEEDDEDEDEDEDEIEPAAMK;M:15.9949@EDSDEEEDDDSEEDEEDDEDEDEDEDEIEPAAM(1.0000)K;
EDSGTFSLGK	EDS[79.9663]GTFSLGK	R	M	16	25	10	2	3S(79.9663)	sp|O75569|PRKRA_HUMAN	O75569	PRKRA_HUMAN	PRKRA	Interferon-inducible double-stranded RNA-dependent protein kinase activator A			1	1.40476e+06	MS/MS	STY:79.9663@EDS(0.3333)GT(0.3333)FS(0.3333)LGK;
EDSSEEEEEEIDDEEIER	EDS[79.9663]S[79.9663]EEEEEEIDDEEIER	R	R	130	147	18	2,3	3S(79.9663),4S(79.9663)	sp|P55081|MFAP1_HUMAN	P55081	MFAP1_HUMAN	MFAP1	Microfibrillar-associated protein 1			9	2.9884772E7	MS/MS	STY:79.9663@EDS(1.0000)S(1.0000)EEEEEEIDDEEIER;
EEASDDDMEGDEAVVR	EEAS[79.9663]DDDMEGDEAVVR	R	C	222	237	16	2	4S(79.9663)	sp|O75643-2|U520_HUMAN	O75643-2	U520_HUMAN	SNRNP200	Isoform 2 of U5 small nuclear ribonucleoprotein 200 kDa helicase		sp|O75643|U520_HUMAN	5	3843323	MS/MS	STY:79.9663@EEAS(1.0000)DDDMEGDEAVVR;
EEASDDDMEGDEAVVR	EEAS[79.9663]DDDM[15.9949]EGDEAVVR	R	C	222	237	16	2	4S(79.9663),8M(15.9949)	sp|O75643-2|U520_HUMAN	O75643-2	U520_HUMAN	SNRNP200	Isoform 2 of U5 small nuclear ribonucleoprotein 200 kDa helicase		sp|O75643|U520_HUMAN	2	1.45034e+06	MS/MS	STY:79.9663@EEAS(1.0000)DDDMEGDEAVVR;M:15.9949@EEASDDDM(1.0000)EGDEAVVR;
EECPRPMSISPPDFSPK	EEC[57.0215]PRPMS[79.9663]IS[79.9663]PPDFSPK	K	T	1611	1627	17	3	10S(79.9663),3C(57.0215),8S(79.9663)	sp|P46821|MAP1B_HUMAN	P46821	MAP1B_HUMAN	MAP1B	Microtubule-associated protein 1B			1	0	MS/MS	STY:79.9663@EECPRPMS(0.6667)IS(0.6667)PPDFS(0.6667)PK;
EECPRPMSISPPDFSPK	EEC[57.0215]PRPMS[79.9663]IS[79.9663]PPDFS[79.9663]PK	K	T	1611	1627	17	3	10S(79.9663),15S(79.9663),3C(57.0215),8S(79.9663)	sp|P46821|MAP1B_HUMAN	P46821	MAP1B_HUMAN	MAP1B	Microtubule-associated protein 1B			3	8255181	MS/MS	STY:79.9663@EECPRPMS(1.0000)IS(1.0000)PPDFS(1.0000)PK;
EEDEEPESPPEK	EEDEEPES[79.9663]PPEK	K	K	207	218	12	2	8S(79.9663)	sp|Q9H1E3|NUCKS_HUMAN	Q9H1E3	NUCKS_HUMAN	NUCKS1	Nuclear ubiquitous casein and cyclin-dependent kinase substrate 1		sp|Q9H1E3-2|NUCKS_HUMAN	19	4.9989968E7	MS/MS	STY:79.9663@EEDEEPES(1.0000)PPEK;
EEDEPEERSGDETPGSEVPGDK	EEDEPEERSGDET[79.9663]PGSEVPGDK	R	A	153	174	22	3	13T(79.9663)	sp|Q1KMD3|HNRL2_HUMAN	Q1KMD3	HNRL2_HUMAN	HNRNPUL2	Heterogeneous nuclear ribonucleoprotein U-like protein 2			1	3481352	MS/MS	STY:79.9663@EEDEPEERS(0.1387)GDET(0.4307)PGS(0.4307)EVPGDK;
EEDEPEERSGDETPGSEVPGDK	EEDEPEERS[79.9663]GDETPGSEVPGDK	R	A	153	174	22	3	9S(79.9663)	sp|Q1KMD3|HNRL2_HUMAN	Q1KMD3	HNRL2_HUMAN	HNRNPUL2	Heterogeneous nuclear ribonucleoprotein U-like protein 2			1	3481352	MS/MS	STY:79.9663@EEDEPEERS(0.4892)GDET(0.4892)PGS(0.0215)EVPGDK;
EEEEEEEEEINIYAVTEEESDEEGSQEK	EEEEEEEEEINIYAVTEEESDEEGS[79.9663]QEK	K	G	203	230	28	3	25S(79.9663)	sp|Q9ULR0-1|ISY1_HUMAN	Q9ULR0-1	ISY1_HUMAN	ISY1	Isoform 2 of Pre-mRNA-splicing factor ISY1 homolog		sp|Q9ULR0-2|ISY1_HUMAN, sp|Q9ULR0|ISY1_HUMAN	2	1.9285826E7	MS/MS	STY:79.9663@EEEEEEEEEINIY(0.0295)AVT(0.0295)EEES(0.0295)DEEGS(0.9115)QEK;
EEEEEEEEEINIYAVTEEESDEEGSQEK	EEEEEEEEEINIYAVTEEES[79.9663]DEEGSQEK	K	G	203	230	28	3	20S(79.9663)	sp|Q9ULR0-1|ISY1_HUMAN	Q9ULR0-1	ISY1_HUMAN	ISY1	Isoform 2 of Pre-mRNA-splicing factor ISY1 homolog		sp|Q9ULR0-2|ISY1_HUMAN, sp|Q9ULR0|ISY1_HUMAN	1	0	MS/MS	STY:79.9663@EEEEEEEEEINIY(0.1646)AVT(0.1646)EEES(0.3354)DEEGS(0.3354)QEK;
EEEEEEEEEINIYAVTEEESDEEGSQEK	EEEEEEEEEINIY[79.9663]AVTEEESDEEGSQEK	K	G	203	230	28	3	13Y(79.9663)	sp|Q9ULR0-1|ISY1_HUMAN	Q9ULR0-1	ISY1_HUMAN	ISY1	Isoform 2 of Pre-mRNA-splicing factor ISY1 homolog		sp|Q9ULR0-2|ISY1_HUMAN, sp|Q9ULR0|ISY1_HUMAN	4	1.9285826E7	MS/MS	STY:79.9663@EEEEEEEEEINIY(0.7911)AVT(0.1180)EEES(0.0644)DEEGS(0.0265)QEK;
EEEEEEQISESESEDEENEIIYNPK	EEEEEEQIS[79.9663]ESES[79.9663]EDEENEIIYNPK	R	N	357	381	25	3	13S(79.9663),9S(79.9663)	sp|Q12874|SF3A3_HUMAN	Q12874	SF3A3_HUMAN	SF3A3	Splicing factor 3A subunit 3			1	1.624e+06	MS/MS	STY:79.9663@EEEEEEQIS(0.5001)ES(0.5001)ES(0.5039)EDEENEIIY(0.4959)NPK;
EEEEEEQISESESEDEENEIIYNPK	EEEEEEQIS[79.9663]ESES[79.9663]EDEENEIIY[79.9663]NPK	R	N	357	381	25	3	13S(79.9663),22Y(79.9663),9S(79.9663)	sp|Q12874|SF3A3_HUMAN	Q12874	SF3A3_HUMAN	SF3A3	Splicing factor 3A subunit 3			1	0	MS/MS	STY:79.9663@EEEEEEQIS(0.7419)ES(0.7419)ES(0.7581)EDEENEIIY(0.7581)NPK;
EEEEEEQISESESEDEENEIIYNPK	EEEEEEQIS[79.9663]ES[79.9663]ESEDEENEIIYNPK	R	N	357	381	25	3	11S(79.9663),9S(79.9663)	sp|Q12874|SF3A3_HUMAN	Q12874	SF3A3_HUMAN	SF3A3	Splicing factor 3A subunit 3			2	1.624e+06	MS/MS	STY:79.9663@EEEEEEQIS(0.5494)ES(0.5494)ES(0.5494)EDEENEIIY(0.3519)NPK;
EEEEEEQISESESEDEENEIIYNPK	EEEEEEQIS[79.9663]ES[79.9663]ESEDEENEIIY[79.9663]NPK	R	N	357	381	25	3	11S(79.9663),22Y(79.9663),9S(79.9663)	sp|Q12874|SF3A3_HUMAN	Q12874	SF3A3_HUMAN	SF3A3	Splicing factor 3A subunit 3			4	2.2893636E7	MS/MS	STY:79.9663@EEEEEEQIS(0.7972)ES(0.7972)ES(0.6109)EDEENEIIY(0.7946)NPK;
EEEEEEQISESESEDEENEIIYNPK	EEEEEEQIS[79.9663]ES[79.9663]ES[79.9663]EDEENEIIYNPK	R	N	357	381	25	3	11S(79.9663),13S(79.9663),9S(79.9663)	sp|Q12874|SF3A3_HUMAN	Q12874	SF3A3_HUMAN	SF3A3	Splicing factor 3A subunit 3			4	0	MS/MS	STY:79.9663@EEEEEEQIS(0.9266)ES(0.9266)ES(0.9266)EDEENEIIY(0.2203)NPK;
EEEEGISQESSEEEQ	EEEEGISQES[79.9663]S[79.9663]EEEQ	K	-	82	96	15	2	10S(79.9663),11S(79.9663)	sp|P17096-2|HMGA1_HUMAN	P17096-2	HMGA1_HUMAN	HMGA1	Isoform HMG-Y of High mobility group protein HMG-I/HMG-Y		sp|P17096|HMGA1_HUMAN	6	8.5295608E7	MS/MS	STY:79.9663@EEEEGIS(0.1181)QES(0.9410)S(0.9410)EEEQ;
EEEEGISQESSEEEQ	EEEEGIS[79.9663]QESSEEEQ	K	-	82	96	15	2	7S(79.9663)	sp|P17096-2|HMGA1_HUMAN	P17096-2	HMGA1_HUMAN	HMGA1	Isoform HMG-Y of High mobility group protein HMG-I/HMG-Y		sp|P17096|HMGA1_HUMAN	2	5157412	MS/MS	STY:79.9663@EEEEGIS(0.3333)QES(0.3333)S(0.3333)EEEQ;
EEEEGISQESSEEEQ	EEEEGIS[79.9663]QES[79.9663]SEEEQ	K	-	82	96	15	2	10S(79.9663),7S(79.9663)	sp|P17096-2|HMGA1_HUMAN	P17096-2	HMGA1_HUMAN	HMGA1	Isoform HMG-Y of High mobility group protein HMG-I/HMG-Y		sp|P17096|HMGA1_HUMAN	10	8.6231696E7	MS/MS	STY:79.9663@EEEEGIS(0.8116)QES(0.8116)S(0.3769)EEEQ;
EEEEGISQESSEEEQ	EEEEGIS[79.9663]QES[79.9663]S[79.9663]EEEQ	K	-	82	96	15	2	10S(79.9663),11S(79.9663),7S(79.9663)	sp|P17096-2|HMGA1_HUMAN	P17096-2	HMGA1_HUMAN	HMGA1	Isoform HMG-Y of High mobility group protein HMG-I/HMG-Y		sp|P17096|HMGA1_HUMAN	5	1.9233684E7	MS/MS	STY:79.9663@EEEEGIS(1.0000)QES(1.0000)S(1.0000)EEEQ;
EEETSIDVAGKPNEVTK	EEET[79.9663]SIDVAGKPNEVTK	K	A	463	479	17	2	4T(79.9663)	sp|P53985|MOT1_HUMAN	P53985	MOT1_HUMAN	SLC16A1	Monocarboxylate transporter 1			1	0	MS/MS	STY:79.9663@EEET(0.7958)S(0.0659)IDVAGKPNEVT(0.1383)K;
EEGPPPPSPDGASSDAEPEPPSGR	EEGPPPPS[79.9663]PDGAS[79.9663]SDAEPEPPSGR	R	T	15	38	24	3	13S(79.9663),8S(79.9663)	sp|Q9NTJ3-2|SMC4_HUMAN	Q9NTJ3-2	SMC4_HUMAN	SMC4	Isoform 2 of Structural maintenance of chromosomes protein 4		sp|Q9NTJ3|SMC4_HUMAN	2	1.65695e+06	MS/MS	STY:79.9663@EEGPPPPS(0.5000)PDGAS(0.5000)S(0.5000)DAEPEPPS(0.5000)GR;
EEGPPPPSPDGASSDAEPEPPSGR	EEGPPPPS[79.9663]PDGAS[79.9663]S[79.9663]DAEPEPPSGR	R	T	15	38	24	3	13S(79.9663),14S(79.9663),8S(79.9663)	sp|Q9NTJ3-2|SMC4_HUMAN	Q9NTJ3-2	SMC4_HUMAN	SMC4	Isoform 2 of Structural maintenance of chromosomes protein 4		sp|Q9NTJ3|SMC4_HUMAN	1	1.50783e+06	MS/MS	STY:79.9663@EEGPPPPS(0.7500)PDGAS(0.7500)S(0.7500)DAEPEPPS(0.7500)GR;
EEGRCSSSDDDTDVDMEGLR	EEGRC[57.0215]S[79.9663]S[79.9663]S[79.9663]DDDTDVDMEGLR	R	R	112	131	20	3	5C(57.0215),6S(79.9663),7S(79.9663),8S(79.9663)	sp|Q96AQ6-2|PBIP1_HUMAN	Q96AQ6-2	PBIP1_HUMAN	PBXIP1	Isoform 2 of Pre-B-cell leukemia transcription factor-interacting protein 1		sp|Q96AQ6-3|PBIP1_HUMAN, sp|Q96AQ6|PBIP1_HUMAN	7	3.72201e+06	MS/MS	STY:79.9663@EEGRCS(0.7863)S(0.7863)S(0.7863)DDDT(0.6412)DVDMEGLR;
EEGSLSDTEADAVSGQLPDPTTNPSAGK	EEGSLS[79.9663]DTEADAVSGQLPDPTTNPSAGK	K	D	515	542	28	3	6S(79.9663)	sp|Q8N1G4|LRC47_HUMAN	Q8N1G4	LRC47_HUMAN	LRRC47	Leucine-rich repeat-containing protein 47			1	1.6610622E7	MS/MS	STY:79.9663@EEGS(0.0106)LS(0.4734)DT(0.4734)EADAVS(0.0193)GQLPDPT(0.0075)T(0.0075)NPS(0.0082)AGK;
EEGSLSDTEADAVSGQLPDPTTNPSAGK	EEGS[79.9663]LS[79.9663]DTEADAVSGQLPDPTTNPSAGK	K	D	515	542	28	3	4S(79.9663),6S(79.9663)	sp|Q8N1G4|LRC47_HUMAN	Q8N1G4	LRC47_HUMAN	LRRC47	Leucine-rich repeat-containing protein 47			2	6501529	MS/MS	STY:79.9663@EEGS(0.6728)LS(0.6728)DT(0.3286)EADAVS(0.0911)GQLPDPT(0.0782)T(0.0782)NPS(0.0782)AGK;
EELMSSDLEETAGSTSIPK	EELMSSDLEETAGS[79.9663]TSIPK	K	R	515	533	19	2	14S(79.9663)	sp|O00567|NOP56_HUMAN	O00567	NOP56_HUMAN	NOP56	Nucleolar protein 56			1	7990271	MS/MS	STY:79.9663@EELMS(0.0447)S(0.0447)DLEET(0.0447)AGS(0.2886)T(0.2886)S(0.2886)IPK;
EELMSSDLEETAGSTSIPK	EELMS[79.9663]SDLEETAGSTSIPK	K	R	515	533	19	2,3	5S(79.9663)	sp|O00567|NOP56_HUMAN	O00567	NOP56_HUMAN	NOP56	Nucleolar protein 56			4	9314508	MS/MS	STY:79.9663@EELMS(0.4649)S(0.4649)DLEET(0.0176)AGS(0.0176)T(0.0176)S(0.0176)IPK;
EELMSSDLEETAGSTSIPK	EELMS[79.9663]S[79.9663]DLEETAGSTSIPK	K	R	515	533	19	2	5S(79.9663),6S(79.9663)	sp|O00567|NOP56_HUMAN	O00567	NOP56_HUMAN	NOP56	Nucleolar protein 56			2	7561829	MS/MS	STY:79.9663@EELMS(0.7640)S(0.7640)DLEET(0.2909)AGS(0.0604)T(0.0604)S(0.0604)IPK;
EELMSSDLEETAGSTSIPK	EELM[15.9949]S[79.9663]SDLEETAGSTSIPK	K	R	515	533	19	2	4M(15.9949),5S(79.9663)	sp|O00567|NOP56_HUMAN	O00567	NOP56_HUMAN	NOP56	Nucleolar protein 56			1	8975040	MS/MS	STY:79.9663@EELMS(0.4187)S(0.4187)DLEET(0.0406)AGS(0.0406)T(0.0406)S(0.0406)IPK;M:15.9949@EELM(1.0000)SSDLEETAGSTSIPK;
EELQANGSAPAADKEEPAAAGSGAASPSAAEK	EELQANGSAPAADKEEPAAAGS[79.9663]GAASPSAAEK	K	G	56	87	32	3	22S(79.9663)	sp|P29966|MARCS_HUMAN	P29966	MARCS_HUMAN	MARCKS	Myristoylated alanine-rich C-kinase substrate			1	0	MS/MS	STY:79.9663@EELQANGS(0.0979)APAADKEEPAAAGS(0.3007)GAAS(0.3007)PS(0.3007)AAEK;
EEPAAAGSGAASPSAAEK	EEPAAAGS[79.9663]GAASPSAAEK	K	G	70	87	18	2	8S(79.9663)	sp|P29966|MARCS_HUMAN	P29966	MARCS_HUMAN	MARCKS	Myristoylated alanine-rich C-kinase substrate			1	2.61098e+06	MS/MS	STY:79.9663@EEPAAAGS(0.3333)GAAS(0.3333)PS(0.3333)AAEK;
EEPSQNDISPK	EEPSQNDIS[79.9663]PK	K	T	13	23	11	2	9S(79.9663)	sp|Q9NR30-2|DDX21_HUMAN	Q9NR30-2	DDX21_HUMAN	DDX21	Isoform 2 of Nucleolar RNA helicase 2		sp|Q9NR30|DDX21_HUMAN	5	1.9569144E7	MS/MS	STY:79.9663@EEPS(0.0736)QNDIS(0.9264)PK;
EEPSQNDISPK	EEPS[79.9663]QNDISPK	K	T	13	23	11	2	4S(79.9663)	sp|Q9NR30-2|DDX21_HUMAN	Q9NR30-2	DDX21_HUMAN	DDX21	Isoform 2 of Nucleolar RNA helicase 2		sp|Q9NR30|DDX21_HUMAN	3	1.9569144E7	MS/MS	STY:79.9663@EEPS(0.8078)QNDIS(0.1922)PK;
EESDDEAAVEEEEEEK	EES[79.9663]DDEAAVEEEEEEK	K	K	304	319	16	2	3S(79.9663)	sp|P14625|ENPL_HUMAN	P14625	ENPL_HUMAN	HSP90B1	Endoplasmin			1	0	MS/MS	STY:79.9663@EES(1.0000)DDEAAVEEEEEEK;
EESDGEYDEFGR	EES[79.9663]DGEYDEFGR	R	K	118	129	12	2	3S(79.9663)	sp|O95218-2|ZRAB2_HUMAN	O95218-2	ZRAB2_HUMAN	ZRANB2	Isoform 2 of Zinc finger Ran-binding domain-containing protein 2		sp|O95218|ZRAB2_HUMAN	2	2.40645e+06	MS/MS	STY:79.9663@EES(0.8741)DGEY(0.1259)DEFGR;
EESEEEEDEDDEEEEEEEK	EES[79.9663]EEEEDEDDEEEEEEEK	R	G	30	48	19	2	3S(79.9663)	sp|P35659-2|DEK_HUMAN	P35659-2	DEK_HUMAN	DEK	Isoform 2 of Protein DEK		sp|P35659|DEK_HUMAN	1	4612674	MS/MS	STY:79.9663@EES(1.0000)EEEEDEDDEEEEEEEK;
EESEESDEDMGFGLFD	EES[79.9663]EES[79.9663]DEDM[15.9949]GFGLFD	K	-	302	317	16	2	10M(15.9949),3S(79.9663),6S(79.9663)	sp|P05388|RLA0_HUMAN	P05388	RLA0_HUMAN	RPLP0	Large ribosomal subunit protein uL10	RPLP0P6	sp|P05388-2|RLA0_HUMAN, sp|Q8NHW5|RLA0L_HUMAN	2	0	MS/MS	STY:79.9663@EES(1.0000)EES(1.0000)DEDMGFGLFD;M:15.9949@EESEESDEDM(1.0000)GFGLFD;
EESEESEAEPVQR	EES[79.9663]EES[79.9663]EAEPVQR	R	T	194	206	13	2	3S(79.9663),6S(79.9663)	sp|Q9BW71|HIRP3_HUMAN	Q9BW71	HIRP3_HUMAN	HIRIP3	HIRA-interacting protein 3			1	1.81867e+06	MS/MS	STY:79.9663@EES(1.0000)EES(1.0000)EAEPVQR;
EFITGDVEPTDAESEWHSENEEEEK	EFITGDVEPTDAESEWHS[79.9663]ENEEEEK	R	L	108	132	25	3	18S(79.9663)	sp|Q99733-2|NP1L4_HUMAN	Q99733-2	NP1L4_HUMAN	NAP1L4	Isoform 2 of Nucleosome assembly protein 1-like 4		sp|Q99733|NP1L4_HUMAN	4	5.2648732E7	MS/MS	STY:79.9663@EFIT(0.0245)GDVEPT(0.0368)DAES(0.0368)EWHS(0.9019)ENEEEEK;
EFITGDVEPTDAESEWHSENEEEEK	EFITGDVEPT[79.9663]DAESEWHSENEEEEK	R	L	108	132	25	3	10T(79.9663)	sp|Q99733-2|NP1L4_HUMAN	Q99733-2	NP1L4_HUMAN	NAP1L4	Isoform 2 of Nucleosome assembly protein 1-like 4		sp|Q99733|NP1L4_HUMAN	1	3.8353696E7	MS/MS	STY:79.9663@EFIT(0.0164)GDVEPT(0.3279)DAES(0.3279)EWHS(0.3279)ENEEEEK;
EFITGDVEPTDAESEWHSENEEEEK	EFIT[79.9663]GDVEPTDAESEWHSENEEEEK	R	L	108	132	25	3	4T(79.9663)	sp|Q99733-2|NP1L4_HUMAN	Q99733-2	NP1L4_HUMAN	NAP1L4	Isoform 2 of Nucleosome assembly protein 1-like 4		sp|Q99733|NP1L4_HUMAN	1	3.8430224E7	MS/MS	STY:79.9663@EFIT(0.2500)GDVEPT(0.2500)DAES(0.2500)EWHS(0.2500)ENEEEEK;
EFSGPSTPTGTLEFEGGEVSLEGGK	EFSGPSTPT[79.9663]GTLEFEGGEVSLEGGK	R	V	5788	5812	25	3	9T(79.9663)	sp|Q09666|AHNK_HUMAN	Q09666	AHNK_HUMAN	AHNAK	Neuroblast differentiation-associated protein AHNAK			1	0	MS/MS	STY:79.9663@EFS(0.0234)GPS(0.0234)T(0.0234)PT(0.4559)GT(0.4559)LEFEGGEVS(0.0181)LEGGK;
EGAASPAPETPQPTSPETSPK	EGAASPAPETPQPT[79.9663]SPETSPK	K	E	372	392	21	3	14T(79.9663)	sp|Q9Y3X0|CCDC9_HUMAN	Q9Y3X0	CCDC9_HUMAN	CCDC9	Coiled-coil domain-containing protein 9			1	706683	MS/MS	STY:79.9663@EGAAS(0.0109)PAPET(0.0109)PQPT(0.3571)S(0.3571)PET(0.1321)S(0.1321)PK;
EGDVDVSDSDDEDDNLPANFDTCHR	EGDVDVS[79.9663]DS[79.9663]DDEDDNLPANFDTC[57.0215]HR	K	A	164	188	25	3	23C(57.0215),7S(79.9663),9S(79.9663)	sp|Q9NYV6-2|RRN3_HUMAN	Q9NYV6-2	RRN3_HUMAN	RRN3	Isoform 2 of RNA polymerase I-specific transcription initiation factor RRN3		sp|Q9NYV6-3|RRN3_HUMAN, sp|Q9NYV6-4|RRN3_HUMAN, sp|Q9NYV6|RRN3_HUMAN	1	4607885	MS/MS	STY:79.9663@EGDVDVS(0.8332)DS(0.8340)DDEDDNLPANFDT(0.3328)CHR;
EGEDGDQPTTPPKPLK	EGEDGDQPT[79.9663]TPPKPLK	K	T	174	189	16	2,3	9T(79.9663)	sp|P18858-2|DNLI1_HUMAN	P18858-2	DNLI1_HUMAN	LIG1	Isoform 2 of DNA ligase 1		sp|P18858-3|DNLI1_HUMAN, sp|P18858|DNLI1_HUMAN	2	4.54503e+06	MS/MS	STY:79.9663@EGEDGDQPT(0.5000)T(0.5000)PPKPLK;
EGEELGEGERPEEDAAALELSSDEAVEVEEVIEESR	EGEELGEGERPEEDAAALELS[79.9663]S[79.9663]DEAVEVEEVIEESR	K	A	182	217	36	3	21S(79.9663),22S(79.9663)	sp|Q6NZI2|CAVN1_HUMAN	Q6NZI2	CAVN1_HUMAN	CAVIN1	Caveolae-associated protein 1			2	0	MS/MS	STY:79.9663@EGEELGEGERPEEDAAALELS(0.9460)S(0.9460)DEAVEVEEVIEES(0.1080)R;
EGEEPTVYSDEEEPKDESAR	EGEEPTVYSDEEEPKDES[79.9663]AR	K	K	121	140	20	3	18S(79.9663)	sp|O00264-2|PGRC1_HUMAN	O00264-2	PGRC1_HUMAN	PGRMC1	Isoform 2 of Membrane-associated progesterone receptor component 1		sp|O00264|PGRC1_HUMAN	1	3.502276E7	MS/MS	STY:79.9663@EGEEPT(0.0767)VY(0.0842)S(0.0856)DEEEPKDES(0.7536)AR;
EGEEPTVYSDEEEPK	EGEEPTVY[79.9663]SDEEEPK	K	D	121	135	15	2	8Y(79.9663)	sp|O00264-2|PGRC1_HUMAN	O00264-2	PGRC1_HUMAN	PGRMC1	Isoform 2 of Membrane-associated progesterone receptor component 1		sp|O00264|PGRC1_HUMAN	1	3.8776E7	MS/MS	STY:79.9663@EGEEPT(0.0679)VY(0.8470)S(0.0850)DEEEPK;
EGEEPTVYSDEEEPKDESAR	EGEEPTVY[79.9663]SDEEEPKDESAR	K	K	121	140	20	3	8Y(79.9663)	sp|O00264-2|PGRC1_HUMAN	O00264-2	PGRC1_HUMAN	PGRMC1	Isoform 2 of Membrane-associated progesterone receptor component 1		sp|O00264|PGRC1_HUMAN	1	3.502276E7	MS/MS	STY:79.9663@EGEEPT(0.0214)VY(0.4829)S(0.4829)DEEEPKDES(0.0128)AR;
EGEEPTVYSDEEEPK	EGEEPT[79.9663]VYSDEEEPK	K	D	121	135	15	2	6T(79.9663)	sp|O00264-2|PGRC1_HUMAN	O00264-2	PGRC1_HUMAN	PGRMC1	Isoform 2 of Membrane-associated progesterone receptor component 1		sp|O00264|PGRC1_HUMAN	4	3.8776E7	MS/MS	STY:79.9663@EGEEPT(0.6924)VY(0.1538)S(0.1538)DEEEPK;
EGEEPTVYSDEEEPKDESAR	EGEEPT[79.9663]VYSDEEEPKDESAR	K	K	121	140	20	2,3	6T(79.9663)	sp|O00264-2|PGRC1_HUMAN	O00264-2	PGRC1_HUMAN	PGRMC1	Isoform 2 of Membrane-associated progesterone receptor component 1		sp|O00264|PGRC1_HUMAN	3	4.483662E7	MS/MS	STY:79.9663@EGEEPT(0.3299)VY(0.3299)S(0.3299)DEEEPKDES(0.0102)AR;
EGEETEGSEEDDKENDKTEEMPNDSVLENK	EGEET[79.9663]EGS[79.9663]EEDDKENDKTEEMPNDSVLENK	K	S	475	504	30	3,4	5T(79.9663),8S(79.9663)	sp|P49321-3|NASP_HUMAN	P49321-3	NASP_HUMAN	NASP	Isoform 3 of Nuclear autoantigenic sperm protein		sp|P49321-4|NASP_HUMAN, sp|P49321|NASP_HUMAN	4	7.29152e+06	MS/MS	STY:79.9663@EGEET(0.8194)EGS(0.8194)EEDDKENDKT(0.1806)EEMPNDS(0.1806)VLENK;
EGEETEGSEEDDKENDKTEEMPNDSVLENK	EGEET[79.9663]EGS[79.9663]EEDDKENDKTEEM[15.9949]PNDSVLENK	K	S	475	504	30	3,4	21M(15.9949),5T(79.9663),8S(79.9663)	sp|P49321-3|NASP_HUMAN	P49321-3	NASP_HUMAN	NASP	Isoform 3 of Nuclear autoantigenic sperm protein		sp|P49321-4|NASP_HUMAN, sp|P49321|NASP_HUMAN	2	2.49464e+06	MS/MS	STY:79.9663@EGEET(0.8425)EGS(0.8425)EEDDKENDKT(0.1803)EEMPNDS(0.1347)VLENK;M:15.9949@EGEETEGSEEDDKENDKTEEM(1.0000)PNDSVLENK;
EGETQGVAFEHESPADFQNSQSPVQDQDK	EGETQGVAFEHESPADFQNS[79.9663]QSPVQDQDK	R	S	341	369	29	3	20S(79.9663)	sp|P78332|RBM6_HUMAN	P78332	RBM6_HUMAN	RBM6	RNA-binding protein 6		sp|P78332-3|RBM6_HUMAN	1	2.40226e+06	MS/MS	STY:79.9663@EGET(0.0248)QGVAFEHES(0.0248)PADFQNS(0.4752)QS(0.4752)PVQDQDK;
EGHSLEMENENLVENGADSDEDDNSFLK	EGHSLEMENENLVENGADSDEDDNS[79.9663]FLK	K	Q	508	535	28	3	25S(79.9663)	sp|Q9UHB6-2|LIMA1_HUMAN	Q9UHB6-2	LIMA1_HUMAN	LIMA1	Isoform Alpha of LIM domain and actin-binding protein 1		sp|Q9UHB6-3|LIMA1_HUMAN, sp|Q9UHB6-4|LIMA1_HUMAN, sp|Q9UHB6-5|LIMA1_HUMAN, sp|Q9UHB6|LIMA1_HUMAN	1	0	MS/MS	STY:79.9663@EGHS(0.0511)LEMENENLVENGADS(0.0544)DEDDNS(0.8945)FLK;
EGHSLEMENENLVENGADSDEDDNSFLK	EGHSLEMENENLVENGADS[79.9663]DEDDNSFLK	K	Q	508	535	28	3	19S(79.9663)	sp|Q9UHB6-2|LIMA1_HUMAN	Q9UHB6-2	LIMA1_HUMAN	LIMA1	Isoform Alpha of LIM domain and actin-binding protein 1		sp|Q9UHB6-3|LIMA1_HUMAN, sp|Q9UHB6-4|LIMA1_HUMAN, sp|Q9UHB6-5|LIMA1_HUMAN, sp|Q9UHB6|LIMA1_HUMAN	3	1.5667538E7	MS/MS	STY:79.9663@EGHS(0.3843)LEMENENLVENGADS(0.5848)DEDDNS(0.0309)FLK;
EGHSLEMENENLVENGADSDEDDNSFLK	EGHSLEM[15.9949]ENENLVENGADSDEDDNS[79.9663]FLK	K	Q	508	535	28	3	25S(79.9663),7M(15.9949)	sp|Q9UHB6-2|LIMA1_HUMAN	Q9UHB6-2	LIMA1_HUMAN	LIMA1	Isoform Alpha of LIM domain and actin-binding protein 1		sp|Q9UHB6-3|LIMA1_HUMAN, sp|Q9UHB6-4|LIMA1_HUMAN, sp|Q9UHB6-5|LIMA1_HUMAN, sp|Q9UHB6|LIMA1_HUMAN	1	9580770	MS/MS	STY:79.9663@EGHS(0.1029)LEMENENLVENGADS(0.1029)DEDDNS(0.7941)FLK;M:15.9949@EGHSLEM(1.0000)ENENLVENGADSDEDDNSFLK;
EGHSLEMENENLVENGADSDEDDNSFLK	EGHSLEM[15.9949]ENENLVENGADS[79.9663]DEDDNSFLK	K	Q	508	535	28	3	19S(79.9663),7M(15.9949)	sp|Q9UHB6-2|LIMA1_HUMAN	Q9UHB6-2	LIMA1_HUMAN	LIMA1	Isoform Alpha of LIM domain and actin-binding protein 1		sp|Q9UHB6-3|LIMA1_HUMAN, sp|Q9UHB6-4|LIMA1_HUMAN, sp|Q9UHB6-5|LIMA1_HUMAN, sp|Q9UHB6|LIMA1_HUMAN	5	9580770	MS/MS	STY:79.9663@EGHS(0.0452)LEMENENLVENGADS(0.8957)DEDDNS(0.0591)FLK;M:15.9949@EGHSLEM(1.0000)ENENLVENGADSDEDDNSFLK;
EGHSLEMENENLVENGADSDEDDNSFLK	EGHS[79.9663]LEMENENLVENGADSDEDDNSFLK	K	Q	508	535	28	3	4S(79.9663)	sp|Q9UHB6-2|LIMA1_HUMAN	Q9UHB6-2	LIMA1_HUMAN	LIMA1	Isoform Alpha of LIM domain and actin-binding protein 1		sp|Q9UHB6-3|LIMA1_HUMAN, sp|Q9UHB6-4|LIMA1_HUMAN, sp|Q9UHB6-5|LIMA1_HUMAN, sp|Q9UHB6|LIMA1_HUMAN	3	1.4261937E7	MS/MS	STY:79.9663@EGHS(0.7142)LEMENENLVENGADS(0.1429)DEDDNS(0.1429)FLK;
EGMNPSYDEYADSDEDQHDAYLER	EGMNPSYDEYADSDEDQHDAY[79.9663]LER	K	M	432	455	24	3	21Y(79.9663)	sp|Q08945|SSRP1_HUMAN	Q08945	SSRP1_HUMAN	SSRP1	FACT complex subunit SSRP1			3	3.8699464E7	MS/MS	STY:79.9663@EGMNPS(0.1331)Y(0.0347)DEY(0.1142)ADS(0.1142)DEDQHDAY(0.6038)LER;
EGMNPSYDEYADSDEDQHDAYLER	EGMNPSYDEYADS[79.9663]DEDQHDAYLER	K	M	432	455	24	3	13S(79.9663)	sp|Q08945|SSRP1_HUMAN	Q08945	SSRP1_HUMAN	SSRP1	FACT complex subunit SSRP1			1	3.8699464E7	MS/MS	STY:79.9663@EGMNPS(0.1197)Y(0.1197)DEY(0.1197)ADS(0.3204)DEDQHDAY(0.3204)LER;
EGMNPSYDEYADSDEDQHDAYLER	EGMNPSYDEY[79.9663]ADSDEDQHDAYLER	K	M	432	455	24	3	10Y(79.9663)	sp|Q08945|SSRP1_HUMAN	Q08945	SSRP1_HUMAN	SSRP1	FACT complex subunit SSRP1			4	4.67552E7	MS/MS	STY:79.9663@EGMNPS(0.0166)Y(0.0166)DEY(0.4597)ADS(0.4597)DEDQHDAY(0.0473)LER;
EGMNPSYDEYADSDEDQHDAYLER	EGMNPSY[79.9663]DEYADSDEDQHDAYLER	K	M	432	455	24	3	7Y(79.9663)	sp|Q08945|SSRP1_HUMAN	Q08945	SSRP1_HUMAN	SSRP1	FACT complex subunit SSRP1			1	3.8651096E7	MS/MS	STY:79.9663@EGMNPS(0.0090)Y(0.3268)DEY(0.3268)ADS(0.3268)DEDQHDAY(0.0107)LER;
EGMNPSYDEYADSDEDQHDAYLER	EGM[15.9949]NPSYDEYADS[79.9663]DEDQHDAYLER	K	M	432	455	24	3	13S(79.9663),3M(15.9949)	sp|Q08945|SSRP1_HUMAN	Q08945	SSRP1_HUMAN	SSRP1	FACT complex subunit SSRP1			1	2.5521356E7	MS/MS	STY:79.9663@EGMNPS(0.1223)Y(0.1223)DEY(0.1223)ADS(0.6119)DEDQHDAY(0.0212)LER;M:15.9949@EGM(1.0000)NPSYDEYADSDEDQHDAYLER;
EGMNPSYDEYADSDEDQHDAYLER	EGM[15.9949]NPS[79.9663]YDEYADSDEDQHDAYLER	K	M	432	455	24	3	3M(15.9949),6S(79.9663)	sp|Q08945|SSRP1_HUMAN	Q08945	SSRP1_HUMAN	SSRP1	FACT complex subunit SSRP1			4	3.5895848E7	MS/MS	STY:79.9663@EGMNPS(0.7528)Y(0.1371)DEY(0.0468)ADS(0.0468)DEDQHDAY(0.0165)LER;M:15.9949@EGM(1.0000)NPSYDEYADSDEDQHDAYLER;
EGSPAPLEPEPGAAQPK	EGS[79.9663]PAPLEPEPGAAQPK	R	L	396	412	17	2	3S(79.9663)	sp|Q01167-2|FOXK2_HUMAN	Q01167-2	FOXK2_HUMAN	FOXK2	Isoform 2 of Forkhead box protein K2		sp|Q01167|FOXK2_HUMAN	1	0	MS/MS	STY:79.9663@EGS(1.0000)PAPLEPEPGAAQPK;
EGTQASEGYFSQSQEEEFAQSEELCAK	EGTQASEGYFSQS[79.9663]QEEEFAQSEELC[57.0215]AK	K	A	591	617	27	3	13S(79.9663),25C(57.0215)	sp|Q16643-2|DREB_HUMAN	Q16643-2	DREB_HUMAN	DBN1	Isoform 2 of Drebrin		sp|Q16643-3|DREB_HUMAN, sp|Q16643|DREB_HUMAN	1	1.56248e+06	MS/MS	STY:79.9663@EGT(0.1611)QAS(0.1611)EGY(0.1611)FS(0.1611)QS(0.1778)QEEEFAQS(0.1778)EELCAK;
EHHPEEGSSGSEVEEIPETPCESQGEELK	EHHPEEGSS[79.9663]GS[79.9663]EVEEIPET[79.9663]PC[57.0215]ESQGEELK	K	E	657	685	29	3	11S(79.9663),19T(79.9663),21C(57.0215),9S(79.9663)	sp|Q12888-2|TP53B_HUMAN	Q12888-2	TP53B_HUMAN	TP53BP1	Isoform 2 of TP53-binding protein 1		sp|Q12888-3|TP53B_HUMAN, sp|Q12888|TP53B_HUMAN	1	0	MS/MS	STY:79.9663@EHHPEEGS(0.5294)S(0.7441)GS(0.7441)EVEEIPET(0.7496)PCES(0.2329)QGEELK;
EHHPEEGSSGSEVEEIPETPCESQGEELK	EHHPEEGS[79.9663]SGSEVEEIPET[79.9663]PC[57.0215]ES[79.9663]QGEELK	K	E	657	685	29	3	19T(79.9663),21C(57.0215),23S(79.9663),8S(79.9663)	sp|Q12888-2|TP53B_HUMAN	Q12888-2	TP53B_HUMAN	TP53BP1	Isoform 2 of TP53-binding protein 1		sp|Q12888-3|TP53B_HUMAN, sp|Q12888|TP53B_HUMAN	1	2.3215468E7	MS/MS	STY:79.9663@EHHPEEGS(0.5875)S(0.5875)GS(0.5875)EVEEIPET(0.6187)PCES(0.6187)QGEELK;
EHHPEEGSSGSEVEEIPETPCESQGEELK	EHHPEEGS[79.9663]S[79.9663]GSEVEEIPET[79.9663]PC[57.0215]ESQGEELK	K	E	657	685	29	3	19T(79.9663),21C(57.0215),8S(79.9663),9S(79.9663)	sp|Q12888-2|TP53B_HUMAN	Q12888-2	TP53B_HUMAN	TP53BP1	Isoform 2 of TP53-binding protein 1		sp|Q12888-3|TP53B_HUMAN, sp|Q12888|TP53B_HUMAN	1	2.3215468E7	MS/MS	STY:79.9663@EHHPEEGS(0.6659)S(0.6659)GS(0.6659)EVEEIPET(0.6989)PCES(0.3034)QGEELK;
EHHPEEGSSGSEVEEIPETPCESQGEELK	EHHPEEGS[79.9663]S[79.9663]GS[79.9663]EVEEIPETPC[57.0215]ESQGEELK	K	E	657	685	29	3	11S(79.9663),21C(57.0215),8S(79.9663),9S(79.9663)	sp|Q12888-2|TP53B_HUMAN	Q12888-2	TP53B_HUMAN	TP53BP1	Isoform 2 of TP53-binding protein 1		sp|Q12888-3|TP53B_HUMAN, sp|Q12888|TP53B_HUMAN	10	5.3258248E7	MS/MS	STY:79.9663@EHHPEEGS(0.9442)S(0.9442)GS(0.9442)EVEEIPET(0.0847)PCES(0.0827)QGEELK;
EHYPVSSPSSPSPPAQPGGVSR	EHYPVSSPSS[79.9663]PS[79.9663]PPAQPGGVS[79.9663]R	K	N	2035	2056	22	3	10S(79.9663),12S(79.9663),21S(79.9663)	sp|O75179-2|ANR17_HUMAN	O75179-2	ANR17_HUMAN	ANKRD17	Isoform 2 of Ankyrin repeat domain-containing protein 17		sp|O75179-4|ANR17_HUMAN, sp|O75179-6|ANR17_HUMAN, sp|O75179-7|ANR17_HUMAN, sp|O75179|ANR17_HUMAN	1	444799	MS/MS	STY:79.9663@EHY(0.3759)PVS(0.3759)S(0.3759)PS(0.3759)S(0.4996)PS(0.4996)PPAQPGGVS(0.4973)R;
EHYPVSSPSSPSPPAQPGGVSR	EHY[79.9663]PVS[79.9663]SPSSPSPPAQPGGVSR	K	N	2035	2056	22	3	3Y(79.9663),6S(79.9663)	sp|O75179-2|ANR17_HUMAN	O75179-2	ANR17_HUMAN	ANKRD17	Isoform 2 of Ankyrin repeat domain-containing protein 17		sp|O75179-4|ANR17_HUMAN, sp|O75179-6|ANR17_HUMAN, sp|O75179-7|ANR17_HUMAN, sp|O75179|ANR17_HUMAN	1	2935727	MS/MS	STY:79.9663@EHY(0.3278)PVS(0.3278)S(0.3278)PS(0.3278)S(0.3278)PS(0.3278)PPAQPGGVS(0.0332)R;
EHYPVSSPSSPSPPAQPGGVSR	EHY[79.9663]PVS[79.9663]SPSSPSPPAQPGGVS[79.9663]R	K	N	2035	2056	22	3	21S(79.9663),3Y(79.9663),6S(79.9663)	sp|O75179-2|ANR17_HUMAN	O75179-2	ANR17_HUMAN	ANKRD17	Isoform 2 of Ankyrin repeat domain-containing protein 17		sp|O75179-4|ANR17_HUMAN, sp|O75179-6|ANR17_HUMAN, sp|O75179-7|ANR17_HUMAN, sp|O75179|ANR17_HUMAN	1	2588552	MS/MS	STY:79.9663@EHY(0.4241)PVS(0.4241)S(0.4241)PS(0.4241)S(0.4241)PS(0.4241)PPAQPGGVS(0.4553)R;
EIAIVHSDAEK	EIAIVHS[79.9663]DAEK	K	E	341	351	11	2	7S(79.9663)	sp|Q9H307|PININ_HUMAN	Q9H307	PININ_HUMAN	PNN	Pinin			6	1.1729541E7	MS/MS	STY:79.9663@EIAIVHS(1.0000)DAEK;
EIPEDVDMEEEKESEDSDEENDFTEK	EIPEDVDMEEEKES[79.9663]EDS[79.9663]DEENDFTEK	K	V	766	791	26	3	14S(79.9663),17S(79.9663)	sp|Q8IWA0|WDR75_HUMAN	Q8IWA0	WDR75_HUMAN	WDR75	WD repeat-containing protein 75			5	2.7085854E7	MS/MS	STY:79.9663@EIPEDVDMEEEKES(0.9273)EDS(0.9273)DEENDFT(0.1455)EK;
EIPSATQSPISK	EIPS[79.9663]ATQSPISK	K	K	1156	1167	12	2	4S(79.9663)	sp|Q9BQG0-2|MBB1A_HUMAN	Q9BQG0-2	MBB1A_HUMAN	MYBBP1A	Isoform 2 of Myb-binding protein 1A		sp|Q9BQG0|MBB1A_HUMAN	2	5165205	MS/MS	STY:79.9663@EIPS(0.2500)AT(0.2500)QS(0.2500)PIS(0.2500)K;
EIQNGNLHESDSESVPR	EIQNGNLHES[79.9663]DSESVPR	K	D	66	82	17	2,3	10S(79.9663)	sp|Q86UP2-2|KTN1_HUMAN	Q86UP2-2	KTN1_HUMAN	KTN1	Isoform 2 of Kinectin		sp|Q86UP2-3|KTN1_HUMAN, sp|Q86UP2-4|KTN1_HUMAN, sp|Q86UP2|KTN1_HUMAN	5	1.4014236E7	MS/MS	STY:79.9663@EIQNGNLHES(0.8555)DS(0.0722)ES(0.0722)VPR;
EIQNMDDNIDETYGVNVQFESDEEEGDEDVYGEVR	EIQNMDDNIDETYGVNVQFESDEEEGDEDVY[79.9663]GEVR	K	E	187	221	35	3	31Y(79.9663)	sp|O75643-2|U520_HUMAN	O75643-2	U520_HUMAN	SNRNP200	Isoform 2 of U5 small nuclear ribonucleoprotein 200 kDa helicase		sp|O75643|U520_HUMAN	1	2.288746E7	MS/MS	STY:79.9663@EIQNMDDNIDET(0.2296)Y(0.2296)GVNVQFES(0.2687)DEEEGDEDVY(0.2721)GEVR;
EIQNMDDNIDETYGVNVQFESDEEEGDEDVYGEVR	EIQNMDDNIDETY[79.9663]GVNVQFESDEEEGDEDVYGEVR	K	E	187	221	35	3	13Y(79.9663)	sp|O75643-2|U520_HUMAN	O75643-2	U520_HUMAN	SNRNP200	Isoform 2 of U5 small nuclear ribonucleoprotein 200 kDa helicase		sp|O75643|U520_HUMAN	1	1.2106028E7	MS/MS	STY:79.9663@EIQNMDDNIDET(0.0723)Y(0.4555)GVNVQFES(0.4555)DEEEGDEDVY(0.0167)GEVR;
EIQNMDDNIDETYGVNVQFESDEEEGDEDVYGEVR	EIQNMDDNIDET[79.9663]YGVNVQFESDEEEGDEDVYGEVR	K	E	187	221	35	3	12T(79.9663)	sp|O75643-2|U520_HUMAN	O75643-2	U520_HUMAN	SNRNP200	Isoform 2 of U5 small nuclear ribonucleoprotein 200 kDa helicase		sp|O75643|U520_HUMAN	4	1.2106028E7	MS/MS	STY:79.9663@EIQNMDDNIDET(0.4759)Y(0.4759)GVNVQFES(0.0302)DEEEGDEDVY(0.0179)GEVR;
EIQNMDDNIDETYGVNVQFESDEEEGDEDVYGEVR	EIQNM[15.9949]DDNIDETYGVNVQFESDEEEGDEDVY[79.9663]GEVR	K	E	187	221	35	3	31Y(79.9663),5M(15.9949)	sp|O75643-2|U520_HUMAN	O75643-2	U520_HUMAN	SNRNP200	Isoform 2 of U5 small nuclear ribonucleoprotein 200 kDa helicase		sp|O75643|U520_HUMAN	1	0	MS/MS	STY:79.9663@EIQNMDDNIDET(0.0477)Y(0.0477)GVNVQFES(0.0477)DEEEGDEDVY(0.8570)GEVR;M:15.9949@EIQNM(1.0000)DDNIDETYGVNVQFESDEEEGDEDVYGEVR;
EISDDEAEEEK	EIS[79.9663]DDEAEEEK	K	G	224	234	11	2	3S(79.9663)	sp|P08238|HS90B_HUMAN	P08238	HS90B_HUMAN	HSP90AB1	Heat shock protein HSP 90-beta	HSP90AB3P	sp|Q58FF7|H90B3_HUMAN	23	4.70491104E8	MS/MS	STY:79.9663@EIS(1.0000)DDEAEEEK;
EISPGSGPGEIR	EIS[79.9663]PGSGPGEIR	K	K	643	654	12	2	3S(79.9663)	sp|O43491-4|E41L2_HUMAN	O43491-4	E41L2_HUMAN	EPB41L2	Isoform 4 of Band 4.1-like protein 2		sp|O43491|E41L2_HUMAN	1	1.11591e+06	MS/MS	STY:79.9663@EIS(0.5000)PGS(0.5000)GPGEIR;
EISSSPTSK	EIS[79.9663]S[79.9663]SPTSK	R	N	452	460	9	2	3S(79.9663),4S(79.9663)	sp|Q9UQ35|SRRM2_HUMAN	Q9UQ35	SRRM2_HUMAN	SRRM2	Serine/arginine repetitive matrix protein 2		sp|Q9UQ35-2|SRRM2_HUMAN	1	1.1399e+06	MS/MS	STY:79.9663@EIS(0.4000)S(0.4000)S(0.4000)PT(0.4000)S(0.4000)K;
EISSSPESCPEEIK	EIS[79.9663]S[79.9663]S[79.9663]PESC[57.0215]PEEIK	R	H	517	530	14	2	3S(79.9663),4S(79.9663),5S(79.9663),9C(57.0215)	sp|Q92889|XPF_HUMAN	Q92889	XPF_HUMAN	ERCC4	DNA repair endonuclease XPF			1	2.72457e+06	MS/MS	STY:79.9663@EIS(0.7500)S(0.7500)S(0.7500)PES(0.7500)CPEEIK;
EKEISDDEAEEEK	EKEIS[79.9663]DDEAEEEK	R	G	222	234	13	2	5S(79.9663)	sp|P08238|HS90B_HUMAN	P08238	HS90B_HUMAN	HSP90AB1	Heat shock protein HSP 90-beta			1	2585529	MS/MS	STY:79.9663@EKEIS(1.0000)DDEAEEEK;
EKTPELPEPSVK	EKT[79.9663]PELPEPSVK	K	V	218	229	12	2	3T(79.9663)	sp|Q8IYB3|SRRM1_HUMAN	Q8IYB3	SRRM1_HUMAN	SRRM1	Serine/arginine repetitive matrix protein 1		sp|Q8IYB3-2|SRRM1_HUMAN	4	7199740	MS/MS	STY:79.9663@EKT(0.8418)PELPEPS(0.1582)VK;
EKTPSPKEEDEEPESPPEK	EKT[79.9663]PSPKEEDEEPES[79.9663]PPEK	K	K	200	218	19	3	15S(79.9663),3T(79.9663)	sp|Q9H1E3|NUCKS_HUMAN	Q9H1E3	NUCKS_HUMAN	NUCKS1	Nuclear ubiquitous casein and cyclin-dependent kinase substrate 1		sp|Q9H1E3-2|NUCKS_HUMAN	2	5.25704e+06	MS/MS	STY:79.9663@EKT(0.6600)PS(0.6600)PKEEDEEPES(0.6799)PPEK;
EKTPSPKEEDEEPESPPEK	EKT[79.9663]PS[79.9663]PKEEDEEPESPPEK	K	K	200	218	19	3	3T(79.9663),5S(79.9663)	sp|Q9H1E3|NUCKS_HUMAN	Q9H1E3	NUCKS_HUMAN	NUCKS1	Nuclear ubiquitous casein and cyclin-dependent kinase substrate 1		sp|Q9H1E3-2|NUCKS_HUMAN	3	8045588	MS/MS	STY:79.9663@EKT(0.7406)PS(0.7406)PKEEDEEPES(0.5187)PPEK;
EKTPSPKEEDEEPESPPEK	EKT[79.9663]PS[79.9663]PKEEDEEPES[79.9663]PPEK	K	K	200	218	19	3	15S(79.9663),3T(79.9663),5S(79.9663)	sp|Q9H1E3|NUCKS_HUMAN	Q9H1E3	NUCKS_HUMAN	NUCKS1	Nuclear ubiquitous casein and cyclin-dependent kinase substrate 1		sp|Q9H1E3-2|NUCKS_HUMAN	8	5.2902024E7	MS/MS	STY:79.9663@EKT(1.0000)PS(1.0000)PKEEDEEPES(1.0000)PPEK;
ELAITDSEHSDAEVSCTDNGTFNLSR	ELAIT[79.9663]DS[79.9663]EHS[79.9663]DAEVSC[57.0215]TDNGTFNLSR	R	G	84	109	26	3	10S(79.9663),16C(57.0215),5T(79.9663),7S(79.9663)	sp|Q86VR2-2|RETR3_HUMAN	Q86VR2-2	RETR3_HUMAN	RETREG3	Isoform 2 of Reticulophagy regulator 3		sp|Q86VR2|RETR3_HUMAN	1	0	MS/MS	STY:79.9663@ELAIT(0.8448)DS(0.8448)EHS(0.8448)DAEVS(0.1236)CT(0.1140)DNGT(0.1140)FNLS(0.1140)R;
ELEENDSENSEFEDDGSEK	ELEENDS[79.9663]ENS[79.9663]EFEDDGS[79.9663]EK	K	V	591	609	19	3	10S(79.9663),17S(79.9663),7S(79.9663)	sp|O43719|HTSF1_HUMAN	O43719	HTSF1_HUMAN	HTATSF1	HIV Tat-specific factor 1			1	1.25967e+06	MS/MS	STY:79.9663@ELEENDS(1.0000)ENS(1.0000)EFEDDGS(1.0000)EK;
ELGTGEQPLSPTTATSPYGGGHALAGQTSPK	ELGTGEQPLSPT[79.9663]TATSPYGGGHALAGQTSPK	R	Q	430	460	31	3	12T(79.9663)	sp|Q96NU1-1|SAM11_HUMAN	Q96NU1-1	SAM11_HUMAN	SAMD11	Isoform 1 of Sterile alpha motif domain-containing protein 11		sp|Q96NU1-2|SAM11_HUMAN, sp|Q96NU1-4|SAM11_HUMAN, sp|Q96NU1-5|SAM11_HUMAN, sp|Q96NU1-6|SAM11_HUMAN, sp|Q96NU1|SAM11_HUMAN	1	1776066	MS/MS	STY:79.9663@ELGT(0.0216)GEQPLS(0.0216)PT(0.2306)T(0.2306)AT(0.2306)S(0.2306)PY(0.0115)GGGHALAGQT(0.0115)S(0.0115)PK;
ELNSNHDGADETSEK	ELNSNHDGADETS[79.9663]EK	K	E	12	26	15	2	13S(79.9663)	sp|Q01105-2|SET_HUMAN	Q01105-2	SET_HUMAN	SET	Isoform 2 of Protein SET			1	1.5306E7	MS/MS	STY:79.9663@ELNS(0.0837)NHDGADET(0.1096)S(0.8068)EK;
ELNSNHDGADETSEK	ELNSNHDGADET[79.9663]SEK	K	E	12	26	15	2	12T(79.9663)	sp|Q01105-2|SET_HUMAN	Q01105-2	SET_HUMAN	SET	Isoform 2 of Protein SET			1	1.2183443E7	MS/MS	STY:79.9663@ELNS(0.0311)NHDGADET(0.4844)S(0.4844)EK;
ELSDQATASPIVAR	ELS[79.9663]DQATASPIVAR	K	T	88	101	14	2	3S(79.9663)	sp|Q5JSH3-2|WDR44_HUMAN	Q5JSH3-2	WDR44_HUMAN	WDR44	Isoform 2 of WD repeat-containing protein 44		sp|Q5JSH3-4|WDR44_HUMAN, sp|Q5JSH3|WDR44_HUMAN	1	0	MS/MS	STY:79.9663@ELS(0.3333)DQAT(0.3333)AS(0.3333)PIVAR;
ELSNSPLR	ELS[79.9663]NSPLR	K	E	1316	1323	8	2	3S(79.9663)	sp|Q9UQ35|SRRM2_HUMAN	Q9UQ35	SRRM2_HUMAN	SRRM2	Serine/arginine repetitive matrix protein 2		sp|Q9UQ35-2|SRRM2_HUMAN	1	1.19236e+06	MS/MS	STY:79.9663@ELS(0.5000)NS(0.5000)PLR;
ELSPAGSISK	ELS[79.9663]PAGSISK	K	N	556	565	10	2	3S(79.9663)	sp|O95453-2|PARN_HUMAN	O95453-2	PARN_HUMAN	PARN	Isoform 2 of Poly(A)-specific ribonuclease PARN		sp|O95453-3|PARN_HUMAN, sp|O95453-4|PARN_HUMAN, sp|O95453|PARN_HUMAN	1	0	MS/MS	STY:79.9663@ELS(0.3333)PAGS(0.3333)IS(0.3333)K;
ELVGDTGSQEGDHEPSGSETEEDTSSSPHR	ELVGDTGS[79.9663]QEGDHEPS[79.9663]GSETEEDTSSSPHR	R	I	43	72	30	3	16S(79.9663),8S(79.9663)	sp|P0DJ93|SIM13_HUMAN	P0DJ93	SIM13_HUMAN	SMIM13	Small integral membrane protein 13			1	3.69346e+06	MS/MS	STY:79.9663@ELVGDT(0.2074)GS(0.2664)QEGDHEPS(0.2180)GS(0.2180)ET(0.2180)EEDT(0.2180)S(0.2180)S(0.2180)S(0.2180)PHR;
ELVGDTGSQEGDHEPSGSETEEDTSSSPHR	ELVGDT[79.9663]GS[79.9663]QEGDHEPSGSETEEDTSSSPHR	R	I	43	72	30	3,4	6T(79.9663),8S(79.9663)	sp|P0DJ93|SIM13_HUMAN	P0DJ93	SIM13_HUMAN	SMIM13	Small integral membrane protein 13			3	4912343	MS/MS	STY:79.9663@ELVGDT(0.7995)GS(0.7995)QEGDHEPS(0.0735)GS(0.0735)ET(0.0735)EEDT(0.0451)S(0.0451)S(0.0451)S(0.0451)PHR;
EMLASDDEEDVSSK	EMLAS[79.9663]DDEEDVSSK	K	V	76	89	14	2	5S(79.9663)	sp|Q0ZGT2-2|NEXN_HUMAN	Q0ZGT2-2	NEXN_HUMAN	NEXN	Isoform 2 of Nexilin		sp|Q0ZGT2-3|NEXN_HUMAN, sp|Q0ZGT2-4|NEXN_HUMAN, sp|Q0ZGT2|NEXN_HUMAN	3	4911354	MS/MS	STY:79.9663@EMLAS(0.3333)DDEEDVS(0.3333)S(0.3333)K;
EMLMEDVGSEEEQEEEDEAPFQEK	EMLMEDVGS[79.9663]EEEQEEEDEAPFQEK	R	D	105	128	24	3	9S(79.9663)	sp|Q9H1E3|NUCKS_HUMAN	Q9H1E3	NUCKS_HUMAN	NUCKS1	Nuclear ubiquitous casein and cyclin-dependent kinase substrate 1		sp|Q9H1E3-2|NUCKS_HUMAN	2	0	MS/MS	STY:79.9663@EMLMEDVGS(1.0000)EEEQEEEDEAPFQEK;
EMSTSNFESSPEVEER	EMSTSNFES[79.9663]S[79.9663]PEVEER	K	P	1262	1277	16	2	10S(79.9663),9S(79.9663)	sp|Q9UQ35|SRRM2_HUMAN	Q9UQ35	SRRM2_HUMAN	SRRM2	Serine/arginine repetitive matrix protein 2		sp|Q9UQ35-2|SRRM2_HUMAN	1	3606359	MS/MS	STY:79.9663@EMS(0.0764)T(0.0764)S(0.0764)NFES(0.8854)S(0.8854)PEVEER;
EMLASDDEEDVSSK	EM[15.9949]LASDDEEDVS[79.9663]SK	K	V	76	89	14	2	12S(79.9663),2M(15.9949)	sp|Q0ZGT2-2|NEXN_HUMAN	Q0ZGT2-2	NEXN_HUMAN	NEXN	Isoform 2 of Nexilin		sp|Q0ZGT2-3|NEXN_HUMAN, sp|Q0ZGT2-4|NEXN_HUMAN, sp|Q0ZGT2|NEXN_HUMAN	2	2.49454e+06	MS/MS	STY:79.9663@EMLAS(0.0811)DDEEDVS(0.4595)S(0.4595)K;M:15.9949@EM(1.0000)LASDDEEDVSSK;
EMLASDDEEDVSSK	EM[15.9949]LAS[79.9663]DDEEDVSSK	K	V	76	89	14	2	2M(15.9949),5S(79.9663)	sp|Q0ZGT2-2|NEXN_HUMAN	Q0ZGT2-2	NEXN_HUMAN	NEXN	Isoform 2 of Nexilin		sp|Q0ZGT2-3|NEXN_HUMAN, sp|Q0ZGT2-4|NEXN_HUMAN, sp|Q0ZGT2|NEXN_HUMAN	1	2.49454e+06	MS/MS	STY:79.9663@EMLAS(0.3333)DDEEDVS(0.3333)S(0.3333)K;M:15.9949@EM(1.0000)LASDDEEDVSSK;
EMLMEDVGSEEEQEEEDEAPFQEK	EM[15.9949]LMEDVGS[79.9663]EEEQEEEDEAPFQEK	R	D	105	128	24	3	2M(15.9949),9S(79.9663)	sp|Q9H1E3|NUCKS_HUMAN	Q9H1E3	NUCKS_HUMAN	NUCKS1	Nuclear ubiquitous casein and cyclin-dependent kinase substrate 1		sp|Q9H1E3-2|NUCKS_HUMAN	4	7084762	MS/MS	STY:79.9663@EMLMEDVGS(1.0000)EEEQEEEDEAPFQEK;M:15.9949@EM(0.5000)LM(0.5000)EDVGSEEEQEEEDEAPFQEK;
EMLMEDVGSEEEQEEEDEAPFQEK	EM[15.9949]LM[15.9949]EDVGS[79.9663]EEEQEEEDEAPFQEK	R	D	105	128	24	3	2M(15.9949),4M(15.9949),9S(79.9663)	sp|Q9H1E3|NUCKS_HUMAN	Q9H1E3	NUCKS_HUMAN	NUCKS1	Nuclear ubiquitous casein and cyclin-dependent kinase substrate 1		sp|Q9H1E3-2|NUCKS_HUMAN	3	5.69513e+06	MS/MS	STY:79.9663@EMLMEDVGS(1.0000)EEEQEEEDEAPFQEK;M:15.9949@EM(1.0000)LM(1.0000)EDVGSEEEQEEEDEAPFQEK;
ENDLYVLPPLQEEEKHSSEEEDEK	ENDLYVLPPLQEEEKHS[79.9663]S[79.9663]EEEDEK	R	E	140	163	24	3	17S(79.9663),18S(79.9663)	sp|P28715|ERCC5_HUMAN	P28715	ERCC5_HUMAN	ERCC5	DNA excision repair protein ERCC-5		sp|P28715-3|ERCC5_HUMAN	1	1.2288036E7	MS/MS	STY:79.9663@ENDLY(0.1751)VLPPLQEEEKHS(0.9125)S(0.9125)EEEDEK;
ENDSSEEVDVFQGSSPVDDIPQEETEEEEVSTVNVR	ENDS[79.9663]SEEVDVFQGSSPVDDIPQEETEEEEVSTVNVR	K	R	1403	1438	36	3	4S(79.9663)	sp|Q9NTI5|PDS5B_HUMAN	Q9NTI5	PDS5B_HUMAN	PDS5B	Sister chromatid cohesion protein PDS5 homolog B			1	0	MS/MS	STY:79.9663@ENDS(0.2453)S(0.2453)EEVDVFQGS(0.2453)S(0.2453)PVDDIPQEET(0.0079)EEEEVS(0.0055)T(0.0055)VNVR;
ENEEGDTGNWYSSDEDEGGSSVTSILK	ENEEGDT[79.9663]GNWY[79.9663]SSDEDEGGSSVTSILK	R	T	796	822	27	3	11Y(79.9663),7T(79.9663)	sp|Q9UPT8|ZC3H4_HUMAN	Q9UPT8	ZC3H4_HUMAN	ZC3H4	Zinc finger CCCH domain-containing protein 4			1	0	MS/MS	STY:79.9663@ENEEGDT(0.4382)GNWY(0.4382)S(0.0786)S(0.0786)DEDEGGS(0.4382)S(0.4382)VT(0.0449)S(0.0449)ILK;
ENESSDSEEEVSRPR	ENES[79.9663]S[79.9663]DS[79.9663]EEEVSRPR	K	K	2487	2501	15	2	4S(79.9663),5S(79.9663),7S(79.9663)	sp|Q6KC79-2|NIPBL_HUMAN	Q6KC79-2	NIPBL_HUMAN	NIPBL	Isoform 2 of Nipped-B-like protein		sp|Q6KC79|NIPBL_HUMAN	1	5526391	MS/MS	STY:79.9663@ENES(0.9024)S(0.9023)DS(0.9023)EEEVS(0.2929)RPR;
ENPPVEDSSDEDDK	ENPPVEDS[79.9663]SDEDDK	R	R	491	504	14	2	8S(79.9663)	sp|Q8TCJ2|STT3B_HUMAN	Q8TCJ2	STT3B_HUMAN	STT3B	Dolichyl-diphosphooligosaccharide--protein glycosyltransferase subunit STT3B			4	6.34626e+06	MS/MS	STY:79.9663@ENPPVEDS(0.5000)S(0.5000)DEDDK;
ENPPVEDSSDEDDK	ENPPVEDS[79.9663]S[79.9663]DEDDK	R	R	491	504	14	2	8S(79.9663),9S(79.9663)	sp|Q8TCJ2|STT3B_HUMAN	Q8TCJ2	STT3B_HUMAN	STT3B	Dolichyl-diphosphooligosaccharide--protein glycosyltransferase subunit STT3B			3	9647599	MS/MS	STY:79.9663@ENPPVEDS(1.0000)S(1.0000)DEDDK;
ENSGPVENGVSDQEGEEQAR	ENS[79.9663]GPVENGVSDQEGEEQAR	K	E	768	787	20	3	3S(79.9663)	sp|Q8TEQ6|GEMI5_HUMAN	Q8TEQ6	GEMI5_HUMAN	GEMIN5	Gem-associated protein 5			2	0	MS/MS	STY:79.9663@ENS(0.5000)GPVENGVS(0.5000)DQEGEEQAR;
ENSSPSVTSANLDHTK	ENS[79.9663]SPSVTSANLDHTK	K	P	6	21	16	2	3S(79.9663)	sp|O75909-1|CCNK_HUMAN	O75909-1	CCNK_HUMAN	CCNK	Isoform 3 of Cyclin-K		sp|O75909-2|CCNK_HUMAN, sp|O75909-4|CCNK_HUMAN, sp|O75909|CCNK_HUMAN	1	646827	MS/MS	STY:79.9663@ENS(0.1971)S(0.1971)PS(0.1971)VT(0.1971)S(0.1971)ANLDHT(0.0144)K;
ENVEYIEREESDGEYDEFGR	ENVEYIEREES[79.9663]DGEYDEFGR	R	K	110	129	20	3	11S(79.9663)	sp|O95218-2|ZRAB2_HUMAN	O95218-2	ZRAB2_HUMAN	ZRANB2	Isoform 2 of Zinc finger Ran-binding domain-containing protein 2		sp|O95218|ZRAB2_HUMAN	1	7372000	MS/MS	STY:79.9663@ENVEY(0.2996)IEREES(0.3502)DGEY(0.3502)DEFGR;
ENVEYIEREESDGEYDEFGR	ENVEY[79.9663]IEREESDGEYDEFGR	R	K	110	129	20	3	5Y(79.9663)	sp|O95218-2|ZRAB2_HUMAN	O95218-2	ZRAB2_HUMAN	ZRANB2	Isoform 2 of Zinc finger Ran-binding domain-containing protein 2		sp|O95218|ZRAB2_HUMAN	4	7372000	MS/MS	STY:79.9663@ENVEY(0.3333)IEREES(0.3333)DGEY(0.3333)DEFGR;
ENYSDSEEEDDDDVASSR	ENY[79.9663]S[79.9663]DSEEEDDDDVASSR	R	Q	256	273	18	2	3Y(79.9663),4S(79.9663)	sp|Q9Y2U8|MAN1_HUMAN	Q9Y2U8	MAN1_HUMAN	LEMD3	Inner nuclear membrane protein Man1			2	1776546	MS/MS	STY:79.9663@ENY(0.6330)S(0.6330)DS(0.6330)EEEDDDDVAS(0.0505)S(0.0505)R;
EPAITSQNSPEAR	EPAITSQNS[79.9663]PEAR	K	E	71	83	13	2	9S(79.9663)	sp|P23193-2|TCEA1_HUMAN	P23193-2	TCEA1_HUMAN	TCEA1	Isoform 2 of Transcription elongation factor A protein 1		sp|P23193|TCEA1_HUMAN	2	1.680858E7	MS/MS	STY:79.9663@EPAIT(0.0326)S(0.0326)QNS(0.9348)PEAR;
EPAITSQNSPEAR	EPAITS[79.9663]QNSPEAR	K	E	71	83	13	2	6S(79.9663)	sp|P23193-2|TCEA1_HUMAN	P23193-2	TCEA1_HUMAN	TCEA1	Isoform 2 of Transcription elongation factor A protein 1		sp|P23193|TCEA1_HUMAN	1	1.680858E7	MS/MS	STY:79.9663@EPAIT(0.0189)S(0.4905)QNS(0.4905)PEAR;
EPAITSQNSPEAR	EPAIT[79.9663]SQNSPEAR	K	E	71	83	13	2	5T(79.9663)	sp|P23193-2|TCEA1_HUMAN	P23193-2	TCEA1_HUMAN	TCEA1	Isoform 2 of Transcription elongation factor A protein 1		sp|P23193|TCEA1_HUMAN	1	1.680858E7	MS/MS	STY:79.9663@EPAIT(0.3333)S(0.3333)QNS(0.3333)PEAR;
EPALPLEPDSGGNTSPGVTANGEAR	EPALPLEPDS[79.9663]GGNTSPGVTANGEAR	R	T	681	705	25	3	10S(79.9663)	sp|Q92974-2|ARHG2_HUMAN	Q92974-2	ARHG2_HUMAN	ARHGEF2	Isoform 2 of Rho guanine nucleotide exchange factor 2		sp|Q92974-3|ARHG2_HUMAN, sp|Q92974|ARHG2_HUMAN	3	4.96722e+06	MS/MS	STY:79.9663@EPALPLEPDS(0.8404)GGNT(0.0587)S(0.0587)PGVT(0.0422)ANGEAR;
EPEMPGPREESEEEEDEDDEEEEEEEK	EPEMPGPREES[79.9663]EEEEDEDDEEEEEEEK	K	G	22	48	27	3	11S(79.9663)	sp|P35659-2|DEK_HUMAN	P35659-2	DEK_HUMAN	DEK	Isoform 2 of Protein DEK		sp|P35659|DEK_HUMAN	8	2.247295E7	MS/MS	STY:79.9663@EPEMPGPREES(1.0000)EEEEDEDDEEEEEEEK;
EPEMPGPREESEEEEDEDDEEEEEEEK	EPEM[15.9949]PGPREES[79.9663]EEEEDEDDEEEEEEEK	K	G	22	48	27	3	11S(79.9663),4M(15.9949)	sp|P35659-2|DEK_HUMAN	P35659-2	DEK_HUMAN	DEK	Isoform 2 of Protein DEK		sp|P35659|DEK_HUMAN	3	1.2565418E7	MS/MS	STY:79.9663@EPEMPGPREES(1.0000)EEEEDEDDEEEEEEEK;M:15.9949@EPEM(1.0000)PGPREESEEEEDEDDEEEEEEEK;
EPSEVPTPK	EPS[79.9663]EVPTPK	K	R	36	44	9	2	3S(79.9663)	sp|P17096-2|HMGA1_HUMAN	P17096-2	HMGA1_HUMAN	HMGA1	Isoform HMG-Y of High mobility group protein HMG-I/HMG-Y		sp|P17096-3|HMGA1_HUMAN, sp|P17096|HMGA1_HUMAN	2	0	MS/MS	STY:79.9663@EPS(0.5000)EVPT(0.5000)PK;
EPVADEEEEDSDDDVEPITEFR	EPVADEEEEDSDDDVEPIT[79.9663]EFR	K	F	92	113	22	3	19T(79.9663)	sp|P54105|ICLN_HUMAN	P54105	ICLN_HUMAN	CLNS1A	Methylosome subunit pICln			1	2.65661e+06	MS/MS	STY:79.9663@EPVADEEEEDS(0.3462)DDDVEPIT(0.6538)EFR;
EPVADEEEEDSDDDVEPITEFR	EPVADEEEEDS[79.9663]DDDVEPITEFR	K	F	92	113	22	3	11S(79.9663)	sp|P54105|ICLN_HUMAN	P54105	ICLN_HUMAN	CLNS1A	Methylosome subunit pICln			5	1.289101E7	MS/MS	STY:79.9663@EPVADEEEEDS(0.9409)DDDVEPIT(0.0591)EFR;
EQGTESRSSTPLPTISSSAENTR	EQGTESRSSTPLPT[79.9663]IS[79.9663]S[79.9663]SAENTR	R	Q	151	173	23	3	14T(79.9663),16S(79.9663),17S(79.9663)	sp|P42166|LAP2A_HUMAN	P42166	LAP2A_HUMAN	TMPO	Lamina-associated polypeptide 2, isoform alpha		sp|P42167-2|LAP2B_HUMAN, sp|P42167-3|LAP2B_HUMAN, sp|P42167|LAP2B_HUMAN	1	3973611	MS/MS	STY:79.9663@EQGT(0.1539)ES(0.2465)RS(0.2465)S(0.2465)T(0.2465)PLPT(0.4081)IS(0.3630)S(0.3630)S(0.3630)AENT(0.3630)R;
EQGTESRSSTPLPTISSSAENTR	EQGTESRS[79.9663]S[79.9663]T[79.9663]PLPTISSSAENTR	R	Q	151	173	23	3	10T(79.9663),8S(79.9663),9S(79.9663)	sp|P42166|LAP2A_HUMAN	P42166	LAP2A_HUMAN	TMPO	Lamina-associated polypeptide 2, isoform alpha		sp|P42167-2|LAP2B_HUMAN, sp|P42167-3|LAP2B_HUMAN, sp|P42167|LAP2B_HUMAN	1	4.00367e+06	MS/MS	STY:79.9663@EQGT(0.2872)ES(0.2872)RS(0.7258)S(0.7258)T(0.7258)PLPT(0.0496)IS(0.0496)S(0.0496)S(0.0496)AENT(0.0496)R;
EQGTESRSSTPLPTISSSAENTR	EQGT[79.9663]ES[79.9663]RS[79.9663]STPLPTISSSAENTR	R	Q	151	173	23	3	4T(79.9663),6S(79.9663),8S(79.9663)	sp|P42166|LAP2A_HUMAN	P42166	LAP2A_HUMAN	TMPO	Lamina-associated polypeptide 2, isoform alpha		sp|P42167-2|LAP2B_HUMAN, sp|P42167-3|LAP2B_HUMAN, sp|P42167|LAP2B_HUMAN	1	3973611	MS/MS	STY:79.9663@EQGT(0.3000)ES(0.3000)RS(0.3000)S(0.3000)T(0.3000)PLPT(0.3000)IS(0.3000)S(0.3000)S(0.3000)AENT(0.3000)R;
EQISDIDDAVR	EQIS[79.9663]DIDDAVR	K	K	115	125	11	2	4S(79.9663)	sp|P53999|TCP4_HUMAN	P53999	TCP4_HUMAN	SUB1	Activated RNA polymerase II transcriptional coactivator p15			1	0	MS/MS	STY:79.9663@EQIS(1.0000)DIDDAVR;
EQLSETEGSGEDEPGNDPSETTQK	EQLSETEGSGEDEPGNDPS[79.9663]ET[79.9663]TQK	K	K	625	648	24	3	19S(79.9663),21T(79.9663)	sp|Q13107-2|UBP4_HUMAN	Q13107-2	UBP4_HUMAN	USP4	Isoform 2 of Ubiquitin carboxyl-terminal hydrolase 4		sp|Q13107|UBP4_HUMAN	1	0	MS/MS	STY:79.9663@EQLS(0.1717)ET(0.1717)EGS(0.1717)GEDEPGNDPS(0.4950)ET(0.4950)T(0.4950)QK;
EQLSETEGSGEDEPGNDPSETTQK	EQLS[79.9663]ETEGSGEDEPGNDPSETTQK	K	K	625	648	24	3	4S(79.9663)	sp|Q13107-2|UBP4_HUMAN	Q13107-2	UBP4_HUMAN	USP4	Isoform 2 of Ubiquitin carboxyl-terminal hydrolase 4		sp|Q13107|UBP4_HUMAN	1	907975	MS/MS	STY:79.9663@EQLS(0.1667)ET(0.1667)EGS(0.1667)GEDEPGNDPS(0.1667)ET(0.1667)T(0.1667)QK;
EQLSETEGSGEDEPGNDPSETTQK	EQLS[79.9663]ET[79.9663]EGSGEDEPGNDPSETTQK	K	K	625	648	24	3	4S(79.9663),6T(79.9663)	sp|Q13107-2|UBP4_HUMAN	Q13107-2	UBP4_HUMAN	USP4	Isoform 2 of Ubiquitin carboxyl-terminal hydrolase 4		sp|Q13107|UBP4_HUMAN	1	0	MS/MS	STY:79.9663@EQLS(0.3333)ET(0.3333)EGS(0.3333)GEDEPGNDPS(0.3333)ET(0.3333)T(0.3333)QK;
EQSEVSVSPR	EQSEVS[79.9663]VS[79.9663]PR	K	A	25	34	10	2	6S(79.9663),8S(79.9663)	sp|Q7L4I2|RSRC2_HUMAN	Q7L4I2	RSRC2_HUMAN	RSRC2	Arginine/serine-rich coiled-coil protein 2			1	1.5458e+06	MS/MS	STY:79.9663@EQS(0.2529)EVS(0.8736)VS(0.8736)PR;
EQSEVSVSPR	EQS[79.9663]EVSVSPR	K	A	25	34	10	2	3S(79.9663)	sp|Q7L4I2|RSRC2_HUMAN	Q7L4I2	RSRC2_HUMAN	RSRC2	Arginine/serine-rich coiled-coil protein 2			1	5.34931e+06	MS/MS	STY:79.9663@EQS(0.9306)EVS(0.0347)VS(0.0347)PR;
EQSEVSVSPR	EQS[79.9663]EVS[79.9663]VSPR	K	A	25	34	10	2	3S(79.9663),6S(79.9663)	sp|Q7L4I2|RSRC2_HUMAN	Q7L4I2	RSRC2_HUMAN	RSRC2	Arginine/serine-rich coiled-coil protein 2			1	1.7489e+06	MS/MS	STY:79.9663@EQS(0.6667)EVS(0.6667)VS(0.6667)PR;
EQYVPPRSPK	EQYVPPRS[79.9663]PK	K	-	596	605	10	2	8S(79.9663)	sp|Q71RC2-2|LARP4_HUMAN	Q71RC2-2	LARP4_HUMAN	LARP4	Isoform 2 of La-related protein 4		sp|Q71RC2-3|LARP4_HUMAN, sp|Q71RC2-4|LARP4_HUMAN, sp|Q71RC2-5|LARP4_HUMAN, sp|Q71RC2-6|LARP4_HUMAN, sp|Q71RC2|LARP4_HUMAN	1	2.41893e+06	MS/MS	STY:79.9663@EQY(0.2481)VPPRS(0.7519)PK;
EQYVPPRSPK	EQY[79.9663]VPPRSPK	K	-	596	605	10	2	3Y(79.9663)	sp|Q71RC2-2|LARP4_HUMAN	Q71RC2-2	LARP4_HUMAN	LARP4	Isoform 2 of La-related protein 4		sp|Q71RC2-3|LARP4_HUMAN, sp|Q71RC2-4|LARP4_HUMAN, sp|Q71RC2-5|LARP4_HUMAN, sp|Q71RC2-6|LARP4_HUMAN, sp|Q71RC2|LARP4_HUMAN	1	2.41893e+06	MS/MS	STY:79.9663@EQY(0.5000)VPPRS(0.5000)PK;
ERDAEQSGSPR	ERDAEQS[79.9663]GSPR	R	T	177	187	11	2	7S(79.9663)	sp|P08651-2|NFIC_HUMAN	P08651-2	NFIC_HUMAN	NFIC	Isoform 1 of Nuclear factor 1 C-type		sp|P08651-3|NFIC_HUMAN, sp|P08651-5|NFIC_HUMAN, sp|P08651-6|NFIC_HUMAN, sp|P08651|NFIC_HUMAN	1	2396907	MS/MS	STY:79.9663@ERDAEQS(0.5000)GS(0.5000)PR;
EREESEDELEEANGNNPIDIEVDQNK	EREES[79.9663]EDELEEANGNNPIDIEVDQNK	R	E	256	281	26	3	5S(79.9663)	sp|Q9UKL0|RCOR1_HUMAN	Q9UKL0	RCOR1_HUMAN	RCOR1	REST corepressor 1			2	1.75895e+06	MS/MS	STY:79.9663@EREES(1.0000)EDELEEANGNNPIDIEVDQNK;
ERSPSPLRGNVVPSPLPTR	ERSPSPLRGNVVPS[79.9663]PLPT[79.9663]R	R	R	28	46	19	3	14S(79.9663),18T(79.9663)	sp|Q9Y2V2|CHSP1_HUMAN	Q9Y2V2	CHSP1_HUMAN	CARHSP1	Calcium-regulated heat-stable protein 1			1	2.9532e+06	MS/MS	STY:79.9663@ERS(0.4210)PS(0.4210)PLRGNVVPS(0.5790)PLPT(0.5790)R;
ERSPALK	ERS[79.9663]PALK	R	S	246	252	7	2	3S(79.9663)	sp|Q9Y2W1|TR150_HUMAN	Q9Y2W1	TR150_HUMAN	THRAP3	Thyroid hormone receptor-associated protein 3			1	8629811	MS/MS	STY:79.9663@ERS(1.0000)PALK;
ESDQTLAALLSPK	ESDQT[79.9663]LAALLSPK	K	E	1687	1699	13	2	5T(79.9663)	sp|P18583-10|SON_HUMAN	P18583-10	SON_HUMAN	SON	Isoform J of Protein SON		sp|P18583-2|SON_HUMAN, sp|P18583-3|SON_HUMAN, sp|P18583-4|SON_HUMAN, sp|P18583-5|SON_HUMAN, sp|P18583-6|SON_HUMAN, sp|P18583-7|SON_HUMAN, sp|P18583-9|SON_HUMAN, sp|P18583|SON_HUMAN	1	0	MS/MS	STY:79.9663@ES(0.0753)DQT(0.4624)LAALLS(0.4624)PK;
ESEDKPEIEDVGSDEEEEK	ESEDKPEIEDVGS[79.9663]DEEEEK	K	K	373	391	19	2,3	13S(79.9663)	sp|P07900-2|HS90A_HUMAN	P07900-2	HS90A_HUMAN	HSP90AA1	Isoform 2 of Heat shock protein HSP 90-alpha		sp|P07900|HS90A_HUMAN	15	3.27930368E8	MS/MS	STY:79.9663@ES(0.0605)EDKPEIEDVGS(0.9395)DEEEEK;
ESEDKPEIEDVGSDEEEEKK	ESEDKPEIEDVGS[79.9663]DEEEEKK	K	D	373	392	20	3,4	13S(79.9663)	sp|P07900-2|HS90A_HUMAN	P07900-2	HS90A_HUMAN	HSP90AA1	Isoform 2 of Heat shock protein HSP 90-alpha		sp|P07900|HS90A_HUMAN	22	8.716887E8	MS/MS	STY:79.9663@ES(0.0547)EDKPEIEDVGS(0.9453)DEEEEKK;
ESEQESEEEILAQK	ESEQES[79.9663]EEEILAQK	K	K	222	235	14	2	6S(79.9663)	sp|Q9BW71|HIRP3_HUMAN	Q9BW71	HIRP3_HUMAN	HIRIP3	HIRA-interacting protein 3			3	2.7319e+06	MS/MS	STY:79.9663@ES(0.1884)EQES(0.8116)EEEILAQK;
ESLKEEDESDDDNM	ESLKEEDES[79.9663]DDDNM	K	-	235	248	14	2	9S(79.9663)	sp|P25788-2|PSA3_HUMAN	P25788-2	PSA3_HUMAN	PSMA3	Isoform 2 of Proteasome subunit alpha type-3		sp|P25788|PSA3_HUMAN	3	3.4486652E7	MS/MS	STY:79.9663@ES(0.0776)LKEEDES(0.9224)DDDNM;
ESLKEEDESDDDNM	ESLKEEDES[79.9663]DDDNM[15.9949]	K	-	235	248	14	2	14M(15.9949),9S(79.9663)	sp|P25788-2|PSA3_HUMAN	P25788-2	PSA3_HUMAN	PSMA3	Isoform 2 of Proteasome subunit alpha type-3		sp|P25788|PSA3_HUMAN	2	2.1455834E7	MS/MS	STY:79.9663@ES(0.0830)LKEEDES(0.9170)DDDNM;M:15.9949@ESLKEEDESDDDNM(1.0000);
ESSANNSVSPSESLR	ESSANNSVS[79.9663]PSESLR	R	A	195	209	15	2	9S(79.9663)	sp|Q04726-2|TLE3_HUMAN	Q04726-2	TLE3_HUMAN	TLE3	Isoform 2 of Transducin-like enhancer protein 3		sp|Q04726-3|TLE3_HUMAN, sp|Q04726-4|TLE3_HUMAN, sp|Q04726-5|TLE3_HUMAN, sp|Q04726-6|TLE3_HUMAN, sp|Q04726-7|TLE3_HUMAN, sp|Q04726|TLE3_HUMAN	1	3226173	MS/MS	STY:79.9663@ES(0.0138)S(0.0138)ANNS(0.0219)VS(0.4686)PS(0.4686)ES(0.0133)LR;
ESTQLSPADLTEGKPTDPSK	EST[79.9663]QLSPADLTEGKPTDPSK	R	L	416	435	20	3	3T(79.9663)	sp|Q08J23-2|NSUN2_HUMAN	Q08J23-2	NSUN2_HUMAN	NSUN2	Isoform 2 of RNA cytosine C(5)-methyltransferase NSUN2		sp|Q08J23-3|NSUN2_HUMAN, sp|Q08J23|NSUN2_HUMAN	1	1.0479008E7	MS/MS	STY:79.9663@ES(0.0383)T(0.3084)QLS(0.3084)PADLT(0.3084)EGKPT(0.0117)DPS(0.0249)K;
ESVPEFPLSPPK	ESVPEFPLS[79.9663]PPK	K	K	30	41	12	2	9S(79.9663)	sp|P16949|STMN1_HUMAN	P16949	STMN1_HUMAN	STMN1	Stathmin		sp|P16949-2|STMN1_HUMAN	5	1.3481388E7	MS/MS	STY:79.9663@ES(0.0564)VPEFPLS(0.9436)PPK;
ESAAPASPAPSPAPSPTPAPPQK	ES[79.9663]AAPASPAPS[79.9663]PAPS[79.9663]PTPAPPQK	K	E	501	523	23	3	11S(79.9663),15S(79.9663),2S(79.9663)	sp|Q3KQU3-2|MA7D1_HUMAN	Q3KQU3-2	MA7D1_HUMAN	MAP7D1	Isoform 2 of MAP7 domain-containing protein 1		sp|Q3KQU3-3|MA7D1_HUMAN, sp|Q3KQU3-4|MA7D1_HUMAN, sp|Q3KQU3|MA7D1_HUMAN	1	3.13566e+06	MS/MS	STY:79.9663@ES(0.7384)AAPAS(0.1222)PAPS(0.7378)PAPS(0.7008)PT(0.7008)PAPPQK;
ESAAPASPAPSPAPSPTPAPPQK	ES[79.9663]AAPAS[79.9663]PAPS[79.9663]PAPSPTPAPPQK	K	E	501	523	23	3	11S(79.9663),2S(79.9663),7S(79.9663)	sp|Q3KQU3-2|MA7D1_HUMAN	Q3KQU3-2	MA7D1_HUMAN	MAP7D1	Isoform 2 of MAP7 domain-containing protein 1		sp|Q3KQU3-3|MA7D1_HUMAN, sp|Q3KQU3-4|MA7D1_HUMAN, sp|Q3KQU3|MA7D1_HUMAN	1	3.13566e+06	MS/MS	STY:79.9663@ES(0.6724)AAPAS(0.6724)PAPS(0.6724)PAPS(0.6724)PT(0.3104)PAPPQK;
ESDQTLAALLSPK	ES[79.9663]DQTLAALLSPK	K	E	1687	1699	13	2	2S(79.9663)	sp|P18583-10|SON_HUMAN	P18583-10	SON_HUMAN	SON	Isoform J of Protein SON		sp|P18583-2|SON_HUMAN, sp|P18583-3|SON_HUMAN, sp|P18583-4|SON_HUMAN, sp|P18583-5|SON_HUMAN, sp|P18583-6|SON_HUMAN, sp|P18583-7|SON_HUMAN, sp|P18583-9|SON_HUMAN, sp|P18583|SON_HUMAN	1	0	MS/MS	STY:79.9663@ES(0.8258)DQT(0.1064)LAALLS(0.0677)PK;
ESEDKPEIEDVGSDEEEEK	ES[79.9663]EDKPEIEDVGSDEEEEK	K	K	373	391	19	2,3	2S(79.9663)	sp|P07900-2|HS90A_HUMAN	P07900-2	HS90A_HUMAN	HSP90AA1	Isoform 2 of Heat shock protein HSP 90-alpha		sp|P07900|HS90A_HUMAN	5	2.84392544E8	MS/MS	STY:79.9663@ES(0.9372)EDKPEIEDVGS(0.0628)DEEEEK;
ESEDKPEIEDVGSDEEEEKK	ES[79.9663]EDKPEIEDVGSDEEEEKK	K	D	373	392	20	3,4	2S(79.9663)	sp|P07900-2|HS90A_HUMAN	P07900-2	HS90A_HUMAN	HSP90AA1	Isoform 2 of Heat shock protein HSP 90-alpha		sp|P07900|HS90A_HUMAN	4	5.511248E8	MS/MS	STY:79.9663@ES(0.7328)EDKPEIEDVGS(0.2672)DEEEEKK;
ESEGEEEDEDEDLSK	ES[79.9663]EGEEEDEDEDLSK	K	Y	152	166	15	2	2S(79.9663)	sp|O95218-2|ZRAB2_HUMAN	O95218-2	ZRAB2_HUMAN	ZRANB2	Isoform 2 of Zinc finger Ran-binding domain-containing protein 2		sp|O95218|ZRAB2_HUMAN	1	824400	MS/MS	STY:79.9663@ES(0.8773)EGEEEDEDEDLS(0.1227)K;
ESEQESEEEILAQK	ES[79.9663]EQESEEEILAQK	K	K	222	235	14	2	2S(79.9663)	sp|Q9BW71|HIRP3_HUMAN	Q9BW71	HIRP3_HUMAN	HIRIP3	HIRA-interacting protein 3			3	2.7319e+06	MS/MS	STY:79.9663@ES(0.5000)EQES(0.5000)EEEILAQK;
ESKEEETSIDVAGKPNEVTK	ES[79.9663]KEEETSIDVAGKPNEVTK	K	A	460	479	20	3	2S(79.9663)	sp|P53985|MOT1_HUMAN	P53985	MOT1_HUMAN	SLC16A1	Monocarboxylate transporter 1			1	0	MS/MS	STY:79.9663@ES(0.3285)KEEET(0.3285)S(0.3285)IDVAGKPNEVT(0.0144)K;
ESLKEEDESDDDNM	ES[79.9663]LKEEDESDDDNM	K	-	235	248	14	2	2S(79.9663)	sp|P25788-2|PSA3_HUMAN	P25788-2	PSA3_HUMAN	PSMA3	Isoform 2 of Proteasome subunit alpha type-3		sp|P25788|PSA3_HUMAN	4	3.9297772E7	MS/MS	STY:79.9663@ES(0.5000)LKEEDES(0.5000)DDDNM;
ESLKEEDESDDDNM	ES[79.9663]LKEEDESDDDNM[15.9949]	K	-	235	248	14	2	14M(15.9949),2S(79.9663)	sp|P25788-2|PSA3_HUMAN	P25788-2	PSA3_HUMAN	PSMA3	Isoform 2 of Proteasome subunit alpha type-3		sp|P25788|PSA3_HUMAN	5	2.1455834E7	MS/MS	STY:79.9663@ES(0.8491)LKEEDES(0.1509)DDDNM;M:15.9949@ESLKEEDESDDDNM(1.0000);
ESPRPLQLPGAEGPAISDGEEGGGEPGAGGGAAGAAGAGR	ES[79.9663]PRPLQLPGAEGPAISDGEEGGGEPGAGGGAAGAAGAGR	R	R	74	113	40	4	2S(79.9663)	sp|Q6PKG0|LARP1_HUMAN	Q6PKG0	LARP1_HUMAN	LARP1	La-related protein 1			1	1.25855e+06	MS/MS	STY:79.9663@ES(0.5000)PRPLQLPGAEGPAIS(0.5000)DGEEGGGEPGAGGGAAGAAGAGR;
ESRQESDPEDDDVK	ES[79.9663]RQESDPEDDDVK	R	K	95	108	14	2	2S(79.9663)	sp|Q9H307|PININ_HUMAN	Q9H307	PININ_HUMAN	PNN	Pinin			2	7.90392e+06	MS/MS	STY:79.9663@ES(0.5000)RQES(0.5000)DPEDDDVK;
ESSANNSVSPSESLR	ES[79.9663]SANNSVSPSESLR	R	A	195	209	15	2	2S(79.9663)	sp|Q04726-2|TLE3_HUMAN	Q04726-2	TLE3_HUMAN	TLE3	Isoform 2 of Transducin-like enhancer protein 3		sp|Q04726-3|TLE3_HUMAN, sp|Q04726-4|TLE3_HUMAN, sp|Q04726-5|TLE3_HUMAN, sp|Q04726-6|TLE3_HUMAN, sp|Q04726-7|TLE3_HUMAN, sp|Q04726|TLE3_HUMAN	2	3226173	MS/MS	STY:79.9663@ES(0.2662)S(0.2662)ANNS(0.2662)VS(0.0671)PS(0.0671)ES(0.0671)LR;
ESSPLYSPTFSDSTSAVK	ES[79.9663]SPLYSPTFSDSTSAVK	R	E	1791	1808	18	2	2S(79.9663)	sp|P46821|MAP1B_HUMAN	P46821	MAP1B_HUMAN	MAP1B	Microtubule-associated protein 1B			1	0	MS/MS	STY:79.9663@ES(0.3250)S(0.3250)PLY(0.0630)S(0.0630)PT(0.0448)FS(0.0448)DS(0.0448)T(0.0448)S(0.0448)AVK;
ESSPIPSPTSDR	ES[79.9663]S[79.9663]PIPSPTSDR	K	K	2163	2174	12	2	2S(79.9663),3S(79.9663)	sp|Q01082|SPTB2_HUMAN	Q01082	SPTB2_HUMAN	SPTBN1	Spectrin beta chain, non-erythrocytic 1			3	8.38771e+06	MS/MS	STY:79.9663@ES(0.6301)S(0.6301)PIPS(0.6301)PT(0.0548)S(0.0548)DR;
ESTQLSPADLTEGKPTDPSK	ES[79.9663]TQLSPADLTEGKPTDPSK	R	L	416	435	20	3	2S(79.9663)	sp|Q08J23-2|NSUN2_HUMAN	Q08J23-2	NSUN2_HUMAN	NSUN2	Isoform 2 of RNA cytosine C(5)-methyltransferase NSUN2		sp|Q08J23-3|NSUN2_HUMAN, sp|Q08J23|NSUN2_HUMAN	2	1.0479008E7	MS/MS	STY:79.9663@ES(0.3252)T(0.3252)QLS(0.3252)PADLT(0.0119)EGKPT(0.0066)DPS(0.0059)K;
ESVPEFPLSPPK	ES[79.9663]VPEFPLSPPK	K	K	30	41	12	2	2S(79.9663)	sp|P16949|STMN1_HUMAN	P16949	STMN1_HUMAN	STMN1	Stathmin		sp|P16949-2|STMN1_HUMAN	2	1.3481388E7	MS/MS	STY:79.9663@ES(0.5000)VPEFPLS(0.5000)PPK;
ETEEQDSDSAEQGDPAGEGK	ETEEQDS[79.9663]DSAEQGDPAGEGK	R	E	54	73	20	2	7S(79.9663)	sp|O95361|TRI16_HUMAN	O95361	TRI16_HUMAN	TRIM16	Tripartite motif-containing protein 16			1	0	MS/MS	STY:79.9663@ET(0.0538)EEQDS(0.4731)DS(0.4731)AEQGDPAGEGK;
ETERASPIK	ETERAS[79.9663]PIK	K	M	353	361	9	2	6S(79.9663)	sp|P27816-2|MAP4_HUMAN	P27816-2	MAP4_HUMAN	MAP4	Isoform 2 of Microtubule-associated protein 4		sp|P27816-6|MAP4_HUMAN, sp|P27816|MAP4_HUMAN	1	1.2364689E7	MS/MS	STY:79.9663@ET(0.3361)ERAS(0.6639)PIK;
ETESAPGSPR	ETESAPGS[79.9663]PR	K	A	514	523	10	2	8S(79.9663)	sp|Q6PKG0|LARP1_HUMAN	Q6PKG0	LARP1_HUMAN	LARP1	La-related protein 1		sp|Q6PKG0-3|LARP1_HUMAN	1	1.04499e+06	MS/MS	STY:79.9663@ET(0.0399)ES(0.0399)APGS(0.9203)PR;
ETESAPGSPR	ETES[79.9663]APGS[79.9663]PR	K	A	514	523	10	2	4S(79.9663),8S(79.9663)	sp|Q6PKG0|LARP1_HUMAN	Q6PKG0	LARP1_HUMAN	LARP1	La-related protein 1		sp|Q6PKG0-3|LARP1_HUMAN	1	4474345	MS/MS	STY:79.9663@ET(0.1747)ES(0.9123)APGS(0.9130)PR;
ETPAATEAPSSTPK	ETPAATEAPSS[79.9663]TPK	K	A	185	198	14	2	11S(79.9663)	sp|P80723|BASP1_HUMAN	P80723	BASP1_HUMAN	BASP1	Brain acid soluble protein 1		sp|P80723-2|BASP1_HUMAN	1	1.351917E7	MS/MS	STY:79.9663@ET(0.0099)PAAT(0.0296)EAPS(0.0296)S(0.4655)T(0.4655)PK;
ETPAATEAPSSTPK	ETPAATEAPS[79.9663]STPK	K	A	185	198	14	2	10S(79.9663)	sp|P80723|BASP1_HUMAN	P80723	BASP1_HUMAN	BASP1	Brain acid soluble protein 1		sp|P80723-2|BASP1_HUMAN	2	1.351917E7	MS/MS	STY:79.9663@ET(0.0076)PAAT(0.0087)EAPS(0.3279)S(0.3279)T(0.3279)PK;
ETPAATEAPSSTPK	ETPAAT[79.9663]EAPSSTPK	K	A	185	198	14	2	6T(79.9663)	sp|P80723|BASP1_HUMAN	P80723	BASP1_HUMAN	BASP1	Brain acid soluble protein 1		sp|P80723-2|BASP1_HUMAN	1	1.351917E7	MS/MS	STY:79.9663@ET(0.0060)PAAT(0.2485)EAPS(0.2485)S(0.2485)T(0.2485)PK;
ETPHSPGVEDAPIAK	ETPHS[79.9663]PGVEDAPIAK	R	V	326	340	15	2,3	5S(79.9663)	sp|Q9UHB6-2|LIMA1_HUMAN	Q9UHB6-2	LIMA1_HUMAN	LIMA1	Isoform Alpha of LIM domain and actin-binding protein 1		sp|Q9UHB6-3|LIMA1_HUMAN, sp|Q9UHB6-4|LIMA1_HUMAN, sp|Q9UHB6-5|LIMA1_HUMAN, sp|Q9UHB6|LIMA1_HUMAN	2	1.6205269E7	MS/MS	STY:79.9663@ET(0.0631)PHS(0.9369)PGVEDAPIAK;
ETQSPEQVK	ETQS[79.9663]PEQVK	K	S	491	499	9	2	4S(79.9663)	sp|Q9NYF8-2|BCLF1_HUMAN	Q9NYF8-2	BCLF1_HUMAN	BCLAF1	Isoform 2 of Bcl-2-associated transcription factor 1		sp|Q9NYF8-3|BCLF1_HUMAN, sp|Q9NYF8|BCLF1_HUMAN	1	7089457	MS/MS	STY:79.9663@ET(0.0954)QS(0.9046)PEQVK;
ETVQTTQSPTPVEK	ETVQTTQS[79.9663]PTPVEK	K	E	676	689	14	2	8S(79.9663)	sp|Q9UPN6-2|SCAF8_HUMAN	Q9UPN6-2	SCAF8_HUMAN	SCAF8	Isoform 2 of SR-related and CTD-associated factor 8		sp|Q9UPN6|SCAF8_HUMAN	1	0	MS/MS	STY:79.9663@ET(0.0188)VQT(0.0206)T(0.0206)QS(0.9238)PT(0.0162)PVEK;
ETEEQDSDSAEQGDPAGEGK	ET[79.9663]EEQDSDSAEQGDPAGEGK	R	E	54	73	20	2	2T(79.9663)	sp|O95361|TRI16_HUMAN	O95361	TRI16_HUMAN	TRIM16	Tripartite motif-containing protein 16			2	0	MS/MS	STY:79.9663@ET(0.4760)EEQDS(0.4760)DS(0.0481)AEQGDPAGEGK;
ETESAPGSPR	ET[79.9663]ESAPGSPR	K	A	514	523	10	2	2T(79.9663)	sp|Q6PKG0|LARP1_HUMAN	Q6PKG0	LARP1_HUMAN	LARP1	La-related protein 1		sp|Q6PKG0-3|LARP1_HUMAN	1	668849	MS/MS	STY:79.9663@ET(0.3333)ES(0.3333)APGS(0.3333)PR;
ETESEAEDNLDDLEK	ET[79.9663]ESEAEDNLDDLEK	K	H	871	885	15	2	2T(79.9663)	sp|Q8IYB3|SRRM1_HUMAN	Q8IYB3	SRRM1_HUMAN	SRRM1	Serine/arginine repetitive matrix protein 1		sp|Q8IYB3-2|SRRM1_HUMAN	1	0	MS/MS	STY:79.9663@ET(0.5000)ES(0.5000)EAEDNLDDLEK;
ETPHSPGVEDAPIAK	ET[79.9663]PHSPGVEDAPIAK	R	V	326	340	15	2,3	2T(79.9663)	sp|Q9UHB6-2|LIMA1_HUMAN	Q9UHB6-2	LIMA1_HUMAN	LIMA1	Isoform Alpha of LIM domain and actin-binding protein 1		sp|Q9UHB6-3|LIMA1_HUMAN, sp|Q9UHB6-4|LIMA1_HUMAN, sp|Q9UHB6-5|LIMA1_HUMAN, sp|Q9UHB6|LIMA1_HUMAN	7	1.2688156E7	MS/MS	STY:79.9663@ET(0.5000)PHS(0.5000)PGVEDAPIAK;
ETQSPEQVK	ET[79.9663]QSPEQVK	K	S	491	499	9	2	2T(79.9663)	sp|Q9NYF8-2|BCLF1_HUMAN	Q9NYF8-2	BCLF1_HUMAN	BCLAF1	Isoform 2 of Bcl-2-associated transcription factor 1		sp|Q9NYF8-3|BCLF1_HUMAN, sp|Q9NYF8|BCLF1_HUMAN	2	1.1473484E7	MS/MS	STY:79.9663@ET(0.8796)QS(0.1204)PEQVK;
ETSVSKEDTDHEEK	ET[79.9663]SVSKEDTDHEEK	K	A	114	127	14	3	2T(79.9663)	sp|O75475|PSIP1_HUMAN	O75475	PSIP1_HUMAN	PSIP1	PC4 and SFRS1-interacting protein		sp|O75475-2|PSIP1_HUMAN, sp|O75475-3|PSIP1_HUMAN	1	1.88488e+06	MS/MS	STY:79.9663@ET(0.3296)S(0.3296)VS(0.3296)KEDT(0.0113)DHEEK;
EVDGLLTSEPMGSPVSSK	EVDGLLTSEPMGS[79.9663]PVSSK	K	T	582	599	18	2	13S(79.9663)	sp|Q8WWM7-2|ATX2L_HUMAN	Q8WWM7-2	ATX2L_HUMAN	ATXN2L	Isoform 2 of Ataxin-2-like protein		sp|Q8WWM7-3|ATX2L_HUMAN, sp|Q8WWM7-4|ATX2L_HUMAN, sp|Q8WWM7-5|ATX2L_HUMAN, sp|Q8WWM7-6|ATX2L_HUMAN, sp|Q8WWM7-8|ATX2L_HUMAN, sp|Q8WWM7-9|ATX2L_HUMAN, sp|Q8WWM7|ATX2L_HUMAN	1	3.94935e+06	MS/MS	STY:79.9663@EVDGLLT(0.1699)S(0.0096)EPMGS(0.2735)PVS(0.2735)S(0.2735)K;
EVDGLLTSEPMGSPVSSK	EVDGLLTS[79.9663]EPM[15.9949]GSPVSSK	K	T	582	599	18	2	11M(15.9949),8S(79.9663)	sp|Q8WWM7-2|ATX2L_HUMAN	Q8WWM7-2	ATX2L_HUMAN	ATXN2L	Isoform 2 of Ataxin-2-like protein		sp|Q8WWM7-3|ATX2L_HUMAN, sp|Q8WWM7-4|ATX2L_HUMAN, sp|Q8WWM7-5|ATX2L_HUMAN, sp|Q8WWM7-6|ATX2L_HUMAN, sp|Q8WWM7-8|ATX2L_HUMAN, sp|Q8WWM7-9|ATX2L_HUMAN, sp|Q8WWM7|ATX2L_HUMAN	1	3220398	MS/MS	STY:79.9663@EVDGLLT(0.1792)S(0.2052)EPMGS(0.2052)PVS(0.2052)S(0.2052)K;M:15.9949@EVDGLLTSEPM(1.0000)GSPVSSK;
EVDGLLTSEPMGSPVSSK	EVDGLLT[79.9663]SEPMGSPVSSK	K	T	582	599	18	2	7T(79.9663)	sp|Q8WWM7-2|ATX2L_HUMAN	Q8WWM7-2	ATX2L_HUMAN	ATXN2L	Isoform 2 of Ataxin-2-like protein		sp|Q8WWM7-3|ATX2L_HUMAN, sp|Q8WWM7-4|ATX2L_HUMAN, sp|Q8WWM7-5|ATX2L_HUMAN, sp|Q8WWM7-6|ATX2L_HUMAN, sp|Q8WWM7-8|ATX2L_HUMAN, sp|Q8WWM7-9|ATX2L_HUMAN, sp|Q8WWM7|ATX2L_HUMAN	1	4.14288e+06	MS/MS	STY:79.9663@EVDGLLT(0.4811)S(0.4811)EPMGS(0.0126)PVS(0.0126)S(0.0126)K;
EVDGLLTSEPMGSPVSSK	EVDGLLT[79.9663]SEPM[15.9949]GSPVSSK	K	T	582	599	18	2	11M(15.9949),7T(79.9663)	sp|Q8WWM7-2|ATX2L_HUMAN	Q8WWM7-2	ATX2L_HUMAN	ATXN2L	Isoform 2 of Ataxin-2-like protein		sp|Q8WWM7-3|ATX2L_HUMAN, sp|Q8WWM7-4|ATX2L_HUMAN, sp|Q8WWM7-5|ATX2L_HUMAN, sp|Q8WWM7-6|ATX2L_HUMAN, sp|Q8WWM7-8|ATX2L_HUMAN, sp|Q8WWM7-9|ATX2L_HUMAN, sp|Q8WWM7|ATX2L_HUMAN	1	2569328	MS/MS	STY:79.9663@EVDGLLT(0.3777)S(0.3777)EPMGS(0.0815)PVS(0.0815)S(0.0815)K;M:15.9949@EVDGLLTSEPM(1.0000)GSPVSSK;
EVDPSTGELQSLQMPESEGPSSLDPSQEGPTGLK	EVDPSTGELQSLQMPESEGPSSLDPSQEGPT[79.9663]GLK	K	E	261	294	34	3	31T(79.9663)	sp|Q13501-2|SQSTM_HUMAN	Q13501-2	SQSTM_HUMAN	SQSTM1	Isoform 2 of Sequestosome-1		sp|Q13501|SQSTM_HUMAN	1	2.2490414E7	MS/MS	STY:79.9663@EVDPS(0.1167)T(0.1167)GELQS(0.1167)LQMPES(0.2283)EGPS(0.0138)S(0.0138)LDPS(0.0235)QEGPT(0.3705)GLK;
EVDPSTGELQSLQMPESEGPSSLDPSQEGPTGLK	EVDPSTGELQSLQMPESEGPSSLDPS[79.9663]QEGPTGLK	K	E	261	294	34	3	26S(79.9663)	sp|Q13501-2|SQSTM_HUMAN	Q13501-2	SQSTM_HUMAN	SQSTM1	Isoform 2 of Sequestosome-1		sp|Q13501|SQSTM_HUMAN	1	0	MS/MS	STY:79.9663@EVDPS(0.0126)T(0.0126)GELQS(0.0126)LQMPES(0.0126)EGPS(0.0145)S(0.0145)LDPS(0.9117)QEGPT(0.0090)GLK;
EVDPSTGELQSLQMPESEGPSSLDPSQEGPTGLK	EVDPSTGELQSLQM[15.9949]PESEGPSSLDPSQEGPT[79.9663]GLK	K	E	261	294	34	3	14M(15.9949),31T(79.9663)	sp|Q13501-2|SQSTM_HUMAN	Q13501-2	SQSTM_HUMAN	SQSTM1	Isoform 2 of Sequestosome-1		sp|Q13501|SQSTM_HUMAN	1	1.2185594E7	MS/MS	STY:79.9663@EVDPS(0.0102)T(0.0148)GELQS(0.0434)LQMPES(0.1088)EGPS(0.1088)S(0.1088)LDPS(0.1088)QEGPT(0.4964)GLK;M:15.9949@EVDPSTGELQSLQM(1.0000)PESEGPSSLDPSQEGPTGLK;
EVDPSTGELQSLQMPESEGPSSLDPSQEGPTGLK	EVDPSTGELQSLQM[15.9949]PESEGPSSLDPS[79.9663]QEGPTGLK	K	E	261	294	34	3	14M(15.9949),26S(79.9663)	sp|Q13501-2|SQSTM_HUMAN	Q13501-2	SQSTM_HUMAN	SQSTM1	Isoform 2 of Sequestosome-1		sp|Q13501|SQSTM_HUMAN	1	1.7522304E7	MS/MS	STY:79.9663@EVDPS(0.0695)T(0.0695)GELQS(0.0695)LQMPES(0.0695)EGPS(0.1067)S(0.1067)LDPS(0.2543)QEGPT(0.2543)GLK;M:15.9949@EVDPSTGELQSLQM(1.0000)PESEGPSSLDPSQEGPTGLK;
EVDPSTGELQSLQMPESEGPSSLDPSQEGPTGLK	EVDPS[79.9663]TGELQSLQM[15.9949]PESEGPSSLDPSQEGPTGLK	K	E	261	294	34	3,4	14M(15.9949),5S(79.9663)	sp|Q13501-2|SQSTM_HUMAN	Q13501-2	SQSTM_HUMAN	SQSTM1	Isoform 2 of Sequestosome-1		sp|Q13501|SQSTM_HUMAN	3	3.0979724E7	MS/MS	STY:79.9663@EVDPS(0.2960)T(0.2960)GELQS(0.0187)LQMPES(0.1749)EGPS(0.0660)S(0.0660)LDPS(0.0660)QEGPT(0.0165)GLK;M:15.9949@EVDPSTGELQSLQM(1.0000)PESEGPSSLDPSQEGPTGLK;
EVDYSDSLTEK	EVDY[79.9663]SDSLTEK	K	Q	1343	1353	11	2	4Y(79.9663)	sp|P51532-2|SMCA4_HUMAN	P51532-2	SMCA4_HUMAN	SMARCA4	Isoform 2 of Transcription activator BRG1		sp|P51532-3|SMCA4_HUMAN, sp|P51532-4|SMCA4_HUMAN, sp|P51532-5|SMCA4_HUMAN, sp|P51532|SMCA4_HUMAN	1	1.1414e+06	MS/MS	STY:79.9663@EVDY(0.2500)S(0.2500)DS(0.2500)LT(0.2500)EK;
EVEDKESEGEEEDEDEDLSK	EVEDKESEGEEEDEDEDLS[79.9663]K	K	Y	147	166	20	2,3	19S(79.9663)	sp|O95218-2|ZRAB2_HUMAN	O95218-2	ZRAB2_HUMAN	ZRANB2	Isoform 2 of Zinc finger Ran-binding domain-containing protein 2		sp|O95218|ZRAB2_HUMAN	4	5.7429748E7	MS/MS	STY:79.9663@EVEDKES(0.3803)EGEEEDEDEDLS(0.6197)K;
EVEDKESEGEEEDEDEDLSK	EVEDKES[79.9663]EGEEEDEDEDLSK	K	Y	147	166	20	2,3	7S(79.9663)	sp|O95218-2|ZRAB2_HUMAN	O95218-2	ZRAB2_HUMAN	ZRANB2	Isoform 2 of Zinc finger Ran-binding domain-containing protein 2		sp|O95218|ZRAB2_HUMAN	11	5.7429748E7	MS/MS	STY:79.9663@EVEDKES(0.9360)EGEEEDEDEDLS(0.0640)K;
EVEEDSEDEEMSEDEEDDSSGEEVVIPQK	EVEEDSEDEEMSEDEEDDS[79.9663]S[79.9663]GEEVVIPQK	K	K	23	51	29	3	19S(79.9663),20S(79.9663)	sp|P19338|NUCL_HUMAN	P19338	NUCL_HUMAN	NCL	Nucleolin			1	9608590	MS/MS	STY:79.9663@EVEEDS(0.1288)EDEEMS(0.3448)EDEEDDS(0.7632)S(0.7632)GEEVVIPQK;
EVEEDSEDEEMSEDEEDDSSGEEVVIPQK	EVEEDSEDEEMS[79.9663]EDEEDDS[79.9663]S[79.9663]GEEVVIPQK	K	K	23	51	29	3	12S(79.9663),19S(79.9663),20S(79.9663)	sp|P19338|NUCL_HUMAN	P19338	NUCL_HUMAN	NCL	Nucleolin			3	1.65120096E8	MS/MS	STY:79.9663@EVEEDS(0.2241)EDEEMS(0.9253)EDEEDDS(0.9253)S(0.9253)GEEVVIPQK;
EVEEDSEDEEMSEDEEDDSSGEEVVIPQK	EVEEDS[79.9663]EDEEMSEDEEDDS[79.9663]S[79.9663]GEEVVIPQK	K	K	23	51	29	3	19S(79.9663),20S(79.9663),6S(79.9663)	sp|P19338|NUCL_HUMAN	P19338	NUCL_HUMAN	NCL	Nucleolin			6	1.65120096E8	MS/MS	STY:79.9663@EVEEDS(0.9217)EDEEMS(0.2347)EDEEDDS(0.9218)S(0.9218)GEEVVIPQK;
EVEEDSEDEEMSEDEEDDSSGEEVVIPQK	EVEEDS[79.9663]EDEEMS[79.9663]EDEEDDSSGEEVVIPQK	K	K	23	51	29	3	12S(79.9663),6S(79.9663)	sp|P19338|NUCL_HUMAN	P19338	NUCL_HUMAN	NCL	Nucleolin			3	9608590	MS/MS	STY:79.9663@EVEEDS(0.5264)EDEEMS(0.4912)EDEEDDS(0.4912)S(0.4912)GEEVVIPQK;
EVEEDSEDEEMSEDEEDDSSGEEVVIPQK	EVEEDS[79.9663]EDEEMS[79.9663]EDEEDDS[79.9663]SGEEVVIPQK	K	K	23	51	29	3	12S(79.9663),19S(79.9663),6S(79.9663)	sp|P19338|NUCL_HUMAN	P19338	NUCL_HUMAN	NCL	Nucleolin			11	2.13538592E8	MS/MS	STY:79.9663@EVEEDS(0.8024)EDEEMS(0.8062)EDEEDDS(0.8043)S(0.5871)GEEVVIPQK;
EVEEDSEDEEMSEDEEDDSSGEEVVIPQKK	EVEEDS[79.9663]EDEEMS[79.9663]EDEEDDS[79.9663]SGEEVVIPQKK	K	G	23	52	30	3	12S(79.9663),19S(79.9663),6S(79.9663)	sp|P19338|NUCL_HUMAN	P19338	NUCL_HUMAN	NCL	Nucleolin			1	0	MS/MS	STY:79.9663@EVEEDS(0.8074)EDEEMS(0.8074)EDEEDDS(0.8113)S(0.5738)GEEVVIPQKK;
EVEEDSEDEEMSEDEEDDSSGEEVVIPQK	EVEEDS[79.9663]EDEEM[15.9949]S[79.9663]EDEEDDSSGEEVVIPQK	K	K	23	51	29	3	11M(15.9949),12S(79.9663),6S(79.9663)	sp|P19338|NUCL_HUMAN	P19338	NUCL_HUMAN	NCL	Nucleolin			1	0	MS/MS	STY:79.9663@EVEEDS(0.5000)EDEEMS(0.5000)EDEEDDS(0.5000)S(0.5000)GEEVVIPQK;M:15.9949@EVEEDSEDEEM(1.0000)SEDEEDDSSGEEVVIPQK;
EVENEDEDDDDSDK	EVENEDEDDDDS[79.9663]DK	K	E	31	44	14	2	12S(79.9663)	sp|Q9P287-2|BCCIP_HUMAN	Q9P287-2	BCCIP_HUMAN	BCCIP	Isoform 2 of BRCA2 and CDKN1A-interacting protein		sp|Q9P287-3|BCCIP_HUMAN, sp|Q9P287-4|BCCIP_HUMAN, sp|Q9P287|BCCIP_HUMAN	1	0	MS/MS	STY:79.9663@EVENEDEDDDDS(1.0000)DK;
EVLYDSEGLSGEER	EVLY[79.9663]DSEGLS[79.9663]GEER	R	G	729	742	14	2	10S(79.9663),4Y(79.9663)	sp|Q9H7N4|SFR19_HUMAN	Q9H7N4	SFR19_HUMAN	SCAF1	Splicing factor, arginine/serine-rich 19			1	2.64507e+06	MS/MS	STY:79.9663@EVLY(0.6625)DS(0.6625)EGLS(0.6750)GEER;
EVQAEQPSSSSPR	EVQAEQPSSS[79.9663]SPR	R	R	178	190	13	2	10S(79.9663)	sp|Q9Y388|RBMX2_HUMAN	Q9Y388	RBMX2_HUMAN	RBMX2	RNA-binding motif protein, X-linked 2			1	0	MS/MS	STY:79.9663@EVQAEQPS(0.0850)S(0.0850)S(0.4150)S(0.4150)PR;
EVQAEQPSSSSPR	EVQAEQPS[79.9663]SSSPR	R	R	178	190	13	2	8S(79.9663)	sp|Q9Y388|RBMX2_HUMAN	Q9Y388	RBMX2_HUMAN	RBMX2	RNA-binding motif protein, X-linked 2			1	0	MS/MS	STY:79.9663@EVQAEQPS(0.2500)S(0.2500)S(0.2500)S(0.2500)PR;
EVSSRPSTPGLSVVSGISATSEDIPNK	EVSSRPS[79.9663]TPGLS[79.9663]VVSGISATSEDIPNK	R	I	755	781	27	3	12S(79.9663),7S(79.9663)	sp|Q14C86-2|GAPD1_HUMAN	Q14C86-2	GAPD1_HUMAN	GAPVD1	Isoform 2 of GTPase-activating protein and VPS9 domain-containing protein 1		sp|Q14C86-3|GAPD1_HUMAN, sp|Q14C86-4|GAPD1_HUMAN, sp|Q14C86-5|GAPD1_HUMAN, sp|Q14C86-6|GAPD1_HUMAN, sp|Q14C86|GAPD1_HUMAN	1	9658465	MS/MS	STY:79.9663@EVS(0.1047)S(0.1047)RPS(0.5199)T(0.5199)PGLS(0.6446)VVS(0.0266)GIS(0.0266)AT(0.0266)S(0.0266)EDIPNK;
EVSDDEAEEK	EVS[79.9663]DDEAEEK	K	E	351	360	10	2	3S(79.9663)	sp|P07900-2|HS90A_HUMAN	P07900-2	HS90A_HUMAN	HSP90AA1	Isoform 2 of Heat shock protein HSP 90-alpha		sp|P07900|HS90A_HUMAN	10	2.19633376E8	MS/MS	STY:79.9663@EVS(1.0000)DDEAEEK;
EVSDDEAEEKEDKEEEK	EVS[79.9663]DDEAEEKEDKEEEK	K	E	351	367	17	2,3	3S(79.9663)	sp|P07900-2|HS90A_HUMAN	P07900-2	HS90A_HUMAN	HSP90AA1	Isoform 2 of Heat shock protein HSP 90-alpha		sp|P07900|HS90A_HUMAN	9	9.1403536E7	MS/MS	STY:79.9663@EVS(1.0000)DDEAEEKEDKEEEK;
EVSDSEAGGGPQGER	EVS[79.9663]DSEAGGGPQGER	R	K	368	382	15	2	3S(79.9663)	sp|Q9BW71|HIRP3_HUMAN	Q9BW71	HIRP3_HUMAN	HIRIP3	HIRA-interacting protein 3			1	609963	MS/MS	STY:79.9663@EVS(0.5000)DS(0.5000)EAGGGPQGER;
EVSDSEAGGGPQGER	EVS[79.9663]DS[79.9663]EAGGGPQGER	R	K	368	382	15	2	3S(79.9663),5S(79.9663)	sp|Q9BW71|HIRP3_HUMAN	Q9BW71	HIRP3_HUMAN	HIRIP3	HIRA-interacting protein 3			1	916749	MS/MS	STY:79.9663@EVS(1.0000)DS(1.0000)EAGGGPQGER;
EVSSRPSTPGLSVVSGISATSEDIPNK	EVS[79.9663]S[79.9663]RPSTPGLSVVSGISATSEDIPNK	R	I	755	781	27	3	3S(79.9663),4S(79.9663)	sp|Q14C86-2|GAPD1_HUMAN	Q14C86-2	GAPD1_HUMAN	GAPVD1	Isoform 2 of GTPase-activating protein and VPS9 domain-containing protein 1		sp|Q14C86-3|GAPD1_HUMAN, sp|Q14C86-4|GAPD1_HUMAN, sp|Q14C86-5|GAPD1_HUMAN, sp|Q14C86-6|GAPD1_HUMAN, sp|Q14C86|GAPD1_HUMAN	4	1.4385731E7	MS/MS	STY:79.9663@EVS(0.3738)S(0.3738)RPS(0.0853)T(0.3738)PGLS(0.3738)VVS(0.0459)GIS(0.1245)AT(0.1245)S(0.1245)EDIPNK;
EVVKPVPITSPAVSK	EVVKPVPITS[79.9663]PAVSK	K	V	102	116	15	2	10S(79.9663)	sp|Q96HC4|PDLI5_HUMAN	Q96HC4	PDLI5_HUMAN	PDLIM5	PDZ and LIM domain protein 5			1	1.26028e+06	MS/MS	STY:79.9663@EVVKPVPIT(0.0472)S(0.7620)PAVS(0.1908)K;
EVYELLDSPGK	EVYELLDS[79.9663]PGK	K	V	20	30	11	2	8S(79.9663)	sp|P22234-2|PUR6_HUMAN	P22234-2	PUR6_HUMAN	PAICS	Isoform 2 of Bifunctional phosphoribosylaminoimidazole carboxylase/phosphoribosylaminoimidazole succinocarboxamide synthetase		sp|P22234|PUR6_HUMAN	1	1.12585e+06	MS/MS	STY:79.9663@EVY(0.1177)ELLDS(0.8823)PGK;
EWNGVVSESDSPVK	EWNGVVSESDS[79.9663]PVK	K	R	41	54	14	2	11S(79.9663)	sp|P18858-2|DNLI1_HUMAN	P18858-2	DNLI1_HUMAN	LIG1	Isoform 2 of DNA ligase 1		sp|P18858-3|DNLI1_HUMAN, sp|P18858|DNLI1_HUMAN	1	0	MS/MS	STY:79.9663@EWNGVVS(0.0489)ES(0.0489)DS(0.9021)PVK;
EYIPGQPPLSQSSDSSPTR	EYIPGQPPLSQSSDSS[79.9663]PT[79.9663]R	K	N	871	889	19	2	16S(79.9663),18T(79.9663)	sp|P07814|SYEP_HUMAN	P07814	SYEP_HUMAN	EPRS1	Bifunctional glutamate/proline--tRNA ligase			1	4171648	MS/MS	STY:79.9663@EY(0.0285)IPGQPPLS(0.0285)QS(0.0382)S(0.0658)DS(0.0658)S(0.8865)PT(0.8865)R;
EYIPGQPPLSQSSDSSPTR	EYIPGQPPLSQSS[79.9663]DSSPTR	K	N	871	889	19	3	13S(79.9663)	sp|P07814|SYEP_HUMAN	P07814	SYEP_HUMAN	EPRS1	Bifunctional glutamate/proline--tRNA ligase			1	3719342	MS/MS	STY:79.9663@EY(0.0105)IPGQPPLS(0.0105)QS(0.0105)S(0.2421)DS(0.2421)S(0.2421)PT(0.2421)R;
EYIPGQPPLSQSSDSSPTR	EYIPGQPPLSQS[79.9663]SDSSPTR	K	N	871	889	19	2	12S(79.9663)	sp|P07814|SYEP_HUMAN	P07814	SYEP_HUMAN	EPRS1	Bifunctional glutamate/proline--tRNA ligase			2	2.4770488E7	MS/MS	STY:79.9663@EY(0.0098)IPGQPPLS(0.0167)QS(0.4747)S(0.4747)DS(0.0080)S(0.0080)PT(0.0080)R;
EYIPGQPPLSQSSDSSPTR	EYIPGQPPLS[79.9663]QSSDSSPTR	K	N	871	889	19	2	10S(79.9663)	sp|P07814|SYEP_HUMAN	P07814	SYEP_HUMAN	EPRS1	Bifunctional glutamate/proline--tRNA ligase			4	2.4770488E7	MS/MS	STY:79.9663@EY(0.0037)IPGQPPLS(0.1660)QS(0.1660)S(0.1660)DS(0.1660)S(0.1660)PT(0.1660)R;
EYVSNDAAQSDDEEK	EYVSNDAAQS[79.9663]DDEEK	K	L	394	408	15	2	10S(79.9663)	sp|Q5JSH3-2|WDR44_HUMAN	Q5JSH3-2	WDR44_HUMAN	WDR44	Isoform 2 of WD repeat-containing protein 44		sp|Q5JSH3-4|WDR44_HUMAN, sp|Q5JSH3|WDR44_HUMAN	1	3.63392e+06	MS/MS	STY:79.9663@EY(0.0398)VS(0.0398)NDAAQS(0.9205)DDEEK;
EYFDDSTEER	EY[79.9663]FDDSTEER	K	F	259	268	10	2	2Y(79.9663)	sp|Q8NEF9|SRFB1_HUMAN	Q8NEF9	SRFB1_HUMAN	SRFBP1	Serum response factor-binding protein 1			1	1.1938e+06	MS/MS	STY:79.9663@EY(0.3333)FDDS(0.3333)T(0.3333)EER;
EYIPGQPPLSQSSDSSPTRNSEPAGLETPEAK	EY[79.9663]IPGQPPLSQSSDSSPTRNSEPAGLETPEAK	K	V	871	902	32	3	2Y(79.9663)	sp|P07814|SYEP_HUMAN	P07814	SYEP_HUMAN	EPRS1	Bifunctional glutamate/proline--tRNA ligase			1	3387911	MS/MS	STY:79.9663@EY(0.1111)IPGQPPLS(0.1111)QS(0.1111)S(0.1111)DS(0.1111)S(0.1111)PT(0.1111)RNS(0.1111)EPAGLET(0.1111)PEAK;
FASDDEHDEHDENGATGPVK	FAS[79.9663]DDEHDEHDENGATGPVK	K	R	364	383	20	2,3	3S(79.9663)	sp|P05455|LA_HUMAN	P05455	LA_HUMAN	SSB	Lupus La protein			10	6.6209344E7	MS/MS	STY:79.9663@FAS(0.9276)DDEHDEHDENGAT(0.0724)GPVK;
FDHESSPGTDEDK	FDHES[79.9663]S[79.9663]PGT[79.9663]DEDK	K	S	740	752	13	2	5S(79.9663),6S(79.9663),9T(79.9663)	sp|Q13427|PPIG_HUMAN	Q13427	PPIG_HUMAN	PPIG	Peptidyl-prolyl cis-trans isomerase G			2	1.82173e+06	MS/MS	STY:79.9663@FDHES(1.0000)S(1.0000)PGT(1.0000)DEDK;
FEDEGAGFEESSETGDYEEK	FEDEGAGFEES[79.9663]SETGDYEEK	K	A	926	945	20	2,3	11S(79.9663)	sp|P46821|MAP1B_HUMAN	P46821	MAP1B_HUMAN	MAP1B	Microtubule-associated protein 1B			3	1.0590933E7	MS/MS	STY:79.9663@FEDEGAGFEES(0.3130)S(0.3130)ET(0.3130)GDY(0.0610)EEK;
FEEESKEPVADEEEEDSDDDVEPITEFR	FEEESKEPVADEEEEDSDDDVEPIT[79.9663]EFR	K	F	86	113	28	3	25T(79.9663)	sp|P54105|ICLN_HUMAN	P54105	ICLN_HUMAN	CLNS1A	Methylosome subunit pICln			1	7830012	MS/MS	STY:79.9663@FEEES(0.1469)KEPVADEEEEDS(0.2237)DDDVEPIT(0.6294)EFR;
FEEESKEPVADEEEEDSDDDVEPITEFR	FEEESKEPVADEEEEDS[79.9663]DDDVEPITEFR	K	F	86	113	28	3	17S(79.9663)	sp|P54105|ICLN_HUMAN	P54105	ICLN_HUMAN	CLNS1A	Methylosome subunit pICln			7	2.7850836E7	MS/MS	STY:79.9663@FEEES(0.0560)KEPVADEEEEDS(0.9153)DDDVEPIT(0.0288)EFR;
FEEESKEPVADEEEEDSDDDVEPITEFR	FEEES[79.9663]KEPVADEEEEDSDDDVEPITEFR	K	F	86	113	28	3	5S(79.9663)	sp|P54105|ICLN_HUMAN	P54105	ICLN_HUMAN	CLNS1A	Methylosome subunit pICln			2	2.0020824E7	MS/MS	STY:79.9663@FEEES(0.4846)KEPVADEEEEDS(0.4846)DDDVEPIT(0.0309)EFR;
FGESEEVEMEVESDEEDDK	FGESEEVEMEVES[79.9663]DEEDDK	K	Q	317	335	19	2,3	13S(79.9663)	sp|Q15459|SF3A1_HUMAN	Q15459	SF3A1_HUMAN	SF3A1	Splicing factor 3A subunit 1		sp|Q15459-2|SF3A1_HUMAN	3	3.1366728E7	MS/MS	STY:79.9663@FGES(0.0786)EEVEMEVES(0.9214)DEEDDK;
FGESEEVEMEVESDEEDDK	FGES[79.9663]EEVEMEVESDEEDDK	K	Q	317	335	19	2,3	4S(79.9663)	sp|Q15459|SF3A1_HUMAN	Q15459	SF3A1_HUMAN	SF3A1	Splicing factor 3A subunit 1		sp|Q15459-2|SF3A1_HUMAN	7	3.1737596E7	MS/MS	STY:79.9663@FGES(0.8585)EEVEMEVES(0.1415)DEEDDK;
FGESEEVEMEVESDEEDDKQEK	FGES[79.9663]EEVEM[15.9949]EVESDEEDDKQEK	K	A	317	338	22	3	4S(79.9663),9M(15.9949)	sp|Q15459|SF3A1_HUMAN	Q15459	SF3A1_HUMAN	SF3A1	Splicing factor 3A subunit 1		sp|Q15459-2|SF3A1_HUMAN	1	4.99284e+06	MS/MS	STY:79.9663@FGES(0.7432)EEVEMEVES(0.2568)DEEDDKQEK;M:15.9949@FGESEEVEM(1.0000)EVESDEEDDKQEK;
FGQAATMEGIGAIGGTPPAFNR	FGQAAT[79.9663]M[15.9949]EGIGAIGGTPPAFNR	R	A	346	367	22	3	6T(79.9663),7M(15.9949)	sp|Q15233-2|NONO_HUMAN	Q15233-2	NONO_HUMAN	NONO	Isoform 2 of Non-POU domain-containing octamer-binding protein		sp|Q15233|NONO_HUMAN	1	1.15531e+06	MS/MS	STY:79.9663@FGQAAT(0.5000)MEGIGAIGGT(0.5000)PPAFNR;M:15.9949@FGQAATM(1.0000)EGIGAIGGTPPAFNR;
FHSSDSEEEEHK	FHS[79.9663]S[79.9663]DSEEEEHK	K	K	360	371	12	2,3	3S(79.9663),4S(79.9663)	sp|Q96ST2|IWS1_HUMAN	Q96ST2	IWS1_HUMAN	IWS1	Protein IWS1 homolog		sp|Q96ST2-2|IWS1_HUMAN, sp|Q96ST2-3|IWS1_HUMAN	3	8576704	MS/MS	STY:79.9663@FHS(0.8949)S(0.8949)DS(0.2102)EEEEHK;
FLETDSEEEQEEVNEK	FLET[79.9663]DS[79.9663]EEEQEEVNEK	R	K	817	832	16	2	4T(79.9663),6S(79.9663)	sp|Q76FK4-2|NOL8_HUMAN	Q76FK4-2	NOL8_HUMAN	NOL8	Isoform 2 of Nucleolar protein 8		sp|Q76FK4-4|NOL8_HUMAN, sp|Q76FK4|NOL8_HUMAN	2	6083519	MS/MS	STY:79.9663@FLET(1.0000)DS(1.0000)EEEQEEVNEK;
FNDSEGDDTEETEDYR	FNDS[79.9663]EGDDTEETEDYR	K	Q	392	407	16	2	4S(79.9663)	sp|Q9NYF8-2|BCLF1_HUMAN	Q9NYF8-2	BCLF1_HUMAN	BCLAF1	Isoform 2 of Bcl-2-associated transcription factor 1		sp|Q9NYF8-3|BCLF1_HUMAN, sp|Q9NYF8|BCLF1_HUMAN	8	3.3226042E7	MS/MS	STY:79.9663@FNDS(0.9263)EGDDT(0.0246)EET(0.0246)EDY(0.0246)R;
FNDSEGDDTEETEDYR	FNDS[79.9663]EGDDT[79.9663]EETEDYR	K	Q	392	407	16	2	4S(79.9663),9T(79.9663)	sp|Q9NYF8-2|BCLF1_HUMAN	Q9NYF8-2	BCLF1_HUMAN	BCLAF1	Isoform 2 of Bcl-2-associated transcription factor 1		sp|Q9NYF8-3|BCLF1_HUMAN, sp|Q9NYF8|BCLF1_HUMAN	1	1.6839e+06	MS/MS	STY:79.9663@FNDS(0.5000)EGDDT(0.5000)EET(0.5000)EDY(0.5000)R;
FNEEHIPDSPFVVPVASPSGDAR	FNEEHIPDS[79.9663]PFVVPVASPSGDAR	K	R	2303	2325	23	3	9S(79.9663)	sp|P21333-2|FLNA_HUMAN	P21333-2	FLNA_HUMAN	FLNA	Isoform 2 of Filamin-A		sp|P21333|FLNA_HUMAN	1	0	MS/MS	STY:79.9663@FNEEHIPDS(0.3333)PFVVPVAS(0.3333)PS(0.3333)GDAR;
FQSEEQQQTEDELQDK	FQSEEQQQT[79.9663]EDELQDK	K	I	48	63	16	2	9T(79.9663)	sp|P02666|CASB_BOVIN	P02666	CASB_BOVIN	CSN2	Beta-casein			1	7240299	MS/MS	STY:79.9663@FQS(0.4915)EEQQQT(0.5085)EDELQDK;
FQSQADQDQQASGLQSPPSR	FQSQADQDQQAS[79.9663]GLQSPPSR	K	D	466	485	20	3	12S(79.9663)	sp|Q9P2B4|CT2NL_HUMAN	Q9P2B4	CT2NL_HUMAN	CTTNBP2NL	CTTNBP2 N-terminal-like protein			1	0	MS/MS	STY:79.9663@FQS(0.2614)QADQDQQAS(0.3393)GLQS(0.3393)PPS(0.0600)R;
FQSEEQQQTEDELQDK	FQS[79.9663]EEQQQTEDELQDK	K	I	48	63	16	2,3	3S(79.9663)	sp|P02666|CASB_BOVIN	P02666	CASB_BOVIN	CSN2	Beta-casein			3	7893418	MS/MS	STY:79.9663@FQS(0.9327)EEQQQT(0.0673)EDELQDK;
FSEMMNNMGGDEDVDLPEVDGADDDSQDSDDEK	FSEMMNNMGGDEDVDLPEVDGADDDS[79.9663]QDS[79.9663]DDEK	R	M	90	122	33	3	26S(79.9663),29S(79.9663)	sp|Q15185-2|TEBP_HUMAN	Q15185-2	TEBP_HUMAN	PTGES3	Isoform 2 of Prostaglandin E synthase 3		sp|Q15185|TEBP_HUMAN	2	2.95519712E8	MS/MS	STY:79.9663@FS(0.1114)EMMNNMGGDEDVDLPEVDGADDDS(0.9443)QDS(0.9443)DDEK;
FSEMMNNMGGDEDVDLPEVDGADDDSQDSDDEK	FSEMMNNM[15.9949]GGDEDVDLPEVDGADDDS[79.9663]QDS[79.9663]DDEK	R	M	90	122	33	3	26S(79.9663),29S(79.9663),8M(15.9949)	sp|Q15185-2|TEBP_HUMAN	Q15185-2	TEBP_HUMAN	PTGES3	Isoform 2 of Prostaglandin E synthase 3		sp|Q15185|TEBP_HUMAN	2	1.11416272E8	MS/MS	STY:79.9663@FS(0.1897)EMMNNMGGDEDVDLPEVDGADDDS(0.9051)QDS(0.9051)DDEK;M:15.9949@FSEM(0.0513)M(0.0513)NNM(0.8973)GGDEDVDLPEVDGADDDSQDSDDEK;
FSEMMNNMGGDEDVDLPEVDGADDDSQDSDDEK	FSEM[15.9949]MNNMGGDEDVDLPEVDGADDDS[79.9663]QDS[79.9663]DDEK	R	M	90	122	33	3	26S(79.9663),29S(79.9663),4M(15.9949)	sp|Q15185-2|TEBP_HUMAN	Q15185-2	TEBP_HUMAN	PTGES3	Isoform 2 of Prostaglandin E synthase 3		sp|Q15185|TEBP_HUMAN	3	1.15963344E8	MS/MS	STY:79.9663@FS(0.4044)EMMNNMGGDEDVDLPEVDGADDDS(0.7978)QDS(0.7978)DDEK;M:15.9949@FSEM(0.4912)M(0.4912)NNM(0.0176)GGDEDVDLPEVDGADDDSQDSDDEK;
FSEMMNNMGGDEDVDLPEVDGADDDSQDSDDEK	FSEM[15.9949]M[15.9949]NNMGGDEDVDLPEVDGADDDS[79.9663]QDSDDEK	R	M	90	122	33	3	26S(79.9663),4M(15.9949),5M(15.9949)	sp|Q15185-2|TEBP_HUMAN	Q15185-2	TEBP_HUMAN	PTGES3	Isoform 2 of Prostaglandin E synthase 3		sp|Q15185|TEBP_HUMAN	1	2.12304e+06	MS/MS	STY:79.9663@FS(0.0968)EMMNNMGGDEDVDLPEVDGADDDS(0.4516)QDS(0.4516)DDEK;M:15.9949@FSEM(0.6667)M(0.6667)NNM(0.6667)GGDEDVDLPEVDGADDDSQDSDDEK;
FSEMMNNMGGDEDVDLPEVDGADDDSQDSDDEK	FS[79.9663]EMMNNMGGDEDVDLPEVDGADDDSQDS[79.9663]DDEK	R	M	90	122	33	3	29S(79.9663),2S(79.9663)	sp|Q15185-2|TEBP_HUMAN	Q15185-2	TEBP_HUMAN	PTGES3	Isoform 2 of Prostaglandin E synthase 3		sp|Q15185|TEBP_HUMAN	1	2.52959232E8	MS/MS	STY:79.9663@FS(0.8428)EMMNNMGGDEDVDLPEVDGADDDS(0.3065)QDS(0.8507)DDEK;
FSEMMNNMGGDEDVDLPEVDGADDDSQDSDDEK	FS[79.9663]EMMNNMGGDEDVDLPEVDGADDDS[79.9663]QDSDDEK	R	M	90	122	33	3	26S(79.9663),2S(79.9663)	sp|Q15185-2|TEBP_HUMAN	Q15185-2	TEBP_HUMAN	PTGES3	Isoform 2 of Prostaglandin E synthase 3		sp|Q15185|TEBP_HUMAN	2	2.89059008E8	MS/MS	STY:79.9663@FS(0.9155)EMMNNMGGDEDVDLPEVDGADDDS(0.9345)QDS(0.1500)DDEK;
FSEMMNNMGGDEDVDLPEVDGADDDSQDSDDEK	FS[79.9663]EMMNNM[15.9949]GGDEDVDLPEVDGADDDSQDS[79.9663]DDEK	R	M	90	122	33	3	29S(79.9663),2S(79.9663),8M(15.9949)	sp|Q15185-2|TEBP_HUMAN	Q15185-2	TEBP_HUMAN	PTGES3	Isoform 2 of Prostaglandin E synthase 3		sp|Q15185|TEBP_HUMAN	1	5.0538992E7	MS/MS	STY:79.9663@FS(0.6665)EMMNNMGGDEDVDLPEVDGADDDS(0.6492)QDS(0.6843)DDEK;M:15.9949@FSEM(0.1815)M(0.1815)NNM(0.6370)GGDEDVDLPEVDGADDDSQDSDDEK;
FSEMMNNMGGDEDVDLPEVDGADDDSQDSDDEK	FS[79.9663]EMM[15.9949]NNMGGDEDVDLPEVDGADDDS[79.9663]QDSDDEK	R	M	90	122	33	3	26S(79.9663),2S(79.9663),5M(15.9949)	sp|Q15185-2|TEBP_HUMAN	Q15185-2	TEBP_HUMAN	PTGES3	Isoform 2 of Prostaglandin E synthase 3		sp|Q15185|TEBP_HUMAN	2	5.0538992E7	MS/MS	STY:79.9663@FS(0.6841)EMMNNMGGDEDVDLPEVDGADDDS(0.6579)QDS(0.6579)DDEK;M:15.9949@FSEM(0.0364)M(0.8991)NNM(0.0645)GGDEDVDLPEVDGADDDSQDSDDEK;
FSEMMNNMGGDEDVDLPEVDGADDDSQDSDDEK	FS[79.9663]EM[15.9949]MNNMGGDEDVDLPEVDGADDDS[79.9663]QDSDDEK	R	M	90	122	33	3	26S(79.9663),2S(79.9663),4M(15.9949)	sp|Q15185-2|TEBP_HUMAN	Q15185-2	TEBP_HUMAN	PTGES3	Isoform 2 of Prostaglandin E synthase 3		sp|Q15185|TEBP_HUMAN	3	5.0538992E7	MS/MS	STY:79.9663@FS(0.6832)EMMNNMGGDEDVDLPEVDGADDDS(0.6584)QDS(0.6584)DDEK;M:15.9949@FSEM(0.4894)M(0.4894)NNM(0.0212)GGDEDVDLPEVDGADDDSQDSDDEK;
FSGEEGEIEDDESGTENR	FS[79.9663]GEEGEIEDDESGTENR	K	E	927	944	18	2	2S(79.9663)	sp|Q9Y2W1|TR150_HUMAN	Q9Y2W1	TR150_HUMAN	THRAP3	Thyroid hormone receptor-associated protein 3			1	1.2616e+06	MS/MS	STY:79.9663@FS(0.9080)GEEGEIEDDES(0.0460)GT(0.0460)ENR;
FSGEEGEIEDDESGTENR	FS[79.9663]GEEGEIEDDESGT[79.9663]ENR	K	E	927	944	18	2	15T(79.9663),2S(79.9663)	sp|Q9Y2W1|TR150_HUMAN	Q9Y2W1	TR150_HUMAN	THRAP3	Thyroid hormone receptor-associated protein 3			1	4238993	MS/MS	STY:79.9663@FS(0.9030)GEEGEIEDDES(0.1937)GT(0.9033)ENR;
FSPTMGR	FS[79.9663]PTMGR	R	H	394	400	7	2	2S(79.9663)	sp|P78344-2|IF4G2_HUMAN	P78344-2	IF4G2_HUMAN	EIF4G2	Isoform 2 of Eukaryotic translation initiation factor 4 gamma 2		sp|P78344|IF4G2_HUMAN	1	1.40178e+06	MS/MS	STY:79.9663@FS(0.5000)PT(0.5000)MGR;
FSPVLGR	FS[79.9663]PVLGR	R	A	461	467	7	2	2S(79.9663)	sp|Q9NRG9-2|AAAS_HUMAN	Q9NRG9-2	AAAS_HUMAN	AAAS	Isoform 2 of Aladin		sp|Q9NRG9|AAAS_HUMAN	2	1.34583e+06	MS/MS	STY:79.9663@FS(1.0000)PVLGR;
FTPPAESGSPSK	FTPPAESGSPS[79.9663]K	K	E	1004	1015	12	2	11S(79.9663)	sp|Q70E73|RAPH1_HUMAN	Q70E73	RAPH1_HUMAN	RAPH1	Ras-associated and pleckstrin homology domains-containing protein 1			1	666726	MS/MS	STY:79.9663@FT(0.1154)PPAES(0.1154)GS(0.1154)PS(0.6539)K;
FTGSFDDDPDPHRDPYGEEVDR	FT[79.9663]GSFDDDPDPHRDPYGEEVDR	R	R	1324	1345	22	3	2T(79.9663)	sp|O15027-2|SC16A_HUMAN	O15027-2	SC16A_HUMAN	SEC16A	Isoform 2 of Protein transport protein Sec16A		sp|O15027-3|SC16A_HUMAN, sp|O15027-4|SC16A_HUMAN, sp|O15027-5|SC16A_HUMAN, sp|O15027|SC16A_HUMAN	1	3.09177e+06	MS/MS	STY:79.9663@FT(0.4883)GS(0.4883)FDDDPDPHRDPY(0.0234)GEEVDR;
FTPVASKFSPGAPGGSGSQPNQK	FT[79.9663]PVASKFSPGAPGGSGSQPNQK	K	L	116	138	23	3	2T(79.9663)	sp|Q15942-2|ZYX_HUMAN	Q15942-2	ZYX_HUMAN	ZYX	Isoform 2 of Zyxin		sp|Q15942|ZYX_HUMAN	1	1.24867e+06	MS/MS	STY:79.9663@FT(0.3221)PVAS(0.3221)KFS(0.3221)PGAPGGS(0.0168)GS(0.0168)QPNQK;
FVEWLQNAEEESESEGEEN	FVEWLQNAEEES[79.9663]ES[79.9663]EGEEN	K	-	401	419	19	2	12S(79.9663),14S(79.9663)	sp|Q9Y6E2|5MP1_HUMAN	Q9Y6E2	5MP1_HUMAN	BZW2	eIF5-mimic protein 1			1	1.8908816E7	MS/MS	STY:79.9663@FVEWLQNAEEES(1.0000)ES(1.0000)EGEEN;
FVGGVYGGNIK	FVGGVY[79.9663]GGNIK	R	P	56	66	11	2	6Y(79.9663)	sp|Q8NAV1|PR38A_HUMAN	Q8NAV1	PR38A_HUMAN	PRPF38A	Pre-mRNA-splicing factor 38A			1	0	MS/MS	STY:79.9663@FVGGVY(1.0000)GGNIK;
GADNDGSGSESGYTTPK	GADNDGSGSESGY[79.9663]T[79.9663]TPK	K	K	206	222	17	2	13Y(79.9663),14T(79.9663)	sp|Q7Z417|NUFP2_HUMAN	Q7Z417	NUFP2_HUMAN	NUFIP2	FMR1-interacting protein NUFIP2			1	1.58562e+06	MS/MS	STY:79.9663@GADNDGS(0.1707)GS(0.1707)ES(0.1707)GY(0.7144)T(0.7144)T(0.0590)PK;
GADNDGSGSESGYTTPK	GADNDGS[79.9663]GSESGYTTPK	K	K	206	222	17	2	7S(79.9663)	sp|Q7Z417|NUFP2_HUMAN	Q7Z417	NUFP2_HUMAN	NUFIP2	FMR1-interacting protein NUFIP2			2	1.42686e+06	MS/MS	STY:79.9663@GADNDGS(0.4560)GS(0.4560)ES(0.0244)GY(0.0244)T(0.0244)T(0.0146)PK;
GADNDGSGSESGYTTPK	GADNDGS[79.9663]GS[79.9663]ESGYTTPK	K	K	206	222	17	2	7S(79.9663),9S(79.9663)	sp|Q7Z417|NUFP2_HUMAN	Q7Z417	NUFP2_HUMAN	NUFIP2	FMR1-interacting protein NUFIP2			2	3.37922e+06	MS/MS	STY:79.9663@GADNDGS(0.7803)GS(0.7803)ES(0.1213)GY(0.1213)T(0.1213)T(0.0753)PK;
GAEETSWSGEER	GAEET[79.9663]SWSGEER	K	A	958	969	12	2	5T(79.9663)	sp|Q9H7N4|SFR19_HUMAN	Q9H7N4	SFR19_HUMAN	SCAF1	Splicing factor, arginine/serine-rich 19			1	0	MS/MS	STY:79.9663@GAEET(0.3333)S(0.3333)WS(0.3333)GEER;
GAESPFEEK	GAES[79.9663]PFEEK	R	S	1424	1432	9	2	4S(79.9663)	sp|P46821|MAP1B_HUMAN	P46821	MAP1B_HUMAN	MAP1B	Microtubule-associated protein 1B			1	1.00674e+06	MS/MS	STY:79.9663@GAES(1.0000)PFEEK;
GAGATSGSPPAGRN	GAGAT[79.9663]SGSPPAGRN	K	-	194	207	14	2	5T(79.9663)	sp|P16455|MGMT_HUMAN	P16455	MGMT_HUMAN	MGMT	Methylated-DNA--protein-cysteine methyltransferase			1	1558712	MS/MS	STY:79.9663@GAGAT(0.3333)S(0.3333)GS(0.3333)PPAGRN;
GAGDGSDEEVDGK	GAGDGS[79.9663]DEEVDGK	K	A	1938	1950	13	2	6S(79.9663)	sp|P35579|MYH9_HUMAN	P35579	MYH9_HUMAN	MYH9	Myosin-9		sp|P35579-2|MYH9_HUMAN	9	5.7194412E7	MS/MS	STY:79.9663@GAGDGS(1.0000)DEEVDGK;
GAGDGSDEEVDGKADGAEAK	GAGDGS[79.9663]DEEVDGKADGAEAK	K	P	1938	1957	20	2	6S(79.9663)	sp|P35579|MYH9_HUMAN	P35579	MYH9_HUMAN	MYH9	Myosin-9		sp|P35579-2|MYH9_HUMAN	2	0	MS/MS	STY:79.9663@GAGDGS(1.0000)DEEVDGKADGAEAK;
GAPSSPATGVLPSPQGK	GAPS[79.9663]SPATGVLPSPQGK	R	S	1594	1610	17	2	4S(79.9663)	sp|Q5SRE5-2|NU188_HUMAN	Q5SRE5-2	NU188_HUMAN	NUP188	Isoform 2 of Nucleoporin NUP188		sp|Q5SRE5|NU188_HUMAN	2	1855307	MS/MS	STY:79.9663@GAPS(0.3298)S(0.3298)PAT(0.3298)GVLPS(0.0106)PQGK;
GARPPAAGPGGDEDEDEEDTAPESALDTSLDK	GARPPAAGPGGDEDEDEEDTAPES[79.9663]ALDT[79.9663]S[79.9663]LDK	R	S	1160	1191	32	3	24S(79.9663),28T(79.9663),29S(79.9663)	sp|Q27J81-2|INF2_HUMAN	Q27J81-2	INF2_HUMAN	INF2	Isoform 2 of Inverted formin-2		sp|Q27J81|INF2_HUMAN	1	4.85161e+06	MS/MS	STY:79.9663@GARPPAAGPGGDEDEDEEDT(0.3513)APES(0.8829)ALDT(0.8829)S(0.8829)LDK;
GARPPAAGPGGDEDEDEEDTAPESALDTSLDK	GARPPAAGPGGDEDEDEEDT[79.9663]APESALDT[79.9663]SLDK	R	S	1160	1191	32	3	20T(79.9663),28T(79.9663)	sp|Q27J81-2|INF2_HUMAN	Q27J81-2	INF2_HUMAN	INF2	Isoform 2 of Inverted formin-2		sp|Q27J81|INF2_HUMAN	1	3.82565e+06	MS/MS	STY:79.9663@GARPPAAGPGGDEDEDEEDT(0.5595)APES(0.3864)ALDT(0.5271)S(0.5271)LDK;
GARPPAAGPGGDEDEDEEDTAPESALDTSLDK	GARPPAAGPGGDEDEDEEDT[79.9663]APES[79.9663]ALDTSLDK	R	S	1160	1191	32	3	20T(79.9663),24S(79.9663)	sp|Q27J81-2|INF2_HUMAN	Q27J81-2	INF2_HUMAN	INF2	Isoform 2 of Inverted formin-2		sp|Q27J81|INF2_HUMAN	1	3.78931e+06	MS/MS	STY:79.9663@GARPPAAGPGGDEDEDEEDT(0.5000)APES(0.5000)ALDT(0.5000)S(0.5000)LDK;
GAVENEEDLPELSDSGDEAAWEDEDDADLPHGK	GAVENEEDLPELS[79.9663]DS[79.9663]GDEAAWEDEDDADLPHGK	R	Q	13	45	33	3,4	13S(79.9663),15S(79.9663)	sp|O60678|ANM3_HUMAN	O60678	ANM3_HUMAN	PRMT3	Protein arginine N-methyltransferase 3			6	8.9248688E7	MS/MS	STY:79.9663@GAVENEEDLPELS(1.0000)DS(1.0000)GDEAAWEDEDDADLPHGK;
GDDDEESDEEAVK	GDDDEES[79.9663]DEEAVK	K	K	613	625	13	2	7S(79.9663)	sp|O43395|PRPF3_HUMAN	O43395	PRPF3_HUMAN	PRPF3	U4/U6 small nuclear ribonucleoprotein Prp3			2	4.26104e+06	MS/MS	STY:79.9663@GDDDEES(1.0000)DEEAVK;
GDDDEESDEEAVKK	GDDDEES[79.9663]DEEAVKK	K	T	613	626	14	2	7S(79.9663)	sp|O43395|PRPF3_HUMAN	O43395	PRPF3_HUMAN	PRPF3	U4/U6 small nuclear ribonucleoprotein Prp3			2	2.35283e+06	MS/MS	STY:79.9663@GDDDEES(1.0000)DEEAVKK;
GDEEGLGGEEEEEEEEEEEDDSAEEGGAAR	GDEEGLGGEEEEEEEEEEEDDS[79.9663]AEEGGAAR	R	L	542	571	30	3	22S(79.9663)	sp|Q9Y2K7-2|KDM2A_HUMAN	Q9Y2K7-2	KDM2A_HUMAN	KDM2A	Isoform 2 of Lysine-specific demethylase 2A		sp|Q9Y2K7-4|KDM2A_HUMAN, sp|Q9Y2K7-5|KDM2A_HUMAN, sp|Q9Y2K7|KDM2A_HUMAN	2	1.99935e+06	MS/MS	STY:79.9663@GDEEGLGGEEEEEEEEEEEDDS(1.0000)AEEGGAAR;
GDGRPETPK	GDGRPET[79.9663]PK	K	Q	729	737	9	2	7T(79.9663)	sp|Q6KC79-2|NIPBL_HUMAN	Q6KC79-2	NIPBL_HUMAN	NIPBL	Isoform 2 of Nipped-B-like protein		sp|Q6KC79-3|NIPBL_HUMAN, sp|Q6KC79|NIPBL_HUMAN	1	0	MS/MS	STY:79.9663@GDGRPET(1.0000)PK;
GDRSPEPGQTWTR	GDRS[79.9663]PEPGQTWTR	K	E	90	102	13	2	4S(79.9663)	sp|Q09666|AHNK_HUMAN	Q09666	AHNK_HUMAN	AHNAK	Neuroblast differentiation-associated protein AHNAK		sp|Q09666-2|AHNK_HUMAN	2	3.04732e+06	MS/MS	STY:79.9663@GDRS(0.8664)PEPGQT(0.0668)WT(0.0668)R;
GDSESEEDEDLEVPVPSR	GDS[79.9663]ESEEDEDLEVPVPS[79.9663]R	K	F	76	93	18	2	17S(79.9663),3S(79.9663)	sp|P13861-2|KAP2_HUMAN	P13861-2	KAP2_HUMAN	PRKAR2A	Isoform 2 of cAMP-dependent protein kinase type II-alpha regulatory subunit		sp|P13861|KAP2_HUMAN	4	0	MS/MS	STY:79.9663@GDS(0.6580)ES(0.6580)EEDEDLEVPVPS(0.6840)R;
GDSESEEDEDLEVPVPSR	GDS[79.9663]ES[79.9663]EEDEDLEVPVPSR	K	F	76	93	18	2,3	3S(79.9663),5S(79.9663)	sp|P13861-2|KAP2_HUMAN	P13861-2	KAP2_HUMAN	PRKAR2A	Isoform 2 of cAMP-dependent protein kinase type II-alpha regulatory subunit		sp|P13861|KAP2_HUMAN	24	1.46548384E8	MS/MS	STY:79.9663@GDS(0.9481)ES(0.9481)EEDEDLEVPVPS(0.1038)R;
GDSIEEILADSEDEEDNEEEER	GDS[79.9663]IEEILADSEDEEDNEEEER	K	S	970	991	22	3	3S(79.9663)	sp|Q5JTH9-2|RRP12_HUMAN	Q5JTH9-2	RRP12_HUMAN	RRP12	Isoform 2 of RRP12-like protein		sp|Q5JTH9-3|RRP12_HUMAN, sp|Q5JTH9|RRP12_HUMAN	3	0	MS/MS	STY:79.9663@GDS(0.8584)IEEILADS(0.1416)EDEEDNEEEER;
GDVTAEEAAGASPAK	GDVTAEEAAGAS[79.9663]PAK	R	A	11	25	15	2	12S(79.9663)	sp|P49006|MRP_HUMAN	P49006	MRP_HUMAN	MARCKSL1	MARCKS-related protein			1	3.48065e+06	MS/MS	STY:79.9663@GDVT(0.0751)AEEAAGAS(0.9249)PAK;
GDVTAEEAAGASPAK	GDVT[79.9663]AEEAAGASPAK	R	A	11	25	15	2	4T(79.9663)	sp|P49006|MRP_HUMAN	P49006	MRP_HUMAN	MARCKSL1	MARCKS-related protein			2	3.48065e+06	MS/MS	STY:79.9663@GDVT(0.7733)AEEAAGAS(0.2267)PAK;
GEAAAERPGEAAVASSPSK	GEAAAERPGEAAVASSPS[79.9663]K	K	A	12	30	19	2	18S(79.9663)	sp|P29966|MARCS_HUMAN	P29966	MARCS_HUMAN	MARCKS	Myristoylated alanine-rich C-kinase substrate			1	1.1312986E7	MS/MS	STY:79.9663@GEAAAERPGEAAVAS(0.0471)S(0.2420)PS(0.7109)K;
GEAAAERPGEAAVASSPSK	GEAAAERPGEAAVASS[79.9663]PSK	K	A	12	30	19	3	16S(79.9663)	sp|P29966|MARCS_HUMAN	P29966	MARCS_HUMAN	MARCKS	Myristoylated alanine-rich C-kinase substrate			1	4926146	MS/MS	STY:79.9663@GEAAAERPGEAAVAS(0.0905)S(0.4547)PS(0.4547)K;
GEAAAERPGEAAVASSPSK	GEAAAERPGEAAVAS[79.9663]SPSK	K	A	12	30	19	2,3	15S(79.9663)	sp|P29966|MARCS_HUMAN	P29966	MARCS_HUMAN	MARCKS	Myristoylated alanine-rich C-kinase substrate			3	1.6239132E7	MS/MS	STY:79.9663@GEAAAERPGEAAVAS(0.4912)S(0.4912)PS(0.0176)K;
GEAEQSEEEADEEDK	GEAEQS[79.9663]EEEADEEDK	K	A	1011	1025	15	2	6S(79.9663)	sp|P46821|MAP1B_HUMAN	P46821	MAP1B_HUMAN	MAP1B	Microtubule-associated protein 1B			3	0	MS/MS	STY:79.9663@GEAEQS(1.0000)EEEADEEDK;
GEAEQSEEEADEEDKAEDAREEEYEPEK	GEAEQS[79.9663]EEEADEEDKAEDAREEEYEPEK	K	M	1011	1038	28	3	6S(79.9663)	sp|P46821|MAP1B_HUMAN	P46821	MAP1B_HUMAN	MAP1B	Microtubule-associated protein 1B			1	4626462	MS/MS	STY:79.9663@GEAEQS(0.5000)EEEADEEDKAEDAREEEY(0.5000)EPEK;
GEDSAEETEAK	GEDSAEET[79.9663]EAK	K	P	479	489	11	2	8T(79.9663)	sp|Q12906-7|ILF3_HUMAN	Q12906-7	ILF3_HUMAN	ILF3	Isoform 7 of Interleukin enhancer-binding factor 3		sp|Q12906-2|ILF3_HUMAN, sp|Q12906-3|ILF3_HUMAN, sp|Q12906-4|ILF3_HUMAN, sp|Q12906-5|ILF3_HUMAN, sp|Q12906-6|ILF3_HUMAN, sp|Q12906|ILF3_HUMAN	1	2.1922634E7	MS/MS	STY:79.9663@GEDS(0.0847)AEET(0.9153)EAK;
GEDSAEETEAK	GEDS[79.9663]AEETEAK	K	P	479	489	11	2	4S(79.9663)	sp|Q12906-7|ILF3_HUMAN	Q12906-7	ILF3_HUMAN	ILF3	Isoform 7 of Interleukin enhancer-binding factor 3		sp|Q12906-2|ILF3_HUMAN, sp|Q12906-3|ILF3_HUMAN, sp|Q12906-4|ILF3_HUMAN, sp|Q12906-5|ILF3_HUMAN, sp|Q12906-6|ILF3_HUMAN, sp|Q12906|ILF3_HUMAN	2	2.1922634E7	MS/MS	STY:79.9663@GEDS(0.5000)AEET(0.5000)EAK;
GEEGSDDDETENGPK	GEEGS[79.9663]DDDETENGPK	K	P	966	980	15	2	5S(79.9663)	sp|Q6PD62|CTR9_HUMAN	Q6PD62	CTR9_HUMAN	CTR9	RNA polymerase-associated protein CTR9 homolog			1	1.96513e+06	MS/MS	STY:79.9663@GEEGS(0.9291)DDDET(0.0709)ENGPK;
GEEGSDDDETENGPKPK	GEEGS[79.9663]DDDETENGPKPK	K	K	966	982	17	2	5S(79.9663)	sp|Q6PD62|CTR9_HUMAN	Q6PD62	CTR9_HUMAN	CTR9	RNA polymerase-associated protein CTR9 homolog			2	4232884	MS/MS	STY:79.9663@GEEGS(0.5000)DDDET(0.5000)ENGPKPK;
GEFSASPMLK	GEFSAS[79.9663]PM[15.9949]LK	R	S	1119	1128	10	2	6S(79.9663),8M(15.9949)	sp|Q9UQ35|SRRM2_HUMAN	Q9UQ35	SRRM2_HUMAN	SRRM2	Serine/arginine repetitive matrix protein 2		sp|Q9UQ35-2|SRRM2_HUMAN	1	902050	MS/MS	STY:79.9663@GEFS(0.1588)AS(0.8412)PMLK;M:15.9949@GEFSASPM(1.0000)LK;
GEFSASPMLK	GEFS[79.9663]ASPMLK	R	S	1119	1128	10	2	4S(79.9663)	sp|Q9UQ35|SRRM2_HUMAN	Q9UQ35	SRRM2_HUMAN	SRRM2	Serine/arginine repetitive matrix protein 2		sp|Q9UQ35-2|SRRM2_HUMAN	1	1.91673e+06	MS/MS	STY:79.9663@GEFS(0.5000)AS(0.5000)PMLK;
GEFSASPMLK	GEFS[79.9663]ASPM[15.9949]LK	R	S	1119	1128	10	2	4S(79.9663),8M(15.9949)	sp|Q9UQ35|SRRM2_HUMAN	Q9UQ35	SRRM2_HUMAN	SRRM2	Serine/arginine repetitive matrix protein 2		sp|Q9UQ35-2|SRRM2_HUMAN	1	902050	MS/MS	STY:79.9663@GEFS(0.5000)AS(0.5000)PMLK;M:15.9949@GEFSASPM(1.0000)LK;
GEGDAPFSEPGTTSTQRPSSPETATK	GEGDAPFSEPGTTSTQRPSSPET[79.9663]ATK	R	Q	304	329	26	3	23T(79.9663)	sp|Q9UQ35|SRRM2_HUMAN	Q9UQ35	SRRM2_HUMAN	SRRM2	Serine/arginine repetitive matrix protein 2		sp|Q9UQ35-2|SRRM2_HUMAN, sp|Q9UQ35-3|SRRM2_HUMAN	2	2.3433012E7	MS/MS	STY:79.9663@GEGDAPFS(0.0114)EPGT(0.0193)T(0.0193)S(0.0769)T(0.0769)QRPS(0.0769)S(0.0769)PET(0.6089)AT(0.0338)K;
GEGDAPFSEPGTTSTQRPSSPETATK	GEGDAPFSEPGTTST[79.9663]QRPSSPETATK	R	Q	304	329	26	3	15T(79.9663)	sp|Q9UQ35|SRRM2_HUMAN	Q9UQ35	SRRM2_HUMAN	SRRM2	Serine/arginine repetitive matrix protein 2		sp|Q9UQ35-2|SRRM2_HUMAN, sp|Q9UQ35-3|SRRM2_HUMAN	1	8310931	MS/MS	STY:79.9663@GEGDAPFS(0.0250)EPGT(0.0250)T(0.0250)S(0.0250)T(0.7485)QRPS(0.0654)S(0.0654)PET(0.0103)AT(0.0103)K;
GEGDAPFSEPGTTSTQRPSSPETATK	GEGDAPFSEPGTTS[79.9663]TQRPSSPETATK	R	Q	304	329	26	3	14S(79.9663)	sp|Q9UQ35|SRRM2_HUMAN	Q9UQ35	SRRM2_HUMAN	SRRM2	Serine/arginine repetitive matrix protein 2		sp|Q9UQ35-2|SRRM2_HUMAN, sp|Q9UQ35-3|SRRM2_HUMAN	1	1.512208E7	MS/MS	STY:79.9663@GEGDAPFS(0.0413)EPGT(0.0413)T(0.0413)S(0.2297)T(0.2297)QRPS(0.2038)S(0.2038)PET(0.0039)AT(0.0051)K;
GEGDAPFSEPGTTSTQRPSSPETATK	GEGDAPFSEPGT[79.9663]TSTQRPSSPETATK	R	Q	304	329	26	3	12T(79.9663)	sp|Q9UQ35|SRRM2_HUMAN	Q9UQ35	SRRM2_HUMAN	SRRM2	Serine/arginine repetitive matrix protein 2		sp|Q9UQ35-2|SRRM2_HUMAN, sp|Q9UQ35-3|SRRM2_HUMAN	1	1.512208E7	MS/MS	STY:79.9663@GEGDAPFS(0.0151)EPGT(0.1399)T(0.1399)S(0.1399)T(0.1399)QRPS(0.1399)S(0.1399)PET(0.1399)AT(0.0056)K;
GEGDAPFSEPGTTSTQRPSSPETATK	GEGDAPFSEPGT[79.9663]T[79.9663]STQRPSSPETATK	R	Q	304	329	26	3	12T(79.9663),13T(79.9663)	sp|Q9UQ35|SRRM2_HUMAN	Q9UQ35	SRRM2_HUMAN	SRRM2	Serine/arginine repetitive matrix protein 2		sp|Q9UQ35-2|SRRM2_HUMAN, sp|Q9UQ35-3|SRRM2_HUMAN	2	6.29616e+06	MS/MS	STY:79.9663@GEGDAPFS(0.0135)EPGT(0.3829)T(0.3829)S(0.3829)T(0.3829)QRPS(0.3829)S(0.0498)PET(0.0111)AT(0.0111)K;
GEGDAPFSEPGTTSTQRPSSPETATK	GEGDAPFS[79.9663]EPGT[79.9663]TSTQRPSSPETATK	R	Q	304	329	26	3	12T(79.9663),8S(79.9663)	sp|Q9UQ35|SRRM2_HUMAN	Q9UQ35	SRRM2_HUMAN	SRRM2	Serine/arginine repetitive matrix protein 2		sp|Q9UQ35-2|SRRM2_HUMAN, sp|Q9UQ35-3|SRRM2_HUMAN	1	3794454	MS/MS	STY:79.9663@GEGDAPFS(0.2222)EPGT(0.2222)T(0.2222)S(0.2222)T(0.2222)QRPS(0.2222)S(0.2222)PET(0.2222)AT(0.2222)K;
GEPAAAAAPEAGASPVEK	GEPAAAAAPEAGAS[79.9663]PVEK	K	E	88	105	18	2,3	14S(79.9663)	sp|P29966|MARCS_HUMAN	P29966	MARCS_HUMAN	MARCKS	Myristoylated alanine-rich C-kinase substrate			7	5947967	MS/MS	STY:79.9663@GEPAAAAAPEAGAS(1.0000)PVEK;
GEQVSQNGLPAEQGSPR	GEQVSQNGLPAEQGS[79.9663]PR	K	M	2124	2140	17	2	15S(79.9663)	sp|Q01082|SPTB2_HUMAN	Q01082	SPTB2_HUMAN	SPTBN1	Spectrin beta chain, non-erythrocytic 1		sp|Q01082-2|SPTB2_HUMAN, sp|Q01082-3|SPTB2_HUMAN	3	6291563	MS/MS	STY:79.9663@GEQVS(0.0798)QNGLPAEQGS(0.9202)PR;
GEVPPKETPK	GEVPPKET[79.9663]PK	K	K	78	87	10	2	8T(79.9663)	sp|P49006|MRP_HUMAN	P49006	MRP_HUMAN	MARCKSL1	MARCKS-related protein			1	891028	MS/MS	STY:79.9663@GEVPPKET(1.0000)PK;
GFEEEHKDSDDDSSDDEQEK	GFEEEHKDS[79.9663]DDDS[79.9663]S[79.9663]DDEQEK	K	K	423	442	20	3	13S(79.9663),14S(79.9663),9S(79.9663)	sp|Q13435|SF3B2_HUMAN	Q13435	SF3B2_HUMAN	SF3B2	Splicing factor 3B subunit 2			24	1.1989284E8	MS/MS	STY:79.9663@GFEEEHKDS(1.0000)DDDS(1.0000)S(1.0000)DDEQEK;
GFGDGYNGYGGGPGGGNFGGSPGYGGGR	GFGDGYNGYGGGPGGGNFGGS[79.9663]PGYGGGR	R	G	227	254	28	3	21S(79.9663)	sp|P22626-2|ROA2_HUMAN	P22626-2	ROA2_HUMAN	HNRNPA2B1	Isoform A2 of Heterogeneous nuclear ribonucleoproteins A2/B1		sp|P22626|ROA2_HUMAN	1	2.76707e+06	MS/MS	STY:79.9663@GFGDGY(0.0251)NGY(0.0208)GGGPGGGNFGGS(0.4771)PGY(0.4771)GGGR;
GFGDGYNGYGGGPGGGNFGGSPGYGGGR	GFGDGYNGY[79.9663]GGGPGGGNFGGSPGYGGGR	R	G	227	254	28	3	9Y(79.9663)	sp|P22626-2|ROA2_HUMAN	P22626-2	ROA2_HUMAN	HNRNPA2B1	Isoform A2 of Heterogeneous nuclear ribonucleoproteins A2/B1		sp|P22626|ROA2_HUMAN	1	0	MS/MS	STY:79.9663@GFGDGY(0.0406)NGY(0.3198)GGGPGGGNFGGS(0.3198)PGY(0.3198)GGGR;
GFGDGYNGYGGGPGGGNFGGSPGYGGGR	GFGDGY[79.9663]NGYGGGPGGGNFGGSPGYGGGR	R	G	227	254	28	3	6Y(79.9663)	sp|P22626-2|ROA2_HUMAN	P22626-2	ROA2_HUMAN	HNRNPA2B1	Isoform A2 of Heterogeneous nuclear ribonucleoproteins A2/B1		sp|P22626|ROA2_HUMAN	2	2.76707e+06	MS/MS	STY:79.9663@GFGDGY(0.9188)NGY(0.0334)GGGPGGGNFGGS(0.0239)PGY(0.0239)GGGR;
GFGFGQGAGALVHSE	GFGFGQGAGALVHS[79.9663]E	K	-	179	193	15	2	14S(79.9663)	sp|P21291|CSRP1_HUMAN	P21291	CSRP1_HUMAN	CSRP1	Cysteine and glycine-rich protein 1			4	3.81762e+06	MS/MS	STY:79.9663@GFGFGQGAGALVHS(1.0000)E;
GFGSEEGSR	GFGS[79.9663]EEGSR	R	A	39	47	9	2	4S(79.9663)	sp|Q9Y5S9|RBM8A_HUMAN	Q9Y5S9	RBM8A_HUMAN	RBM8A	RNA-binding protein 8A			2	664078	MS/MS	STY:79.9663@GFGS(0.6255)EEGS(0.3745)R;
GFINDDDDEDEGEEDEGSDSGDSEDDVGHK	GFINDDDDEDEGEEDEGS[79.9663]DS[79.9663]GDS[79.9663]EDDVGHK	K	K	56	85	30	3	18S(79.9663),20S(79.9663),23S(79.9663)	sp|Q7KZ85-3|SPT6H_HUMAN	Q7KZ85-3	SPT6H_HUMAN	SUPT6H	Isoform 3 of Transcription elongation factor SPT6		sp|Q7KZ85|SPT6H_HUMAN	6	2.3300514E7	MS/MS	STY:79.9663@GFINDDDDEDEGEEDEGS(1.0000)DS(1.0000)GDS(1.0000)EDDVGHK;
GGAPDPSPGATATPGAPAQPSSPDAR	GGAPDPS[79.9663]PGATATPGAPAQPSSPDAR	R	R	505	530	26	3	7S(79.9663)	sp|O95365|ZBT7A_HUMAN	O95365	ZBT7A_HUMAN	ZBTB7A	Zinc finger and BTB domain-containing protein 7A			1	3.37575e+06	MS/MS	STY:79.9663@GGAPDPS(0.2608)PGAT(0.2608)AT(0.2608)PGAPAQPS(0.1087)S(0.1087)PDAR;
GGDDHDDTSDSDSDGLTLK	GGDDHDDTSDS[79.9663]DS[79.9663]DGLTLK	K	E	144	162	19	2	11S(79.9663),13S(79.9663)	sp|Q9BTC0|DIDO1_HUMAN	Q9BTC0	DIDO1_HUMAN	DIDO1	Death-inducer obliterator 1		sp|Q9BTC0-1|DIDO1_HUMAN, sp|Q9BTC0-2|DIDO1_HUMAN, sp|Q9BTC0-3|DIDO1_HUMAN	1	0	MS/MS	STY:79.9663@GGDDHDDT(0.0969)S(0.0969)DS(0.8657)DS(0.8657)DGLT(0.0748)LK;
GGDDHDDTSDSDSDGLTLK	GGDDHDDT[79.9663]S[79.9663]DS[79.9663]DSDGLTLK	K	E	144	162	19	2	11S(79.9663),8T(79.9663),9S(79.9663)	sp|Q9BTC0|DIDO1_HUMAN	Q9BTC0	DIDO1_HUMAN	DIDO1	Death-inducer obliterator 1		sp|Q9BTC0-1|DIDO1_HUMAN, sp|Q9BTC0-2|DIDO1_HUMAN, sp|Q9BTC0-3|DIDO1_HUMAN	7	1.297188E7	MS/MS	STY:79.9663@GGDDHDDT(0.6491)S(0.6491)DS(0.6491)DS(0.6491)DGLT(0.4038)LK;
GGGSGGGEESEGEEVDED	GGGSGGGEES[79.9663]EGEEVDED	R	-	295	312	18	2	10S(79.9663)	sp|Q96QR8|PURB_HUMAN	Q96QR8	PURB_HUMAN	PURB	Transcriptional activator protein Pur-beta			1	3.91674e+06	MS/MS	STY:79.9663@GGGS(0.2072)GGGEES(0.7928)EGEEVDED;
GGGSGGGEESEGEEVDED	GGGS[79.9663]GGGEESEGEEVDED	R	-	295	312	18	2	4S(79.9663)	sp|Q96QR8|PURB_HUMAN	Q96QR8	PURB_HUMAN	PURB	Transcriptional activator protein Pur-beta			1	3.91674e+06	MS/MS	STY:79.9663@GGGS(0.5000)GGGEES(0.5000)EGEEVDED;
GGGTPDANSLAPPGK	GGGT[79.9663]PDANSLAPPGK	R	A	299	313	15	2	4T(79.9663)	sp|Q9BRQ0|PYGO2_HUMAN	Q9BRQ0	PYGO2_HUMAN	PYGO2	Pygopus homolog 2			1	1.13076e+06	MS/MS	STY:79.9663@GGGT(0.5000)PDANS(0.5000)LAPPGK;
GGLSPANDTGAK	GGLS[79.9663]PANDTGAK	R	K	44	55	12	2	4S(79.9663)	sp|P30419|NMT1_HUMAN	P30419	NMT1_HUMAN	NMT1	Glycylpeptide N-tetradecanoyltransferase 1			3	1.131093E7	MS/MS	STY:79.9663@GGLS(0.9443)PANDT(0.0557)GAK;
GGNVFAALIQDQSEEEEEEEK	GGNVFAALIQDQS[79.9663]EEEEEEEK	K	H	128	148	21	3	13S(79.9663)	sp|Q8NE71|ABCF1_HUMAN	Q8NE71	ABCF1_HUMAN	ABCF1	ATP-binding cassette sub-family F member 1		sp|Q8NE71-2|ABCF1_HUMAN	1	0	MS/MS	STY:79.9663@GGNVFAALIQDQS(1.0000)EEEEEEEK;
GGSISVQVNSIKFDSE	GGSISVQVNSIKFDS[79.9663]E	R	-	694	709	16	2	15S(79.9663)	sp|Q14978-2|NOLC1_HUMAN	Q14978-2	NOLC1_HUMAN	NOLC1	Isoform Beta of Nucleolar and coiled-body phosphoprotein 1		sp|Q14978-3|NOLC1_HUMAN, sp|Q14978|NOLC1_HUMAN	1	1.511945E7	MS/MS	STY:79.9663@GGS(0.0372)IS(0.0372)VQVNS(0.0467)IKFDS(0.8789)E;
GGSISVQVNSIKFDSE	GGSISVQVNS[79.9663]IKFDSE	R	-	694	709	16	2	10S(79.9663)	sp|Q14978-2|NOLC1_HUMAN	Q14978-2	NOLC1_HUMAN	NOLC1	Isoform Beta of Nucleolar and coiled-body phosphoprotein 1		sp|Q14978-3|NOLC1_HUMAN, sp|Q14978|NOLC1_HUMAN	2	1.511945E7	MS/MS	STY:79.9663@GGS(0.0150)IS(0.0204)VQVNS(0.4823)IKFDS(0.4823)E;
GGVTGSPEASISGSK	GGVTGS[79.9663]PEASISGSK	K	G	5726	5740	15	2	6S(79.9663)	sp|Q09666|AHNK_HUMAN	Q09666	AHNK_HUMAN	AHNAK	Neuroblast differentiation-associated protein AHNAK			2	1.2913051E7	MS/MS	STY:79.9663@GGVT(0.0218)GS(0.4461)PEAS(0.1774)IS(0.1774)GS(0.1774)K;
GGVTGSPEASISGSK	GGVT[79.9663]GSPEASISGSK	K	G	5726	5740	15	2	4T(79.9663)	sp|Q09666|AHNK_HUMAN	Q09666	AHNK_HUMAN	AHNAK	Neuroblast differentiation-associated protein AHNAK			5	1.2913051E7	MS/MS	STY:79.9663@GGVT(0.4813)GS(0.4813)PEAS(0.0125)IS(0.0125)GS(0.0125)K;
GHDDDVSSTSEDDGYPEDMDQDK	GHDDDVSS[79.9663]T[79.9663]S[79.9663]EDDGYPEDMDQDK	R	H	244	266	23	3	10S(79.9663),8S(79.9663),9T(79.9663)	sp|Q9Y2W2|WBP11_HUMAN	Q9Y2W2	WBP11_HUMAN	WBP11	WW domain-binding protein 11			1	1.4258558E7	MS/MS	STY:79.9663@GHDDDVS(0.2197)S(0.6951)T(0.6951)S(0.6951)EDDGY(0.6951)PEDMDQDK;
GHDDDVSSTSEDDGYPEDMDQDK	GHDDDVS[79.9663]STS[79.9663]EDDGY[79.9663]PEDMDQDK	R	H	244	266	23	3	10S(79.9663),15Y(79.9663),7S(79.9663)	sp|Q9Y2W2|WBP11_HUMAN	Q9Y2W2	WBP11_HUMAN	WBP11	WW domain-binding protein 11			2	0	MS/MS	STY:79.9663@GHDDDVS(0.5873)S(0.5873)T(0.5873)S(0.6189)EDDGY(0.6191)PEDMDQDK;
GHDDDVSSTSEDDGYPEDMDQDK	GHDDDVS[79.9663]S[79.9663]TSEDDGY[79.9663]PEDMDQDK	R	H	244	266	23	3	15Y(79.9663),7S(79.9663),8S(79.9663)	sp|Q9Y2W2|WBP11_HUMAN	Q9Y2W2	WBP11_HUMAN	WBP11	WW domain-binding protein 11			1	1.4050878E7	MS/MS	STY:79.9663@GHDDDVS(0.5940)S(0.5940)T(0.5940)S(0.5940)EDDGY(0.6241)PEDMDQDK;
GHDDDVSSTSEDDGYPEDMDQDK	GHDDDVS[79.9663]S[79.9663]T[79.9663]SEDDGYPEDMDQDK	R	H	244	266	23	3	7S(79.9663),8S(79.9663),9T(79.9663)	sp|Q9Y2W2|WBP11_HUMAN	Q9Y2W2	WBP11_HUMAN	WBP11	WW domain-binding protein 11			5	1.4218356E7	MS/MS	STY:79.9663@GHDDDVS(0.7012)S(0.7012)T(0.7012)S(0.7012)EDDGY(0.1952)PEDMDQDK;
GHHVTDSENDEPLNLNASDSESEELHR	GHHVT[79.9663]DS[79.9663]ENDEPLNLNAS[79.9663]DSESEELHR	K	Q	63	89	27	3	18S(79.9663),5T(79.9663),7S(79.9663)	sp|Q96ST2|IWS1_HUMAN	Q96ST2	IWS1_HUMAN	IWS1	Protein IWS1 homolog			2	0	MS/MS	STY:79.9663@GHHVT(0.5946)DS(0.5946)ENDEPLNLNAS(0.6215)DS(0.5946)ES(0.5946)EELHR;
GHYEVTGSDDETGK	GHYEVTGSDDET[79.9663]GK	K	L	5834	5847	14	2	12T(79.9663)	sp|Q09666|AHNK_HUMAN	Q09666	AHNK_HUMAN	AHNAK	Neuroblast differentiation-associated protein AHNAK			2	1.4875087E7	MS/MS	STY:79.9663@GHY(0.0409)EVT(0.1224)GS(0.1224)DDET(0.7142)GK;
GHYEVTGSDDETGK	GHYEVTGS[79.9663]DDETGK	K	L	5834	5847	14	2	8S(79.9663)	sp|Q09666|AHNK_HUMAN	Q09666	AHNK_HUMAN	AHNAK	Neuroblast differentiation-associated protein AHNAK			2	1.5008317E7	MS/MS	STY:79.9663@GHY(0.0478)EVT(0.0478)GS(0.8757)DDET(0.0287)GK;
GHYEVTGSDDETGK	GHYEVT[79.9663]GSDDETGK	K	L	5834	5847	14	2	6T(79.9663)	sp|Q09666|AHNK_HUMAN	Q09666	AHNK_HUMAN	AHNAK	Neuroblast differentiation-associated protein AHNAK			2	1.4896977E7	MS/MS	STY:79.9663@GHY(0.0175)EVT(0.7235)GS(0.0372)DDET(0.2218)GK;
GHYEVTGSDDETGK	GHY[79.9663]EVTGSDDETGK	K	L	5834	5847	14	2,3	3Y(79.9663)	sp|Q09666|AHNK_HUMAN	Q09666	AHNK_HUMAN	AHNAK	Neuroblast differentiation-associated protein AHNAK			4	1.7840522E7	MS/MS	STY:79.9663@GHY(0.4087)EVT(0.4087)GS(0.0913)DDET(0.0913)GK;
GIPLATGDTSPEPELLPGAPLPPPK	GIPLAT[79.9663]GDTSPEPELLPGAPLPPPK	K	E	33	57	25	3	6T(79.9663)	sp|O75821|EIF3G_HUMAN	O75821	EIF3G_HUMAN	EIF3G	Eukaryotic translation initiation factor 3 subunit G			1	2.77742e+06	MS/MS	STY:79.9663@GIPLAT(0.3333)GDT(0.3333)S(0.3333)PEPELLPGAPLPPPK;
GISPIVFDR	GIS[79.9663]PIVFDR	R	S	306	314	9	2	3S(79.9663)	sp|Q96MU7-2|YTDC1_HUMAN	Q96MU7-2	YTDC1_HUMAN	YTHDC1	Isoform 2 of YTH domain-containing protein 1		sp|Q96MU7|YTDC1_HUMAN	1	0	MS/MS	STY:79.9663@GIS(1.0000)PIVFDR;
GKLPESPK	GKLPES[79.9663]PK	R	R	442	449	8	2	6S(79.9663)	sp|P17480-2|UBF1_HUMAN	P17480-2	UBF1_HUMAN	UBTF	Isoform UBF2 of Nucleolar transcription factor 1		sp|P17480|UBF1_HUMAN	1	1.23468e+06	MS/MS	STY:79.9663@GKLPES(1.0000)PK;
GKLSAEENPDDSEVPSSSGINSTK	GKLS[79.9663]AEENPDDSEVPSSSGINSTK	K	S	40	63	24	3	4S(79.9663)	sp|Q9Y5Q9-2|TF3C3_HUMAN	Q9Y5Q9-2	TF3C3_HUMAN	GTF3C3	Isoform 2 of General transcription factor 3C polypeptide 3		sp|Q9Y5Q9|TF3C3_HUMAN	2	2303611	MS/MS	STY:79.9663@GKLS(0.5789)AEENPDDS(0.0702)EVPS(0.0702)S(0.0702)S(0.0702)GINS(0.0702)T(0.0702)K;
GKTPEEIRK	GKT[79.9663]PEEIRK	K	T	129	137	9	3	3T(79.9663)	sp|P63208|SKP1_HUMAN	P63208	SKP1_HUMAN	SKP1	S-phase kinase-associated protein 1		sp|P63208-2|SKP1_HUMAN	1	3.45103e+06	MS/MS	STY:79.9663@GKT(1.0000)PEEIRK;
GLAAEDSGGDSK	GLAAEDS[79.9663]GGDSK	K	D	184	195	12	2	7S(79.9663)	sp|P41227-2|NAA10_HUMAN	P41227-2	NAA10_HUMAN	NAA10	Isoform 2 of N-alpha-acetyltransferase 10		sp|P41227|NAA10_HUMAN	1	0	MS/MS	STY:79.9663@GLAAEDS(0.5000)GGDS(0.5000)K;
GLAEVQQDGEAEEGATSDGEK	GLAEVQQDGEAEEGAT[79.9663]SDGEK	K	K	484	504	21	2	16T(79.9663)	sp|Q02952-2|AKA12_HUMAN	Q02952-2	AKA12_HUMAN	AKAP12	Isoform 2 of A-kinase anchor protein 12		sp|Q02952-3|AKA12_HUMAN, sp|Q02952|AKA12_HUMAN	1	0	MS/MS	STY:79.9663@GLAEVQQDGEAEEGAT(0.5000)S(0.5000)DGEK;
GLAGPPASPGK	GLAGPPAS[79.9663]PGK	K	A	597	607	11	2	8S(79.9663)	sp|Q9P206-2|K1522_HUMAN	Q9P206-2	K1522_HUMAN	KIAA1522	Isoform 2 of Uncharacterized protein KIAA1522		sp|Q9P206-3|K1522_HUMAN, sp|Q9P206|K1522_HUMAN	2	928761	MS/MS	STY:79.9663@GLAGPPAS(1.0000)PGK;
GLGPPSPPAPPR	GLGPPS[79.9663]PPAPPR	R	G	90	101	12	2	6S(79.9663)	sp|Q13425-2|SNTB2_HUMAN	Q13425-2	SNTB2_HUMAN	SNTB2	Isoform 2 of Beta-2-syntrophin		sp|Q13425|SNTB2_HUMAN	6	3.56922e+06	MS/MS	STY:79.9663@GLGPPS(1.0000)PPAPPR;
GLLAQGLRPESPPPAGPLLNGAPAGESPQPK	GLLAQGLRPESPPPAGPLLNGAPAGES[79.9663]PQPK	R	A	642	672	31	3	27S(79.9663)	sp|Q96TA1-2|NIBA2_HUMAN	Q96TA1-2	NIBA2_HUMAN	NIBAN2	Isoform 2 of Protein Niban 2		sp|Q96TA1|NIBA2_HUMAN	3	1.3190891E7	MS/MS	STY:79.9663@GLLAQGLRPES(0.1818)PPPAGPLLNGAPAGES(0.8182)PQPK;
GLLAQGLRPESPPPAGPLLNGAPAGESPQPK	GLLAQGLRPES[79.9663]PPPAGPLLNGAPAGESPQPK	R	A	642	672	31	3	11S(79.9663)	sp|Q96TA1-2|NIBA2_HUMAN	Q96TA1-2	NIBA2_HUMAN	NIBAN2	Isoform 2 of Protein Niban 2		sp|Q96TA1|NIBA2_HUMAN	6	1.3190891E7	MS/MS	STY:79.9663@GLLAQGLRPES(0.9328)PPPAGPLLNGAPAGES(0.0672)PQPK;
GLLAQGLRPESPPPAGPLLNGAPAGESPQPK	GLLAQGLRPES[79.9663]PPPAGPLLNGAPAGES[79.9663]PQPK	R	A	642	672	31	3	11S(79.9663),27S(79.9663)	sp|Q96TA1-2|NIBA2_HUMAN	Q96TA1-2	NIBA2_HUMAN	NIBAN2	Isoform 2 of Protein Niban 2		sp|Q96TA1|NIBA2_HUMAN	6	1.1239418E7	MS/MS	STY:79.9663@GLLAQGLRPES(1.0000)PPPAGPLLNGAPAGES(1.0000)PQPK;
GLLSDSMTDVPVDTGVAAR	GLLS[79.9663]DSMTDVPVDTGVAAR	K	T	16	34	19	2	4S(79.9663)	sp|O43399-2|TPD54_HUMAN	O43399-2	TPD54_HUMAN	TPD52L2	Isoform 2 of Tumor protein D54		sp|O43399-3|TPD54_HUMAN, sp|O43399-4|TPD54_HUMAN, sp|O43399-5|TPD54_HUMAN, sp|O43399-7|TPD54_HUMAN, sp|O43399|TPD54_HUMAN	1	0	MS/MS	STY:79.9663@GLLS(0.8628)DS(0.0582)MT(0.0582)DVPVDT(0.0207)GVAAR;
GLLYDSDEEDEERPAR	GLLYDS[79.9663]DEEDEERPAR	R	K	134	149	16	2	6S(79.9663)	sp|P49736|MCM2_HUMAN	P49736	MCM2_HUMAN	MCM2	DNA replication licensing factor MCM2			1	1.1351982E7	MS/MS	STY:79.9663@GLLY(0.2291)DS(0.7709)DEEDEERPAR;
GLLYDSDEEDEERPAR	GLLY[79.9663]DSDEEDEERPAR	R	K	134	149	16	2,3	4Y(79.9663)	sp|P49736|MCM2_HUMAN	P49736	MCM2_HUMAN	MCM2	DNA replication licensing factor MCM2			3	1.6125662E7	MS/MS	STY:79.9663@GLLY(0.5000)DS(0.5000)DEEDEERPAR;
GLNVIGASDQSPLQSPSNLR	GLNVIGAS[79.9663]DQSPLQSPS[79.9663]NLR	K	D	981	1000	20	3	17S(79.9663),8S(79.9663)	sp|Q9HAU0-2|PKHA5_HUMAN	Q9HAU0-2	PKHA5_HUMAN	PLEKHA5	Isoform 2 of Pleckstrin homology domain-containing family A member 5		sp|Q9HAU0-4|PKHA5_HUMAN, sp|Q9HAU0-5|PKHA5_HUMAN, sp|Q9HAU0-6|PKHA5_HUMAN, sp|Q9HAU0-8|PKHA5_HUMAN, sp|Q9HAU0|PKHA5_HUMAN	1	641416	MS/MS	STY:79.9663@GLNVIGAS(0.5042)DQS(0.5042)PLQS(0.4688)PS(0.5229)NLR;
GLRDSHSSEEDEASSQTDLSQTISK	GLRDSHSSEEDEASSQTDLS[79.9663]QT[79.9663]ISK	R	K	150	174	25	3	20S(79.9663),22T(79.9663)	sp|Q5JTV8-2|TOIP1_HUMAN	Q5JTV8-2	TOIP1_HUMAN	TOR1AIP1	Isoform 2 of Torsin-1A-interacting protein 1		sp|Q5JTV8-3|TOIP1_HUMAN, sp|Q5JTV8-4|TOIP1_HUMAN, sp|Q5JTV8|TOIP1_HUMAN	1	4877724	MS/MS	STY:79.9663@GLRDS(0.0502)HS(0.0502)S(0.0502)EEDEAS(0.0502)S(0.0502)QT(0.0502)DLS(0.5662)QT(0.5662)IS(0.5662)K;
GLRDSHSSEEDEASSQTDLSQTISK	GLRDSHSSEEDEASSQT[79.9663]DLS[79.9663]QT[79.9663]ISK	R	K	150	174	25	3	17T(79.9663),20S(79.9663),22T(79.9663)	sp|Q5JTV8-2|TOIP1_HUMAN	Q5JTV8-2	TOIP1_HUMAN	TOR1AIP1	Isoform 2 of Torsin-1A-interacting protein 1		sp|Q5JTV8-3|TOIP1_HUMAN, sp|Q5JTV8-4|TOIP1_HUMAN, sp|Q5JTV8|TOIP1_HUMAN	1	9.5036E7	MS/MS	STY:79.9663@GLRDS(0.3044)HS(0.3044)S(0.3044)EEDEAS(0.3044)S(0.0383)QT(0.5717)DLS(0.5717)QT(0.5717)IS(0.0291)K;
GLRDSHSSEEDEASSQTDLSQTISK	GLRDSHSSEEDEAS[79.9663]S[79.9663]QT[79.9663]DLSQTISK	R	K	150	174	25	3	14S(79.9663),15S(79.9663),17T(79.9663)	sp|Q5JTV8-2|TOIP1_HUMAN	Q5JTV8-2	TOIP1_HUMAN	TOR1AIP1	Isoform 2 of Torsin-1A-interacting protein 1		sp|Q5JTV8-3|TOIP1_HUMAN, sp|Q5JTV8-4|TOIP1_HUMAN, sp|Q5JTV8|TOIP1_HUMAN	1	8007063	MS/MS	STY:79.9663@GLRDS(0.0883)HS(0.0883)S(0.0883)EEDEAS(0.8236)S(0.8236)QT(0.8236)DLS(0.0567)QT(0.1037)IS(0.1037)K;
GLRDSHSSEEDEASSQTDLSQTISK	GLRDSHS[79.9663]S[79.9663]EEDEASSQTDLSQTISK	R	K	150	174	25	3	7S(79.9663),8S(79.9663)	sp|Q5JTV8-2|TOIP1_HUMAN	Q5JTV8-2	TOIP1_HUMAN	TOR1AIP1	Isoform 2 of Torsin-1A-interacting protein 1		sp|Q5JTV8-3|TOIP1_HUMAN, sp|Q5JTV8-4|TOIP1_HUMAN, sp|Q5JTV8|TOIP1_HUMAN	1	4877724	MS/MS	STY:79.9663@GLRDS(0.0464)HS(0.7902)S(0.7902)EEDEAS(0.0460)S(0.0227)QT(0.0227)DLS(0.0939)QT(0.0939)IS(0.0939)K;
GLRDSHSSEEDEASSQTDLSQTISK	GLRDSHS[79.9663]S[79.9663]EEDEAS[79.9663]SQTDLSQTISK	R	K	150	174	25	3	14S(79.9663),7S(79.9663),8S(79.9663)	sp|Q5JTV8-2|TOIP1_HUMAN	Q5JTV8-2	TOIP1_HUMAN	TOR1AIP1	Isoform 2 of Torsin-1A-interacting protein 1		sp|Q5JTV8-3|TOIP1_HUMAN, sp|Q5JTV8-4|TOIP1_HUMAN, sp|Q5JTV8|TOIP1_HUMAN	1	9.5036E7	MS/MS	STY:79.9663@GLRDS(0.4134)HS(0.6892)S(0.5982)EEDEAS(0.5982)S(0.5982)QT(0.0318)DLS(0.0237)QT(0.0237)IS(0.0237)K;
GLRDSHSSEEDEASSQTDLSQTISK	GLRDS[79.9663]HS[79.9663]SEEDEASSQTDLSQTISK	R	K	150	174	25	3	5S(79.9663),7S(79.9663)	sp|Q5JTV8-2|TOIP1_HUMAN	Q5JTV8-2	TOIP1_HUMAN	TOR1AIP1	Isoform 2 of Torsin-1A-interacting protein 1		sp|Q5JTV8-3|TOIP1_HUMAN, sp|Q5JTV8-4|TOIP1_HUMAN, sp|Q5JTV8|TOIP1_HUMAN	1	4877724	MS/MS	STY:79.9663@GLRDS(0.5858)HS(0.5858)S(0.5858)EEDEAS(0.1121)S(0.0261)QT(0.0261)DLS(0.0261)QT(0.0261)IS(0.0261)K;
GLRDSHSSEEDEASSQTDLSQTISK	GLRDS[79.9663]HS[79.9663]S[79.9663]EEDEASSQTDLSQTISK	R	K	150	174	25	3	5S(79.9663),7S(79.9663),8S(79.9663)	sp|Q5JTV8-2|TOIP1_HUMAN	Q5JTV8-2	TOIP1_HUMAN	TOR1AIP1	Isoform 2 of Torsin-1A-interacting protein 1		sp|Q5JTV8-3|TOIP1_HUMAN, sp|Q5JTV8-4|TOIP1_HUMAN, sp|Q5JTV8|TOIP1_HUMAN	16	1.03248976E8	MS/MS	STY:79.9663@GLRDS(0.8611)HS(0.8611)S(0.8611)EEDEAS(0.0604)S(0.0604)QT(0.0604)DLS(0.0604)QT(0.0875)IS(0.0875)K;
GLVAAYSGESDSEEEQER	GLVAAY[79.9663]S[79.9663]GESDSEEEQER	R	G	726	743	18	2	6Y(79.9663),7S(79.9663)	sp|P98175-2|RBM10_HUMAN	P98175-2	RBM10_HUMAN	RBM10	Isoform 2 of RNA-binding protein 10		sp|P98175-3|RBM10_HUMAN, sp|P98175-4|RBM10_HUMAN, sp|P98175-5|RBM10_HUMAN, sp|P98175|RBM10_HUMAN	3	8615555	MS/MS	STY:79.9663@GLVAAY(0.6681)S(0.6681)GES(0.3319)DS(0.3319)EEEQER;
GLVAAYSGESDSEEEQER	GLVAAY[79.9663]S[79.9663]GESDS[79.9663]EEEQER	R	G	726	743	18	2	12S(79.9663),6Y(79.9663),7S(79.9663)	sp|P98175-2|RBM10_HUMAN	P98175-2	RBM10_HUMAN	RBM10	Isoform 2 of RNA-binding protein 10		sp|P98175-3|RBM10_HUMAN, sp|P98175-4|RBM10_HUMAN, sp|P98175-5|RBM10_HUMAN, sp|P98175|RBM10_HUMAN	1	4.95845e+06	MS/MS	STY:79.9663@GLVAAY(0.7475)S(0.7475)GES(0.7475)DS(0.7575)EEEQER;
GLVAAYSGESDSEEEQER	GLVAAY[79.9663]S[79.9663]GES[79.9663]DSEEEQER	R	G	726	743	18	2	10S(79.9663),6Y(79.9663),7S(79.9663)	sp|P98175-2|RBM10_HUMAN	P98175-2	RBM10_HUMAN	RBM10	Isoform 2 of RNA-binding protein 10		sp|P98175-3|RBM10_HUMAN, sp|P98175-4|RBM10_HUMAN, sp|P98175-5|RBM10_HUMAN, sp|P98175|RBM10_HUMAN	3	4.95845e+06	MS/MS	STY:79.9663@GLVAAY(0.7500)S(0.7500)GES(0.7500)DS(0.7500)EEEQER;
GNAEGSSDEEGKLVIDEPAK	GNAEGS[79.9663]S[79.9663]DEEGKLVIDEPAK	K	E	120	139	20	3	6S(79.9663),7S(79.9663)	sp|P51858-2|HDGF_HUMAN	P51858-2	HDGF_HUMAN	HDGF	Isoform 2 of Hepatoma-derived growth factor		sp|P51858-3|HDGF_HUMAN, sp|P51858|HDGF_HUMAN	1	1.32183e+06	MS/MS	STY:79.9663@GNAEGS(1.0000)S(1.0000)DEEGKLVIDEPAK;
GNDPLTSSPGR	GNDPLTSS[79.9663]PGR	R	S	20	30	11	2	8S(79.9663)	sp|P49736|MCM2_HUMAN	P49736	MCM2_HUMAN	MCM2	DNA replication licensing factor MCM2			1	4.00365e+06	MS/MS	STY:79.9663@GNDPLT(0.0557)S(0.0557)S(0.8885)PGR;
GNDPLTSSPGR	GNDPLTS[79.9663]SPGR	R	S	20	30	11	2	7S(79.9663)	sp|P49736|MCM2_HUMAN	P49736	MCM2_HUMAN	MCM2	DNA replication licensing factor MCM2			2	1.6876314E7	MS/MS	STY:79.9663@GNDPLT(0.0198)S(0.4901)S(0.4901)PGR;
GNDPLTSSPGR	GNDPLTS[79.9663]S[79.9663]PGR	R	S	20	30	11	2	7S(79.9663),8S(79.9663)	sp|P49736|MCM2_HUMAN	P49736	MCM2_HUMAN	MCM2	DNA replication licensing factor MCM2			1	976616	MS/MS	STY:79.9663@GNDPLT(0.2959)S(0.8521)S(0.8521)PGR;
GNDPLTSSPGR	GNDPLT[79.9663]SSPGR	R	S	20	30	11	2	6T(79.9663)	sp|P49736|MCM2_HUMAN	P49736	MCM2_HUMAN	MCM2	DNA replication licensing factor MCM2			9	2.0879968E7	MS/MS	STY:79.9663@GNDPLT(0.3333)S(0.3333)S(0.3333)PGR;
GNDSDGEGESDDPEK	GNDS[79.9663]DGEGESDDPEK	K	K	99	113	15	2	4S(79.9663)	sp|O75351|VPS4B_HUMAN	O75351	VPS4B_HUMAN	VPS4B	Vacuolar protein sorting-associated protein 4B			3	2.056e+06	MS/MS	STY:79.9663@GNDS(0.9211)DGEGES(0.0789)DDPEK;
GNDSDGEGESDDPEKK	GNDS[79.9663]DGEGESDDPEKK	K	K	99	114	16	2	4S(79.9663)	sp|O75351|VPS4B_HUMAN	O75351	VPS4B_HUMAN	VPS4B	Vacuolar protein sorting-associated protein 4B			2	0	MS/MS	STY:79.9663@GNDS(0.8735)DGEGES(0.1265)DDPEKK;
GNENQDESQTSASSCDETEIQISNQEEAER	GNENQDES[79.9663]QTSASSC[57.0215]DETEIQISNQEEAER	K	Q	50	79	30	3	15C(57.0215),8S(79.9663)	sp|Q9BXS6-2|NUSAP_HUMAN	Q9BXS6-2	NUSAP_HUMAN	NUSAP1	Isoform 2 of Nucleolar and spindle-associated protein 1		sp|Q9BXS6-3|NUSAP_HUMAN, sp|Q9BXS6-4|NUSAP_HUMAN, sp|Q9BXS6-5|NUSAP_HUMAN, sp|Q9BXS6-6|NUSAP_HUMAN, sp|Q9BXS6|NUSAP_HUMAN	1	749757	MS/MS	STY:79.9663@GNENQDES(0.1653)QT(0.1653)S(0.1653)AS(0.1653)S(0.1653)CDET(0.1653)EIQIS(0.0084)NQEEAER;
GNVVPSPLPTR	GNVVPS[79.9663]PLPTR	R	R	36	46	11	2	6S(79.9663)	sp|Q9Y2V2|CHSP1_HUMAN	Q9Y2V2	CHSP1_HUMAN	CARHSP1	Calcium-regulated heat-stable protein 1			4	3647335	MS/MS	STY:79.9663@GNVVPS(0.5000)PLPT(0.5000)R;
GPAGEAGASPPVRR	GPAGEAGAS[79.9663]PPVRR	R	V	102	115	14	2	9S(79.9663)	sp|Q13425-2|SNTB2_HUMAN	Q13425-2	SNTB2_HUMAN	SNTB2	Isoform 2 of Beta-2-syntrophin		sp|Q13425|SNTB2_HUMAN	2	1.67045e+06	MS/MS	STY:79.9663@GPAGEAGAS(1.0000)PPVRR;
GPASDSETEDASR	GPASDSET[79.9663]EDAS[79.9663]R	K	H	310	322	13	2	12S(79.9663),8T(79.9663)	sp|Q96ST2|IWS1_HUMAN	Q96ST2	IWS1_HUMAN	IWS1	Protein IWS1 homolog		sp|Q96ST2-3|IWS1_HUMAN	1	3.5124e+06	MS/MS	STY:79.9663@GPAS(0.3641)DS(0.3641)ET(0.6359)EDAS(0.6359)R;
GPASDSETEDASR	GPAS[79.9663]DS[79.9663]ETEDASR	K	H	310	322	13	2	4S(79.9663),6S(79.9663)	sp|Q96ST2|IWS1_HUMAN	Q96ST2	IWS1_HUMAN	IWS1	Protein IWS1 homolog		sp|Q96ST2-3|IWS1_HUMAN	2	3656085	MS/MS	STY:79.9663@GPAS(0.5085)DS(0.5085)ET(0.5085)EDAS(0.4745)R;
GPDEAMEDGEEGSDDEAEWVVTK	GPDEAMEDGEEGS[79.9663]DDEAEWVVTK	R	D	290	312	23	2,3	13S(79.9663)	sp|Q9NZN4-2|EHD2_HUMAN	Q9NZN4-2	EHD2_HUMAN	EHD2	Isoform 2 of EH domain-containing protein 2		sp|Q9NZN4|EHD2_HUMAN	3	8152896	MS/MS	STY:79.9663@GPDEAMEDGEEGS(0.8951)DDEAEWVVT(0.1049)K;
GPDEAMEDGEEGSDDEAEWVVTK	GPDEAM[15.9949]EDGEEGS[79.9663]DDEAEWVVTK	R	D	290	312	23	3	13S(79.9663),6M(15.9949)	sp|Q9NZN4-2|EHD2_HUMAN	Q9NZN4-2	EHD2_HUMAN	EHD2	Isoform 2 of EH domain-containing protein 2		sp|Q9NZN4|EHD2_HUMAN	2	2371588	MS/MS	STY:79.9663@GPDEAMEDGEEGS(0.8042)DDEAEWVVT(0.1958)K;M:15.9949@GPDEAM(1.0000)EDGEEGSDDEAEWVVTK;
GPGQPSSPQR	GPGQPS[79.9663]SPQR	K	L	189	198	10	2	6S(79.9663)	sp|O95400|CD2B2_HUMAN	O95400	CD2B2_HUMAN	CD2BP2	CD2 antigen cytoplasmic tail-binding protein 2			1	1.90529e+06	MS/MS	STY:79.9663@GPGQPS(0.5000)S(0.5000)PQR;
GPKPEPPGSGSPAPPR	GPKPEPPGS[79.9663]GSPAPPR	R	R	652	667	16	2,3	9S(79.9663)	sp|Q9UKJ3-2|GPTC8_HUMAN	Q9UKJ3-2	GPTC8_HUMAN	GPATCH8	Isoform 2 of G patch domain-containing protein 8		sp|Q9UKJ3|GPTC8_HUMAN	4	2522996	MS/MS	STY:79.9663@GPKPEPPGS(0.5000)GS(0.5000)PAPPR;
GPPASSPAPAPK	GPPAS[79.9663]SPAPAPK	R	F	97	108	12	2	5S(79.9663)	sp|Q15942-2|ZYX_HUMAN	Q15942-2	ZYX_HUMAN	ZYX	Isoform 2 of Zyxin		sp|Q15942|ZYX_HUMAN	3	2.81553e+06	MS/MS	STY:79.9663@GPPAS(0.5000)S(0.5000)PAPAPK;
GPPDFSSDEEREPTPVLGSGAAAAGR	GPPDFSSDEEREPTPVLGS[79.9663]GAAAAGR	K	S	61	86	26	3	19S(79.9663)	sp|P42166|LAP2A_HUMAN	P42166	LAP2A_HUMAN	TMPO	Lamina-associated polypeptide 2, isoform alpha		sp|P42167-2|LAP2B_HUMAN, sp|P42167-3|LAP2B_HUMAN, sp|P42167|LAP2B_HUMAN	2	4220082	MS/MS	STY:79.9663@GPPDFS(0.0356)S(0.0356)DEEREPT(0.0484)PVLGS(0.8804)GAAAAGR;
GPPDFSSDEEREPTPVLGSGAAAAGR	GPPDFSSDEEREPT[79.9663]PVLGSGAAAAGR	K	S	61	86	26	3	14T(79.9663)	sp|P42166|LAP2A_HUMAN	P42166	LAP2A_HUMAN	TMPO	Lamina-associated polypeptide 2, isoform alpha		sp|P42167-2|LAP2B_HUMAN, sp|P42167-3|LAP2B_HUMAN, sp|P42167|LAP2B_HUMAN	1	6.23586e+06	MS/MS	STY:79.9663@GPPDFS(0.0781)S(0.0781)DEEREPT(0.8162)PVLGS(0.0276)GAAAAGR;
GPPDFSSDEEREPTPVLGSGAAAAGR	GPPDFSS[79.9663]DEEREPT[79.9663]PVLGSGAAAAGR	K	S	61	86	26	3	14T(79.9663),7S(79.9663)	sp|P42166|LAP2A_HUMAN	P42166	LAP2A_HUMAN	TMPO	Lamina-associated polypeptide 2, isoform alpha		sp|P42167-2|LAP2B_HUMAN, sp|P42167-3|LAP2B_HUMAN, sp|P42167|LAP2B_HUMAN	1	3.4404884E7	MS/MS	STY:79.9663@GPPDFS(0.0949)S(0.9254)DEEREPT(0.9254)PVLGS(0.0543)GAAAAGR;
GPPDFSSDEEREPTPVLGSGAAAAGR	GPPDFSS[79.9663]DEEREPT[79.9663]PVLGS[79.9663]GAAAAGR	K	S	61	86	26	3	14T(79.9663),19S(79.9663),7S(79.9663)	sp|P42166|LAP2A_HUMAN	P42166	LAP2A_HUMAN	TMPO	Lamina-associated polypeptide 2, isoform alpha		sp|P42167-2|LAP2B_HUMAN, sp|P42167-3|LAP2B_HUMAN, sp|P42167|LAP2B_HUMAN	1	1.4934714E7	MS/MS	STY:79.9663@GPPDFS(0.4877)S(0.8370)DEEREPT(0.8370)PVLGS(0.8383)GAAAAGR;
GPPDFSSDEEREPTPVLGSGAAAAGR	GPPDFS[79.9663]SDEEREPTPVLGSGAAAAGR	K	S	61	86	26	3	6S(79.9663)	sp|P42166|LAP2A_HUMAN	P42166	LAP2A_HUMAN	TMPO	Lamina-associated polypeptide 2, isoform alpha		sp|P42167-2|LAP2B_HUMAN, sp|P42167-3|LAP2B_HUMAN, sp|P42167|LAP2B_HUMAN	8	1.0486838E7	MS/MS	STY:79.9663@GPPDFS(0.4844)S(0.4844)DEEREPT(0.0179)PVLGS(0.0134)GAAAAGR;
GPPDFSSDEEREPTPVLGSGAAAAGR	GPPDFS[79.9663]SDEEREPTPVLGS[79.9663]GAAAAGR	K	S	61	86	26	3	19S(79.9663),6S(79.9663)	sp|P42166|LAP2A_HUMAN	P42166	LAP2A_HUMAN	TMPO	Lamina-associated polypeptide 2, isoform alpha		sp|P42167-2|LAP2B_HUMAN, sp|P42167-3|LAP2B_HUMAN, sp|P42167|LAP2B_HUMAN	1	5.12221e+06	MS/MS	STY:79.9663@GPPDFS(0.4909)S(0.4909)DEEREPT(0.4909)PVLGS(0.5272)GAAAAGR;
GPPDFSSDEEREPTPVLGSGAAAAGR	GPPDFS[79.9663]SDEEREPT[79.9663]PVLGSGAAAAGR	K	S	61	86	26	3	14T(79.9663),6S(79.9663)	sp|P42166|LAP2A_HUMAN	P42166	LAP2A_HUMAN	TMPO	Lamina-associated polypeptide 2, isoform alpha		sp|P42167-2|LAP2B_HUMAN, sp|P42167-3|LAP2B_HUMAN, sp|P42167|LAP2B_HUMAN	6	4.293496E7	MS/MS	STY:79.9663@GPPDFS(0.7338)S(0.3789)DEEREPT(0.7398)PVLGS(0.1476)GAAAAGR;
GPPDFSSDEEREPTPVLGSGAAAAGR	GPPDFS[79.9663]SDEEREPT[79.9663]PVLGS[79.9663]GAAAAGR	K	S	61	86	26	3	14T(79.9663),19S(79.9663),6S(79.9663)	sp|P42166|LAP2A_HUMAN	P42166	LAP2A_HUMAN	TMPO	Lamina-associated polypeptide 2, isoform alpha		sp|P42167-2|LAP2B_HUMAN, sp|P42167-3|LAP2B_HUMAN, sp|P42167|LAP2B_HUMAN	1	0	MS/MS	STY:79.9663@GPPDFS(0.7446)S(0.7446)DEEREPT(0.7627)PVLGS(0.7481)GAAAAGR;
GPPDFSSDEEREPTPVLGSGAAAAGR	GPPDFS[79.9663]S[79.9663]DEEREPTPVLGSGAAAAGR	K	S	61	86	26	3	6S(79.9663),7S(79.9663)	sp|P42166|LAP2A_HUMAN	P42166	LAP2A_HUMAN	TMPO	Lamina-associated polypeptide 2, isoform alpha		sp|P42167-2|LAP2B_HUMAN, sp|P42167-3|LAP2B_HUMAN, sp|P42167|LAP2B_HUMAN	17	4.2990564E7	MS/MS	STY:79.9663@GPPDFS(0.9369)S(0.9369)DEEREPT(0.0651)PVLGS(0.0611)GAAAAGR;
GPPDFSSDEEREPTPVLGSGAAAAGR	GPPDFS[79.9663]S[79.9663]DEEREPTPVLGS[79.9663]GAAAAGR	K	S	61	86	26	3	19S(79.9663),6S(79.9663),7S(79.9663)	sp|P42166|LAP2A_HUMAN	P42166	LAP2A_HUMAN	TMPO	Lamina-associated polypeptide 2, isoform alpha		sp|P42167-2|LAP2B_HUMAN, sp|P42167-3|LAP2B_HUMAN, sp|P42167|LAP2B_HUMAN	1	1.4934714E7	MS/MS	STY:79.9663@GPPDFS(0.7601)S(0.7402)DEEREPT(0.7402)PVLGS(0.7594)GAAAAGR;
GPPDFSSDEEREPTPVLGSGAAAAGR	GPPDFS[79.9663]S[79.9663]DEEREPT[79.9663]PVLGSGAAAAGR	K	S	61	86	26	3	14T(79.9663),6S(79.9663),7S(79.9663)	sp|P42166|LAP2A_HUMAN	P42166	LAP2A_HUMAN	TMPO	Lamina-associated polypeptide 2, isoform alpha		sp|P42167-2|LAP2B_HUMAN, sp|P42167-3|LAP2B_HUMAN, sp|P42167|LAP2B_HUMAN	4	1.4934714E7	MS/MS	STY:79.9663@GPPDFS(0.8929)S(0.8929)DEEREPT(0.8923)PVLGS(0.3219)GAAAAGR;
GPPQSPVFEGVYNNSR	GPPQS[79.9663]PVFEGVYNNSR	K	M	107	122	16	2	5S(79.9663)	sp|Q8WWM7-2|ATX2L_HUMAN	Q8WWM7-2	ATX2L_HUMAN	ATXN2L	Isoform 2 of Ataxin-2-like protein		sp|Q8WWM7-3|ATX2L_HUMAN, sp|Q8WWM7-4|ATX2L_HUMAN, sp|Q8WWM7-5|ATX2L_HUMAN, sp|Q8WWM7-6|ATX2L_HUMAN, sp|Q8WWM7-7|ATX2L_HUMAN, sp|Q8WWM7-8|ATX2L_HUMAN, sp|Q8WWM7-9|ATX2L_HUMAN, sp|Q8WWM7|ATX2L_HUMAN	3	6032805	MS/MS	STY:79.9663@GPPQS(0.9042)PVFEGVY(0.0479)NNS(0.0479)R;
GPSPSSPTPPAAAAPAEQAPR	GPS[79.9663]PS[79.9663]SPTPPAAAAPAEQAPR	R	A	103	123	21	3	3S(79.9663),5S(79.9663)	sp|Q86VQ1|GLCI1_HUMAN	Q86VQ1	GLCI1_HUMAN	GLCCI1	Glucocorticoid-induced transcript 1 protein			1	1.22352e+06	MS/MS	STY:79.9663@GPS(0.5000)PS(0.5000)S(0.5000)PT(0.5000)PPAAAAPAEQAPR;
GPSWDPFR	GPS[79.9663]WDPFR	R	D	13	20	8	2	3S(79.9663)	sp|P04792|HSPB1_HUMAN	P04792	HSPB1_HUMAN	HSPB1	Heat shock protein beta-1			5	8347643	MS/MS	STY:79.9663@GPS(1.0000)WDPFR;
GPTTGEGALDLSDVHSPPKSPEGK	GPT[79.9663]T[79.9663]GEGALDLSDVHSPPKSPEGK	K	T	141	164	24	3	3T(79.9663),4T(79.9663)	sp|O95684-2|CEP43_HUMAN	O95684-2	CEP43_HUMAN	CEP43	Isoform 2 of Centrosomal protein 43		sp|O95684|CEP43_HUMAN	1	3.45081e+06	MS/MS	STY:79.9663@GPT(0.4000)T(0.4000)GEGALDLS(0.4000)DVHS(0.4000)PPKS(0.4000)PEGK;
GQAQVPSFR	GQAQVPS[79.9663]FR	K	P	1649	1657	9	2	7S(79.9663)	sp|Q8N201|INT1_HUMAN	Q8N201	INT1_HUMAN	INTS1	Integrator complex subunit 1			1	0	MS/MS	STY:79.9663@GQAQVPS(1.0000)FR;
GQESSSDQEQVDVESIDFSK	GQES[79.9663]SSDQEQVDVESIDFS[79.9663]K	K	E	648	667	20	2	19S(79.9663),4S(79.9663)	sp|Q96JM3|CHAP1_HUMAN	Q96JM3	CHAP1_HUMAN	CHAMP1	Chromosome alignment-maintaining phosphoprotein 1			1	1.7331472E7	MS/MS	STY:79.9663@GQES(0.5650)S(0.5650)S(0.1208)DQEQVDVES(0.1201)IDFS(0.6291)K;
GQESSSDQEQVDVESIDFSK	GQES[79.9663]SS[79.9663]DQEQVDVESIDFSK	K	E	648	667	20	3	4S(79.9663),6S(79.9663)	sp|Q96JM3|CHAP1_HUMAN	Q96JM3	CHAP1_HUMAN	CHAMP1	Chromosome alignment-maintaining phosphoprotein 1			1	3.89098e+06	MS/MS	STY:79.9663@GQES(0.5290)S(0.5290)S(0.5912)DQEQVDVES(0.1755)IDFS(0.1755)K;
GQESSSDQEQVDVESIDFSK	GQES[79.9663]S[79.9663]SDQEQVDVESIDFSK	K	E	648	667	20	2	4S(79.9663),5S(79.9663)	sp|Q96JM3|CHAP1_HUMAN	Q96JM3	CHAP1_HUMAN	CHAMP1	Chromosome alignment-maintaining phosphoprotein 1			3	1.7331472E7	MS/MS	STY:79.9663@GQES(0.6429)S(0.6429)S(0.6429)DQEQVDVES(0.0356)IDFS(0.0356)K;
GQVIIISDSDDDDDER	GQVIIIS[79.9663]DS[79.9663]DDDDDER	R	I	1011	1026	16	2	7S(79.9663),9S(79.9663)	sp|Q7Z333-3|SETX_HUMAN	Q7Z333-3	SETX_HUMAN	SETX	Isoform 3 of Probable helicase senataxin		sp|Q7Z333-4|SETX_HUMAN, sp|Q7Z333|SETX_HUMAN	3	2824788	MS/MS	STY:79.9663@GQVIIIS(1.0000)DS(1.0000)DDDDDER;
GRDDPGQQETDSSEDEDIIGPMPAK	GRDDPGQQET[79.9663]DS[79.9663]S[79.9663]EDEDIIGPMPAK	K	G	129	153	25	3	10T(79.9663),12S(79.9663),13S(79.9663)	sp|Q8IXQ4|GPAM1_HUMAN	Q8IXQ4	GPAM1_HUMAN	GPALPP1	GPALPP motifs-containing protein 1			4	4999364	MS/MS	STY:79.9663@GRDDPGQQET(1.0000)DS(1.0000)S(1.0000)EDEDIIGPMPAK;
GRESDEDTEDASETDLAK	GRES[79.9663]DEDT[79.9663]EDAS[79.9663]ETDLAK	R	H	42	59	18	2	12S(79.9663),4S(79.9663),8T(79.9663)	sp|Q9H7L9|SDS3_HUMAN	Q9H7L9	SDS3_HUMAN	SUDS3	Sin3 histone deacetylase corepressor complex component SDS3			1	2363019	MS/MS	STY:79.9663@GRES(0.7638)DEDT(0.7454)EDAS(0.7454)ET(0.7454)DLAK;
GRLDSSEMDHSENEDYTMSSPLPGK	GRLDS[79.9663]S[79.9663]EMDHSENEDYTMSSPLPGK	K	K	1172	1196	25	3	5S(79.9663),6S(79.9663)	sp|Q9NTI5|PDS5B_HUMAN	Q9NTI5	PDS5B_HUMAN	PDS5B	Sister chromatid cohesion protein PDS5 homolog B		sp|Q9NTI5-2|PDS5B_HUMAN	1	1.90252e+06	MS/MS	STY:79.9663@GRLDS(0.4569)S(0.4569)EMDHS(0.4569)ENEDY(0.2538)T(0.2538)MS(0.0609)S(0.0609)PLPGK;
GRLSPVPVPR	GRLS[79.9663]PVPVPR	R	A	116	125	10	2	4S(79.9663)	sp|Q9UKM9-2|RALY_HUMAN	Q9UKM9-2	RALY_HUMAN	RALY	Isoform 1 of RNA-binding protein Raly		sp|Q9UKM9|RALY_HUMAN	3	5443168	MS/MS	STY:79.9663@GRLS(1.0000)PVPVPR;
GRLTPSPDIIVLSDNEASSPR	GRLT[79.9663]PS[79.9663]PDIIVLSDNEASSPR	R	S	117	137	21	3	4T(79.9663),6S(79.9663)	sp|Q8WXI9|P66B_HUMAN	Q8WXI9	P66B_HUMAN	GATAD2B	Transcriptional repressor p66-beta			2	912866	MS/MS	STY:79.9663@GRLT(0.8742)PS(0.8742)PDIIVLS(0.0927)DNEAS(0.0794)S(0.0794)PR;
GRLTPSPDIIVLSDNEASSPR	GRLT[79.9663]PS[79.9663]PDIIVLSDNEAS[79.9663]SPR	R	S	117	137	21	3	18S(79.9663),4T(79.9663),6S(79.9663)	sp|Q8WXI9|P66B_HUMAN	Q8WXI9	P66B_HUMAN	GATAD2B	Transcriptional repressor p66-beta			2	9007087	MS/MS	STY:79.9663@GRLT(0.7526)PS(0.7526)PDIIVLS(0.0669)DNEAS(0.7139)S(0.7139)PR;
GRLTPSPDIIVLSDNEASSPR	GRLT[79.9663]PS[79.9663]PDIIVLS[79.9663]DNEASSPR	R	S	117	137	21	3	13S(79.9663),4T(79.9663),6S(79.9663)	sp|Q8WXI9|P66B_HUMAN	Q8WXI9	P66B_HUMAN	GATAD2B	Transcriptional repressor p66-beta			1	0	MS/MS	STY:79.9663@GRLT(0.7941)PS(0.7941)PDIIVLS(0.7904)DNEAS(0.3107)S(0.3107)PR;
GRSTDEYSEADEEEEEEEGK	GRS[79.9663]T[79.9663]DEY[79.9663]SEADEEEEEEEGK	R	P	1244	1263	20	2,3	3S(79.9663),4T(79.9663),7Y(79.9663)	sp|Q96T23-2|RSF1_HUMAN	Q96T23-2	RSF1_HUMAN	RSF1	Isoform 2 of Remodeling and spacing factor 1		sp|Q96T23-3|RSF1_HUMAN, sp|Q96T23|RSF1_HUMAN	2	1.21934e+06	MS/MS	STY:79.9663@GRS(0.7500)T(0.7500)DEY(0.7500)S(0.7500)EADEEEEEEEGK;
GSFSDTGLGDGK	GSFS[79.9663]DTGLGDGK	K	M	376	387	12	2	4S(79.9663)	sp|Q9Y2W1|TR150_HUMAN	Q9Y2W1	TR150_HUMAN	THRAP3	Thyroid hormone receptor-associated protein 3			1	2.25328e+06	MS/MS	STY:79.9663@GS(0.0672)FS(0.9017)DT(0.0312)GLGDGK;
GSGTASDDEFENLR	GSGTAS[79.9663]DDEFENLR	R	I	1902	1915	14	2	6S(79.9663)	sp|Q7Z6Z7-2|HUWE1_HUMAN	Q7Z6Z7-2	HUWE1_HUMAN	HUWE1	Isoform 2 of E3 ubiquitin-protein ligase HUWE1		sp|Q7Z6Z7-3|HUWE1_HUMAN, sp|Q7Z6Z7|HUWE1_HUMAN	1	4669307	MS/MS	STY:79.9663@GS(0.0361)GT(0.0361)AS(0.9277)DDEFENLR;
GSPPLPAGPVPSQDITLSSEEEAEVAAPTK	GSPPLPAGPVPSQDIT[79.9663]LS[79.9663]SEEEAEVAAPTK	R	G	454	483	30	3	16T(79.9663),18S(79.9663)	sp|Q3YEC7-2|RABL6_HUMAN	Q3YEC7-2	RABL6_HUMAN	RABL6	Isoform 2 of Rab-like protein 6		sp|Q3YEC7|RABL6_HUMAN	1	0	MS/MS	STY:79.9663@GS(0.0391)PPLPAGPVPS(0.1927)QDIT(0.6297)LS(0.5529)S(0.5529)EEEAEVAAPT(0.0327)K;
GSSDGRGSDSESDLPHR	GSSDGRGSDS[79.9663]ES[79.9663]DLPHR	R	K	224	240	17	3	10S(79.9663),12S(79.9663)	sp|Q9UPQ0-10|LIMC1_HUMAN	Q9UPQ0-10	LIMC1_HUMAN	LIMCH1	Isoform 10 of LIM and calponin homology domains-containing protein 1		sp|Q9UPQ0-2|LIMC1_HUMAN, sp|Q9UPQ0-3|LIMC1_HUMAN, sp|Q9UPQ0-4|LIMC1_HUMAN, sp|Q9UPQ0-5|LIMC1_HUMAN, sp|Q9UPQ0-6|LIMC1_HUMAN, sp|Q9UPQ0-7|LIMC1_HUMAN, sp|Q9UPQ0-8|LIMC1_HUMAN, sp|Q9UPQ0-9|LIMC1_HUMAN, sp|Q9UPQ0|LIMC1_HUMAN	1	1.56176e+06	MS/MS	STY:79.9663@GS(0.1420)S(0.1420)DGRGS(0.1420)DS(0.7870)ES(0.7870)DLPHR;
GSSDGRGSDSESDLPHR	GSSDGRGS[79.9663]DS[79.9663]ES[79.9663]DLPHR	R	K	224	240	17	2	10S(79.9663),12S(79.9663),8S(79.9663)	sp|Q9UPQ0-10|LIMC1_HUMAN	Q9UPQ0-10	LIMC1_HUMAN	LIMCH1	Isoform 10 of LIM and calponin homology domains-containing protein 1		sp|Q9UPQ0-2|LIMC1_HUMAN, sp|Q9UPQ0-3|LIMC1_HUMAN, sp|Q9UPQ0-4|LIMC1_HUMAN, sp|Q9UPQ0-5|LIMC1_HUMAN, sp|Q9UPQ0-6|LIMC1_HUMAN, sp|Q9UPQ0-7|LIMC1_HUMAN, sp|Q9UPQ0-8|LIMC1_HUMAN, sp|Q9UPQ0-9|LIMC1_HUMAN, sp|Q9UPQ0|LIMC1_HUMAN	1	3.33555e+06	MS/MS	STY:79.9663@GS(0.2122)S(0.2122)DGRGS(0.8585)DS(0.8585)ES(0.8585)DLPHR;
GSVPLSSSPPATHFPDETEITNPVPK	GSVPLS[79.9663]SSPPATHFPDETEITNPVPK	K	K	1412	1437	26	3	6S(79.9663)	sp|P11388-2|TOP2A_HUMAN	P11388-2	TOP2A_HUMAN	TOP2A	Isoform 2 of DNA topoisomerase 2-alpha		sp|P11388-3|TOP2A_HUMAN, sp|P11388-4|TOP2A_HUMAN, sp|P11388|TOP2A_HUMAN	1	1.2696233E7	MS/MS	STY:79.9663@GS(0.0093)VPLS(0.8501)S(0.0281)S(0.0281)PPAT(0.0281)HFPDET(0.0281)EIT(0.0281)NPVPK;
GSDSEDEVLR	GS[79.9663]DS[79.9663]EDEVLR	R	M	276	285	10	2	2S(79.9663),4S(79.9663)	sp|Q8WVC0-2|LEO1_HUMAN	Q8WVC0-2	LEO1_HUMAN	LEO1	Isoform 2 of RNA polymerase-associated protein LEO1		sp|Q8WVC0|LEO1_HUMAN	1	1.14228e+06	MS/MS	STY:79.9663@GS(1.0000)DS(1.0000)EDEVLR;
GSDSEDGEFEIQAEDDAR	GS[79.9663]DS[79.9663]EDGEFEIQAEDDAR	R	A	38	55	18	2	2S(79.9663),4S(79.9663)	sp|Q8TDD1-2|DDX54_HUMAN	Q8TDD1-2	DDX54_HUMAN	DDX54	Isoform 2 of ATP-dependent RNA helicase DDX54		sp|Q8TDD1|DDX54_HUMAN	8	7.6081664E7	MS/MS	STY:79.9663@GS(1.0000)DS(1.0000)EDGEFEIQAEDDAR;
GSEDSPPK	GS[79.9663]EDSPPK	K	H	292	299	8	2	2S(79.9663)	sp|P48651-2|PTSS1_HUMAN	P48651-2	PTSS1_HUMAN	PTDSS1	Isoform 2 of Phosphatidylserine synthase 1		sp|P48651-3|PTSS1_HUMAN, sp|P48651|PTSS1_HUMAN	1	442806	MS/MS	STY:79.9663@GS(0.5000)EDS(0.5000)PPK;
GSFSDTGLGDGK	GS[79.9663]FSDTGLGDGK	K	M	376	387	12	2	2S(79.9663)	sp|Q9Y2W1|TR150_HUMAN	Q9Y2W1	TR150_HUMAN	THRAP3	Thyroid hormone receptor-associated protein 3			1	2.25328e+06	MS/MS	STY:79.9663@GS(0.3333)FS(0.3333)DT(0.3333)GLGDGK;
GSGGSSGDELREDDEPVK	GS[79.9663]GGS[79.9663]S[79.9663]GDELREDDEPVK	R	K	365	382	18	2	2S(79.9663),5S(79.9663),6S(79.9663)	sp|Q7Z4V5-2|HDGR2_HUMAN	Q7Z4V5-2	HDGR2_HUMAN	HDGFL2	Isoform 2 of Hepatoma-derived growth factor-related protein 2		sp|Q7Z4V5-3|HDGR2_HUMAN, sp|Q7Z4V5-4|HDGR2_HUMAN, sp|Q7Z4V5|HDGR2_HUMAN	5	8.0322904E7	MS/MS	STY:79.9663@GS(1.0000)GGS(1.0000)S(1.0000)GDELREDDEPVK;
GSGSEQEGEDEEGGER	GS[79.9663]GS[79.9663]EQEGEDEEGGER	K	K	940	955	16	2	2S(79.9663),4S(79.9663)	sp|Q6PD62|CTR9_HUMAN	Q6PD62	CTR9_HUMAN	CTR9	RNA polymerase-associated protein CTR9 homolog			1	893340	MS/MS	STY:79.9663@GS(1.0000)GS(1.0000)EQEGEDEEGGER;
GSGTASDDEFENLR	GS[79.9663]GTASDDEFENLR	R	I	1902	1915	14	2	2S(79.9663)	sp|Q7Z6Z7-2|HUWE1_HUMAN	Q7Z6Z7-2	HUWE1_HUMAN	HUWE1	Isoform 2 of E3 ubiquitin-protein ligase HUWE1		sp|Q7Z6Z7-3|HUWE1_HUMAN, sp|Q7Z6Z7|HUWE1_HUMAN	1	4669307	MS/MS	STY:79.9663@GS(0.3333)GT(0.3333)AS(0.3333)DDEFENLR;
GSPDGSLQTGK	GS[79.9663]PDGSLQTGK	R	P	480	490	11	2	2S(79.9663)	sp|Q8IZL8|PELP1_HUMAN	Q8IZL8	PELP1_HUMAN	PELP1	Proline-, glutamic acid- and leucine-rich protein 1			1	494237	MS/MS	STY:79.9663@GS(0.3333)PDGS(0.3333)LQT(0.3333)GK;
GSPHYFSPFRPY	GS[79.9663]PHYFS[79.9663]PFRPY	R	-	210	221	12	2	2S(79.9663),7S(79.9663)	sp|Q13242|SRSF9_HUMAN	Q13242	SRSF9_HUMAN	SRSF9	Serine/arginine-rich splicing factor 9			1	4693263	MS/MS	STY:79.9663@GS(0.6373)PHY(0.6373)FS(0.6821)PFRPY(0.0433);
GSPSGGSTAEASDTLSIR	GS[79.9663]PSGGSTAEASDTLSIR	R	S	462	479	18	2	2S(79.9663)	sp|Q9P206-2|K1522_HUMAN	Q9P206-2	K1522_HUMAN	KIAA1522	Isoform 2 of Uncharacterized protein KIAA1522		sp|Q9P206-3|K1522_HUMAN, sp|Q9P206|K1522_HUMAN	2	2.66027e+06	MS/MS	STY:79.9663@GS(0.4370)PS(0.4370)GGS(0.0297)T(0.0297)AEAS(0.0222)DT(0.0222)LS(0.0222)IR;
GSPTDAEGSPGLSR	GS[79.9663]PTDAEGSPGLSR	R	V	254	267	14	2	2S(79.9663)	sp|Q8TER5-3|ARH40_HUMAN	Q8TER5-3	ARH40_HUMAN	ARHGEF40	Isoform 3 of Rho guanine nucleotide exchange factor 40		sp|Q8TER5-4|ARH40_HUMAN, sp|Q8TER5|ARH40_HUMAN	1	0	MS/MS	STY:79.9663@GS(0.2500)PT(0.2500)DAEGS(0.2500)PGLS(0.2500)R;
GSPVFLPR	GS[79.9663]PVFLPR	K	K	422	429	8	2	2S(79.9663)	sp|Q9NYV4-2|CDK12_HUMAN	Q9NYV4-2	CDK12_HUMAN	CDK12	Isoform 2 of Cyclin-dependent kinase 12		sp|Q9NYV4-3|CDK12_HUMAN, sp|Q9NYV4|CDK12_HUMAN	1	453919	MS/MS	STY:79.9663@GS(1.0000)PVFLPR;
GSSDGRGSDSESDLPHR	GS[79.9663]SDGRGSDSESDLPHR	R	K	224	240	17	3	2S(79.9663)	sp|Q9UPQ0-10|LIMC1_HUMAN	Q9UPQ0-10	LIMC1_HUMAN	LIMCH1	Isoform 10 of LIM and calponin homology domains-containing protein 1		sp|Q9UPQ0-2|LIMC1_HUMAN, sp|Q9UPQ0-3|LIMC1_HUMAN, sp|Q9UPQ0-4|LIMC1_HUMAN, sp|Q9UPQ0-5|LIMC1_HUMAN, sp|Q9UPQ0-6|LIMC1_HUMAN, sp|Q9UPQ0-7|LIMC1_HUMAN, sp|Q9UPQ0-8|LIMC1_HUMAN, sp|Q9UPQ0-9|LIMC1_HUMAN, sp|Q9UPQ0|LIMC1_HUMAN	2	3.35839e+06	MS/MS	STY:79.9663@GS(0.3730)S(0.3730)DGRGS(0.0847)DS(0.0847)ES(0.0847)DLPHR;
GSSPGIQDTLEAEDGAFETDEAPEDR	GS[79.9663]SPGIQDTLEAEDGAFETDEAPEDR	K	I	239	264	26	3	2S(79.9663)	sp|Q9UNX4|WDR3_HUMAN	Q9UNX4	WDR3_HUMAN	WDR3	WD repeat-containing protein 3			1	0	MS/MS	STY:79.9663@GS(0.4826)S(0.4826)PGIQDT(0.0198)LEAEDGAFET(0.0150)DEAPEDR;
GSSPQNTTTPK	GS[79.9663]SPQNTTTPK	R	P	370	380	11	2	2S(79.9663)	sp|Q27J81-2|INF2_HUMAN	Q27J81-2	INF2_HUMAN	INF2	Isoform 2 of Inverted formin-2		sp|Q27J81|INF2_HUMAN	1	934457	MS/MS	STY:79.9663@GS(0.4832)S(0.4832)PQNT(0.0112)T(0.0112)T(0.0111)PK;
GSSDGRGSDSESDLPHR	GS[79.9663]S[79.9663]DGRGSDSESDLPHR	R	K	224	240	17	2,3	2S(79.9663),3S(79.9663)	sp|Q9UPQ0-10|LIMC1_HUMAN	Q9UPQ0-10	LIMC1_HUMAN	LIMCH1	Isoform 10 of LIM and calponin homology domains-containing protein 1		sp|Q9UPQ0-2|LIMC1_HUMAN, sp|Q9UPQ0-3|LIMC1_HUMAN, sp|Q9UPQ0-4|LIMC1_HUMAN, sp|Q9UPQ0-5|LIMC1_HUMAN, sp|Q9UPQ0-6|LIMC1_HUMAN, sp|Q9UPQ0-7|LIMC1_HUMAN, sp|Q9UPQ0-8|LIMC1_HUMAN, sp|Q9UPQ0-9|LIMC1_HUMAN, sp|Q9UPQ0|LIMC1_HUMAN	6	5936977	MS/MS	STY:79.9663@GS(0.4914)S(0.4914)DGRGS(0.4914)DS(0.4914)ES(0.0344)DLPHR;
GSSDGRGSDSESDLPHR	GS[79.9663]S[79.9663]DGRGS[79.9663]DSESDLPHR	R	K	224	240	17	3	2S(79.9663),3S(79.9663),8S(79.9663)	sp|Q9UPQ0-10|LIMC1_HUMAN	Q9UPQ0-10	LIMC1_HUMAN	LIMCH1	Isoform 10 of LIM and calponin homology domains-containing protein 1		sp|Q9UPQ0-2|LIMC1_HUMAN, sp|Q9UPQ0-3|LIMC1_HUMAN, sp|Q9UPQ0-4|LIMC1_HUMAN, sp|Q9UPQ0-5|LIMC1_HUMAN, sp|Q9UPQ0-6|LIMC1_HUMAN, sp|Q9UPQ0-7|LIMC1_HUMAN, sp|Q9UPQ0-8|LIMC1_HUMAN, sp|Q9UPQ0-9|LIMC1_HUMAN, sp|Q9UPQ0|LIMC1_HUMAN	1	2.02765e+06	MS/MS	STY:79.9663@GS(0.6000)S(0.6000)DGRGS(0.6000)DS(0.6000)ES(0.6000)DLPHR;
GSVPLSSSPPATHFPDETEITNPVPK	GS[79.9663]VPLSSSPPATHFPDETEITNPVPK	K	K	1412	1437	26	3	2S(79.9663)	sp|P11388-2|TOP2A_HUMAN	P11388-2	TOP2A_HUMAN	TOP2A	Isoform 2 of DNA topoisomerase 2-alpha		sp|P11388-3|TOP2A_HUMAN, sp|P11388-4|TOP2A_HUMAN, sp|P11388|TOP2A_HUMAN	3	1.2696233E7	MS/MS	STY:79.9663@GS(0.4762)VPLS(0.4762)S(0.0121)S(0.0121)PPAT(0.0079)HFPDET(0.0078)EIT(0.0078)NPVPK;
GTDTQTPAVLSPSK	GTDTQTPAVLSPS[79.9663]K	K	T	718	731	14	2	13S(79.9663)	sp|P46087-2|NOP2_HUMAN	P46087-2	NOP2_HUMAN	NOP2	Isoform 2 of Probable 28S rRNA (cytosine(4447)-C(5))-methyltransferase		sp|P46087-4|NOP2_HUMAN, sp|P46087|NOP2_HUMAN	1	4522264	MS/MS	STY:79.9663@GT(0.1548)DT(0.1548)QT(0.1548)PAVLS(0.1548)PS(0.3809)K;
GTDTQTPAVLSPSK	GTDTQT[79.9663]PAVLSPSK	K	T	718	731	14	2	6T(79.9663)	sp|P46087-2|NOP2_HUMAN	P46087-2	NOP2_HUMAN	NOP2	Isoform 2 of Probable 28S rRNA (cytosine(4447)-C(5))-methyltransferase		sp|P46087-4|NOP2_HUMAN, sp|P46087|NOP2_HUMAN	1	4522264	MS/MS	STY:79.9663@GT(0.0489)DT(0.0489)QT(0.3008)PAVLS(0.3008)PS(0.3008)K;
GTENEDAGSDYQSDNQASWIHR	GTENEDAGSDYQS[79.9663]DNQASWIHR	K	M	446	467	22	3	13S(79.9663)	sp|P47712|PA24A_HUMAN	P47712	PA24A_HUMAN	PLA2G4A	Cytosolic phospholipase A2			1	0	MS/MS	STY:79.9663@GT(0.0376)ENEDAGS(0.0376)DY(0.0376)QS(0.4436)DNQAS(0.4436)WIHR;
GTEPSTDGETSEAESNYSVSEHHDTILR	GTEPS[79.9663]T[79.9663]DGETS[79.9663]EAESNYSVSEHHDTILR	K	V	78	105	28	3	11S(79.9663),5S(79.9663),6T(79.9663)	sp|Q5QJE6|TDIF2_HUMAN	Q5QJE6	TDIF2_HUMAN	DNTTIP2	Deoxynucleotidyltransferase terminal-interacting protein 2			1	1.2751675E7	MS/MS	STY:79.9663@GT(0.0592)EPS(0.5132)T(0.5132)DGET(0.5132)S(0.6010)EAES(0.0276)NY(0.1917)S(0.1917)VS(0.1917)EHHDT(0.1975)ILR;
GTEPSTDGETSEAESNYSVSEHHDTILR	GTEPS[79.9663]T[79.9663]DGET[79.9663]SEAESNYSVSEHHDTILR	K	V	78	105	28	3	10T(79.9663),5S(79.9663),6T(79.9663)	sp|Q5QJE6|TDIF2_HUMAN	Q5QJE6	TDIF2_HUMAN	DNTTIP2	Deoxynucleotidyltransferase terminal-interacting protein 2			3	1.6713318E7	MS/MS	STY:79.9663@GT(0.0985)EPS(0.6779)T(0.6779)DGET(0.6779)S(0.6779)EAES(0.0420)NY(0.0420)S(0.0420)VS(0.0325)EHHDT(0.0312)ILR;
GTGASGSFK	GTGAS[79.9663]GSFK	K	L	98	106	9	2	5S(79.9663)	sp|P10412|H14_HUMAN	P10412	H14_HUMAN	H1-4	Histone H1.4	H1-1, H1-2, H1-3, H1-5, H1-6	sp|P16401|H15_HUMAN, sp|P16402|H13_HUMAN, sp|P16403|H12_HUMAN, sp|P22492|H1T_HUMAN, sp|Q02539|H11_HUMAN	1	7.74823e+06	MS/MS	STY:79.9663@GT(0.0175)GAS(0.4912)GS(0.4912)FK;
GTGSGGQLQDLDCSSSDDEGAAQNSTK	GTGSGGQLQDLDC[57.0215]S[79.9663]S[79.9663]S[79.9663]DDEGAAQNSTK	R	P	255	281	27	3	13C(57.0215),14S(79.9663),15S(79.9663),16S(79.9663)	sp|P08240-2|SRPRA_HUMAN	P08240-2	SRPRA_HUMAN	SRPRA	Isoform 2 of Signal recognition particle receptor subunit alpha		sp|P08240|SRPRA_HUMAN	3	1.7065958E7	MS/MS	STY:79.9663@GT(0.0722)GS(0.0722)GGQLQDLDCS(0.5711)S(0.5711)S(0.5711)DDEGAAQNS(0.5711)T(0.5711)K;
GTGSGGQLQDLDCSSSDDEGAAQNSTK	GTGS[79.9663]GGQLQDLDC[57.0215]S[79.9663]S[79.9663]SDDEGAAQNSTK	R	P	255	281	27	3	13C(57.0215),14S(79.9663),15S(79.9663),4S(79.9663)	sp|P08240-2|SRPRA_HUMAN	P08240-2	SRPRA_HUMAN	SRPRA	Isoform 2 of Signal recognition particle receptor subunit alpha		sp|P08240|SRPRA_HUMAN	1	0	MS/MS	STY:79.9663@GT(0.2295)GS(0.6573)GGQLQDLDCS(0.6573)S(0.6573)S(0.6573)DDEGAAQNS(0.0707)T(0.0707)K;
GTLDEEDEEADSDTDDIDHR	GTLDEEDEEADS[79.9663]DTDDIDHR	R	V	248	267	20	3	12S(79.9663)	sp|Q9HCN4-2|GPN1_HUMAN	Q9HCN4-2	GPN1_HUMAN	GPN1	Isoform 2 of GPN-loop GTPase 1		sp|Q9HCN4-3|GPN1_HUMAN, sp|Q9HCN4-4|GPN1_HUMAN, sp|Q9HCN4-5|GPN1_HUMAN, sp|Q9HCN4|GPN1_HUMAN	1	3308809	MS/MS	STY:79.9663@GT(0.1958)LDEEDEEADS(0.4021)DT(0.4021)DDIDHR;
GTEPSPGGTPQPSRPVSPAGPPEGVPEEAQPPR	GT[79.9663]EPS[79.9663]PGGTPQPSRPVSPAGPPEGVPEEAQPPR	K	L	110	142	33	3	2T(79.9663),5S(79.9663)	sp|Q8WUZ0-2|BCL7C_HUMAN	Q8WUZ0-2	BCL7C_HUMAN	BCL7C	Isoform 2 of B-cell CLL/lymphoma 7 protein family member C		sp|Q8WUZ0|BCL7C_HUMAN	2	2.45819e+06	MS/MS	STY:79.9663@GT(0.4921)EPS(0.4921)PGGT(0.4921)PQPS(0.4921)RPVS(0.0315)PAGPPEGVPEEAQPPR;
GTEPSTDGETSEAESNYSVSEHHDTILR	GT[79.9663]EPS[79.9663]TDGETSEAESNYSVSEHHDTILR	K	V	78	105	28	3	2T(79.9663),5S(79.9663)	sp|Q5QJE6|TDIF2_HUMAN	Q5QJE6	TDIF2_HUMAN	DNTTIP2	Deoxynucleotidyltransferase terminal-interacting protein 2			2	8502490	MS/MS	STY:79.9663@GT(0.3733)EPS(0.3733)T(0.3733)DGET(0.3733)S(0.3733)EAES(0.0365)NY(0.0365)S(0.0365)VS(0.0112)EHHDT(0.0128)ILR;
GTEPSTDGETSEAESNYSVSEHHDTILR	GT[79.9663]EPS[79.9663]T[79.9663]DGETSEAESNYSVSEHHDTILR	K	V	78	105	28	3	2T(79.9663),5S(79.9663),6T(79.9663)	sp|Q5QJE6|TDIF2_HUMAN	Q5QJE6	TDIF2_HUMAN	DNTTIP2	Deoxynucleotidyltransferase terminal-interacting protein 2			5	1.6534088E7	MS/MS	STY:79.9663@GT(0.4661)EPS(0.4661)T(0.4661)DGET(0.4661)S(0.4661)EAES(0.1643)NY(0.1643)S(0.1643)VS(0.1214)EHHDT(0.0550)ILR;
GTGASGSFK	GT[79.9663]GASGSFK	K	L	98	106	9	2	2T(79.9663)	sp|P10412|H14_HUMAN	P10412	H14_HUMAN	H1-4	Histone H1.4	H1-1, H1-2, H1-3, H1-5, H1-6	sp|P16401|H15_HUMAN, sp|P16402|H13_HUMAN, sp|P16403|H12_HUMAN, sp|P22492|H1T_HUMAN, sp|Q02539|H11_HUMAN	1	7.74823e+06	MS/MS	STY:79.9663@GT(0.4553)GAS(0.4553)GS(0.0893)FK;
GTGQSDDSDIWDDTALIK	GT[79.9663]GQSDDS[79.9663]DIWDDTALIK	R	A	24	41	18	2	2T(79.9663),8S(79.9663)	sp|Q16637-2|SMN_HUMAN	Q16637-2	SMN_HUMAN	SMN1	Isoform SMN-delta5 of Survival motor neuron protein		sp|Q16637-3|SMN_HUMAN, sp|Q16637-4|SMN_HUMAN, sp|Q16637|SMN_HUMAN	1	0	MS/MS	STY:79.9663@GT(0.6192)GQS(0.6192)DDS(0.6699)DIWDDT(0.0918)ALIK;
GTGSGGQLQDLDCSSSDDEGAAQNSTK	GT[79.9663]GS[79.9663]GGQLQDLDC[57.0215]S[79.9663]SSDDEGAAQNSTK	R	P	255	281	27	3	13C(57.0215),14S(79.9663),2T(79.9663),4S(79.9663)	sp|P08240-2|SRPRA_HUMAN	P08240-2	SRPRA_HUMAN	SRPRA	Isoform 2 of Signal recognition particle receptor subunit alpha		sp|P08240|SRPRA_HUMAN	7	1.7065958E7	MS/MS	STY:79.9663@GT(0.6213)GS(0.6213)GGQLQDLDCS(0.6213)S(0.6213)S(0.2010)DDEGAAQNS(0.1569)T(0.1569)K;
GTLDEEDEEADSDTDDIDHR	GT[79.9663]LDEEDEEADSDTDDIDHR	R	V	248	267	20	2,3	2T(79.9663)	sp|Q9HCN4-2|GPN1_HUMAN	Q9HCN4-2	GPN1_HUMAN	GPN1	Isoform 2 of GPN-loop GTPase 1		sp|Q9HCN4-3|GPN1_HUMAN, sp|Q9HCN4-4|GPN1_HUMAN, sp|Q9HCN4-5|GPN1_HUMAN, sp|Q9HCN4|GPN1_HUMAN	3	5107874	MS/MS	STY:79.9663@GT(0.7657)LDEEDEEADS(0.1171)DT(0.1171)DDIDHR;
GTPSQSPVVGR	GT[79.9663]PSQSPVVGR	K	S	176	186	11	2	2T(79.9663)	sp|P52594-2|AGFG1_HUMAN	P52594-2	AGFG1_HUMAN	AGFG1	Isoform 2 of Arf-GAP domain and FG repeat-containing protein 1		sp|P52594-3|AGFG1_HUMAN, sp|P52594-4|AGFG1_HUMAN, sp|P52594|AGFG1_HUMAN	3	5.3638e+06	MS/MS	STY:79.9663@GT(0.4782)PS(0.4782)QS(0.0437)PVVGR;
GVSRSPPK	GVS[79.9663]RS[79.9663]PPK	R	K	72	79	8	2	3S(79.9663),5S(79.9663)	sp|Q8TAD8|SNIP1_HUMAN	Q8TAD8	SNIP1_HUMAN	SNIP1	Smad nuclear-interacting protein 1			1	2.51358e+06	MS/MS	STY:79.9663@GVS(1.0000)RS(1.0000)PPK;
GWSMSEQSEESVGGR	GWS[79.9663]MSEQSEESVGGR	K	V	455	469	15	2	3S(79.9663)	sp|Q9UHB6-2|LIMA1_HUMAN	Q9UHB6-2	LIMA1_HUMAN	LIMA1	Isoform Alpha of LIM domain and actin-binding protein 1		sp|Q9UHB6-3|LIMA1_HUMAN, sp|Q9UHB6-4|LIMA1_HUMAN, sp|Q9UHB6-5|LIMA1_HUMAN, sp|Q9UHB6|LIMA1_HUMAN	1	1.49861e+06	MS/MS	STY:79.9663@GWS(0.2500)MS(0.2500)EQS(0.2500)EES(0.2500)VGGR;
GWSMSEQSEESVGGR	GWS[79.9663]M[15.9949]SEQSEESVGGR	K	V	455	469	15	2	3S(79.9663),4M(15.9949)	sp|Q9UHB6-2|LIMA1_HUMAN	Q9UHB6-2	LIMA1_HUMAN	LIMA1	Isoform Alpha of LIM domain and actin-binding protein 1		sp|Q9UHB6-3|LIMA1_HUMAN, sp|Q9UHB6-4|LIMA1_HUMAN, sp|Q9UHB6-5|LIMA1_HUMAN, sp|Q9UHB6|LIMA1_HUMAN	1	0	MS/MS	STY:79.9663@GWS(0.4633)MS(0.4633)EQS(0.0367)EES(0.0367)VGGR;M:15.9949@GWSM(1.0000)SEQSEESVGGR;
GYYSPYSVSGSGSTAGSR	GYYSPYS[79.9663]VSGSGSTAGSR	K	T	4610	4627	18	2	7S(79.9663)	sp|Q15149|PLEC_HUMAN	Q15149	PLEC_HUMAN	PLEC	Plectin		sp|Q15149-2|PLEC_HUMAN, sp|Q15149-3|PLEC_HUMAN, sp|Q15149-4|PLEC_HUMAN, sp|Q15149-5|PLEC_HUMAN, sp|Q15149-6|PLEC_HUMAN, sp|Q15149-7|PLEC_HUMAN, sp|Q15149-8|PLEC_HUMAN, sp|Q15149-9|PLEC_HUMAN	1	3685176	MS/MS	STY:79.9663@GY(0.0081)Y(0.0081)S(0.0081)PY(0.0135)S(0.4378)VS(0.4378)GS(0.0106)GS(0.0083)T(0.0083)AGS(0.0593)R;
GYYSPYSVSGSGSTAGSR	GYYSPY[79.9663]SVSGSGSTAGSR	K	T	4610	4627	18	2	6Y(79.9663)	sp|Q15149|PLEC_HUMAN	Q15149	PLEC_HUMAN	PLEC	Plectin		sp|Q15149-2|PLEC_HUMAN, sp|Q15149-3|PLEC_HUMAN, sp|Q15149-4|PLEC_HUMAN, sp|Q15149-5|PLEC_HUMAN, sp|Q15149-6|PLEC_HUMAN, sp|Q15149-7|PLEC_HUMAN, sp|Q15149-8|PLEC_HUMAN, sp|Q15149-9|PLEC_HUMAN	1	3685176	MS/MS	STY:79.9663@GY(0.0052)Y(0.0052)S(0.0052)PY(0.2330)S(0.2330)VS(0.2330)GS(0.2330)GS(0.0174)T(0.0174)AGS(0.0174)R;
GYADSPSK	GY[79.9663]ADSPSK	R	G	30	37	8	2	2Y(79.9663)	sp|Q01518-2|CAP1_HUMAN	Q01518-2	CAP1_HUMAN	CAP1	Isoform 2 of Adenylyl cyclase-associated protein 1		sp|Q01518|CAP1_HUMAN	1	0	MS/MS	STY:79.9663@GY(0.3333)ADS(0.3333)PS(0.3333)K;
HAPSPEPAVQGTGVAGVPEESGDAAAIPAK	HAPS[79.9663]PEPAVQGTGVAGVPEESGDAAAIPAK	R	K	20	49	30	3	4S(79.9663)	sp|P13051|UNG_HUMAN	P13051	UNG_HUMAN	UNG	Uracil-DNA glycosylase			3	3.30891e+06	MS/MS	STY:79.9663@HAPS(0.4896)PEPAVQGT(0.4896)GVAGVPEES(0.0208)GDAAAIPAK;
HDSPDPSPPR	HDS[79.9663]PDPS[79.9663]PPR	R	R	195	204	10	2	3S(79.9663),7S(79.9663)	sp|Q9BRD0-2|BUD13_HUMAN	Q9BRD0-2	BUD13_HUMAN	BUD13	Isoform 2 of BUD13 homolog		sp|Q9BRD0|BUD13_HUMAN	1	984918	MS/MS	STY:79.9663@HDS(1.0000)PDPS(1.0000)PPR;
HDSPEDVK	HDS[79.9663]PEDVK	R	R	526	533	8	2	3S(79.9663)	sp|P31948-2|STIP1_HUMAN	P31948-2	STIP1_HUMAN	STIP1	Isoform 2 of Stress-induced-phosphoprotein 1		sp|P31948-3|STIP1_HUMAN, sp|P31948|STIP1_HUMAN	1	3.96057e+06	MS/MS	STY:79.9663@HDS(1.0000)PEDVK;
HDYDDSSEEQSAEDSYEASPGSETQR	HDY[79.9663]DDS[79.9663]SEEQSAEDSYEASPGSETQR	K	R	55	80	26	3	3Y(79.9663),6S(79.9663)	sp|P98175-2|RBM10_HUMAN	P98175-2	RBM10_HUMAN	RBM10	Isoform 2 of RNA-binding protein 10		sp|P98175-5|RBM10_HUMAN, sp|P98175|RBM10_HUMAN	1	892744	MS/MS	STY:79.9663@HDY(0.2748)DDS(0.2748)S(0.2748)EEQS(0.2748)AEDS(0.0381)Y(0.0381)EAS(0.2748)PGS(0.2748)ET(0.2748)QR;
HDYDDSSEEQSAEDSYEASPGSETQR	HDY[79.9663]DDS[79.9663]S[79.9663]EEQSAEDSYEASPGSETQR	K	R	55	80	26	3	3Y(79.9663),6S(79.9663),7S(79.9663)	sp|P98175-2|RBM10_HUMAN	P98175-2	RBM10_HUMAN	RBM10	Isoform 2 of RNA-binding protein 10		sp|P98175-5|RBM10_HUMAN, sp|P98175|RBM10_HUMAN	1	1.09356e+06	MS/MS	STY:79.9663@HDY(0.4883)DDS(0.4883)S(0.4883)EEQS(0.4883)AEDS(0.4883)Y(0.4883)EAS(0.0233)PGS(0.0233)ET(0.0233)QR;
HEVSASTQSTPASSR	HEVS[79.9663]ASTQSTPASSR	K	A	2311	2325	15	2	4S(79.9663)	sp|Q01082|SPTB2_HUMAN	Q01082	SPTB2_HUMAN	SPTBN1	Spectrin beta chain, non-erythrocytic 1			1	0	MS/MS	STY:79.9663@HEVS(0.6674)AS(0.0554)T(0.0554)QS(0.0554)T(0.0554)PAS(0.0554)S(0.0554)R;
HGGSPQPLATTPLSQEPVNPPSEASPTR	HGGSPQPLATTPLSQEPVNPPS[79.9663]EAS[79.9663]PTR	R	D	374	401	28	3	22S(79.9663),25S(79.9663)	sp|Q9UQ35|SRRM2_HUMAN	Q9UQ35	SRRM2_HUMAN	SRRM2	Serine/arginine repetitive matrix protein 2		sp|Q9UQ35-2|SRRM2_HUMAN	1	1.0128436E7	MS/MS	STY:79.9663@HGGS(0.0413)PQPLAT(0.0490)T(0.0490)PLS(0.0490)QEPVNPPS(0.6039)EAS(0.6039)PT(0.6039)R;
HGGSPQPLATTPLSQEPVNPPSEASPTR	HGGSPQPLATTPLS[79.9663]QEPVNPPS[79.9663]EASPTR	R	D	374	401	28	3	14S(79.9663),22S(79.9663)	sp|Q9UQ35|SRRM2_HUMAN	Q9UQ35	SRRM2_HUMAN	SRRM2	Serine/arginine repetitive matrix protein 2		sp|Q9UQ35-2|SRRM2_HUMAN	1	6.20753e+06	MS/MS	STY:79.9663@HGGS(0.3158)PQPLAT(0.0848)T(0.0848)PLS(0.4273)QEPVNPPS(0.3624)EAS(0.3624)PT(0.3624)R;
HGGSPQPLATTPLSQEPVNPPSEASPTR	HGGSPQPLAT[79.9663]T[79.9663]PLSQEPVNPPSEASPTR	R	D	374	401	28	3	10T(79.9663),11T(79.9663)	sp|Q9UQ35|SRRM2_HUMAN	Q9UQ35	SRRM2_HUMAN	SRRM2	Serine/arginine repetitive matrix protein 2		sp|Q9UQ35-2|SRRM2_HUMAN	1	1.0128436E7	MS/MS	STY:79.9663@HGGS(0.1833)PQPLAT(0.3598)T(0.3598)PLS(0.0175)QEPVNPPS(0.3598)EAS(0.3598)PT(0.3598)R;
HGGSPQPLATTPLSQEPVNPPSEASPTR	HGGS[79.9663]PQPLATTPLSQEPVNPPSEAS[79.9663]PTR	R	D	374	401	28	3	25S(79.9663),4S(79.9663)	sp|Q9UQ35|SRRM2_HUMAN	Q9UQ35	SRRM2_HUMAN	SRRM2	Serine/arginine repetitive matrix protein 2		sp|Q9UQ35-2|SRRM2_HUMAN	1	1.0128436E7	MS/MS	STY:79.9663@HGGS(0.5929)PQPLAT(0.0241)T(0.0241)PLS(0.2903)QEPVNPPS(0.0350)EAS(0.5168)PT(0.5168)R;
HGGSPQPLATTPLSQEPVNPPSEASPTR	HGGS[79.9663]PQPLATTPLSQEPVNPPS[79.9663]EASPTR	R	D	374	401	28	3	22S(79.9663),4S(79.9663)	sp|Q9UQ35|SRRM2_HUMAN	Q9UQ35	SRRM2_HUMAN	SRRM2	Serine/arginine repetitive matrix protein 2		sp|Q9UQ35-2|SRRM2_HUMAN	2	1.0128436E7	MS/MS	STY:79.9663@HGGS(0.8657)PQPLAT(0.0281)T(0.0281)PLS(0.0281)QEPVNPPS(0.8542)EAS(0.0978)PT(0.0978)R;
HGGSPQPLATTPLSQEPVNPPSEASPTR	HGGS[79.9663]PQPLAT[79.9663]TPLSQEPVNPPSEASPTR	R	D	374	401	28	3	10T(79.9663),4S(79.9663)	sp|Q9UQ35|SRRM2_HUMAN	Q9UQ35	SRRM2_HUMAN	SRRM2	Serine/arginine repetitive matrix protein 2		sp|Q9UQ35-2|SRRM2_HUMAN	1	6.20753e+06	MS/MS	STY:79.9663@HGGS(0.2857)PQPLAT(0.2857)T(0.2857)PLS(0.2857)QEPVNPPS(0.2857)EAS(0.2857)PT(0.2857)R;
HGGSPQPLATTPLSQEPVNPPSEASPTR	HGGS[79.9663]PQPLAT[79.9663]TPLSQEPVNPPSEAS[79.9663]PTR	R	D	374	401	28	3	10T(79.9663),25S(79.9663),4S(79.9663)	sp|Q9UQ35|SRRM2_HUMAN	Q9UQ35	SRRM2_HUMAN	SRRM2	Serine/arginine repetitive matrix protein 2		sp|Q9UQ35-2|SRRM2_HUMAN	1	2.45428e+06	MS/MS	STY:79.9663@HGGS(0.6683)PQPLAT(0.6642)T(0.1306)PLS(0.1306)QEPVNPPS(0.2003)EAS(0.6030)PT(0.6030)R;
HGGSPQPLATTPLSQEPVNPPSEASPTR	HGGS[79.9663]PQPLAT[79.9663]TPLSQEPVNPPS[79.9663]EASPTR	R	D	374	401	28	3	10T(79.9663),22S(79.9663),4S(79.9663)	sp|Q9UQ35|SRRM2_HUMAN	Q9UQ35	SRRM2_HUMAN	SRRM2	Serine/arginine repetitive matrix protein 2		sp|Q9UQ35-2|SRRM2_HUMAN	1	2.02553e+06	MS/MS	STY:79.9663@HGGS(0.5874)PQPLAT(0.5303)T(0.5303)PLS(0.5303)QEPVNPPS(0.5840)EAS(0.1189)PT(0.1189)R;
HGGSPQPLATTPLSQEPVNPPSEASPTR	HGGS[79.9663]PQPLAT[79.9663]T[79.9663]PLSQEPVNPPSEASPTR	R	D	374	401	28	3	10T(79.9663),11T(79.9663),4S(79.9663)	sp|Q9UQ35|SRRM2_HUMAN	Q9UQ35	SRRM2_HUMAN	SRRM2	Serine/arginine repetitive matrix protein 2		sp|Q9UQ35-2|SRRM2_HUMAN	2	3.33863e+06	MS/MS	STY:79.9663@HGGS(0.4286)PQPLAT(0.4286)T(0.4286)PLS(0.4286)QEPVNPPS(0.4286)EAS(0.4286)PT(0.4286)R;
HGSGADSDYENTQSGDPLLGLEGK	HGS[79.9663]GADSDYENTQSGDPLLGLEGK	R	R	599	622	24	3	3S(79.9663)	sp|Q9Y2X7-3|GIT1_HUMAN	Q9Y2X7-3	GIT1_HUMAN	GIT1	Isoform 3 of ARF GTPase-activating protein GIT1		sp|Q9Y2X7|GIT1_HUMAN	2	1.33613e+06	MS/MS	STY:79.9663@HGS(0.2591)GADS(0.2591)DY(0.2591)ENT(0.1113)QS(0.1113)GDPLLGLEGK;
HGSGADSDYENTQSGDPLLGLEGK	HGS[79.9663]GADSDYENTQS[79.9663]GDPLLGLEGK	R	R	599	622	24	3	14S(79.9663),3S(79.9663)	sp|Q9Y2X7-3|GIT1_HUMAN	Q9Y2X7-3	GIT1_HUMAN	GIT1	Isoform 3 of ARF GTPase-activating protein GIT1		sp|Q9Y2X7|GIT1_HUMAN	1	2.71474e+06	MS/MS	STY:79.9663@HGS(0.3961)GADS(0.3961)DY(0.3961)ENT(0.3961)QS(0.4155)GDPLLGLEGK;
HGSGADSDYENTQSGDPLLGLEGK	HGS[79.9663]GADS[79.9663]DYENTQSGDPLLGLEGK	R	R	599	622	24	3	3S(79.9663),7S(79.9663)	sp|Q9Y2X7-3|GIT1_HUMAN	Q9Y2X7-3	GIT1_HUMAN	GIT1	Isoform 3 of ARF GTPase-activating protein GIT1		sp|Q9Y2X7|GIT1_HUMAN	1	2.71474e+06	MS/MS	STY:79.9663@HGS(0.6470)GADS(0.5807)DY(0.5807)ENT(0.0958)QS(0.0958)GDPLLGLEGK;
HGSVSADEAAR	HGS[79.9663]VSADEAAR	K	T	61	71	11	2	3S(79.9663)	sp|Q9NWW5-2|CLN6_HUMAN	Q9NWW5-2	CLN6_HUMAN	CLN6	Isoform 2 of Ceroid-lipofuscinosis neuronal protein 6		sp|Q9NWW5|CLN6_HUMAN	1	0	MS/MS	STY:79.9663@HGS(0.9432)VS(0.0568)ADEAAR;
HHSDSDEEK	HHS[79.9663]DS[79.9663]DEEK	K	S	90	98	9	2	3S(79.9663),5S(79.9663)	sp|Q9UPT8|ZC3H4_HUMAN	Q9UPT8	ZC3H4_HUMAN	ZC3H4	Zinc finger CCCH domain-containing protein 4			1	0	MS/MS	STY:79.9663@HHS(1.0000)DS(1.0000)DEEK;
HIVSNDSSDSDDESHEPK	HIVSNDSSDSDDES[79.9663]HEPK	K	G	428	445	18	3	14S(79.9663)	sp|P47712|PA24A_HUMAN	P47712	PA24A_HUMAN	PLA2G4A	Cytosolic phospholipase A2			1	0	MS/MS	STY:79.9663@HIVS(0.0604)NDS(0.0604)S(0.0604)DS(0.0682)DDES(0.7507)HEPK;
HIVSNDSSDSDDESHEPK	HIVSNDSSDS[79.9663]DDESHEPK	K	G	428	445	18	3	10S(79.9663)	sp|P47712|PA24A_HUMAN	P47712	PA24A_HUMAN	PLA2G4A	Cytosolic phospholipase A2			6	4.5204864E7	MS/MS	STY:79.9663@HIVS(0.0220)NDS(0.0220)S(0.0220)DS(0.9145)DDES(0.0196)HEPK;
HIVSNDSSDSDDESHEPK	HIVSNDS[79.9663]SDSDDESHEPK	K	G	428	445	18	3	7S(79.9663)	sp|P47712|PA24A_HUMAN	P47712	PA24A_HUMAN	PLA2G4A	Cytosolic phospholipase A2			3	4.5109096E7	MS/MS	STY:79.9663@HIVS(0.0104)NDS(0.3260)S(0.3260)DS(0.3260)DDES(0.0117)HEPK;
HIVSNDSSDSDDESHEPK	HIVSNDS[79.9663]S[79.9663]DSDDESHEPK	K	G	428	445	18	3	7S(79.9663),8S(79.9663)	sp|P47712|PA24A_HUMAN	P47712	PA24A_HUMAN	PLA2G4A	Cytosolic phospholipase A2			1	2.1831068E7	MS/MS	STY:79.9663@HIVS(0.2939)NDS(0.4265)S(0.4265)DS(0.4265)DDES(0.4265)HEPK;
HIVSNDSSDSDDESHEPK	HIVSNDS[79.9663]S[79.9663]DS[79.9663]DDESHEPK	K	G	428	445	18	2,3	10S(79.9663),7S(79.9663),8S(79.9663)	sp|P47712|PA24A_HUMAN	P47712	PA24A_HUMAN	PLA2G4A	Cytosolic phospholipase A2			4	1.7513906E7	MS/MS	STY:79.9663@HIVS(0.1510)NDS(0.7380)S(0.7037)DS(0.7037)DDES(0.7037)HEPK;
HIVSNDSSDSDDESHEPK	HIVS[79.9663]NDSSDSDDESHEPK	K	G	428	445	18	3	4S(79.9663)	sp|P47712|PA24A_HUMAN	P47712	PA24A_HUMAN	PLA2G4A	Cytosolic phospholipase A2			6	4.5204864E7	MS/MS	STY:79.9663@HIVS(0.2474)NDS(0.2474)S(0.2474)DS(0.2474)DDES(0.0103)HEPK;
HIVSNDSSDSDDESHEPK	HIVS[79.9663]NDSSDSDDES[79.9663]HEPK	K	G	428	445	18	3	14S(79.9663),4S(79.9663)	sp|P47712|PA24A_HUMAN	P47712	PA24A_HUMAN	PLA2G4A	Cytosolic phospholipase A2			1	2.1831068E7	MS/MS	STY:79.9663@HIVS(0.8200)NDS(0.2182)S(0.0757)DS(0.0757)DDES(0.8105)HEPK;
HIVSNDSSDSDDESHEPK	HIVS[79.9663]NDSSDS[79.9663]DDESHEPK	K	G	428	445	18	3	10S(79.9663),4S(79.9663)	sp|P47712|PA24A_HUMAN	P47712	PA24A_HUMAN	PLA2G4A	Cytosolic phospholipase A2			2	2.1767974E7	MS/MS	STY:79.9663@HIVS(0.4768)NDS(0.4768)S(0.4768)DS(0.5338)DDES(0.0357)HEPK;
HIVSNDSSDSDDESHEPK	HIVS[79.9663]NDSSDS[79.9663]DDES[79.9663]HEPK	K	G	428	445	18	2	10S(79.9663),14S(79.9663),4S(79.9663)	sp|P47712|PA24A_HUMAN	P47712	PA24A_HUMAN	PLA2G4A	Cytosolic phospholipase A2			1	1.2034231E7	MS/MS	STY:79.9663@HIVS(0.5875)NDS(0.5875)S(0.5875)DS(0.6188)DDES(0.6188)HEPK;
HIVSNDSSDSDDESHEPK	HIVS[79.9663]NDS[79.9663]SDSDDESHEPK	K	G	428	445	18	2,3	4S(79.9663),7S(79.9663)	sp|P47712|PA24A_HUMAN	P47712	PA24A_HUMAN	PLA2G4A	Cytosolic phospholipase A2			10	2.6084446E7	MS/MS	STY:79.9663@HIVS(0.4812)NDS(0.4812)S(0.4812)DS(0.4812)DDES(0.0751)HEPK;
HIVSNDSSDSDDESHEPK	HIVS[79.9663]NDS[79.9663]SDSDDES[79.9663]HEPK	K	G	428	445	18	2	14S(79.9663),4S(79.9663),7S(79.9663)	sp|P47712|PA24A_HUMAN	P47712	PA24A_HUMAN	PLA2G4A	Cytosolic phospholipase A2			1	9570808	MS/MS	STY:79.9663@HIVS(0.5945)NDS(0.5945)S(0.5945)DS(0.5945)DDES(0.6219)HEPK;
HIVSNDSSDSDDESHEPK	HIVS[79.9663]NDS[79.9663]SDS[79.9663]DDESHEPK	K	G	428	445	18	3	10S(79.9663),4S(79.9663),7S(79.9663)	sp|P47712|PA24A_HUMAN	P47712	PA24A_HUMAN	PLA2G4A	Cytosolic phospholipase A2			1	1.757847E7	MS/MS	STY:79.9663@HIVS(0.6919)NDS(0.6919)S(0.6919)DS(0.7264)DDES(0.1978)HEPK;
HIVSNDSSDSDDESHEPK	HIVS[79.9663]NDS[79.9663]S[79.9663]DSDDESHEPK	K	G	428	445	18	2,3	4S(79.9663),7S(79.9663),8S(79.9663)	sp|P47712|PA24A_HUMAN	P47712	PA24A_HUMAN	PLA2G4A	Cytosolic phospholipase A2			5	2.9595984E7	MS/MS	STY:79.9663@HIVS(0.7136)NDS(0.7136)S(0.7136)DS(0.7136)DDES(0.1455)HEPK;
HKSDSPESDAER	HKS[79.9663]DS[79.9663]PES[79.9663]DAER	R	E	854	865	12	2	3S(79.9663),5S(79.9663),8S(79.9663)	sp|O75400-2|PR40A_HUMAN	O75400-2	PR40A_HUMAN	PRPF40A	Isoform 2 of Pre-mRNA-processing factor 40 homolog A		sp|O75400-3|PR40A_HUMAN, sp|O75400|PR40A_HUMAN	2	0	MS/MS	STY:79.9663@HKS(1.0000)DS(1.0000)PES(1.0000)DAER;
HNDIVDSDSDAEDR	HNDIVDS[79.9663]DS[79.9663]DAEDR	K	G	140	153	14	2	7S(79.9663),9S(79.9663)	sp|P78316-2|NOP14_HUMAN	P78316-2	NOP14_HUMAN	NOP14	Isoform 2 of Nucleolar protein 14		sp|P78316|NOP14_HUMAN	17	3.1930196E7	MS/MS	STY:79.9663@HNDIVDS(1.0000)DS(1.0000)DAEDR;
HPASDSEIEELQK	HPAS[79.9663]DS[79.9663]EIEELQK	K	S	154	166	13	2	4S(79.9663),6S(79.9663)	sp|Q96ST2|IWS1_HUMAN	Q96ST2	IWS1_HUMAN	IWS1	Protein IWS1 homolog			9	3.3877648E7	MS/MS	STY:79.9663@HPAS(1.0000)DS(1.0000)EIEELQK;
HQASDSENEELPK	HQAS[79.9663]DS[79.9663]ENEELPK	R	P	232	244	13	2	4S(79.9663),6S(79.9663)	sp|Q96ST2|IWS1_HUMAN	Q96ST2	IWS1_HUMAN	IWS1	Protein IWS1 homolog			23	7.8868592E7	MS/MS	STY:79.9663@HQAS(1.0000)DS(1.0000)ENEELPK;
HQASDSENEEPPK	HQAS[79.9663]DS[79.9663]ENEEPPK	R	P	193	205	13	2	4S(79.9663),6S(79.9663)	sp|Q96ST2|IWS1_HUMAN	Q96ST2	IWS1_HUMAN	IWS1	Protein IWS1 homolog			1	2.05283e+06	MS/MS	STY:79.9663@HQAS(1.0000)DS(1.0000)ENEEPPK;
HQASDSENEEPPKPR	HQAS[79.9663]DS[79.9663]ENEEPPKPR	R	M	193	207	15	2,3	4S(79.9663),6S(79.9663)	sp|Q96ST2|IWS1_HUMAN	Q96ST2	IWS1_HUMAN	IWS1	Protein IWS1 homolog			10	1.3314852E7	MS/MS	STY:79.9663@HQAS(1.0000)DS(1.0000)ENEEPPKPR;
HQIVTMSNDVSEEESEEEEEDSDEEEVELCPILPAK	HQIVTMSNDVS[79.9663]EEESEEEEEDS[79.9663]DEEEVELC[57.0215]PILPAK	R	K	137	172	36	3	11S(79.9663),22S(79.9663),30C(57.0215)	sp|O75607|NPM3_HUMAN	O75607	NPM3_HUMAN	NPM3	Nucleoplasmin-3			1	0	MS/MS	STY:79.9663@HQIVT(0.1713)MS(0.1713)NDVS(0.5385)EEES(0.5385)EEEEEDS(0.5804)DEEEVELCPILPAK;
HQIVTMSNDVSEEESEEEEEDSDEEEVELCPILPAK	HQIVTMSNDVS[79.9663]EEES[79.9663]EEEEEDS[79.9663]DEEEVELC[57.0215]PILPAK	R	K	137	172	36	3	11S(79.9663),15S(79.9663),22S(79.9663),30C(57.0215)	sp|O75607|NPM3_HUMAN	O75607	NPM3_HUMAN	NPM3	Nucleoplasmin-3			1	5.7053216E7	MS/MS	STY:79.9663@HQIVT(0.5422)MS(0.5422)NDVS(0.6386)EEES(0.6385)EEEEEDS(0.6385)DEEEVELCPILPAK;
HRPSPPATPPPK	HRPS[79.9663]PPAT[79.9663]PPPK	R	T	399	410	12	2,3	4S(79.9663),8T(79.9663)	sp|Q8IYB3|SRRM1_HUMAN	Q8IYB3	SRRM1_HUMAN	SRRM1	Serine/arginine repetitive matrix protein 1			13	2.0392152E7	MS/MS	STY:79.9663@HRPS(1.0000)PPAT(1.0000)PPPK;
HSLDSDEEEDDDDGGSSK	HSLDSDEEEDDDDGGS[79.9663]SK	K	Y	45	62	18	2	16S(79.9663)	sp|O95400|CD2B2_HUMAN	O95400	CD2B2_HUMAN	CD2BP2	CD2 antigen cytoplasmic tail-binding protein 2			1	0	MS/MS	STY:79.9663@HS(0.2169)LDS(0.0731)DEEEDDDDGGS(0.3550)S(0.3550)K;
HSLDSDEEEDDDDGGSSK	HSLDS[79.9663]DEEEDDDDGGSSK	K	Y	45	62	18	2	5S(79.9663)	sp|O95400|CD2B2_HUMAN	O95400	CD2B2_HUMAN	CD2BP2	CD2 antigen cytoplasmic tail-binding protein 2			1	8181398	MS/MS	STY:79.9663@HS(0.0335)LDS(0.3222)DEEEDDDDGGS(0.3222)S(0.3222)K;
HSTSPSLDSEYNEELNEDDSQSDEK	HSTSPSLDS[79.9663]EY[79.9663]NEELNEDDSQSDEK	R	D	1084	1108	25	3	11Y(79.9663),9S(79.9663)	sp|P35251-2|RFC1_HUMAN	P35251-2	RFC1_HUMAN	RFC1	Isoform 2 of Replication factor C subunit 1		sp|P35251|RFC1_HUMAN	1	3406486	MS/MS	STY:79.9663@HS(0.1844)T(0.1844)S(0.1844)PS(0.1844)LDS(0.5861)EY(0.5861)NEELNEDDS(0.0451)QS(0.0451)DEK;
HSVTAATPPPSPTSGESGDLLSNLLQSPSSAK	HSVTAATPPPS[79.9663]PTSGESGDLLS[79.9663]NLLQSPSSAK	K	L	184	215	32	3	11S(79.9663),22S(79.9663)	sp|Q96QU8-2|XPO6_HUMAN	Q96QU8-2	XPO6_HUMAN	XPO6	Isoform 2 of Exportin-6		sp|Q96QU8|XPO6_HUMAN	1	0	MS/MS	STY:79.9663@HS(0.0478)VT(0.0478)AAT(0.0478)PPPS(0.4280)PT(0.4280)S(0.3871)GES(0.0210)GDLLS(0.4618)NLLQS(0.0458)PS(0.0424)S(0.0424)AK;
HSLDSDEEEDDDDGGSSK	HS[79.9663]LDSDEEEDDDDGGSSK	K	Y	45	62	18	2,3	2S(79.9663)	sp|O95400|CD2B2_HUMAN	O95400	CD2B2_HUMAN	CD2BP2	CD2 antigen cytoplasmic tail-binding protein 2			5	9494107	MS/MS	STY:79.9663@HS(0.4788)LDS(0.4788)DEEEDDDDGGS(0.0212)S(0.0212)K;
HSPTEDEESAK	HS[79.9663]PTEDEESAK	K	A	969	979	11	2	2S(79.9663)	sp|P46821|MAP1B_HUMAN	P46821	MAP1B_HUMAN	MAP1B	Microtubule-associated protein 1B			1	0	MS/MS	STY:79.9663@HS(0.3333)PT(0.3333)EDEES(0.3333)AK;
HSSISPSTLTLK	HS[79.9663]SIS[79.9663]PSTLTLK	R	S	435	446	12	2	2S(79.9663),5S(79.9663)	sp|Q14004-2|CDK13_HUMAN	Q14004-2	CDK13_HUMAN	CDK13	Isoform 2 of Cyclin-dependent kinase 13		sp|Q14004|CDK13_HUMAN	1	2.97421e+06	MS/MS	STY:79.9663@HS(0.6136)S(0.6136)IS(0.6985)PS(0.0251)T(0.0246)LT(0.0246)LK;
HSSYPAGTEDDEGMGEEPSPFR	HS[79.9663]SYPAGTEDDEGMGEEPSPFR	R	G	73	94	22	3	2S(79.9663)	sp|Q92934|BAD_HUMAN	Q92934	BAD_HUMAN	BAD	Bcl2-associated agonist of cell death			1	854535	MS/MS	STY:79.9663@HS(0.2978)S(0.2978)Y(0.2978)PAGT(0.0899)EDDEGMGEEPS(0.0165)PFR;
HSSISPVR	HS[79.9663]S[79.9663]ISPVR	R	L	381	388	8	2	2S(79.9663),3S(79.9663)	sp|Q9NYV4-2|CDK12_HUMAN	Q9NYV4-2	CDK12_HUMAN	CDK12	Isoform 2 of Cyclin-dependent kinase 12		sp|Q9NYV4-3|CDK12_HUMAN, sp|Q9NYV4|CDK12_HUMAN	1	2.22482e+06	MS/MS	STY:79.9663@HS(0.6843)S(0.6578)IS(0.6578)PVR;
HSSLPTESDEDIAPAQQVDIVTEEMPENALPSDEDDKDPNDPYR	HS[79.9663]S[79.9663]LPTESDEDIAPAQQVDIVTEEMPENALPSDEDDKDPNDPY[79.9663]R	R	A	666	709	44	4	2S(79.9663),3S(79.9663),43Y(79.9663)	sp|O14617-2|AP3D1_HUMAN	O14617-2	AP3D1_HUMAN	AP3D1	Isoform 2 of AP-3 complex subunit delta-1		sp|O14617-3|AP3D1_HUMAN, sp|O14617-5|AP3D1_HUMAN, sp|O14617|AP3D1_HUMAN	1	8514196	MS/MS	STY:79.9663@HS(0.4798)S(0.4798)LPT(0.4798)ES(0.4798)DEDIAPAQQVDIVT(0.3508)EEMPENALPS(0.2051)DEDDKDPNDPY(0.5248)R;
HSTSPSLDSEYNEELNEDDSQSDEK	HS[79.9663]T[79.9663]SPSLDSEYNEELNEDDSQSDEK	R	D	1084	1108	25	3	2S(79.9663),3T(79.9663)	sp|P35251-2|RFC1_HUMAN	P35251-2	RFC1_HUMAN	RFC1	Isoform 2 of Replication factor C subunit 1		sp|P35251|RFC1_HUMAN	1	3463280	MS/MS	STY:79.9663@HS(0.2753)T(0.2753)S(0.2753)PS(0.2753)LDS(0.2753)EY(0.0726)NEELNEDDS(0.2753)QS(0.2753)DEK;
HTGPNSPDTANDGFVR	HTGPNS[79.9663]PDTANDGFVR	K	L	99	114	16	2	6S(79.9663)	sp|P55795|HNRH2_HUMAN	P55795	HNRH2_HUMAN	HNRNPH2	Heterogeneous nuclear ribonucleoprotein H2	HNRNPH1	sp|P31943|HNRH1_HUMAN	1	9583455	MS/MS	STY:79.9663@HT(0.0518)GPNS(0.9093)PDT(0.0389)ANDGFVR;
HTGPNSPDTANDGFVR	HT[79.9663]GPNSPDTANDGFVR	K	L	99	114	16	2	2T(79.9663)	sp|P55795|HNRH2_HUMAN	P55795	HNRH2_HUMAN	HNRNPH2	Heterogeneous nuclear ribonucleoprotein H2	HNRNPH1	sp|P31943|HNRH1_HUMAN	3	9583455	MS/MS	STY:79.9663@HT(0.7768)GPNS(0.1952)PDT(0.0281)ANDGFVR;
HTLGDSDNES	HT[79.9663]LGDSDNES	K	-	174	183	10	2	2T(79.9663)	sp|P02794|FRIH_HUMAN	P02794	FRIH_HUMAN	FTH1	Ferritin heavy chain			2	2.36892e+06	MS/MS	STY:79.9663@HT(0.3333)LGDS(0.3333)DNES(0.3333);
HVDSLSQRSPK	HVDS[79.9663]LSQRSPK	R	A	59	69	11	3	4S(79.9663)	sp|Q9UHD8-2|SEPT9_HUMAN	Q9UHD8-2	SEPT9_HUMAN	SEPTIN9	Isoform 2 of Septin-9		sp|Q9UHD8-5|SEPT9_HUMAN, sp|Q9UHD8-7|SEPT9_HUMAN, sp|Q9UHD8|SEPT9_HUMAN	1	6406307	MS/MS	STY:79.9663@HVDS(0.3333)LS(0.3333)QRS(0.3333)PK;
HVTLPSSPR	HVT[79.9663]LPSSPR	R	S	2713	2721	9	2	3T(79.9663)	sp|Q5T4S7-2|UBR4_HUMAN	Q5T4S7-2	UBR4_HUMAN	UBR4	Isoform 2 of E3 ubiquitin-protein ligase UBR4		sp|Q5T4S7-3|UBR4_HUMAN, sp|Q5T4S7-4|UBR4_HUMAN, sp|Q5T4S7|UBR4_HUMAN	1	985861	MS/MS	STY:79.9663@HVT(0.3333)LPS(0.3333)S(0.3333)PR;
HVTLPSSPRSNTPMGDK	HVT[79.9663]LPS[79.9663]S[79.9663]PRSNTPMGDK	R	D	2713	2729	17	3	3T(79.9663),6S(79.9663),7S(79.9663)	sp|Q5T4S7-2|UBR4_HUMAN	Q5T4S7-2	UBR4_HUMAN	UBR4	Isoform 2 of E3 ubiquitin-protein ligase UBR4		sp|Q5T4S7-3|UBR4_HUMAN, sp|Q5T4S7-4|UBR4_HUMAN, sp|Q5T4S7|UBR4_HUMAN	1	2.55025e+06	MS/MS	STY:79.9663@HVT(0.6000)LPS(0.6000)S(0.6000)PRS(0.6000)NT(0.6000)PMGDK;
IAAPELHKGDSDSEEDEPTK	IAAPELHKGDS[79.9663]DS[79.9663]EEDEPTK	K	K	147	166	20	3	11S(79.9663),13S(79.9663)	sp|Q92733|PRCC_HUMAN	Q92733	PRCC_HUMAN	PRCC	Proline-rich protein PRCC			2	5967310	MS/MS	STY:79.9663@IAAPELHKGDS(0.7628)DS(0.7611)EEDEPT(0.4760)K;
IACDEEFSDSEDEGEGGR	IAC[57.0215]DEEFS[79.9663]DS[79.9663]EDEGEGGR	R	R	385	402	18	2,3	10S(79.9663),3C(57.0215),8S(79.9663)	sp|Q92769-3|HDAC2_HUMAN	Q92769-3	HDAC2_HUMAN	HDAC2	Isoform 2 of Histone deacetylase 2		sp|Q92769|HDAC2_HUMAN	10	2.2584052E7	MS/MS	STY:79.9663@IACDEEFS(1.0000)DS(1.0000)EDEGEGGR;
IACEEEFSDSEEEGEGGR	IAC[57.0215]EEEFS[79.9663]DS[79.9663]EEEGEGGR	R	K	414	431	18	2,3	10S(79.9663),3C(57.0215),8S(79.9663)	sp|Q13547|HDAC1_HUMAN	Q13547	HDAC1_HUMAN	HDAC1	Histone deacetylase 1			14	4.120716E7	MS/MS	STY:79.9663@IACEEEFS(1.0000)DS(1.0000)EEEGEGGR;
IALESEGRPEEQMESDNCSGGDDDWTHLSSK	IALESEGRPEEQMESDNC[57.0215]SGGDDDWT[79.9663]HLS[79.9663]SK	K	E	230	260	31	3	18C(57.0215),26T(79.9663),29S(79.9663)	sp|Q13501-2|SQSTM_HUMAN	Q13501-2	SQSTM_HUMAN	SQSTM1	Isoform 2 of Sequestosome-1		sp|Q13501|SQSTM_HUMAN	1	5337687	MS/MS	STY:79.9663@IALES(0.2704)EGRPEEQMES(0.2237)DNCS(0.2237)GGDDDWT(0.4274)HLS(0.4274)S(0.4274)K;
IALESEGRPEEQMESDNCSGGDDDWTHLSSK	IALESEGRPEEQMES[79.9663]DNC[57.0215]S[79.9663]GGDDDWTHLSSK	K	E	230	260	31	3	15S(79.9663),18C(57.0215),19S(79.9663)	sp|Q13501-2|SQSTM_HUMAN	Q13501-2	SQSTM_HUMAN	SQSTM1	Isoform 2 of Sequestosome-1		sp|Q13501|SQSTM_HUMAN	1	5215276	MS/MS	STY:79.9663@IALES(0.0650)EGRPEEQMES(0.3870)DNCS(0.3870)GGDDDWT(0.3870)HLS(0.3870)S(0.3870)K;
IALESEGRPEEQMESDNCSGGDDDWTHLSSK	IALES[79.9663]EGRPEEQMES[79.9663]DNC[57.0215]SGGDDDWTHLSSK	K	E	230	260	31	3	15S(79.9663),18C(57.0215),5S(79.9663)	sp|Q13501-2|SQSTM_HUMAN	Q13501-2	SQSTM_HUMAN	SQSTM1	Isoform 2 of Sequestosome-1		sp|Q13501|SQSTM_HUMAN	1	5215276	MS/MS	STY:79.9663@IALES(0.6021)EGRPEEQMES(0.6021)DNCS(0.6021)GGDDDWT(0.0779)HLS(0.0578)S(0.0578)K;
IAQVSPGPR	IAQVS[79.9663]PGPR	R	D	259	267	9	2	5S(79.9663)	sp|Q9NQS7-2|INCE_HUMAN	Q9NQS7-2	INCE_HUMAN	INCENP	Isoform 2 of Inner centromere protein		sp|Q9NQS7|INCE_HUMAN	1	459703	MS/MS	STY:79.9663@IAQVS(1.0000)PGPR;
IASDEEIQGTK	IAS[79.9663]DEEIQGTK	R	D	667	677	11	2	3S(79.9663)	sp|Q8WX93-2|PALLD_HUMAN	Q8WX93-2	PALLD_HUMAN	PALLD	Isoform 2 of Palladin		sp|Q8WX93-3|PALLD_HUMAN, sp|Q8WX93-4|PALLD_HUMAN, sp|Q8WX93-5|PALLD_HUMAN, sp|Q8WX93-8|PALLD_HUMAN, sp|Q8WX93-9|PALLD_HUMAN, sp|Q8WX93|PALLD_HUMAN	3	0	MS/MS	STY:79.9663@IAS(0.9411)DEEIQGT(0.0589)K;
IDDRDSDEEGASDR	IDDRDS[79.9663]DEEGASDR	K	R	777	790	14	2	6S(79.9663)	sp|Q8TDD1-2|DDX54_HUMAN	Q8TDD1-2	DDX54_HUMAN	DDX54	Isoform 2 of ATP-dependent RNA helicase DDX54		sp|Q8TDD1|DDX54_HUMAN	1	3.17551e+06	MS/MS	STY:79.9663@IDDRDS(0.9427)DEEGAS(0.0573)DR;
IDEDGENTQIEDTEPMSPVLNSK	IDEDGENTQIEDTEPM[15.9949]S[79.9663]PVLNSK	R	F	541	563	23	3	16M(15.9949),17S(79.9663)	sp|Q12888-2|TP53B_HUMAN	Q12888-2	TP53B_HUMAN	TP53BP1	Isoform 2 of TP53-binding protein 1		sp|Q12888-3|TP53B_HUMAN, sp|Q12888|TP53B_HUMAN	1	0	MS/MS	STY:79.9663@IDEDGENT(0.0270)QIEDT(0.0270)EPMS(0.9179)PVLNS(0.0281)K;M:15.9949@IDEDGENTQIEDTEPM(1.0000)SPVLNSK;
IDEDGENTQIEDTEPMSPVLNSK	IDEDGENTQIEDT[79.9663]EPMSPVLNSK	R	F	541	563	23	3	13T(79.9663)	sp|Q12888-2|TP53B_HUMAN	Q12888-2	TP53B_HUMAN	TP53BP1	Isoform 2 of TP53-binding protein 1		sp|Q12888-3|TP53B_HUMAN, sp|Q12888|TP53B_HUMAN	1	2883668	MS/MS	STY:79.9663@IDEDGENT(0.0316)QIEDT(0.3228)EPMS(0.3228)PVLNS(0.3228)K;
IDEDGENTQIEDTEPMSPVLNSK	IDEDGENT[79.9663]QIEDTEPMSPVLNSK	R	F	541	563	23	3	8T(79.9663)	sp|Q12888-2|TP53B_HUMAN	Q12888-2	TP53B_HUMAN	TP53BP1	Isoform 2 of TP53-binding protein 1		sp|Q12888-3|TP53B_HUMAN, sp|Q12888|TP53B_HUMAN	1	2883668	MS/MS	STY:79.9663@IDEDGENT(0.2500)QIEDT(0.2500)EPMS(0.2500)PVLNS(0.2500)K;
IDEDGENTQIEDTEPMSPVLNSK	IDEDGENT[79.9663]QIEDTEPM[15.9949]SPVLNSK	R	F	541	563	23	3	16M(15.9949),8T(79.9663)	sp|Q12888-2|TP53B_HUMAN	Q12888-2	TP53B_HUMAN	TP53BP1	Isoform 2 of TP53-binding protein 1		sp|Q12888-3|TP53B_HUMAN, sp|Q12888|TP53B_HUMAN	1	0	MS/MS	STY:79.9663@IDEDGENT(0.3268)QIEDT(0.3268)EPMS(0.3268)PVLNS(0.0196)K;M:15.9949@IDEDGENTQIEDTEPM(1.0000)SPVLNSK;
IDGATQSSPAEPK	IDGATQSS[79.9663]PAEPK	K	S	683	695	13	2	8S(79.9663)	sp|Q32MZ4-2|LRRF1_HUMAN	Q32MZ4-2	LRRF1_HUMAN	LRRFIP1	Isoform 2 of Leucine-rich repeat flightless-interacting protein 1		sp|Q32MZ4-3|LRRF1_HUMAN, sp|Q32MZ4|LRRF1_HUMAN	1	2517227	MS/MS	STY:79.9663@IDGAT(0.1000)QS(0.1000)S(0.8001)PAEPK;
IDGATQSSPAEPK	IDGAT[79.9663]QSSPAEPK	K	S	683	695	13	2	5T(79.9663)	sp|Q32MZ4-2|LRRF1_HUMAN	Q32MZ4-2	LRRF1_HUMAN	LRRFIP1	Isoform 2 of Leucine-rich repeat flightless-interacting protein 1		sp|Q32MZ4-3|LRRF1_HUMAN, sp|Q32MZ4|LRRF1_HUMAN	1	2517227	MS/MS	STY:79.9663@IDGAT(0.3333)QS(0.3333)S(0.3333)PAEPK;
IDISPSTFR	IDISPS[79.9663]TFR	R	K	679	687	9	2	6S(79.9663)	sp|Q9Y2W1|TR150_HUMAN	Q9Y2W1	TR150_HUMAN	THRAP3	Thyroid hormone receptor-associated protein 3			1	6615241	MS/MS	STY:79.9663@IDIS(0.0405)PS(0.9174)T(0.0421)FR;
IDISPSTLR	IDISPS[79.9663]TLR	R	K	653	661	9	2	6S(79.9663)	sp|Q9NYF8-2|BCLF1_HUMAN	Q9NYF8-2	BCLF1_HUMAN	BCLAF1	Isoform 2 of Bcl-2-associated transcription factor 1		sp|Q9NYF8-3|BCLF1_HUMAN, sp|Q9NYF8-4|BCLF1_HUMAN, sp|Q9NYF8|BCLF1_HUMAN	1	2348045	MS/MS	STY:79.9663@IDIS(0.0702)PS(0.4649)T(0.4649)LR;
IDISPSTFR	IDIS[79.9663]PSTFR	R	K	679	687	9	2	4S(79.9663)	sp|Q9Y2W1|TR150_HUMAN	Q9Y2W1	TR150_HUMAN	THRAP3	Thyroid hormone receptor-associated protein 3			4	1.0562126E7	MS/MS	STY:79.9663@IDIS(0.9406)PS(0.0297)T(0.0297)FR;
IDISPSTLR	IDIS[79.9663]PSTLR	R	K	653	661	9	2	4S(79.9663)	sp|Q9NYF8-2|BCLF1_HUMAN	Q9NYF8-2	BCLF1_HUMAN	BCLAF1	Isoform 2 of Bcl-2-associated transcription factor 1		sp|Q9NYF8-3|BCLF1_HUMAN, sp|Q9NYF8-4|BCLF1_HUMAN, sp|Q9NYF8|BCLF1_HUMAN	5	9130389	MS/MS	STY:79.9663@IDIS(0.9392)PS(0.0304)T(0.0304)LR;
IDSNISPKK	IDS[79.9663]NISPKK	K	D	148	156	9	2	3S(79.9663)	sp|Q9H501|ESF1_HUMAN	Q9H501	ESF1_HUMAN	ESF1	ESF1 homolog			1	1.16474e+06	MS/MS	STY:79.9663@IDS(0.5000)NIS(0.5000)PKK;
IEDVGSDEEDDSGK	IEDVGSDEEDDS[79.9663]GK	K	D	250	263	14	2	12S(79.9663)	sp|P08238|HS90B_HUMAN	P08238	HS90B_HUMAN	HSP90AB1	Heat shock protein HSP 90-beta	HSP90AB2P	sp|Q58FF8|H90B2_HUMAN	4	7.7430579E8	MS/MS	STY:79.9663@IEDVGS(0.0599)DEEDDS(0.9401)GK;
IEDVGSDEEDDSGK	IEDVGS[79.9663]DEEDDSGK	K	D	250	263	14	2	6S(79.9663)	sp|P08238|HS90B_HUMAN	P08238	HS90B_HUMAN	HSP90AB1	Heat shock protein HSP 90-beta	HSP90AB2P	sp|Q58FF8|H90B2_HUMAN	18	7.7430579E8	MS/MS	STY:79.9663@IEDVGS(0.9436)DEEDDS(0.0564)GK;
IEDVGSDEEDDSGK	IEDVGS[79.9663]DEEDDS[79.9663]GK	K	D	250	263	14	2	12S(79.9663),6S(79.9663)	sp|P08238|HS90B_HUMAN	P08238	HS90B_HUMAN	HSP90AB1	Heat shock protein HSP 90-beta	HSP90AB2P	sp|Q58FF8|H90B2_HUMAN	2	2.11395e+06	MS/MS	STY:79.9663@IEDVGS(1.0000)DEEDDS(1.0000)GK;
IEDVTPIPSDSTR	IEDVTPIPSDS[79.9663]TR	R	R	129	141	13	2	11S(79.9663)	sp|P62263|RS14_HUMAN	P62263	RS14_HUMAN	RPS14	Small ribosomal subunit protein uS11			1	0	MS/MS	STY:79.9663@IEDVT(0.0143)PIPS(0.0146)DS(0.4856)T(0.4856)R;
IESDEEEDFENVGK	IES[79.9663]DEEEDFENVGK	R	V	1312	1325	14	2	3S(79.9663)	sp|Q96T23-2|RSF1_HUMAN	Q96T23-2	RSF1_HUMAN	RSF1	Isoform 2 of Remodeling and spacing factor 1		sp|Q96T23-3|RSF1_HUMAN, sp|Q96T23|RSF1_HUMAN	1	0	MS/MS	STY:79.9663@IES(1.0000)DEEEDFENVGK;
IESPKLER	IES[79.9663]PKLER	K	T	766	773	8	2	3S(79.9663)	sp|Q92598-3|HS105_HUMAN	Q92598-3	HS105_HUMAN	HSPH1	Isoform 3 of Heat shock protein 105 kDa		sp|Q92598-2|HS105_HUMAN, sp|Q92598-4|HS105_HUMAN, sp|Q92598|HS105_HUMAN	1	7.049e+06	MS/MS	STY:79.9663@IES(1.0000)PKLER;
IGDEYAEDSSDEEDIR	IGDEYAEDS[79.9663]S[79.9663]DEEDIR	R	N	6	21	16	2	10S(79.9663),9S(79.9663)	sp|Q14137-2|BOP1_HUMAN	Q14137-2	BOP1_HUMAN	BOP1	Isoform 2 of Ribosome biogenesis protein BOP1		sp|Q14137|BOP1_HUMAN	5	4.2937016E7	MS/MS	STY:79.9663@IGDEY(0.1336)AEDS(0.9332)S(0.9332)DEEDIR;
IGDEYAEDSSDEEDIR	IGDEY[79.9663]AEDS[79.9663]SDEEDIR	R	N	6	21	16	2	5Y(79.9663),9S(79.9663)	sp|Q14137-2|BOP1_HUMAN	Q14137-2	BOP1_HUMAN	BOP1	Isoform 2 of Ribosome biogenesis protein BOP1		sp|Q14137|BOP1_HUMAN	3	4.3443004E7	MS/MS	STY:79.9663@IGDEY(0.7512)AEDS(0.7556)S(0.4932)DEEDIR;
IGEGTYGVVYK	IGEGTYGVVY[79.9663]K	K	G	10	20	11	2	10Y(79.9663)	sp|P06493-2|CDK1_HUMAN	P06493-2	CDK1_HUMAN	CDK1	Isoform 2 of Cyclin-dependent kinase 1	CDK2, CDK3	sp|P06493|CDK1_HUMAN, sp|P24941-2|CDK2_HUMAN, sp|P24941|CDK2_HUMAN, sp|Q00526|CDK3_HUMAN	2	1.75386e+06	MS/MS	STY:79.9663@IGEGT(0.2184)Y(0.2184)GVVY(0.5632)K;
IGEGTYGVVYK	IGEGTY[79.9663]GVVYK	K	G	10	20	11	2	6Y(79.9663)	sp|P06493-2|CDK1_HUMAN	P06493-2	CDK1_HUMAN	CDK1	Isoform 2 of Cyclin-dependent kinase 1	CDK2, CDK3	sp|P06493|CDK1_HUMAN, sp|P24941-2|CDK2_HUMAN, sp|P24941|CDK2_HUMAN, sp|Q00526|CDK3_HUMAN	1	1.81616e+06	MS/MS	STY:79.9663@IGEGT(0.0271)Y(0.4864)GVVY(0.4864)K;
IGEGTYGVVYK	IGEGT[79.9663]YGVVY[79.9663]K	K	G	10	20	11	2	10Y(79.9663),5T(79.9663)	sp|P06493-2|CDK1_HUMAN	P06493-2	CDK1_HUMAN	CDK1	Isoform 2 of Cyclin-dependent kinase 1	CDK2, CDK3	sp|P06493|CDK1_HUMAN, sp|P24941-2|CDK2_HUMAN, sp|P24941|CDK2_HUMAN, sp|Q00526|CDK3_HUMAN	1	0	MS/MS	STY:79.9663@IGEGT(0.6606)Y(0.6606)GVVY(0.6788)K;
IGEGTYGVVYK	IGEGT[79.9663]Y[79.9663]GVVYK	K	G	10	20	11	2	5T(79.9663),6Y(79.9663)	sp|P06493-2|CDK1_HUMAN	P06493-2	CDK1_HUMAN	CDK1	Isoform 2 of Cyclin-dependent kinase 1	CDK2, CDK3	sp|P06493|CDK1_HUMAN, sp|P24941-2|CDK2_HUMAN, sp|P24941|CDK2_HUMAN, sp|Q00526|CDK3_HUMAN	4	1.4748184E7	MS/MS	STY:79.9663@IGEGT(0.9364)Y(0.9364)GVVY(0.1271)K;
IHDLEDDLEMSSDASDASGEEGGR	IHDLEDDLEMS[79.9663]SDAS[79.9663]DAS[79.9663]GEEGGR	R	V	207	230	24	3	11S(79.9663),15S(79.9663),18S(79.9663)	sp|P35269|T2FA_HUMAN	P35269	T2FA_HUMAN	GTF2F1	General transcription factor IIF subunit 1			1	4454930	MS/MS	STY:79.9663@IHDLEDDLEMS(0.7404)S(0.7404)DAS(0.7586)DAS(0.7606)GEEGGR;
IIYDSDSESEETLQVK	IIYDSDS[79.9663]ES[79.9663]EETLQVK	R	N	65	80	16	2	7S(79.9663),9S(79.9663)	sp|P35251-2|RFC1_HUMAN	P35251-2	RFC1_HUMAN	RFC1	Isoform 2 of Replication factor C subunit 1		sp|P35251|RFC1_HUMAN	1	2.3153568E7	MS/MS	STY:79.9663@IIY(0.0554)DS(0.0554)DS(0.6768)ES(0.6062)EET(0.6062)LQVK;
IIYDSDSESEETLQVK	IIYDS[79.9663]DS[79.9663]ESEETLQVK	R	N	65	80	16	2	5S(79.9663),7S(79.9663)	sp|P35251-2|RFC1_HUMAN	P35251-2	RFC1_HUMAN	RFC1	Isoform 2 of Replication factor C subunit 1		sp|P35251|RFC1_HUMAN	1	2.3622446E7	MS/MS	STY:79.9663@IIY(0.0829)DS(0.9189)DS(0.9189)ES(0.0410)EET(0.0382)LQVK;
IIYDSDSESEETLQVK	IIY[79.9663]DS[79.9663]DSESEETLQVK	R	N	65	80	16	2	3Y(79.9663),5S(79.9663)	sp|P35251-2|RFC1_HUMAN	P35251-2	RFC1_HUMAN	RFC1	Isoform 2 of Replication factor C subunit 1		sp|P35251|RFC1_HUMAN	5	2.4469452E7	MS/MS	STY:79.9663@IIY(0.6455)DS(0.6455)DS(0.6455)ES(0.0317)EET(0.0317)LQVK;
ILLVDSPGMGNADDEQQEEGTSSK	ILLVDSPGMGNADDEQQEEGT[79.9663]SSK	K	Q	606	629	24	3	21T(79.9663)	sp|Q9UKN8|TF3C4_HUMAN	Q9UKN8	TF3C4_HUMAN	GTF3C4	General transcription factor 3C polypeptide 4			1	1.96851e+06	MS/MS	STY:79.9663@ILLVDS(0.0441)PGMGNADDEQQEEGT(0.3186)S(0.3186)S(0.3186)K;
ILLVDSPGMGNADDEQQEEGTSSK	ILLVDS[79.9663]PGMGNADDEQQEEGTSSK	K	Q	606	629	24	3	6S(79.9663)	sp|Q9UKN8|TF3C4_HUMAN	Q9UKN8	TF3C4_HUMAN	GTF3C4	General transcription factor 3C polypeptide 4			2	3.11964e+06	MS/MS	STY:79.9663@ILLVDS(0.9275)PGMGNADDEQQEEGT(0.0242)S(0.0242)S(0.0242)K;
ILLVDSPGMGNADDEQQEEGTSSK	ILLVDS[79.9663]PGM[15.9949]GNADDEQQEEGTSSK	K	Q	606	629	24	3	6S(79.9663),9M(15.9949)	sp|Q9UKN8|TF3C4_HUMAN	Q9UKN8	TF3C4_HUMAN	GTF3C4	General transcription factor 3C polypeptide 4			1	986553	MS/MS	STY:79.9663@ILLVDS(0.2500)PGMGNADDEQQEEGT(0.2500)S(0.2500)S(0.2500)K;M:15.9949@ILLVDSPGM(1.0000)GNADDEQQEEGTSSK;
ILSQSTDSLNMR	ILSQST[79.9663]DSLNMR	R	N	170	181	12	2	6T(79.9663)	sp|Q92974-2|ARHG2_HUMAN	Q92974-2	ARHG2_HUMAN	ARHGEF2	Isoform 2 of Rho guanine nucleotide exchange factor 2		sp|Q92974-3|ARHG2_HUMAN, sp|Q92974|ARHG2_HUMAN	1	1.0042e+06	MS/MS	STY:79.9663@ILS(0.1204)QS(0.0379)T(0.4208)DS(0.4208)LNMR;
INPDNYGMDLNSDDSTDDEAHPR	INPDNY[79.9663]GMDLNSDDS[79.9663]T[79.9663]DDEAHPR	K	K	813	835	23	3	15S(79.9663),16T(79.9663),6Y(79.9663)	sp|Q9NQS7-2|INCE_HUMAN	Q9NQS7-2	INCE_HUMAN	INCENP	Isoform 2 of Inner centromere protein		sp|Q9NQS7|INCE_HUMAN	1	1.0223827E7	MS/MS	STY:79.9663@INPDNY(0.7408)GMDLNS(0.7408)DDS(0.7592)T(0.7592)DDEAHPR;
INPDNYGMDLNSDDSTDDEAHPR	INPDNY[79.9663]GMDLNS[79.9663]DDST[79.9663]DDEAHPR	K	K	813	835	23	3	12S(79.9663),16T(79.9663),6Y(79.9663)	sp|Q9NQS7-2|INCE_HUMAN	Q9NQS7-2	INCE_HUMAN	INCENP	Isoform 2 of Inner centromere protein		sp|Q9NQS7|INCE_HUMAN	1	1.0409397E7	MS/MS	STY:79.9663@INPDNY(0.7575)GMDLNS(0.7413)DDS(0.7413)T(0.7599)DDEAHPR;
INPDNYGMDLNSDDSTDDEAHPR	INPDNY[79.9663]GMDLNS[79.9663]DDS[79.9663]TDDEAHPR	K	K	813	835	23	3	12S(79.9663),15S(79.9663),6Y(79.9663)	sp|Q9NQS7-2|INCE_HUMAN	Q9NQS7-2	INCE_HUMAN	INCENP	Isoform 2 of Inner centromere protein		sp|Q9NQS7|INCE_HUMAN	1	9808216	MS/MS	STY:79.9663@INPDNY(0.7552)GMDLNS(0.7483)DDS(0.7483)T(0.7483)DDEAHPR;
INSSGESGDESDEFLQSR	INS[79.9663]S[79.9663]GES[79.9663]GDESDEFLQSR	R	K	180	197	18	2	3S(79.9663),4S(79.9663),7S(79.9663)	sp|O60841|IF2P_HUMAN	O60841	IF2P_HUMAN	EIF5B	Eukaryotic translation initiation factor 5B			1	0	MS/MS	STY:79.9663@INS(0.8179)S(0.8179)GES(0.8179)GDES(0.2732)DEFLQS(0.2732)R;
IQEQESSGEEDSDLSPEER	IQEQESSGEEDS[79.9663]DLS[79.9663]PEER	R	E	116	134	19	3	12S(79.9663),15S(79.9663)	sp|P41236|IPP2_HUMAN	P41236	IPP2_HUMAN	PPP1R2	Protein phosphatase inhibitor 2	PPP1R2B	sp|Q6NXS1|IPP2B_HUMAN	1	6105379	MS/MS	STY:79.9663@IQEQES(0.4508)S(0.4508)GEEDS(0.5492)DLS(0.5492)PEER;
IQEQESSGEEDSDLSPEER	IQEQES[79.9663]SGEEDSDLSPEER	R	E	116	134	19	2	6S(79.9663)	sp|P41236|IPP2_HUMAN	P41236	IPP2_HUMAN	PPP1R2	Protein phosphatase inhibitor 2	PPP1R2B	sp|Q6NXS1|IPP2B_HUMAN	1	0	MS/MS	STY:79.9663@IQEQES(0.2500)S(0.2500)GEEDS(0.2500)DLS(0.2500)PEER;
IQEQESSGEEDSDLSPEER	IQEQES[79.9663]S[79.9663]GEEDSDLSPEER	R	E	116	134	19	2,3	6S(79.9663),7S(79.9663)	sp|P41236|IPP2_HUMAN	P41236	IPP2_HUMAN	PPP1R2	Protein phosphatase inhibitor 2	PPP1R2B	sp|Q6NXS1|IPP2B_HUMAN	9	2.6041336E7	MS/MS	STY:79.9663@IQEQES(0.9381)S(0.9381)GEEDS(0.0581)DLS(0.0658)PEER;
IQQFDDGGSDEEDIWEEK	IQQFDDGGS[79.9663]DEEDIWEEK	R	H	603	620	18	2	9S(79.9663)	sp|Q5H9R7-2|PP6R3_HUMAN	Q5H9R7-2	PP6R3_HUMAN	PPP6R3	Isoform 2 of Serine/threonine-protein phosphatase 6 regulatory subunit 3		sp|Q5H9R7-3|PP6R3_HUMAN, sp|Q5H9R7-4|PP6R3_HUMAN, sp|Q5H9R7-5|PP6R3_HUMAN, sp|Q5H9R7-6|PP6R3_HUMAN, sp|Q5H9R7|PP6R3_HUMAN	3	8210527	MS/MS	STY:79.9663@IQQFDDGGS(1.0000)DEEDIWEEK;
ISMQDVDLSLGSPK	ISMQDVDLS[79.9663]LGSPK	K	L	500	513	14	2	9S(79.9663)	sp|Q09666|AHNK_HUMAN	Q09666	AHNK_HUMAN	AHNAK	Neuroblast differentiation-associated protein AHNAK			1	0	MS/MS	STY:79.9663@IS(0.0549)MQDVDLS(0.4725)LGS(0.4725)PK;
ISDSESEDPPR	IS[79.9663]DS[79.9663]ESEDPPR	R	H	247	257	11	2	2S(79.9663),4S(79.9663)	sp|Q96ST2|IWS1_HUMAN	Q96ST2	IWS1_HUMAN	IWS1	Protein IWS1 homolog		sp|Q96ST2-3|IWS1_HUMAN	3	8422129	MS/MS	STY:79.9663@IS(0.6667)DS(0.6667)ES(0.6667)EDPPR;
ISINQTPGK	IS[79.9663]INQTPGK	R	S	1043	1051	9	2	2S(79.9663)	sp|Q8WWI1-2|LMO7_HUMAN	Q8WWI1-2	LMO7_HUMAN	LMO7	Isoform 2 of LIM domain only protein 7		sp|Q8WWI1-3|LMO7_HUMAN, sp|Q8WWI1-4|LMO7_HUMAN, sp|Q8WWI1-5|LMO7_HUMAN, sp|Q8WWI1|LMO7_HUMAN	1	1.40285e+06	MS/MS	STY:79.9663@IS(0.5000)INQT(0.5000)PGK;
ISMQDVDLSLGSPK	IS[79.9663]M[15.9949]QDVDLSLGSPK	K	L	500	513	14	2	2S(79.9663),3M(15.9949)	sp|Q09666|AHNK_HUMAN	Q09666	AHNK_HUMAN	AHNAK	Neuroblast differentiation-associated protein AHNAK			1	1.02801e+06	MS/MS	STY:79.9663@IS(0.3333)MQDVDLS(0.3333)LGS(0.3333)PK;M:15.9949@ISM(1.0000)QDVDLSLGSPK;
IVEPEVVGESDSEVEGDAWR	IVEPEVVGES[79.9663]DS[79.9663]EVEGDAWR	K	M	107	126	20	2,3	10S(79.9663),12S(79.9663)	sp|P55081|MFAP1_HUMAN	P55081	MFAP1_HUMAN	MFAP1	Microfibrillar-associated protein 1			8	7.8417984E7	MS/MS	STY:79.9663@IVEPEVVGES(1.0000)DS(1.0000)EVEGDAWR;
IVRGDQPAASGDSDDDEPPPLPR	IVRGDQPAAS[79.9663]GDSDDDEPPPLPR	K	L	45	67	23	3	10S(79.9663)	sp|O00264-2|PGRC1_HUMAN	O00264-2	PGRC1_HUMAN	PGRMC1	Isoform 2 of Membrane-associated progesterone receptor component 1		sp|O00264|PGRC1_HUMAN	2	4297108	MS/MS	STY:79.9663@IVRGDQPAAS(0.5000)GDS(0.5000)DDDEPPPLPR;
IYHLPDAESDEDEDFK	IYHLPDAES[79.9663]DEDEDFK	K	E	245	260	16	2	9S(79.9663)	sp|Q15019-2|SEPT2_HUMAN	Q15019-2	SEPT2_HUMAN	SEPTIN2	Isoform 2 of Septin-2		sp|Q15019-3|SEPT2_HUMAN, sp|Q15019|SEPT2_HUMAN	4	2.3318948E7	MS/MS	STY:79.9663@IY(0.0557)HLPDAES(0.9443)DEDEDFK;
IYHLPDAESDEDEDFK	IY[79.9663]HLPDAESDEDEDFK	K	E	245	260	16	2,3	2Y(79.9663)	sp|Q15019-2|SEPT2_HUMAN	Q15019-2	SEPT2_HUMAN	SEPTIN2	Isoform 2 of Septin-2		sp|Q15019-3|SEPT2_HUMAN, sp|Q15019|SEPT2_HUMAN	5	2.5167448E7	MS/MS	STY:79.9663@IY(0.7061)HLPDAES(0.2939)DEDEDFK;
IYNISGNGSPLADSK	IY[79.9663]NISGNGSPLADSK	R	E	211	225	15	2	2Y(79.9663)	sp|Q53HL2|BOREA_HUMAN	Q53HL2	BOREA_HUMAN	CDCA8	Borealin			1	744969	MS/MS	STY:79.9663@IY(0.2500)NIS(0.2500)GNGS(0.2500)PLADS(0.2500)K;
KAASPSPQSVR	KAAS[79.9663]PS[79.9663]PQSVR	K	R	735	745	11	2	4S(79.9663),6S(79.9663)	sp|Q8IYB3|SRRM1_HUMAN	Q8IYB3	SRRM1_HUMAN	SRRM1	Serine/arginine repetitive matrix protein 1		sp|Q8IYB3-2|SRRM1_HUMAN	1	0	MS/MS	STY:79.9663@KAAS(0.6667)PS(0.6667)PQS(0.6667)VR;
KAEDSDSEPEPEDNVR	KAEDS[79.9663]DS[79.9663]EPEPEDNVR	R	L	419	434	16	2	5S(79.9663),7S(79.9663)	sp|Q9H0D6-2|XRN2_HUMAN	Q9H0D6-2	XRN2_HUMAN	XRN2	Isoform 2 of 5'-3' exoribonuclease 2		sp|Q9H0D6|XRN2_HUMAN	5	1.010264E7	MS/MS	STY:79.9663@KAEDS(1.0000)DS(1.0000)EPEPEDNVR;
KAEGAATEEEGTPK	KAEGAATEEEGT[79.9663]PK	K	E	25	38	14	2	12T(79.9663)	sp|P80723|BASP1_HUMAN	P80723	BASP1_HUMAN	BASP1	Brain acid soluble protein 1		sp|P80723-2|BASP1_HUMAN	2	0	MS/MS	STY:79.9663@KAEGAAT(0.0811)EEEGT(0.9189)PK;
KAEGEPQEESPLK	KAEGEPQEES[79.9663]PLK	K	S	166	178	13	2,3	10S(79.9663)	sp|Q9NYF8-2|BCLF1_HUMAN	Q9NYF8-2	BCLF1_HUMAN	BCLAF1	Isoform 2 of Bcl-2-associated transcription factor 1		sp|Q9NYF8-3|BCLF1_HUMAN, sp|Q9NYF8-4|BCLF1_HUMAN, sp|Q9NYF8|BCLF1_HUMAN	11	3.7667836E7	MS/MS	STY:79.9663@KAEGEPQEES(1.0000)PLK;
KAEQGSEEEGEGEEEEEEGGESK	KAEQGS[79.9663]EEEGEGEEEEEEGGESK	K	A	223	245	23	2,3	6S(79.9663)	sp|Q8NE71|ABCF1_HUMAN	Q8NE71	ABCF1_HUMAN	ABCF1	ATP-binding cassette sub-family F member 1			7	1.475844E7	MS/MS	STY:79.9663@KAEQGS(0.9179)EEEGEGEEEEEEGGES(0.0821)K;
KAPAGQEEPGTPPSSPLSAEQLDR	KAPAGQEEPGT[79.9663]PPS[79.9663]SPLSAEQLDR	K	I	50	73	24	3	11T(79.9663),14S(79.9663)	sp|P13051|UNG_HUMAN	P13051	UNG_HUMAN	UNG	Uracil-DNA glycosylase		sp|P13051-2|UNG_HUMAN	1	1.31817e+06	MS/MS	STY:79.9663@KAPAGQEEPGT(0.5000)PPS(0.5000)S(0.5000)PLS(0.5000)AEQLDR;
KASGSENEGDYNPGR	KAS[79.9663]GS[79.9663]ENEGDYNPGR	R	K	1543	1557	15	2	3S(79.9663),5S(79.9663)	sp|Q02880-2|TOP2B_HUMAN	Q02880-2	TOP2B_HUMAN	TOP2B	Isoform Beta-1 of DNA topoisomerase 2-beta		sp|Q02880|TOP2B_HUMAN	1	1.75216e+06	MS/MS	STY:79.9663@KAS(0.6667)GS(0.6667)ENEGDY(0.6667)NPGR;
KASPEPEGEAAGK	KAS[79.9663]PEPEGEAAGK	R	M	382	394	13	2	3S(79.9663)	sp|Q8IU81|I2BP1_HUMAN	Q8IU81	I2BP1_HUMAN	IRF2BP1	Interferon regulatory factor 2-binding protein 1			1	0	MS/MS	STY:79.9663@KAS(1.0000)PEPEGEAAGK;
KDDSDDDGGGWITPSNIK	KDDS[79.9663]DDDGGGWITPSNIK	R	Q	198	215	18	2	4S(79.9663)	sp|Q9ULX3|NOB1_HUMAN	Q9ULX3	NOB1_HUMAN	NOB1	RNA-binding protein NOB1			1	2.49787e+06	MS/MS	STY:79.9663@KDDS(0.4898)DDDGGGWIT(0.4898)PS(0.0205)NIK;
KDDSHSAEDSEDEK	KDDS[79.9663]HS[79.9663]AEDSEDEK	K	E	70	83	14	2	4S(79.9663),6S(79.9663)	sp|Q9H1E3|NUCKS_HUMAN	Q9H1E3	NUCKS_HUMAN	NUCKS1	Nuclear ubiquitous casein and cyclin-dependent kinase substrate 1		sp|Q9H1E3-2|NUCKS_HUMAN	1	2.42337e+06	MS/MS	STY:79.9663@KDDS(0.6667)HS(0.6667)AEDS(0.6667)EDEK;
KDDSHSAEDSEDEK	KDDS[79.9663]HS[79.9663]AEDS[79.9663]EDEK	K	E	70	83	14	2	10S(79.9663),4S(79.9663),6S(79.9663)	sp|Q9H1E3|NUCKS_HUMAN	Q9H1E3	NUCKS_HUMAN	NUCKS1	Nuclear ubiquitous casein and cyclin-dependent kinase substrate 1		sp|Q9H1E3-2|NUCKS_HUMAN	1	1.9583e+06	MS/MS	STY:79.9663@KDDS(1.0000)HS(1.0000)AEDS(1.0000)EDEK;
KDEETEESEYDSEHENSEPVTNIR	KDEET[79.9663]EES[79.9663]EYDSEHENSEPVT[79.9663]NIR	R	N	526	549	24	3	21T(79.9663),5T(79.9663),8S(79.9663)	sp|Q15154-2|PCM1_HUMAN	Q15154-2	PCM1_HUMAN	PCM1	Isoform 2 of Pericentriolar material 1 protein		sp|Q15154-4|PCM1_HUMAN, sp|Q15154-5|PCM1_HUMAN, sp|Q15154|PCM1_HUMAN	1	5121581	MS/MS	STY:79.9663@KDEET(0.4937)EES(0.4937)EY(0.4937)DS(0.4937)EHENS(0.4937)EPVT(0.5314)NIR;
KDEETEESEYDSEHENSEPVTNIR	KDEET[79.9663]EES[79.9663]EY[79.9663]DSEHENSEPVTNIR	R	N	526	549	24	3	10Y(79.9663),5T(79.9663),8S(79.9663)	sp|Q15154-2|PCM1_HUMAN	Q15154-2	PCM1_HUMAN	PCM1	Isoform 2 of Pericentriolar material 1 protein		sp|Q15154-4|PCM1_HUMAN, sp|Q15154-5|PCM1_HUMAN, sp|Q15154|PCM1_HUMAN	1	5072105	MS/MS	STY:79.9663@KDEET(0.5842)EES(0.5842)EY(0.5842)DS(0.5842)EHENS(0.5842)EPVT(0.0791)NIR;
KDGCNGVPSR	KDGC[57.0215]NGVPS[79.9663]R	K	R	487	496	10	2	4C(57.0215),9S(79.9663)	sp|O95365|ZBT7A_HUMAN	O95365	ZBT7A_HUMAN	ZBTB7A	Zinc finger and BTB domain-containing protein 7A			1	0	MS/MS	STY:79.9663@KDGCNGVPS(1.0000)R;
KDSEGYSESPDLEFEYADTDK	KDSEGYSESPDLEFEY[79.9663]ADTDK	R	W	57	77	21	3	16Y(79.9663)	sp|Q5VSL9|STRP1_HUMAN	Q5VSL9	STRP1_HUMAN	STRIP1	Striatin-interacting protein 1		sp|Q5VSL9-4|STRP1_HUMAN	1	1.31148e+06	MS/MS	STY:79.9663@KDS(0.0743)EGY(0.0743)S(0.0743)ES(0.0743)PDLEFEY(0.3514)ADT(0.3514)DK;
KDSASEEEAR	KDS[79.9663]ASEEEAR	R	V	256	265	10	2	3S(79.9663)	sp|Q9NX58|LYAR_HUMAN	Q9NX58	LYAR_HUMAN	LYAR	Cell growth-regulating nucleolar protein			2	0	MS/MS	STY:79.9663@KDS(0.9220)AS(0.0780)EEEAR;
KDSEGYSESPDLEFEYADTDK	KDS[79.9663]EGYSESPDLEFEYADTDK	R	W	57	77	21	3	3S(79.9663)	sp|Q5VSL9|STRP1_HUMAN	Q5VSL9	STRP1_HUMAN	STRIP1	Striatin-interacting protein 1		sp|Q5VSL9-4|STRP1_HUMAN	1	1.31148e+06	MS/MS	STY:79.9663@KDS(0.1667)EGY(0.1667)S(0.1667)ES(0.1667)PDLEFEY(0.1667)ADT(0.1667)DK;
KEDSDEEEDDDSEEDEEDDEDEDEDEDEIEPAAMK	KEDS[79.9663]DEEEDDDSEEDEEDDEDEDEDEDEIEPAAMK	K	A	142	176	35	3	4S(79.9663)	sp|P19338|NUCL_HUMAN	P19338	NUCL_HUMAN	NCL	Nucleolin			3	1.43875e+06	MS/MS	STY:79.9663@KEDS(0.5000)DEEEDDDS(0.5000)EEDEEDDEDEDEDEDEIEPAAMK;
KEDSDEEEDDDSEEDEEDDEDEDEDEDEIEPAAMK	KEDS[79.9663]DEEEDDDS[79.9663]EEDEEDDEDEDEDEDEIEPAAMK	K	A	142	176	35	3,4	12S(79.9663),4S(79.9663)	sp|P19338|NUCL_HUMAN	P19338	NUCL_HUMAN	NCL	Nucleolin			63	6.928425E8	MS/MS	STY:79.9663@KEDS(1.0000)DEEEDDDS(1.0000)EEDEEDDEDEDEDEDEIEPAAMK;
KEDSDEEEDDDSEEDEEDDEDEDEDEDEIEPAAMK	KEDS[79.9663]DEEEDDDS[79.9663]EEDEEDDEDEDEDEDEIEPAAM[15.9949]K	K	A	142	176	35	3,4	12S(79.9663),34M(15.9949),4S(79.9663)	sp|P19338|NUCL_HUMAN	P19338	NUCL_HUMAN	NCL	Nucleolin			40	2.53347616E8	MS/MS	STY:79.9663@KEDS(1.0000)DEEEDDDS(1.0000)EEDEEDDEDEDEDEDEIEPAAMK;M:15.9949@KEDSDEEEDDDSEEDEEDDEDEDEDEDEIEPAAM(1.0000)K;
KEDSSDSENAEPDLDDNEDEEEPAVEIEPEPEPQPVTPAPPPAK	KEDS[79.9663]SDSENAEPDLDDNEDEEEPAVEIEPEPEPQPVT[79.9663]PAPPPAK	K	K	278	321	44	4	37T(79.9663),4S(79.9663)	sp|P49711-2|CTCF_HUMAN	P49711-2	CTCF_HUMAN	CTCF	Isoform 2 of Transcriptional repressor CTCF		sp|P49711|CTCF_HUMAN	1	2645055	MS/MS	STY:79.9663@KEDS(0.4969)S(0.4969)DS(0.4969)ENAEPDLDDNEDEEEPAVEIEPEPEPQPVT(0.5094)PAPPPAK;
KEDSSDSENAEPDLDDNEDEEEPAVEIEPEPEPQPVTPAPPPAK	KEDS[79.9663]S[79.9663]DSENAEPDLDDNEDEEEPAVEIEPEPEPQPVT[79.9663]PAPPPAK	K	K	278	321	44	5	37T(79.9663),4S(79.9663),5S(79.9663)	sp|P49711-2|CTCF_HUMAN	P49711-2	CTCF_HUMAN	CTCF	Isoform 2 of Transcriptional repressor CTCF		sp|P49711|CTCF_HUMAN	1	0	MS/MS	STY:79.9663@KEDS(0.7455)S(0.7455)DS(0.7455)ENAEPDLDDNEDEEEPAVEIEPEPEPQPVT(0.7634)PAPPPAK;
KEDSSDSENAEPDLDDNEDEEEPAVEIEPEPEPQPVTPAPPPAK	KEDS[79.9663]S[79.9663]DS[79.9663]ENAEPDLDDNEDEEEPAVEIEPEPEPQPVTPAPPPAK	K	K	278	321	44	4,5,6	4S(79.9663),5S(79.9663),7S(79.9663)	sp|P49711-2|CTCF_HUMAN	P49711-2	CTCF_HUMAN	CTCF	Isoform 2 of Transcriptional repressor CTCF		sp|P49711|CTCF_HUMAN	13	1.51338784E8	MS/MS	STY:79.9663@KEDS(0.9440)S(0.9440)DS(0.9440)ENAEPDLDDNEDEEEPAVEIEPEPEPQPVT(0.1680)PAPPPAK;
KEDTAFSDWSDEDVPDR	KEDT[79.9663]AFS[79.9663]DWSDEDVPDR	K	T	1059	1075	17	2,3	4T(79.9663),7S(79.9663)	sp|Q5T200-2|ZC3HD_HUMAN	Q5T200-2	ZC3HD_HUMAN	ZC3H13	Isoform 2 of Zinc finger CCCH domain-containing protein 13		sp|Q5T200|ZC3HD_HUMAN	2	974323	MS/MS	STY:79.9663@KEDT(0.6667)AFS(0.6667)DWS(0.6667)DEDVPDR;
KEESEESDDDMGFGLFD	KEESEES[79.9663]DDDMGFGLFD	K	-	99	115	17	2	7S(79.9663)	sp|P05387|RLA2_HUMAN	P05387	RLA2_HUMAN	RPLP2	Large ribosomal subunit protein P2	RPLP1	sp|P05386-2|RLA1_HUMAN, sp|P05386|RLA1_HUMAN	1	0	MS/MS	STY:79.9663@KEES(0.0587)EES(0.9413)DDDMGFGLFD;
KEESEESDDDMGFGLFD	KEESEES[79.9663]DDDM[15.9949]GFGLFD	K	-	99	115	17	2	11M(15.9949),7S(79.9663)	sp|P05387|RLA2_HUMAN	P05387	RLA2_HUMAN	RPLP2	Large ribosomal subunit protein P2	RPLP1	sp|P05386-2|RLA1_HUMAN, sp|P05386|RLA1_HUMAN	1	2.1567792E7	MS/MS	STY:79.9663@KEES(0.0651)EES(0.9349)DDDMGFGLFD;M:15.9949@KEESEESDDDM(1.0000)GFGLFD;
KEESEESDDDMGFGLFD	KEES[79.9663]EESDDDM[15.9949]GFGLFD	K	-	99	115	17	2	11M(15.9949),4S(79.9663)	sp|P05387|RLA2_HUMAN	P05387	RLA2_HUMAN	RPLP2	Large ribosomal subunit protein P2	RPLP1	sp|P05386-2|RLA1_HUMAN, sp|P05386|RLA1_HUMAN	2	2.1567792E7	MS/MS	STY:79.9663@KEES(0.9372)EES(0.0628)DDDMGFGLFD;M:15.9949@KEESEESDDDM(1.0000)GFGLFD;
KEESEESDDDMGFGLFD	KEES[79.9663]EES[79.9663]DDDMGFGLFD	K	-	99	115	17	2	4S(79.9663),7S(79.9663)	sp|P05387|RLA2_HUMAN	P05387	RLA2_HUMAN	RPLP2	Large ribosomal subunit protein P2	RPLP1	sp|P05386-2|RLA1_HUMAN, sp|P05386|RLA1_HUMAN	14	3.90447514E9	MS/MS	STY:79.9663@KEES(1.0000)EES(1.0000)DDDMGFGLFD;
KEESEESDDDMGFGLFD	KEES[79.9663]EES[79.9663]DDDM[15.9949]GFGLFD	K	-	99	115	17	2	11M(15.9949),4S(79.9663),7S(79.9663)	sp|P05387|RLA2_HUMAN	P05387	RLA2_HUMAN	RPLP2	Large ribosomal subunit protein P2	RPLP1	sp|P05386-2|RLA1_HUMAN, sp|P05386|RLA1_HUMAN	10	1.70405606E9	MS/MS	STY:79.9663@KEES(1.0000)EES(1.0000)DDDMGFGLFD;M:15.9949@KEESEESDDDM(1.0000)GFGLFD;
KEESPPPPK	KEES[79.9663]PPPPK	K	V	888	896	9	2	4S(79.9663)	sp|P78332|RBM6_HUMAN	P78332	RBM6_HUMAN	RBM6	RNA-binding protein 6		sp|P78332-2|RBM6_HUMAN	1	1.23859e+06	MS/MS	STY:79.9663@KEES(1.0000)PPPPK;
KEETPGTPK	KEET[79.9663]PGTPK	K	K	152	160	9	2	4T(79.9663)	sp|Q99442|SEC62_HUMAN	Q99442	SEC62_HUMAN	SEC62	Translocation protein SEC62			1	8670747	MS/MS	STY:79.9663@KEET(0.5000)PGT(0.5000)PK;
KEPDDSRDEDEDEDESSEEDSEDEEPPPK	KEPDDSRDEDEDEDES[79.9663]S[79.9663]EEDS[79.9663]EDEEPPPK	K	R	388	416	29	3	16S(79.9663),17S(79.9663),21S(79.9663)	sp|Q5SSJ5-2|HP1B3_HUMAN	Q5SSJ5-2	HP1B3_HUMAN	HP1BP3	Isoform 2 of Heterochromatin protein 1-binding protein 3		sp|Q5SSJ5-3|HP1B3_HUMAN, sp|Q5SSJ5|HP1B3_HUMAN	11	4.5813516E7	MS/MS	STY:79.9663@KEPDDS(0.2257)RDEDEDEDES(0.9248)S(0.9248)EEDS(0.9248)EDEEPPPK;
KEPDDSRDEDEDEDESSEEDSEDEEPPPK	KEPDDS[79.9663]RDEDEDEDES[79.9663]SEEDS[79.9663]EDEEPPPK	K	R	388	416	29	3	16S(79.9663),21S(79.9663),6S(79.9663)	sp|Q5SSJ5-2|HP1B3_HUMAN	Q5SSJ5-2	HP1B3_HUMAN	HP1BP3	Isoform 2 of Heterochromatin protein 1-binding protein 3		sp|Q5SSJ5-3|HP1B3_HUMAN, sp|Q5SSJ5|HP1B3_HUMAN	4	4.0529772E7	MS/MS	STY:79.9663@KEPDDS(0.7512)RDEDEDEDES(0.7433)S(0.7433)EEDS(0.7621)EDEEPPPK;
KEPDDSRDEDEDEDESSEEDSEDEEPPPK	KEPDDS[79.9663]RDEDEDEDES[79.9663]S[79.9663]EEDSEDEEPPPK	K	R	388	416	29	3,4	16S(79.9663),17S(79.9663),6S(79.9663)	sp|Q5SSJ5-2|HP1B3_HUMAN	Q5SSJ5-2	HP1B3_HUMAN	HP1BP3	Isoform 2 of Heterochromatin protein 1-binding protein 3		sp|Q5SSJ5-3|HP1B3_HUMAN, sp|Q5SSJ5|HP1B3_HUMAN	25	5.1078468E7	MS/MS	STY:79.9663@KEPDDS(0.9106)RDEDEDEDES(0.9106)S(0.9106)EEDS(0.2682)EDEEPPPK;
KEQESDEEEEEEEEDEPSGATTR	KEQES[79.9663]DEEEEEEEEDEPSGATTR	K	S	2982	3004	23	3	5S(79.9663)	sp|Q8NFC6|BD1L1_HUMAN	Q8NFC6	BD1L1_HUMAN	BOD1L1	Biorientation of chromosomes in cell division protein 1-like 1			3	664460	MS/MS	STY:79.9663@KEQES(0.5994)DEEEEEEEEDEPS(0.1335)GAT(0.1335)T(0.1335)R;
KESVSPEDSEK	KES[79.9663]VSPEDSEK	K	K	364	374	11	2	3S(79.9663)	sp|P35251-2|RFC1_HUMAN	P35251-2	RFC1_HUMAN	RFC1	Isoform 2 of Replication factor C subunit 1		sp|P35251|RFC1_HUMAN	1	0	MS/MS	STY:79.9663@KES(0.3333)VS(0.3333)PEDS(0.3333)EK;
KETESEAEDNLDDLEK	KET[79.9663]ESEAEDNLDDLEK	K	H	870	885	16	2,3	3T(79.9663)	sp|Q8IYB3|SRRM1_HUMAN	Q8IYB3	SRRM1_HUMAN	SRRM1	Serine/arginine repetitive matrix protein 1		sp|Q8IYB3-2|SRRM1_HUMAN	6	1.3296723E7	MS/MS	STY:79.9663@KET(0.5000)ES(0.5000)EAEDNLDDLEK;
KETESEAEDNLDDLEK	KET[79.9663]ES[79.9663]EAEDNLDDLEK	K	H	870	885	16	2,3	3T(79.9663),5S(79.9663)	sp|Q8IYB3|SRRM1_HUMAN	Q8IYB3	SRRM1_HUMAN	SRRM1	Serine/arginine repetitive matrix protein 1		sp|Q8IYB3-2|SRRM1_HUMAN	7	2.377599E7	MS/MS	STY:79.9663@KET(1.0000)ES(1.0000)EAEDNLDDLEK;
KETPPPLVPPAAR	KET[79.9663]PPPLVPPAAR	R	E	3	15	13	2	3T(79.9663)	sp|Q9BQA1-2|MEP50_HUMAN	Q9BQA1-2	MEP50_HUMAN	WDR77	Isoform 2 of Methylosome protein WDR77		sp|Q9BQA1|MEP50_HUMAN	2	3863765	MS/MS	STY:79.9663@KET(1.0000)PPPLVPPAAR;
KETQSPEQVK	KET[79.9663]QSPEQVK	K	S	490	499	10	2	3T(79.9663)	sp|Q9NYF8-2|BCLF1_HUMAN	Q9NYF8-2	BCLF1_HUMAN	BCLAF1	Isoform 2 of Bcl-2-associated transcription factor 1		sp|Q9NYF8-3|BCLF1_HUMAN, sp|Q9NYF8|BCLF1_HUMAN	2	8761012	MS/MS	STY:79.9663@KET(0.5000)QS(0.5000)PEQVK;
KFDHESSPGTDEDK	KFDHES[79.9663]S[79.9663]PGT[79.9663]DEDK	K	S	739	752	14	2,3	10T(79.9663),6S(79.9663),7S(79.9663)	sp|Q13427|PPIG_HUMAN	Q13427	PPIG_HUMAN	PPIG	Peptidyl-prolyl cis-trans isomerase G			2	3.44746e+06	MS/MS	STY:79.9663@KFDHES(1.0000)S(1.0000)PGT(1.0000)DEDK;
KGAGDGSDEEVDGK	KGAGDGS[79.9663]DEEVDGK	R	A	1937	1950	14	2,3	7S(79.9663)	sp|P35579|MYH9_HUMAN	P35579	MYH9_HUMAN	MYH9	Myosin-9		sp|P35579-2|MYH9_HUMAN	9	4.5109896E7	MS/MS	STY:79.9663@KGAGDGS(1.0000)DEEVDGK;
KGAGDGSDEEVDGKADGAEAK	KGAGDGS[79.9663]DEEVDGKADGAEAK	R	P	1937	1957	21	3	7S(79.9663)	sp|P35579|MYH9_HUMAN	P35579	MYH9_HUMAN	MYH9	Myosin-9		sp|P35579-2|MYH9_HUMAN	4	3.5915e+06	MS/MS	STY:79.9663@KGAGDGS(1.0000)DEEVDGKADGAEAK;
KGDVEGSQSQDEGEGSGESER	KGDVEGS[79.9663]QSQDEGEGSGESER	K	G	1059	1079	21	3	7S(79.9663)	sp|Q9UQE7|SMC3_HUMAN	Q9UQE7	SMC3_HUMAN	SMC3	Structural maintenance of chromosomes protein 3			1	1.01277e+06	MS/MS	STY:79.9663@KGDVEGS(0.4670)QS(0.4670)QDEGEGS(0.0330)GES(0.0330)ER;
KGELMENDQDAMEYSSEEEEVDLQTALTGYQTK	KGELMENDQDAMEY[79.9663]S[79.9663]SEEEEVDLQTALTGYQTK	K	Q	281	313	33	3	14Y(79.9663),15S(79.9663)	sp|Q7L014|DDX46_HUMAN	Q7L014	DDX46_HUMAN	DDX46	Probable ATP-dependent RNA helicase DDX46			2	0	MS/MS	STY:79.9663@KGELMENDQDAMEY(0.3099)S(0.3099)S(0.3099)EEEEVDLQT(0.2764)ALT(0.2764)GY(0.2408)QT(0.2767)K;
KGELMENDQDAMEYSSEEEEVDLQTALTGYQTK	KGELMENDQDAM[15.9949]EY[79.9663]S[79.9663]SEEEEVDLQTALTGYQTK	K	Q	281	313	33	3	12M(15.9949),14Y(79.9663),15S(79.9663)	sp|Q7L014|DDX46_HUMAN	Q7L014	DDX46_HUMAN	DDX46	Probable ATP-dependent RNA helicase DDX46			1	0	MS/MS	STY:79.9663@KGELMENDQDAMEY(0.2857)S(0.2857)S(0.2857)EEEEVDLQT(0.2857)ALT(0.2857)GY(0.2857)QT(0.2857)K;M:15.9949@KGELM(0.3616)ENDQDAM(0.6384)EYSSEEEEVDLQTALTGYQTK;
KGGEFDEFVNDDTDDDLPISK	KGGEFDEFVNDDT[79.9663]DDDLPISK	K	K	913	933	21	3	13T(79.9663)	sp|Q6PD62|CTR9_HUMAN	Q6PD62	CTR9_HUMAN	CTR9	RNA polymerase-associated protein CTR9 homolog			2	2.07171e+06	MS/MS	STY:79.9663@KGGEFDEFVNDDT(0.9048)DDDLPIS(0.0952)K;
KGSITEYTAAEEK	KGSITEYT[79.9663]AAEEK	R	E	174	186	13	2	8T(79.9663)	sp|Q12982-2|BNIP2_HUMAN	Q12982-2	BNIP2_HUMAN	BNIP2	Isoform 2 of BCL2/adenovirus E1B 19 kDa protein-interacting protein 2		sp|Q12982|BNIP2_HUMAN	1	3.27755e+06	MS/MS	STY:79.9663@KGS(0.0807)IT(0.0807)EY(0.2159)T(0.6227)AAEEK;
KGSGSEQEGEDEEGGER	KGS[79.9663]GS[79.9663]EQEGEDEEGGER	R	K	939	955	17	2	3S(79.9663),5S(79.9663)	sp|Q6PD62|CTR9_HUMAN	Q6PD62	CTR9_HUMAN	CTR9	RNA polymerase-associated protein CTR9 homolog			1	1.45084e+06	MS/MS	STY:79.9663@KGS(1.0000)GS(1.0000)EQEGEDEEGGER;
KGSITEYTAAEEK	KGS[79.9663]ITEYTAAEEK	R	E	174	186	13	2	3S(79.9663)	sp|Q12982-2|BNIP2_HUMAN	Q12982-2	BNIP2_HUMAN	BNIP2	Isoform 2 of BCL2/adenovirus E1B 19 kDa protein-interacting protein 2		sp|Q12982|BNIP2_HUMAN	2	3.27755e+06	MS/MS	STY:79.9663@KGS(0.3157)IT(0.3157)EY(0.3157)T(0.0528)AAEEK;
KHSPSPPPPTPTESR	KHS[79.9663]PS[79.9663]PPPPTPTESR	R	K	326	340	15	3	3S(79.9663),5S(79.9663)	sp|Q92922|SMRC1_HUMAN	Q92922	SMRC1_HUMAN	SMARCC1	SWI/SNF complex subunit SMARCC1			4	5.08762e+06	MS/MS	STY:79.9663@KHS(0.9408)PS(0.9408)PPPPT(0.0395)PT(0.0395)ES(0.0394)R;
KIPEPSPVTR	KIPEPS[79.9663]PVTR	K	R	1221	1230	10	2	6S(79.9663)	sp|Q7Z4S6-2|KI21A_HUMAN	Q7Z4S6-2	KI21A_HUMAN	KIF21A	Isoform 2 of Kinesin-like protein KIF21A		sp|Q7Z4S6-3|KI21A_HUMAN, sp|Q7Z4S6-4|KI21A_HUMAN, sp|Q7Z4S6-5|KI21A_HUMAN, sp|Q7Z4S6-6|KI21A_HUMAN, sp|Q7Z4S6|KI21A_HUMAN	1	1.73647e+06	MS/MS	STY:79.9663@KIPEPS(0.5000)PVT(0.5000)R;
KKEPAITSQNSPEAR	KKEPAIT[79.9663]SQNSPEAR	K	E	69	83	15	3	7T(79.9663)	sp|P23193-2|TCEA1_HUMAN	P23193-2	TCEA1_HUMAN	TCEA1	Isoform 2 of Transcription elongation factor A protein 1		sp|P23193|TCEA1_HUMAN	2	3.547e+06	MS/MS	STY:79.9663@KKEPAIT(0.3333)S(0.3333)QNS(0.3333)PEAR;
KKPDSPPK	KKPDS[79.9663]PPK	K	V	713	720	8	2	5S(79.9663)	sp|Q96T23-2|RSF1_HUMAN	Q96T23-2	RSF1_HUMAN	RSF1	Isoform 2 of Remodeling and spacing factor 1		sp|Q96T23-3|RSF1_HUMAN, sp|Q96T23|RSF1_HUMAN	1	0	MS/MS	STY:79.9663@KKPDS(1.0000)PPK;
KLGAGEGGEASVSPEK	KLGAGEGGEASVS[79.9663]PEK	K	T	1289	1304	16	2	13S(79.9663)	sp|Q13428-2|TCOF_HUMAN	Q13428-2	TCOF_HUMAN	TCOF1	Isoform 2 of Treacle protein		sp|Q13428-3|TCOF_HUMAN, sp|Q13428-4|TCOF_HUMAN, sp|Q13428-6|TCOF_HUMAN, sp|Q13428-7|TCOF_HUMAN, sp|Q13428-8|TCOF_HUMAN, sp|Q13428|TCOF_HUMAN	1	3000247	MS/MS	STY:79.9663@KLGAGEGGEAS(0.3142)VS(0.6858)PEK;
KLGAGEGGEASVSPEK	KLGAGEGGEAS[79.9663]VSPEK	K	T	1289	1304	16	2	11S(79.9663)	sp|Q13428-2|TCOF_HUMAN	Q13428-2	TCOF_HUMAN	TCOF1	Isoform 2 of Treacle protein		sp|Q13428-3|TCOF_HUMAN, sp|Q13428-4|TCOF_HUMAN, sp|Q13428-6|TCOF_HUMAN, sp|Q13428-7|TCOF_HUMAN, sp|Q13428-8|TCOF_HUMAN, sp|Q13428|TCOF_HUMAN	4	7.14582e+06	MS/MS	STY:79.9663@KLGAGEGGEAS(0.5000)VS(0.5000)PEK;
KLSSSDAPAQDTGSSAAAVETDASR	KLSSSDAPAQDTGSSAAAVETDAS[79.9663]R	R	T	838	862	25	3	24S(79.9663)	sp|Q7Z4S6-2|KI21A_HUMAN	Q7Z4S6-2	KI21A_HUMAN	KIF21A	Isoform 2 of Kinesin-like protein KIF21A		sp|Q7Z4S6-3|KI21A_HUMAN, sp|Q7Z4S6-4|KI21A_HUMAN, sp|Q7Z4S6-5|KI21A_HUMAN, sp|Q7Z4S6-6|KI21A_HUMAN, sp|Q7Z4S6|KI21A_HUMAN	1	1.99186e+06	MS/MS	STY:79.9663@KLS(0.0218)S(0.0218)S(0.0218)DAPAQDT(0.0416)GS(0.0416)S(0.0416)AAAVET(0.0765)DAS(0.7332)R;
KLSSSDAPAQDTGSSAAAVETDASR	KLSSSDAPAQDTGSSAAAVET[79.9663]DASR	R	T	838	862	25	3	21T(79.9663)	sp|Q7Z4S6-2|KI21A_HUMAN	Q7Z4S6-2	KI21A_HUMAN	KIF21A	Isoform 2 of Kinesin-like protein KIF21A		sp|Q7Z4S6-3|KI21A_HUMAN, sp|Q7Z4S6-4|KI21A_HUMAN, sp|Q7Z4S6-5|KI21A_HUMAN, sp|Q7Z4S6-6|KI21A_HUMAN, sp|Q7Z4S6|KI21A_HUMAN	1	1.99186e+06	MS/MS	STY:79.9663@KLS(0.0315)S(0.0315)S(0.0315)DAPAQDT(0.0315)GS(0.0315)S(0.0315)AAAVET(0.4056)DAS(0.4056)R;
KLSPTEPK	KLS[79.9663]PTEPK	R	N	48	55	8	2	3S(79.9663)	sp|O14828-2|SCAM3_HUMAN	O14828-2	SCAM3_HUMAN	SCAMP3	Isoform 2 of Secretory carrier-associated membrane protein 3		sp|O14828|SCAM3_HUMAN	1	1.49e+06	MS/MS	STY:79.9663@KLS(0.9236)PT(0.0764)EPK;
KLSRSPSPR	KLS[79.9663]RS[79.9663]PS[79.9663]PR	R	R	364	372	9	2	3S(79.9663),5S(79.9663),7S(79.9663)	sp|Q05519-2|SRS11_HUMAN	Q05519-2	SRS11_HUMAN	SRSF11	Isoform 2 of Serine/arginine-rich splicing factor 11		sp|Q05519|SRS11_HUMAN	2	4440460	MS/MS	STY:79.9663@KLS(1.0000)RS(1.0000)PS(1.0000)PR;
KLSSSSEPYEEDEFNDDQSIK	KLS[79.9663]S[79.9663]SSEPYEEDEFNDDQSIK	R	K	209	229	21	3	3S(79.9663),4S(79.9663)	sp|Q9H4L7-2|SMRCD_HUMAN	Q9H4L7-2	SMRCD_HUMAN	SMARCAD1	Isoform 2 of SWI/SNF-related matrix-associated actin-dependent regulator of chromatin subfamily A containing DEAD/H box 1		sp|Q9H4L7|SMRCD_HUMAN	2	1.91073e+06	MS/MS	STY:79.9663@KLS(0.4390)S(0.4390)S(0.4390)S(0.4390)EPY(0.2122)EEDEFNDDQS(0.0319)IK;
KLSSSSEPYEEDEFNDDQSIK	KLS[79.9663]S[79.9663]SSEPY[79.9663]EEDEFNDDQSIK	R	K	209	229	21	3	3S(79.9663),4S(79.9663),9Y(79.9663)	sp|Q9H4L7-2|SMRCD_HUMAN	Q9H4L7-2	SMRCD_HUMAN	SMARCAD1	Isoform 2 of SWI/SNF-related matrix-associated actin-dependent regulator of chromatin subfamily A containing DEAD/H box 1		sp|Q9H4L7|SMRCD_HUMAN	1	1.0361989E7	MS/MS	STY:79.9663@KLS(0.8845)S(0.8845)S(0.1303)S(0.1303)EPY(0.8931)EEDEFNDDQS(0.0773)IK;
KLSSSSEPYEEDEFNDDQSIK	KLS[79.9663]S[79.9663]SS[79.9663]EPYEEDEFNDDQSIK	R	K	209	229	21	3	3S(79.9663),4S(79.9663),6S(79.9663)	sp|Q9H4L7-2|SMRCD_HUMAN	Q9H4L7-2	SMRCD_HUMAN	SMARCAD1	Isoform 2 of SWI/SNF-related matrix-associated actin-dependent regulator of chromatin subfamily A containing DEAD/H box 1		sp|Q9H4L7|SMRCD_HUMAN	1	4893804	MS/MS	STY:79.9663@KLS(0.5947)S(0.5947)S(0.5947)S(0.6368)EPY(0.2896)EEDEFNDDQS(0.2896)IK;
KLSSSSEPYEEDEFNDDQSIK	KLS[79.9663]S[79.9663]S[79.9663]SEPYEEDEFNDDQSIK	R	K	209	229	21	3	3S(79.9663),4S(79.9663),5S(79.9663)	sp|Q9H4L7-2|SMRCD_HUMAN	Q9H4L7-2	SMRCD_HUMAN	SMARCAD1	Isoform 2 of SWI/SNF-related matrix-associated actin-dependent regulator of chromatin subfamily A containing DEAD/H box 1		sp|Q9H4L7|SMRCD_HUMAN	5	1.5277841E7	MS/MS	STY:79.9663@KLS(0.7180)S(0.7180)S(0.7180)S(0.7180)EPY(0.0707)EEDEFNDDQS(0.0571)IK;
KLSVPTSDEEDEVPAPK	KLS[79.9663]VPT[79.9663]S[79.9663]DEEDEVPAPK	K	P	103	119	17	2,3	3S(79.9663),6T(79.9663),7S(79.9663)	sp|Q8NE71|ABCF1_HUMAN	Q8NE71	ABCF1_HUMAN	ABCF1	ATP-binding cassette sub-family F member 1		sp|Q8NE71-2|ABCF1_HUMAN	13	5.7584756E7	MS/MS	STY:79.9663@KLS(1.0000)VPT(1.0000)S(1.0000)DEEDEVPAPK;
KLTSDEEGEPSGK	KLT[79.9663]SDEEGEPSGK	K	R	567	579	13	2	3T(79.9663)	sp|Q8WVC0-2|LEO1_HUMAN	Q8WVC0-2	LEO1_HUMAN	LEO1	Isoform 2 of RNA polymerase-associated protein LEO1		sp|Q8WVC0|LEO1_HUMAN	5	6825212	MS/MS	STY:79.9663@KLT(0.4847)S(0.4847)DEEGEPS(0.0306)GK;
KLTSDEEGEPSGK	KLT[79.9663]SDEEGEPS[79.9663]GK	K	R	567	579	13	2	11S(79.9663),3T(79.9663)	sp|Q8WVC0-2|LEO1_HUMAN	Q8WVC0-2	LEO1_HUMAN	LEO1	Isoform 2 of RNA polymerase-associated protein LEO1		sp|Q8WVC0|LEO1_HUMAN	1	769976	MS/MS	STY:79.9663@KLT(0.6584)S(0.6584)DEEGEPS(0.6831)GK;
KMSQPGSPSPK	KMS[79.9663]QPGS[79.9663]PSPK	K	T	1557	1567	11	2	3S(79.9663),7S(79.9663)	sp|Q14839-2|CHD4_HUMAN	Q14839-2	CHD4_HUMAN	CHD4	Isoform 2 of Chromodomain-helicase-DNA-binding protein 4		sp|Q14839|CHD4_HUMAN	1	1.75313e+06	MS/MS	STY:79.9663@KMS(0.6847)QPGS(0.6577)PS(0.6577)PK;
KPATPAEDDEDDDIDLFGSDNEEEDK	KPATPAEDDEDDDIDLFGS[79.9663]DNEEEDK	K	E	510	535	26	3	19S(79.9663)	sp|P29692-2|EF1D_HUMAN	P29692-2	EF1D_HUMAN	EEF1D	Isoform 2 of Elongation factor 1-delta		sp|P29692-3|EF1D_HUMAN, sp|P29692-4|EF1D_HUMAN, sp|P29692|EF1D_HUMAN	14	3.03522688E8	MS/MS	STY:79.9663@KPAT(0.0613)PAEDDEDDDIDLFGS(0.9387)DNEEEDK;
KPATPAEDDEDDDIDLFGSDNEEEDK	KPAT[79.9663]PAEDDEDDDIDLFGSDNEEEDK	K	E	510	535	26	3	4T(79.9663)	sp|P29692-2|EF1D_HUMAN	P29692-2	EF1D_HUMAN	EEF1D	Isoform 2 of Elongation factor 1-delta		sp|P29692-3|EF1D_HUMAN, sp|P29692-4|EF1D_HUMAN, sp|P29692|EF1D_HUMAN	6	2.90872512E8	MS/MS	STY:79.9663@KPAT(0.9052)PAEDDEDDDIDLFGS(0.0948)DNEEEDK;
KPATPAEDDEDDDIDLFGSDNEEEDK	KPAT[79.9663]PAEDDEDDDIDLFGS[79.9663]DNEEEDK	K	E	510	535	26	3	19S(79.9663),4T(79.9663)	sp|P29692-2|EF1D_HUMAN	P29692-2	EF1D_HUMAN	EEF1D	Isoform 2 of Elongation factor 1-delta		sp|P29692-3|EF1D_HUMAN, sp|P29692-4|EF1D_HUMAN, sp|P29692|EF1D_HUMAN	13	8.3741928E7	MS/MS	STY:79.9663@KPAT(1.0000)PAEDDEDDDIDLFGS(1.0000)DNEEEDK;
KPEDVLDDDDAGSAPLK	KPEDVLDDDDAGS[79.9663]APLK	R	S	141	157	17	3	13S(79.9663)	sp|P35613-3|BASI_HUMAN	P35613-3	BASI_HUMAN	BSG	Isoform 3 of Basigin		sp|P35613-2|BASI_HUMAN, sp|P35613-4|BASI_HUMAN, sp|P35613|BASI_HUMAN	1	0	MS/MS	STY:79.9663@KPEDVLDDDDAGS(1.0000)APLK;
KPEEESPRK	KPEEES[79.9663]PRK	R	D	723	731	9	3	6S(79.9663)	sp|P49321-3|NASP_HUMAN	P49321-3	NASP_HUMAN	NASP	Isoform 3 of Nuclear autoantigenic sperm protein		sp|P49321-2|NASP_HUMAN, sp|P49321-4|NASP_HUMAN, sp|P49321|NASP_HUMAN	1	948045	MS/MS	STY:79.9663@KPEEES(1.0000)PRK;
KPIETGSPK	KPIET[79.9663]GSPK	K	T	442	450	9	2	5T(79.9663)	sp|Q05519-2|SRS11_HUMAN	Q05519-2	SRS11_HUMAN	SRSF11	Isoform 2 of Serine/arginine-rich splicing factor 11		sp|Q05519|SRS11_HUMAN	4	2.02338E7	MS/MS	STY:79.9663@KPIET(0.8771)GS(0.1229)PK;
KPPAPPSPVQSQSPSTNWSPAVPVK	KPPAPPSPVQSQSPST[79.9663]NWS[79.9663]PAVPVK	K	K	763	787	25	3	16T(79.9663),19S(79.9663)	sp|Q8IYB3|SRRM1_HUMAN	Q8IYB3	SRRM1_HUMAN	SRRM1	Serine/arginine repetitive matrix protein 1		sp|Q8IYB3-2|SRRM1_HUMAN	1	0	MS/MS	STY:79.9663@KPPAPPS(0.0677)PVQS(0.0969)QS(0.0969)PS(0.0969)T(0.8208)NWS(0.8208)PAVPVK;
KPPAPPSPVQSQSPSTNWSPAVPVK	KPPAPPSPVQSQSPS[79.9663]T[79.9663]NWS[79.9663]PAVPVK	K	K	763	787	25	3	15S(79.9663),16T(79.9663),19S(79.9663)	sp|Q8IYB3|SRRM1_HUMAN	Q8IYB3	SRRM1_HUMAN	SRRM1	Serine/arginine repetitive matrix protein 1		sp|Q8IYB3-2|SRRM1_HUMAN	1	0	MS/MS	STY:79.9663@KPPAPPS(0.3310)PVQS(0.2622)QS(0.0849)PS(0.7739)T(0.7739)NWS(0.7739)PAVPVK;
KPPAPPSPVQSQSPSTNWSPAVPVK	KPPAPPSPVQSQS[79.9663]PSTNWS[79.9663]PAVPVK	K	K	763	787	25	3	13S(79.9663),19S(79.9663)	sp|Q8IYB3|SRRM1_HUMAN	Q8IYB3	SRRM1_HUMAN	SRRM1	Serine/arginine repetitive matrix protein 1		sp|Q8IYB3-2|SRRM1_HUMAN	1	1.737842E7	MS/MS	STY:79.9663@KPPAPPS(0.0662)PVQS(0.1571)QS(0.7176)PS(0.1712)T(0.1712)NWS(0.7167)PAVPVK;
KPPAPPSPVQSQSPSTNWSPAVPVK	KPPAPPSPVQSQS[79.9663]PS[79.9663]T[79.9663]NWSPAVPVK	K	K	763	787	25	3	13S(79.9663),15S(79.9663),16T(79.9663)	sp|Q8IYB3|SRRM1_HUMAN	Q8IYB3	SRRM1_HUMAN	SRRM1	Serine/arginine repetitive matrix protein 1		sp|Q8IYB3-2|SRRM1_HUMAN	1	2.1861332E7	MS/MS	STY:79.9663@KPPAPPS(0.1850)PVQS(0.1850)QS(0.6815)PS(0.6815)T(0.6335)NWS(0.6335)PAVPVK;
KPPAPPSPVQSQSPSTNWSPAVPVK	KPPAPPSPVQS[79.9663]QS[79.9663]PSTNWSPAVPVK	K	K	763	787	25	3	11S(79.9663),13S(79.9663)	sp|Q8IYB3|SRRM1_HUMAN	Q8IYB3	SRRM1_HUMAN	SRRM1	Serine/arginine repetitive matrix protein 1		sp|Q8IYB3-2|SRRM1_HUMAN	3	1.737842E7	MS/MS	STY:79.9663@KPPAPPS(0.3705)PVQS(0.7395)QS(0.7395)PS(0.0330)T(0.0330)NWS(0.0845)PAVPVK;
KPPAPPSPVQSQSPSTNWSPAVPVK	KPPAPPS[79.9663]PVQSQSPSTNWSPAVPVK	K	K	763	787	25	3	7S(79.9663)	sp|Q8IYB3|SRRM1_HUMAN	Q8IYB3	SRRM1_HUMAN	SRRM1	Serine/arginine repetitive matrix protein 1		sp|Q8IYB3-2|SRRM1_HUMAN	1	2.49153e+06	MS/MS	STY:79.9663@KPPAPPS(0.2235)PVQS(0.2235)QS(0.2235)PS(0.2235)T(0.0530)NWS(0.0530)PAVPVK;
KPPAPPSPVQSQSPSTNWSPAVPVK	KPPAPPS[79.9663]PVQSQS[79.9663]PSTNWSPAVPVK	K	K	763	787	25	3	13S(79.9663),7S(79.9663)	sp|Q8IYB3|SRRM1_HUMAN	Q8IYB3	SRRM1_HUMAN	SRRM1	Serine/arginine repetitive matrix protein 1		sp|Q8IYB3-2|SRRM1_HUMAN	2	1.737842E7	MS/MS	STY:79.9663@KPPAPPS(0.9207)PVQS(0.0517)QS(0.9202)PS(0.0358)T(0.0358)NWS(0.0358)PAVPVK;
KPPAPPSPVQSQSPSTNWSPAVPVK	KPPAPPS[79.9663]PVQSQS[79.9663]PS[79.9663]TNWSPAVPVK	K	K	763	787	25	3	13S(79.9663),15S(79.9663),7S(79.9663)	sp|Q8IYB3|SRRM1_HUMAN	Q8IYB3	SRRM1_HUMAN	SRRM1	Serine/arginine repetitive matrix protein 1		sp|Q8IYB3-2|SRRM1_HUMAN	1	0	MS/MS	STY:79.9663@KPPAPPS(0.5557)PVQS(0.3784)QS(0.5165)PS(0.5165)T(0.5165)NWS(0.5165)PAVPVK;
KPPAPPSPVQSQSPSTNWSPAVPVK	KPPAPPS[79.9663]PVQS[79.9663]QSPSTNWSPAVPVK	K	K	763	787	25	3	11S(79.9663),7S(79.9663)	sp|Q8IYB3|SRRM1_HUMAN	Q8IYB3	SRRM1_HUMAN	SRRM1	Serine/arginine repetitive matrix protein 1		sp|Q8IYB3-2|SRRM1_HUMAN	3	0	MS/MS	STY:79.9663@KPPAPPS(0.4540)PVQS(0.4072)QS(0.4072)PS(0.4072)T(0.0666)NWS(0.2579)PAVPVK;
KPPAPPSPVQSQSPSTNWSPAVPVK	KPPAPPS[79.9663]PVQS[79.9663]QSPSTNWS[79.9663]PAVPVK	K	K	763	787	25	3	11S(79.9663),19S(79.9663),7S(79.9663)	sp|Q8IYB3|SRRM1_HUMAN	Q8IYB3	SRRM1_HUMAN	SRRM1	Serine/arginine repetitive matrix protein 1		sp|Q8IYB3-2|SRRM1_HUMAN	1	0	MS/MS	STY:79.9663@KPPAPPS(0.5243)PVQS(0.4885)QS(0.4885)PS(0.4885)T(0.4885)NWS(0.5217)PAVPVK;
KPPAPPSPVQSQSPSTNWSPAVPVK	KPPAPPS[79.9663]PVQS[79.9663]QS[79.9663]PSTNWSPAVPVK	K	K	763	787	25	3	11S(79.9663),13S(79.9663),7S(79.9663)	sp|Q8IYB3|SRRM1_HUMAN	Q8IYB3	SRRM1_HUMAN	SRRM1	Serine/arginine repetitive matrix protein 1		sp|Q8IYB3-2|SRRM1_HUMAN	3	2.1861332E7	MS/MS	STY:79.9663@KPPAPPS(0.8356)PVQS(0.8324)QS(0.8324)PS(0.1871)T(0.1871)NWS(0.1253)PAVPVK;
KPSPQPSSPR	KPS[79.9663]PQPSSPR	K	Q	322	331	10	2	3S(79.9663)	sp|O75909-1|CCNK_HUMAN	O75909-1	CCNK_HUMAN	CCNK	Isoform 3 of Cyclin-K		sp|O75909-4|CCNK_HUMAN, sp|O75909|CCNK_HUMAN	1	2054863	MS/MS	STY:79.9663@KPS(0.3333)PQPS(0.3333)S(0.3333)PR;
KPSPQPSSPR	KPS[79.9663]PQPS[79.9663]SPR	K	Q	322	331	10	2	3S(79.9663),7S(79.9663)	sp|O75909-1|CCNK_HUMAN	O75909-1	CCNK_HUMAN	CCNK	Isoform 3 of Cyclin-K		sp|O75909-4|CCNK_HUMAN, sp|O75909|CCNK_HUMAN	1	0	MS/MS	STY:79.9663@KPS(0.6667)PQPS(0.6667)S(0.6667)PR;
KPSTSDDSDSNFEK	KPS[79.9663]TSDDS[79.9663]DS[79.9663]NFEK	R	I	1493	1506	14	2	10S(79.9663),3S(79.9663),8S(79.9663)	sp|P11388-2|TOP2A_HUMAN	P11388-2	TOP2A_HUMAN	TOP2A	Isoform 2 of DNA topoisomerase 2-alpha		sp|P11388-3|TOP2A_HUMAN, sp|P11388-4|TOP2A_HUMAN, sp|P11388|TOP2A_HUMAN	1	0	MS/MS	STY:79.9663@KPS(0.5878)T(0.5878)S(0.5878)DDS(0.6183)DS(0.6183)NFEK;
KPSTSDDSDSNFEK	KPS[79.9663]T[79.9663]S[79.9663]DDSDSNFEK	R	I	1493	1506	14	2	3S(79.9663),4T(79.9663),5S(79.9663)	sp|P11388-2|TOP2A_HUMAN	P11388-2	TOP2A_HUMAN	TOP2A	Isoform 2 of DNA topoisomerase 2-alpha		sp|P11388-3|TOP2A_HUMAN, sp|P11388-4|TOP2A_HUMAN, sp|P11388|TOP2A_HUMAN	3	9965375	MS/MS	STY:79.9663@KPS(0.6178)T(0.6178)S(0.5881)DDS(0.5881)DS(0.5881)NFEK;
KPVNYSQFDHSDSDDDFVSATVPLNK	KPVNYS[79.9663]QFDHS[79.9663]DSDDDFVSATVPLNK	K	K	9	34	26	3	11S(79.9663),6S(79.9663)	sp|Q96B01-2|R51A1_HUMAN	Q96B01-2	R51A1_HUMAN	RAD51AP1	Isoform 2 of RAD51-associated protein 1		sp|Q96B01-3|R51A1_HUMAN, sp|Q96B01|R51A1_HUMAN	1	4224462	MS/MS	STY:79.9663@KPVNY(0.1903)S(0.6222)QFDHS(0.5463)DS(0.5463)DDDFVS(0.0474)AT(0.0474)VPLNK;
KPVNYSQFDHSDSDDDFVSATVPLNK	KPVNY[79.9663]S[79.9663]QFDHSDSDDDFVSATVPLNK	K	K	9	34	26	3	5Y(79.9663),6S(79.9663)	sp|Q96B01-2|R51A1_HUMAN	Q96B01-2	R51A1_HUMAN	RAD51AP1	Isoform 2 of RAD51-associated protein 1		sp|Q96B01-3|R51A1_HUMAN, sp|Q96B01|R51A1_HUMAN	3	6674847	MS/MS	STY:79.9663@KPVNY(0.3867)S(0.3867)QFDHS(0.3867)DS(0.3867)DDDFVS(0.3867)AT(0.0665)VPLNK;
KPVTVSPTTPTSPTEGEAS	KPVTVSPTTPTSPT[79.9663]EGEAS	R	-	505	523	19	2	14T(79.9663)	sp|Q9Y6G9|DC1L1_HUMAN	Q9Y6G9	DC1L1_HUMAN	DYNC1LI1	Cytoplasmic dynein 1 light intermediate chain 1			1	1.168943E7	MS/MS	STY:79.9663@KPVT(0.0077)VS(0.0077)PT(0.0137)T(0.0591)PT(0.0591)S(0.1443)PT(0.3542)EGEAS(0.3542);
KPVTVSPTTPTSPTEGEAS	KPVTVSPTTPT[79.9663]SPTEGEAS	R	-	505	523	19	2	11T(79.9663)	sp|Q9Y6G9|DC1L1_HUMAN	Q9Y6G9	DC1L1_HUMAN	DYNC1LI1	Cytoplasmic dynein 1 light intermediate chain 1			1	1.168943E7	MS/MS	STY:79.9663@KPVT(0.0171)VS(0.0171)PT(0.0094)T(0.0128)PT(0.3956)S(0.3956)PT(0.0762)EGEAS(0.0762);
KPVTVSPTTPTSPTEGEAS	KPVT[79.9663]VSPTTPTSPTEGEAS	R	-	505	523	19	2	4T(79.9663)	sp|Q9Y6G9|DC1L1_HUMAN	Q9Y6G9	DC1L1_HUMAN	DYNC1LI1	Cytoplasmic dynein 1 light intermediate chain 1			2	1.168943E7	MS/MS	STY:79.9663@KPVT(0.1658)VS(0.1658)PT(0.1658)T(0.1658)PT(0.1658)S(0.1658)PT(0.0027)EGEAS(0.0027);
KQSFDDNDSEELEDK	KQS[79.9663]FDDNDS[79.9663]EELEDK	K	D	105	119	15	2	3S(79.9663),9S(79.9663)	sp|O60841|IF2P_HUMAN	O60841	IF2P_HUMAN	EIF5B	Eukaryotic translation initiation factor 5B			1	7817731	MS/MS	STY:79.9663@KQS(1.0000)FDDNDS(1.0000)EELEDK;
KRESESESDETPPAAPQLIK	KRESES[79.9663]ES[79.9663]DETPPAAPQLIK	R	K	448	467	20	3	6S(79.9663),8S(79.9663)	sp|O60832|DKC1_HUMAN	O60832	DKC1_HUMAN	DKC1	H/ACA ribonucleoprotein complex subunit DKC1			3	1.09853984E8	MS/MS	STY:79.9663@KRES(0.1227)ES(0.9097)ES(0.9097)DET(0.0579)PPAAPQLIK;
KRESESESDETPPAAPQLIK	KRESES[79.9663]ES[79.9663]DET[79.9663]PPAAPQLIK	R	K	448	467	20	3	11T(79.9663),6S(79.9663),8S(79.9663)	sp|O60832|DKC1_HUMAN	O60832	DKC1_HUMAN	DKC1	H/ACA ribonucleoprotein complex subunit DKC1			1	0	MS/MS	STY:79.9663@KRES(0.3127)ES(0.8958)ES(0.8958)DET(0.8958)PPAAPQLIK;
KRESESESDETPPAAPQLIK	KRES[79.9663]ESESDET[79.9663]PPAAPQLIK	R	K	448	467	20	3	11T(79.9663),4S(79.9663)	sp|O60832|DKC1_HUMAN	O60832	DKC1_HUMAN	DKC1	H/ACA ribonucleoprotein complex subunit DKC1			3	0	MS/MS	STY:79.9663@KRES(0.4911)ES(0.4911)ES(0.4911)DET(0.5266)PPAAPQLIK;
KRESESESDETPPAAPQLIK	KRES[79.9663]ESES[79.9663]DETPPAAPQLIK	R	K	448	467	20	3	4S(79.9663),8S(79.9663)	sp|O60832|DKC1_HUMAN	O60832	DKC1_HUMAN	DKC1	H/ACA ribonucleoprotein complex subunit DKC1			2	1.09853984E8	MS/MS	STY:79.9663@KRES(0.7070)ES(0.4067)ES(0.7108)DET(0.1755)PPAAPQLIK;
KRESESESDETPPAAPQLIK	KRES[79.9663]ES[79.9663]ESDETPPAAPQLIK	R	K	448	467	20	3	4S(79.9663),6S(79.9663)	sp|O60832|DKC1_HUMAN	O60832	DKC1_HUMAN	DKC1	H/ACA ribonucleoprotein complex subunit DKC1			21	1.09853984E8	MS/MS	STY:79.9663@KRES(0.8706)ES(0.8706)ES(0.1671)DET(0.0917)PPAAPQLIK;
KRESESESDETPPAAPQLIK	KRES[79.9663]ES[79.9663]ESDET[79.9663]PPAAPQLIK	R	K	448	467	20	3	11T(79.9663),4S(79.9663),6S(79.9663)	sp|O60832|DKC1_HUMAN	O60832	DKC1_HUMAN	DKC1	H/ACA ribonucleoprotein complex subunit DKC1			6	1.16292112E8	MS/MS	STY:79.9663@KRES(0.8905)ES(0.8905)ES(0.3292)DET(0.8899)PPAAPQLIK;
KRESESESDETPPAAPQLIK	KRES[79.9663]ES[79.9663]ES[79.9663]DETPPAAPQLIK	R	K	448	467	20	3	4S(79.9663),6S(79.9663),8S(79.9663)	sp|O60832|DKC1_HUMAN	O60832	DKC1_HUMAN	DKC1	H/ACA ribonucleoprotein complex subunit DKC1			21	1.16358144E8	MS/MS	STY:79.9663@KRES(0.9009)ES(0.9003)ES(0.9003)DET(0.2985)PPAAPQLIK;
KRETDDEGEDD	KRET[79.9663]DDEGEDD	R	-	241	251	11	2	4T(79.9663)	sp|Q92688|AN32B_HUMAN	Q92688	AN32B_HUMAN	ANP32B	Acidic leucine-rich nuclear phosphoprotein 32 family member B			6	1.4217676E7	MS/MS	STY:79.9663@KRET(1.0000)DDEGEDD;
KRSSSEDDDLDVESDFDDASINSYSVSDGSTSR	KRS[79.9663]S[79.9663]S[79.9663]EDDDLDVESDFDDASINSYSVSDGSTSR	R	S	306	338	33	3	3S(79.9663),4S(79.9663),5S(79.9663)	sp|Q14839-2|CHD4_HUMAN	Q14839-2	CHD4_HUMAN	CHD4	Isoform 2 of Chromodomain-helicase-DNA-binding protein 4		sp|Q14839|CHD4_HUMAN	1	0	MS/MS	STY:79.9663@KRS(0.6008)S(0.6008)S(0.6008)EDDDLDVES(0.2411)DFDDAS(0.2411)INS(0.0776)Y(0.0776)S(0.0776)VS(0.0912)DGS(0.1305)T(0.1305)S(0.1305)R;
KSPIINESR	KS[79.9663]PIINESR	K	S	276	284	9	2	2S(79.9663)	sp|Q13523|PRP4B_HUMAN	Q13523	PRP4B_HUMAN	PRPF4B	Serine/threonine-protein kinase PRP4 homolog			1	1.4461e+06	MS/MS	STY:79.9663@KS(0.9046)PIINES(0.0954)R;
KSPVGKSPPSTGSTYGSSQK	KS[79.9663]PVGKSPPSTGS[79.9663]TYGSSQK	K	E	314	333	20	3	13S(79.9663),2S(79.9663)	sp|Q9Y2W1|TR150_HUMAN	Q9Y2W1	TR150_HUMAN	THRAP3	Thyroid hormone receptor-associated protein 3			1	6.75475e+06	MS/MS	STY:79.9663@KS(0.3595)PVGKS(0.0688)PPS(0.0688)T(0.0688)GS(0.2868)T(0.2868)Y(0.2868)GS(0.2868)S(0.2868)QK;
KSPVGKSPPSTGSTYGSSQK	KS[79.9663]PVGKS[79.9663]PPSTGSTYGSSQK	K	E	314	333	20	3	2S(79.9663),7S(79.9663)	sp|Q9Y2W1|TR150_HUMAN	Q9Y2W1	TR150_HUMAN	THRAP3	Thyroid hormone receptor-associated protein 3			2	6.75475e+06	MS/MS	STY:79.9663@KS(0.8054)PVGKS(0.8054)PPS(0.0934)T(0.0934)GS(0.0405)T(0.0405)Y(0.0405)GS(0.0405)S(0.0405)QK;
KTSPASLDFPESQK	KTS[79.9663]PASLDFPESQK	R	S	457	470	14	2	3S(79.9663)	sp|Q96JM3|CHAP1_HUMAN	Q96JM3	CHAP1_HUMAN	CHAMP1	Chromosome alignment-maintaining phosphoprotein 1			1	1.78035e+06	MS/MS	STY:79.9663@KT(0.1283)S(0.4236)PAS(0.4236)LDFPES(0.0244)QK;
KTSPASLDFPESQK	KT[79.9663]SPASLDFPESQK	R	S	457	470	14	2	2T(79.9663)	sp|Q96JM3|CHAP1_HUMAN	Q96JM3	CHAP1_HUMAN	CHAMP1	Chromosome alignment-maintaining phosphoprotein 1			1	1.73147e+06	MS/MS	STY:79.9663@KT(0.2500)S(0.2500)PAS(0.2500)LDFPES(0.2500)QK;
KTSSDDESEEDEDDLLQR	KT[79.9663]SS[79.9663]DDES[79.9663]EEDEDDLLQR	R	T	203	220	18	2	2T(79.9663),4S(79.9663),8S(79.9663)	sp|Q9Y5J1|UTP18_HUMAN	Q9Y5J1	UTP18_HUMAN	UTP18	U3 small nucleolar RNA-associated protein 18 homolog			1	1.0222529E7	MS/MS	STY:79.9663@KT(0.7406)S(0.7406)S(0.7594)DDES(0.7594)EEDEDDLLQR;
KTSTSPPPEK	KT[79.9663]STSPPPEK	K	S	219	228	10	2	2T(79.9663)	sp|Q9H1E3|NUCKS_HUMAN	Q9H1E3	NUCKS_HUMAN	NUCKS1	Nuclear ubiquitous casein and cyclin-dependent kinase substrate 1		sp|Q9H1E3-2|NUCKS_HUMAN	2	7757583	MS/MS	STY:79.9663@KT(0.2500)S(0.2500)T(0.2500)S(0.2500)PPPEK;
KTSSDDESEEDEDDLLQR	KT[79.9663]S[79.9663]SDDES[79.9663]EEDEDDLLQR	R	T	203	220	18	2,3	2T(79.9663),3S(79.9663),8S(79.9663)	sp|Q9Y5J1|UTP18_HUMAN	Q9Y5J1	UTP18_HUMAN	UTP18	U3 small nucleolar RNA-associated protein 18 homolog			3	2.1356822E7	MS/MS	STY:79.9663@KT(0.7451)S(0.7451)S(0.7451)DDES(0.7647)EEDEDDLLQR;
KTSSDDESEEDEDDLLQR	KT[79.9663]S[79.9663]S[79.9663]DDESEEDEDDLLQR	R	T	203	220	18	2,3	2T(79.9663),3S(79.9663),4S(79.9663)	sp|Q9Y5J1|UTP18_HUMAN	Q9Y5J1	UTP18_HUMAN	UTP18	U3 small nucleolar RNA-associated protein 18 homolog			8	2.1208836E7	MS/MS	STY:79.9663@KT(0.8111)S(0.8111)S(0.8111)DDES(0.5668)EEDEDDLLQR;
KVDTTPNQGK	KVDT[79.9663]TPNQGK	K	K	271	280	10	2	4T(79.9663)	sp|Q9P2E9|RRBP1_HUMAN	Q9P2E9	RRBP1_HUMAN	RRBP1	Ribosome-binding protein 1			1	2.05878e+06	MS/MS	STY:79.9663@KVDT(0.5000)T(0.5000)PNQGK;
KVEEEQEADEEDVSEEEAESK	KVEEEQEADEEDVSEEEAES[79.9663]K	K	E	234	254	21	3	20S(79.9663)	sp|Q9H3N1|TMX1_HUMAN	Q9H3N1	TMX1_HUMAN	TMX1	Thioredoxin-related transmembrane protein 1			1	4.2710588E7	MS/MS	STY:79.9663@KVEEEQEADEEDVS(0.1458)EEEAES(0.8542)K;
KVEEEQEADEEDVSEEEAESK	KVEEEQEADEEDVS[79.9663]EEEAESK	K	E	234	254	21	2,3	14S(79.9663)	sp|Q9H3N1|TMX1_HUMAN	Q9H3N1	TMX1_HUMAN	TMX1	Thioredoxin-related transmembrane protein 1			12	5.0994504E7	MS/MS	STY:79.9663@KVEEEQEADEEDVS(0.9425)EEEAES(0.0575)K;
KVELSESEEDK	KVELS[79.9663]ES[79.9663]EEDK	R	G	459	469	11	2	5S(79.9663),7S(79.9663)	sp|Q8IYB3|SRRM1_HUMAN	Q8IYB3	SRRM1_HUMAN	SRRM1	Serine/arginine repetitive matrix protein 1		sp|Q8IYB3-2|SRRM1_HUMAN	3	2.8848738E7	MS/MS	STY:79.9663@KVELS(1.0000)ES(1.0000)EEDK;
KVMDSDEDDDY	KVMDS[79.9663]DEDDDY	R	-	115	125	11	2	5S(79.9663)	sp|O14737|PDCD5_HUMAN	O14737	PDCD5_HUMAN	PDCD5	Programmed cell death protein 5			4	1.79686e+06	MS/MS	STY:79.9663@KVMDS(0.7826)DEDDDY(0.2174);
KVSPESSPDQEETEINFTQK	KVS[79.9663]PESSPDQEET[79.9663]EINFT[79.9663]QK	R	L	409	428	20	3	13T(79.9663),18T(79.9663),3S(79.9663)	sp|Q8IYW5|RN168_HUMAN	Q8IYW5	RN168_HUMAN	RNF168	E3 ubiquitin-protein ligase RNF168			1	1.36608e+06	MS/MS	STY:79.9663@KVS(0.5971)PES(0.5971)S(0.5971)PDQEET(0.6043)EINFT(0.6043)QK;
KVSPESSPDQEETEINFTQK	KVS[79.9663]PES[79.9663]S[79.9663]PDQEETEINFTQK	R	L	409	428	20	3	3S(79.9663),6S(79.9663),7S(79.9663)	sp|Q8IYW5|RN168_HUMAN	Q8IYW5	RN168_HUMAN	RNF168	E3 ubiquitin-protein ligase RNF168			2	1.36608e+06	MS/MS	STY:79.9663@KVS(0.6000)PES(0.6000)S(0.6000)PDQEET(0.6000)EINFT(0.6000)QK;
KVVDYSQFQESDDADEDYGR	KVVDYSQFQESDDADEDY[79.9663]GR	R	D	9	28	20	3	18Y(79.9663)	sp|Q9H1E3|NUCKS_HUMAN	Q9H1E3	NUCKS_HUMAN	NUCKS1	Nuclear ubiquitous casein and cyclin-dependent kinase substrate 1			2	2.33602e+06	MS/MS	STY:79.9663@KVVDY(0.1900)S(0.1900)QFQES(0.1900)DDADEDY(0.4299)GR;
KVVVSPTK	KVVVSPT[79.9663]K	K	K	63	70	8	2	7T(79.9663)	sp|P19338|NUCL_HUMAN	P19338	NUCL_HUMAN	NCL	Nucleolin			2	7.22882e+06	MS/MS	STY:79.9663@KVVVS(0.0557)PT(0.9443)K;
KVVVSPTK	KVVVS[79.9663]PTK	K	K	63	70	8	2	5S(79.9663)	sp|P19338|NUCL_HUMAN	P19338	NUCL_HUMAN	NCL	Nucleolin			1	6.74228e+06	MS/MS	STY:79.9663@KVVVS(0.5000)PT(0.5000)K;
KWDGSEEDEDNSK	KWDGS[79.9663]EEDEDNSK	K	K	160	172	13	2	5S(79.9663)	sp|O60841|IF2P_HUMAN	O60841	IF2P_HUMAN	EIF5B	Eukaryotic translation initiation factor 5B			2	5.7797e+06	MS/MS	STY:79.9663@KWDGS(0.8186)EEDEDNS(0.1814)K;
KYVISDEEEEDDD	KY[79.9663]VISDEEEEDDD	K	-	594	606	13	2	2Y(79.9663)	sp|Q8WVC0-2|LEO1_HUMAN	Q8WVC0-2	LEO1_HUMAN	LEO1	Isoform 2 of RNA polymerase-associated protein LEO1		sp|Q8WVC0|LEO1_HUMAN	2	0	MS/MS	STY:79.9663@KY(0.5000)VIS(0.5000)DEEEEDDD;
LAPVPSPEPQKPAPVSPESVK	LAPVPSPEPQKPAPVS[79.9663]PES[79.9663]VK	K	A	199	219	21	3	16S(79.9663),19S(79.9663)	sp|Q96JM3|CHAP1_HUMAN	Q96JM3	CHAP1_HUMAN	CHAMP1	Chromosome alignment-maintaining phosphoprotein 1			1	4892970	MS/MS	STY:79.9663@LAPVPS(0.3777)PEPQKPAPVS(0.8112)PES(0.8112)VK;
LCCSVPTSPATTICSSDKFCRCGVCLPSTCPHTVWFLQPTCCCDNR	LC[57.0215]C[57.0215]SVPT[79.9663]S[79.9663]PATTIC[57.0215]SSDKFC[57.0215]RC[57.0215]GVC[57.0215]LPSTC[57.0215]PHTVWFLQPTC[57.0215]C[57.0215]C[57.0215]DNR	R	P	6	51	46	6	14C(57.0215),20C(57.0215),22C(57.0215),25C(57.0215),2C(57.0215),30C(57.0215),3C(57.0215),41C(57.0215),42C(57.0215),43C(57.0215),7T(79.9663),8S(79.9663)	sp|P02445|KRA34_SHEEP	P02445	KRA34_SHEEP		Keratin, high sulfur matrix protein, IIIB4			1	0	MS/MS	STY:79.9663@LCCS(0.0619)VPT(0.4226)S(0.4226)PAT(0.4226)T(0.4226)ICS(0.0467)S(0.0467)DKFCRCGVCLPS(0.0389)T(0.0345)CPHT(0.0279)VWFLQPT(0.0530)CCCDNR;
LDIDSPPITAR	LDIDSPPIT[79.9663]AR	R	N	33	43	11	2	9T(79.9663)	sp|P14618|KPYM_HUMAN	P14618	KPYM_HUMAN	PKM	Pyruvate kinase PKM		sp|P14618-2|KPYM_HUMAN	2	1.09871e+06	MS/MS	STY:79.9663@LDIDS(0.3202)PPIT(0.6798)AR;
LDQPVSAPPSPR	LDQPVS[79.9663]APPS[79.9663]PR	K	D	235	246	12	2	10S(79.9663),6S(79.9663)	sp|Q16204|CCDC6_HUMAN	Q16204	CCDC6_HUMAN	CCDC6	Coiled-coil domain-containing protein 6			2	9117588	MS/MS	STY:79.9663@LDQPVS(1.0000)APPS(1.0000)PR;
LDSQPQETSPELPR	LDSQPQET[79.9663]SPELPR	R	R	407	420	14	2	8T(79.9663)	sp|O14545|TRAD1_HUMAN	O14545	TRAD1_HUMAN	TRAFD1	TRAF-type zinc finger domain-containing protein 1			1	4.06913e+06	MS/MS	STY:79.9663@LDS(0.0193)QPQET(0.4903)S(0.4903)PELPR;
LDSQPQETSPELPR	LDS[79.9663]QPQETSPELPR	R	R	407	420	14	2	3S(79.9663)	sp|O14545|TRAD1_HUMAN	O14545	TRAD1_HUMAN	TRAFD1	TRAF-type zinc finger domain-containing protein 1			2	4.06913e+06	MS/MS	STY:79.9663@LDS(0.8693)QPQET(0.0653)S(0.0653)PELPR;
LDSSPSVSSTLAAK	LDS[79.9663]SPSVSSTLAAK	K	D	1148	1161	14	2	3S(79.9663)	sp|Q13428-2|TCOF_HUMAN	Q13428-2	TCOF_HUMAN	TCOF1	Isoform 2 of Treacle protein		sp|Q13428-3|TCOF_HUMAN, sp|Q13428-4|TCOF_HUMAN, sp|Q13428-6|TCOF_HUMAN, sp|Q13428-7|TCOF_HUMAN, sp|Q13428-8|TCOF_HUMAN, sp|Q13428|TCOF_HUMAN	2	3.36539e+06	MS/MS	STY:79.9663@LDS(0.4772)S(0.4772)PS(0.0114)VS(0.0114)S(0.0114)T(0.0114)LAAK;
LDSSEMDHSENEDYTMSSPLPGK	LDS[79.9663]S[79.9663]EMDHSENEDYTMSSPLPGK	R	K	1174	1196	23	3	3S(79.9663),4S(79.9663)	sp|Q9NTI5|PDS5B_HUMAN	Q9NTI5	PDS5B_HUMAN	PDS5B	Sister chromatid cohesion protein PDS5 homolog B		sp|Q9NTI5-2|PDS5B_HUMAN	1	2.2971e+06	MS/MS	STY:79.9663@LDS(0.4776)S(0.4776)EMDHS(0.4776)ENEDY(0.1418)T(0.1418)MS(0.1418)S(0.1418)PLPGK;
LDTGPQSLSGK	LDTGPQS[79.9663]LSGK	R	S	425	435	11	2	7S(79.9663)	sp|P35269|T2FA_HUMAN	P35269	T2FA_HUMAN	GTF2F1	General transcription factor IIF subunit 1			1	0	MS/MS	STY:79.9663@LDT(0.2239)GPQS(0.3880)LS(0.3880)GK;
LELQGPRGSPNAR	LELQGPRGS[79.9663]PNAR	R	S	555	567	13	2,3	9S(79.9663)	sp|P19338|NUCL_HUMAN	P19338	NUCL_HUMAN	NCL	Nucleolin			5	3.078064E7	MS/MS	STY:79.9663@LELQGPRGS(1.0000)PNAR;
LESLYSDEEDESAVGADK	LESLY[79.9663]SDEEDESAVGADK	R	I	962	979	18	2	5Y(79.9663)	sp|Q9UP95-2|S12A4_HUMAN	Q9UP95-2	S12A4_HUMAN	SLC12A4	Isoform 2 of Solute carrier family 12 member 4		sp|Q9UP95-3|S12A4_HUMAN, sp|Q9UP95-5|S12A4_HUMAN, sp|Q9UP95-6|S12A4_HUMAN, sp|Q9UP95-7|S12A4_HUMAN, sp|Q9UP95|S12A4_HUMAN	1	1.61974e+06	MS/MS	STY:79.9663@LES(0.0974)LY(0.4272)S(0.4272)DEEDES(0.0482)AVGADK;
LESIDGNEEESMK	LES[79.9663]IDGNEEESMK	K	E	755	767	13	2	3S(79.9663)	sp|Q8TEQ6|GEMI5_HUMAN	Q8TEQ6	GEMI5_HUMAN	GEMIN5	Gem-associated protein 5			3	0	MS/MS	STY:79.9663@LES(0.7854)IDGNEEES(0.2146)MK;
LFDEEEDSSEK	LFDEEEDS[79.9663]SEK	K	L	706	716	11	2	8S(79.9663)	sp|O43719|HTSF1_HUMAN	O43719	HTSF1_HUMAN	HTATSF1	HIV Tat-specific factor 1			1	2.13388e+06	MS/MS	STY:79.9663@LFDEEEDS(0.5000)S(0.5000)EK;
LFDEEEDSSEK	LFDEEEDS[79.9663]S[79.9663]EK	K	L	706	716	11	2	8S(79.9663),9S(79.9663)	sp|O43719|HTSF1_HUMAN	O43719	HTSF1_HUMAN	HTATSF1	HIV Tat-specific factor 1			3	1.721073E7	MS/MS	STY:79.9663@LFDEEEDS(1.0000)S(1.0000)EK;
LFEDDDSNEK	LFEDDDS[79.9663]NEK	K	L	696	705	10	2	7S(79.9663)	sp|O43719|HTSF1_HUMAN	O43719	HTSF1_HUMAN	HTATSF1	HIV Tat-specific factor 1			4	1.2575186E7	MS/MS	STY:79.9663@LFEDDDS(1.0000)NEK;
LGAGEGGEASVSPEK	LGAGEGGEASVS[79.9663]PEK	K	T	1290	1304	15	2	12S(79.9663)	sp|Q13428-2|TCOF_HUMAN	Q13428-2	TCOF_HUMAN	TCOF1	Isoform 2 of Treacle protein		sp|Q13428-3|TCOF_HUMAN, sp|Q13428-4|TCOF_HUMAN, sp|Q13428-6|TCOF_HUMAN, sp|Q13428-7|TCOF_HUMAN, sp|Q13428-8|TCOF_HUMAN, sp|Q13428|TCOF_HUMAN	1	1.0108766E7	MS/MS	STY:79.9663@LGAGEGGEAS(0.0718)VS(0.9282)PEK;
LGAGEGGEASVSPEK	LGAGEGGEAS[79.9663]VSPEK	K	T	1290	1304	15	2	10S(79.9663)	sp|Q13428-2|TCOF_HUMAN	Q13428-2	TCOF_HUMAN	TCOF1	Isoform 2 of Treacle protein		sp|Q13428-3|TCOF_HUMAN, sp|Q13428-4|TCOF_HUMAN, sp|Q13428-6|TCOF_HUMAN, sp|Q13428-7|TCOF_HUMAN, sp|Q13428-8|TCOF_HUMAN, sp|Q13428|TCOF_HUMAN	2	1.0152058E7	MS/MS	STY:79.9663@LGAGEGGEAS(0.5000)VS(0.5000)PEK;
LGAGGGSPEK	LGAGGGS[79.9663]PEK	R	S	13	22	10	2	7S(79.9663)	sp|Q9UNE7|CHIP_HUMAN	Q9UNE7	CHIP_HUMAN	STUB1	E3 ubiquitin-protein ligase CHIP			2	1.0831464E7	MS/MS	STY:79.9663@LGAGGGS(1.0000)PEK;
LGAPENSGISTLER	LGAPENSGIS[79.9663]TLER	R	G	14	27	14	2	10S(79.9663)	sp|Q9Y4F1-2|FARP1_HUMAN	Q9Y4F1-2	FARP1_HUMAN	FARP1	Isoform 2 of FERM, ARHGEF and pleckstrin domain-containing protein 1		sp|Q9Y4F1-3|FARP1_HUMAN, sp|Q9Y4F1|FARP1_HUMAN	1	1.92879e+06	MS/MS	STY:79.9663@LGAPENS(0.1415)GIS(0.4292)T(0.4292)LER;
LGAPENSGISTLER	LGAPENS[79.9663]GISTLER	R	G	14	27	14	2	7S(79.9663)	sp|Q9Y4F1-2|FARP1_HUMAN	Q9Y4F1-2	FARP1_HUMAN	FARP1	Isoform 2 of FERM, ARHGEF and pleckstrin domain-containing protein 1		sp|Q9Y4F1-3|FARP1_HUMAN, sp|Q9Y4F1|FARP1_HUMAN	1	2.60661e+06	MS/MS	STY:79.9663@LGAPENS(0.3333)GIS(0.3333)T(0.3333)LER;
LGASNSPGQPNSVK	LGASNS[79.9663]PGQPNSVK	K	R	672	685	14	2	6S(79.9663)	sp|P49756|RBM25_HUMAN	P49756	RBM25_HUMAN	RBM25	RNA-binding protein 25			1	0	MS/MS	STY:79.9663@LGAS(0.2381)NS(0.4590)PGQPNS(0.3028)VK;
LGASNSPGQPNSVK	LGAS[79.9663]NSPGQPNSVK	K	R	672	685	14	2	4S(79.9663)	sp|P49756|RBM25_HUMAN	P49756	RBM25_HUMAN	RBM25	RNA-binding protein 25			6	1.1174694E7	MS/MS	STY:79.9663@LGAS(0.7812)NS(0.1094)PGQPNS(0.1094)VK;
LGEASDSELADADK	LGEAS[79.9663]DSELADADK	R	A	1108	1121	14	2	5S(79.9663)	sp|Q5SW79|CE170_HUMAN	Q5SW79	CE170_HUMAN	CEP170	Centrosomal protein of 170 kDa		sp|Q5SW79-2|CE170_HUMAN, sp|Q5SW79-3|CE170_HUMAN	1	0	MS/MS	STY:79.9663@LGEAS(0.8936)DS(0.1064)ELADADK;
LGGDEDGYEEEEDENSRQSEDDDSETEKPEADDPK	LGGDEDGY[79.9663]EEEEDENSRQSEDDDS[79.9663]ETEKPEADDPK	R	D	54	88	35	3	24S(79.9663),8Y(79.9663)	sp|Q9UHR5|S30BP_HUMAN	Q9UHR5	S30BP_HUMAN	SAP30BP	SAP30-binding protein			1	4706931	MS/MS	STY:79.9663@LGGDEDGY(0.4892)EEEEDENS(0.1593)RQS(0.4219)EDDDS(0.4648)ET(0.4648)EKPEADDPK;
LGGDEDGYEEEEDENSRQSEDDDSETEKPEADDPK	LGGDEDGY[79.9663]EEEEDENS[79.9663]RQSEDDDSETEKPEADDPK	R	D	54	88	35	3	16S(79.9663),8Y(79.9663)	sp|Q9UHR5|S30BP_HUMAN	Q9UHR5	S30BP_HUMAN	SAP30BP	SAP30-binding protein			1	1.18429e+06	MS/MS	STY:79.9663@LGGDEDGY(0.4000)EEEEDENS(0.4000)RQS(0.4000)EDDDS(0.4000)ET(0.4000)EKPEADDPK;
LGGLRPESPESLTSVSR	LGGLRPESPES[79.9663]LTSVSR	R	T	11	27	17	2	11S(79.9663)	sp|Q9H6F5|CCD86_HUMAN	Q9H6F5	CCD86_HUMAN	CCDC86	Coiled-coil domain-containing protein 86			1	5323478	MS/MS	STY:79.9663@LGGLRPES(0.0267)PES(0.2433)LT(0.2433)S(0.2433)VS(0.2433)R;
LGHPEALSAGTGSPQPPSFTYAQQR	LGHPEALSAGT[79.9663]GSPQPPSFTYAQQR	K	E	139	163	25	3	11T(79.9663)	sp|Q15942-2|ZYX_HUMAN	Q15942-2	ZYX_HUMAN	ZYX	Isoform 2 of Zyxin		sp|Q15942|ZYX_HUMAN	1	1.18034e+06	MS/MS	STY:79.9663@LGHPEALS(0.0516)AGT(0.1897)GS(0.1897)PQPPS(0.1897)FT(0.1897)Y(0.1897)AQQR;
LGRETEEQDSDSAEQGDPAGEGK	LGRETEEQDS[79.9663]DSAEQGDPAGEGK	K	E	51	73	23	3	10S(79.9663)	sp|O95361|TRI16_HUMAN	O95361	TRI16_HUMAN	TRIM16	Tripartite motif-containing protein 16			2	5840541	MS/MS	STY:79.9663@LGRET(0.0246)EEQDS(0.4877)DS(0.4877)AEQGDPAGEGK;
LGRETEEQDSDSAEQGDPAGEGK	LGRET[79.9663]EEQDSDSAEQGDPAGEGK	K	E	51	73	23	3	5T(79.9663)	sp|O95361|TRI16_HUMAN	O95361	TRI16_HUMAN	TRIM16	Tripartite motif-containing protein 16			1	5840541	MS/MS	STY:79.9663@LGRET(0.3333)EEQDS(0.3333)DS(0.3333)AEQGDPAGEGK;
LGSGGSGDGPSVSWSR	LGS[79.9663]GGS[79.9663]GDGPSVSWSR	R	Q	191	206	16	2	3S(79.9663),6S(79.9663)	sp|Q9Y6R9-2|CCD61_HUMAN	Q9Y6R9-2	CCD61_HUMAN	CCDC61	Isoform 2 of Centrosomal protein CCDC61		sp|Q9Y6R9|CCD61_HUMAN	1	0	MS/MS	STY:79.9663@LGS(0.4000)GGS(0.4000)GDGPS(0.4000)VS(0.4000)WS(0.4000)R;
LGSVDSFER	LGS[79.9663]VDSFER	R	S	586	594	9	2	3S(79.9663)	sp|O60343-2|TBCD4_HUMAN	O60343-2	TBCD4_HUMAN	TBC1D4	Isoform 2 of TBC1 domain family member 4		sp|O60343-3|TBCD4_HUMAN, sp|O60343|TBCD4_HUMAN	1	1.00329e+06	MS/MS	STY:79.9663@LGS(0.9404)VDS(0.0596)FER;
LGSVDSFER	LGS[79.9663]VDS[79.9663]FER	R	S	586	594	9	2	3S(79.9663),6S(79.9663)	sp|O60343-2|TBCD4_HUMAN	O60343-2	TBCD4_HUMAN	TBC1D4	Isoform 2 of TBC1 domain family member 4		sp|O60343-3|TBCD4_HUMAN, sp|O60343|TBCD4_HUMAN	1	1.17882e+06	MS/MS	STY:79.9663@LGS(1.0000)VDS(1.0000)FER;
LGVSVSPSR	LGVS[79.9663]VSPSR	K	A	529	537	9	2	4S(79.9663)	sp|Q86VM9|ZCH18_HUMAN	Q86VM9	ZCH18_HUMAN	ZC3H18	Zinc finger CCCH domain-containing protein 18			1	2644857	MS/MS	STY:79.9663@LGVS(0.3333)VS(0.3333)PS(0.3333)R;
LGVSVSPSR	LGVS[79.9663]VS[79.9663]PSR	K	A	529	537	9	2	4S(79.9663),6S(79.9663)	sp|Q86VM9|ZCH18_HUMAN	Q86VM9	ZCH18_HUMAN	ZC3H18	Zinc finger CCCH domain-containing protein 18			1	1.6711e+06	MS/MS	STY:79.9663@LGVS(0.6667)VS(0.6667)PS(0.6667)R;
LHGGFDSDCSEDGEALNGEPELDLTSK	LHGGFDSDC[57.0215]SEDGEALNGEPELDLT[79.9663]S[79.9663]K	R	L	38	64	27	3	25T(79.9663),26S(79.9663),9C(57.0215)	sp|O00178|GTPB1_HUMAN	O00178	GTPB1_HUMAN	GTPBP1	GTP-binding protein 1			1	0	MS/MS	STY:79.9663@LHGGFDS(0.1275)DCS(0.1275)EDGEALNGEPELDLT(0.8725)S(0.8725)K;
LHGGFDSDCSEDGEALNGEPELDLTSK	LHGGFDS[79.9663]DC[57.0215]S[79.9663]EDGEALNGEPELDLTSK	R	L	38	64	27	3	10S(79.9663),7S(79.9663),9C(57.0215)	sp|O00178|GTPB1_HUMAN	O00178	GTPB1_HUMAN	GTPBP1	GTP-binding protein 1			1	5.49128e+06	MS/MS	STY:79.9663@LHGGFDS(0.8282)DCS(0.8282)EDGEALNGEPELDLT(0.1718)S(0.1718)K;
LIHGEDSDSEGEEEGR	LIHGEDS[79.9663]DS[79.9663]EGEEEGR	R	G	81	96	16	2	7S(79.9663),9S(79.9663)	sp|Q9C0C9|UBE2O_HUMAN	Q9C0C9	UBE2O_HUMAN	UBE2O	(E3-independent) E2 ubiquitin-conjugating enzyme			1	1.39919e+06	MS/MS	STY:79.9663@LIHGEDS(1.0000)DS(1.0000)EGEEEGR;
LKFSDEEDGRDSDEEGAEGHR	LKFS[79.9663]DEEDGRDS[79.9663]DEEGAEGHR	K	D	339	359	21	3	12S(79.9663),4S(79.9663)	sp|P48634-2|PRC2A_HUMAN	P48634-2	PRC2A_HUMAN	PRRC2A	Isoform 2 of Protein PRRC2A		sp|P48634-3|PRC2A_HUMAN, sp|P48634-4|PRC2A_HUMAN, sp|P48634|PRC2A_HUMAN	1	1.2444E7	MS/MS	STY:79.9663@LKFS(1.0000)DEEDGRDS(1.0000)DEEGAEGHR;
LKLSPSPSSR	LKLS[79.9663]PSPSSR	R	V	388	397	10	2	4S(79.9663)	sp|P20700|LMNB1_HUMAN	P20700	LMNB1_HUMAN	LMNB1	Lamin-B1	LMNB2	sp|Q03252|LMNB2_HUMAN	6	1.2415356E7	MS/MS	STY:79.9663@LKLS(0.9409)PS(0.0197)PS(0.0197)S(0.0197)R;
LKLSPSPSSR	LKLS[79.9663]PS[79.9663]PSSR	R	V	388	397	10	2	4S(79.9663),6S(79.9663)	sp|P20700|LMNB1_HUMAN	P20700	LMNB1_HUMAN	LMNB1	Lamin-B1	LMNB2	sp|Q03252|LMNB2_HUMAN	6	2.1943132E7	MS/MS	STY:79.9663@LKLS(0.9368)PS(0.9367)PS(0.0632)S(0.0632)R;
LKSEDGVEGDLGETQSR	LKSEDGVEGDLGETQS[79.9663]R	R	T	133	149	17	2	16S(79.9663)	sp|Q09666|AHNK_HUMAN	Q09666	AHNK_HUMAN	AHNAK	Neuroblast differentiation-associated protein AHNAK			1	6.49188e+06	MS/MS	STY:79.9663@LKS(0.0661)EDGVEGDLGET(0.0661)QS(0.8678)R;
LKSEDGVEGDLGETQSR	LKS[79.9663]EDGVEGDLGETQSR	R	T	133	149	17	2	3S(79.9663)	sp|Q09666|AHNK_HUMAN	Q09666	AHNK_HUMAN	AHNAK	Neuroblast differentiation-associated protein AHNAK			4	6.49188e+06	MS/MS	STY:79.9663@LKS(0.9277)EDGVEGDLGET(0.0361)QS(0.0361)R;
LLEDGEDFNLGDALDSSNSMQTIQK	LLEDGEDFNLGDALDSS[79.9663]NSM[15.9949]QTIQK	R	T	383	407	25	3	17S(79.9663),20M(15.9949)	sp|P05783|K1C18_HUMAN	P05783	K1C18_HUMAN	KRT18	Keratin, type I cytoskeletal 18			1	0	MS/MS	STY:79.9663@LLEDGEDFNLGDALDS(0.0158)S(0.4474)NS(0.4474)MQT(0.0895)IQK;M:15.9949@LLEDGEDFNLGDALDSSNSM(1.0000)QTIQK;
LLEDSDSEDEAAPSPLQPALR	LLEDS[79.9663]DSEDEAAPS[79.9663]PLQPALR	R	P	207	227	21	3	14S(79.9663),5S(79.9663)	sp|Q9BW85|YJU2_HUMAN	Q9BW85	YJU2_HUMAN	YJU2	Splicing factor YJU2			1	2.93067e+06	MS/MS	STY:79.9663@LLEDS(0.6588)DS(0.6588)EDEAAPS(0.6825)PLQPALR;
LLEDSEESSEETVSR	LLEDS[79.9663]EESSEETVS[79.9663]R	R	A	99	113	15	2	14S(79.9663),5S(79.9663)	sp|O60231|DHX16_HUMAN	O60231	DHX16_HUMAN	DHX16	Pre-mRNA-splicing factor ATP-dependent RNA helicase DHX16			1	5.38847e+06	MS/MS	STY:79.9663@LLEDS(0.9050)EES(0.1099)S(0.0427)EET(0.0427)VS(0.8999)R;
LLEDSEESSEETVSR	LLEDS[79.9663]EES[79.9663]SEETVSR	R	A	99	113	15	2	5S(79.9663),8S(79.9663)	sp|O60231|DHX16_HUMAN	O60231	DHX16_HUMAN	DHX16	Pre-mRNA-splicing factor ATP-dependent RNA helicase DHX16			2	5416783	MS/MS	STY:79.9663@LLEDS(0.4862)EES(0.4862)S(0.4862)EET(0.4862)VS(0.0552)R;
LLEDSEESSEETVSR	LLEDS[79.9663]EES[79.9663]SEET[79.9663]VSR	R	A	99	113	15	2	12T(79.9663),5S(79.9663),8S(79.9663)	sp|O60231|DHX16_HUMAN	O60231	DHX16_HUMAN	DHX16	Pre-mRNA-splicing factor ATP-dependent RNA helicase DHX16			1	3.51618e+06	MS/MS	STY:79.9663@LLEDS(0.7414)EES(0.7414)S(0.1111)EET(0.7031)VS(0.7031)R;
LLEDSEESSEETVSR	LLEDS[79.9663]EES[79.9663]S[79.9663]EETVSR	R	A	99	113	15	2	5S(79.9663),8S(79.9663),9S(79.9663)	sp|O60231|DHX16_HUMAN	O60231	DHX16_HUMAN	DHX16	Pre-mRNA-splicing factor ATP-dependent RNA helicase DHX16			2	5439473	MS/MS	STY:79.9663@LLEDS(0.9081)EES(0.9081)S(0.9081)EET(0.1378)VS(0.1378)R;
LLGDSDSEEEQK	LLGDS[79.9663]DS[79.9663]EEEQK	R	E	285	296	12	2	5S(79.9663),7S(79.9663)	sp|Q9BW71|HIRP3_HUMAN	Q9BW71	HIRP3_HUMAN	HIRIP3	HIRA-interacting protein 3			4	1.3626124E7	MS/MS	STY:79.9663@LLGDS(1.0000)DS(1.0000)EEEQK;
LLKPGEEPSEYTDEEDTK	LLKPGEEPSEYTDEEDT[79.9663]K	R	D	224	241	18	3	17T(79.9663)	sp|O15173-2|PGRC2_HUMAN	O15173-2	PGRC2_HUMAN	PGRMC2	Isoform 2 of Membrane-associated progesterone receptor component 2		sp|O15173|PGRC2_HUMAN	1	2.588126E7	MS/MS	STY:79.9663@LLKPGEEPS(0.0819)EY(0.0819)T(0.0819)DEEDT(0.7544)K;
LLKPGEEPSEYTDEEDTK	LLKPGEEPSEY[79.9663]TDEEDTK	R	D	224	241	18	2	11Y(79.9663)	sp|O15173-2|PGRC2_HUMAN	O15173-2	PGRC2_HUMAN	PGRMC2	Isoform 2 of Membrane-associated progesterone receptor component 2		sp|O15173|PGRC2_HUMAN	1	1.438963E7	MS/MS	STY:79.9663@LLKPGEEPS(0.0139)EY(0.4858)T(0.4858)DEEDT(0.0145)K;
LLKPGEEPSEYTDEEDTK	LLKPGEEPS[79.9663]EYTDEEDTK	R	D	224	241	18	2,3	9S(79.9663)	sp|O15173-2|PGRC2_HUMAN	O15173-2	PGRC2_HUMAN	PGRMC2	Isoform 2 of Membrane-associated progesterone receptor component 2		sp|O15173|PGRC2_HUMAN	4	4.0270888E7	MS/MS	STY:79.9663@LLKPGEEPS(0.9365)EY(0.0214)T(0.0214)DEEDT(0.0207)K;
LLMTPRAAPTSAPPSK	LLMT[79.9663]PRAAPTSAPPSK	K	S	39	54	16	2	4T(79.9663)	sp|Q13123|RED_HUMAN	Q13123	RED_HUMAN	IK	Protein Red			1	8718721	MS/MS	STY:79.9663@LLMT(0.2542)PRAAPT(0.2542)S(0.2542)APPS(0.2373)K;
LLQQQEEEEACLEEEEEEEDSDEEDQR	LLQQQEEEEAC[57.0215]LEEEEEEEDS[79.9663]DEEDQR	R	S	237	263	27	3	11C(57.0215),21S(79.9663)	sp|Q96F63|CCD97_HUMAN	Q96F63	CCD97_HUMAN	CCDC97	Coiled-coil domain-containing protein 97			2	2.22504e+06	MS/MS	STY:79.9663@LLQQQEEEEACLEEEEEEEDS(1.0000)DEEDQR;
LLSPLSSAR	LLS[79.9663]PLSSAR	R	L	565	573	9	2	3S(79.9663)	sp|Q8IY67-2|RAVR1_HUMAN	Q8IY67-2	RAVR1_HUMAN	RAVER1	Isoform 2 of Ribonucleoprotein PTB-binding 1			1	367255	MS/MS	STY:79.9663@LLS(0.3333)PLS(0.3333)S(0.3333)AR;
LMHNASDSEVDQDDVVEWK	LMHNAS[79.9663]DS[79.9663]EVDQDDVVEWK	K	D	948	966	19	3	6S(79.9663),8S(79.9663)	sp|Q9H2P0|ADNP_HUMAN	Q9H2P0	ADNP_HUMAN	ADNP	Activity-dependent neuroprotector homeobox protein			3	7829764	MS/MS	STY:79.9663@LMHNAS(1.0000)DS(1.0000)EVDQDDVVEWK;
LMHSSSLTNSSIPR	LMHS[79.9663]SSLTNSSIPR	K	F	306	319	14	2	4S(79.9663)	sp|Q08499-6|PDE4D_HUMAN	Q08499-6	PDE4D_HUMAN	PDE4D	Isoform 5 of cAMP-specific 3',5'-cyclic phosphodiesterase 4D		sp|Q08499-10|PDE4D_HUMAN, sp|Q08499-11|PDE4D_HUMAN, sp|Q08499-2|PDE4D_HUMAN, sp|Q08499-3|PDE4D_HUMAN, sp|Q08499-4|PDE4D_HUMAN, sp|Q08499-5|PDE4D_HUMAN, sp|Q08499-8|PDE4D_HUMAN, sp|Q08499-9|PDE4D_HUMAN, sp|Q08499|PDE4D_HUMAN	1	0	MS/MS	STY:79.9663@LMHS(0.1667)S(0.1667)S(0.1667)LT(0.1667)NS(0.1667)S(0.1667)IPR;
LMHNASDSEVDQDDVVEWK	LM[15.9949]HNAS[79.9663]DS[79.9663]EVDQDDVVEWK	K	D	948	966	19	3	2M(15.9949),6S(79.9663),8S(79.9663)	sp|Q9H2P0|ADNP_HUMAN	Q9H2P0	ADNP_HUMAN	ADNP	Activity-dependent neuroprotector homeobox protein			1	3.03535e+06	MS/MS	STY:79.9663@LMHNAS(1.0000)DS(1.0000)EVDQDDVVEWK;M:15.9949@LM(1.0000)HNASDSEVDQDDVVEWK;
LNQPGTPTR	LNQPGTPT[79.9663]R	R	T	389	397	9	2	8T(79.9663)	sp|P36507|MP2K2_HUMAN	P36507	MP2K2_HUMAN	MAP2K2	Dual specificity mitogen-activated protein kinase kinase 2			4	1.111093E7	MS/MS	STY:79.9663@LNQPGT(0.0568)PT(0.9432)R;
LNQPGTPTR	LNQPGT[79.9663]PTR	R	T	389	397	9	2	6T(79.9663)	sp|P36507|MP2K2_HUMAN	P36507	MP2K2_HUMAN	MAP2K2	Dual specificity mitogen-activated protein kinase kinase 2			4	1.120835E7	MS/MS	STY:79.9663@LNQPGT(0.5000)PT(0.5000)R;
LNQSSPDNVTDTK	LNQS[79.9663]SPDNVTDTK	K	G	568	580	13	2	4S(79.9663)	sp|Q08AD1-2|CAMP2_HUMAN	Q08AD1-2	CAMP2_HUMAN	CAMSAP2	Isoform 2 of Calmodulin-regulated spectrin-associated protein 2		sp|Q08AD1-3|CAMP2_HUMAN, sp|Q08AD1|CAMP2_HUMAN	1	0	MS/MS	STY:79.9663@LNQS(0.2500)S(0.2500)PDNVT(0.2500)DT(0.2500)K;
LPDLSPVENK	LPDLS[79.9663]PVENK	K	E	1858	1867	10	2	5S(79.9663)	sp|Q9Y520-2|PRC2C_HUMAN	Q9Y520-2	PRC2C_HUMAN	PRRC2C	Isoform 2 of Protein PRRC2C		sp|Q9Y520-3|PRC2C_HUMAN, sp|Q9Y520-4|PRC2C_HUMAN, sp|Q9Y520-5|PRC2C_HUMAN, sp|Q9Y520-6|PRC2C_HUMAN, sp|Q9Y520-7|PRC2C_HUMAN, sp|Q9Y520|PRC2C_HUMAN	1	1.23322e+06	MS/MS	STY:79.9663@LPDLS(1.0000)PVENK;
LPQSSSSESSPPSPQPTK	LPQSSSSESSPPS[79.9663]PQPTK	K	V	412	429	18	2	13S(79.9663)	sp|Q9UQ35|SRRM2_HUMAN	Q9UQ35	SRRM2_HUMAN	SRRM2	Serine/arginine repetitive matrix protein 2		sp|Q9UQ35-2|SRRM2_HUMAN	1	1.15273e+06	MS/MS	STY:79.9663@LPQS(0.0266)S(0.0266)S(0.0266)S(0.0266)ES(0.0266)S(0.0266)PPS(0.4203)PQPT(0.4203)K;
LPQSSSSESSPPSPQPTK	LPQSSSSESS[79.9663]PPS[79.9663]PQPTK	K	V	412	429	18	2	10S(79.9663),13S(79.9663)	sp|Q9UQ35|SRRM2_HUMAN	Q9UQ35	SRRM2_HUMAN	SRRM2	Serine/arginine repetitive matrix protein 2		sp|Q9UQ35-2|SRRM2_HUMAN	1	0	MS/MS	STY:79.9663@LPQS(0.0665)S(0.0665)S(0.0665)S(0.0665)ES(0.0665)S(0.5559)PPS(0.5559)PQPT(0.5559)K;
LPSGSGAASPTGSAVDIR	LPSGSGAASPTGS[79.9663]AVDIR	R	A	208	225	18	2	13S(79.9663)	sp|Q09666|AHNK_HUMAN	Q09666	AHNK_HUMAN	AHNAK	Neuroblast differentiation-associated protein AHNAK			2	1.6356474E7	MS/MS	STY:79.9663@LPS(0.0404)GS(0.0404)GAAS(0.0404)PT(0.0404)GS(0.8382)AVDIR;
LPSGSGAASPTGSAVDIR	LPSGSGAAS[79.9663]PTGSAVDIR	R	A	208	225	18	2	9S(79.9663)	sp|Q09666|AHNK_HUMAN	Q09666	AHNK_HUMAN	AHNAK	Neuroblast differentiation-associated protein AHNAK			2	1.1640569E7	MS/MS	STY:79.9663@LPS(0.1608)GS(0.1608)GAAS(0.6389)PT(0.0220)GS(0.0174)AVDIR;
LPSGSGAASPTGSAVDIR	LPSGS[79.9663]GAASPTGSAVDIR	R	A	208	225	18	2	5S(79.9663)	sp|Q09666|AHNK_HUMAN	Q09666	AHNK_HUMAN	AHNAK	Neuroblast differentiation-associated protein AHNAK			2	1.6356474E7	MS/MS	STY:79.9663@LPS(0.0777)GS(0.6848)GAAS(0.0792)PT(0.0792)GS(0.0792)AVDIR;
LPSSPVYEDAASFK	LPSSPVYEDAAS[79.9663]FK	R	A	415	428	14	2	12S(79.9663)	sp|Q14247|SRC8_HUMAN	Q14247	SRC8_HUMAN	CTTN	Src substrate cortactin		sp|Q14247-2|SRC8_HUMAN, sp|Q14247-3|SRC8_HUMAN	1	1.1565412E7	MS/MS	STY:79.9663@LPS(0.0766)S(0.0766)PVY(0.0766)EDAAS(0.7702)FK;
LPSSPVYEDAASFK	LPSS[79.9663]PVYEDAASFK	R	A	415	428	14	2	4S(79.9663)	sp|Q14247|SRC8_HUMAN	Q14247	SRC8_HUMAN	CTTN	Src substrate cortactin		sp|Q14247-2|SRC8_HUMAN, sp|Q14247-3|SRC8_HUMAN	1	1.1565412E7	MS/MS	STY:79.9663@LPS(0.0238)S(0.4812)PVY(0.4812)EDAAS(0.0138)FK;
LPSGSGAASPTGSAVDIR	LPS[79.9663]GSGAASPTGSAVDIR	R	A	208	225	18	2	3S(79.9663)	sp|Q09666|AHNK_HUMAN	Q09666	AHNK_HUMAN	AHNAK	Neuroblast differentiation-associated protein AHNAK			1	1.6356474E7	MS/MS	STY:79.9663@LPS(0.4848)GS(0.4848)GAAS(0.0105)PT(0.0100)GS(0.0100)AVDIR;
LPSGSGAASPTGSAVDIR	LPS[79.9663]GSGAASPTGS[79.9663]AVDIR	R	A	208	225	18	2	13S(79.9663),3S(79.9663)	sp|Q09666|AHNK_HUMAN	Q09666	AHNK_HUMAN	AHNAK	Neuroblast differentiation-associated protein AHNAK			1	9084491	MS/MS	STY:79.9663@LPS(0.7837)GS(0.1335)GAAS(0.1499)PT(0.1499)GS(0.7829)AVDIR;
LPSGSGAASPTGSAVDIR	LPS[79.9663]GS[79.9663]GAASPTGSAVDIR	R	A	208	225	18	2	3S(79.9663),5S(79.9663)	sp|Q09666|AHNK_HUMAN	Q09666	AHNK_HUMAN	AHNAK	Neuroblast differentiation-associated protein AHNAK			2	9084491	MS/MS	STY:79.9663@LPS(0.4000)GS(0.4000)GAAS(0.4000)PT(0.4000)GS(0.4000)AVDIR;
LPSSPVYEDAASFK	LPS[79.9663]SPVYEDAASFK	R	A	415	428	14	2	3S(79.9663)	sp|Q14247|SRC8_HUMAN	Q14247	SRC8_HUMAN	CTTN	Src substrate cortactin		sp|Q14247-2|SRC8_HUMAN, sp|Q14247-3|SRC8_HUMAN	3	1.1565412E7	MS/MS	STY:79.9663@LPS(0.4869)S(0.4869)PVY(0.0132)EDAAS(0.0130)FK;
LQDSSSEEEDVTEETDHR	LQDSSS[79.9663]EEEDVT[79.9663]EET[79.9663]DHR	R	N	1011	1028	18	2	12T(79.9663),15T(79.9663),6S(79.9663)	sp|Q76FK4-2|NOL8_HUMAN	Q76FK4-2	NOL8_HUMAN	NOL8	Isoform 2 of Nucleolar protein 8		sp|Q76FK4-4|NOL8_HUMAN, sp|Q76FK4|NOL8_HUMAN	1	7.48731e+06	MS/MS	STY:79.9663@LQDS(0.2566)S(0.2566)S(0.8289)EEEDVT(0.8289)EET(0.8289)DHR;
LQDSSSEEEDVTEETDHR	LQDS[79.9663]S[79.9663]SEEEDVTEET[79.9663]DHR	R	N	1011	1028	18	3	15T(79.9663),4S(79.9663),5S(79.9663)	sp|Q76FK4-2|NOL8_HUMAN	Q76FK4-2	NOL8_HUMAN	NOL8	Isoform 2 of Nucleolar protein 8		sp|Q76FK4-4|NOL8_HUMAN, sp|Q76FK4|NOL8_HUMAN	1	4736631	MS/MS	STY:79.9663@LQDS(0.7040)S(0.6681)S(0.6681)EEEDVT(0.2580)EET(0.7018)DHR;
LQDSSSEEEDVTEETDHR	LQDS[79.9663]S[79.9663]S[79.9663]EEEDVTEETDHR	R	N	1011	1028	18	2,3	4S(79.9663),5S(79.9663),6S(79.9663)	sp|Q76FK4-2|NOL8_HUMAN	Q76FK4-2	NOL8_HUMAN	NOL8	Isoform 2 of Nucleolar protein 8		sp|Q76FK4-4|NOL8_HUMAN, sp|Q76FK4|NOL8_HUMAN	6	1.2223938E7	MS/MS	STY:79.9663@LQDS(0.9218)S(0.9218)S(0.9218)EEEDVT(0.1172)EET(0.1172)DHR;
LQEEGGGSDEEETGSPSEDGMQSAR	LQEEGGGSDEEET[79.9663]GSPSEDGMQSAR	K	T	43	67	25	3	13T(79.9663)	sp|Q13610-2|PWP1_HUMAN	Q13610-2	PWP1_HUMAN	PWP1	Isoform 2 of Periodic tryptophan protein 1 homolog		sp|Q13610|PWP1_HUMAN	1	5.63358e+06	MS/MS	STY:79.9663@LQEEGGGS(0.0441)DEEET(0.6516)GS(0.0454)PS(0.0454)EDGMQS(0.2136)AR;
LQEEGGGSDEEETGSPSEDGMQSAR	LQEEGGGSDEEET[79.9663]GS[79.9663]PSEDGMQSAR	K	T	43	67	25	3	13T(79.9663),15S(79.9663)	sp|Q13610-2|PWP1_HUMAN	Q13610-2	PWP1_HUMAN	PWP1	Isoform 2 of Periodic tryptophan protein 1 homolog		sp|Q13610|PWP1_HUMAN	1	2.10297e+06	MS/MS	STY:79.9663@LQEEGGGS(0.4145)DEEET(0.5178)GS(0.5178)PS(0.5178)EDGMQS(0.0320)AR;
LQEEGGGSDEEETGSPSEDGMQSAR	LQEEGGGS[79.9663]DEEETGSPSEDGMQSAR	K	T	43	67	25	3	8S(79.9663)	sp|Q13610-2|PWP1_HUMAN	Q13610-2	PWP1_HUMAN	PWP1	Isoform 2 of Periodic tryptophan protein 1 homolog		sp|Q13610|PWP1_HUMAN	2	5.63358e+06	MS/MS	STY:79.9663@LQEEGGGS(0.4955)DEEET(0.0141)GS(0.0141)PS(0.0141)EDGMQS(0.4623)AR;
LQEEGGGSDEEETGSPSEDGMQSAR	LQEEGGGS[79.9663]DEEETGSPSEDGM[15.9949]QSAR	K	T	43	67	25	3	21M(15.9949),8S(79.9663)	sp|Q13610-2|PWP1_HUMAN	Q13610-2	PWP1_HUMAN	PWP1	Isoform 2 of Periodic tryptophan protein 1 homolog		sp|Q13610|PWP1_HUMAN	1	1.8404e+06	MS/MS	STY:79.9663@LQEEGGGS(0.7025)DEEET(0.0744)GS(0.0744)PS(0.0744)EDGMQS(0.0744)AR;M:15.9949@LQEEGGGSDEEETGSPSEDGM(1.0000)QSAR;
LQEEGGGSDEEETGSPSEDGMQSAR	LQEEGGGS[79.9663]DEEET[79.9663]GSPSEDGMQSAR	K	T	43	67	25	3	13T(79.9663),8S(79.9663)	sp|Q13610-2|PWP1_HUMAN	Q13610-2	PWP1_HUMAN	PWP1	Isoform 2 of Periodic tryptophan protein 1 homolog		sp|Q13610|PWP1_HUMAN	2	2.10297e+06	MS/MS	STY:79.9663@LQEEGGGS(0.4564)DEEET(0.4564)GS(0.4564)PS(0.4564)EDGMQS(0.1742)AR;
LQPERGSPK	LQPERGS[79.9663]PK	R	K	723	731	9	2	7S(79.9663)	sp|Q9UKV3-5|ACINU_HUMAN	Q9UKV3-5	ACINU_HUMAN	ACIN1	Isoform 4 of Apoptotic chromatin condensation inducer in the nucleus		sp|Q9UKV3|ACINU_HUMAN	1	2.53171e+06	MS/MS	STY:79.9663@LQPERGS(1.0000)PK;
LQQGAGLESPQGQPEPGAASPQR	LQQGAGLESPQGQPEPGAAS[79.9663]PQR	R	Q	72	94	23	3	20S(79.9663)	sp|Q9H6F5|CCD86_HUMAN	Q9H6F5	CCD86_HUMAN	CCDC86	Coiled-coil domain-containing protein 86			7	3.3584312E7	MS/MS	STY:79.9663@LQQGAGLES(0.0555)PQGQPEPGAAS(0.9445)PQR;
LQQGAGLESPQGQPEPGAASPQR	LQQGAGLES[79.9663]PQGQPEPGAASPQR	R	Q	72	94	23	3	9S(79.9663)	sp|Q9H6F5|CCD86_HUMAN	Q9H6F5	CCD86_HUMAN	CCDC86	Coiled-coil domain-containing protein 86			1	3.1153708E7	MS/MS	STY:79.9663@LQQGAGLES(0.8194)PQGQPEPGAAS(0.1806)PQR;
LQQGAGLESPQGQPEPGAASPQR	LQQGAGLES[79.9663]PQGQPEPGAAS[79.9663]PQR	R	Q	72	94	23	3	20S(79.9663),9S(79.9663)	sp|Q9H6F5|CCD86_HUMAN	Q9H6F5	CCD86_HUMAN	CCDC86	Coiled-coil domain-containing protein 86			1	3100764	MS/MS	STY:79.9663@LQQGAGLES(1.0000)PQGQPEPGAAS(1.0000)PQR;
LQQQHSEQPPLQPSPVMTR	LQQQHS[79.9663]EQPPLQPSPVM[15.9949]TR	R	R	130	148	19	3	17M(15.9949),6S(79.9663)	sp|Q5JTV8-2|TOIP1_HUMAN	Q5JTV8-2	TOIP1_HUMAN	TOR1AIP1	Isoform 2 of Torsin-1A-interacting protein 1		sp|Q5JTV8-3|TOIP1_HUMAN, sp|Q5JTV8-4|TOIP1_HUMAN, sp|Q5JTV8|TOIP1_HUMAN	1	1.83592e+06	MS/MS	STY:79.9663@LQQQHS(0.3333)EQPPLQPS(0.3333)PVMT(0.3333)R;M:15.9949@LQQQHSEQPPLQPSPVM(1.0000)TR;
LQTPNTFPK	LQT[79.9663]PNT[79.9663]FPK	K	R	615	623	9	2	3T(79.9663),6T(79.9663)	sp|Q14978-2|NOLC1_HUMAN	Q14978-2	NOLC1_HUMAN	NOLC1	Isoform Beta of Nucleolar and coiled-body phosphoprotein 1		sp|Q14978-3|NOLC1_HUMAN, sp|Q14978|NOLC1_HUMAN	1	629443	MS/MS	STY:79.9663@LQT(1.0000)PNT(1.0000)FPK;
LRLSPSPTSQR	LRLSPSPT[79.9663]SQR	R	S	387	397	11	2	8T(79.9663)	sp|P02545-3|LMNA_HUMAN	P02545-3	LMNA_HUMAN	LMNA	Isoform ADelta10 of Prelamin-A/C		sp|P02545-2|LMNA_HUMAN, sp|P02545-4|LMNA_HUMAN, sp|P02545-5|LMNA_HUMAN, sp|P02545-6|LMNA_HUMAN, sp|P02545|LMNA_HUMAN	1	4.3273748E7	MS/MS	STY:79.9663@LRLS(0.2028)PS(0.2214)PT(0.2879)S(0.2879)QR;
LRLSPSPTSQR	LRLSPS[79.9663]PTS[79.9663]QR	R	S	387	397	11	2	6S(79.9663),9S(79.9663)	sp|P02545-3|LMNA_HUMAN	P02545-3	LMNA_HUMAN	LMNA	Isoform ADelta10 of Prelamin-A/C		sp|P02545-2|LMNA_HUMAN, sp|P02545-4|LMNA_HUMAN, sp|P02545-5|LMNA_HUMAN, sp|P02545-6|LMNA_HUMAN, sp|P02545|LMNA_HUMAN	1	1.54406176E8	MS/MS	STY:79.9663@LRLS(0.0728)PS(0.6256)PT(0.6256)S(0.6759)QR;
LRLSPSPTSQR	LRLSPS[79.9663]PT[79.9663]SQR	R	S	387	397	11	2	6S(79.9663),8T(79.9663)	sp|P02545-3|LMNA_HUMAN	P02545-3	LMNA_HUMAN	LMNA	Isoform ADelta10 of Prelamin-A/C		sp|P02545-2|LMNA_HUMAN, sp|P02545-4|LMNA_HUMAN, sp|P02545-5|LMNA_HUMAN, sp|P02545-6|LMNA_HUMAN, sp|P02545|LMNA_HUMAN	1	1.56772448E8	MS/MS	STY:79.9663@LRLS(0.1222)PS(0.6259)PT(0.6259)S(0.6259)QR;
LRLSPSPTSQR	LRLS[79.9663]PSPTSQR	R	S	387	397	11	2,3	4S(79.9663)	sp|P02545-3|LMNA_HUMAN	P02545-3	LMNA_HUMAN	LMNA	Isoform ADelta10 of Prelamin-A/C		sp|P02545-2|LMNA_HUMAN, sp|P02545-4|LMNA_HUMAN, sp|P02545-5|LMNA_HUMAN, sp|P02545-6|LMNA_HUMAN, sp|P02545|LMNA_HUMAN	4	5.35427E7	MS/MS	STY:79.9663@LRLS(0.8979)PS(0.0240)PT(0.0240)S(0.0541)QR;
LRLSPSPTSQR	LRLS[79.9663]PSPTS[79.9663]QR	R	S	387	397	11	2	4S(79.9663),9S(79.9663)	sp|P02545-3|LMNA_HUMAN	P02545-3	LMNA_HUMAN	LMNA	Isoform ADelta10 of Prelamin-A/C		sp|P02545-2|LMNA_HUMAN, sp|P02545-4|LMNA_HUMAN, sp|P02545-5|LMNA_HUMAN, sp|P02545-6|LMNA_HUMAN, sp|P02545|LMNA_HUMAN	1	0	MS/MS	STY:79.9663@LRLS(0.8054)PS(0.1964)PT(0.1964)S(0.8018)QR;
LRLSPSPTSQR	LRLS[79.9663]PSPT[79.9663]SQR	R	S	387	397	11	2	4S(79.9663),8T(79.9663)	sp|P02545-3|LMNA_HUMAN	P02545-3	LMNA_HUMAN	LMNA	Isoform ADelta10 of Prelamin-A/C		sp|P02545-2|LMNA_HUMAN, sp|P02545-4|LMNA_HUMAN, sp|P02545-5|LMNA_HUMAN, sp|P02545-6|LMNA_HUMAN, sp|P02545|LMNA_HUMAN	1	0	MS/MS	STY:79.9663@LRLS(0.6607)PS(0.1181)PT(0.6106)S(0.6106)QR;
LRLSPSPTSQR	LRLS[79.9663]PS[79.9663]PTSQR	R	S	387	397	11	2,3	4S(79.9663),6S(79.9663)	sp|P02545-3|LMNA_HUMAN	P02545-3	LMNA_HUMAN	LMNA	Isoform ADelta10 of Prelamin-A/C		sp|P02545-2|LMNA_HUMAN, sp|P02545-4|LMNA_HUMAN, sp|P02545-5|LMNA_HUMAN, sp|P02545-6|LMNA_HUMAN, sp|P02545|LMNA_HUMAN	16	2.6222496E8	MS/MS	STY:79.9663@LRLS(0.9314)PS(0.9313)PT(0.0686)S(0.0686)QR;
LSLEGDHSTPPSAYGSVK	LSLEGDHSTPPSAY[79.9663]GSVK	K	A	29	46	18	2	14Y(79.9663)	sp|P07355-2|ANXA2_HUMAN	P07355-2	ANXA2_HUMAN	ANXA2	Isoform 2 of Annexin A2	ANXA2P2	sp|A6NMY6|AXA2L_HUMAN, sp|P07355|ANXA2_HUMAN	1	3188011	MS/MS	STY:79.9663@LS(0.0102)LEGDHS(0.0104)T(0.0104)PPS(0.0262)AY(0.4714)GS(0.4714)VK;
LSLNNDIFEANSDSDQQSETK	LSLNNDIFEANS[79.9663]DS[79.9663]DQQSETK	R	E	125	145	21	3	12S(79.9663),14S(79.9663)	sp|Q99549-2|MPP8_HUMAN	Q99549-2	MPP8_HUMAN	MPHOSPH8	Isoform 2 of M-phase phosphoprotein 8		sp|Q99549|MPP8_HUMAN	1	3.82007e+06	MS/MS	STY:79.9663@LS(0.0784)LNNDIFEANS(0.8862)DS(0.8862)DQQS(0.0747)ET(0.0747)K;
LSPSPSSR	LSPSPSS[79.9663]R	K	V	390	397	8	2	7S(79.9663)	sp|P20700|LMNB1_HUMAN	P20700	LMNB1_HUMAN	LMNB1	Lamin-B1	LMNB2	sp|Q03252|LMNB2_HUMAN	1	8.3875e+06	MS/MS	STY:79.9663@LS(0.0234)PS(0.0258)PS(0.0258)S(0.9250)R;
LSPSPTSQR	LSPSPTS[79.9663]QR	R	S	389	397	9	2	7S(79.9663)	sp|P02545-3|LMNA_HUMAN	P02545-3	LMNA_HUMAN	LMNA	Isoform ADelta10 of Prelamin-A/C		sp|P02545-2|LMNA_HUMAN, sp|P02545-4|LMNA_HUMAN, sp|P02545-5|LMNA_HUMAN, sp|P02545-6|LMNA_HUMAN, sp|P02545|LMNA_HUMAN	1	4.272906E7	MS/MS	STY:79.9663@LS(0.0218)PS(0.0407)PT(0.0407)S(0.8967)QR;
LSPSPTSQR	LSPSPT[79.9663]SQR	R	S	389	397	9	2	6T(79.9663)	sp|P02545-3|LMNA_HUMAN	P02545-3	LMNA_HUMAN	LMNA	Isoform ADelta10 of Prelamin-A/C		sp|P02545-2|LMNA_HUMAN, sp|P02545-4|LMNA_HUMAN, sp|P02545-5|LMNA_HUMAN, sp|P02545-6|LMNA_HUMAN, sp|P02545|LMNA_HUMAN	1	4.2639688E7	MS/MS	STY:79.9663@LS(0.0242)PS(0.0240)PT(0.9321)S(0.0197)QR;
LSPSPTSQR	LSPS[79.9663]PTSQR	R	S	389	397	9	2	4S(79.9663)	sp|P02545-3|LMNA_HUMAN	P02545-3	LMNA_HUMAN	LMNA	Isoform ADelta10 of Prelamin-A/C		sp|P02545-2|LMNA_HUMAN, sp|P02545-4|LMNA_HUMAN, sp|P02545-5|LMNA_HUMAN, sp|P02545-6|LMNA_HUMAN, sp|P02545|LMNA_HUMAN	2	4.2639688E7	MS/MS	STY:79.9663@LS(0.0243)PS(0.9353)PT(0.0202)S(0.0202)QR;
LSSQISAGEEK	LSSQIS[79.9663]AGEEK	K	W	293	303	11	2	6S(79.9663)	sp|Q86UE4|LYRIC_HUMAN	Q86UE4	LYRIC_HUMAN	MTDH	Protein LYRIC			2	9848664	MS/MS	STY:79.9663@LS(0.0635)S(0.0563)QIS(0.8802)AGEEK;
LSSPATLNSR	LSS[79.9663]PATLNSR	K	V	98	107	10	2	3S(79.9663)	sp|P00761|TRYP_PIG	P00761	TRYP_PIG		Trypsin			1	0	MS/MS	STY:79.9663@LS(0.0281)S(0.3240)PAT(0.3240)LNS(0.3240)R;
LSSPVLHR	LSS[79.9663]PVLHR	R	L	142	149	8	2	3S(79.9663)	sp|Q16643-2|DREB_HUMAN	Q16643-2	DREB_HUMAN	DBN1	Isoform 2 of Drebrin		sp|Q16643-3|DREB_HUMAN, sp|Q16643|DREB_HUMAN	1	8595312	MS/MS	STY:79.9663@LS(0.1193)S(0.8807)PVLHR;
LSVPTSDEEDEVPAPK	LSVPTS[79.9663]DEEDEVPAPK	K	P	104	119	16	2	6S(79.9663)	sp|Q8NE71|ABCF1_HUMAN	Q8NE71	ABCF1_HUMAN	ABCF1	ATP-binding cassette sub-family F member 1		sp|Q8NE71-2|ABCF1_HUMAN	1	9696175	MS/MS	STY:79.9663@LS(0.0473)VPT(0.1557)S(0.7971)DEEDEVPAPK;
LSVPTSDEEDEVPAPK	LSVPT[79.9663]SDEEDEVPAPK	K	P	104	119	16	2	5T(79.9663)	sp|Q8NE71|ABCF1_HUMAN	Q8NE71	ABCF1_HUMAN	ABCF1	ATP-binding cassette sub-family F member 1		sp|Q8NE71-2|ABCF1_HUMAN	2	9696175	MS/MS	STY:79.9663@LS(0.0174)VPT(0.4913)S(0.4913)DEEDEVPAPK;
LSVPTSDEEDEVPAPK	LSVPT[79.9663]S[79.9663]DEEDEVPAPK	K	P	104	119	16	2	5T(79.9663),6S(79.9663)	sp|Q8NE71|ABCF1_HUMAN	Q8NE71	ABCF1_HUMAN	ABCF1	ATP-binding cassette sub-family F member 1		sp|Q8NE71-2|ABCF1_HUMAN	1	8218425	MS/MS	STY:79.9663@LS(0.1595)VPT(0.9203)S(0.9203)DEEDEVPAPK;
LSCSDDTAPESQAAWQK	LS[79.9663]C[57.0215]S[79.9663]DDTAPES[79.9663]QAAWQK	R	D	128	144	17	3	11S(79.9663),2S(79.9663),3C(57.0215),4S(79.9663)	sp|O95428-2|PPN_HUMAN	O95428-2	PPN_HUMAN	PAPLN	Isoform 2 of Papilin		sp|O95428-4|PPN_HUMAN, sp|O95428-5|PPN_HUMAN, sp|O95428-6|PPN_HUMAN, sp|O95428|PPN_HUMAN	1	0	MS/MS	STY:79.9663@LS(0.7451)CS(0.7451)DDT(0.7451)APES(0.7647)QAAWQK;
LSDSPSMGR	LS[79.9663]DSPSMGR	K	Y	971	979	9	2	2S(79.9663)	sp|O60245-2|PCDH7_HUMAN	O60245-2	PCDH7_HUMAN	PCDH7	Isoform B of Protocadherin-7		sp|O60245|PCDH7_HUMAN	1	769457	MS/MS	STY:79.9663@LS(0.3333)DS(0.3333)PS(0.3333)MGR;
LSGFSFKK	LS[79.9663]GFSFKK	K	N	166	173	8	2	2S(79.9663)	sp|P29966|MARCS_HUMAN	P29966	MARCS_HUMAN	MARCKS	Myristoylated alanine-rich C-kinase substrate			2	1.0124827E7	MS/MS	STY:79.9663@LS(0.5530)GFS(0.4470)FKK;
LSLEGDHSTPPSAYGSVK	LS[79.9663]LEGDHSTPPSAYGSVK	K	A	29	46	18	2	2S(79.9663)	sp|P07355-2|ANXA2_HUMAN	P07355-2	ANXA2_HUMAN	ANXA2	Isoform 2 of Annexin A2	ANXA2P2	sp|A6NMY6|AXA2L_HUMAN, sp|P07355|ANXA2_HUMAN	1	3188011	MS/MS	STY:79.9663@LS(0.1667)LEGDHS(0.1667)T(0.1667)PPS(0.1667)AY(0.1667)GS(0.1667)VK;
LSPSPSSR	LS[79.9663]PSPSSR	K	V	390	397	8	2	2S(79.9663)	sp|P20700|LMNB1_HUMAN	P20700	LMNB1_HUMAN	LMNB1	Lamin-B1	LMNB2	sp|Q03252|LMNB2_HUMAN	1	8.3875e+06	MS/MS	STY:79.9663@LS(0.2500)PS(0.2500)PS(0.2500)S(0.2500)R;
LSPSPTSQR	LS[79.9663]PSPTSQR	R	S	389	397	9	2	2S(79.9663)	sp|P02545-3|LMNA_HUMAN	P02545-3	LMNA_HUMAN	LMNA	Isoform ADelta10 of Prelamin-A/C		sp|P02545-2|LMNA_HUMAN, sp|P02545-4|LMNA_HUMAN, sp|P02545-5|LMNA_HUMAN, sp|P02545-6|LMNA_HUMAN, sp|P02545|LMNA_HUMAN	1	4.272906E7	MS/MS	STY:79.9663@LS(0.2500)PS(0.2500)PT(0.2500)S(0.2500)QR;
LSPVISPR	LS[79.9663]PVIS[79.9663]PR	K	N	54	61	8	2	2S(79.9663),6S(79.9663)	sp|Q08499-6|PDE4D_HUMAN	Q08499-6	PDE4D_HUMAN	PDE4D	Isoform 5 of cAMP-specific 3',5'-cyclic phosphodiesterase 4D		sp|Q08499-12|PDE4D_HUMAN, sp|Q08499-7|PDE4D_HUMAN	1	436458	MS/MS	STY:79.9663@LS(1.0000)PVIS(1.0000)PR;
LSSEDEEEDEAEDDQSEASGK	LS[79.9663]SEDEEEDEAEDDQSEAS[79.9663]GK	K	K	141	161	21	2	19S(79.9663),2S(79.9663)	sp|Q8NEJ9-2|NGDN_HUMAN	Q8NEJ9-2	NGDN_HUMAN	NGDN	Isoform 2 of Neuroguidin		sp|Q8NEJ9|NGDN_HUMAN	1	0	MS/MS	STY:79.9663@LS(0.5449)S(0.5449)EDEEEDEAEDDQS(0.3286)EAS(0.5816)GK;
LSSPVLHR	LS[79.9663]SPVLHR	R	L	142	149	8	2	2S(79.9663)	sp|Q16643-2|DREB_HUMAN	Q16643-2	DREB_HUMAN	DBN1	Isoform 2 of Drebrin		sp|Q16643-3|DREB_HUMAN, sp|Q16643|DREB_HUMAN	1	3.98725e+06	MS/MS	STY:79.9663@LS(0.5000)S(0.5000)PVLHR;
LSSQISAGEEK	LS[79.9663]SQISAGEEK	K	W	293	303	11	2	2S(79.9663)	sp|Q86UE4|LYRIC_HUMAN	Q86UE4	LYRIC_HUMAN	MTDH	Protein LYRIC			1	9848664	MS/MS	STY:79.9663@LS(0.3333)S(0.3333)QIS(0.3333)AGEEK;
LSSEDEEEDEAEDDQSEASGK	LS[79.9663]S[79.9663]EDEEEDEAEDDQSEASGK	K	K	141	161	21	2,3	2S(79.9663),3S(79.9663)	sp|Q8NEJ9-2|NGDN_HUMAN	Q8NEJ9-2	NGDN_HUMAN	NGDN	Isoform 2 of Neuroguidin		sp|Q8NEJ9|NGDN_HUMAN	2	1.33612e+06	MS/MS	STY:79.9663@LS(0.8019)S(0.8019)EDEEEDEAEDDQS(0.1981)EAS(0.1981)GK;
LSSSDRYSDASDDSFSEPR	LS[79.9663]S[79.9663]S[79.9663]DRYSDASDDSFSEPR	K	I	561	579	19	3	2S(79.9663),3S(79.9663),4S(79.9663)	sp|Q9NRF8|PYRG2_HUMAN	Q9NRF8	PYRG2_HUMAN	CTPS2	CTP synthase 2			1	1359838	MS/MS	STY:79.9663@LS(0.4491)S(0.4491)S(0.4491)DRY(0.4491)S(0.4491)DAS(0.4491)DDS(0.1527)FS(0.1527)EPR;
LSVPTSDEEDEVPAPK	LS[79.9663]VPTSDEEDEVPAPK	K	P	104	119	16	2	2S(79.9663)	sp|Q8NE71|ABCF1_HUMAN	Q8NE71	ABCF1_HUMAN	ABCF1	ATP-binding cassette sub-family F member 1		sp|Q8NE71-2|ABCF1_HUMAN	1	9696175	MS/MS	STY:79.9663@LS(0.3333)VPT(0.3333)S(0.3333)DEEDEVPAPK;
LSVPTSDEEDEVPAPK	LS[79.9663]VPT[79.9663]SDEEDEVPAPK	K	P	104	119	16	2	2S(79.9663),5T(79.9663)	sp|Q8NE71|ABCF1_HUMAN	Q8NE71	ABCF1_HUMAN	ABCF1	ATP-binding cassette sub-family F member 1		sp|Q8NE71-2|ABCF1_HUMAN	1	8218425	MS/MS	STY:79.9663@LS(0.6667)VPT(0.6667)S(0.6667)DEEDEVPAPK;
LSVPTSDEEDEVPAPK	LS[79.9663]VPT[79.9663]S[79.9663]DEEDEVPAPK	K	P	104	119	16	2	2S(79.9663),5T(79.9663),6S(79.9663)	sp|Q8NE71|ABCF1_HUMAN	Q8NE71	ABCF1_HUMAN	ABCF1	ATP-binding cassette sub-family F member 1		sp|Q8NE71-2|ABCF1_HUMAN	2	2.52341e+06	MS/MS	STY:79.9663@LS(1.0000)VPT(1.0000)S(1.0000)DEEDEVPAPK;
LTPVSPESSSTEEK	LTPVSPESSST[79.9663]EEK	R	S	184	197	14	2	11T(79.9663)	sp|Q13501-2|SQSTM_HUMAN	Q13501-2	SQSTM_HUMAN	SQSTM1	Isoform 2 of Sequestosome-1		sp|Q13501|SQSTM_HUMAN	1	1.0231195E7	MS/MS	STY:79.9663@LT(0.2134)PVS(0.2134)PES(0.0296)S(0.0296)S(0.0296)T(0.4844)EEK;
LTPVSPESSSTEEK	LTPVSPESSS[79.9663]TEEK	R	S	184	197	14	2	10S(79.9663)	sp|Q13501-2|SQSTM_HUMAN	Q13501-2	SQSTM_HUMAN	SQSTM1	Isoform 2 of Sequestosome-1		sp|Q13501|SQSTM_HUMAN	1	1.909295E7	MS/MS	STY:79.9663@LT(0.0118)PVS(0.0130)PES(0.0782)S(0.0782)S(0.4094)T(0.4094)EEK;
LTPVSPESSSTEEK	LTPVS[79.9663]PESSSTEEK	R	S	184	197	14	2	5S(79.9663)	sp|Q13501-2|SQSTM_HUMAN	Q13501-2	SQSTM_HUMAN	SQSTM1	Isoform 2 of Sequestosome-1		sp|Q13501|SQSTM_HUMAN	3	2.9324144E7	MS/MS	STY:79.9663@LT(0.0137)PVS(0.9365)PES(0.0129)S(0.0123)S(0.0123)T(0.0123)EEK;
LTFDSSFSPNTGK	LT[79.9663]FDSSFSPNTGK	K	K	97	109	13	2	2T(79.9663)	sp|P21796|VDAC1_HUMAN	P21796	VDAC1_HUMAN	VDAC1	Voltage-dependent anion-selective channel protein 1			1	794698	MS/MS	STY:79.9663@LT(0.2478)FDS(0.2478)S(0.2478)FS(0.2478)PNT(0.0090)GK;
LTPVSPESSSTEEK	LT[79.9663]PVSPESSSTEEK	R	S	184	197	14	2	2T(79.9663)	sp|Q13501-2|SQSTM_HUMAN	Q13501-2	SQSTM_HUMAN	SQSTM1	Isoform 2 of Sequestosome-1		sp|Q13501|SQSTM_HUMAN	4	2.9324144E7	MS/MS	STY:79.9663@LT(0.5098)PVS(0.4342)PES(0.0123)S(0.0123)S(0.0157)T(0.0157)EEK;
LTQAEISEQPTMATVVPQVPTSPK	LT[79.9663]QAEISEQPTMATVVPQVPTSPK	R	S	1133	1156	24	3	2T(79.9663)	sp|Q70E73|RAPH1_HUMAN	Q70E73	RAPH1_HUMAN	RAPH1	Ras-associated and pleckstrin homology domains-containing protein 1			1	0	MS/MS	STY:79.9663@LT(0.1667)QAEIS(0.1667)EQPT(0.1667)MAT(0.1667)VVPQVPT(0.1667)S(0.1667)PK;
LTVENSPKQEAGISEGQGTAGEEEEK	LT[79.9663]VENSPKQEAGISEGQGTAGEEEEK	K	K	68	93	26	3	2T(79.9663)	sp|O43583|DENR_HUMAN	O43583	DENR_HUMAN	DENR	Density-regulated protein			3	2.653e+06	MS/MS	STY:79.9663@LT(0.4659)VENS(0.4659)PKQEAGIS(0.0341)EGQGT(0.0341)AGEEEEK;
LVEQANSPK	LVEQANS[79.9663]PK	K	H	209	217	9	2	7S(79.9663)	sp|O95391|SLU7_HUMAN	O95391	SLU7_HUMAN	SLU7	Pre-mRNA-splicing factor SLU7			1	1618586	MS/MS	STY:79.9663@LVEQANS(1.0000)PK;
LYADSDSGDDSDK	LY[79.9663]ADS[79.9663]DSGDDSDK	R	R	670	682	13	2	2Y(79.9663),5S(79.9663)	sp|O43896|KIF1C_HUMAN	O43896	KIF1C_HUMAN	KIF1C	Kinesin-like protein KIF1C			1	0	MS/MS	STY:79.9663@LY(0.6171)ADS(0.6171)DS(0.6171)GDDS(0.1486)DK;
MADHLEGLSSDDEETSTDITNFNLEK	MADHLEGLS[79.9663]S[79.9663]DDEETSTDITNFNLEK	K	D	549	574	26	3	10S(79.9663),9S(79.9663)	sp|Q9Y5B6-2|PAXB1_HUMAN	Q9Y5B6-2	PAXB1_HUMAN	PAXBP1	Isoform 2 of PAX3- and PAX7-binding protein 1		sp|Q9Y5B6|PAXB1_HUMAN	2	1.4928134E7	MS/MS	STY:79.9663@MADHLEGLS(0.3971)S(0.3971)DDEET(0.3971)S(0.3971)T(0.3971)DIT(0.0144)NFNLEK;
MEREDSSEEEEEEIDDEEIER	MEREDS[79.9663]S[79.9663]EEEEEEIDDEEIER	R	R	127	147	21	3	6S(79.9663),7S(79.9663)	sp|P55081|MFAP1_HUMAN	P55081	MFAP1_HUMAN	MFAP1	Microfibrillar-associated protein 1			16	1.927037E7	MS/MS	STY:79.9663@MEREDS(1.0000)S(1.0000)EEEEEEIDDEEIER;
MESEGGADDSAEEGDLLDDDDNEDR	MESEGGADDS[79.9663]AEEGDLLDDDDNEDR	K	G	238	262	25	3	10S(79.9663)	sp|P07910-2|HNRPC_HUMAN	P07910-2	HNRPC_HUMAN	HNRNPC	Isoform C1 of Heterogeneous nuclear ribonucleoproteins C1/C2		sp|P07910-3|HNRPC_HUMAN, sp|P07910-4|HNRPC_HUMAN, sp|P07910|HNRPC_HUMAN	3	1.5969454E7	MS/MS	STY:79.9663@MES(0.0709)EGGADDS(0.9291)AEEGDLLDDDDNEDR;
MESEGGADDSAEEGDLLDDDDNEDRGDDQLELIK	MESEGGADDS[79.9663]AEEGDLLDDDDNEDRGDDQLELIK	K	D	238	271	34	3,4	10S(79.9663)	sp|P07910-2|HNRPC_HUMAN	P07910-2	HNRPC_HUMAN	HNRNPC	Isoform C1 of Heterogeneous nuclear ribonucleoproteins C1/C2		sp|P07910-3|HNRPC_HUMAN, sp|P07910-4|HNRPC_HUMAN, sp|P07910|HNRPC_HUMAN	5	9.7414016E7	MS/MS	STY:79.9663@MES(0.0889)EGGADDS(0.9111)AEEGDLLDDDDNEDRGDDQLELIK;
MESEGGADDSAEEGDLLDDDDNEDRGDDQLELIKDDEK	MESEGGADDS[79.9663]AEEGDLLDDDDNEDRGDDQLELIKDDEK	K	E	238	275	38	4	10S(79.9663)	sp|P07910-2|HNRPC_HUMAN	P07910-2	HNRPC_HUMAN	HNRNPC	Isoform C1 of Heterogeneous nuclear ribonucleoproteins C1/C2		sp|P07910-3|HNRPC_HUMAN, sp|P07910-4|HNRPC_HUMAN, sp|P07910|HNRPC_HUMAN	1	5844647	MS/MS	STY:79.9663@MES(0.1393)EGGADDS(0.8607)AEEGDLLDDDDNEDRGDDQLELIKDDEK;
MESEGGADDSAEEGDLLDDDDNEDR	MES[79.9663]EGGADDSAEEGDLLDDDDNEDR	K	G	238	262	25	3	3S(79.9663)	sp|P07910-2|HNRPC_HUMAN	P07910-2	HNRPC_HUMAN	HNRNPC	Isoform C1 of Heterogeneous nuclear ribonucleoproteins C1/C2		sp|P07910-3|HNRPC_HUMAN, sp|P07910-4|HNRPC_HUMAN, sp|P07910|HNRPC_HUMAN	2	1.5969454E7	MS/MS	STY:79.9663@MES(0.5000)EGGADDS(0.5000)AEEGDLLDDDDNEDR;
MESEGGADDSAEEGDLLDDDDNEDRGDDQLELIK	MES[79.9663]EGGADDSAEEGDLLDDDDNEDRGDDQLELIK	K	D	238	271	34	3	3S(79.9663)	sp|P07910-2|HNRPC_HUMAN	P07910-2	HNRPC_HUMAN	HNRNPC	Isoform C1 of Heterogeneous nuclear ribonucleoproteins C1/C2		sp|P07910-3|HNRPC_HUMAN, sp|P07910-4|HNRPC_HUMAN, sp|P07910|HNRPC_HUMAN	1	3.6810344E7	MS/MS	STY:79.9663@MES(0.9385)EGGADDS(0.0615)AEEGDLLDDDDNEDRGDDQLELIK;
MESEGGADDSAEEGDLLDDDDNEDRGDDQLELIK	MES[79.9663]EGGADDS[79.9663]AEEGDLLDDDDNEDRGDDQLELIK	K	D	238	271	34	3	10S(79.9663),3S(79.9663)	sp|P07910-2|HNRPC_HUMAN	P07910-2	HNRPC_HUMAN	HNRNPC	Isoform C1 of Heterogeneous nuclear ribonucleoproteins C1/C2		sp|P07910-3|HNRPC_HUMAN, sp|P07910-4|HNRPC_HUMAN, sp|P07910|HNRPC_HUMAN	4	4.64066E7	MS/MS	STY:79.9663@MES(1.0000)EGGADDS(1.0000)AEEGDLLDDDDNEDRGDDQLELIK;
METVSNASSSSNPSSPGR	METVSNASSSSNPS[79.9663]SPGR	R	I	1152	1169	18	2	14S(79.9663)	sp|Q9NTI5|PDS5B_HUMAN	Q9NTI5	PDS5B_HUMAN	PDS5B	Sister chromatid cohesion protein PDS5 homolog B		sp|Q9NTI5-2|PDS5B_HUMAN	1	2.19508e+06	MS/MS	STY:79.9663@MET(0.0084)VS(0.0084)NAS(0.0120)S(0.0628)S(0.0628)S(0.0628)NPS(0.3914)S(0.3914)PGR;
MGQAPSQSLLPPAQDQPRSPVPSAFSDQSR	MGQAPSQSLLPPAQDQPRS[79.9663]PVPSAFSDQSR	R	C	2431	2460	30	3	19S(79.9663)	sp|Q9UQ35|SRRM2_HUMAN	Q9UQ35	SRRM2_HUMAN	SRRM2	Serine/arginine repetitive matrix protein 2			1	2.62637e+06	MS/MS	STY:79.9663@MGQAPS(0.0133)QS(0.0133)LLPPAQDQPRS(0.2434)PVPS(0.2434)AFS(0.2434)DQS(0.2434)R;
MHDGELEEQEEDDEKSDSEGGDLDK	MHDGELEEQEEDDEKS[79.9663]DS[79.9663]EGGDLDK	K	H	4737	4761	25	3	16S(79.9663),18S(79.9663)	sp|Q9NU22|MDN1_HUMAN	Q9NU22	MDN1_HUMAN	MDN1	Midasin			4	9118306	MS/MS	STY:79.9663@MHDGELEEQEEDDEKS(1.0000)DS(1.0000)EGGDLDK;
MHNLHGTKPPPSEGSDEEEEEEDEEDEEER	MHNLHGTKPPPS[79.9663]EGS[79.9663]DEEEEEEDEEDEEER	R	K	108	137	30	3,4	12S(79.9663),15S(79.9663)	sp|Q9BQ67|GRWD1_HUMAN	Q9BQ67	GRWD1_HUMAN	GRWD1	Glutamate-rich WD repeat-containing protein 1			19	3.4802016E7	MS/MS	STY:79.9663@MHNLHGT(0.1663)KPPPS(0.9168)EGS(0.9168)DEEEEEEDEEDEEER;
MHNLHGTKPPPSEGSDEEEEEEDEEDEEER	MHNLHGT[79.9663]KPPPSEGSDEEEEEEDEEDEEER	R	K	108	137	30	4	7T(79.9663)	sp|Q9BQ67|GRWD1_HUMAN	Q9BQ67	GRWD1_HUMAN	GRWD1	Glutamate-rich WD repeat-containing protein 1			1	0	MS/MS	STY:79.9663@MHNLHGT(0.3333)KPPPS(0.3333)EGS(0.3333)DEEEEEEDEEDEEER;
MHNLHGTKPPPSEGSDEEEEEEDEEDEEER	MHNLHGT[79.9663]KPPPSEGS[79.9663]DEEEEEEDEEDEEER	R	K	108	137	30	4	15S(79.9663),7T(79.9663)	sp|Q9BQ67|GRWD1_HUMAN	Q9BQ67	GRWD1_HUMAN	GRWD1	Glutamate-rich WD repeat-containing protein 1			1	0	MS/MS	STY:79.9663@MHNLHGT(0.6584)KPPPS(0.6584)EGS(0.6831)DEEEEEEDEEDEEER;
MHNLHGTKPPPSEGSDEEEEEEDEEDEEER	MHNLHGT[79.9663]KPPPS[79.9663]EGSDEEEEEEDEEDEEER	R	K	108	137	30	3,4	12S(79.9663),7T(79.9663)	sp|Q9BQ67|GRWD1_HUMAN	Q9BQ67	GRWD1_HUMAN	GRWD1	Glutamate-rich WD repeat-containing protein 1			66	5.4433616E7	MS/MS	STY:79.9663@MHNLHGT(0.7952)KPPPS(0.7952)EGS(0.4096)DEEEEEEDEEDEEER;
MLAESDESGDEESVSQTDK	MLAES[79.9663]DES[79.9663]GDEESVSQTDK	K	T	186	204	19	2	5S(79.9663),8S(79.9663)	sp|P22059|OSBP1_HUMAN	P22059	OSBP1_HUMAN	OSBP	Oxysterol-binding protein 1			4	6430175	MS/MS	STY:79.9663@MLAES(0.7371)DES(0.7371)GDEES(0.1752)VS(0.1752)QT(0.1752)DK;
MLGEDSDEEEEMDTSER	MLGEDS[79.9663]DEEEEMDTSER	K	K	307	323	17	2	6S(79.9663)	sp|Q9BWU0|NADAP_HUMAN	Q9BWU0	NADAP_HUMAN	SLC4A1AP	Kanadaptin			1	0	MS/MS	STY:79.9663@MLGEDS(0.8550)DEEEEMDT(0.0725)S(0.0725)ER;
MNEEISSDSESESLAPR	MNEEISSDS[79.9663]ES[79.9663]ES[79.9663]LAPR	K	K	45	61	17	2	11S(79.9663),13S(79.9663),9S(79.9663)	sp|O43818|U3IP2_HUMAN	O43818	U3IP2_HUMAN	RRP9	U3 small nucleolar RNA-interacting protein 2			1	2.0000916E7	MS/MS	STY:79.9663@MNEEIS(0.2359)S(0.2359)DS(0.8427)ES(0.8427)ES(0.8427)LAPR;
MNEEISSDSESESLAPR	MNEEIS[79.9663]SDSES[79.9663]ES[79.9663]LAPR	K	K	45	61	17	2	11S(79.9663),13S(79.9663),6S(79.9663)	sp|O43818|U3IP2_HUMAN	O43818	U3IP2_HUMAN	RRP9	U3 small nucleolar RNA-interacting protein 2			1	0	MS/MS	STY:79.9663@MNEEIS(0.6228)S(0.6228)DS(0.4540)ES(0.6502)ES(0.6502)LAPR;
MNEEISSDSESESLAPR	MNEEIS[79.9663]SDS[79.9663]ES[79.9663]ESLAPR	K	K	45	61	17	3	11S(79.9663),6S(79.9663),9S(79.9663)	sp|O43818|U3IP2_HUMAN	O43818	U3IP2_HUMAN	RRP9	U3 small nucleolar RNA-interacting protein 2			1	924601	MS/MS	STY:79.9663@MNEEIS(0.7072)S(0.7072)DS(0.7416)ES(0.7448)ES(0.0991)LAPR;
MNEEISSDSESESLAPR	MNEEIS[79.9663]S[79.9663]DSES[79.9663]ESLAPR	K	K	45	61	17	2	11S(79.9663),6S(79.9663),7S(79.9663)	sp|O43818|U3IP2_HUMAN	O43818	U3IP2_HUMAN	RRP9	U3 small nucleolar RNA-interacting protein 2			1	2.0151434E7	MS/MS	STY:79.9663@MNEEIS(0.7554)S(0.7178)DS(0.7178)ES(0.7427)ES(0.0663)LAPR;
MNEEISSDSESESLAPR	MNEEIS[79.9663]S[79.9663]DS[79.9663]ESESLAPR	K	K	45	61	17	2	6S(79.9663),7S(79.9663),9S(79.9663)	sp|O43818|U3IP2_HUMAN	O43818	U3IP2_HUMAN	RRP9	U3 small nucleolar RNA-interacting protein 2			11	2.0151434E7	MS/MS	STY:79.9663@MNEEIS(0.9243)S(0.9243)DS(0.9243)ES(0.1135)ES(0.1135)LAPR;
MPAPEPGAAPSNEEDDSDDDDVLAPSGATAAGAGDEGDGQTTGST	MPAPEPGAAPS[79.9663]NEEDDSDDDDVLAPSGATAAGAGDEGDGQTTGST	K	-	518	562	45	3	11S(79.9663)	sp|Q9H6Z4-2|RANB3_HUMAN	Q9H6Z4-2	RANB3_HUMAN	RANBP3	Isoform 2 of Ran-binding protein 3		sp|Q9H6Z4-3|RANB3_HUMAN, sp|Q9H6Z4|RANB3_HUMAN	1	3.4355e+06	MS/MS	STY:79.9663@MPAPEPGAAPS(0.7824)NEEDDS(0.0408)DDDDVLAPS(0.0408)GAT(0.0408)AAGAGDEGDGQT(0.0238)T(0.0238)GS(0.0238)T(0.0238);
MPFLSISSPK	MPFLS[79.9663]ISSPK	K	V	3405	3414	10	2	5S(79.9663)	sp|Q09666|AHNK_HUMAN	Q09666	AHNK_HUMAN	AHNAK	Neuroblast differentiation-associated protein AHNAK			1	440278	MS/MS	STY:79.9663@MPFLS(0.3333)IS(0.3333)S(0.3333)PK;
MPQDGSDDEDEEWPTLEK	MPQDGS[79.9663]DDEDEEWPTLEK	R	A	93	110	18	2	6S(79.9663)	sp|Q13895|BYST_HUMAN	Q13895	BYST_HUMAN	BYSL	Bystin			2	4864603	MS/MS	STY:79.9663@MPQDGS(0.9382)DDEDEEWPT(0.0618)LEK;
MPSFGVSAPGK	MPS[79.9663]FGVSAPGK	K	S	740	750	11	2	3S(79.9663)	sp|Q8IVF2-3|AHNK2_HUMAN	Q8IVF2-3	AHNK2_HUMAN	AHNAK2	Isoform 3 of Protein AHNAK2		sp|Q8IVF2|AHNK2_HUMAN	1	1.41505e+06	MS/MS	STY:79.9663@MPS(0.9144)FGVS(0.0856)APGK;
MREDYDSVEQDGDEPGPQR	MREDY[79.9663]DSVEQDGDEPGPQR	R	S	50	68	19	3	5Y(79.9663)	sp|Q9Y5S9|RBM8A_HUMAN	Q9Y5S9	RBM8A_HUMAN	RBM8A	RNA-binding protein 8A		sp|Q9Y5S9-2|RBM8A_HUMAN	1	0	MS/MS	STY:79.9663@MREDY(0.5000)DS(0.5000)VEQDGDEPGPQR;
MSGFIYQGK	MS[79.9663]GFIYQGK	R	L	339	347	9	2	2S(79.9663)	sp|Q14155-1|ARHG7_HUMAN	Q14155-1	ARHG7_HUMAN	ARHGEF7	Isoform 1 of Rho guanine nucleotide exchange factor 7	ARHGEF6	sp|Q14155-2|ARHG7_HUMAN, sp|Q14155-3|ARHG7_HUMAN, sp|Q14155-5|ARHG7_HUMAN, sp|Q14155-6|ARHG7_HUMAN, sp|Q14155|ARHG7_HUMAN, sp|Q15052-2|ARHG6_HUMAN, sp|Q15052|ARHG6_HUMAN	1	2221717	MS/MS	STY:79.9663@MS(0.8904)GFIY(0.1096)QGK;
MADHLEGLSSDDEETSTDITNFNLEK	M[15.9949]ADHLEGLS[79.9663]SDDEET[79.9663]STDITNFNLEK	K	D	549	574	26	3	15T(79.9663),1M(15.9949),9S(79.9663)	sp|Q9Y5B6-2|PAXB1_HUMAN	Q9Y5B6-2	PAXB1_HUMAN	PAXBP1	Isoform 2 of PAX3- and PAX7-binding protein 1		sp|Q9Y5B6|PAXB1_HUMAN	1	0	MS/MS	STY:79.9663@MADHLEGLS(0.5945)S(0.5945)DDEET(0.6788)S(0.0511)T(0.0511)DIT(0.0300)NFNLEK;M:15.9949@M(1.0000)ADHLEGLSSDDEETSTDITNFNLEK;
MAPTPIPTRSPSDSSTASTPVAEQIER	M[15.9949]APTPIPT[79.9663]RSPSDSSTASTPVAEQIER	R	A	330	356	27	3	1M(15.9949),8T(79.9663)	sp|Q16643-2|DREB_HUMAN	Q16643-2	DREB_HUMAN	DBN1	Isoform 2 of Drebrin		sp|Q16643-3|DREB_HUMAN, sp|Q16643|DREB_HUMAN	2	2.81933e+06	MS/MS	STY:79.9663@MAPT(0.0068)PIPT(0.2309)RS(0.2309)PS(0.2309)DS(0.2309)S(0.0308)T(0.0308)AS(0.0040)T(0.0040)PVAEQIER;M:15.9949@M(1.0000)APTPIPTRSPSDSSTASTPVAEQIER;
MEREDSSEEEEEEIDDEEIER	M[15.9949]EREDS[79.9663]S[79.9663]EEEEEEIDDEEIER	R	R	127	147	21	3	1M(15.9949),6S(79.9663),7S(79.9663)	sp|P55081|MFAP1_HUMAN	P55081	MFAP1_HUMAN	MFAP1	Microfibrillar-associated protein 1			7	7.57861e+06	MS/MS	STY:79.9663@MEREDS(1.0000)S(1.0000)EEEEEEIDDEEIER;M:15.9949@M(1.0000)EREDSSEEEEEEIDDEEIER;
MESEGGADDSAEEGDLLDDDDNEDR	M[15.9949]ESEGGADDS[79.9663]AEEGDLLDDDDNEDR	K	G	238	262	25	3	10S(79.9663),1M(15.9949)	sp|P07910-2|HNRPC_HUMAN	P07910-2	HNRPC_HUMAN	HNRNPC	Isoform C1 of Heterogeneous nuclear ribonucleoproteins C1/C2		sp|P07910-3|HNRPC_HUMAN, sp|P07910-4|HNRPC_HUMAN, sp|P07910|HNRPC_HUMAN	2	9621596	MS/MS	STY:79.9663@MES(0.2086)EGGADDS(0.7914)AEEGDLLDDDDNEDR;M:15.9949@M(1.0000)ESEGGADDSAEEGDLLDDDDNEDR;
MESEGGADDSAEEGDLLDDDDNEDRGDDQLELIK	M[15.9949]ESEGGADDS[79.9663]AEEGDLLDDDDNEDRGDDQLELIK	K	D	238	271	34	3,4	10S(79.9663),1M(15.9949)	sp|P07910-2|HNRPC_HUMAN	P07910-2	HNRPC_HUMAN	HNRNPC	Isoform C1 of Heterogeneous nuclear ribonucleoproteins C1/C2		sp|P07910-3|HNRPC_HUMAN, sp|P07910-4|HNRPC_HUMAN, sp|P07910|HNRPC_HUMAN	3	5.8231748E7	MS/MS	STY:79.9663@MES(0.2203)EGGADDS(0.7797)AEEGDLLDDDDNEDRGDDQLELIK;M:15.9949@M(1.0000)ESEGGADDSAEEGDLLDDDDNEDRGDDQLELIK;
MESEGGADDSAEEGDLLDDDDNEDRGDDQLELIKDDEK	M[15.9949]ESEGGADDS[79.9663]AEEGDLLDDDDNEDRGDDQLELIKDDEK	K	E	238	275	38	3,4	10S(79.9663),1M(15.9949)	sp|P07910-2|HNRPC_HUMAN	P07910-2	HNRPC_HUMAN	HNRNPC	Isoform C1 of Heterogeneous nuclear ribonucleoproteins C1/C2		sp|P07910-3|HNRPC_HUMAN, sp|P07910-4|HNRPC_HUMAN, sp|P07910|HNRPC_HUMAN	2	1.2418607E7	MS/MS	STY:79.9663@MES(0.0823)EGGADDS(0.9177)AEEGDLLDDDDNEDRGDDQLELIKDDEK;M:15.9949@M(1.0000)ESEGGADDSAEEGDLLDDDDNEDRGDDQLELIKDDEK;
MESEGGADDSAEEGDLLDDDDNEDR	M[15.9949]ES[79.9663]EGGADDSAEEGDLLDDDDNEDR	K	G	238	262	25	3	1M(15.9949),3S(79.9663)	sp|P07910-2|HNRPC_HUMAN	P07910-2	HNRPC_HUMAN	HNRNPC	Isoform C1 of Heterogeneous nuclear ribonucleoproteins C1/C2		sp|P07910-3|HNRPC_HUMAN, sp|P07910-4|HNRPC_HUMAN, sp|P07910|HNRPC_HUMAN	2	9621596	MS/MS	STY:79.9663@MES(0.5000)EGGADDS(0.5000)AEEGDLLDDDDNEDR;M:15.9949@M(1.0000)ESEGGADDSAEEGDLLDDDDNEDR;
MESEGGADDSAEEGDLLDDDDNEDRGDDQLELIK	M[15.9949]ES[79.9663]EGGADDSAEEGDLLDDDDNEDRGDDQLELIK	K	D	238	271	34	3	1M(15.9949),3S(79.9663)	sp|P07910-2|HNRPC_HUMAN	P07910-2	HNRPC_HUMAN	HNRNPC	Isoform C1 of Heterogeneous nuclear ribonucleoproteins C1/C2		sp|P07910-3|HNRPC_HUMAN, sp|P07910-4|HNRPC_HUMAN, sp|P07910|HNRPC_HUMAN	5	1.16257328E8	MS/MS	STY:79.9663@MES(0.8517)EGGADDS(0.1483)AEEGDLLDDDDNEDRGDDQLELIK;M:15.9949@M(1.0000)ESEGGADDSAEEGDLLDDDDNEDRGDDQLELIK;
MESEGGADDSAEEGDLLDDDDNEDR	M[15.9949]ES[79.9663]EGGADDS[79.9663]AEEGDLLDDDDNEDR	K	G	238	262	25	3	10S(79.9663),1M(15.9949),3S(79.9663)	sp|P07910-2|HNRPC_HUMAN	P07910-2	HNRPC_HUMAN	HNRNPC	Isoform C1 of Heterogeneous nuclear ribonucleoproteins C1/C2		sp|P07910-3|HNRPC_HUMAN, sp|P07910-4|HNRPC_HUMAN, sp|P07910|HNRPC_HUMAN	2	2.66847e+06	MS/MS	STY:79.9663@MES(1.0000)EGGADDS(1.0000)AEEGDLLDDDDNEDR;M:15.9949@M(1.0000)ESEGGADDSAEEGDLLDDDDNEDR;
MESEGGADDSAEEGDLLDDDDNEDRGDDQLELIK	M[15.9949]ES[79.9663]EGGADDS[79.9663]AEEGDLLDDDDNEDRGDDQLELIK	K	D	238	271	34	3	10S(79.9663),1M(15.9949),3S(79.9663)	sp|P07910-2|HNRPC_HUMAN	P07910-2	HNRPC_HUMAN	HNRNPC	Isoform C1 of Heterogeneous nuclear ribonucleoproteins C1/C2		sp|P07910-3|HNRPC_HUMAN, sp|P07910-4|HNRPC_HUMAN, sp|P07910|HNRPC_HUMAN	1	2.6927164E7	MS/MS	STY:79.9663@MES(1.0000)EGGADDS(1.0000)AEEGDLLDDDDNEDRGDDQLELIK;M:15.9949@M(1.0000)ESEGGADDSAEEGDLLDDDDNEDRGDDQLELIK;
MHDGELEEQEEDDEKSDSEGGDLDK	M[15.9949]HDGELEEQEEDDEKS[79.9663]DS[79.9663]EGGDLDK	K	H	4737	4761	25	3	16S(79.9663),18S(79.9663),1M(15.9949)	sp|Q9NU22|MDN1_HUMAN	Q9NU22	MDN1_HUMAN	MDN1	Midasin			2	5.17407e+06	MS/MS	STY:79.9663@MHDGELEEQEEDDEKS(1.0000)DS(1.0000)EGGDLDK;M:15.9949@M(1.0000)HDGELEEQEEDDEKSDSEGGDLDK;
MHNLHGTKPPPSEGSDEEEEEEDEEDEEER	M[15.9949]HNLHGTKPPPS[79.9663]EGS[79.9663]DEEEEEEDEEDEEER	R	K	108	137	30	3,4	12S(79.9663),15S(79.9663),1M(15.9949)	sp|Q9BQ67|GRWD1_HUMAN	Q9BQ67	GRWD1_HUMAN	GRWD1	Glutamate-rich WD repeat-containing protein 1			5	0	MS/MS	STY:79.9663@MHNLHGT(0.1672)KPPPS(0.9164)EGS(0.9164)DEEEEEEDEEDEEER;M:15.9949@M(1.0000)HNLHGTKPPPSEGSDEEEEEEDEEDEEER;
MHNLHGTKPPPSEGSDEEEEEEDEEDEEER	M[15.9949]HNLHGT[79.9663]KPPPSEGS[79.9663]DEEEEEEDEEDEEER	R	K	108	137	30	3,4	15S(79.9663),1M(15.9949),7T(79.9663)	sp|Q9BQ67|GRWD1_HUMAN	Q9BQ67	GRWD1_HUMAN	GRWD1	Glutamate-rich WD repeat-containing protein 1			2	0	MS/MS	STY:79.9663@MHNLHGT(0.6578)KPPPS(0.6578)EGS(0.6844)DEEEEEEDEEDEEER;M:15.9949@M(1.0000)HNLHGTKPPPSEGSDEEEEEEDEEDEEER;
MHNLHGTKPPPSEGSDEEEEEEDEEDEEER	M[15.9949]HNLHGT[79.9663]KPPPS[79.9663]EGSDEEEEEEDEEDEEER	R	K	108	137	30	3,4	12S(79.9663),1M(15.9949),7T(79.9663)	sp|Q9BQ67|GRWD1_HUMAN	Q9BQ67	GRWD1_HUMAN	GRWD1	Glutamate-rich WD repeat-containing protein 1			22	3.7977328E7	MS/MS	STY:79.9663@MHNLHGT(0.6822)KPPPS(0.6589)EGS(0.6589)DEEEEEEDEEDEEER;M:15.9949@M(1.0000)HNLHGTKPPPSEGSDEEEEEEDEEDEEER;
MLAESDESGDEESVSQTDK	M[15.9949]LAES[79.9663]DES[79.9663]GDEESVSQTDK	K	T	186	204	19	2	1M(15.9949),5S(79.9663),8S(79.9663)	sp|P22059|OSBP1_HUMAN	P22059	OSBP1_HUMAN	OSBP	Oxysterol-binding protein 1			1	3.58666e+06	MS/MS	STY:79.9663@MLAES(0.7645)DES(0.7645)GDEES(0.1570)VS(0.1570)QT(0.1570)DK;M:15.9949@M(1.0000)LAESDESGDEESVSQTDK;
MVIQGPSSPQGEAMVTDVLEDQK	M[15.9949]VIQGPSSPQGEAM[15.9949]VT[79.9663]DVLEDQK	K	E	1112	1134	23	3	14M(15.9949),16T(79.9663),1M(15.9949)	sp|Q12888-2|TP53B_HUMAN	Q12888-2	TP53B_HUMAN	TP53BP1	Isoform 2 of TP53-binding protein 1		sp|Q12888-3|TP53B_HUMAN, sp|Q12888|TP53B_HUMAN	1	1.18719e+06	MS/MS	STY:79.9663@MVIQGPS(0.2023)S(0.2023)PQGEAMVT(0.5954)DVLEDQK;M:15.9949@M(1.0000)VIQGPSSPQGEAM(1.0000)VTDVLEDQK;
MVIQGPSSPQGEAMVTDVLEDQK	M[15.9949]VIQGPS[79.9663]SPQGEAM[15.9949]VTDVLEDQK	K	E	1112	1134	23	3	14M(15.9949),1M(15.9949),7S(79.9663)	sp|Q12888-2|TP53B_HUMAN	Q12888-2	TP53B_HUMAN	TP53BP1	Isoform 2 of TP53-binding protein 1		sp|Q12888-3|TP53B_HUMAN, sp|Q12888|TP53B_HUMAN	1	1.18719e+06	MS/MS	STY:79.9663@MVIQGPS(0.3333)S(0.3333)PQGEAMVT(0.3333)DVLEDQK;M:15.9949@M(1.0000)VIQGPSSPQGEAM(1.0000)VTDVLEDQK;
NAEEESESEAEEGD	NAEEES[79.9663]ES[79.9663]EAEEGD	K	-	340	353	14	2	6S(79.9663),8S(79.9663)	sp|Q7L1Q6-2|5MP2_HUMAN	Q7L1Q6-2	5MP2_HUMAN	BZW1	Isoform 2 of eIF5-mimic protein 2		sp|Q7L1Q6-3|5MP2_HUMAN, sp|Q7L1Q6-4|5MP2_HUMAN, sp|Q7L1Q6|5MP2_HUMAN	5	1.8523388E7	MS/MS	STY:79.9663@NAEEES(1.0000)ES(1.0000)EAEEGD;
NAIASDSEADSDTEVPK	NAIAS[79.9663]DS[79.9663]EADS[79.9663]DTEVPK	K	D	290	306	17	2	11S(79.9663),5S(79.9663),7S(79.9663)	sp|Q8WVC0-2|LEO1_HUMAN	Q8WVC0-2	LEO1_HUMAN	LEO1	Isoform 2 of RNA polymerase-associated protein LEO1		sp|Q8WVC0|LEO1_HUMAN	5	2.4991264E7	MS/MS	STY:79.9663@NAIAS(0.7523)DS(0.7523)EADS(0.7633)DT(0.7320)EVPK;
NALFPEVFSPTPDENSDQNSR	NALFPEVFS[79.9663]PTPDENSDQNSR	R	S	567	587	21	3	9S(79.9663)	sp|Q8IVT2|MISP_HUMAN	Q8IVT2	MISP_HUMAN	MISP	Mitotic interactor and substrate of PLK1			1	963325	MS/MS	STY:79.9663@NALFPEVFS(0.4821)PT(0.4821)PDENS(0.0189)DQNS(0.0170)R;
NALPPVLTTVNGQSPPEHSAPAK	NALPPVLTT[79.9663]VNGQSPPEHSAPAK	K	V	130	152	23	3	9T(79.9663)	sp|Q6PKG0|LARP1_HUMAN	Q6PKG0	LARP1_HUMAN	LARP1	La-related protein 1			1	5462900	MS/MS	STY:79.9663@NALPPVLT(0.0227)T(0.4576)VNGQS(0.4576)PPEHS(0.0621)APAK;
NALPPVLTTVNGQSPPEHSAPAK	NALPPVLT[79.9663]TVNGQSPPEHSAPAK	K	V	130	152	23	3	8T(79.9663)	sp|Q6PKG0|LARP1_HUMAN	Q6PKG0	LARP1_HUMAN	LARP1	La-related protein 1			1	5462900	MS/MS	STY:79.9663@NALPPVLT(0.3301)T(0.3301)VNGQS(0.3301)PPEHS(0.0097)APAK;
NAPAAVDEGSISPR	NAPAAVDEGS[79.9663]ISPR	R	T	373	386	14	2	10S(79.9663)	sp|P28715|ERCC5_HUMAN	P28715	ERCC5_HUMAN	ERCC5	DNA excision repair protein ERCC-5			1	0	MS/MS	STY:79.9663@NAPAAVDEGS(0.5000)IS(0.5000)PR;
NASASFQELEDKK	NAS[79.9663]ASFQELEDKK	R	E	45	57	13	2	3S(79.9663)	sp|Q99543-2|DNJC2_HUMAN	Q99543-2	DNJC2_HUMAN	DNAJC2	Isoform 2 of DnaJ homolog subfamily C member 2		sp|Q99543|DNJC2_HUMAN	2	1.90515e+06	MS/MS	STY:79.9663@NAS(0.7880)AS(0.2120)FQELEDKK;
NASASFQELEDK	NAS[79.9663]AS[79.9663]FQELEDK	R	K	45	56	12	2	3S(79.9663),5S(79.9663)	sp|Q99543-2|DNJC2_HUMAN	Q99543-2	DNJC2_HUMAN	DNAJC2	Isoform 2 of DnaJ homolog subfamily C member 2		sp|Q99543|DNJC2_HUMAN	1	1.68804e+06	MS/MS	STY:79.9663@NAS(1.0000)AS(1.0000)FQELEDK;
NDKSEEEQSSSSVK	NDKS[79.9663]EEEQSSSSVK	K	K	217	230	14	2	4S(79.9663)	sp|P07910-2|HNRPC_HUMAN	P07910-2	HNRPC_HUMAN	HNRNPC	Isoform C1 of Heterogeneous nuclear ribonucleoproteins C1/C2		sp|P07910-3|HNRPC_HUMAN, sp|P07910-4|HNRPC_HUMAN, sp|P07910|HNRPC_HUMAN	3	1.2094265E7	MS/MS	STY:79.9663@NDKS(0.8808)EEEQS(0.0298)S(0.0298)S(0.0298)S(0.0298)VK;
NDLQDTEISPR	NDLQDT[79.9663]EISPR	K	Q	463	473	11	2	6T(79.9663)	sp|Q9NS91|RAD18_HUMAN	Q9NS91	RAD18_HUMAN	RAD18	E3 ubiquitin-protein ligase RAD18			1	0	MS/MS	STY:79.9663@NDLQDT(0.5000)EIS(0.5000)PR;
NDSDLFGLGLEEAGPKESSEEGK	NDSDLFGLGLEEAGPKES[79.9663]S[79.9663]EEGK	K	E	624	646	23	3	18S(79.9663),19S(79.9663)	sp|Q3YEC7-2|RABL6_HUMAN	Q3YEC7-2	RABL6_HUMAN	RABL6	Isoform 2 of Rab-like protein 6		sp|Q3YEC7|RABL6_HUMAN	2	2.0978864E7	MS/MS	STY:79.9663@NDS(0.2820)DLFGLGLEEAGPKES(0.8588)S(0.8592)EEGK;
NDSLVTPSPQQAR	NDS[79.9663]LVTPSPQQAR	R	V	144	156	13	2	3S(79.9663)	sp|Q9GZY8-2|MFF_HUMAN	Q9GZY8-2	MFF_HUMAN	MFF	Isoform 2 of Mitochondrial fission factor			2	2.63753e+06	MS/MS	STY:79.9663@NDS(0.9411)LVT(0.0295)PS(0.0295)PQQAR;
NDSWGSFDLR	NDS[79.9663]WGSFDLR	R	A	650	659	10	2	3S(79.9663)	sp|Q7Z417|NUFP2_HUMAN	Q7Z417	NUFP2_HUMAN	NUFIP2	FMR1-interacting protein NUFIP2			1	1.99674e+06	MS/MS	STY:79.9663@NDS(0.8659)WGS(0.1341)FDLR;
NEEDEGHSNSSPR	NEEDEGHSNS[79.9663]SPR	K	H	73	85	13	2	10S(79.9663)	sp|Q14103-3|HNRPD_HUMAN	Q14103-3	HNRPD_HUMAN	HNRNPD	Isoform 3 of Heterogeneous nuclear ribonucleoprotein D0		sp|Q14103|HNRPD_HUMAN	1	2540940	MS/MS	STY:79.9663@NEEDEGHS(0.0497)NS(0.4752)S(0.4752)PR;
NEEDEGHSNSSPR	NEEDEGHS[79.9663]NSSPR	K	H	73	85	13	2	8S(79.9663)	sp|Q14103-3|HNRPD_HUMAN	Q14103-3	HNRPD_HUMAN	HNRNPD	Isoform 3 of Heterogeneous nuclear ribonucleoprotein D0		sp|Q14103|HNRPD_HUMAN	3	4.8740492E7	MS/MS	STY:79.9663@NEEDEGHS(0.3333)NS(0.3333)S(0.3333)PR;
NEEDSEGSSDEDEDEDGVSAATFLK	NEEDS[79.9663]EGS[79.9663]S[79.9663]DEDEDEDGVSAATFLK	K	K	174	198	25	3	5S(79.9663),8S(79.9663),9S(79.9663)	sp|B5ME19|EIFCL_HUMAN	B5ME19	EIFCL_HUMAN	EIF3CL	Eukaryotic translation initiation factor 3 subunit C-like protein	EIF3C	sp|Q99613-2|EIF3C_HUMAN, sp|Q99613|EIF3C_HUMAN	2	1.4615758E7	MS/MS	STY:79.9663@NEEDS(0.8869)EGS(0.8869)S(0.8869)DEDEDEDGVS(0.1697)AAT(0.1697)FLK;
NEEPSEEEIDAPK	NEEPS[79.9663]EEEIDAPK	K	P	49	61	13	2	5S(79.9663)	sp|Q9NR30-2|DDX21_HUMAN	Q9NR30-2	DDX21_HUMAN	DDX21	Isoform 2 of Nucleolar RNA helicase 2		sp|Q9NR30|DDX21_HUMAN	4	4.49908e+06	MS/MS	STY:79.9663@NEEPS(1.0000)EEEIDAPK;
NEEPSEEEIDAPKPK	NEEPS[79.9663]EEEIDAPKPK	K	K	49	63	15	2,3	5S(79.9663)	sp|Q9NR30-2|DDX21_HUMAN	Q9NR30-2	DDX21_HUMAN	DDX21	Isoform 2 of Nucleolar RNA helicase 2		sp|Q9NR30|DDX21_HUMAN	12	1.6909988E7	MS/MS	STY:79.9663@NEEPS(1.0000)EEEIDAPKPK;
NEGSESAPEGQAQQR	NEGSES[79.9663]APEGQAQQR	K	R	171	185	15	2	6S(79.9663)	sp|P67809|YBOX1_HUMAN	P67809	YBOX1_HUMAN	YBX1	Y-box-binding protein 1			3	2.4712216E7	MS/MS	STY:79.9663@NEGS(0.1100)ES(0.8900)APEGQAQQR;
NEGSESAPEGQAQQR	NEGS[79.9663]ESAPEGQAQQR	K	R	171	185	15	2,3	4S(79.9663)	sp|P67809|YBOX1_HUMAN	P67809	YBOX1_HUMAN	YBX1	Y-box-binding protein 1			9	3.1406256E7	MS/MS	STY:79.9663@NEGS(0.6912)ES(0.3088)APEGQAQQR;
NEGSESAPEGQAQQR	NEGS[79.9663]ES[79.9663]APEGQAQQR	K	R	171	185	15	2	4S(79.9663),6S(79.9663)	sp|P67809|YBOX1_HUMAN	P67809	YBOX1_HUMAN	YBX1	Y-box-binding protein 1			1	0	MS/MS	STY:79.9663@NEGS(1.0000)ES(1.0000)APEGQAQQR;
NEMGIPQQTTSPENAGPQNTK	NEM[15.9949]GIPQQT[79.9663]TSPENAGPQNTK	R	S	571	591	21	3	3M(15.9949),9T(79.9663)	sp|Q15398-1|DLGP5_HUMAN	Q15398-1	DLGP5_HUMAN	DLGAP5	Isoform 2 of Disks large-associated protein 5		sp|Q15398-3|DLGP5_HUMAN, sp|Q15398|DLGP5_HUMAN	2	478212	MS/MS	STY:79.9663@NEMGIPQQT(0.2500)T(0.2500)S(0.2500)PENAGPQNT(0.2500)K;M:15.9949@NEM(1.0000)GIPQQTTSPENAGPQNTK;
NENTEGSPQEDGVELEGLK	NENTEGS[79.9663]PQEDGVELEGLK	K	Q	1267	1285	19	2	7S(79.9663)	sp|P11388-2|TOP2A_HUMAN	P11388-2	TOP2A_HUMAN	TOP2A	Isoform 2 of DNA topoisomerase 2-alpha		sp|P11388-3|TOP2A_HUMAN, sp|P11388-4|TOP2A_HUMAN, sp|P11388|TOP2A_HUMAN	1	7690179	MS/MS	STY:79.9663@NENT(0.0775)EGS(0.9225)PQEDGVELEGLK;
NENTEGSPQEDGVELEGLK	NENT[79.9663]EGSPQEDGVELEGLK	K	Q	1267	1285	19	2,3	4T(79.9663)	sp|P11388-2|TOP2A_HUMAN	P11388-2	TOP2A_HUMAN	TOP2A	Isoform 2 of DNA topoisomerase 2-alpha		sp|P11388-3|TOP2A_HUMAN, sp|P11388-4|TOP2A_HUMAN, sp|P11388|TOP2A_HUMAN	2	9150281	MS/MS	STY:79.9663@NENT(0.5000)EGS(0.5000)PQEDGVELEGLK;
NESEDNKFSDDSDDDFVQPR	NESEDNKFS[79.9663]DDS[79.9663]DDDFVQPR	R	K	983	1002	20	3	12S(79.9663),9S(79.9663)	sp|O15164-2|TIF1A_HUMAN	O15164-2	TIF1A_HUMAN	TRIM24	Isoform Short of Transcription intermediary factor 1-alpha		sp|O15164|TIF1A_HUMAN	1	4.04887e+06	MS/MS	STY:79.9663@NES(0.4867)EDNKFS(0.7567)DDS(0.7567)DDDFVQPR;
NESEDNKFSDDSDDDFVQPR	NES[79.9663]EDNKFS[79.9663]DDSDDDFVQPR	R	K	983	1002	20	3	3S(79.9663),9S(79.9663)	sp|O15164-2|TIF1A_HUMAN	O15164-2	TIF1A_HUMAN	TRIM24	Isoform Short of Transcription intermediary factor 1-alpha		sp|O15164|TIF1A_HUMAN	1	4.04887e+06	MS/MS	STY:79.9663@NES(0.6667)EDNKFS(0.6667)DDS(0.6667)DDDFVQPR;
NFYESDDDQK	NFY[79.9663]ESDDDQK	K	E	223	232	10	2	3Y(79.9663)	sp|O00203-3|AP3B1_HUMAN	O00203-3	AP3B1_HUMAN	AP3B1	Isoform 2 of AP-3 complex subunit beta-1		sp|O00203|AP3B1_HUMAN	1	4912033	MS/MS	STY:79.9663@NFY(0.5000)ES(0.5000)DDDQK;
NGFPHPEPDCNPSEAASEESNSEIEQEIPVEQK	NGFPHPEPDC[57.0215]NPSEAAS[79.9663]EES[79.9663]NS[79.9663]EIEQEIPVEQK	K	E	84	116	33	3,4	10C(57.0215),17S(79.9663),20S(79.9663),22S(79.9663)	sp|Q9NR30-2|DDX21_HUMAN	Q9NR30-2	DDX21_HUMAN	DDX21	Isoform 2 of Nucleolar RNA helicase 2		sp|Q9NR30|DDX21_HUMAN	3	1.4386766E7	MS/MS	STY:79.9663@NGFPHPEPDCNPS(0.3562)EAAS(0.8820)EES(0.8809)NS(0.8809)EIEQEIPVEQK;
NGFPHPEPDCNPSEAASEESNSEIEQEIPVEQK	NGFPHPEPDC[57.0215]NPS[79.9663]EAASEES[79.9663]NS[79.9663]EIEQEIPVEQK	K	E	84	116	33	3	10C(57.0215),13S(79.9663),20S(79.9663),22S(79.9663)	sp|Q9NR30-2|DDX21_HUMAN	Q9NR30-2	DDX21_HUMAN	DDX21	Isoform 2 of Nucleolar RNA helicase 2		sp|Q9NR30|DDX21_HUMAN	3	1.4386766E7	MS/MS	STY:79.9663@NGFPHPEPDCNPS(0.8294)EAAS(0.5108)EES(0.8301)NS(0.8297)EIEQEIPVEQK;
NGFPHPEPDCNPSEAASEESNSEIEQEIPVEQK	NGFPHPEPDC[57.0215]NPS[79.9663]EAAS[79.9663]EESNSEIEQEIPVEQK	K	E	84	116	33	3	10C(57.0215),13S(79.9663),17S(79.9663)	sp|Q9NR30-2|DDX21_HUMAN	Q9NR30-2	DDX21_HUMAN	DDX21	Isoform 2 of Nucleolar RNA helicase 2		sp|Q9NR30|DDX21_HUMAN	2	0	MS/MS	STY:79.9663@NGFPHPEPDCNPS(0.6331)EAAS(0.6331)EES(0.6331)NS(0.1008)EIEQEIPVEQK;
NGFPHPEPDCNPSEAASEESNSEIEQEIPVEQK	NGFPHPEPDC[57.0215]NPS[79.9663]EAAS[79.9663]EESNS[79.9663]EIEQEIPVEQK	K	E	84	116	33	3	10C(57.0215),13S(79.9663),17S(79.9663),22S(79.9663)	sp|Q9NR30-2|DDX21_HUMAN	Q9NR30-2	DDX21_HUMAN	DDX21	Isoform 2 of Nucleolar RNA helicase 2		sp|Q9NR30|DDX21_HUMAN	1	1.4386766E7	MS/MS	STY:79.9663@NGFPHPEPDCNPS(0.7457)EAAS(0.7457)EES(0.7457)NS(0.7629)EIEQEIPVEQK;
NGFPHPEPDCNPSEAASEESNSEIEQEIPVEQK	NGFPHPEPDC[57.0215]NPS[79.9663]EAAS[79.9663]EES[79.9663]NSEIEQEIPVEQK	K	E	84	116	33	3	10C(57.0215),13S(79.9663),17S(79.9663),20S(79.9663)	sp|Q9NR30-2|DDX21_HUMAN	Q9NR30-2	DDX21_HUMAN	DDX21	Isoform 2 of Nucleolar RNA helicase 2		sp|Q9NR30|DDX21_HUMAN	4	0	MS/MS	STY:79.9663@NGFPHPEPDCNPS(0.7500)EAAS(0.7500)EES(0.7500)NS(0.7500)EIEQEIPVEQK;
NGILASPQSAPGNLDNSK	NGILAS[79.9663]PQSAPGNLDNSK	R	S	255	272	18	2	6S(79.9663)	sp|Q9Y6M7-11|S4A7_HUMAN	Q9Y6M7-11	S4A7_HUMAN	SLC4A7	Isoform 11 of Sodium bicarbonate cotransporter 3		sp|Q9Y6M7-13|S4A7_HUMAN, sp|Q9Y6M7-14|S4A7_HUMAN, sp|Q9Y6M7-2|S4A7_HUMAN, sp|Q9Y6M7-3|S4A7_HUMAN, sp|Q9Y6M7-4|S4A7_HUMAN, sp|Q9Y6M7-6|S4A7_HUMAN, sp|Q9Y6M7-9|S4A7_HUMAN	1	0	MS/MS	STY:79.9663@NGILAS(0.7100)PQS(0.1545)APGNLDNS(0.1356)K;
NGSLDSPGKQDTEEDEEEDEK	NGSLDSPGKQDT[79.9663]EEDEEEDEK	K	D	134	154	21	3	12T(79.9663)	sp|Q9Y266|NUDC_HUMAN	Q9Y266	NUDC_HUMAN	NUDC	Nuclear migration protein nudC			1	1.1537857E7	MS/MS	STY:79.9663@NGS(0.0470)LDS(0.0470)PGKQDT(0.9061)EEDEEEDEK;
NGSLDSPGKQDTEEDEEEDEK	NGSLDS[79.9663]PGKQDTEEDEEEDEK	K	D	134	154	21	3	6S(79.9663)	sp|Q9Y266|NUDC_HUMAN	Q9Y266	NUDC_HUMAN	NUDC	Nuclear migration protein nudC			1	1.1537857E7	MS/MS	STY:79.9663@NGS(0.1318)LDS(0.8198)PGKQDT(0.0484)EEDEEEDEK;
NGSTAVAESVASPQK	NGSTAVAES[79.9663]VASPQK	K	T	1022	1036	15	2	9S(79.9663)	sp|Q12888-2|TP53B_HUMAN	Q12888-2	TP53B_HUMAN	TP53BP1	Isoform 2 of TP53-binding protein 1		sp|Q12888-3|TP53B_HUMAN, sp|Q12888|TP53B_HUMAN	1	1.26916e+06	MS/MS	STY:79.9663@NGS(0.0343)T(0.0344)AVAES(0.4656)VAS(0.4656)PQK;
NGSCGVSYIAQEPGNYEVSIK	NGS[79.9663]C[57.0215]GVS[79.9663]Y[79.9663]IAQEPGNYEVSIK	K	F	2221	2241	21	3	3S(79.9663),4C(57.0215),7S(79.9663),8Y(79.9663)	sp|O75369-2|FLNB_HUMAN	O75369-2	FLNB_HUMAN	FLNB	Isoform 2 of Filamin-B		sp|O75369-3|FLNB_HUMAN, sp|O75369-6|FLNB_HUMAN, sp|O75369-7|FLNB_HUMAN, sp|O75369-8|FLNB_HUMAN, sp|O75369-9|FLNB_HUMAN, sp|O75369|FLNB_HUMAN	1	2.4770908E7	MS/MS	STY:79.9663@NGS(0.6000)CGVS(0.6000)Y(0.6000)IAQEPGNY(0.6000)EVS(0.6000)IK;
NGSEADIDEGLYSR	NGS[79.9663]EADIDEGLYSR	K	Q	4	17	14	2	3S(79.9663)	sp|P22314-2|UBA1_HUMAN	P22314-2	UBA1_HUMAN	UBA1	Isoform 2 of Ubiquitin-like modifier-activating enzyme 1		sp|P22314|UBA1_HUMAN	1	0	MS/MS	STY:79.9663@NGS(0.9169)EADIDEGLY(0.0415)S(0.0415)R;
NGSLDSPGKQDTEEDEEEDEK	NGS[79.9663]LDSPGKQDTEEDEEEDEK	K	D	134	154	21	2,3	3S(79.9663)	sp|Q9Y266|NUDC_HUMAN	Q9Y266	NUDC_HUMAN	NUDC	Nuclear migration protein nudC			5	1.1537857E7	MS/MS	STY:79.9663@NGS(0.4076)LDS(0.4076)PGKQDT(0.1849)EEDEEEDEK;
NGVAAEVSPAK	NGVAAEVS[79.9663]PAK	K	E	118	128	11	2	8S(79.9663)	sp|Q9BW71|HIRP3_HUMAN	Q9BW71	HIRP3_HUMAN	HIRIP3	HIRA-interacting protein 3			1	1827426	MS/MS	STY:79.9663@NGVAAEVS(1.0000)PAK;
[truncated: 1,153 more rows]

## Sheet: 100cells_2_MSFragger
Peptide Sequence	Modified Sequence	Prev AA	Next AA	Start	End	Peptide Length	Charges	Assigned Modifications	Protein	Protein ID	Entry Name	Gene	Protein Description	Mapped Genes	Mapped Proteins	cell2_3 Spectral Count	cell2_3 Intensity	cell2_3 Match Type	cell2_3 Localization
[truncated: 1,916 more rows]

[truncated: 6 more sheets: 100cells_3_MSFragger, 100cells_1_PD, 100cells_2_PD, 100cells_3_PD, phosphoprotein, phosphosite]
