# Supplementary material for: Unlocking Ultrasensitive Phosphoproteomics of Nanoscale Samples: A Rapid IMAC Enrichment Platform Using Ti-PAN Tip
Source: Research Square preprint supplement (doi:10.21203/rs.3.rs-8623740/v1), 2026-01-28
Supplement: Supplementary file 9 [file 9a806ea30a915ec128ccef1c.xlsx]

## Sheet: phosphosite
Index	Gene	Protein	Protein ID	Peptide	Best Localization Probability	05_3_3 Localization Probability	1_3_6 Localization Probability	2_1_8 Localization Probability	2_2_9 Localization Probability	2_3 Localization Probability	GVBD_1 Localization Probability	GVBD_2 Localization Probability	GVBD_3 Localization Probability	GVBD_4 Localization Probability	GVBD_5 Localization Probability	GV_1 Localization Probability	GV_2 Localization Probability	GV_3 Localization Probability	GV_4 Localization Probability	GV_5 Localization Probability	MI_1 Localization Probability	MI_2 Localization Probability	MI_3 Localization Probability	MI_4 Localization Probability	MI_5 Localization Probability	05_3_3 Intensity	1_3_6 Intensity	2_1_8 Intensity	2_2_9 Intensity	2_3 Intensity	GVBD_1 Intensity	GVBD_2 Intensity	GVBD_3 Intensity	GVBD_4 Intensity	GVBD_5 Intensity	GV_1 Intensity	GV_2 Intensity	GV_3 Intensity	GV_4 Intensity	GV_5 Intensity	MI_1 Intensity	MI_2 Intensity	MI_3 Intensity	MI_4 Intensity	MI_5 Intensity	05_3_3 MaxLFQ Intensity	1_3_6 MaxLFQ Intensity	2_1_8 MaxLFQ Intensity	2_2_9 MaxLFQ Intensity
A1A5B6_S560	Tbc1d25	sp|A1A5B6|TBC25_MOUSE	A1A5B6	QAsLDGLQQLR	1	1	0	0	0	0	0	0	0	0	0	0	0	0	0	0	0	0	0	0	0	103953	0	70264.7	0	68284.9	0	0	0	0	0	0	0	0	0	0	0	0	0	0	0	103953	0	70264.7	0
A2A432_S192	Cul4b	sp|A2A432|CUL4B_MOUSE	A2A432	MAEEsSSSSSSSSPTAATSQQQQQQQLK	0.7629	0.0982	0.2637	0.0993	0.0833	0.7629	0	0	0	0.091	0.0897	0	0	0	0	0	0.0833	0.0833	0.1076	0.0833	0.0833	0	644190	754884	509914	1.03191e+06	0	0	0	237748	377292	0	0	0	0	0	590811	760277	707146	735016	642838	0	644190	754884	509914
A2ADY9_S127	Ddi2	sp|A2ADY9|DDI2_MOUSE	A2ADY9	TQAQHSSPGEMAsSPQGLDNPALLR;TQAQHSSPGEMAssPQGLDNPALLR	0.8675	0	0	0.712	0.4233	0.8675	0.3243	0.4146	0.4588	0	0	0	0	0	0	0	0	0	0	0.3948	0	0	0	892400	150218	571606	158565	233686	222254	166676	0	0	0	0	0	0	0	0	0	305622	0	0	0	892400	139093
A2ADY9_S128	Ddi2	sp|A2ADY9|DDI2_MOUSE	A2ADY9	TQAQHSSPGEMAssPQGLDNPALLR;tQAQHSSPGEMASsPQGLDNPALLR	0.8675	0.8582	0	0.712	0	0.8675	0	0	0	0	0	0	0	0	0	0	0	0	0	0	0	891558	0	892400	0	571606	0	0	0	0	0	0	0	0	0	0	0	0	0	0	0	0	0	892400	0
A2ADY9_T115	Ddi2	sp|A2ADY9|DDI2_MOUSE	A2ADY9	tQAQHSSPGEMASsPQGLDNPALLR	0.8615	0.8615	0	0	0	0	0	0	0	0	0	0	0	0	0	0	0	0	0	0	0	891558	0	0	0	0	0	0	0	0	0	0	0	0	0	0	0	0	0	0	0	0	0	0	0
A2AHC3_S1069	Camsap1	sp|A2AHC3|CAMP1_MOUSE	A2AHC3	APVHFVEPLsPTGVPGHR	0.9131	0	0	0	0	0.5	0	0	0	0	0	0	0	0	0	0	0	0	0	0	0	98838.6	0	0	3.24462e+06	109344	0	0	0	0	0	0	0	0	0	0	0	0	0	0	0	98838.6	0	0	3.24462e+06
A2AN08_S178	Ubr4	sp|A2AN08|UBR4_MOUSE	A2AN08	ELAsPVSPELR;ELAsPVsPELR	1	0	1	0.5	0.5	1	0	0	0	0	0	0	0	0	0	0	0	0.9141	0	0.5	0	370146	481960	617894	362742	901476	0	54371.9	0	130526	0	0	0	0	0	0	184263	307188	184844	161791	204061	258390	322883	421378	245000
A2AN08_S181	Ubr4	sp|A2AN08|UBR4_MOUSE	A2AN08	ELAsPVsPELR	1	0	1	0	0	1	0	0	0	0	0	0	0	0	0	0	0	0	0	0	0	99661.3	157482	187703	114814	212576	0	0	0	0	0	0	0	0	0	0	0	0	0	0	0	99661.3	157482	187703	114814
A2AN08_S619	Ubr4	sp|A2AN08|UBR4_MOUSE	A2AN08	AAPPPPPPPPPLEsSPR	0.8554	0.5	0	0.5	0.5	0.5	0	0.5	0.5	0.5	0	0	0	0	0.8554	0.5	0.5	0.5	0.5	0	0.5	104270	73510.4	213454	207739	199089	253602	316885	384498	282538	227290	377817	343622	531913	147984	158825	228862	329313	369863	350928	397690	104270	73510.4	213454	207739
A2AN08_T2712	Ubr4	sp|A2AN08|UBR4_MOUSE	A2AN08	HVtLPSSPR	0.9285	0	0	0.3333	0	0.3333	0.3333	0.3333	0.3333	0	0.3333	0	0.9281	0	0.3333	0.3333	0.3333	0.3333	0	0.3333	0.3333	48976.8	82877.7	103325	82877.6	80121.4	160904	233917	196369	0	153861	499023	363404	205873	200799	190728	185818	246102	192598	226911	280047	48976.8	82877.7	103325	82877.6
A2APB8_S737	Tpx2	sp|A2APB8|TPX2_MOUSE	A2APB8	SSELPLTVPVsPK	0.9188	0.9188	0	0.3462	0	0	0	0	0	0	0	0	0	0	0	0	0	0	0	0	0	141455	0	231271	0	0	0	0	0	0	0	0	0	0	0	0	0	0	0	0	0	141455	0	231271	0
A2APB8_T733	Tpx2	sp|A2APB8|TPX2_MOUSE	A2APB8	SSELPLtVPVSPK	0.8962	0.8525	0.3536	0	0.3979	0	0	0	0	0	0	0	0	0	0	0	0	0	0	0.4828	0	141455	123501	0	0	0	0	0	0	0	0	0	0	0	0	0	0	0	0	0	0	141455	123501	0	0
A2TJV2_S451	Palm3	sp|A2TJV2|PALM3_MOUSE	A2TJV2	KDsEGPFPAEIATDEEK	0.9135	0	0	0	0	0	0	0	0	0	0	0	0	0	0.5	0	0	0	0	0	0	0	0	0	0	0	0	21138.5	0	0	0	0	160338	0	94850.9	72992.1	0	0	0	0	0	0	0	0	0
B1AZA5_T331	Tmem245	sp|B1AZA5|TM245_MOUSE	B1AZA5	SSPSSPSPtLGR	0.8447	0	0	0	0	0	0	0	0	0	0	0	0	0	0	0	0	0	0.8447	0	0	0	0	0	0	0	0	0	0	0	0	0	0	0	0	0	239927	308869	315039	0	0	0	0	0	0
B1AZP2_S909	Dlgap4	sp|B1AZP2|DLGP4_MOUSE	B1AZP2	ANsWQLVETPEK	0.9237	0.7146	0.5	0.6054	0.8909	0.5	0	0	0	0	0	0	0	0	0	0	0	0	0	0	0	1.85622e+06	444862	2.23877e+06	2.13161e+06	3.05177e+06	0	0	0	0	0	0	0	0	0	0	0	0	0	0	0	780633	725076	946711	954983
B1AZP2_S973	Dlgap4	sp|B1AZP2|DLGP4_MOUSE	B1AZP2	QNsATESADSIEIYVPEAQTR	0.8906	0.1991	0.2477	0.4602	0.312	0.321	0.3209	0.3722	0.2359	0.2448	0.2104	0.8906	0.3081	0.2373	0.2459	0.1667	0.1667	0.4478	0.4701	0.2954	0.1667	1.18611e+06	815168	1.39539e+06	1.06299e+06	1.19884e+06	623206	693379	682721	367648	499134	523739	586358	507072	330179	228999	575885	943542	727578	748514	749694	1.18611e+06	815168	1.39539e+06	1.06299e+06
B1AZP2_S980	Dlgap4	sp|B1AZP2|DLGP4_MOUSE	B1AZP2	QNSATESADsIEIYVPEAQTR	0.8507	0	0	0	0	0.7281	0	0	0	0.2988	0	0	0	0	0	0	0	0	0	0	0	0	0	0	0	1.19884e+06	0	0	0	367648	0	0	0	0	0	0	0	0	0	0	0	0	0	0	0
B1AZP2_T915	Dlgap4	sp|B1AZP2|DLGP4_MOUSE	B1AZP2	ANSWQLVEtPEK	0.9411	0.9294	0.6627	0.9373	0.937	0.9278	0	0	0	0	0	0	0	0	0	0	0	0	0	0	0	1.85622e+06	1.57346e+06	2.23877e+06	1.98643e+06	2.23422e+06	0	0	0	0	0	0	0	0	0	0	0	0	0	0	0	1.30657e+06	1.11433e+06	1.5768e+06	1.38548e+06
B1B0V2_S20	Ezhip	sp|B1B0V2|EZHIP_MOUSE	B1B0V2	ASSSSPERGLEALRDTDEsEGEAPGPSGPR;DTDEsEGEAPGPSGPR;GLEALRDTDEsEGEAPGPSGPR;GLEALRDTDEsEGEAPGPsGPR;GLEALRDtDEsEGEAPGPSGPR	0.9456	0.9434	0.9411	0.9268	0.6803	0.9454	0	0	0	0	0	0	0	0	0	0	0	0	0	0	0	884068	1649539	1.0728e+06	676114	1814729	0	0	0	0	0	0	0	0	0	0	0	135342	0	0	0	658900	1.05259e+06	1.13719e+06	716699
B1B0V2_S201	Ezhip	sp|B1B0V2|EZHIP_MOUSE	B1B0V2	SSTSQGsGSTPVPEALR	0.8901	0.3215	0	0	0.5443	0.3015	0	0	0	0	0	0	0	0	0	0	0	0	0	0	0	1.56551e+06	0	0	695295	2.88415e+06	0	0	0	0	0	0	0	0	0	0	0	0	0	0	0	1.56551e+06	0	0	695295
B1B0V2_S224	Ezhip	sp|B1B0V2|EZHIP_MOUSE	B1B0V2	AESDQSsPAGR	0.802	0	0	0	0.802	0	0	0	0	0	0	0	0	0	0	0	0	0	0	0	0	0	0	0	644289	0	0	0	0	0	0	0	0	0	0	0	0	0	0	0	0	0	0	0	0
B1B0V2_S235	Ezhip	sp|B1B0V2|EZHIP_MOUSE	B1B0V2	QQAsPRAPDDDDDGDGGPDPR	1	1	1	1	1	1	0	0	0	0	0	0	0	0	0	0	0	0	0	0	0	439898	753143	753307	0	1.21509e+06	0	0	0	0	0	0	0	0	0	0	0	0	0	0	0	439898	753143	753307	0
B1B0V2_S254	Ezhip	sp|B1B0V2|EZHIP_MOUSE	B1B0V2	GsGTPEGWVLR	0.9258	0.5	0.5	0.5	0.5	0.75	0	0	0	0	0	0	0	0	0	0	0	0	0	0	0	2092275	1.41039e+06	2.00255e+06	1961976	3001394	0	0	0	0	0	0	0	0	0	0	0	0	0	0	0	2092275	1.41039e+06	2.00255e+06	1961976
B1B0V2_S28	Ezhip	sp|B1B0V2|EZHIP_MOUSE	B1B0V2	GLEALRDTDESEGEAPGPsGPR;GLEALRDTDEsEGEAPGPsGPR	0.8643	0	0	0	0	0	0	0	0	0	0	0	0	0	0	0	0	0	0	0	0	0	0	0	0	0	0	0	0	0	0	0	0	0	0	0	0	135342	0	0	0	0	0	0	0
B1B0V2_S303	Ezhip	sp|B1B0V2|EZHIP_MOUSE	B1B0V2	SSAsAVsPEAR;SSAsAVsPEARPK;SsAsAVSPEARPK	0.8214	0.7477	0.7692	0	0	0	0	0	0	0	0	0	0	0	0	0	0	0	0	0	0	1.13653e+06	247477	0	0	0	0	0	0	0	0	0	0	0	0	0	0	0	0	0	0	503744	408388	0	0
B1B0V2_S306	Ezhip	sp|B1B0V2|EZHIP_MOUSE	B1B0V2	SSASAVsPEAR;SSASAVsPEARPK;SSAsAVsPEAR;SSAsAVsPEARPK	0.927	0.7477	0.7692	0.8044	0	0.927	0	0	0	0	0	0	0	0	0	0	0	0	0	0	0	1363382	247477	0	0	540903	0	0	0	0	0	0	0	0	0	0	0	0	0	0	0	994384	806098	0	0
B1B0V2_S326	Ezhip	sp|B1B0V2|EZHIP_MOUSE	B1B0V2	sSASVVSPEARPK;ssASVVSPEARPK	0.8982	0.5	0.5	0.5656	0.8982	0.5	0	0	0	0	0	0	0	0	0	0	0	0	0	0	0	1.66878e+06	2.07891e+06	1.99123e+06	1358431	2.93451e+06	0	0	0	0	0	0	0	0	0	0	0	0	0	0	0	944298	1171853	1.17347e+06	840928
B1B0V2_S327	Ezhip	sp|B1B0V2|EZHIP_MOUSE	B1B0V2	ssASVVSPEARPK	0.8982	0.5	0.5	0.5656	0.8982	0.5	0	0	0	0	0	0	0	0	0	0	0	0	0	0	0	832494	1.02918e+06	1.08144e+06	832494	1.16919e+06	0	0	0	0	0	0	0	0	0	0	0	0	0	0	0	832494	1.02918e+06	1.08144e+06	832494
B1B0V2_S329	Ezhip	sp|B1B0V2|EZHIP_MOUSE	B1B0V2	SSAsVVsPEAR;SSAsVVsPEARPK	0.897	0	0	0.85	0.5412	0	0	0	0	0	0	0	0	0	0	0	0	0	0	0	0	0	0	1.08144e+06	0	0	0	0	0	0	0	0	0	0	0	0	0	0	0	0	0	0	0	0	0
B1B0V2_S332	Ezhip	sp|B1B0V2|EZHIP_MOUSE	B1B0V2	SSASVVsPEAR;SSASVVsPEARPK;SSAsVVsPEAR;SSAsVVsPEARPK	0.9371	0	0.9225	0.908	0.9163	0.9327	0	0	0	0	0	0	0	0	0	0	0	0	0	0	0	0	1.04973e+06	1.6994e+06	859072	2390671	0	0	0	0	0	0	0	0	0	0	0	0	0	0	0	0	1.08657e+06	837718	889223
B1B0V2_S367	Ezhip	sp|B1B0V2|EZHIP_MOUSE	B1B0V2	SSASVVSPEARPEAQsAGR	0.9285	0	0	0	0	0.9285	0	0	0	0	0	0	0	0	0	0	0	0	0	0	0	615218	0	1354924	0	1.93251e+06	0	0	0	0	0	0	0	0	0	0	0	0	0	0	0	615218	0	1354924	0
B1B0V2_S385	Ezhip	sp|B1B0V2|EZHIP_MOUSE	B1B0V2	VPVAPsSTTR	0.9383	0.25	0.8686	0.9274	0.25	0.25	0	0	0	0	0	0	0	0	0	0	0	0	0	0	0	1.5056e+06	1.79751e+06	1.65505e+06	1.51006e+06	1.45661e+06	0	0	0	0	0	0	0	0	0	0	0	0	0	0	0	1.5056e+06	1.79751e+06	1.65505e+06	1.51006e+06
B1B0V2_S416	Ezhip	sp|B1B0V2|EZHIP_MOUSE	B1B0V2	LGsDHQR	1	0	0	0	1	0	0	0	0	0	0	0	0	0	0	0	0	0	0	0	0	0	69001.7	0	477850	366193	0	0	0	0	0	0	0	0	0	0	0	0	0	0	0	0	69001.7	0	477850
B1B0V2_S438	Ezhip	sp|B1B0V2|EZHIP_MOUSE	B1B0V2	EPEsEAEQEEQELESEPGPSSR;LDLQVDREPEsEAEQEEQELESEPGPSSR;LDLQVDREPEsEAEQEEQELESEPGPSSRPQASR	0.9314	0.6961	0.25	0.3253	0.25	0.9281	0	0	0	0	0	0	0	0	0	0	0	0	0	0	0	418489	212210	555662	718885	718094	0	0	0	0	0	0	0	0	0	0	0	0	0	0	0	769154	390028	404653	998150
B1B0V2_S479	Ezhip	sp|B1B0V2|EZHIP_MOUSE	B1B0V2	SSLAAEDsPPR;SsLAAEDsPPR	0.9369	0.9037	0.8294	0.924	0.9297	0.8808	0	0	0	0	0	0	0	0	0	0	0	0	0	0	0	261374	248198	265909	261504	380995	0	0	0	0	0	0	0	0	0	0	0	0	0	0	0	261374	248198	265909	261504
B1B0V2_S490	Ezhip	sp|B1B0V2|EZHIP_MOUSE	B1B0V2	AssPSPPGR	0.9164	0.6667	0.6667	0.6667	0.6667	0.9164	0	0	0	0	0	0	0	0	0	0	0	0	0	0	0	1.8518e+06	1451673	2.19672e+06	1.1735e+06	1.67637e+06	0	0	0	0	0	0	0	0	0	0	0	0	0	0	0	1.8518e+06	1451673	2.19672e+06	1.1735e+06
B1B0V2_S491	Ezhip	sp|B1B0V2|EZHIP_MOUSE	B1B0V2	ASsPsPPGR;AssPSPPGR	0.9164	0.6667	0.6667	0.6667	0.6667	0.9164	0	0	0	0	0	0	0	0	0	0	0	0	0	0	0	1.8518e+06	1451673	2.19672e+06	1.1735e+06	3.35273e+06	0	0	0	0	0	0	0	0	0	0	0	0	0	0	0	1.8518e+06	1451673	2.19672e+06	1.1735e+06
B1B0V2_S493	Ezhip	sp|B1B0V2|EZHIP_MOUSE	B1B0V2	ASsPsPPGR	0.8849	0	0	0	0	0.8848	0	0	0	0	0	0	0	0	0	0	0	0	0	0	0	0	0	0	0	1.67637e+06	0	0	0	0	0	0	0	0	0	0	0	0	0	0	0	0	0	0	0
B1B0V2_T104	Ezhip	sp|B1B0V2|EZHIP_MOUSE	B1B0V2	ELGLtPK	1	0	0	1	1	1	0	0	0	0	0	0	0	0	0	0	0	0	0	0	0	175107	352087	235461	167500	377945	0	0	0	0	0	0	0	0	0	0	0	55888.7	61683.3	0	0	175107	352087	235461	167500
B1B0V2_T128	Ezhip	sp|B1B0V2|EZHIP_MOUSE	B1B0V2	GGSGSPPHtK	0.8396	0	0	0	0.8396	0	0	0	0	0	0	0	0	0	0	0	0	0	0	0	0	0	0	51523	316658	0	0	0	0	0	0	0	0	0	0	0	0	0	0	0	0	0	0	51523	316658
B1B0V2_T17	Ezhip	sp|B1B0V2|EZHIP_MOUSE	B1B0V2	ASSSSPERGLEALRDtDESEGEAPGPSGPR;DtDESEGEAPGPSGPR;GLEALRDtDESEGEAPGPSGPR;GLEALRDtDEsEGEAPGPSGPR	0.9456	0.9434	0.9411	0.9268	0.6803	0.9454	0	0	0	0	0	0	0	0	0	0	0	0	0	0	0	669918	1.36997e+06	1933395	1473647	4714347	0	0	0	0	0	0	0	0	0	0	0	0	0	0	0	790790	996602	1.63644e+06	1.25061e+06
B1B0V2_T204	Ezhip	sp|B1B0V2|EZHIP_MOUSE	B1B0V2	SSTSQGSGStPVPEALR	0.9262	0	0.8627	0	0.9262	0	0	0	0	0	0	0	0	0	0	0	0	0	0	0	0	0	1.40194e+06	0	2.35421e+06	0	0	0	0	0	0	0	0	0	0	0	0	0	0	0	0	0	1.40194e+06	0	2.35421e+06
B1B0V2_T256	Ezhip	sp|B1B0V2|EZHIP_MOUSE	B1B0V2	GSGtPEGWVLR	0.9217	0.819	0	0	0	0.9217	0	0	0	0	0	0	0	0	0	0	0	0	0	0	0	2092275	0	0	0	3001394	0	0	0	0	0	0	0	0	0	0	0	0	0	0	0	2092275	0	0	0
B2RRE7_S1016	Otud4	sp|B2RRE7|OTUD4_MOUSE	B2RRE7	LQRPKEEssEDENEVSNILR	0.8945	0	0	0	0	0	0	0	0	0	0	0.6667	0	0	0.8945	0	0	0.6667	0	0.6698	0	0	0	0	0	0	0	0	0	0	0	576181	279747	0	180336	171891	227605	234435	0	176810	208913	0	0	0	0
B2RRE7_S1017	Otud4	sp|B2RRE7|OTUD4_MOUSE	B2RRE7	LQRPKEEssEDENEVSNILR	0.8945	0	0	0	0	0	0	0	0	0	0	0.6667	0	0	0.8945	0	0	0.6667	0	0.6698	0	0	0	0	0	0	0	0	0	0	0	576181	279747	0	180336	171891	227605	234435	0	176810	208913	0	0	0	0
B2RUJ5_S317	Apba1	sp|B2RUJ5|APBA1_MOUSE	B2RUJ5	APTPGGGHPDsPGLPAPAGQQQR;APtPGGGHPDsPGLPAPAGQQQR	1	0	0	0	0	0	0	0	0	0.7431	0	0	0	0	0	0	0	0	0	0	0	0	0	0	0	0	236368	0	207162	180747	186228	0	0	0	0	0	0	0	0	0	224423	0	0	0	0
B2RUJ5_T309	Apba1	sp|B2RUJ5|APBA1_MOUSE	B2RUJ5	APtPGGGHPDSPGLPAPAGQQQR;APtPGGGHPDsPGLPAPAGQQQR	1	0	0	0	0.5	0	0.5	0.5	0	0	0.5	0	0	0	0	0	0.5	0.5	0.5	0.8362	0	0	0	0	46888.9	0	0	143666	0	180747	0	0	0	0	0	0	209669	251945	220820	208069	0	0	0	0	46888.9
B2RUJ5_T333	Apba1	sp|B2RUJ5|APBA1_MOUSE	B2RUJ5	VVGtPGGSEVGQR	0.9364	0	0.9363	0.9364	0.5	0	0	0	0	0	0.595	0	0	0	0	0	0	0	0	0	0	0	209382	0	0	0	0	0	0	0	0	0	0	0	0	0	0	0	0	0	0	0	0	0	0
B9EJ86_S26	Osbpl8	sp|B9EJ86|OSBL8_MOUSE	B9EJ86	DVLGPsTVVANSDEPQHLTPGK	0.8173	0.25	0.25	0.25	0	0.4477	0.2737	0.25	0.25	0.25	0.3104	0	0	0	0	0.25	0	0	0.25	0.25	0.25	875970	948134	1.37183e+06	0	1.35348e+06	815680	989028	933287	1.13319e+06	719012	435534	349529	482466	261920	288861	0	0	981574	1.47713e+06	1128747	875970	948134	1.37183e+06	0
B9EJ86_S32	Osbpl8	sp|B9EJ86|OSBL8_MOUSE	B9EJ86	DVLGPSTVVANsDEPQHLTPGK	0.8265	0.4294	0	0	0.8261	0	0	0.4708	0	0	0	0	0	0	0	0	0.4669	0.4307	0.4174	0.4536	0	1.18755e+06	0	0	1002134	0	0	989028	0	0	0	0	0	0	0	0	1.25438e+06	731242	981574	1.04634e+06	0	870634	0	0	722915
B9EJ86_T39	Osbpl8	sp|B9EJ86|OSBL8_MOUSE	B9EJ86	DVLGPSTVVANSDEPQHLtPGK	0.9316	0.9288	0.8101	0	0.8764	0.8658	0	0	0.7338	0.6059	0.4431	0	0	0	0	0	0.8756	0.9032	0	0	0	875970	948134	1.22422e+06	701405	1.35348e+06	0	0	933287	1.13319e+06	719012	0	0	0	0	0	1.25438e+06	731242	0	0	0	875970	948134	1.22422e+06	701405
C3VD30_S183	Zar1l	sp|C3VD30|ZAR1L_MOUSE	C3VD30	ELGEEYAHsPQDR	0.9254	0	0.8775	0	0	0.5928	0	0	0	0	0	0	0	0	0	0	0	0.5751	0.8048	0	0	0	286661	0	0	247294	0	0	0	0	0	0	0	0	0	0	0	209676	159071	177523	154088	0	286661	0	0
C3VD30_Y180	Zar1l	sp|C3VD30|ZAR1L_MOUSE	C3VD30	ELGEEyAHSPQDR	0.7708	0	0.5	0	0	0	0	0	0	0	0	0	0	0	0	0	0	0.6117	0	0	0	0	219993	205113	111293	215508	0	0	0	0	0	0	0	0	0	0	0	0	0	0	0	0	219993	205113	111293
D3YXK2_S366	Safb	sp|D3YXK2|SAFB1_MOUSE	D3YXK2	APTAALsPEPQDSK	0.9383	0.4585	0	0	0.5199	0.8866	0.9236	0.4845	0	0.4431	0	0	0	0	0	0	0	0.7421	0	0.4893	0.5449	367130	0	0	514605	425689	522451	518626	0	413755	0	0	0	0	0	0	0	492522	0	428451	479193	367130	0	0	514605
D3YZP9_S233	Ccdc6	sp|D3YZP9|CCDC6_MOUSE	D3YZP9	LDQPVsAPPSPR;LDQPVsAPPsPR	1	0.5	1	0.9155	0.5	1	0.9195	0.5	0.9297	0.8404	0.9327	0	0	0	0	0	0.5	0.5	0.8887	0.5	0.5	490405	951817	907832	785595	1.04455e+06	785737	734691	708363	742471	610761	0	0	0	0	0	826138	620980	913820	775029	773474	402808	786374	740976	585361
D3YZP9_S237	Ccdc6	sp|D3YZP9|CCDC6_MOUSE	D3YZP9	LDQPVSAPPsPR;LDQPVsAPPsPR	1	0.9308	1	0.917	0.9236	1	0.9183	0.9375	0.9297	0	0	0	0.8689	0	0	0	0	0.8651	0.9354	0.8576	0.906	490405	951817	907832	785595	1.04455e+06	785737	734691	708363	0	0	0	214511	238006	176906	297765	0	620980	913820	775029	773474	375317	743168	685997	518826
D3Z3I0_S63	Cdc20b	sp|D3Z3I0|CD20B_MOUSE	D3Z3I0	LsAEIPVASSPITTRWQLSPARDPEsSSSVEEGPPSHTPESLASGLK	0.791	0	0	0	0	0	0	0	0	0	0	0	0	0.791	0	0	0	0	0	0	0	0	0	0	0	0	0	0	0	0	0	0	4427441	4.03123e+06	0	0	0	0	0	0	0	0	0	0	0
D3Z3I0_S87	Cdc20b	sp|D3Z3I0|CD20B_MOUSE	D3Z3I0	LsAEIPVASSPITTRWQLSPARDPEsSSSVEEGPPSHTPESLASGLK	0.769	0	0	0	0	0	0	0	0	0	0	0	0	0.769	0	0	0	0	0	0	0	0	0	0	0	0	0	0	0	0	0	0	4427441	4.03123e+06	0	0	0	0	0	0	0	0	0	0	0
D3Z6Q9_S380	Bin2	sp|D3Z6Q9|BIN2_MOUSE	D3Z6Q9	DTPsPGDVVLR;GQTGKDtPsPGDVVLR	0.938	0	0.8637	0	0	0.9229	0	0	0	0	0	0	0	0	0	0	0.9128	0	0.8954	0.9143	0	0	912711	427888	0	745306	141365	221899	0	0	0	0	0	0	0	0	374479	0	914718	302747	259238	0	406346	385517	0
D3Z6Q9_T378	Bin2	sp|D3Z6Q9|BIN2_MOUSE	D3Z6Q9	DtPSPGDVVLR;GQTGKDtPsPGDVVLR	0.9305	0.5	0.8637	0.5	0.5	0.8582	0.5	0	0.5	0.5	0.5	0	0	0	0	0	0.5	0.5	0.5	0.5	0.5	359302	1309730	1.33799e+06	627237	1.19254e+06	153494	0	202029	151550	0	0	0	0	0	0	374479	349936	371047	364243	259238	369031	420833	517342	343790
E9PVA8_T1283	Gcn1	sp|E9PVA8|GCN1_MOUSE	E9PVA8	KCMLDAALAtLNAHGK	1	1	0	0	0	0	0	0	0	0	0	0	0	0	0	0	0	0	0	0	0	3875208	1.17657e+06	1.87139e+06	1590709	4.06649e+06	0	0	0	0	0	0	0	0	0	0	0	0	0	0	0	3875208	1.17657e+06	1.87139e+06	1590709
E9PYK3_S96	Parp4	sp|E9PYK3|PARP4_MOUSE	E9PYK3	NYDPLsPAPAAPPAER	0.9214	0.7367	0	0	0	0	0	0	0	0	0	0	0	0	0	0	0	0	0	0	0	111007	0	75131.2	138371	79205.9	0	0	0	0	0	0	0	0	0	0	0	0	0	0	0	111007	0	75131.2	138371
E9PYK3_Y92	Parp4	sp|E9PYK3|PARP4_MOUSE	E9PYK3	NyDPLSPAPAAPPAER	0.8838	0	0	0	0	0.7041	0	0	0	0	0	0	0	0	0	0	0	0	0	0	0	111007	0	0	0	79205.9	0	0	0	0	0	0	0	0	0	0	0	0	0	0	0	111007	0	0	0
E9Q137_S302	Tex264	sp|E9Q137|TX264_MOUSE	E9Q137	ELsTPERGEE	0.8468	0	0	0	0	0.5	0	0.8468	0	0	0.5	0	0	0	0	0	0.5	0.5	0	0.5	0	0	0	0	0	199893	0	0	0	0	0	0	0	0	0	0	0	0	0	210919	0	0	0	0	0
E9Q286_S68	Ice1	sp|E9Q286|ICE1_MOUSE	E9Q286	ENstLHHQVEQMLQK	1	0	0	0	0	0	0	0	0	1	0	0	0	0	0	0	0	0	0	0	0	0	0	0	0	0	0	0	0	1.2327e+06	0	0	0	0	0	0	0	0	0	0	0	0	0	0	0
E9Q286_T69	Ice1	sp|E9Q286|ICE1_MOUSE	E9Q286	ENstLHHQVEQMLQK	1	0	0	0	0	0	0	0	0	1	0	0	0	0	0	0	0	0	0	0	0	0	0	0	0	0	0	0	0	1.2327e+06	0	0	0	0	0	0	0	0	0	0	0	0	0	0	0
G5E829_S1155	Atp2b1	sp|G5E829|AT2B1_MOUSE	G5E829	IEDsEPHIPLIDDTDAEDDAPTK	0.9057	0	0	0	0	0	0	0	0.4853	0	0.7532	0.8514	0	0	0.5819	0	0	0	0	0	0	0	0	0	0	0	224452	284151	238695	159628	236414	439465	359314	454112	328123	0	216783	48622	130328	251006	212468	0	0	0	0
G5E870_S1020	Trip12	sp|G5E870|TRIPC_MOUSE	G5E870	DDsLDLSPQGR	0.7582	0	0.5	0.5	0	0.5	0	0	0	0	0	0	0	0	0	0	0	0	0	0	0	94489.6	126609	111120	66774.1	106588	0	0	0	0	0	0	0	0	0	0	0	0	0	0	0	94489.6	126609	111120	66774.1
O08638_T1951	Myh11	sp|O08638|MYH11_MOUSE	O08638	VIENtDGSEEEMDAR	0.8651	0.5	0.5	0.5	0.5	0.5	0	0.5	0	0.5	0	0	0	0	0	0	0	0.5	0.7916	0	0	0	409095	241055	403609	502562	0	230363	0	0	0	0	0	0	0	0	0	0	305972	0	0	0	328055	193303	323655
O08715_S176	Akap1	sp|O08715|AKAP1_MOUSE	O08715	GWPsPYAASGEK	0.9355	0.3333	0.3333	0.9284	0.3333	0.9355	0	0	0	0	0	0	0	0	0	0	0	0	0	0	0	349939	517215	328406	489265	464269	0	0	0	0	0	0	0	0	0	0	0	0	0	0	0	349939	517215	328406	489265
O08715_S181	Akap1	sp|O08715|AKAP1_MOUSE	O08715	GWPSPYAAsGEK	0.8235	0.8235	0	0	0	0	0	0	0	0	0	0	0	0	0	0	0	0	0	0	0	349939	0	0	0	0	0	0	0	0	0	0	0	0	0	0	0	0	0	0	0	0	0	0	0
O08715_S378	Akap1	sp|O08715|AKAP1_MOUSE	O08715	TGATAsPSAEALPPK	0.7787	0	0.303	0	0	0.7207	0	0.4779	0.7787	0	0.4119	0	0	0	0	0	0	0	0.4772	0.4798	0	0	333368	160357	155259	366666	0	459251	598178	0	533025	0	0	260417	277055	0	0	0	423405	749612	0	0	333368	160357	155259
O08715_S380	Akap1	sp|O08715|AKAP1_MOUSE	O08715	TGATASPsAEALPPK	0.9286	0	0	0	0.5015	0.5565	0.9286	0.6907	0	0	0.7311	0	0	0	0	0	0.4891	0.8697	0.3165	0.8159	0	150945	183015	153860	384140	205721	0	385379	352170	490234	196770	361407	0	0	250617	156982	404928	507194	423405	749612	0	150945	183015	153860	384140
O08715_T373	Akap1	sp|O08715|AKAP1_MOUSE	O08715	tGATASPSAEALPPK	0.8361	0.4601	0.3299	0.7288	0.7219	0.25	0.3075	0.3235	0.25	0.3095	0.4656	0	0	0	0	0	0.3253	0.3878	0.3257	0.3713	0.46	240998	364411	295668	384140	366666	252031	0	598178	491795	463258	384824	0	0	0	220508	475337	802095	646729	749612	788662	240998	364411	295668	384140
O08808_S22	Diaph1	sp|O08808|DIAP1_MOUSE	O08808	GRsPDELPATGGDGGK	0.9301	0	0.6889	0.5	0.9185	0.8871	0	0	0	0	0	0	0	0	0	0	0	0	0	0	0	0	401922	271014	298511	337063	0	0	0	0	0	0	0	0	0	0	0	0	0	0	0	0	401922	271014	298511
O08808_T29	Diaph1	sp|O08808|DIAP1_MOUSE	O08808	GRSPDELPAtGGDGGK	0.854	0.534	0	0.5331	0.6894	0	0	0	0	0	0	0	0	0	0	0	0	0	0	0	0	356621	0	271014	298511	0	0	0	0	0	0	0	0	0	0	0	0	0	0	0	0	356621	0	271014	298511
O35280_S301	Chek1	sp|O35280|CHK1_MOUSE	O35280	HIHSNLDFsPVNNGSSEETVK	0.877	0	0	0	0	0.8442	0	0	0	0	0	0	0	0	0	0	0	0	0	0	0	136497	0	0	364207	367388	0	0	0	0	0	0	0	0	0	0	0	0	0	0	0	136497	0	0	364207
O35326_S165	Srsf5	sp|O35326|SRSF5_MOUSE	O35326	NAIEKLsGK	1	0	0	0	0	0	0	0	0	0	0	0	0	0	1	0	0	0	0	0	0	0	0	0	0	0	572099	842681	634341	753995	599603	570428	326477	297219	378529	523954	0	0	0	0	0	0	0	0	0
O35685_S136	Nudc	sp|O35685|NUDC_MOUSE	O35685	NGsLDSPGK;NGsLDSPGKQDAEDEEDEEDEK;NGsLDsPGKQDAEDEEDEEDEK	1	0.5	0.5	0.5138	0.8004	1	0.6319	0.5	0.5	0.5	0.6676	0.5	0	0.5	0.5	0.5	0.5	0.7568	0.7691	0.8203	0.7992	4.0759e+06	5.92518e+06	6157714	6628584	4.95636e+06	1.41362e+06	1.80412e+06	1.32896e+06	1.27523e+06	1.31705e+06	459397	0	0	402953	0	3.44053e+06	4.86942e+06	4.2883e+06	3.1494e+06	3.95032e+06	3.99199e+06	5.86415e+06	5.91396e+06	6.4201e+06
O35685_S139	Nudc	sp|O35685|NUDC_MOUSE	O35685	NGSLDsPGK;NGSLDsPGKQDAEDEEDEEDEK;NGsLDsPGKQDAEDEEDEEDEK	1	0.9255	0.5828	0.8608	0.9132	1	0	0	0	0	0	0	0	0	0	0	0.8153	0.9376	0.9165	0	0.9305	4.0759e+06	5.92518e+06	5.78938e+06	6072445	4940945	0	303717	1.32896e+06	491061	213978	0	342667	0	0	0	358502	4.86942e+06	4.2883e+06	0	3.95032e+06	4.10311e+06	6053398	4.48036e+06	4.74945e+06
O35685_T99	Nudc	sp|O35685|NUDC_MOUSE	O35685	AEtPGPQIK	1	1	1	1	1	1	0	1	1	1	1	0	0	0	0	0	1	1	1	1	0	776251	838985	464059	2020411	436074	191656	630596	580860	491045	584104	0	0	0	0	0	966956	647336	1.00899e+06	908484	0	536661	838985	464059	1.62426e+06
O35710_S43	Noct	sp|O35710|NOCT_MOUSE	O35710	sPQLQAAAASGAAR	0.9231	0	0.9007	0	0	0	0	0	0	0	0	0	0	0	0	0	0	0	0	0	0	0	191330	0	0	0	0	0	0	0	0	0	0	0	0	0	0	0	0	0	0	0	191330	0	0
O35737_S104	Hnrnph1	sp|O35737|HNRH1_MOUSE	O35737	HTGPNsPDTANDGFVR	0.77	0	0	0	0.759	0.4892	0	0	0	0	0	0	0	0	0	0	0	0	0	0	0	0	0	0	723545	564214	0	0	0	0	0	0	0	0	0	0	0	0	0	0	0	0	0	0	723545
O54692_S438	Zw10	sp|O54692|ZW10_MOUSE	O54692	EALPDLPsPDADHK	1	1	0	1	1	1	0	0	0	0	0	0	0	0	0	0	0	0	1	0	0	195304	323796	136672	303002	546626	0	0	0	0	0	0	0	0	0	0	0	182609	255824	307171	0	195304	323796	136672	254949
O54774_S784	Ap3d1	sp|O54774|AP3D1_MOUSE	O54774	VDIITEEMPENALPsDEDDKDPNDPYR	0.9113	0	0	0.4774	0.4586	0	0	0	0	0	0	0	0	0	0	0	0	0	0	0	0	0	0	0	399235	151922	0	0	0	0	0	0	0	0	0	0	0	0	0	0	0	0	0	0	399235
O54774_S825	Ap3d1	sp|O54774|AP3D1_MOUSE	O54774	NAEAVKsPEK	1	1	1	1	1	1	0	0	0	0	0	0	0	0	0	0	0	0	0	0	0	0	0	317367	38669.7	0	0	0	0	0	0	0	0	0	0	0	0	0	0	0	0	0	0	317367	38669.7
O54826_T340	Mllt10	sp|O54826|AF10_MOUSE	O54826	NPGtAVSASSPFPQGSFSGTPGSVK	0.834	0	0	0.125	0	0.125	0	0	0	0	0	0	0	0	0	0	0	0	0	0	0	0	0	122446	0	0	0	0	0	0	0	0	0	0	0	0	0	0	0	0	0	0	0	0	0
O55022_T190	Pgrmc1	sp|O55022|PGRC1_MOUSE	O55022	EGEEPTVYSDDEEPKDEtAR	0.9121	0	0	0	0	0	0	0	0	0	0	0	0	0	0	0	0	0	0	0.6009	0	0	0	0	0	0	254055	0	270465	276467	0	0	0	0	0	0	264555	0	0	379913	373256	0	0	0	0
O55029_S845	Copb2	sp|O55029|COPB2_MOUSE	O55029	GFQPsRPTAQQEPDGKPASSPVIMASQTTHK	0.8375	0	0	0	0	0	0	0.1429	0	0	0.1609	0	0	0	0	0	0.1529	0.1429	0	0.2443	0	0	0	0	0	0	0	383845	0	0	516845	0	0	0	0	0	664699	794354	0	905026	0	0	0	0	0
O55029_S859	Copb2	sp|O55029|COPB2_MOUSE	O55029	GFQPSRPTAQQEPDGKPAsSPVIMASQTTHK	0.8743	0	0	0	0.8743	0	0	0	0	0	0	0	0	0	0	0	0	0	0	0	0	0	0	0	1774022	0	0	0	0	0	0	0	0	0	0	0	0	0	0	0	0	0	0	0	1774022
O55029_T868	Copb2	sp|O55029|COPB2_MOUSE	O55029	GFQPSRPTAQQEPDGKPASSPVIMASQtTHK	0.774	0	0	0	0	0	0	0	0	0	0	0	0	0	0	0	0	0.448	0	0	0	0	0	0	0	0	0	0	0	0	0	0	0	0	0	0	0	274350	0	810618	320431	0	0	0	0
O55106_S239	Strn	sp|O55106|STRN_MOUSE	O55106	FLEsAAADVSDEDEDEDTDGR	0.8577	0.4862	0	0	0	0.4854	0	0	0	0	0	0	0	0	0	0	0	0	0	0.3333	0	186141	122356	0	107503	108006	0	0	0	0	0	0	0	0	0	0	0	0	0	0	0	186141	122356	0	107503
O55106_S245	Strn	sp|O55106|STRN_MOUSE	O55106	FLESAAADVsDEDEDEDTDGR	0.8874	0.7207	0	0	0	0	0	0	0	0	0	0	0	0	0	0	0	0	0	0	0	405462	0	0	0	0	0	0	0	0	0	0	0	0	0	0	0	0	0	0	0	405462	0	0	0
O55106_S259	Strn	sp|O55106|STRN_MOUSE	O55106	sVIDTSTIVR	0.9233	0	0.9128	0	0	0.9233	0	0	0	0	0	0	0	0	0	0	0	0	0	0	0	100864	99598.3	0	0	114798	0	0	0	0	0	0	0	0	0	0	0	0	0	0	0	100864	99598.3	0	0
O55106_S373	Strn	sp|O55106|STRN_MOUSE	O55106	DVDELPSLQPsVGSPSRPSSSR	0.8966	0.2415	0	0	0.4427	0	0	0	0.1658	0.4302	0.3017	0	0	0.4144	0	0	0	0	0	0.166	0.8966	1.53427e+06	0	0	1.81375e+06	0	0	0	1.107e+06	933857	589224	0	0	913849	0	0	988277	0	0	1.34941e+06	1.30367e+06	1.53427e+06	0	0	1.81375e+06
O55106_T253	Strn	sp|O55106|STRN_MOUSE	O55106	FLESAAADVSDEDEDEDtDGR	0.8825	0	0	0	0.8117	0	0	0	0	0	0	0	0	0	0	0	0	0	0	0	0	0	0	0	472032	0	0	0	0	0	0	0	0	0	0	0	0	0	0	0	0	0	0	0	472032
O55131_S333	Septin7	sp|O55131|SEPT7_MOUSE	O55131	sPLAQMEEER	1	0	0	0	0	0	0	0	0	0	0	0	0	0	0	0	0	0	0	0	0	0	0	0	0	0	0	0	0	0	0	0	0	0	0	0	0	0	0	64215.1	0	0	0	0	0
O55143_S661	Atp2a2	sp|O55143|AT2A2_MOUSE	O55143	EFDELsPSAQR	0.8992	0	0	0.5	0.5	0.6748	0	0	0	0	0	0	0	0	0	0	0	0.8365	0	0	0	117701	279015	193130	177778	302328	0	0	0	0	0	0	0	0	0	0	0	241890	0	177778	227169	117701	279015	193130	177778
O70251_S106	Eef1b	sp|O70251|EF1B_MOUSE	O70251	DDDDIDLFGsDDEEESEEAK;YGPSSVEDTTGSGAADAKDDDDIDLFGsDDEEESEEAK	0.934	0.7789	0.6439	0.5	0.7869	0.9256	0	0.8464	0	0.5	0	0	0	0	0	0	0	0	0	0	0	1110553	2.10573e+06	2.03098e+06	2.37044e+06	2562664	1.36444e+06	949364	1.49506e+06	0	0	0	0	0	0	0	1.25849e+06	0	385064	0	0	1.92471e+06	1.26786e+06	1.22733e+06	1.40112e+06
O70251_S112	Eef1b	sp|O70251|EF1B_MOUSE	O70251	DDDDIDLFGSDDEEEsEEAK;YGPSSVEDTTGSGAADAKDDDDIDLFGSDDEEEsEEAK	0.8094	0.8025	0.7813	0	0.6499	0	0	0	0	0	0.5897	0	0	0	0	0	0	0	0	0	0	1110553	1139902	0	527456	0	0	0	0	0	1.25086e+06	0	0	0	0	504202	1304904	0	0	0	0	3.72662e+06	3825105	0	1.76995e+06
O70318_S38	Epb41l2	sp|O70318|E41L2_MOUSE	O70318	EVENEQTPVsEPEEEK	0.9363	0	0.8081	0	0.881	0.9343	0	0	0	0	0	0	0	0	0	0	0	0	0	0	0	0	584512	0	0	0	0	0	0	0	0	0	0	0	0	0	0	0	0	0	0	0	0	0	0
O70318_S492	Epb41l2	sp|O70318|E41L2_MOUSE	O70318	LVsPEQPPK	1	0	0	1	0	0	0	0	0	0	0	0	0	0	0	0	0	0	0	0	0	83248.6	114267	129843	0	118358	0	0	0	0	0	0	0	0	0	0	0	0	0	0	0	83248.6	114267	129843	0
O70318_T35	Epb41l2	sp|O70318|E41L2_MOUSE	O70318	EVENEQtPVSEPEEEK	0.9209	0	0.5	0.5	0	0	0	0.5	0	0	0	0	0.5	0	0	0	0	0	0.5	0	0.5	0	584512	0	0	0	0	0	0	0	0	0	0	0	0	0	0	0	0	0	0	0	0	0	0
O70400_S90	Pdlim1	sp|O70400|PDLI1_MOUSE	O70400	IWsPLVTEEGK	0.937	0.5	0	0.8769	0.5	0.5	0	0	0	0	0	0	0	0	0	0	0	0	0	0	0	136636	0	257024	0	251802	0	0	0	0	0	0	0	0	0	0	0	0	0	0	0	136636	0	257024	0
O70435_S250	Psma3	sp|O70435|PSA3_MOUSE	O70435	ESLKEEDEsDDDNM	0.8913	0	0	0	0	0.8732	0	0	0	0	0	0	0	0	0	0	0	0	0	0	0	131824	266829	0	0	367400	0	0	0	0	0	0	0	0	0	0	0	0	0	0	0	131824	266829	0	0
O88487_T154	Dync1i2	sp|O88487|DC1I2_MOUSE	O88487	EDEEEEDDVAtPKPPVEPEEEK	1	1	1	0	1	1	0	1	0	0	0	0	0	0	0	0	1	0	1	0	0	477060	697041	512197	476839	460694	179951	245252	0	292390	0	0	0	0	0	0	465649	478688	473602	318733	381872	477060	697041	512197	476839
O88508_T257	Dnmt3a	sp|O88508|DNM3A_MOUSE	O88508	VEEASPPAVQQPTDPASPTVATtPEPVGGDAGDK	0.7751	0	0	0	0	0	0	0	0.7751	0	0	0	0	0	0	0	0	0	0	0	0	0	0	0	0	0	471878	0	507359	0	520361	0	0	0	0	0	0	0	0	0	0	0	0	0	0
O88559_S544	Men1	sp|O88559|MEN1_MOUSE	O88559	GGQEVGNAAQAPAPAAsPPPEGPVLTFQSEK	0.9293	0.9221	0.3333	0.9148	0.3333	0.3333	0	0	0	0	0	0	0	0	0	0	0	0.3333	0.8083	0.3333	0	879905	1.24784e+06	1.71386e+06	856851	497209	0	161942	0	0	160128	0	0	0	0	0	377193	289857	0	322721	275645	538396	818442	1.06771e+06	839618
O88559_S556	Men1	sp|O88559|MEN1_MOUSE	O88559	GGQEVGNAAQAPAPAASPPPEGPVLTFQsEK	0.8848	0	0	0	0	0.8848	0	0	0	0	0	0	0	0	0	0	0	0	0	0	0	0	0	0	0	497209	0	0	0	0	0	0	0	0	0	0	0	0	0	0	0	0	0	0	0
O88569_S259	Hnrnpa2b1	sp|O88569|ROA2_MOUSE	O88569	GFGDGYNGYGGGPGGGNFGGsPGYGGGR	0.9068	0	0	0.2955	0.4315	0.3778	0	0	0	0	0	0	0	0	0	0	0	0	0	0	0	0	0	540825	0	411257	0	0	0	0	0	0	0	0	0	0	0	0	0	0	0	0	0	540825	0
O88569_Y244	Hnrnpa2b1	sp|O88569|ROA2_MOUSE	O88569	GFGDGyNGYGGGPGGGNFGGSPGYGGGR	0.7861	0.25	0.7861	0.25	0.4165	0.3365	0	0	0	0	0	0	0	0	0	0	0	0	0	0.2829	0	294539	328974	540825	0	324327	0	0	0	0	0	0	0	0	0	0	0	254401	0	247683	209412	294539	328974	540825	0
O88643_S204	Pak1	sp|O88643|PAK1_MOUSE	O88643	sVIEPLPVTPTR	0.9228	0	0	0.3333	0	0.3333	0	0.4753	0.3333	0.3333	0	0	0	0	0	0	0	0.3333	0	0.3333	0	132883	0	129352	0	0	0	262118	304313	290074	0	0	0	0	0	0	0	281330	0	359298	0	132883	0	129352	0
O88643_T212	Pak1	sp|O88643|PAK1_MOUSE	O88643	SVIEPLPVtPTR	0.8828	0	0	0	0	0.4883	0.4885	0	0.768	0	0.4885	0	0	0	0	0	0.489	0	0.4853	0.4888	0	0	123960	0	0	188833	255263	0	304313	0	340180	0	0	0	0	0	307815	0	409232	359298	263509	0	123960	0	0
P00536_S16	Mos	sp|P00536|MOS_MOUSE	P00536	ELsPSVDSR	0.9246	0	0.3333	0	0.3333	0	0	0	0	0	0	0	0	0	0	0	0	0	0	0	0	0	189573	114994	0	0	0	0	0	0	0	0	0	0	0	0	0	0	0	0	0	0	189573	114994	0
P07901_S231	Hsp90aa1	sp|P07901|HS90A_MOUSE	P07901	DKEVsDDEAEEK;ERDKEVsDDEAEEK;EVsDDEAEEK;EVsDDEAEEKEEK;EVsDDEAEEKEEKEEEK	1	1	1	1	1	1	1	1	1	1	1	1	1	1	1	1	1	1	1	1	1	78158584	63555860	18436300	61775140	40990240	15481886	5.46685e+06	37493148	25116672	7355006	7.07355e+06	6215627	9460702	9093155	13131354	18764320	12534418	18317452	65993368	23133092	14724658	12742031	20564892	31929836
P07901_S252	Hsp90aa1	sp|P07901|HS90A_MOUSE	P07901	EEKEsDDKPEIEDVGsDEEEEEK;EsDDKPEIEDVGSDEEEEEK;EsDDKPEIEDVGSDEEEEEKK	1	0.84	1	0.8893	0.9298	0.9153	0.8966	0.9277	0.9255	0.9062	0.8814	0.7593	0.9094	0.7549	0.6452	0.8996	0.9217	0.8911	0.9206	0.9172	0.9332	57997028	177970112	102765344	94188184	117246576	45195248	62669772	27349594	16886406	33480076	40055228	50993236	60042964	28071820	34496372	84033904	92708008	55931776	65599420	74347520	37053824	57942364	50233584	41127392
P07901_S263	Hsp90aa1	sp|P07901|HS90A_MOUSE	P07901	EEKEsDDKPEIEDVGsDEEEEEK;ESDDKPEIEDVGsDEEEEEK;ESDDKPEIEDVGsDEEEEEKK;PEIEDVGsDEEEEEKK	1	0.9432	1	0.9412	0.942	0.9424	0.9412	0.9422	0.9422	0.9412	0.9401	0.9415	0.9407	0.9362	0.9389	0.9402	0.9364	0.9413	0.9385	0.9424	0.9412	112746784	180653072	144331712	132575024	122539840	78508936	68576112	59535744	61289684	66281000	44176232	50993236	60151592	70907280	58778464	84033904	118225576	55931776	99999960	107175936	64928596	103436976	76770336	72318840
P07901_T705	Hsp90aa1	sp|P07901|HS90A_MOUSE	P07901	LGLGIDEDDPtVDDTSAAVTEEMPPLEGDDDTSRMEEVD	0.8176	0.2435	0	0	0	0.8176	0	0	0	0	0	0	0	0	0	0	0	0.2414	0	0	0	2.12902e+06	830412	1.38065e+06	844640	2.55204e+06	0	0	0	0	0	0	0	0	0	0	0	4561201	0	0	0	2.12902e+06	830412	1.38065e+06	844640
P08003_Y313	Pdia4	sp|P08003|PDIA4_MOUSE	P08003	DGDDVVIIGLFQGDGDPAyLQyQDAANNLR	1	0	0	0	0	0	0	0	0	0	0	0	0	0	1	0	0	0	0	0	0	0	0	0	0	0	296223	352073	498814	489946	0	0	0	0	654862	0	0	0	0	0	0	0	0	0	0
P08003_Y316	Pdia4	sp|P08003|PDIA4_MOUSE	P08003	DGDDVVIIGLFQGDGDPAyLQyQDAANNLR	1	0	0	0	0	0	0	0	0	0	0	0	0	0	1	0	0	0	0	0	0	0	0	0	0	0	296223	352073	498814	489946	0	0	0	0	654862	0	0	0	0	0	0	0	0	0	0
P09405_S145	Ncl	sp|P09405|NUCL_MOUSE	P09405	KEDsDEDEDEEDEDDsDEDEDDEEEDEFEPPIVK	1	1	1	1	1	1	0	1	0	0	0	0	0	0	0	0	0	0	1	0	1	1.42147e+06	902956	935215	752323	432782	0	160856	0	0	0	0	0	0	0	0	0	0	0	0	0	1.42147e+06	902956	935215	752323
P09405_S157	Ncl	sp|P09405|NUCL_MOUSE	P09405	KEDSDEDEDEEDEDDsDEDEDDEEEDEFEPPIVK;KEDsDEDEDEEDEDDsDEDEDDEEEDEFEPPIVK	1	1	1	1	1	1	0	1	0	0	0	0	0	0	0	0	0	0	1	0	1	1.42147e+06	902956	935215	752323	432782	0	160856	0	0	0	0	0	0	0	0	0	0	0	0	0	1.42147e+06	902956	935215	752323
P09405_S28	Ncl	sp|P09405|NUCL_MOUSE	P09405	EVEEDsEDEEMSEDEDDssGEEEVVIPQK;EVEEDsEDEEMsEDEDDSSGEEEVVIPQK	0.9116	0.75	0.7524	0.75	0	0.7578	0	0	0	0	0	0	0	0	0	0	0	0	0	0	0	397795	2266517	313107	199403	178254	0	0	0	0	0	0	0	0	0	0	0	0	0	0	0	397795	1.78519e+06	313107	199403
P09405_S34	Ncl	sp|P09405|NUCL_MOUSE	P09405	EVEEDSEDEEMsEDEDDssGEEEVVIPQK;EVEEDsEDEEMsEDEDDSSGEEEVVIPQK	0.8354	0.75	0.7566	0.75	0	0.7578	0	0	0	0	0	0	0	0	0	0	0	0	0	0	0	397795	2266517	313107	199403	178254	0	0	0	0	0	0	0	0	0	0	0	0	0	0	0	397795	1.78519e+06	313107	199403
P09405_S403	Ncl	sp|P09405|NUCL_MOUSE	P09405	NLsFNITEDELK	0.9289	0	0	0.8886	0.5	0.9127	0	0	0	0	0	0	0	0	0	0	0	0	0	0.8539	0	207937	0	209921	286178	321554	0	0	0	133488	0	0	0	0	0	0	0	182403	239965	135922	174482	207937	0	209921	286178
P09405_T121	Ncl	sp|P09405|NUCL_MOUSE	P09405	ALVPtPGKK	1	1	1	1	1	1	1	1	1	1	1	0	0	0	0	0	1	1	1	1	1	104811	209859	186799	249505	386336	242699	361894	398765	249505	351270	0	0	0	0	0	375213	335890	432220	281848	390219	104811	209859	186799	249505
P09405_T76	Ncl	sp|P09405|NUCL_MOUSE	P09405	AAVPtPAK;AAVPtPAKK	1	0	1	0	0	1	0	0	0	0	0	0	0	0	0	0	0	0	0	0	0	157141	397716	0	35904.3	0	0	0	0	0	0	0	0	0	0	0	0	0	0	0	0	146642	227731	0	58262
P10711_S81	Tcea1	sp|P10711|TCEA1_MOUSE	P10711	LLDGPsTDKDPEEK	0.8919	0.5	0.5	0.5	0.5	0.5	0	0	0	0.5	0	0	0	0	0	0	0	0	0	0	0	316831	485125	285013	449535	0	0	0	0	0	0	0	0	0	0	0	0	0	0	0	0	316831	485125	285013	449535
P11157_S20	Rrm2	sp|P11157|RIR2_MOUSE	P11157	TPLATIADQQQLQLsPLK	0.9252	0	0	0.784	0.5055	0.8348	0	0	0	0	0	0	0	0	0	0	0	0	0	0	0	0	0	308072	119628	328955	0	0	0	0	0	0	0	0	0	0	0	0	0	0	0	0	0	212815	136526
P11157_T33	Rrm2	sp|P11157|RIR2_MOUSE	P11157	ENtPPTLSSTR	0.8979	0.8979	0	0.7108	0	0.2	0.2	0	0	0	0	0	0	0	0	0	0	0	0.2	0.2	0	367835	359697	210188	139481	437773	0	0	0	0	0	0	0	0	0	0	0	0	229158	0	0	367835	359697	210188	139481
P11499_S226	Hsp90ab1	sp|P11499|HS90B_MOUSE	P11499	EIsDDEAEEEK	1	1	1	1	1	1	1	1	1	1	1	1	1	1	1	1	1	1	1	1	0	6528185	8575983	6714854	3.92316e+06	5.94699e+06	1.27752e+06	2.28278e+06	3.01657e+06	2944694	1.52876e+06	2.96651e+06	3.35367e+06	0	2.08074e+06	2.91708e+06	1.68058e+06	2.13481e+06	1.68984e+06	2.53122e+06	0	6528185	8575983	6714854	3.92316e+06
P11499_S255	Hsp90ab1	sp|P11499|HS90B_MOUSE	P11499	IEDVGsDEEDDSGK;IEDVGsDEEDDSGKDK;PKIEDVGsDEEDDSGK	0.9453	0.892	0.9322	0.9311	0.9261	0.938	0.698	0.8962	0.8323	0.9353	0.893	0.8592	0.9283	0.8732	0.9389	0.9313	0.5	0.935	0.9191	0.9233	0.7299	9105336	12776612	13063898	12376742	6949003	2.72385e+06	3.80753e+06	3.65786e+06	3.66786e+06	3328730	4.31911e+06	5905093	4.25738e+06	3.42281e+06	4.29478e+06	4.2003e+06	4493666	3.69986e+06	4516305	1.27492e+06	6.25546e+06	8998563	8754514	8378227
P11499_S261	Hsp90ab1	sp|P11499|HS90B_MOUSE	P11499	IEDVGSDEEDDsGK;PKIEDVGSDEEDDsGK	0.9406	0	0.9103	0.8836	0.847	0.9207	0.9076	0	0.7257	0.8048	0.9254	0.9181	0.6177	0.9204	0.8288	0.6799	0.8488	0.9178	0.9214	0.9378	0	0	12776612	10891030	11297976	6442353	2.92817e+06	0	3.48493e+06	3.978e+06	3328730	2.42269e+06	5560896	3.65821e+06	2.58317e+06	3.01425e+06	4.2003e+06	4869096	3.69986e+06	3.27146e+06	0	0	8611474	10049184	7939762
P11881_Y2113	Itpr1	sp|P11881|ITPR1_MOUSE	P11881	ILyNMRPK	1	0	0	0	0	0	0	0	0	0	0	0	0	0	0	0	0	1	0	0	0	0	0	0	0	0	0	0	0	0	0	0	0	0	0	0	199101	182613	0	0	204405	0	0	0	0
P13864_S1128	Dnmt1	sp|P13864|DNMT1_MOUSE	P13864	HQVsEPKEPEAAIK	1	0	0	0	0	1	0	0	0	0	0	0	0	0	0	0	0	1	0	0	0	135879	0	104529	41661.6	392277	135173	101609	312608	200549	212716	0	0	0	0	0	50784.2	218368	0	193428	234510	135879	0	104529	41661.6
P13864_S138	Dnmt1	sp|P13864|DNMT1_MOUSE	P13864	sKSDSDTLSVETSPSSVATR;sKsDSDTLSVETSPSSVATR	0.833	0.3681	0.2791	0.2796	0.4842	0.2201	0.2764	0.2825	0.2481	0.2444	0.3526	0.242	0.2774	0.3147	0.2	0.214	0.2575	0.3179	0.2823	0.2827	0.2823	3.68842e+06	7136772	4.71925e+06	2.99697e+06	2933525	2.29872e+06	2.16871e+06	2349816	2.9806e+06	2.75142e+06	2.26878e+06	3.20011e+06	2.41854e+06	1.29267e+06	1.58333e+06	3.74139e+06	4.13946e+06	4.47541e+06	3648379	2.96037e+06	4.33851e+06	2.95361e+06	5551014	999497
P13864_S140	Dnmt1	sp|P13864|DNMT1_MOUSE	P13864	sDSDTLSVETsPSSVATR;sDSDTLsVETSPSSVATR;sDsDTLSVETSPSSVATR;sKsDSDTLSVETSPSSVATR	0.8994	0.8554	0.3841	0.4437	0.4842	0.8321	0.2764	0.3019	0.8738	0.3293	0.3651	0	0.2774	0	0.2	0.2	0.3525	0.3179	0.618	0.8415	0.2823	13406582	12644938	8100162	6.49332e+06	10241973	3.87782e+06	4340012	3.86805e+06	4.4006e+06	5.30995e+06	0	487741	488649	254161	226341	7097125	6234544	7827126	7.63232e+06	4329686	4636095	7149316	4.61182e+06	2991361
P13864_S142	Dnmt1	sp|P13864|DNMT1_MOUSE	P13864	SDsDTLSVETSPSsVATR;sDsDTLSVETSPSSVATR	0.8738	0.8554	0.3841	0.4437	0.3209	0.8321	0.2489	0.3019	0.8738	0.3293	0.2829	0	0	0	0	0	0.2504	0.2341	0.618	0.3291	0.249	4.46886e+06	5655562	3.38092e+06	2494651	3.69777e+06	1.5791e+06	2.1713e+06	1.51823e+06	1.59849e+06	1.76386e+06	0	0	0	0	0	1.75183e+06	2.09508e+06	3.35171e+06	2040328	1.36932e+06	4.46886e+06	5655562	3.38092e+06	2494651
P13864_S1421	Dnmt1	sp|P13864|DNMT1_MOUSE	P13864	DMsPLVAAR	1	0	0	0	0	1	0	0	0	0	0	0	0	0	0	0	0	0	0	0	0	0	57846.4	0	0	92372.7	0	0	0	0	0	0	0	0	0	0	0	0	0	0	0	0	57846.4	0	0
P13864_S146	Dnmt1	sp|P13864|DNMT1_MOUSE	P13864	SDSDTLsVETSPSSVATR;SKSDSDTLsVETSPSSVATR;SKSDSDTLsVEtSPSSVATR;sDSDTLsVETSPSSVATR	0.9255	0.8994	0.1632	0.2293	0.9255	0.8455	0.1582	0	0.4687	0	0	0.9243	0	0.1191	0.7801	0.1652	0.4256	0.1654	0.2999	0.8218	0.6748	7.3809e+06	2.71003e+06	3.31463e+06	6338320	7540251	490383	0	3.99647e+06	0	0	4.14525e+06	0	3.35226e+06	3.46256e+06	3295215	3572427	4.33779e+06	4.37708e+06	2040328	3.11172e+06	3.36339e+06	2.81035e+06	3.43733e+06	2.35659e+06
P13864_S150	Dnmt1	sp|P13864|DNMT1_MOUSE	P13864	SDSDTLSVETsPSSVATR;SDSDTLSVEtsPSSVATR;SKSDSDTLSVEtsPSSVATR;sDSDTLSVETsPSSVATR	0.9183	0.4656	0.2343	0.3871	0.348	0.3178	0.3193	0	0.2353	0	0.4542	0	0.2382	0.8193	0	0	0.165	0.2995	0	0.4403	0.8485	4853660	2.85101e+06	4.71925e+06	3739795	3842486	5069354	0	3829184	0	3546086	1.65015e+06	891891	830148	262742	571700	1.8206e+06	2.09508e+06	0	2040328	6.07208e+06	781424	1.64125e+06	11465087	2383476
P13864_S152	Dnmt1	sp|P13864|DNMT1_MOUSE	P13864	SDSDTLSVETSPsSVATR	0.9139	0.3179	0.3199	0	0.302	0	0	0.2974	0	0.3236	0.3208	0.3162	0.2616	0.2941	0.3184	0.9031	0.4297	0	0.9139	0	0	2912037	2.98326e+06	0	1.77964e+06	0	0	2823665	0	2897969	2953597	4.14525e+06	3.34053e+06	3.35226e+06	2.78511e+06	3.1921e+06	1.8206e+06	0	4.37708e+06	0	0	2912037	2.98326e+06	0	1.77964e+06
P13864_S182	Dnmt1	sp|P13864|DNMT1_MOUSE	P13864	EEsEEGNSAESAAEER;EEsEEGNSAESAAEERDQDK	0.8943	0.428	0.5234	0.3333	0.6516	0.3951	0.4771	0.5798	0.4902	0.4691	0.3333	0.4667	0.3333	0.6188	0.488	0.3333	0.4393	0.3333	0.4892	0.8352	0.3333	1.40464e+06	1.19126e+06	825566	1.27092e+06	1.26775e+06	789694	372299	808474	1.19198e+06	307586	537899	979450	587824	0	470339	777630	721831	856227	1148433	0	942533	887361	868142	866514
P13864_S187	Dnmt1	sp|P13864|DNMT1_MOUSE	P13864	EESEEGNsAESAAEER;EESEEGNsAEsAAEER;EESEEGNsAEsAAEERDQDK	0.9372	0.932	0.4811	0.9366	0.8089	0.4903	0.4799	0	0	0.4034	0.484	0	0	0	0	0.7649	0.3935	0.3665	0.4859	0.4805	0	867303	868889	825566	942196	887145	538511	0	0	924979	501352	0	0	0	0	0	777630	721831	97614.1	0	0	864212	865792	822623	676067
P13864_S190	Dnmt1	sp|P13864|DNMT1_MOUSE	P13864	EESEEGNSAEsAAEER;EESEEGNSAEsAAEERDQDK;EESEEGNsAEsAAEER;EESEEGNsAEsAAEERDQDK	0.9331	0.7329	0	0	0	0	0	0.8546	0	0	0	0	0.5459	0	0.904	0.7628	0	0	0	0.4537	0	0	0	0	0	0	0	0	0	0	0	0	0	0	0	0	0	721831	0	884387	0	0	0	0	0
P13864_S285	Dnmt1	sp|P13864|DNMT1_MOUSE	P13864	PRsQPRDPAAK;sQPRDPAAK	1	1	1	1	1	1	0	0	0	0	0	0	0	0	0	0	0	0	1	1	0	4.33071e+06	6947696	15262042	2.69182e+06	13970221	61827.4	121240	166331	107869	127269	0	0	0	0	0	204800	202843	245294	183707	28061	4180117	5.64447e+06	13479667	2502549
P13864_S331	Dnmt1	sp|P13864|DNMT1_MOUSE	P13864	KLEsHTVPVQSR	0.9132	0.8301	0.3333	0.4896	0.4907	0.9132	0	0.3333	0	0.3333	0.3333	0	0	0	0	0	0.4831	0.4901	0	0.4718	0.4827	838134	941570	1.2214e+06	1273962	1204084	147320	221940	196455	300007	239618	0	0	0	0	0	347688	547763	386770	756488	542010	838134	941570	1.2214e+06	1273962
P13864_S338	Dnmt1	sp|P13864|DNMT1_MOUSE	P13864	KLESHTVPVQsR	0.8464	0	0	0	0.8464	0	0	0	0	0	0	0	0	0	0	0	0	0	0	0	0	0	0	0	1273962	0	0	0	0	0	0	0	0	0	0	0	0	0	0	0	0	0	0	0	0
P13864_S713	Dnmt1	sp|P13864|DNMT1_MOUSE	P13864	EADDDEEADDDVsEMPSPK;EADDDEEADDDVsEMPSPKK	0.8803	0.6345	0.5	0.5	0.8145	0.8462	0.5	0.5	0.5	0.5	0.5	0.5	0.5	0.5	0	0	0.5	0.5	0.5	0.5	0.5	4.46486e+06	6019371	6359429	4728697	7162269	0	776682	982413	0	836691	0	559691	0	400868	0	1.10938e+06	234125	1.16743e+06	1.09526e+06	0	2.19759e+06	2.06333e+06	3.04225e+06	1.72407e+06
P13864_S717	Dnmt1	sp|P13864|DNMT1_MOUSE	P13864	EADDDEEADDDVSEMPsPK;EADDDEEADDDVSEMPsPKK	0.9403	0.9281	0.9285	0.9376	0	0.9077	0.9042	0	0	0	0.9266	0	0.8664	0	0.5136	0.8168	0.5112	0.7423	0.6166	0	0.6688	4464856	5757201	5170305	0	4.67637e+06	620180	0	0	587797	486398	415562	559691	0	400868	0	752064	867960	883434	0	857498	1.93815e+06	1.88871e+06	2.18647e+06	0
P13864_T144	Dnmt1	sp|P13864|DNMT1_MOUSE	P13864	SDSDtLSVETSPSSVATR;SKSDSDtLSVETSPSSVATR	0.9208	0	0.1647	0	0	0.4704	0.9208	0.4011	0.1417	0	0.8862	0	0	0.2032	0	0	0	0	0	0	0	0	2.98326e+06	0	0	3842486	3549027	2823665	0	0	2.40096e+06	0	0	1.17762e+06	0	0	0	0	0	0	0	0	3014451	0	0
P13864_T149	Dnmt1	sp|P13864|DNMT1_MOUSE	P13864	SDSDTLSVEtSPSSVATR;SDSDTLSVEtsPSSVATR;SKSDSDTLSVEtsPSSVATR;SKSDSDTLsVEtSPSSVATR	0.9324	0.9255	0.1977	0.5732	0.8369	0.1966	0.2324	0.3129	0.3004	0.7301	0.8686	0.245	0.8845	0.3244	0.918	0.8022	0	0.9323	0.1955	0.8994	0.8485	3.29684e+06	2.85101e+06	8033880	7260166	431690	5069354	2823665	3829184	2897969	5526973	4.14525e+06	3.34053e+06	3.35226e+06	2.78511e+06	3295215	0	6432876	4.37708e+06	3.05364e+06	2.96037e+06	2.1456e+06	2.11621e+06	4127696	2.70535e+06
P13864_T156	Dnmt1	sp|P13864|DNMT1_MOUSE	P13864	SDSDTLSVETSPSSVAtR;SDSDTLSVETSPSsVAtR	0.9125	0	0	0	0	0	0	0	0	0	0	0	0	0	0	0	0.6212	0	0	0	0	0	0	0	0	0	0	0	0	0	0	0	0	0	0	0	1.8206e+06	0	0	0	0	0	0	0	0
P13864_T308	Dnmt1	sp|P13864|DNMT1_MOUSE	P13864	EAEPEQVAPEtPEDR;EAEPEQVAPEtPEDRDEDER;EAEPEQVAPEtPEDRDEDEREEK	1	1	1	1	1	1	1	0	0	1	1	0	0	0	0	0	1	1	1	1	1	15548625	14080465	25783076	21701888	20723162	914766	1571171	1.3676e+06	952972	916911	1.01574e+06	268532	0	377294	427509	3898936	4.06324e+06	1.85718e+06	3.44947e+06	2908856	10076038	6671482	10328294	8816913
P13864_T333	Dnmt1	sp|P13864|DNMT1_MOUSE	P13864	KLESHtVPVQSR	0.8869	0	0	0.484	0	0	0	0	0	0	0	0	0	0	0	0	0	0	0	0	0	0	853364	874351	0	0	0	0	0	0	0	0	0	0	0	0	0	0	0	0	0	0	853364	874351	0
P14733_S392	Lmnb1	sp|P14733|LMNB1_MOUSE	P14733	LKLsPsPSSR	0.9324	0.5	0.5	0	0.5	0.5265	0	0	0	0	0	0	0	0	0	0	0	0	0	0.5	0	133852	271334	312010	267364	319595	162201	0	0	141163	0	0	0	0	0	0	196556	278915	0	288247	209181	133852	271334	312010	267364
P14733_S394	Lmnb1	sp|P14733|LMNB1_MOUSE	P14733	LKLsPsPSSR	0.9324	0.5	0.5	0	0.5	0.4912	0	0	0	0	0	0	0	0	0	0	0	0	0	0.5	0	133852	271334	312010	267364	319595	162201	0	0	141163	0	0	0	0	0	0	196556	278915	0	288247	209181	133852	271334	312010	267364
P14733_S396	Lmnb1	sp|P14733|LMNB1_MOUSE	P14733	LKLSPSPssR	0.8243	0	0	0	0	0	0	0	0	0	0	0	0	0	0	0	0	0	0	0	0	0	280701	0	0	0	0	0	0	0	0	0	0	0	0	0	0	0	309019	0	0	0	280701	0	0
P14733_S397	Lmnb1	sp|P14733|LMNB1_MOUSE	P14733	LKLSPSPssR	0.8243	0	0	0	0	0	0	0	0	0	0	0	0	0	0	0	0	0	0	0	0	0	280701	0	0	0	0	0	0	0	0	0	0	0	0	0	0	0	309019	0	0	0	280701	0	0
P14869_S304	Rplp0	sp|P14869|RLA0_MOUSE	P14869	AEAKEEsEEsDEDMGFGLFD;EEsEEsDEDMGFGLFD	1	0	0	0	1	1	0	0	0	0	0	0	0	0	0	0	0	0	0	0	0	0	67618.8	0	0	0	0	0	0	0	0	0	0	0	0	0	0	0	0	0	0	0	91909.9	0	0
P14869_S307	Rplp0	sp|P14869|RLA0_MOUSE	P14869	AEAKEEsEEsDEDMGFGLFD;EEsEEsDEDMGFGLFD	1	0	0	0	1	1	0	0	0	0	0	0	0	0	0	0	0	0	0	0	0	0	67618.8	0	0	0	0	0	0	0	0	0	0	0	0	0	0	0	0	0	0	0	91909.9	0	0
P14873_S1438	Map1b	sp|P14873|MAP1B_MOUSE	P14873	QGFPDREsPVSDLTSTGLYQDK	0.7848	0.4433	0	0.4189	0	0	0	0	0	0	0	0	0	0	0	0	0	0	0	0	0	148749	0	298245	265080	289399	0	0	0	0	0	0	0	0	0	0	0	0	0	0	0	148749	0	298245	265080
P14873_S1497	Map1b	sp|P14873|MAP1B_MOUSE	P14873	LGGDVsPTQIDVSQFGSFK	0.915	0	0	0.25	0	0.4626	0	0	0	0	0	0	0	0	0	0	0	0.25	0	0	0.4764	0	0	300388	0	245615	0	0	0	0	0	0	0	0	0	0	0	235377	0	0	0	0	0	300388	0
P14873_T3	Map1b	sp|P14873|MAP1B_MOUSE	P14873	AtVVVEATEPEPSGSIGNPAASTSPSLSHR	0.8283	0	0	0.1111	0	0.1216	0	0	0	0	0	0	0	0	0	0	0	0.1241	0	0	0.1111	0	0	310996	0	182077	0	0	0	0	0	0	0	0	0	0	0	0	0	362763	327900	0	0	310996	0
P14873_T527	Map1b	sp|P14873|MAP1B_MOUSE	P14873	DLTGQVPtPPVK	0.9187	0	0	0	0	0.9082	0	0	0	0	0	0	0	0	0	0	0	0	0	0	0	81084.9	91851.9	106322	0	116747	0	0	0	0	0	0	0	0	0	0	0	0	0	0	0	81084.9	91851.9	106322	0
P15920_S695	Atp6v0a2	sp|P15920|VPP2_MOUSE	P15920	KDsEEEVSLLGNQDIEEGNSR	0.8976	0.3333	0	0.3797	0.3396	0.8976	0	0	0	0	0	0	0	0	0	0	0	0	0	0.3333	0.3333	82054.5	143065	237137	67744.8	154477	0	0	0	0	0	0	212895	0	0	0	0	141317	0	0	84349	82054.5	143065	237137	67744.8
P16125_S11	Ldhb	sp|P16125|LDHB_MOUSE	P16125	LIAsVADDEAAVPNNK	1	1	1	1	1	1	1	1	0	0	0	1	1	1	1	1	1	1	1	0	1	1.54128e+06	1.33795e+06	2.11422e+06	1.24718e+06	1.62102e+06	1.65417e+06	1.51553e+06	1324962	1.29254e+06	0	0	2.05416e+06	1.02372e+06	1.4624e+06	768981	1.53498e+06	1887177	3.52383e+06	1.74424e+06	1699746	1.54128e+06	1.33795e+06	2.11422e+06	1.24718e+06
P17095_S36	Hmga1	sp|P17095|HMGA1_MOUSE	P17095	KQPPVsPGTALVGSQK	0.9093	0	0	0	0.3333	0.3333	0	0	0	0.3333	0	0	0	0	0	0	0	0.3333	0	0	0	206881	0	164850	183035	299372	159361	0	0	228089	0	0	0	0	0	0	249195	182511	209152	338384	269821	206881	0	164850	183035
P17095_S49	Hmga1	sp|P17095|HMGA1_MOUSE	P17095	EPsEVPTPK	0.8417	0.5	0.5	0	0.5	0.5	0.5	0.5	0.5	0.5	0.5	0	0	0	0	0	0.5	0.5	0.5	0.5	0	54875.4	135360	160862	214385	291068	463765	187913	528873	260174	448028	110052	0	0	0	0	417311	412634	509768	416785	0	54875.4	135360	160862	214385
P17095_T53	Hmga1	sp|P17095|HMGA1_MOUSE	P17095	EPSEVPtPK	0.9356	0.9262	0.9228	0	0	0	0	0.9282	0	0.9356	0.7202	0	0	0	0	0	0	0	0	0	0	227971	283220	195995	0	0	0	553717	0	449432	448028	0	0	0	0	0	0	0	0	0	196858	227971	283220	195995	0
P18654_S715	Rps6ka3	sp|P18654|KS6A3_MOUSE	P18654	NQsPVLEPVGR	1	1	1	1	1	1	1	1	1	1	1	0	0	0	0	0	1	1	1	1	1	251540	686760	467107	358660	373812	210123	299258	375791	304213	234721	0	118793	298740	25126.8	194262	421903	687827	561467	487987	477256	251540	686760	467107	358660
P18760_S3	Cfl1	sp|P18760|COF1_MOUSE	P18760	AsGVAVSDGVIK	0.9445	0.9383	0.9421	0.9425	0.9413	0.943	0.9404	0.9393	0.9419	0.9421	0.9395	0.9408	0.9419	0.9366	0.9394	0.9395	0.9388	0.9406	0.9406	0.9424	0.9412	7359985	8859435	15234985	9410470	10060835	4.51056e+06	3.25441e+06	5346551	3.68818e+06	3.98596e+06	3810587	9404611	9668586	5.54156e+06	5773262	3464461	4629065	4035187	2534101	3.8478e+06	7359985	8859435	15234985	9410470
P18760_S8	Cfl1	sp|P18760|COF1_MOUSE	P18760	ASGVAVsDGVIK	0.9353	0.7688	0.9023	0	0.5918	0	0	0	0	0.7672	0	0.9136	0.5565	0	0.5941	0.8538	0	0	0	0.8658	0	122878	8859435	0	0	0	0	73239.3	310365	3.68818e+06	0	3810587	9404611	0	613008	5773262	0	258122	0	0	0	122878	8859435	0	0
P19437_S219	Ms4a1	sp|P19437|CD20_MOUSE	P19437	sNVVLLSAGEK	0.9333	0	0	0	0	0	0	0	0	0.5	0	0	0	0	0	0	0	0	0	0	0	0	0	0	0	0	83057.9	0	0	90217.8	0	0	0	0	51156.2	0	0	117171	0	86438.2	73670.2	0	0	0	0
P23242_S341	Gja1	sp|P23242|CXA1_MOUSE	P23242	MGQAGSTISNSHAQPFDFPDDsQNAK	0.8589	0	0	0	0	0	0	0	0	0	0	0	0	0	0.8589	0	0	0	0	0	0	0	0	0	0	0	94620.5	0	0	0	37177.1	0	310675	197825	149024	0	0	0	0	0	0	0	0	0	0
P25206_S668	Mcm3	sp|P25206|MCM3_MOUSE	P25206	AsEDESDLEDEEEK;KAsEDEsDLEDEEEK	1	1	1	0	0	0	0	0	0	0	0	0	0	0	0	0	0	0	0	0	0	0	162447	0	0	0	0	0	0	0	0	0	0	0	0	0	0	0	0	0	0	0	0	0	0
P25206_S672	Mcm3	sp|P25206|MCM3_MOUSE	P25206	KAsEDEsDLEDEEEK	1	1	1	0	0	0	0	0	0	0	0	0	0	0	0	0	0	0	0	0	0	0	162447	0	0	0	0	0	0	0	0	0	0	0	0	0	0	0	0	0	0	0	0	0	0
P26043_S532	Rdx	sp|P26043|RADI_MOUSE	P26043	QLQALsSELAQAR	0.9275	0.5	0	0	0.9275	0.5	0.5	0.5	0.5	0.5	0.5	0	0	0	0	0	0.5	0.5	0.7839	0.5	0.5	131946	0	157724	0	196839	230109	270877	237139	216492	0	0	0	0	90704.9	0	237781	609680	473238	406278	643549	131946	0	157724	0
P27546_S254	Map4	sp|P27546|MAP4_MOUSE	P27546	ALETMAEQTTDVVHsPSTDTTPGPDTEAALAK	0.8259	0	0.3115	0	0	0.7674	0	0	0	0	0	0	0	0	0	0	0	0.1502	0	0	0	0	641674	1.01821e+06	1.3025e+06	3.13343e+06	0	0	0	0	0	0	0	0	0	0	775266	960541	0	0	805537	0	834626	1.09541e+06	1401261
P27546_S475	Map4	sp|P27546|MAP4_MOUSE	P27546	DMsPLPESEVTLGK	0.9415	0.938	0.8493	0.9401	0.9395	0.9404	0.6851	0.868	0.3333	0.8753	0.8815	0	0	0	0	0	0.5136	0.8587	0.5023	0.9336	0.9184	1.68616e+06	1.28215e+06	1.47874e+06	1107006	2.21595e+06	0	0	229807	0	0	0	0	0	0	0	772452	900077	945722	769892	727163	1.04365e+06	725405	776250	579933
P27546_S480	Map4	sp|P27546|MAP4_MOUSE	P27546	DMSPLPEsEVTLGK	0.9166	0	0.9166	0	0	0.471	0	0	0	0	0	0	0	0	0	0	0	0	0	0	0	0	708927	0	0	1.63187e+06	0	0	0	0	0	0	0	0	0	0	0	0	0	0	0	0	708927	0	0
P27546_S517	Map4	sp|P27546|MAP4_MOUSE	P27546	DMsPSAETEAPLAK	0.939	0.92	0.9319	0.9353	0.4901	0.9389	0	0.8573	0	0	0.3333	0	0	0	0	0	0.3333	0.4837	0.3333	0.3333	0.9134	1.3567e+06	2.61819e+06	2.3972e+06	0	2615553	0	0	0	0	0	0	0	0	0	0	0	441413	0	0	307540	863991	1.21939e+06	1.11287e+06	0
P27546_S519	Map4	sp|P27546|MAP4_MOUSE	P27546	DMSPsAETEAPLAK	0.8984	0.7077	0.8984	0	0	0.423	0	0	0	0	0	0	0	0	0	0	0	0	0	0	0	827734	562729	0	0	0	0	0	0	0	0	0	0	0	0	0	0	0	0	0	0	827734	562729	0	0
P27546_S617	Map4	sp|P27546|MAP4_MOUSE	P27546	AAEQMSTLPIDAPsPLENLEQK	0.9193	0.8544	0.8276	0.8799	0.8946	0.8875	0	0	0	0	0	0	0	0	0	0	0	0	0	0	0.3654	289395	0	1114867	765951	1.14044e+06	0	0	0	0	0	0	0	0	0	0	257457	435320	354362	351166	299316	365127	0	353179	328594
P27546_S667	Map4	sp|P27546|MAP4_MOUSE	P27546	AAVGVTGNDITTPPNKEPPPsPEKK;AAVGVTGNDITtPPNKEPPPsPEK;AAVGVtGNDITTPPNKEPPPsPEK;EPPPsPEKK	1	0.5233	0.8021	0	0	0	0	0	0	0	0	0	0	0	0	0	0	0	0	0	0	293389	242590	504374	257532	398422	0	0	0	0	0	0	0	0	0	0	0	0	0	0	0	293389	242590	504374	257532
P27546_S785	Map4	sp|P27546|MAP4_MOUSE	P27546	ATsPSTLVSTGPSSR	0.9169	0	0	0	0.1424	0	0	0	0	0	0	0	0	0	0	0	0	0	0	0	0	0	0	0	662427	0	0	0	0	0	0	0	0	0	0	0	0	0	0	0	0	0	0	0	662427
P27546_S787	Map4	sp|P27546|MAP4_MOUSE	P27546	ATSPsTLVSTGPSSR	0.7756	0.1549	0	0	0	0	0	0	0	0	0	0	0	0	0	0	0	0	0	0	0	866217	0	0	0	0	0	0	0	0	0	0	0	0	0	0	0	0	0	0	0	866217	0	0	0
P27546_S791	Map4	sp|P27546|MAP4_MOUSE	P27546	ATSPSTLVsTGPSSR	0.8021	0	0	0	0	0.2345	0.2041	0	0	0	0	0	0	0	0	0	0	0	0	0	0	0	0	0	0	911517	555617	0	0	0	0	0	0	0	0	0	0	0	0	0	0	0	0	0	0
P27546_T243	Map4	sp|P27546|MAP4_MOUSE	P27546	ALEtMAEQTTDVVHSPSTDTTPGPDTEAALAK	0.8846	0.3612	0.2381	0.1247	0.2821	0.1247	0	0	0	0	0	0	0	0	0	0	0.1223	0.1111	0	0.1111	0.1111	1.78375e+06	809300	2.84578e+06	2.57134e+06	816375	0	245121	0	0	226858	0	0	0	0	0	595644	641473	369249	432233	409566	780394	448391	1.04186e+06	880946
P27546_T483	Map4	sp|P27546|MAP4_MOUSE	P27546	DMSPLPESEVtLGK	0.8774	0	0	0	0	0.8774	0	0	0.5049	0	0	0	0	0	0	0	0	0	0	0	0	0	0	0	0	1.63187e+06	0	0	202739	0	0	0	0	0	0	0	0	0	0	0	0	0	0	0	0
P27546_T652	Map4	sp|P27546|MAP4_MOUSE	P27546	AAVGVtGNDITTPPNK;AAVGVtGNDITTPPNKEPPPsPEK	0.868	0.635	0.803	0.3333	0.3333	0.3333	0	0	0	0	0	0	0	0	0	0	0	0.3333	0	0.3333	0.3333	1.07609e+06	958479	1.03841e+06	561759	1.45057e+06	0	0	0	0	0	0	0	0	0	0	0	266409	0	326536	204278	738698	662784	601004	335314
P27546_T658	Map4	sp|P27546|MAP4_MOUSE	P27546	AAVGVTGNDITtPPNK;AAVGVTGNDITtPPNKEPPPsPEK	0.7949	0	0	0	0	0.7806	0	0	0	0	0	0	0	0	0	0	0	0	0	0	0	0	0	0	0	1.05215e+06	0	0	0	0	0	0	0	0	0	0	0	0	0	0	0	0	0	0	0
P27546_T784	Map4	sp|P27546|MAP4_MOUSE	P27546	AtSPSTLVSTGPSSR	0.8631	0.4754	0.4758	0.2906	0.3251	0.4737	0.1611	0.2341	0.125	0.1644	0.3849	0	0	0	0	0.125	0.165	0.3243	0.3122	0.4733	0.3062	866217	901456	654546	662427	1.10895e+06	555617	530928	508537	473259	424889	0	0	0	0	0	662133	778690	877448	936952	864786	866217	901456	654546	662427
P27546_T788	Map4	sp|P27546|MAP4_MOUSE	P27546	ATSPStLVSTGPSSR	0.8565	0	0	0	0.1521	0	0	0	0	0	0	0	0	0	0	0	0	0	0	0	0	0	0	0	662427	0	0	0	0	0	0	0	0	0	0	0	0	0	0	0	0	0	0	0	662427
P27546_T802	Map4	sp|P27546|MAP4_MOUSE	P27546	SPATtLPK	0.8607	0	0	0	0	0	0	0	0	0	0	0	0	0	0	0	0	0	0	0	0	158010	270571	158181	128767	163102	0	0	0	0	0	0	0	0	0	0	0	0	0	0	0	158010	270571	158181	128767
P27612_S466	Plaa	sp|P27612|PLAP_MOUSE	P27612	GQTLGLGNTsFSDPFTGGGR	0.783	0	0	0	0	0	0	0	0	0	0	0	0	0	0	0	0.783	0	0	0	0	0	0	0	0	0	0	0	0	0	0	0	0	0	0	0	818968	0	0	0	0	0	0	0	0
P27612_T459	Plaa	sp|P27612|PLAP_MOUSE	P27612	GQtLGLGNTSFSDPFTGGGR	0.8986	0.2	0.2	0.3259	0.6265	0.248	0	0	0	0	0.2	0	0	0	0	0	0	0.8265	0.2	0.2	0.2485	0	0	410831	0	397862	0	0	489235	476357	393362	0	0	0	0	0	0	721805	1.19745e+06	866829	781419	0	0	410831	0
P27612_T472	Plaa	sp|P27612|PLAP_MOUSE	P27612	GQTLGLGNTSFSDPFtGGGR	0.7555	0.5245	0	0	0	0	0.7555	0	0	0	0	0	0	0	0	0	0	0	0	0	0	0	0	0	0	0	458448	0	0	0	0	0	0	0	0	0	0	0	0	0	0	0	0	0	0
P28656_T62	Nap1l1	sp|P28656|NP1L1_MOUSE	P28656	LDGLVDtPTGYIESLPK	0.8771	0	0	0	0.25	0	0	0	0	0	0	0	0	0	0	0	0	0	0	0	0	0	0	0	0	0	0	0	0	0	0	0	0	0	0	0	0	0	0	249981	0	0	0	0	0
P28867_S652	Prkcd	sp|P28867|KPCD_MOUSE	P28867	NLIDsMDQEAFHGFSFVNPK	0.8197	0	0	0	0	0	0	0	0	0	0	0	0	0	0	0	0	0	0	0	0	0	0	0	0	204046	0	0	0	0	0	0	0	0	0	0	247977	302990	284319	353066	0	0	0	0	0
P35276_S10	Rab3d	sp|P35276|RAB3D_MOUSE	P35276	ASASEPPAsPR;ASASEPPAsPRDAADQNFDYMFK	0.9408	0.9408	0.9408	0.9337	0.9374	0.9389	0	0	0.929	0.9054	0.8889	0	0	0	0	0	0.8758	0.9369	0.9376	0.939	0	1.28226e+06	2.33931e+06	2471910	2.95977e+06	3.10783e+06	0	96965.5	725209	526151	617289	0	0	0	0	0	760222	837336	1.10216e+06	923725	0	1.14553e+06	1501644	1.46412e+06	1.38916e+06
P35276_S190	Rab3d	sp|P35276|RAB3D_MOUSE	P35276	MNEsLEPSSSPGSNGK	0.8101	0.2	0.3412	0.2	0.7925	0.8101	0	0	0	0	0	0	0	0	0	0	0	0	0	0.2	0	217605	739640	920657	1.37527e+06	0	0	0	0	0	0	0	0	0	0	0	0	0	0	0	0	227460	756821	484860	687781
P35276_S199	Rab3d	sp|P35276|RAB3D_MOUSE	P35276	MNESLEPSSSPGsNGK	0.8437	0	0	0	0.8437	0.8383	0	0	0	0	0	0	0	0	0	0	0	0	0	0	0	274329	0	0	778858	811957	0	0	0	0	0	0	0	0	0	0	0	0	0	0	0	274329	0	0	778858
P35276_S3	Rab3d	sp|P35276|RAB3D_MOUSE	P35276	AsASEPPASPR	0.8868	0.3333	0.7875	0.8482	0.8868	0.5649	0.3333	0.3333	0.3333	0.458	0.3333	0	0	0	0	0	0.5184	0.4853	0.4524	0.6871	0	1.04721e+06	1.4556e+06	1.43288e+06	1.43288e+06	1.5418e+06	113626	738397	725209	526151	617289	0	0	0	0	0	760222	837336	1.10216e+06	923725	0	1.04721e+06	1.4556e+06	1.43288e+06	1.43288e+06
P35276_S5	Rab3d	sp|P35276|RAB3D_MOUSE	P35276	ASAsEPPASPR	0.921	0.9064	0.7284	0.8082	0.921	0.6504	0	0.4701	0	0	0	0	0	0	0	0	0	0.4867	0	0	0	1.04721e+06	1.4556e+06	395875	1.43288e+06	1.5418e+06	0	738397	0	0	0	0	0	0	0	0	0	837336	0	0	0	1.04721e+06	1.4556e+06	197983	1.43288e+06
P35276_Y21	Rab3d	sp|P35276|RAB3D_MOUSE	P35276	ASASEPPASPRDAADQNFDyMFK	0.7604	0	0.4181	0	0.3796	0	0	0	0	0	0	0	0	0	0	0	0	0	0	0.2983	0	0	663481	0	706129	0	280677	0	382253	301020	390501	0	0	0	0	0	0	0	369425	833954	479832	0	663481	0	706129
P35564_S553	Canx	sp|P35564|CALX_MOUSE	P35564	QKsDAEEDGVTGSQDEEDSK;QKsDAEEDGVTGSQDEEDSKPK;QKsDAEEDGVTGSQDEEDsKPK;QKsDAEEDGVTGsQDEEDSKPK	0.9351	0.5276	0.6514	0.9007	0.9128	0.8806	0.6274	0	0.8326	0.4748	0.5892	0.8264	0.3096	0	0	0.25	0.9182	0.8605	0.8365	0	0	467681	423398	7.42544e+06	2.93531e+06	572902	0	0	694812	0	441594	0	0	1.65763e+06	0	0	0	0	901251	0	721050	456493	527806	784409	489494
P35564_S563	Canx	sp|P35564|CALX_MOUSE	P35564	QKsDAEEDGVTGsQDEEDSKPK	0.917	0	0	0.898	0	0	0	0	0	0	0	0	0	0	0	0	0.917	0	0	0	0	0	0	3.19867e+06	0	0	0	0	0	0	0	0	0	0	0	0	0	0	0	0	0	0	0	0	0
P35564_S569	Canx	sp|P35564|CALX_MOUSE	P35564	QKSDAEEDGVTGSQDEEDsKPK;QKsDAEEDGVTGSQDEEDsKPK;SDAEEDGVTGSQDEEDsKPK	0.8991	0	0	0.6161	0.8991	0.8739	0	0	0	0.829	0	0	0	0	0	0	0	0	0	0	0	0	0	3.51843e+06	2.36093e+06	583223	513904	0	0	250839	485847	593181	0	0	0	0	0	0	0	0	0	0	0	3.51843e+06	2.36093e+06
P35564_S582	Canx	sp|P35564|CALX_MOUSE	P35564	AEEDEILNRsPR	1	1	1	1	1	1	1	1	1	1	1	1	1	1	1	1	1	1	1	1	1	11750447	13348624	11316627	11169225	18108164	6121942	6500891	5921900	6204376	6487548	7329334	7663295	8176537	6548415	7178913	8316745	9539377	9583590	9663106	10157506	6467912	7446876	6528614	6470968
P35761_S277	Ttk	sp|P35761|TTK_MOUSE	P35761	VPVNLLNsPDFYVK	0.8767	0	0	0	0	0	0.619	0	0	0	0	0	0	0	0	0	0	0	0.5	0.766	0.663	0	0	0	0	0	168793	271955	138627	0	0	0	0	0	0	0	0	0	371659	685826	0	0	0	0	0
P39447_S1614	Tjp1	sp|P39447|ZO1_MOUSE	P39447	AVPVsPSAVEEDEDEDGHTVVATAR	0.9255	0	0	0	0	0.9083	0.4119	0.4224	0	0.4562	0.4778	0.4073	0.25	0.25	0.4596	0	0.4769	0.4021	0	0.4699	0.4692	157756	144288	283718	189137	291220	451686	417209	0	518004	459891	549098	402951	542382	323955	365431	542824	842249	0	422057	779580	157756	144288	283718	189137
P39447_T1628	Tjp1	sp|P39447|ZO1_MOUSE	P39447	AVPVSPSAVEEDEDEDGHtVVATAR	0.9073	0	0	0	0	0	0	0	0	0	0	0	0	0	0	0	0	0.3682	0	0	0	0	0	0	0	0	0	0	0	0	0	0	0	0	0	0	0	730072	0	0	0	0	0	0	0
P40336_S315	Vps26a	sp|P40336|VP26A_MOUSE	P40336	FEsPDSQASAEQPEM	0.7731	0.3333	0.7731	0.4341	0	0	0	0	0	0	0	0	0	0	0	0	0	0	0	0	0	290145	476285	232388	0	417857	0	0	0	0	0	0	0	0	0	0	0	0	0	0	0	290145	476285	232388	0
P40630_T17	Tfam	sp|P40630|TFAM_MOUSE	P40630	ALGRtGVEMCAGCGGR	1	0	0	0	0	0	0	0	0	0	0	0	0	0	0	0	0	1	0	0	0	0	0	0	0	0	0	0	0	0	0	0	0	0	0	0	514882	335471	625199	0	697976	0	0	0	0
P42208_S218	Septin2	sp|P42208|SEPT2_MOUSE	P42208	IYHLPDAEsDEDEDFK	0.9333	0	0	0.9333	0.8888	0.8476	0	0	0	0	0	0	0	0	0	0	0	0	0	0	0	0	138254	287051	263556	293377	0	0	0	0	0	0	0	0	0	0	0	0	0	0	0	0	138254	287051	263556
P42208_Y211	Septin2	sp|P42208|SEPT2_MOUSE	P42208	IyHLPDAESDEDEDFK	0.8255	0	0	0.5	0	0	0	0	0	0	0	0	0	0	0	0.5	0	0	0	0	0	210244	0	287051	0	0	0	0	419345	374733	0	629224	0	612985	0	350605	0	0	0	0	0	210244	0	287051	0
P42567_S816	Eps15	sp|P42567|EPS15_MOUSE	P42567	LNDPFQPFPGNDsPK	1	1	1	1	1	1	0	0	1	1	0	0	0	0	0	0	1	0	0	0	1	241081	0	215157	0	459924	0	0	148814	0	0	0	0	0	0	0	282893	0	0	351218	243550	241081	0	215157	0
P45591_S3	Cfl2	sp|P45591|COF2_MOUSE	P45591	AsGVTVNDEVIK	0.9448	0.9402	0.9435	0.9423	0.5	0.8169	0.7412	0.7306	0.9394	0.9385	0.9375	0.9408	0.9421	0.9345	0.9395	0.9403	0.7945	0.9403	0.5	0.8899	0.9068	3.84648e+06	3.84352e+06	3.90237e+06	3771084	4.23723e+06	3.07935e+06	2.78947e+06	3.49271e+06	3.02958e+06	1.95986e+06	4382042	10399099	8792173	3478444	4262482	1.52769e+06	2426259	2339074	1.69606e+06	1.18532e+06	2.98169e+06	3.09429e+06	3.90237e+06	3771084
P45591_T6	Cfl2	sp|P45591|COF2_MOUSE	P45591	ASGVtVNDEVIK	0.937	0.937	0.9038	0	0	0.9007	0.5131	0.8689	0	0.9228	0	0	0	0.9245	0.773	0.6987	0	0	0	0	0	3503480	3393496	0	0	3749313	267105	2.78947e+06	0	3.02958e+06	0	0	0	7626928	3478444	605463	0	0	0	0	0	3.2277e+06	3.12637e+06	0	0
P47955_S101	Rplp1	sp|P47955|RLA1_MOUSE	P47955	EEsEEsEDDMGFGLFD;KEEsEEsEDDMGFGLFD	1	1	1	1	1	1	1	0	0	0	0	0	0	0	0	0	0	0	0	0	0	1.12053e+06	1.0742e+06	867103	1.12676e+06	1.36202e+06	1057144	0	1.38813e+06	1.42665e+06	1.33748e+06	0	0	0	0	0	1.10352e+06	0	1.07535e+06	0	0	1.12124e+06	1.07488e+06	867650	1.12747e+06
P47955_S104	Rplp1	sp|P47955|RLA1_MOUSE	P47955	EEsEEsEDDMGFGLFD;KEEsEEsEDDMGFGLFD	1	1	1	1	1	1	1	0	0	0	0	0	0	0	0	0	0	0	0	0	0	1.12053e+06	1.0742e+06	867103	1.12676e+06	1.36202e+06	1057144	0	1.38813e+06	1.42665e+06	1.33748e+06	0	0	0	0	0	1.10352e+06	0	1.07535e+06	0	0	1.12124e+06	1.07488e+06	867650	1.12747e+06
P48678_S390	Lmna	sp|P48678|LMNA_MOUSE	P48678	LRLsPsPTSQR	0.846	0	0	0	0.5	0.6029	0	0	0	0	0	0	0	0	0	0	0	0	0	0	0	184990	470510	258199	235501	292114	0	0	0	0	0	0	0	0	0	0	0	0	0	0	0	184990	470510	258199	235501
P48678_S392	Lmna	sp|P48678|LMNA_MOUSE	P48678	LRLsPsPTSQR	0.846	0	0	0	0.5	0.6029	0	0	0	0	0	0	0	0	0	0	0	0	0	0	0	184990	470510	258199	235501	292114	0	0	0	0	0	0	0	0	0	0	0	0	0	0	0	184990	470510	258199	235501
P49025_S1458	Cit	sp|P49025|CTRO_MOUSE	P49025	MNsPGLQSK	0.7647	0	0.5	0.7647	0	0	0	0	0	0	0	0	0	0	0	0	0	0	0	0	0	0	178652	0	95238.4	0	0	0	0	0	0	0	0	0	0	0	0	0	0	0	0	0	178652	0	95238.4
P49312_S6	Hnrnpa1	sp|P49312|ROA1_MOUSE	P49312	SEsPKEPEQLR;SEsPKEPEQLRK	0.94	0	0	0	0.6995	0	0	0	0	0	0	0	0	0	0	0	0	0	0	0	0.7	0	0	0	1.02755e+06	0	0	0	0	0	0	0	0	0	0	0	0	0	0	0	1184927	0	0	0	1.02755e+06
P51125_S219	Cast	sp|P51125|ICAL_MOUSE	P51125	PFTPAsPVQSTPSK;PFTPAsPVQSTPSKPSDK	0.8743	0	0	0	0.1883	0	0.5566	0	0.3076	0	0.8683	0	0	0	0	0.4271	0	0	0	0	0	0	0	0	405011	0	240091	0	310411	0	357333	0	0	0	0	255875	0	0	0	0	0	0	0	0	405011
P51125_S223	Cast	sp|P51125|ICAL_MOUSE	P51125	PFTPASPVQsTPSKPSDK	0.7833	0	0	0	0.2252	0	0	0	0	0	0	0	0	0	0	0	0	0	0	0	0	0	0	0	405011	0	0	0	0	0	0	0	0	0	0	0	0	0	0	0	0	0	0	0	405011
P51125_S229	Cast	sp|P51125|ICAL_MOUSE	P51125	PFTPASPVQSTPSKPsDK	0.917	0	0	0	0	0	0	0.6381	0	0	0	0	0	0	0	0	0.8098	0	0	0	0.2007	0	0	0	0	0	0	281235	0	0	0	0	0	0	0	0	319247	0	0	0	385301	0	0	0	0
P51125_T216	Cast	sp|P51125|ICAL_MOUSE	P51125	PFtPASPVQSTPSK;PFtPASPVQSTPSKPSDK	0.8918	0.2	0.2	0.1667	0	0.2302	0.3171	0.8626	0.7546	0.2544	0.4126	0	0.314	0.1667	0.1667	0.1667	0	0.4175	0.1667	0.3992	0.2	463588	463949	291215	0	403664	240091	296773	310411	265074	322801	0	490275	662920	272915	255875	0	333443	299568	282507	385301	211408	199892	301296	0
P51125_T479	Cast	sp|P51125|ICAL_MOUSE	P51125	SNDTSQtPPGETVPR	0.8475	0.8475	0.4099	0.4737	0.7836	0.4017	0	0	0	0	0	0	0	0	0	0	0	0	0	0	0	526261	574462	0	380511	548100	0	0	0	0	0	0	0	0	0	0	0	0	0	0	0	526261	574462	0	380511
P51125_T484	Cast	sp|P51125|ICAL_MOUSE	P51125	SNDTSQTPPGEtVPR	0.8605	0.4723	0	0	0	0	0	0	0	0	0	0	0	0	0	0	0	0	0	0	0	526261	0	531636	0	0	0	0	0	0	0	0	0	0	0	0	0	0	0	0	0	526261	0	531636	0
P51859_S165	Hdgf	sp|P51859|HDGF_MOUSE	P51859	AGDVLEDsPK	1	0	0	1	0	1	0	1	1	0	0	0	0	0	0	0	0	0	0	0	0	104497	135404	92256.6	0	112302	0	0	0	0	0	0	0	0	0	0	0	0	0	0	0	104497	135404	92256.6	0
P52293_S54	Kpna2	sp|P52293|IMA1_MOUSE	P52293	NVsSFPDDATSPLQENR	0.8833	0.4302	0.25	0.4761	0.4663	0.4651	0.3575	0.3303	0.25	0.25	0.25	0	0	0	0	0	0.3281	0.401	0.25	0.4623	0.4717	3.20717e+06	3.16621e+06	3.66375e+06	4758084	4.63566e+06	1.36844e+06	800387	1.2959e+06	1482468	1.18295e+06	0	0	0	0	0	3.02651e+06	2732515	4379593	2.86594e+06	1.38499e+06	3.20717e+06	3.16621e+06	3.66375e+06	4758084
P52293_S55	Kpna2	sp|P52293|IMA1_MOUSE	P52293	NVSsFPDDATSPLQENR	0.8792	0	0	0.3283	0	0.5466	0	0	0	0	0	0	0	0	0	0	0	0	0	0	0	0	0	2.85105e+06	0	4.63566e+06	0	0	0	0	0	0	0	0	0	0	0	0	0	0	0	0	0	2.85105e+06	0
P52293_S62	Kpna2	sp|P52293|IMA1_MOUSE	P52293	NVSSFPDDATsPLQENR	0.9361	0.8069	0.8917	0.7926	0.9203	0.9361	0	0.6146	0	0	0	0	0	0	0	0	0	0	0.6727	0	0	311416	3.05123e+06	3614946	4758084	4.63566e+06	0	2.00641e+06	0	0	0	0	0	0	0	0	0	0	4379593	0	0	0	3.05123e+06	3614946	4758084
P52293_T61	Kpna2	sp|P52293|IMA1_MOUSE	P52293	NVSSFPDDAtSPLQENR	0.8761	0.4868	0.4875	0.4832	0.4868	0.4234	0.4752	0.8365	0.4818	0.4854	0	0	0	0	0	0	0.4788	0.4801	0.4802	0.4496	0.7672	3.20717e+06	3.16621e+06	3.66375e+06	4758084	4.63566e+06	1.36844e+06	2.00641e+06	1.2959e+06	1482468	0	0	0	0	0	0	3.02651e+06	2.81355e+06	4379593	2.86594e+06	1.71948e+06	3.20717e+06	3.16621e+06	3.66375e+06	4758084
P54227_S25	Stmn1	sp|P54227|STMN1_MOUSE	P54227	ASGQAFELILsPR	0.8967	0	0	0	0	0	0	0	0	0	0	0	0	0	0	0	0	0	0	0	0	0	0	129419	0	0	0	0	0	0	0	0	0	0	0	0	0	0	267480	0	0	0	0	129419	0
P54227_S31	Stmn1	sp|P54227|STMN1_MOUSE	P54227	EsVPDFPLSPPK	0.8642	0.5	0.6213	0.528	0	0	0.6016	0	0	0	0	0	0	0	0.5	0	0	0.5	0.5	0	0	475488	320214	512177	396284	0	525381	0	594447	0	0	0	0	0	0	0	0	470863	819601	0	0	475488	320214	512177	396284
P54227_S38	Stmn1	sp|P54227|STMN1_MOUSE	P54227	ESVPDFPLsPPK	0.9381	0.9321	0	0	0	0.855	0.9195	0.9245	0	0.937	0	0	0	0	0	0.9169	0.9196	0	0.9292	0.7802	0.9239	475488	0	0	0	730654	278679	660723	563312	410191	418031	0	267797	0	0	235600	652502	0	969111	793761	639268	475488	0	0	0
P54227_S63	Stmn1	sp|P54227|STMN1_MOUSE	P54227	sHEAEVLK	1	0	0	0	0	1	0	0	0	0	0	0	0	0	0	0	0	0	0	0	0	275838	445551	304606	109583	204348	0	0	0	0	0	0	0	0	0	0	0	0	0	0	0	275838	445551	304606	109583
P54728_S160	Rad23b	sp|P54728|RD23B_MOUSE	P54728	PAQTPVLTsPAPADSTPGDSSR;PAQTPVLTsPAPADsTPGDSSR;PAQTPVLtsPAPADSTPGDSSR	0.9247	0.3277	0.3314	0.826	0.8829	0.9247	0.6774	0	0	0	0.1979	0	0	0	0	0	0.3227	0.9053	0.8288	0.7921	0.508	389188	1.06581e+06	811398	1.83224e+06	3.70462e+06	2.03575e+06	0	0	0	2.1304e+06	0	0	0	0	0	1.49087e+06	4.56837e+06	5.5183e+06	3.71611e+06	739990	1.04636e+06	1.98955e+06	1.51464e+06	1.15079e+06
P54728_S166	Rad23b	sp|P54728|RD23B_MOUSE	P54728	PAQTPVLTSPAPADsTPGDSSR;PAQTPVLTsPAPADsTPGDSSR	0.8784	0.6533	0.2466	0	0	0.4689	0.4408	0	0.6192	0	0	0	0	0	0.2288	0	0.4708	0	0.785	0.23	0.2298	2291172	6.55527e+06	0	0	3.70462e+06	2.03575e+06	0	2.11975e+06	0	0	0	0	0	0	0	4.58636e+06	0	4615490	2770779	3.06979e+06	1.82573e+06	6.92049e+06	0	0
P54728_S171	Rad23b	sp|P54728|RD23B_MOUSE	P54728	PAQTPVLTSPAPADSTPGDssR	0.8625	0	0	0	0	0	0	0.4867	0	0	0	0	0	0	0	0	0	0.3415	0	0	0	0	0	0	0	0	0	646044	0	0	0	0	0	0	0	0	0	899821	0	0	0	0	0	0	0
P54728_S172	Rad23b	sp|P54728|RD23B_MOUSE	P54728	PAQTPVLTSPAPADSTPGDssR	0.8625	0	0	0	0	0	0	0.4867	0	0	0	0	0	0	0	0	0	0.3415	0	0	0	0	0	0	0	0	0	646044	0	0	0	0	0	0	0	0	0	899821	0	0	0	0	0	0	0
P54728_S235	Rad23b	sp|P54728|RD23B_MOUSE	P54728	EsQAVVDPPPQAVSTGTPQSPAVAAAAATTTATTTTTSGGHPLEFLR	0.8539	0	0	0	0	0.8539	0	0	0	0	0	0	0	0	0	0	0	0	0	0	0	0	0	0	387026	230194	0	0	0	0	0	0	0	0	0	0	0	0	0	0	0	0	0	0	387026
P54728_T155	Rad23b	sp|P54728|RD23B_MOUSE	P54728	PAQtPVLTSPAPADSTPGDSSR	0.9178	0.3048	0.3252	0.8305	0.1429	0.1429	0.315	0.3199	0.1429	0.3211	0.3194	0	0	0	0	0	0.3138	0.3257	0.8977	0.9178	0	1.90198e+06	6.62144e+06	4.54672e+06	1.0627e+06	3203574	2.03575e+06	2039106	2.11975e+06	2.33542e+06	2.1304e+06	0	0	0	0	0	3.84081e+06	3.64361e+06	3.71268e+06	2770779	0	1.90198e+06	6.62144e+06	4.54672e+06	1.0627e+06
P54728_T159	Rad23b	sp|P54728|RD23B_MOUSE	P54728	PAQTPVLtSPAPADSTPGDSSR;PAQTPVLtsPAPADSTPGDSSR	0.9121	0.3277	0.3314	0.826	0.3231	0.4305	0.3794	0.468	0.4794	0.165	0.165	0	0	0	0	0	0.47	0.328	0.8288	0.3176	0.508	0	7118626	5.35811e+06	769545	3203574	2.03575e+06	2039106	2.11975e+06	2335354	2.1304e+06	0	0	0	0	0	4.58624e+06	924655	902808	945418	3809777	0	4357079	3.29049e+06	2.58159e+06
P55258_S181	Rab8a	sp|P55258|RAB8A_MOUSE	P55258	KLEGNsPQGSSHGVK	0.8535	0	0	0	0	0.3333	0	0	0	0	0	0	0	0	0	0	0	0	0	0	0	123345	232210	262961	101236	158041	0	0	99952.2	0	80349	0	0	0	0	0	0	0	175474	0	0	123345	232210	262961	101236
P56399_T605	Usp5	sp|P56399|UBP5_MOUSE	P56399	GtGLQPGEEELPDIAPPLVTPDEPK	0.7533	0	0	0	0	0	0	0.7533	0	0	0	0	0	0	0	0	0	0	0	0.5824	0	0	0	0	0	0	0	194580	0	0	0	0	0	0	0	0	0	0	0	490728	0	0	0	0	0
P56399_T623	Usp5	sp|P56399|UBP5_MOUSE	P56399	GTGLQPGEEELPDIAPPLVtPDEPK	0.9367	0	0	0	0	0	0	0	0	0	0	0	0	0	0	0	0	0	0.5943	0.6469	0.7875	0	0	149117	0	0	0	0	0	0	0	0	0	0	0	0	472648	290838	0	490728	427407	0	0	149117	0
P56812_S119	Pdcd5	sp|P56812|PDCD5_MOUSE	P56812	KVMDsDEDDADY;VMDsDEDDADY	0.9408	0.9399	0.5	0.9165	0.8649	0.5	0.5	0.8863	0.5	0.5	0.5048	0	0	0.5	0.5	0	0.5	0.5	0.5	0.8864	0.5	1058514	1.66051e+06	1.24443e+06	886612	654776	0	0	255110	246819	0	0	0	473172	275179	244436	392887	561753	207189	613346	304926	308118	480509	378264	273602
P56812_Y126	Pdcd5	sp|P56812|PDCD5_MOUSE	P56812	KVMDSDEDDADy;VMDSDEDDADy	0.9174	0	0	0	0	0.777	0	0	0	0	0	0	0	0	0	0	0	0	0	0	0	0	0	0	0	317744	0	0	0	0	0	0	0	0	0	0	0	192095	113510	0	0	0	0	0	0
P57776_S133	Eef1d	sp|P57776|EF1D_MOUSE	P57776	ATAPQTQHVsPMR	0.9388	0	0.9096	0	0.9218	0.9164	0	0	0	0	0	0	0	0	0	0	0.7758	0	0	0.9104	0	0	1.87667e+06	1.06105e+06	1242766	509480	0	0	0	0	0	0	0	0	0	0	1.97456e+06	0	2.32084e+06	0	0	0	848287	883903	477419
P57776_S162	Eef1d	sp|P57776|EF1D_MOUSE	P57776	DIDLFGsDEEEEDK;GATPAEDDEDKDIDLFGsDEEEEDK;KGATPAEDDEDKDIDLFGsDEEEEDK;KGAtPAEDDEDKDIDLFGsDEEEEDK	1	1	1	1	1	1	1	1	1	1	1	1	1	1	1	1	1	1	1	1	1	5083432	3.53223e+06	4.49596e+06	4239785	4520707	3769110	3.24159e+06	3.6996e+06	1.21897e+06	3.16103e+06	4812899	4.15015e+06	1.66137e+06	3.09398e+06	2.46271e+06	3.39904e+06	4503422	3701536	3441307	3.33384e+06	2.98451e+06	2.30695e+06	3.02601e+06	2569902
P57776_T129	Eef1d	sp|P57776|EF1D_MOUSE	P57776	ATAPQtQHVSPMR	0.8658	0.4471	0.4775	0	0.8637	0.4816	0	0	0	0	0.4885	0	0	0	0	0	0	0	0	0	0	567138	1.39876e+06	543413	1.2185e+06	375575	0	0	0	0	0	0	0	0	0	0	0	0	0	0	0	549198	735440	620558	635547
P57776_T147	Eef1d	sp|P57776|EF1D_MOUSE	P57776	GAtPAEDDEDK;GAtPAEDDEDKDIDLFGSDEEEEDK;KGAtPAEDDEDK;KGAtPAEDDEDKDIDLFGsDEEEEDK	1	1	1	1	1	1	0	0.8853	0.5	0.5502	0.6412	0.5	0.6532	0.598	0.7831	0.5	0.5657	0.5	0.5857	0	0.661	2539220	1.36145e+06	2.67976e+06	907832	2145342	0	2009161	2074888	1.95807e+06	1.84762e+06	3.02197e+06	2.42473e+06	3148045	2.2225e+06	1202679	2.40597e+06	3.27975e+06	2.42672e+06	362731	1.818e+06	977763	1340667	1.85611e+06	1.48246e+06
P58742_S495	Aaas	sp|P58742|AAAS_MOUSE	P58742	FsPVLGR	1	0	0	1	1	1	0	0	0	1	0	0	0	0	0	0	1	1	1	1	0	110764	511435	585628	307904	425213	171123	147439	166516	230043	205488	0	0	0	0	0	279240	310007	289837	294793	340801	110764	511435	585628	307904
P58802_S407	Tbc1d10a	sp|P58802|TB10A_MOUSE	P58802	PALQPsPSIR	0.8189	0	0	0	0	0	0	0	0	0	0	0	0	0	0	0	0	0	0	0	0	0	0	0	36329.7	0	0	0	0	0	0	0	0	0	0	0	0	0	0	0	0	0	0	0	36329.7
P58871_S1370	Tnks1bp1	sp|P58871|TB182_MOUSE	P58871	sSGSLSPGLETEDPLEAR	0.8082	0.2479	0	0	0	0.2	0	0	0	0	0	0	0	0	0	0	0	0	0	0	0	198840	155953	0	0	296456	0	0	0	0	0	0	0	0	0	0	0	0	0	0	0	198840	155953	0	0
P58871_S1611	Tnks1bp1	sp|P58871|TB182_MOUSE	P58871	VPssDEEVVEEPQSR	0.8847	0	0	0	0	0.8847	0	0	0	0	0	0	0	0	0	0	0	0	0	0	0	0	0	0	0	88303	0	0	0	0	0	0	0	0	0	0	0	0	0	0	0	0	0	0	0
P58871_S1612	Tnks1bp1	sp|P58871|TB182_MOUSE	P58871	VPssDEEVVEEPQSR	0.8847	0	0	0	0	0.8847	0	0	0	0	0	0	0	0	0	0	0	0	0	0	0	0	0	0	0	88303	0	0	0	0	0	0	0	0	0	0	0	0	0	0	0	0	0	0	0
P58871_S1657	Tnks1bp1	sp|P58871|TB182_MOUSE	P58871	NRsAEEGEVTESK	0.7552	0	0	0	0	0.3333	0	0	0	0	0.7552	0	0	0	0	0	0	0	0	0.3814	0	0	0	91582.5	0	0	0	0	0	0	0	0	0	0	0	0	0	0	0	0	0	0	0	91582.5	0
P58871_S796	Tnks1bp1	sp|P58871|TB182_MOUSE	P58871	HsLGQEVIGIGGSQDESEVPVR	0.8075	0	0	0	0.8075	0.3333	0	0	0	0	0	0	0	0	0	0	0	0	0	0	0	0	0	0	79104.7	41387	0	0	0	0	0	0	0	0	0	0	0	0	0	0	0	0	0	0	79104.7
P59242_S250	Cgn	sp|P59242|CING_MOUSE	P59242	QsPFSSFSR	0.9269	0	0.9269	0	0.8364	0.25	0.25	0	0	0	0.25	0	0	0	0	0	0.25	0.25	0.8559	0.25	0	0	255616	0	0	216761	0	0	174133	0	0	0	0	0	0	0	121427	165609	195387	174472	0	0	255616	0	0
P59242_S326	Cgn	sp|P59242|CING_MOUSE	P59242	KVsLVLEQMQPLGMVSPASTK	0.9304	0	0	0	0	0	0	0	0	0	0	0	0	0	0	0.5865	0	0	0	0	0	0	0	0	0	0	0	0	0	0	0	177106	0	196040	152355	0	0	0	0	0	0	0	0	0	0
P59242_S84	Cgn	sp|P59242|CING_MOUSE	P59242	GGNNRGsPGALSSDSELPENPYSQVK	0.9191	0	0	0.9191	0.1667	0.7786	0	0.1667	0	0	0	0	0	0	0	0	0	0	0	0	0	0	0	295717	362699	213079	0	0	0	0	0	0	0	0	0	0	0	0	0	0	0	0	0	295717	362699
P59325_S387	Eif5	sp|P59325|IF5_MOUSE	P59325	EAEEEssGGEEEDEDENIEVVYSK	0.9402	0.8987	0.9208	0.7834	0.8224	0.8996	0	0	0	0.652	0	0	0	0	0	0	0	0	0	0	0	508767	2.36442e+06	873590	577765	669082	0	0	0	0	0	0	0	0	0	0	0	0	0	0	0	508767	1.97029e+06	640962	406344
P59325_S388	Eif5	sp|P59325|IF5_MOUSE	P59325	EAEEEssGGEEEDEDENIEVVYSK	0.9402	0.8987	0.9208	0.7834	0.8224	0.8996	0	0	0	0.652	0	0	0	0	0	0	0	0	0	0	0	508767	2.36442e+06	873590	577765	669082	0	0	0	0	0	0	0	0	0	0	0	0	0	0	0	508767	1.97029e+06	640962	406344
P59325_S404	Eif5	sp|P59325|IF5_MOUSE	P59325	EAEEESSGGEEEDEDENIEVVysK	0.7768	0	0	0.5264	0	0	0	0	0	0	0	0	0	0	0	0	0	0	0	0	0	509490	659513	738327	0	0	0	0	0	0	0	0	0	0	0	0	0	0	0	0	0	509490	659513	738327	0
P59325_Y403	Eif5	sp|P59325|IF5_MOUSE	P59325	EAEEESSGGEEEDEDENIEVVysK	0.7768	0	0	0.5264	0	0	0	0	0	0	0	0	0	0	0	0	0	0	0	0	0	509490	659513	738327	0	0	0	0	0	0	0	0	0	0	0	0	0	0	0	0	0	509490	659513	738327	0
P61979_S284	Hnrnpk	sp|P61979|HNRPK_MOUSE	P61979	DYDDMsPR	0.9125	0	0.8829	0.9125	0.9048	0	0	0	0	0	0	0	0	0	0	0	0	0	0	0	0	0	245543	0	142680	0	0	0	0	0	0	0	0	0	0	0	0	0	0	0	0	0	245543	0	142680
P62492_S190	Rab11a	sp|P62492|RB11A_MOUSE	P62492	ENDMsPSNNVVPIHVPPTTENKPK	0.8921	0	0	0.4618	0	0.8921	0	0	0	0	0	0	0	0	0	0	0	0	0	0	0	135894	0	189661	92872.4	306285	0	0	0	0	0	0	0	0	0	0	0	0	0	0	0	135894	0	189661	92872.4
P62500_S1051	Tsc22d1	sp|P62500|T22D1_MOUSE	P62500	TLASPEQLAQFQAQLQTGsPPATTQPQGTTQPPAQPASQGSGSTA	0.837	0	0	0.3045	0.837	0.8071	0	0	0	0	0	0	0	0	0	0	0	0	0	0	0	0	0	12617029	11081782	11150451	0	0	0	0	0	0	0	0	0	0	0	0	0	0	0	0	0	12617029	11081782
P62500_T1033	Tsc22d1	sp|P62500|T22D1_MOUSE	P62500	tLASPEQLAQFQAQLQTGSPPATTQPQGTTQPPAQPASQGSGSTA	0.7977	0.4563	0.2032	0.1293	0.1529	0.3191	0.196	0.2655	0	0	0.1626	0	0	0	0	0	0	0	0	0	0	4.50629e+06	5.19019e+06	12617029	11081782	11150451	1.34612e+06	1.48112e+06	0	0	1.74374e+06	0	0	0	0	0	0	0	0	0	0	4.50629e+06	5.19019e+06	12617029	11081782
P62500_T1049	Tsc22d1	sp|P62500|T22D1_MOUSE	P62500	TLASPEQLAQFQAQLQtGSPPATTQPQGTTQPPAQPASQGSGSTA	0.8378	0.4193	0.8378	0.2515	0	0.589	0	0	0	0	0	0	0	0	0	0	0	0	0.3897	0	0	4.50629e+06	5.19019e+06	11519471	0	11150451	0	0	0	0	0	0	0	0	0	0	0	0	4.51002e+06	0	0	4.50629e+06	5.19019e+06	11519471	0
P62878_S11	Rbx1	sp|P62878|RBX1_MOUSE	P62878	AAAMDVDTPsGTNSGAGK	0.8588	0.8588	0	0	0	0.3072	0	0	0	0	0	0	0	0	0	0	0	0.7515	0	0	0	280446	0	0	0	0	0	0	0	0	0	0	0	0	0	0	527033	825426	0	0	0	280446	0	0	0
P62878_T9	Rbx1	sp|P62878|RBX1_MOUSE	P62878	AAAMDVDtPSGTNSGAGK;AAAMDVDtPSGTNSGAGKK	0.9333	0.427	0.7973	0.25	0.25	0.8958	0.25	0.25	0	0.25	0.25	0	0	0	0	0	0	0.9333	0.3296	0.445	0.25	521832	331584	214322	273128	241706	0	0	0	0	353110	0	0	0	0	0	0	825426	569348	650196	420875	266038	365418	236191	300997
P62908_S224	Rps3	sp|P62908|RS3_MOUSE	P62908	DEILPTTPIsEQK	0.9236	0	0	0.8408	0	0.7528	0	0	0	0	0	0	0	0	0	0	0	0	0	0	0	0	0	808175	0	1.56288e+06	0	0	0	0	0	0	0	0	0	0	0	0	0	0	0	0	0	808175	0
P62908_T220	Rps3	sp|P62908|RS3_MOUSE	P62908	DEILPtTPISEQK	0.9078	0	0.3333	0.3333	0.49	0.3333	0.3333	0	0	0.3333	0	0	0	0	0	0	0.4717	0.49	0.3333	0.3333	0.3333	0	934823	808175	0	1.56288e+06	0	0	0	0	0	0	0	0	0	0	373803	476629	0	450206	506646	0	934823	808175	0
P62908_T221	Rps3	sp|P62908|RS3_MOUSE	P62908	DEILPTtPISEQK	0.9101	0	0.4248	0	0	0	0	0	0	0	0	0	0	0	0	0	0	0	0	0	0	1.14567e+06	934823	0	0	0	0	0	0	0	0	0	0	0	0	0	0	0	0	0	0	1.14567e+06	934823	0	0
P62996_S2	Tra2b	sp|P62996|TRA2B_MOUSE	P62996	sDSGEQNYGER	0.8726	0	0.8726	0	0.85	0	0	0	0	0	0	0	0	0	0	0	0	0	0	0	0	0	164402	131889	83376.8	106978	0	0	0	0	0	0	0	0	0	0	0	0	0	0	0	0	164402	131889	83376.8
P63028_S46	Tpt1	sp|P63028|TCTP_MOUSE	P63028	TEGAIDDsLIGGNASAEGPEGEGTESTVVTGVDIVMNHHLQETSFTK	0.772	0	0	0	0	0	0	0	0	0	0	0	0	0	0	0	0	0	0	0	0	0	0	0	0	0	0	0	0	0	0	0	0	0	0	0	0	2.47853e+06	0	0	0	0	0	0	0
P63028_S53	Tpt1	sp|P63028|TCTP_MOUSE	P63028	TEGAIDDSLIGGNAsAEGPEGEGTESTVVTGVDIVMNHHLQETSFTK	0.9023	0	0	0	0.8875	0	0	0	0	0	0	0	0	0	0	0	0	0	0	0	0	0	0	0	2.33178e+06	0	0	0	0	0	0	0	0	0	0	0	0	0	0	0	0	0	0	0	2.33178e+06
P63028_T39	Tpt1	sp|P63028|TCTP_MOUSE	P63028	tEGAIDDSLIGGNASAEGPEGEGTESTVVTGVDIVMNHHLQETSFTK	0.8161	0	0	0	0.8161	0	0	0	0	0.1299	0.3942	0	0	0	0	0	0	0	0.4433	0.3979	0	0	0	0	2.12461e+06	0	0	0	0	2.24195e+06	2.32328e+06	0	0	0	0	0	0	0	2.0022e+06	0	3.34711e+06	0	0	0	2.12461e+06
P63085_T179	Mapk1	sp|P63085|MK01_MOUSE	P63085	VADPDHDHtGFLTEYVATR;VADPDHDHtGFLtEYVATR	0.8194	0.5	0.5	0.5172	0.5	0.5	0	0.5174	0	0	0.5	0	0	0	0	0	0.5	0.5	0	0	0.6009	1.05609e+06	767000	1.08687e+06	1.35297e+06	921391	0	565144	0	0	498293	0	0	0	0	0	646489	1.04015e+06	0	0	1014784	779856	747129	799358	995232
P63085_T183	Mapk1	sp|P63085|MK01_MOUSE	P63085	VADPDHDHTGFLtEyVATR;VADPDHDHtGFLtEYVATR	0.8227	0.6937	0.6361	0.6309	0.5	0.5	0	0.4942	0	0	0.5	0	0	0	0	0	0.5	0.5799	0	0.8227	0.6009	1878889	1.39438e+06	1.80645e+06	1.35297e+06	921391	0	565144	0	0	498293	0	0	0	0	0	646489	2.08029e+06	0	1.23733e+06	1014784	841561	719061	810819	1.05111e+06
P63085_T188	Mapk1	sp|P63085|MK01_MOUSE	P63085	VADPDHDHTGFLTEyVAtR	0.9257	0	0	0.8623	0.9257	0	0	0	0	0	0	0	0	0	0	0	0	0	0	0.8235	0	0	0	295009	1.21384e+06	0	582195	0	443521	317304	0	0	0	0	0	0	0	0	670421	1.23733e+06	0	0	0	295009	1.21384e+06
P63085_Y185	Mapk1	sp|P63085|MK01_MOUSE	P63085	VADPDHDHTGFLTEyVAtR;VADPDHDHTGFLtEyVATR	0.9257	0.682	0.6361	0.8623	0.9257	0	0	0	0	0	0	0	0	0	0	0	0	0.5799	0	0.8227	0	822802	627376	1.01459e+06	1.21384e+06	0	582195	0	443521	317304	0	0	0	0	0	0	0	1.04015e+06	670421	2.47466e+06	0	818823	624342	716092	1.20798e+06
P68373_S48	Tuba1c	sp|P68373|TBA1C_MOUSE	P68373	TIGGGDDsFNTFFSETGAGK	0.8684	0	0	0.2468	0	0.497	0.2433	0	0	0	0	0	0	0	0	0	0	0	0.4589	0	0	0	0	351184	0	1.23199e+06	0	0	0	0	0	0	0	0	0	0	0	0	774628	0	0	0	0	351184	0
P68373_T41	Tuba1c	sp|P68373|TBA1C_MOUSE	P68373	tIGGGDDSFNTFFSETGAGK	0.8928	0.3079	0.4782	0.2	0.4817	0.441	0	0	0.3237	0.2	0.2	0	0	0	0	0	0.3316	0.2	0	0.7724	0.4364	892923	0	576825	619542	1.23199e+06	0	0	0	0	407289	0	0	0	0	0	588989	669603	0	497146	0	892923	0	576825	619542
P68373_T51	Tuba1c	sp|P68373|TBA1C_MOUSE	P68373	TIGGGDDSFNtFFSETGAGK	0.914	0.8035	0	0	0.914	0	0	0	0	0	0	0	0	0	0	0	0	0	0	0	0	892923	0	0	619542	0	0	0	0	0	0	0	0	0	0	0	0	0	0	0	0	892923	0	0	619542
P70166_S203	Cpeb1	sp|P70166|CPEB1_MOUSE	P70166	SSSPSDSDTSGFSSGSDHLSDLISsLR	0.788	0	0	0	0	0	0	0.6181	0	0	0	0	0	0	0	0	0	0	0	0	0	0	0	0	0	0	0	635427	0	0	465805	0	0	0	0	0	0	0	0	0	0	0	0	0	0
P70166_S245	Cpeb1	sp|P70166|CPEB1_MOUSE	P70166	MDQEQAALAAVAPsPTSAPK	0.9336	0	0.3333	0	0.3333	0.3333	0.8916	0.4891	0.9336	0.9327	0.9219	0	0	0	0	0	0.9099	0.5337	0.7713	0.4592	0.3333	184075	269699	194785	0	92991	2.90693e+06	4.8702e+06	4.41522e+06	4.64526e+06	2846161	0	324006	0	0	0	2.72637e+06	3038319	2581489	1.974e+06	3304018	103402	134002	97270.7	0
P70166_S248	Cpeb1	sp|P70166|CPEB1_MOUSE	P70166	MDQEQAALAAVAPSPTsAPK	0.896	0	0	0	0	0	0	0.896	0.8177	0	0.8127	0	0.4029	0	0	0	0	0	0	0.7666	0	0	0	0	0	0	0	1.77803e+06	1.62486e+06	0	1.36777e+06	0	324006	210688	0	0	0	0	0	837971	0	0	0	0	0
P70166_S81	Cpeb1	sp|P70166|CPEB1_MOUSE	P70166	MLFPTsAQESPR	0.934	0	0	0	0	0	0.934	0.49	0	0.4667	0	0	0	0	0	0	0.4824	0	0	0.4558	0.7321	0	0	0	0	0	1.33466e+06	1.38561e+06	0	1.3603e+06	0	0	0	0	0	0	714138	0	0	918149	802810	0	0	0	0
P70166_S85	Cpeb1	sp|P70166|CPEB1_MOUSE	P70166	MLFPTSAQEsPR	0.9067	0	0	0	0	0	0	0.9048	0.9067	0.7542	0.8617	0	0	0	0	0	0.8415	0.5709	0.8452	0	0.5686	0	0	0	0	0	0	1.8082e+06	1.32135e+06	738579	1.33088e+06	0	486492	0	0	0	714138	794888	726187	0	734719	0	0	0	0
P70166_T247	Cpeb1	sp|P70166|CPEB1_MOUSE	P70166	MDQEQAALAAVAPSPtSAPK	0.8163	0	0	0	0	0	0.4601	0	0	0	0.8163	0	0	0	0	0	0.4449	0.3705	0	0.4484	0	0	0	0	0	0	1.28766e+06	0	0	0	847440	0	0	0	180541	167709	996283	1.42864e+06	0	837971	0	0	0	0	0
P70166_T80	Cpeb1	sp|P70166|CPEB1_MOUSE	P70166	MLFPtSAQESPR	0.8903	0	0	0	0	0.3333	0.5576	0.4839	0.4892	0.5299	0.4867	0.3333	0.3333	0.6939	0.3333	0.3333	0.3333	0.3333	0.4157	0.49	0.8903	0	0	0	0	0	1.33466e+06	1.8082e+06	1352013	1.3603e+06	1.33088e+06	517364	345414	579488	305211	382764	787274	794888	793636	755346	802810	0	0	0	0
P70288_S394	Hdac2	sp|P70288|HDAC2_MOUSE	P70288	MLPHAPGVQMQAIPEDAVHEDsGDEDGEDPDKR	1	0	0	0	0	0	0	0	0	0	0	0	0	0	0	0	0	0	0	0	0	0	0	0	0	0	0	0	0	0	0	275103	0	0	191224	194510	0	0	0	0	0	0	0	0	0
P70288_S422	Hdac2	sp|P70288|HDAC2_MOUSE	P70288	IACDEEFsDsEDEGEGGR	1	0	0	0	0	0	0	0	0	0	0	0	0	0	0	0	0	0	0	0	0	0	285376	0	0	0	0	0	0	0	0	0	0	0	0	0	0	0	0	0	0	0	285376	0	0
P70288_S424	Hdac2	sp|P70288|HDAC2_MOUSE	P70288	IACDEEFsDsEDEGEGGR	1	0	0	0	0	0	0	0	0	0	0	0	0	0	0	0	0	0	0	0	0	0	285376	0	0	0	0	0	0	0	0	0	0	0	0	0	0	0	0	0	0	0	285376	0	0
P70398_S1600	Usp9x	sp|P70398|USP9X_MOUSE	P70398	NGILAIEGTGSDVDDDMsGDEK	0.8984	0	0	0.729	0	0.8984	0	0	0	0	0	0	0	0	0	0	0	0	0	0	0	0	127646	151013	148260	242595	0	0	0	0	0	0	0	0	0	0	0	0	0	0	0	0	127646	151013	148260
P70398_S2547	Usp9x	sp|P70398|USP9X_MOUSE	P70398	AQENYEGGEEVsPPQTK	0.9211	0.9106	0.491	0.9052	0.8593	0.4896	0	0	0	0	0	0	0	0	0	0	0	0	0	0.4656	0	1.27067e+06	1.31601e+06	1.57488e+06	1969727	1.30306e+06	0	0	0	304787	0	0	0	0	0	0	481520	0	0	395376	0	1.27067e+06	1.31601e+06	1.57488e+06	1969727
P70398_T2551	Usp9x	sp|P70398|USP9X_MOUSE	P70398	AQENYEGGEEVSPPQtK	0.9173	0.4807	0	0.873	0.8887	0.9173	0	0	0	0	0	0	0	0	0	0	0	0.6921	0	0	0	1.27067e+06	0	1.57488e+06	1969727	1.1128e+06	0	0	0	0	0	0	0	0	0	0	0	332886	0	0	0	1.27067e+06	0	1.57488e+06	1969727
P70398_Y2540	Usp9x	sp|P70398|USP9X_MOUSE	P70398	AQENyEGGEEVSPPQTK	0.917	0.3333	0.3333	0.3333	0.3333	0.4864	0	0	0	0.4612	0	0	0	0	0	0	0	0	0.3333	0	0	1.27067e+06	1.31601e+06	857593	1969727	1.1128e+06	254143	0	0	304787	0	0	0	0	0	0	440562	0	494699	0	410867	1.27067e+06	1.31601e+06	857593	1969727
P70670_S2123	Naca	sp|P70670|NACAM_MOUSE	P70670	VQGEAVsNIQENTQTPTVQEESEEEEVDETGVEVK	0.8671	0	0	0	0.1667	0.1667	0	0	0.194	0	0	0	0	0	0	0	0	0	0	0	0	381924	574246	577829	508651	319218	0	0	0	0	0	0	0	0	0	0	0	0	0	0	0	381924	574246	577829	508651
P70670_T2146	Naca	sp|P70670|NACAM_MOUSE	P70670	VQGEAVSNIQENTQTPTVQEESEEEEVDEtGVEVK	0.8912	0	0	0	0	0	0	0	0	0	0	0	0	0	0	0	0	0	0	0	0	167327	582554	0	0	0	0	0	0	0	0	0	0	0	0	0	0	0	0	0	0	167327	582554	0	0
P70698_T581	Ctps1	sp|P70698|PYRG1_MOUSE	P70698	SGSSSPDSEItELK	0.8263	0	0	0	0	0	0	0	0	0	0	0	0	0	0	0	0	0.4109	0	0	0	0	0	0	0	0	0	0	0	0	0	0	0	0	0	0	0	429381	0	0	0	0	0	0	0
P97379_S141	G3bp2	sp|P97379|G3BP2_MOUSE	P97379	YEDEVFGDsEPELDEEsEDEVEEEQEDR	0.87	0	0	0.8252	0	0.87	0	0	0	0	0	0	0	0	0	0	0	0	0	0	0	0	550305	322683	0	510160	0	0	0	0	0	0	0	0	0	0	0	0	0	0	0	0	550305	322683	0
P97379_S149	G3bp2	sp|P97379|G3BP2_MOUSE	P97379	YEDEVFGDsEPELDEEsEDEVEEEQEDR;yEDEVFGDSEPELDEEsEDEVEEEQEDR	0.87	0	0	0.8252	0	0.87	0.6786	0	0	0	0	0	0	0	0	0	0	0	0	0	0	0	550305	322683	0	510160	0	0	0	0	0	0	0	0	0	0	0	0	0	0	0	0	550305	322683	0
P97379_S225	G3bp2	sp|P97379|G3BP2_MOUSE	P97379	sATPPPAEPASLPQEPPK	0.8519	0.4903	0.6107	0.4236	0.4863	0.4902	0.4886	0	0.3333	0.4764	0.4761	0	0.3749	0	0.4872	0.4847	0.4889	0.4881	0.489	0.4582	0.4881	847327	964912	872377	1.09699e+06	1053374	586691	356705	473572	354503	625175	595252	425291	441295	333420	0	1.12254e+06	1371970	1.5498e+06	1.04724e+06	1.12496e+06	847327	964912	872377	1.09699e+06
P97379_S235	G3bp2	sp|P97379|G3BP2_MOUSE	P97379	SATPPPAEPAsLPQEPPK	0.9061	0	0.6086	0	0.5451	0.9061	0	0	0	0	0	0	0	0	0	0	0	0	0.4546	0.5102	0	192209	923513	161505	428131	1053374	0	0	0	0	0	0	0	0	0	0	0	0	1.5498e+06	1.04724e+06	0	192209	923513	161505	428131
P97379_T227	G3bp2	sp|P97379|G3BP2_MOUSE	P97379	SAtPPPAEPASLPQEPPK	0.8903	0	0	0	0	0	0	0	0	0	0	0	0	0	0	0	0	0	0	0	0	0	0	0	0	226565	0	0	0	0	0	0	0	0	0	0	307089	0	0	0	0	0	0	0	0
P97440_S20	Slbp	sp|P97440|SLBP_MOUSE	P97440	DGGAsPRsPAR;RDGGAsPRsPAR	1	0	1	1	0	1	0	0	0	0	0	0	0	0	0	0	0	0	0	0	0	1.23058e+06	1.60801e+06	1.2486e+06	844500	1.72705e+06	0	0	0	0	0	0	0	0	0	0	0	0	0	0	0	927767	1.20043e+06	937944	633707
P97440_S23	Slbp	sp|P97440|SLBP_MOUSE	P97440	DGGAsPRsPAR;RDGGAsPRsPAR	1	0	1	1	0	1	0	0	0	0	0	0	0	0	0	0	0	0	0	0	0	1.23058e+06	1.60801e+06	1.2486e+06	844500	1.72705e+06	0	0	0	0	0	0	0	0	0	0	0	0	0	0	0	927767	1.20043e+06	937944	633707
P97440_S7	Slbp	sp|P97440|SLBP_MOUSE	P97440	sPPGYGSR	0.94	0.94	0	0.3333	0	0.9386	0	0	0	0	0	0	0	0	0	0	0	0	0	0	0	0	157354	0	0	144930	0	0	0	0	0	0	0	0	0	0	0	0	0	0	0	0	157354	0	0
P97825_S131	Jpt1	sp|P97825|JUPI1_MOUSE	P97825	GEGDMHENVDTDFQANLAQMEEKPVPAAPVPsPVAPAPVPSR;PVPAAPVPsPVAPAPVPSR	0.9407	0.9354	0.9347	0.8585	0.5	0.9291	0.6914	0.9365	0.9393	0.5361	0.8541	0	0	0	0	0	0.9368	0.9305	0.9373	0.9331	0.9243	849991	705136	678742	132376	801822	0	1.03938e+06	1.74045e+06	1.98235e+06	959312	0	0	0	0	0	1.31171e+06	965453	2028500	2.73826e+06	2.70999e+06	621282	517728	514949	270034
P97825_S140	Jpt1	sp|P97825|JUPI1_MOUSE	P97825	GEGDMHENVDTDFQANLAQMEEKPVPAAPVPSPVAPAPVPsR;PVPAAPVPSPVAPAPVPsR	0.9265	0	0	0	0.836	0.9265	0.8496	0.6558	0.5763	0	0.68	0	0	0	0	0	0.8008	0.3883	0.7841	0.8545	0	0	0	0	0	221702	1.03861e+06	694044	737322	0	1.15852e+06	0	0	0	0	0	1199755	627731	595198	1.52168e+06	180960	0	0	0	0
P97825_S49	Jpt1	sp|P97825|JUPI1_MOUSE	P97825	MAsNIFGTPEENPPSWAK	0.8323	0.4895	0	0.3333	0.7352	0.8323	0	0	0	0	0	0	0	0	0	0	0	0	0	0	0	388676	0	0	621234	142116	0	0	0	0	0	0	0	0	0	0	0	0	0	0	0	388676	0	0	621234
P97825_S61	Jpt1	sp|P97825|JUPI1_MOUSE	P97825	MASNIFGTPEENPPsWAK	0.8117	0.8117	0	0	0.6892	0	0	0	0	0	0	0	0	0	0	0	0	0	0	0	0	388676	0	0	621234	0	0	0	0	0	0	0	0	0	0	0	0	0	0	0	0	388676	0	0	621234
P97825_S85	Jpt1	sp|P97825|JUPI1_MOUSE	P97825	sNSSEASSGDFLDLK	0.8653	0.3281	0.2	0.2	0.3206	0.3245	0.4703	0.3278	0.2	0.3168	0.2	0	0.2	0	0	0	0.2	0.4235	0.4727	0.2	0.3161	656571	589341	439383	0	826472	0	253845	313110	0	333730	0	0	0	0	222680	384797	544339	665569	709833	526602	656571	589341	439383	0
P97825_S92	Jpt1	sp|P97825|JUPI1_MOUSE	P97825	SNSSEASsGDFLDLK	0.8564	0	0.3598	0	0.8564	0	0	0	0	0	0	0	0	0	0	0	0	0	0	0	0	0	589341	0	0	0	0	0	0	0	0	0	0	0	0	0	0	0	0	0	0	0	589341	0	0
P97825_T110	Jpt1	sp|P97825|JUPI1_MOUSE	P97825	GEGDMHENVDtDFQANLAQMEEKPVPAAPVPSPVAPAPVPSR	0.9224	0	0	0	0	0	0.8674	0.5052	0.3333	0.4779	0	0	0	0	0	0	0	0.7772	0.6744	0.9224	0	0	0	0	0	0	0	794638	709799	879516	0	0	0	0	0	0	0	627731	956876	1521736	0	0	0	0	0
P97825_T54	Jpt1	sp|P97825|JUPI1_MOUSE	P97825	MASNIFGtPEENPPSWAK	0.752	0.752	0	0	0	0	0	0	0	0	0	0	0	0	0	0	0	0	0	0	0	388676	0	0	0	0	0	0	0	0	0	0	0	0	0	0	0	0	0	0	0	0	0	0	0
P97825_T82	Jpt1	sp|P97825|JUPI1_MOUSE	P97825	SSGGREDSESPGtQR	0.7983	0	0	0.7983	0	0	0	0	0	0	0	0	0	0	0	0	0	0	0	0	0	0	859183	820448	0	0	0	0	0	0	0	0	0	0	0	0	0	0	0	0	0	0	859183	820448	0
P98078_S393	Dab2	sp|P98078|DAB2_MOUSE	P98078	ssPNPFVGSPPK	0.8342	0	0	0.6667	0	0	0	0	0	0	0	0	0	0	0	0	0	0.6718	0	0	0	114731	145061	119895	0	0	0	0	0	0	0	0	0	0	0	0	0	0	0	0	0	114731	145061	119895	0
P98078_S394	Dab2	sp|P98078|DAB2_MOUSE	P98078	ssPNPFVGSPPK	0.8342	0	0	0.6667	0	0	0	0	0	0	0	0	0	0	0	0	0	0.6718	0	0	0	114731	145061	119895	0	0	0	0	0	0	0	0	0	0	0	0	0	0	0	0	0	114731	145061	119895	0
P98191_T33	Cds1	sp|P98191|CDS1_MOUSE	P98191	EGEAAGGDHEtESTSDKETDIDDR	0.8488	0	0	0	0.5631	0	0	0	0	0	0	0	0	0	0	0	0	0	0	0.2	0.2	0	376810	578096	600377	0	202042	222694	154997	173638	0	0	0	0	0	0	231581	304341	267872	264454	317741	0	376810	578096	600377
P99027_S102	Rplp2	sp|P99027|RLA2_MOUSE	P99027	KEEsEEsDDDMGFGLFD	1	1	1	1	1	1	0	0	1	0	1	0	0	0	0	0	0	0	0	0	0	1.15215e+06	1.652e+06	1.7636e+06	772100	2.06528e+06	1212702	1.77525e+06	1.36057e+06	808836	964045	0	0	0	0	0	1.30048e+06	1.43039e+06	1721272	805392	925470	1.17805e+06	1.68914e+06	1.80324e+06	789456
P99027_S105	Rplp2	sp|P99027|RLA2_MOUSE	P99027	KEEsEEsDDDMGFGLFD	1	1	1	1	1	1	0	0	1	0	1	0	0	0	0	0	0	0	0	0	0	1.15215e+06	1.652e+06	1.7636e+06	772100	2.06528e+06	1212702	1.77525e+06	1.36057e+06	808836	964045	0	0	0	0	0	1.30048e+06	1.43039e+06	1721272	805392	925470	1.17805e+06	1.68914e+06	1.80324e+06	789456
P99027_S64	Rplp2	sp|P99027|RLA2_MOUSE	P99027	LAsVPAGGAVAVSAAPGSAAPAAGSAPAAAEEK	0.9224	0.6629	0.25	0.4099	0	0.25	0	0	0	0	0	0	0	0	0	0	0	0	0.9224	0	0	540221	377620	608725	0	151514	0	0	0	0	0	0	0	0	0	0	0	0	714980	431793	0	540221	377620	608725	0
P99027_S79	Rplp2	sp|P99027|RLA2_MOUSE	P99027	LASVPAGGAVAVSAAPGsAAPAAGSAPAAAEEK	0.9308	0	0	0	0.8502	0.9285	0	0	0	0	0	0	0	0	0	0	0	0	0	0	0	0	0	0	500657	467602	0	0	0	0	0	0	0	0	0	0	0	0	0	0	0	0	0	0	500657
P99027_S86	Rplp2	sp|P99027|RLA2_MOUSE	P99027	LASVPAGGAVAVSAAPGSAAPAAGsAPAAAEEK	0.779	0	0	0	0	0.779	0	0	0	0	0	0	0	0	0	0	0	0	0	0	0	0	0	0	0	467602	0	0	0	0	0	0	0	0	0	0	0	0	0	0	0	0	0	0	0
Q02053_S46	Uba1	sp|Q02053|UBA1_MOUSE	Q02053	NGsEADIDESLYSR	0.9355	0.9059	0.9287	0.8857	0.896	0.9355	0	0	0	0	0	0	0	0	0	0	0	0.8559	0.8514	0.5506	0.833	279155	471453	452399	341733	340886	0	0	0	0	0	0	0	0	0	0	0	201724	0	0	0	279155	471453	452399	341733
Q04447_S199	Ckb	sp|Q04447|KCRB_MOUSE	Q04447	PVsPLLLASGMAR	0.9387	0	0	0	0	0.774	0	0	0	0	0	0	0	0	0	0	0	0	0	0	0	0	0	54804.7	0	110773	0	0	0	0	0	0	0	0	0	0	0	0	0	0	0	0	0	62436.3	0
Q05512_S453	Mark2	sp|Q05512|MARK2_MOUSE	Q05512	VPAsPLPGLDR	1	1	1	1	1	1	1	1	1	1	0	1	0	0	0	0	1	1	0	1	1	171952	293974	244025	116999	256339	207311	246459	188764	261734	204919	136220	168558	290170	84929.4	127154	206663	278631	96579.5	226820	231589	171952	293974	244025	116999
Q05915_S24	Gch1	sp|Q05915|GCH1_MOUSE	Q05915	ELPRPGAsPPAEK	1	1	1	1	1	1	0	0	0	0	0	0	0	0	0	0	0	0	0	0	0	224246	298198	331503	426810	456737	0	0	0	0	0	0	0	0	0	0	0	0	0	0	0	122606	311316	196232	229764
Q05A80_S391	Caprin2	sp|Q05A80|CAPR2_MOUSE	Q05A80	VGsPQEEQNVQETPK	0.9216	0	0	0	0.5	0	0.6015	0.9216	0.5469	0.9205	0.9048	0.8413	0.7048	0.5	0.5	0	0.7644	0.8099	0.5	0.5365	0.5	0	0	0	0	0	0	0	0	576344	0	0	0	0	0	0	748808	706686	739515	0	0	0	0	0	0
Q05A80_S634	Caprin2	sp|Q05A80|CAPR2_MOUSE	Q05A80	PAsALASPNPPLSK	0.9256	0	0	0	0	0	0.4747	0.3333	0.3333	0.4529	0.4379	0.45	0.4745	0.4676	0.3333	0.9256	0	0.683	0.4699	0.4347	0.4202	0	0	0	0	0	900269	696398	811677	1.23372e+06	909416	607042	556496	820339	661290	670861	263195	460471	622882	504660	504031	0	0	0	0
Q05A80_S638	Caprin2	sp|Q05A80|CAPR2_MOUSE	Q05A80	PASALAsPNPPLSK	0.9274	0	0	0	0	0	0.8642	0.4859	0.7805	0.9274	0	0	0.4856	0.4839	0	0.912	0	0	0	0	0.4757	0	0	0	0	0	485462	347940	447302	979614	0	0	556496	820339	0	376359	0	0	175807	0	380870	0	0	0	0
Q05A80_S644	Caprin2	sp|Q05A80|CAPR2_MOUSE	Q05A80	PASALASPNPPLsK	0.9128	0	0	0	0	0	0	0.5074	0	0.881	0	0	0	0.7172	0	0	0.3783	0	0	0	0	0	0	0	0	0	0	394535	0	796121	0	0	0	820339	0	0	358044	0	0	0	0	0	0	0	0
Q07113_S2393	Igf2r	sp|Q07113|MPRI_MOUSE	Q07113	AEALSsLHGDDQDSEDEVLTVPEVK	0.7763	0	0	0	0	0	0	0	0	0	0	0	0.7763	0	0	0	0	0	0	0	0	0	0	0	0	0	0	0	0	0	0	435935	462775	0	0	0	0	0	0	0	0	0	0	0	0
Q07113_S2401	Igf2r	sp|Q07113|MPRI_MOUSE	Q07113	AEALSSLHGDDQDsEDEVLTVPEVK	0.8751	0.465	0	0.4747	0.4053	0	0.478	0	0	0	0	0	0	0	0.4705	0.454	0	0	0	0.4627	0	390542	0	304415	269088	0	0	269088	0	0	241021	0	0	0	324087	0	0	0	0	351414	313589	390542	0	304415	269088
Q07113_T2407	Igf2r	sp|Q07113|MPRI_MOUSE	Q07113	AEALSSLHGDDQDSEDEVLtVPEVK	0.8598	0	0	0	0.6287	0	0	0	0	0.7948	0.475	0	0	0	0	0	0	0	0	0	0	0	0	0	269088	0	0	0	0	0	256652	0	0	0	324087	0	0	0	0	0	0	0	0	0	269088
Q08943_S444	Ssrp1	sp|Q08943|SSRP1_MOUSE	Q08943	EGINPGYDDYADsDEDQHDAYLER	0.8272	0	0	0.4149	0	0	0	0	0	0	0	0	0	0	0	0	0	0	0	0.3649	0	0	0	536526	0	586688	0	0	0	0	0	0	0	0	0	0	0	863735	0	748314	0	0	0	911659	0
Q08943_Y452	Ssrp1	sp|Q08943|SSRP1_MOUSE	Q08943	EGINPGYDDYADSDEDQHDAyLER	0.8985	0	0	0	0	0	0.2616	0	0	0	0	0.4898	0	0	0	0	0	0	0	0	0	0	296239	0	0	0	476951	0	0	0	0	714710	0	0	0	0	0	229751	0	1.09949e+06	254720	0	452032	0	0
Q2TBE6_T466	Pi4k2a	sp|Q2TBE6|P4K2A_MOUSE	Q2TBE6	SASESYtQSFQSR	0.9156	0	0	0	0	0.9156	0	0	0	0	0	0	0	0	0	0	0	0	0	0	0	0	0	0	0	480104	0	0	0	0	0	0	0	0	0	0	0	0	0	0	0	0	0	0	0
Q3B7Z2_S188	Osbp	sp|Q3B7Z2|OSBP1_MOUSE	Q3B7Z2	MLAEsDDsGDEESVSQTDK	0.8925	0.4	0.4	0	0.4	0.4	0.4	0	0.4	0.4	0	0	0	0	0	0	0	0	0	0	0.4	0	0	0	0	368888	0	0	0	0	0	0	0	0	0	0	0	0	0	0	0	0	0	0	0
Q3B7Z2_S191	Osbp	sp|Q3B7Z2|OSBP1_MOUSE	Q3B7Z2	MLAEsDDsGDEESVSQTDK	0.8925	0.4	0.4	0	0.4	0.4	0.4	0	0.4	0.4	0	0	0	0	0	0	0	0	0	0	0.4	0	0	0	0	368888	0	0	0	0	0	0	0	0	0	0	0	0	0	0	0	0	0	0	0
Q3B7Z2_S333	Osbp	sp|Q3B7Z2|OSBP1_MOUSE	Q3B7Z2	GATVLPANPPGsAGsGK	0.924	0.772	0.868	0.7634	0	0.9119	0	0	0	0	0	0	0	0	0	0	0	0	0	0	0	266462	420560	296880	428651	330412	0	0	0	0	0	0	0	0	0	0	0	0	0	0	0	266462	420560	296880	428651
Q3B7Z2_S336	Osbp	sp|Q3B7Z2|OSBP1_MOUSE	Q3B7Z2	GATVLPANPPGsAGsGK	0.924	0.7691	0.868	0.7634	0	0.912	0	0	0	0	0	0	0	0	0	0	0	0	0	0	0	266462	420560	296880	428651	330412	0	0	0	0	0	0	0	0	0	0	0	0	0	0	0	266462	420560	296880	428651
Q3TDQ1_S495	Stt3b	sp|Q3TDQ1|STT3B_MOUSE	Q3TDQ1	ENPPVEDssDEDDK;RENPPVEDssDEDDK	1	0	1	0	0	0	0	0	0	0	0	0	0	0	0	0	0	0	0	1	0	108746	344790	0	0	0	0	0	0	0	0	0	0	0	0	0	0	0	0	0	0	108746	344790	0	0
Q3TDQ1_S496	Stt3b	sp|Q3TDQ1|STT3B_MOUSE	Q3TDQ1	ENPPVEDssDEDDK;RENPPVEDssDEDDK	1	0	1	0	0	0	0	0	0	0	0	0	0	0	0	0	0	0	0	1	0	108746	344790	0	0	0	0	0	0	0	0	0	0	0	0	0	0	0	0	0	0	108746	344790	0	0
Q3THE2_S29	Myl12b	sp|Q3THE2|ML12B_MOUSE	Q3THE2	ATSNVFAMFDQsQIQEFK	0.9074	0	0	0	0.771	0.6003	0	0	0.585	0	0	0	0	0	0	0	0	0	0	0	0	0	0	0	0	0	0	0	478516	0	0	0	773381	1.16204e+06	314312	0	0	0	0	0	0	0	0	0	0
Q3TLH4_S102	Prrc2c	sp|Q3TLH4|PRC2C_MOUSE	Q3TLH4	APEVsPAQPK	1	1	1	1	1	1	0	0	0	0	0	0	0	0	0	0	0	1	0	0	0	102269	308232	118131	126516	116072	0	0	0	0	0	0	0	0	0	0	118541	208229	167511	0	0	102269	180223	118131	77542.9
Q3TWL2_S169	Pip4p1	sp|Q3TWL2|PP4P1_MOUSE	Q3TWL2	IINLGPVHPGPLsPEPQPMGVR	1	0	0	0	0	0	0	1	0	0	0	0	0	0	0	0	0	0	0	1	1	0	0	0	46312.4	0	235983	287968	172008	323085	444779	0	0	0	0	0	327644	238377	277066	420323	319584	0	0	0	46312.4
Q3TWL2_S96	Pip4p1	sp|Q3TWL2|PP4P1_MOUSE	Q3TWL2	VCQsPINVEGK	1	0	0	0	0	0	0	0	0	0	0	0	0	0	0	0	0	0	0	0	0	0	0	0	77578.8	0	0	0	0	0	0	0	0	0	0	0	0	0	0	0	0	0	0	0	77578.8
Q3TXS7_S290	Psmd1	sp|Q3TXS7|PSMD1_MOUSE	Q3TXS7	TVGTPIASVPGSTNTGTVPGsEK	0.7519	0	0	0.7231	0	0.7519	0	0	0	0	0	0	0	0	0	0	0	0	0	0	0	312657	0	324137	228533	403024	0	0	0	0	0	0	0	0	0	0	0	0	0	0	0	312657	0	324137	228533
Q3TXS7_T270	Psmd1	sp|Q3TXS7|PSMD1_MOUSE	Q3TXS7	tVGTPIASVPGSTNTGTVPGSEK	0.8368	0	0.135	0.1951	0	0	0	0	0	0.1303	0	0	0	0	0	0	0	0.4316	0	0.4842	0	242011	358451	179048	0	0	0	0	0	156970	0	0	0	0	0	0	0	304394	459714	293367	0	242011	358451	179048	0
Q3U5C8_S231	Arhgef16	sp|Q3U5C8|ARHGG_MOUSE	Q3U5C8	GLNtsHESDDDILDEPSGPVGTQR	0.7639	0.4468	0.6454	0.4875	0.543	0.5721	0	0	0	0	0	0	0	0	0	0	0	0	0	0.4	0	350217	416945	402397	0	388451	62241.5	181819	0	0	0	0	0	0	0	0	0	266097	0	233253	118707	350217	416945	402397	0
Q3U5C8_S234	Arhgef16	sp|Q3U5C8|ARHGG_MOUSE	Q3U5C8	GLNTSHEsDDDILDEPSGPVGTQR;GLNTSHEsDDDILDEPsGPVGTQR	0.8375	0	0	0.7558	0	0	0	0	0	0	0	0	0	0	0	0	0	0	0	0	0	0	0	591989	0	0	0	0	0	0	0	0	0	0	0	0	0	0	0	0	0	0	0	591989	0
Q3U5C8_S243	Arhgef16	sp|Q3U5C8|ARHGG_MOUSE	Q3U5C8	GLNTSHEsDDDILDEPsGPVGTQR	0.7558	0	0	0.7558	0	0	0	0	0	0	0	0	0	0	0	0	0	0	0	0	0	0	0	591989	0	0	0	0	0	0	0	0	0	0	0	0	0	0	0	0	0	0	0	591989	0
Q3U5C8_T230	Arhgef16	sp|Q3U5C8|ARHGG_MOUSE	Q3U5C8	GLNtsHESDDDILDEPSGPVGTQR	0.7639	0.4468	0.6454	0.4875	0.543	0.5721	0	0	0	0	0	0	0	0	0	0	0	0	0	0.4	0	350217	416945	402397	0	388451	62241.5	181819	0	0	0	0	0	0	0	0	0	266097	0	233253	118707	350217	416945	402397	0
Q3UDE2_S5	Ttll12	sp|Q3UDE2|TTL12_MOUSE	Q3UDE2	MEIQsGPQPGSPGR	0.9383	0.5	0	0	0	0.5	0	0	0	0	0	0	0	0	0	0	0	0	0	0	0	131957	0	0	0	0	0	0	0	0	0	0	0	0	0	0	0	0	0	0	0	131957	0	0	0
Q3UGC7_S16	Eif3j1	sp|Q3UGC7|EI3JA_MOUSE	Q3UGC7	AAAAAAAAAAGDSDsWDADTFSMEDPVRK	0.9172	0	0	0	0.2983	0.9172	0	0	0	0	0	0	0	0	0	0	0	0	0	0	0	0	0	0	0	706300	0	0	0	0	0	0	0	0	0	0	0	0	0	0	0	0	0	0	0
Q3UGC7_T112	Eif3j1	sp|Q3UGC7|EI3JA_MOUSE	Q3UGC7	VLtPEEQLADK	1	1	1	1	1	1	0	0	0	0	0	0	0	0	0	0	0	0	1	0	0	518682	584759	746067	577655	581242	158798	81004.5	0	80610.4	156051	0	0	0	0	0	205279	260147	382412	180665	250017	518682	584759	746067	577655
Q3UH66_S107	Wnk2	sp|Q3UH66|WNK2_MOUSE	Q3UH66	GRPAAPAPAAPAAPPGsPSVPSDPGPER	0.9146	0	0.3333	0.6877	0.3333	0.3333	0.437	0.4846	0.8982	0.4892	0.479	0	0.3333	0	0	0	0.3333	0.4825	0.8485	0.887	0.3333	0	89332.7	410580	831814	620799	1.02046e+06	881174	1168613	859188	926060	0	0	0	0	0	1.27144e+06	1.63575e+06	1.06255e+06	1.51682e+06	1.23081e+06	0	98705.2	220965	453311
Q3UH66_S109	Wnk2	sp|Q3UH66|WNK2_MOUSE	Q3UH66	GRPAAPAPAAPAAPPGSPsVPSDPGPER	0.9075	0	0	0	0	0	0	0	0	0	0	0	0	0	0	0	0.4789	0	0	0	0	0	0	0	0	0	0	0	0	0	0	0	0	0	0	0	681171	0	0	0	0	0	0	0	0
Q3UH66_S112	Wnk2	sp|Q3UH66|WNK2_MOUSE	Q3UH66	GRPAAPAPAAPAAPPGSPSVPsDPGPER	0.8201	0	0	0	0	0	0	0	0.5877	0	0	0	0	0	0	0	0	0.7828	0.7675	0	0	0	0	0	0	0	0	0	582267	0	0	0	0	0	0	0	0	813984	1.06255e+06	0	0	0	0	0	0
Q3UH66_S1652	Wnk2	sp|Q3UH66|WNK2_MOUSE	Q3UH66	EALAAPMQsGPGSFTVGSPAQLR	0.7688	0.7431	0.3777	0	0.25	0	0.25	0	0	0	0	0	0	0	0	0	0	0	0	0.7688	0	195914	0	0	0	0	240890	0	0	233841	0	0	0	0	0	0	0	349924	0	371322	0	195914	0	0	0
Q3UH66_S1661	Wnk2	sp|Q3UH66|WNK2_MOUSE	Q3UH66	EALAAPMQSGPGSFTVGsPAQLR	0.9209	0	0	0	0.8776	0.8991	0	0	0.8766	0	0	0	0	0	0	0	0	0	0	0	0	0	0	0	0	422714	0	242703	240319	0	332954	0	0	0	0	0	0	0	423430	0	0	0	0	0	0
Q3UH66_S1797	Wnk2	sp|Q3UH66|WNK2_MOUSE	Q3UH66	AGsLGPETPSR	0.9061	0	0	0	0	0.3333	0	0	0	0	0	0	0	0	0	0	0	0	0	0	0	0	138103	0	215391	200836	0	0	0	0	0	0	0	0	0	0	0	0	0	0	0	0	138103	0	215391
Q3UH66_S45	Wnk2	sp|Q3UH66|WNK2_MOUSE	Q3UH66	sVVESDQEEPPGLEAAETPSAQPPQPLQR	0.8809	0	0	0.3028	0.8809	0.458	0.2989	0	0	0.3931	0.25	0	0	0	0.7994	0	0	0	0	0	0	0	0	354209	591531	809127	152235	223693	175040	213925	202752	457409	886491	0	291492	0	0	260941	382323	273080	222710	0	0	363042	352632
Q3UHQ6_S1167	Dop1b	sp|Q3UHQ6|DOP1B_MOUSE	Q3UHQ6	AALLAAFQPEsPR	1	1	1	1	0	1	1	1	1	1	1	1	0	0	0	0	0	1	1	0	0	0	0	130152	0	0	0	267757	255774	261402	235019	411822	0	461593	0	182541	141272	298584	403086	344966	360786	0	0	130152	0
Q3UJB0_S414	Sf3b2	sp|Q3UJB0|SF3B2_MOUSE	Q3UJB0	GFEEEHKDsDDDssDDEQEK	1	0	0	0	0	0	0	0	0	0	0	0	0	0	0	0	0	0	0	0	0	0	153808	0	0	0	0	0	0	0	0	0	0	0	0	0	0	0	0	0	0	0	153808	0	0
Q3UJB0_S418	Sf3b2	sp|Q3UJB0|SF3B2_MOUSE	Q3UJB0	GFEEEHKDsDDDssDDEQEK	1	0	0	0	0	0	0	0	0	0	0	0	0	0	0	0	0	0	0	0	0	0	153808	0	0	0	0	0	0	0	0	0	0	0	0	0	0	0	0	0	0	0	153808	0	0
Q3UJB0_S419	Sf3b2	sp|Q3UJB0|SF3B2_MOUSE	Q3UJB0	GFEEEHKDsDDDssDDEQEK	1	0	0	0	0	0	0	0	0	0	0	0	0	0	0	0	0	0	0	0	0	0	153808	0	0	0	0	0	0	0	0	0	0	0	0	0	0	0	0	0	0	0	153808	0	0
Q3UJB9_S738	Edc4	sp|Q3UJB9|EDC4_MOUSE	Q3UJB9	TRSPDVIsSASTALSQDIPEIASEALSR	0.8143	0	0	0	0	0	0.2389	0	0	0	0	0	0	0	0	0	0	0	0	0	0	0	0	0	0	0	900918	0	0	0	0	0	0	0	0	0	0	0	0	0	0	0	0	0	0
Q3UJB9_S876	Edc4	sp|Q3UJB9|EDC4_MOUSE	Q3UJB9	DsQDTSAEQSDHDDEVASLASASGGFGSK	0.8882	0	0	0	0	0	0.2778	0	0	0.2801	0	0	0.125	0.1505	0.1279	0	0	0	0	0	0.125	0	0	0	0	0	208037	224437	366644	302960	0	0	539159	742458	383316	210202	208968	146231	0	130266	287535	0	0	0	0
Q3UJU9_S46	Rmdn3	sp|Q3UJU9|RMD3_MOUSE	Q3UJU9	SHsLPNSLDYAQASER	0.8734	0	0	0	0.234	0	0	0	0	0	0	0	0	0	0	0.8734	0	0	0	0	0	0	0	0	588104	0	0	0	0	0	0	0	0	0	0	310265	0	0	0	0	0	0	0	0	588104
Q3UKC1_S632	Tax1bp1	sp|Q3UKC1|TAXB1_MOUSE	Q3UKC1	LEGQsPQQVSR	0.9369	0.5	0.9157	0.8875	0.9335	0.5	0	0	0	0.5	0	0	0	0	0	0	0	0	0.8375	0	0	0	472956	327481	288940	0	0	0	0	0	0	0	0	0	0	0	0	0	0	0	0	0	472956	327481	288940
Q3UMF0_S1028	Cobll1	sp|Q3UMF0|COBL1_MOUSE	Q3UMF0	ADDDIIQKPAETsPPPVAPK	0.8771	0	0	0	0	0	0	0	0	0	0	0	0	0	0	0	0	0	0	0	0.6378	0	0	0	0	0	0	321543	143730	218008	0	0	0	0	0	0	229993	0	0	0	217114	0	0	0	0
Q3UMF0_S993	Cobll1	sp|Q3UMF0|COBL1_MOUSE	Q3UMF0	EVQRDPQLsPEQHPSSLSER	0.9152	0.9107	0	0.9152	0	0.4586	0	0	0.25	0	0	0	0	0	0	0	0	0	0	0	0	201803	157836	482593	220808	316665	206945	178484	136012	170478	269120	0	0	0	0	0	233090	425835	0	275541	312390	201803	157836	482593	220808
Q3UMF0_S999	Cobll1	sp|Q3UMF0|COBL1_MOUSE	Q3UMF0	EVQRDPQLSPEQHPsSLSER	0.7644	0	0	0	0	0	0	0	0	0	0	0	0	0	0	0	0	0	0	0	0	0	0	0	119307	0	0	0	0	0	0	0	0	0	0	0	0	0	0	0	0	0	0	0	119307
Q3UPL0_S520	Sec31a	sp|Q3UPL0|SC31A_MOUSE	Q3UPL0	DsDQVAQsDGEESPAAEEQLLGER	0.8979	0	0	0	0	0.8748	0	0	0	0	0	0	0	0	0	0	0	0	0	0	0	213249	268683	0	0	304634	0	0	0	0	0	0	0	0	0	0	0	0	0	0	0	213249	268683	0	0
Q3UPL0_S526	Sec31a	sp|Q3UPL0|SC31A_MOUSE	Q3UPL0	DSDQVAQsDGEESPAAEEQLLGER;DSDQVAQsDGEEsPAAEEQLLGER;DsDQVAQsDGEESPAAEEQLLGER	0.9036	0	0	0.8284	0.3735	0.8748	0.4797	0.4515	0	0	0	0	0	0	0	0.4341	0	0	0	0	0	213249	268683	0	186098	304634	206284	260690	0	0	0	0	0	0	0	204556	0	0	0	0	0	213249	268683	0	186098
Q3UQ44_S16	Iqgap2	sp|Q3UQ44|IQGA2_MOUSE	Q3UQ44	YGsIVDDER	0.8551	0.6604	0	0	0	0	0	0	0	0	0	0	0	0	0	0	0	0	0	0	0	58035.8	0	0	0	0	0	0	0	0	0	0	0	0	0	0	0	0	0	0	0	58035.8	0	0	0
Q3UTJ2_S339	Sorbs2	sp|Q3UTJ2|SRBS2_MOUSE	Q3UTJ2	sEPAVGPLR	1	0	0	0	0	0	0	0	0	0	0	0	0	0	0	0	0	0	0	0	0	68020.3	111744	0	38374.2	0	0	0	0	0	0	0	0	0	0	0	0	0	0	0	0	68020.3	111744	0	38374.2
Q3UVL4_S18	Vps51	sp|Q3UVL4|VPS51_MOUSE	Q3UVL4	AAAAAVGPGLGSGPGDsPEGPEADAPER;AAAAAVGPGLGSGPGDsPEGPEADAPERR;AAAAAVGPGLGsGPGDsPEGPEADAPERR	1	0	0	0	0	0.8613	0	0	0	0	0	0	0	0	0	0	0	0.5266	0	0.7824	0	0	0	0	0	0	0	0	0	0	0	0	0	0	0	0	0	270606	0	282529	0	0	0	0	0
Q3UYC0_S220	Ppm1h	sp|Q3UYC0|PPM1H_MOUSE	Q3UYC0	GGVGAPGsPSTPPTR	0.9207	0	0.25	0	0	0.3292	0.25	0.9207	0	0	0.25	0	0	0	0	0	0.25	0.25	0.25	0.25	0.25	111837	134170	120722	90458.9	77458.1	276807	316970	361545	300992	230424	0	217562	0	0	97825.5	311485	288006	509481	296493	360848	111837	134170	120722	90458.9
Q4VAA2_T205	Cdv3	sp|Q4VAA2|CDV3_MOUSE	Q4VAA2	tPQGPPEIYSDTQFPSLQSTAK	0.7761	0.2971	0.1429	0.1429	0	0.2462	0.1429	0	0	0	0	0	0	0	0	0	0	0	0	0	0	447518	0	0	179418	296735	0	0	0	0	0	0	0	0	0	0	0	0	0	0	0	447518	0	0	179418
Q505F5_S430	Lrrc47	sp|Q505F5|LRC47_MOUSE	Q505F5	RQsVSGLHR	0.9349	0	0	0	0.5	0.5	0	0.5	0.5	0.5	0.5	0.5	0.5	0.5	0.5	0	0.9207	0	0.6493	0.9349	0.5	147593	192876	216143	136890	196552	202997	292403	368251	249163	250396	0	225282	130706	78381.1	0	267862	430222	373791	479056	654718	147593	192876	216143	136890
Q505K2_S739	Fhip1a	sp|Q505K2|FHI1A_MOUSE	Q505K2	LQPEAQSLPTSNGPLsSPDPETESQPSR	0.8758	0.1956	0	0.4573	0	0	0	0	0	0	0	0	0	0	0	0	0	0	0	0	0	489388	0	709123	0	0	0	0	0	0	0	0	0	0	0	0	0	0	0	0	0	489388	0	709123	0
Q505K2_S750	Fhip1a	sp|Q505K2|FHI1A_MOUSE	Q505K2	LQPEAQSLPTSNGPLSSPDPETESQPsR	0.7681	0	0	0.7681	0	0	0	0	0	0	0	0	0	0	0	0	0	0	0	0	0	0	0	709123	0	0	0	0	0	0	0	0	0	0	0	0	0	0	0	0	0	0	0	709123	0
Q52KI8_S220	Srrm1	sp|Q52KI8|SRRM1_MOUSE	Q52KI8	EKsPELPEPSVR	0.9371	0	0	0	0	0.8879	0	0	0	0	0	0	0	0	0	0	0	0	0	0	0	0	0	0	21118.8	85932.3	0	0	0	0	0	0	0	0	0	0	0	0	0	0	0	0	0	0	22528
Q52KI8_S227	Srrm1	sp|Q52KI8|SRRM1_MOUSE	Q52KI8	EKSPELPEPsVR	0.9379	0	0	0	0	0.8749	0	0	0	0	0	0	0	0	0	0	0	0	0	0	0	96060.7	38870.5	92329.3	53096.3	85932.3	0	0	0	0	0	0	0	0	0	0	0	0	0	0	0	118256	47851.6	113662	65364.2
Q52KI8_S387	Srrm1	sp|Q52KI8|SRRM1_MOUSE	Q52KI8	RLsPsAsPPR	1	0	1	0	0	0	0	0	0	0	0	0	0	0	0	0	0	0	0	0	0	0	139554	0	0	48130.2	0	0	0	0	0	0	0	0	0	0	0	0	0	0	0	0	139554	0	0
Q52KI8_S389	Srrm1	sp|Q52KI8|SRRM1_MOUSE	Q52KI8	RLsPsAsPPR	1	0	1	0	0	0	0	0	0	0	0	0	0	0	0	0	0	0	0	0	0	0	139554	0	0	48130.2	0	0	0	0	0	0	0	0	0	0	0	0	0	0	0	0	139554	0	0
Q52KI8_S391	Srrm1	sp|Q52KI8|SRRM1_MOUSE	Q52KI8	RLsPsAsPPR	1	0	1	0	0	0	0	0	0	0	0	0	0	0	0	0	0	0	0	0	0	0	139554	0	0	48130.2	0	0	0	0	0	0	0	0	0	0	0	0	0	0	0	0	139554	0	0
Q569Z6_S253	Thrap3	sp|Q569Z6|TR150_MOUSE	Q569Z6	sPLQSVVVR	0.9406	0.5	0	0	0.5	0.5	0	0	0.5	0.5771	0	0	0	0	0	0	0	0	0	0	0.5	157016	264204	165883	86147.2	193503	0	84810.9	134554	110157	96016.9	0	0	136651	81339.2	0	106176	162880	0	163338	124105	157016	264204	165883	86147.2
Q569Z6_S679	Thrap3	sp|Q569Z6|TR150_MOUSE	Q569Z6	IDIsPSTFR	0.9353	0	0	0	0	0	0	0	0	0	0	0	0	0	0	0	0	0	0	0	0	0	0	0	0	122678	0	0	0	0	0	147836	65802.3	200977	91661	86917.4	84132.3	116061	63293	105137	0	0	0	0	0
Q5DU31_S292	Ipcef1	sp|Q5DU31|ICEF1_MOUSE	Q5DU31	sLEQASLSPLGDR	0.9068	0	0	0	0.4627	0.3392	0	0	0	0	0	0	0	0	0	0	0	0.3333	0	0	0	332961	218318	0	0	378064	0	0	0	0	0	0	0	0	0	0	155083	301558	313226	221536	0	332961	218318	0	0
Q5FWK3_T56	Arhgap1	sp|Q5FWK3|RHG01_MOUSE	Q5FWK3	SSSPEPVtHLK	0.9097	0	0	0	0.8472	0.9097	0	0	0	0	0	0	0	0	0	0	0	0	0	0	0	0	0	0	355008	387431	0	0	0	0	0	0	0	0	0	0	0	0	0	0	0	0	0	0	355008
Q5HZI1_S1143	Mtus1	sp|Q5HZI1|MTUS1_MOUSE	Q5HZI1	QLsTEQAALQESLEK	0.8512	0.8512	0.4877	0.4561	0.4904	0.3333	0	0	0	0	0	0	0	0	0	0	0	0	0	0	0	241894	445117	0	465554	504244	0	0	0	0	0	0	0	0	0	0	0	0	0	0	0	241894	445117	0	465554
Q5HZI1_S232	Mtus1	sp|Q5HZI1|MTUS1_MOUSE	Q5HZI1	ENFENLQATPsK	0.807	0	0	0	0	0.807	0	0	0	0	0	0	0	0	0	0	0	0	0	0	0	0	0	0	0	415412	0	0	0	0	0	0	0	0	0	0	0	0	0	0	0	0	0	0	0
Q5HZI1_S539	Mtus1	sp|Q5HZI1|MTUS1_MOUSE	Q5HZI1	DTPSPQVTGGSSPSPGPsK	0.9302	0	0.7006	0	0.9302	0	0	0.8177	0	0	0	0	0	0	0	0	0	0	0	0	0	0	475612	0	582238	0	0	0	0	0	0	0	0	0	0	0	0	0	0	0	0	0	475612	0	582238
Q5HZI1_T230	Mtus1	sp|Q5HZI1|MTUS1_MOUSE	Q5HZI1	ENFENLQAtPSK	0.9252	0.5	0.5	0.5	0.5	0.5	0	0.5	0.5	0.5	0.5	0	0	0	0	0	0.5	0.5	0.5	0.9084	0.5	0	549132	393288	310375	516441	237151	215500	328459	197621	0	0	159493	0	0	0	249845	454129	353081	304032	251078	0	549132	393288	310375
Q5SF07_S153	Igf2bp2	sp|Q5SF07|IF2B2_MOUSE	Q5SF07	IsYIPDEEVSSPSPPHR;IsyIPDEEVSSPSPPHR	0.8202	0.7919	0.4	0.4	0.4	0.2469	0.8202	0.4083	0.2396	0.7919	0.4933	0	0	0	0	0	0.2	0.4	0.4	0.4149	0.4668	2391405	1.41102e+06	1.97518e+06	1.57269e+06	541842	941313	694264	942938	518053	804060	271798	75046.4	0	171402	0	1.71006e+06	2.50102e+06	1.27137e+06	1.98948e+06	2252573	1.32882e+06	627885	765979	1.6349e+06
Q5SF07_S161	Igf2bp2	sp|Q5SF07|IF2B2_MOUSE	Q5SF07	ISYIPDEEVsSPSPPHR;ISYIPDEEVssPSPPHR	0.9355	0.8415	0.6454	0.9355	0.6119	0.6402	0.4373	0.7336	0.3158	0.6026	0.4577	0.2688	0	0	0.8509	0	0.319	0.619	0.5457	0.7676	0.4276	2.20977e+06	1.41893e+06	1.99149e+06	1.73009e+06	1.19831e+06	1.21617e+06	1.1407e+06	1.11381e+06	1.37102e+06	737983	571587	0	0	325129	0	873782	2.12029e+06	1.61117e+06	2.24779e+06	1.18406e+06	1.17231e+06	639202	777648	495289
Q5SF07_S162	Igf2bp2	sp|Q5SF07|IF2B2_MOUSE	Q5SF07	ISYIPDEEVSsPSPPHR;ISYIPDEEVSsPsPPHR;ISYIPDEEVssPSPPHR	0.9355	0.5547	0.5861	0.9355	0.826	0.6402	0	0.5491	0	0	0	0	0	0	0	0	0	0.797	0.5457	0.7676	0	1.6013e+06	2.26789e+06	1.68259e+06	3.00528e+06	996645	0	345478	253251	282274	0	0	0	0	0	0	0	1.31248e+06	667428	900602	0	1.6013e+06	1.14623e+06	1.68259e+06	1.54649e+06
Q5SF07_S164	Igf2bp2	sp|Q5SF07|IF2B2_MOUSE	Q5SF07	ISYIPDEEVSSPsPPHR;ISYIPDEEVSsPsPPHR;ISyIPDEEVSSPsPPHR	0.9191	0	0.4804	0.8408	0.9175	0	0	0	0	0	0	0.913	0.8268	0.8058	0	0	0.8327	0.797	0.7988	0.7064	0.9191	0	1.13394e+06	180791	1.87054e+06	201666	0	0	0	0	0	571587	714357	596452	0	0	1.54262e+06	2389150	1411653	1.34719e+06	1.18406e+06	0	1.22149e+06	189837	822221
Q5SF07_Y154	Igf2bp2	sp|Q5SF07|IF2B2_MOUSE	Q5SF07	ISyIPDEEVSSPsPPHR;IsyIPDEEVSSPSPPHR	0.8447	0.7919	0.4	0.4	0.4	0	0.8202	0	0	0	0.4933	0	0	0	0	0	0.8447	0.4	0.4	0.4149	0.4	1.6013e+06	1.13394e+06	1.68259e+06	1.57269e+06	0	286170	345478	0	0	329499	0	134342	0	0	0	1.33767e+06	712171	667428	743310	673254	1.6013e+06	1.13394e+06	1.68259e+06	1.57269e+06
Q5SRX1_T473	Tom1l2	sp|Q5SRX1|TM1L2_MOUSE	Q5SRX1	AAEtVPDLPSPPTEAPAPASNTSTR	0.9119	0.1429	0	0.2503	0.1429	0.1773	0	0	0	0	0	0	0	0	0	0	0	0	0	0.1429	0	154570	415384	420178	200944	375061	0	0	0	61247.4	0	0	0	0	0	0	208658	192078	0	186929	0	157141	239847	241501	204286
Q5SSL4_S64	Abr	sp|Q5SSL4|ABR_MOUSE	Q5SSL4	sQGGGDSVSPTPPEGLAPGVEAGK	0.809	0.25	0.25	0.3099	0.25	0.809	0	0	0	0	0.25	0	0	0	0	0	0.25	0.25	0	0.2943	0.3251	353789	347167	435220	522594	381459	141277	0	0	166034	157975	0	0	0	0	0	322520	424793	0	291427	333239	353789	347167	435220	522594
Q5SVR0_S464	Tbc1d9b	sp|Q5SVR0|TBC9B_MOUSE	Q5SVR0	NsPMEDLGAK	1	0	0	0	0	0	0	0	0	0	0	0	0	0	0	0	0	0	0	0	0	0	90491.5	0	0	0	0	0	0	0	0	0	0	0	0	0	0	0	0	0	0	0	90491.5	0	0
Q5XFR0_S271	Pabpn1l	sp|Q5XFR0|EPAB2_MOUSE	Q5XFR0	GHGGAPQWFsPY	0.9294	0.5	0.5	0.5	0.5	0.5	0	0	0	0	0	0	0	0	0	0	0	0	0	0	0	140397	189767	258411	290610	194531	0	0	0	0	0	0	0	0	0	0	0	0	0	0	0	140397	189767	258411	290610
Q5XFR0_S76	Pabpn1l	sp|Q5XFR0|EPAB2_MOUSE	Q5XFR0	sPVFNQELEAIK	1	1	1	1	1	1	0	0	0	0	0	0	0	0	0	0	0	0	0	0	0	710979	585484	1.07648e+06	1.2463e+06	1.30384e+06	0	0	0	0	0	0	0	0	0	0	0	171957	0	166922	0	448927	579961	670762	786850
Q60520_S10	Sin3a	sp|Q60520|SIN3A_MOUSE	Q60520	LDDQEsPVYAAQQR	0.9388	0.5	0.9194	0.5	0.5	0.9388	0	0	0	0	0	0	0	0	0	0	0	0	0	0	0	0	0	0	0	303708	0	0	0	0	0	0	0	0	0	0	0	0	0	0	0	0	0	0	0
Q60520_S861	Sin3a	sp|Q60520|SIN3A_MOUSE	Q60520	HNGVGGsPPK	1	0	0	0	0	1	0	0	0	0	0	0	0	0	0	0	0	0	0	0	0	102271	146578	0	82352.1	104006	0	0	0	0	0	0	0	0	0	0	0	0	0	0	0	102271	146578	0	82352.1
Q60520_S941	Sin3a	sp|Q60520|SIN3A_MOUSE	Q60520	DKSDsPAIQLR;SDsPAIQLR	0.9056	0	0	0.8848	0	0	0	0	0	0	0	0	0	0	0	0	0	0	0	0	0	0	0	300787	0	0	0	0	0	0	0	0	0	0	0	0	0	0	0	0	0	0	0	234140	0
Q60864_S481	Stip1	sp|Q60864|STIP1_MOUSE	Q60864	HDsPEDVK	1	1	1	1	1	1	0	0	0	0	0	0	0	0	0	0	0	0	0	0	0	755059	1.28407e+06	1.20643e+06	792519	811649	0	0	0	0	0	0	0	0	0	0	0	0	76383.5	0	0	755059	1.28407e+06	1.20643e+06	792519
Q60899_S221	Elavl2	sp|Q60899|ELAV2_MOUSE	Q60899	TNQAILSQLYQsPNR	0.9218	0	0	0	0	0	0.6097	0	0	0	0	0	0	0	0	0	0	0	0	0.9218	0	0	0	0	0	0	604349	0	772754	624799	714372	0	0	0	0	0	0	0	0	759432	0	0	0	0	0
Q60899_T210	Elavl2	sp|Q60899|ELAV2_MOUSE	Q60899	tNQAILSQLYQSPNR	0.8426	0.25	0	0.25	0.25	0.5688	0	0	0	0	0	0	0	0	0	0	0.25	0.3836	0	0.8426	0.25	313528	0	0	492812	375882	0	0	0	0	0	0	0	0	0	0	652317	856858	0	759432	1.18655e+06	313528	0	0	492812
Q60902_S229	Eps15l1	sp|Q60902|EP15R_MOUSE	Q60902	TVFAGAVPVLPAsPPPK	0.9377	0	0	0	0	0.9238	0	0	0	0	0	0	0	0.909	0	0	0	0	0	0.8761	0	0	0	0	0	183827	0	0	0	247194	0	0	0	256239	0	0	0	259444	0	289279	0	0	0	0	0
Q60902_T217	Eps15l1	sp|Q60902|EP15R_MOUSE	Q60902	tVFAGAVPVLPASPPPK	0.8931	0	0	0	0	0.5	0	0.5	0	0	0.5	0.7195	0	0.6894	0	0.5	0	0.5	0.8906	0	0	0	0	0	0	183827	0	229564	0	0	0	392527	0	520733	280674	179117	0	259444	0	289279	0	0	0	0	0
Q60949_T466	Tbc1d1	sp|Q60949|TBCD1_MOUSE	Q60949	QtLQVAAENIGSDLPPSASR	0.7635	0	0	0	0	0	0	0	0	0	0	0	0.7635	0	0	0	0	0	0	0	0	0	0	0	0	0	0	0	0	0	0	3167997	2558599	1.17195e+06	0	0	0	0	0	0	0	0	0	0	0
Q61136_S518	Prp4k	sp|Q61136|PRP4K_MOUSE	Q61136	VEQEsssDDNLEDFDVEEEDEEALIEQR	1	0	1	0	0	0	0	0	0	0	0	0	0	0	0	0	0	0	0	0	0	0	150640	0	0	0	0	0	0	0	0	0	0	0	0	0	0	0	0	0	0	0	150640	0	0
Q61136_S519	Prp4k	sp|Q61136|PRP4K_MOUSE	Q61136	VEQEsssDDNLEDFDVEEEDEEALIEQR	1	0	1	0	0	0	0	0	0	0	0	0	0	0	0	0	0	0	0	0	0	0	150640	0	0	0	0	0	0	0	0	0	0	0	0	0	0	0	0	0	0	0	150640	0	0
Q61136_S520	Prp4k	sp|Q61136|PRP4K_MOUSE	Q61136	VEQEsssDDNLEDFDVEEEDEEALIEQR	1	0	1	0	0	0	0	0	0	0	0	0	0	0	0	0	0	0	0	0	0	0	150640	0	0	0	0	0	0	0	0	0	0	0	0	0	0	0	0	0	0	0	150640	0	0
Q61140_S143	Bcar1	sp|Q61140|BCAR1_MOUSE	Q61140	TQQGLYQAPGPNPQFQsPPAK	0.8533	0	0.6401	0	0	0.8533	0	0	0	0	0	0	0	0	0	0	0	0	0	0	0	0	237100	166154	207807	150863	0	0	0	0	0	0	0	0	0	0	0	0	0	0	0	0	237100	166154	207807
Q61142_S124	Spin1	sp|Q61142|SPIN1_MOUSE	Q61142	IsDAHLADTMIGK	0.941	0.8532	0.938	0.9358	0.9251	0.9362	0	0.5	0	0	0.9001	0	0	0	0	0	0	0	0.8764	0	0	2474028	2393938	2.4275e+06	2416506	5378805	0	0	422702	304601	383559	0	0	0	0	0	479545	0	400541	0	0	1.0477e+06	938357	988726	674576
Q61142_S196	Spin1	sp|Q61142|SPIN1_MOUSE	Q61142	IMPDsNDSPPAER;IMPDsNDSPPAEREPGEVVDSLVGK	0.9336	0.5	0.795	0.8768	0.921	0.8004	0.5	0.5	0.4682	0	0.5	0	0	0	0	0	0.5	0.8869	0.5	0.6597	0.5	26183734	15083980	16768764	39791844	47877920	3.16492e+06	2.10042e+06	2274410	0	2.74704e+06	0	0	539284	0	258239	5150633	8.11523e+06	4071979	10505157	7635954	20537694	7.04603e+06	10948170	12916029
Q61142_S199	Spin1	sp|Q61142|SPIN1_MOUSE	Q61142	IMPDSNDsPPAER;IMPDSNDsPPAEREPGEVVDSLVGK	0.9392	0.9101	0.4675	0.8641	0.9226	0.9276	0.7298	0	0	0.8346	0.7168	0	0	0	0	0	0.8428	0.8312	0	0.9086	0.6106	24320182	14190686	18656390	33775992	41119052	2.68685e+06	0	218343	285122	680566	0	329609	0	299954	0	4.24922e+06	8224015	0	10095585	7429880	13043558	10422541	3.24887e+06	11487973
Q61142_S212	Spin1	sp|Q61142|SPIN1_MOUSE	Q61142	IMPDSNDSPPAEREPGEVVDsLVGK	0.9387	0.9076	0.8483	0.9291	0.8415	0.893	0.8392	0	0	0.7854	0.9208	0	0	0	0	0	0.8951	0.9168	0.8564	0.8541	0.9096	14024294	14190686	32146276	21569600	55342420	2.68685e+06	0	0	365894	1.84854e+06	1.68199e+06	0	0	321384	363917	4535108	7.54091e+06	6456163	10133727	7429880	9726143	9591612	18822806	4.59155e+06
Q61142_T131	Spin1	sp|Q61142|SPIN1_MOUSE	Q61142	ISDAHLADtMIGK;VATSRISDAHLADtMIGK	0.9334	0.5186	0.5978	0.6565	0.5536	0.5539	0	0	0	0	0.744	0	0	0	0	0	0	0	0	0	0	769398	895748	651517	1120673	1.14236e+06	0	0	0	0	0	0	0	0	0	0	0	0	0	0	0	797922	895748	377608	1.16222e+06
Q61152_T299	Ptpn18	sp|Q61152|PTN18_MOUSE	Q61152	TLQDtSPHYQNLK	0.8471	0	0	0	0	0.3165	0	0	0	0	0	0	0	0	0	0	0	0	0	0	0	289977	272795	0	0	0	0	0	0	0	0	0	0	0	0	0	0	0	0	0	0	289977	272795	0	0
Q61233_S257	Lcp1	sp|Q61233|PLSL_MOUSE	Q61233	EGEsLEDLMK	1	0	1	0	0	0	1	1	1	1	0	1	1	0	0	1	1	1	1	1	1	93956.6	0	0	0	0	216749	256213	0	176460	0	381235	263013	536767	189049	0	189846	315514	213157	316413	256993	109700	0	0	0
Q61233_S5	Lcp1	sp|Q61233|PLSL_MOUSE	Q61233	GsVSDEEMMELR	0.9406	0.9328	0.9382	0.8354	0.9389	0.9406	0.9386	0.9386	0.5	0.5	0.8512	0	0	0	0	0.5	0.9054	0.9376	0.5	0.9299	0.5	2483858	2.2846e+06	2.44413e+06	2788606	2448460	1.284e+06	1727217	1.64392e+06	1.94416e+06	931005	528211	496248	249568	0	347600	2545761	4028267	1.57529e+06	2869702	1.84051e+06	786084	671005	822795	546714
Q61233_S7	Lcp1	sp|Q61233|PLSL_MOUSE	Q61233	GSVsDEEMMELR	0.8999	0	0.8529	0.6505	0	0	0	0	0	0	0	0	0	0	0	0	0	0	0.6476	0	0	0	514634	948728	0	0	0	0	0	0	0	0	0	0	0	0	0	0	1.21215e+06	0	0	0	514634	948728	0
Q61316_T531	Hspa4	sp|Q61316|HSP74_MOUSE	Q61316	MQVDQEEPHtEEQQQQPQTPAENK	0.7886	0.5347	0.5	0.5315	0.5	0	0	0	0	0.5	0	0	0	0	0	0	0.5	0.7789	0.5	0.5	0	766417	880488	849344	700836	362764	0	0	449367	571140	0	0	0	0	0	0	990459	964898	1.05678e+06	967701	0	595231	996460	659636	793146
Q61316_T540	Hspa4	sp|Q61316|HSP74_MOUSE	Q61316	MQVDQEEPHTEEQQQQPQtPAENK	0.9283	0.9151	0.885	0.9195	0.8727	0.8956	0	0	0	0	0.582	0	0	0	0	0	0	0.6924	0	0	0.7951	1.15421e+06	1725079	1.65146e+06	2176165	1.77814e+06	520844	0	0	0	0	0	0	0	0	0	0	964898	0	967701	899871	1.2471e+06	942795	879222	904022
Q61655_S84	Ddx19a	sp|Q61655|DD19A_MOUSE	Q61655	DPsSPLYSVK	0.7701	0.25	0.25	0.25	0.25	0.4818	0	0	0	0	0	0	0	0	0	0	0	0.25	0	0	0	355695	438547	385466	416139	388028	0	0	0	0	42636.3	0	0	0	0	0	156575	195333	140071	0	0	355695	438547	385466	416139
Q61655_S89	Ddx19a	sp|Q61655|DD19A_MOUSE	Q61655	DPSSPLYsVK	0.8863	0	0	0	0.8863	0	0	0	0	0	0	0	0	0	0	0	0	0	0	0	0	0	0	0	416139	0	0	0	0	0	0	0	0	0	0	0	0	0	0	0	0	0	0	0	0
Q61687_T583	Atrx	sp|Q61687|ATRX_MOUSE	Q61687	LtPVSLSNSPIK	0.7536	0	0	0	0	0.7536	0	0	0	0	0	0	0	0	0	0	0	0	0	0	0	49471.9	0	0	59232.8	144645	0	0	0	0	0	0	0	0	0	0	0	0	0	0	0	49471.9	0	0	59232.8
Q61699_S537	Hsph1	sp|Q61699|HS105_MOUSE	Q61699	NIQQDNsEAGTQPQVQTDGQQTSQSPPSPELTSEESK;NIQQDNsEAGtQPQVQTDGQQTSQSPPSPELTSEESK	0.8576	0.2703	0	0.1106	0.4307	0.1953	0	0	0.106	0	0	0	0	0	0	0	0	0	0.4003	0	0	3.55217e+06	0	2.91412e+06	2.92813e+06	4.10694e+06	0	0	587432	0	0	0	0	479046	0	0	0	0	2.04817e+06	0	0	3.55217e+06	0	2.91412e+06	2.92813e+06
Q61699_S553	Hsph1	sp|Q61699|HS105_MOUSE	Q61699	NIQQDNSEAGTQPQVQTDGQQTsQSPPSPELTSEESK;NIQQDNSEAGTQPQVQTDGQQTsQSPPSPELTSEESKTPDADK	0.9001	0.2622	0.1412	0	0	0	0	0	0	0	0	0	0	0	0	0	0	0	0	0	0	3.55217e+06	2.92813e+06	0	0	0	0	0	0	0	0	0	0	0	0	0	0	0	0	0	0	3.55217e+06	2.92813e+06	0	0
Q61699_S558	Hsph1	sp|Q61699|HS105_MOUSE	Q61699	NIQQDNSEAGTQPQVQTDGQQTSQSPPsPELTSEESK	0.9214	0.9146	0.76	0.9127	0.8465	0.9214	0	0	0	0.2256	0	0	0	0	0	0	0.4838	0.891	0.2857	0.2245	0.3062	8484974	1.64266e+06	8020998	5479253	6978518	0	0	0	1.44371e+06	0	0	0	0	0	0	6482205	2.74229e+06	4746413	3.16102e+06	797520	4.73149e+06	1.14854e+06	3.61094e+06	3.64271e+06
Q61699_S563	Hsph1	sp|Q61699|HS105_MOUSE	Q61699	NIQQDNSEAGTQPQVQTDGQQTSQSPPSPELtsEESKTPDADK	0.838	0.3727	0	0	0	0	0	0	0	0	0	0	0	0	0	0	0	0	0	0	0	3617413	0	0	0	0	0	0	0	0	0	0	0	0	0	0	0	0	0	0	0	3617413	0	0	0
Q61699_S566	Hsph1	sp|Q61699|HS105_MOUSE	Q61699	NIQQDNSEAGTQPQVQTDGQQTSQSPPSPELTSEEsK	0.8719	0	0	0	0	0	0	0	0	0	0	0	0	0	0	0	0	0	0	0	0	0	0	0	1.42391e+06	0	0	0	0	0	0	0	0	0	0	0	0	0	0	0	0	0	0	0	2.14659e+06
Q61699_S810	Hsph1	sp|Q61699|HS105_MOUSE	Q61699	IEsPKLER	1	1	1	1	0	1	1	1	1	1	1	0	1	0	0	0	0	1	1	1	1	999312	1.3121e+06	905055	1.39877e+06	1.44806e+06	1.23976e+06	1.88379e+06	1.74408e+06	1711684	2.02011e+06	0	0	545663	336537	0	1.84194e+06	2.39104e+06	2192532	2237274	1.90425e+06	999312	1.3121e+06	905055	1.13081e+06
Q61699_T547	Hsph1	sp|Q61699|HS105_MOUSE	Q61699	NIQQDNSEAGTQPQVQtDGQQTSQSPPSPELTSEESK	0.8609	0	0.7355	0	0	0	0	0	0	0	0	0	0	0	0	0	0	0	0	0	0	0	5541233	0	0	0	0	0	0	0	0	0	0	0	0	0	0	0	0	2.95893e+06	0	0	5541233	0	0
Q61699_T562	Hsph1	sp|Q61699|HS105_MOUSE	Q61699	NIQQDNSEAGTQPQVQTDGQQTSQSPPSPELtsEESKTPDADK	0.8439	0.3727	0	0	0	0	0	0	0	0	0	0	0	0	0	0	0	0	0	0	0	3617413	0	0	0	0	0	0	0	0	0	0	0	0	0	0	0	0	0	0	0	3617413	0	0	0
Q61699_T816	Hsph1	sp|Q61699|HS105_MOUSE	Q61699	tPNGPNIDK	1	0	1	0	0	0	0	0	0	0	0	0	0	0	0	0	0	0	0	0	0	138331	146309	0	105497	98227.6	0	0	0	0	0	0	0	0	0	0	0	0	0	0	0	138331	146309	0	105497
Q61990_S183	Pcbp2	sp|Q61990|PCBP2_MOUSE	Q61990	PsSSPVIFAGGQDR	0.9002	0.3333	0.3333	0.3333	0.3333	0.3333	0.3333	0.3333	0.9002	0	0.8557	0	0	0	0	0	0.3333	0.3333	0.3333	0.3333	0.4111	1233105	1.31628e+06	1.44035e+06	1.14989e+06	1.15994e+06	0	713825	602428	0	721612	0	0	0	0	0	970685	1672554	1.58928e+06	1.71908e+06	1.09446e+06	1233105	1.31628e+06	1.44035e+06	1.14989e+06
Q61990_S185	Pcbp2	sp|Q61990|PCBP2_MOUSE	Q61990	PSSsPVIFAGGQDR	0.8834	0.8055	0.7716	0	0	0	0	0	0	0	0	0	0	0	0	0	0	0	0	0	0	1233105	1.31628e+06	0	0	0	0	0	0	0	0	0	0	0	0	0	0	0	0	0	0	1233105	1.31628e+06	0	0
Q62101_S241	Prkd1	sp|Q62101|KPCD1_MOUSE	Q62101	sPSESFIGR	0.9319	0.3333	0.6637	0.879	0.4847	0.3333	0.3333	0.3333	0	0	0.9169	0	0	0	0	0	0.3333	0.3333	0.4882	0.3333	0.3333	171422	379901	183326	131579	211507	142025	180685	162579	0	0	0	0	0	0	64716.9	203163	245886	165947	207938	184344	171422	379901	183326	131579
Q62167_S594	Ddx3x	sp|Q62167|DDX3X_MOUSE	Q62167	FsGGFGAR	1	1	0	0	0	0	0	0	0	0	0	0	0	0	0	0	0	0	0	0	0	65971.2	109682	97372.3	0	92969.9	0	0	0	0	0	0	0	0	0	0	0	0	0	0	0	65971.2	109682	97372.3	0
Q62318_S23	Trim28	sp|Q62318|TIF1B_MOUSE	Q62318	AASAAATAAASAATAASAASGsPGSGEGSAGGEK	0.8122	0	0	0	0.3117	0	0	0	0	0	0	0	0	0	0	0	0	0	0	0	0	698198	2.50775e+06	0	714668	0	0	0	0	0	0	0	0	0	0	0	0	0	0	0	0	698198	2.50775e+06	0	714668
Q62318_S473	Trim28	sp|Q62318|TIF1B_MOUSE	Q62318	sGEGEVSGLLR	0.9409	0	0.5	0.674	0	0.9407	0	0	0	0	0	0	0	0	0	0	0	0	0	0	0	0	183315	182988	0	299350	0	0	0	0	0	0	0	0	0	0	0	0	0	0	0	0	183315	182988	0
Q62318_S479	Trim28	sp|Q62318|TIF1B_MOUSE	Q62318	SGEGEVsGLLR;SRSGEGEVsGLLR	0.863	0	0	0.6271	0	0	0	0	0	0	0	0	0	0	0	0	0	0	0	0	0	127050	0	182988	143752	0	0	0	0	0	0	0	0	0	0	0	0	0	0	0	0	127050	0	182988	143752
Q62393_S170	Tpd52	sp|Q62393|TPD52_MOUSE	Q62393	KLEDVKNsPTFK	0.8476	0	0	0	0.5	0.8476	0	0	0	0	0	0	0	0	0	0	0	0	0	0.5	0	148664	0	231280	236811	198003	199644	0	146770	192825	146601	0	0	0	0	0	240199	267110	170416	283349	233171	148664	0	231280	236811
Q62393_S203	Tpd52	sp|Q62393|TPD52_MOUSE	Q62393	PAGGDFGEVLNsTANATSTMTTEPPPEQMTESP	0.8226	0.309	0	0.138	0.1623	0.7211	0.4655	0.3834	0.3617	0	0.142	0	0.1111	0	0	0	0.2978	0.1111	0.1111	0.3778	0.4592	3.18977e+06	0	2772701	1.54698e+06	3504789	2.67166e+06	1.75393e+06	2.61599e+06	0	1.96002e+06	0	0	0	0	0	1.5494e+06	5732471	6.90746e+06	6.66864e+06	4374209	2.20931e+06	0	1.90743e+06	1.06761e+06
Q62393_S223	Tpd52	sp|Q62393|TPD52_MOUSE	Q62393	PAGGDFGEVLNSTANATSTMTTEPPPEQMTEsP	0.894	0	0	0.8804	0.7709	0	0.839	0	0.152	0	0.8629	0	0	0	0	0	0	0.5992	0	0	0.319	128901	0	1.69226e+06	724084	0	2.13187e+06	0	1.88746e+06	0	657848	0	0	0	354786	215691	0	6.55289e+06	0	0	1.22265e+06	94259.2	0	1.23747e+06	0
Q62393_S30	Tpd52	sp|Q62393|TPD52_MOUSE	Q62393	NyLyLsPSGNTSPPGSPTQNVGLLK	0.8939	0.375	0.5459	0.375	0.8939	0.629	0	0	0	0	0	0	0	0	0	0	0	0	0	0	0	1.38959e+06	903461	950331	2.09173e+06	926206	0	0	0	0	0	0	0	0	0	0	0	0	0	0	0	1.38959e+06	903461	950331	2.09173e+06
Q62393_S36	Tpd52	sp|Q62393|TPD52_MOUSE	Q62393	NYLYLSPSGNTsPPGSPTQNVGLLK;NYLYLSPSGNtsPPGsPTQNVGLLK	0.8697	0	0	0	0	0	0	0	0	0	0	0	0	0	0	0	0	0	0	0	0	0	853215	0	0	0	0	0	0	0	0	0	0	0	0	0	0	0	0	0	0	0	853215	0	0
Q62393_S40	Tpd52	sp|Q62393|TPD52_MOUSE	Q62393	NYLYLSPSGNTSPPGsPtQNVGLLK;NYLYLSPSGNtsPPGsPTQNVGLLK	0.8292	0	0	0	0.5031	0	0	0	0	0	0	0	0	0	0	0	0	0	0	0	0	0	853215	0	0	0	0	0	0	0	0	0	0	0	0	0	0	0	0	0	0	0	853215	0	0
Q62393_T204	Tpd52	sp|Q62393|TPD52_MOUSE	Q62393	PAGGDFGEVLNStANATSTMTTEPPPEQMTESP	0.8923	0	0	0	0.8923	0	0	0	0	0	0	0	0	0	0	0	0	0	0	0	0	0	0	0	724084	0	0	0	0	0	0	0	0	0	0	0	0	0	0	0	0	0	0	0	0
Q62393_T208	Tpd52	sp|Q62393|TPD52_MOUSE	Q62393	PAGGDFGEVLNSTANAtSTMTTEPPPEQMTESP	0.7617	0.1788	0	0	0.7617	0	0	0	0	0	0	0	0	0	0	0	0	0	0	0	0	403714	0	0	99789	44022.2	0	0	0	0	0	0	0	0	0	0	0	0	0	0	0	403714	0	0	99789
Q62393_T212	Tpd52	sp|Q62393|TPD52_MOUSE	Q62393	PAGGDFGEVLNSTANATSTMtTEPPPEQMTESP	0.8275	0	0.8275	0	0	0	0	0	0	0	0	0	0	0	0	0	0	0	0	0	0	0	1.19691e+06	0	0	0	0	0	0	0	0	0	0	0	0	0	0	0	0	0	0	0	1.19691e+06	0	0
Q62393_T221	Tpd52	sp|Q62393|TPD52_MOUSE	Q62393	PAGGDFGEVLNSTANATSTMTTEPPPEQMtESP	0.9028	0.6392	0.4463	0.8331	0.4734	0.9028	0.456	0.4732	0.1738	0.4691	0.2741	0	0	0	0	0.4377	0.4428	0.3875	0.4762	0.8836	0.438	3.18977e+06	1.19691e+06	4112260	4653082	5110176	2.13187e+06	663060	1.88746e+06	2.75442e+06	1.96002e+06	0	1.15326e+06	0	637418	450226	5233334	5751442	6.90746e+06	6.66864e+06	5596857	2.46909e+06	1307022	1.80582e+06	1.23522e+06
Q62393_T35	Tpd52	sp|Q62393|TPD52_MOUSE	Q62393	NYLYLSPSGNtsPPGsPTQNVGLLK	0.8292	0	0	0	0	0	0	0	0	0	0	0	0	0	0	0	0	0	0	0	0	0	853215	0	0	0	0	0	0	0	0	0	0	0	0	0	0	0	0	0	0	0	853215	0	0
Q62393_Y26	Tpd52	sp|Q62393|TPD52_MOUSE	Q62393	NyLyLSPSGNTSPPGSPTQNVGLLK;NyLyLsPSGNTSPPGSPTQNVGLLK	0.8975	0.7437	0.5459	0.375	0.8939	0.629	0.4499	0.8975	0.25	0.25	0.3838	0.25	0	0.3316	0.3231	0	0.25	0	0.25	0	0.3799	1.38959e+06	903461	950331	2.09173e+06	926206	243377	530855	510120	537084	531678	697228	981614	619314	677788	454253	296378	301582	0	0	0	1.38959e+06	903461	950331	2.09173e+06
Q62393_Y28	Tpd52	sp|Q62393|TPD52_MOUSE	Q62393	NyLyLSPSGNTSPPGSPTQNVGLLK;NyLyLsPSGNTSPPGSPTQNVGLLK	0.8975	0.7437	0.5459	0.375	0.8939	0.629	0.4499	0.8975	0.25	0.25	0.3838	0.25	0	0.3316	0.3231	0	0.25	0	0.25	0	0.3799	1.38959e+06	903461	950331	2.09173e+06	926206	243377	530855	510120	537084	531678	697228	981614	619314	677788	454253	296378	301582	0	0	0	1.38959e+06	903461	950331	2.09173e+06
Q62417_S185	Sorbs1	sp|Q62417|SRBS1_MOUSE	Q62417	AGEQDPVPTPAELTsPGR	0.9073	0	0	0	0.9073	0	0	0	0	0	0	0	0	0	0	0	0	0	0	0	0	0	0	0	254795	0	0	0	0	0	0	0	0	0	0	0	0	0	0	0	0	0	0	0	0
Q62417_S261	Sorbs1	sp|Q62417|SRBS1_MOUSE	Q62417	sPLSVPR	0.9349	0	0	0	0	0	0	0	0	0	0	0	0	0	0	0	0.5	0	0	0	0	0	117440	0	57760.2	0	0	0	0	0	0	0	0	0	0	0	0	0	0	0	0	0	117440	0	57760.2
Q62417_S96	Sorbs1	sp|Q62417|SRBS1_MOUSE	Q62417	LSSSADTNGNAQPsPLAAK	0.9266	0	0.3452	0	0.9266	0	0	0	0	0	0	0	0	0	0	0	0	0	0	0	0	0	518299	0	406222	0	0	0	0	0	0	0	0	0	0	0	0	0	0	0	0	0	518299	0	406222
Q62417_T179	Sorbs1	sp|Q62417|SRBS1_MOUSE	Q62417	AGEQDPVPtPAELTSPGR	0.8582	0.3333	0.3333	0.3333	0.3333	0.4745	0.3333	0	0	0.3333	0	0	0	0	0	0	0	0.3333	0	0.3333	0.3333	249015	181635	265403	254795	194816	0	0	147068	0	188515	0	0	0	0	0	0	0	0	0	242686	249015	181635	265403	254795
Q62448_T505	Eif4g2	sp|Q62448|IF4G2_MOUSE	Q62448	tQTPPLGQTPQLGLK	0.8884	0.587	0	0.4708	0.4904	0.4889	0	0.3333	0	0	0.3333	0	0	0	0	0	0.3333	0	0	0	0.7925	400361	304358	373831	324673	349892	0	0	0	260421	0	0	0	0	0	0	523222	0	0	373098	500849	400361	304358	373831	324673
Q62448_T513	Eif4g2	sp|Q62448|IF4G2_MOUSE	Q62448	TQTPPLGQtPQLGLK	0.7773	0	0	0.7773	0	0	0	0	0	0	0	0	0	0	0	0	0	0	0	0.7127	0	0	0	295121	0	0	0	0	0	0	0	0	0	0	0	0	0	0	0	271098	500849	0	0	295121	0
Q63844_T199	Mapk3	sp|Q63844|MK03_MOUSE	Q63844	IADPEHDHtGFLtEYVATR	0.7677	0.5	0	0.5218	0.5	0.5204	0	0	0	0	0.5255	0	0	0	0	0	0.6005	0.5	0	0.5	0	375612	441149	564198	586550	544381	290715	291140	256532	295736	444235	0	0	0	0	0	725638	601952	411443	666894	501338	375612	441149	564198	586550
Q63844_T203	Mapk3	sp|Q63844|MK03_MOUSE	Q63844	IADPEHDHtGFLtEYVATR	0.7677	0.5	0	0.4927	0.5	0.4932	0	0	0	0	0.4915	0	0	0	0	0	0.6005	0.5	0	0.5	0	375612	441149	564198	586550	544381	290715	291140	256532	295736	444235	0	0	0	0	0	725638	601952	411443	666894	501338	375612	441149	564198	586550
Q63ZW7_S524	Patj	sp|Q63ZW7|INADL_MOUSE	Q63ZW7	VPGsPENELK	1	1	1	1	0	0	0	0	1	0	0	0	0	0	0	0	0	0	0	0	0	129067	253571	153435	138468	203672	153519	157280	160319	148989	156679	0	224708	0	138468	0	179699	204998	204149	171928	172153	129067	253571	153435	138468
Q64327_S103	Mea1	sp|Q64327|MEA1_MOUSE	Q64327	IQALGLHLPDPPLEsEDEDEEGAAALSSHSSIPMDPEHVELVK	0.8289	0	0	0	0	0	0	0.7726	0	0	0.2	0	0	0	0	0.6102	0	0	0	0	0	0	0	0	0	0	608907	896370	0	0	878938	0	0	1.26287e+06	659817	934905	0	0	0	0	0	0	0	0	0
Q66JT0_S71	Wee2	sp|Q66JT0|WEE2_MOUSE	Q66JT0	DKEsPGPDLWK	1	1	1	1	1	1	0	0	0	0	0	0	0	0	0	0	0	0	0	0	0	227879	293137	349677	264976	439129	0	0	0	0	0	0	0	0	0	0	0	0	0	0	0	227879	293137	349677	264976
Q66JT0_T517	Wee2	sp|Q66JT0|WEE2_MOUSE	Q66JT0	HIQtPQR	1	0	0	1	0	0	0	0	0	0	0	0	0	0	0	0	0	0	0	0	0	111696	174193	336023	138169	211545	0	0	0	0	0	0	0	0	0	0	0	0	0	0	0	111696	174193	336023	138169
Q68FL4_S109	Ahcyl2	sp|Q68FL4|SAHH3_MOUSE	Q68FL4	DGGEALVsPDGTVTEAPR	0.9341	0.3333	0	0.3333	0.9307	0.3333	0	0	0	0	0	0	0	0	0	0	0	0	0	0	0.6601	376612	0	312496	0	0	0	0	0	0	0	0	0	0	0	0	0	0	0	0	0	376612	0	312496	0
Q69ZR2_T1503	Hectd1	sp|Q69ZR2|HECD1_MOUSE	Q69ZR2	APGESSAISMGIVSVSSPDVSSVSELtNK	0.8771	0	0	0	0	0.8771	0	0	0	0	0	0	0	0	0	0	0	0	0	0	0	0	0	0	0	343741	0	0	0	0	0	0	0	0	0	0	0	0	0	0	0	0	0	0	0
Q6A0A2_S404	Larp4b	sp|Q6A0A2|LAR4B_MOUSE	Q6A0A2	PATSPLTsLR	0.8148	0	0	0	0	0	0	0.8148	0	0	0	0	0	0	0	0	0	0	0	0	0	0	0	0	0	0	0	220948	165490	0	0	0	0	0	0	0	0	0	0	0	0	0	0	0	0
Q6A0A2_S486	Larp4b	sp|Q6A0A2|LAR4B_MOUSE	Q6A0A2	VEPSsLESSPGLGR	0.8295	0	0	0	0	0	0	0	0	0	0	0	0.3191	0	0	0	0	0.311	0	0	0	0	0	0	0	0	0	0	0	0	0	370682	332720	493421	0	0	0	320256	0	0	0	0	0	0	0
Q6A0A2_S490	Larp4b	sp|Q6A0A2|LAR4B_MOUSE	Q6A0A2	VEPSSLESsPGLGR	0.8941	0	0	0	0	0.8941	0	0	0	0	0	0	0	0	0	0	0	0	0	0	0	217656	271276	214003	0	171084	0	0	0	0	0	0	0	0	0	0	0	0	0	0	0	217656	271276	214003	0
Q6A0A2_S664	Larp4b	sp|Q6A0A2|LAR4B_MOUSE	Q6A0A2	DPsSSSPLQPPK	0.7807	0.25	0.25	0.3997	0.25	0.25	0.25	0.25	0.3229	0.25	0.25	0	0	0	0	0	0.25	0.25	0.25	0.25	0.25	204135	326816	232781	272240	236346	462069	347510	459909	463243	440803	228868	0	249729	166620	194440	432703	528895	501663	372211	526423	204135	326816	232781	272240
Q6A0A2_S667	Larp4b	sp|Q6A0A2|LAR4B_MOUSE	Q6A0A2	DPSSSsPLQPPK	0.8761	0	0	0	0	0.7955	0	0	0	0	0	0	0	0	0	0	0	0	0	0	0.8761	0	0	0	0	236346	0	0	0	0	0	0	0	0	0	0	0	0	0	0	526423	0	0	0	0
Q6A0A2_S721	Larp4b	sp|Q6A0A2|LAR4B_MOUSE	Q6A0A2	RAsPPAAGK	1	0	0	0	1	0	0	0	0	0	0	0	0	0	0	0	0	0	0	0	0	0	0	0	101269	0	0	0	0	0	0	0	0	0	0	0	0	0	0	0	0	0	0	0	101269
Q6A4J8_S19	Usp7	sp|Q6A4J8|UBP7_MOUSE	Q6A4J8	AGEQQLsEPEDMEMEAGDTDDPPR	0.9213	0	0.8339	0	0.5	0	0.5	0.5	0	0.8996	0	0	0.5166	0	0	0	0	0.5	0.5	0	0.8168	0	100656	117353	178475	316971	204570	0	133246	198405	0	491691	311184	462603	0	224461	0	286412	180092	67897.3	104905	0	134685	157027	238813
Q6B966_S13	Nlrp14	sp|Q6B966|NAL14_MOUSE	Q6B966	TEDDEMEYEAsKEETVSEDK;TEDDEMEYEAsKEETVSEDKDFDDGIDYR	0.8972	0	0.2974	0	0	0	0	0	0	0	0	0	0	0	0.2917	0.2997	0	0.2997	0	0	0	0	997706	0	154429	0	0	0	0	265540	0	523667	0	0	1481617	518040	0	0	0	0	0	0	997706	0	154429
Q6B966_S19	Nlrp14	sp|Q6B966|NAL14_MOUSE	Q6B966	EEtVsEDK;EEtVsEDKDFDDGIDYR;TEDDEMEYEASKEETVsEDK	1	0.9161	0.6412	0	0.9197	0.7277	0	0.8716	0	0.8345	0	0	0	0	0	0	0	0	0.7585	0	0.8533	3497658	1256598	678969	505297	533594	0	3.61885e+06	0	617277	238053	0	0	0	0	0	0	0	1.24747e+06	0	896587	857559	658844	1217194	483986
Q6B966_T17	Nlrp14	sp|Q6B966|NAL14_MOUSE	Q6B966	EEtVsEDK;EEtVsEDKDFDDGIDYR;TEDDEMEYEASKEEtVSEDK	1	0	0	0.4071	0.9197	0.3688	0	0	0	0	0	0	0	0	0	0	0	0	0	0	0	0	1.56298e+06	1.65152e+06	463194	822726	0	0	0	0	0	0	0	0	0	0	0	0	0	0	0	0	1.56298e+06	1.65152e+06	351617
Q6B966_T3	Nlrp14	sp|Q6B966|NAL14_MOUSE	Q6B966	MKtEDDEMEYEASK;tEDDEMEYEASK;tEDDEMEYEASKEETVSEDK;tEDDEMEYEASKEETVSEDKDFDDGIDYR	0.9115	0.8302	0.3333	0.3333	0.3252	0	0	0	0	0	0	0	0	0	0	0	0	0	0	0	0	951658	839261	1.65152e+06	2.2717e+06	0	0	0	0	0	0	0	0	0	0	0	0	0	0	0	0	951658	839261	1.65152e+06	2.2717e+06
Q6B966_Y10	Nlrp14	sp|Q6B966|NAL14_MOUSE	Q6B966	TEDDEMEyEASKEETVSEDK	0.8639	0.3387	0.2479	0.2484	0.3263	0.2439	0.3069	0.8418	0.2379	0	0.2276	0	0	0	0	0	0	0.2402	0	0.544	0.2481	2.23599e+06	1.20088e+06	1.43334e+06	1.95509e+06	1.64863e+06	1.75086e+06	1.86382e+06	2.15139e+06	0	1.41999e+06	0	0	0	0	0	0	2.66251e+06	0	2.04435e+06	1.85649e+06	1.15391e+06	740786	1.51537e+06	689309
Q6B966_Y30	Nlrp14	sp|Q6B966|NAL14_MOUSE	Q6B966	EETVSEDKDFDDGIDyR;TEDDEMEYEASKEETVSEDKDFDDGIDyR	0.8422	0.8422	0	0	0	0	0	0	0.5978	0	0	0	0	0	0	0.7091	0	0	0	0.6191	0	106979	0	0	0	115385	0	0	533535	0	173940	583813	0	0	0	919630	0	0	523974	355330	0	178629	0	0	0
Q6NZC7_S600	Sec23ip	sp|Q6NZC7|S23IP_MOUSE	Q6NZC7	sPGSVAVSNGVIK	0.8157	0	0.3333	0.447	0.3333	0.3333	0	0	0	0	0	0	0	0	0	0	0	0	0	0	0	94857.6	247784	237475	161471	131847	0	0	0	0	0	0	0	0	0	0	0	0	0	0	0	94857.6	247784	237475	161471
Q6NZJ6_S1211	Eif4g1	sp|Q6NZJ6|IF4G1_MOUSE	Q6NZJ6	AAsLTEDR	0.9414	0.5	0.5	0.6621	0.9373	0	0	0	0	0	0	0	0	0	0	0	0	0	0	0	0	0	764831	0	252394	548499	0	0	0	0	0	0	0	0	0	0	0	0	0	0	0	0	764831	0	252394
Q6NZJ6_S1231	Eif4g1	sp|Q6NZJ6|IF4G1_MOUSE	Q6NZJ6	EATLPPVsPPK;REATLPPVsPPK	0.9399	0	0	0	0	0.6641	0	0	0	0	0	0	0	0	0	0	0	0	0	0	0	0	0	0	0	113524	0	0	0	0	0	0	0	0	0	0	0	0	0	0	0	0	0	0	0
Q6NZJ6_S357	Eif4g1	sp|Q6NZJ6|IF4G1_MOUSE	Q6NZJ6	PIPESEFSSSPLQVsTALVPHK	0.8808	0	0	0	0.4532	0.3101	0	0	0	0.2049	0	0	0	0	0	0	0	0	0.4396	0	0	0	0	0	128113	230739	0	0	0	149574	0	0	0	0	0	0	0	0	0	0	0	0	0	0	128113
Q6NZJ6_T1226	Eif4g1	sp|Q6NZJ6|IF4G1_MOUSE	Q6NZJ6	EAtLPPVSPPK	0.846	0	0	0	0	0	0	0	0	0	0	0	0	0	0	0	0.5	0	0	0	0	0	0	0	0	0	0	0	0	0	415847	0	0	0	0	0	383791	0	356400	393604	0	0	0	0	0
Q6NZR5_S253	Skic2	sp|Q6NZR5|SKI2_MOUSE	Q6NZR5	ASsLEDLVLK	0.9283	0	0	0	0	0	0	0	0	0	0	0	0	0	0	0	0	0.5972	0	0	0	0	0	0	0	0	0	0	0	0	0	0	0	0	0	0	0	189499	0	0	192538	0	0	0	0
Q6P1G2_S26	Kdm2b	sp|Q6P1G2|KDM2B_MOUSE	Q6P1G2	QRYDENEDLsDVEEIVSVR;YDENEDLsDVEEIVSVR	0.9313	0.4476	0	0	0.7949	0	0	0	0	0	0	0	0	0	0	0	0.3855	0	0.4231	0.7289	0	0	0	0	174688	80170	0	0	127378	223610	0	0	0	0	0	0	414185	104335	610912	367658	229212	0	0	0	212911
Q6P1G2_S566	Kdm2b	sp|Q6P1G2|KDM2B_MOUSE	Q6P1G2	LGPAsAVK	1	0	0	0	0	0	0	0	0	0	0	0	0	0	0	0	0	0	0	0	0	159681	239530	134101	117642	163261	0	0	0	0	0	0	0	0	0	0	0	0	0	0	0	159681	239530	134101	117642
Q6P1G2_S885	Kdm2b	sp|Q6P1G2|KDM2B_MOUSE	Q6P1G2	sSSPTAGPSTEGAEGPEEK	0.8366	0.2472	0.3269	0.2467	0.2468	0.1667	0.1667	0.2303	0.2437	0.2442	0.1667	0	0.2271	0	0.1667	0.2145	0.2175	0.2622	0.2471	0.3179	0.1667	593072	634287	566239	457110	537879	0	0	0	0	0	0	0	0	0	0	0	0	0	361072	0	593072	634287	566239	457110
Q6P1G2_S942	Kdm2b	sp|Q6P1G2|KDM2B_MOUSE	Q6P1G2	TESTLAHEsQQPIKsEPESENDEPK	0.8351	0	0	0	0.5848	0.6914	0.8351	0	0	0	0	0	0	0	0	0	0	0	0	0	0	0	0	0	1.27248e+06	1.0404e+06	716711	0	0	0	0	0	0	0	0	0	0	0	921632	0	0	0	0	0	1.27248e+06
Q6P1G2_S948	Kdm2b	sp|Q6P1G2|KDM2B_MOUSE	Q6P1G2	TESTLAHESQQPIKsEPEsENDEPK;TESTLAHEsQQPIKsEPESENDEPK	0.9327	0.8859	0.7482	0.9129	0.8589	0.6914	0.8351	0.8502	0.917	0.8019	0.8217	0	0	0	0.7756	0.3457	0.8964	0.7339	0.8381	0.9187	0	1327918	1.5485e+06	1.52222e+06	2784272	1.34433e+06	1.43342e+06	708049	908266	816949	711957	608497	1275371	807888	525273	557160	1.10119e+06	1.31829e+06	1.4697e+06	1.1924e+06	1.23261e+06	1.28371e+06	1.10283e+06	1.47154e+06	1.06812e+06
Q6P1G2_S952	Kdm2b	sp|Q6P1G2|KDM2B_MOUSE	Q6P1G2	TESTLAHESQQPIKsEPEsENDEPK	0.9327	0.8894	0.7482	0.9129	0.8589	0	0.5075	0.8519	0.917	0.8019	0.8217	0	0	0	0.7839	0.3457	0.8964	0.7339	0.8381	0.9187	0	1327918	1.5485e+06	1.52222e+06	1.51179e+06	303925	716711	708049	908266	816949	711957	608497	1275371	807888	525273	557160	1.10119e+06	1.31829e+06	548070	1.1924e+06	1.23261e+06	1.17801e+06	1.01441e+06	1.35038e+06	970402
Q6P1G2_S997	Kdm2b	sp|Q6P1G2|KDM2B_MOUSE	Q6P1G2	VMsRPPPSASPPK	0.8621	0	0	0	0.3333	0.7685	0	0	0	0	0	0	0	0	0	0	0	0	0	0	0	0	320280	268024	307846	895686	0	0	0	0	0	0	0	0	0	0	0	0	0	0	0	0	202565	170262	172358
Q6P1G2_Y19	Kdm2b	sp|Q6P1G2|KDM2B_MOUSE	Q6P1G2	QRyDENEDLSDVEEIVSVR;yDENEDLSDVEEIVSVR	0.9172	0	0	0.5212	0.3333	0.4567	0	0	0	0.4665	0.651	0	0	0	0	0	0	0	0.3714	0.7389	0	0	0	0	0	0	0	0	50224	0	0	0	0	0	0	0	0	0	0	420924	0	0	0	0	0
Q6P1H6_S535	Ankle2	sp|Q6P1H6|ANKL2_MOUSE	Q6P1H6	AFVGPLsPSK	0.7909	0	0.5	0.5	0	0.5	0.6337	0.5	0.5	0	0.5	0	0	0	0	0	0	0.7909	0.5	0.5	0.6488	78129.6	110814	91106.9	0	113511	143708	172614	158409	147342	156141	0	0	0	0	0	77707.5	194190	184951	190649	189857	78129.6	110814	91106.9	0
Q6P542_S103	Abcf1	sp|Q6P542|ABCF1_MOUSE	Q6P542	QLsVPASDEEDEVPAPIPR	0.7761	0.5	0	0.5	0.5	0.5	0.5	0.5	0.5	0.5	0.5	0.5	0	0.5	0.5	0	0.5622	0	0	0.5	0.5	289524	0	261184	399916	499512	250331	349716	257179	258757	399916	0	0	684455	384012	0	417889	0	0	486983	635706	289524	0	261184	399916
Q6P542_S107	Abcf1	sp|Q6P542|ABCF1_MOUSE	Q6P542	QLSVPAsDEEDEVPAPIPR	0.9371	0	0	0	0.846	0	0	0	0	0	0	0	0	0	0.7895	0.887	0	0	0	0.9006	0.6468	0	0	0	399916	0	0	0	0	0	0	0	581373	0	384012	376101	0	487943	457670	486983	635706	0	0	0	399916
Q6P542_T21	Abcf1	sp|Q6P542|ABCF1_MOUSE	Q6P542	QQPPEPEWIGDGEGtSPADK	0.7844	0	0	0	0.5	0.7844	0	0	0	0	0	0	0	0	0	0	0	0	0	0	0	107808	178702	130252	0	193379	0	0	0	0	0	0	0	0	0	0	0	0	0	0	0	107808	178702	130252	0
Q6P9Q6_S1091	Fkbp15	sp|Q6P9Q6|FKB15_MOUSE	Q6P9Q6	RLsLtPDPEK	1	0	1	0	0	0	0	0	0	0	0	0	0	0	0	0	0	0	0	0	0	0	110486	117220	93138.6	0	0	0	0	0	0	0	0	0	0	0	0	0	0	0	0	0	110486	117220	93138.6
Q6P9Q6_T1093	Fkbp15	sp|Q6P9Q6|FKB15_MOUSE	Q6P9Q6	RLsLtPDPEK	1	0	1	0	0	0	0	0	0	0	0	0	0	0	0	0	0	0	0	0	0	0	110486	117220	93138.6	0	0	0	0	0	0	0	0	0	0	0	0	0	0	0	0	0	110486	117220	93138.6
Q6PCP5_T89	Mff	sp|Q6PCP5|MFF_MOUSE	Q6PCP5	PLALKtPPR	1	0	0	0	0	1	1	1	0	0	1	0	0	0	0	0	0	0	0	0	1	70723.1	0	58351.5	68953.7	83904.1	157063	122593	127454	157835	126159	0	144268	0	100838	72435.2	89704	0	0	124524	90537.3	70855	0	58460.3	69082.3
Q6PFD9_S673	Nup98	sp|Q6PFD9|NUP98_MOUSE	Q6PFD9	PIPQTPEsVGNK	0.7805	0.7805	0.7171	0	0	0	0	0	0	0	0	0	0	0	0	0	0	0	0	0	0	486280	473427	0	0	0	0	0	0	0	0	0	0	0	0	0	0	0	0	0	0	486280	473427	0	0
Q6PFD9_T670	Nup98	sp|Q6PFD9|NUP98_MOUSE	Q6PFD9	PIPQtPESVGNK	0.9336	0.6155	0.881	0.5	0.5	0.9106	0	0	0.8981	0	0	0	0	0	0	0	0	0	0	0	0	753520	753079	608471	557976	672469	226452	0	138854	0	0	0	0	0	0	0	400538	369194	282300	335619	175453	437446	440355	338714	291675
Q6PGH2_S16	Jpt2	sp|Q6PGH2|JUPI2_MOUSE	Q6PGH2	sMKPPGGESSDLFGSPEEGISSSK	0.7862	0.1912	0.243	0.1429	0.2449	0.2416	0	0.1429	0	0.2447	0	0	0	0	0	0	0.1654	0.2409	0	0	0.2207	823132	469600	726375	480570	908564	0	310813	0	237154	0	0	0	0	0	0	476354	449974	0	0	480569	823132	469600	726375	480570
Q6PGH2_S30	Jpt2	sp|Q6PGH2|JUPI2_MOUSE	Q6PGH2	SMKPPGGESSDLFGsPEEGISSSK	0.9108	0.2369	0.7655	0.2448	0.8866	0.2213	0	0	0	0	0.2427	0	0	0	0	0	0	0.2419	0	0.2199	0	1202349	824502	680575	862894	908564	0	0	0	0	275504	0	0	0	0	0	0	449974	0	659581	0	771903	483195	735602	499265
Q6PGH2_S69	Jpt2	sp|Q6PGH2|JUPI2_MOUSE	Q6PGH2	GsGIFDESTPVQTR	0.9292	0.25	0.6216	0.25	0.262	0	0	0.25	0.25	0.25	0.7277	0	0	0	0	0	0.25	0.2591	0.7966	0.9292	0.25	2.39045e+06	1.66901e+06	2.26378e+06	1.55886e+06	0	0	1.00056e+06	1427690	1.23382e+06	633727	0	0	0	0	0	1.71575e+06	2333441	2.22546e+06	1.04597e+06	1.64094e+06	2.39045e+06	1.66901e+06	2.26378e+06	1.55886e+06
Q6PGH2_S75	Jpt2	sp|Q6PGH2|JUPI2_MOUSE	Q6PGH2	GSGIFDEsTPVQTR	0.879	0.3296	0.3304	0.4751	0.4783	0.3302	0.4853	0.3299	0	0.879	0	0	0	0	0	0	0.33	0	0	0.4821	0.4029	2.39045e+06	1.66901e+06	2.26378e+06	1.55886e+06	2.79257e+06	671446	1.00056e+06	0	1.23382e+06	0	0	0	0	0	0	1.71575e+06	0	0	1.04597e+06	1.64094e+06	2.39045e+06	1.66901e+06	2.26378e+06	1.55886e+06
Q6PGH2_S97	Jpt2	sp|Q6PGH2|JUPI2_MOUSE	Q6PGH2	TSDIFGsPVTATAPLAHPNK;TSDIFGsPVTATAPLAHPNKPK	0.9332	0.9152	0	0.3137	0.3279	0.9309	0.3208	0.7031	0.3264	0	0.7813	0	0	0	0	0	0.8623	0.4817	0.8063	0.702	0.7046	1.67333e+06	0	757035	3.43743e+06	2.18449e+06	1.94229e+06	1.83851e+06	486084	0	1766143	0	0	0	0	0	3.17021e+06	2.45723e+06	1.54162e+06	835132	2.73975e+06	997063	0	1.66549e+06	2.00707e+06
Q6PGH2_T100	Jpt2	sp|Q6PGH2|JUPI2_MOUSE	Q6PGH2	TSDIFGSPVtATAPLAHPNKPK	0.9136	0.6064	0	0.415	0	0.4578	0	0.4503	0	0.4244	0	0	0	0	0	0	0	0.4693	0.6297	0	0.7948	850682	0	1239916	0	1.36481e+06	0	1.50867e+06	0	947508	0	0	0	0	200669	0	0	2.45723e+06	1.04694e+06	0	1.59994e+06	850682	0	1239916	0
Q6PGH2_T102	Jpt2	sp|Q6PGH2|JUPI2_MOUSE	Q6PGH2	TSDIFGSPVTAtAPLAHPNKPK	0.9108	0	0.5345	0	0.9087	0	0	0	0	0	0	0	0	0	0	0	0.679	0	0	0	0	0	306810	0	2321387	0	0	0	0	0	0	299510	0	0	0	0	2.10095e+06	0	0	0	0	0	306810	0	2321387
Q6PGH2_T80	Jpt2	sp|Q6PGH2|JUPI2_MOUSE	Q6PGH2	GSGIFDESTPVQtR	0.9074	0	0	0.7463	0	0.901	0	0	0.5624	0	0	0	0	0	0	0	0	0	0.7815	0.9074	0	0	0	2.26378e+06	0	2.79257e+06	0	0	1427690	0	0	0	0	0	0	0	0	0	2.22546e+06	1.04597e+06	0	0	0	2.26378e+06	0
Q6PGH2_T91	Jpt2	sp|Q6PGH2|JUPI2_MOUSE	Q6PGH2	tSDIFGSPVTATAPLAHPNKPK	0.7949	0.2411	0.24	0.4324	0.4646	0.3279	0.2	0.2978	0.3587	0.3212	0.4713	0	0	0	0	0	0.4177	0.4747	0.4274	0.7949	0.3275	850682	306810	1.36985e+06	2321387	1448435	1.94229e+06	1.50867e+06	1.13814e+06	1.33662e+06	1766143	282358	0	239194	0	0	2.10095e+06	2.458e+06	1.04694e+06	2.393e+06	2.25319e+06	850682	306810	1.36985e+06	2321387
Q6PGL7_S1152	Washc2	sp|Q6PGL7|WASC2_MOUSE	Q6PGL7	GSQSVEGAGVMAGEPPsHSSGGR	0.7759	0	0	0	0	0	0	0	0.7759	0	0	0	0	0	0	0	0	0	0	0	0	0	0	0	0	0	732168	968580	683660	988255	616383	0	0	873097	0	0	0	0	828792	371576	693144	0	0	0	0
Q6RHR9_S930	Magi1	sp|Q6RHR9|MAGI1_MOUSE	Q6RHR9	AENEVPsPASSHHSSNQPASLTEEK	0.7973	0	0.2646	0.1429	0.7973	0	0	0	0	0	0	0	0	0	0	0	0	0	0	0	0	157790	131695	310984	278072	297992	0	0	0	0	0	0	0	0	0	0	0	0	0	0	0	157790	131695	310984	278072
Q6RT24_S2414	Cenpe	sp|Q6RT24|CENPE_MOUSE	Q6RT24	AQNLQDPVPKDsPK	1	0	0	1	1	1	0	0	0	0	0	0	0	0	0	0	0	0	0	0	0	0	0	146193	164723	111126	0	0	0	0	0	0	0	0	0	0	0	0	0	0	0	0	0	146193	164723
Q6ZPF4_S174	Fmnl3	sp|Q6ZPF4|FMNL3_MOUSE	Q6ZPF4	sIEDLQPPNALSAPFTNSLAR	0.9376	0	0.25	0.4648	0	0.5607	0.25	0.4707	0.25	0	0.25	0.8586	0.6942	0.9152	0.4637	0.4485	0.5442	0.25	0.9242	0.8968	0.9127	235187	350102	252570	305391	197970	475920	305391	481563	0	454754	0	494343	663769	337049	441615	377335	0	450933	442053	413260	235187	350102	252570	305391
Q6ZPJ3_S836	Ube2o	sp|Q6ZPJ3|UBE2O_MOUSE	Q6ZPJ3	NMTVEQLLTGSPtsPTVEPEKPTR	0.8092	0	0	0	0	0	0	0	0	0	0	0	0	0	0	0	0	0	0	0.8092	0	0	0	0	0	0	0	0	0	0	0	0	0	0	0	0	0	0	399065	993451	0	0	0	0	0
Q6ZPJ3_T835	Ube2o	sp|Q6ZPJ3|UBE2O_MOUSE	Q6ZPJ3	NMTVEQLLTGSPtsPTVEPEKPTR	0.8092	0	0	0	0	0	0	0	0	0	0	0	0	0	0	0	0	0	0	0.8092	0	0	0	0	0	0	0	0	0	0	0	0	0	0	0	0	0	0	399065	993451	0	0	0	0	0
Q78ZA7_S121	Nap1l4	sp|Q78ZA7|NP1L4_MOUSE	Q78ZA7	EFITGDVEPTDAEsAWHSENEEEDK	0.912	0.4759	0.6161	0.8509	0.4826	0.7637	0	0	0	0	0	0	0	0	0	0	0	0	0	0	0	4983000	3.23422e+06	8359080	12812331	7.98581e+06	0	0	0	0	0	0	0	0	0	0	0	0	0	0	0	4983000	3.23422e+06	8359080	12812331
Q78ZA7_S125	Nap1l4	sp|Q78ZA7|NP1L4_MOUSE	Q78ZA7	EFITGDVEPTDAESAWHsENEEEDK	0.9321	0.9105	0.5423	0.8724	0.8025	0.9106	0	0	0	0	0	0	0	0	0	0	0	0	0	0	0	4983000	3.23422e+06	7.4058e+06	12812331	8.33856e+06	0	0	0	0	0	0	0	0	0	0	0	0	0	0	0	4983000	3.23422e+06	7.4058e+06	12812331
Q78ZA7_S14	Nap1l4	sp|Q78ZA7|NP1L4_MOUSE	Q78ZA7	AENSLSDGGPADsVEAAK	0.9037	0	0	0	0	0	0.75	0	0	0	0	0	0.4601	0.5741	0	0	0	0.5179	0.6915	0	0.88	0	0	0	0	0	563324	0	0	0	0	0	1.22438e+06	0	0	0	0	1.53019e+06	0	0	739416	0	0	0	0
Q78ZA7_S49	Nap1l4	sp|Q78ZA7|NP1L4_MOUSE	Q78ZA7	LDNVsHTPSSYIETLPK	0.8956	0.1985	0.1961	0.4666	0.8956	0.8542	0.1667	0.4172	0	0	0	0	0	0	0	0	0.1974	0.184	0	0.6982	0.1667	2452415	1.3271e+06	2.0071e+06	2.63932e+06	4.19345e+06	83584.2	615590	162717	442257	385594	0	0	0	78835.2	153623	1.25097e+06	1.43493e+06	0	1.74094e+06	721155	1.27866e+06	762398	1.00897e+06	1237618
Q78ZA7_S5	Nap1l4	sp|Q78ZA7|NP1L4_MOUSE	Q78ZA7	AENsLSDGGPADSVEAAK;AENsLsDGGPADSVEAAK	0.9323	0.6667	0.9311	0.4898	0.8144	0.8944	0.4889	0.5945	0.4017	0.4829	0.4889	0.4798	0.3333	0.4893	0.4744	0.4482	0.3333	0.5901	0.49	0.6326	0.4898	894044	707696	850309	938142	557442	563324	861106	614635	952238	684239	1.78553e+06	1.22438e+06	0	643081	0	840517	1.53019e+06	0	1.02878e+06	739416	807518	707696	850309	763549
Q78ZA7_S53	Nap1l4	sp|Q78ZA7|NP1L4_MOUSE	Q78ZA7	LDNVSHTPsSYIETLPK	0.7675	0	0	0.2428	0	0	0	0	0	0	0	0	0	0	0	0	0	0	0	0	0	0	0	1.032e+06	0	0	0	0	0	0	0	0	0	0	0	0	0	0	0	0	0	0	0	1.032e+06	0
Q78ZA7_S54	Nap1l4	sp|Q78ZA7|NP1L4_MOUSE	Q78ZA7	LDNVSHTPSsYIETLPK	0.9282	0.4636	0	0	0	0	0	0	0	0	0	0	0	0	0	0	0	0.2962	0	0	0.2883	1.47641e+06	0	0	0	0	0	0	0	282860	0	0	0	0	0	0	0	726301	0	0	721155	895204	0	0	0
Q78ZA7_S7	Nap1l4	sp|Q78ZA7|NP1L4_MOUSE	Q78ZA7	AENSLsDGGPADSVEAAK;AENsLsDGGPADSVEAAK	0.9279	0.8944	0.4839	0.8316	0.8144	0.6691	0.8892	0	0.7407	0	0	0	0	0	0	0	0	0	0	0.9215	0.9054	894044	672640	850309	938142	0	563324	0	614635	0	0	0	0	0	0	0	0	0	0	1.02878e+06	739416	798842	672640	850309	792952
Q78ZA7_T111	Nap1l4	sp|Q78ZA7|NP1L4_MOUSE	Q78ZA7	EFItGDVEPTDAESAWHSENEEEDK;REFItGDVEPTDAESAWHSENEEEDKLAGDMK	0.9319	0.25	0.25	0	0.9319	0.25	0	0	0	0	0	0	0	0	0	0	0	0	0	0	0	4983000	3.23422e+06	7.4058e+06	10052484	1.18683e+06	0	0	0	0	0	0	0	0	0	0	0	0	0	0	0	4983000	3.23422e+06	7.4058e+06	10052484
Q78ZA7_T117	Nap1l4	sp|Q78ZA7|NP1L4_MOUSE	Q78ZA7	EFITGDVEPtDAESAWHSENEEEDK	0.8798	0.4569	0.4332	0.3825	0	0	0	0	0	0	0	0	0	0	0	0	0	0	0	0	0	4983000	4.84465e+06	8359080	0	0	0	0	0	0	0	0	0	0	0	0	0	0	0	0	0	4983000	4.84465e+06	8359080	0
Q78ZA7_T51	Nap1l4	sp|Q78ZA7|NP1L4_MOUSE	Q78ZA7	LDNVSHtPSSYIETLPK	0.9308	0.422	0	0	0.1985	0.9308	0	0	0	0	0	0	0	0	0	0	0	0	0	0	0	1.47641e+06	0	0	1.80243e+06	2435453	0	0	0	0	0	0	0	0	0	0	0	0	0	0	0	1.47641e+06	0	0	1.80243e+06
Q78ZA7_T58	Nap1l4	sp|Q78ZA7|NP1L4_MOUSE	Q78ZA7	LDNVSHTPSSYIEtLPK	0.8743	0	0.471	0.8743	0	0	0	0	0	0	0	0	0	0	0	0	0	0.4522	0	0.2001	0	0	639586	735863	0	0	0	0	0	0	0	0	0	0	0	0	0	726301	0	495804	0	0	639586	735863	0
Q78ZA7_Y55	Nap1l4	sp|Q78ZA7|NP1L4_MOUSE	Q78ZA7	LDNVSHTPSSyIETLPK	0.8297	0	0	0	0	0.5254	0	0	0	0	0	0	0	0	0	0	0	0	0	0	0	0	0	0	0	2435453	0	0	0	0	0	0	0	0	0	0	0	0	0	0	0	0	0	0	0
Q7M753_S55	Pank2	sp|Q7M753|PANK2_MOUSE	Q7M753	RAssAAPSGSGEAESVR	0.9215	0	0	0	0	0.9215	0	0	0	0	0	0	0	0	0	0	0	0	0	0	0	0	0	0	0	152992	0	0	0	0	0	0	0	0	0	0	0	0	0	0	0	0	0	0	0
Q7M753_S56	Pank2	sp|Q7M753|PANK2_MOUSE	Q7M753	RAssAAPSGSGEAESVR	0.9215	0	0	0	0	0.9215	0	0	0	0	0	0	0	0	0	0	0	0	0	0	0	0	0	0	0	152992	0	0	0	0	0	0	0	0	0	0	0	0	0	0	0	0	0	0	0
Q7TMY8_S1903	Huwe1	sp|Q7TMY8|HUWE1_MOUSE	Q7TMY8	GsGTASDDEFENLR	0.7767	0	0.6892	0.3333	0.3333	0.3333	0.3333	0.3333	0.3333	0.4568	0	0.3333	0	0.3333	0.3333	0.7767	0	0.3333	0	0	0	136440	0	189493	48704.4	200856	236119	263862	346831	252737	256301	527784	511657	627229	269406	0	214981	315174	423519	238208	246346	136440	0	189493	48704.4
Q7TMY8_S1907	Huwe1	sp|Q7TMY8|HUWE1_MOUSE	Q7TMY8	GSGTAsDDEFENLR	0.9203	0	0.5746	0	0	0	0	0	0	0	0	0	0	0	0	0	0	0	0.6532	0	0	0	215190	0	0	0	0	0	0	0	0	0	0	0	0	0	0	0	423519	0	0	0	215190	0	0
Q7TMY8_S3753	Huwe1	sp|Q7TMY8|HUWE1_MOUSE	Q7TMY8	LGsSGLGSASSIQAAVR	0.8986	0.3531	0.247	0	0.48	0.3271	0	0	0	0	0	0	0	0	0	0	0	0.2	0	0.472	0	127924	0	91343.2	0	0	0	0	0	0	67596.7	0	0	0	0	0	0	203668	0	126127	0	127924	0	91343.2	0
Q7TN29_S216	Smap2	sp|Q7TN29|SMAP2_MOUSE	Q7TN29	DLDLLAsVPSPSSVSR	0.9085	0.5509	0	0	0.2	0.2	0.453	0.9085	0	0.7011	0.6441	0	0	0	0	0	0.2	0.2	0	0.2	0	222098	0	0	274590	335992	0	0	0	0	0	0	0	0	0	0	0	484192	0	334304	0	222098	0	0	274590
Q7TN29_S224	Smap2	sp|Q7TN29|SMAP2_MOUSE	Q7TN29	DLDLLASVPSPSSVsR	0.8999	0	0	0.8312	0.8775	0.6741	0	0	0	0	0.8999	0	0	0	0	0	0	0	0	0	0	0	0	272303	274590	390219	0	0	0	0	0	0	0	0	0	0	0	0	0	0	0	0	0	272303	274590
Q7TPE5_S299	Slc7a6os	sp|Q7TPE5|S7A6O_MOUSE	Q7TPE5	EFDYDsPHGLDsD	0.7783	0	0.7783	0	0	0	0	0	0	0	0	0	0	0	0	0	0	0	0	0	0	0	399919	0	0	0	0	0	0	0	0	0	0	0	0	0	0	0	0	0	0	0	399919	0	0
Q7TPE5_S305	Slc7a6os	sp|Q7TPE5|S7A6O_MOUSE	Q7TPE5	EFDYDsPHGLDsD	0.7783	0	0.7783	0	0	0	0	0	0	0	0	0	0	0	0	0	0	0	0	0	0	0	399919	0	0	0	0	0	0	0	0	0	0	0	0	0	0	0	0	0	0	0	399919	0	0
Q7TPS5_T291	C2cd5	sp|Q7TPS5|C2CD5_MOUSE	Q7TPS5	NQtYSFSPSK	0.8496	0.8496	0.2	0	0.2	0.2	0	0	0	0	0	0	0	0	0	0	0	0	0	0	0	186902	288443	232806	185817	307401	0	0	0	0	0	0	0	0	0	0	0	0	0	0	63716.5	186902	288443	232806	185817
Q7TPW1_S16	Nexn	sp|Q7TPW1|NEXN_MOUSE	Q7TPW1	EMLAsDDEEESSPK;EMLAsDDEEESsPKIEK	0.937	0.3333	0	0	0	0	0.8864	0.9288	0.9159	0.9287	0.8651	0.9043	0.937	0.9117	0.9324	0.7614	0.3333	0	0.9228	0.9237	0.3333	0	0	0	0	0	1634914	1.65756e+06	2.00874e+06	1.66075e+06	1.22733e+06	2.64396e+06	4091587	2.71659e+06	2.04806e+06	1.44799e+06	1.32119e+06	0	1.68779e+06	1.35412e+06	751624	0	0	0	0
Q7TPW1_S22	Nexn	sp|Q7TPW1|NEXN_MOUSE	Q7TPW1	EMLASDDEEEssPKIEK	0.8002	0	0	0	0.8002	0	0	0	0	0	0	0	0	0	0	0	0	0	0	0	0	0	0	0	916958	0	0	0	0	0	0	0	0	0	0	0	0	0	0	0	0	0	0	0	916958
Q7TPW1_S23	Nexn	sp|Q7TPW1|NEXN_MOUSE	Q7TPW1	EMLASDDEEESsPK;EMLASDDEEEssPKIEK;EMLAsDDEEESsPKIEK	0.9232	0	0	0	0.8002	0	0	0	0	0	0	0	0	0	0	0	0.5693	0	0	0	0	0	0	0	916958	0	0	0	0	0	0	0	0	0	0	0	1.32119e+06	2.10641e+06	0	0	0	0	0	0	916958
Q7TPW1_S296	Nexn	sp|Q7TPW1|NEXN_MOUSE	Q7TPW1	TVsQESLTPGK;TVsQESLtPGK	0.9085	0.3274	0.3251	0	0	0.3262	0	0	0	0	0	0	0.255	0.9085	0	0	0.4815	0	0.4728	0	0	554388	838308	233126	0	585472	0	0	0	0	0	0	2.42451e+06	1.91102e+06	0	991241	899498	0	1.78376e+06	0	0	545390	824703	229343	0
Q7TPW1_S299	Nexn	sp|Q7TPW1|NEXN_MOUSE	Q7TPW1	TVSQEsLTPGK	0.8928	0.4843	0.469	0.4593	0	0	0	0.4757	0	0.4737	0	0	0	0	0.8664	0	0	0.4642	0	0	0	324828	340949	630135	161019	0	0	1.8183e+06	0	1.82763e+06	0	0	0	0	581772	0	0	234840	0	178826	0	324828	340949	630135	161019
Q7TPW1_S434	Nexn	sp|Q7TPW1|NEXN_MOUSE	Q7TPW1	KsESPFTHK	0.8106	0	0	0	0	0.3333	0.3333	0	0	0	0	0	0	0	0	0	0	0.8106	0	0.3333	0	136129	160963	0	0	293055	0	0	0	0	194364	0	0	0	0	0	382734	253285	236157	270396	0	136129	160963	0	0
Q7TPW1_S436	Nexn	sp|Q7TPW1|NEXN_MOUSE	Q7TPW1	SEsPFTHK	0.9022	0	0.4687	0	0.9022	0	0	0	0	0	0	0	0	0	0	0	0	0	0	0	0	0	373372	0	273045	0	0	0	0	0	0	0	0	0	0	0	0	0	0	0	0	0	373372	0	273045
Q7TPW1_S495	Nexn	sp|Q7TPW1|NEXN_MOUSE	Q7TPW1	KREDEEEEEGsIVNGSTTEDEEQTR	0.926	0	0	0	0.2	0.2	0	0	0	0	0	0	0	0	0	0.7505	0	0	0	0	0	306425	0	0	450224	349505	0	237227	128951	246383	220198	317834	0	247686	261106	230930	63350	0	125328	241269	0	306425	0	0	450224
Q7TPW1_S523	Nexn	sp|Q7TPW1|NEXN_MOUSE	Q7TPW1	NTsVVDSEPVR	0.936	0	0	0	0.4074	0	0	0	0	0	0	0	0	0	0	0	0.4871	0	0	0.936	0	0	0	0	367834	0	0	0	0	185071	0	0	0	0	0	0	271209	0	0	386962	0	0	0	0	367834
Q7TPW1_T294	Nexn	sp|Q7TPW1|NEXN_MOUSE	Q7TPW1	tVSQESLTPGK	0.9238	0.4809	0.4794	0.4795	0.4811	0.8058	0.8434	0.25	0.8168	0.7507	0.916	0.3298	0.33	0.25	0.9217	0.4823	0.4349	0.8469	0.6104	0.4863	0.4858	554388	1.0761e+06	762129	450783	585472	1994332	2.36273e+06	1.9924e+06	1.82763e+06	1.37842e+06	1948253	2.73531e+06	1.91102e+06	581772	179435	899498	1.054e+06	1.78376e+06	1.53744e+06	1.473e+06	549418	898203	632394	446741
Q7TPW1_T301	Nexn	sp|Q7TPW1|NEXN_MOUSE	Q7TPW1	TVSQESLtPGK;TVsQESLtPGK	0.9246	0	0	0	0	0	0	0	0	0	0.9246	0	0	0	0	0	0	0.8771	0	0	0	0	0	0	0	0	0	0	0	0	0	0	0	0	0	0	0	715354	0	0	0	0	0	0	0
Q7TPW1_T439	Nexn	sp|Q7TPW1|NEXN_MOUSE	Q7TPW1	KSESPFtHK;SESPFtHK	0.8991	0.8991	0	0.8323	0	0	0	0	0	0	0	0	0	0	0	0	0	0	0	0	0	265417	0	300704	0	0	0	0	0	0	0	0	0	0	0	0	0	0	0	0	156121	265417	0	300704	0
Q7TPW1_T94	Nexn	sp|Q7TPW1|NEXN_MOUSE	Q7TPW1	RAEQIEDINNTGtESASEEGDDSLLITVVPAK	0.7797	0	0	0	0	0	0	0	0	0	0	0	0	0	0	0	0	0	0	0	0	0	0	264357	0	0	0	0	0	0	0	0	0	0	0	0	0	0	0	0	0	0	0	264357	0
Q7TPX8_S135	Oog2	sp|Q7TPX8|OOG2_MOUSE	Q7TPX8	PVENsPGYGTK	0.8305	0.3333	0.3333	0.8305	0	0.4448	0	0	0	0	0	0	0	0	0	0	0	0	0	0	0	0	309296	205230	0	0	0	0	0	0	0	0	0	0	0	0	0	0	0	0	0	0	309296	205230	0
Q7TQH0_S109	Atxn2l	sp|Q7TQH0|ATX2L_MOUSE	Q7TQH0	GPPQsPVFEGVYNNSR	0.9108	0.8303	0.7469	0.9021	0.5285	0.8715	0	0	0	0	0	0	0	0	0	0	0	0	0	0	0	243687	297122	255761	242116	140544	0	0	0	0	0	0	0	0	0	0	0	0	0	0	0	243687	297122	255761	242116
Q7TQH0_S333	Atxn2l	sp|Q7TQH0|ATX2L_MOUSE	Q7TQH0	QGsGREsPSLVSR	0.7606	0	0	0	0	0	0	0	0	0	0	0	0	0	0	0	0	0	0	0	0	0	0	0	0	294834	0	0	0	0	0	0	0	0	0	0	0	0	0	0	0	0	0	0	0
Q7TQH0_S337	Atxn2l	sp|Q7TQH0|ATX2L_MOUSE	Q7TQH0	QGsGREsPSLVSR	0.7583	0	0	0	0	0	0	0	0	0	0	0	0	0	0	0	0	0	0	0	0	0	0	0	0	294834	0	0	0	0	0	0	0	0	0	0	0	0	0	0	0	0	0	0	0
Q7TQH0_S560	Atxn2l	sp|Q7TQH0|ATX2L_MOUSE	Q7TQH0	LQPsSSPETGLDPFPSR	0.7876	0.3273	0.2476	0.2	0.2482	0.6752	0	0	0	0	0	0	0	0	0	0	0.2	0	0	0	0.2	641936	533817	801645	816823	650794	0	0	0	0	0	0	0	0	0	0	0	0	172405	0	0	641936	533817	801645	816823
Q7TQH0_S572	Atxn2l	sp|Q7TQH0|ATX2L_MOUSE	Q7TQH0	LQPSSSPETGLDPFPsR	0.8861	0	0	0.8861	0.4075	0	0	0	0	0	0	0	0	0	0	0	0	0	0	0	0	0	0	51614.3	816823	0	0	0	0	0	0	0	0	0	0	0	0	0	0	0	0	0	0	0	816823
Q7TQH0_S601	Atxn2l	sp|Q7TQH0|ATX2L_MOUSE	Q7TQH0	EVDGLLTSDPMGSPVSsK	0.8833	0	0	0	0	0.8833	0	0	0	0	0	0	0	0	0	0	0	0	0	0	0	0	0	0	0	204168	0	0	0	0	0	0	0	0	0	0	0	0	0	0	0	0	0	0	0
Q7TQH0_T565	Atxn2l	sp|Q7TQH0|ATX2L_MOUSE	Q7TQH0	LQPSSSPEtGLDPFPSR	0.835	0.6952	0	0	0	0.4604	0	0	0	0	0	0	0	0	0	0	0	0	0	0	0	641936	0	0	0	650794	0	0	0	0	0	0	0	0	0	0	0	306701	0	0	0	641936	0	0	0
Q7TQH0_T591	Atxn2l	sp|Q7TQH0|ATX2L_MOUSE	Q7TQH0	EVDGLLtSDPMGSPVSSK	0.826	0.3013	0.3216	0.2	0.4514	0	0	0	0	0	0	0	0	0	0	0	0	0	0	0	0	253995	341599	256434	202106	0	0	0	0	0	0	0	0	0	0	0	0	0	0	0	0	253995	341599	256434	202106
Q7TSC1_S1145	Prrc2a	sp|Q7TSC1|PRC2A_MOUSE	Q7TSC1	EGVLGQVPLAPPQPGAPPsPAPAR	1	0	0	0	0	1	0	1	0	0	1	0	1	0	0	0	1	1	0	0	1	0	0	157213	0	189741	215810	242048	225546	293035	219197	0	0	0	0	0	266677	0	288361	348771	302730	0	0	157213	0
Q7TSI3_S738	Ppp6r1	sp|Q7TSI3|PP6R1_MOUSE	Q7TSI3	EADMSSIQIPssPPAHGSPQLR	0.7893	0	0	0	0.7893	0	0	0	0	0	0	0	0	0	0	0	0	0	0	0	0	90487.1	134345	208281	160122	86094.6	0	0	0	0	0	0	0	0	0	0	0	0	0	0	0	90487.1	134345	208281	160122
Q7TSI3_S739	Ppp6r1	sp|Q7TSI3|PP6R1_MOUSE	Q7TSI3	EADMSSIQIPssPPAHGSPQLR	0.7893	0	0	0	0.7893	0	0	0	0	0	0	0	0	0	0	0	0	0	0	0	0	90487.1	134345	208281	160122	86094.6	0	0	0	0	0	0	0	0	0	0	0	0	0	0	0	90487.1	134345	208281	160122
Q80SU3_S124	Zar1	sp|Q80SU3|ZAR1_MOUSE	Q80SU3	GHAGAGRsPR	1	0	0	0	1	0	0	0	0	0	0	0	0	0	0	0	0	0	0	0	0	31645.3	0	89989.4	371094	0	0	0	0	0	0	0	0	0	0	0	0	0	0	0	0	31645.3	0	89989.4	371094
Q80SU3_S244	Zar1	sp|Q80SU3|ZAR1_MOUSE	Q80SU3	DQAsPQSTEQDK	0.9383	0.3333	0.9086	0.9379	0.489	0.3333	0	0	0	0	0	0	0	0	0	0	0	0	0	0	0	679634	0	0	0	0	0	0	0	0	0	0	0	0	0	0	0	0	0	0	0	679634	0	0	0
Q80U62_S655	Rubcn	sp|Q80U62|RUBIC_MOUSE	Q80U62	LLPIPDSLPIsPDDGQHADIYK	0.9021	0	0	0.4799	0	0	0	0	0	0	0	0	0	0	0	0	0	0	0	0	0	0	0	476465	0	364052	0	0	0	0	0	0	0	0	0	0	0	128851	167378	132847	0	0	0	476465	0
Q80U87_S392	Usp8	sp|Q80U87|UBP8_MOUSE	Q80U87	AEAsPIIQPAPATK	0.9239	0.7855	0.5	0	0	0.5	0	0	0	0	0	0	0	0	0	0	0	0	0	0.5	0	0	138180	0	0	0	0	0	0	0	0	0	0	0	0	0	0	0	0	0	0	0	0	0	0
Q80UU9_S202	Pgrmc2	sp|Q80UU9|PGRC2_MOUSE	Q80UU9	LLKPGEEPsEYTDEEDTK	0.7603	0.3286	0.25	0.25	0.25	0.25	0.3158	0	0.25	0.3189	0.3288	0.25	0	0.7436	0.3259	0	0.25	0.25	0.25	0.7603	0.3292	480829	582884	667381	764102	729579	490399	0	763798	1.12688e+06	643967	1.50725e+06	857822	813804	631107	0	722642	764102	655438	764103	791028	480829	582884	667381	764102
Q80UU9_T210	Pgrmc2	sp|Q80UU9|PGRC2_MOUSE	Q80UU9	LLKPGEEPSEYTDEEDtK;PGEEPSEYTDEEDtK	0.7985	0	0	0	0.7665	0	0	0	0	0	0.7686	0	0	0	0	0	0	0	0	0.7082	0	0	0	0	764102	0	0	0	0	0	643967	0	0	0	0	0	0	0	0	764103	0	0	0	0	764102
Q80UU9_Y204	Pgrmc2	sp|Q80UU9|PGRC2_MOUSE	Q80UU9	LLKPGEEPSEyTDEEDTK	0.8748	0	0.3226	0	0	0	0	0.4478	0.4764	0	0.325	0	0	0	0.3136	0.3085	0	0	0.303	0.4694	0	0	582884	0	0	0	0	716156	763798	0	643967	0	0	0	577011	775177	0	0	573512	764103	0	0	582884	0	0
Q80VC9_S193	Camsap3	sp|Q80VC9|CAMP3_MOUSE	Q80VC9	AsPAAPLDGAsPAQPSIR	0.8678	0	0.8678	0.6667	0.8365	0.6667	0	0	0	0	0	0	0	0	0	0	0	0	0	0	0	0	269876	0	0	0	0	0	0	0	0	0	0	0	0	0	0	0	0	0	0	0	269876	0	0
Q80VC9_S202	Camsap3	sp|Q80VC9|CAMP3_MOUSE	Q80VC9	AsPAAPLDGAsPAQPSIR	0.8678	0	0.8678	0.6667	0.8365	0.6667	0	0	0	0	0	0	0	0	0	0	0	0	0	0	0	0	269876	0	0	0	0	0	0	0	0	0	0	0	0	0	0	0	0	0	0	0	269876	0	0
Q80VC9_S334	Camsap3	sp|Q80VC9|CAMP3_MOUSE	Q80VC9	DLPDGHAVsPR	1	0	0	0	0	0	0	1	0	1	0	0	0	0	0	0	0	0	1	1	0	0	0	0	0	0	0	0	0	0	156456	0	0	0	0	0	0	0	311880	0	319971	0	0	0	0
Q80VC9_S582	Camsap3	sp|Q80VC9|CAMP3_MOUSE	Q80VC9	AEAEsGLGSPTSTPVAPEALSSEMSELGAR	0.8516	0	0	0	0	0	0	0	0	0	0	0	0	0	0	0	0	0.8516	0	0	0	0	0	0	0	0	0	0	0	0	0	0	0	0	0	0	0	335060	0	0	0	0	0	0	0
Q80VC9_S812	Camsap3	sp|Q80VC9|CAMP3_MOUSE	Q80VC9	KFsPSQVPVQTR	0.9342	0.9108	0.4284	0.4508	0.9342	0.4831	0	0	0	0	0	0	0	0	0	0	0	0	0	0	0	238360	342600	338942	372130	285935	0	0	0	0	0	0	0	0	0	0	0	266849	216738	235776	238795	238360	342600	338942	372130
Q80VC9_T797	Camsap3	sp|Q80VC9|CAMP3_MOUSE	Q80VC9	VLtPPHDVDSLPHLR	0.9246	0	0	0	0	0	0	0	0	0	0	0	0	0	0	0	0	0	0	0.5	0	0	0	0	0	0	161626	138600	93411.4	120151	155778	0	0	0	0	0	191354	203081	0	184668	112892	0	0	0	0
Q80VC9_T820	Camsap3	sp|Q80VC9|CAMP3_MOUSE	Q80VC9	KFSPSQVPVQtR	0.8419	0.5602	0	0.5308	0	0.7798	0	0	0	0	0	0	0	0	0	0	0	0	0	0	0	238360	0	336538	0	0	0	0	0	0	0	0	0	0	0	0	0	0	0	0	0	238360	0	336538	0
Q80W47_T397	Wipi2	sp|Q80W47|WIPI2_MOUSE	Q80W47	GAYVPSSPtR	0.9229	0	0	0	0	0	0	0.8497	0	0	0	0.6931	0	0	0	0	0	0.6547	0	0	0	0	0	0	0	0	0	409831	0	0	0	490042	0	0	0	0	0	849398	0	0	0	0	0	0	0
Q80W47_Y391	Wipi2	sp|Q80W47|WIPI2_MOUSE	Q80W47	GAyVPSSPTR	0.9322	0.3241	0.25	0.25	0.7614	0.8649	0.25	0	0	0.25	0.306	0	0.25	0.9039	0.25	0.25	0	0.25	0.25	0.25	0.3087	666897	706771	475076	570537	563062	464943	0	0	475782	401825	494165	712294	602611	0	469118	0	849398	732192	674138	681747	666897	706771	475076	570537
Q80W85_S184	Npm2	sp|Q80W85|NPM2_MOUSE	Q80W85	EEDETVVRPsPQDK;EEDETVVRPsPQDKSPWK;EEDETVVRPsPQDKsPWK;EEDEtVVRPsPQDKSPWK;VEKEEDETVVRPsPQDK	0.9448	0.9433	0.9448	0.9415	0.9423	0.9443	0.9173	0.7516	0.9204	0.9117	0	0.8085	0	0.5138	0.8327	0	0	0.9388	0.93	0.9414	0.937	49682252	52241256	25869800	21283658	46644696	2.98757e+06	1.46903e+06	2.24412e+06	1.35441e+06	400045	1.88271e+06	2.28415e+06	904294	994274	0	3.64809e+06	3.49642e+06	10191342	7540984	2726186	19237598	22646770	11959568	9642614
Q80W85_S189	Npm2	sp|Q80W85|NPM2_MOUSE	Q80W85	EEDETVVRPSPQDKsPWK;EEDETVVRPsPQDKsPWK;EEDEtVVRPSPQDKsPWK	0.9441	0.9291	0.8381	0.9169	0.9367	0.9441	0	0	0	0	0	0	0	0	0	0	0	0	0	0	0	10219583	5.97987e+06	15769138	16152704	11293284	0	0	0	0	0	0	0	0	0	0	0	0	0	0	0	6390028	14881752	7.10403e+06	9293669
Q80W85_S5	Npm2	sp|Q80W85|NPM2_MOUSE	Q80W85	HstSSVTETTAK;SRHsTSSVTETTAK;SRHsTSSVTETtAK;SRHstSSVTETTAK	0.926	0.2945	0.5501	0.926	0.2857	0.488	0	0	0.2857	0.1423	0.9143	0.2857	0	0	0	0.2846	0.6543	0.3277	0	0	0	3.11027e+06	80061912	4.05013e+06	169852	3.19762e+06	0	0	0	0	8504141	0	0	0	0	7716669	20934906	0	0	0	0	1.5527e+06	9868829	6748473	283014
Q80W85_S7	Npm2	sp|Q80W85|NPM2_MOUSE	Q80W85	SRHSTssVTETTAK	0.7955	0	0	0	0	0	0	0	0	0	0	0	0	0	0	0	0.3764	0	0	0	0	0	0	0	0	239990	0	0	0	0	0	0	0	0	0	0	16890192	0	0	0	0	0	0	0	0
Q80W85_S8	Npm2	sp|Q80W85|NPM2_MOUSE	Q80W85	HSTSsVTETTAK;SRHSTssVTETTAK	0.935	0	0	0	0	0.935	0	0	0	0	0	0.2427	0	0	0	0	0.3764	0	0	0	0	0	0	0	0	1.21637e+06	0	0	0	175802	0	683638	0	0	0	0	17122346	0	0	0	0	0	0	0	0
Q80W85_T12	Npm2	sp|Q80W85|NPM2_MOUSE	Q80W85	SRHSTSSVTEttAK	0.9395	0	0	0	0	0	0	0.9272	0	0	0	0	0	0	0	0	0	0.4507	0	0	0	0	0	0	0	0	0	21535294	0	0	0	0	0	0	0	0	0	8036927	0	0	0	0	0	0	0
Q80W85_T13	Npm2	sp|Q80W85|NPM2_MOUSE	Q80W85	HSTSSVTETtAK;SRHSTSSVTEttAK;SRHsTSSVTETtAK	0.9395	0	0	0	0	0	0	0.9272	0	0	0.9178	0	0	0	0	0	0	0.4507	0	0	0	0	0	0	0	0	0	21535294	0	0	8504141	0	0	0	0	0	0	8036927	0	0	0	0	0	0	0
Q80W85_T179	Npm2	sp|Q80W85|NPM2_MOUSE	Q80W85	EEDEtVVRPSPQDK;EEDEtVVRPSPQDKsPWK;EEDEtVVRPsPQDKSPWK	0.9391	0.8784	0.9268	0.7323	0.9267	0.7149	0	0.5	0.5	0.5	0.5	0.8871	0.5	0.5	0.5	0.5	0.5	0.7921	0.5	0.7505	0.5	35686452	52241256	25869800	22738304	46644696	0	2807762	2877133	788144	1.61871e+06	3.76326e+06	1146232	1.01143e+06	840135	1.53435e+06	6.07732e+06	5885845	5875560	7486715	3.32696e+06	19942450	22672734	11539659	9818856
Q80W85_T6	Npm2	sp|Q80W85|NPM2_MOUSE	Q80W85	HstSSVTETTAK;SRHstSSVTETTAK	0.926	0.2945	0.4676	0.926	0.2857	0.488	0	0	0.2857	0	0	0.2857	0	0	0	0.2846	0.6543	0.2787	0	0	0	3.11027e+06	78888832	4.05013e+06	169852	1.62165e+06	0	0	0	0	0	0	0	0	0	7716669	20934906	0	0	0	0	1.41326e+06	9253941	6139093	257458
Q80WQ2_T11	Vac14	sp|Q80WQ2|VAC14_MOUSE	Q80WQ2	DFAPLtPNIVR	1	0	0	0	0	0	0	0	0	0	0	0	0	0	0	0	1	1	0	1	0	0	0	0	0	0	0	0	0	0	0	0	0	0	0	0	0	104165	0	167519	112543	0	0	0	0
Q80X90_S885	Flnb	sp|Q80X90|FLNB_MOUSE	Q80X90	APLNVQFsSPLPGEAVK	0.8678	0.5	0.5	0.5	0.5	0.5	0	0	0	0	0	0	0	0	0	0	0	0	0	0	0	562740	361319	694221	1.01798e+06	742635	0	0	0	0	0	0	0	0	0	0	0	0	0	247040	0	562740	361319	694221	1.01798e+06
Q80X90_S886	Flnb	sp|Q80X90|FLNB_MOUSE	Q80X90	APLNVQFSsPLPGEAVK	0.8813	0	0	0	0.8813	0	0	0	0	0	0	0	0	0	0	0	0	0	0	0	0	0	0	0	1.01798e+06	0	0	0	0	0	0	0	0	0	0	0	0	0	0	0	0	0	0	0	1.01798e+06
Q80X90_S932	Flnb	sp|Q80X90|FLNB_MOUSE	Q80X90	sPFTVGVAAPLDLSK	0.9306	0.4162	0.4907	0.4817	0.4833	0.9306	0	0	0	0	0	0	0	0	0	0	0	0	0	0.488	0	331643	0	467127	520356	567569	0	0	0	0	0	0	0	0	0	0	0	0	161049	0	0	331643	0	467127	520356
Q80X90_S945	Flnb	sp|Q80X90|FLNB_MOUSE	Q80X90	SPFTVGVAAPLDLsK	0.9384	0.3844	0	0.9384	0	0	0	0	0	0	0	0	0	0	0	0	0	0	0	0	0	331643	0	467127	0	0	0	0	0	0	0	0	0	0	0	0	0	0	0	0	0	331643	0	467127	0
Q80X90_S983	Flnb	sp|Q80X90|FLNB_MOUSE	Q80X90	LDVTILsPSR	0.9016	0.4868	0	0	0	0.9016	0	0	0	0	0	0	0	0	0	0	0	0	0	0	0	215028	128556	186312	0	129716	0	0	0	0	0	0	0	0	0	0	0	128790	0	0	0	215028	128556	186312	0
Q80XU3_S113	Nucks1	sp|Q80XU3|NUCKS_MOUSE	Q80XU3	EMLLEDVGsEEEPEEDDEAPFQEK	1	0	0	1	0	1	0	0	0	0	0	0	0	0	0	0	1	1	0	0	0	0	0	0	0	0	0	0	0	0	0	0	0	0	0	0	187599	203880	0	294136	0	0	0	0	0
Q80XU3_S181	Nucks1	sp|Q80XU3|NUCKS_MOUSE	Q80XU3	ATVTPsPVK;ATVtPsPVK	0.9439	0	0	0.7402	0.7598	0	0	0	0	0.8873	0	0.921	0	0	0	0	0	0.8437	0	0	0	476448	844970	628635	582244	0	0	0	0	263665	0	0	0	0	0	0	0	449181	0	0	0	476448	844970	628635	582244
Q80XU3_S19	Nucks1	sp|Q80XU3|NUCKS_MOUSE	Q80XU3	VVDYSQFQEsDDADEDYGR;VVDYSQFQEsDDADEDYGRDSGPPAK	0.9236	0	0	0	0	0	0	0	0	0.433	0	0	0	0	0	0	0	0	0	0	0	0	570186	0	0	0	0	0	0	0	0	0	0	202151	255534	0	0	0	0	0	0	0	570186	0	0
Q80XU3_S214	Nucks1	sp|Q80XU3|NUCKS_MOUSE	Q80XU3	EEDEEAEsPPEK	1	1	1	0	0	0	0	0	0	0	0	0	0	0	0	0	0	0	0	0	0	0	155388	0	0	0	0	0	0	0	0	0	0	0	0	0	0	0	0	0	0	0	155388	0	0
Q80XU3_T179	Nucks1	sp|Q80XU3|NUCKS_MOUSE	Q80XU3	ATVtPsPVK	0.9439	0	0	0.7402	0.7598	0	0	0	0	0.8873	0	0	0	0	0	0	0	0.8437	0	0	0	476448	844970	628635	582244	0	0	0	0	263665	0	0	0	0	0	0	0	449181	0	0	0	476448	844970	628635	582244
Q80XU3_Y13	Nucks1	sp|Q80XU3|NUCKS_MOUSE	Q80XU3	VVDySQFQESDDADEDYGR	0.8686	0.3192	0	0.3244	0.25	0.25	0	0.25	0	0	0.25	0	0	0	0	0.25	0	0	0	0	0	807973	0	753711	590360	382926	0	0	0	0	0	0	0	0	0	0	0	0	0	0	0	807973	0	753711	590360
Q80XU3_Y26	Nucks1	sp|Q80XU3|NUCKS_MOUSE	Q80XU3	VVDYSQFQESDDADEDyGR	0.7753	0	0.7524	0	0.6373	0.4688	0	0	0	0	0	0	0	0	0	0	0	0	0	0	0	130064	275495	0	590360	382926	0	0	0	0	0	0	0	0	0	0	0	0	0	0	0	130064	275495	0	590360
Q80Y81_S797	Elac2	sp|Q80Y81|RNZ2_MOUSE	Q80Y81	AALLTQQADsPEDREPQQK	0.8178	0	0.8178	0	0	0	0	0	0	0	0	0	0	0	0	0	0	0	0	0	0	383945	324191	296724	471287	324623	0	0	0	0	0	0	0	0	0	0	0	0	0	0	0	383945	324191	296724	471287
Q80YA3_S370	Ddhd1	sp|Q80YA3|DDHD1_MOUSE	Q80YA3	EPTSVSDSENIAAIPsPVtSPVLSR	0.7676	0	0	0	0.4638	0	0	0	0	0	0	0	0	0	0	0	0	0	0	0	0	0	148056	0	0	0	0	0	0	0	0	0	0	0	0	0	0	0	0	0	0	0	148056	0	0
Q80YA3_T373	Ddhd1	sp|Q80YA3|DDHD1_MOUSE	Q80YA3	EPTSVSDSENIAAIPsPVtSPVLSR	0.7676	0	0	0	0.4638	0	0	0	0	0	0	0	0	0	0	0	0	0	0	0	0	0	148056	0	0	0	0	0	0	0	0	0	0	0	0	0	0	0	0	0	0	0	148056	0	0
Q80ZX8_S703	Spag1	sp|Q80ZX8|SPAG1_MOUSE	Q80ZX8	ESGVDPSQVLLsPDSSEAAR	0.8294	0.3264	0	0	0.3271	0	0	0	0	0	0	0	0	0	0	0	0	0	0	0.293	0	202990	0	0	0	0	0	0	0	0	0	0	0	0	0	0	0	0	0	0	0	202990	0	0	0
Q80ZX8_S739	Spag1	sp|Q80ZX8|SPAG1_MOUSE	Q80ZX8	IQVQEVDGssDEEPERPAEASATSAPAR	0.8874	0	0.5705	0	0	0.4	0.4	0	0	0	0	0	0	0	0	0	0	0	0.4	0	0	408564	475199	624052	715377	497403	129517	242764	199486	174411	201222	0	0	0	196957	0	228142	280490	294686	290633	295579	408564	475199	624052	715377
Q80ZX8_S740	Spag1	sp|Q80ZX8|SPAG1_MOUSE	Q80ZX8	IQVQEVDGssDEEPERPAEASATSAPAR	0.8874	0	0.5705	0	0	0.4	0.4	0	0	0	0	0	0	0	0	0	0	0	0.4	0	0	408564	475199	624052	715377	497403	129517	242764	199486	174411	201222	0	0	0	196957	0	228142	280490	294686	290633	295579	408564	475199	624052	715377
Q8BGD9_S445	Eif4b	sp|Q8BGD9|IF4B_MOUSE	Q8BGD9	sLENETLNK	0.9369	0.5	0.5	0.9187	0	0	0	0	0	0	0	0	0	0	0	0	0	0	0	0	0	407706	722006	371738	0	0	0	0	0	0	0	0	0	0	0	0	0	0	0	0	0	407706	722006	371738	0
Q8BGD9_T450	Eif4b	sp|Q8BGD9|IF4B_MOUSE	Q8BGD9	SLENEtLNK	0.8721	0.5112	0.6343	0	0	0.8721	0	0	0	0	0	0	0	0	0	0	0	0	0	0	0	407706	722006	0	0	464969	0	0	0	0	0	0	0	0	0	0	0	0	0	0	0	407706	722006	0	0
Q8BH66_S10	Atl1	sp|Q8BH66|ATLA1_MOUSE	Q8BH66	DRNsWGGFSEK	0.8814	0	0	0	0	0	0	0	0	0	0	0	0	0	0	0	0	0	0	0	0	0	0	0	169648	0	0	0	0	0	0	0	0	0	0	0	0	0	0	0	0	0	0	0	169648
Q8BHL8_S153	Psmf1	sp|Q8BHL8|PSMF1_MOUSE	Q8BHL8	ANsPPREFPPATAR	0.933	0.5	0	0.928	0.712	0.9106	0.9101	0.9256	0.8984	0.7033	0.596	0	0	0	0	0.5	0.5	0.7558	0.8697	0.8783	0	435420	396791	283522	239605	351671	282671	263645	223137	251996	263099	0	367078	595270	302569	222218	459449	671614	620444	423064	452039	310992	277392	201141	239605
Q8BHL8_T162	Psmf1	sp|Q8BHL8|PSMF1_MOUSE	Q8BHL8	ANSPPREFPPAtAR	0.8767	0	0	0	0	0	0.8767	0	0.5772	0	0	0	0	0.7261	0	0	0	0.5734	0	0	0	79960	138239	0	0	0	249222	300125	223137	0	0	365764	259527	557541	296572	247217	81901.1	428103	183150	421385	493090	111219	192282	0	0
Q8BI84_S1915	Mia3	sp|Q8BI84|TGO1_MOUSE	Q8BI84	PAsPSSVQDR	0.9231	0.3333	0	0.3333	0.9231	0	0	0	0	0	0	0	0	0	0	0	0	0	0	0	0	0	0	0	58362.1	0	0	0	0	0	0	0	0	0	0	0	0	0	0	0	0	0	0	0	58362.1
Q8BI84_T355	Mia3	sp|Q8BI84|TGO1_MOUSE	Q8BI84	PMIEKyLtDK	1	0	0	0	0	0	0	0	0	0	0	0	1	0	0	0	0	0	0	0	0	0	0	0	0	0	0	0	0	0	0	0	347331	0	0	0	0	0	0	0	0	0	0	0	0
Q8BI84_Y353	Mia3	sp|Q8BI84|TGO1_MOUSE	Q8BI84	PMIEKyLtDK	1	0	0	0	0	0	0	0	0	0	0	0	1	0	0	0	0	0	0	0	0	0	0	0	0	0	0	0	0	0	0	0	347331	0	0	0	0	0	0	0	0	0	0	0	0
Q8BIJ7_S48	Rufy1	sp|Q8BIJ7|RUFY1_MOUSE	Q8BIJ7	sQLPSPGELR	0.9349	0.9349	0.6385	0.8017	0.5	0.5	0.5	0.5	0.8508	0.5	0.5	0	0	0	0	0	0.5	0.5	0.733	0.83	0.5	2.18874e+06	2.94415e+06	3406606	3.1831e+06	4.04541e+06	1.41581e+06	1.37059e+06	1.30966e+06	1370756	1.25242e+06	0	0	0	0	0	2214471	3.10513e+06	2.93922e+06	2.19115e+06	2.96252e+06	2.18874e+06	2578339	2.72556e+06	2855218
Q8BIJ7_S52	Rufy1	sp|Q8BIJ7|RUFY1_MOUSE	Q8BIJ7	SQLPsPGELR	0.9445	0.9421	0.9401	0.938	0.9411	0.9414	0.9218	0.9103	0.9377	0.9394	0.9377	0	0	0	0	0	0.9394	0.9414	0.9404	0.9421	0.9395	2467117	2.86404e+06	3406606	3.58208e+06	4.04541e+06	1.26039e+06	1.59543e+06	1.30966e+06	1.18356e+06	857074	0	67450.5	0	0	0	2.48997e+06	3.38736e+06	2.50921e+06	2.08743e+06	2480820	2.02968e+06	2.2817e+06	2.5826e+06	3.02456e+06
Q8BIL5_S235	Hook1	sp|Q8BIL5|HOOK1_MOUSE	Q8BIL5	LDQLDGsFDDPNTMVAK	0.9321	0	0	0	0.5	0.9321	0	0	0	0	0	0	0	0	0	0	0	0	0	0	0	222682	0	157069	0	177753	0	0	0	0	0	0	0	0	0	0	0	0	0	0	0	222682	0	157069	0
Q8BJ05_S515	Zc3h14	sp|Q8BJ05|ZC3HE_MOUSE	Q8BJ05	DLVQPDKPAsPK	1	0	1	0	0	0	0	0	0	0	0	0	0	0	0	0	0	0	0	0	0	0	121784	164410	86749.7	0	0	0	0	0	0	0	0	0	0	0	0	0	0	0	0	0	121784	164410	86749.7
Q8BJF9_S199	Chmp2b	sp|Q8BJF9|CHM2B_MOUSE	Q8BJF9	ATIsDEEIER	0.9297	0	0	0	0	0	0	0	0	0	0.9137	0	0	0	0	0	0.8951	0	0	0	0	0	0	0	0	0	0	0	0	0	0	0	0	0	0	0	140782	0	0	0	0	0	0	0	0
Q8BJL1_S383	Fbxo30	sp|Q8BJL1|FBX30_MOUSE	Q8BJL1	DVNGsPFSHAPSFK	0.9212	0	0.3443	0	0.4788	0	0	0	0	0	0	0	0	0	0	0	0	0	0	0	0	363464	204294	0	509105	0	0	0	0	0	0	0	0	0	0	0	0	0	0	0	0	363464	204294	0	509105
Q8BMG7_S448	Rab3gap2	sp|Q8BMG7|RBGPR_MOUSE	Q8BMG7	GGFsPFGNTQGPSR	0.9375	0.9375	0.9204	0.9077	0.8598	0.9336	0.6566	0	0	0	0	0	0	0	0	0	0	0	0.7345	0.8407	0.3333	679392	594610	853639	0	478226	0	0	154598	0	0	0	0	0	0	0	211013	0	416206	241361	237634	524675	594610	553681	0
Q8BP27_S115	Sfr1	sp|Q8BP27|SFR1_MOUSE	Q8BP27	ENPPsPHSNSSGK	0.9209	0	0.25	0	0	0.9209	0	0	0	0	0	0	0	0	0	0	0	0	0	0	0	0	0	0	0	339201	0	0	0	0	0	0	0	0	0	0	0	0	0	0	0	0	0	0	0
Q8BP27_S127	Sfr1	sp|Q8BP27|SFR1_MOUSE	Q8BP27	QPLsGTPK	0.8347	0	0	0	0.8347	0	0	0	0	0	0	0	0	0	0	0	0	0	0	0	0	134035	0	0	109662	0	0	0	0	0	0	0	0	0	0	0	0	0	0	0	0	134035	0	0	109662
Q8BP27_S67	Sfr1	sp|Q8BP27|SFR1_MOUSE	Q8BP27	ENPPsPPTSPAAPQPR;ENPPsPPTsPAAPQPR;ENPPsPPtSPAAPQPR	0.9311	0.6821	0.6667	0.6825	0.6832	0.6667	0.6667	0.6667	0.681	0.6817	0.6827	0	0.6667	0.6667	0.6667	0.3333	0.6667	0.6816	0.6667	0.6667	0.6667	394669	615610	817198	528550	1.32777e+06	790790	327460	779471	1.05831e+06	516301	936463	849441	498398	295878	368980	430005	659417	567577	726077	465181	413424	644863	856031	553667
Q8BP27_S71	Sfr1	sp|Q8BP27|SFR1_MOUSE	Q8BP27	ENPPSPPtsPAAPQPR;ENPPsPPTsPAAPQPR	0.8693	0.7709	0	0.8077	0	0.6821	0.8453	0	0	0	0	0	0	0	0	0	0.7617	0	0	0	0	394669	0	692667	0	795788	247546	0	0	0	0	0	0	0	0	0	430005	0	0	0	0	391691	0	547925	0
Q8BP27_T129	Sfr1	sp|Q8BP27|SFR1_MOUSE	Q8BP27	QPLSGtPK	0.9378	0	0.9378	0	0	0.9248	0	0	0	0	0	0	0	0	0	0	0	0	0	0	0	0	295045	0	109662	381976	0	0	0	0	0	0	0	0	0	0	0	0	0	0	0	0	295045	0	109662
Q8BP27_T70	Sfr1	sp|Q8BP27|SFR1_MOUSE	Q8BP27	ENPPSPPtsPAAPQPR;ENPPsPPtSPAAPQPR	0.9155	0.7709	0.6667	0.8055	0.6584	0.6667	0.8453	0.6667	0.6595	0.6592	0.6587	0	0.6667	0.6667	0.6667	0	0.7617	0.6592	0.6667	0.6667	0.6667	789338	615610	1.50986e+06	528550	870974	495093	327460	526377	457418	312099	461429	521020	498398	295878	211819	860010	659417	567577	726077	465181	402902	618118	783324	530704
Q8BRF7_S294	Scfd1	sp|Q8BRF7|SCFD1_MOUSE	Q8BRF7	VNLEEsTGVENSPAGARPK	0.903	0.3333	0.3333	0.3333	0.7603	0.3333	0.3333	0.4001	0.3333	0.3333	0.3333	0	0.3333	0	0	0	0.3333	0.3333	0.3333	0.4488	0.3333	465513	747410	877207	598053	1.08292e+06	528720	622227	537545	525451	570470	276242	207837	456086	0	0	666011	904603	796558	830001	753859	465513	747410	877207	598053
Q8BRF7_S300	Scfd1	sp|Q8BRF7|SCFD1_MOUSE	Q8BRF7	VNLEESTGVENsPAGAR;VNLEESTGVENsPAGARPK	0.9305	0	0.8008	0.8937	0	0.748	0	0.4673	0	0.6707	0	0	0	0	0	0	0	0	0	0.8258	0.8548	0	747410	877207	0	1.08292e+06	0	622227	0	525451	0	0	0	0	0	166325	0	0	0	830001	753859	0	747410	877207	0
Q8BRN9_T499	Cc2d1b	sp|Q8BRN9|C2D1B_MOUSE	Q8BRN9	KPAQtLVSPSHLLTEPK	0.8859	0	0	0	0	0.25	0	0	0	0.3183	0	0	0	0	0	0	0	0	0	0	0	93170.2	0	107600	201489	200719	162017	85622.3	87969.8	141821	41958.1	0	0	0	0	0	127566	209518	0	116313	260292	93170.2	0	107600	201489
Q8BS90_S47	Bora	sp|Q8BS90|BORA_MOUSE	Q8BS90	MQITPETPGRIPVLNPFESPSDYSNLHEQTLASPSIFKstK	0.8171	0	0	0	0	0.8171	0	0	0	0	0	0	0	0	0	0	0	0	0	0	0	608183	1.03702e+06	945047	6.84616e+06	1.48192e+06	0	0	0	0	0	0	0	0	0	0	0	0	0	0	0	608183	1.03702e+06	945047	6.84616e+06
Q8BS90_T48	Bora	sp|Q8BS90|BORA_MOUSE	Q8BS90	MQITPETPGRIPVLNPFESPSDYSNLHEQTLASPSIFKstK	0.8171	0	0	0	0	0.8171	0	0	0	0	0	0	0	0	0	0	0	0	0	0	0	608183	1.03702e+06	945047	6.84616e+06	1.48192e+06	0	0	0	0	0	0	0	0	0	0	0	0	0	0	0	608183	1.03702e+06	945047	6.84616e+06
Q8BTI8_S1204	Srrm2	sp|Q8BTI8|SRRM2_MOUSE	Q8BTI8	sEQPLSQVLPSLSPEHK	0.922	0	0	0	0.25	0	0	0	0	0.25	0.7802	0	0	0	0	0	0	0.25	0	0.25	0.25	0	0	0	252581	0	191934	0	144637	169729	182966	435013	0	255298	0	0	0	266349	255304	321414	236091	0	0	0	252581
Q8BTI8_S1216	Srrm2	sp|Q8BTI8|SRRM2_MOUSE	Q8BTI8	SEQPLSQVLPSLsPEHK	0.9298	0	0.8787	0	0.9249	0	0	0	0	0	0	0	0	0	0	0	0	0	0	0	0	0	193973	0	252581	0	0	0	0	0	0	0	0	0	0	0	0	0	0	0	0	0	193973	0	252581
Q8BTI8_S1305	Srrm2	sp|Q8BTI8|SRRM2_MOUSE	Q8BTI8	NSGPVSEVNTGFsPEVK	0.8821	0.6583	0	0	0	0.762	0	0	0	0	0	0	0	0	0	0	0	0	0	0	0	288159	0	0	0	365403	0	0	0	0	0	0	0	0	0	0	0	0	0	0	0	288159	0	0	0
Q8BTI8_S1832	Srrm2	sp|Q8BTI8|SRRM2_MOUSE	Q8BTI8	sRsRtPLISR	0.9038	0	0	0	0	0	0	0	0	0	0	0	0	0	0	0	0	0	0	0	0	81173.6	364793	0	0	0	0	0	0	0	0	0	0	0	0	0	0	0	0	0	0	81173.6	364793	0	0
Q8BTI8_S1834	Srrm2	sp|Q8BTI8|SRRM2_MOUSE	Q8BTI8	sRsRtPLISR	0.9038	0	0	0	0	0	0	0	0	0	0	0	0	0	0	0	0	0	0	0	0	81173.6	364793	0	0	0	0	0	0	0	0	0	0	0	0	0	0	0	0	0	0	81173.6	364793	0	0
Q8BTI8_S2224	Srrm2	sp|Q8BTI8|SRRM2_MOUSE	Q8BTI8	TPAAAAAMNLAsPR	0.9228	0.5997	0.6029	0.9134	0.7674	0.9109	0.6955	0	0.6929	0.8337	0	0	0	0	0	0	0	0	0	0	0	138204	409287	153388	347731	249175	243310	0	182075	270821	0	0	0	0	0	0	271862	265528	316145	347943	256286	140300	205589	144217	167804
Q8BTI8_S310	Srrm2	sp|Q8BTI8|SRRM2_MOUSE	Q8BTI8	IHTTALtGQSPPLASGHQGEGDAPsVEPGATNIQQPSSPAPSTK	0.7796	0	0	0	0	0.7796	0	0	0	0	0	0	0	0	0	0	0	0	0	0	0	0	0	0	0	819404	0	0	0	0	0	0	0	0	0	0	0	0	0	0	0	0	0	0	0
Q8BTI8_T1302	Srrm2	sp|Q8BTI8|SRRM2_MOUSE	Q8BTI8	NSGPVSEVNtGFSPEVK	0.8743	0	0	0.4675	0	0	0	0	0	0	0	0	0	0	0	0	0	0	0	0	0	0	0	293265	0	0	0	0	0	0	0	0	0	0	0	0	0	0	0	0	0	0	0	293265	0
Q8BTI8_T1836	Srrm2	sp|Q8BTI8|SRRM2_MOUSE	Q8BTI8	sRsRtPLISR	0.9038	0	0	0	0	0	0	0	0	0	0	0	0	0	0	0	0	0	0	0	0	81173.6	364793	0	0	0	0	0	0	0	0	0	0	0	0	0	0	0	0	0	0	81173.6	364793	0	0
Q8BTI8_T2213	Srrm2	sp|Q8BTI8|SRRM2_MOUSE	Q8BTI8	tPAAAAAMNLASPR	0.9148	0	0.7166	0.8386	0.8564	0.7751	0	0.759	0	0	0.5	0	0	0	0	0	0	0	0	0	0	0	409287	262487	183318	249175	0	228816	0	0	271620	0	0	0	0	0	148033	0	0	0	0	0	205063	263955	184342
Q8BTI8_T2537	Srrm2	sp|Q8BTI8|SRRM2_MOUSE	Q8BTI8	RVPSPtPVPK	0.8647	0	0	0	0	0	0	0	0	0	0	0	0	0	0	0	0	0	0	0	0	0	248785	0	0	0	0	0	0	0	0	0	0	0	0	0	0	271941	175944	0	0	0	248785	0	0
Q8BTI8_T292	Srrm2	sp|Q8BTI8|SRRM2_MOUSE	Q8BTI8	IHTTALtGQSPPLASGHQGEGDAPsVEPGATNIQQPSSPAPSTK	0.7842	0	0	0	0	0.7842	0	0	0	0	0	0	0	0	0	0	0	0	0	0	0	0	0	0	0	819404	0	0	0	0	0	0	0	0	0	0	0	0	0	0	0	0	0	0	0
Q8BTM8_S1084	Flna	sp|Q8BTM8|FLNA_MOUSE	Q8BTM8	AFGPGLQGGNAGsPAR	1	0	0	0	1	1	0	0	0	0	0	0	0	0	0	0	0	0	0	0	0	94199.2	230921	126828	0	384166	0	0	0	0	0	0	0	0	0	0	0	0	0	0	0	102454	251158	137942	0
Q8BX22_S117	Sall4	sp|Q8BX22|SALL4_MOUSE	Q8BX22	AALsHQLGSPSNK	0.8285	0.3333	0.3333	0	0	0.3333	0	0	0	0	0	0	0	0	0	0	0	0	0	0	0	259082	412912	484203	0	373589	0	0	0	0	0	0	0	0	0	0	0	0	0	0	0	259082	412912	484203	0
Q8C079_S335	Strip1	sp|Q8C079|STRP1_MOUSE	Q8C079	AAsPPASASDLIEQQQK	0.9326	0.3333	0	0	0	0.3333	0	0	0	0.3333	0	0	0	0	0	0	0	0.4	0	0	0.3333	191332	366330	281745	230280	293910	126189	232412	154785	235791	146652	0	0	0	252628	0	0	241610	0	0	262320	191332	366330	281745	230280
Q8C0D4_S584	Arhgap12	sp|Q8C0D4|RHG12_MOUSE	Q8C0D4	VLSSTINNQVAEADEAAEEETPDsPGVEK	0.9266	0.9156	0	0.9266	0	0.8762	0	0.662	0	0	0	0	0	0	0	0	0	0	0	0	0	727320	0	831898	0	934816	0	348657	0	285720	438237	0	0	0	0	0	0	343311	0	371293	489901	727320	0	0	0
Q8C0D4_T228	Arhgap12	sp|Q8C0D4|RHG12_MOUSE	Q8C0D4	AttPPNQGRPDSPVYANLQELK	0.9128	0.7182	0	0	0.9128	0.8834	0	0	0	0	0	0	0	0	0	0	0	0	0	0	0	752843	761373	1.20091e+06	898976	732894	0	0	0	0	0	0	0	0	0	0	0	229786	625841	0	0	472733	437195	643416	480135
Q8C0D4_T229	Arhgap12	sp|Q8C0D4|RHG12_MOUSE	Q8C0D4	AttPPNQGRPDSPVYANLQELK	0.9128	0.7182	0	0	0.9128	0.8834	0	0	0	0	0	0	0	0	0	0	0	0	0	0	0	752843	761373	1.20091e+06	898976	732894	0	0	0	0	0	0	0	0	0	0	0	229786	625841	0	0	472733	437195	643416	480135
Q8C0D4_T565	Arhgap12	sp|Q8C0D4|RHG12_MOUSE	Q8C0D4	VLSStINNQVAEADEAAEEETPDSPGVEK	0.8643	0.8643	0	0	0	0	0	0	0	0	0	0	0	0	0	0	0	0	0	0	0	727320	0	0	0	0	0	0	0	0	0	0	0	0	0	0	0	0	0	0	0	727320	0	0	0
Q8C0D4_T581	Arhgap12	sp|Q8C0D4|RHG12_MOUSE	Q8C0D4	VLSSTINNQVAEADEAAEEEtPDSPGVEK	0.8992	0.2377	0.4576	0.4731	0.4764	0.4656	0	0	0.323	0.4292	0	0	0	0	0	0	0.3587	0	0.2698	0	0	727320	639817	1.4347e+06	852102	934816	434731	0	233244	285720	0	0	0	0	0	0	408312	0	441521	0	0	727320	639817	1.4347e+06	852102
Q8C0J2_S287	Atg16l1	sp|Q8C0J2|A16L1_MOUSE	Q8C0J2	sVSSIPVPQDIMDTHPASGK	0.9049	0.3287	0.766	0.3279	0.3272	0.3284	0.2	0.3222	0.3241	0.3282	0.3252	0	0	0.2	0.2	0	0.3174	0.819	0.5111	0.3284	0	2.02812e+06	1600843	2.23142e+06	790890	1.92014e+06	754755	740425	771247	830795	707830	0	636510	700271	539556	438518	986533	1809924	887023	1.04418e+06	0	1.29087e+06	1.00643e+06	1.08866e+06	982536
Q8C0J2_S304	Atg16l1	sp|Q8C0J2|A16L1_MOUSE	Q8C0J2	SVSSIPVPQDIMDTHPAsGK	0.8077	0	0	0	0	0	0.6168	0.8077	0	0	0	0	0	0	0	0	0.2895	0	0	0	0	0	0	0	0	0	754755	740425	0	0	0	0	0	0	0	0	986533	0	0	0	0	0	0	0	0
Q8C0J2_T247	Atg16l1	sp|Q8C0J2|A16L1_MOUSE	Q8C0J2	EPLPVEQDDDIEVIVDEtSDHTEETSPVR	0.7907	0	0	0	0.7907	0.2	0	0	0	0.2	0.2	0	0	0	0	0	0	0	0	0	0	0	0	0	2.07819e+06	1.44545e+06	2610170	1.62423e+06	1.66059e+06	1.19341e+06	1.33689e+06	0	0	0	717060	461595	0	1.54205e+06	3450506	1.70083e+06	0	0	0	0	2.07819e+06
Q8C0J2_T251	Atg16l1	sp|Q8C0J2|A16L1_MOUSE	Q8C0J2	EPLPVEQDDDIEVIVDETSDHtEETSPVR	0.9057	0.3228	0	0	0	0	0	0.3099	0	0	0	0	0	0	0	0	0	0	0	0	0	764693	0	1.0445e+06	0	0	0	1.62423e+06	0	0	1.33689e+06	0	0	0	0	0	1.08327e+06	0	0	0	1.81157e+06	764693	0	1.0445e+06	0
Q8C0J2_T300	Atg16l1	sp|Q8C0J2|A16L1_MOUSE	Q8C0J2	SVSSIPVPQDIMDtHPASGK	0.9175	0	0	0.245	0	0.8223	0	0	0	0	0	0	0.4729	0	0	0	0	0	0.3294	0.4591	0.4502	0	0	882732	0	1.15741e+06	0	0	0	0	0	501255	762145	0	0	0	191578	206107	422832	1.04418e+06	901066	0	0	882732	0
Q8C156_T43	Ncaph	sp|Q8C156|CND2_MOUSE	Q8C156	APLGtPKtPVLEDFPQNDDEK	1	1	1	1	1	1	0	0	0	0	1	0	0	0	0	0	0	1	1	1	1	201976	207933	325906	295571	221340	0	212731	167001	207341	212256	0	0	0	0	0	196194	275313	314626	272907	268618	201976	207933	325906	295571
Q8C156_T46	Ncaph	sp|Q8C156|CND2_MOUSE	Q8C156	APLGtPKtPVLEDFPQNDDEK	1	1	1	1	1	1	0	0	0	0	1	0	0	0	0	0	0	1	1	1	1	201976	207933	325906	295571	221340	0	212731	167001	207341	212256	0	0	0	0	0	196194	275313	314626	272907	268618	201976	207933	325906	295571
Q8C1B2_S34	Tiparp	sp|Q8C1B2|PARPT_MOUSE	Q8C1B2	ISEKIsPLK	0.7954	0	0	0	0	0.7954	0	0	0	0	0	0	0	0	0	0	0	0	0	0	0	83831.4	104985	105676	85991.7	114809	0	0	0	0	0	0	0	0	0	0	0	0	0	0	0	83831.4	104985	105676	85991.7
Q8C790_S239	Fam221a	sp|Q8C790|F221A_MOUSE	Q8C790	AMHAPsTSSPQPLAGGNEVGPSTQLSSLR	0.7811	0	0	0.2351	0.7811	0	0	0	0	0	0	0	0	0	0	0	0	0	0	0	0	0	0	164158	0	202867	0	0	0	0	0	0	0	0	0	0	0	0	0	0	0	0	0	164158	0
Q8C790_S242	Fam221a	sp|Q8C790|F221A_MOUSE	Q8C790	AMHAPSTSsPQPLAGGNEVGPSTQLSSLR	0.7726	0	0	0	0	0.7726	0	0	0	0	0	0	0	0	0	0	0	0	0	0	0	0	0	164158	0	202867	0	0	0	0	0	0	0	0	0	0	0	0	0	0	0	0	0	164158	0
Q8C7E7_S137	Stbd1	sp|Q8C7E7|STBD1_MOUSE	Q8C7E7	NQsPGSHGGEWR	0.9087	0	0	0.5	0.5	0	0	0	0	0	0	0	0	0	0	0	0	0	0	0	0	116198	0	239143	112306	201159	0	0	0	0	0	0	0	0	0	0	0	0	0	0	0	116198	0	239143	112306
Q8C7E7_S60	Stbd1	sp|Q8C7E7|STBD1_MOUSE	Q8C7E7	GAPPGEAAAPGDGPGGGGsGGLSPEPSDR	0.86	0.4773	0.4814	0.4553	0.3333	0.4287	0	0	0	0	0	0	0	0	0	0	0	0	0	0	0	354533	378553	470277	500109	483958	0	0	0	0	0	0	0	0	0	0	0	0	0	0	0	354533	378553	470277	500109
Q8C9S4_S754	Ccdc186	sp|Q8C9S4|CC186_MOUSE	Q8C9S4	IsAEDRSPENTSSSVAVDNFPEVDK	0.7881	0.225	0.1667	0.1667	0	0	0	0	0	0	0	0	0	0	0	0	0	0	0	0	0	237959	279005	313222	342660	0	0	0	0	0	0	0	0	0	0	0	0	0	0	0	0	237959	279005	313222	342660
Q8C9S4_S759	Ccdc186	sp|Q8C9S4|CC186_MOUSE	Q8C9S4	ISAEDRsPENTSSSVAVDNFPEVDK	0.8796	0	0	0	0	0.8796	0	0	0	0	0	0	0	0	0	0	0	0	0	0	0	0	0	0	0	367248	0	0	0	0	0	0	0	0	0	0	0	0	0	0	0	0	0	0	0
Q8CG76_S40	Akr7a2	sp|Q8CG76|ARK72_MOUSE	Q8CG76	AAsGAPLRPATVLGTMEMGR	0.847	0	0	0	0	0.4462	0	0	0	0	0	0	0	0	0	0	0	0	0	0	0	71463.4	131939	0	0	305806	50035.6	71126.7	0	0	0	0	0	0	0	0	0	166609	0	170214	0	71463.4	131939	0	0
Q8CGC4_S115	Lsm14b	sp|Q8CGC4|LS14B_MOUSE	Q8CGC4	AQHTLPQDPAIVQSSLGSASASPFQPHVPYsPFR;AQHTLPQDPAIVQSSLGSASASPFQPHVPysPFR;AQHtLPQDPAIVQSSLGSASASPFQPHVPYsPFR	0.8613	0	0	0	0.4775	0	0	0.578	0.3651	0.5912	0	0	0	0	0	0	0	0.7019	0.8148	0.3204	0	0	0	0	2.60557e+06	0	0	1.51549e+06	2783239	2118954	0	0	0	0	0	0	0	2.66748e+06	3.95191e+06	1.64301e+06	0	0	0	0	2.60557e+06
Q8CGC4_S154	Lsm14b	sp|Q8CGC4|LS14B_MOUSE	Q8CGC4	sPMVEQAVQTSSVDNLNAK	0.9071	0.88	0.8838	0.325	0.25	0.25	0.25	0.25	0.2695	0	0.25	0	0	0	0	0	0.8687	0.7809	0.3447	0.25	0.25	525894	1238784	586023	266233	195693	533010	521194	207569	241054	260328	0	0	0	0	0	260969	1.0912e+06	381855	877740	411338	351213	384541	389073	163689
Q8CGC4_S165	Lsm14b	sp|Q8CGC4|LS14B_MOUSE	Q8CGC4	SPMVEQAVQTSsVDNLNAK	0.8257	0	0	0	0	0.495	0	0	0	0	0	0	0	0	0	0	0	0	0	0	0	0	0	0	0	211251	0	0	0	0	0	0	0	0	0	0	0	0	0	0	0	0	0	0	0
Q8CGC4_S98	Lsm14b	sp|Q8CGC4|LS14B_MOUSE	Q8CGC4	AQHTLPQDPAIVQsSLGSASASPFQPHVPYSPFR;AQHTLPQDPAIVQssLGSASASPFQPHVPYSPFR	0.8154	0	0	0	0.2842	0	0	0	0.3717	0.28	0.8154	0	0	0	0	0	0.2834	0	0.775	0.3153	0.2828	0	0	0	1.48387e+06	0	0	0	2673385	1338892	1.8837e+06	0	0	0	0	0	2.02125e+06	0	2.53537e+06	1.49802e+06	1.83351e+06	0	0	0	845605
Q8CGC4_S99	Lsm14b	sp|Q8CGC4|LS14B_MOUSE	Q8CGC4	AQHTLPQDPAIVQssLGSASASPFQPHVPYSPFR	0.775	0	0	0	0.2842	0	0	0	0.3717	0.28	0.2839	0	0	0	0	0	0.2834	0	0.775	0.3153	0.2828	0	0	0	981218	0	0	0	1.41027e+06	1338892	1.22521e+06	0	0	0	0	0	2.02125e+06	0	2.53537e+06	1.49802e+06	1.83351e+06	0	0	0	981218
Q8CGC4_T163	Lsm14b	sp|Q8CGC4|LS14B_MOUSE	Q8CGC4	SPMVEQAVQtSSVDNLNAK	0.8281	0	0	0	0	0.329	0	0	0	0	0	0	0	0	0	0	0	0	0	0	0	0	0	0	899888	0	0	0	0	0	0	0	0	0	0	0	0	0	0	0	0	0	0	0	899888
Q8CGC4_T88	Lsm14b	sp|Q8CGC4|LS14B_MOUSE	Q8CGC4	AQHtLPQDPAIVQSSLGSASASPFQPHVPYSPFR;AQHtLPQDPAIVQSSLGSASASPFQPHVPYsPFR	0.8517	0	0	0	0.1629	0	0.3137	0	0.4327	0	0.125	0	0	0	0	0	0	0	0	0	0.125	0	0	0	221438	0	474114	0	690609	0	508348	0	0	0	0	0	0	0	0	0	459401	0	0	0	242954
Q8CGC4_Y114	Lsm14b	sp|Q8CGC4|LS14B_MOUSE	Q8CGC4	AQHTLPQDPAIVQSSLGSASASPFQPHVPysPFR	0.8405	0	0	0	0.4775	0	0	0.578	0.3651	0.5912	0	0	0	0	0	0	0	0.7019	0.8148	0.3204	0	0	0	0	2.60557e+06	0	0	831668	2783239	2118954	0	0	0	0	0	0	0	2.66748e+06	3.95191e+06	1.64301e+06	0	0	0	0	2.60557e+06
Q8CHC4_S1175	Synj1	sp|Q8CHC4|SYNJ1_MOUSE	Q8CHC4	NQPsPQAGLAGPGPAGYGAAR	0.8736	0.8736	0	0.8326	0	0.5866	0	0	0	0	0	0	0	0	0	0	0	0	0	0	0	61441.4	98833.9	88869.2	0	0	0	0	0	0	0	0	0	0	0	0	0	0	0	0	0	61441.4	98833.9	88869.2	0
Q8CHC4_T1075	Synj1	sp|Q8CHC4|SYNJ1_MOUSE	Q8CHC4	tPGPPSSQGSPVDTQPAAQK	0.7746	0.2	0.2	0	0	0.2	0	0	0	0	0	0	0	0	0	0	0	0	0	0	0	331157	286099	362119	223004	308425	0	0	0	0	0	0	0	0	0	0	0	0	0	0	0	331157	286099	362119	223004
Q8CHW4_S540	Eif2b5	sp|Q8CHW4|EI2BE_MOUSE	Q8CHW4	AGsPQLDDIR	1	1	1	1	0	1	0	0	0	0	1	0	1	0	0	0	1	1	0	0	1	314200	608960	181198	176569	197545	43516.8	81591.1	0	109010	0	0	456085	0	0	0	0	412348	179882	341038	378146	176032	335825	197845	94702.6
Q8CIE6_S173	Copa	sp|Q8CIE6|COPA_MOUSE	Q8CIE6	NLsPGAVESDVR	0.9426	0.9312	0.9411	0.9345	0.9416	0.9426	0.5	0	0.5	0	0	0	0	0	0	0	0	0.5	0	0.8794	0	873218	1.01866e+06	1225113	1.40392e+06	1.71961e+06	131342	0	0	0	0	0	0	0	0	0	262705	337799	547816	337020	377751	873218	1.01866e+06	854651	1061963
Q8CIE6_S179	Copa	sp|Q8CIE6|COPA_MOUSE	Q8CIE6	NLSPGAVEsDVR	0.9361	0	0	0	0	0	0	0	0	0	0	0	0	0	0	0	0	0	0.7864	0	0	0	0	0	0	0	0	83566.3	101524	0	0	0	0	0	0	0	0	0	547816	0	0	0	0	0	0
Q8CIG3_S12	Kdm1b	sp|Q8CIG3|KDM1B_MOUSE	Q8CIG3	sNLELSPDNLPLR	0.8168	0	0	0	0	0.5	0	0	0	0	0.7027	0	0	0	0	0	0.5	0.5	0	0.5	0.8168	0	0	0	0	0	0	221971	208175	186669	0	0	0	0	0	0	0	202646	0	0	268992	0	0	0	0
Q8JZQ9_S111	Eif3b	sp|Q8JZQ9|EIF3B_MOUSE	Q8JZQ9	GHPsAGAEEEGGSDGSAAEAEPR;GHPsAGAEEEGGsDGsAAEAEPR	1	0.3333	1	0.3333	0.3333	0.3333	0	0	0	0	0	0	0	0	0	0	0	0	0	0	0	0	85468.9	119923	61550.6	79867.2	0	0	0	0	0	0	0	0	0	0	0	0	0	0	0	0	85468.9	119923	61550.6
Q8K019_S177	Bclaf1	sp|Q8K019|BCLF1_MOUSE	Q8K019	KAEGEPQEEsPLK	1	0	0	0	0	1	0	0	0	0	0	0	0	0	0	0	0	0	0	0	0	106954	141255	82646.6	0	100873	0	0	0	0	0	0	0	0	0	0	0	0	0	0	0	106954	141255	82646.6	0
Q8K019_S656	Bclaf1	sp|Q8K019|BCLF1_MOUSE	Q8K019	IDIsPSALR	0.9147	0	0	0	0	0.5	0	0.5	0	0	0	0	0	0	0	0	0	0	0	0	0	0	0	100387	0	69745.3	72384.2	79135	59191.2	70033.7	80186.2	0	0	0	0	103481	69675.3	0	0	0	112330	0	0	100387	0
Q8K1M6_S607	Dnm1l	sp|Q8K1M6|DNM1L_MOUSE	Q8K1M6	sKPIPIMPASPQK	0.9194	0.5757	0.5	0.5	0.5	0.5	0.5	0.5	0.5	0.8492	0.5	0	0.7546	0	0.5	0.5678	0.5	0.5	0.5	0.5	0.5	1.42488e+06	1.25471e+06	1888649	406820	833729	870448	755873	900793	1.18518e+06	736214	0	2.05495e+06	0	516509	1.01031e+06	1.26479e+06	1.73069e+06	805501	1.42763e+06	1.32893e+06	819299	619578	681283	481175
Q8K1M6_S616	Dnm1l	sp|Q8K1M6|DNM1L_MOUSE	Q8K1M6	PIPIMPAsPQK;SKPIPIMPAsPQK	1	0.939	0.9232	0.9319	0.9375	1	0.9069	0.6295	0.9045	0.9022	0.8611	0.928	0	0.8909	0.8961	0.9348	0.8254	0.9192	0.9305	0.9359	0.9327	1.42688e+06	1246871	1.95328e+06	1.08996e+06	1.39016e+06	870448	755873	900793	1.18518e+06	904202	563430	0	1059905	516509	1.01031e+06	1.26479e+06	1.94175e+06	1021323	1.62535e+06	1.32893e+06	706636	670587	696581	509636
Q8K212_S23	Pacs1	sp|Q8K212|PACS1_MOUSE	Q8K212	GsGVAQsPQQQPQQQPPQPQQPTPPK	0.8062	0	0	0	0	0.8062	0	0	0	0	0	0	0	0	0	0	0	0	0	0.6667	0	0	0	0	0	346379	0	0	199556	0	0	0	0	0	0	0	0	273796	499016	292172	246666	0	0	0	0
Q8K212_S28	Pacs1	sp|Q8K212|PACS1_MOUSE	Q8K212	GSGVAQsPQQQPQQQPPQPQQPtPPK;GsGVAQsPQQQPQQQPPQPQQPTPPK	0.8549	0	0	0	0	0.8043	0	0.8549	0	0	0	0	0	0	0	0	0	0	0	0.6667	0	0	0	0	0	346379	209410	258425	531269	209990	0	0	0	0	0	0	0	273796	499016	292172	246666	0	0	0	0
Q8K212_T44	Pacs1	sp|Q8K212|PACS1_MOUSE	Q8K212	GSGVAQSPQQQPQQQPPQPQQPtPPK;GSGVAQsPQQQPQQQPPQPQQPtPPK	0.8954	0	0	0	0	0	0	0.855	0	0	0	0	0	0	0	0	0	0	0	0	0	0	0	0	0	0	209410	258425	331713	209990	0	0	0	0	0	0	0	0	0	0	0	0	0	0	0
Q8K2C9_S114	Hacd3	sp|Q8K2C9|HACD3_MOUSE	Q8K2C9	WLDEsDAEMELR	1	0	0	1	0	0	0	0	0	0	0	0	0	0	0	0	0	0	0	0	0	0	0	120615	0	98198.9	0	0	0	0	0	0	0	0	0	0	0	0	0	0	0	0	0	120615	0
Q8K2F8_S192	Lsm14a	sp|Q8K2F8|LS14A_MOUSE	Q8K2F8	sPTMEQAVQTASAHLPAPAPVGR	0.8775	0	0	0.8775	0	0	0	0	0	0	0	0	0	0	0	0	0	0	0	0	0	127716	0	309711	255725	181341	0	0	0	0	0	0	0	0	0	0	0	0	0	0	0	127716	0	309711	255725
Q8K2F8_T194	Lsm14a	sp|Q8K2F8|LS14A_MOUSE	Q8K2F8	SPtMEQAVQTASAHLPAPAPVGR	0.8707	0	0	0	0	0.6039	0	0	0	0	0	0	0	0	0	0	0	0	0	0	0	185227	0	413026	276891	385263	126414	101960	0	0	192184	0	0	0	0	0	0	0	0	0	0	185227	0	413026	276891
Q8K2K6_T177	Agfg1	sp|Q8K2K6|AGFG1_MOUSE	Q8K2K6	GtPSQSPVVGR	0.8269	0	0	0	0	0	0	0	0	0	0.3333	0	0	0	0	0	0	0	0	0	0	0	148980	0	0	0	0	123684	177173	0	0	0	0	0	0	0	0	0	176401	0	0	0	148980	0	0
Q8K330_S88	Ssh3	sp|Q8K330|SSH3_MOUSE	Q8K330	GQGLQsPWK	1	0	0	0	0	1	0	0	0	0	0	0	0	0	0	0	0	0	0	0	0	100773	100073	98830.8	0	88114.4	0	0	0	0	0	0	0	0	0	0	0	0	0	0	0	100773	100073	98830.8	0
Q8K3V4_S218	Padi6	sp|Q8K3V4|PADI6_MOUSE	Q8K3V4	GsSAYELVVGPNK;GsSAYELVVGPNKPVYLLPTFENR	0.9348	0.491	0.9255	0.9281	0.3764	0.9331	0.4868	0.482	0.3333	0.8476	0.4904	0.4894	0.4877	0.8492	0.3333	0.4892	0.9294	0.3333	0.4881	0.4788	0.4848	3.52909e+06	3.78831e+06	2.81035e+06	5773016	7220013	4709607	4.05503e+06	3.57473e+06	3.10198e+06	2995617	5707674	4654870	5836679	3.90906e+06	3606401	4561358	5045126	7.30197e+06	4376588	1.74964e+06	6.12371e+06	6573512	4876538	3643354
Q8K3V4_S219	Padi6	sp|Q8K3V4|PADI6_MOUSE	Q8K3V4	GSsAYELVVGPNK	0.8383	0	0	0	0	0	0	0	0	0	0.4843	0	0	0	0	0	0	0	0	0	0	0	0	0	0	0	0	0	0	0	905278	0	0	0	0	0	0	0	0	0	0	0	0	0	0
Q8K3V4_S386	Padi6	sp|Q8K3V4|PADI6_MOUSE	Q8K3V4	YTLTPGsGYLIR	0.9043	0.4753	0.4695	0.4582	0.4746	0.4763	0	0	0	0.467	0	0	0	0	0	0	0	0	0.8129	0.9043	0	3144334	1.16564e+06	1.52441e+06	1.96934e+06	97195.9	0	0	0	1.05862e+06	0	0	0	0	0	0	0	0	3373643	5484034	0	1.65545e+06	1.067e+06	1.88957e+06	2.44108e+06
Q8K3V4_S53	Padi6	sp|Q8K3V4|PADI6_MOUSE	Q8K3V4	ILIHIsSSVIAGK	0.7579	0	0	0	0	0	0	0	0	0	0	0	0	0	0	0	0	0	0	0	0	0	0	0	195591	0	0	0	0	0	0	0	0	0	0	0	0	0	0	0	0	0	0	0	195591
Q8K3V4_S83	Padi6	sp|Q8K3V4|PADI6_MOUSE	Q8K3V4	MVAPsPTVDEDK	0.9411	0.5	0.9221	0.5	0.5	0.9353	0.5	0.9241	0	0.5	0.5	0	0	0	0	0	0.5	0.9152	0.8881	0.9411	0.5	720529	1.10558e+06	1.00835e+06	277712	1.48411e+06	261323	284451	339295	439017	745950	0	0	0	0	0	315343	317226	648541	1.47156e+06	1.26822e+06	456323	373331	383118	301675
Q8K3V4_T236	Padi6	sp|Q8K3V4|PADI6_MOUSE	Q8K3V4	GSSAYELVVGPNKPVYLLPtFENR	0.9145	0	0	0	0	0	0	0	0	0	0	0	0	0	0	0	0	0	0	0.8348	0.8128	0	0	0	0	0	0	0	0	0	0	0	0	0	0	0	0	258406	0	3.57397e+06	4.42075e+06	0	0	0	0
Q8K3V4_T383	Padi6	sp|Q8K3V4|PADI6_MOUSE	Q8K3V4	YTLtPGSGYLIR	0.9367	0	0.8203	0.3269	0	0.8923	0	0	0.3284	0.9193	0.4608	0	0	0	0	0	0.3281	0.8429	0	0.4747	0.3135	0	1.16564e+06	1.77283e+06	3.43141e+06	7942953	0	0	993081	891144	1.23295e+06	0	0	0	0	0	4.18387e+06	4677005	0	2181282	2338643	0	1.10382e+06	1.67881e+06	3249438
Q8K3V4_T85	Padi6	sp|Q8K3V4|PADI6_MOUSE	Q8K3V4	MVAPSPtVDEDK	0.9191	0	0	0	0	0	0	0	0.8548	0.9191	0	0	0	0	0	0	0	0	0	0	0	0	0	0	0	0	0	0	0	439017	0	0	0	0	0	0	0	0	0	0	0	0	0	0	0
Q8K3V4_Y221	Padi6	sp|Q8K3V4|PADI6_MOUSE	Q8K3V4	GSSAyELVVGPNK;GSSAyELVVGPNKPVYLLPTFENR	0.9081	0	0.7753	0.8096	0.8647	0.8522	0	0	0.8081	0	0	0	0	0	0	0	0.8271	0.8441	0.7405	0.8029	0	0	3.78831e+06	2.81035e+06	2.11131e+06	4656872	0	0	1267467	0	0	0	0	0	0	0	1.43081e+06	2.12103e+06	1.74182e+06	802621	0	0	3.78831e+06	2.81035e+06	2.11131e+06
Q8K3V4_Y232	Padi6	sp|Q8K3V4|PADI6_MOUSE	Q8K3V4	GSSAYELVVGPNKPVyLLPTFENR	0.9131	0	0	0.4745	0.4704	0	0.7908	0.4539	0.8798	0	0.8613	0	0	0	0	0	0	0	0	0	0.4448	0	0	1786264	3.66171e+06	0	3.34725e+06	2.58351e+06	2.30727e+06	0	2.09034e+06	0	0	0	0	0	0	0	0	0	4.42075e+06	0	0	1786264	3.66171e+06
Q8K3V4_Y388	Padi6	sp|Q8K3V4|PADI6_MOUSE	Q8K3V4	YTLTPGSGyLIR	0.9246	0.896	0	0	0	0.8962	0	0	0	0	0	0	0	0	0	0	0	0	0	0	0	1.42194e+06	0	0	0	3.06869e+06	0	0	0	0	0	0	0	0	0	0	0	0	0	0	0	1.42194e+06	0	0	0
Q8K4R9_S328	Dlgap5	sp|Q8K4R9|DLGP5_MOUSE	Q8K4R9	SYQVAPLsPR	0.9354	0	0.9318	0.912	0.9222	0.9341	0.7208	0	0	0	0	0	0.9256	0	0.9136	0	0.8991	0	0	0.8962	0.9199	0	453529	365199	0	512399	244689	0	0	0	0	0	321757	0	156584	157431	222559	0	0	291362	369309	0	445478	358716	0
Q8K4R9_S66	Dlgap5	sp|Q8K4R9|DLGP5_MOUSE	Q8K4R9	ELGNIHETsQDLsPEK;ELGNIHEtsQDLSPEK	0.8525	0	0.8525	0.6667	0.6667	0	0	0	0	0	0	0	0	0	0	0	0	0	0	0	0	429146	0	437710	0	363956	0	0	0	0	0	0	0	0	0	0	0	0	0	0	0	429146	0	437710	0
Q8K4R9_S70	Dlgap5	sp|Q8K4R9|DLGP5_MOUSE	Q8K4R9	ELGNIHETSQDLsPEK;ELGNIHETsQDLsPEK	0.9278	0	0.8525	0	0.8262	0.8855	0.7103	0	0	0	0	0	0	0	0	0	0	0	0	0	0	223623	227656	239248	297890	484040	255951	0	0	325467	0	0	0	0	177597	0	0	0	0	345565	272975	223623	227656	239248	297890
Q8K4R9_T65	Dlgap5	sp|Q8K4R9|DLGP5_MOUSE	Q8K4R9	ELGNIHEtsQDLSPEK	0.7961	0	0	0.6667	0.6667	0	0	0	0	0	0	0	0	0	0	0	0	0	0	0	0	429146	0	437710	0	363956	0	0	0	0	0	0	0	0	0	0	0	0	0	0	0	429146	0	437710	0
Q8K4Z5_S320	Sf3a1	sp|Q8K4Z5|SF3A1_MOUSE	Q8K4Z5	FGEsEEVEMEVESDEEDQEK	0.856	0	0	0	0	0.856	0	0	0	0	0	0	0	0	0	0	0	0	0	0	0	0	0	0	0	95755.6	0	0	0	0	0	0	0	0	0	0	0	0	0	0	0	0	0	0	0
Q8N7N5_S100	Dcaf8	sp|Q8N7N5|DCAF8_MOUSE	Q8N7N5	GHGHsDEEDEEQPR	1	1	1	1	1	1	1	1	1	1	1	1	1	1	1	1	1	1	1	1	0	486074	239006	695953	629961	773988	790662	1.11429e+06	1153038	1.14597e+06	972604	2.86593e+06	3546323	101918	938534	1.05011e+06	886349	1.17243e+06	1163174	1.47124e+06	68818.4	257391	193688	437110	514751
Q8N9S3_S189	Ahsa2	sp|Q8N9S3|AHSA2_MOUSE	Q8N9S3	LQAsPVALGVR	1	0	1	0	0	1	1	1	1	1	1	0	0	0	0	0	1	1	1	1	1	0	92162.2	0	0	100449	237286	228935	265414	193993	207348	0	0	0	0	0	224305	333113	390372	357258	295411	0	92162.2	0	0
Q8QZY3_T16	Dppa3	sp|Q8QZY3|DPPA3_MOUSE	Q8QZY3	VDPMKDPEtPQKK	1	1	1	0	1	0	0	0	0	0	0	0	0	0	0	0	0	0	0	0	0	964044	875526	325064	801964	1.33773e+06	71818.6	1.42082e+06	537984	992408	357825	0	0	0	0	0	911180	1.99789e+06	692215	303890	91023.2	552916	471356	337690	313609
Q8QZY3_T29	Dppa3	sp|Q8QZY3|DPPA3_MOUSE	Q8QZY3	DPETPQKKDEEDALDDtDVLQPETLVK	0.878	0	0	0	0.7503	0	0	0	0	0	0	0	0	0	0	0	0	0	0	0	0.4486	194228	0	0	810225	0	0	182144	202514	215305	333019	0	0	0	0	0	322704	325053	445536	388319	355923	194228	0	0	810225
Q8R001_S194	Mapre2	sp|Q8R001|MARE2_MOUSE	Q8R001	sHHANSPTAGAAK	0.8635	0.6007	0.3333	0.4902	0.3333	0.3333	0	0	0	0	0	0	0	0	0	0	0	0	0	0	0	337183	266230	418483	523276	419560	0	0	0	0	0	0	0	0	0	0	0	0	161754	0	0	337183	266230	418483	523276
Q8R001_S199	Mapre2	sp|Q8R001|MARE2_MOUSE	Q8R001	SHHANsPTAGAAK	0.8899	0.4389	0.4602	0.4805	0.8899	0.4856	0	0	0	0	0	0	0	0	0	0	0	0	0	0	0	337183	266230	379080	523276	419560	0	0	0	0	0	0	0	0	0	0	0	0	0	0	0	337183	266230	379080	523276
Q8R001_T201	Mapre2	sp|Q8R001|MARE2_MOUSE	Q8R001	SHHANSPtAGAAK	0.7679	0.5283	0	0	0	0.7679	0	0	0	0	0	0	0	0	0	0	0	0	0	0	0	337183	0	0	0	302397	0	0	0	0	0	0	0	0	0	0	0	0	0	0	0	337183	0	0	0
Q8R010_T39	Aimp2	sp|Q8R010|AIMP2_MOUSE	Q8R010	TTSPAtDAGHVQETSEPSLQALESR	0.8088	0	0	0	0.5322	0	0	0	0	0	0	0	0	0	0	0	0	0	0	0	0	0	0	0	1.05968e+06	0	0	0	0	0	0	0	0	0	0	0	0	0	0	0	0	0	0	0	0
Q8R080_S476	Gtse1	sp|Q8R080|GTSE1_MOUSE	Q8R080	LQsWTPASR	0.9136	0.3333	0	0.3333	0.9136	0.4889	0	0	0	0	0	0	0	0	0	0	0	0	0	0	0	64259.7	208540	125642	97978.6	132783	0	0	0	0	0	0	0	0	0	0	0	0	0	0	0	64259.7	208540	125642	97978.6
Q8R080_T107	Gtse1	sp|Q8R080|GTSE1_MOUSE	Q8R080	EVAQAAtPQNPVNQGK	1	1	1	1	1	1	0	0	0	0	0	0	0	0	0	0	1	1	1	1	0	233696	572760	262735	220278	231552	0	0	0	0	0	0	0	0	0	0	0	0	536289	355464	0	233696	572760	262735	220278
Q8R1B4_S39	Eif3c	sp|Q8R1B4|EIF3C_MOUSE	Q8R1B4	QPLLLsEDEEDTK	0.9349	0.5	0.5	0.5	0	0.8744	0.8586	0.5	0	0	0.8789	0	0.8968	0.5	0.9236	0	0.5	0.5	0.5	0.8544	0.8865	335595	376109	417592	439116	622636	521397	404220	553711	293274	393020	568606	645422	488173	303531	362233	466554	620743	454110	432112	680121	335595	376109	417592	439116
Q8R1G6_S87	Pdlim2	sp|Q8R1G6|PDLI2_MOUSE	Q8R1G6	SQTAsPGQTNGEGSLEVLATR	0.786	0	0	0	0	0	0	0	0	0	0.1761	0	0	0	0	0	0	0	0.786	0	0	0	0	0	0	0	0	0	0	0	238814	0	0	0	0	0	0	0	470994	0	0	0	0	0	0
Q8R1G6_T276	Pdlim2	sp|Q8R1G6|PDLI2_MOUSE	Q8R1G6	ALAtPPK	1	0	0	0	0	0	0	1	1	1	1	0	0	0	0	0	0	0	0	1	0	0	0	0	0	0	0	0	183838	232811	244291	0	0	0	0	0	0	165871	179436	165010	0	0	0	0	0
Q8R1Q8_S207	Dync1li1	sp|Q8R1Q8|DC1L1_MOUSE	Q8R1Q8	DFQEYVEPGEDFPAsPQR;DFQEYVEPGEDFPAsPQRR	0.9359	0.822	0	0.6623	0.9359	0.9096	0	0.7971	0	0	0	0	0	0	0	0	0	0	0	0	0	266870	0	668800	597163	760660	590401	713647	0	544521	607326	0	0	0	0	394268	664154	0	0	0	0	272862	0	683816	610571
Q8R1Q8_S412	Dync1li1	sp|Q8R1Q8|DC1L1_MOUSE	Q8R1Q8	sVSSNVASVSPIPAGSK	0.782	0	0.199	0.1667	0	0.1667	0.3261	0.1924	0.2718	0.1667	0.1992	0	0	0	0	0	0.2989	0	0.1667	0.1667	0.1989	0	1593003	1.36377e+06	0	1.53861e+06	1.2852e+06	1.46325e+06	1.32909e+06	1.19423e+06	0	0	0	0	0	0	1.72649e+06	0	3.40641e+06	1370709	1.33139e+06	0	1593003	1.36377e+06	0
Q8R1Q8_S421	Dync1li1	sp|Q8R1Q8|DC1L1_MOUSE	Q8R1Q8	SVSSNVASVsPIPAGSK	0.8998	0	0.4488	0.7353	0	0	0	0	0.453	0.8834	0	0	0	0	0	0	0	0.8998	0	0.8431	0	0	1593003	1.36377e+06	0	0	0	0	1.32909e+06	1.19423e+06	0	0	0	0	0	0	0	2.2465e+06	0	1370709	0	0	1593003	1.36377e+06	0
Q8R1Q8_S427	Dync1li1	sp|Q8R1Q8|DC1L1_MOUSE	Q8R1Q8	SVSSNVASVSPIPAGsK	0.9038	0.8607	0	0	0	0	0	0	0	0	0	0	0	0	0	0	0	0	0	0	0	727054	0	0	0	0	0	0	0	0	0	0	0	0	0	0	0	0	0	0	0	727054	0	0	0
Q8R1Q8_Y197	Dync1li1	sp|Q8R1Q8|DC1L1_MOUSE	Q8R1Q8	DFQEyVEPGEDFPASPQR	0.7731	0	0	0	0	0	0	0	0	0	0	0	0	0	0	0	0	0	0	0	0	0	0	0	0	136740	0	0	0	0	0	0	0	0	0	0	0	0	0	0	0	0	0	0	0
Q8R4R6_S66	Nup35	sp|Q8R4R6|NUP35_MOUSE	Q8R4R6	sPLLAGGsPPQPVVPAHK	1	0	0	1	0	0	0	0	0	0	0	0	0	0	0	0	0	0	0	0	0	111599	115201	189380	0	87491.5	0	0	0	0	0	0	0	0	0	0	0	0	0	0	0	111599	115201	189380	0
Q8R4R6_S73	Nup35	sp|Q8R4R6|NUP35_MOUSE	Q8R4R6	sPLLAGGsPPQPVVPAHK	1	0	0	1	0	0	0	0	0	0	0	0	0	0	0	0	0	0	0	0	0	111599	115201	189380	0	87491.5	0	0	0	0	0	0	0	0	0	0	0	0	0	0	0	111599	115201	189380	0
Q8R550_S274	Sh3kbp1	sp|Q8R550|SH3K1_MOUSE	Q8R550	sIEVENDFLPVEK	1	1	1	1	1	1	0	0	1	0	1	0	0	0	0	0	1	0	1	1	0	316174	0	0	334100	0	0	0	0	0	0	0	0	0	0	0	0	288573	387718	452754	372841	316174	0	0	334100
Q8R550_S388	Sh3kbp1	sp|Q8R550|SH3K1_MOUSE	Q8R550	PPPPsAPVVK	1	0	0	0	0	0	0	0	0	0	0	0	0	0	0	0	0	0	0	0	0	0	0	0	412444	0	0	0	0	0	0	0	0	0	0	0	0	0	0	0	0	0	0	0	412444
Q8R5H1_S229	Usp15	sp|Q8R5H1|UBP15_MOUSE	Q8R5H1	sPGASNFSTLPK	0.9383	0.917	0.922	0.25	0	0.25	0.25	0.25	0.446	0.7404	0.4702	0	0	0	0.25	0.25	0.8716	0.9205	0	0.25	0.9173	454922	596719	395721	332829	406050	231671	280236	357309	266778	239120	0	0	0	132962	192245	216413	270292	249706	309632	251132	454922	596719	395721	332829
Q8R5H1_S242	Usp15	sp|Q8R5H1|UBP15_MOUSE	Q8R5H1	IsPSSLSNNYNNINNR	0.7578	0.2477	0.4593	0.2	0.3267	0.7578	0	0.2471	0.3261	0	0.2	0	0	0	0	0	0	0.2	0.3088	0.322	0	785494	642269	692308	450603	611292	0	0	0	0	198883	0	0	0	0	0	0	232689	453137	0	0	785494	642269	692308	450603
Q8VBT9_S193	Aspscr1	sp|Q8VBT9|ASPC1_MOUSE	Q8VBT9	APGsPVSSLSADQASSSTLLPLNSGEFSR	0.93	0.2449	0.3203	0.9154	0.1415	0.8913	0.5341	0.2451	0.3102	0.2899	0.3213	0.869	0.646	0.2062	0.899	0.9121	0.4284	0.8382	0.4684	0.2949	0.2418	2.79114e+06	793476	4.53425e+06	2.93044e+06	5855677	3.39802e+06	2.17027e+06	4.02786e+06	1.60292e+06	2.3106e+06	4.42091e+06	5528302	3.36289e+06	4320246	2019899	3137181	5301638	4444845	4558235	2.70489e+06	1.52054e+06	903537	2.44451e+06	3.33692e+06
Q8VBT9_S204	Aspscr1	sp|Q8VBT9|ASPC1_MOUSE	Q8VBT9	APGSPVSSLSADQAsSSTLLPLNSGEFSR	0.7999	0	0	0	0	0	0	0.1459	0	0	0	0	0	0	0	0	0.2211	0	0.4601	0	0.1616	0	0	0	0	0	0	1.87266e+06	0	0	0	0	0	0	0	0	2.59928e+06	0	4444845	0	0	0	0	0	0
Q8VBT9_S213	Aspscr1	sp|Q8VBT9|ASPC1_MOUSE	Q8VBT9	APGSPVSSLSADQASSSTLLPLNsGEFSR	0.9098	0	0	0	0	0.293	0	0.5236	0.4664	0	0	0	0.8377	0	0.456	0	0	0	0.9098	0	0	0	0	0	0	5855677	0	1.87266e+06	1.99977e+06	0	0	0	2.88644e+06	0	1.74659e+06	0	0	0	8306215	0	0	0	0	0	0
Q8VBT9_S217	Aspscr1	sp|Q8VBT9|ASPC1_MOUSE	Q8VBT9	APGSPVSSLSADQASSSTLLPLNSGEFsR	0.9162	0.3999	0	0	0	0	0	0	0	0	0	0	0	0	0.3873	0	0	0.7917	0	0	0	1.44179e+06	0	0	0	0	0	0	0	0	0	0	0	0	2.57365e+06	0	0	2.56521e+06	0	0	0	3.11314e+06	0	0	0
Q8VBT9_S273	Aspscr1	sp|Q8VBT9|ASPC1_MOUSE	Q8VBT9	LGGPSAsLRPLTSPSANSSK	0.7591	0	0	0	0	0	0	0.2869	0	0	0	0	0	0	0	0	0	0	0	0	0	0	0	0	0	0	0	584424	0	0	0	0	0	0	0	0	0	0	0	0	0	0	0	0	0
Q8VBT9_T229	Aspscr1	sp|Q8VBT9|ASPC1_MOUSE	Q8VBT9	GDLNHEGDANtSGTGLEGGPKPTDAQTK	0.853	0	0	0.2434	0.3211	0.853	0	0	0.3128	0	0.2	0	0	0	0	0	0	0.3233	0	0.3209	0	0	0	663651	838609	561612	0	353096	0	0	353065	0	0	0	0	0	0	813390	0	759778	0	0	0	663651	838609
Q8VBT9_T241	Aspscr1	sp|Q8VBT9|ASPC1_MOUSE	Q8VBT9	GDLNHEGDANTSGTGLEGGPKPtDAQTK	0.813	0	0	0.813	0	0	0.739	0	0	0	0	0	0	0	0	0	0	0	0	0	0	0	448820	663651	0	0	250032	0	0	0	353065	0	0	0	0	0	0	0	0	0	0	0	448820	663651	0
Q8VBT9_T278	Aspscr1	sp|Q8VBT9|ASPC1_MOUSE	Q8VBT9	LGGPSASLRPLtSPSANSSK	0.8272	0.8272	0.2816	0.1986	0.1954	0.1978	0	0	0.1678	0.1895	0	0	0	0	0	0	0	0	0	0	0	610294	601953	657625	961234	655265	0	0	579392	479844	0	0	0	0	0	0	0	0	0	462532	0	610294	601953	657625	961234
Q8VCF0_S157	Mavs	sp|Q8VCF0|MAVS_MOUSE	Q8VCF0	PVQDTQPPESPVENsEQLLQTNSGAVAR	0.7883	0.7883	0	0	0	0	0	0	0	0	0	0	0	0	0	0	0	0	0	0	0	114449	0	0	0	0	0	0	0	0	0	0	0	0	0	0	0	0	0	0	0	114449	0	0	0
Q8VCF0_T147	Mavs	sp|Q8VCF0|MAVS_MOUSE	Q8VCF0	PVQDtQPPESPVENSEQLLQTNSGAVAR	0.8953	0.2	0.2444	0	0.253	0	0	0	0	0	0	0	0	0	0	0	0	0	0.4556	0	0	114449	229988	0	0	0	0	0	0	0	0	0	0	0	0	0	0	0	0	0	0	114449	229988	0	0
Q8VCI5_S35	Pex19	sp|Q8VCI5|PEX19_MOUSE	Q8VCI5	AKPsPEHAPTISAPDASGPQK	0.9128	0.3961	0	0.3217	0.8977	0.8889	0	0	0	0	0	0	0	0	0	0	0	0	0	0	0	240716	0	319937	355314	296840	151709	0	0	72573.7	213600	0	0	0	0	0	217714	180127	0	166402	248521	240716	0	319937	355314
Q8VDF2_S102	Uhrf1	sp|Q8VDF2|UHRF1_MOUSE	Q8VDF2	ERDSELSDSDSGYGVGHsESDK;ERDSELSDSDSGYGVGHsEsDK	0.8343	0.7382	0	0.3336	0.7773	0	0.2995	0.4336	0.3817	0.8343	0	0	0.4072	0	0	0	0.4207	0.4352	0.6695	0.1522	0.391	3.36386e+06	2.62292e+06	4952094	3.68745e+06	104729	2315771	2.93876e+06	1.1054e+06	2.97743e+06	523137	0	2.33642e+06	0	0	0	4.32974e+06	4.52563e+06	1.74911e+06	1.63898e+06	4.12858e+06	2.5756e+06	2.60193e+06	4.91245e+06	2.63715e+06
Q8VDF2_S104	Uhrf1	sp|Q8VDF2|UHRF1_MOUSE	Q8VDF2	DSELSDSDSGYGVGHSEsDK;ERDSELSDSDSGYGVGHSEsDK;ERDSELSDSDSGYGVGHsEsDK	0.8991	0.7382	0	0	0.7773	0	0.821	0	0.3817	0	0.3169	0	0	0	0	0.6989	0	0	0.6695	0	0	657667	0	0	1.12798e+06	176899	2315771	0	304223	0	2.01639e+06	0	0	0	0	504595	0	0	801929	0	0	1.88885e+06	0	0	3.2396e+06
Q8VDF2_S289	Uhrf1	sp|Q8VDF2|UHRF1_MOUSE	Q8VDF2	ERRPLIAsPSQPPPALR;PLIAsPSQPPPALR;RPLIAsPSQPPPALR	0.9419	0.921	0.6797	0.5	0.9419	0.8927	0.5	0.5	0.5	0.8043	0.797	0	0	0	0	0	0.5	0.5	0.5	0.8973	0.5	2.77636e+06	1.38725e+06	4852496	4872679	7012813	484617	537801	210711	287600	387839	309109	175504	291115	151553	0	1.52068e+06	1317948	648604	1.47671e+06	1.51856e+06	950619	677454	2.27263e+06	2.17042e+06
Q8VDF2_S291	Uhrf1	sp|Q8VDF2|UHRF1_MOUSE	Q8VDF2	ERRPLIASPsQPPPALR;RPLIASPsQPPPALR	0.9297	0	0	0	0	0.9044	0.6535	0.7429	0	0	0	0	0	0	0	0	0.605	0	0.5586	0	0	0	526315	0	0	4.47109e+06	484617	265687	0	0	0	251570	0	0	0	227593	595283	0	453325	53367.1	0	0	1.04226e+06	0	0
Q8VDF2_S442	Uhrf1	sp|Q8VDF2|UHRF1_MOUSE	Q8VDF2	VQVsEsGVHR	1	0	0	0	0	0	0	0	0	0	0	0	0	0	0	0	1	0	0	0	0	0	0	0	0	0	0	683330	989068	1.24241e+06	819898	1.73929e+06	2299469	0	0	0	1.55269e+06	1.92521e+06	824111	1608644	1366883	0	0	0	0
Q8VDF2_S444	Uhrf1	sp|Q8VDF2|UHRF1_MOUSE	Q8VDF2	VQVsEsGVHR	1	0	0	0	0	0	0	0	0	0	0	0	0	0	0	0	1	0	0	0	0	0	0	0	0	0	0	683330	989068	1.24241e+06	819898	1.73929e+06	2299469	0	0	0	1.55269e+06	1.92521e+06	824111	1608644	1366883	0	0	0	0
Q8VDF2_S640	Uhrf1	sp|Q8VDF2|UHRF1_MOUSE	Q8VDF2	ALEQGPSSsK	0.925	0	0	0	0.925	0	0	0	0	0	0	0	0	0	0	0	0	0	0	0	0	0	0	0	435131	0	0	0	0	0	0	0	0	0	0	0	0	0	0	0	0	0	0	0	0
Q8VDF2_S649	Uhrf1	sp|Q8VDF2|UHRF1_MOUSE	Q8VDF2	sTGPTLSSPR	0.8439	0.3281	0.2473	0.3175	0.2	0.2	0.3276	0.4329	0.3518	0.2485	0.2	0.2	0.2476	0.247	0.4634	0.2	0.3267	0.2	0.3233	0.2	0.4799	36721832	60398916	48190364	41884844	38208576	20621082	388395	25391020	17548762	22743266	8632065	14536850	5.16207e+06	7.97695e+06	7788889	30113202	37301656	41106132	39300984	2.91595e+06	36721832	60398916	48190364	41884844
Q8VDF2_S655	Uhrf1	sp|Q8VDF2|UHRF1_MOUSE	Q8VDF2	STGPTLsSPR	0.9376	0.485	0.4855	0.4817	0.4842	0.4849	0.4789	0.8319	0.4845	0.4846	0.4827	0.4845	0.4842	0	0	0.4566	0.4833	0.475	0.4808	0.4847	0.3487	36721832	60398916	45137360	41884844	38208576	20621082	20292510	17816314	17154564	22743266	9020112	14536850	0	0	7788889	30113202	37301656	41106132	39300984	2.91595e+06	36721832	60398916	45137360	41884844
Q8VDF2_S656	Uhrf1	sp|Q8VDF2|UHRF1_MOUSE	Q8VDF2	STGPTLSsPR	0.9399	0.9268	0.9381	0.9274	0.9391	0.9385	0.8748	0.9352	0	0.93	0	0	0	0	0	0	0	0.9319	0	0.9191	0	36721832	60398916	45137360	40651584	38208576	20621082	20292510	0	17548762	0	0	0	0	0	0	0	37301656	0	39300984	0	36721832	60398916	45137360	40651584
Q8VDF2_S76	Uhrf1	sp|Q8VDF2|UHRF1_MOUSE	Q8VDF2	QsLALPLSTK	0.9402	0.3333	0.8037	0.7823	0.3333	0.94	0.9132	0	0.8885	0	0.3333	0	0	0	0	0	0.9129	0.9116	0.9185	0.3333	0.9342	800704	1.13251e+06	1.46491e+06	890307	1.8812e+06	177073	186012	209300	186340	191823	0	0	0	0	0	573400	755345	743729	758601	606152	519493	746855	966050	575666
Q8VDF2_S88	Uhrf1	sp|Q8VDF2|UHRF1_MOUSE	Q8VDF2	DsELSDSDSGYGVGHSESDK;ERDsELSDSDSGYGVGHSESDK	0.935	0.4648	0.4322	0.667	0.935	0.4647	0.9162	0.4081	0.678	0.8583	0.6782	0.8749	0.2596	0.2439	0.473	0.8935	0.8418	0.6838	0.3162	0.9308	0.6123	3.60826e+06	3.48234e+06	5.50327e+06	6002516	5.31274e+06	2567780	4528803	2.45526e+06	2.63055e+06	3.39025e+06	7901331	2.6172e+06	3.10494e+06	2.78288e+06	2.59699e+06	4915884	5396159	2.24765e+06	5.01189e+06	5.35282e+06	2.26595e+06	2.26172e+06	3.5908e+06	3.06267e+06
Q8VDF2_S91	Uhrf1	sp|Q8VDF2|UHRF1_MOUSE	Q8VDF2	DSELsDSDSGYGVGHSESDK;ERDSELsDSDSGYGVGHSESDK	0.9256	0.2802	0.4572	0	0.9074	0.508	0	0.7858	0	0.163	0.3218	0.7157	0.4107	0.2452	0.3894	0	0.2433	0.4664	0.6999	0.9256	0	2.70619e+06	3146112	118324	5.83586e+06	5.23663e+06	442012	2.93876e+06	499648	452464	2.01639e+06	4.43463e+06	1.78235e+06	3.10494e+06	2.66053e+06	504595	4180957	4353480	1.26194e+06	3963150	982277	2.68191e+06	3.11789e+06	3351642	5.7835e+06
Q8VDF2_S93	Uhrf1	sp|Q8VDF2|UHRF1_MOUSE	Q8VDF2	ERDSELSDsDSGYGVGHSESDK;ERDSELSDsDsGYGVGHSESDK	0.9135	0.3046	0.401	0.3049	0.7906	0	0	0.8687	0	0.594	0.3057	0.1952	0	0.1907	0.1888	0.3148	0	0.7925	0.2332	0.8046	0	1975601	1.73199e+06	2.03322e+06	5.83586e+06	863928	0	2.93876e+06	0	581572	2.01639e+06	2256358	1.78235e+06	3.70092e+06	1.70404e+06	2.59699e+06	0	3.20269e+06	1.12861e+06	3.71336e+06	0	1.97152e+06	953821	2.02903e+06	5823815
Q8VDF2_S95	Uhrf1	sp|Q8VDF2|UHRF1_MOUSE	Q8VDF2	ERDSELSDSDsGYGVGHSESDK;ERDSELSDSDsGyGVGHSESDK;ERDSELSDsDsGYGVGHSESDK	0.9137	0	0.3349	0.3479	0.2528	0.2318	0	0	0	0.594	0	0.2204	0	0	0	0	0.6842	0	0.5607	0	0	1.21297e+06	1.00332e+06	3.48047e+06	4.39002e+06	1.2994e+06	0	0	0	581572	0	1.36015e+06	0	1.63852e+06	0	0	3.98522e+06	0	1.07282e+06	0	0	1.32469e+06	212135	2.81204e+06	4794368
Q8VDF2_T650	Uhrf1	sp|Q8VDF2|UHRF1_MOUSE	Q8VDF2	StGPTLSSPR	0.8848	0	0	0	0	0	0	0	0.8848	0	0	0.246	0	0	0	0	0	0	0	0.2475	0.4064	0	0	0	0	0	0	0	17816314	0	428320	446431	0	0	0	0	0	313718	0	753262	2.91595e+06	0	0	0	0
Q8VDF2_T653	Uhrf1	sp|Q8VDF2|UHRF1_MOUSE	Q8VDF2	STGPtLSSPR	0.9339	0.3288	0.7011	0.8471	0	0.8975	0.2734	0.3287	0.3287	0.3272	0.9224	0.3286	0.3286	0.3277	0.9297	0.9077	0.8982	0.328	0.8947	0.8886	0.3268	36721832	60398916	48190364	0	36970308	287522	20292510	25391020	17154564	22743266	9020112	14536850	5.16207e+06	7.97695e+06	7788889	30113202	38223972	41969436	39300984	2.91595e+06	36721832	60398916	48190364	0
Q8VDF2_Y97	Uhrf1	sp|Q8VDF2|UHRF1_MOUSE	Q8VDF2	ERDSELSDSDSGyGVGHSESDK;ERDSELSDSDsGyGVGHSESDK	0.8559	0	0.7175	0.3479	0.6229	0	0	0	0	0.2642	0.2002	0.2932	0	0	0.3582	0	0	0.2122	0	0	0	1975601	1.0908e+06	6.1156e+06	5.83586e+06	41437	0	2398327	2125935	2.63055e+06	2.01639e+06	1.36015e+06	999556	0	514286	0	0	4353480	0	0	0	1975601	1.0908e+06	5.16928e+06	5.83586e+06
Q8VDM4_S17	Psmd2	sp|Q8VDM4|PSMD2_MOUSE	Q8VDM4	TPVQSQQPsATTPSGADEK	0.8412	0.8177	0.246	0.2394	0	0	0	0	0	0	0	0	0	0	0	0	0	0	0	0	0.24	493653	536862	436184	0	0	0	0	0	0	0	0	0	0	0	0	0	0	0	0	0	493653	536862	436184	0
Q8VDS7_S45	Cep57l1	sp|Q8VDS7|CE57L_MOUSE	Q8VDS7	MFNsPNNQALVSALK	0.9121	0	0	0.8897	0	0.9121	0	0	0	0	0	0	0	0	0	0	0	0	0	0	0	91626	0	159526	110571	162889	0	0	0	0	0	0	0	0	0	0	0	0	0	0	0	91626	0	159526	110571
Q8VE88_S119	Fam114a2	sp|Q8VE88|F1142_MOUSE	Q8VE88	AETSLGIPsPTEISAEVK	0.8492	0	0	0	0	0	0	0	0.326	0	0	0	0	0	0	0	0	0	0	0.3249	0	141576	191931	269777	301598	0	239872	0	0	270191	311519	0	0	0	0	0	395984	0	0	284129	0	141576	191931	269777	301598
Q8VE88_S2	Fam114a2	sp|Q8VE88|F1142_MOUSE	Q8VE88	sDKDPPESPVVTGVASTLK	0.8471	0	0.2	0.3093	0	0.8271	0	0	0	0	0	0	0	0	0	0	0	0	0.2	0	0	165080	163990	186391	0	144943	0	0	131016	0	0	0	0	0	0	0	0	0	0	0	0	165080	163990	186391	0
Q8VED9_S22	Lgalsl	sp|Q8VED9|LEGL_MOUSE	Q8VED9	LDDGHLNNsLGsPVQADVYFPR	0.8633	0.8633	0	0	0.6816	0.6667	0	0	0	0	0	0	0	0	0	0	0.6667	0	0	0.6667	0	82174.8	0	91842.7	115374	71562.1	0	0	0	0	0	0	0	0	0	0	0	0	0	177520	192935	82174.8	0	91842.7	115374
Q8VED9_S25	Lgalsl	sp|Q8VED9|LEGL_MOUSE	Q8VED9	LDDGHLNNsLGsPVQADVYFPR	0.8633	0.8633	0	0	0.6592	0.6667	0	0	0	0	0	0	0	0	0	0	0.6667	0	0	0.6667	0	82174.8	0	91842.7	115374	71562.1	0	0	0	0	0	0	0	0	0	0	0	0	0	177520	192935	82174.8	0	91842.7	115374
Q8VEL2_S479	Mtmr14	sp|Q8VEL2|MTMRE_MOUSE	Q8VEL2	sHSSSPQSMLWSR;sHSSSPQSMLWSRPQPSEER;sHsSSPQSMLWSRPQPSEER	0.9168	0.4038	0.2471	0.1429	0.8928	0.5586	0	0	0	0	0	0	0	0	0	0	0	0	0	0	0	2.02483e+06	1441098	2.73846e+06	8806357	2.9352e+06	0	0	0	0	0	0	0	0	0	0	0	0	0	0	0	1235277	1.10031e+06	1.58745e+06	1.69465e+06
Q8VEL2_S481	Mtmr14	sp|Q8VEL2|MTMRE_MOUSE	Q8VEL2	sHsSSPQSMLWSRPQPSEER	0.8284	0	0	0	0.8284	0	0	0	0	0	0	0	0	0	0	0	0	0	0	0	0	0	0	0	2.27224e+06	0	0	0	0	0	0	0	0	0	0	0	0	0	0	0	0	0	0	0	0
Q8VEL2_S486	Mtmr14	sp|Q8VEL2|MTMRE_MOUSE	Q8VEL2	SHSSSPQsMLWSR;SHSSSPQsMLWSRPQPSEER	0.8922	0	0	0.6032	0.8922	0.3682	0	0	0	0	0	0	0	0	0	0	0	0	0	0	0	457033	0	2.5946e+06	7137642	326333	0	0	0	0	0	0	0	0	0	0	0	0	0	0	0	331060	0	1.14576e+06	1.91832e+06
Q8VEL2_S490	Mtmr14	sp|Q8VEL2|MTMRE_MOUSE	Q8VEL2	SHSSSPQSMLWsR;SHSSSPQSMLWsRPQPSEER	0.8424	0	0	0.3035	0.7303	0.8082	0	0	0	0	0	0	0	0	0	0	0	0	0	0	0	0	0	504957	2.69511e+06	4943646	0	0	0	0	0	0	0	0	0	0	0	0	0	0	0	0	0	259764	13832942
Q8VEL2_S495	Mtmr14	sp|Q8VEL2|MTMRE_MOUSE	Q8VEL2	SHSSSPQSMLWSRPQPsEER	0.9162	0	0	0.8986	0.9162	0.8487	0	0	0	0	0	0	0	0	0	0	0	0	0	0	0	829163	675530	750624	8382507	5727973	0	0	0	0	0	0	0	0	0	0	0	0	0	0	0	328411	855628	1.22033e+06	4.78887e+06
Q8VEL2_S527	Mtmr14	sp|Q8VEL2|MTMRE_MOUSE	Q8VEL2	MGsSPLEVPK;MGsSPLEVPKPR;MGssPLEVPK;MGssPLEVPKPR	1	1	1	1	0.9119	1	0.9159	0.5	0.5	0.787	0.5	0.5	0.5	0.5	0.5	0.5	0.8755	0.5	0.5	0.5	0.5	10579330	12857066	8365737	5560730	15809319	8733847	7522863	8.09601e+06	7157698	7934785	721872	1.21884e+06	1.55964e+06	943395	1.28275e+06	15090167	16134997	13897840	14271518	14420848	5.98398e+06	6658545	5.58584e+06	3.47608e+06
Q8VEL2_S528	Mtmr14	sp|Q8VEL2|MTMRE_MOUSE	Q8VEL2	MGSsPLEVPK;MGSsPLEVPKPR;MGssPLEVPK;MGssPLEVPKPR	1	1	1	1	0.9032	1	0	0	0.862	0.9255	0.8963	0	0	0	0	0	0.9379	0.8735	0.7518	0.9182	0.8239	845684	13083204	6.30378e+06	3008513	13629507	0	5.48578e+06	2335719	4.41264e+06	2.50648e+06	0	237997	0	0	0	11640612	5600081	525553	9496673	14420848	1281918	4429760	3.85302e+06	1024472
Q8VEL2_S622	Mtmr14	sp|Q8VEL2|MTMRE_MOUSE	Q8VEL2	AATPsPSGAIGGLLEQFAR;AATPsPsGAIGGLLEQFAR;AAtPsPSGAIGGLLEQFAR	0.9427	0.8985	0.4915	0.6667	0.9391	0.6667	0.9254	0	0.6667	0.9028	0.6592	0	0	0.4814	0	0	0.6595	0.6667	0.7445	0.6591	0.6667	3671326	1.18855e+06	4.20802e+06	40940224	472038	7227626	0	3.37144e+06	5909616	3.82127e+06	0	0	1.02754e+06	0	0	13504002	827574	15584772	7794957	7835600	2369617	1.31692e+06	4.66252e+06	13970465
Q8VEL2_S624	Mtmr14	sp|Q8VEL2|MTMRE_MOUSE	Q8VEL2	AATPSPsGAIGGLLEQFAR;AATPsPsGAIGGLLEQFAR	0.9361	0.9361	0.7895	0.9032	0.8876	0.9115	0	0	0.8355	0	0	0	0	0	0	0	0	0.9358	0	0.8775	0	3.34384e+06	1.18855e+06	5193165	16848160	6413825	528801	0	1.04999e+06	0	0	0	0	0	0	0	501687	7622619	0	9879653	1.34926e+06	3317724	1.17926e+06	3.71839e+06	334347232
Q8VEL2_T620	Mtmr14	sp|Q8VEL2|MTMRE_MOUSE	Q8VEL2	AAtPSPSGAIGGLLEQFAR;AAtPsPSGAIGGLLEQFAR	0.9419	0.6808	0.3333	0.6667	0.8864	0.6667	0.9265	0.3333	0.6667	0.9073	0.9137	0.3333	0.4656	0	0.6614	0	0.681	0.9117	0.9034	0.6818	0.9088	5452619	1.18855e+06	5.61571e+06	26201644	7721525	8048401	1.84079e+06	3.88272e+06	5909616	6314000	0	0	0	0	0	13504002	10074665	20305000	10044222	10264726	3.81966e+06	1.34385e+06	4.78636e+06	8826045
Q8VH51_S136	Rbm39	sp|Q8VH51|RBM39_MOUSE	Q8VH51	DKsPVREPIDNLTPEER	0.9373	0	0	0.5	0	0.5	0	0	0	0	0	0	0	0	0	0	0	0	0	0	0	0	94503.4	128457	155619	199426	0	0	0	0	0	0	0	0	0	0	0	0	0	0	0	0	94503.4	128457	155619
Q8VI95_S124	Oas1d	sp|Q8VI95|OAS1D_MOUSE	Q8VI95	FEVQsPKEPNSR	0.9292	0	0.5	0	0.8687	0.8872	0	0	0	0	0	0	0	0	0	0	0	0	0	0	0	93987.4	426489	370066	431767	521822	0	0	0	0	0	0	0	0	0	0	0	0	0	44134.3	0	79971.2	195186	169063	135950
Q8VI95_S130	Oas1d	sp|Q8VI95|OAS1D_MOUSE	Q8VI95	FEVQSPKEPNsR	0.8817	0	0	0	0.8088	0	0	0	0	0	0	0	0	0	0	0	0	0	0	0	0	0	0	0	250955	0	0	0	0	0	0	0	0	0	0	0	0	0	0	0	0	0	0	0	250955
Q8VIH1_S277	Nobox	sp|Q8VIH1|NOBOX_MOUSE	Q8VIH1	VAVTPPLLsPPPIR;VAVtPPLLsPPPIR;VAVtPPLLsPPPIRR	1	0	0	0	0	0	0	1	1	0	0	0	0	0	0	0	0	0	0	0	0	0	0	0	0	0	151190	158708	242876	286627	235434	0	0	0	0	0	182807	0	0	348601	250430	0	0	0	0
Q8VIH1_T272	Nobox	sp|Q8VIH1|NOBOX_MOUSE	Q8VIH1	VAVtPPLLSPPPIR;VAVtPPLLsPPPIR;VAVtPPLLsPPPIRR	1	0	0	0	0	0	0	1	1	0	0	0	0	0	0	0	0	0	0	0	0	0	0	0	0	0	151190	158708	242876	286627	235434	0	0	0	0	0	182807	0	0	348601	250430	0	0	0	0
Q8VIK3_S5	H1.8	sp|Q8VIK3|H18_MOUSE	Q8VIK3	APGsVSSVSSSSFPSR	0.92	0	0	0	0.125	0.125	0	0	0	0	0	0	0	0	0	0	0	0	0	0	0	128473	0	0	127517	135816	0	0	0	0	0	0	0	0	0	0	95597.5	87707.3	0	123715	180797	128473	0	0	127517
Q8VIK3_T278	H1.8	sp|Q8VIK3|H18_MOUSE	Q8VIK3	VPtPSQDIGHK	0.9352	0.9352	0.5	0.5	0.9218	0.5	0	0	0	0	0	0	0	0	0	0	0	0	0	0	0	215948	632594	231155	78084.6	0	0	0	0	0	0	0	0	0	0	0	0	0	0	0	0	248102	336429	228620	77228.3
Q91WK0_S111	Lrrfip2	sp|Q91WK0|LRRF2_MOUSE	Q91WK0	RGsGDTSSLIDPDTSLSELR	0.8416	0	0	0	0	0	0	0	0	0	0	0	0	0	0.2148	0.1429	0	0	0	0	0	0	0	0	0	0	60516.6	0	0	0	0	269200	232500	0	188472	153472	0	0	0	0	0	0	0	0	0
Q91WS7_S14	Depdc7	sp|Q91WS7|DEPD7_MOUSE	Q91WS7	AAALNLsALHSPAQRPPGFSVAQK	0.7866	0	0	0	0	0	0	0	0	0	0	0	0	0	0	0	0	0	0	0	0	0	0	0	0	0	0	0	0	0	0	0	0	0	0	0	0	71881.4	0	0	0	0	0	0	0
Q91X58_S165	Zfand2b	sp|Q91X58|ZFN2B_MOUSE	Q91X58	AQGLASTSTAPSPsR	0.9082	0	0	0	0.9082	0	0	0	0	0	0	0	0	0	0	0	0	0	0	0.7644	0	0	0	0	0	0	0	0	0	0	0	0	0	0	0	0	0	0	0	301582	0	0	0	0	0
Q91YD3_S542	Dcp1a	sp|Q91YD3|DCP1A_MOUSE	Q91YD3	AsSPSPLTVGTAESQR	0.9278	0.2315	0.2709	0.3257	0.1667	0.245	0	0	0	0	0	0	0	0	0	0	0	0	0	0	0	477382	0	1.01984e+06	968104	1.0003e+06	0	0	0	0	0	0	0	0	0	0	0	0	0	0	0	477382	0	1.01984e+06	968104
Q91YD3_S545	Dcp1a	sp|Q91YD3|DCP1A_MOUSE	Q91YD3	ASSPsPLTVGTAESQR	0.8795	0	0	0	0.8066	0.8795	0	0	0	0	0	0	0	0	0	0	0	0	0	0	0	0	0	0	1.00676e+06	1.0003e+06	0	0	0	0	0	0	0	0	0	0	0	0	0	0	0	0	0	0	1.00676e+06
Q91YD3_T420	Dcp1a	sp|Q91YD3|DCP1A_MOUSE	Q91YD3	LRLtPQHDQIQAQPLGK	1	0	0	0	1	0	0	0	0	0	0	0	0	0	0	0	0	0	0	0	0	0	0	0	189756	0	0	0	0	0	0	0	0	0	0	0	0	0	0	0	0	0	0	0	189756
Q91YD3_T449	Dcp1a	sp|Q91YD3|DCP1A_MOUSE	Q91YD3	GTMAPSFSSAAGQLAtPESFIEPSSK	0.8117	0	0	0	0	0	0	0	0	0	0	0	0	0	0	0	0	0	0	0	0	151426	0	0	0	0	0	0	0	0	0	0	0	0	0	0	0	0	0	0	0	151426	0	0	0
Q921M4_S37	Golga2	sp|Q921M4|GOGA2_MOUSE	Q921M4	NsPGVPAGAK	1	0	1	0	0	1	0	0	0	0	0	0	0	0	0	0	0	0	0	0	0	0	100866	0	110207	0	0	0	0	0	0	0	0	0	0	0	0	0	0	0	0	0	100866	0	110207
Q922D8_S549	Mthfd1	sp|Q922D8|C1TC_MOUSE	Q922D8	ITIGQsPTEK	0.9362	0.489	0	0	0	0.9362	0	0	0	0	0	0	0	0	0	0	0	0	0	0	0	222262	459176	0	0	0	0	0	0	0	0	0	0	0	0	0	0	0	0	0	0	222262	459176	0	0
Q99J36_S8	Thumpd1	sp|Q99J36|THUM1_MOUSE	Q99J36	ATTAQQsPQPVAGK	0.9281	0.9281	0.8451	0	0	0.9097	0	0	0	0	0	0	0	0	0	0	0	0	0	0	0	0	725361	0	0	0	0	0	0	0	0	0	0	0	0	0	0	0	0	0	0	0	725361	0	0
Q99J36_S86	Thumpd1	sp|Q99J36|THUM1_MOUSE	Q99J36	DQQPsGsEGEDDDAEAALK	1	1	1	0	1	1	0	0	0	0	0	0	0	0	0	0	0	0	0	0	0	0	364735	322488	0	365069	0	0	0	0	0	0	0	0	0	0	0	0	0	0	0	0	364735	322488	0
Q99J36_S88	Thumpd1	sp|Q99J36|THUM1_MOUSE	Q99J36	DQQPsGsEGEDDDAEAALK	1	1	1	0	1	1	0	0	0	0	0	0	0	0	0	0	0	0	0	0	0	0	364735	322488	0	365069	0	0	0	0	0	0	0	0	0	0	0	0	0	0	0	0	364735	322488	0
Q99JX3_S418	Gorasp2	sp|Q99JX3|GORS2_MOUSE	Q99JX3	ADASSLTVDVTsPASK	0.8587	0	0.8587	0	0.4815	0	0	0	0	0	0	0	0	0	0	0	0	0	0	0	0	0	1.18604e+06	0	1.11885e+06	0	0	0	0	0	0	0	0	0	0	0	0	0	0	0	0	0	1.18604e+06	0	1.11885e+06
Q99JX3_S421	Gorasp2	sp|Q99JX3|GORS2_MOUSE	Q99JX3	ADASSLTVDVTSPAsK	0.807	0	0	0	0.807	0	0	0	0	0	0	0	0	0	0	0	0	0	0	0	0	0	0	0	1.11885e+06	0	0	0	0	0	0	0	0	0	0	0	0	0	0	0	0	0	0	0	1.11885e+06
Q99K01_S736	Pdxdc1	sp|Q99K01|PDXD1_MOUSE	Q99K01	VEQLsSGLEHDNLEAHSPEQPPR	0.81	0.4596	0.468	0.4632	0.81	0.3333	0	0	0	0	0.3333	0	0	0	0	0	0	0.3333	0	0	0.3333	890287	344944	903548	846031	869815	0	251632	0	248227	274891	0	0	0	0	0	0	662873	0	683779	780920	890287	344944	903548	846031
Q99K01_S748	Pdxdc1	sp|Q99K01|PDXD1_MOUSE	Q99K01	VEQLSSGLEHDNLEAHsPEQPPR	0.9153	0.8918	0.4508	0.5863	0.477	0.8739	0	0	0	0	0	0	0	0	0	0	0.3644	0.6559	0.6903	0	0	772702	347532	903548	846031	869815	235085	0	164977	0	0	0	0	0	0	0	529509	662873	266869	0	0	772702	347532	903548	846031
Q99K01_T684	Pdxdc1	sp|Q99K01|PDXD1_MOUSE	Q99K01	VQGtGVTPPPTPLGTR;VQGtGVtPPPTPLGTR	0.8661	0.3092	0.25	0	0.8378	0.5	0	0	0.25	0.4849	0.25	0	0	0	0	0	0	0.4861	0	0.6048	0.594	750558	218480	0	367808	621622	0	0	0	288601	219683	0	0	0	0	0	0	817172	0	587578	802548	752797	219131	0	368905
Q99K01_T687	Pdxdc1	sp|Q99K01|PDXD1_MOUSE	Q99K01	VQGTGVtPPPTPLGTR;VQGtGVtPPPTPLGTR	0.9293	0	0	0	0.9	0.9293	0	0.2938	0	0	0	0	0	0	0	0	0	0	0.4987	0.6048	0.2774	0	0	0	436689	621622	248543	178869	0	0	0	0	0	0	0	0	0	0	784587	207047	802548	0	0	0	436689
Q99K01_T691	Pdxdc1	sp|Q99K01|PDXD1_MOUSE	Q99K01	VQGTGVTPPPtPLGTR	0.8492	0	0.2731	0	0	0	0	0	0	0	0	0	0	0	0	0	0	0	0	0	0	0	218480	0	0	0	0	0	0	0	0	0	0	0	0	0	0	0	0	0	0	0	218480	0	0
Q99K01_T695	Pdxdc1	sp|Q99K01|PDXD1_MOUSE	Q99K01	VQGTGVTPPPTPLGtR	0.8615	0	0	0	0	0	0	0	0	0	0	0	0	0	0	0	0	0.8615	0	0	0	0	0	0	0	0	0	0	0	0	0	0	0	0	0	0	474466	817172	0	0	0	0	0	0	0
Q99KH8_S4	Stk24	sp|Q99KH8|STK24_MOUSE	Q99KH8	AHsPVQSGLPGMQNLK	0.8723	0	0	0	0	0.8287	0	0	0	0	0	0	0	0	0	0	0.5	0.6818	0	0	0	0	0	0	0	169453	0	0	0	0	0	0	0	0	0	0	0	327906	0	300392	0	0	0	0	0
Q99KK2_S11	Cmas	sp|Q99KK2|NEUA_MOUSE	Q99KK2	GAVtsGPAPR	1	0	0	0	1	0	0	0	0	0	0	0	0	0	0	0	0	0	0	0	0	0	0	0	123822	0	0	0	0	0	0	0	0	0	0	0	0	0	0	0	0	0	0	0	0
Q99KK2_T10	Cmas	sp|Q99KK2|NEUA_MOUSE	Q99KK2	GAVtsGPAPR	1	0	0	0	1	0	0	0	0	0	0	0	0	0	0	0	0	0	0	0	0	0	0	0	123822	0	0	0	0	0	0	0	0	0	0	0	0	0	0	0	0	0	0	0	0
Q99L47_S180	St13	sp|Q99L47|F10A1_MOUSE	Q99L47	AIEINPDsAQPYK	0.9095	0	0.5	0	0.9095	0	0	0	0	0	0	0	0	0	0	0	0	0	0	0	0	0	149426	0	444265	173523	0	0	0	0	0	0	0	0	0	0	0	0	0	0	0	0	149426	0	444265
Q99LD4_S454	Gps1	sp|Q99LD4|CSN1_MOUSE	Q99LD4	EGsQGELTPANSQSR	0.9406	0.25	0.9406	0.8	0.8569	0.25	0.6881	0.25	0.25	0	0	0	0	0	0	0	0.9174	0.9165	0.9226	0.9367	0.2829	876467	832326	905095	1.03204e+06	0	255083	249877	335546	0	0	0	237513	0	0	0	715195	855207	988816	797992	0	876467	832326	905095	1.03204e+06
Q99LI2_S429	Clcc1	sp|Q99LI2|CLCC1_MOUSE	Q99LI2	FHsGNKsPEVLR	1	0	0	0	0	0	0	0	0	0	0	0	0	0	0	0	0	0	0	1	0	0	0	0	0	0	0	0	0	0	119125	0	0	0	0	0	163214	224864	162222	133276	168259	0	0	0	0
Q99LI2_S433	Clcc1	sp|Q99LI2|CLCC1_MOUSE	Q99LI2	FHsGNKsPEVLR	1	0	0	0	0	0	0	0	0	0	0	0	0	0	0	0	0	0	0	1	0	0	0	0	0	0	0	0	0	0	119125	0	0	0	0	0	163214	224864	162222	133276	168259	0	0	0	0
Q99M51_S85	Nck1	sp|Q99M51|NCK1_MOUSE	Q99M51	RKPsVPDTASPADDSFVDPGER	0.909	0	0	0	0	0	0.25	0.3825	0.25	0	0.25	0.4225	0.3256	0.25	0.8521	0.4398	0	0	0	0.25	0	0	0	0	0	0	241571	530105	168413	184217	150356	1253068	673896	569483	936841	824463	209610	0	0	193589	0	0	0	0	0
Q99M51_S91	Nck1	sp|Q99M51|NCK1_MOUSE	Q99M51	RKPSVPDTAsPADDSFVDPGER	0.7597	0	0	0	0	0	0	0	0	0	0	0.7597	0	0	0	0	0	0	0	0	0	0	0	0	0	0	0	0	0	0	0	671111	0	0	0	0	0	0	0	0	0	0	0	0	0
Q99M51_S96	Nck1	sp|Q99M51|NCK1_MOUSE	Q99M51	RKPSVPDTASPADDsFVDPGER	0.8885	0	0	0	0	0	0	0	0	0	0.7656	0	0	0.4258	0	0.8713	0.6951	0	0	0	0.3345	0	0	0	0	0	131947	270038	187276	338559	239378	0	0	1.16166e+06	0	347425	187781	260936	0	388305	363769	0	0	0	0
Q99MD9_S188	Nasp	sp|Q99MD9|NASP_MOUSE	Q99MD9	EDMDIsEPEEK;GGREDMDIsEPEEK	1	1	1	1	1	1	0	0	0	0	0	0	0	0	0	0	0	0	0	1	0	808198	1139581	790661	1148324	875094	0	0	0	0	0	0	0	0	0	0	0	0	0	0	0	372169	461785	437752	435682
Q99MD9_S466	Nasp	sp|Q99MD9|NASP_MOUSE	Q99MD9	EGEEtEGsEEEDRENDK;EGEEtEGsEEEDRENDKAEETPNESVLEK	1	0	1	0.8878	1	0.7536	0	0	0	0	0	0	0	0	0	0	0.5	0	0	0.5	0	445372	444934	705800	955551	573042	0	315017	342103	268298	376960	618003	331250	681989	563774	0	433288	647157	411682	363653	346002	445372	444934	705800	955551
Q99MD9_S483	Nasp	sp|Q99MD9|NASP_MOUSE	Q99MD9	AEETPNEsVLEK;EGEETEGSEEEDRENDKAEEtPNEsVLEK	0.9342	0.9247	0.9196	0.8778	0	0.7303	0	0	0	0	0	0	0	0	0	0	0	0	0	0	0	264556	431322	268446	0	236293	0	0	0	0	0	0	0	0	0	0	0	0	0	0	0	264556	431322	268446	0
Q99MD9_T463	Nasp	sp|Q99MD9|NASP_MOUSE	Q99MD9	EGEEtEGSEEEDRENDKAEEtPNESVLEK;EGEEtEGsEEEDRENDK;EGEEtEGsEEEDRENDKAEETPNESVLEK	1	0	1	0.8878	1	0.7536	0	0	0	0	0	0	0	0	0	0	0.5	0	0	0.5	0	445372	444934	705800	955551	573042	0	315017	342103	268298	376960	618003	331250	681989	563774	0	433288	647157	411682	363653	346002	445372	444934	705800	955551
Q99MD9_T479	Nasp	sp|Q99MD9|NASP_MOUSE	Q99MD9	AEEtPNESVLEK;EGEETEGSEEEDRENDKAEEtPNEsVLEK;EGEEtEGSEEEDRENDKAEEtPNESVLEK	0.9194	0	0.5	0.5	0.8913	0	0	0.5	0.5	0	0	0	0	0	0	0	0	0	0.5	0.5	0	0	431322	268446	185085	30166.1	259168	262486	265876	0	254829	0	0	0	0	0	0	238625	356202	340143	293640	0	431322	268446	185085
Q99MR3_S3	Slc12a9	sp|Q99MR3|S12A9_MOUSE	Q99MR3	AsESSPLLAYR	0.8897	0.25	0.3259	0.4479	0.3301	0.8897	0	0	0	0	0	0	0	0	0	0	0	0	0	0.25	0	238396	0	365756	0	368034	0	0	0	0	0	0	0	0	0	0	81893.4	190026	0	160449	0	238396	0	365756	0
Q99MV1_S113	Tdrd1	sp|Q99MV1|TDRD1_MOUSE	Q99MV1	KPPPTGNPVSPLSLGNssPPNQVK	0.8114	0	0	0	0	0	0	0.8114	0	0	0.6897	0	0	0	0	0	0	0	0	0	0	0	0	0	0	0	0	351908	491587	0	433752	0	0	0	0	0	0	0	0	0	403439	0	0	0	0
Q99MV1_S114	Tdrd1	sp|Q99MV1|TDRD1_MOUSE	Q99MV1	KPPPTGNPVSPLSLGNssPPNQVK	0.8134	0	0	0	0	0	0	0.8134	0	0	0.6897	0	0	0	0	0	0	0	0	0	0	0	0	0	0	0	0	351908	491587	0	433752	0	0	0	0	0	0	0	0	0	403439	0	0	0	0
Q99N50_S181	Sytl2	sp|Q99N50|SYTL2_MOUSE	Q99N50	LPEDHSLQQTKPEQsKtGK	0.759	0	0	0	0	0	0	0	0	0	0	0	0	0	0	0	0	0	0	0.759	0	0	0	0	0	0	0	0	0	17504220	0	0	0	0	0	0	16035014	0	0	11014478	9963539	0	0	0	0
Q99N50_T183	Sytl2	sp|Q99N50|SYTL2_MOUSE	Q99N50	LPEDHSLQQTKPEQsKtGK	0.759	0	0	0	0	0	0	0	0	0	0	0	0	0	0	0	0	0	0	0.759	0	0	0	0	0	0	0	0	0	17504220	0	0	0	0	0	0	16035014	0	0	11014478	9963539	0	0	0	0
Q9CPN8_S165	Igf2bp3	sp|Q9CPN8|IF2B3_MOUSE	Q9CPN8	VAYIPDETAAQQNPsPQLR	0.9377	0.7626	0.9184	0.9192	0	0.8209	0	0.9032	0	0	0.9026	0	0	0	0	0	0.5459	0	0	0.8715	0	1.78832e+06	1.57537e+06	2191245	0	1.28847e+06	0	372937	0	0	0	0	0	0	0	0	1.03466e+06	0	0	1.31618e+06	950078	1.78832e+06	1.57537e+06	2191245	0
Q9CPN8_S184	Igf2bp3	sp|Q9CPN8|IF2B3_MOUSE	Q9CPN8	QAsPGSVSK	0.9338	0.3333	0.3333	0.9338	0.3333	0.3333	0	0	0	0	0	0	0	0	0	0	0	0	0	0	0	0	776302	321367	209031	614116	0	0	0	0	0	0	0	0	0	0	0	0	0	0	0	0	776302	321367	209031
Q9CPN8_T158	Igf2bp3	sp|Q9CPN8|IF2B3_MOUSE	Q9CPN8	VAYIPDEtAAQQNPSPQLR	0.8032	0.7044	0	0.6785	0	0	0	0	0	0	0	0	0	0	0	0	0	0	0.4161	0	0.4342	1.78832e+06	0	2191245	0	0	0	0	0	425366	416587	0	0	0	0	0	0	0	1.2094e+06	0	950078	1.78832e+06	0	2191245	0
Q9CPN8_Y153	Igf2bp3	sp|Q9CPN8|IF2B3_MOUSE	Q9CPN8	VAyIPDETAAQQNPSPQLR	0.8933	0.4938	0	0.3333	0.3333	0.3333	0.3333	0	0	0	0	0	0	0	0	0	0.4463	0.3722	0.3333	0	0.8933	1.78832e+06	0	2191245	1.29722e+06	1.28847e+06	524263	0	0	0	0	0	0	0	248835	202371	1.10721e+06	2.00399e+06	1.2094e+06	0	871747	1.78832e+06	0	2191245	1.29722e+06
Q9CQ22_T30	Lamtor1	sp|Q9CQ22|LTOR1_MOUSE	Q9CQ22	LLLDPSSTPtK	0.8764	0	0	0	0.7856	0	0	0.7592	0.855	0	0	0	0.7319	0	0	0	0.4606	0.4429	0	0	0	0	0	0	0	0	0	1.47591e+06	1.97539e+06	0	0	0	592421	0	0	0	976089	2.01526e+06	0	0	0	0	0	0	0
Q9CQ37_S193	Ube2t	sp|Q9CQ37|UBE2T_MOUSE	Q9CQ37	KFsPDVQR	1	1	1	1	1	1	0	0	0	0	0	0	0	0	0	0	0	0	0	0	0	428381	685441	557146	568688	678191	0	0	0	0	0	0	0	0	0	0	0	0	0	0	0	428381	685441	557146	568688
Q9CQC6_S411	Bzw1	sp|Q9CQC6|5MP2_MOUSE	Q9CQC6	NAEEEsEsEAEEGD	1	1	1	0	0	0	0	0	0	0	0	0	0	0	0	0	0	0	0	0	0	0	443212	0	0	0	0	0	0	0	0	0	0	0	0	0	0	0	0	0	0	0	443212	0	0
Q9CQC6_S413	Bzw1	sp|Q9CQC6|5MP2_MOUSE	Q9CQC6	NAEEEsEsEAEEGD	1	1	1	0	0	0	0	0	0	0	0	0	0	0	0	0	0	0	0	0	0	0	443212	0	0	0	0	0	0	0	0	0	0	0	0	0	0	0	0	0	0	0	443212	0	0
Q9CQJ7_S162	Pttg1	sp|Q9CQJ7|PTTG1_MOUSE	Q9CQJ7	LLHLGPPsPLK	1	0	0	0	0	0	0	1	1	1	1	0	0	0	0	0	1	1	0	1	1	0	0	0	0	0	362828	330824	433518	339325	369697	0	0	0	138159	64341.3	536977	582446	333984	475209	664132	0	0	0	0
Q9CQS8_S13	Sec61b	sp|Q9CQS8|SC61B_MOUSE	Q9CQS8	PGPTPSGTNVGsSGRSPSK	0.9079	0	0.4665	0.7748	0.2433	0.2454	0.1868	0	0.7379	0	0	0.3246	0.2065	0	0	0	0.2394	0.396	0.4423	0	0	0	2.98463e+06	4475627	2823488	1.72258e+06	0	0	1759142	0	0	0	2996725	0	0	0	0	763884	3.47423e+06	2.03164e+06	0	0	2.98463e+06	4475627	2823488
Q9CQS8_S14	Sec61b	sp|Q9CQS8|SC61B_MOUSE	Q9CQS8	PGPTPSGTNVGSsGRSPSK	0.85	0	0	0	0.7675	0	0	0	0	0	0	0.3231	0	0.3214	0	0	0	0.85	0	0.2675	0	0	0	0	1.29464e+06	0	0	0	0	0	0	0	0	2.06217e+06	0	0	0	4664033	0	2.03164e+06	0	0	0	0	2.92443e+06
Q9CQS8_S17	Sec61b	sp|Q9CQS8|SC61B_MOUSE	Q9CQS8	PGPTPSGTNVGSSGRsPSK	0.9007	0	0	0	0.8397	0.9007	0	0	0.4198	0.2436	0.2783	0	0.437	0	0	0.8826	0.4538	0	0.4629	0	0	0	3.05834e+06	0	4.11812e+06	1.72258e+06	0	631268	1759142	0	0	0	2996725	0	0	2.2359e+06	1.65189e+06	0	3.47423e+06	2.6591e+06	0	0	2.4448e+06	0	2.49833e+06
Q9CQS8_S19	Sec61b	sp|Q9CQS8|SC61B_MOUSE	Q9CQS8	PGPTPSGTNVGSSGRSPsK	0.9261	0	0	0.9013	0	0	0	0	0	0	0	0	0	0	0	0	0	0	0	0.9261	0	0	0	1.29053e+06	0	0	0	0	0	0	0	0	0	0	0	0	0	0	0	2.95854e+06	0	0	0	1.29053e+06	0
Q9CQS8_S7	Sec61b	sp|Q9CQS8|SC61B_MOUSE	Q9CQS8	PGPTPsGTNVGSSGRSPSK;PGPTPsGtNVGSSGRSPSK	0.9296	0.6519	0	0.1661	0	0.206	0.9296	0	0	0.7538	0	0	0	0	0	0	0.175	0.2348	0	0	0.2055	987641	0	1.29053e+06	0	3.23706e+06	2.65665e+06	0	1.99093e+06	614618	0	0	0	0	0	0	1.65189e+06	3900149	0	0	0	987641	0	1.29053e+06	0
Q9CQS8_T5	Sec61b	sp|Q9CQS8|SC61B_MOUSE	Q9CQS8	PGPtPSGTNVGSSGRSPSK	0.9197	0.1429	0	0	0.1429	0	0	0.564	0	0	0	0	0.1429	0	0	0	0.1429	0	0	0.1951	0	1.3378e+06	0	0	1.29464e+06	0	0	0	0	0	0	0	4.61923e+06	0	0	0	0	0	0	2.03164e+06	0	1.3378e+06	0	0	1.29464e+06
Q9CR00_S126	Psmd9	sp|Q9CR00|PSMD9_MOUSE	Q9CR00	LAsNSPVLPQAFAR	0.867	0.867	0	0.5	0.8522	0.5	0	0	0	0	0	0	0	0	0	0	0	0.5	0	0.5	0	304743	303092	366829	355723	421760	0	0	0	0	0	0	0	0	0	0	153758	166217	0	169739	0	304743	303092	366829	355723
Q9CR00_S128	Psmd9	sp|Q9CR00|PSMD9_MOUSE	Q9CR00	LASNsPVLPQAFAR	0.9225	0.8286	0	0	0	0.9111	0	0	0	0	0	0	0	0	0	0	0	0	0	0	0	715088	0	0	0	1.22242e+06	0	0	0	0	0	0	0	0	0	0	0	0	0	0	0	676112	0	0	0
Q9CR22_S13	Tmem42	sp|Q9CR22|TMM42_MOUSE	Q9CR22	AAGPQSSGAAVsAAAYPDSPVELPAR	0.7855	0	0	0.3134	0	0.3211	0	0	0	0	0	0	0	0	0	0	0	0	0	0	0	0	0	416142	0	557934	0	0	0	0	0	0	0	0	0	0	0	0	0	0	0	0	0	416142	0
Q9CR22_S20	Tmem42	sp|Q9CR22|TMM42_MOUSE	Q9CR22	AAGPQSSGAAVSAAAYPDsPVELPAR	0.9317	0.9253	0.91	0	0.9308	0.9078	0	0	0	0	0	0	0	0	0	0	0	0	0	0	0	317932	0	0	0	557934	0	0	0	0	0	0	0	0	0	0	0	0	0	0	0	317932	0	0	0
Q9CR22_S7	Tmem42	sp|Q9CR22|TMM42_MOUSE	Q9CR22	AAGPQsSGAAVSAAAYPDSPVELPAR	0.885	0	0	0.2046	0	0	0	0	0	0	0	0	0	0	0	0	0	0	0	0	0	0	0	416142	0	0	0	0	0	0	0	0	0	0	0	0	0	0	0	0	0	0	0	416142	0
Q9CR86_S18	Carhsp1	sp|Q9CR86|CHSP1_MOUSE	Q9CR86	SSEPPPPPLQPPTHQTsVGLLDTPR	0.8963	0	0	0	0	0	0	0	0	0	0.3811	0	0	0	0	0	0	0	0.417	0.3554	0	0	0	0	0	0	0	0	0	0	926076	0	0	0	0	0	0	0	3.81966e+06	2.14099e+06	0	0	0	0	0
Q9CR86_S31	Carhsp1	sp|Q9CR86|CHSP1_MOUSE	Q9CR86	DRsPSPLR;DRsPSPLRGNVVPSPLPtR;DRsPSPLRGNVVPsPLPTR;DRsPSPLRGNVVPsPLPtR;DRsPsPLR;DRsPsPLRGNVVPSPLPTR;DRsPsPLRGNVVPSPLPtR;DRsPsPLRGNVVPsPLPTR	1	0.8258	1	1	0.9093	0.8497	0.7593	0.7419	0.9357	0.9353	0.9379	0.9367	0.9093	0.9308	0.9312	0.936	0.9382	0.9441	0.8697	0.9443	0.935	7569169	8228338	6278154	8611514	9243517	4098274	3.69947e+06	3.696e+06	4.11358e+06	4.5198e+06	11712309	6703285	4.62941e+06	7802738	6028993	6.3898e+06	11756636	5169335	6.55148e+06	6.03993e+06	2024909	4893034	2466353	2.57489e+06
Q9CR86_S33	Carhsp1	sp|Q9CR86|CHSP1_MOUSE	Q9CR86	DRSPsPLRGNVVPsPLPtR;DRsPsPLR;DRsPsPLRGNVVPSPLPTR;DRsPsPLRGNVVPSPLPtR;DRsPsPLRGNVVPsPLPTR	1	0.8258	1	1	0.9093	0.7591	0.7562	0	0.9357	0.9353	0.9379	0.9365	0.9093	0.9308	0.9312	0.936	0.9382	0.9441	0.8696	0.9443	0.935	7569169	7842964	6278154	5.77916e+06	5941576	4098274	889197	3.696e+06	4.11358e+06	4.5198e+06	7179185	6703285	3329082	5471194	3.58291e+06	6.3898e+06	11734378	3.35981e+06	6.55148e+06	6.03993e+06	1.87622e+06	4.92198e+06	2285245	1.86235e+06
Q9CR86_S42	Carhsp1	sp|Q9CR86|CHSP1_MOUSE	Q9CR86	DRSPsPLRGNVVPsPLPtR;DRsPSPLRGNVVPsPLPTR;DRsPSPLRGNVVPsPLPtR;DRsPsPLRGNVVPsPLPTR;GNVVPsPLPTR;GNVVPsPLPTRR	0.9449	0.9364	0.9449	0.9342	0.9391	0.9335	0.9377	0.9389	0.9357	0.9415	0.9391	0.9259	0.8234	0.8742	0.8939	0.885	0.9382	0.944	0.9361	0.9443	0.935	8934551	8120452	7151653	8802830	11071572	8437457	7.69212e+06	7364074	8.24734e+06	7.33112e+06	9023230	6289793	4833730	5.31525e+06	2817488	10661842	11894002	11067484	10980841	10746598	3952323	3.80471e+06	3.08764e+06	4.30404e+06
Q9CR86_T14	Carhsp1	sp|Q9CR86|CHSP1_MOUSE	Q9CR86	SSEPPPPPLQPPtHQTSVGLLDTPR	0.7843	0.3175	0	0	0	0	0	0.3002	0	0.2959	0	0	0	0	0	0	0.2432	0.7843	0	0	0	335153	0	0	0	0	0	1.45325e+06	0	1.32025e+06	0	0	0	0	0	0	2.65724e+06	2154657	0	0	0	335153	0	0	0
Q9CR86_T24	Carhsp1	sp|Q9CR86|CHSP1_MOUSE	Q9CR86	SSEPPPPPLQPPTHQTSVGLLDtPR	0.9239	0	0	0	0	0	0.8979	0	0	0	0	0	0	0	0	0	0.8905	0	0.8839	0.9211	0	0	0	0	945364	801861	1.4521e+06	0	0	0	0	0	0	0	0	0	2.65724e+06	2154657	5616569	2.14099e+06	0	0	0	0	945364
Q9CR86_T46	Carhsp1	sp|Q9CR86|CHSP1_MOUSE	Q9CR86	DRSPsPLRGNVVPsPLPtR;DRsPSPLRGNVVPSPLPtR;DRsPSPLRGNVVPsPLPtR;DRsPsPLRGNVVPSPLPtR;GNVVPSPLPtR;GNVVPSPLPtRR	0.9382	0.8678	0	0.6366	0.8842	0.8963	0.9107	0.9377	0.9147	0.5691	0.9084	0	0.9103	0.912	0.9123	0.8441	0	0.9121	0.9182	0.821	0.8973	4.14143e+06	1.33137e+06	1.38489e+06	6.21039e+06	7928846	4.78001e+06	5549495	3889344	2334772	3.65302e+06	1.84404e+06	2.79754e+06	3.62008e+06	3.34722e+06	3561714	0	13808114	6149915	2.22576e+06	3.67507e+06	2.94905e+06	1.75015e+06	1.8205e+06	3035657
Q9CR86_T51	Carhsp1	sp|Q9CR86|CHSP1_MOUSE	Q9CR86	tFSATVR	0.8986	0	0	0	0	0	0	0	0	0	0	0	0	0	0	0	0	0	0	0	0	0	6.25754e+06	3561385	0	0	936403	3.2958e+06	3.52058e+06	2.71735e+06	584023	0	0	0	0	0	0	0	5.51093e+06	0	0	0	6.25754e+06	3561385	0
Q9CRD0_S108	Ociad1	sp|Q9CRD0|OCAD1_MOUSE	Q9CRD0	KLENsPLGEALR	1	0	0	0	1	1	0	0	0	0	0	0	0	0	0	0	0	0	0	0	0	122877	220409	263844	409984	418632	0	0	0	0	0	0	0	0	0	0	0	0	0	0	0	125176	224533	127221	276877
Q9CW46_S14	Raver1	sp|Q9CW46|RAVR1_MOUSE	Q9CW46	AADVSVTHRPPLsPEAEAEAETPETVDR	0.9256	0	0	0	0	0.3154	0	0	0	0	0	0	0	0	0	0	0	0	0	0	0	0	0	0	0	130382	0	0	0	0	0	0	0	0	0	0	0	0	0	0	0	0	0	0	0
Q9CW46_S576	Raver1	sp|Q9CW46|RAVR1_MOUSE	Q9CW46	LLsPIASNR	0.9357	0.5	0.5	0.8403	0.8454	0.9357	0	0	0	0	0	0	0	0	0	0	0	0	0	0	0	171820	251516	243472	0	270631	0	0	0	0	0	0	0	0	0	0	0	0	0	0	0	95763.1	150122	142312	0
Q9CWE6_S14	Ooep	sp|Q9CWE6|OOEP_MOUSE	Q9CWE6	ASHTADADAKPDsDSQK	0.934	0	0.367	0.4854	0.4807	0	0	0	0	0.4385	0	0	0	0	0	0	0	0	0	0	0	0	182119	401131	1.11886e+06	0	0	0	0	0	0	0	0	0	0	0	0	0	0	0	0	0	428947	328248	692871
Q9CWE6_S16	Ooep	sp|Q9CWE6|OOEP_MOUSE	Q9CWE6	ASHTADADAKPDSDsQK	0.9041	0	0.8023	0	0	0	0	0	0	0	0	0	0	0	0	0	0	0	0	0	0	0	185675	0	0	698756	0	0	0	0	0	0	0	0	0	0	0	0	0	0	0	0	185675	0	0
Q9CWE6_S3	Ooep	sp|Q9CWE6|OOEP_MOUSE	Q9CWE6	AsHTADADAKPDSDSQK	0.8478	0.25	0.25	0.456	0.7964	0.4828	0	0	0.25	0	0	0	0	0	0	0	0.25	0.25	0.25	0	0	533484	0	677689	557175	557175	0	219993	140568	151363	0	0	0	0	0	0	270625	415158	289652	0	0	568012	0	365512	593236
Q9CWU5_S151	Khdc3	sp|Q9CWU5|KHDC3_MOUSE	Q9CWU5	EAAPRPAsVK	1	0	1	0	0	0	0	0	0	0	0	0	0	0	0	0	0	0	0	0	0	0	283313	204663	0	148839	0	0	0	0	0	0	0	0	0	0	0	0	0	0	0	0	283313	204663	0
Q9CWU5_S188	Khdc3	sp|Q9CWU5|KHDC3_MOUSE	Q9CWU5	EAAPQQAsVQEEVR	1	0	0	0	0	1	0	0	0	0	0	0	0	0	0	0	0	0	0	0	0	149374	306731	190331	70419.9	186770	0	0	0	0	0	0	0	0	0	0	0	3.61342e+06	510360	0	0	149374	306731	190331	70419.9
Q9CWU5_S349	Khdc3	sp|Q9CWU5|KHDC3_MOUSE	Q9CWU5	EAATQLsPVEATDTSQLAQVK	0.9251	0	0.9249	0.9251	0.4026	0	0	0	0.2277	0	0	0	0	0	0	0	0.7622	0.8745	0	0.8462	0	0	1.4007e+06	1.57304e+06	0	0	0	0	1275755	0	0	0	0	0	0	0	4.17906e+06	4.35802e+06	0	2.14745e+06	0	0	1.4007e+06	1.57304e+06	0
Q9CWU5_S357	Khdc3	sp|Q9CWU5|KHDC3_MOUSE	Q9CWU5	EAATQLSPVEATDTsQLAQVK	0.8203	0	0	0	0	0	0.8203	0	0	0	0.6709	0	0	0	0	0	0	0	0.7232	0	0	0	0	0	0	0	958055	0	0	0	954231	0	0	0	0	0	0	0	3.42537e+06	0	0	0	0	0	0
Q9CWU5_T346	Khdc3	sp|Q9CWU5|KHDC3_MOUSE	Q9CWU5	EAAtQLSPVEATDTSQLAQVK	0.8807	0.3829	0.4833	0.661	0.3816	0.4813	0	0.4746	0.4245	0	0.8255	0	0	0	0	0	0.4705	0.2	0.3666	0.4742	0.8807	880560	1.4007e+06	1.57304e+06	911898	1155719	0	964622	1275755	964611	954231	0	0	0	0	0	4.17906e+06	4.35802e+06	3.42537e+06	2215521	2869333	880560	1.4007e+06	1.57304e+06	911898
Q9CWU5_T356	Khdc3	sp|Q9CWU5|KHDC3_MOUSE	Q9CWU5	EAATQLSPVEATDtSQLAQVK	0.8126	0	0	0	0	0	0	0	0	0.331	0	0	0	0	0	0	0	0	0	0.7836	0	0	0	0	0	0	0	0	0	1.14279e+06	0	0	0	0	0	0	0	0	0	2.14745e+06	0	0	0	0	0
Q9CX66_S177	Nopchap1	sp|Q9CX66|NOPC1_MOUSE	Q9CX66	GKIEILDsPASK;IEILDsPASK;IEILDsPASKK	0.9391	0.9312	0.5	0.9263	0.9337	0.8031	0.6889	0.5	0.9312	0.5	0.8881	0.5	0.7096	0	0.5	0.5	0.5	0.8176	0.9256	0.9353	0.5	1897449	2.75678e+06	1735779	1.60034e+06	2.33073e+06	1.65135e+06	1.58245e+06	1.41654e+06	1.34253e+06	1.28031e+06	1.32683e+06	883143	1.451e+06	916252	836472	1387439	1.62002e+06	1.39642e+06	1618503	1.49555e+06	907775	1.19527e+06	759093	1.09904e+06
Q9CX66_S180	Nopchap1	sp|Q9CX66|NOPC1_MOUSE	Q9CX66	GKIEILDSPAsK;IEILDSPAsK	0.9225	0.8032	0.8328	0.7925	0	0	0.6076	0.8666	0	0	0	0	0	0.8159	0	0	0.7482	0.6883	0.6106	0	0	981724	1656356	521928	0	0	1195134	1.58245e+06	0	0	355374	0	0	1.18307e+06	0	0	648113	333804	433266	0	0	1.38333e+06	978472	564497	0
Q9CX66_S66	Nopchap1	sp|Q9CX66|NOPC1_MOUSE	Q9CX66	MQRsPLLDQVQAFLPQMAQANEK;sPLLDQVQAFLPQMAQANEK	1	1	0	1	1	1	0	1	0	1	1	0	0	0	0	0	0	1	1	1	1	221341	0	202608	1.17795e+06	551089	859564	339945	399202	324118	457491	0	0	0	0	0	351052	784421	624291	462554	397904	241464	0	221029	300754
Q9CYG7_S182	Tomm34	sp|Q9CYG7|TOM34_MOUSE	Q9CYG7	sRVPSAGDVER	0.7655	0	0.5	0	0	0.7503	0	0	0	0	0	0	0	0	0	0	0	0	0	0	0	0	914688	0	860141	866023	0	0	0	0	0	0	0	0	0	0	0	0	0	0	0	0	914688	0	860141
Q9CYG7_S186	Tomm34	sp|Q9CYG7|TOM34_MOUSE	Q9CYG7	SRVPsAGDVER;VPsAGDVER	1	1	0.9176	1	1	1	0	0	0	0	0	0	0	0	0	0	0	0	0	0	0	431865	1.26991e+06	1113668	225727	1.22284e+06	51849.7	0	0	0	0	0	0	0	0	0	92074.2	140445	217869	85361.3	81862.3	388442	305800	233553	197683
Q9CYZ2_S12	Tpd52l2	sp|Q9CYZ2|TPD54_MOUSE	Q9CYZ2	MDSASQDINLNsPNK	0.9294	0.9294	0	0	0.831	0.9248	0	0	0	0	0	0	0	0	0	0	0	0	0	0	0	544402	0	0	0	0	0	0	0	0	0	0	0	0	0	0	0	0	0	0	0	544402	0	0	0
Q9CYZ2_S200	Tpd52l2	sp|Q9CYZ2|TPD54_MOUSE	Q9CYZ2	ENGsDNLPPSPGSGDQTLPDHAPF	0.7819	0.7819	0	0.422	0	0.2668	0	0	0	0	0	0	0	0	0	0	0	0	0	0	0	168761	169778	181669	278897	213320	0	0	0	0	0	0	0	0	0	0	0	0	0	0	0	168761	169778	181669	278897
Q9CYZ2_S209	Tpd52l2	sp|Q9CYZ2|TPD54_MOUSE	Q9CYZ2	ENGSDNLPPSPGsGDQTLPDHAPF	0.7598	0	0	0	0	0.7598	0	0	0	0	0	0	0	0	0	0	0	0	0	0	0	0	201362	0	174595	213320	0	0	0	0	0	0	0	0	0	0	0	0	0	0	0	0	201362	0	174595
Q9CYZ2_S5	Tpd52l2	sp|Q9CYZ2|TPD54_MOUSE	Q9CYZ2	MDSAsQDINLNSPNK	0.9355	0	0	0.8328	0	0	0	0	0	0	0	0	0	0	0	0	0	0	0	0	0	544402	0	671664	0	0	0	0	0	0	0	0	0	0	0	0	0	0	0	0	0	544402	0	671664	0
Q9CZ44_S262	Nsfl1c	sp|Q9CZ44|NSF1C_MOUSE	Q9CZ44	LGsTAPQVLNTSSPAQQAENEAK	0.8394	0.2	0.4204	0.2	0.2	0.2	0.2	0.2	0.3572	0	0.2	0	0	0	0	0	0.4657	0.2	0.2	0.2423	0.2154	1.8475e+06	2.17783e+06	2.42184e+06	2.2762e+06	2.74122e+06	727355	554374	497088	0	506190	0	0	0	0	0	833268	779972	1684158	873201	1.10243e+06	1.8475e+06	2.17783e+06	2.42184e+06	2.2762e+06
Q9CZ44_S272	Nsfl1c	sp|Q9CZ44|NSF1C_MOUSE	Q9CZ44	LGSTAPQVLNTSsPAQQAENEAK	0.8789	0.7409	0	0	0	0	0	0.8085	0	0	0	0	0	0	0	0	0	0	0.8694	0	0	1.8475e+06	0	0	0	0	0	554374	0	0	0	0	0	0	0	0	0	0	1684158	0	0	1.8475e+06	0	0	0
Q9CZ44_T263	Nsfl1c	sp|Q9CZ44|NSF1C_MOUSE	Q9CZ44	LGStAPQVLNTSSPAQQAENEAK	0.838	0	0	0.838	0	0	0	0	0	0	0	0	0	0	0	0	0	0	0	0	0	0	0	2.42184e+06	0	0	0	0	0	0	0	0	0	0	0	0	0	0	0	0	0	0	0	0	0
Q9CZW5_S94	Tomm70	sp|Q9CZW5|TOM70_MOUSE	Q9CZW5	AsPALGSGHHDGSGDSLEMSSLDR	0.9318	0.1667	0	0.1667	0.5907	0	0	0	0	0	0	0	0	0	0	0	0	0	0	0	0	107135	69914.9	168957	345155	133090	0	0	0	0	0	0	0	0	0	0	0	0	0	0	0	107135	69914.9	168957	345155
Q9D0L1_S191	Zbed3	sp|Q9D0L1|ZBED3_MOUSE	Q9D0L1	KQsPGAQVPEPPSPLPLLPK;KQsPGAQVPEPPsPLPLLPK;QsPGAQVPEPPSPLPLLPK	1	1	1	1	1	1	1	1	1	1	1	0.8925	0.9089	0.6465	0.9001	0.5797	1	1	1	1	1	20555292	20967708	34114364	36562428	44694836	10379102	11530906	10645289	9781429	14991420	1.87006e+06	2.63207e+06	2048738	1224423	1.72505e+06	23677558	18351982	15687769	26552512	25433332	7312014	9616556	12764034	16463841
Q9D0L1_S201	Zbed3	sp|Q9D0L1|ZBED3_MOUSE	Q9D0L1	KQSPGAQVPEPPsPLPLLPK;KQsPGAQVPEPPsPLPLLPK;QSPGAQVPEPPsPLPLLPK	1	1	1	1	1	1	1	1	1	1	1	0.6259	0.8621	0.8461	0.7252	0.9298	1	1	1	1	1	20555292	23978034	34704108	36562428	44694836	10528417	10998690	10645289	10418591	14991420	804316	3.17466e+06	2.14285e+06	1.50569e+06	1.04049e+06	24340180	18351982	25641906	26267864	25433332	10396344	11643543	14549874	17379812
Q9D0L1_S218	Zbed3	sp|Q9D0L1|ZBED3_MOUSE	Q9D0L1	EDPDIHDNNsDNDMVTK	0.938	0.9076	0.929	0.9329	0.938	0.9125	0.9243	0.5	0.5	0.5	0.5	0.5	0.6176	0	0.5	0.7097	0.6915	0.5064	0.9309	0.8983	0.5	4.74621e+06	5630495	6.77897e+06	5351046	11835237	2.38827e+06	2802014	2.16299e+06	2.02493e+06	2253350	3.00626e+06	5.8204e+06	1.99792e+06	2208949	1.73054e+06	3.68958e+06	4.37943e+06	3141929	3702304	2.91509e+06	2.77367e+06	3.27911e+06	3965290	2.62598e+06
Q9D0L1_T224	Zbed3	sp|Q9D0L1|ZBED3_MOUSE	Q9D0L1	EDPDIHDNNSDNDMVtK	0.9377	0.9304	0	0.8703	0.8169	0.9363	0.6844	0	0	0	0.5759	0	0	0.6308	0.7215	0	0	0.7072	0	0.6526	0	4.14587e+06	177697	5751122	5351046	9769674	1912879	0	488942	459595	686123	0	0	4.04009e+06	635058	0	0	3.66063e+06	0	2.82678e+06	236084	2581740	510677	3.22507e+06	2.12203e+06
Q9D0L8_S15	Rnmt	sp|Q9D0L8|MCES_MOUSE	Q9D0L8	ASVASDPEsPPGGNEPAAAsGQR	0.8913	0	0	0	0.8913	0	0	0	0	0	0	0	0	0	0	0	0	0	0	0	0	0	134307	0	88811.6	113952	0	0	0	0	0	0	0	0	0	0	0	0	0	0	0	0	134307	0	88811.6
Q9D0L8_S26	Rnmt	sp|Q9D0L8|MCES_MOUSE	Q9D0L8	ASVASDPEsPPGGNEPAAAsGQR	0.8913	0	0	0	0.8913	0	0	0	0	0	0	0	0	0	0	0	0	0	0	0	0	0	134307	0	88811.6	113952	0	0	0	0	0	0	0	0	0	0	0	0	0	0	0	0	134307	0	88811.6
Q9D1E6_S110	Tbcb	sp|Q9D1E6|TBCB_MOUSE	Q9D1E6	YEIsPEAYER	0.9234	0.4802	0.4809	0.4805	0	0.4861	0	0	0.407	0	0	0	0	0	0	0	0.7972	0.9234	0	0.4907	0.483	544559	565281	722087	0	935862	0	0	0	303470	0	0	0	0	0	0	527382	866634	0	435582	508074	544559	565281	722087	0
Q9D1E6_Y107	Tbcb	sp|Q9D1E6|TBCB_MOUSE	Q9D1E6	yEISPEAYER	0.8694	0.8429	0.6437	0.8491	0.4801	0.7646	0	0.3333	0	0	0.3333	0	0	0	0	0	0	0.6154	0.7391	0.4905	0	544559	707313	722087	636423	787130	0	0	0	0	336471	0	0	0	0	0	0	731133	675413	435582	0	544559	707313	722087	636423
Q9D1E6_Y114	Tbcb	sp|Q9D1E6|TBCB_MOUSE	Q9D1E6	YEISPEAyER	0.8774	0.8463	0	0.4627	0	0.3786	0	0	0	0	0	0	0	0	0	0	0	0	0.8774	0	0	544559	0	834961	0	935862	0	0	0	0	0	0	0	0	0	0	0	0	675413	0	0	544559	0	834961	0
Q9D1L0_S41	Chchd2	sp|Q9D1L0|CHCH2_MOUSE	Q9D1L0	RAPAAQPPAAAAPsAVGSPAAAPR	0.8538	0	0	0.5564	0.5	0	0.5	0.5	0.5	0.6735	0.5	0	0	0	0	0	0.665	0.6203	0.5	0.5	0.5	0	145979	201592	253514	0	223686	0	167129	196518	0	0	0	0	0	0	217805	236546	277917	331451	211506	0	145979	201592	253514
Q9D350_S40	Obox1	sp|Q9D350|OBOX1_MOUSE	Q9D350	QsPLVTPGSTTK;QsPLVtPGSTTK	0.9422	0.6626	0.9396	0.4329	0.9391	0.8965	0	0	0	0	0	0	0	0	0	0	0.4779	0	0	0.9356	0	2901918	6.33972e+06	4267366	3.36326e+06	3.71098e+06	0	0	0	0	0	0	0	0	0	0	451798	0	870089	640803	139319	2.14617e+06	4729656	2.94695e+06	2.10313e+06
Q9D350_T44	Obox1	sp|Q9D350|OBOX1_MOUSE	Q9D350	QSPLVtPGSTTK;QsPLVtPGSTTK	0.9345	0.6568	0.9262	0.3918	0.9345	0.3913	0	0	0	0	0	0	0	0	0	0	0	0.2354	0	0	0	1701423	3.21396e+06	1.98477e+06	1.23467e+06	700205	0	0	0	0	0	0	0	0	0	0	0	0	256960	211835	139319	1.16558e+06	2214679	1.35654e+06	838263
Q9D350_T49	Obox1	sp|Q9D350|OBOX1_MOUSE	Q9D350	QSPLVTPGSTtK	0.8091	0	0	0	0.8091	0	0	0	0	0	0	0	0	0	0	0	0	0	0	0	0	0	0	0	404091	0	0	0	0	0	0	0	0	0	0	0	0	0	0	0	0	0	0	0	0
Q9D554_S365	Sf3a3	sp|Q9D554|SF3A3_MOUSE	Q9D554	EEEEEEQIsEsEsEDEENEIIYNPK;TGEEREEEEEEQIsEsEsEDEENEIIYNPK	0.9225	0	0.9225	0	0	0	0	0	0	0	0	0	0	0	0	0	0	0	0	0	0	0	703530	0	0	0	0	0	0	0	0	0	0	0	0	0	0	0	0	0	0	0	391986	0	0
Q9D554_S367	Sf3a3	sp|Q9D554|SF3A3_MOUSE	Q9D554	EEEEEEQIsEsEsEDEENEIIYNPK;TGEEREEEEEEQIsEsEsEDEENEIIYNPK	0.9225	0	0.9225	0	0	0	0	0	0	0	0	0	0	0	0	0	0	0	0	0	0	0	703530	0	0	0	0	0	0	0	0	0	0	0	0	0	0	0	0	0	0	0	391986	0	0
Q9D554_S369	Sf3a3	sp|Q9D554|SF3A3_MOUSE	Q9D554	EEEEEEQIsEsEsEDEENEIIYNPK;TGEEREEEEEEQIsEsEsEDEENEIIYNPK	0.9225	0	0.9225	0	0	0	0	0	0	0	0	0	0	0	0	0	0	0	0	0	0	0	703530	0	0	0	0	0	0	0	0	0	0	0	0	0	0	0	0	0	0	0	391986	0	0
Q9D554_Y378	Sf3a3	sp|Q9D554|SF3A3_MOUSE	Q9D554	EEEEEEQISESESEDEENEIIyNPK	0.7623	0	0.7597	0	0	0	0	0	0	0	0	0	0	0	0	0	0	0	0	0	0	0	333852	0	0	0	0	0	0	0	0	0	0	0	0	0	0	0	0	0	0	0	333852	0	0
Q9D5V6_S33	Syap1	sp|Q9D5V6|SYAP1_MOUSE	Q9D5V6	LsAGAAPSEESPERPVEPTEEQQQQPPTEDPQFLHQAK	0.794	0	0	0	0	0	0	0	0	0	0	0	0	0	0	0	0	0	0	0	0	0	0	0	490296	0	0	0	0	0	0	0	0	0	0	0	0	0	0	0	0	0	0	0	490296
Q9D7E4_S49		sp|Q9D7E4|CS025_MOUSE	Q9D7E4	GAPAQDPVFTALAPEDPPDPsPR	0.7988	0.7465	0	0	0	0	0	0	0	0	0	0	0	0	0	0	0	0	0	0	0	116826	0	0	0	0	0	0	0	0	0	0	0	0	0	0	0	0	0	0	0	116826	0	0	0
Q9D824_S235	Fip1l1	sp|Q9D824|FIP1_MOUSE	Q9D824	AEFTsPPSLFK	0.9336	0.4491	0	0.7509	0	0.4857	0	0	0	0	0	0	0	0	0	0	0	0	0	0	0	416466	0	584472	0	1.0373e+06	0	0	0	0	0	0	0	0	0	0	0	0	0	0	0	406932	0	571092	0
Q9D824_S238	Fip1l1	sp|Q9D824|FIP1_MOUSE	Q9D824	AEFTSPPsLFK	0.8812	0	0	0	0	0	0	0	0	0.581	0	0	0	0	0	0	0	0.4852	0	0	0	0	0	0	0	0	0	0	0	455708	0	0	0	0	0	0	0	708496	0	0	0	0	0	0	0
Q9D824_S479	Fip1l1	sp|Q9D824|FIP1_MOUSE	Q9D824	DHsPTPSVFNSDEER	0.8661	0	0	0.25	0.8661	0.25	0	0	0	0	0	0	0	0	0	0	0	0	0	0	0	0	0	0	195722	199515	0	0	0	0	0	0	0	0	0	0	0	0	0	0	0	0	0	0	195722
Q9D824_T234	Fip1l1	sp|Q9D824|FIP1_MOUSE	Q9D824	AEFtSPPSLFK	0.8047	0.4904	0.3333	0.4883	0.8047	0.4881	0.7205	0.4874	0.3333	0.4886	0.4884	0	0	0	0.3333	0	0.3333	0.8005	0.4815	0.3333	0.4905	577211	471690	707655	871880	1.06935e+06	720315	633959	749157	706458	734537	463747	338501	201293	252288	202858	610383	1.00369e+06	939334	954437	731385	394927	322740	436500	548259
Q9D842_S131	Aplf	sp|Q9D842|APLF_MOUSE	Q9D842	sPVVNLPDK	1	0	1	1	0	1	0	0	0	0	0	0	0	0	0	0	0	0	1	0	0	157285	343369	242721	94145.5	238719	0	0	0	0	0	0	0	0	0	0	0	139884	115093	78139.6	0	80748.2	182866	125649	105868
Q9DBC7_T75	Prkar1a	sp|Q9DBC7|KAP0_MOUSE	Q9DBC7	tDSREDEISPPPPNPVVK	0.884	0	0	0	0	0	0	0	0	0	0	0	0	0	0	0	0	0	0	0	0	0	72049.6	132131	0	126507	0	0	0	0	0	0	0	0	0	0	0	0	0	0	0	0	72049.6	132131	0
Q9DBT5_S38	Ampd2	sp|Q9DBT5|AMPD2_MOUSE	Q9DBT5	SGLGAsPLQSAR	0.8018	0	0	0.4853	0	0	0	0	0	0	0.8018	0	0	0	0	0	0	0	0	0	0	0	266864	118831	0	117091	0	0	0	0	0	0	0	0	0	0	0	0	0	0	0	0	266864	118831	0
Q9DBT5_S42	Ampd2	sp|Q9DBT5|AMPD2_MOUSE	Q9DBT5	SGLGASPLQsAR	0.8595	0	0	0	0.8595	0	0	0	0	0	0	0	0	0	0	0	0	0	0	0	0	0	0	0	111666	56645.6	0	0	0	0	0	0	0	0	0	0	0	0	0	0	0	0	0	0	111666
Q9DBW3_T5	Natd1	sp|Q9DBW3|NATD1_MOUSE	Q9DBW3	AHAtPPSALEQGGPIR	0.937	0	0	0	0.5657	0.5	0	0	0	0.5	0	0	0	0	0	0	0	0	0.5	0	0.5	0	0	156488	0	0	0	0	208465	241759	0	0	0	0	0	0	236993	0	488788	191053	241062	0	0	156488	0
Q9EPL9_T233	Acox3	sp|Q9EPL9|ACOX3_MOUSE	Q9EPL9	DtKTLLPMTGVMVGDIGK	0.7865	0	0	0	0.7865	0	0	0	0	0	0	0	0	0	0	0	0	0	0	0	0	0	0	239481	175642	0	0	0	0	0	0	0	0	0	0	0	0	0	0	0	0	0	0	239481	175642
Q9ES28_S673	Arhgef7	sp|Q9ES28|ARHG7_MOUSE	Q9ES28	KPsDEEFAVR	1	0	0	0	0	0	0	0	0	0	0	0	0	0	0	0	0	0	0	0	0	87900.3	171290	120801	105865	134600	0	0	0	0	0	0	0	0	0	0	0	0	0	0	0	87900.3	171290	120801	105865
Q9EST3_S114	Eif4enif1	sp|Q9EST3|4ET_MOUSE	Q9EST3	EDDLDVVLsPQR;EDDLDVVLsPQRR;VKEDDLDVVLsPQR;VKEDDLDVVLsPQRR	1	1	0	0	1	1	1	1	1	1	1	0	0	0	0	0	1	1	0	1	1	534964	359022	304291	1.33552e+06	421266	767694	675289	553352	593341	649748	226279	141249	196759	354108	149774	514888	865397	581135	679164	683171	213598	174532	139751	251627
Q9EST3_S373	Eif4enif1	sp|Q9EST3|4ET_MOUSE	Q9EST3	LAGLEQAVLsPGQNSGNYFAPIPSEDHAENK	0.8942	0.4643	0.33	0.7896	0.4742	0.3037	0.8942	0.25	0.4355	0.3194	0.3297	0	0	0	0.25	0	0.7796	0.511	0.3293	0.25	0.6761	2557657	390629	2.72475e+06	3613410	1.18002e+06	2.42368e+06	2.40387e+06	2.14432e+06	849236	880857	0	0	0	589814	0	2.98463e+06	2786954	4.64825e+06	943497	3237260	1.67773e+06	645520	1603126	2.32011e+06
Q9EST3_S378	Eif4enif1	sp|Q9EST3|4ET_MOUSE	Q9EST3	LAGLEQAVLSPGQNsGNYFAPIPSEDHAENK	0.7888	0.3221	0	0.3021	0.4737	0.3246	0.2943	0	0	0.3816	0.2983	0	0	0	0	0	0.4559	0	0.3186	0	0	1.80983e+06	0	961279	3613410	2.41351e+06	2.42368e+06	0	0	1.36162e+06	649222	0	0	0	0	0	1.99474e+06	735740	2629859	0	0	1.60693e+06	0	1.4633e+06	2.03206e+06
Q9EST3_S387	Eif4enif1	sp|Q9EST3|4ET_MOUSE	Q9EST3	LAGLEQAVLSPGQNSGNYFAPIPsEDHAENK	0.9154	0.8276	0	0.8451	0.8659	0.8752	0.8469	0.7262	0.8436	0	0.8865	0	0	0	0.6397	0	0	0.8673	0	0.5038	0.53	1.34732e+06	0	1.76348e+06	1.91774e+06	2.41351e+06	2.42368e+06	1.66556e+06	569132	0	2151021	0	0	0	264334	265285	0	1.89317e+06	0	2.73943e+06	876786	3.10801e+06	0	1.59259e+06	1.7319e+06
Q9EST3_S563	Eif4enif1	sp|Q9EST3|4ET_MOUSE	Q9EST3	APsPPMSQVFR	0.939	0.5	0.5	0.9214	0.5	0.9244	0.9145	0.7165	0	0.5	0.9318	0	0	0	0	0	0.9156	0.9323	0	0.9238	0.8831	430779	511876	537248	662733	503576	506603	425983	429329	399591	336985	0	0	590939	0	266478	649164	832569	455886	726000	795499	202147	255213	262608	294766
Q9EST3_S567	Eif4enif1	sp|Q9EST3|4ET_MOUSE	Q9EST3	APSPPMsQVFR	0.9247	0	0	0	0	0	0	0	0.7527	0	0	0	0	0	0	0	0	0	0	0	0	0	0	0	0	0	0	0	429329	0	0	397912	284033	0	250362	0	0	0	0	0	0	0	0	0	0
Q9EST3_S586	Eif4enif1	sp|Q9EST3|4ET_MOUSE	Q9EST3	IPsPIGFPSGPQQLLGDPFQGMR	0.9325	0	0	0.9153	0	0.7346	0.5	0	0	0	0.5	0	0	0	0	0	0.8179	0.5	0.5	0.5	0.906	0	0	312391	234041	606006	892028	947166	0	0	1.233e+06	0	0	0	0	0	2.1609e+06	1.47281e+06	0	1.61364e+06	1.51556e+06	0	0	312391	234041
Q9EST3_S592	Eif4enif1	sp|Q9EST3|4ET_MOUSE	Q9EST3	IPSPIGFPsGPQQLLGDPFQGMR	0.7862	0	0	0	0	0	0.598	0	0	0.6576	0	0	0	0	0	0	0	0.5894	0	0.7147	0	0	0	0	0	0	892028	0	0	975216	0	0	0	0	0	0	0	1.47281e+06	0	0	0	0	0	0	0
Q9EST3_S76	Eif4enif1	sp|Q9EST3|4ET_MOUSE	Q9EST3	sSPVESLK	0.8969	0.4648	0.3333	0.4903	0.3333	0.4899	0.4897	0.4905	0.3333	0.4908	0.3333	0.3333	0.4903	0	0.3333	0.3333	0.3333	0.3333	0.3333	0.4905	0	661742	723232	562610	505566	381898	242217	681616	714184	463097	595317	699588	843586	208096	362823	445161	658151	873079	1.00501e+06	791891	42557.2	661742	723232	562610	505566
Q9EST3_S928	Eif4enif1	sp|Q9EST3|4ET_MOUSE	Q9EST3	SVLHPPGSSSQAAAISVQTPQNVPsR	0.8375	0	0	0	0.7729	0.5234	0	0	0	0	0	0	0	0	0	0	0	0	0	0.8356	0	0	0	0	0	369720	0	0	0	0	0	0	0	0	0	0	0	0	0	688313	0	0	0	0	0
Q9EST3_S949	Eif4enif1	sp|Q9EST3|4ET_MOUSE	Q9EST3	SSsPVGLAK	0.9376	0	0	0	0	0	0	0	0.9021	0	0	0	0	0	0	0	0	0.9354	0	0	0	0	0	0	0	0	307257	0	530305	577889	0	0	0	0	0	0	0	480804	0	0	83709.9	0	0	0	0
Q9EST3_T922	Eif4enif1	sp|Q9EST3|4ET_MOUSE	Q9EST3	SVLHPPGSSSQAAAISVQtPQNVPSR	0.92	0.2841	0	0	0.92	0.4469	0.3325	0	0.3593	0	0	0	0	0	0	0	0.4575	0	0	0	0.3615	498021	0	0	616786	296428	544596	0	186072	222503	0	0	0	0	0	0	774790	0	0	0	808456	498021	0	0	616786
Q9EST5_T265	Anp32b	sp|Q9EST5|AN32B_MOUSE	Q9EST5	KREtDDEGEDD	1	0	1	1	1	1	0	0	0	0	0	0	0	0	0	0	0	0	0	0	0	1.36315e+06	570536	166665	459121	801007	0	0	0	0	0	0	0	0	0	0	0	0	0	0	0	1.36315e+06	570536	166665	459121
Q9ET54_S1141	Palld	sp|Q9ET54|PALLD_MOUSE	Q9ET54	sRsRDsGDENEPIQER	1	0	0	0	0	0	0	0	0	0	0	0	0	0	0	0	0	0	0	0	0	0	337786	74371.3	0	0	0	0	0	0	0	0	0	0	0	0	0	0	0	0	0	0	216402	74371.3	0
Q9ET54_S1143	Palld	sp|Q9ET54|PALLD_MOUSE	Q9ET54	sRsRDsGDENEPIQER	1	0	0	0	0	0	0	0	0	0	0	0	0	0	0	0	0	0	0	0	0	0	337786	74371.3	0	0	0	0	0	0	0	0	0	0	0	0	0	0	0	0	0	0	216402	74371.3	0
Q9ET54_S1146	Palld	sp|Q9ET54|PALLD_MOUSE	Q9ET54	sRsRDsGDENEPIQER	1	0	0	0	0	0	0	0	0	0	0	0	0	0	0	0	0	0	0	0	0	0	337786	74371.3	0	0	0	0	0	0	0	0	0	0	0	0	0	0	0	0	0	0	216402	74371.3	0
Q9ET54_T908	Palld	sp|Q9ET54|PALLD_MOUSE	Q9ET54	IASDEEIQGtK	0.9018	0	0.9018	0	0	0	0	0	0	0	0	0	0	0	0	0	0	0	0	0	0	0	129093	100236	36330.6	0	0	0	0	0	0	0	0	0	0	0	0	0	0	0	0	0	129093	100236	36330.6
Q9JHW4_S524	Eefsec	sp|Q9JHW4|SELB_MOUSE	Q9JHW4	IHIPGGLsPESK	0.9234	0.5	0	0	0	0.5782	0	0	0	0	0	0	0	0	0	0	0	0	0	0	0	89428.5	78560.1	0	0	90295.6	0	0	0	0	0	0	0	0	0	0	0	0	0	0	0	89428.5	78560.1	0	0
Q9JJ11_S71	Tacc3	sp|Q9JJ11|TACC3_MOUSE	Q9JJ11	ILsPNMTNK;ILsPNMTNKR	0.9399	0.9046	0.5025	0.9338	0.9283	0.5932	0.9397	0.5	0.5	0.5	0.9348	0.9088	0.9274	0.5	0.5	0.5	0.9243	0.9379	0.9388	0.9379	0	1.46815e+06	2690302	1.48059e+06	1.39774e+06	1.13921e+06	824396	941632	1.69175e+06	1.40924e+06	790514	1.568e+06	1819562	0	677925	0	1111590	1.76044e+06	1153891	1838577	0	648050	1.0165e+06	634224	475335
Q9JJ11_T53	Tacc3	sp|Q9JJ11|TACC3_MOUSE	Q9JJ11	AtNVTFQTPPRDPQTHR	0.8867	0	0.3279	0	0	0.25	0.3303	0	0.25	0.3036	0.4426	0.8179	0.3084	0	0.7557	0.3145	0	0	0.3277	0	0.7663	0	843227	0	0	2.86695e+06	2.99463e+06	0	2346535	2539189	2.78298e+06	2.63183e+06	530813	479641	2496185	1.39791e+06	0	4.44368e+06	601691	0	3921309	0	814297	0	0
Q9JJ11_T56	Tacc3	sp|Q9JJ11|TACC3_MOUSE	Q9JJ11	ATNVtFQTPPRDPQTHR	0.9021	0	0	0.8902	0.9021	0	0	0.4796	0	0	0	0	0	0	0.2878	0	0	0.4749	0	0.8511	0	852202	348171	2.35586e+06	2.81828e+06	221629	0	2.73226e+06	0	0	0	0	0	0	2496185	0	0	1.96313e+06	0	3.74591e+06	0	852202	348171	2.35586e+06	2.81828e+06
Q9JJ11_T59	Tacc3	sp|Q9JJ11|TACC3_MOUSE	Q9JJ11	ATNVTFQtPPRDPQTHR	0.9355	0	0	0	0	0.9355	0.4046	0.8504	0.4853	0	0	0	0.4665	0	0	0	0	0	0	0	0	0	0	0	0	2.86695e+06	2.99463e+06	2.73226e+06	2346535	0	0	0	2.47315e+06	4.81437e+06	0	0	0	0	0	0	0	0	0	0	0
Q9JJ11_T66	Tacc3	sp|Q9JJ11|TACC3_MOUSE	Q9JJ11	ATNVTFQTPPRDPQtHR	0.9226	0	0	0	0	0.8449	0	0.7024	0.2907	0	0	0	0	0	0	0.299	0	0.4865	0	0.9163	0.9226	1.9098e+06	0	0	0	2.86695e+06	0	2.73226e+06	2346535	0	0	0	0	0	0	1.40673e+06	4.11814e+06	3.42022e+06	0	3.74591e+06	3921309	1.9098e+06	0	0	0
Q9JJ11_T75	Tacc3	sp|Q9JJ11|TACC3_MOUSE	Q9JJ11	ILSPNMtNK	0.9207	0	0	0	0	0	0	0.9168	0	0.8623	0	0	0	0	0	0.8544	0	0	0	0	0	0	0	0	0	0	0	941632	0	924562	0	0	0	302983	0	628070	0	0	0	0	0	0	0	0	0
Q9JJG0_S354	Tacc2	sp|Q9JJG0|TACC2_MOUSE	Q9JJG0	ETQQEPGEEsPVPSEEHLAPETK	0.9311	0	0.4864	0.2875	0.9227	0.8477	0	0	0	0.897	0.2984	0	0	0	0	0	0.6201	0.8536	0.8789	0.9154	0.8441	0	2227138	834667	2.16778e+06	1201127	0	0	0	932298	0	0	0	0	327770	0	1.26947e+06	1.54059e+06	1.84787e+06	1.70433e+06	1061245	0	2.09172e+06	3116655	2.03597e+06
Q9JJG0_S358	Tacc2	sp|Q9JJG0|TACC2_MOUSE	Q9JJG0	ETQQEPGEESPVPsEEHLAPETK	0.9327	0	0.4726	0.7753	0	0	0.8502	0	0	0	0.4282	0	0	0	0	0	0.6806	0	0	0	0	0	2.50727e+06	1.95069e+06	0	0	720952	0	586431	0	598370	540670	0	0	0	0	1.26947e+06	0	0	0	0	0	2.50727e+06	1.95069e+06	0
Q9JJG0_S419	Tacc2	sp|Q9JJG0|TACC2_MOUSE	Q9JJG0	VQNsPPVGR;VQNsPPVGRK	1	1	1	1	1	1	0	0	0	1	0	1	0	0	0	0	1	1	0	0	0	393345	1.21373e+06	915049	726212	416158	0	0	0	172833	0	448783	338769	0	0	0	83331.4	277940	0	0	0	393345	751452	620750	476214
Q9JJG0_S510	Tacc2	sp|Q9JJG0|TACC2_MOUSE	Q9JJG0	LDNTPAsPPRSPTEPSDTPIAK;LDNTPAsPPRSPTEPsDtPIAK;LDNtPAsPPRSPTEPSDTPIAK	0.9051	0	0	0	0	0.43	0.4822	0.4471	0.9051	0	0.5264	0.4595	0	0	0.3333	0	0	0	0	0	0	0	0	907120	176777	928112	435880	321045	536526	523487	275254	1.66617e+06	0	0	740405	0	319670	412220	220369	274435	347001	0	0	302949	181520
Q9JJG0_S519	Tacc2	sp|Q9JJG0|TACC2_MOUSE	Q9JJG0	LDNTPAsPPRSPTEPsDtPIAK	0.8367	0	0	0	0	0	0	0	0	0	0	0	0	0	0	0	0	0	0	0	0	0	0	623496	0	356553	0	0	0	0	0	0	0	0	0	0	0	0	0	0	0	0	0	623496	0
Q9JJG0_S642	Tacc2	sp|Q9JJG0|TACC2_MOUSE	Q9JJG0	RsPLSDPPSQDPTPAATPEAPSAISTVVHATDEEK;RsPLsDPPSQDPTPAATPEAPSAISTVVHATDEEK	0.8634	0.3281	0	0.7833	0.8473	0.2732	0	0	0	0	0	0	0	0	0	0	0	0.4533	0	0	0	464222	0	682036	694150	523837	0	0	157153	184891	0	0	0	0	0	0	0	322569	0	0	0	464222	0	682036	694150
Q9JJG0_S645	Tacc2	sp|Q9JJG0|TACC2_MOUSE	Q9JJG0	RsPLsDPPSQDPTPAATPEAPSAISTVVHATDEEK	0.8375	0.3281	0	0.7833	0.8375	0.2732	0	0	0	0	0	0	0	0	0	0	0	0.4533	0	0	0	464222	0	682036	694150	523837	0	0	157153	184891	0	0	0	0	0	0	0	322569	0	0	0	464222	0	682036	694150
Q9JJG0_S714	Tacc2	sp|Q9JJG0|TACC2_MOUSE	Q9JJG0	FNsPSEELDYR	0.9361	0.9189	0.4811	0.4765	0	0.9361	0	0	0.3333	0	0	0	0	0	0	0	0.3333	0.3333	0.4845	0.3333	0	159203	367223	341858	280370	469951	151682	182677	201240	228068	220166	0	0	0	0	0	267256	319345	277874	196726	213260	159203	367223	341858	280370
Q9JJG0_S759	Tacc2	sp|Q9JJG0|TACC2_MOUSE	Q9JJG0	QALYLMFDTPQEsPVK;QALYLMFDTPQEsPVKsPPVR	0.9276	0	0	0	0	0.8439	0	0	0	0	0	0	0	0	0	0	0	0	0	0	0	138503	179740	181735	220831	383499	0	0	0	0	0	0	0	0	0	0	0	0	0	0	0	138503	179740	181735	220831
Q9JJG0_S763	Tacc2	sp|Q9JJG0|TACC2_MOUSE	Q9JJG0	QALYLMFDTPQEsPVKsPPVR	0.8439	0	0	0	0	0.8439	0	0	0	0	0	0	0	0	0	0	0	0	0	0	0	138503	179740	181735	220831	383499	0	0	0	0	0	0	0	0	0	0	0	0	0	0	0	138503	179740	181735	220831
Q9JJG0_T338	Tacc2	sp|Q9JJG0|TACC2_MOUSE	Q9JJG0	KPtETPPVK	0.8853	0	0.8853	0.5	0.5	0.5	0.5	0	0.5	0.5	0.5	0	0	0	0	0	0.5	0.5	0.5	0.5	0	0	536749	214585	195533	328680	0	0	0	175663	188113	0	0	0	0	0	213786	432119	421849	315122	0	0	536749	214585	195533
Q9JJG0_T346	Tacc2	sp|Q9JJG0|TACC2_MOUSE	Q9JJG0	EtQQEPGEESPVPSEEHLAPETK	0.9242	0.4869	0.4777	0.9242	0.5619	0.82	0	0.4854	0	0.3787	0	0	0	0	0	0	0.3601	0.25	0.5174	0	0	1.44573e+06	2.50727e+06	1.95069e+06	2.16778e+06	1.92107e+06	0	660109	0	932298	0	0	0	0	0	0	1.26947e+06	1.54059e+06	1.92543e+06	0	0	1.44573e+06	2.50727e+06	1.95069e+06	2.16778e+06
Q9JJG0_T366	Tacc2	sp|Q9JJG0|TACC2_MOUSE	Q9JJG0	ETQQEPGEESPVPSEEHLAPEtK	0.8272	0.4131	0	0	0	0	0	0	0.2511	0	0	0	0	0	0	0	0	0	0.5758	0	0	1.44573e+06	0	0	0	0	0	0	639359	0	0	0	0	611718	0	0	0	0	1.92543e+06	0	0	1.44573e+06	0	0	0
Q9JJG0_T507	Tacc2	sp|Q9JJG0|TACC2_MOUSE	Q9JJG0	LDNtPASPPRsPTEPSDTPIAK;LDNtPAsPPRSPTEPSDTPIAK	0.9051	0	0	0	0	0.43	0.4822	0.4471	0.9051	0	0.5264	0.4595	0	0	0.3333	0	0	0	0	0	0	0	0	283624	176777	571559	435880	321045	536526	523487	275254	1.66617e+06	0	0	740405	0	319670	412220	220369	274435	347001	0	0	287544	179220
Q9JJG0_T521	Tacc2	sp|Q9JJG0|TACC2_MOUSE	Q9JJG0	LDNTPAsPPRSPTEPsDtPIAK	0.8367	0	0	0	0	0	0	0	0	0	0	0	0	0	0	0	0	0	0	0	0	0	0	623496	0	356553	0	0	0	0	0	0	0	0	0	0	0	0	0	0	0	0	0	623496	0
Q9JJG0_T653	Tacc2	sp|Q9JJG0|TACC2_MOUSE	Q9JJG0	RSPLSDPPSQDPtPAAtPEAPSAISTVVHATDEEK	0.8715	0	0	0.8715	0	0	0	0	0	0	0	0	0	0	0	0	0.3274	0	0.328	0	0	0	0	682036	0	0	0	0	0	0	235258	0	0	0	0	0	376120	0	501184	500203	0	0	0	682036	0
Q9JJG0_T657	Tacc2	sp|Q9JJG0|TACC2_MOUSE	Q9JJG0	RSPLSDPPSQDPtPAAtPEAPSAISTVVHATDEEK	0.8715	0	0	0.8715	0	0	0	0	0	0	0	0	0	0	0	0	0.3274	0	0.328	0	0	0	0	682036	0	0	0	0	0	0	235258	0	0	0	0	0	376120	0	501184	500203	0	0	0	682036	0
Q9JJG0_T743	Tacc2	sp|Q9JJG0|TACC2_MOUSE	Q9JJG0	LGSSLPQDDDtPKK	0.928	0	0.9077	0	0.9188	0.9089	0	0	0	0	0	0	0	0	0	0	0	0.928	0	0.8994	0	0	939819	1.09935e+06	1.11586e+06	1.20214e+06	596924	0	570742	0	520664	0	0	0	0	0	452541	1.31893e+06	1.22514e+06	441126	746397	0	874536	588130	598533
Q9JJG0_Y721	Tacc2	sp|Q9JJG0|TACC2_MOUSE	Q9JJG0	FNSPSEELDyR	0.7872	0	0	0	0.7872	0	0	0	0	0	0	0	0	0	0	0	0	0	0	0	0	0	0	0	280370	0	0	0	0	0	0	0	0	0	0	0	0	0	0	0	0	0	0	0	280370
Q9JKB3_S328	Ybx3	sp|Q9JKB3|YBOX3_MOUSE	Q9JKB3	sRPLNAVSQDGK	0.9409	0.5	0	0.5	0.8229	0	0	0	0	0	0	0.9409	0.5	0	0.9375	0.8488	0	0.5	0	0.5	0	357342	542322	297706	435562	334547	0	0	262546	0	267444	3.06461e+06	2.71315e+06	0	2.07722e+06	929764	0	0	565508	436633	0	357342	542322	297706	435562
Q9JKB3_S33	Ybx3	sp|Q9JKB3|YBOX3_MOUSE	Q9JKB3	sPAASGAPQAPAPAALLAGSPGGDAAPGPAPASSAPAGGEDAEK;sPAASGAPQAPAPAALLAGsPGGDAAPGPAPASSAPAGGEDAEK;sPAAsGAPQAPAPAALLAGSPGGDAAPGPAPASSAPAGGEDAEK;sPAAsGAPQAPAPAALLAGSPGGDAAPGPAPASSAPAGGEDAEKK	0.9216	0.6232	0.7952	0.6011	0.8467	0.6236	0.9078	0.8439	0.705	0.7843	0.8686	0	0.474	0.7589	0.4	0	0.7744	0.6287	0.6427	0.6276	0.6259	0	1.79988e+06	0	0	5.77025e+06	12431522	11009483	4.17662e+06	2.9814e+06	6.87424e+06	663897	2.2823e+06	1.51213e+06	0	0	12525464	11683034	8.1868e+06	10816087	17677628	0	1.6633e+06	0	0
Q9JKB3_S37	Ybx3	sp|Q9JKB3|YBOX3_MOUSE	Q9JKB3	SPAAsGAPQAPAPAALLAGSPGGDAAPGPAPASSAPAGGEDAEK;SPAAsGAPQAPAPAALLAGsPGGDAAPGPAPASSAPAGGEDAEK;sPAAsGAPQAPAPAALLAGSPGGDAAPGPAPASSAPAGGEDAEK;sPAAsGAPQAPAPAALLAGSPGGDAAPGPAPASSAPAGGEDAEKK	0.9216	0.4	0.7952	0.7631	0.8467	0.4745	0.6134	0.8439	0.9101	0.7699	0.8686	0	0.474	0	0.4	0	0.7744	0.6287	0.6427	0.4036	0.5136	0	1.79988e+06	0	0	3.81243e+06	7.74042e+06	6.43055e+06	7284916	2.9814e+06	5136983	0	1169413	0	0	0	8767128	9547968	4.0934e+06	1.58422e+06	11246239	0	1517169	0	0
Q9JKB3_S52	Ybx3	sp|Q9JKB3|YBOX3_MOUSE	Q9JKB3	SPAASGAPQAPAPAALLAGsPGGDAAPGPAPASSAPAGGEDAEK;SPAASGAPQAPAPAALLAGsPGGDAAPGPAPASSAPAGGEDAEKK;SPAASGAPQAPAPAALLAGsPGGDAAPGPAPAsSAPAGGEDAEK;SPAAsGAPQAPAPAALLAGsPGGDAAPGPAPASSAPAGGEDAEK;sPAASGAPQAPAPAALLAGsPGGDAAPGPAPASSAPAGGEDAEK	0.9139	0.6899	0.4669	0.8073	0.6828	0.6884	0.8963	0.6813	0.9139	0.7903	0.6815	0	0	0.3875	0.3145	0.3758	0.5197	0.6909	0.6887	0.6506	0.6889	0	1.79988e+06	0	0	3.81243e+06	7.74042e+06	4.57893e+06	3.1083e+06	5962795	3.78473e+06	0	0	0	510976	544757	3758336	8254621	4.0934e+06	9231867	6431389	0	1.72742e+06	0	0
Q9JKB3_S65	Ybx3	sp|Q9JKB3|YBOX3_MOUSE	Q9JKB3	SPAASGAPQAPAPAALLAGSPGGDAAPGPAPAssAPAGGEDAEK;SPAASGAPQAPAPAALLAGsPGGDAAPGPAPAsSAPAGGEDAEK	0.8736	0.8557	0.7098	0.8025	0	0	0	0.4984	0	0	0	0	0	0	0	0	0.4588	0.5114	0.443	0.5182	0	0	3.59976e+06	0	0	0	0	4.57893e+06	0	0	0	0	0	0	0	0	5.00879e+06	8254621	0	8889466	0	0	1.78847e+06	0	0
Q9JKB3_S66	Ybx3	sp|Q9JKB3|YBOX3_MOUSE	Q9JKB3	SPAASGAPQAPAPAALLAGSPGGDAAPGPAPAssAPAGGEDAEK	0.8736	0.8557	0.7098	0.4613	0	0	0	0.4984	0	0	0	0	0	0	0	0	0.4588	0.5114	0.443	0.5182	0	0	1.79988e+06	0	0	0	0	4.57893e+06	0	0	0	0	0	0	0	0	5.00879e+06	4.12731e+06	0	8889466	0	0	1.78847e+06	0	0
Q9JKB3_Y184	Ybx3	sp|Q9JKB3|YBOX3_MOUSE	Q9JKB3	NyAGEEEEEGSGSSEGFEPPAADGQFSGAR	0.8068	0	0	0	0	0	0	0	0	0	0	0	0	0	0	0	0	0	0	0	0	0	0	0	0	0	0	0	0	0	0	0	0	255420	0	0	0	0	0	0	0	0	0	0	0
Q9JKX6_S10	Nudt5	sp|Q9JKX6|NUDT5_MOUSE	Q9JKX6	METRESTEssPGK	0.9298	0	0	0	0	0	0	0	0	0	0	0	0	0	0	0	0	0	0	0	0	0	0	0	1.28008e+06	0	0	0	0	0	0	0	0	0	0	0	0	0	0	0	0	0	0	0	1.28008e+06
Q9JKX6_S9	Nudt5	sp|Q9JKX6|NUDT5_MOUSE	Q9JKX6	METRESTEssPGK	0.9298	0	0	0	0	0	0	0	0	0	0	0	0	0	0	0	0	0	0	0	0	0	0	0	1.28008e+06	0	0	0	0	0	0	0	0	0	0	0	0	0	0	0	0	0	0	0	1.28008e+06
Q9JLI8_S10	Sart3	sp|Q9JLI8|SART3_MOUSE	Q9JLI8	ATTAASSAsEPEVEPQAGPEAEGEEDEAK	0.8661	0	0.8661	0	0.7272	0	0	0	0	0	0	0	0	0	0	0	0	0	0	0	0	0	212875	0	0	0	0	0	0	0	0	0	0	0	0	0	0	0	0	0	0	0	0	0	0
Q9JLQ0_S458	Cd2ap	sp|Q9JLQ0|CD2AP_MOUSE	Q9JLQ0	sVDLDAFVAR	1	1	0	1	0	1	0	0	0	0	0	0	0	0	0	0	0	0	0	0	0	64826.8	0	97791.7	0	110882	0	0	0	0	0	0	0	0	0	0	0	0	0	0	0	64826.8	0	97791.7	0
Q9QX47_S2027	Son	sp|Q9QX47|SON_MOUSE	Q9QX47	sFsIsPVR	1	0	0	0	0	0	0	0	0	0	0	0	0	0	0	0	0	0	0	0	0	0	119199	0	0	0	0	0	0	0	0	0	0	0	0	0	0	0	0	0	0	0	119199	0	0
Q9QX47_S2029	Son	sp|Q9QX47|SON_MOUSE	Q9QX47	sFsIsPVR	1	0	0	0	0	0	0	0	0	0	0	0	0	0	0	0	0	0	0	0	0	0	119199	0	0	0	0	0	0	0	0	0	0	0	0	0	0	0	0	0	0	0	119199	0	0
Q9QX47_S2031	Son	sp|Q9QX47|SON_MOUSE	Q9QX47	sFsIsPVR	1	0	0	0	0	0	0	0	0	0	0	0	0	0	0	0	0	0	0	0	0	0	119199	0	0	0	0	0	0	0	0	0	0	0	0	0	0	0	0	0	0	0	119199	0	0
Q9QXZ0_T5553	Macf1	sp|Q9QXZ0|MACF1_MOUSE	Q9QXZ0	EAEEELAASGGQSPtGEQIPQFQQR	0.8548	0	0	0.8548	0	0	0	0	0	0	0	0	0	0	0	0	0	0	0	0	0	0	0	457611	0	0	0	0	0	0	0	0	0	0	0	0	84969.2	246201	220748	169524	201542	0	0	457611	0
Q9QYY8_S113	Spast	sp|Q9QYY8|SPAST_MOUSE	Q9QYY8	RSSGTAPAPASPSPPEPGPGGEAEsVR	0.8254	0	0	0	0	0	0	0	0.5192	0	0	0	0	0	0	0	0	0	0	0	0	0	0	0	0	0	0	0	481888	0	0	0	0	0	0	0	0	0	0	0	0	0	0	0	0
Q9QYY8_S90	Spast	sp|Q9QYY8|SPAST_MOUSE	Q9QYY8	RsSGTAPAPASPSPPEPGPGGEAESVR	0.815	0.2416	0.2423	0.308	0.2913	0.1978	0.199	0.1667	0	0.1942	0.1987	0	0	0	0	0	0.1964	0.1667	0	0.1991	0.1667	143130	252349	350087	383035	389332	282408	248425	0	266773	262869	0	0	0	0	0	358467	484779	0	407860	360704	143130	252349	350087	383035
Q9QYY8_S99	Spast	sp|Q9QYY8|SPAST_MOUSE	Q9QYY8	RSSGTAPAPAsPSPPEPGPGGEAESVR;SSGTAPAPAsPSPPEPGPGGEAESVR	0.8426	0.458	0	0.2052	0.7854	0.441	0.3895	0	0	0	0.4688	0	0	0	0	0	0	0.3222	0.1798	0.2751	0	143130	0	350087	383035	465860	250218	0	872299	0	660039	0	0	0	0	0	0	484779	480814	407860	0	149400	0	365422	399814
Q9QZ05_S230	Eif2ak4	sp|Q9QZ05|E2AK4_MOUSE	Q9QZ05	AAAILHGGsPDFVGNGK	1	0	0	0	1	0	0	0	0	0	0	0	0	0	0	0	0	0	0	0	0	182219	0	0	234530	0	0	0	0	0	0	0	0	0	0	0	0	0	0	0	0	182219	0	0	234530
Q9QZM0_S25	Ubqln2	sp|Q9QZM0|UBQL2_MOUSE	Q9QZM0	GPAAAPGAAsPPAEPK	1	0	0	0	1	1	0	0	0	0	0	0	0	0	0	0	0	0	0	0	0	202696	98408.5	166423	122651	295262	0	0	0	0	0	0	0	0	0	0	0	0	0	0	0	136224	239974	112523	86041.5
Q9QZQ1_S1172	Afdn	sp|Q9QZQ1|AFAD_MOUSE	Q9QZQ1	ADHRsSPNVANQPPsPGGK;ADHRssPNVANQPPSPGGK;ADHRssPNVANQPPsPGGK	1	0.774	0.6667	0.6667	0	0.689	0.6592	0	0	0	0	0	0	0	0	0	0	0	1	0.6667	0	121653	255798	110002	204478	216145	260841	403737	0	193437	184311	0	0	0	0	0	91033.2	620407	402184	0	185672	137136	250161	124002	199972
Q9QZQ1_S1173	Afdn	sp|Q9QZQ1|AFAD_MOUSE	Q9QZQ1	ADHRssPNVANQPPSPGGK;ADHRssPNVANQPPsPGGK	1	0.774	0.6667	0.6667	0	0.689	0	0	0	0	0	0	0	0	0	0	0	0	1	0.6667	0	121653	0	110002	0	216145	0	0	0	0	0	0	0	0	0	0	91033.2	289204	172059	0	0	121653	0	110002	0
Q9QZQ1_S1182	Afdn	sp|Q9QZQ1|AFAD_MOUSE	Q9QZQ1	ADHRsSPNVANQPPsPGGK;ADHRssPNVANQPPsPGGK;SSPNVANQPPsPGGK	1	0	0	0	0	0	0.6815	0	0	0	0	0	0	0	0	0	0	0	1	0	0	0	255798	0	204478	0	260841	403737	0	193437	184311	0	0	0	0	0	0	331204	230125	0	185672	0	255798	0	204478
Q9QZQ1_S1795	Afdn	sp|Q9QZQ1|AFAD_MOUSE	Q9QZQ1	LFsQGQDVSDK	0.9326	0.8887	0.5	0.6197	0.5	0.885	0.9	0.905	0.6947	0.5	0.9326	0	0	0	0.5	0	0.8404	0.8773	0.5	0.8295	0.8527	597540	795431	637082	468639	513829	286253	378841	354084	281091	0	0	155784	284710	0	194249	444008	750405	0	594992	418009	402614	502689	637505	468950
Q9QZQ1_S1801	Afdn	sp|Q9QZQ1|AFAD_MOUSE	Q9QZQ1	LFSQGQDVsDK	0.7985	0	0	0.6046	0	0	0	0	0	0	0	0	0	0	0	0	0	0.7357	0.6044	0	0	0	0	637082	0	0	0	0	0	0	0	0	0	0	0	0	0	750405	429855	0	0	0	0	637082	0
Q9QZQ1_S216	Afdn	sp|Q9QZQ1|AFAD_MOUSE	Q9QZQ1	TIsNPEVVMK	0.9269	0	0	0	0	0.9269	0	0	0	0	0	0	0	0	0	0	0	0	0	0	0	0	0	0	0	198098	0	0	0	0	0	0	0	0	0	0	0	0	0	0	0	0	0	0	0
Q9QZQ1_T1458	Afdn	sp|Q9QZQ1|AFAD_MOUSE	Q9QZQ1	SQTLNPASFSPLAtQAKPEK	0.8957	0	0	0	0	0.3217	0	0	0	0	0	0	0	0	0	0	0	0.8957	0	0	0	0	1.05751e+06	604331	0	518349	0	0	0	0	0	0	0	0	0	0	0	483280	0	475178	0	0	1.05751e+06	604331	0
Q9QZQ1_T1715	Afdn	sp|Q9QZQ1|AFAD_MOUSE	Q9QZQ1	tQVLSPDSLFTAK	0.7513	0.25	0	0.25	0.25	0	0	0	0	0	0	0	0	0	0	0	0	0.25	0.25	0.3148	0	208910	0	297489	68070.7	0	0	0	0	0	0	0	0	0	0	0	0	311616	0	292529	0	208910	0	297489	68070.7
Q9QZQ1_T1725	Afdn	sp|Q9QZQ1|AFAD_MOUSE	Q9QZQ1	TQVLSPDSLFtAK	0.8127	0	0	0	0	0.8127	0	0	0	0	0	0	0	0	0	0	0	0	0	0	0	0	0	0	0	515112	0	0	0	0	0	0	0	0	0	0	0	0	0	0	0	0	0	0	0
Q9QZQ1_T214	Afdn	sp|Q9QZQ1|AFAD_MOUSE	Q9QZQ1	tISNPEVVMK	0.9322	0	0.5	0	0	0.5	0	0	0	0	0	0	0	0	0	0	0	0	0	0	0	139091	302162	157850	183452	123439	0	0	0	0	0	0	0	0	0	0	0	0	0	0	0	139091	302162	157850	183452
Q9R020_S153	Zranb2	sp|Q9R020|ZRAB2_MOUSE	Q9R020	EVEDKEsEGEEEDEDEDLSK	0.9225	0.5	0.5	0.5	0.5	0.8917	0.5	0	0.5	0	0	0	0	0	0	0.6755	0	0	0	0	0	249126	572286	501080	150662	205276	0	0	227053	0	0	0	0	0	0	232731	222326	277026	315647	305399	352536	249126	296360	311034	150662
Q9R020_S165	Zranb2	sp|Q9R020|ZRAB2_MOUSE	Q9R020	EVEDKESEGEEEDEDEDLsK	0.8915	0	0	0	0.5651	0	0	0	0	0	0	0	0	0	0	0.8191	0	0	0	0	0	0	0	0	150662	0	0	255181	0	0	0	296323	331223	244858	0	232731	0	0	0	0	0	0	0	0	150662
Q9R020_Y114	Zranb2	sp|Q9R020|ZRAB2_MOUSE	Q9R020	ENVEyIEREESDGEYDEFGR	0.8692	0	0	0	0	0.425	0	0	0	0	0	0	0	0	0	0	0	0	0	0	0	0	0	0	31034.1	111093	0	0	0	0	0	0	0	0	0	0	0	0	0	0	0	0	0	0	31034.1
Q9R0A0_S334	Pex14	sp|Q9R0A0|PEX14_MOUSE	Q9R0A0	EDEDDEDDDVsHVDEEDVLGVQR;REDKEDEDDEDDDVsHVDEEDVLGVQR	1	1	1	1	0	0	0	0	0	0	0	0	0	0	0	0	0	0	0	0	0	230418	323980	231138	0	306697	0	0	0	0	0	0	0	0	0	0	0	0	0	0	0	230418	323980	231138	0
Q9R0Q7_S113	Ptges3	sp|Q9R0Q7|TEBP_MOUSE	Q9R0Q7	DWEDDsDEDMSNFDR	0.941	0.9307	0.9116	0.9337	0.941	0.9285	0	0	0	0	0	0	0	0	0	0	0	0	0	0	0	3623568	2.91038e+06	3.66859e+06	3.57547e+06	3.16782e+06	0	0	0	0	0	0	0	0	0	0	0	0	0	0	0	2.06038e+06	1.64777e+06	2.02786e+06	2.18177e+06
Q9R0Q7_S118	Ptges3	sp|Q9R0Q7|TEBP_MOUSE	Q9R0Q7	DWEDDSDEDMsNFDR	0.7837	0	0.7295	0.7837	0.6774	0	0	0	0	0	0	0	0	0	0	0	0	0	0	0	0	0	2.91038e+06	1.82247e+06	2.40788e+06	0	0	0	0	0	0	0	0	0	0	0	0	0	0	0	0	0	1.50401e+06	1.96083e+06	2.39436e+06
Q9R1C0_S256	Taf7	sp|Q9R1C0|TAF7_MOUSE	Q9R1C0	LNEsDEQHQENEGTNQLVMGIQK	0.8916	0.6623	0	0	0.5	0	0	0	0	0	0	0	0	0	0	0	0	0	0	0	0	375371	387407	555296	700014	283186	0	0	0	0	0	0	0	0	0	0	0	0	0	0	0	196988	204197	294899	369466
Q9R1M5_S127	Nlrp5	sp|Q9R1M5|NALP5_MOUSE	Q9R1M5	GLEEEQKsESTMSPSENVsR;GLEEEQKsEsTMSPSENVSR;GLEEEQKsEstMSPSENVSR;sESTMSPSENVSR;sEsTMSPSENVSR	0.921	0.921	0.7184	0.8638	0.878	0.7564	0.4844	0.3333	0.3232	0.2461	0.4908	0	0.1974	0	0.1667	0	0.3333	0.3648	0.7112	0.4696	0.3723	150417664	139900960	98295464	112280824	148097424	481326	4.462e+06	17192792	9338576	235424	0	0	0	159116	0	63661260	20294370	33933936	9913176	707630	57027488	33506830	43221652	43332932
Q9R1M5_S129	Nlrp5	sp|Q9R1M5|NALP5_MOUSE	Q9R1M5	GLEEEQKsEsTMSPSENVSR;GLEEEQKsEstMSPSENVSR;SEsTMSPSENVSR;sEsTMSPSENVSR	0.9033	0.7672	0.7184	0.9033	0.8082	0.5	0.4844	0.3333	0	0	0.4908	0	0	0	0	0	0.3333	0.327	0.4861	0.4696	0.3723	44761316	114972112	73114128	67445048	3344363	481326	0	0	0	0	0	0	0	0	0	722310	1.19264e+06	878001	1.24779e+06	707630	4.84493e+06	6525819	7.59286e+06	6019784
Q9R1M5_S132	Nlrp5	sp|Q9R1M5|NALP5_MOUSE	Q9R1M5	GLEEEQKSESTMsPSENVSR;GLEEEQKSEStMsPSENVSR;SESTMsPSENVSR;SESTMsPsENVSR	0.9398	0.9306	0.9398	0.918	0.9369	0.933	0	0	0	0.3181	0.7835	0	0.1888	0	0	0	0.9051	0.7216	0.3258	0	0	153515344	139900960	98295472	131603600	148097424	0	4731659	0	9338576	1.61086e+06	0	0	0	0	0	58541288	825590	33481520	0	0	81514400	48118044	44240624	68430560
Q9R1M5_S134	Nlrp5	sp|Q9R1M5|NALP5_MOUSE	Q9R1M5	GLEEEQKSEStMSPsENVSR;SESTMSPsENVSR;SESTMSPsENVsR;SESTMsPsENVSR	0.9305	0.6577	0.5759	0.8651	0.716	0.7501	0	0.9167	0.3458	0.3662	0.8767	0	0	0	0	0	0.9305	0.7593	0.4623	0.4511	0	107844872	129043872	16273720	2.63771e+06	49082524	0	4.462e+06	0	589292	0	0	0	0	0	0	63151380	16714750	832121	192277	0	134961200	19104188	16894652	4.15344e+06
Q9R1M5_S138	Nlrp5	sp|Q9R1M5|NALP5_MOUSE	Q9R1M5	GLEEEQKSESTMSPSENVsR;GLEEEQKSEStMSPSENVsR;GLEEEQKsESTMSPSENVsR;SESTMSPSENVsR;SESTMSPsENVsR	0.9355	0.7968	0.8797	0.8819	0.9123	0.8714	0	0.3125	0	0	0	0	0.6968	0	0	0	0.9063	0.9355	0.5272	0	0	51552844	139900960	85717320	68112240	100043864	0	0	198378	89379.4	0	0	3432373	0	0	0	59091212	19599924	2.04739e+06	0	0	6688409	42097136	21233606	8.36827e+06
Q9R1M5_S145	Nlrp5	sp|Q9R1M5|NALP5_MOUSE	Q9R1M5	AILKDsGSEEVEQASER;AILKDsGsEEVEQASER;DsGSEEVEQASER	0.9411	0.8794	0.823	0.9306	0.9325	0.9411	0.4905	0.7814	0.5277	0.4886	0.4881	0.8594	0.5613	0.3333	0.4797	0.3333	0.4892	0.6914	0.8733	0.9189	0.8836	10127694	12713699	13002625	13580722	15129797	1.66874e+06	1942769	934645	1702260	1.83564e+06	1381147	779622	538502	341328	168386	2602093	3.33902e+06	2662885	4536085	2.58071e+06	4.14479e+06	6011998	5.80064e+06	4615415
Q9R1M5_S147	Nlrp5	sp|Q9R1M5|NALP5_MOUSE	Q9R1M5	AILKDSGsEEVEQASER;AILKDsGsEEVEQASER;DSGsEEVEQASER	0.9411	0.7312	0.9055	0.8896	0.9126	0.9411	0.38	0	0.4531	0.922	0	0	0	0	0	0.4664	0	0	0.4271	0	0.7066	2.46115e+06	4.26863e+06	3748728	4429133	4483297	0	0	428638	480060	0	0	0	569763	0	0	0	0	1185951	0	768615	1.2464e+06	3187833	1.90786e+06	1.05314e+06
Q9R1M5_S154	Nlrp5	sp|Q9R1M5|NALP5_MOUSE	Q9R1M5	AILKDSGSEEVEQAsER;DSGSEEVEQAsER	0.9277	0.8589	0	0.7352	0.4713	0.9031	0.7528	0	0	0	0.3803	0	0.6655	0.6085	0	0	0	0.5371	0	0.7337	0.3985	2.25139e+06	0	5.33098e+06	0	4832507	1.19948e+06	0	0	0	553422	0	424288	528813	294793	534583	0	811831	0	0	0	4257674	0	3.81967e+06	0
Q9R1M5_S180	Nlrp5	sp|Q9R1M5|NALP5_MOUSE	Q9R1M5	DQGPEQEQTsETLQSK;DQGPEQEQTsETLQSKEEDEVTEADK;DQGPEQEQTsETLQSKEEDEVtEADK;DQGPEQEQtsETLQSK;DQGPEQEQtsETLQSKEEDEVTEADK;DQGPEQEQtsEtLQSKEEDEVTEADK	0.937	0.6455	0.937	0.7262	0.897	0.5	0	0	0	0	0.4	0	0	0	0	0	0.3264	0	0.4	0	0	6633656	26029944	20597802	24572654	4533085	306253	0	0	0	0	0	519341	0	0	0	2.11043e+06	0	549292	0	0	7.67938e+06	8951215	11736711	7812523
Q9R1M5_S185	Nlrp5	sp|Q9R1M5|NALP5_MOUSE	Q9R1M5	DQGPEQEQTSETLQsK;DQGPEQEQTSETLQsKEEDEVTEADK;DQGPEQEQTSETLQsKEEDEVtEADK;DQGPEQEQTSEtLQsK;DQGPEQEQTSEtLQsKEEDEVTEADK	0.9305	0.7869	0.4678	0.4093	0.9305	0.8541	0	0.2731	0	0	0.5899	0	0	0	0	0	0.7695	0.8024	0	0	0.6134	6414071	8.15386e+06	14830020	23951534	23088828	0	1.59635e+06	0	0	812971	0	0	0	0	0	3.19478e+06	4.39841e+06	0	0	2.49947e+06	8732824	6564323	20191224	10883358
Q9R1M5_S29	Nlrp5	sp|Q9R1M5|NALP5_MOUSE	Q9R1M5	KMTsPENDSK;MTsPENDSK	0.9408	0	0	0	0.9386	0	0	0	0	0	0	0	0	0	0	0	0	0	0	0	0	0	0	0	16865922	0	0	0	0	0	0	0	0	0	0	0	0	0	0	0	0	0	0	0	17022170
Q9R1M5_S34	Nlrp5	sp|Q9R1M5|NALP5_MOUSE	Q9R1M5	KMTSPENDsK;MTSPENDsK	0.9417	0.9386	0.9147	0.9317	0.9348	0.5805	0	0	0	0	0	0	0	0	0	0	0	0	0	0	0	7.74706e+06	23279244	29647144	17932886	11375702	0	0	0	0	0	0	0	0	0	0	0	0	506911	0	0	8201627	6031465	5.27317e+06	7.85688e+06
Q9R1M5_T130	Nlrp5	sp|Q9R1M5|NALP5_MOUSE	Q9R1M5	GLEEEQKSEStMSPSENVsR;GLEEEQKSEStMSPsENVSR;GLEEEQKSEStMsPSENVSR;GLEEEQKsEstMSPSENVSR;SEStMSPSENVSR	0.9382	0.4823	0.8571	0.5	0.8082	0.6095	0	0	0	0.2901	0.4797	0	0	0	0	0	0	0.9286	0.4798	0.3254	0	44706104	4.33765e+06	72411176	2732857	92397440	0	0	198378	9338576	1.40734e+06	0	0	0	0	0	0	16430973	33055934	913077	0	7452850	4.41664e+06	9806714	2.62192e+06
Q9R1M5_T179	Nlrp5	sp|Q9R1M5|NALP5_MOUSE	Q9R1M5	DQGPEQEQtSETLQSK;DQGPEQEQtSETLQSKEEDEVTEADK;DQGPEQEQtsETLQSK;DQGPEQEQtsETLQSKEEDEVTEADK;DQGPEQEQtsEtLQSKEEDEVTEADK	0.897	0.6455	0.6156	0.7262	0.897	0.8481	0.2678	0.3284	0.3242	0.25	0.6993	0	0	0	0	0	0.7471	0.6729	0.4757	0.4727	0.4658	19785026	26462242	31527000	24572654	28617448	2.99907e+06	1584505	2.42825e+06	1.58562e+06	1.60636e+06	0	0	495843	0	0	5.01294e+06	4067528	8521534	6.09356e+06	5.32092e+06	9586535	11955715	15265336	11537660
Q9R1M5_T182	Nlrp5	sp|Q9R1M5|NALP5_MOUSE	Q9R1M5	DQGPEQEQTSEtLQSK;DQGPEQEQTSEtLQSKEEDEVTEADK;DQGPEQEQTSEtLQsK;DQGPEQEQTSEtLQsKEEDEVTEADK;DQGPEQEQtsEtLQSKEEDEVTEADK	0.9299	0.9299	0.6	0.6	0.8966	0.4844	0	0.4719	0	0.4457	0	0	0	0	0	0	0.2425	0.7716	0	0	0	9527694	16782258	10167555	24572654	14573029	0	1584505	0	1.2451e+06	0	0	268181	0	270936	358596	1.65042e+06	4.75359e+06	1.55124e+06	2184394	0	10018535	9781491	10818374	10699534
Q9R1M5_T192	Nlrp5	sp|Q9R1M5|NALP5_MOUSE	Q9R1M5	DQGPEQEQTSETLQSKEEDEVtEADK;DQGPEQEQTSETLQSKEEDEVtEADKDNGGDLQDYK;DQGPEQEQTSETLQsKEEDEVtEADK;DQGPEQEQTsETLQSKEEDEVtEADK;EEDEVtEADK	1	0.7267	0.8607	1	1	0.9308	0	0.5838	0.6208	0.366	0.7857	0	0	0	0	0	0.8184	0.8024	0.546	0.8734	0.8779	2.13822e+06	7.58595e+06	14830020	10536119	13536260	0	1.59635e+06	1.64151e+06	1.2451e+06	812971	0	522612	0	0	0	3.19478e+06	330882	3.47686e+06	2.15355e+06	2.95579e+06	2.3777e+06	8.06262e+06	16490984	11716165
Q9R1M5_T28	Nlrp5	sp|Q9R1M5|NALP5_MOUSE	Q9R1M5	KMtSPENDSK;MtSPENDSK	0.9386	0.933	0.9386	0.4902	0.9233	0.9069	0	0	0.39	0	0	0	0	0	0	0	0	0.3333	0	0	0	13701604	30944412	29647144	26651438	24491706	0	100007	165258	75547.1	0	0	0	0	0	0	0	279303	410720	267168	0	5.88902e+06	7.69981e+06	6016195	10754825
Q9R1T2_S189	Sae1	sp|Q9R1T2|SAE1_MOUSE	Q9R1T2	VsQGVEDGPEAK	1	1	1	0	1	0	0	0	0	0	0	0	0	0	0	0	1	1	0	0	0	163359	0	193362	138187	137056	0	0	0	0	0	0	0	0	0	0	0	0	0	0	0	163359	0	193362	138187
Q9WTP2_S126	Spry4	sp|Q9WTP2|SPY4_MOUSE	Q9WTP2	LLDHMAPPPVAEQAsPR	1	1	0	1	1	1	1	0	0	0	0	0	0	0	0	0	0	0	0	0	0	221827	162148	292007	216793	414290	178032	166734	70693.6	212472	0	0	0	0	0	55561.5	190122	196474	78861.3	261272	201899	108930	67401.5	144134	102148
Q9WTQ5_S1351	Akap12	sp|Q9WTQ5|AKA12_MOUSE	Q9WTQ5	ALGsLEGSPSLPDQDK	0.921	0.921	0.3333	0.4908	0.3333	0.3333	0	0	0	0	0	0	0	0	0	0	0	0.5097	0.4848	0	0	1099784	1.2691e+06	1.72874e+06	0	1777634	0	0	0	0	0	0	0	0	0	0	0	696085	686222	0	0	1099784	1.2691e+06	1.72874e+06	0
Q9WTQ5_S1355	Akap12	sp|Q9WTQ5|AKA12_MOUSE	Q9WTQ5	ALGSLEGsPSLPDQDK;ALGSLEGsPsLPDQDK	0.8572	0	0	0	0	0.7611	0	0	0	0	0	0	0	0	0	0	0	0.4743	0	0.4537	0.4045	0	0	0	0	347334	0	0	0	0	0	0	0	0	0	0	743932	696085	0	350702	0	0	0	0	0
Q9WTQ5_S1357	Akap12	sp|Q9WTQ5|AKA12_MOUSE	Q9WTQ5	ALGSLEGSPsLPDQDK;ALGSLEGsPsLPDQDK	0.844	0	0	0	0	0.757	0	0	0	0	0	0	0	0	0	0	0	0	0	0	0	0	0	0	0	347334	0	0	0	0	0	0	0	0	0	0	0	0	0	0	0	0	0	0	0
Q9WTQ5_S244	Akap12	sp|Q9WTQ5|AKA12_MOUSE	Q9WTQ5	QAQSSTEIPLQAEsGQGTEEEAAK	0.7774	0	0.7774	0	0	0	0	0	0	0	0	0	0	0	0	0	0	0	0	0	0	0	129162	0	0	0	0	0	0	0	0	0	0	0	0	0	218890	0	0	0	0	0	129162	0	0
Q9WTQ5_S270	Akap12	sp|Q9WTQ5|AKA12_MOUSE	Q9WTQ5	EPtKPLEsPTSPVSNETTSSFK;PLEsPTSPVSNETTSSFK;PLEsPtSPVSNETTSSFK	0.9095	0.6347	0.7731	0.3781	0.4377	0.7173	0.3185	0.2774	0.4359	0.25	0.8722	0	0	0	0.125	0	0.4228	0.4629	0.4373	0.3892	0.7842	1.26988e+06	2.07819e+06	2425885	2.77677e+06	1.74012e+06	1.10198e+06	1.52137e+06	1.00017e+06	975789	1094065	0	0	0	0	0	1.90566e+06	1.7901e+06	2.1926e+06	1.31216e+06	827555	1.62509e+06	1192234	1.41347e+06	1.58073e+06
Q9WTQ5_S273	Akap12	sp|Q9WTQ5|AKA12_MOUSE	Q9WTQ5	PLESPTsPVsNETTSSFK	0.7571	0	0.3188	0	0	0	0	0	0	0	0	0	0	0	0	0	0	0	0	0	0	0	1.16818e+06	0	0	0	0	0	0	0	0	0	0	0	0	0	0	0	0	0	0	0	1.16818e+06	0	0
Q9WTQ5_S276	Akap12	sp|Q9WTQ5|AKA12_MOUSE	Q9WTQ5	PLESPTsPVsNETTSSFK	0.7571	0	0.3188	0	0	0	0	0	0	0	0	0	0	0	0	0	0	0	0	0	0	0	1.16818e+06	0	0	0	0	0	0	0	0	0	0	0	0	0	0	0	0	0	0	0	1.16818e+06	0	0
Q9WTQ5_S498	Akap12	sp|Q9WTQ5|AKA12_MOUSE	Q9WTQ5	VQGsPLKK	1	0	1	0	0	0	0	0	0	0	0	0	0	0	0	0	0	0	0	0	0	0	392523	0	0	193507	0	0	0	0	0	0	0	0	0	0	0	0	0	0	0	0	392523	0	0
Q9WTQ5_S570	Akap12	sp|Q9WTQ5|AKA12_MOUSE	Q9WTQ5	GPsEAPQEAEAEEGATSDGEK	0.9343	0.4873	0.3333	0.7437	0	0.3333	0.3333	0.423	0.3333	0	0	0.3333	0.9128	0.3333	0.734	0.4789	0.3333	0.8	0.3333	0.3898	0.3333	1263002	1.91191e+06	1.35354e+06	0	708113	1.20759e+06	1.46519e+06	0	0	369568	433325	2304059	2010690	909693	687435	0	921010	1.52718e+06	781868	423728	754052	1.1276e+06	845571	0
Q9WTQ5_S584	Akap12	sp|Q9WTQ5|AKA12_MOUSE	Q9WTQ5	GPSEAPQEAEAEEGATsDGEK	0.9278	0.8038	0.6685	0	0	0	0	0	0	0.8896	0.87	0	0	0	0	0	0	0	0	0	0	358948	620977	0	0	0	0	0	1.29446e+06	1.96724e+06	369568	0	0	0	0	0	0	0	0	0	0	485547	839993	0	0
Q9WTQ5_S767	Akap12	sp|Q9WTQ5|AKA12_MOUSE	Q9WTQ5	AEDsGAEQLASEIEPSR;AEDsGAEQLASEIEPSREESWVSIK	0.9186	0	0	0.6196	0	0	0	0	0	0	0	0	0	0	0	0	0	0	0	0.3333	0	0	0	192542	0	223193	0	0	0	0	0	0	0	0	0	0	0	0	0	0	0	0	0	193016	0
Q9WTQ5_T1186	Akap12	sp|Q9WTQ5|AKA12_MOUSE	Q9WTQ5	QSQVTEEEAAAAQtEGPSTPSSFPAQEEHR	0.8178	0.2364	0	0	0	0.1827	0	0.178	0	0	0	0	0	0	0	0	0	0	0	0	0	1.50033e+06	0	0	0	2.05116e+06	0	559356	0	0	0	0	0	0	0	0	0	0	0	0	0	1.50033e+06	0	0	0
Q9WTQ5_T265	Akap12	sp|Q9WTQ5|AKA12_MOUSE	Q9WTQ5	EPtKPLESPTSPVSNETTSSFK;EPtKPLEsPTSPVSNETTSSFK	0.8319	0	0.2222	0.445	0.4377	0.4699	0.2616	0.2222	0.4359	0.2414	0.3357	0	0	0	0	0	0.4228	0.4629	0.5449	0.3892	0.7842	0	1.06178e+06	1.49313e+06	1.36439e+06	766215	789879	733671	692526	759373	764179	0	0	0	113001	152885	1213267	1.7007e+06	1.57718e+06	1.31216e+06	1.0177e+06	0	901452	1.26767e+06	1.15837e+06
Q9WTQ5_T272	Akap12	sp|Q9WTQ5|AKA12_MOUSE	Q9WTQ5	PLESPtSPVSNETTSSFK;PLEsPtSPVSNETTSSFK	0.9074	0.6347	0.7731	0.2436	0.25	0.597	0.2589	0.25	0.2753	0.25	0	0	0	0	0	0	0.2858	0	0.3291	0	0.25	1.26988e+06	1.01642e+06	932755	1.41238e+06	973906	474817	0	518660	437326	0	0	0	0	0	0	765908	256809	615416	0	0	1.26988e+06	1.01642e+06	932755	1.41238e+06
Q9WTQ5_T330	Akap12	sp|Q9WTQ5|AKA12_MOUSE	Q9WTQ5	tEPAPAEEQEPAEGTDQARLSADYEK	0.9221	0	0	0.8346	0.4768	0	0	0	0	0	0	0	0	0	0	0	0	0.3843	0	0.6087	0	0	0	2602424	1.74235e+06	0	0	0	0	0	0	0	0	0	0	0	0	1858486	0	1.72447e+06	0	0	0	2602424	1.74235e+06
Q9WTQ5_T344	Akap12	sp|Q9WTQ5|AKA12_MOUSE	Q9WTQ5	TEPAPAEEQEPAEGtDQARLSADYEK	0.9229	0.7684	0.6613	0.6087	0.3277	0	0.3293	0.7327	0.7791	0	0.4178	0	0	0	0	0	0	0	0.3037	0	0	1971248	1.61967e+06	2602424	1.74235e+06	0	870062	813031	909583	979585	644190	489686	332988	0	313242	0	0	0	1.02782e+06	1.72447e+06	0	1971248	1.61967e+06	2602424	1.74235e+06
Q9WTQ5_T583	Akap12	sp|Q9WTQ5|AKA12_MOUSE	Q9WTQ5	GPSEAPQEAEAEEGAtSDGEK	0.906	0	0.4794	0.4899	0.9046	0.4865	0	0.4283	0	0	0.4508	0.4314	0	0	0	0.481	0.3878	0	0	0.4717	0	0	1.91191e+06	1.15414e+06	1.76061e+06	2.18546e+06	499672	289021	0	1.65909e+06	816807	1.60664e+06	313393	0	0	295762	1.04516e+06	0	0	781868	904641	0	1.24094e+06	759374	1.14101e+06
Q9WTQ5_Y353	Akap12	sp|Q9WTQ5|AKA12_MOUSE	Q9WTQ5	TEPAPAEEQEPAEGTDQARLSADyEK	0.9124	0	0	0	0	0	0	0.6357	0	0	0	0	0	0	0	0	0	0	0	0	0	0	0	0	0	0	0	813031	0	0	0	0	0	0	0	0	0	0	0	0	930607	0	0	0	0
Q9WTQ5_Y533	Akap12	sp|Q9WTQ5|AKA12_MOUSE	Q9WTQ5	GGGGGDEEPGEyQHIQTESPESADEQK;RGGGGGDEEPGEyQHIQTESPESADEQK	0.8831	0	0	0	0	0.25	0	0	0	0	0	0	0	0	0	0	0	0	0	0	0	0	0	0	0	94157.1	0	0	0	0	0	0	0	0	0	0	0	0	0	0	0	0	0	0	0
Q9WTR6_S26	Slc7a11	sp|Q9WTR6|XCT_MOUSE	Q9WTR6	LPsMGDQEPPGQEK	1	0	1	1	1	0	0	0	0	0	0	0	0	0	0	0	0	0	0	0	0	0	182174	0	0	0	0	0	0	0	0	0	0	0	0	0	0	0	0	0	0	0	182174	0	0
Q9WTX5_T131	Skp1	sp|Q9WTX5|SKP1_MOUSE	Q9WTX5	GKtPEEIRK	1	0	0	0	0	0	0	0	0	0	0	0	0	0	0	0	0	0	1	0	0	0	0	0	0	0	0	191329	209565	228045	198789	0	0	0	0	0	187020	250436	204224	202178	0	0	0	0	0
Q9WU78_S718	Pdcd6ip	sp|Q9WU78|PDC6I_MOUSE	Q9WU78	EPsAPSIPPPAYQSSPAAGHAAAPPTPAPR	0.8321	0	0	0.1667	0.1971	0.1976	0.8321	0.42	0.1991	0.4717	0.2052	0	0	0	0	0	0.2757	0.7199	0.4443	0.366	0.4591	0	0	781047	769212	1.1554e+06	2.29725e+06	3.62862e+06	2908889	1.98295e+06	2606376	0	0	0	0	0	2.93035e+06	4786595	4.10349e+06	4127691	4065991	0	0	711915	1.42176e+06
Q9WU78_T741	Pdcd6ip	sp|Q9WU78|PDC6I_MOUSE	Q9WU78	EPSAPSIPPPAYQSSPAAGHAAAPPtPAPR	0.9166	0	0	0	0.7748	0	0.9048	0.7753	0.8372	0	0.8562	0	0	0	0	0	0.76	0	0.9091	0.7337	0	237648	0	0	1.6905e+06	538482	1.82116e+06	2.34419e+06	1.97328e+06	0	1.69507e+06	0	0	0	0	0	3.45078e+06	0	3017056	2.67559e+06	0	238744	0	0	1.69829e+06
Q9WVB3_S115	Tle6	sp|Q9WVB3|TLE6_MOUSE	Q9WVB3	QVPEsAALQHPK	1	1	1	1	1	1	1	1	1	1	1	0	0	0	0	0	1	1	1	1	1	1.51403e+06	1.88045e+06	2.30025e+06	1.80235e+06	979188	1.19045e+06	725223	875420	1.10693e+06	989383	0	0	0	0	0	2072828	2.76399e+06	2607515	2.79495e+06	1.99402e+06	921864	1.14582e+06	1.46557e+06	1.11658e+06
Q9WVB3_S125	Tle6	sp|Q9WVB3|TLE6_MOUSE	Q9WVB3	FKsTPGPQLPTR;FKstPGPQLPTR;sTPGPQLPTR	0.9433	0.9167	0.9433	0.7456	0.8877	0.9327	0.9238	0.9241	0.9242	0.8774	0.9273	0.481	0.4906	0.3333	0.4882	0.4847	0.6039	0.8381	0.9314	0.934	0.6667	82533768	94501248	66375380	53984032	81609992	41346876	34682260	35185404	29186286	38088132	3.41095e+06	1.83137e+06	1.51273e+06	990100	983010	64537336	67766432	51046880	77033016	69304656	25471156	36141012	33984672	29501886
Q9WVB3_S17	Tle6	sp|Q9WVB3|TLE6_MOUSE	Q9WVB3	QSSDTFGGILPsTLSSR;TSHRQSSDTFGGILPsTLSSR	0.9033	0.2219	0	0.2418	0.2179	0.2446	0	0.221	0	0	0	0	0	0.1677	0.2059	0	0	0.2229	0.2428	0.2466	0	2.47418e+06	0	3.60347e+06	696990	3548486	0	330109	557967	0	0	0	0	3351886	2.44276e+06	0	395238	4.99868e+06	7034077	3.67527e+06	0	2.43265e+06	0	3.54299e+06	685292
Q9WVB3_S186	Tle6	sp|Q9WVB3|TLE6_MOUSE	Q9WVB3	NQQEHGGEDsSQESK;NQQEHGGEDsSQEsKDsGLCDFKPEPQPR;NQQEHGGEDssQESK;NQQEHGGEDssQESKDSGLCDFKPEPQPR;NQQEHGGEDssQESKDsGLCDFKPEPQPR;NQQEHGGEDssQEsKDSGLCDFKPEPQPR	0.9402	0.9304	0.6667	0.9214	0.6667	0.6667	0	0	0	0	0	0	0	0	0	0	0	0	0.3333	0	0	12660212	3.88427e+06	2.35809e+06	7179729	15648658	0	0	0	0	0	0	0	0	0	0	0	221027	0	181735	0	17622012	5.40659e+06	3.28227e+06	9592884
Q9WVB3_S187	Tle6	sp|Q9WVB3|TLE6_MOUSE	Q9WVB3	NQQEHGGEDSsQEsKDsGLCDFKPEPQPR;NQQEHGGEDssQESK;NQQEHGGEDssQESKDSGLCDFKPEPQPR;NQQEHGGEDssQESKDsGLCDFKPEPQPR;NQQEHGGEDssQEsKDSGLCDFKPEPQPR	0.9385	0	0.6667	0.9214	0.6667	0.6667	0	0	0	0	0	0	0	0	0	0	0	0	0	0	0	0	0	0	287897	0	0	0	0	0	0	0	0	0	0	0	0	0	0	0	0	0	0	0	0
Q9WVB3_S190	Tle6	sp|Q9WVB3|TLE6_MOUSE	Q9WVB3	NQQEHGGEDSSQEsK;NQQEHGGEDSSQEsKDsGLCDFKPEPQPR;NQQEHGGEDSsQEsKDsGLCDFKPEPQPR;NQQEHGGEDsSQEsKDsGLCDFKPEPQPR;NQQEHGGEDssQEsKDSGLCDFKPEPQPR	0.927	0	0	0.734	0	0	0	0	0	0	0	0	0	0	0	0	0	0	0	0	0	0	0	2.35809e+06	0	0	0	0	0	0	0	0	0	0	0	0	0	0	0	0	0	0	0	2.35809e+06	0
Q9WVB3_S20	Tle6	sp|Q9WVB3|TLE6_MOUSE	Q9WVB3	QSSDTFGGILPSTLsSR	0.9213	0	0	0	0.9213	0	0	0	0	0	0	0	0	0	0.4462	0	0	0	0	0	0	0	338367	0	5965301	0	0	0	0	0	0	0	0	0	2.44276e+06	0	0	701455	943388	0	0	0	338367	0	5965301
Q9WVB3_S209	Tle6	sp|Q9WVB3|TLE6_MOUSE	Q9WVB3	HRNsLSDSADPFLIK;HRNsLSDsADPFLIK;HRNsLsDSADPFLIK;NsLSDSADPFLIK	0.9407	0.9391	0.8866	0.9082	0.9376	0.9209	0.9268	0.9306	0.7213	0.9358	0.9257	0.893	0.862	0.9024	0.9251	0.9177	0.9212	0.9159	0.9148	0.9312	0.9116	7937640	5.26472e+06	8612442	15838276	23865080	29439264	30411546	26299174	31998044	31139094	15920460	17080696	22799040	19078864	14441896	28396738	34136204	27804268	34844056	41900116	3.68606e+06	1.83892e+06	5216022	9606779
Q9WVB3_S21	Tle6	sp|Q9WVB3|TLE6_MOUSE	Q9WVB3	QSSDTFGGILPSTLSsR	0.8846	0	0	0.4824	0	0	0	0	0	0	0	0	0.8846	0	0	0	0	0	0	0	0	0	0	725076	0	402383	0	0	0	0	0	0	2.77848e+06	0	0	0	0	0	0	0	0	0	0	725076	0
Q9WVB3_S211	Tle6	sp|Q9WVB3|TLE6_MOUSE	Q9WVB3	HRNSLsDSADPFLIK;HRNSLsDsADPFLIK;HRNsLsDSADPFLIK;NSLsDSADPFLIK	0.9397	0.9052	0.8866	0.6714	0.935	0.9385	0.9345	0.8027	0.9397	0.933	0.8969	0.9391	0.8427	0.9131	0.8984	0.9368	0.7926	0.9363	0.7649	0.9291	0.9287	7.22586e+06	4.47124e+06	7554883	11694692	13532687	28899608	26631398	25372498	29526628	20839348	15830060	15926516	18650696	6.75298e+06	13164132	15443308	34110108	28108796	20386672	40168748	3949705	2229377	5034587	7816859
Q9WVB3_S213	Tle6	sp|Q9WVB3|TLE6_MOUSE	Q9WVB3	HRNSLSDsADPFLIK;HRNSLsDsADPFLIK;HRNsLSDsADPFLIK;NSLSDsADPFLIK	0.9335	0.6821	0.6956	0.8803	0.8998	0.9023	0.9321	0.9292	0.8768	0.8165	0.9242	0.9126	0.668	0.9233	0.8226	0	0.9086	0.9017	0.914	0.9316	0.9038	2.00408e+06	4.40183e+06	8612442	8781375	15166466	29379038	17303864	10358541	5247178	30924874	15920460	8.1752e+06	16940034	12497535	1.3266e+06	28217120	23976238	27776396	23288974	41388728	2.08177e+06	2.05132e+06	4034119	7340142
Q9WVB3_S221	Tle6	sp|Q9WVB3|TLE6_MOUSE	Q9WVB3	sPSALLDYYQEDVSR;sPSALLDYYQEDVSRPQPETQESSGR;sPSALLDYYQEDVSRPQPEtQESSGR	0.9367	0.9303	0.4835	0.9357	0.9246	0.9323	0.9244	0.9349	0.9336	0.8555	0.7873	0.9356	0.4774	0.864	0.8261	0.9266	0.8485	0.9094	0.9161	0.9315	0.9341	73551376	36339908	171584544	295526464	228922048	72926720	54115796	50189316	40476964	74044576	8651439	14577657	15175966	15925654	12559945	106726232	92035704	91856672	144561808	125780528	60935692	29368642	128315696	174477760
Q9WVB3_S223	Tle6	sp|Q9WVB3|TLE6_MOUSE	Q9WVB3	SPsALLDYYQEDVSR;SPsALLDYYQEDVSRPQPETQESSGR	0.931	0	0	0.928	0	0.8912	0	0.8703	0	0	0.2621	0	0	0	0	0.8733	0.3835	0.8865	0	0.9117	0.9095	0	0	141928832	0	34849236	4.12496e+06	934234	3.99054e+06	3.39116e+06	61455064	2.38583e+06	2.34936e+06	4761552	4.29e+06	1.17625e+06	88157536	74829784	0	136273664	713169	0	0	119285936	0
Q9WVB3_S234	Tle6	sp|Q9WVB3|TLE6_MOUSE	Q9WVB3	SPSALLDYYQEDVsR;SPSALLDYYQEDVsRPQPETQESSGR	0.9186	0.458	0	0	0	0.9141	0	0	0.9154	0	0.8559	0	0.2506	0.2885	0	0.3906	0.8164	0	0.8999	0.886	0.8513	56327212	0	0	0	225379312	2.0977e+06	3091060	3.99054e+06	1.03558e+06	61501984	4.1005e+06	11222192	11604979	0	256207	32331138	3837514	74983776	82965944	9559720	57115144	0	0	0
Q9WVB3_S243	Tle6	sp|Q9WVB3|TLE6_MOUSE	Q9WVB3	SPSALLDYYQEDVSRPQPETQEsSGR	0.8712	0	0	0	0	0	0.4656	0	0	0	0	0	0	0	0	0	0	0	0	0	0	0	0	0	0	0	4.12496e+06	0	0	0	12570347	0	0	0	2.8249e+06	0	0	0	0	9561807	19179784	0	0	0	0
Q9WVB3_S3	Tle6	sp|Q9WVB3|TLE6_MOUSE	Q9WVB3	tsHRQSSDTFGGILPSTLSSR	0.8948	0.2833	0.3904	0.3924	0.8948	0.771	0	0.2222	0	0.3729	0.296	0	0	0	0	0	0.3905	0.3867	0.2864	0.8379	0.3796	490568	479482	1.05973e+06	1243949	747730	166873	185078	269126	417106	405584	0	0	0	125789	0	992019	641243	1.04618e+06	658605	555671	276377	515375	595207	689346
Q9WVB3_S7	Tle6	sp|Q9WVB3|TLE6_MOUSE	Q9WVB3	QsSDTFGGILPSTLSSR;TSHRQsSDTFGGILPSTLSSR;TSHRQssDTFGGILPSTLSSR	0.9196	0.8004	0.7526	0.4659	0.61	0.632	0.4661	0.4791	0.326	0.6987	0.4659	0.3262	0.3262	0.4564	0.3255	0.325	0.8312	0.8997	0.4499	0.7607	0.4771	4.65705e+06	6103572	6.37559e+06	17081790	4673580	5.43494e+06	2.16569e+06	2.35677e+06	7216715	6.91412e+06	2578294	2.77848e+06	7775430	9455494	5.72368e+06	10758661	12391682	10608806	8661842	3808517	1.93983e+06	3.51321e+06	4.51886e+06	7.34481e+06
Q9WVB3_S8	Tle6	sp|Q9WVB3|TLE6_MOUSE	Q9WVB3	QSsDTFGGILPSTLSSR;TSHRQSsDTFGGILPSTLSSR;TSHRQssDTFGGILPSTLSSR	0.9309	0	0	0.4659	0.61	0	0.3575	0	0	0.2323	0	0	0	0.8671	0	0	0	0	0	0.4652	0	90919.8	0	2.92506e+06	6.29127e+06	124963	1.59253e+06	0	1.56071e+06	238148	0	0	0	5.84482e+06	0	0	0	0	0	3.67527e+06	0	472156	0	1.153e+06	1.5229e+06
Q9WVB3_T10	Tle6	sp|Q9WVB3|TLE6_MOUSE	Q9WVB3	QSSDtFGGILPSTLSSR;TSHRQSSDtFGGILPSTLSSR	0.8948	0	0	0.1968	0.8198	0	0	0.862	0	0.8467	0.8597	0.616	0	0.4401	0	0	0.8029	0	0.6359	0.7652	0	397665	0	3.60347e+06	121434	475668	233226	7185810	0	2.72077e+06	2.30367e+06	2.84082e+06	0	3.63488e+06	0	0	2647072	0	6545311	3.8334e+06	889527	519884	0	4.71097e+06	158756
Q9WVB3_T126	Tle6	sp|Q9WVB3|TLE6_MOUSE	Q9WVB3	FKStPGPQLPTR;FKstPGPQLPTR;StPGPQLPTR	0.9433	0.6667	0.9433	0.6599	0.9367	0.9368	0.9298	0.9111	0	0.9349	0.9235	0	0	0	0	0	0.9297	0.912	0.9314	0.8914	0.9112	7.19717e+06	25095554	2.88007e+06	19260078	32460134	11177609	16869424	3.1888e+06	13130509	13461866	0	0	0	0	231538	9829177	35318148	8675434	18542960	16540316	2.09597e+06	1.54796e+06	6874432	2.83129e+06
Q9WVB3_T133	Tle6	sp|Q9WVB3|TLE6_MOUSE	Q9WVB3	FKSTPGPQLPtR;STPGPQLPtR	0.9399	0	0.9323	0.913	0.9391	0.936	0.9293	0.9139	0.9247	0.9258	0.9126	0	0.5541	0	0	0	0.925	0.9118	0.9321	0.9382	0.9273	0	91727448	48268576	44861840	65890296	34484944	30340414	35185404	23153188	36090928	801296	1.09208e+06	278556	91467.4	77335.4	36916532	62699720	51046880	71362408	58302768	0	29618498	16839226	16607399
Q9WVB3_T18	Tle6	sp|Q9WVB3|TLE6_MOUSE	Q9WVB3	QSSDTFGGILPStLSSR	0.9138	0	0	0	0	0	0	0	0	0	0.1977	0	0	0	0	0	0	0	0	0	0	0	0	0	0	0	0	0	0	0	1596297	0	0	0	0	0	0	0	0	277004	0	0	0	0	0
Q9WVB3_T2	Tle6	sp|Q9WVB3|TLE6_MOUSE	Q9WVB3	tSHRQSSDTFGGILPSTLSSR;tsHRQSSDTFGGILPSTLSSR	0.8948	0.3818	0.3904	0.3924	0.8948	0.771	0.2138	0.2386	0.2354	0.3729	0.296	0.2363	0.1979	0.254	0.2563	0.2352	0.3905	0.3867	0.3561	0.8379	0.3796	1.15933e+06	1.60407e+06	3.44964e+06	5379927	3420225	1.98373e+06	1.90475e+06	1.70093e+06	1777828	2.3015e+06	2.62781e+06	2374893	3.63488e+06	2.47176e+06	1.37641e+06	3639091	2.80048e+06	3.87214e+06	3.31893e+06	2.59547e+06	944959	1.49569e+06	2541452	3.54727e+06
Q9WVB3_T240	Tle6	sp|Q9WVB3|TLE6_MOUSE	Q9WVB3	SPSALLDYYQEDVSRPQPEtQESSGR;sPSALLDYYQEDVSRPQPEtQESSGR	0.9105	0.7636	0	0.3119	0.4702	0.3193	0	0	0.9105	0.3124	0.8653	0.9041	0.2596	0.3145	0.2897	0.2005	0.4279	0	0.9027	0.7723	0.3143	2.84166e+06	7108603	140325360	281680864	48909320	0	0	48805932	31128848	61455064	11593197	3308728	12101654	12934539	8965027	103044608	18525396	19959964	103883288	101290528	116840624	18273374	135440896	172472720
Q9WVB3_Y228	Tle6	sp|Q9WVB3|TLE6_MOUSE	Q9WVB3	SPSALLDyYQEDVSR;SPSALLDyYQEDVSRPQPETQESSGR	0.9222	0.461	0	0	0.8807	0.8911	0.1627	0.1655	0.1619	0.9066	0	0.4739	0	0	0.2145	0	0.3407	0.294	0.8855	0.4733	0.9069	56226040	0	0	3.52672e+06	192703616	46333708	44910932	1.38338e+06	30418064	0	8651439	3.86879e+06	207844	4.29e+06	0	90824008	74829784	77302792	117369392	101290528	47402580	0	0	50549780
Q9WVB3_Y229	Tle6	sp|Q9WVB3|TLE6_MOUSE	Q9WVB3	SPSALLDYyQEDVSR;SPSALLDYyQEDVSRPQPETQESSGR	0.9179	0.5861	0	0.458	0	0	0	0.5314	0	0	0	0	0	0	0	0	0	0	0.4144	0	0	5134114	0	140325360	0	0	0	44910932	0	0	0	0	0	0	0	0	32331138	0	48005888	82965944	0	5134114	0	140325360	0
Q9WVL3_S50	Slc12a7	sp|Q9WVL3|S12A7_MOUSE	Q9WVL3	ENsPFINNVEVER	1	1	1	1	1	1	0	0	0	0	0	0	0	0	0	0	0	0	0	1	0	200163	250010	191376	0	435869	0	0	0	0	0	0	0	0	0	0	0	0	0	240859	0	214264	267624	204858	0
Q9Z0F8_S360	Adam17	sp|Q9Z0F8|ADA17_MOUSE	Q9Z0F8	ANsHGGVCPKAYYNPTVK	0.9099	0	0	0	0	0.9099	0	0	0	0	0	0	0	0	0	0	0	0	0	0	0	5155030	0	0	4904113	4059688	0	0	0	0	0	0	0	0	0	0	0	0	0	0	0	5155030	0	0	4904113
Q9Z0F8_T373	Adam17	sp|Q9Z0F8|ADA17_MOUSE	Q9Z0F8	ANSHGGVCPKAYYNPtVK	0.939	0	0	0	0	0	0	0	0	0	0	0	0	0	0	0	0	0	0	0	0	0	6746360	3.19497e+06	0	4.11348e+06	0	0	0	0	0	0	0	0	0	0	0	0	0	0	0	0	6746360	3.19497e+06	0
Q9Z0F8_T735	Adam17	sp|Q9Z0F8|ADA17_MOUSE	Q9Z0F8	PFPAPQtPGR	1	0	0	0	0	0	0	0	0	0	0	0	0	0	0	0	0	1	0	0	0	0	0	0	0	0	0	0	0	0	0	0	0	0	0	0	68607.5	167140	199067	98692.7	137596	0	0	0	0
Q9Z0H8_S293	Clip2	sp|Q9Z0H8|CLIP2_MOUSE	Q9Z0H8	IGFPsTSPAK	0.7828	0	0.3333	0	0	0	0	0	0	0	0	0	0	0	0	0	0	0	0	0	0	0	95520.6	97398.9	0	0	0	0	0	0	0	0	0	0	0	0	0	0	0	0	0	0	95520.6	97398.9	0
Q9Z0X4_S470	Pde3a	sp|Q9Z0X4|PDE3A_MOUSE	Q9Z0X4	PHEAPsPSAVNPDSWNAPGLTTLTK	0.859	0	0	0	0.3239	0.4104	0	0	0	0	0	0	0	0	0	0	0	0	0	0	0	136086	0	0	287744	207847	0	0	0	0	0	0	0	0	0	0	0	0	0	0	0	136086	0	0	287744
Q9Z1D1_T38	Eif3g	sp|Q9Z1D1|EIF3G_MOUSE	Q9Z1D1	GIPLPtGDTSPEPELLPGDPLPPPK	0.9155	0	0	0	0.3333	0.9155	0	0	0	0	0	0	0	0	0	0	0	0	0	0	0	101966	0	293088	289993	694448	0	0	0	0	0	0	0	0	0	0	0	0	0	0	0	101966	0	293088	289993
Q9Z1F9_S548	Uba2	sp|Q9Z1F9|SAE2_MOUSE	Q9Z1F9	DVEFEVVGDsPEK	1	1	0	0	1	1	0	0	0	0	0	0	0	0	0	0	0	0	0	0	0	0	0	0	161319	192813	0	0	0	0	0	0	0	0	0	0	0	0	0	0	0	0	0	0	161319
Q9Z1S0_S502	Bub1b	sp|Q9Z1S0|BUB1B_MOUSE	Q9Z1S0	EIsPAENILQEQPDSK;EIsPAENILQEQPDsK	1	0.9405	0.9412	1	1	1	0	0	0	0	0	0	0	0	0	0	0	0	0	0	0	1.45259e+06	832267	1.5683e+06	1360855	1419628	0	0	0	0	0	0	0	0	0	0	0	0	0	0	0	949564	822397	1.5497e+06	817338
Q9Z1S0_S514	Bub1b	sp|Q9Z1S0|BUB1B_MOUSE	Q9Z1S0	EISPAENILQEQPDsK;EIsPAENILQEQPDsK	1	0.9311	0	1	1	1	0	0	0	0	0	0	0	0	0	0	0	0	0	0	0	1.80211e+06	0	1069366	1.92654e+06	2.13225e+06	0	0	0	0	0	0	0	0	0	0	0	92320.9	0	0	0	1.13464e+06	0	967496	1.22302e+06
Q9Z1S0_S535	Bub1b	sp|Q9Z1S0|BUB1B_MOUSE	Q9Z1S0	DKsPATGGPQVLNAQR;sPATGGPQVLNAQR	0.9434	0.9296	0.9266	0.94	0.9399	0.9394	0	0	0	0	0	0	0	0	0	0	0	0.5	0	0	0.5	1.67162e+06	2.82349e+06	2.85713e+06	2.58045e+06	2246242	0	0	0	0	0	0	0	0	0	0	0	0	0	326764	204183	1.67162e+06	2.82349e+06	2.85713e+06	2.58045e+06
Q9Z1S0_S659	Bub1b	sp|Q9Z1S0|BUB1B_MOUSE	Q9Z1S0	KLsPIIEESR	0.9426	0.9377	0.9426	0.9287	0.9282	0.9333	0	0	0	0	0	0	0	0	0	0	0	0	0	0	0	1.03152e+06	979938	1.31103e+06	1.18898e+06	1.80671e+06	118386	56373.7	0	84740.8	74221.4	0	0	0	0	0	95598.1	191389	45993.3	165406	0	1.03152e+06	979938	1.31103e+06	1.18898e+06
Q9Z1S0_S665	Bub1b	sp|Q9Z1S0|BUB1B_MOUSE	Q9Z1S0	KLSPIIEEsR	0.9299	0	0	0.5263	0.9299	0	0	0	0	0	0	0	0	0	0	0	0	0	0	0	0	0	0	1.31103e+06	1.18898e+06	0	0	0	0	0	0	0	0	0	0	0	0	0	0	0	0	0	0	1.31103e+06	1.18898e+06
Q9Z1S0_T538	Bub1b	sp|Q9Z1S0|BUB1B_MOUSE	Q9Z1S0	DKSPAtGGPQVLNAQR	0.8938	0	0.6211	0	0	0	0	0	0	0	0	0	0	0	0	0	0	0	0.7166	0	0	0	2307134	296225	0	0	0	0	0	0	0	0	0	0	0	0	0	0	0	0	0	0	2307134	296225	0
Q9Z1T1_S610	Ap3b1	sp|Q9Z1T1|AP3B1_MOUSE	Q9Z1T1	PAPLLEsPFK	1	0	0	0	0	1	0	0	0	0	0	0	0	0	0	0	0	0	0	0	0	0	0	0	0	49808.7	0	0	0	0	0	0	0	0	0	0	0	0	0	0	0	0	0	0	0
Q9Z1T6_S1968	Pikfyve	sp|Q9Z1T6|FYV1_MOUSE	Q9Z1T6	NVKTDtGKEsCDVVLLDENLLK	0.7612	0	0	0	0	0	0	0	0	0	0	0	0	0	0	0	0	0	0	0	0	0	0	0	323255	197804	0	0	0	0	0	0	0	0	0	0	0	0	0	0	0	0	0	0	323255
Q9Z1T6_S305	Pikfyve	sp|Q9Z1T6|FYV1_MOUSE	Q9Z1T6	sASITNLSLDR	0.81	0	0	0	0	0	0	0	0	0	0	0	0	0	0	0	0	0	0	0	0	0	0	101255	0	111580	0	0	0	0	0	0	0	0	0	0	0	0	0	0	0	0	0	101255	0
Q9Z1T6_T1964	Pikfyve	sp|Q9Z1T6|FYV1_MOUSE	Q9Z1T6	NVKTDtGKEsCDVVLLDENLLK	0.7612	0	0	0	0	0	0	0	0	0	0	0	0	0	0	0	0	0	0	0	0	0	0	0	323255	197804	0	0	0	0	0	0	0	0	0	0	0	0	0	0	0	0	0	0	323255
Q9Z1Z0_S940	Uso1	sp|Q9Z1Z0|USO1_MOUSE	Q9Z1Z0	DLGHPVEEEDEsGDQEDDDDEIDDGDK;DLGHPVEEEDEsGDQEDDDDEIDDGDKDQDI	1	1	1	1	1	1	1	1	1	1	1	1	1	1	1	1	1	1	1	1	1	3280010	2.49125e+06	4371496	3069478	3148935	455834	941108	769174	471742	515424	0	808534	1.01441e+06	311284	0	876625	848831	567946	1.74292e+06	1.12758e+06	1.39071e+06	1.05898e+06	1.94071e+06	1.34047e+06
Q9Z2A0_S244	Pdpk1	sp|Q9Z2A0|PDPK1_MOUSE	Q9Z2A0	ANsFVGTAQYVSPELLTEK	0.9186	0.2	0.2	0.3004	0.9144	0.3226	0	0.2	0	0	0.5012	0	0	0	0.2	0	0.2327	0.7391	0	0.4331	0	164618	0	414604	0	581557	0	291070	351229	0	396732	490269	406420	0	307178	151557	212867	351662	0	467523	256331	182176	0	69346.2	0
Q9Z2A0_S37	Pdpk1	sp|Q9Z2A0|PDPK1_MOUSE	Q9Z2A0	SQTEPGsSPGIPSGVSR	0.8406	0.8406	0	0.8066	0	0.2467	0.244	0.3194	0	0.4778	0	0	0	0	0	0	0	0.4336	0.4788	0	0	431898	0	724677	0	647049	651818	613591	0	600892	0	0	0	0	0	0	0	833284	800554	0	0	431898	0	724677	0
Q9Z2A0_S46	Pdpk1	sp|Q9Z2A0|PDPK1_MOUSE	Q9Z2A0	SQTEPGSSPGIPSGVsR	0.9259	0.6147	0	0	0	0	0	0	0	0	0	0	0	0	0	0	0.8705	0	0	0	0	431898	0	0	0	0	0	0	0	0	0	0	0	0	0	0	788042	0	0	0	0	431898	0	0	0
Q9Z2A0_T248	Pdpk1	sp|Q9Z2A0|PDPK1_MOUSE	Q9Z2A0	ANSFVGtAQYVSPELLTEK	0.8657	0.8657	0	0	0	0	0	0	0	0	0	0	0	0.246	0	0	0	0	0	0	0	164618	0	0	0	0	0	0	0	0	0	0	0	0	0	0	0	0	0	0	0	0	0	0	0
Q9Z2A7_S40	Dgat1	sp|Q9Z2A7|DGAT1_MOUSE	Q9Z2A7	DAAVsPDLGAGGDAPAPAPAPAHTR	0.9339	0	0	0.6669	0.587	0.7403	0	0	0	0	0	0	0	0	0	0	0	0	0	0	0	0	0	207620	173805	193096	0	0	0	0	0	0	0	0	0	0	0	0	0	0	0	0	0	207620	173805
Q9Z2C8_S139	Ybx2	sp|Q9Z2C8|YBOX2_MOUSE	Q9Z2C8	FLRsVGDGETVEFDVVEGEK;sVGDGETVEFDVVEGEK	0.9241	0.5	0.6748	0.5	0.9098	0.9023	0.8586	0.9164	0.5	0.5292	0.8199	0	0	0	0	0	0.6934	0.8554	0.8838	0.9241	0.8257	470606	340321	501756	529621	504122	2697951	3.33661e+06	718968	930757	3.77928e+06	0	0	0	0	0	912000	2.35337e+06	3.84195e+06	1.0496e+06	1.15834e+06	470606	340321	501756	529621
Q9Z2C8_S203	Ybx2	sp|Q9Z2C8|YBOX2_MOUSE	Q9Z2C8	PAAPPPMVAEAPsGGTEPGSEGER;PAAPPPMVAEAPsGGTEPGSEGERAEDSGQRPR;PAAPPPMVAEAPsGGTEPGSEGERAEDsGQRPR;PRPAAPPPMVAEAPsGGTEPGSEGER	0.9381	0.7551	0.8842	0.4552	0.3333	0.7294	0.8942	0.826	0.8871	0.8783	0.933	0.7287	0.8959	0.8164	0.9101	0.5599	0.8597	0.8957	0.4917	0.9332	0.4923	5.29338e+06	6092257	4.64001e+06	4930535	4893768	9954287	7.53797e+06	7.11727e+06	5967603	7.09172e+06	7673052	10614486	12094502	7828212	8793523	14869559	15721477	5131740	20003546	13269262	4.06146e+06	3.31791e+06	2.48519e+06	2.93479e+06
Q9Z2C8_S210	Ybx2	sp|Q9Z2C8|YBOX2_MOUSE	Q9Z2C8	PAAPPPMVAEAPSGGTEPGsEGER;PAAPPPMVAEAPSGGTEPGsEGERAEDSGQRPR;PAAPPPMVAEAPSGGTEPGsEGERAEDsGQRPR;PAAPPPMVAEAPSGGtEPGsEGERAEDSGQRPR;PRPAAPPPMVAEAPSGGTEPGsEGER	0.9386	0.9324	0.9381	0.9322	0.9309	0.6177	0.9186	0.8906	0.9281	0.6542	0.9356	0.9296	0.6301	0.7658	0.9118	0.916	0.9357	0.5515	0.8943	0.835	0.9136	5.21892e+06	5096992	3.41172e+06	3.92491e+06	4.58534e+06	9270042	5276590	8313403	4.86049e+06	7.09172e+06	3.98554e+06	5769712	3.12141e+06	552283	5.52253e+06	8872883	8858168	4.24362e+06	6.8559e+06	8537414	3.74287e+06	3.11198e+06	2.52291e+06	3.00645e+06
Q9Z2C8_S218	Ybx2	sp|Q9Z2C8|YBOX2_MOUSE	Q9Z2C8	AEDsGQRPR;PAAPPPMVAEAPSGGTEPGSEGERAEDsGQRPR;PAAPPPMVAEAPSGGTEPGsEGERAEDsGQRPR;PAAPPPMVAEAPsGGTEPGSEGERAEDsGQRPR	1	0	0	0.3021	1	0.6177	0	0	0.4654	0	0.6766	0	0	0.5641	0.7696	0.8235	0.8453	0.7531	0.8353	0.8402	0.9136	2.10627e+06	307437	2818297	6201802	2.98911e+06	600652	356318	4179222	166873	3.55799e+06	0	1.54103e+06	6445344	4735357	2.33444e+06	9788856	8858168	4746410	7561615	2.98471e+06	1.21726e+06	355430	1.35057e+06	1.99148e+06
Q9Z2C8_S252	Ybx2	sp|Q9Z2C8|YBOX2_MOUSE	Q9Z2C8	GPRPPNQQQPIEGsDGVEPK	1	1	1	1	1	1	1	1	1	1	1	1	1	1	1	1	1	1	1	1	1	1.91267e+06	1.01924e+06	1.71643e+06	2.31855e+06	1.9477e+06	1802561	2355327	2.35411e+06	1.76492e+06	1.32576e+06	2.33751e+06	3171132	3.50588e+06	2943359	1.44032e+06	2.30837e+06	3.27274e+06	3.02936e+06	2.80434e+06	2.68328e+06	1.28905e+06	717524	1.25231e+06	1.63004e+06
Q9Z2C8_S76	Ybx2	sp|Q9Z2C8|YBOX2_MOUSE	Q9Z2C8	TPGNQATAAsGTPAPPAR;TPGNQATAAsGtPAPPAR;TPGNQAtAAsGTPAPPAR;tPGNQATAAsGTPAPPAR	0.9338	0.6794	0.6366	0.8061	0.9282	0.9189	0.5085	0.7951	0.479	0.6091	0.928	0	0	0	0	0	0.9127	0.6325	0.6272	0.6371	0.6365	12581877	16269622	13368106	26005576	13173020	10297867	10691902	3442528	0	10799814	0	0	0	0	0	17452326	11546036	18649096	14991123	8214492	3.95265e+06	7062649	5458381	9824571
Q9Z2C8_T145	Ybx2	sp|Q9Z2C8|YBOX2_MOUSE	Q9Z2C8	FLRSVGDGEtVEFDVVEGEK;SVGDGEtVEFDVVEGEK	0.9029	0.9029	0.77	0	0.6833	0.6134	0	0	0	0	0	0	0	0	0	0	0.7698	0	0.7539	0.7163	0	436965	365249	0	254862	504122	0	0	0	0	0	0	0	0	0	0	684858	0	180047	902945	0	430121	359528	0	250870
Q9Z2C8_T206	Ybx2	sp|Q9Z2C8|YBOX2_MOUSE	Q9Z2C8	PAAPPPMVAEAPSGGtEPGSEGER;PAAPPPMVAEAPSGGtEPGSEGERAEDSGQRPR;PAAPPPMVAEAPSGGtEPGsEGERAEDSGQRPR;PRPAAPPPMVAEAPSGGtEPGSEGER	0.9294	0.4875	0.4877	0.8569	0.4665	0.8562	0	0.4361	0	0.4632	0.4821	0.4318	0.5594	0.4684	0.4859	0.5627	0.6793	0.9241	0.6869	0.4825	0.7009	5.19203e+06	5.57211e+06	4327873	3844691	4893768	674702	4.41998e+06	0	1.48882e+06	4.97448e+06	3.98554e+06	5976241	4.86184e+06	7.93603e+06	3980403	10625124	15643960	8792233	11345428	8.03927e+06	2.27897e+06	4.6322e+06	2.0417e+06	1.7935e+06
Q9Z2C8_T67	Ybx2	sp|Q9Z2C8|YBOX2_MOUSE	Q9Z2C8	tPGNQATAASGTPAPPAR;tPGNQATAASGtPAPPAR;tPGNQATAAsGTPAPPAR;tPGNQAtAASGTPAPPAR	0.9423	0.9364	0.9423	0.8156	0.9369	0.9367	0.938	0.9394	0.9374	0.9322	0.9368	0.8482	0.866	0.8943	0.4793	0.25	0.9312	0.9391	0.9365	0.9381	0.9296	33989156	47693676	19173428	34042672	19540522	27396400	16700800	15819648	14826148	16877206	0	0	690256	323436	0	46360764	41822152	42349680	38315476	24585454	7.97521e+06	9803094	5.51483e+06	8637331
Q9Z2C8_T73	Ybx2	sp|Q9Z2C8|YBOX2_MOUSE	Q9Z2C8	TPGNQAtAASGTPAPPAR;TPGNQAtAASGtPAPPAR;TPGNQAtAAsGTPAPPAR;tPGNQAtAASGTPAPPAR	0.9428	0.4911	0.9428	0.6075	0.7473	0.9363	0.9194	0.9218	0.933	0.9322	0.9343	0	0	0	0	0	0.8503	0.5865	0.9325	0.6356	0.6464	13407490	17436728	14928416	26078272	9401717	8494550	13945577	7.09099e+06	14235731	12348220	0	0	0	0	0	29042230	19900718	35572172	16584070	19190444	12017431	14484265	8458362	10545755
Q9Z2C8_T78	Ybx2	sp|Q9Z2C8|YBOX2_MOUSE	Q9Z2C8	TPGNQATAASGtPAPPAR;TPGNQATAAsGtPAPPAR;TPGNQAtAASGtPAPPAR;tPGNQATAASGtPAPPAR	0.9408	0.526	0.935	0.8223	0.9373	0.9084	0	0.7951	0.8503	0	0.928	0	0	0	0	0	0.9308	0.9388	0.6573	0.843	0.5853	12209173	15897892	8731396	33969976	5799923	0	10239572	3.49151e+06	0	13610470	0	0	0	0	0	15453588	16429325	18832142	17572470	2317183	3.74278e+06	10174201	4.84235e+06	8493277
Q9Z2E9_S314	Bscl2	sp|Q9Z2E9|BSCL2_MOUSE	Q9Z2E9	HQPGQESTQQSDVTEDGESPEDPsGTEGQLSEEEKPEK	0.8913	0	0	0.2831	0.8742	0.2992	0	0	0	0	0	0	0	0	0	0	0.15	0.379	0	0.2868	0	419965	0	971008	1.70151e+06	380616	0	0	0	0	0	554403	304904	0	0	0	488832	745007	0	825581	0	434221	0	1.00397e+06	1.75927e+06
Q9Z2E9_S321	Bscl2	sp|Q9Z2E9|BSCL2_MOUSE	Q9Z2E9	HQPGQESTQQSDVTEDGESPEDPSGTEGQLsEEEKPEK	0.8569	0	0	0	0.5626	0.6474	0	0	0.6178	0	0	0	0	0	0	0	0	0	0	0	0	0	0	0	1.70151e+06	982301	0	0	584400	0	0	0	0	626913	0	0	302690	750913	0	0	0	0	0	0	1.70151e+06
Q9Z2E9_T304	Bscl2	sp|Q9Z2E9|BSCL2_MOUSE	Q9Z2E9	HQPGQESTQQSDVtEDGESPEDPSGTEGQLSEEEKPEK	0.8369	0	0	0	0	0.6169	0	0	0	0	0	0	0	0	0	0.1801	0	0	0	0.1922	0	0	0	548091	0	539454	0	0	0	0	0	0	0	207183	0	312007	0	0	0	925572	0	0	0	548091	0
Q9Z2U1_S16	Psma5	sp|Q9Z2U1|PSA5_MOUSE	Q9Z2U1	GVNTFsPEGR	0.9214	0.9003	0	0	0	0	0	0	0	0	0	0	0	0	0	0	0	0	0	0	0	191879	0	0	0	0	195901	0	178118	0	0	0	0	0	0	0	0	0	0	0	0	191879	0	0	0
Q9Z2V5_S21	Hdac6	sp|Q9Z2V5|HDAC6_MOUSE	Q9Z2V5	HNPQsPLQESSATLK	0.9307	0	0.8719	0.8363	0.8326	0.9181	0.25	0.25	0.8869	0.6514	0	0	0	0	0	0	0.25	0.2986	0.25	0.25	0.25	0	442229	506896	694314	440682	220809	343918	348368	269764	0	0	0	0	0	0	403916	510419	421882	352718	449255	0	442229	506896	694314
[truncated: 16 more columns]

## Sheet: cluster1
ID	Description	GeneRatio	BgRatio	RichFactor	FoldEnrichment	zScore	pvalue	p.adjust	qvalue	geneID	Count
GO:0006417	regulation of translation	10/85	364/28905	0.0274725274725275	9.34227537168714	8.69845396522465	1.20037457357563e-07	0.00020586423936822	0.000153268879762867	Cpeb1/Caprin2/Larp4b/Eif4g1/Abcf1/Lsm14b/Padi6/Nck1/Eif4enif1/Ybx2	10
GO:0034248	regulation of amide metabolic process	10/85	432/28905	0.0231481481481481	7.87173202614379	7.81507091848974	5.77673353410346e-07	0.000330236600366248	0.000245865886907631	Cpeb1/Caprin2/Larp4b/Eif4g1/Abcf1/Lsm14b/Padi6/Nck1/Eif4enif1/Ybx2	10
GO:0032956	regulation of actin cytoskeleton organization	9/85	359/28905	0.0250696378830084	8.52515156480419	7.79168333663667	1.14215889853011e-06	0.000484478755607564	0.000360701384411217	Pak1/Cfl1/Gja1/Tjp1/Cfl2/Stmn1/Hdac2/Washc2/Nck1	9
GO:0044027	negative regulation of gene expression via CpG island methylation	3/85	12/28905	0.25	85.0147058823529	15.8085145936242	5.29667056085252e-06	0.00113547375148276	0.00084537649872554	Dnmt3a/Dnmt1/Uhrf1	3
GO:1901652	response to peptide	9/85	467/28905	0.019271948608137	6.55359617080237	6.57089702304901	9.65058207981093e-06	0.00150461347880689	0.00112020632180006	Osbpl8/Atp2b1/Srsf5/Pak1/Cfl1/Gja1/Cpeb1/Nucks1/Nck1	9
GO:0048255	mRNA stabilization	4/85	63/28905	0.0634920634920635	21.5910364145658	8.88540532965974	3.63400009576366e-05	0.00415487344282312	0.00309336288853426	Thrap3/Larp4b/Eif4enif1/Ybx2	4

## Sheet: cluster2
ID	Description	GeneRatio	BgRatio	RichFactor	FoldEnrichment	zScore	pvalue	p.adjust	qvalue	geneID	Count
GO:0072594	establishment of protein localization to organelle	14/85	452/28905	0.0309734513274336	10.5327954190526	11.0934570738257	5.91841019796504e-11	9.4635379065461e-08	6.84043620775328e-08	Hsp90aa1/Eps15/Pdcd5/Mapk1/Usp9x/Hspa4/Prkd1/Nup98/Rab3gap2/Sh3kbp1/Pex19/Sec61b/Tomm34/Macf1	14
GO:0007051	spindle organization	9/85	195/28905	0.0461538461538462	15.6950226244344	11.1818179526239	6.3647605917651e-09	2.5443130465581e-06	1.83908082362055e-06	Nudc/Map4/Stmn1/Rps3/Dlgap5/Uhrf1/Khdc3/Tacc3/Tacc2	9
GO:0006417	regulation of translation	10/85	364/28905	0.0274725274725275	9.34227537168714	8.69845396522465	1.20037457357563e-07	3.83879788629486e-05	2.77476059323377e-05	Zar1l/Ncl/Rps3/Mapk1/Igf2bp2/Eif4g2/Eif2b5/Padi6/Igf2bp3/Ybx2	10
GO:0051293	establishment of spindle localization	5/85	57/28905	0.087719298245614	29.8297213622291	11.8320900704718	7.24716913570579e-07	0.000156059019740313	0.000112802609311651	Zw10/Map4/Ooep/Nlrp5/Tle6	5
GO:1903312	negative regulation of mRNA metabolic process	5/85	97/28905	0.0515463917525773	17.5288053365676	8.85548245139298	1.01727801621635e-05	0.000956839734076441	0.000691623072325422	Hnrnpa2b1/Thrap3/Igf2bp2/Igf2bp3/Ybx2	5
GO:0007059	chromosome segregation	8/85	419/28905	0.0190930787589499	6.4927699003229	6.15069414749204	3.31355149167912e-05	0.00245285488221029	0.00177297301646878	Nudc/Zw10/Rps3/Usp9x/Dlgap5/Uhrf1/Khdc3/Tacc3	8

## Sheet: cluster3
ID	Description	GeneRatio	BgRatio	RichFactor	FoldEnrichment	zScore	pvalue	p.adjust	qvalue	geneID	Count
GO:0051656	establishment of organelle localization	12/81	498/28905	0.0240963855421687	8.59883980365908	9.06762672620969	1.44466495425936e-08	9.46292975787067e-06	6.39193888632042e-06	Nudc/Map4/Khdc3/Nsfl1c/Zbed3/Tacc2/Spast/Nlrp5/Pdcd6ip/Tle6/Pdpk1/Hdac6	12
GO:0051293	establishment of spindle localization	5/81	57/28905	0.087719298245614	31.3027940220923	12.1396623101368	5.69487961616106e-07	9.33264954035296e-05	6.30393831886644e-05	Map4/Nsfl1c/Zbed3/Nlrp5/Tle6	5
GO:0006417	regulation of translation	9/81	364/28905	0.0247252747252747	8.82326007326007	7.96247764788575	8.47748675714341e-07	0.000110809639563655	7.48487479278778e-05	Ncl/Rplp1/Mapk1/Igf2bp2/Mapk3/Lsm14b/Padi6/Eif4enif1/Ybx2	9
GO:0007015	actin filament organization	10/81	477/28905	0.0209643605870021	7.48117089836167	7.56630543066843	8.99204316059621e-07	0.000110809639563655	7.48487479278778e-05	Pak1/Rdx/Prkcd/Lcp1/Arhgap12/Khdc3/Zbed3/Nlrp5/Tle6/Hdac6	10
GO:1901653	cellular response to peptide	8/81	346/28905	0.023121387283237	8.25090986940698	7.19288997299432	5.84978820901444e-06	0.000520631150602285	0.000351671478296307	Osbpl8/Pak1/Ncl/Hmga1/Prkcd/Mapk1/Mapk3/Pdpk1	8
GO:1903311	regulation of mRNA metabolic process	7/81	310/28905	0.0225806451612903	8.05794504181601	6.62305601207128	2.69006458756575e-05	0.00172379338771213	0.00116437321937583	Safb/Ncl/Igf2bp2/Carhsp1/Fip1l1/Eif4enif1/Ybx2	7
GO:1902115	regulation of organelle assembly	6/81	231/28905	0.025974025974026	9.26887926887927	6.68887160548257	4.80540702577468e-05	0.00274937930546108	0.0018571272265024	Rdx/Map4/G3bp2/Lcp1/Scfd1/Pdcd6ip	6

## Sheet: cluster4
ID	Description	GeneRatio	BgRatio	RichFactor	FoldEnrichment	zScore	pvalue	p.adjust	qvalue	geneID	Count
GO:0007051	spindle organization	13/158	195/28905	0.0666666666666667	12.1962025316456	11.6300801748957	6.30867131033186e-11	1.54310100250717e-07	1.19731940763456e-07	Map4/Stmn1/Rab11a/Atrx/Cenpe/Bora/Flna/Lsm14a/Dlgap5/Mapre2/Uhrf1/Khdc3/Tacc2	13
GO:0007015	actin filament organization	15/158	477/28905	0.0314465408805031	5.75292572247433	7.75993916751419	6.27635775299022e-08	3.66550909116746e-05	2.84413344725005e-05	Diaph1/Pdlim1/Cfl1/Stmn1/Bcar1/Sorbs1/Flna/Arhgap12/Ssh3/Ooep/Khdc3/Zbed3/Cd2ap/Nlrp5/Tle6	15
GO:0040019	positive regulation of embryonic development	5/158	24/28905	0.208333333333333	38.1131329113924	13.4846096096942	1.78976688432253e-07	5.47221224881612e-05	4.24598643741252e-05	Cfl1/Khdc3/Zbed3/Nlrp5/Tle6	5
GO:0090068	positive regulation of cell cycle process	11/158	275/28905	0.04	7.31772151898734	7.80418228393948	3.70247029148284e-07	7.61298298214393e-05	5.90704837836446e-05	Rrm2/Rab11a/Sin3a/Atrx/Ddx3x/Eif4g1/Cenpe/Npm2/Ooep/Anp32b/Adam17	11
GO:0006413	translational initiation	8/158	126/28905	0.0634920634920635	11.6154309825196	8.85311911046436	4.85332386155242e-07	8.30304284691076e-05	6.44247805352675e-05	Eif5/Slbp/Ddx3x/Eif4g1/Abcf1/Eif4b/Eif3b/Eif3g	8
GO:0006417	regulation of translation	12/158	364/28905	0.032967032967033	6.03108916400056	7.16125876049139	8.42466639790869e-07	0.000103033670046423	7.99456500812072e-05	Zar1l/Gcn1/Ncl/Eif5/Ddx3x/Larp4b/Eif4g1/Abcf1/Eif3b/Lsm14a/Igf2bp3/Eefsec	12
GO:0031507	heterochromatin formation	7/158	114/28905	0.0614035087719298	11.233344437042	8.11620291079896	3.21709209255727e-06	0.00028103597351411	0.000218060791085743	Trip12/Dnmt1/Lmna/Sin3a/Atrx/Trim28/Uhrf1	7

## Sheet: cluster raw data
	Index	Gene	GV_1	GV_2	GV_3	GV_4	GV_5	GVBD_1	GVBD_2	GVBD_3	GVBD_4	GVBD_5	MI_1	MI_2	MI_3	MI_4	MI_5	MII_1	MII_2	MII_3	MII_4	MII_5	cluster
1	A1A5B6_S560	Tbc1d25	-0.394676	-0.394676	-0.394676	-0.394676	-0.394676	-0.394676	-0.394676	-0.394676	-0.394676	-0.394676	-0.394676	-0.394676	-0.394676	-0.394676	-0.394676	1.86818734961012	-0.394676	1.66476927582921	3.17653073111691	-0.394676	4
2	A2A432_S192	Cul4b	-1.07037	-1.07037	-1.07037	-1.07037	-1.07037	-1.07037	-1.07037	-1.07037	0.493200246108742	0.757952216209703	0.90885426805252	0.931614731017752	0.987082586751494	0.967154216140589	0.906317939458349	0.957958839475316	0.790764704197683	1.0998058606734	-1.07037	0.832663974471172	2
3	A2ADY9_S127	Ddi2	-0.772172	-0.772172	-0.772172	-0.772172	-0.772172	0.791560477510698	1.20659949837891	1.10194245182079	0.931951761224266	-0.772172	-0.772172	-0.772172	-0.772172	1.14385525827959	-0.772172	1.89986479803927	0.669028869306904	1.52126477160071	-0.772172	-0.772172	3
4	A2ADY9_S128	Ddi2	-0.407554	-0.407554	-0.407554	-0.407554	-0.407554	-0.407554	-0.407554	-0.407554	-0.407554	-0.407554	-0.407554	-0.407554	-0.407554	-0.407554	-0.407554	2.37956178112292	-0.407554	1.98465629962549	2.56419981943076	-0.407554	4
5	A2AN08_S178	Ubr4	-1.11124	-1.11124	-1.11124	-1.11124	-1.11124	-1.11124	-0.19867	-1.11124	0.421564291575362	-1.11124	0.529111492703279	0.749096438909836	0.497531435066849	0.345419029668263	0.538949666139458	1.30380063688058	0.988915242668387	1.5311256924742	1.10401313985888	1.07909446723729	2
6	A2AN08_S181	Ubr4	-0.559058	-0.559058	-0.559058	-0.559058	-0.559058	-0.559058	-0.559058	-0.559058	-0.559058	-0.559058	-0.559058	-0.559058	-0.559058	-0.559058	-0.559058	1.90301955850666	1.44663686738282	1.96759241814485	1.43964357787168	1.62897966174934	4
7	A2AN08_S619	Ubr4	1.13284226978923	0.666768487054288	1.65042051241697	-0.134129	0.236411706237422	-0.00535842	0.73090327744396	0.916989236555121	0.45352568937776	0.0366529015079856	-0.300997	-0.0236833	0.498142531884268	0.267476585990382	0.552833661659515	-0.725789	-0.58009	-0.982768	-1.59931	-2.79084	1
8	A2AN08_T2712	Ubr4	1.66314664624378	1.0942012583888	0.530754206358714	0.871818032899182	0.966510049923044	0.0458839983037786	0.705645759304037	0.385798713933519	-2.51897	0.150718383229136	0.148807036268332	0.22985987586335	0.136761101778727	0.245897203881456	0.533474999894037	-0.746219	-0.882915	-1.13425	-1.35007	-1.07685	1
9	A2TJV2_S451	Palm3	-0.429908	2.4693965106536	-0.429908	2.31449281814567	2.1414661445194	-0.429908	-0.046828	-0.429908	-0.429908	-0.429908	-0.429908	-0.429908	-0.429908	-0.429908	-0.429908	-0.429908	-0.429908	-0.429908	-0.429908	-0.429908	1
10	B1AZA5_T331	Tmem245	-0.409093	-0.409093	-0.409093	-0.409093	-0.409093	-0.409093	-0.409093	-0.409093	-0.409093	-0.409093	2.22430102485225	2.26598868273364	2.46428750970535	-0.409093	-0.409093	-0.409093	-0.409093	-0.409093	-0.409093	-0.409093	1
11	B1AZP2_S909	Dlgap4	-0.552785	-0.552785	-0.552785	-0.552785	-0.552785	-0.552785	-0.552785	-0.552785	-0.552785	-0.552785	-0.552785	-0.552785	-0.552785	-0.552785	-0.552785	1.79432867256456	1.82380670127727	1.91786890282226	1.82241314181273	0.933350087256634	4
12	B1AZP2_S973	Dlgap4	-0.113514	-0.275793	-0.447004	-0.872749	-1.71432	-0.277187	0.738027692500967	0.352495960742715	-1.65947	-0.597761	-0.766844	0.236234815578472	-0.0948456	-0.253559	-0.140928	1.82221413356084	1.2292509672926	1.02917903760509	2.10622307098627	-0.299642	4
13	B1AZP2_T915	Dlgap4	-0.562219	-0.562219	-0.562219	-0.562219	-0.562219	-0.562219	-0.562219	-0.562219	-0.562219	-0.562219	-0.562219	-0.562219	-0.562219	-0.562219	-0.562219	1.73085286462693	1.72415882620877	1.69464392993543	1.7582907023879	1.52534090939272	4
14	B1B0V2_S20	Ezhip	-0.612345	-0.612345	-0.612345	-0.612345	-0.612345	-0.612345	-0.612345	-0.612345	-0.612345	-0.612345	-0.612345	0.363240229788941	-0.612345	-0.612345	-0.612345	1.58183575139501	1.37779231342013	1.84350163505492	1.60963956175129	1.79682241972953	4
15	B1B0V2_S201	Ezhip	-0.405692	-0.405692	-0.405692	-0.405692	-0.405692	-0.405692	-0.405692	-0.405692	-0.405692	-0.405692	-0.405692	-0.405692	-0.405692	-0.405692	-0.405692	-0.405692	1.83086880225781	2.62869341777459	2.43719753205709	-0.405692	4
16	B1B0V2_S235	Ezhip	-0.485736	-0.485736	-0.485736	-0.485736	-0.485736	-0.485736	-0.485736	-0.485736	-0.485736	-0.485736	-0.485736	-0.485736	-0.485736	-0.485736	-0.485736	1.93315397687773	-0.485736	2.21784695110692	1.72668855744284	1.89409116132642	4
17	B1B0V2_S254	Ezhip	-0.561449	-0.561449	-0.561449	-0.561449	-0.561449	-0.561449	-0.561449	-0.561449	-0.561449	-0.561449	-0.561449	-0.561449	-0.561449	-0.561449	-0.561449	1.65444584591345	1.69721921907812	1.82128652903182	1.79687207442267	1.45191152624066	4
18	B1B0V2_S306	Ezhip	-0.394504	-0.394504	-0.394504	-0.394504	-0.394504	-0.394504	-0.394504	-0.394504	-0.394504	-0.394504	-0.394504	-0.394504	-0.394504	-0.394504	-0.394504	-0.394504	-0.394504	2.10807644437913	3.11692613773295	1.48156039856163	4
19	B1B0V2_S326	Ezhip	-0.562054	-0.562054	-0.562054	-0.562054	-0.562054	-0.562054	-0.562054	-0.562054	-0.562054	-0.562054	-0.562054	-0.562054	-0.562054	-0.562054	-0.562054	1.67665296676186	1.53742234293973	1.83692201089441	1.70955565515915	1.67025150204652	4
20	B1B0V2_S327	Ezhip	-0.562622	-0.562622	-0.562622	-0.562622	-0.562622	-0.562622	-0.562622	-0.562622	-0.562622	-0.562622	-0.562622	-0.562622	-0.562622	-0.562622	-0.562622	1.72032603031111	1.62772448716787	1.72515148501714	1.70857929551583	1.65754421252293	4
21	B1B0V2_S332	Ezhip	-0.484982	-0.484982	-0.484982	-0.484982	-0.484982	-0.484982	-0.484982	-0.484982	-0.484982	-0.484982	-0.484982	-0.484982	-0.484982	-0.484982	-0.484982	2.0653180746577	1.72228963846046	2.22695966957685	-0.484982	1.74514011112765	4
22	B1B0V2_S367	Ezhip	-0.407632	-0.407632	-0.407632	-0.407632	-0.407632	-0.407632	-0.407632	-0.407632	-0.407632	-0.407632	-0.407632	-0.407632	-0.407632	-0.407632	-0.407632	2.36984014094355	-0.407632	2.56515049682776	1.99476049110423	-0.407632	4
23	B1B0V2_S385	Ezhip	-0.562476	-0.562476	-0.562476	-0.562476	-0.562476	-0.562476	-0.562476	-0.562476	-0.562476	-0.562476	-0.562476	-0.562476	-0.562476	-0.562476	-0.562476	1.68837674261428	1.69610255493259	1.58382893357533	1.76628242553982	1.7025469979785	4
24	B1B0V2_S438	Ezhip	-0.553716	-0.553716	-0.553716	-0.553716	-0.553716	-0.553716	-0.553716	-0.553716	-0.553716	-0.553716	-0.553716	-0.553716	-0.553716	-0.553716	-0.553716	1.73488088918036	1.99806733367981	1.86980281541274	1.70479197281721	0.998202992076285	4
25	B1B0V2_S479	Ezhip	-0.561415	-0.561415	-0.561415	-0.561415	-0.561415	-0.561415	-0.561415	-0.561415	-0.561415	-0.561415	-0.561415	-0.561415	-0.561415	-0.561415	-0.561415	1.5989097155968	1.67865460856303	1.85681377316812	1.79895684650789	1.48788626221296	4
26	B1B0V2_S490	Ezhip	-0.561529	-0.561529	-0.561529	-0.561529	-0.561529	-0.561529	-0.561529	-0.561529	-0.561529	-0.561529	-0.561529	-0.561529	-0.561529	-0.561529	-0.561529	1.81662879330141	1.54377307583616	1.63832174332562	1.85388979490151	1.57031850598755	4
27	B1B0V2_S491	Ezhip	-0.560608	-0.560608	-0.560608	-0.560608	-0.560608	-0.560608	-0.560608	-0.560608	-0.560608	-0.560608	-0.560608	-0.560608	-0.560608	-0.560608	-0.560608	1.73926484764484	1.47539110908787	1.91809533144273	1.77529927597178	1.50106270563978	4
28	B1B0V2_T104	Ezhip	-0.656638	-0.656638	-0.656638	-0.656638	-0.656638	-0.656638	-0.656638	-0.656638	-0.656638	-0.656638	-0.656638	0.114100794115677	0.365733319247488	-0.656638	-0.656638	1.52401087063661	1.30238080989212	1.90551228373652	1.47270506581809	1.85184514620294	4
29	B1B0V2_T17	Ezhip	-0.556862	-0.556862	-0.556862	-0.556862	-0.556862	-0.556862	-0.556862	-0.556862	-0.556862	-0.556862	-0.556862	-0.556862	-0.556862	-0.556862	-0.556862	1.72884401659623	1.64320384324236	2.15452282009112	1.30494948616438	1.5214099695314	4
30	B2RRE7_S1016	Otud4	1.92145276128123	1.26850026736329	-0.775774	1.24500594507682	1.30625977228312	-0.775774	-0.775774	-0.775774	-0.775774	-0.775774	1.02716919669851	0.891012661398532	-0.775774	0.752013917426633	0.897869456181388	-0.775774	-0.775774	-0.775774	-0.775774	-0.775774	1
31	B2RRE7_S1017	Otud4	1.92145276128123	1.26850026736329	-0.775774	1.24500594507682	1.30625977228312	-0.775774	-0.775774	-0.775774	-0.775774	-0.775774	1.02716919669851	0.891012661398532	-0.775774	0.752013917426633	0.897869456181388	-0.775774	-0.775774	-0.775774	-0.775774	-0.775774	1
32	B2RUJ5_S317	Apba1	-0.562437	-0.562437	-0.562437	-0.562437	-0.562437	1.77586748064545	-0.562437	1.7323739019276	1.65833509042201	1.67776623595012	-0.562437	-0.562437	-0.562437	-0.562437	1.59221922399624	-0.562437	-0.562437	-0.562437	-0.562437	-0.562437	1
33	B2RUJ5_T309	Apba1	-0.682006	-0.682006	-0.682006	-0.682006	-0.682006	-0.682006	1.37218637665161	-0.682006	1.55241205580131	-0.682006	1.50518477087569	1.4776690280623	1.51068617145839	1.38762856333732	-0.682006	-0.682006	0.0603062205370779	-0.682006	-0.682006	-0.682006	1
34	B9EJ86_S26	Osbpl8	0.126534327459791	-0.140921	0.155822620624121	-0.0569129	0.104633454406327	0.414846664465885	0.676350037295752	0.570071914010859	0.747133789754356	0.419242570731332	-2.2481	-2.2481	0.472310788944376	0.709823762589472	0.540801238467288	0.627562509873182	-2.2481	0.568603833826638	0.48145757819982	0.326952137338611	1
35	B9EJ86_S32	Osbpl8	-0.712893	-0.712893	-0.712893	-0.712893	-0.712893	-0.712893	1.44165724029762	-0.712893	-0.712893	-0.712893	1.44298409083319	1.05082090061062	1.29133419971965	1.28672472110093	-0.712893	-0.712893	1.29751162562245	-0.712893	1.4565826600761	-0.712893	3
36	B9EJ86_T39	Osbpl8	-0.970328	-0.970328	-0.970328	-0.970328	-0.970328	-0.970328	-0.970328	1.0408160888407	1.1671733026933	0.933179278239931	1.1179449172731	0.738079313398104	-0.970328	-0.970328	-0.970328	1.02440669598334	0.797015529599373	1.03976841823961	0.977577966385116	0.86731777090084	2
37	C3VD30_S183	Zar1l	-0.635364	-0.635364	-0.635364	-0.635364	-0.635364	-0.635364	-0.635364	-0.635364	-0.635364	-0.635364	-0.635364	1.46740208529906	1.36027553697542	1.39667989601677	1.28681027475962	-0.635364	-0.635364	1.61232489153119	-0.635364	1.77160176375673	2
38	C3VD30_Y180	Zar1l	-0.483891	-0.483891	-0.483891	-0.483891	-0.483891	-0.483891	-0.483891	-0.483891	-0.483891	-0.483891	-0.483891	-0.483891	-0.483891	-0.483891	-0.483891	2.08723245787758	1.48795644535002	2.06292414134453	-0.483891	2.10413613472126	4
39	D3YXK2_S366	Safb	-0.878487	-0.878487	-0.878487	-0.878487	-0.878487	1.19968943389164	1.30596205684239	-0.878487	1.14210163627492	-0.878487	-0.878487	0.993073451419631	-0.878487	0.965057211703576	1.05382	-0.878487	1.11968337843609	0.890720796808754	0.993249245845808	-0.878487	3
40	D3YZP9_S233	Ccdc6	-1.68082	-1.68082	-1.68082	-1.68082	-1.68082	0.621472706580796	0.689389023181522	0.609867042367523	0.673695585616097	0.547663217296286	0.616650232427697	0.308760048929221	0.650585104350168	0.503970112731586	0.521201288717958	0.575434404841223	0.551767833586305	0.618868439470536	0.344590980226667	0.57020291949585	3
41	D3YZP9_S237	Ccdc6	-1.88194	-0.162533	-0.0236315	-0.0144632	0.434855250867208	0.690819999722952	0.766714875647839	0.677850944721479	-1.88194	-1.88194	-1.88194	0.341371008074393	0.72335241501237	0.559513632897062	0.578769064124491	0.63937328745705	0.612926454370989	0.687909792881636	0.381411225524344	0.633527226435748	2
42	D3Z6Q9_S380	Bin2	-0.855549	-0.855549	-0.855549	-0.855549	-0.855549	0.453229767136643	0.861386154516962	-0.855549	-0.855549	-0.855549	1.04866745167705	-0.855549	1.59922117266656	0.833368487670323	0.751983833794929	1.03064436525165	-0.855549	1.34583602331583	-0.855549	1.48670444968441	2
43	D3Z6Q9_T378	Bin2	-1.25176	-1.25176	-1.25176	-1.25176	-1.25176	0.103785720091523	-1.25176	0.336337658924702	0.186870797785503	-1.25176	0.643055231329921	0.461321488083514	0.607415584038171	0.548401959876973	0.347835925022088	1.36235546233455	0.941174926311336	1.24272048113233	0.668588313303409	1.31247755653322	2
44	E9PVA8_T1283	Gcn1	-0.557583	-0.557583	-0.557583	-0.557583	-0.557583	-0.557583	-0.557583	-0.557583	-0.557583	-0.557583	-0.557583	-0.557583	-0.557583	-0.557583	-0.557583	1.56604211767863	1.53877298174519	1.90858516358525	2.03647905280665	1.31387115392701	4
45	E9PYK3_S96	Parp4	-0.472077	-0.472077	-0.472077	-0.472077	-0.472077	-0.472077	-0.472077	-0.472077	-0.472077	-0.472077	-0.472077	-0.472077	-0.472077	-0.472077	-0.472077	1.36278019935678	2.49417015159283	1.33577816885692	2.3604961165585	-0.472077	4
46	G5E829_S1155	Atp2b1	1.1974179697271	0.926686775715508	1.17624665641516	1.16496786176997	-1.33753	0.526342506683417	0.83722868676447	0.636532970617044	0.376108780978218	0.665052796470706	0.456554258440383	-0.829125	0.0389887283758027	0.477574205297352	0.374628111439837	-1.33753	-1.33753	-1.33753	-1.33753	-1.33753	1
47	G5E870_S1020	Trip12	-0.557316	-0.557316	-0.557316	-0.557316	-0.557316	-0.557316	-0.557316	-0.557316	-0.557316	-0.557316	-0.557316	-0.557316	-0.557316	-0.557316	-0.557316	1.78026300542063	1.17410172343475	1.61246001869798	1.90027894872882	1.89263065945533	4
48	O08638_T1951	Myh11	-0.635177	-0.635177	-0.635177	-0.635177	-0.635177	-0.635177	1.43581702807335	-0.635177	-0.635177	-0.635177	-0.635177	-0.635177	1.43798046147555	-0.635177	-0.635177	1.16465538458169	1.64519120819597	1.6784748112337	-0.635177	1.53035707293157	4
49	O08715_S176	Akap1	-0.561496	-0.561496	-0.561496	-0.561496	-0.561496	-0.561496	-0.561496	-0.561496	-0.561496	-0.561496	-0.561496	-0.561496	-0.561496	-0.561496	-0.561496	1.4571883633077	1.84361082564281	1.66862688180278	1.69092598776305	1.76209537543607	4
50	O08715_T373	Akap1	0.567911276469604	-1.8815	-1.8815	-1.8815	0.433738022762593	0.0811438192903352	-1.8815	0.799843908201453	0.694245241074044	0.642270772372268	0.517664252339435	0.752350388573463	0.716038806434599	0.772733770957531	0.833837192456124	0.0362282473161532	0.314903034833698	0.146233030725013	0.0645955236546469	0.15226723350869	3
51	O08808_S22	Diaph1	-0.486688	-0.486688	-0.486688	-0.486688	-0.486688	-0.486688	-0.486688	-0.486688	-0.486688	-0.486688	-0.486688	-0.486688	-0.486688	-0.486688	-0.486688	1.78655839669192	1.9751690880906	1.92428237854909	-0.486688	2.10100141690912	4
52	O08808_T29	Diaph1	-0.407948	-0.407948	-0.407948	-0.407948	-0.407948	-0.407948	-0.407948	-0.407948	-0.407948	-0.407948	-0.407948	-0.407948	-0.407948	-0.407948	-0.407948	2.06887872753415	2.27438044743623	-0.407948	2.59186447345953	-0.407948	4
53	O35280_S301	Chek1	-0.404428	-0.404428	-0.404428	-0.404428	-0.404428	-0.404428	-0.404428	-0.404428	-0.404428	-0.404428	-0.404428	-0.404428	-0.404428	-0.404428	-0.404428	-0.404428	2.65461266798892	2.47465886346086	1.74600664627892	-0.404428	4
54	O35326_S165	Srsf5	1.02150094927092	0.629313173992242	0.631234727127505	0.933334935646194	1.1828264074069	0.902846332517867	1.21188001886564	1.00585157946892	1.13131381704949	1.00102038168425	-0.965112	-0.965112	-0.965112	-0.965112	-0.965112	-0.965112	-0.965112	-0.965112	-0.965112	-0.965112	1
55	O35685_S136	Nudc	-0.376081	-2.18473	-2.18473	-0.313552	-2.18473	0.103283184890488	0.326491869368999	0.11552990052904	0.123530774810096	0.135935765328084	0.544043321360303	0.61512676426379	0.636466359031517	0.434284389760398	0.570247055587602	0.767213635550936	0.862608878308818	0.615105263375748	0.67673195488161	0.717238250599878	3
56	O35685_S139	Nudc	-1.34424	-0.0650925	-1.34424	-1.34424	-1.34424	-1.34424	-0.0671742	0.530670238510179	0.124879963758829	-0.237853	-0.0971128	0.937884713387371	0.955278321130365	-1.34424	0.901303885268086	1.03519962859708	1.10174345493662	0.936521225062546	0.988098249876792	1.02111436974758	2
57	O35685_T99	Nudc	-1.43783	-1.43783	-1.43783	-1.43783	-1.43783	-0.0732438	0.732079544587139	0.62938337152955	0.563684990864275	0.660617899962495	0.845305890224782	0.483575643245175	0.843330566364613	0.738746963860262	-1.43783	0.318369938173855	1.24682299310835	0.24059672709759	0.763593188547702	0.634104385512261	3
58	O54692_S438	Zw10	-0.780074	-0.780074	-0.780074	-0.780074	-0.780074	-0.780074	-0.780074	-0.780074	-0.780074	-0.780074	-0.780074	0.81534089452562	1.21803338165893	1.30596972863437	-0.780074	0.625705061047668	1.34604976808821	1.6763674735192	1.10375133824666	1.26966476722707	2
59	O55022_T190	Pgrmc1	-0.637382	-0.637382	-0.637382	-0.637382	-0.637382	1.38117783781962	-0.637382	1.49565619709463	1.55644925333204	-0.637382	1.36763047390515	-0.637382	-0.637382	1.55646392861746	1.56596771401123	-0.637382	-0.637382	-0.637382	-0.637382	-0.637382	1
60	O55029_S845	Copb2	-0.561919	-0.561919	-0.561919	-0.561919	-0.561919	-0.561919	1.51041860870152	-0.561919	-0.561919	1.67457252208113	1.71438218627542	1.69161098891271	-0.561919	1.83779707838757	-0.561919	-0.561919	-0.561919	-0.561919	-0.561919	-0.561919	1
61	O55029_T868	Copb2	-0.402362	-0.402362	-0.402362	-0.402362	-0.402362	-0.402362	-0.402362	-0.402362	-0.402362	-0.402362	-0.402362	1.82929838744489	-0.402362	2.92203149695955	2.08882	-0.402362	-0.402362	-0.402362	-0.402362	-0.402362	1
62	O55106_S239	Strn	-0.47669	-0.47669	-0.47669	-0.47669	-0.47669	-0.47669	-0.47669	-0.47669	-0.47669	-0.47669	-0.47669	-0.47669	-0.47669	-0.47669	-0.47669	-0.47669	1.74293639800053	1.50896829198529	2.67673295236533	1.69839864331179	4
63	O55106_S259	Strn	-0.4078	-0.4078	-0.4078	-0.4078	-0.4078	-0.4078	-0.4078	-0.4078	-0.4078	-0.4078	-0.4078	-0.4078	-0.4078	-0.4078	-0.4078	-0.4078	-0.4078	2.27865891598747	2.60178706499039	2.05214735532112	4
64	O55143_S661	Atp2a2	-0.790678	-0.790678	-0.790678	-0.790678	-0.790678	-0.790678	-0.790678	-0.790678	-0.790678	-0.790678	-0.790678	1.24814586314897	-0.790678	1.0573472876543	1.30334309455618	1.09349872021496	1.11447434276884	1.43173492529386	0.866977585680276	1.37261597610916	2
65	O70251_S106	Eef1b	-0.962212	-0.962212	-0.962212	-0.962212	-0.962212	0.98869293068165	0.904147289133031	1.06902892223457	-0.962212	-0.962212	0.925448704850801	-0.962212	0.364855411681648	-0.962212	-0.962212	1.0701571038298	1.18902454293467	1.14425617258113	0.905308059680327	1.06120562989648	4
66	O70318_S492	Epb41l2	-0.486545	-0.486545	-0.486545	-0.486545	-0.486545	-0.486545	-0.486545	-0.486545	-0.486545	-0.486545	-0.486545	-0.486545	-0.486545	-0.486545	-0.486545	2.15836437224685	-0.486545	1.9069407558368	1.84500811488349	1.87439997228998	4
67	O70400_S90	Pdlim1	-0.408112	-0.408112	-0.408112	-0.408112	-0.408112	-0.408112	-0.408112	-0.408112	-0.408112	-0.408112	-0.408112	-0.408112	-0.408112	-0.408112	-0.408112	2.50777609251457	-0.408112	2.39754228260701	2.03258641834271	-0.408112	4
68	O70435_S250	Psma3	-0.405746	-0.405746	-0.405746	-0.405746	-0.405746	-0.405746	-0.405746	-0.405746	-0.405746	-0.405746	-0.405746	-0.405746	-0.405746	-0.405746	-0.405746	-0.405746	-0.405746	2.69173621856707	1.8675225178915	2.33842062787517	4
69	O88487_T154	Dync1i2	-1.31204	-1.31204	-1.31204	-1.31204	-1.31204	0.232578001065849	0.565977151450149	-1.31204	0.661760634891672	-1.31204	0.84405818984618	0.716919199116888	0.824216077038554	0.503158787144648	0.647434852621615	0.799004178744845	0.82280625346124	0.678528871668091	0.916018433338791	0.971838068550626	2
70	O88508_T257	Dnmt3a	-0.409249	-0.409249	-0.409249	-0.409249	-0.409249	2.21382610584424	-0.409249	2.34204678454361	-0.409249	2.4013636334079	-0.409249	-0.409249	-0.409249	-0.409249	-0.409249	-0.409249	-0.409249	-0.409249	-0.409249	-0.409249	1
71	O88559_S544	Men1	-1.0219	-1.0219	-1.0219	-1.0219	-1.0219	-1.0219	0.378877993157758	-1.0219	-1.0219	0.34511728084315	0.746317128782154	0.459405505087575	-1.0219	0.581000186804996	0.504095646533992	1.56060213115638	1.20726899311191	0.773567645044263	1.3048986108791	1.33599311340733	2
72	O88569_Y244	Hnrnpa2b1	-0.708857	-0.708857	-0.708857	-0.708857	-0.708857	-0.708857	-0.708857	-0.708857	-0.708857	-0.708857	-0.708857	1.12292944313165	-0.708857	1.17625068384503	1.06782640693303	1.75680430598797	-0.708857	1.29987903452581	1.46928035462609	1.32217721431223	2
73	O88643_S204	Pak1	-0.698677	-0.698677	-0.698677	-0.698677	-0.698677	-0.698677	1.55291780088378	1.59857222438228	1.60533774417773	-0.698677	-0.698677	1.2501613048471	-0.698677	1.52210939316425	-0.698677	0.669086863713741	-0.698677	-0.698677	0.884621136648157	-0.698677	1
74	O88643_T212	Pak1	-0.858666	-0.858666	-0.858666	-0.858666	-0.858666	1.07920283054486	-0.858666	1.27309913813392	-0.858666	1.39132049106534	1.17536271068464	-0.858666	1.35307510350857	1.20214436400229	0.993729752608865	-0.858666	-0.858666	0.640005259303599	-0.858666	0.337390914873683	3
75	P07901_S231	Hsp90aa1	-1.06162	-1.44449	-0.755611	-0.395727	0.267309681852406	-0.311275	-1.46115	0.979136570008389	0.520847805587564	-1.12588	-0.132445	-0.953435	-0.225641	1.38372255177591	0.028060086587533	-0.370323	1.38082936735211	0.600240467957931	1.8745360016458	1.20291101858919	2
76	P07901_S252	Hsp90aa1	-0.36237	-0.165836	0.450741731961473	-0.61403	0.182030449506199	-0.596256	0.595588628848017	-1.58323	-2.59009	-0.992726	0.73322382475722	0.461282589020016	-0.337857	-0.132895	0.233837924320319	0.828203974729809	0.87343430195071	0.974572879162935	0.0476013991789825	1.99477729703367	2
77	P07901_S263	Hsp90aa1	-1.505	-1.55747	-0.626975	1.05442032756116	0.852405527561909	-0.245655	-0.0971288	-0.925226	-0.62261	-0.376585	-0.210013	0.244031934228707	-1.81529	-0.0140654	0.337544622448172	1.13601346486193	1.2115554542979	0.308186429588435	1.1181	1.73375433342746	4
78	P07901_T705	Hsp90aa1	-0.629296	-0.629296	-0.629296	-0.629296	-0.629296	-0.629296	-0.629296	-0.629296	-0.629296	-0.629296	-0.629296	1.91002292672691	-0.629296	-0.629296	-0.629296	1.35372460470654	1.1662632913328	1.61872645849783	1.68230339907641	1.07910320907943	4
79	P08003_Y313	Pdia4	-0.556994	-0.556994	-0.556994	2.1328747391906	-0.556994	1.28752435324021	1.5219045700096	1.6934370693947	1.71917498949047	-0.556994	-0.556994	-0.556994	-0.556994	-0.556994	-0.556994	-0.556994	-0.556994	-0.556994	-0.556994	-0.556994	1
80	P08003_Y316	Pdia4	-0.556994	-0.556994	-0.556994	2.1328747391906	-0.556994	1.28752435324021	1.5219045700096	1.6934370693947	1.71917498949047	-0.556994	-0.556994	-0.556994	-0.556994	-0.556994	-0.556994	-0.556994	-0.556994	-0.556994	-0.556994	-0.556994	1
81	P09405_S145	Ncl	-0.6221	-0.6221	-0.6221	-0.6221	-0.6221	-0.6221	0.795819149264017	-0.6221	-0.6221	-0.6221	-0.6221	-0.6221	-0.6221	-0.6221	-0.6221	1.62941870505719	1.56138556051768	1.11580212597332	2.03310547041192	1.57387539247777	4
82	P09405_S157	Ncl	-0.6221	-0.6221	-0.6221	-0.6221	-0.6221	-0.6221	0.795819149264017	-0.6221	-0.6221	-0.6221	-0.6221	-0.6221	-0.6221	-0.6221	-0.6221	1.62941870505719	1.56138556051768	1.11580212597332	2.03310547041192	1.57387539247777	4
83	P09405_S28	Ncl	-0.529265	-0.529265	-0.529265	-0.529265	-0.529265	-0.529265	-0.529265	-0.529265	-0.529265	-0.529265	-0.529265	-0.529265	-0.529265	-0.529265	-0.529265	1.37770210309236	1.1237425472159	0.911460122313019	1.73206699560381	2.79401049996414	4
84	P09405_S34	Ncl	-0.529265	-0.529265	-0.529265	-0.529265	-0.529265	-0.529265	-0.529265	-0.529265	-0.529265	-0.529265	-0.529265	-0.529265	-0.529265	-0.529265	-0.529265	1.37770210309236	1.1237425472159	0.911460122313019	1.73206699560381	2.79401049996414	4
85	P09405_S403	Ncl	-0.87111	-0.87111	-0.87111	-0.87111	-0.87111	-0.87111	-0.87111	-0.87111	0.940312961271255	-0.87111	-0.87111	0.853778725849607	1.23510664495007	0.681471220468809	0.922957606656354	1.02017300144161	1.3795275241418	1.32801376352737	1.22086438273415	-0.87111	2
86	P09405_T121	Ncl	-1.61578	-1.61578	-1.61578	-1.61578	-1.61578	0.462224168016755	0.931384423917347	0.935213470080511	0.599614374088483	0.870683571488207	0.769505226755647	0.50596341083567	0.847224049311325	0.440211906664798	0.729218313647505	0.0710926129046951	0.393022109437822	0.605361809837283	-0.202208	0.120405735025938	3
87	P10711_S81	Tcea1	-0.485622	-0.485622	-0.485622	-0.485622	-0.485622	-0.485622	-0.485622	-0.485622	-0.485622	-0.485622	-0.485622	-0.485622	-0.485622	-0.485622	-0.485622	1.6465481216322	2.12657875628069	-0.485622	1.94359763854939	2.0532210961107	4
88	P11157_S20	Rrm2	-0.402486	-0.402486	-0.402486	-0.402486	-0.402486	-0.402486	-0.402486	-0.402486	-0.402486	-0.402486	-0.402486	-0.402486	-0.402486	-0.402486	-0.402486	2.61003122321575	1.6272800624486	2.6049529961361	-0.402486	-0.402486	4
89	P11157_T33	Rrm2	-0.627627	-0.627627	-0.627627	-0.627627	-0.627627	-0.627627	-0.627627	-0.627627	-0.627627	-0.627627	-0.627627	-0.627627	1.37583374956715	-0.627627	-0.627627	1.20709263266783	0.952764143653591	1.76278635780648	1.87812913151892	1.61017011731511	4
90	P11499_S226	Hsp90ab1	0.429733976602826	0.407988910686747	-2.78955	0.365311885414058	0.651075805321611	-0.218176	0.244005841839819	0.357720782746928	0.377390976798116	-0.027914	-0.0862486	-0.0703932	-0.110901	0.0912099485076624	-2.78955	0.660489109764723	0.397485097566786	0.543753223676919	0.790863464520046	0.775694750840636	4
91	P11499_S255	Hsp90ab1	0.180688334229095	0.4671350231956	0.041026863198267	0.211235997369055	0.874307024854721	-1.08165	-0.131884	-0.377463	-0.267872	-0.464243	-0.385881	-0.656158	-0.706292	-0.471408	-2.76164	1.41982798839208	1.51672935694941	0.119418528691016	1.1989887924938	1.27512562014576	4
92	P11881_Y2113	Itpr1	-0.408603	-0.408603	-0.408603	-0.408603	-0.408603	-0.408603	-0.408603	-0.408603	-0.408603	-0.408603	2.46641054862063	2.09154255008949	-0.408603	-0.408603	2.38830557122504	-0.408603	-0.408603	-0.408603	-0.408603	-0.408603	1
93	P13864_S1128	Dnmt1	-1.17317	-1.17317	-1.17317	-1.17317	-1.17317	0.581477313424786	0.485022034671315	1.40418064466249	1.05885861348531	1.10343940483232	-0.342508	0.767204648160809	-1.17317	0.743427392906997	0.941701864298511	0.157233438513782	-0.567756	1.27338259731805	0.606529089923255	-1.17317	3
94	P13864_S140	Dnmt1	-3.11805	-1.03988	-0.977629	-1.19319	-1.18399	0.221879189223927	0.403616811030491	0.273521233617759	0.389763270058226	0.502007188006463	0.564593907282839	0.349588443180271	0.597205602436095	0.535774706108217	0.199010977417575	0.546492263970983	0.474479107094109	0.649772743775764	1.01420383308794	0.79081954034424	3
95	P13864_S142	Dnmt1	-1.66795	-1.66795	-1.66795	-1.66795	-1.66795	0.401792857831873	0.633512450113661	0.423091217476791	0.473523534983792	0.515401598240719	0.423230073894713	0.40718702704083	0.705092429532915	0.439028872279532	0.266575328349505	0.655313662048749	0.562880291995179	0.664502552987621	0.898839769890156	0.869762321846983	3
96	P13864_S146	Dnmt1	0.653115398291779	-1.87936	0.529812103359468	0.684300057361642	0.720876710574795	-0.40925	-1.87936	0.575797750876377	-1.87936	-1.87936	0.460732088935785	0.452101012566358	0.531685623952584	0.154416526765262	0.358381681329719	0.354252883031518	0.694756417576246	0.693597518675474	0.824682643313163	0.238198747448946	2
97	P13864_S150	Dnmt1	0.345309339251136	-0.0693173	-0.0555631	-0.506031	-0.0193464	0.829135298468611	-2.16887	0.724247259556943	-2.16887	0.7085365851363	0.249207556606238	0.210179035656016	-2.16887	0.246684302205758	0.847252672869887	0.673395153892361	0.605682108862178	0.525756568324068	0.818108682393487	0.373373872416018	2
98	P13864_S152	Dnmt1	0.888061030152645	0.740946089665565	0.780623515678229	0.829624715056779	0.93460217289469	-1.31856	0.72040131467738	-1.31856	0.716477644529887	0.720467834968552	0.455382238790693	-1.31856	0.782255965126976	-1.31856	-1.31856	-1.31856	0.424898979336787	-1.31856	0.671858142575136	0.564302352379557	1
99	P13864_S187	Dnmt1	-1.03926	-1.03926	-1.03926	-1.03926	-1.03926	0.808647027107997	-1.03926	-1.03926	1.18479870000816	0.842205420855022	0.979297140069832	0.820658966954708	-0.190271	-1.03926	-1.03926	0.923475062309201	1.05494082669309	0.924584608514711	1.0840586126732	0.920915911233859	2
100	P13864_S285	Dnmt1	-1.06876	-1.06876	-1.06876	-1.06876	-1.06876	-0.53339	-0.149715	-0.0487251	-0.21864	-0.14804	-0.0192993	-0.119818	0.0413761873474074	-0.121847	-0.955878	1.85262039664391	1.11790037636853	1.78118675234899	1.39356579958864	1.47249020271246	4
101	P13864_S331	Dnmt1	-1.58174	-1.58174	-1.58174	-1.58174	-1.58174	-0.217952	0.171560845218833	0.0293599608667766	0.347705394238594	0.192676168957041	0.313413191482327	0.473530248240581	0.353639249698096	0.750535349269735	0.549148298213934	1.04029870958431	1.13878759828855	0.984422278881481	0.950941443623349	0.830612200311295	3
102	P13864_S713	Dnmt1	-1.37338	0.189795577320781	-1.37338	0.223139008559952	-1.37338	-1.37338	0.390663134958629	0.45528082725593	-1.37338	0.404072133531342	0.445645760914542	-0.355556	0.447955742873576	0.386101947767497	-1.37338	1.16356969092364	1.07751099114678	1.18574546793579	1.11293883623663	1.11341124342615	2
103	P13864_T144	Dnmt1	-0.636211	-0.636211	1.21468631524251	-0.636211	-0.636211	1.62191822317101	1.59973055166353	-0.636211	-0.636211	1.51048109466311	-0.636211	-0.636211	-0.636211	-0.636211	-0.636211	-0.636211	-0.636211	1.53158900410083	-0.636211	1.42855093319827	1
104	P13864_T308	Dnmt1	-0.284333	-1.18187	-2.81986	-0.731252	-0.577188	-0.479884	-0.04695	-0.186264	-0.370069	-0.398671	0.35925255235066	0.255573126564543	-0.115557	0.213871214266872	0.129139191084855	1.40103195076392	1.36121888689768	1.22716055292099	1.24196926203327	1.00268770761439	2
105	P14733_S392	Lmnb1	-1.06975	-1.06975	-1.06975	-1.06975	-1.06975	0.710129818722354	-1.06975	-1.06975	0.712040277543016	-1.06975	0.821122736856833	0.934227237147616	-1.06975	1.03971290480971	0.799213893679972	1.07017107536725	1.03034115735452	1.0321910184715	0.570152530691158	0.908452921293176	2
106	P14733_S394	Lmnb1	-1.06975	-1.06975	-1.06975	-1.06975	-1.06975	0.710129818722354	-1.06975	-1.06975	0.712040277543016	-1.06975	0.821122736856833	0.934227237147616	-1.06975	1.03971290480971	0.799213893679972	1.07017107536725	1.03034115735452	1.0321910184715	0.570152530691158	0.908452921293176	2
107	P14873_S1438	Map1b	-0.48555	-0.48555	-0.48555	-0.48555	-0.48555	-0.48555	-0.48555	-0.48555	-0.48555	-0.48555	-0.48555	-0.48555	-0.48555	-0.48555	-0.48555	2.08517126232295	2.07343926984614	1.98398486404709	1.62621222939641	-0.48555	4
108	P14873_T527	Map1b	-0.486216	-0.486216	-0.486216	-0.486216	-0.486216	-0.486216	-0.486216	-0.486216	-0.486216	-0.486216	-0.486216	-0.486216	-0.486216	-0.486216	-0.486216	2.03136943109616	-0.486216	2.07072928524479	1.98291759416845	1.69444758539362	4
109	P15920_S695	Atp6v0a2	-0.760374	1.91696412129394	-0.760374	-0.760374	-0.760374	-0.760374	-0.760374	-0.760374	-0.760374	-0.760374	-0.760374	1.11708402989668	-0.760374	-0.760374	0.695195032953417	1.73108514826705	0.495578075062432	1.19391378274933	0.848219515491807	1.12645004580998	4
110	P17095_S36	Hmga1	-1.06479	-1.06479	-1.06479	-1.06479	-1.06479	0.695422728299368	-1.06479	-1.06479	1.10772011531315	-1.06479	1.01641806718464	0.583590703127558	0.834040262556383	1.17092196225697	1.00881928637187	0.54268664634861	0.716687440367476	0.977205700556501	0.929604788836557	-1.06479	3
111	P17095_S49	Hmga1	0.0422403920605045	-1.50809	-1.50809	-1.50809	-1.50809	0.99501186730406	0.427295666952742	1.16405435756648	0.653546156680455	1.07149831110345	0.867199619522894	0.691682964699486	0.987759523653014	0.773455429530605	-1.50809	-0.00393295	0.303690912661361	0.404984694127093	-0.65557	-0.182479	3
112	P17095_T53	Hmga1	-0.694563	-0.694563	-0.694563	-0.694563	-0.694563	-0.694563	1.84717617489901	-0.694563	1.67234641036901	1.66377378297099	-0.694563	-0.694563	-0.694563	-0.694563	0.876592458301909	0.821764142191879	-0.694563	-0.694563	1.1026720342998	1.04499826725699	3
113	P18654_S715	Rps6ka3	-3.10644	-0.868697	0.331329919368104	-2.2176	0.343326645332213	-0.269653	0.355071807338923	0.514449687535267	0.332085654600481	0.0164276272492028	0.482583348307505	0.806855551208058	0.764905978201324	0.514194513420714	0.523238691368328	0.412818357567299	0.226976171053015	0.0682815394995964	-0.0309478	0.800793115647416	3
114	P18760_S3	Cfl1	-0.356541	1.14906932552437	1.40182416021353	0.903451711027108	1.25010197384665	-0.45962	-0.761164	0.0554432712137857	-0.580986	-0.442003	-1.1099	-0.955218	-0.894519	-1.98157	-1.07715	1.55734543554637	0.798605117472778	0.577578660042138	0.576063422565293	0.349187058431678	4
115	P18760_S8	Cfl1	1.35876704773847	1.65424348397478	-0.833304	0.732958554365235	1.67407116335934	-0.833304	-0.225194	0.310833822020277	1.31471984139623	-0.833304	-0.833304	0.0965428528570475	-0.833304	-0.833304	-0.833304	-0.833304	-0.833304	-0.833304	-0.0811702	1.49726641368445	1
116	P19437_S219	Ms4a1	-0.633054	-0.633054	-0.633054	1.48357362557843	-0.633054	1.50659344093801	-0.633054	-0.633054	1.82985242276604	-0.633054	-0.633054	1.61183073496767	-0.633054	1.30922604137912	1.1216757175667	-0.633054	-0.633054	-0.633054	-0.633054	-0.633054	1
117	P23242_S341	Gja1	-0.518701	2.35621089484098	2.00073368197817	2.0275373522724	-0.518701	1.10064276722994	-0.518701	-0.518701	-0.518701	0.295388089177453	-0.518701	-0.518701	-0.518701	-0.518701	-0.518701	-0.518701	-0.518701	-0.518701	-0.518701	-0.518701	1
118	P26043_S532	Rdx	-1.2689	-1.2689	-1.2689	0.271910203266879	-1.2689	0.621225774299526	0.878390131247987	0.708104331471033	0.681856371123178	-1.2689	0.602217057438051	1.15263383525597	1.08764750368148	0.917376751184385	1.28758625708323	0.170280562420741	-1.2689	0.284854892208308	0.218237167217311	-1.2689	3
119	P27546_S254	Map4	-0.70727	-0.70727	-0.70727	-0.70727	-0.70727	-0.70727	-0.70727	-0.70727	-0.70727	-0.70727	1.21686710001418	1.21741584403739	-0.70727	-0.70727	1.19033779667177	1.27553887743112	1.46098024978981	1.83006167106431	-0.70727	1.00331186913152	2
120	P27546_S475	Map4	-1.05673	-1.05673	-1.05673	-1.05673	-1.05673	-1.05673	-1.05673	0.252643308276581	-1.05673	-1.05673	0.794451112065944	0.763885090375592	0.873719455566471	0.732659208463683	0.718890414514847	1.04182947484027	0.948997014241054	1.21131788545944	1.23087911696228	0.941301650512326	2
121	P27546_S517	Map4	-0.617738	-0.617738	-0.617738	-0.617738	-0.617738	-0.617738	-0.617738	-0.617738	-0.617738	-0.617738	-0.617738	0.881102330388796	-0.617738	-0.617738	0.757887872165329	1.78844778192032	-0.617738	1.79741940000709	1.61817547984704	1.80529965621238	4
122	P27546_S617	Map4	-0.861375	-0.861375	-0.861375	-0.861375	-0.861375	-0.861375	-0.861375	-0.861375	-0.861375	-0.861375	0.731768578182346	0.926266715669869	0.902312620435207	0.851311138028867	0.770364812128285	1.5450781788904	1.37732042889801	1.51562107130058	0.855081045256379	-0.861375	2
123	P27546_S667	Map4	-0.559031	-0.559031	-0.559031	-0.559031	-0.559031	-0.559031	-0.559031	-0.559031	-0.559031	-0.559031	-0.559031	-0.559031	-0.559031	-0.559031	-0.559031	2.00465457588374	1.53160770672873	1.74908149548577	1.7539560346477	1.34616372256439	4
124	P27546_T243	Map4	-1.12845	-1.12845	-1.12845	-1.12845	-1.12845	-1.12845	0.34823673236123	-1.12845	-1.12845	0.28238839404844	0.699842477532445	0.624904998788519	0.417551927827822	0.463198370839001	0.450299133077248	1.45550252980797	1.45812783589194	0.745221139941482	1.33419796093001	0.748148735780449	2
125	P27546_T652	Map4	-0.767228	-0.767228	-0.767228	-0.767228	-0.767228	-0.767228	-0.767228	-0.767228	-0.767228	-0.767228	-0.767228	0.628330734519071	-0.767228	0.803390895951207	0.545502902815051	1.45789013514044	1.15951242860886	1.61312891420619	1.62089004912402	1.37809237433446	4
126	P27546_T784	Map4	-1.67955	-1.67955	-1.67955	-1.67955	-1.67955	0.465259330798055	0.548783426660988	0.46292995358989	0.453079482602593	0.379096629651987	0.539722102269864	0.507320905270684	0.689136593691731	0.684612347424406	0.652763098805297	0.430294187025178	0.505272937856948	0.720253434850693	0.761344147822933	0.59786533133603	3
127	P27546_T802	Map4	-0.558515	-0.558515	-0.558515	-0.558515	-0.558515	-0.558515	-0.558515	-0.558515	-0.558515	-0.558515	-0.558515	-0.558515	-0.558515	-0.558515	-0.558515	1.54681860530005	1.43703533119693	1.50344302937871	1.81265713490043	2.07777048953001	4
128	P27612_T459	Plaa	-0.871893	-0.871893	-0.871893	-0.871893	-0.871893	-0.871893	-0.871893	1.06009021786319	1.07726009709936	0.961405652243016	-0.871893	1.07908924770775	1.4686554573277	1.2396959788506	1.19700479607881	0.783309508327386	-0.871893	0.724310905790408	-0.871893	-0.871893	3
129	P28867_S652	Prkcd	-0.559833	-0.559833	-0.559833	-0.559833	-0.559833	-0.559833	-0.559833	-0.559833	-0.559833	-0.559833	1.69984181031019	1.68828162420383	1.78137962519138	1.91043649072834	-0.559833	-0.559833	-0.559833	1.31755940242701	-0.559833	-0.559833	3
130	P35276_S10	Rab3d	-1.25814	-1.25814	-1.25814	-1.25814	-1.25814	-1.25814	-0.357382	0.595853854118787	0.464515985950687	0.539434518379071	0.548352629752455	0.490441363479843	0.709978754057015	0.586162991691483	-1.25814	1.05385987376129	1.19606748070822	1.13281140042891	0.848071009465099	0.998782634173184	2
131	P35276_S190	Rab3d	-0.477649	-0.477649	-0.477649	-0.477649	-0.477649	-0.477649	-0.477649	-0.477649	-0.477649	-0.477649	-0.477649	-0.477649	-0.477649	-0.477649	-0.477649	2.07918508125767	2.43295595670833	-0.477649	1.24250995455282	1.8877268225689	4
132	P35276_S199	Rab3d	-0.405868	-0.405868	-0.405868	-0.405868	-0.405868	-0.405868	-0.405868	-0.405868	-0.405868	-0.405868	-0.405868	-0.405868	-0.405868	-0.405868	-0.405868	-0.405868	2.58831691300515	2.47661351817927	1.8348313713047	-0.405868	4
133	P35276_S3	Rab3d	-1.43189	-1.43189	-1.43189	-1.43189	-1.43189	-0.440292	0.691188070626599	0.630251811801563	0.48416817837579	0.567498078432163	0.577417457594403	0.513004289394028	0.757189916400542	0.619472922101618	-1.43189	0.83852096601279	0.897218105902549	0.840363568226629	0.798953114608058	0.816396741601435	3
134	P35276_S5	Rab3d	-0.707557	-0.707557	-0.707557	-0.707557	-0.707557	-0.707557	1.33507528956693	-0.707557	-0.707557	-0.707557	-0.707557	1.1636432743837	-0.707557	-0.707557	-0.707557	0.793323935317427	1.53329840443913	1.47859820726815	1.43875688464958	1.45553953516296	4
135	P35276_Y21	Rab3d	-0.875323	-0.875323	-0.875323	-0.875323	-0.875323	0.798688041666059	-0.875323	1.04283201205732	0.929644239281596	1.08551859708435	-0.875323	-0.875323	0.90464714936868	1.36440940377027	1.0402291183587	-0.875323	1.30085295718561	-0.875323	-0.875323	1.16173180461867	3
136	P35564_S553	Canx	-0.927521	-0.927521	1.29084300573889	-0.927521	-0.927521	-0.927521	-0.927521	0.839278791220809	-0.927521	0.64505580091352	-0.927521	-0.927521	0.873465141713031	-0.927521	0.746184267685879	1.82780218916106	1.43442427071119	0.568002664778092	0.620136474226015	0.430020717998869	4
137	P35564_S569	Canx	1.26416859644034	-0.692026	-0.692026	-0.692026	-0.692026	1.07049904370047	-0.692026	-0.692026	0.763288347024426	1.11115158391115	-0.692026	-0.692026	-0.692026	-0.692026	-0.692026	1.97972556987059	1.82362402095183	0.983881854838844	-0.692026	-0.692026	4
138	P35564_S582	Canx	0.153577830012182	-0.370103	0.37672525893781	0.781483783647398	1.80584448734308	-1.68625	-0.594107	-1.4485	-0.974532	-0.809891	-0.542543	-0.892825	-0.101175	-0.398042	-0.030601	0.133920953516544	0.562841674569643	1.9760865410869	1.42076507734056	0.637331475762277	4
139	P35761_S277	Ttk	-0.550533	-0.550533	-0.550533	-0.550533	-0.550533	1.24876602647447	1.78590403070956	1.15678147157935	-0.550533	-0.550533	-0.550533	-0.550533	1.81161038672027	2.25493890546337	-0.550533	-0.550533	-0.550533	-0.550533	-0.550533	-0.550533	1
140	P39447_S1614	Tjp1	0.790285509639066	0.358008650378295	0.722624059449614	0.532816445616562	0.764826483112265	0.406834360321522	0.497194503817802	-2.52772	0.663943794789175	0.545788705517432	0.523132485498923	0.732021739504734	-2.52772	0.180934388006583	0.775631349748458	-0.225269	-0.501786	-0.265773	-0.544104	-0.901674	1
141	P40336_S315	Vps26a	-0.484797	-0.484797	-0.484797	-0.484797	-0.484797	-0.484797	-0.484797	-0.484797	-0.484797	-0.484797	-0.484797	-0.484797	-0.484797	-0.484797	-0.484797	1.57089048470784	-0.484797	2.03441756079541	1.98695679931288	2.16448643928207	4
142	P40630_T17	Tfam	-0.483904	-0.483904	-0.483904	-0.483904	-0.483904	-0.483904	-0.483904	-0.483904	-0.483904	-0.483904	1.98849552085505	1.50015045859878	2.10130760455485	-0.483904	2.15251612937675	-0.483904	-0.483904	-0.483904	-0.483904	-0.483904	1
143	P42208_S218	Septin2	-0.48091	-0.48091	-0.48091	-0.48091	-0.48091	-0.48091	-0.48091	-0.48091	-0.48091	-0.48091	-0.48091	-0.48091	-0.48091	-0.48091	-0.48091	2.13630231440927	2.15814132898225	2.08597985121751	-0.48091	1.31413118003357	4
144	P42208_Y211	Septin2	1.66272641721542	-0.702657	1.60746937379491	-0.702657	1.53249692146128	-0.702657	-0.702657	1.31961504764681	1.28399554470935	-0.702657	-0.702657	-0.702657	-0.702657	-0.702657	-0.702657	0.886164873860238	-0.702657	-0.702657	0.842067587770613	-0.702657	1
145	P42567_S816	Eps15	-0.709589	-0.709589	-0.709589	-0.709589	-0.709589	-0.709589	-0.709589	1.01939665763094	-0.709589	-0.709589	1.42110342662232	-0.709589	-0.709589	1.49965273679117	1.22933264605431	1.07150073174678	-0.709589	1.62616267586418	1.35751202131112	-0.709589	2
146	P45591_S3	Cfl2	0.791209752188409	1.91134785689446	1.79954711427762	0.819976303117748	1.34975573505462	-0.117171	0.00709934298349194	0.21737476035504	0.0810757020605523	-0.624143	-1.32145	-0.925773	-0.7183	-1.34383	-1.86491	-0.0888382	0.0255135302944107	-0.0691599	0.272154583497831	-0.201475	1
147	P45591_T6	Cfl2	-0.852505	-0.852505	1.52803129611247	1.34443857563722	0.71933081407272	0.171544163674784	1.14649893441663	-0.852505	1.16451255110482	-0.852505	-0.852505	-0.852505	-0.852505	-0.852505	-0.852505	-0.852505	-0.852505	1.08065741072521	1.17495032573884	1.0475919231718	1
148	P47955_S101	Rplp1	-1.07294	-1.07294	-1.07294	-1.07294	-1.07294	0.861058786741725	-1.07294	1.03268062437352	1.07290273102813	1.03763958248559	0.853846378294971	-1.07294	0.819370555640736	-1.07294	-1.07294	0.660651128097665	0.837545397531011	0.843986917068966	0.900037692711828	0.736739731137664	3
149	P47955_S104	Rplp1	-1.07294	-1.07294	-1.07294	-1.07294	-1.07294	0.861058786741725	-1.07294	1.03268062437352	1.07290273102813	1.03763958248559	0.853846378294971	-1.07294	0.819370555640736	-1.07294	-1.07294	0.660651128097665	0.837545397531011	0.843986917068966	0.900037692711828	0.736739731137664	3
150	P48678_S390	Lmna	-0.559716	-0.559716	-0.559716	-0.559716	-0.559716	-0.559716	-0.559716	-0.559716	-0.559716	-0.559716	-0.559716	-0.559716	-0.559716	-0.559716	-0.559716	1.58596569375808	1.59873708386428	1.63383961550526	1.50405617237918	2.07313958835775	4
151	P48678_S392	Lmna	-0.559716	-0.559716	-0.559716	-0.559716	-0.559716	-0.559716	-0.559716	-0.559716	-0.559716	-0.559716	-0.559716	-0.559716	-0.559716	-0.559716	-0.559716	1.58596569375808	1.59873708386428	1.63383961550526	1.50405617237918	2.07313958835775	4
152	P51125_S219	Cast	-0.560572	-0.560572	-0.560572	-0.560572	1.89121372378269	1.38429588796637	-0.560572	1.64560100696068	-0.560572	1.7895509715377	-0.560572	-0.560572	-0.560572	-0.560572	-0.560572	-0.560572	1.69791813473636	-0.560572	-0.560572	-0.560572	1
153	P51125_T479	Cast	-0.486497	-0.486497	-0.486497	-0.486497	-0.486497	-0.486497	-0.486497	-0.486497	-0.486497	-0.486497	-0.486497	-0.486497	-0.486497	-0.486497	-0.486497	-0.486497	1.77063528904318	1.91796843018323	2.12966731102383	1.96567973562034	4
154	P51859_S165	Hdgf	-0.484615	-0.484615	-0.484615	-0.484615	-0.484615	-0.484615	-0.484615	-0.484615	-0.484615	-0.484615	-0.484615	-0.484615	-0.484615	-0.484615	-0.484615	1.62233044482926	-0.484615	1.81743967732516	2.18675339736821	2.12730957876525	4
155	P52293_S54	Kpna2	-1.65793	-1.65793	-1.65793	-1.65793	-1.65793	0.341333079991999	0.173723451538566	0.355518868949762	0.444592634238274	0.335126076101548	0.684712230350451	0.537504106523427	0.835748642803258	0.603897394203553	0.278486646641661	0.698720954248727	0.870292305763448	0.775893998588086	0.74950439453595	0.604572928891628	3
156	P52293_S62	Kpna2	-0.699291	-0.699291	-0.699291	-0.699291	-0.699291	-0.699291	1.32332009381917	-0.699291	-0.699291	-0.699291	-0.699291	-0.699291	1.53192302106589	-0.699291	-0.699291	1.40371806316784	1.56283095257481	1.47836809708388	0.480991391271943	1.30963356170769	4
157	P52293_T61	Kpna2	-1.47521	-1.47521	-1.47521	-1.47521	-1.47521	0.385040226636644	0.628148824626182	0.398239707572026	0.481120361603256	-1.47521	0.704544948034865	0.580262344032971	0.845080116903871	0.629348997200334	0.420500847699161	0.71757967487134	0.877222031748288	0.789387040010895	0.764832249536036	0.629977563384631	3
158	P54227_S31	Stmn1	-0.788449	-0.788449	-0.788449	-0.788449	-0.788449	1.28533767181045	-0.788449	1.41523443459998	-0.788449	-0.788449	-0.788449	1.04798363779639	1.49780916124982	-0.788449	-0.788449	1.13294569015413	1.03927801815679	-0.788449	1.23741596356214	0.805380037263213	2
159	P54227_S38	Stmn1	-1.31035	0.3410207690144	-1.31035	-1.31035	0.590397976716855	0.327935789357428	0.960985150943163	0.807772314236885	0.64906098590574	0.655186419494417	0.810305293758788	-1.31035	1.02305039552136	0.857345321421591	0.743848730174208	-1.31035	-1.31035	0.738595951198703	0.666949238696761	-1.31035	1
160	P54227_S63	Stmn1	-0.549722	-0.549722	-0.549722	-0.549722	-0.549722	-0.549722	-0.549722	-0.549722	-0.549722	-0.549722	-0.549722	-0.549722	-0.549722	-0.549722	-0.549722	1.8188602039317	0.972153269581755	1.38525291860302	1.95076901605896	2.11880124249129	4
161	P54728_S160	Rad23b	-1.15197	-1.15197	-1.15197	-1.15197	-1.15197	0.879947190741392	-1.15197	-1.15197	-1.15197	0.957125727417748	0.71958149552501	1.11307987437023	1.26771595821234	1.06451407636094	0.37701375408974	0.385607858352848	0.78530053922818	1.01441158745282	0.17171087641954	0.479775461640143	2
162	P54728_S166	Rad23b	-0.878636	-0.878636	-0.878636	-0.878636	-0.878636	0.930647576295901	-0.878636	0.979076562295061	-0.878636	-0.878636	1.22217487471198	-0.878636	1.20687960640983	0.981534038627356	1.03270634099933	-0.878636	-0.878636	1.0503787839385	0.985185486769947	1.27641597667404	3
163	P54728_T155	Rad23b	-1.47486	-1.47486	-1.47486	-1.47486	-1.47486	0.536254313168557	0.61308181472364	0.590085682182195	0.655926947798086	0.612642577813371	0.784086612805991	0.669827966507201	0.749788786331489	0.592817296577103	-1.47486	0.787379572674425	0.208551459095725	0.606912436311821	0.516895972354019	0.924908663177869	3
164	P54728_T159	Rad23b	-1.4385	-1.4385	-1.4385	-1.4385	-1.4385	0.620315847389407	0.698965484467528	0.675423947361987	0.742813640502977	0.698515830074444	0.952038287976717	0.153946914746909	0.217028810076545	0.205315577190078	0.83143185816478	0.949616322499453	0.142886055098058	0.692649785489093	-1.4385	1.05003090163426	3
165	P55258_S181	Rab8a	-0.781444	-0.781444	-0.781444	-0.781444	-0.781444	-0.781444	-0.781444	0.995007689957129	-0.781444	0.821817796047167	-0.781444	-0.781444	1.3742763050518	-0.781444	-0.781444	1.66765871693406	0.807615023320587	1.08053898363397	1.14540225030429	1.48500822194209	4
166	P56399_T623	Usp5	-0.550673	-0.550673	-0.550673	-0.550673	-0.550673	-0.550673	-0.550673	-0.550673	-0.550673	-0.550673	2.02382968095954	1.45501356407383	-0.550673	1.9578050888567	1.86970697866686	0.953744112239471	-0.550673	-0.550673	-0.550673	-0.550673	3
167	P56812_S119	Pdcd5	-1.60253	-1.60253	0.625012802721666	0.472104766616522	0.480092434195608	-1.60253	-1.60253	0.169300363684619	0.184667377443814	-1.60253	0.359727064201156	0.454800067239775	-0.0921359	0.575020386718498	0.134263408283477	1.01324521386992	0.859895958788613	0.544075063863042	1.06602631256124	1.16654262147909	2
168	P57776_S133	Eef1d	-0.629425	-0.629425	-0.629425	-0.629425	-0.629425	-0.629425	-0.629425	-0.629425	-0.629425	-0.629425	1.72859226236112	-0.629425	1.78798438324239	-0.629425	-0.629425	1.32701818274679	1.46275015741398	0.914455326541748	-0.629425	1.59115370777376	2
169	P57776_T129	Eef1d	-0.554468	-0.554468	-0.554468	-0.554468	-0.554468	-0.554468	-0.554468	-0.554468	-0.554468	-0.554468	-0.554468	-0.554468	-0.554468	-0.554468	-0.554468	1.45270783240122	2.03656479113133	1.17199713309815	1.63458045587238	2.02116289661982	4
170	P57776_T147	Eef1d	0.750714928855131	0.431505349839579	0.733815715079681	0.701616367461717	0.293867537667981	-3.71554	0.370651768262685	0.319946458503938	0.31860858515856	0.262163899102489	0.324357210444894	0.405796096664788	0.292884696505893	-1.37136	0.0132011888387575	0.27942097014599	-0.543804	0.0328632398761441	0.438006699387015	-0.338721	1
171	P58742_S495	Aaas	-1.63311	-1.63311	-1.63311	-1.63311	-1.63311	0.236765221569324	0.260691986330214	0.285592393787018	0.607452976475978	0.504211449687142	0.602898361864798	0.510697048763273	0.595553951636531	0.54823786235088	0.69659928620794	1.09438185401192	0.639312728003533	0.763628736798497	-0.112683	0.932193490445112	3
172	P58871_S1370	Tnks1bp1	-0.40575	-0.40575	-0.40575	-0.40575	-0.40575	-0.40575	-0.40575	-0.40575	-0.40575	-0.40575	-0.40575	-0.40575	-0.40575	-0.40575	-0.40575	-0.40575	-0.40575	2.58905552056174	2.48269963410776	1.82598919964539	4
173	P59242_S250	Cgn	-0.710915	-0.710915	-0.710915	-0.710915	-0.710915	-0.710915	-0.710915	1.50903256586417	-0.710915	-0.710915	1.02475147425086	1.1181515919178	1.43825730245653	1.25932337183806	-0.710915	-0.710915	-0.710915	1.36006670740262	-0.710915	1.5323118681299	3
174	P59242_S326	Cgn	2.26930718218793	-0.409385	2.31359989738039	2.37663061485582	-0.409385	-0.409385	-0.409385	-0.409385	-0.409385	-0.409385	-0.409385	-0.409385	-0.409385	-0.409385	-0.409385	-0.409385	-0.409385	-0.409385	-0.409385	-0.409385	1
175	P59242_S84	Cgn	-0.406258	-0.406258	-0.406258	-0.406258	-0.406258	-0.406258	-0.406258	-0.406258	-0.406258	-0.406258	-0.406258	-0.406258	-0.406258	-0.406258	-0.406258	2.33357350287951	2.6693846477085	1.90342961755903	-0.406258	-0.406258	4
176	P59325_S387	Eif5	-0.556077	-0.556077	-0.556077	-0.556077	-0.556077	-0.556077	-0.556077	-0.556077	-0.556077	-0.556077	-0.556077	-0.556077	-0.556077	-0.556077	-0.556077	1.66855224593702	1.4795894757654	1.46146028073564	1.48479101635219	2.24676448264197	4
177	P59325_S388	Eif5	-0.556077	-0.556077	-0.556077	-0.556077	-0.556077	-0.556077	-0.556077	-0.556077	-0.556077	-0.556077	-0.556077	-0.556077	-0.556077	-0.556077	-0.556077	1.66855224593702	1.4795894757654	1.46146028073564	1.48479101635219	2.24676448264197	4
178	P59325_S404	Eif5	-0.409336	-0.409336	-0.409336	-0.409336	-0.409336	-0.409336	-0.409336	-0.409336	-0.409336	-0.409336	-0.409336	-0.409336	-0.409336	-0.409336	-0.409336	2.40044641616558	-0.409336	-0.409336	2.29527139141574	2.26299273165446	4
179	P59325_Y403	Eif5	-0.409336	-0.409336	-0.409336	-0.409336	-0.409336	-0.409336	-0.409336	-0.409336	-0.409336	-0.409336	-0.409336	-0.409336	-0.409336	-0.409336	-0.409336	2.40044641616558	-0.409336	-0.409336	2.29527139141574	2.26299273165446	4
180	P62492_S190	Rab11a	-0.477808	-0.477808	-0.477808	-0.477808	-0.477808	-0.477808	-0.477808	-0.477808	-0.477808	-0.477808	-0.477808	-0.477808	-0.477808	-0.477808	-0.477808	1.9970817017542	1.27701674487247	2.48209589458937	1.88872738131305	-0.477808	4
181	P62500_S1051	Tsc22d1	-0.409401	-0.409401	-0.409401	-0.409401	-0.409401	-0.409401	-0.409401	-0.409401	-0.409401	-0.409401	-0.409401	-0.409401	-0.409401	-0.409401	-0.409401	2.35170247983262	2.34139738775959	2.26671547346958	-0.409401	-0.409401	4
182	P62500_T1033	Tsc22d1	-0.78295	-0.78295	-0.78295	-0.78295	-0.78295	0.772953328916081	0.872394683826597	-0.78295	-0.78295	0.915567696680748	-0.78295	-0.78295	-0.78295	-0.78295	-0.78295	1.50899090179499	1.50043683474201	1.43844475374418	1.22181861347764	1.16479487880621	4
183	P62500_T1049	Tsc22d1	-0.561179	-0.561179	-0.561179	-0.561179	-0.561179	-0.561179	-0.561179	-0.561179	-0.561179	-0.561179	-0.561179	-0.561179	1.55452088807366	-0.561179	-0.561179	1.87844073700697	-0.561179	1.83808358569392	1.60411216479751	1.54252253295771	4
184	P62878_T9	Rbx1	-0.951866	-0.951866	-0.951866	-0.951866	-0.951866	-0.951866	-0.951866	-0.951866	-0.951866	1.04697381032935	-0.951866	1.33786036551473	1.20463525622389	1.24382766217416	0.979409454338389	0.491612015947301	0.719289353141504	0.524459510028987	1.23049861140102	0.740096088989396	2
185	P62908_T220	Rps3	-0.706767	-0.706767	-0.706767	-0.706767	-0.706767	-0.706767	-0.706767	-0.706767	-0.706767	-0.706767	1.06822380222466	1.08626466504943	-0.706767	1.10903057010644	1.19875635293146	1.43796642401462	-0.706767	1.79533470414943	-0.706767	1.49239249484412	2
186	P62996_S2	Tra2b	-0.482281	-0.482281	-0.482281	-0.482281	-0.482281	-0.482281	-0.482281	-0.482281	-0.482281	-0.482281	-0.482281	-0.482281	-0.482281	-0.482281	-0.482281	2.10412320261203	1.57604141698469	1.68552720536309	-0.482281	2.35079665026411	4
187	P63085_T179	Mapk1	-0.970428	-0.970428	-0.970428	-0.970428	-0.970428	-0.970428	0.900356804749296	-0.970428	-0.970428	0.811069487684323	0.84771137251685	0.984909206914198	-0.970428	-0.970428	1.03712072018064	1.03518748118571	1.20531953804864	0.912223143826667	1.14668923162877	0.823696643196937	2
188	P63085_T183	Mapk1	-1.06598	-1.06598	-1.06598	-1.06598	-1.06598	-1.06598	0.687458785933749	-1.06598	-1.06598	0.603772049884487	0.638115558516242	1.10650423537065	-1.06598	0.898179348049615	0.815644132610005	1.06289510741754	0.973292615478793	0.698580804366852	1.20076236924699	0.908621011185527	2
189	P63085_T188	Mapk1	-0.703393	-0.703393	-0.703393	-0.703393	-0.703393	1.33303657668226	-0.703393	1.22187682416063	1.05648265004478	-0.703393	-0.703393	-0.703393	1.3551532254004	1.67585080119202	-0.703393	0.799304829659534	1.70240171980983	-0.703393	-0.703393	-0.703393	3
190	P63085_Y185	Mapk1	-0.958862	-0.958862	-0.958862	-0.958862	-0.958862	0.848647393489129	-0.958862	0.749983356154321	0.603181509265099	-0.958862	-0.958862	1.01157186566583	0.868277860500311	1.51826107035401	-0.958862	1.02596529905292	1.17649137878967	-0.958862	1.04303951168858	0.743205155223933	3
191	P68373_T41	Tuba1c	-0.791242	-0.791242	-0.791242	-0.791242	-0.791242	-0.791242	-0.791242	-0.791242	-0.791242	1.06420598241729	1.16760426237465	1.11840472803435	-0.791242	1.00074213120525	-0.791242	1.06226460369887	1.16517065113333	1.46116545894832	1.45535049781158	-0.791242	2
192	P70166_S245	Cpeb1	-1.38629	-0.0904799	-1.38629	-1.38629	-1.38629	0.860968805432862	1.17022153326436	1.08528610203791	1.13308726187129	0.910591969521095	0.806507750873814	0.759705203875012	0.761669602843766	0.609520949395585	0.85265102904307	-0.442557	-1.38629	-0.803606	-0.359865	-0.322275	1
193	P70166_S248	Cpeb1	-0.617386	0.957562746691972	0.777015547660188	-0.617386	-0.617386	-0.617386	1.94349551498082	1.84459581009887	-0.617386	1.77695847560612	-0.617386	-0.617386	-0.617386	1.34377	-0.617386	-0.617386	-0.617386	-0.617386	-0.617386	-0.617386	1
194	P70166_S81	Cpeb1	-0.633913	-0.633913	-0.633913	-0.633913	-0.633913	1.61221338658586	1.72541444862637	-0.633913	1.69672908708364	-0.633913	1.2518485659733	-0.633913	-0.633913	1.32179485524401	1.26677678009787	-0.633913	-0.633913	-0.633913	-0.633913	-0.633913	1
195	P70166_S85	Cpeb1	-0.869697	0.790583837889463	-0.869697	-0.869697	-0.869697	-0.869697	1.50697749798175	1.30340028059843	1.0399921610983	1.33082197505247	0.923245299374963	0.870033215951048	0.90861688112018	-0.869697	0.892997383796488	-0.869697	-0.869697	-0.869697	-0.869697	-0.869697	1
196	P70166_T247	Cpeb1	-0.702108	-0.702108	-0.702108	0.814389296637081	0.846008414246778	1.64620419639353	-0.702108	-0.702108	-0.702108	1.48717265001247	1.47132463964919	1.55317749080147	-0.702108	1.30912106953618	-0.702108	-0.702108	-0.702108	-0.702108	-0.702108	-0.702108	1
197	P70166_T80	Cpeb1	0.390635040168807	0.0679839847613688	0.420751917623642	0.230728020097617	0.435574167460922	0.808373718234282	1.08427350517411	0.86448179197436	0.900325992390803	0.88269617165688	0.472244809089852	0.355408875580079	0.450523090132561	0.380406613060171	0.432541992810509	-1.63539	-1.63539	-1.63539	-1.63539	-1.63539	1
198	P70288_S394	Hdac2	2.3453998878468	-0.40933	-0.40933	2.2364769353253	2.37674068897844	-0.40933	-0.40933	-0.40933	-0.40933	-0.40933	-0.40933	-0.40933	-0.40933	-0.40933	-0.40933	-0.40933	-0.40933	-0.40933	-0.40933	-0.40933	1
199	P70398_S1600	Usp9x	-0.48323	-0.48323	-0.48323	-0.48323	-0.48323	-0.48323	-0.48323	-0.48323	-0.48323	-0.48323	-0.48323	-0.48323	-0.48323	-0.48323	-0.48323	1.84892386285712	1.95906486159272	2.35535447433834	-0.48323	1.56833452714591	4
200	P70398_S2547	Usp9x	-0.77894	-0.77894	-0.77894	-0.77894	-0.77894	-0.77894	-0.77894	-0.77894	0.74624403054821	-0.77894	0.880928800453401	-0.77894	-0.77894	0.716188758677592	-0.77894	1.41512755697552	1.58729356941175	1.27979973531918	1.42936251500505	1.29233657739709	4
201	P70398_T2551	Usp9x	-0.551523	-0.551523	-0.551523	-0.551523	-0.551523	-0.551523	-0.551523	-0.551523	-0.551523	-0.551523	-0.551523	0.929273755774663	-0.551523	-0.551523	-0.551523	1.8444288438279	2.03243645342441	1.60672762562707	1.85997361014947	-0.551523	4
202	P70398_Y2540	Usp9x	-0.946539	-0.946539	-0.946539	-0.946539	-0.946539	0.466550041733199	-0.946539	-0.946539	0.642038027347594	-0.946539	0.734013940073585	-0.946539	0.772047997784427	-0.946539	0.647874950653425	1.00844240651745	1.51804526233597	1.11200344277771	1.35354990279204	1.21082856810368	2
203	P70670_S2123	Naca	-0.560236	-0.560236	-0.560236	-0.560236	-0.560236	-0.560236	-0.560236	-0.560236	-0.560236	-0.560236	-0.560236	-0.560236	-0.560236	-0.560236	-0.560236	1.81709437201682	1.80133299305077	1.32472979396092	1.68932032793669	1.77106835385485	4
204	P97379_S141	G3bp2	-0.408228	-0.408228	-0.408228	-0.408228	-0.408228	-0.408228	-0.408228	-0.408228	-0.408228	-0.408228	-0.408228	-0.408228	-0.408228	-0.408228	-0.408228	2.04318072038119	-0.408228	2.40630060284887	-0.408228	2.49039685138459	4
205	P97379_S149	G3bp2	-0.408228	-0.408228	-0.408228	-0.408228	-0.408228	-0.408228	-0.408228	-0.408228	-0.408228	-0.408228	-0.408228	-0.408228	-0.408228	-0.408228	-0.408228	2.04318072038119	-0.408228	2.40630060284887	-0.408228	2.49039685138459	4
206	P97379_S225	G3bp2	0.252554951114968	-0.309952	-0.157141	-0.123407	-3.92332	-0.0137694	-0.378225	-0.160876	-0.426162	0.209054958027176	0.658357937263807	0.644037781081752	0.973014697414413	0.444414072118048	0.559881926465605	0.18837698663608	0.569870231221619	0.323285857469134	0.430406992067751	0.239593964597222	3
207	P97379_S235	G3bp2	-0.684282	-0.684282	-0.684282	-0.684282	-0.684282	-0.684282	-0.684282	-0.684282	-0.684282	-0.684282	-0.684282	-0.684282	1.90234841674737	1.6230997302557	-0.684282	0.474310244742815	1.1239891955136	1.55911022055956	0.724261788289288	1.48854675156366	2
208	P97440_S20	Slbp	-0.561796	-0.561796	-0.561796	-0.561796	-0.561796	-0.561796	-0.561796	-0.561796	-0.561796	-0.561796	-0.561796	-0.561796	-0.561796	-0.561796	-0.561796	1.6416560046891	1.48374525614227	1.78277306100381	1.76775030997813	1.75100858591282	4
209	P97440_S23	Slbp	-0.561796	-0.561796	-0.561796	-0.561796	-0.561796	-0.561796	-0.561796	-0.561796	-0.561796	-0.561796	-0.561796	-0.561796	-0.561796	-0.561796	-0.561796	1.6416560046891	1.48374525614227	1.78277306100381	1.76775030997813	1.75100858591282	4
210	P97825_S131	Jpt1	-1.39998	-1.39998	-1.39998	-1.39998	-1.39998	-1.39998	0.710689087291827	0.924072811933818	1.01810689047206	0.647671662753152	0.709467023746457	0.44741159476922	0.906137087515947	1.02073187781203	1.03058	0.296064918187321	-0.474522	0.344831501294909	0.531479257886854	0.28717202721543	3
211	P97825_S140	Jpt1	-0.932922	-0.932922	-0.932922	-0.932922	-0.932922	1.20573713664447	1.08519350944491	1.06821316701038	-0.932922	1.33466380634252	1.25177823814492	0.792368628339095	0.853261977422643	1.31529532308678	0.195128247093544	-0.932922	-0.932922	0.22757536230177	-0.932922	-0.932922	1
212	P97825_S49	Jpt1	-0.39384	-0.39384	-0.39384	-0.39384	-0.39384	-0.39384	-0.39384	-0.39384	-0.39384	-0.39384	-0.39384	-0.39384	-0.39384	-0.39384	-0.39384	-0.39384	2.87033066755745	1.27637078177643	2.54857	-0.39384	4
213	P97825_S85	Jpt1	-1.31665	-1.31665	-1.31665	-1.31665	0.651493849264105	-1.31665	0.464707647892145	0.540105853077472	-1.31665	0.611497452568506	0.580746370017422	0.666468473466045	0.902838190940287	0.897473130732047	0.725100011565093	0.562523421186351	-1.31665	0.923012667160627	0.975435248639067	0.715123568385088	3
214	P97825_T110	Jpt1	-0.635243	-0.635243	-0.635243	-0.635243	-0.635243	-0.635243	1.5398976324686	1.4259567212144	1.57628257678509	-0.635243	-0.635243	1.16004302427442	1.48701339774583	1.70420625478767	-0.635243	-0.635243	-0.635243	-0.635243	-0.635243	-0.635243	1
215	P98078_S393	Dab2	-0.408907	-0.408907	-0.408907	-0.408907	-0.408907	-0.408907	-0.408907	-0.408907	-0.408907	-0.408907	-0.408907	-0.408907	-0.408907	-0.408907	-0.408907	2.14353292009202	-0.408907	-0.408907	2.45337791285424	2.35451012829377	4
216	P98078_S394	Dab2	-0.408907	-0.408907	-0.408907	-0.408907	-0.408907	-0.408907	-0.408907	-0.408907	-0.408907	-0.408907	-0.408907	-0.408907	-0.408907	-0.408907	-0.408907	2.14353292009202	-0.408907	-0.408907	2.45337791285424	2.35451012829377	4
217	P98191_T33	Cds1	-1.17149	-1.17149	-1.17149	-1.17149	-1.17149	0.592801867633108	0.797059183634296	0.458710966541815	0.585156372641763	-1.17149	0.651215505022769	0.695841295763474	0.725383441694424	0.661693856555866	0.820551374002332	1.21208247121971	1.31930860601901	-1.17149	-1.17149	0.852097250549626	3
218	P99027_S102	Rplp2	-1.66997	-1.66997	-1.66997	-1.66997	-1.66997	0.578714917887602	0.880258745067741	0.686698093384083	0.436236125109083	0.526264296933615	0.585161956754034	0.52140703142028	0.711781619367264	0.262257934261648	0.353482973885612	0.662704364030169	0.27395982060116	0.710226915523155	0.563420381084259	0.597263545088171	3
219	P99027_S105	Rplp2	-1.66997	-1.66997	-1.66997	-1.66997	-1.66997	0.578714917887602	0.880258745067741	0.686698093384083	0.436236125109083	0.526264296933615	0.585161956754034	0.52140703142028	0.711781619367264	0.262257934261648	0.353482973885612	0.662704364030169	0.27395982060116	0.710226915523155	0.563420381084259	0.597263545088171	3
220	P99027_S64	Rplp2	-0.621181	-0.621181	-0.621181	-0.621181	-0.621181	-0.621181	-0.621181	-0.621181	-0.621181	-0.621181	-0.621181	-0.621181	1.86658824853347	1.46001637543552	-0.621181	1.67210210649404	-0.621181	0.643012029112626	1.75842972336898	1.29639	2
221	Q02053_S46	Uba1	-0.632841	-0.632841	-0.632841	-0.632841	-0.632841	-0.632841	-0.632841	-0.632841	-0.632841	-0.632841	-0.632841	1.01604536627406	-0.632841	-0.632841	-0.632841	1.69174660810114	1.55481451716009	1.41439142547515	1.50245226819101	1.68032700560133	4
222	Q05915_S24	Gch1	-0.560471	-0.560471	-0.560471	-0.560471	-0.560471	-0.560471	-0.560471	-0.560471	-0.560471	-0.560471	-0.560471	-0.560471	-0.560471	-0.560471	-0.560471	1.63190601325932	1.9292138908462	1.83940398451836	1.5085239050536	1.49801561749095	4
223	Q05A80_S391	Caprin2	-0.48708	-0.48708	-0.48708	-0.48708	-0.48708	-0.48708	-0.48708	-0.48708	1.9728014328324	-0.48708	2.0160502106671	1.82872231660123	1.97570716970761	-0.48708	-0.48708	-0.48708	-0.48708	-0.48708	-0.48708	-0.48708	1
224	Q05A80_S634	Caprin2	0.588974016909019	0.44145608600044	0.733458762156602	0.790266375325999	0.87745986843761	0.693902232527731	0.646027806056564	0.682639	0.968379722438376	0.779598193738174	-0.0806746	0.127508061504827	0.409879939766215	0.239523410611254	0.256769709819351	-1.63103	-1.63103	-1.63103	-1.63103	-1.63103	1
225	Q05A80_S638	Caprin2	-0.859901	1.13955538155959	1.42126805601652	-0.859901	1.22476962457368	1.0247167360446	0.934252571978357	1.02645660793271	1.51407500871078	-0.859901	-0.859901	-0.859901	0.375029593568321	-0.859901	0.798789194835996	-0.859901	-0.859901	-0.859901	-0.859901	-0.859901	1
226	Q3B7Z2_S333	Osbp	-0.561186	-0.561186	-0.561186	-0.561186	-0.561186	-0.561186	-0.561186	-0.561186	-0.561186	-0.561186	-0.561186	-0.561186	-0.561186	-0.561186	-0.561186	1.5291479831215	1.91938166471084	1.55970536200182	1.63941178841974	1.77013800920697	4
227	Q3B7Z2_S336	Osbp	-0.561186	-0.561186	-0.561186	-0.561186	-0.561186	-0.561186	-0.561186	-0.561186	-0.561186	-0.561186	-0.561186	-0.561186	-0.561186	-0.561186	-0.561186	1.5291479831215	1.91938166471084	1.55970536200182	1.63941178841974	1.77013800920697	4
228	Q3THE2_S29	Myl12b	-0.483657	2.00806453202133	2.3411352624912	1.68261791590058	-0.483657	-0.483657	-0.483657	1.70668711505312	-0.483657	-0.483657	-0.483657	-0.483657	-0.483657	-0.483657	-0.483657	-0.483657	-0.483657	-0.483657	-0.483657	-0.483657	1
229	Q3TLH4_S102	Prrc2c	-0.779073	-0.779073	-0.779073	-0.779073	-0.779073	-0.779073	-0.779073	-0.779073	-0.779073	-0.779073	1.05091415874468	1.41090844405675	1.35924827614175	-0.779073	-0.779073	0.881762094441895	1.06154627457624	0.791783004555556	0.982242346130125	1.81046987851407	2
230	Q3TWL2_S169	Pip4p1	-1.01139	-1.01139	-1.01139	-1.01139	-1.01139	0.811214086498241	1.08267320700319	0.644305340002156	1.13974793816192	1.36397171805075	1.00615952864572	0.622840066113119	0.852075944121776	1.10026646960288	0.924171907239266	-1.01139	-0.444882	-1.01139	-1.01139	-1.01139	1
231	Q3TXS7_S290	Psmd1	-0.486042	-0.486042	-0.486042	-0.486042	-0.486042	-0.486042	-0.486042	-0.486042	-0.486042	-0.486042	-0.486042	-0.486042	-0.486042	-0.486042	-0.486042	1.91884471554721	1.69601152332326	2.05436058520476	2.10746017410753	-0.486042	4
232	Q3TXS7_T270	Psmd1	-0.707268	-0.707268	-0.707268	-0.707268	-0.707268	-0.707268	-0.707268	-0.707268	1.09859061959205	-0.707268	-0.707268	1.29824276322832	1.76142565278742	1.34434645301155	-0.707268	0.915884253728539	-0.707268	-0.707268	1.3499983740715	1.42599787965777	2
233	Q3U5C8_S231	Arhgef16	-0.841385	-0.841385	-0.841385	-0.841385	-0.841385	0.0978934738228996	1.08091632671018	-0.841385	-0.841385	-0.841385	-0.841385	1.02777510526003	-0.841385	0.998544216959978	0.49053786460173	1.39430592389351	-0.841385	1.31152148067296	1.47538320714763	1.37835265011052	2
234	Q3U5C8_T230	Arhgef16	-0.841385	-0.841385	-0.841385	-0.841385	-0.841385	0.0978934738228996	1.08091632671018	-0.841385	-0.841385	-0.841385	-0.841385	1.02777510526003	-0.841385	0.998544216959978	0.49053786460173	1.39430592389351	-0.841385	1.31152148067296	1.47538320714763	1.37835265011052	2
235	Q3UGC7_T112	Eif3j1	-1.36721	-1.36721	-1.36721	-1.36721	-1.36721	0.245808094734005	-0.129731	-1.36721	-0.160649	0.33282152201429	0.396332628060738	0.414225669290126	0.832659010254851	0.209770213470818	0.478432338396172	1.25152530236183	1.13827842438367	1.00953667311205	1.15944094660384	1.02481189977697	2
236	Q3UH66_S107	Wnk2	-1.39162	-1.39162	-1.39162	-1.39162	-1.39162	0.75502111820451	0.771387836020329	0.873596458056109	0.738455637179442	0.774005169768841	0.842136611131533	0.862955084525558	0.72089309554622	0.873232621404797	0.776932544167591	0.147457991305699	0.584429545747423	0.332242236106381	-1.39162	-0.703003	3
237	Q3UH66_S1661	Wnk2	-0.561701	-0.561701	-0.561701	-0.561701	-0.561701	-0.561701	1.60065	1.5197609346481	-0.561701	1.81545352175167	-0.561701	-0.561701	1.81875099573774	-0.561701	-0.561701	-0.561701	-0.561701	1.67089876287381	-0.561701	-0.561701	1
238	Q3UH66_S1797	Wnk2	-0.405897	-0.405897	-0.405897	-0.405897	-0.405897	-0.405897	-0.405897	-0.405897	-0.405897	-0.405897	-0.405897	-0.405897	-0.405897	-0.405897	-0.405897	-0.405897	2.6774663650861	2.35061507549517	-0.405897	1.87216336545857	4
239	Q3UHQ6_S1167	Dop1b	1.12815013087301	-1.28096	1.16694123118373	-1.28096	0.811609700420959	-1.28096	0.783150547989715	0.682419115847484	0.739405962917574	0.655335030844881	0.145259686276593	0.535583609528364	0.876541243418336	0.709902954721976	0.764432419401248	-0.0320192	-1.28096	-1.28096	-1.28096	-1.28096	1
240	Q3UJB9_S876	Edc4	-1.1256	1.18829	1.47116964301012	1.23317338804287	0.914478962402592	0.501267708863731	0.672788127915532	0.942871775384085	0.851759126389037	-1.1256	0.465017652677463	0.078515027772799	-1.1256	0.0642697848223035	0.621196649935208	-1.1256	-1.1256	-1.1256	-1.1256	-1.1256	1
241	Q3UKC1_S632	Tax1bp1	-0.408708	-0.408708	-0.408708	-0.408708	-0.408708	-0.408708	-0.408708	-0.408708	-0.408708	-0.408708	-0.408708	-0.408708	-0.408708	-0.408708	-0.408708	2.2186734750314	2.19979718576822	-0.408708	-0.408708	2.52955881323525	4
242	Q3UMF0_S1028	Cobll1	-0.557214	-0.557214	-0.557214	-0.557214	-0.557214	-0.557214	2.13848172954618	1.33545906413669	1.75862445751487	-0.557214	1.62829607117177	-0.557214	-0.557214	-0.557214	1.49734191537849	-0.557214	-0.557214	-0.557214	-0.557214	-0.557214	1
243	Q3UMF0_S993	Cobll1	-1.45556	-1.45556	-1.45556	-1.45556	-1.45556	0.558262731640073	0.582837055423688	0.276709660986621	0.514015123810961	0.890449460542786	0.609571884756944	0.93697609699842	-1.45556	0.650484077741789	0.781179268058551	1.08606702221811	0.517998021378906	0.672999661443719	0.556366427866884	0.099423193283937	3
244	Q3UPL0_S520	Sec31a	-0.409363	-0.409363	-0.409363	-0.409363	-0.409363	-0.409363	-0.409363	-0.409363	-0.409363	-0.409363	-0.409363	-0.409363	-0.409363	-0.409363	-0.409363	-0.409363	-0.409363	2.37795659126817	2.32785577954617	2.25335068427187	4
245	Q3UPL0_S526	Sec31a	-0.709689	-0.709689	-0.709689	-0.709689	1.68545931407902	1.21096941463987	1.54121255084051	-0.709689	-0.709689	-0.709689	-0.709689	-0.709689	-0.709689	-0.709689	-0.709689	-0.709689	1.0377535729025	1.29200813036191	1.25602852505819	1.20252312606465	4
246	Q3UYC0_S220	Ppm1h	-1.9456	0.462589855799531	-1.9456	-1.9456	0.211490418954744	0.635058611901088	0.935477007688939	0.973202873237565	0.851232440521905	0.586019436200144	0.692784190192026	0.412592425756193	1.12144260677155	0.531382286285417	0.748867357786331	-0.372695	-0.547863	-0.86625	-0.213705	-0.324815	3
247	Q4VAA2_T205	Cdv3	-0.402754	-0.402754	-0.402754	-0.402754	-0.402754	-0.402754	-0.402754	-0.402754	-0.402754	-0.402754	-0.402754	-0.402754	-0.402754	-0.402754	-0.402754	-0.402754	1.80812727193567	2.14594081602115	2.89275421976064	-0.402754	4
248	Q505F5_S430	Lrrc47	-2.55189	0.30608	-0.196631	-0.423131	-2.55189	0.119952932371837	0.729642455121268	0.885198511088059	0.509239805296452	0.504817243703094	0.366620638557276	0.659681314895818	0.689748430656513	0.886977945251563	1.27194674592697	-0.0557825	-0.44994	-0.241277	-0.212744	-0.24661	3
249	Q52KI8_S227	Srrm1	-0.518321	-0.518321	-0.518321	-0.518321	-0.518321	-0.518321	-0.518321	-0.518321	-0.518321	-0.518321	-0.518321	-0.518321	-0.518321	-0.518321	-0.518321	2.00829940879391	1.18331865319795	1.74670968684252	2.52793059997754	0.3085599821526	4
250	Q569Z6_S253	Thrap3	-1.64234	-1.64234	0.810353984819169	0.570865735553807	-1.64234	-1.64234	0.284472864160125	0.707901330530963	0.543114067798685	0.375392811129299	0.272479409323893	0.518664413674019	-1.64234	0.630359760235451	0.349649755766123	0.599465471166785	-0.030062	0.695889128934219	0.813895015375628	1.06925175260053	2
251	Q569Z6_S679	Thrap3	1.47277206121965	0.457003718013702	1.73115586207692	1.23246545514138	1.31375957295814	-0.918555	-0.918555	-0.918555	-0.918555	-0.918555	0.589724278844759	0.703586893818791	0.242809098375597	0.699112503910513	-0.918555	-0.918555	-0.918555	0.743163516328654	-0.918555	-0.918555	1
252	Q5DU31_S292	Ipcef1	-0.707739	-0.707739	-0.707739	-0.707739	-0.707739	-0.707739	-0.707739	-0.707739	-0.707739	-0.707739	0.966748886218223	1.33601194602599	1.50382688377058	1.16126511343018	-0.707739	-0.707739	-0.707739	1.50632755345492	1.65738549577725	1.0690439394767	2
253	Q5HZI1_S1143	Mtus1	-0.485953	-0.485953	-0.485953	-0.485953	-0.485953	-0.485953	-0.485953	-0.485953	-0.485953	-0.485953	-0.485953	-0.485953	-0.485953	-0.485953	-0.485953	-0.485953	2.11683019207183	2.03572946475886	1.68001399209303	1.94267429856591	4
254	Q5HZI1_T230	Mtus1	-1.46892	0.242288907592275	-1.46892	-1.46892	-1.46892	0.503630485962986	0.56709762829267	0.823585861378578	0.47158790949857	-1.46892	0.499102769121269	0.798574518136784	0.732849176365519	0.559605520119173	0.433789587103934	0.727153451329234	0.625474436931433	0.884951091480742	-1.46892	0.943800099429574	3
255	Q5SF07_S153	Igf2bp2	-0.393932	-1.40242	-2.40863	-0.541858	-2.40863	0.319601332958501	0.230813225621708	0.38002356278104	0.0014300492918301	0.301989288829861	0.695747924072411	0.812224901312074	0.456867777956384	0.718559349133079	0.826101796527194	0.683937376110477	0.599094417732001	-0.267403	0.986175139212129	0.410312666651056	3
256	Q5SF07_S161	Igf2bp2	0.0681546409997481	-2.26094	-2.26094	-0.13401	-2.26094	0.411617811627359	0.484181925148509	0.409656854196982	0.579098507310628	0.176066719059796	0.162337708917617	0.594224826957286	0.525418894748864	0.692367659742629	0.300352799601646	0.587499072122017	0.565415184007923	0.216771305506655	0.809413522276651	0.334250646464976	3
257	Q5SF07_S162	Igf2bp2	-1.03902	-1.03902	-1.03902	-1.03902	-1.03902	-1.03902	0.50107145861931	0.299932628982795	0.38224170064634	-1.03902	-1.03902	0.943608212417964	0.689530014234593	0.802805761228764	-1.03902	1.09369446914284	1.43635494197721	0.797314459214766	1.18975135023008	1.21488118231072	2
258	Q5SF07_S164	Igf2bp2	0.710695645024083	0.743472514854662	0.701403558635542	-1.12994	-1.12994	-1.12994	-1.12994	-1.12994	-1.12994	-1.12994	1.07329405920857	1.18696222808119	1.0050419921292	0.944464833274797	0.894197166762043	-0.0952597	1.14324210340314	-0.0753129	-1.12994	0.807322300244041	2
259	Q5SF07_Y154	Igf2bp2	-1.26222	-0.142498	-1.26222	-1.26222	-1.26222	0.241858111812688	0.444046057651815	-1.26222	-1.26222	0.393059311801671	1.06280800232245	0.596166375476835	0.652839141514387	0.672161299031723	0.633955076500992	1.10061261962697	1.12203879401452	-1.26222	1.20703396177801	0.851465038000925	2
260	Q5SRX1_T473	Tom1l2	-0.851616	-0.851616	-0.851616	-0.851616	-0.851616	-0.851616	-0.851616	-0.851616	0.238132910584172	-0.851616	1.08648864207417	0.841848598049802	-0.851616	0.897560640623859	-0.851616	1.53184361860523	1.01009475724195	1.38018816982741	0.905356294136302	1.47625952941399	2
261	Q5SSL4_S64	Abr	-1.17288	-1.17288	-1.17288	-1.17288	-1.17288	0.306039042444194	-1.17288	-1.17288	0.528399044638722	0.485336557345878	0.869828433028649	0.915511694357275	-1.17288	0.708197965203047	0.828661910457235	0.971662746943131	1.1841290799234	0.823442165280803	0.997199171441565	0.764631981633489	2
262	Q5XFR0_S271	Pabpn1l	-0.558318	-0.558318	-0.558318	-0.558318	-0.558318	-0.558318	-0.558318	-0.558318	-0.558318	-0.558318	-0.558318	-0.558318	-0.558318	-0.558318	-0.558318	1.84813029521063	2.07262213305378	1.49301079387768	1.47868838102811	1.48231807345942	4
263	Q5XFR0_S76	Pabpn1l	-0.680651	-0.680651	-0.680651	-0.680651	-0.680651	-0.680651	-0.680651	-0.680651	-0.680651	-0.680651	-0.680651	0.486860695984708	-0.680651	0.525931200250928	-0.680651	1.62293183750493	1.77515539361955	1.69621534721774	1.51880611433978	1.22255874862192	4
264	Q60520_S861	Sin3a	-0.483374	-0.483374	-0.483374	-0.483374	-0.483374	-0.483374	-0.483374	-0.483374	-0.483374	-0.483374	-0.483374	-0.483374	-0.483374	-0.483374	-0.483374	-0.483374	1.61574843461344	1.70403597561137	2.15910869157461	2.2550957013744	4
265	Q60864_S481	Stip1	-0.605525	-0.605525	-0.605525	-0.605525	-0.605525	-0.605525	-0.605525	-0.605525	-0.605525	-0.605525	-0.605525	-0.605525	0.178740793666791	-0.605525	-0.605525	1.78093369325976	1.59074209835775	1.49843478884216	1.64358061722477	1.78492277079984	4
266	Q60899_S221	Elavl2	-0.562247	-0.562247	-0.562247	-0.562247	-0.562247	1.58083336778787	-0.562247	1.78525254801765	1.68871065269281	1.76605070455128	-0.562247	-0.562247	-0.562247	1.61286348781478	-0.562247	-0.562247	-0.562247	-0.562247	-0.562247	-0.562247	1
267	Q60899_T210	Elavl2	-0.706675	-0.706675	-0.706675	-0.706675	-0.706675	-0.706675	-0.706675	-0.706675	-0.706675	-0.706675	1.4138142815426	1.45001295586739	-0.706675	1.43412637273547	1.72383508384064	-0.706675	1.2098795195295	0.937869350426369	1.01724386362757	-0.706675	2
268	Q60902_T217	Eps15l1	1.49120668748576	-0.777902	1.6457796500154	1.43100577893724	1.20891804986145	-0.777902	1.08762712044111	-0.777902	-0.777902	-0.777902	-0.777902	0.860342893778577	-0.777902	1.00217322951908	-0.777902	-0.777902	-0.777902	0.607775781989521	-0.777902	-0.777902	1
269	Q60949_T466	Tbc1d1	2.57483308814785	2.3672190079768	1.98577156251619	-0.407519	-0.407519	-0.407519	-0.407519	-0.407519	-0.407519	-0.407519	-0.407519	-0.407519	-0.407519	-0.407519	-0.407519	-0.407519	-0.407519	-0.407519	-0.407519	-0.407519	1
270	Q61140_S143	Bcar1	-0.484304	-0.484304	-0.484304	-0.484304	-0.484304	-0.484304	-0.484304	-0.484304	-0.484304	-0.484304	-0.484304	-0.484304	-0.484304	-0.484304	-0.484304	1.80187549645388	2.18746228159038	1.60735155874774	-0.484304	2.15217709388821	4
271	Q61142_S124	Spin1	-0.927133	-0.927133	-0.927133	-0.927133	-0.927133	-0.927133	-0.927133	0.568508572642715	0.441469874872318	0.545246988208217	0.560714002576994	-0.927133	0.454923401990483	-0.927133	-0.927133	1.24470063615763	1.29234245255276	1.5845009975787	1.36686834523564	1.21205910975775	4
272	Q61142_S196	Spin1	-1.75589	-1.75589	-0.39591	-1.75589	-0.510469	0.227972124473955	0.137808581799592	0.132877578131131	-1.75589	0.224393184247013	0.394135128347213	0.48761700650564	0.285347459845193	0.624219765618203	0.512262815522279	0.788913516987606	1.16474824360038	1.1681496596172	1.05518793524463	0.726299894181164	2
273	Q61142_S199	Spin1	-1.41868	-0.360026	-1.41868	-0.246584	-1.41868	0.377994699877596	-1.41868	-0.500722	-0.383613	-0.0715972	0.523075945676093	0.685064741316955	-1.41868	0.793629870742107	0.693384639627616	1.00076866897152	1.25434	1.26177418696356	1.1844812939979	0.881421159072464	2
274	Q61142_S212	Spin1	0.12088829262333	-1.71495	-1.71495	-0.427157	-0.327809	0.217843986274799	-1.71495	-1.71495	-0.504245	0.123668211520349	0.399297332807754	0.514378725718687	0.519069202205736	0.666438974377984	0.557128967465636	1.09988380607014	0.985783944885236	1.2843728781541	0.870852965878398	0.759411789211955	2
275	Q61142_T131	Spin1	-0.561399	-0.561399	-0.561399	-0.561399	-0.561399	-0.561399	-0.561399	-0.561399	-0.561399	-0.561399	-0.561399	-0.561399	-0.561399	-0.561399	-0.561399	1.46347161363063	1.85875238507557	1.76305216204111	1.71223163123972	1.62347480948321	4
276	Q61233_S257	Lcp1	1.1700185824715	0.768407011257686	1.38331993252972	0.826938973394028	-1.27642	0.575156219415005	0.83639959552264	-1.27642	0.526298265463122	-1.27642	0.430689058817202	0.654236089922903	0.483713658371246	0.728136330562399	0.593071885922434	-1.27642	-1.27642	-1.27642	-0.0414542	-1.27642	1
277	Q61233_S5	Lcp1	-0.497633	-0.689533	-1.20241	-3.5854	-0.53136	0.0836184586307522	0.495454398779864	0.37222580963922	0.567058658455631	-0.0807853	0.628283757188723	0.841854057114977	0.171085327696779	0.629260632978771	0.269125972026149	0.452846456600531	0.659874367409263	0.393591566942966	0.677178179119139	0.345663992758436	3
278	Q61316_T531	Hspa4	-1.06719	-1.06719	-1.06719	-1.06719	-1.06719	-1.06719	-1.06719	0.709404079863307	0.871033674807742	-1.06719	1.06278950545022	0.932138256668329	1.07310671022191	0.985345799005989	-1.06719	0.891005256328728	0.844120726524826	0.388558024874487	0.966962525273166	0.880212586758294	2
279	Q61316_T540	Hspa4	-0.87434	-0.87434	-0.87434	-0.87434	-0.87434	0.738130848211069	-0.87434	-0.87434	-0.87434	-0.87434	-0.87434	0.905974077273662	-0.87434	0.953353140211174	0.932576497489098	1.19249662352784	1.37822986479114	1.19443102833646	1.13596578859162	1.18658000398042	2
280	Q61655_S84	Ddx19a	-0.827907	-0.827907	-0.827907	-0.827907	-0.827907	-0.827907	-0.827907	-0.827907	-0.827907	-0.0918308	0.770771415315182	0.776925665892373	0.648594866002654	-0.827907	-0.827907	1.34546003221633	1.48748981046197	1.29629024903326	1.47093452332892	1.40233974848414	4
281	Q61687_T583	Atrx	-0.392036	-0.392036	-0.392036	-0.392036	-0.392036	-0.392036	-0.392036	-0.392036	-0.392036	-0.392036	-0.392036	-0.392036	-0.392036	-0.392036	-0.392036	-0.392036	1.75507771817676	3.2469735012132	1.66255812955863	-0.392036	4
282	Q61699_S537	Hsph1	-0.70244	-0.70244	0.805719710313883	-0.70244	-0.70244	-0.70244	-0.70244	0.863542136044663	-0.70244	-0.70244	-0.70244	-0.70244	1.3347880420856	-0.70244	-0.70244	1.44033662642155	1.4897091998125	1.56176207724674	1.63586587877814	-0.70244	4
283	Q61699_S558	Hsph1	-1.05227	-1.05227	-1.05227	-1.05227	-1.05227	-1.05227	-1.05227	-1.05227	0.622715672423184	-1.05227	1.10989073593862	0.708414111845562	0.976162841290403	0.796933738499632	0.293094104979441	1.12931705792102	1.02654217678359	1.05109717136495	1.24081995771741	0.515410599758238	2
284	Q61699_S810	Hsph1	-2.2426	-2.2426	-0.0651325	-0.17225	-2.2426	0.343952985952707	0.712016046106499	0.607339810069132	0.630585451729428	0.72749609505731	0.552817179106884	0.582272600597356	0.632128140571096	0.599652212637243	0.51853490881058	0.0141267270511053	0.348867405094245	0.261370154536182	0.224863555675428	0.20917442371218	3
285	Q61699_T816	Hsph1	-0.481379	-0.481379	-0.481379	-0.481379	-0.481379	-0.481379	-0.481379	-0.481379	-0.481379	-0.481379	-0.481379	-0.481379	-0.481379	-0.481379	-0.481379	-0.481379	1.81013725218248	1.45739305185174	2.38938635455769	2.04514772830378	4
286	Q61990_S183	Pcbp2	-1.32225	-1.32225	-1.32225	-1.32225	-1.32225	-1.32225	0.618282675578448	0.484860852858338	-1.32225	0.600983144882633	0.655069169663063	0.823567113518166	0.882779912512824	0.885713263128403	0.671000720239283	0.77402640233429	0.713456131172561	0.628147509544477	0.818111776777812	0.699743157551111	3
287	Q62101_S241	Prkd1	-1.46312	-1.46312	-1.46312	-1.46312	0.29235408329142	0.471245604044944	0.871748985163528	0.682098439747792	-1.46312	-1.46312	0.758788814576016	0.737335494936474	0.520896947381093	0.667346085773543	0.580601309454956	0.505993008044946	0.29001463924613	0.576009587774923	0.673479443502751	1.15078227490153	2
288	Q62167_S594	Ddx3x	-0.486163	-0.486163	-0.486163	-0.486163	-0.486163	-0.486163	-0.486163	-0.486163	-0.486163	-0.486163	-0.486163	-0.486163	-0.486163	-0.486163	-0.486163	2.03338896122666	-0.486163	1.8275266735083	1.77222175008916	2.14546873360644	4
289	Q62318_S23	Trim28	-0.405726	-0.405726	-0.405726	-0.405726	-0.405726	-0.405726	-0.405726	-0.405726	-0.405726	-0.405726	-0.405726	-0.405726	-0.405726	-0.405726	-0.405726	-0.405726	2.02207807483278	-0.405726	2.09950814671492	2.77575808543537	4
290	Q62318_S473	Trim28	-0.40716	-0.40716	-0.40716	-0.40716	-0.40716	-0.40716	-0.40716	-0.40716	-0.40716	-0.40716	-0.40716	-0.40716	-0.40716	-0.40716	-0.40716	2.1540950906438	-0.40716	2.6809028793831	-0.40716	2.08671756829124	4
291	Q62318_S479	Trim28	-0.409216	-0.409216	-0.409216	-0.409216	-0.409216	-0.409216	-0.409216	-0.409216	-0.409216	-0.409216	-0.409216	-0.409216	-0.409216	-0.409216	-0.409216	2.43815892551516	2.25084835064185	-0.409216	2.26766060849559	-0.409216	4
292	Q62393_S170	Tpd52	-1.31928	-1.31928	-1.31928	-1.31928	-1.31928	0.765371129012045	-1.31928	0.568488524684352	0.859460990757196	0.609442565383128	0.877581423438097	0.782981061660462	0.533718680991879	0.918721736349596	0.772925480727464	0.701823860432072	0.816624507784405	0.502757173722473	0.525068478630363	-1.31928	3
293	Q62393_S203	Tpd52	-1.31377	-1.31377	-1.31377	-1.31377	-1.31377	0.682474863491024	0.584271762415661	0.708193382113034	-1.31377	0.610983474364074	0.439533495008038	0.880869526055685	1.0234623976787	0.979960174246323	0.822062616110767	0.609168662291266	0.416826546988041	0.675420234949006	0.763145709701852	-1.31377	3
294	Q62393_S30	Tpd52	-0.558655	-0.558655	-0.558655	-0.558655	-0.558655	-0.558655	-0.558655	-0.558655	-0.558655	-0.558655	-0.558655	-0.558655	-0.558655	-0.558655	-0.558655	1.52767331665765	2.03241238339271	1.47374918053957	1.87829398168783	1.46770258391851	4
295	Q62393_T221	Tpd52	-2.67643	-0.13567	-2.67643	-0.248609	-0.380744	0.200973479237356	-0.402049	0.178511652310614	0.442880931880964	0.23038175119912	0.712320597004992	0.639982519479395	0.853319386438647	0.787621066692123	0.699185873662021	0.467551324423314	0.607449409615455	0.557230083812035	0.46018157295092	-0.317652	3
296	Q62393_Y26	Tpd52	0.561844913147471	0.692249176105903	0.434534893359313	0.718510155063942	0.527210533271164	-0.34087	0.338256144407647	0.244477352507668	0.321020618464265	0.307551397366694	-0.242184	-0.381153	-2.15543	-2.15543	-2.15543	0.470335244506072	1.10557952087973	0.40246849694285	0.911612302926553	0.394858493778408	4
297	Q62393_Y28	Tpd52	0.561844913147471	0.692249176105903	0.434534893359313	0.718510155063942	0.527210533271164	-0.34087	0.338256144407647	0.244477352507668	0.321020618464265	0.307551397366694	-0.242184	-0.381153	-2.15543	-2.15543	-2.15543	0.470335244506072	1.10557952087973	0.40246849694285	0.911612302926553	0.394858493778408	4
298	Q62417_T179	Sorbs1	-0.79035	-0.79035	-0.79035	-0.79035	-0.79035	-0.79035	-0.79035	1.03338839957738	-0.79035	1.28565605956262	-0.79035	-0.79035	-0.79035	-0.79035	1.26308999859022	1.27772534983788	1.33358321724724	0.95437867890966	1.42969016841597	0.906688372115491	4
299	Q62448_T505	Eif4g2	-0.876226	-0.876226	-0.876226	-0.876226	-0.876226	-0.876226	-0.876226	-0.876226	1.01098372180101	-0.876226	1.35111183638427	-0.876226	-0.876226	1.03943895046388	1.2607545054325	1.01184761283699	0.988170926505738	0.91898694778853	1.22367665157724	0.833513531616521	2
300	Q63844_T199	Mapk3	-1.66795	-1.66795	-1.66795	-1.66795	-1.66795	0.30345567606593	0.432225921268903	0.274460676609594	0.41759893305577	0.704504647176477	0.921032099040743	0.632612402914658	0.478956170595087	0.774648885324073	0.590525879865489	0.623542688351339	0.728160648372826	0.547362994417858	0.504653983819826	0.405988537144916	3
301	Q63844_T203	Mapk3	-1.66795	-1.66795	-1.66795	-1.66795	-1.66795	0.30345567606593	0.432225921268903	0.274460676609594	0.41759893305577	0.704504647176477	0.921032099040743	0.632612402914658	0.478956170595087	0.774648885324073	0.590525879865489	0.623542688351339	0.728160648372826	0.547362994417858	0.504653983819826	0.405988537144916	3
302	Q64327_S103	Mea1	-0.635154	-0.635154	1.63844199536101	1.46165245650923	1.71133371155632	1.17552449072972	1.46939883013229	-0.635154	-0.635154	1.43580525021369	-0.635154	-0.635154	-0.635154	-0.635154	-0.635154	-0.635154	-0.635154	-0.635154	-0.635154	-0.635154	1
303	Q66JT0_S71	Wee2	-0.561577	-0.561577	-0.561577	-0.561577	-0.561577	-0.561577	-0.561577	-0.561577	-0.561577	-0.561577	-0.561577	-0.561577	-0.561577	-0.561577	-0.561577	1.75891230762925	1.61190380177743	1.89455244434733	1.59885053125795	1.5594289289999	4
304	Q66JT0_T517	Wee2	-0.554689	-0.554689	-0.554689	-0.554689	-0.554689	-0.554689	-0.554689	-0.554689	-0.554689	-0.554689	-0.554689	-0.554689	-0.554689	-0.554689	-0.554689	2.2791049441635	1.44579726763447	1.71178645007048	1.36371682693972	1.51993685225291	4
305	Q6A0A2_S486	Larp4b	2.07131694027683	1.85846274550987	2.25120712239673	-0.48395	-0.48395	-0.48395	-0.48395	-0.48395	-0.48395	-0.48395	-0.48395	1.56221249584524	-0.48395	-0.48395	-0.48395	-0.48395	-0.48395	-0.48395	-0.48395	-0.48395	1
306	Q6A0A2_S490	Larp4b	-0.484633	-0.484633	-0.484633	-0.484633	-0.484633	-0.484633	-0.484633	-0.484633	-0.484633	-0.484633	-0.484633	-0.484633	-0.484633	-0.484633	-0.484633	1.89903743832554	-0.484633	1.58212408292485	2.1782787124214	2.09469142846204	4
307	Q6A0A2_S664	Larp4b	-0.0201334	-3.75151	0.0160349665686375	-0.11409	0.277546239938159	0.643477381421034	0.495424027167398	0.753661818289799	0.841037195806454	0.76062134931552	0.473613604922255	0.456424416634239	0.613738153970421	0.103623435496564	0.621085871158269	-0.599631	-0.238406	-0.674836	-0.447647	-0.21004	1
308	Q6B966_S13	Nlrp14	1.47217084930517	-0.609821	-0.609821	2.22967287743681	1.68891340616934	-0.609821	-0.609821	-0.609821	1.02703695672353	-0.609821	-0.609821	-0.609821	-0.609821	-0.609821	-0.609821	-0.609821	0.559299504768042	-0.609821	-0.609821	1.56040730710904	1
309	Q6B966_S19	Nlrp14	-0.929478	-0.929478	-0.929478	-0.929478	-0.929478	-0.929478	1.70826294595861	-0.929478	0.832254092377874	0.365405378018613	-0.929478	-0.929478	1.05481723120667	-0.929478	0.873693616424875	0.703621991267928	0.611802206074043	0.552712928691713	1.61683653020089	0.975374616324204	2
310	Q6B966_T17	Nlrp14	-0.482443	-0.482443	-0.482443	-0.482443	-0.482443	-0.482443	-0.482443	-0.482443	-0.482443	-0.482443	-0.482443	-0.482443	-0.482443	-0.482443	-0.482443	2.25893598732793	1.50798996264275	1.76470392510203	-0.482443	2.18745840848807	4
311	Q6B966_T3	Nlrp14	-0.484117	-0.484117	-0.484117	-0.484117	-0.484117	-0.484117	-0.484117	-0.484117	-0.484117	-0.484117	-0.484117	-0.484117	-0.484117	-0.484117	-0.484117	2.02755330220359	2.27861006033603	-0.484117	1.84487243435138	1.59483588344282	4
312	Q6B966_Y10	Nlrp14	-1.18797	-1.18797	-1.18797	-1.18797	-1.18797	0.816432806496524	0.922482678144378	0.94512398582997	-1.18797	0.782322230280451	-1.18797	0.881896540220979	-1.18797	0.80686117423764	0.777450653136638	0.631004800967825	0.815373219231581	0.661980664913799	0.934775084570463	0.528036144042488	3
313	Q6NZC7_S600	Sec23ip	-0.554579	-0.554579	-0.554579	-0.554579	-0.554579	-0.554579	-0.554579	-0.554579	-0.554579	-0.554579	-0.554579	-0.554579	-0.554579	-0.554579	-0.554579	2.02676152681063	1.71497250335882	1.29223040007832	1.27279341955022	2.01193215000785	4
314	Q6NZJ6_S1211	Eif4g1	-0.405406	-0.405406	-0.405406	-0.405406	-0.405406	-0.405406	-0.405406	-0.405406	-0.405406	-0.405406	-0.405406	-0.405406	-0.405406	-0.405406	-0.405406	-0.405406	1.83229652886138	2.37348152774435	-0.405406	2.68612307105759	4
315	Q6NZJ6_T1226	Eif4g1	-0.486517	-0.486517	-0.486517	-0.486517	-0.486517	-0.486517	-0.486517	-0.486517	-0.486517	2.15601151562322	1.93435695150553	-0.486517	1.83607848503011	1.85782478261999	-0.486517	-0.486517	-0.486517	-0.486517	-0.486517	-0.486517	1
316	Q6P1G2_S26	Kdm2b	-0.819301	-0.819301	-0.819301	-0.819301	-0.819301	-0.819301	-0.819301	0.747038183303233	1.23321807145789	-0.819301	1.56086752694221	0.310714542831169	1.83001517041875	1.37411258134103	1.0265510351771	-0.819301	0.839900404724657	0.0898930967818973	-0.819301	-0.819301	3
317	Q6P1G2_S566	Kdm2b	-0.557914	-0.557914	-0.557914	-0.557914	-0.557914	-0.557914	-0.557914	-0.557914	-0.557914	-0.557914	-0.557914	-0.557914	-0.557914	-0.557914	-0.557914	1.43510998086963	1.40689110345678	1.58020619189719	1.91158895966325	2.03491343780698	4
318	Q6P1G2_S885	Kdm2b	-0.63604	-0.63604	-0.63604	-0.63604	-0.63604	-0.63604	-0.63604	-0.63604	-0.63604	-0.63604	-0.63604	-0.63604	-0.63604	1.24118621619773	-0.63604	1.51687329977481	1.44394297714861	1.43481106383204	1.71184	1.55590386177387	4
319	Q6P1G2_S997	Kdm2b	-0.479793	-0.479793	-0.479793	-0.479793	-0.479793	-0.479793	-0.479793	-0.479793	-0.479793	-0.479793	-0.479793	-0.479793	-0.479793	-0.479793	-0.479793	1.59829383558556	1.80724987675573	2.56843396222196	-0.479793	1.70271217236723	4
320	Q6P1H6_S535	Ankle2	-1.40423	-1.40423	-1.40423	-1.40423	-1.40423	0.725687440758187	1.1038203549608	0.916887919758106	0.900035839655686	0.951587516484539	0.019910863589856	0.757009218529942	0.881422315212264	0.83693327477384	0.863951003314667	0.017838531753931	-1.40423	0.175132433611273	0.110417145298131	0.164734693279745	3
321	Q6P542_S107	Abcf1	-0.792179	1.33283708734037	-0.792179	1.32836331333512	1.39521696444134	-0.792179	-0.792179	-0.792179	-0.792179	-0.792179	-0.792179	1.02362555103527	1.08653069656014	1.08003338390885	1.26056072948092	-0.792179	0.998977409279914	-0.792179	-0.792179	-0.792179	1
322	Q6P542_T21	Abcf1	-0.48573	-0.48573	-0.48573	-0.48573	-0.48573	-0.48573	-0.48573	-0.48573	-0.48573	-0.48573	-0.48573	-0.48573	-0.48573	-0.48573	-0.48573	1.73589700599599	-0.48573	2.15772292483058	1.80437113757248	2.07369171556832	4
323	Q6P9Q6_S1091	Fkbp15	-0.40912	-0.40912	-0.40912	-0.40912	-0.40912	-0.40912	-0.40912	-0.40912	-0.40912	-0.40912	-0.40912	-0.40912	-0.40912	-0.40912	-0.40912	2.46032288719305	2.23956775051192	-0.40912	-0.40912	2.25514991977639	4
324	Q6P9Q6_T1093	Fkbp15	-0.40912	-0.40912	-0.40912	-0.40912	-0.40912	-0.40912	-0.40912	-0.40912	-0.40912	-0.40912	-0.40912	-0.40912	-0.40912	-0.40912	-0.40912	2.46032288719305	2.23956775051192	-0.40912	-0.40912	2.25514991977639	4
325	Q6PCP5_T89	Mff	-1.52092	0.938354899758126	-1.52092	0.996119603405682	0.761129788564343	0.966096368674033	0.883250084943948	0.820549335346819	1.13759563888252	0.864296901237398	0.240740368703333	-1.52092	-1.52092	0.486399269859411	0.147455282136641	-0.452939	-0.132282	-0.108776	0.0566251583386124	-1.52092	1
326	Q6PFD9_T670	Nup98	-1.15101	-1.15101	-1.15101	-1.15101	-1.15101	0.502941537045322	-1.15101	0.233896102643355	-1.15101	-1.15101	0.843920179783567	0.647759719807661	0.580532263101777	0.647259597518214	0.235491659972463	1.01502211194997	1.02809900630379	1.03504131236858	1.31832719089638	1.11980135135942	2
327	Q6PGH2_S16	Jpt2	-0.964609	-0.964609	-0.964609	-0.964609	-0.964609	-0.964609	0.848685828259499	-0.964609	0.662157	-0.964609	0.965459331079638	0.800975315311259	-0.964609	-0.964609	0.916807600490495	1.12423786928233	0.937479885741894	1.21790115390861	1.34761241638444	0.824771111908392	2
328	Q6PGH2_S30	Jpt2	-0.786583	-0.786583	-0.786583	-0.786583	-0.786583	-0.786583	-0.786583	-0.786583	-0.786583	0.826807321496019	-0.786583	0.876713390059585	-0.786583	1.15024909332784	-0.786583	1.14390098134229	1.34095618386475	1.26948503254523	1.60896743586919	1.22192030420571	4
329	Q6PGH2_S69	Jpt2	-1.3184	-1.3184	-1.3184	-1.3184	-1.3184	-1.3184	0.624592021535815	0.747869637184269	0.705906769003412	0.389676845909742	0.767062779033111	0.811209082706671	0.867400221085247	0.479665977204477	0.704617239242354	0.821457471551443	0.696487755403665	-1.3184	0.960275748116529	0.652554157390789	3
330	Q6PGH2_S75	Jpt2	-1.06965	-1.06965	-1.06965	-1.06965	-1.06965	0.545831347509013	0.806364325858054	-1.06965	0.884876361940525	-1.06965	0.943924480709203	-1.06965	-1.06965	0.666433511630708	0.883631278972396	0.996444327289259	0.87578199765071	1.05976120638525	1.13047789288482	0.833362678402449	2
331	Q6PGH2_S97	Jpt2	-1.29893	-1.29893	-1.29893	-1.29893	-1.29893	0.800622257305193	0.856017148630552	0.211476268450435	-1.29893	0.81751757846651	0.996334747192797	0.78429796993145	0.648898495497634	0.338213703461174	0.890015684653293	0.274520920449823	1.00818167352162	0.722959569545273	0.743470903890681	-1.29893	3
332	Q6PGH2_T91	Jpt2	-0.340782	-2.12135	-0.478835	-2.12135	-2.12135	0.699294433493455	0.653365612990622	0.425635157127907	0.557784658174561	0.721992426660259	0.71181577196662	0.677554295462187	0.259932553595453	0.718816032121193	0.700384628011839	0.353468032841504	0.73920517177524	0.34485958681857	0.210736305968466	-0.591181	3
333	Q6PGL7_S1152	Washc2	-0.873285	-0.873285	1.23383795160619	-0.873285	-0.873285	1.0571903648952	1.29833194995919	1.06580089871655	1.28997179531624	1.0362003484466	-0.873285	-0.873285	1.06779875268482	0.606114909131946	0.950889545487567	-0.873285	-0.873285	-0.873285	-0.873285	-0.873285	1
334	Q6RHR9_S930	Magi1	-0.554217	-0.554217	-0.554217	-0.554217	-0.554217	-0.554217	-0.554217	-0.554217	-0.554217	-0.554217	-0.554217	-0.554217	-0.554217	-0.554217	-0.554217	1.9473	1.94190050473276	1.83826281704877	1.52455940559093	1.06122554211762	4
335	Q6RT24_S2414	Cenpe	-0.405378	-0.405378	-0.405378	-0.405378	-0.405378	-0.405378	-0.405378	-0.405378	-0.405378	-0.405378	-0.405378	-0.405378	-0.405378	-0.405378	-0.405378	2.35684520042127	2.69768133507031	1.83689143335623	-0.405378	-0.405378	4
336	Q78ZA7_S121	Nap1l4	-0.559902	-0.559902	-0.559902	-0.559902	-0.559902	-0.559902	-0.559902	-0.559902	-0.559902	-0.559902	-0.559902	-0.559902	-0.559902	-0.559902	-0.559902	1.7474995307416	1.95698163753606	1.70209150849644	1.63932969173385	1.3526264982734	4
337	Q78ZA7_S125	Nap1l4	-0.559936	-0.559936	-0.559936	-0.559936	-0.559936	-0.559936	-0.559936	-0.559936	-0.559936	-0.559936	-0.559936	-0.559936	-0.559936	-0.559936	-0.559936	1.70623231338177	1.96399276810041	1.72541410407458	1.64545168432459	1.3579459813885	4
338	Q78ZA7_S49	Nap1l4	-1.63281	-1.63281	-1.63281	-0.558844	-0.107602	-0.790883	0.438797747536566	-0.366063	0.231404156970521	0.14883389517467	0.706897250626094	0.663877616121301	-1.63281	0.826731346511777	0.345128796769668	0.883217688567857	1.09823219305796	1.26045751396609	1.13340668606727	0.61765242862938	2
339	Q78ZA7_S7	Nap1l4	-0.793891	-0.793891	-0.793891	-0.793891	-0.793891	1.0739417932818	-0.793891	1.16855454540824	-0.793891	-0.793891	-0.793891	-0.793891	-0.793891	1.30803726770391	1.14286047090215	1.1799361168972	1.29244595502908	-0.793891	1.34055800376431	1.02035537402541	2
340	Q78ZA7_T111	Nap1l4	-0.553923	-0.553923	-0.553923	-0.553923	-0.553923	-0.553923	-0.553923	-0.553923	-0.553923	-0.553923	-0.553923	-0.553923	-0.553923	-0.553923	-0.553923	1.87519953160726	2.04907555491347	1.07264869444996	1.81004832816012	1.50186885001457	4
341	Q78ZA7_T117	Nap1l4	-0.408981	-0.408981	-0.408981	-0.408981	-0.408981	-0.408981	-0.408981	-0.408981	-0.408981	-0.408981	-0.408981	-0.408981	-0.408981	-0.408981	-0.408981	2.46029	-0.408981	-0.408981	2.32577564025333	2.16662093890483	4
342	Q78ZA7_T51	Nap1l4	-0.409373	-0.409373	-0.409373	-0.409373	-0.409373	-0.409373	-0.409373	-0.409373	-0.409373	-0.409373	-0.409373	-0.409373	-0.409373	-0.409373	-0.409373	-0.409373	2.30738039948947	2.3836186732196	2.26834497287687	-0.409373	4
343	Q7TMY8_S1903	Huwe1	1.16412573969539	0.978817489507186	1.27345634955873	0.749746976562564	-2.31103	0.161964825595756	0.444086727687789	0.621321707860326	0.366741320949252	0.371770140661021	0.0134658264802692	0.179181619636653	0.632124659325715	-0.00225422	0.0599024066197522	-0.267661	-1.49325	-0.279104	-0.352368	-2.31103	1
344	Q7TN29_S216	Smap2	-0.561224	-0.561224	-0.561224	-0.561224	-0.561224	-0.561224	-0.561224	-0.561224	-0.561224	-0.561224	-0.561224	1.94547443215088	-0.561224	1.71296672566901	-0.561224	-0.561224	1.60095015312171	1.62252671183035	1.53644204520506	-0.561224	2
345	Q7TN29_S224	Smap2	-0.408936	-0.408936	-0.408936	-0.408936	-0.408936	-0.408936	-0.408936	-0.408936	-0.408936	-0.408936	-0.408936	-0.408936	-0.408936	-0.408936	-0.408936	2.17511764714813	2.29601401265758	2.4807846127242	-0.408936	-0.408936	4
346	Q7TPS5_T291	C2cd5	-0.615525	-0.615525	-0.615525	-0.615525	-0.615525	-0.615525	-0.615525	-0.615525	-0.615525	-0.615525	-0.615525	-0.615525	-0.615525	-0.615525	0.413157413945104	1.58900563022735	1.47447898523883	1.78893392686444	1.61043549144551	1.74134542608572	4
347	Q7TPW1_S16	Nexn	0.865621130686464	0.991081996193406	0.850380708208354	0.862769444934284	0.765349957030105	0.549946308539004	0.636011214409979	0.681015953487082	0.620670747929003	0.480358577457653	0.427789304888928	-1.46124	0.517481923886348	0.385403364093494	0.133549311613015	-1.46124	-1.46124	-1.46124	-1.46124	-1.46124	1
348	Q7TPW1_S296	Nexn	-0.847655	1.54302436304318	1.47467354188963	-0.847655	1.3697195087437	-0.847655	-0.847655	-0.847655	-0.847655	-0.847655	1.00296023056716	-0.847655	1.31349938205217	-0.847655	-0.847655	0.268190494687185	-0.847655	0.681885250640158	0.80697369774736	0.863282440906262	2
349	Q7TPW1_S434	Nexn	-0.784832	-0.784832	-0.784832	-0.784832	-0.784832	-0.784832	-0.784832	-0.784832	-0.784832	1.25415670052863	1.65729100432041	1.13934640600247	1.21986060700199	1.27168429367795	-0.784832	-0.784832	-0.784832	1.24533092313998	0.868983265722246	0.76132614032009	2
350	Q7TPW1_T294	Nexn	1.08843783917228	1.35340592521943	0.971020898313374	-0.316285	-1.84709	0.801104494502137	1.30863	0.923926428931679	0.880069548984089	0.454141433141088	-0.449358	-0.529489	0.485708536314421	0.161659047648127	0.142784314063071	-0.927742	-1.54091	-1.41615	-1.03949	-0.504381	1
351	Q7TQH0_S109	Atxn2l	-0.556244	-0.556244	-0.556244	-0.556244	-0.556244	-0.556244	-0.556244	-0.556244	-0.556244	-0.556244	-0.556244	-0.556244	-0.556244	-0.556244	-0.556244	1.73188598041014	1.78119505764855	1.09114116011134	1.91736322520686	1.82206990377621	4
352	Q7TQH0_S560	Atxn2l	-0.626135	-0.626135	-0.626135	-0.626135	-0.626135	-0.626135	-0.626135	-0.626135	-0.626135	-0.626135	-0.626135	-0.626135	0.751723631960856	-0.626135	-0.626135	1.68072932519253	1.76243765618174	1.49880562239289	1.69362741448257	1.37856789514038	4
353	Q7TQH0_T591	Atxn2l	-0.486134	-0.486134	-0.486134	-0.486134	-0.486134	-0.486134	-0.486134	-0.486134	-0.486134	-0.486134	-0.486134	-0.486134	-0.486134	-0.486134	-0.486134	1.86307950366364	1.73355538388751	-0.486134	2.09143128990237	2.09007589996386	4
354	Q7TSC1_S1145	Prrc2a	-1.06245	-1.06245	-1.06245	-1.06245	-1.06245	0.806706890851918	1.03060740695116	0.905642774036022	1.14964872023133	0.92017373348377	0.924587919109551	-1.06245	0.94933720527544	1.03942504890886	0.953783835876474	0.395743356717531	-1.06245	0.48635068295748	-1.06245	-1.06245	1
355	Q7TSI3_S738	Ppp6r1	-0.549316	-0.549316	-0.549316	-0.549316	-0.549316	-0.549316	-0.549316	-0.549316	-0.549316	-0.549316	-0.549316	-0.549316	-0.549316	-0.549316	-0.549316	2.20156199793594	2.00408207055324	0.999877737651638	1.45566354878784	1.57855750729544	4
356	Q7TSI3_S739	Ppp6r1	-0.549316	-0.549316	-0.549316	-0.549316	-0.549316	-0.549316	-0.549316	-0.549316	-0.549316	-0.549316	-0.549316	-0.549316	-0.549316	-0.549316	-0.549316	2.20156199793594	2.00408207055324	0.999877737651638	1.45566354878784	1.57855750729544	4
357	Q80U62_S655	Rubcn	-0.54327	-0.54327	-0.54327	-0.54327	-0.54327	-0.54327	-0.54327	-0.54327	-0.54327	-0.54327	-0.54327	1.05960454308122	1.4762849861772	1.18116127747289	-0.54327	2.38066863121991	-0.54327	2.05133138847608	-0.54327	-0.54327	2
358	Q80VC9_S812	Camsap3	-0.877935	-0.877935	-0.877935	-0.877935	-0.877935	-0.877935	-0.877935	-0.877935	-0.877935	-0.877935	-0.877935	0.969060806732277	0.937488693411568	0.946374291536109	0.979495343787629	1.19533827846164	1.35043945822164	1.0089396277832	1.10979891668605	1.16034660881924	2
359	Q80VC9_T797	Camsap3	-0.872908	-0.872908	-0.872908	-0.872908	-0.872908	1.17054690836668	1.1928928439214	0.72966229244578	1.02278464148001	1.26141311654235	1.27604433691626	1.12975	-0.872908	1.12931936581366	0.689576786297669	-0.872908	-0.872908	-0.872908	-0.872908	-0.872908	1
360	Q80W85_S184	Npm2	-0.215797	-0.196276	-0.659222	-0.433203	-2.90835	-0.0806332	-0.378032	-0.193009	-0.443462	-1.12929	-0.00146831	-0.144234	0.546473945669951	0.337702013920059	-0.213646	1.00227040128946	0.952662309779656	1.29234383396898	1.50167166399974	1.36350217739215	2
361	Q80W85_S189	Npm2	-0.561136	-0.561136	-0.561136	-0.561136	-0.561136	-0.561136	-0.561136	-0.561136	-0.561136	-0.561136	-0.561136	-0.561136	-0.561136	-0.561136	-0.561136	1.7911489728514	1.83824101434944	1.64523749868728	1.72182614536714	1.42058481447918	4
362	Q80W85_S5	Npm2	-0.742361	-0.742361	-0.742361	-0.742361	1.43492991120705	-0.742361	-0.742361	-0.742361	-0.742361	1.31318627939155	1.54713165416646	-0.742361	-0.742361	-0.742361	-0.742361	0.953264788876032	-0.0559656	0.852427437483997	0.945980621420021	1.91737905097056	4
363	Q80W85_T179	Npm2	0.118315243402407	-0.662737	-0.678807	-0.606672	-0.181744	-3.0794	-0.0761285	-0.115501	-0.833582	-0.421443	0.235247991761033	0.0930468540363526	0.189056567831403	0.287377850040441	-0.16553	0.98170767714544	0.968521618873666	1.28294367768768	1.30848614806313	1.35684032716708	4
364	Q80W85_T6	Npm2	-0.659907	-0.659907	-0.659907	-0.659907	1.62741000682636	-0.659907	-0.659907	-0.659907	-0.659907	-0.659907	1.74528167149457	-0.659907	-0.659907	-0.659907	-0.659907	1.12140476765361	0.0611746239607705	0.780630480405826	1.11375250734895	2.12913346856939	4
365	Q80WQ2_T11	Vac14	-0.40486	-0.40486	-0.40486	-0.40486	-0.40486	-0.40486	-0.40486	-0.40486	-0.40486	-0.40486	-0.40486	1.8845444580071	-0.40486	2.79198830709806	2.20608245839699	-0.40486	-0.40486	-0.40486	-0.40486	-0.40486	1
366	Q80X90_S885	Flnb	-0.627221	-0.627221	-0.627221	-0.627221	-0.627221	-0.627221	-0.627221	-0.627221	-0.627221	-0.627221	-0.627221	-0.627221	-0.627221	0.943055655602403	-0.627221	1.59255922600485	1.91314595933178	1.59091216154721	1.61349814896632	1.12792267359587	4
367	Q80X90_S932	Flnb	-0.55483	-0.55483	-0.55483	-0.55483	-0.55483	-0.55483	-0.55483	-0.55483	-0.55483	-0.55483	-0.55483	-0.55483	1.03523553152629	-0.55483	-0.55483	1.7753583040401	1.94227838312617	1.87264060374115	1.6969419338465	-0.55483	4
368	Q80X90_S983	Flnb	-0.551849	-0.551849	-0.551849	-0.551849	-0.551849	-0.551849	-0.551849	-0.551849	-0.551849	-0.551849	-0.551849	1.37270335064267	-0.551849	-0.551849	-0.551849	1.86439060044946	-0.551849	1.36036700562617	2.31388575541112	1.36638588612084	4
369	Q80XU3_S113	Nucks1	-0.407751	-0.407751	-0.407751	-0.407751	-0.407751	-0.407751	-0.407751	-0.407751	-0.407751	-0.407751	2.2315830077154	2.07830933373996	-0.407751	2.62187563916557	-0.407751	-0.407751	-0.407751	-0.407751	-0.407751	-0.407751	1
370	Q80XU3_S181	Nucks1	-0.635117	-0.635117	-0.635117	-0.635117	-0.635117	-0.635117	-0.635117	-0.635117	1.21656512587252	-0.635117	-0.635117	1.29675397507788	-0.635117	-0.635117	-0.635117	1.55554165536368	1.57528313281958	-0.635117	1.53203286336387	1.7154632033517	4
371	Q80XU3_T179	Nucks1	-0.635117	-0.635117	-0.635117	-0.635117	-0.635117	-0.635117	-0.635117	-0.635117	1.21656512587252	-0.635117	-0.635117	1.29675397507788	-0.635117	-0.635117	-0.635117	1.55554165536368	1.57528313281958	-0.635117	1.53203286336387	1.7154632033517	4
372	Q80XU3_Y13	Nucks1	-0.483314	-0.483314	-0.483314	-0.483314	-0.483314	-0.483314	-0.483314	-0.483314	-0.483314	-0.483314	-0.483314	-0.483314	-0.483314	-0.483314	-0.483314	2.03748090856408	1.9371938679188	1.49452568752808	2.26381783386916	-0.483314	4
373	Q80XU3_Y26	Nucks1	-0.476434	-0.476434	-0.476434	-0.476434	-0.476434	-0.476434	-0.476434	-0.476434	-0.476434	-0.476434	-0.476434	-0.476434	-0.476434	-0.476434	-0.476434	-0.476434	2.57162080431535	2.01418523077458	1.31135877431414	1.72578349162406	4
374	Q80Y81_S797	Elac2	-0.559575	-0.559575	-0.559575	-0.559575	-0.559575	-0.559575	-0.559575	-0.559575	-0.559575	-0.559575	-0.559575	-0.559575	-0.559575	-0.559575	-0.559575	1.4969033569826	1.9582078415308	1.51306729819307	1.90198914526406	1.52345303753223	4
375	Q80ZX8_S739	Spag1	-1.85936	-1.85936	-1.85936	0.558427309602292	-1.85936	-0.204374	0.487615483577433	0.2396198386605	0.172634846298124	0.287867934096071	0.23223934220651	0.226503344816777	0.412687837323805	0.338286177125427	0.37848995364587	0.958377023013334	1.16702305685653	0.703422945544542	0.802299066251369	0.67633668189156	3
376	Q80ZX8_S740	Spag1	-1.85936	-1.85936	-1.85936	0.558427309602292	-1.85936	-0.204374	0.487615483577433	0.2396198386605	0.172634846298124	0.287867934096071	0.23223934220651	0.226503344816777	0.412687837323805	0.338286177125427	0.37848995364587	0.958377023013334	1.16702305685653	0.703422945544542	0.802299066251369	0.67633668189156	3
377	Q8BGD9_S445	Eif4b	-0.407882	-0.407882	-0.407882	-0.407882	-0.407882	-0.407882	-0.407882	-0.407882	-0.407882	-0.407882	-0.407882	-0.407882	-0.407882	-0.407882	-0.407882	2.03364416660992	-0.407882	-0.407882	2.32915748463162	2.57119828690139	4
378	Q8BGD9_T450	Eif4b	-0.408591	-0.408591	-0.408591	-0.408591	-0.408591	-0.408591	-0.408591	-0.408591	-0.408591	-0.408591	-0.408591	-0.408591	-0.408591	-0.408591	-0.408591	-0.408591	-0.408591	2.13108435469267	2.2882402739246	2.52672538471364	4
379	Q8BHL8_S153	Psmf1	-3.83418	0.328886291206575	1.12707407085181	0.623109897607585	0.378420033731176	-0.114468	0.033260580534128	-0.322837	-0.0782466	-0.0311786	0.473403327204506	0.702081017336471	0.823137924589629	0.196971682290623	0.329122150505523	-0.411292	-0.496517	-0.211379	0.510700438922168	-0.0260647	1
380	Q8BHL8_T162	Psmf1	0.926640782537106	0.541620942325143	1.20354584902215	0.956860838153331	0.917369636810436	0.463416123451739	0.742164669900595	0.443689137580758	-1.51827	-1.51827	-0.435539	0.670592154356871	0.147153644667028	0.731077274298618	0.874710659285861	-1.51827	-1.51827	-1.51827	-0.391872	-0.200105	1
381	Q8BIJ7_S48	Rufy1	-1.67785	-1.67785	-1.67785	-1.67785	-1.67785	0.378758864750725	0.447687096747722	0.382060698148609	0.430619957175199	0.38339516542622	0.564205262765893	0.623642816049386	0.67719214178376	0.50264908863053	0.660554165937525	0.692633208096866	0.710933321197686	0.741185802073814	0.597150173570986	0.596573885768904	3
382	Q8BIJ7_S52	Rufy1	-1.7871	-1.11802	-1.7871	-1.7871	-1.7871	0.318283141902151	0.525176756597798	0.380021565620933	0.357531099392134	0.191364448186008	0.630401105494397	0.677769188060133	0.611255238254954	0.482589199584138	0.584093238994137	0.706759150433115	0.785182841587625	0.757838871864473	0.666296870887962	0.591877513378881	3
383	Q8BIL5_S235	Hook1	-0.405668	-0.405668	-0.405668	-0.405668	-0.405668	-0.405668	-0.405668	-0.405668	-0.405668	-0.405668	-0.405668	-0.405668	-0.405668	-0.405668	-0.405668	2.02398815949707	-0.405668	2.09275421130273	2.77960874232016	-0.405668	4
384	Q8BJ05_S515	Zc3h14	-0.405167	-0.405167	-0.405167	-0.405167	-0.405167	-0.405167	-0.405167	-0.405167	-0.405167	-0.405167	-0.405167	-0.405167	-0.405167	-0.405167	-0.405167	2.78114595318877	1.90830770641257	-0.405167	-0.405167	2.19837875625399	4
385	Q8BJL1_S383	Fbxo30	-0.402716	-0.402716	-0.402716	-0.402716	-0.402716	-0.402716	-0.402716	-0.402716	-0.402716	-0.402716	-0.402716	-0.402716	-0.402716	-0.402716	-0.402716	-0.402716	2.69641346699454	-0.402716	2.50034680237618	1.64941129755877	4
386	Q8BMG7_S448	Rab3gap2	-0.856537	-0.856537	-0.856537	-0.856537	-0.856537	-0.856537	-0.856537	0.607055945169009	-0.856537	-0.856537	0.71960476330288	-0.856537	1.14321745683996	0.730116289015395	0.739718911340515	1.54664480171584	-0.856537	1.11233147065744	1.55574407764116	1.26747810684952	2
387	Q8BP27_S67	Sfr1	1.79001273761695	1.07961367954812	-0.130394	-0.717614	0.258071770034611	0.710641393813417	-1.24548	0.906257894495545	1.91189622673858	-0.105644	-1.14191	-0.546836	-0.498628	-0.0167939	-1.16997	0.193740476980115	-0.721063	1.34730493813377	-1.15549	-0.747705	1
388	Q8BP27_S71	Sfr1	-0.559013	-0.559013	-0.559013	-0.559013	-0.559013	1.29259111626843	-0.559013	-0.559013	-0.559013	-0.559013	1.6481067513448	-0.559013	-0.559013	-0.559013	-0.559013	1.87518701260693	-0.559013	1.92471582342654	1.64458785167967	-0.559013	2
389	Q8BP27_T129	Sfr1	-0.400039	-0.400039	-0.400039	-0.400039	-0.400039	-0.400039	-0.400039	-0.400039	-0.400039	-0.400039	-0.400039	-0.400039	-0.400039	-0.400039	-0.400039	-0.400039	1.52643223014729	2.7798466772428	-0.400039	2.49437971703107	4
390	Q8BRF7_S294	Scfd1	-0.153161	-0.559501	0.251027045300227	-2.81735	-2.81735	0.240967639837213	0.552970921418641	0.334029753025429	0.364865604976922	0.432158862669801	0.399616240158754	0.48489848324084	0.521734952937314	0.49271836019044	0.431880415886468	0.504567678033545	0.250599124109634	0.633712737373769	0.145162789583869	0.30644718039739	3
391	Q8BRN9_T499	Cc2d1b	-1.25092	-1.25092	-1.25092	-1.25092	-1.25092	0.97789264212688	0.500493692495952	0.432843688324756	0.986279018626423	-0.285291	0.67002841878177	0.963288625871433	-1.25092	0.451317793202789	1.31726919195416	0.32665089329109	1.08704864494486	0.900432343669519	0.428153061990293	-1.25092	3
392	Q8BS90_S47	Bora	-0.54821	-0.54821	-0.54821	-0.54821	-0.54821	-0.54821	-0.54821	-0.54821	-0.54821	-0.54821	-0.54821	-0.54821	-0.54821	-0.54821	-0.54821	1.40141030509265	2.50238475719002	1.60188819206893	1.29648713903669	1.42097932687211	4
393	Q8BS90_T48	Bora	-0.54821	-0.54821	-0.54821	-0.54821	-0.54821	-0.54821	-0.54821	-0.54821	-0.54821	-0.54821	-0.54821	-0.54821	-0.54821	-0.54821	-0.54821	1.40141030509265	2.50238475719002	1.60188819206893	1.29648713903669	1.42097932687211	4
[truncated: 285 more rows]

## Sheet: quantification data
	Index	Gene	GV_1.Intensity	GV_2.Intensity	GV_3.Intensity	GV_4.Intensity	GV_5.Intensity	GVBD_1.Intensity	GVBD_2.Intensity	GVBD_3.Intensity	GVBD_4.Intensity	GVBD_5.Intensity	MI_1.Intensity	MI_2.Intensity	MI_3.Intensity	MI_4.Intensity	MI_5.Intensity	X2_1_8.Intensity	X2_2_9.Intensity	X2_3.Intensity	X05_3_3.Intensity	X1_3_6.Intensity	GV_1	GV_2	GV_3	GV_4	GV_5	GVBD_1	GVBD_2	GVBD_3	GVBD_4	GVBD_5	MI_1	MI_2	MI_3	MI_4	MI_5	MII_1	MII_2	MII_3	MII_4	MII_5
[truncated: 913 more rows]
