# Supplementary material for: Unlocking Ultrasensitive Phosphoproteomics of Nanoscale Samples: A Rapid IMAC Enrichment Platform Using Ti-PAN Tip
Source: Research Square preprint supplement (doi:10.21203/rs.3.rs-8623740/v1), 2026-01-28
Supplement: Supplementary file 10 [file aada035c85a8aa2d320b38b7.xlsx]

## Sheet: 10000cells_1_MSFragger
Peptide Sequence	Modified Sequence	Prev AA	Next AA	Start	End	Peptide Length	Charges	Assigned Modifications	Protein	Protein ID	Entry Name	Gene	Protein Description	Mapped Genes	Mapped Proteins	cell4_2 Spectral Count	cell4_2 Intensity	cell4_2 Match Type	cell4_2 Localization
AAAAAATAPPSPGPAQPGPR	AAAAAATAPPS[79.9663]PGPAQPGPR	R	A	151	170	20	2	11S(79.9663)	sp|Q6SPF0|SAMD1_HUMAN	Q6SPF0	SAMD1_HUMAN	SAMD1	Sterile alpha motif domain-containing protein 1			1	0	MS/MS	STY:79.9663@AAAAAAT(0.1915)APPS(0.8085)PGPAQPGPR;
AAAAAPASEDEDDEDDEDDEDDDDDEEDDSEEEAMETTPAK	AAAAAPASEDEDDEDDEDDEDDDDDEEDDS[79.9663]EEEAMET[79.9663]TPAK	K	G	177	217	41	4	30S(79.9663),37T(79.9663)	sp|P19338|NUCL_HUMAN	P19338	NUCL_HUMAN	NCL	Nucleolin			3	6.0003408E7	MS/MS	STY:79.9663@AAAAAPAS(0.2726)EDEDDEDDEDDEDDDDDEEDDS(0.5758)EEEAMET(0.5758)T(0.5758)PAK;
AAAAAPASEDEDDEDDEDDEDDDDDEEDDSEEEAMETTPAK	AAAAAPASEDEDDEDDEDDEDDDDDEEDDS[79.9663]EEEAM[15.9949]ET[79.9663]TPAK	K	G	177	217	41	4	30S(79.9663),35M(15.9949),37T(79.9663)	sp|P19338|NUCL_HUMAN	P19338	NUCL_HUMAN	NCL	Nucleolin			1	0	MS/MS	STY:79.9663@AAAAAPAS(0.1437)EDEDDEDDEDDEDDDDDEEDDS(0.8880)EEEAMET(0.8880)T(0.0803)PAK;M:15.9949@AAAAAPASEDEDDEDDEDDEDDDDDEEDDSEEEAM(1.0000)ETTPAK;
AAAAAPASEDEDDEDDEDDEDDDDDEEDDSEEEAMETTPAK	AAAAAPAS[79.9663]EDEDDEDDEDDEDDDDDEEDDSEEEAMET[79.9663]TPAK	K	G	177	217	41	4	37T(79.9663),8S(79.9663)	sp|P19338|NUCL_HUMAN	P19338	NUCL_HUMAN	NCL	Nucleolin			1	0	MS/MS	STY:79.9663@AAAAAPAS(0.6761)EDEDDEDDEDDEDDDDDEEDDS(0.0804)EEEAMET(0.6217)T(0.6217)PAK;
AAAAAPASEDEDDEDDEDDEDDDDDEEDDSEEEAMETTPAK	AAAAAPAS[79.9663]EDEDDEDDEDDEDDDDDEEDDS[79.9663]EEEAMETTPAK	K	G	177	217	41	4	30S(79.9663),8S(79.9663)	sp|P19338|NUCL_HUMAN	P19338	NUCL_HUMAN	NCL	Nucleolin			3	6.0003408E7	MS/MS	STY:79.9663@AAAAAPAS(0.8518)EDEDDEDDEDDEDDDDDEEDDS(0.8522)EEEAMET(0.1480)T(0.1480)PAK;
AAAAAPASEDEDDEDDEDDEDDDDDEEDDSEEEAMETTPAK	AAAAAPAS[79.9663]EDEDDEDDEDDEDDDDDEEDDS[79.9663]EEEAM[15.9949]ETTPAK	K	G	177	217	41	4	30S(79.9663),35M(15.9949),8S(79.9663)	sp|P19338|NUCL_HUMAN	P19338	NUCL_HUMAN	NCL	Nucleolin			3	4.9521752E7	MS/MS	STY:79.9663@AAAAAPAS(0.9319)EDEDDEDDEDDEDDDDDEEDDS(0.9325)EEEAMET(0.0678)T(0.0678)PAK;M:15.9949@AAAAAPASEDEDDEDDEDDEDDDDDEEDDSEEEAM(1.0000)ETTPAK;
AADPPAENSSAPEAEQGGAE	AADPPAENSS[79.9663]APEAEQGGAE	K	-	305	324	20	2	10S(79.9663)	sp|P67809|YBOX1_HUMAN	P67809	YBOX1_HUMAN	YBX1	Y-box-binding protein 1			2	2.6841044E7	MS/MS	STY:79.9663@AADPPAENS(0.0696)S(0.9304)APEAEQGGAE;
AADPPAENSSAPEAEQGGAE	AADPPAENS[79.9663]SAPEAEQGGAE	K	-	305	324	20	2	9S(79.9663)	sp|P67809|YBOX1_HUMAN	P67809	YBOX1_HUMAN	YBX1	Y-box-binding protein 1			2	2.6841044E7	MS/MS	STY:79.9663@AADPPAENS(0.5000)S(0.5000)APEAEQGGAE;
AADRLPNLSSPSAEGPPGPPSGPAPR	AADRLPNLSSPSAEGPPGPPS[79.9663]GPAPR	K	K	454	479	26	3	21S(79.9663)	sp|O60784-2|TOM1_HUMAN	O60784-2	TOM1_HUMAN	TOM1	Isoform 2 of Target of Myb1 membrane trafficking protein		sp|O60784-3|TOM1_HUMAN, sp|O60784-4|TOM1_HUMAN, sp|O60784|TOM1_HUMAN	1	0	MS/MS	STY:79.9663@AADRLPNLS(0.0604)S(0.0604)PS(0.0604)AEGPPGPPS(0.8188)GPAPR;
AADRLPNLSSPSAEGPPGPPSGPAPR	AADRLPNLSS[79.9663]PSAEGPPGPPSGPAPR	K	K	454	479	26	3	10S(79.9663)	sp|O60784-2|TOM1_HUMAN	O60784-2	TOM1_HUMAN	TOM1	Isoform 2 of Target of Myb1 membrane trafficking protein		sp|O60784-3|TOM1_HUMAN, sp|O60784-4|TOM1_HUMAN, sp|O60784|TOM1_HUMAN	1	8577836	MS/MS	STY:79.9663@AADRLPNLS(0.0234)S(0.4804)PS(0.4804)AEGPPGPPS(0.0158)GPAPR;
AADRLPNLSSPSAEGPPGPPSGPAPR	AADRLPNLS[79.9663]SPSAEGPPGPPSGPAPR	K	K	454	479	26	3	9S(79.9663)	sp|O60784-2|TOM1_HUMAN	O60784-2	TOM1_HUMAN	TOM1	Isoform 2 of Target of Myb1 membrane trafficking protein		sp|O60784-3|TOM1_HUMAN, sp|O60784-4|TOM1_HUMAN, sp|O60784|TOM1_HUMAN	1	8577836	MS/MS	STY:79.9663@AADRLPNLS(0.3296)S(0.3296)PS(0.3296)AEGPPGPPS(0.0111)GPAPR;
AADSDDGAVSAPAASDGGVSK	AADS[79.9663]DDGAVSAPAASDGGVSK	M	S	2	22	21	2	4S(79.9663)	sp|Q96GM8|TOE1_HUMAN	Q96GM8	TOE1_HUMAN	TOE1	Target of EGR1 protein 1			1	0	MS/MS	STY:79.9663@AADS(0.9353)DDGAVS(0.0203)APAAS(0.0222)DGGVS(0.0222)K;
AADSSDSDGAEESPAEPGAPR	AADS[79.9663]S[79.9663]DS[79.9663]DGAEESPAEPGAPR	R	E	13	33	21	2	4S(79.9663),5S(79.9663),7S(79.9663)	sp|P16383-2|GCFC2_HUMAN	P16383-2	GCFC2_HUMAN	GCFC2	Isoform 2 of Intron Large complex component GCFC2		sp|P16383-3|GCFC2_HUMAN, sp|P16383-4|GCFC2_HUMAN, sp|P16383|GCFC2_HUMAN	3	4754317	MS/MS	STY:79.9663@AADS(0.9122)S(0.9122)DS(0.9122)DGAEES(0.2635)PAEPGAPR;
AAEAGGAEEQYGFLTTPTK	AAEAGGAEEQYGFLT[79.9663]TPTK	K	Q	1052	1070	19	2	15T(79.9663)	sp|P46821|MAP1B_HUMAN	P46821	MAP1B_HUMAN	MAP1B	Microtubule-associated protein 1B			1	0	MS/MS	STY:79.9663@AAEAGGAEEQY(0.0142)GFLT(0.3286)T(0.3286)PT(0.3286)K;
AAEEAFVNDIDESSPGTEWER	AAEEAFVNDIDES[79.9663]SPGTEWER	R	V	163	183	21	3	13S(79.9663)	sp|P09496-2|CLCA_HUMAN	P09496-2	CLCA_HUMAN	CLTA	Isoform Non-brain of Clathrin light chain A		sp|P09496-5|CLCA_HUMAN	1	0	MS/MS	STY:79.9663@AAEEAFVNDIDES(0.3333)S(0.3333)PGT(0.3333)EWER;
AAEEQGDDQDSEK	AAEEQGDDQDS[79.9663]EK	K	S	175	187	13	2	11S(79.9663)	sp|Q1KMD3|HNRL2_HUMAN	Q1KMD3	HNRL2_HUMAN	HNRNPUL2	Heterogeneous nuclear ribonucleoprotein U-like protein 2			1	0	MS/MS	STY:79.9663@AAEEQGDDQDS(1.0000)EK;
AAESETPGKSPEK	AAESETPGKS[79.9663]PEK	K	K	198	210	13	2	10S(79.9663)	sp|O76021-2|RL1D1_HUMAN	O76021-2	RL1D1_HUMAN	RSL1D1	Isoform 2 of Ribosomal L1 domain-containing protein 1		sp|O76021|RL1D1_HUMAN	1	9036634	MS/MS	STY:79.9663@AAES(0.0572)ET(0.0584)PGKS(0.8844)PEK;
AAESETPGKSPEK	AAES[79.9663]ETPGKSPEK	K	K	198	210	13	2	4S(79.9663)	sp|O76021-2|RL1D1_HUMAN	O76021-2	RL1D1_HUMAN	RSL1D1	Isoform 2 of Ribosomal L1 domain-containing protein 1		sp|O76021|RL1D1_HUMAN	1	0	MS/MS	STY:79.9663@AAES(0.3333)ET(0.3333)PGKS(0.3333)PEK;
AAFTTPDHAPLSPQSSVASSGSEQTEEQGSSR	AAFTTPDHAPLSPQSSVASSGS[79.9663]EQTEEQGSSR	R	N	260	291	32	3	22S(79.9663)	sp|Q5PRF9|SMAG2_HUMAN	Q5PRF9	SMAG2_HUMAN	SAMD4B	Protein Smaug homolog 2			1	0	MS/MS	STY:79.9663@AAFT(0.0534)T(0.0534)PDHAPLS(0.0534)PQS(0.0534)S(0.0534)VAS(0.0758)S(0.0758)GS(0.1453)EQT(0.1453)EEQGS(0.1453)S(0.1453)R;
AAFTTPDHAPLSPQSSVASSGSEQTEEQGSSR	AAFTTPDHAPLS[79.9663]PQSSVASSGSEQTEEQGSSR	R	N	260	291	32	3	12S(79.9663)	sp|Q5PRF9|SMAG2_HUMAN	Q5PRF9	SMAG2_HUMAN	SAMD4B	Protein Smaug homolog 2			1	0	MS/MS	STY:79.9663@AAFT(0.0082)T(0.0082)PDHAPLS(0.1599)PQS(0.1599)S(0.1599)VAS(0.1599)S(0.1599)GS(0.1599)EQT(0.0081)EEQGS(0.0081)S(0.0081)R;
AAFTTPDHAPLSPQSSVASSGSEQTEEQGSSR	AAFT[79.9663]TPDHAPLSPQSSVASSGSEQTEEQGSSR	R	N	260	291	32	3	4T(79.9663)	sp|Q5PRF9|SMAG2_HUMAN	Q5PRF9	SMAG2_HUMAN	SAMD4B	Protein Smaug homolog 2			1	0	MS/MS	STY:79.9663@AAFT(0.2291)T(0.2291)PDHAPLS(0.2291)PQS(0.2291)S(0.0166)VAS(0.0166)S(0.0166)GS(0.0166)EQT(0.0081)EEQGS(0.0046)S(0.0046)R;
AAGDSGEDSDDSDYENLIDPTEPSNSEYSHSK	AAGDSGEDSDDSDYENLIDPT[79.9663]EPS[79.9663]NS[79.9663]EYSHSK	R	D	364	395	32	3	21T(79.9663),24S(79.9663),26S(79.9663)	sp|Q15018|ABRX2_HUMAN	Q15018	ABRX2_HUMAN	ABRAXAS2	BRISC complex subunit Abraxas 2			1	2.4193648E7	MS/MS	STY:79.9663@AAGDS(0.1123)GEDS(0.0736)DDS(0.0736)DY(0.0736)ENLIDPT(0.4445)EPS(0.4445)NS(0.4445)EY(0.4445)S(0.4445)HS(0.4445)K;
AAGDSGEDSDDSDYENLIDPTEPSNSEYSHSK	AAGDS[79.9663]GEDS[79.9663]DDS[79.9663]DYENLIDPTEPSNSEYSHSK	R	D	364	395	32	3	12S(79.9663),5S(79.9663),9S(79.9663)	sp|Q15018|ABRX2_HUMAN	Q15018	ABRX2_HUMAN	ABRAXAS2	BRISC complex subunit Abraxas 2			3	3.4858068E7	MS/MS	STY:79.9663@AAGDS(0.7232)GEDS(0.7232)DDS(0.6000)DY(0.6000)ENLIDPT(0.0212)EPS(0.0952)NS(0.0952)EY(0.0473)S(0.0473)HS(0.0473)K;
AAIPPPVYEEQDRPRSPTGPSNSFLANMGGTVAHK	AAIPPPVYEEQDRPRSPTGPSNSFLANMGGT[79.9663]VAHK	K	I	207	241	35	4	31T(79.9663)	sp|Q96I25|SPF45_HUMAN	Q96I25	SPF45_HUMAN	RBM17	Splicing factor 45			1	0	MS/MS	STY:79.9663@AAIPPPVY(0.1386)EEQDRPRS(0.1452)PT(0.1452)GPS(0.1359)NS(0.1359)FLANMGGT(0.2991)VAHK;
AAIPPPVYEEQDRPRSPTGPSNSFLANMGGTVAHK	AAIPPPVYEEQDRPRSPTGPSNS[79.9663]FLANMGGTVAHK	K	I	207	241	35	4,5	23S(79.9663)	sp|Q96I25|SPF45_HUMAN	Q96I25	SPF45_HUMAN	RBM17	Splicing factor 45			2	4.4777076E7	MS/MS	STY:79.9663@AAIPPPVY(0.0365)EEQDRPRS(0.0365)PT(0.0365)GPS(0.0365)NS(0.8357)FLANMGGT(0.0182)VAHK;
AAIPPPVYEEQDRPRSPTGPSNSFLANMGGTVAHK	AAIPPPVYEEQDRPRSPTGPS[79.9663]NSFLANMGGTVAHK	K	I	207	241	35	5	21S(79.9663)	sp|Q96I25|SPF45_HUMAN	Q96I25	SPF45_HUMAN	RBM17	Splicing factor 45			1	1.2235254E7	MS/MS	STY:79.9663@AAIPPPVY(0.0380)EEQDRPRS(0.0380)PT(0.0380)GPS(0.8500)NS(0.0242)FLANMGGT(0.0118)VAHK;
AAIPPPVYEEQDRPRSPTGPSNSFLANMGGTVAHK	AAIPPPVYEEQDRPRS[79.9663]PTGPSNSFLANMGGTVAHK	K	I	207	241	35	4	16S(79.9663)	sp|Q96I25|SPF45_HUMAN	Q96I25	SPF45_HUMAN	RBM17	Splicing factor 45			1	3.241891E7	MS/MS	STY:79.9663@AAIPPPVY(0.1215)EEQDRPRS(0.8168)PT(0.0181)GPS(0.0140)NS(0.0140)FLANMGGT(0.0157)VAHK;
AAIPPPVYEEQDRPRSPTGPSNSFLANMGGTVAHK	AAIPPPVY[79.9663]EEQDRPRSPTGPSNSFLANMGGTVAHK	K	I	207	241	35	4	8Y(79.9663)	sp|Q96I25|SPF45_HUMAN	Q96I25	SPF45_HUMAN	RBM17	Splicing factor 45			1	0	MS/MS	STY:79.9663@AAIPPPVY(0.8792)EEQDRPRS(0.0267)PT(0.0267)GPS(0.0239)NS(0.0239)FLANMGGT(0.0197)VAHK;
AAKLSEGSQPAEEEEDQETPSR	AAKLSEGSQPAEEEEDQET[79.9663]PSR	R	N	236	257	22	3	19T(79.9663)	sp|Q9UKV3-5|ACINU_HUMAN	Q9UKV3-5	ACINU_HUMAN	ACIN1	Isoform 4 of Apoptotic chromatin condensation inducer in the nucleus		sp|Q9UKV3|ACINU_HUMAN	1	0	MS/MS	STY:79.9663@AAKLS(0.0970)EGS(0.0970)QPAEEEEDQET(0.4030)PS(0.4030)R;
AAKLSEGSQPAEEEEDQETPSR	AAKLS[79.9663]EGSQPAEEEEDQETPSR	R	N	236	257	22	3	5S(79.9663)	sp|Q9UKV3-5|ACINU_HUMAN	Q9UKV3-5	ACINU_HUMAN	ACIN1	Isoform 4 of Apoptotic chromatin condensation inducer in the nucleus		sp|Q9UKV3|ACINU_HUMAN	1	0	MS/MS	STY:79.9663@AAKLS(0.4766)EGS(0.4766)QPAEEEEDQET(0.0234)PS(0.0234)R;
AAKLSEGSQPAEEEEDQETPSR	AAKLS[79.9663]EGS[79.9663]QPAEEEEDQETPSR	R	N	236	257	22	3	5S(79.9663),8S(79.9663)	sp|Q9UKV3-5|ACINU_HUMAN	Q9UKV3-5	ACINU_HUMAN	ACIN1	Isoform 4 of Apoptotic chromatin condensation inducer in the nucleus		sp|Q9UKV3|ACINU_HUMAN	3	1.0830286E7	MS/MS	STY:79.9663@AAKLS(0.6758)EGS(0.6758)QPAEEEEDQET(0.3242)PS(0.3242)R;
AAKNSEEEEEEK	AAKNS[79.9663]EEEEEEK	K	K	569	580	12	2	5S(79.9663)	sp|Q14978-2|NOLC1_HUMAN	Q14978-2	NOLC1_HUMAN	NOLC1	Isoform Beta of Nucleolar and coiled-body phosphoprotein 1		sp|Q14978-3|NOLC1_HUMAN, sp|Q14978|NOLC1_HUMAN	3	4.8952348E7	MS/MS	STY:79.9663@AAKNS(1.0000)EEEEEEK;
AALAPAKESPRK	AALAPAKES[79.9663]PRK	R	G	898	909	12	3	9S(79.9663)	sp|Q13428-6|TCOF_HUMAN	Q13428-6	TCOF_HUMAN	TCOF1	Isoform 6 of Treacle protein		sp|Q13428-2|TCOF_HUMAN, sp|Q13428-3|TCOF_HUMAN, sp|Q13428-4|TCOF_HUMAN, sp|Q13428-5|TCOF_HUMAN, sp|Q13428-7|TCOF_HUMAN, sp|Q13428-8|TCOF_HUMAN, sp|Q13428|TCOF_HUMAN	1	1.63994e+06	MS/MS	STY:79.9663@AALAPAKES(1.0000)PRK;
AALLAQYADVTDEEDEADEK	AALLAQYADVT[79.9663]DEEDEADEK	K	D	129	148	20	2	11T(79.9663)	sp|Q96MW1|CCD43_HUMAN	Q96MW1	CCD43_HUMAN	CCDC43	Coiled-coil domain-containing protein 43			1	2.6019598E7	MS/MS	STY:79.9663@AALLAQY(0.0607)ADVT(0.9393)DEEDEADEK;
AALLAQYADVTDEEDEADEKDDSGATTMNIGSDK	AALLAQYADVT[79.9663]DEEDEADEKDDSGATTMNIGSDK	K	L	129	162	34	3	11T(79.9663)	sp|Q96MW1|CCD43_HUMAN	Q96MW1	CCD43_HUMAN	CCDC43	Coiled-coil domain-containing protein 43			1	0	MS/MS	STY:79.9663@AALLAQY(0.2779)ADVT(0.3581)DEEDEADEKDDS(0.2579)GAT(0.0442)T(0.0442)MNIGS(0.0177)DK;
AALLAQYADVTDEEDEADEK	AALLAQY[79.9663]ADVTDEEDEADEK	K	D	129	148	20	2	7Y(79.9663)	sp|Q96MW1|CCD43_HUMAN	Q96MW1	CCD43_HUMAN	CCDC43	Coiled-coil domain-containing protein 43			1	2.6019598E7	MS/MS	STY:79.9663@AALLAQY(0.8472)ADVT(0.1528)DEEDEADEK;
AAPAQVRPPSPGNIRPVK	AAPAQVRPPS[79.9663]PGNIRPVK	K	R	319	336	18	3	10S(79.9663)	sp|Q14244-2|MAP7_HUMAN	Q14244-2	MAP7_HUMAN	MAP7	Isoform 2 of Ensconsin		sp|Q14244-3|MAP7_HUMAN, sp|Q14244-4|MAP7_HUMAN, sp|Q14244-5|MAP7_HUMAN, sp|Q14244-6|MAP7_HUMAN, sp|Q14244-7|MAP7_HUMAN, sp|Q14244|MAP7_HUMAN	1	6.30989e+06	MS/MS	STY:79.9663@AAPAQVRPPS(1.0000)PGNIRPVK;
AAPEASSPPASPLQHLLPGK	AAPEASS[79.9663]PPASPLQHLLPGK	K	A	673	692	20	3	7S(79.9663)	sp|Q96TA1-2|NIBA2_HUMAN	Q96TA1-2	NIBA2_HUMAN	NIBAN2	Isoform 2 of Protein Niban 2		sp|Q96TA1|NIBA2_HUMAN	1	1.1972416E7	MS/MS	STY:79.9663@AAPEAS(0.0404)S(0.9213)PPAS(0.0383)PLQHLLPGK;
AAPEASSPPASPLQHLLPGK	AAPEAS[79.9663]SPPASPLQHLLPGK	K	A	673	692	20	3	6S(79.9663)	sp|Q96TA1-2|NIBA2_HUMAN	Q96TA1-2	NIBA2_HUMAN	NIBAN2	Isoform 2 of Protein Niban 2		sp|Q96TA1|NIBA2_HUMAN	2	1.1930514E7	MS/MS	STY:79.9663@AAPEAS(0.4802)S(0.4802)PPAS(0.0396)PLQHLLPGK;
AAPEASSPPASPLQHLLPGK	AAPEAS[79.9663]SPPAS[79.9663]PLQHLLPGK	K	A	673	692	20	3	11S(79.9663),6S(79.9663)	sp|Q96TA1-2|NIBA2_HUMAN	Q96TA1-2	NIBA2_HUMAN	NIBAN2	Isoform 2 of Protein Niban 2		sp|Q96TA1|NIBA2_HUMAN	3	1.43000896E8	MS/MS	STY:79.9663@AAPEAS(0.6569)S(0.6569)PPAS(0.6862)PLQHLLPGK;
AAPEASSPPASPLQHLLPGK	AAPEAS[79.9663]S[79.9663]PPASPLQHLLPGK	K	A	673	692	20	3	6S(79.9663),7S(79.9663)	sp|Q96TA1-2|NIBA2_HUMAN	Q96TA1-2	NIBA2_HUMAN	NIBAN2	Isoform 2 of Protein Niban 2		sp|Q96TA1|NIBA2_HUMAN	3	1.43000896E8	MS/MS	STY:79.9663@AAPEAS(0.7317)S(0.7317)PPAS(0.5366)PLQHLLPGK;
AAPQSPSVPK	AAPQS[79.9663]PSVPK	K	K	929	938	10	2	5S(79.9663)	sp|O75694-2|NU155_HUMAN	O75694-2	NU155_HUMAN	NUP155	Isoform 2 of Nuclear pore complex protein Nup155		sp|O75694|NU155_HUMAN	1	2.33687e+06	MS/MS	STY:79.9663@AAPQS(0.5000)PS(0.5000)VPK;
AASAPAKESPRK	AASAPAKES[79.9663]PRK	R	G	438	449	12	3	9S(79.9663)	sp|Q13428-6|TCOF_HUMAN	Q13428-6	TCOF_HUMAN	TCOF1	Isoform 6 of Treacle protein		sp|Q13428-2|TCOF_HUMAN, sp|Q13428-3|TCOF_HUMAN, sp|Q13428-4|TCOF_HUMAN, sp|Q13428-5|TCOF_HUMAN, sp|Q13428-7|TCOF_HUMAN, sp|Q13428-8|TCOF_HUMAN, sp|Q13428|TCOF_HUMAN	1	1.27856e+06	MS/MS	STY:79.9663@AAS(0.0837)APAKES(0.9163)PRK;
AASPSPQSVR	AASPS[79.9663]PQSVR	K	R	736	745	10	2	5S(79.9663)	sp|Q8IYB3|SRRM1_HUMAN	Q8IYB3	SRRM1_HUMAN	SRRM1	Serine/arginine repetitive matrix protein 1		sp|Q8IYB3-2|SRRM1_HUMAN	1	4678931	MS/MS	STY:79.9663@AAS(0.0622)PS(0.8993)PQS(0.0385)VR;
AASSDQLRDNSPPPAFKPEPPK	AASSDQLRDNS[79.9663]PPPAFKPEPPK	R	A	953	974	22	3	11S(79.9663)	sp|Q9UDY2-3|ZO2_HUMAN	Q9UDY2-3	ZO2_HUMAN	TJP2	Isoform C1 of Tight junction protein ZO-2		sp|Q9UDY2-7|ZO2_HUMAN, sp|Q9UDY2|ZO2_HUMAN	1	6698377	MS/MS	STY:79.9663@AAS(0.0747)S(0.0747)DQLRDNS(0.8506)PPPAFKPEPPK;
AASSSSPGSPVASSPSR	AASSS[79.9663]S[79.9663]PGSPVASSPSR	R	L	1772	1788	17	2	5S(79.9663),6S(79.9663)	sp|Q92538-3|GBF1_HUMAN	Q92538-3	GBF1_HUMAN	GBF1	Isoform 3 of Golgi-specific brefeldin A-resistance guanine nucleotide exchange factor 1		sp|Q92538-2|GBF1_HUMAN, sp|Q92538|GBF1_HUMAN	1	6.39268e+06	MS/MS	STY:79.9663@AAS(0.0793)S(0.0793)S(0.7224)S(0.7224)PGS(0.0739)PVAS(0.0371)S(0.1427)PS(0.1427)R;
AASDTERDGLAPEK	AAS[79.9663]DTERDGLAPEK	M	T	2	15	14	2	3S(79.9663)	sp|Q7L4I2|RSRC2_HUMAN	Q7L4I2	RSRC2_HUMAN	RSRC2	Arginine/serine-rich coiled-coil protein 2			1	0	MS/MS	STY:79.9663@AAS(0.5000)DT(0.5000)ERDGLAPEK;
AASPPASASDLIEQQQK	AAS[79.9663]PPASASDLIEQQQK	R	R	333	349	17	2	3S(79.9663)	sp|Q5VSL9|STRP1_HUMAN	Q5VSL9	STRP1_HUMAN	STRIP1	Striatin-interacting protein 1		sp|Q5VSL9-2|STRP1_HUMAN, sp|Q5VSL9-3|STRP1_HUMAN	2	1.3066639E7	MS/MS	STY:79.9663@AAS(0.9310)PPAS(0.0360)AS(0.0329)DLIEQQQK;
AASPSPQSVR	AAS[79.9663]PSPQSVR	K	R	736	745	10	2	3S(79.9663)	sp|Q8IYB3|SRRM1_HUMAN	Q8IYB3	SRRM1_HUMAN	SRRM1	Serine/arginine repetitive matrix protein 1		sp|Q8IYB3-2|SRRM1_HUMAN	2	1.903248E7	MS/MS	STY:79.9663@AAS(0.9397)PS(0.0302)PQS(0.0301)VR;
AASPSPQSVR	AAS[79.9663]PSPQS[79.9663]VR	K	R	736	745	10	2	3S(79.9663),8S(79.9663)	sp|Q8IYB3|SRRM1_HUMAN	Q8IYB3	SRRM1_HUMAN	SRRM1	Serine/arginine repetitive matrix protein 1		sp|Q8IYB3-2|SRRM1_HUMAN	1	5.0939416E7	MS/MS	STY:79.9663@AAS(0.9374)PS(0.1254)PQS(0.9373)VR;
AASPSPQSVR	AAS[79.9663]PS[79.9663]PQSVR	K	R	736	745	10	2	3S(79.9663),5S(79.9663)	sp|Q8IYB3|SRRM1_HUMAN	Q8IYB3	SRRM1_HUMAN	SRRM1	Serine/arginine repetitive matrix protein 1		sp|Q8IYB3-2|SRRM1_HUMAN	7	8.1673744E7	MS/MS	STY:79.9663@AAS(0.9454)PS(0.9454)PQS(0.1091)VR;
AASPSPQSVR	AAS[79.9663]PS[79.9663]PQS[79.9663]VR	K	R	736	745	10	2	3S(79.9663),5S(79.9663),8S(79.9663)	sp|Q8IYB3|SRRM1_HUMAN	Q8IYB3	SRRM1_HUMAN	SRRM1	Serine/arginine repetitive matrix protein 1		sp|Q8IYB3-2|SRRM1_HUMAN	1	6982404	MS/MS	STY:79.9663@AAS(1.0000)PS(1.0000)PQS(1.0000)VR;
AASSDQLRDNSPPPAFKPEPPK	AAS[79.9663]S[79.9663]DQLRDNSPPPAFKPEPPK	R	A	953	974	22	3	3S(79.9663),4S(79.9663)	sp|Q9UDY2-3|ZO2_HUMAN	Q9UDY2-3	ZO2_HUMAN	TJP2	Isoform C1 of Tight junction protein ZO-2		sp|Q9UDY2-7|ZO2_HUMAN, sp|Q9UDY2|ZO2_HUMAN	1	4898827	MS/MS	STY:79.9663@AAS(0.7799)S(0.7799)DQLRDNS(0.4403)PPPAFKPEPPK;
AATAARPPAPPPAPQPPSPTPSPPRPTLAR	AAT[79.9663]AARPPAPPPAPQPPS[79.9663]PTPSPPRPTLAR	R	E	91	120	30	3	18S(79.9663),3T(79.9663)	sp|Q96B36-3|AKTS1_HUMAN	Q96B36-3	AKTS1_HUMAN	AKT1S1	Isoform 3 of Proline-rich AKT1 substrate 1		sp|Q96B36|AKTS1_HUMAN	1	3.1017968E7	MS/MS	STY:79.9663@AAT(0.4000)AARPPAPPPAPQPPS(0.4000)PT(0.4000)PS(0.4000)PPRPT(0.4000)LAR;
AAVGQESPGGLEAGNAK	AAVGQES[79.9663]PGGLEAGNAK	R	A	1299	1315	17	2	7S(79.9663)	sp|Q29RF7|PDS5A_HUMAN	Q29RF7	PDS5A_HUMAN	PDS5A	Sister chromatid cohesion protein PDS5 homolog A			1	0	MS/MS	STY:79.9663@AAVGQES(1.0000)PGGLEAGNAK;
AAVLSDSEDEEK	AAVLS[79.9663]DSEDEEK	K	A	394	405	12	2	5S(79.9663)	sp|Q96ST2|IWS1_HUMAN	Q96ST2	IWS1_HUMAN	IWS1	Protein IWS1 homolog		sp|Q96ST2-2|IWS1_HUMAN, sp|Q96ST2-3|IWS1_HUMAN	1	0	MS/MS	STY:79.9663@AAVLS(0.5000)DS(0.5000)EDEEK;
AAVLSDSEDEEK	AAVLS[79.9663]DS[79.9663]EDEEK	K	A	394	405	12	2	5S(79.9663),7S(79.9663)	sp|Q96ST2|IWS1_HUMAN	Q96ST2	IWS1_HUMAN	IWS1	Protein IWS1 homolog		sp|Q96ST2-2|IWS1_HUMAN, sp|Q96ST2-3|IWS1_HUMAN	4	3.8186136E7	MS/MS	STY:79.9663@AAVLS(1.0000)DS(1.0000)EDEEK;
AAYGDLSSEEEEENEPESLGVVYK	AAY[79.9663]GDLS[79.9663]SEEEEENEPESLGVVYK	K	S	78	101	24	3	3Y(79.9663),7S(79.9663)	sp|O15541|R113A_HUMAN	O15541	R113A_HUMAN	RNF113A	E3 ubiquitin-protein ligase RNF113A			1	1.7176896E7	MS/MS	STY:79.9663@AAY(0.5680)GDLS(0.5680)S(0.5680)EEEEENEPES(0.1480)LGVVY(0.1480)K;
ADAPDAGAQSDSELPSYHQNDVSLDR	ADAPDAGAQS[79.9663]DSELPSYHQNDVSLDR	R	G	1289	1314	26	3	10S(79.9663)	sp|Q92538-3|GBF1_HUMAN	Q92538-3	GBF1_HUMAN	GBF1	Isoform 3 of Golgi-specific brefeldin A-resistance guanine nucleotide exchange factor 1		sp|Q92538-2|GBF1_HUMAN, sp|Q92538|GBF1_HUMAN	3	3.7794608E7	MS/MS	STY:79.9663@ADAPDAGAQS(0.9200)DS(0.0157)ELPS(0.0245)Y(0.0201)HQNDVS(0.0196)LDR;
ADDFPVRDDPSDVTDEDEGPAEPPPPPK	ADDFPVRDDPS[79.9663]DVT[79.9663]DEDEGPAEPPPPPK	R	L	587	614	28	3	11S(79.9663),14T(79.9663)	sp|Q3YEC7-2|RABL6_HUMAN	Q3YEC7-2	RABL6_HUMAN	RABL6	Isoform 2 of Rab-like protein 6		sp|Q3YEC7|RABL6_HUMAN	2	1.782033E7	MS/MS	STY:79.9663@ADDFPVRDDPS(1.0000)DVT(1.0000)DEDEGPAEPPPPPK;
ADEASELACPTPK	ADEASELAC[57.0215]PT[79.9663]PK	K	E	2194	2206	13	2	11T(79.9663),9C(57.0215)	sp|P49327|FAS_HUMAN	P49327	FAS_HUMAN	FASN	Fatty acid synthase			1	0	MS/MS	STY:79.9663@ADEAS(0.0601)ELACPT(0.9399)PK;
ADEASELACPTPKEDGLAQQQTQLNLR	ADEASELAC[57.0215]PT[79.9663]PKEDGLAQQQTQLNLR	K	S	2194	2220	27	3	11T(79.9663),9C(57.0215)	sp|P49327|FAS_HUMAN	P49327	FAS_HUMAN	FASN	Fatty acid synthase			2	1.4214904E7	MS/MS	STY:79.9663@ADEAS(0.1766)ELACPT(0.7610)PKEDGLAQQQT(0.0623)QLNLR;
ADEASELACPTPKEDGLAQQQTQLNLR	ADEAS[79.9663]ELAC[57.0215]PTPKEDGLAQQQTQLNLR	K	S	2194	2220	27	3	5S(79.9663),9C(57.0215)	sp|P49327|FAS_HUMAN	P49327	FAS_HUMAN	FASN	Fatty acid synthase			1	1.4214904E7	MS/MS	STY:79.9663@ADEAS(0.4803)ELACPT(0.4803)PKEDGLAQQQT(0.0395)QLNLR;
ADEESDSQMSPSHSSTDDHSNWFIIGSK	ADEES[79.9663]DSQMSPSHSSTDDHSNWFIIGSK	K	T	373	400	28	3	5S(79.9663)	sp|Q8NEM7-2|SP20H_HUMAN	Q8NEM7-2	SP20H_HUMAN	SUPT20H	Isoform 2 of Transcription factor SPT20 homolog		sp|Q8NEM7-3|SP20H_HUMAN, sp|Q8NEM7|SP20H_HUMAN	1	0	MS/MS	STY:79.9663@ADEES(0.4228)DS(0.4228)QMS(0.0409)PS(0.0409)HS(0.0165)S(0.0165)T(0.0165)DDHS(0.0115)NWFIIGS(0.0115)K;
ADEPSSEESDLEIDK	ADEPSSEES[79.9663]DLEIDK	K	E	71	85	15	2	9S(79.9663)	sp|P50502|F10A1_HUMAN	P50502	F10A1_HUMAN	ST13	Hsc70-interacting protein	ST13P4	sp|Q8IZP2|ST134_HUMAN	1	5069814	MS/MS	STY:79.9663@ADEPS(0.2983)S(0.2983)EES(0.4034)DLEIDK;
ADEPSSEESDLEIDK	ADEPSS[79.9663]EES[79.9663]DLEIDK	K	E	71	85	15	2	6S(79.9663),9S(79.9663)	sp|P50502|F10A1_HUMAN	P50502	F10A1_HUMAN	ST13	Hsc70-interacting protein	ST13P4	sp|Q8IZP2|ST134_HUMAN	2	1.7830536E8	MS/MS	STY:79.9663@ADEPS(0.1261)S(0.9369)EES(0.9370)DLEIDK;
ADEPSSEESDLEIDK	ADEPS[79.9663]SEESDLEIDK	K	E	71	85	15	2	5S(79.9663)	sp|P50502|F10A1_HUMAN	P50502	F10A1_HUMAN	ST13	Hsc70-interacting protein	ST13P4	sp|Q8IZP2|ST134_HUMAN	2	5.2037e+06	MS/MS	STY:79.9663@ADEPS(0.3333)S(0.3333)EES(0.3333)DLEIDK;
ADEPSSEESDLEIDK	ADEPS[79.9663]SEES[79.9663]DLEIDK	K	E	71	85	15	2	5S(79.9663),9S(79.9663)	sp|P50502|F10A1_HUMAN	P50502	F10A1_HUMAN	ST13	Hsc70-interacting protein	ST13P4	sp|Q8IZP2|ST134_HUMAN	11	1.801968E8	MS/MS	STY:79.9663@ADEPS(0.8878)S(0.2041)EES(0.9081)DLEIDK;
ADEPSSEESDLEIDK	ADEPS[79.9663]S[79.9663]EESDLEIDK	K	E	71	85	15	2	5S(79.9663),6S(79.9663)	sp|P50502|F10A1_HUMAN	P50502	F10A1_HUMAN	ST13	Hsc70-interacting protein	ST13P4	sp|Q8IZP2|ST134_HUMAN	4	1.4877512E8	MS/MS	STY:79.9663@ADEPS(0.9345)S(0.9345)EES(0.1309)DLEIDK;
ADEPSSEESDLEIDK	ADEPS[79.9663]S[79.9663]EES[79.9663]DLEIDK	K	E	71	85	15	2	5S(79.9663),6S(79.9663),9S(79.9663)	sp|P50502|F10A1_HUMAN	P50502	F10A1_HUMAN	ST13	Hsc70-interacting protein	ST13P4	sp|Q8IZP2|ST134_HUMAN	61	8.5733274E8	MS/MS	STY:79.9663@ADEPS(1.0000)S(1.0000)EES(1.0000)DLEIDK;
ADRDQSPFSK	ADRDQS[79.9663]PFSK	K	I	682	691	10	2	6S(79.9663)	sp|Q13427|PPIG_HUMAN	Q13427	PPIG_HUMAN	PPIG	Peptidyl-prolyl cis-trans isomerase G			1	0	MS/MS	STY:79.9663@ADRDQS(0.5000)PFS(0.5000)K;
ADSGPTQPPLSLSPAPETK	ADSGPT[79.9663]QPPLSLSPAPETK	R	R	2071	2089	19	2	6T(79.9663)	sp|O15027-4|SC16A_HUMAN	O15027-4	SC16A_HUMAN	SEC16A	Isoform 4 of Protein transport protein Sec16A		sp|O15027-2|SC16A_HUMAN, sp|O15027-3|SC16A_HUMAN, sp|O15027-5|SC16A_HUMAN, sp|O15027|SC16A_HUMAN	1	6644434	MS/MS	STY:79.9663@ADS(0.0144)GPT(0.5241)QPPLS(0.0627)LS(0.3460)PAPET(0.0527)K;
ADTTTPTPTAILAPGSPASPPGSLEPK	ADTTTPTPTAILAPGSPAS[79.9663]PPGS[79.9663]LEPK	K	A	283	309	27	3	19S(79.9663),23S(79.9663)	sp|P25440-2|BRD2_HUMAN	P25440-2	BRD2_HUMAN	BRD2	Isoform 2 of Bromodomain-containing protein 2		sp|P25440-3|BRD2_HUMAN, sp|P25440-4|BRD2_HUMAN, sp|P25440|BRD2_HUMAN	1	0	MS/MS	STY:79.9663@ADT(0.0259)T(0.0259)T(0.0259)PT(0.0305)PT(0.0326)AILAPGS(0.0308)PAS(0.9328)PPGS(0.8955)LEPK;
ADTTTPTPTAILAPGSPASPPGSLEPK	ADTTTPTPTAILAPGS[79.9663]PAS[79.9663]PPGSLEPK	K	A	283	309	27	3	16S(79.9663),19S(79.9663)	sp|P25440-2|BRD2_HUMAN	P25440-2	BRD2_HUMAN	BRD2	Isoform 2 of Bromodomain-containing protein 2		sp|P25440-3|BRD2_HUMAN, sp|P25440-4|BRD2_HUMAN, sp|P25440|BRD2_HUMAN	1	7911076	MS/MS	STY:79.9663@ADT(0.0817)T(0.1998)T(0.1998)PT(0.0240)PT(0.0240)AILAPGS(0.7107)PAS(0.7380)PPGS(0.0221)LEPK;
ADVQLFMDDDSYSHHSGLEYADPEK	ADVQLFMDDDSYS[79.9663]HHS[79.9663]GLEYADPEK	K	F	8	32	25	3	13S(79.9663),16S(79.9663)	sp|P51636-3|CAV2_HUMAN	P51636-3	CAV2_HUMAN	CAV2	Isoform C of Caveolin-2		sp|P51636|CAV2_HUMAN	2	5.9668932E7	MS/MS	STY:79.9663@ADVQLFMDDDS(0.0459)Y(0.1108)S(0.8890)HHS(0.8934)GLEY(0.0609)ADPEK;
ADVQLFMDDDSYSHHSGLEYADPEK	ADVQLFMDDDS[79.9663]YSHHSGLEYADPEK	K	F	8	32	25	3	11S(79.9663)	sp|P51636-3|CAV2_HUMAN	P51636-3	CAV2_HUMAN	CAV2	Isoform C of Caveolin-2		sp|P51636|CAV2_HUMAN	1	0	MS/MS	STY:79.9663@ADVQLFMDDDS(0.8640)Y(0.0340)S(0.0340)HHS(0.0340)GLEY(0.0340)ADPEK;
ADVQLFMDDDSYSHHSGLEYADPEK	ADVQLFMDDDS[79.9663]YSHHS[79.9663]GLEYADPEK	K	F	8	32	25	3	11S(79.9663),16S(79.9663)	sp|P51636-3|CAV2_HUMAN	P51636-3	CAV2_HUMAN	CAV2	Isoform C of Caveolin-2		sp|P51636|CAV2_HUMAN	1	1.3605751E7	MS/MS	STY:79.9663@ADVQLFMDDDS(0.4720)Y(0.4720)S(0.4720)HHS(0.5331)GLEY(0.0510)ADPEK;
ADVQLFMDDDSYSHHSGLEYADPEK	ADVQLFMDDDS[79.9663]Y[79.9663]SHHSGLEYADPEK	K	F	8	32	25	3	11S(79.9663),12Y(79.9663)	sp|P51636-3|CAV2_HUMAN	P51636-3	CAV2_HUMAN	CAV2	Isoform C of Caveolin-2		sp|P51636|CAV2_HUMAN	5	7.3197192E7	MS/MS	STY:79.9663@ADVQLFMDDDS(0.4819)Y(0.4819)S(0.4819)HHS(0.4819)GLEY(0.0725)ADPEK;
ADVQLFMDDDSYSHHSGLEYADPEK	ADVQLFMDDDS[79.9663]Y[79.9663]SHHSGLEY[79.9663]ADPEK	K	F	8	32	25	3	11S(79.9663),12Y(79.9663),20Y(79.9663)	sp|P51636-3|CAV2_HUMAN	P51636-3	CAV2_HUMAN	CAV2	Isoform C of Caveolin-2		sp|P51636|CAV2_HUMAN	1	1.6289656E7	MS/MS	STY:79.9663@ADVQLFMDDDS(0.7140)Y(0.7140)S(0.7140)HHS(0.1043)GLEY(0.7536)ADPEK;
ADVQLFMDDDSYSHHSGLEYADPEK	ADVQLFMDDDS[79.9663]Y[79.9663]S[79.9663]HHSGLEYADPEK	K	F	8	32	25	3	11S(79.9663),12Y(79.9663),13S(79.9663)	sp|P51636-3|CAV2_HUMAN	P51636-3	CAV2_HUMAN	CAV2	Isoform C of Caveolin-2		sp|P51636|CAV2_HUMAN	1	1.6289656E7	MS/MS	STY:79.9663@ADVQLFMDDDS(0.6118)Y(0.6118)S(0.6118)HHS(0.5823)GLEY(0.5823)ADPEK;
ADVQLFMDDDSYSHHSGLEYADPEK	ADVQLFM[15.9949]DDDSYSHHS[79.9663]GLEYADPEK	K	F	8	32	25	3	16S(79.9663),7M(15.9949)	sp|P51636-3|CAV2_HUMAN	P51636-3	CAV2_HUMAN	CAV2	Isoform C of Caveolin-2		sp|P51636|CAV2_HUMAN	1	0	MS/MS	STY:79.9663@ADVQLFMDDDS(0.0878)Y(0.0878)S(0.0878)HHS(0.7125)GLEY(0.0241)ADPEK;M:15.9949@ADVQLFM(1.0000)DDDSYSHHSGLEYADPEK;
ADVQLFMDDDSYSHHSGLEYADPEK	ADVQLFM[15.9949]DDDS[79.9663]YSHHSGLEY[79.9663]ADPEK	K	F	8	32	25	3	11S(79.9663),20Y(79.9663),7M(15.9949)	sp|P51636-3|CAV2_HUMAN	P51636-3	CAV2_HUMAN	CAV2	Isoform C of Caveolin-2		sp|P51636|CAV2_HUMAN	1	0	MS/MS	STY:79.9663@ADVQLFMDDDS(0.3901)Y(0.3901)S(0.3901)HHS(0.3901)GLEY(0.4394)ADPEK;M:15.9949@ADVQLFM(1.0000)DDDSYSHHSGLEYADPEK;
ADVQLFMDDDSYSHHSGLEYADPEK	ADVQLFM[15.9949]DDDS[79.9663]Y[79.9663]SHHSGLEYADPEK	K	F	8	32	25	3	11S(79.9663),12Y(79.9663),7M(15.9949)	sp|P51636-3|CAV2_HUMAN	P51636-3	CAV2_HUMAN	CAV2	Isoform C of Caveolin-2		sp|P51636|CAV2_HUMAN	1	0	MS/MS	STY:79.9663@ADVQLFMDDDS(0.4567)Y(0.4567)S(0.4567)HHS(0.4567)GLEY(0.1734)ADPEK;M:15.9949@ADVQLFM(1.0000)DDDSYSHHSGLEYADPEK;
AEAEAGSPRPDPR	AEAEAGS[79.9663]PRPDPR	R	E	2502	2514	13	2	7S(79.9663)	sp|P58107|EPIPL_HUMAN	P58107	EPIPL_HUMAN	EPPK1	Epiplakin			1	6.52005e+06	MS/MS	STY:79.9663@AEAEAGS(1.0000)PRPDPR;
AEAPLPSPK	AEAPLPS[79.9663]PK	K	L	5104	5112	9	2	7S(79.9663)	sp|Q09666|AHNK_HUMAN	Q09666	AHNK_HUMAN	AHNAK	Neuroblast differentiation-associated protein AHNAK			3	4.75847e+06	MS/MS	STY:79.9663@AEAPLPS(1.0000)PK;
AEDGATPSPSNETPK	AEDGATPSPSNET[79.9663]PK	K	K	138	152	15	2	13T(79.9663)	sp|P29966|MARCS_HUMAN	P29966	MARCS_HUMAN	MARCKS	Myristoylated alanine-rich C-kinase substrate			2	3.0941696E7	MS/MS	STY:79.9663@AEDGAT(0.0199)PS(0.0200)PS(0.0240)NET(0.9361)PK;
AEDGATPSPSNETPKK	AEDGATPSPSNET[79.9663]PKK	K	K	138	153	16	2	13T(79.9663)	sp|P29966|MARCS_HUMAN	P29966	MARCS_HUMAN	MARCKS	Myristoylated alanine-rich C-kinase substrate			2	1.1442087E7	MS/MS	STY:79.9663@AEDGAT(0.0170)PS(0.2028)PS(0.2028)NET(0.5774)PKK;
AEDGATPSPSNETPK	AEDGATPSPS[79.9663]NETPK	K	K	138	152	15	2	10S(79.9663)	sp|P29966|MARCS_HUMAN	P29966	MARCS_HUMAN	MARCKS	Myristoylated alanine-rich C-kinase substrate			2	4.236238E7	MS/MS	STY:79.9663@AEDGAT(0.0221)PS(0.0239)PS(0.8274)NET(0.1266)PK;
AEDGATPSPSNETPK	AEDGATPS[79.9663]PSNETPK	K	K	138	152	15	2	8S(79.9663)	sp|P29966|MARCS_HUMAN	P29966	MARCS_HUMAN	MARCKS	Myristoylated alanine-rich C-kinase substrate			1	1.6675621E7	MS/MS	STY:79.9663@AEDGAT(0.0185)PS(0.8588)PS(0.0613)NET(0.0613)PK;
AEDGATPSPSNETPK	AEDGATPS[79.9663]PS[79.9663]NETPK	K	K	138	152	15	2	10S(79.9663),8S(79.9663)	sp|P29966|MARCS_HUMAN	P29966	MARCS_HUMAN	MARCKS	Myristoylated alanine-rich C-kinase substrate			1	0	MS/MS	STY:79.9663@AEDGAT(0.0689)PS(0.6437)PS(0.6437)NET(0.6437)PK;
AEDGATPSPSNETPK	AEDGAT[79.9663]PSPSNETPK	K	K	138	152	15	2	6T(79.9663)	sp|P29966|MARCS_HUMAN	P29966	MARCS_HUMAN	MARCKS	Myristoylated alanine-rich C-kinase substrate			2	2.568676E7	MS/MS	STY:79.9663@AEDGAT(0.2500)PS(0.2500)PS(0.2500)NET(0.2500)PK;
AEDGATPSPSNETPKK	AEDGAT[79.9663]PSPSNETPKK	K	K	138	153	16	2	6T(79.9663)	sp|P29966|MARCS_HUMAN	P29966	MARCS_HUMAN	MARCKS	Myristoylated alanine-rich C-kinase substrate			4	1.2211578E7	MS/MS	STY:79.9663@AEDGAT(0.7222)PS(0.0926)PS(0.0926)NET(0.0926)PKK;
AEDGATPSPSNETPK	AEDGAT[79.9663]PS[79.9663]PSNETPK	K	K	138	152	15	2	6T(79.9663),8S(79.9663)	sp|P29966|MARCS_HUMAN	P29966	MARCS_HUMAN	MARCKS	Myristoylated alanine-rich C-kinase substrate			2	3.72847e+06	MS/MS	STY:79.9663@AEDGAT(0.8619)PS(0.8619)PS(0.1381)NET(0.1381)PK;
AEDSDSEPEPEDNVR	AEDS[79.9663]DS[79.9663]EPEPEDNVR	K	L	420	434	15	2	4S(79.9663),6S(79.9663)	sp|Q9H0D6-2|XRN2_HUMAN	Q9H0D6-2	XRN2_HUMAN	XRN2	Isoform 2 of 5'-3' exoribonuclease 2		sp|Q9H0D6|XRN2_HUMAN	2	1.1247115E7	MS/MS	STY:79.9663@AEDS(1.0000)DS(1.0000)EPEPEDNVR;
AEEDEILNRSPR	AEEDEILNRS[79.9663]PR	K	N	609	620	12	2	10S(79.9663)	sp|P27824-2|CALX_HUMAN	P27824-2	CALX_HUMAN	CANX	Isoform 2 of Calnexin		sp|P27824-3|CALX_HUMAN, sp|P27824|CALX_HUMAN	9	1.17413018E9	MS/MS	STY:79.9663@AEEDEILNRS(1.0000)PR;
AEENTDQASPQEDYAGFER	AEENT[79.9663]DQASPQEDYAGFER	K	L	4530	4548	19	2,3	5T(79.9663)	sp|Q9NU22|MDN1_HUMAN	Q9NU22	MDN1_HUMAN	MDN1	Midasin			2	0	MS/MS	STY:79.9663@AEENT(0.4882)DQAS(0.4882)PQEDY(0.0236)AGFER;
AEEPPSQLDQDTQVQDMDEGSDDEEEGQK	AEEPPSQLDQDTQVQDMDEGS[79.9663]DDEEEGQK	K	V	274	302	29	3	21S(79.9663)	sp|Q15459-2|SF3A1_HUMAN	Q15459-2	SF3A1_HUMAN	SF3A1	Isoform 2 of Splicing factor 3A subunit 1		sp|Q15459|SF3A1_HUMAN	12	2.16765568E8	MS/MS	STY:79.9663@AEEPPS(0.0387)QLDQDT(0.0305)QVQDMDEGS(0.9308)DDEEEGQK;
AEEPPSQLDQDTQVQDMDEGSDDEEEGQK	AEEPPSQLDQDTQVQDM[15.9949]DEGS[79.9663]DDEEEGQK	K	V	274	302	29	3	17M(15.9949),21S(79.9663)	sp|Q15459-2|SF3A1_HUMAN	Q15459-2	SF3A1_HUMAN	SF3A1	Isoform 2 of Splicing factor 3A subunit 1		sp|Q15459|SF3A1_HUMAN	5	5.3888648E7	MS/MS	STY:79.9663@AEEPPS(0.0376)QLDQDT(0.0421)QVQDMDEGS(0.9203)DDEEEGQK;M:15.9949@AEEPPSQLDQDTQVQDM(1.0000)DEGSDDEEEGQK;
AEEPPSQLDQDTQVQDMDEGSDDEEEGQK	AEEPPSQLDQDT[79.9663]QVQDMDEGSDDEEEGQK	K	V	274	302	29	3	12T(79.9663)	sp|Q15459-2|SF3A1_HUMAN	Q15459-2	SF3A1_HUMAN	SF3A1	Isoform 2 of Splicing factor 3A subunit 1		sp|Q15459|SF3A1_HUMAN	2	1.81298656E8	MS/MS	STY:79.9663@AEEPPS(0.1100)QLDQDT(0.6030)QVQDMDEGS(0.2870)DDEEEGQK;
AEEPPSQLDQDTQVQDMDEGSDDEEEGQK	AEEPPSQLDQDT[79.9663]QVQDM[15.9949]DEGSDDEEEGQK	K	V	274	302	29	3	12T(79.9663),17M(15.9949)	sp|Q15459-2|SF3A1_HUMAN	Q15459-2	SF3A1_HUMAN	SF3A1	Isoform 2 of Splicing factor 3A subunit 1		sp|Q15459|SF3A1_HUMAN	4	5.3888648E7	MS/MS	STY:79.9663@AEEPPS(0.1450)QLDQDT(0.7157)QVQDMDEGS(0.1392)DDEEEGQK;M:15.9949@AEEPPSQLDQDTQVQDM(1.0000)DEGSDDEEEGQK;
AEEPPSQLDQDTQVQDMDEGSDDEEEGQK	AEEPPS[79.9663]QLDQDTQVQDMDEGSDDEEEGQK	K	V	274	302	29	3	6S(79.9663)	sp|Q15459-2|SF3A1_HUMAN	Q15459-2	SF3A1_HUMAN	SF3A1	Isoform 2 of Splicing factor 3A subunit 1		sp|Q15459|SF3A1_HUMAN	4	1.8327456E8	MS/MS	STY:79.9663@AEEPPS(0.9069)QLDQDT(0.0505)QVQDMDEGS(0.0426)DDEEEGQK;
AEEPPSQLDQDTQVQDMDEGSDDEEEGQK	AEEPPS[79.9663]QLDQDTQVQDM[15.9949]DEGSDDEEEGQK	K	V	274	302	29	3	17M(15.9949),6S(79.9663)	sp|Q15459-2|SF3A1_HUMAN	Q15459-2	SF3A1_HUMAN	SF3A1	Isoform 2 of Splicing factor 3A subunit 1		sp|Q15459|SF3A1_HUMAN	2	5.3888648E7	MS/MS	STY:79.9663@AEEPPS(0.6859)QLDQDT(0.0431)QVQDMDEGS(0.2710)DDEEEGQK;M:15.9949@AEEPPSQLDQDTQVQDM(1.0000)DEGSDDEEEGQK;
AEEQQLPPPLSPPSPSTPNHR	AEEQQLPPPLSPPSPS[79.9663]T[79.9663]PNHR	K	R	279	299	21	3	16S(79.9663),17T(79.9663)	sp|Q6WCQ1-2|MPRIP_HUMAN	Q6WCQ1-2	MPRIP_HUMAN	MPRIP	Isoform 2 of Myosin phosphatase Rho-interacting protein		sp|Q6WCQ1-3|MPRIP_HUMAN, sp|Q6WCQ1|MPRIP_HUMAN	1	0	MS/MS	STY:79.9663@AEEQQLPPPLS(0.2188)PPS(0.2188)PS(0.7812)T(0.7812)PNHR;
AEEQQLPPPLSPPSPSTPNHR	AEEQQLPPPLS[79.9663]PPS[79.9663]PSTPNHR	K	R	279	299	21	3	11S(79.9663),14S(79.9663)	sp|Q6WCQ1-2|MPRIP_HUMAN	Q6WCQ1-2	MPRIP_HUMAN	MPRIP	Isoform 2 of Myosin phosphatase Rho-interacting protein		sp|Q6WCQ1-3|MPRIP_HUMAN, sp|Q6WCQ1|MPRIP_HUMAN	5	2.053492E7	MS/MS	STY:79.9663@AEEQQLPPPLS(0.8617)PPS(0.8606)PS(0.1389)T(0.1389)PNHR;
AEGAATEEEGTPK	AEGAATEEEGT[79.9663]PK	K	E	26	38	13	2	11T(79.9663)	sp|P80723|BASP1_HUMAN	P80723	BASP1_HUMAN	BASP1	Brain acid soluble protein 1		sp|P80723-2|BASP1_HUMAN	1	3.02982e+06	MS/MS	STY:79.9663@AEGAAT(0.0925)EEEGT(0.9075)PK;
AEGAATEEEGTPK	AEGAAT[79.9663]EEEGTPK	K	E	26	38	13	2	6T(79.9663)	sp|P80723|BASP1_HUMAN	P80723	BASP1_HUMAN	BASP1	Brain acid soluble protein 1		sp|P80723-2|BASP1_HUMAN	1	0	MS/MS	STY:79.9663@AEGAAT(0.5000)EEEGT(0.5000)PK;
AEGEPQEESPLK	AEGEPQEES[79.9663]PLK	K	S	167	178	12	2	9S(79.9663)	sp|Q9NYF8-2|BCLF1_HUMAN	Q9NYF8-2	BCLF1_HUMAN	BCLAF1	Isoform 2 of Bcl-2-associated transcription factor 1		sp|Q9NYF8-3|BCLF1_HUMAN, sp|Q9NYF8-4|BCLF1_HUMAN, sp|Q9NYF8|BCLF1_HUMAN	2	9821752	MS/MS	STY:79.9663@AEGEPQEES(1.0000)PLK;
AEGHSDDESDSEGSDSESTSR	AEGHS[79.9663]DDES[79.9663]DS[79.9663]EGSDSESTSR	K	E	219	239	21	3	11S(79.9663),5S(79.9663),9S(79.9663)	sp|Q9P289-2|STK26_HUMAN	Q9P289-2	STK26_HUMAN	STK26	Isoform 2 of Serine/threonine-protein kinase 26		sp|Q9P289-3|STK26_HUMAN, sp|Q9P289|STK26_HUMAN	1	0	MS/MS	STY:79.9663@AEGHS(0.3750)DDES(0.3750)DS(0.3750)EGS(0.3750)DS(0.3750)ES(0.3750)T(0.3750)S(0.3750)R;
AELSYRGPVSGTEPEPVYSMEAADYR	AELSYRGPVS[79.9663]GTEPEPVYSMEAADYR	K	E	429	454	26	3	10S(79.9663)	sp|Q14247|SRC8_HUMAN	Q14247	SRC8_HUMAN	CTTN	Src substrate cortactin		sp|Q14247-2|SRC8_HUMAN, sp|Q14247-3|SRC8_HUMAN	1	0	MS/MS	STY:79.9663@AELS(0.0337)Y(0.0337)RGPVS(0.2304)GT(0.2304)EPEPVY(0.2304)S(0.2304)MEAADY(0.0110)R;
AEPASPDSPKGSSETETEPPVALAPGPAPTR	AEPAS[79.9663]PDS[79.9663]PKGS[79.9663]SETETEPPVALAPGPAPTR	K	C	15	45	31	3	12S(79.9663),5S(79.9663),8S(79.9663)	sp|P11474-2|ERR1_HUMAN	P11474-2	ERR1_HUMAN	ESRRA	Isoform 2 of Steroid hormone receptor ERR1		sp|P11474|ERR1_HUMAN	2	1.1359431E7	MS/MS	STY:79.9663@AEPAS(0.8802)PDS(0.8802)PKGS(0.8796)S(0.0945)ET(0.0945)ET(0.0945)EPPVALAPGPAPT(0.0765)R;
AEQGSEEEGEGEEEEEEGGESK	AEQGS[79.9663]EEEGEGEEEEEEGGESK	K	A	224	245	22	3	5S(79.9663)	sp|Q8NE71|ABCF1_HUMAN	Q8NE71	ABCF1_HUMAN	ABCF1	ATP-binding cassette sub-family F member 1			1	0	MS/MS	STY:79.9663@AEQGS(0.8841)EEEGEGEEEEEEGGES(0.1159)K;
AEQPSPPNSDSGQDAHPDPDANPDAAR	AEQPS[79.9663]PPNSDS[79.9663]GQDAHPDPDANPDAAR	R	M	144	170	27	3	11S(79.9663),5S(79.9663)	sp|Q9BUA3|SPNDC_HUMAN	Q9BUA3	SPNDC_HUMAN	SPINDOC	Spindlin interactor and repressor of chromatin-binding protein			1	8.38067e+06	MS/MS	STY:79.9663@AEQPS(0.7709)PPNS(0.4620)DS(0.7671)GQDAHPDPDANPDAAR;
AESPESSAIESTQSTPQK	AESPESSAIES[79.9663]T[79.9663]QSTPQK	R	G	1356	1373	18	2	11S(79.9663),12T(79.9663)	sp|Q9NTI5-2|PDS5B_HUMAN	Q9NTI5-2	PDS5B_HUMAN	PDS5B	Isoform 2 of Sister chromatid cohesion protein PDS5 homolog B		sp|Q9NTI5|PDS5B_HUMAN	1	0	MS/MS	STY:79.9663@AES(0.0326)PES(0.0326)S(0.0326)AIES(0.4755)T(0.4755)QS(0.4755)T(0.4755)PQK;
AESPESSAIESTQSTPQK	AESPES[79.9663]SAIESTQSTPQK	R	G	1356	1373	18	2	6S(79.9663)	sp|Q9NTI5-2|PDS5B_HUMAN	Q9NTI5-2	PDS5B_HUMAN	PDS5B	Isoform 2 of Sister chromatid cohesion protein PDS5 homolog B		sp|Q9NTI5|PDS5B_HUMAN	1	2.9940076E7	MS/MS	STY:79.9663@AES(0.0251)PES(0.9216)S(0.0112)AIES(0.0105)T(0.0105)QS(0.0105)T(0.0105)PQK;
AESSSGGGTVPSSAGILEQGPSPGDGSPPKPK	AESSSGGGTVPSSAGILEQGPSPGDGS[79.9663]PPKPK	R	D	276	307	32	3	27S(79.9663)	sp|Q68EM7-3|RHG17_HUMAN	Q68EM7-3	RHG17_HUMAN	ARHGAP17	Isoform 3 of Rho GTPase-activating protein 17		sp|Q68EM7-5|RHG17_HUMAN, sp|Q68EM7-6|RHG17_HUMAN, sp|Q68EM7-7|RHG17_HUMAN, sp|Q68EM7|RHG17_HUMAN	3	2.1647876E7	MS/MS	STY:79.9663@AES(0.0204)S(0.0204)S(0.0204)GGGT(0.0124)VPS(0.0158)S(0.0158)AGILEQGPS(0.0102)PGDGS(0.8845)PPKPK;
AESSSGGGTVPSSAGILEQGPSPGDGSPPKPK	AESSSGGGTVPSSAGILEQGPS[79.9663]PGDGSPPKPK	R	D	276	307	32	3	22S(79.9663)	sp|Q68EM7-3|RHG17_HUMAN	Q68EM7-3	RHG17_HUMAN	ARHGAP17	Isoform 3 of Rho GTPase-activating protein 17		sp|Q68EM7-5|RHG17_HUMAN, sp|Q68EM7-6|RHG17_HUMAN, sp|Q68EM7-7|RHG17_HUMAN, sp|Q68EM7|RHG17_HUMAN	2	1.6695241E7	MS/MS	STY:79.9663@AES(0.0123)S(0.0123)S(0.0151)GGGT(0.0151)VPS(0.0097)S(0.0097)AGILEQGPS(0.4629)PGDGS(0.4629)PPKPK;
AESPEEVACR	AES[79.9663]PEEVAC[57.0215]R	R	K	1393	1402	10	2	3S(79.9663),9C(57.0215)	sp|Q7Z6Z7-2|HUWE1_HUMAN	Q7Z6Z7-2	HUWE1_HUMAN	HUWE1	Isoform 2 of E3 ubiquitin-protein ligase HUWE1		sp|Q7Z6Z7-3|HUWE1_HUMAN, sp|Q7Z6Z7|HUWE1_HUMAN	1	1.85067e+06	MS/MS	STY:79.9663@AES(1.0000)PEEVACR;
AESPESSAIESTQSTPQK	AES[79.9663]PESSAIESTQSTPQK	R	G	1356	1373	18	2,3	3S(79.9663)	sp|Q9NTI5-2|PDS5B_HUMAN	Q9NTI5-2	PDS5B_HUMAN	PDS5B	Isoform 2 of Sister chromatid cohesion protein PDS5 homolog B		sp|Q9NTI5|PDS5B_HUMAN	5	2.9433928E7	MS/MS	STY:79.9663@AES(0.9335)PES(0.0140)S(0.0109)AIES(0.0105)T(0.0105)QS(0.0104)T(0.0104)PQK;
AESPESSAIESTQSTPQK	AES[79.9663]PESSAIEST[79.9663]QSTPQK	R	G	1356	1373	18	2	12T(79.9663),3S(79.9663)	sp|Q9NTI5-2|PDS5B_HUMAN	Q9NTI5-2	PDS5B_HUMAN	PDS5B	Isoform 2 of Sister chromatid cohesion protein PDS5 homolog B		sp|Q9NTI5|PDS5B_HUMAN	1	0	MS/MS	STY:79.9663@AES(0.5625)PES(0.5625)S(0.0349)AIES(0.0362)T(0.6787)QS(0.0754)T(0.0497)PQK;
AESPSPAPPPGLR	AES[79.9663]PSPAPPPGLR	R	G	306	318	13	2	3S(79.9663)	sp|Q9BUA3|SPNDC_HUMAN	Q9BUA3	SPNDC_HUMAN	SPINDOC	Spindlin interactor and repressor of chromatin-binding protein			1	2.2969e+06	MS/MS	STY:79.9663@AES(0.5000)PS(0.5000)PAPPPGLR;
AESSDSGAESEEEEAQEEVK	AES[79.9663]SDSGAES[79.9663]EEEEAQEEVK	K	G	147	166	20	2	10S(79.9663),3S(79.9663)	sp|Q5T8D3-2|ACBD5_HUMAN	Q5T8D3-2	ACBD5_HUMAN	ACBD5	Isoform 2 of Acyl-CoA-binding domain-containing protein 5		sp|Q5T8D3-3|ACBD5_HUMAN, sp|Q5T8D3-4|ACBD5_HUMAN, sp|Q5T8D3|ACBD5_HUMAN	1	0	MS/MS	STY:79.9663@AES(0.4894)S(0.4894)DS(0.4894)GAES(0.5318)EEEEAQEEVK;
AETASQSQRSPISDNSGCDAPGNSNPSLSVPSSAESEK	AETAS[79.9663]QSQRSPISDNSGC[57.0215]DAPGNSNPSLSVPSSAESEK	R	Q	14	51	38	3	18C(57.0215),5S(79.9663)	sp|Q99590-2|SCAFB_HUMAN	Q99590-2	SCAFB_HUMAN	SCAF11	Isoform 2 of Protein SCAF11		sp|Q99590|SCAFB_HUMAN	1	0	MS/MS	STY:79.9663@AET(0.0915)AS(0.3410)QS(0.3410)QRS(0.0661)PIS(0.0661)DNS(0.0661)GCDAPGNS(0.0054)NPS(0.0052)LS(0.0052)VPS(0.0042)S(0.0042)AES(0.0042)EK;
AETPTESVSEPEVATK	AET[79.9663]PTESVSEPEVATK	K	Q	193	208	16	2	3T(79.9663)	sp|P18858-2|DNLI1_HUMAN	P18858-2	DNLI1_HUMAN	LIG1	Isoform 2 of DNA ligase 1		sp|P18858-3|DNLI1_HUMAN, sp|P18858|DNLI1_HUMAN	1	0	MS/MS	STY:79.9663@AET(0.2000)PT(0.2000)ES(0.2000)VS(0.2000)EPEVAT(0.2000)K;
AEVYGSENESER	AEVY[79.9663]GSENESER	K	N	345	356	12	2	4Y(79.9663)	sp|Q9BVS4-2|RIOK2_HUMAN	Q9BVS4-2	RIOK2_HUMAN	RIOK2	Isoform 2 of Serine/threonine-protein kinase RIO2		sp|Q9BVS4|RIOK2_HUMAN	1	1.68188e+06	MS/MS	STY:79.9663@AEVY(0.3333)GS(0.3333)ENES(0.3333)ER;
AFGESSTESDEEEEEGCGHTHCVR	AFGES[79.9663]STES[79.9663]DEEEEEGC[57.0215]GHT[79.9663]HC[57.0215]VR	R	G	69	92	24	3	17C(57.0215),20T(79.9663),22C(57.0215),5S(79.9663),9S(79.9663)	sp|O60927|PP1RB_HUMAN	O60927	PP1RB_HUMAN	PPP1R11	E3 ubiquitin-protein ligase PPP1R11			1	0	MS/MS	STY:79.9663@AFGES(0.7821)S(0.3261)T(0.3261)ES(0.7828)DEEEEEGCGHT(0.7828)HCVR;
AFGESSTESDEEEEEGCGHTHCVR	AFGES[79.9663]S[79.9663]T[79.9663]ESDEEEEEGC[57.0215]GHTHC[57.0215]VR	R	G	69	92	24	3	17C(57.0215),22C(57.0215),5S(79.9663),6S(79.9663),7T(79.9663)	sp|O60927|PP1RB_HUMAN	O60927	PP1RB_HUMAN	PPP1R11	E3 ubiquitin-protein ligase PPP1R11			1	0	MS/MS	STY:79.9663@AFGES(0.6006)S(0.5998)T(0.5998)ES(0.5998)DEEEEEGCGHT(0.5998)HCVR;
AFGPGLQGGSAGSPAR	AFGPGLQGGSAGS[79.9663]PAR	K	F	1072	1087	16	2	13S(79.9663)	sp|P21333-2|FLNA_HUMAN	P21333-2	FLNA_HUMAN	FLNA	Isoform 2 of Filamin-A		sp|P21333|FLNA_HUMAN	2	3.1300284E7	MS/MS	STY:79.9663@AFGPGLQGGS(0.0774)AGS(0.9226)PAR;
AFGPGLQGGSAGSPAR	AFGPGLQGGS[79.9663]AGSPAR	K	F	1072	1087	16	2	10S(79.9663)	sp|P21333-2|FLNA_HUMAN	P21333-2	FLNA_HUMAN	FLNA	Isoform 2 of Filamin-A		sp|P21333|FLNA_HUMAN	3	3.1300284E7	MS/MS	STY:79.9663@AFGPGLQGGS(0.9056)AGS(0.0944)PAR;
AFVEDSEDEDGAGEGGSSLLQK	AFVEDSEDEDGAGEGGS[79.9663]SLLQK	R	R	166	187	22	2	17S(79.9663)	sp|Q8N9T8|KRI1_HUMAN	Q8N9T8	KRI1_HUMAN	KRI1	Protein KRI1 homolog			1	0	MS/MS	STY:79.9663@AFVEDS(0.1923)EDEDGAGEGGS(0.4039)S(0.4039)LLQK;
AFVEDSEDEDGAGEGGSSLLQK	AFVEDS[79.9663]EDEDGAGEGGSSLLQK	R	R	166	187	22	2,3	6S(79.9663)	sp|Q8N9T8|KRI1_HUMAN	Q8N9T8	KRI1_HUMAN	KRI1	Protein KRI1 homolog			2	0	MS/MS	STY:79.9663@AFVEDS(0.9019)EDEDGAGEGGS(0.0490)S(0.0490)LLQK;
AGAAAGDSDEESRADDK	AGAAAGDS[79.9663]DEESRADDK	R	G	330	346	17	2	8S(79.9663)	sp|O95365|ZBT7A_HUMAN	O95365	ZBT7A_HUMAN	ZBTB7A	Zinc finger and BTB domain-containing protein 7A			1	0	MS/MS	STY:79.9663@AGAAAGDS(0.7169)DEES(0.2831)RADDK;
AGDLLEDSPK	AGDLLEDS[79.9663]PK	R	R	158	167	10	2	8S(79.9663)	sp|P51858|HDGF_HUMAN	P51858	HDGF_HUMAN	HDGF	Hepatoma-derived growth factor		sp|P51858-2|HDGF_HUMAN, sp|P51858-3|HDGF_HUMAN	11	1.14202272E8	MS/MS	STY:79.9663@AGDLLEDS(1.0000)PK;
AGDLLEDSPKRPK	AGDLLEDS[79.9663]PKRPK	R	E	158	170	13	2,3	8S(79.9663)	sp|P51858|HDGF_HUMAN	P51858	HDGF_HUMAN	HDGF	Hepatoma-derived growth factor		sp|P51858-2|HDGF_HUMAN, sp|P51858-3|HDGF_HUMAN	10	1.11217376E8	MS/MS	STY:79.9663@AGDLLEDS(1.0000)PKRPK;
AGDNIPEEQPVASTPTTVSDGENKK	AGDNIPEEQPVAS[79.9663]TPTTVSDGENKK	K	D	232	256	25	3	13S(79.9663)	sp|Q9Y320-2|TMX2_HUMAN	Q9Y320-2	TMX2_HUMAN	TMX2	Isoform 2 of Thioredoxin-related transmembrane protein 2		sp|Q9Y320|TMX2_HUMAN	1	0	MS/MS	STY:79.9663@AGDNIPEEQPVAS(0.9313)T(0.0172)PT(0.0172)T(0.0172)VS(0.0172)DGENKK;
AGDPGEMPQSPTGLGQPK	AGDPGEMPQS[79.9663]PTGLGQPK	R	R	1361	1378	18	2	10S(79.9663)	sp|Q9UIF9-2|BAZ2A_HUMAN	Q9UIF9-2	BAZ2A_HUMAN	BAZ2A	Isoform 1 of Bromodomain adjacent to zinc finger domain protein 2A		sp|Q9UIF9-3|BAZ2A_HUMAN, sp|Q9UIF9|BAZ2A_HUMAN	1	2.43625e+06	MS/MS	STY:79.9663@AGDPGEMPQS(0.5000)PT(0.5000)GLGQPK;
AGEEDEGEEDSDSDYEISAK	AGEEDEGEEDS[79.9663]DSDYEISAK	R	A	463	482	20	2	11S(79.9663)	sp|A2RRP1-2|NBAS_HUMAN	A2RRP1-2	NBAS_HUMAN	NBAS	Isoform 2 of NBAS subunit of NRZ tethering complex		sp|A2RRP1|NBAS_HUMAN	1	0	MS/MS	STY:79.9663@AGEEDEGEEDS(0.8159)DS(0.0614)DY(0.0614)EIS(0.0614)AK;
AGEPNSPDAEEANSPDVTAGCDPAGVHPPR	AGEPNSPDAEEANSPDVT[79.9663]AGC[57.0215]DPAGVHPPR	R	-	738	767	30	3	18T(79.9663),21C(57.0215)	sp|Q08J23|NSUN2_HUMAN	Q08J23	NSUN2_HUMAN	NSUN2	RNA cytosine C(5)-methyltransferase NSUN2		sp|Q08J23-2|NSUN2_HUMAN, sp|Q08J23-3|NSUN2_HUMAN	2	0	MS/MS	STY:79.9663@AGEPNS(0.0376)PDAEEANS(0.1023)PDVT(0.8602)AGCDPAGVHPPR;
AGEPNSPDAEEANSPDVTAGCDPAGVHPPR	AGEPNSPDAEEANS[79.9663]PDVTAGC[57.0215]DPAGVHPPR	R	-	738	767	30	3	14S(79.9663),21C(57.0215)	sp|Q08J23|NSUN2_HUMAN	Q08J23	NSUN2_HUMAN	NSUN2	RNA cytosine C(5)-methyltransferase NSUN2		sp|Q08J23-2|NSUN2_HUMAN, sp|Q08J23-3|NSUN2_HUMAN	4	1.22532368E8	MS/MS	STY:79.9663@AGEPNS(0.0398)PDAEEANS(0.9287)PDVT(0.0315)AGCDPAGVHPPR;
AGEPNSPDAEEANSPDVTAGCDPAGVHPPR	AGEPNSPDAEEANS[79.9663]PDVT[79.9663]AGC[57.0215]DPAGVHPPR	R	-	738	767	30	3	14S(79.9663),18T(79.9663),21C(57.0215)	sp|Q08J23|NSUN2_HUMAN	Q08J23	NSUN2_HUMAN	NSUN2	RNA cytosine C(5)-methyltransferase NSUN2		sp|Q08J23-2|NSUN2_HUMAN, sp|Q08J23-3|NSUN2_HUMAN	9	6.4586515E8	MS/MS	STY:79.9663@AGEPNS(0.1852)PDAEEANS(0.9074)PDVT(0.9074)AGCDPAGVHPPR;
AGEPNSPDAEEANSPDVTAGCDPAGVHPPR	AGEPNS[79.9663]PDAEEANSPDVTAGC[57.0215]DPAGVHPPR	R	-	738	767	30	3,4	21C(57.0215),6S(79.9663)	sp|Q08J23|NSUN2_HUMAN	Q08J23	NSUN2_HUMAN	NSUN2	RNA cytosine C(5)-methyltransferase NSUN2		sp|Q08J23-2|NSUN2_HUMAN, sp|Q08J23-3|NSUN2_HUMAN	10	1.46471296E8	MS/MS	STY:79.9663@AGEPNS(0.8992)PDAEEANS(0.0605)PDVT(0.0403)AGCDPAGVHPPR;
AGEPNSPDAEEANSPDVTAGCDPAGVHPPR	AGEPNS[79.9663]PDAEEANSPDVT[79.9663]AGC[57.0215]DPAGVHPPR	R	-	738	767	30	3,4	18T(79.9663),21C(57.0215),6S(79.9663)	sp|Q08J23|NSUN2_HUMAN	Q08J23	NSUN2_HUMAN	NSUN2	RNA cytosine C(5)-methyltransferase NSUN2		sp|Q08J23-2|NSUN2_HUMAN, sp|Q08J23-3|NSUN2_HUMAN	3	0	MS/MS	STY:79.9663@AGEPNS(0.7340)PDAEEANS(0.5277)PDVT(0.7383)AGCDPAGVHPPR;
AGEPNSPDAEEANSPDVTAGCDPAGVHPPR	AGEPNS[79.9663]PDAEEANS[79.9663]PDVTAGC[57.0215]DPAGVHPPR	R	-	738	767	30	3,4,5	14S(79.9663),21C(57.0215),6S(79.9663)	sp|Q08J23|NSUN2_HUMAN	Q08J23	NSUN2_HUMAN	NSUN2	RNA cytosine C(5)-methyltransferase NSUN2		sp|Q08J23-2|NSUN2_HUMAN, sp|Q08J23-3|NSUN2_HUMAN	26	6.737161E8	MS/MS	STY:79.9663@AGEPNS(0.9444)PDAEEANS(0.9444)PDVT(0.1112)AGCDPAGVHPPR;
AGEQQLSEPEDMEMEAGDTDDPPR	AGEQQLS[79.9663]EPEDMEMEAGDTDDPPR	K	I	12	35	24	3	7S(79.9663)	sp|Q93009|UBP7_HUMAN	Q93009	UBP7_HUMAN	USP7	Ubiquitin carboxyl-terminal hydrolase 7			1	1.9241558E7	MS/MS	STY:79.9663@AGEQQLS(0.9407)EPEDMEMEAGDT(0.0593)DDPPR;
AGEQQLSEPEDMEMEAGDTDDPPR	AGEQQLS[79.9663]EPEDMEM[15.9949]EAGDTDDPPR	K	I	12	35	24	3	14M(15.9949),7S(79.9663)	sp|Q93009|UBP7_HUMAN	Q93009	UBP7_HUMAN	USP7	Ubiquitin carboxyl-terminal hydrolase 7			1	2115881	MS/MS	STY:79.9663@AGEQQLS(0.9043)EPEDMEMEAGDT(0.0957)DDPPR;M:15.9949@AGEQQLSEPEDM(0.2033)EM(0.7967)EAGDTDDPPR;
AGEQQLSEPEDMEMEAGDTDDPPR	AGEQQLS[79.9663]EPEDM[15.9949]EMEAGDTDDPPR	K	I	12	35	24	3	12M(15.9949),7S(79.9663)	sp|Q93009|UBP7_HUMAN	Q93009	UBP7_HUMAN	USP7	Ubiquitin carboxyl-terminal hydrolase 7			2	3.41512e+06	MS/MS	STY:79.9663@AGEQQLS(0.8780)EPEDMEMEAGDT(0.1220)DDPPR;M:15.9949@AGEQQLSEPEDM(0.9146)EM(0.0854)EAGDTDDPPR;
AGETRFTDTR	AGET[79.9663]RFTDTR	R	K	51	60	10	2	4T(79.9663)	sp|P13639|EF2_HUMAN	P13639	EF2_HUMAN	EEF2	Elongation factor 2			2	1.045735E7	MS/MS	STY:79.9663@AGET(0.4864)RFT(0.4864)DT(0.0273)R;
AGGASPAASSTAQPPTQHR	AGGAS[79.9663]PAASSTAQPPTQHR	R	L	449	467	19	2	5S(79.9663)	sp|Q8IU81|I2BP1_HUMAN	Q8IU81	I2BP1_HUMAN	IRF2BP1	Interferon regulatory factor 2-binding protein 1			1	0	MS/MS	STY:79.9663@AGGAS(0.9072)PAAS(0.0239)S(0.0239)T(0.0239)AQPPT(0.0212)QHR;
AGGPTTPLSPTR	AGGPTTPLS[79.9663]PT[79.9663]R	R	L	15	26	12	2	11T(79.9663),9S(79.9663)	sp|P20700|LMNB1_HUMAN	P20700	LMNB1_HUMAN	LMNB1	Lamin-B1			1	1.0090077E7	MS/MS	STY:79.9663@AGGPT(0.0904)T(0.0904)PLS(0.9096)PT(0.9096)R;
AGGPTTPLSPTR	AGGPT[79.9663]T[79.9663]PLSPTR	R	L	15	26	12	2	5T(79.9663),6T(79.9663)	sp|P20700|LMNB1_HUMAN	P20700	LMNB1_HUMAN	LMNB1	Lamin-B1			1	1.0090077E7	MS/MS	STY:79.9663@AGGPT(0.5000)T(0.5000)PLS(0.5000)PT(0.5000)R;
AGGSAALSPSK	AGGSAALSPS[79.9663]K	K	K	24	34	11	2	10S(79.9663)	sp|Q92522|H1X_HUMAN	Q92522	H1X_HUMAN	H1-10	Histone H1.10			2	2.039121E7	MS/MS	STY:79.9663@AGGS(0.0312)AALS(0.1904)PS(0.7783)K;
AGGSAALSPSK	AGGSAALS[79.9663]PSK	K	K	24	34	11	2	8S(79.9663)	sp|Q92522|H1X_HUMAN	Q92522	H1X_HUMAN	H1-10	Histone H1.10			3	2.9101792E7	MS/MS	STY:79.9663@AGGS(0.0253)AALS(0.4873)PS(0.4873)K;
AGGSAALSPSK	AGGS[79.9663]AALSPSK	K	K	24	34	11	2	4S(79.9663)	sp|Q92522|H1X_HUMAN	Q92522	H1X_HUMAN	H1-10	Histone H1.10			2	2.9101792E7	MS/MS	STY:79.9663@AGGS(0.3333)AALS(0.3333)PS(0.3333)K;
AGHDGDSDGDSDDEEGYFICPITDDPSSNQNVNSK	AGHDGDS[79.9663]DGDS[79.9663]DDEEGYFIC[57.0215]PITDDPSSNQNVNSK	R	V	21	55	35	3	11S(79.9663),20C(57.0215),7S(79.9663)	sp|O00418|EF2K_HUMAN	O00418	EF2K_HUMAN	EEF2K	Eukaryotic elongation factor 2 kinase			1	1.6496012E7	MS/MS	STY:79.9663@AGHDGDS(0.3191)DGDS(0.3191)DDEEGY(0.3191)FICPIT(0.3191)DDPS(0.3191)S(0.3191)NQNVNS(0.0851)K;
AGLESGAEPGDGDSDTTK	AGLESGAEPGDGDSDT[79.9663]TK	K	K	481	498	18	2	16T(79.9663)	sp|O60832|DKC1_HUMAN	O60832	DKC1_HUMAN	DKC1	H/ACA ribonucleoprotein complex subunit DKC1			2	5.9621904E7	MS/MS	STY:79.9663@AGLES(0.0135)GAEPGDGDS(0.0185)DT(0.4840)T(0.4840)K;
AGLESGAEPGDGDSDTTK	AGLESGAEPGDGDS[79.9663]DTTK	K	K	481	498	18	2	14S(79.9663)	sp|O60832|DKC1_HUMAN	O60832	DKC1_HUMAN	DKC1	H/ACA ribonucleoprotein complex subunit DKC1			4	5.9621904E7	MS/MS	STY:79.9663@AGLES(0.0094)GAEPGDGDS(0.3302)DT(0.3302)T(0.3302)K;
AGLESGAEPGDGDSDTTKK	AGLESGAEPGDGDS[79.9663]DTTKK	K	K	481	499	19	3	14S(79.9663)	sp|O60832|DKC1_HUMAN	O60832	DKC1_HUMAN	DKC1	H/ACA ribonucleoprotein complex subunit DKC1			2	4234371	MS/MS	STY:79.9663@AGLES(0.0106)GAEPGDGDS(0.3298)DT(0.3298)T(0.3298)KK;
AGLESGAEPGDGDSDTTK	AGLESGAEPGDGDS[79.9663]DT[79.9663]TK	K	K	481	498	18	2	14S(79.9663),16T(79.9663)	sp|O60832|DKC1_HUMAN	O60832	DKC1_HUMAN	DKC1	H/ACA ribonucleoprotein complex subunit DKC1			1	1.6624709E7	MS/MS	STY:79.9663@AGLES(0.3085)GAEPGDGDS(0.8000)DT(0.8000)T(0.0915)K;
AGLESGAEPGDGDSDTTK	AGLES[79.9663]GAEPGDGDSDTTK	K	K	481	498	18	2	5S(79.9663)	sp|O60832|DKC1_HUMAN	O60832	DKC1_HUMAN	DKC1	H/ACA ribonucleoprotein complex subunit DKC1			1	3.5204532E7	MS/MS	STY:79.9663@AGLES(0.2500)GAEPGDGDS(0.2500)DT(0.2500)T(0.2500)K;
AGLESGAEPGDGDSDTTKK	AGLES[79.9663]GAEPGDGDSDTTKK	K	K	481	499	19	2	5S(79.9663)	sp|O60832|DKC1_HUMAN	O60832	DKC1_HUMAN	DKC1	H/ACA ribonucleoprotein complex subunit DKC1			1	0	MS/MS	STY:79.9663@AGLES(0.2500)GAEPGDGDS(0.2500)DT(0.2500)T(0.2500)KK;
AGLESGAEPGDGDSDTTK	AGLES[79.9663]GAEPGDGDS[79.9663]DTTK	K	K	481	498	18	2	14S(79.9663),5S(79.9663)	sp|O60832|DKC1_HUMAN	O60832	DKC1_HUMAN	DKC1	H/ACA ribonucleoprotein complex subunit DKC1			1	1.6098719E7	MS/MS	STY:79.9663@AGLES(0.5324)GAEPGDGDS(0.4892)DT(0.4892)T(0.4892)K;
AGLESGAEPGDGDSDTTKK	AGLES[79.9663]GAEPGDGDS[79.9663]DTTKK	K	K	481	499	19	2	14S(79.9663),5S(79.9663)	sp|O60832|DKC1_HUMAN	O60832	DKC1_HUMAN	DKC1	H/ACA ribonucleoprotein complex subunit DKC1			1	0	MS/MS	STY:79.9663@AGLES(0.5306)GAEPGDGDS(0.4898)DT(0.4898)T(0.4898)KK;
AGLGSPERPPKTSPGSPR	AGLGSPERPPKTS[79.9663]PGS[79.9663]PR	R	L	54	71	18	3	13S(79.9663),16S(79.9663)	sp|Q9H6F5|CCD86_HUMAN	Q9H6F5	CCD86_HUMAN	CCDC86	Coiled-coil domain-containing protein 86			1	2.3981024E7	MS/MS	STY:79.9663@AGLGS(0.1176)PERPPKT(0.1176)S(0.8824)PGS(0.8824)PR;
AGLGSPERPPKTSPGSPR	AGLGSPERPPKT[79.9663]SPGS[79.9663]PR	R	L	54	71	18	3	12T(79.9663),16S(79.9663)	sp|Q9H6F5|CCD86_HUMAN	Q9H6F5	CCD86_HUMAN	CCDC86	Coiled-coil domain-containing protein 86			1	2.391731E7	MS/MS	STY:79.9663@AGLGS(0.0626)PERPPKT(0.9297)S(0.0813)PGS(0.9264)PR;
AGLGSPERPPKTSPGSPR	AGLGS[79.9663]PERPPKTS[79.9663]PGS[79.9663]PR	R	L	54	71	18	3	13S(79.9663),16S(79.9663),5S(79.9663)	sp|Q9H6F5|CCD86_HUMAN	Q9H6F5	CCD86_HUMAN	CCDC86	Coiled-coil domain-containing protein 86			1	2.0873812E7	MS/MS	STY:79.9663@AGLGS(0.7880)PERPPKT(0.6295)S(0.7917)PGS(0.7908)PR;
AGLGSPERPPKTSPGSPR	AGLGS[79.9663]PERPPKT[79.9663]SPGSPR	R	L	54	71	18	2,3	12T(79.9663),5S(79.9663)	sp|Q9H6F5|CCD86_HUMAN	Q9H6F5	CCD86_HUMAN	CCDC86	Coiled-coil domain-containing protein 86			2	3.5863216E7	MS/MS	STY:79.9663@AGLGS(0.8243)PERPPKT(0.8243)S(0.1757)PGS(0.1757)PR;
AGLGSPERPPKTSPGSPR	AGLGS[79.9663]PERPPKT[79.9663]S[79.9663]PGSPR	R	L	54	71	18	3	12T(79.9663),13S(79.9663),5S(79.9663)	sp|Q9H6F5|CCD86_HUMAN	Q9H6F5	CCD86_HUMAN	CCDC86	Coiled-coil domain-containing protein 86			1	2.0901338E7	MS/MS	STY:79.9663@AGLGS(0.7646)PERPPKT(0.7451)S(0.7451)PGS(0.7451)PR;
AGMSSNQSISSPVLDAVPR	AGMSSNQSIS[79.9663]SPVLDAVPR	K	T	1394	1412	19	2	10S(79.9663)	sp|Q9UQ35|SRRM2_HUMAN	Q9UQ35	SRRM2_HUMAN	SRRM2	Serine/arginine repetitive matrix protein 2		sp|Q9UQ35-2|SRRM2_HUMAN	1	0	MS/MS	STY:79.9663@AGMS(0.0123)S(0.0123)NQS(0.0138)IS(0.4808)S(0.4808)PVLDAVPR;
AGMSSNQSISSPVLDAVPR	AGMSSNQS[79.9663]ISSPVLDAVPR	K	T	1394	1412	19	2	8S(79.9663)	sp|Q9UQ35|SRRM2_HUMAN	Q9UQ35	SRRM2_HUMAN	SRRM2	Serine/arginine repetitive matrix protein 2		sp|Q9UQ35-2|SRRM2_HUMAN	1	5280716	MS/MS	STY:79.9663@AGMS(0.0625)S(0.0625)NQS(0.2917)IS(0.2917)S(0.2917)PVLDAVPR;
AGPDLPSLPSHALEDEGWAAAAPSPGSAR	AGPDLPSLPSHALEDEGWAAAAPSPGS[79.9663]AR	K	S	199	227	29	3	27S(79.9663)	sp|Q9H3Q1-2|BORG4_HUMAN	Q9H3Q1-2	BORG4_HUMAN	CDC42EP4	Isoform 2 of Cdc42 effector protein 4		sp|Q9H3Q1|BORG4_HUMAN	1	9387768	MS/MS	STY:79.9663@AGPDLPS(0.0348)LPS(0.0251)HALEDEGWAAAAPS(0.0371)PGS(0.9030)AR;
AGPPAPAPPAPIPPPAPSQSSPPEQPQSMEMR	AGPPAPAPPAPIPPPAPS[79.9663]QSSPPEQPQSMEMR	R	S	577	608	32	3	18S(79.9663)	sp|Q8WUF5|IASPP_HUMAN	Q8WUF5	IASPP_HUMAN	PPP1R13L	RelA-associated inhibitor			1	1.86601e+06	MS/MS	STY:79.9663@AGPPAPAPPAPIPPPAPS(0.2500)QS(0.2500)S(0.2500)PPEQPQS(0.2500)MEMR;
AGPTLTDENGDDLGLPPSPGDTSYYQDQVDDFHEAR	AGPTLTDENGDDLGLPPS[79.9663]PGDTSYYQDQVDDFHEAR	K	S	20	55	36	3	18S(79.9663)	sp|Q9NQZ2|SAS10_HUMAN	Q9NQZ2	SAS10_HUMAN	UTP3	Something about silencing protein 10			2	3.395572E7	MS/MS	STY:79.9663@AGPT(0.0128)LT(0.0128)DENGDDLGLPPS(0.8834)PGDT(0.0143)S(0.0143)Y(0.0143)Y(0.0481)QDQVDDFHEAR;
AGPTLTDENGDDLGLPPSPGDTSYYQDQVDDFHEAR	AGPT[79.9663]LTDENGDDLGLPPSPGDTSYYQDQVDDFHEAR	K	S	20	55	36	4	4T(79.9663)	sp|Q9NQZ2|SAS10_HUMAN	Q9NQZ2	SAS10_HUMAN	UTP3	Something about silencing protein 10			1	7104969	MS/MS	STY:79.9663@AGPT(0.4698)LT(0.4698)DENGDDLGLPPS(0.0143)PGDT(0.0115)S(0.0115)Y(0.0115)Y(0.0115)QDQVDDFHEAR;
AGSNEDPILAPSGTPPPTIPPDETFGGR	AGSNEDPILAPS[79.9663]GTPPPTIPPDETFGGR	R	V	732	759	28	3	12S(79.9663)	sp|Q8IZL8|PELP1_HUMAN	Q8IZL8	PELP1_HUMAN	PELP1	Proline-, glutamic acid- and leucine-rich protein 1			3	2.8160432E7	MS/MS	STY:79.9663@AGS(0.0291)NEDPILAPS(0.4736)GT(0.4736)PPPT(0.0115)IPPDET(0.0122)FGGR;
AGSSAAGASGWTSAGSLNSVPTNSAQQGHNSPDSPVTSAAK	AGSSAAGASGWTSAGSLNSVPTNSAQQGHNSPDSPVTS[79.9663]AAK	K	G	721	761	41	3	38S(79.9663)	sp|Q86XP3|DDX42_HUMAN	Q86XP3	DDX42_HUMAN	DDX42	ATP-dependent RNA helicase DDX42		sp|Q86XP3-2|DDX42_HUMAN	1	0	MS/MS	STY:79.9663@AGS(0.0387)S(0.0387)AAGAS(0.0165)GWT(0.0165)S(0.0165)AGS(0.0067)LNS(0.0067)VPT(0.0067)NS(0.0071)AQQGHNS(0.0654)PDS(0.0654)PVT(0.0654)S(0.6497)AAK;
AGSNEDPILAPSGTPPPTIPPDETFGGR	AGS[79.9663]NEDPILAPSGTPPPTIPPDETFGGR	R	V	732	759	28	3	3S(79.9663)	sp|Q8IZL8|PELP1_HUMAN	Q8IZL8	PELP1_HUMAN	PELP1	Proline-, glutamic acid- and leucine-rich protein 1			1	1.8666806E7	MS/MS	STY:79.9663@AGS(0.2483)NEDPILAPS(0.2483)GT(0.2483)PPPT(0.2483)IPPDET(0.0067)FGGR;
AGSSAAGASGWTSAGSLNSVPTNSAQQGHNSPDSPVTSAAK	AGS[79.9663]SAAGASGWTSAGSLNSVPTNSAQQGHNSPDSPVTSAAK	K	G	721	761	41	3	3S(79.9663)	sp|Q86XP3|DDX42_HUMAN	Q86XP3	DDX42_HUMAN	DDX42	ATP-dependent RNA helicase DDX42		sp|Q86XP3-2|DDX42_HUMAN	1	0	MS/MS	STY:79.9663@AGS(0.2163)S(0.2163)AAGAS(0.0074)GWT(0.0074)S(0.0074)AGS(0.0074)LNS(0.0074)VPT(0.0074)NS(0.1046)AQQGHNS(0.1046)PDS(0.1046)PVT(0.1046)S(0.1046)AAK;
AHFNAMFQPSSPTR	AHFNAMFQPS[79.9663]SPTR	R	R	883	896	14	2	10S(79.9663)	sp|Q8WUA4|TF3C2_HUMAN	Q8WUA4	TF3C2_HUMAN	GTF3C2	General transcription factor 3C polypeptide 2			2	2.70596e+06	MS/MS	STY:79.9663@AHFNAMFQPS(0.3333)S(0.3333)PT(0.3333)R;
AHSLMELSPSAPPGGSPHLDSSR	AHSLMELSPSAPPGGS[79.9663]PHLDSSR	K	S	593	615	23	3	16S(79.9663)	sp|Q13586|STIM1_HUMAN	Q13586	STIM1_HUMAN	STIM1	Stromal interaction molecule 1			1	1.53609e+06	MS/MS	STY:79.9663@AHS(0.0174)LMELS(0.0131)PS(0.0131)APPGGS(0.3188)PHLDS(0.3188)S(0.3188)R;
AHSSPASLQLGAVSPGTLTPTGVVSGPAATPTAQHLR	AHSSPASLQLGAVSPGTLT[79.9663]PTGVVSGPAATPTAQHLR	R	Q	125	161	37	4	19T(79.9663)	sp|P46937-2|YAP1_HUMAN	P46937-2	YAP1_HUMAN	YAP1	Isoform 2 of Transcriptional coactivator YAP1		sp|P46937-3|YAP1_HUMAN, sp|P46937-5|YAP1_HUMAN, sp|P46937-6|YAP1_HUMAN, sp|P46937-7|YAP1_HUMAN, sp|P46937-8|YAP1_HUMAN, sp|P46937-9|YAP1_HUMAN, sp|P46937|YAP1_HUMAN	1	0	MS/MS	STY:79.9663@AHS(0.0932)S(0.0932)PAS(0.0932)LQLGAVS(0.0326)PGT(0.0174)LT(0.3123)PT(0.1722)GVVS(0.0926)GPAAT(0.0289)PT(0.0644)AQHLR;
AHSSPASLQLGAVSPGTLTPTGVVSGPAATPTAQHLR	AHSSPASLQLGAVSPGT[79.9663]LTPTGVVSGPAATPTAQHLR	R	Q	125	161	37	3	17T(79.9663)	sp|P46937-2|YAP1_HUMAN	P46937-2	YAP1_HUMAN	YAP1	Isoform 2 of Transcriptional coactivator YAP1		sp|P46937-3|YAP1_HUMAN, sp|P46937-5|YAP1_HUMAN, sp|P46937-6|YAP1_HUMAN, sp|P46937-7|YAP1_HUMAN, sp|P46937-8|YAP1_HUMAN, sp|P46937-9|YAP1_HUMAN, sp|P46937|YAP1_HUMAN	1	0	MS/MS	STY:79.9663@AHS(0.0431)S(0.0431)PAS(0.0431)LQLGAVS(0.0055)PGT(0.3576)LT(0.3576)PT(0.0066)GVVS(0.0392)GPAAT(0.0522)PT(0.0522)AQHLR;
AHSSPASLQLGAVSPGTLTPTGVVSGPAATPTAQHLR	AHS[79.9663]S[79.9663]PASLQLGAVSPGTLTPTGVVSGPAATPTAQHLR	R	Q	125	161	37	3	3S(79.9663),4S(79.9663)	sp|P46937-2|YAP1_HUMAN	P46937-2	YAP1_HUMAN	YAP1	Isoform 2 of Transcriptional coactivator YAP1		sp|P46937-3|YAP1_HUMAN, sp|P46937-5|YAP1_HUMAN, sp|P46937-6|YAP1_HUMAN, sp|P46937-7|YAP1_HUMAN, sp|P46937-8|YAP1_HUMAN, sp|P46937-9|YAP1_HUMAN, sp|P46937|YAP1_HUMAN	1	0	MS/MS	STY:79.9663@AHS(0.3131)S(0.3131)PAS(0.3131)LQLGAVS(0.0407)PGT(0.0171)LT(0.0171)PT(0.2701)GVVS(0.2701)GPAAT(0.2229)PT(0.2229)AQHLR;
AHTPTPGIYMGR	AHT[79.9663]PTPGIYMGR	R	P	200	211	12	2	3T(79.9663)	sp|Q13595|TRA2A_HUMAN	Q13595	TRA2A_HUMAN	TRA2A	Transformer-2 protein homolog alpha		sp|Q13595-2|TRA2A_HUMAN, sp|Q13595-3|TRA2A_HUMAN, sp|Q13595-4|TRA2A_HUMAN	1	0	MS/MS	STY:79.9663@AHT(0.9296)PT(0.0352)PGIY(0.0352)MGR;
AHTPTPGIYMGRPTHSGGGGGGGGGGGGGGGGR	AHT[79.9663]PTPGIYMGRPTHSGGGGGGGGGGGGGGGGR	R	R	200	232	33	3	3T(79.9663)	sp|Q13595|TRA2A_HUMAN	Q13595	TRA2A_HUMAN	TRA2A	Transformer-2 protein homolog alpha		sp|Q13595-3|TRA2A_HUMAN, sp|Q13595-4|TRA2A_HUMAN	1	9362045	MS/MS	STY:79.9663@AHT(0.8437)PT(0.0391)PGIY(0.0391)MGRPT(0.0391)HS(0.0391)GGGGGGGGGGGGGGGGR;
AHTPTPGIYMGRPTHSGGGGGGGGGGGGGGGGR	AHT[79.9663]PTPGIYM[15.9949]GRPTHSGGGGGGGGGGGGGGGGR	R	R	200	232	33	4	10M(15.9949),3T(79.9663)	sp|Q13595|TRA2A_HUMAN	Q13595	TRA2A_HUMAN	TRA2A	Transformer-2 protein homolog alpha		sp|Q13595-3|TRA2A_HUMAN, sp|Q13595-4|TRA2A_HUMAN	1	6768370	MS/MS	STY:79.9663@AHT(0.4612)PT(0.4612)PGIY(0.0179)MGRPT(0.0161)HS(0.0437)GGGGGGGGGGGGGGGGR;M:15.9949@AHTPTPGIYM(1.0000)GRPTHSGGGGGGGGGGGGGGGGR;
AIGGIILTASHNPGGPNGDFGIK	AIGGIILT[79.9663]ASHNPGGPNGDFGIK	K	F	126	148	23	3	8T(79.9663)	sp|P36871-2|PGM1_HUMAN	P36871-2	PGM1_HUMAN	PGM1	Isoform 2 of Phosphoglucomutase-1		sp|P36871|PGM1_HUMAN	11	6.8560768E7	MS/MS	STY:79.9663@AIGGIILT(0.9216)AS(0.0784)HNPGGPNGDFGIK;
AIPGDQHPESPVHTEPMGIQGR	AIPGDQHPES[79.9663]PVHTEPMGIQGR	R	G	784	805	22	3	10S(79.9663)	sp|Q14676-3|MDC1_HUMAN	Q14676-3	MDC1_HUMAN	MDC1	Isoform 3 of Mediator of DNA damage checkpoint protein 1		sp|Q14676|MDC1_HUMAN	2	1.2582855E7	MS/MS	STY:79.9663@AIPGDQHPES(0.9006)PVHT(0.0994)EPMGIQGR;
AISSANLLVR	AIS[79.9663]SANLLVR	K	S	174	183	10	2	3S(79.9663)	sp|Q32P44-2|EMAL3_HUMAN	Q32P44-2	EMAL3_HUMAN	EML3	Isoform 2 of Echinoderm microtubule-associated protein-like 3		sp|Q32P44|EMAL3_HUMAN	1	0	MS/MS	STY:79.9663@AIS(0.5000)S(0.5000)ANLLVR;
AITSLLGGGSPK	AITSLLGGGS[79.9663]PK	K	N	2649	2660	12	2	10S(79.9663)	sp|Q6KC79-2|NIPBL_HUMAN	Q6KC79-2	NIPBL_HUMAN	NIPBL	Isoform 2 of Nipped-B-like protein		sp|Q6KC79|NIPBL_HUMAN	1	6.85795e+06	MS/MS	STY:79.9663@AIT(0.0511)S(0.0511)LLGGGS(0.8977)PK;
AITSLLGGGSPK	AITS[79.9663]LLGGGSPK	K	N	2649	2660	12	2	4S(79.9663)	sp|Q6KC79-2|NIPBL_HUMAN	Q6KC79-2	NIPBL_HUMAN	NIPBL	Isoform 2 of Nipped-B-like protein		sp|Q6KC79|NIPBL_HUMAN	1	6.85795e+06	MS/MS	STY:79.9663@AIT(0.0334)S(0.9290)LLGGGS(0.0376)PK;
AKPAMPQDSVPSPR	AKPAMPQDSVPS[79.9663]PR	K	S	470	483	14	2	12S(79.9663)	sp|P53396|ACLY_HUMAN	P53396	ACLY_HUMAN	ACLY	ATP-citrate synthase			1	1.73694E7	MS/MS	STY:79.9663@AKPAMPQDS(0.2072)VPS(0.7928)PR;
AKSEDSDVELSD	AKSEDS[79.9663]DVELS[79.9663]D	K	-	1448	1459	12	2	11S(79.9663),6S(79.9663)	sp|Q5VZL5-2|ZMYM4_HUMAN	Q5VZL5-2	ZMYM4_HUMAN	ZMYM4	Isoform 2 of Zinc finger MYM-type protein 4		sp|Q5VZL5-3|ZMYM4_HUMAN, sp|Q5VZL5-4|ZMYM4_HUMAN, sp|Q5VZL5|ZMYM4_HUMAN	1	0	MS/MS	STY:79.9663@AKS(0.1740)EDS(0.9128)DVELS(0.9132)D;
AKSPQPPVEEEDEHFDDTVVCLDTYNCDLHFK	AKSPQPPVEEEDEHFDDTVVC[57.0215]LDT[79.9663]YNC[57.0215]DLHFK	R	I	250	281	32	3,4	21C(57.0215),24T(79.9663),27C(57.0215)	sp|Q00839-2|HNRPU_HUMAN	Q00839-2	HNRPU_HUMAN	HNRNPU	Isoform 2 of Heterogeneous nuclear ribonucleoprotein U		sp|Q00839|HNRPU_HUMAN	2	0	MS/MS	STY:79.9663@AKS(0.0963)PQPPVEEEDEHFDDT(0.1711)VVCLDT(0.7152)Y(0.0174)NCDLHFK;
AKSPQPPVEEEDEHFDDTVVCLDTYNCDLHFK	AKSPQPPVEEEDEHFDDT[79.9663]VVC[57.0215]LDTYNC[57.0215]DLHFK	R	I	250	281	32	3,4	18T(79.9663),21C(57.0215),27C(57.0215)	sp|Q00839-2|HNRPU_HUMAN	Q00839-2	HNRPU_HUMAN	HNRNPU	Isoform 2 of Heterogeneous nuclear ribonucleoprotein U		sp|Q00839|HNRPU_HUMAN	11	6.262016E8	MS/MS	STY:79.9663@AKS(0.0664)PQPPVEEEDEHFDDT(0.8870)VVCLDT(0.0233)Y(0.0233)NCDLHFK;
AKSPQPPVEEEDEHFDDTVVCLDTYNCDLHFK	AKS[79.9663]PQPPVEEEDEHFDDTVVC[57.0215]LDTYNC[57.0215]DLHFK	R	I	250	281	32	3,4,5	21C(57.0215),27C(57.0215),3S(79.9663)	sp|Q00839-2|HNRPU_HUMAN	Q00839-2	HNRPU_HUMAN	HNRNPU	Isoform 2 of Heterogeneous nuclear ribonucleoprotein U		sp|Q00839|HNRPU_HUMAN	21	6.4292115E8	MS/MS	STY:79.9663@AKS(0.9329)PQPPVEEEDEHFDDT(0.0236)VVCLDT(0.0218)Y(0.0218)NCDLHFK;
AKSPTPDGSER	AKS[79.9663]PTPDGS[79.9663]ER	R	I	144	154	11	2	3S(79.9663),9S(79.9663)	sp|Q96MU7-2|YTDC1_HUMAN	Q96MU7-2	YTDC1_HUMAN	YTHDC1	Isoform 2 of YTH domain-containing protein 1		sp|Q96MU7|YTDC1_HUMAN	1	1.3332569E7	MS/MS	STY:79.9663@AKS(0.6577)PT(0.6577)PDGS(0.6847)ER;
AKSPTPESSTIASYVTLR	AKS[79.9663]PTPESSTIASYVTLR	R	K	911	928	18	3	3S(79.9663)	sp|Q9HAU0-2|PKHA5_HUMAN	Q9HAU0-2	PKHA5_HUMAN	PLEKHA5	Isoform 2 of Pleckstrin homology domain-containing family A member 5		sp|Q9HAU0-4|PKHA5_HUMAN, sp|Q9HAU0-5|PKHA5_HUMAN, sp|Q9HAU0-6|PKHA5_HUMAN, sp|Q9HAU0-8|PKHA5_HUMAN, sp|Q9HAU0|PKHA5_HUMAN	1	3.03377e+06	MS/MS	STY:79.9663@AKS(0.3008)PT(0.3008)PES(0.0782)S(0.0782)T(0.0782)IAS(0.0782)Y(0.0782)VT(0.0073)LR;
ALAMPGRPESPPVFR	ALAMPGRPES[79.9663]PPVFR	R	S	366	380	15	2,3	10S(79.9663)	sp|Q63ZY3-2|KANK2_HUMAN	Q63ZY3-2	KANK2_HUMAN	KANK2	Isoform 2 of KN motif and ankyrin repeat domain-containing protein 2		sp|Q63ZY3-3|KANK2_HUMAN, sp|Q63ZY3|KANK2_HUMAN	3	1.4255655E7	MS/MS	STY:79.9663@ALAMPGRPES(1.0000)PPVFR;
ALDISLSSGEEDEGDEEDSTAGTTK	ALDISLSSGEEDEGDEEDSTAGT[79.9663]T[79.9663]K	K	Q	329	353	25	3	23T(79.9663),24T(79.9663)	sp|Q8IY81|SPB1_HUMAN	Q8IY81	SPB1_HUMAN	FTSJ3	pre-rRNA 2'-O-ribose RNA methyltransferase FTSJ3			1	1.6077719E7	MS/MS	STY:79.9663@ALDIS(0.2810)LS(0.1749)S(0.1749)GEEDEGDEEDS(0.2810)T(0.2810)AGT(0.4036)T(0.4036)K;
ALDISLSSGEEDEGDEEDSTAGTTK	ALDISLSSGEEDEGDEEDS[79.9663]T[79.9663]AGTTK	K	Q	329	353	25	3	19S(79.9663),20T(79.9663)	sp|Q8IY81|SPB1_HUMAN	Q8IY81	SPB1_HUMAN	FTSJ3	pre-rRNA 2'-O-ribose RNA methyltransferase FTSJ3			1	1.6077719E7	MS/MS	STY:79.9663@ALDIS(0.2852)LS(0.2852)S(0.2852)GEEDEGDEEDS(0.2861)T(0.2861)AGT(0.2861)T(0.2861)K;
ALDISLSSGEEDEGDEEDSTAGTTK	ALDIS[79.9663]LSS[79.9663]GEEDEGDEEDSTAGTTK	K	Q	329	353	25	3	5S(79.9663),8S(79.9663)	sp|Q8IY81|SPB1_HUMAN	Q8IY81	SPB1_HUMAN	FTSJ3	pre-rRNA 2'-O-ribose RNA methyltransferase FTSJ3			1	1.6077719E7	MS/MS	STY:79.9663@ALDIS(0.6033)LS(0.6033)S(0.7002)GEEDEGDEEDS(0.0238)T(0.0238)AGT(0.0229)T(0.0229)K;
ALDSNSLENDDLSAPGREPGHFNPESR	ALDSNSLENDDLSAPGREPGHFNPES[79.9663]R	K	E	739	765	27	3	26S(79.9663)	sp|Q32MZ4-2|LRRF1_HUMAN	Q32MZ4-2	LRRF1_HUMAN	LRRFIP1	Isoform 2 of Leucine-rich repeat flightless-interacting protein 1		sp|Q32MZ4-3|LRRF1_HUMAN, sp|Q32MZ4|LRRF1_HUMAN	1	0	MS/MS	STY:79.9663@ALDS(0.0399)NS(0.0399)LENDDLS(0.0399)APGREPGHFNPES(0.8802)R;
ALEAASLSQHPPSLCISDSEEEEEERK	ALEAASLSQHPPS[79.9663]LC[57.0215]ISDS[79.9663]EEEEEERK	R	K	46	72	27	3	13S(79.9663),15C(57.0215),19S(79.9663)	sp|O43159|RRP8_HUMAN	O43159	RRP8_HUMAN	RRP8	Ribosomal RNA-processing protein 8			1	3.3397948E7	MS/MS	STY:79.9663@ALEAAS(0.2838)LS(0.0606)QHPPS(0.7592)LCIS(0.1323)DS(0.7641)EEEEEERK;
ALEAASLSQHPPSLCISDSEEEEEER	ALEAAS[79.9663]LSQHPPS[79.9663]LC[57.0215]ISDSEEEEEER	R	K	46	71	26	3	13S(79.9663),15C(57.0215),6S(79.9663)	sp|O43159|RRP8_HUMAN	O43159	RRP8_HUMAN	RRP8	Ribosomal RNA-processing protein 8			1	1.1718454E7	MS/MS	STY:79.9663@ALEAAS(0.6080)LS(0.6080)QHPPS(0.6828)LCIS(0.0573)DS(0.0439)EEEEEER;
ALEAASLSQHPPSLCISDSEEEEEERK	ALEAAS[79.9663]LS[79.9663]QHPPSLC[57.0215]ISDSEEEEEERK	R	K	46	72	27	3	15C(57.0215),6S(79.9663),8S(79.9663)	sp|O43159|RRP8_HUMAN	O43159	RRP8_HUMAN	RRP8	Ribosomal RNA-processing protein 8			2	3.3397948E7	MS/MS	STY:79.9663@ALEAAS(0.5190)LS(0.5085)QHPPS(0.2947)LCIS(0.2947)DS(0.3830)EEEEEERK;
ALEEGDGSVSGSSPR	ALEEGDGS[79.9663]VSGSSPR	R	S	422	436	15	2	8S(79.9663)	sp|Q8N3X1-2|FNBP4_HUMAN	Q8N3X1-2	FNBP4_HUMAN	FNBP4	Isoform 2 of Formin-binding protein 4		sp|Q8N3X1|FNBP4_HUMAN	1	0	MS/MS	STY:79.9663@ALEEGDGS(0.3273)VS(0.3273)GS(0.3273)S(0.0180)PR;
ALELPLAASSIPRPRTPSPESHR	ALELPLAASSIPRPRT[79.9663]PS[79.9663]PESHR	K	S	597	619	23	3	16T(79.9663),18S(79.9663)	sp|Q66K74-2|MAP1S_HUMAN	Q66K74-2	MAP1S_HUMAN	MAP1S	Isoform 2 of Microtubule-associated protein 1S		sp|Q66K74|MAP1S_HUMAN	2	1.5589984E7	MS/MS	STY:79.9663@ALELPLAAS(0.0343)S(0.0343)IPRPRT(0.6438)PS(0.6438)PES(0.6438)HR;
ALELPLAASSIPRPRTPSPESHR	ALELPLAAS[79.9663]S[79.9663]IPRPRTPSPESHR	K	S	597	619	23	3	10S(79.9663),9S(79.9663)	sp|Q66K74-2|MAP1S_HUMAN	Q66K74-2	MAP1S_HUMAN	MAP1S	Isoform 2 of Microtubule-associated protein 1S		sp|Q66K74|MAP1S_HUMAN	1	1.5589984E7	MS/MS	STY:79.9663@ALELPLAAS(0.4707)S(0.4707)IPRPRT(0.1173)PS(0.4707)PES(0.4707)HR;
ALEQQEAESDSSDTEEKDDDDDDEEDVGKR	ALEQQEAES[79.9663]DSS[79.9663]DTEEKDDDDDDEEDVGKR	K	E	189	218	30	3	12S(79.9663),9S(79.9663)	sp|Q9BXY0|MAK16_HUMAN	Q9BXY0	MAK16_HUMAN	MAK16	Protein MAK16 homolog			1	0	MS/MS	STY:79.9663@ALEQQEAES(0.6265)DS(0.6265)S(0.6798)DT(0.0673)EEKDDDDDDEEDVGKR;
ALEQQEAESDSSDTEEKDDDDDDEEDVGKR	ALEQQEAES[79.9663]DS[79.9663]SDTEEKDDDDDDEEDVGKR	K	E	189	218	30	3	11S(79.9663),9S(79.9663)	sp|Q9BXY0|MAK16_HUMAN	Q9BXY0	MAK16_HUMAN	MAK16	Protein MAK16 homolog			4	2.462527E7	MS/MS	STY:79.9663@ALEQQEAES(0.8415)DS(0.8406)S(0.1589)DT(0.1589)EEKDDDDDDEEDVGKR;
ALEQQEAESDSSDTEEKDDDDDDEEDVGKR	ALEQQEAES[79.9663]DS[79.9663]S[79.9663]DTEEKDDDDDDEEDVGKR	K	E	189	218	30	3	11S(79.9663),12S(79.9663),9S(79.9663)	sp|Q9BXY0|MAK16_HUMAN	Q9BXY0	MAK16_HUMAN	MAK16	Protein MAK16 homolog			2	1.1268185E7	MS/MS	STY:79.9663@ALEQQEAES(0.9230)DS(0.9230)S(0.9230)DT(0.2310)EEKDDDDDDEEDVGKR;
ALEYSNGIFDCQSPTSPFMGSLR	ALEYSNGIFDC[57.0215]QS[79.9663]PTSPFMGSLR	K	A	25	47	23	3	11C(57.0215),13S(79.9663)	sp|Q86W92-2|LIPB1_HUMAN	Q86W92-2	LIPB1_HUMAN	PPFIBP1	Isoform 2 of Liprin-beta-1		sp|Q86W92-4|LIPB1_HUMAN, sp|Q86W92-5|LIPB1_HUMAN, sp|Q86W92|LIPB1_HUMAN	1	0	MS/MS	STY:79.9663@ALEY(0.0903)S(0.0903)NGIFDCQS(0.2049)PT(0.2049)S(0.2049)PFMGS(0.2049)LR;
ALEYSNGIFDCQSPTSPFMGSLR	ALEY[79.9663]SNGIFDC[57.0215]QSPTSPFMGSLR	K	A	25	47	23	3	11C(57.0215),4Y(79.9663)	sp|Q86W92-2|LIPB1_HUMAN	Q86W92-2	LIPB1_HUMAN	PPFIBP1	Isoform 2 of Liprin-beta-1		sp|Q86W92-4|LIPB1_HUMAN, sp|Q86W92-5|LIPB1_HUMAN, sp|Q86W92|LIPB1_HUMAN	1	0	MS/MS	STY:79.9663@ALEY(0.3666)S(0.3666)NGIFDCQS(0.0266)PT(0.0800)S(0.0800)PFMGS(0.0800)LR;
ALFKPPEDSQDDESDSDAEEEQTTKR	ALFKPPEDSQDDESDS[79.9663]DAEEEQT[79.9663]TKR	K	R	299	324	26	3	16S(79.9663),23T(79.9663)	sp|Q13769|THOC5_HUMAN	Q13769	THOC5_HUMAN	THOC5	THO complex subunit 5 homolog			1	0	MS/MS	STY:79.9663@ALFKPPEDS(0.0745)QDDES(0.0745)DS(0.6466)DAEEEQT(0.6023)T(0.6023)KR;
ALFKPPEDSQDDESDSDAEEEQTTK	ALFKPPEDSQDDES[79.9663]DS[79.9663]DAEEEQTTK	K	R	299	323	25	3	14S(79.9663),16S(79.9663)	sp|Q13769|THOC5_HUMAN	Q13769	THOC5_HUMAN	THOC5	THO complex subunit 5 homolog			4	3.4520248E7	MS/MS	STY:79.9663@ALFKPPEDS(0.0632)QDDES(0.9282)DS(0.9282)DAEEEQT(0.0402)T(0.0402)K;
ALFKPPEDSQDDESDSDAEEEQTTK	ALFKPPEDS[79.9663]QDDESDSDAEEEQT[79.9663]T[79.9663]K	K	R	299	323	25	3	23T(79.9663),24T(79.9663),9S(79.9663)	sp|Q13769|THOC5_HUMAN	Q13769	THOC5_HUMAN	THOC5	THO complex subunit 5 homolog			1	9201282	MS/MS	STY:79.9663@ALFKPPEDS(0.5867)QDDES(0.5867)DS(0.5867)DAEEEQT(0.6199)T(0.6199)K;
ALFKPPEDSQDDESDSDAEEEQTTKR	ALFKPPEDS[79.9663]QDDES[79.9663]DSDAEEEQTTKR	K	R	299	324	26	3	14S(79.9663),9S(79.9663)	sp|Q13769|THOC5_HUMAN	Q13769	THOC5_HUMAN	THOC5	THO complex subunit 5 homolog			1	0	MS/MS	STY:79.9663@ALFKPPEDS(0.4000)QDDES(0.4000)DS(0.4000)DAEEEQT(0.4000)T(0.4000)KR;
ALFKPPEDSQDDESDSDAEEEQTTK	ALFKPPEDS[79.9663]QDDES[79.9663]DS[79.9663]DAEEEQTTK	K	R	299	323	25	3	14S(79.9663),16S(79.9663),9S(79.9663)	sp|Q13769|THOC5_HUMAN	Q13769	THOC5_HUMAN	THOC5	THO complex subunit 5 homolog			1	9201282	MS/MS	STY:79.9663@ALFKPPEDS(0.6112)QDDES(0.6112)DS(0.6112)DAEEEQT(0.5832)T(0.5832)K;
ALFKPPEDSQDDESDSDAEEEQTTKR	ALFKPPEDS[79.9663]QDDES[79.9663]DS[79.9663]DAEEEQTTKR	K	R	299	324	26	3	14S(79.9663),16S(79.9663),9S(79.9663)	sp|Q13769|THOC5_HUMAN	Q13769	THOC5_HUMAN	THOC5	THO complex subunit 5 homolog			1	5.61097e+06	MS/MS	STY:79.9663@ALFKPPEDS(0.9011)QDDES(0.9011)DS(0.9011)DAEEEQT(0.1484)T(0.1484)KR;
ALGKYGPADVEDTTGSGATDSKDDDDIDLFGSDDEEESEEAK	ALGKYGPADVEDTTGSGATDSKDDDDIDLFGSDDEEES[79.9663]EEAK	K	R	75	116	42	4	38S(79.9663)	sp|P24534|EF1B_HUMAN	P24534	EF1B_HUMAN	EEF1B2	Elongation factor 1-beta			1	6.19194e+06	MS/MS	STY:79.9663@ALGKY(0.1514)GPADVEDT(0.1514)T(0.1514)GS(0.0987)GAT(0.0987)DS(0.0987)KDDDDIDLFGS(0.0104)DDEEES(0.2394)EEAK;
ALPQTPRPR	ALPQT[79.9663]PRPR	K	S	1488	1496	9	2	5T(79.9663)	sp|Q9UQ35|SRRM2_HUMAN	Q9UQ35	SRRM2_HUMAN	SRRM2	Serine/arginine repetitive matrix protein 2		sp|Q9UQ35-2|SRRM2_HUMAN	1	2.85079e+06	MS/MS	STY:79.9663@ALPQT(1.0000)PRPR;
ALQAPHSPSK	ALQAPHS[79.9663]PSK	R	T	8	17	10	2	7S(79.9663)	sp|Q96AQ6-2|PBIP1_HUMAN	Q96AQ6-2	PBIP1_HUMAN	PBXIP1	Isoform 2 of Pre-B-cell leukemia transcription factor-interacting protein 1		sp|Q96AQ6-3|PBIP1_HUMAN, sp|Q96AQ6|PBIP1_HUMAN	1	0	MS/MS	STY:79.9663@ALQAPHS(0.7913)PS(0.2087)K;
ALRPPTSPGVFGALQNFK	ALRPPTS[79.9663]PGVFGALQNFK	K	E	649	666	18	3	7S(79.9663)	sp|O75151|PHF2_HUMAN	O75151	PHF2_HUMAN	PHF2	Lysine-specific demethylase PHF2			1	1.75414e+06	MS/MS	STY:79.9663@ALRPPT(0.2359)S(0.7641)PGVFGALQNFK;
ALSSGGSITSPPLSPALPK	ALSSGGSITSPPLS[79.9663]PALPK	R	Y	17	35	19	2	14S(79.9663)	sp|Q6Y7W6|GGYF2_HUMAN	Q6Y7W6	GGYF2_HUMAN	GIGYF2	GRB10-interacting GYF protein 2		sp|Q6Y7W6-3|GGYF2_HUMAN, sp|Q6Y7W6-4|GGYF2_HUMAN, sp|Q6Y7W6-5|GGYF2_HUMAN	2	6.0331e+06	MS/MS	STY:79.9663@ALS(0.0436)S(0.0436)GGS(0.0436)IT(0.0436)S(0.0436)PPLS(0.7821)PALPK;
ALSSLHGDDQDSEDEVLTIPEVK	ALSSLHGDDQDS[79.9663]EDEVLTIPEVK	K	V	2398	2420	23	3	12S(79.9663)	sp|P11717|MPRI_HUMAN	P11717	MPRI_HUMAN	IGF2R	Cation-independent mannose-6-phosphate receptor			1	2.0085198E7	MS/MS	STY:79.9663@ALS(0.0220)S(0.0225)LHGDDQDS(0.9354)EDEVLT(0.0201)IPEVK;
ALSSLHGDDQDSEDEVLTIPEVK	ALSSLHGDDQDS[79.9663]EDEVLT[79.9663]IPEVK	K	V	2398	2420	23	3	12S(79.9663),18T(79.9663)	sp|P11717|MPRI_HUMAN	P11717	MPRI_HUMAN	IGF2R	Cation-independent mannose-6-phosphate receptor			1	0	MS/MS	STY:79.9663@ALS(0.4724)S(0.4724)LHGDDQDS(0.5309)EDEVLT(0.5244)IPEVK;
ALSDREEEEEDDEEEEEEVEAAAQR	ALS[79.9663]DREEEEEDDEEEEEEVEAAAQR	R	R	494	518	25	3	3S(79.9663)	sp|Q8N3E9|PLCD3_HUMAN	Q8N3E9	PLCD3_HUMAN	PLCD3	1-phosphatidylinositol 4,5-bisphosphate phosphodiesterase delta-3			1	0	MS/MS	STY:79.9663@ALS(1.0000)DREEEEEDDEEEEEEVEAAAQR;
ALSGRASPVPAPSSGLHAAVR	ALS[79.9663]GRAS[79.9663]PVPAPSSGLHAAVR	R	L	915	935	21	3	3S(79.9663),7S(79.9663)	sp|Q9P206-2|K1522_HUMAN	Q9P206-2	K1522_HUMAN	KIAA1522	Isoform 2 of Uncharacterized protein KIAA1522		sp|Q9P206-3|K1522_HUMAN, sp|Q9P206|K1522_HUMAN	1	2.61551e+06	MS/MS	STY:79.9663@ALS(0.7487)GRAS(0.7487)PVPAPS(0.2513)S(0.2513)GLHAAVR;
ALSSDSILSPAPDAR	ALS[79.9663]SDSILSPAPDAR	R	A	392	406	15	2	3S(79.9663)	sp|Q8IVT2|MISP_HUMAN	Q8IVT2	MISP_HUMAN	MISP	Mitotic interactor and substrate of PLK1			1	3.7074e+06	MS/MS	STY:79.9663@ALS(0.8995)S(0.0525)DS(0.0255)ILS(0.0225)PAPDAR;
ALSSLHGDDQDSEDEVLTIPEVK	ALS[79.9663]SLHGDDQDSEDEVLTIPEVK	K	V	2398	2420	23	3	3S(79.9663)	sp|P11717|MPRI_HUMAN	P11717	MPRI_HUMAN	IGF2R	Cation-independent mannose-6-phosphate receptor			1	0	MS/MS	STY:79.9663@ALS(0.4492)S(0.4492)LHGDDQDS(0.0323)EDEVLT(0.0693)IPEVK;
ALVATPGKK	ALVAT[79.9663]PGKK	K	G	117	125	9	2	5T(79.9663)	sp|P19338|NUCL_HUMAN	P19338	NUCL_HUMAN	NCL	Nucleolin			1	0	MS/MS	STY:79.9663@ALVAT(1.0000)PGKK;
ALVEFESNPEETREPGSPPSVQR	ALVEFESNPEETREPGSPPS[79.9663]VQR	R	A	31	53	23	3	20S(79.9663)	sp|Q9H6F5|CCD86_HUMAN	Q9H6F5	CCD86_HUMAN	CCDC86	Coiled-coil domain-containing protein 86			1	5.9504272E7	MS/MS	STY:79.9663@ALVEFES(0.0322)NPEET(0.0232)REPGS(0.0265)PPS(0.9182)VQR;
ALVEFESNPEETREPGSPPSVQR	ALVEFESNPEETREPGS[79.9663]PPSVQR	R	A	31	53	23	3	17S(79.9663)	sp|Q9H6F5|CCD86_HUMAN	Q9H6F5	CCD86_HUMAN	CCDC86	Coiled-coil domain-containing protein 86			2	5.970148E7	MS/MS	STY:79.9663@ALVEFES(0.0201)NPEET(0.0505)REPGS(0.8738)PPS(0.0556)VQR;
ALVEFESNPEETREPGSPPSVQR	ALVEFESNPEET[79.9663]REPGSPPSVQR	R	A	31	53	23	3	12T(79.9663)	sp|Q9H6F5|CCD86_HUMAN	Q9H6F5	CCD86_HUMAN	CCDC86	Coiled-coil domain-containing protein 86			2	3.839612E7	MS/MS	STY:79.9663@ALVEFES(0.0622)NPEET(0.7579)REPGS(0.1484)PPS(0.0315)VQR;
ALVEFESNPEETREPGSPPSVQR	ALVEFES[79.9663]NPEETREPGSPPSVQR	R	A	31	53	23	3	7S(79.9663)	sp|Q9H6F5|CCD86_HUMAN	Q9H6F5	CCD86_HUMAN	CCDC86	Coiled-coil domain-containing protein 86			1	5.970148E7	MS/MS	STY:79.9663@ALVEFES(0.3764)NPEET(0.0193)REPGS(0.3021)PPS(0.3021)VQR;
ALVLDCHYPEDEVGQEDEAESDIFSIR	ALVLDC[57.0215]HY[79.9663]PEDEVGQEDEAESDIFSIR	K	E	181	207	27	3	6C(57.0215),8Y(79.9663)	sp|Q07021|C1QBP_HUMAN	Q07021	C1QBP_HUMAN	C1QBP	Complement component 1 Q subcomponent-binding protein, mitochondrial			1	0	MS/MS	STY:79.9663@ALVLDCHY(0.8893)PEDEVGQEDEAES(0.0774)DIFS(0.0333)IR;
ALVVPEPEPDSDSNQER	ALVVPEPEPDS[79.9663]DSNQER	K	K	126	142	17	2	11S(79.9663)	sp|Q5VTR2|BRE1A_HUMAN	Q5VTR2	BRE1A_HUMAN	RNF20	E3 ubiquitin-protein ligase BRE1A			2	1.4677191E7	MS/MS	STY:79.9663@ALVVPEPEPDS(0.9167)DS(0.0833)NQER;
AMDNHSDSEEELAAFCPQLDDSTVAR	AMDNHS[79.9663]DS[79.9663]EEELAAFC[57.0215]PQLDDSTVAR	R	E	58	83	26	3	16C(57.0215),6S(79.9663),8S(79.9663)	sp|Q86VR2-2|RETR3_HUMAN	Q86VR2-2	RETR3_HUMAN	RETREG3	Isoform 2 of Reticulophagy regulator 3		sp|Q86VR2|RETR3_HUMAN	1	1.2190744E7	MS/MS	STY:79.9663@AMDNHS(0.8842)DS(0.8842)EEELAAFCPQLDDS(0.1023)T(0.1293)VAR;
AMDNHSDSEEELAAFCPQLDDSTVAR	AM[15.9949]DNHS[79.9663]DS[79.9663]EEELAAFC[57.0215]PQLDDSTVAR	R	E	58	83	26	3	16C(57.0215),2M(15.9949),6S(79.9663),8S(79.9663)	sp|Q86VR2-2|RETR3_HUMAN	Q86VR2-2	RETR3_HUMAN	RETREG3	Isoform 2 of Reticulophagy regulator 3		sp|Q86VR2|RETR3_HUMAN	1	0	MS/MS	STY:79.9663@AMDNHS(0.7725)DS(0.7725)EEELAAFCPQLDDS(0.2376)T(0.2175)VAR;M:15.9949@AM(1.0000)DNHSDSEEELAAFCPQLDDSTVAR;
ANEAGGQVGPEAPRPPETSPEMR	ANEAGGQVGPEAPRPPET[79.9663]SPEMR	R	S	267	289	23	3	18T(79.9663)	sp|Q8N3D4|EH1L1_HUMAN	Q8N3D4	EH1L1_HUMAN	EHBP1L1	EH domain-binding protein 1-like protein 1			1	8650708	MS/MS	STY:79.9663@ANEAGGQVGPEAPRPPET(0.5000)S(0.5000)PEMR;
ANSDDERPVASDNDDEK	ANS[79.9663]DDERPVAS[79.9663]DNDDEK	K	Q	210	226	17	2	11S(79.9663),3S(79.9663)	sp|Q8WVC0-2|LEO1_HUMAN	Q8WVC0-2	LEO1_HUMAN	LEO1	Isoform 2 of RNA polymerase-associated protein LEO1		sp|Q8WVC0|LEO1_HUMAN	2	4.2693476E7	MS/MS	STY:79.9663@ANS(1.0000)DDERPVAS(1.0000)DNDDEK;
APEPLGPADQSELGPEQLEAEVGESSDEEPVESR	APEPLGPADQSELGPEQLEAEVGES[79.9663]SDEEPVES[79.9663]R	K	A	141	174	34	3	25S(79.9663),33S(79.9663)	sp|Q969G5|CAVN3_HUMAN	Q969G5	CAVN3_HUMAN	CAVIN3	Caveolae-associated protein 3			1	8.390832E7	MS/MS	STY:79.9663@APEPLGPADQS(0.1441)ELGPEQLEAEVGES(0.6011)S(0.6011)DEEPVES(0.6536)R;
APEPLGPADQSELGPEQLEAEVGESSDEEPVESR	APEPLGPADQSELGPEQLEAEVGES[79.9663]S[79.9663]DEEPVESR	K	A	141	174	34	3	25S(79.9663),26S(79.9663)	sp|Q969G5|CAVN3_HUMAN	Q969G5	CAVN3_HUMAN	CAVIN3	Caveolae-associated protein 3			1	8.390832E7	MS/MS	STY:79.9663@APEPLGPADQS(0.3530)ELGPEQLEAEVGES(0.7064)S(0.7102)DEEPVES(0.2304)R;
APIDTSDVEEK	APIDTS[79.9663]DVEEK	K	A	301	311	11	2	6S(79.9663)	sp|Q06265-2|EXOS9_HUMAN	Q06265-2	EXOS9_HUMAN	EXOSC9	Isoform 2 of Exosome complex component RRP45		sp|Q06265-3|EXOS9_HUMAN, sp|Q06265-4|EXOS9_HUMAN, sp|Q06265|EXOS9_HUMAN	1	1.2282619E7	MS/MS	STY:79.9663@APIDT(0.1222)S(0.8778)DVEEK;
APIDTSDVEEK	APIDT[79.9663]SDVEEK	K	A	301	311	11	2	5T(79.9663)	sp|Q06265-2|EXOS9_HUMAN	Q06265-2	EXOS9_HUMAN	EXOSC9	Isoform 2 of Exosome complex component RRP45		sp|Q06265-3|EXOS9_HUMAN, sp|Q06265-4|EXOS9_HUMAN, sp|Q06265|EXOS9_HUMAN	3	2.0075272E7	MS/MS	STY:79.9663@APIDT(0.8818)S(0.1182)DVEEK;
APPGAPGPGPGSGAPGSQEEEEEPGLVEGDPGDGAIEDPELEAIK	APPGAPGPGPGS[79.9663]GAPGSQEEEEEPGLVEGDPGDGAIEDPELEAIK	R	A	79	123	45	3	12S(79.9663)	sp|Q86U42-2|PABP2_HUMAN	Q86U42-2	PABP2_HUMAN	PABPN1	Isoform 2 of Polyadenylate-binding protein 2		sp|Q86U42|PABP2_HUMAN	1	0	MS/MS	STY:79.9663@APPGAPGPGPGS(0.8023)GAPGS(0.1977)QEEEEEPGLVEGDPGDGAIEDPELEAIK;
APPQTHLPSGASSGTGSASATHGGGSPPGTR	APPQTHLPSGASSGTGSAS[79.9663]ATHGGGSPPGTR	R	G	88	118	31	4	19S(79.9663)	sp|P46379-2|BAG6_HUMAN	P46379-2	BAG6_HUMAN	BAG6	Isoform 2 of Large proline-rich protein BAG6		sp|P46379-3|BAG6_HUMAN, sp|P46379-4|BAG6_HUMAN, sp|P46379-5|BAG6_HUMAN, sp|P46379|BAG6_HUMAN	1	4242151	MS/MS	STY:79.9663@APPQT(0.0050)HLPS(0.0039)GAS(0.0039)S(0.0039)GT(0.0042)GS(0.0042)AS(0.2438)AT(0.2438)HGGGS(0.2438)PPGT(0.2438)R;
APQESQVVVEGGSGEGQGSPSQLLSDDETK	APQESQVVVEGGSGEGQGSPSQLLS[79.9663]DDETK	K	D	1103	1132	30	3	25S(79.9663)	sp|Q66K14-2|TBC9B_HUMAN	Q66K14-2	TBC9B_HUMAN	TBC1D9B	Isoform 2 of TBC1 domain family member 9B		sp|Q66K14|TBC9B_HUMAN	1	0	MS/MS	STY:79.9663@APQES(0.0112)QVVVEGGS(0.0161)GEGQGS(0.0333)PS(0.0333)QLLS(0.4531)DDET(0.4531)K;
APQQQPPPQQPPPPQPPPQQPPPPPSYSPAR	APQQQPPPQQPPPPQPPPQQPPPPPS[79.9663]YSPAR	R	N	691	721	31	4	26S(79.9663)	sp|Q9BUJ2-2|HNRL1_HUMAN	Q9BUJ2-2	HNRL1_HUMAN	HNRNPUL1	Isoform 2 of Heterogeneous nuclear ribonucleoprotein U-like protein 1		sp|Q9BUJ2-3|HNRL1_HUMAN, sp|Q9BUJ2-4|HNRL1_HUMAN, sp|Q9BUJ2-5|HNRL1_HUMAN, sp|Q9BUJ2|HNRL1_HUMAN	2	4286243	MS/MS	STY:79.9663@APQQQPPPQQPPPPQPPPQQPPPPPS(0.3333)Y(0.3333)S(0.3333)PAR;
APQTSSSPPPVR	APQTSSS[79.9663]PPPVR	R	R	690	701	12	2	7S(79.9663)	sp|Q8IYB3|SRRM1_HUMAN	Q8IYB3	SRRM1_HUMAN	SRRM1	Serine/arginine repetitive matrix protein 1		sp|Q8IYB3-2|SRRM1_HUMAN	2	4.2090276E7	MS/MS	STY:79.9663@APQT(0.0266)S(0.0266)S(0.0266)S(0.9202)PPPVR;
APQTSSSPPPVR	APQTSS[79.9663]SPPPVR	R	R	690	701	12	2	6S(79.9663)	sp|Q8IYB3|SRRM1_HUMAN	Q8IYB3	SRRM1_HUMAN	SRRM1	Serine/arginine repetitive matrix protein 1		sp|Q8IYB3-2|SRRM1_HUMAN	1	0	MS/MS	STY:79.9663@APQT(0.0252)S(0.0252)S(0.9178)S(0.0318)PPPVR;
APQTSSSPPPVR	APQTS[79.9663]SSPPPVR	R	R	690	701	12	2	5S(79.9663)	sp|Q8IYB3|SRRM1_HUMAN	Q8IYB3	SRRM1_HUMAN	SRRM1	Serine/arginine repetitive matrix protein 1		sp|Q8IYB3-2|SRRM1_HUMAN	2	0	MS/MS	STY:79.9663@APQT(0.0250)S(0.8439)S(0.0656)S(0.0656)PPPVR;
APQTSSSPPPVRR	APQTS[79.9663]SSPPPVRR	R	G	690	702	13	2	5S(79.9663)	sp|Q8IYB3|SRRM1_HUMAN	Q8IYB3	SRRM1_HUMAN	SRRM1	Serine/arginine repetitive matrix protein 1		sp|Q8IYB3-2|SRRM1_HUMAN	1	1.1854555E7	MS/MS	STY:79.9663@APQT(0.0232)S(0.3256)S(0.3256)S(0.3256)PPPVRR;
APQTSSSPPPVRR	APQTS[79.9663]S[79.9663]SPPPVRR	R	G	690	702	13	2	5S(79.9663),6S(79.9663)	sp|Q8IYB3|SRRM1_HUMAN	Q8IYB3	SRRM1_HUMAN	SRRM1	Serine/arginine repetitive matrix protein 1		sp|Q8IYB3-2|SRRM1_HUMAN	1	1.459389E7	MS/MS	STY:79.9663@APQT(0.4612)S(0.5129)S(0.5129)S(0.5129)PPPVRR;
APQTSSSPPPVR	APQT[79.9663]SSSPPPVR	R	R	690	701	12	2	4T(79.9663)	sp|Q8IYB3|SRRM1_HUMAN	Q8IYB3	SRRM1_HUMAN	SRRM1	Serine/arginine repetitive matrix protein 1		sp|Q8IYB3-2|SRRM1_HUMAN	10	4.2090276E7	MS/MS	STY:79.9663@APQT(0.4838)S(0.4838)S(0.0162)S(0.0162)PPPVR;
APQTSSSPPPVR	APQT[79.9663]S[79.9663]SSPPPVR	R	R	690	701	12	2	4T(79.9663),5S(79.9663)	sp|Q8IYB3|SRRM1_HUMAN	Q8IYB3	SRRM1_HUMAN	SRRM1	Serine/arginine repetitive matrix protein 1		sp|Q8IYB3-2|SRRM1_HUMAN	13	3.4778264E7	MS/MS	STY:79.9663@APQT(0.7291)S(0.7291)S(0.2709)S(0.2709)PPPVR;
APQTSSSPPPVRR	APQT[79.9663]S[79.9663]SSPPPVRR	R	G	690	702	13	2	4T(79.9663),5S(79.9663)	sp|Q8IYB3|SRRM1_HUMAN	Q8IYB3	SRRM1_HUMAN	SRRM1	Serine/arginine repetitive matrix protein 1		sp|Q8IYB3-2|SRRM1_HUMAN	1	1.459389E7	MS/MS	STY:79.9663@APQT(0.5000)S(0.5000)S(0.5000)S(0.5000)PPPVRR;
APSDSSLGTPSDGRPELR	APSDSS[79.9663]LGTPS[79.9663]DGRPELR	R	G	294	311	18	2	11S(79.9663),6S(79.9663)	sp|Q15642-2|CIP4_HUMAN	Q15642-2	CIP4_HUMAN	TRIP10	Isoform 2 of Cdc42-interacting protein 4		sp|Q15642-3|CIP4_HUMAN, sp|Q15642-4|CIP4_HUMAN, sp|Q15642-5|CIP4_HUMAN, sp|Q15642|CIP4_HUMAN	1	1.3896246E7	MS/MS	STY:79.9663@APS(0.0689)DS(0.0689)S(0.8853)LGT(0.0931)PS(0.8838)DGRPELR;
APSVANVGSHCDLSLK	APSVANVGSHC[57.0215]DLS[79.9663]LK	R	I	2142	2157	16	2	11C(57.0215),14S(79.9663)	sp|P21333-2|FLNA_HUMAN	P21333-2	FLNA_HUMAN	FLNA	Isoform 2 of Filamin-A		sp|P21333|FLNA_HUMAN	2	2.7298584E7	MS/MS	STY:79.9663@APS(0.4017)VANVGS(0.0223)HCDLS(0.5760)LK;
APSDSSLGTPSDGRPELR	APS[79.9663]DSSLGT[79.9663]PSDGRPELR	R	G	294	311	18	2	3S(79.9663),9T(79.9663)	sp|Q15642-2|CIP4_HUMAN	Q15642-2	CIP4_HUMAN	TRIP10	Isoform 2 of Cdc42-interacting protein 4		sp|Q15642-3|CIP4_HUMAN, sp|Q15642-4|CIP4_HUMAN, sp|Q15642-5|CIP4_HUMAN, sp|Q15642|CIP4_HUMAN	1	1.3641666E7	MS/MS	STY:79.9663@APS(0.5837)DS(0.1929)S(0.1929)LGT(0.5152)PS(0.5152)DGRPELR;
APSPAPSSVPLGSEK	APS[79.9663]PAPSSVPLGSEK	R	P	2398	2412	15	2	3S(79.9663)	sp|O75179-2|ANR17_HUMAN	O75179-2	ANR17_HUMAN	ANKRD17	Isoform 2 of Ankyrin repeat domain-containing protein 17		sp|O75179-4|ANR17_HUMAN, sp|O75179-6|ANR17_HUMAN, sp|O75179-7|ANR17_HUMAN, sp|O75179|ANR17_HUMAN	1	0	MS/MS	STY:79.9663@APS(0.2500)PAPS(0.2500)S(0.2500)VPLGS(0.2500)EK;
APSPPPTASNSSNSQSEK	APS[79.9663]PPPTASNSSNSQSEK	R	E	428	445	18	2	3S(79.9663)	sp|Q8N108-12|MIER1_HUMAN	Q8N108-12	MIER1_HUMAN	MIER1	Isoform 2 of Mesoderm induction early response protein 1		sp|Q8N108-13|MIER1_HUMAN, sp|Q8N108-14|MIER1_HUMAN, sp|Q8N108-15|MIER1_HUMAN, sp|Q8N108-16|MIER1_HUMAN, sp|Q8N108-17|MIER1_HUMAN, sp|Q8N108-18|MIER1_HUMAN, sp|Q8N108-19|MIER1_HUMAN, sp|Q8N108|MIER1_HUMAN	2	4.26462e+06	MS/MS	STY:79.9663@APS(0.4346)PPPT(0.4346)AS(0.0261)NS(0.0261)S(0.0261)NS(0.0261)QS(0.0261)EK;
APSVANVGSHCDLSLK	APS[79.9663]VANVGSHC[57.0215]DLSLK	R	I	2142	2157	16	2	11C(57.0215),3S(79.9663)	sp|P21333-2|FLNA_HUMAN	P21333-2	FLNA_HUMAN	FLNA	Isoform 2 of Filamin-A		sp|P21333|FLNA_HUMAN	3	2.7483396E7	MS/MS	STY:79.9663@APS(0.9038)VANVGS(0.0452)HCDLS(0.0509)LK;
APVPSTCSSTFPEELSPPSHQAK	APVPSTC[57.0215]SSTFPEELSPPS[79.9663]HQAK	K	R	154	176	23	3	19S(79.9663),7C(57.0215)	sp|Q14980-2|NUMA1_HUMAN	Q14980-2	NUMA1_HUMAN	NUMA1	Isoform 2 of Nuclear mitotic apparatus protein 1		sp|Q14980-3|NUMA1_HUMAN, sp|Q14980-4|NUMA1_HUMAN, sp|Q14980-5|NUMA1_HUMAN, sp|Q14980|NUMA1_HUMAN	1	0	MS/MS	STY:79.9663@APVPS(0.0296)T(0.0296)CS(0.0296)S(0.0296)T(0.0296)FPEELS(0.0567)PPS(0.7952)HQAK;
APVPSTCSSTFPEELSPPSHQAK	APVPSTC[57.0215]SSTFPEELS[79.9663]PPSHQAK	K	R	154	176	23	3	16S(79.9663),7C(57.0215)	sp|Q14980-2|NUMA1_HUMAN	Q14980-2	NUMA1_HUMAN	NUMA1	Isoform 2 of Nuclear mitotic apparatus protein 1		sp|Q14980-3|NUMA1_HUMAN, sp|Q14980-4|NUMA1_HUMAN, sp|Q14980-5|NUMA1_HUMAN, sp|Q14980|NUMA1_HUMAN	3	1.9554832E7	MS/MS	STY:79.9663@APVPS(0.0119)T(0.0119)CS(0.0119)S(0.0119)T(0.0119)FPEELS(0.4703)PPS(0.4703)HQAK;
APVQPQQSPAAAPGGTDEK	APVQPQQSPAAAPGGT[79.9663]DEK	K	P	9	27	19	2	16T(79.9663)	sp|Q13200|PSMD2_HUMAN	Q13200	PSMD2_HUMAN	PSMD2	26S proteasome non-ATPase regulatory subunit 2			1	0	MS/MS	STY:79.9663@APVQPQQS(0.2145)PAAAPGGT(0.7855)DEK;
APVQPQQSPAAAPGGTDEK	APVQPQQS[79.9663]PAAAPGGTDEK	K	P	9	27	19	2	8S(79.9663)	sp|Q13200|PSMD2_HUMAN	Q13200	PSMD2_HUMAN	PSMD2	26S proteasome non-ATPase regulatory subunit 2			3	0	MS/MS	STY:79.9663@APVQPQQS(0.9406)PAAAPGGT(0.0594)DEK;
APVQPQQSPAAAPGGTDEKPSGK	APVQPQQS[79.9663]PAAAPGGTDEKPSGK	K	E	9	31	23	3	8S(79.9663)	sp|Q13200|PSMD2_HUMAN	Q13200	PSMD2_HUMAN	PSMD2	26S proteasome non-ATPase regulatory subunit 2			2	2.5639894E7	MS/MS	STY:79.9663@APVQPQQS(0.9395)PAAAPGGT(0.0303)DEKPS(0.0302)GK;
APVSSTESVIQSNTPTPPPSQPLNETAEEESR	APVSSTESVIQS[79.9663]NT[79.9663]PTPPPSQPLNETAEEESR	K	I	826	857	32	3	12S(79.9663),14T(79.9663)	sp|Q9HC35-2|EMAL4_HUMAN	Q9HC35-2	EMAL4_HUMAN	EML4	Isoform 2 of Echinoderm microtubule-associated protein-like 4		sp|Q9HC35|EMAL4_HUMAN	1	8159634	MS/MS	STY:79.9663@APVS(0.0521)S(0.0521)T(0.0521)ES(0.0521)VIQS(0.3032)NT(0.3032)PT(0.2758)PPPS(0.3032)QPLNET(0.3032)AEEES(0.3032)R;
APVSSTESVIQSNTPTPPPSQPLNETAEEESR	APVS[79.9663]S[79.9663]TESVIQSNTPTPPPSQPLNETAEEESR	K	I	826	857	32	3	4S(79.9663),5S(79.9663)	sp|Q9HC35-2|EMAL4_HUMAN	Q9HC35-2	EMAL4_HUMAN	EML4	Isoform 2 of Echinoderm microtubule-associated protein-like 4		sp|Q9HC35|EMAL4_HUMAN	1	0	MS/MS	STY:79.9663@APVS(0.2195)S(0.2195)T(0.2195)ES(0.2195)VIQS(0.2195)NT(0.2195)PT(0.2195)PPPS(0.2195)QPLNET(0.2195)AEEES(0.0242)R;
AQAVSEEEEEEEGK	AQAVS[79.9663]EEEEEEEGK	K	S	78	91	14	2	5S(79.9663)	sp|Q9GZR7-2|DDX24_HUMAN	Q9GZR7-2	DDX24_HUMAN	DDX24	Isoform 2 of ATP-dependent RNA helicase DDX24		sp|Q9GZR7|DDX24_HUMAN	3	0	MS/MS	STY:79.9663@AQAVS(1.0000)EEEEEEEGK;
AQGEPVAGHESPKIPYEK	AQGEPVAGHESPKIPY[79.9663]EK	R	Q	789	806	18	3	16Y(79.9663)	sp|O94979-2|SC31A_HUMAN	O94979-2	SC31A_HUMAN	SEC31A	Isoform 2 of Protein transport protein Sec31A		sp|O94979-10|SC31A_HUMAN, sp|O94979-3|SC31A_HUMAN, sp|O94979-4|SC31A_HUMAN, sp|O94979-6|SC31A_HUMAN, sp|O94979-7|SC31A_HUMAN, sp|O94979-8|SC31A_HUMAN, sp|O94979-9|SC31A_HUMAN, sp|O94979|SC31A_HUMAN	1	4.6588764E7	MS/MS	STY:79.9663@AQGEPVAGHES(0.2666)PKIPY(0.7334)EK;
AQGEPVAGHESPKIPYEK	AQGEPVAGHES[79.9663]PKIPYEK	R	Q	789	806	18	2,3	11S(79.9663)	sp|O94979-2|SC31A_HUMAN	O94979-2	SC31A_HUMAN	SEC31A	Isoform 2 of Protein transport protein Sec31A		sp|O94979-10|SC31A_HUMAN, sp|O94979-3|SC31A_HUMAN, sp|O94979-4|SC31A_HUMAN, sp|O94979-6|SC31A_HUMAN, sp|O94979-7|SC31A_HUMAN, sp|O94979-8|SC31A_HUMAN, sp|O94979-9|SC31A_HUMAN, sp|O94979|SC31A_HUMAN	7	5.4370972E7	MS/MS	STY:79.9663@AQGEPVAGHES(0.9415)PKIPY(0.0585)EK;
AQGVRSPLLR	AQGVRS[79.9663]PLLR	R	Q	661	670	10	2	6S(79.9663)	sp|O60343-2|TBCD4_HUMAN	O60343-2	TBCD4_HUMAN	TBC1D4	Isoform 2 of TBC1 domain family member 4		sp|O60343-3|TBCD4_HUMAN, sp|O60343|TBCD4_HUMAN	1	2229738	MS/MS	STY:79.9663@AQGVRS(1.0000)PLLR;
AQKEEEEEEEGSPQEEEEEEEEENRAEEEEASTEEEDK	AQKEEEEEEEGS[79.9663]PQEEEEEEEEENRAEEEEAS[79.9663]TEEEDK	R	E	576	613	38	4	12S(79.9663),32S(79.9663)	sp|Q14160-2|SCRIB_HUMAN	Q14160-2	SCRIB_HUMAN	SCRIB	Isoform 2 of Protein scribble homolog		sp|Q14160-3|SCRIB_HUMAN, sp|Q14160|SCRIB_HUMAN	1	5416750	MS/MS	STY:79.9663@AQKEEEEEEEGS(0.6778)PQEEEEEEEEENRAEEEEAS(0.6907)T(0.6316)EEEDK;
AQLEPVASPAK	AQLEPVAS[79.9663]PAK	K	K	1428	1438	11	2	8S(79.9663)	sp|Q15149|PLEC_HUMAN	Q15149	PLEC_HUMAN	PLEC	Plectin		sp|Q15149-2|PLEC_HUMAN, sp|Q15149-3|PLEC_HUMAN, sp|Q15149-4|PLEC_HUMAN, sp|Q15149-5|PLEC_HUMAN, sp|Q15149-6|PLEC_HUMAN, sp|Q15149-7|PLEC_HUMAN, sp|Q15149-8|PLEC_HUMAN, sp|Q15149-9|PLEC_HUMAN	1	2.61077e+06	MS/MS	STY:79.9663@AQLEPVAS(1.0000)PAK;
AQQQEEQGSVNDVKEEEK	AQQQEEQGS[79.9663]VNDVKEEEK	K	E	535	552	18	3	9S(79.9663)	sp|Q9Y4W2-2|LAS1L_HUMAN	Q9Y4W2-2	LAS1L_HUMAN	LAS1L	Isoform 2 of Ribosomal biogenesis protein LAS1L		sp|Q9Y4W2-3|LAS1L_HUMAN, sp|Q9Y4W2|LAS1L_HUMAN	1	4571273	MS/MS	STY:79.9663@AQQQEEQGS(1.0000)VNDVKEEEK;
AQSSPAAPASLSAPEPASQAR	AQSSPAAPASLS[79.9663]APEPASQAR	R	V	146	166	21	3	12S(79.9663)	sp|Q8WUI4-10|HDAC7_HUMAN	Q8WUI4-10	HDAC7_HUMAN	HDAC7	Isoform 10 of Histone deacetylase 7		sp|Q8WUI4-3|HDAC7_HUMAN, sp|Q8WUI4-4|HDAC7_HUMAN, sp|Q8WUI4-5|HDAC7_HUMAN, sp|Q8WUI4-6|HDAC7_HUMAN, sp|Q8WUI4-7|HDAC7_HUMAN, sp|Q8WUI4-8|HDAC7_HUMAN, sp|Q8WUI4|HDAC7_HUMAN	1	0	MS/MS	STY:79.9663@AQS(0.1060)S(0.1060)PAAPAS(0.1060)LS(0.6612)APEPAS(0.0209)QAR;
AQSSPAAPASLSAPEPASQAR	AQS[79.9663]SPAAPASLSAPEPASQAR	R	V	146	166	21	2	3S(79.9663)	sp|Q8WUI4-10|HDAC7_HUMAN	Q8WUI4-10	HDAC7_HUMAN	HDAC7	Isoform 10 of Histone deacetylase 7		sp|Q8WUI4-3|HDAC7_HUMAN, sp|Q8WUI4-4|HDAC7_HUMAN, sp|Q8WUI4-5|HDAC7_HUMAN, sp|Q8WUI4-6|HDAC7_HUMAN, sp|Q8WUI4-7|HDAC7_HUMAN, sp|Q8WUI4-8|HDAC7_HUMAN, sp|Q8WUI4|HDAC7_HUMAN	1	0	MS/MS	STY:79.9663@AQS(0.3066)S(0.3066)PAAPAS(0.3066)LS(0.0400)APEPAS(0.0400)QAR;
AQSTDSLGTSGSLQSK	AQS[79.9663]T[79.9663]DSLGTSGSLQSK	R	A	405	420	16	2	3S(79.9663),4T(79.9663)	sp|Q15276-2|RABE1_HUMAN	Q15276-2	RABE1_HUMAN	RABEP1	Isoform 2 of Rab GTPase-binding effector protein 1		sp|Q15276|RABE1_HUMAN	1	0	MS/MS	STY:79.9663@AQS(0.5862)T(0.4836)DS(0.4836)LGT(0.1116)S(0.1116)GS(0.1116)LQS(0.1116)K;
AQSYDIQAWK	AQS[79.9663]YDIQAWK	R	K	1313	1322	10	2	3S(79.9663)	sp|Q8WWQ0|PHIP_HUMAN	Q8WWQ0	PHIP_HUMAN	PHIP	PH-interacting protein			1	0	MS/MS	STY:79.9663@AQS(0.5000)Y(0.5000)DIQAWK;
AQSYDIQAWKK	AQS[79.9663]YDIQAWKK	R	Q	1313	1323	11	2	3S(79.9663)	sp|Q8WWQ0|PHIP_HUMAN	Q8WWQ0	PHIP_HUMAN	PHIP	PH-interacting protein			1	0	MS/MS	STY:79.9663@AQS(0.5000)Y(0.5000)DIQAWKK;
AQSYPDNHQEFSDYDNPIFEK	AQS[79.9663]YPDNHQEFSDYDNPIFEK	R	F	237	257	21	3	3S(79.9663)	sp|Q9Y2U5|M3K2_HUMAN	Q9Y2U5	M3K2_HUMAN	MAP3K2	Mitogen-activated protein kinase kinase kinase 2			1	6.82627e+06	MS/MS	STY:79.9663@AQS(0.2500)Y(0.2500)PDNHQEFS(0.2500)DY(0.2500)DNPIFEK;
AQTLPTSVVTITSESSPGKR	AQTLPTSVVTITSES[79.9663]SPGKR	R	E	2326	2345	20	3	15S(79.9663)	sp|Q01082|SPTB2_HUMAN	Q01082	SPTB2_HUMAN	SPTBN1	Spectrin beta chain, non-erythrocytic 1			1	0	MS/MS	STY:79.9663@AQT(0.0654)LPT(0.0798)S(0.0798)VVT(0.0734)IT(0.0734)S(0.0734)ES(0.2773)S(0.2773)PGKR;
AQTPPGPSLSGSK	AQTPPGPSLSGS[79.9663]K	K	S	1001	1013	13	2	12S(79.9663)	sp|Q9UQ35|SRRM2_HUMAN	Q9UQ35	SRRM2_HUMAN	SRRM2	Serine/arginine repetitive matrix protein 2		sp|Q9UQ35-2|SRRM2_HUMAN	1	1.1744667E7	MS/MS	STY:79.9663@AQT(0.0407)PPGPS(0.0407)LS(0.0407)GS(0.8779)K;
AQTPPGPSLSGSK	AQTPPGPS[79.9663]LSGSK	K	S	1001	1013	13	2	8S(79.9663)	sp|Q9UQ35|SRRM2_HUMAN	Q9UQ35	SRRM2_HUMAN	SRRM2	Serine/arginine repetitive matrix protein 2		sp|Q9UQ35-2|SRRM2_HUMAN	1	1.1744667E7	MS/MS	STY:79.9663@AQT(0.1899)PPGPS(0.2700)LS(0.2700)GS(0.2700)K;
AQTPPGPSLSGSK	AQT[79.9663]PPGPSLSGSK	K	S	1001	1013	13	2	3T(79.9663)	sp|Q9UQ35|SRRM2_HUMAN	Q9UQ35	SRRM2_HUMAN	SRRM2	Serine/arginine repetitive matrix protein 2		sp|Q9UQ35-2|SRRM2_HUMAN	3	1.1744667E7	MS/MS	STY:79.9663@AQT(0.2500)PPGPS(0.2500)LS(0.2500)GS(0.2500)K;
AQTPPGPSLSGSKSPCPQEK	AQT[79.9663]PPGPS[79.9663]LSGSKSPC[57.0215]PQEK	K	S	1001	1020	20	3	16C(57.0215),3T(79.9663),8S(79.9663)	sp|Q9UQ35|SRRM2_HUMAN	Q9UQ35	SRRM2_HUMAN	SRRM2	Serine/arginine repetitive matrix protein 2		sp|Q9UQ35-2|SRRM2_HUMAN	6	3.0466444E7	MS/MS	STY:79.9663@AQT(0.7440)PPGPS(0.7351)LS(0.0404)GS(0.2402)KS(0.2402)PCPQEK;
ARALGTEVIQLFPEKGNMGK	ARALGT[79.9663]EVIQLFPEKGNMGK	K	I	319	338	20	3	6T(79.9663)	sp|O95831-3|AIFM1_HUMAN	O95831-3	AIFM1_HUMAN	AIFM1	Isoform 3 of Apoptosis-inducing factor 1, mitochondrial		sp|O95831|AIFM1_HUMAN	1	3.4352788E7	MS/MS	STY:79.9663@ARALGT(1.0000)EVIQLFPEKGNMGK;
ARGDSEALDEES	ARGDS[79.9663]EALDEES	R	-	659	670	12	2	5S(79.9663)	sp|Q7Z4V5-2|HDGR2_HUMAN	Q7Z4V5-2	HDGR2_HUMAN	HDGFL2	Isoform 2 of Hepatoma-derived growth factor-related protein 2		sp|Q7Z4V5-3|HDGR2_HUMAN, sp|Q7Z4V5-4|HDGR2_HUMAN, sp|Q7Z4V5|HDGR2_HUMAN	1	0	MS/MS	STY:79.9663@ARGDS(0.9268)EALDEES(0.0732);
ARGLEVTDDSPK	ARGLEVT[79.9663]DDS[79.9663]PK	R	Y	483	494	12	2	10S(79.9663),7T(79.9663)	sp|P49588-2|SYAC_HUMAN	P49588-2	SYAC_HUMAN	AARS1	Isoform 2 of Alanine--tRNA ligase, cytoplasmic		sp|P49588|SYAC_HUMAN	1	0	MS/MS	STY:79.9663@ARGLEVT(1.0000)DDS(1.0000)PK;
ARHDSPDLAPNVTYSLPR	ARHDS[79.9663]PDLAPNVTYSLPR	R	T	267	284	18	3	5S(79.9663)	sp|Q9BRD0|BUD13_HUMAN	Q9BRD0	BUD13_HUMAN	BUD13	BUD13 homolog			1	0	MS/MS	STY:79.9663@ARHDS(0.8095)PDLAPNVT(0.0635)Y(0.0635)S(0.0635)LPR;
ARQPLSEASNQQPLSGGEEK	ARQPLSEASNQQPLS[79.9663]GGEEK	R	S	40	59	20	3	15S(79.9663)	sp|Q9NQW6-2|ANLN_HUMAN	Q9NQW6-2	ANLN_HUMAN	ANLN	Isoform 2 of Anillin		sp|Q9NQW6|ANLN_HUMAN	1	1.70522e+06	MS/MS	STY:79.9663@ARQPLS(0.0374)EAS(0.0393)NQQPLS(0.9233)GGEEK;
ARSPSVAAMASPQLCR	ARS[79.9663]PSVAAMASPQLC[57.0215]R	R	A	13	28	16	2,3	15C(57.0215),3S(79.9663)	sp|P25325-2|THTM_HUMAN	P25325-2	THTM_HUMAN	MPST	Isoform 2 of 3-mercaptopyruvate sulfurtransferase			3	4380186	MS/MS	STY:79.9663@ARS(0.8168)PS(0.1416)VAAMAS(0.0416)PQLCR;
ARSPSVAAMASPQLCR	ARS[79.9663]PSVAAM[15.9949]ASPQLC[57.0215]R	R	A	13	28	16	3	15C(57.0215),3S(79.9663),9M(15.9949)	sp|P25325-2|THTM_HUMAN	P25325-2	THTM_HUMAN	MPST	Isoform 2 of 3-mercaptopyruvate sulfurtransferase			1	2.90069e+06	MS/MS	STY:79.9663@ARS(0.4679)PS(0.4679)VAAMAS(0.0641)PQLCR;M:15.9949@ARSPSVAAM(1.0000)ASPQLCR;
ARSRTPPSAPSQSR	ARS[79.9663]RT[79.9663]PPSAPSQSR	R	M	2405	2418	14	2	3S(79.9663),5T(79.9663)	sp|Q9UQ35|SRRM2_HUMAN	Q9UQ35	SRRM2_HUMAN	SRRM2	Serine/arginine repetitive matrix protein 2			1	2.9583056E7	MS/MS	STY:79.9663@ARS(0.9330)RT(0.9329)PPS(0.0447)APS(0.0447)QS(0.0447)R;
ARSVSPPPK	ARS[79.9663]VS[79.9663]PPPK	K	R	312	320	9	2	3S(79.9663),5S(79.9663)	sp|Q13247|SRSF6_HUMAN	Q13247	SRSF6_HUMAN	SRSF6	Serine/arginine-rich splicing factor 6			20	6.2305677E8	MS/MS	STY:79.9663@ARS(1.0000)VS(1.0000)PPPK;
ARSVSPPPKR	ARS[79.9663]VS[79.9663]PPPKR	K	A	312	321	10	2	3S(79.9663),5S(79.9663)	sp|Q13247|SRSF6_HUMAN	Q13247	SRSF6_HUMAN	SRSF6	Serine/arginine-rich splicing factor 6			2	4.6505876E7	MS/MS	STY:79.9663@ARS(1.0000)VS(1.0000)PPPKR;
ASAPSPNAQVACDHCLK	ASAPS[79.9663]PNAQVAC[57.0215]DHC[57.0215]LK	R	E	96	112	17	2	12C(57.0215),15C(57.0215),5S(79.9663)	sp|Q14258|TRI25_HUMAN	Q14258	TRI25_HUMAN	TRIM25	E3 ubiquitin/ISG15 ligase TRIM25			1	1873541	MS/MS	STY:79.9663@AS(0.3467)APS(0.6533)PNAQVACDHCLK;
ASASRPQPAPADGADPPPAEEPEARPDGEGSPGK	ASASRPQPAPADGADPPPAEEPEARPDGEGS[79.9663]PGK	R	A	92	125	34	4	31S(79.9663)	sp|P11274-2|BCR_HUMAN	P11274-2	BCR_HUMAN	BCR	Isoform 2 of Breakpoint cluster region protein		sp|P11274|BCR_HUMAN	1	0	MS/MS	STY:79.9663@AS(0.2903)AS(0.2903)RPQPAPADGADPPPAEEPEARPDGEGS(0.4194)PGK;
ASAVSELSPR	ASAVSELS[79.9663]PR	R	E	236	245	10	2	8S(79.9663)	sp|Q9Y2W1|TR150_HUMAN	Q9Y2W1	TR150_HUMAN	THRAP3	Thyroid hormone receptor-associated protein 3			4	4.2213244E7	MS/MS	STY:79.9663@AS(0.0297)AVS(0.0301)ELS(0.9403)PR;
ASAVSELSPR	ASAVS[79.9663]ELSPR	R	E	236	245	10	2	5S(79.9663)	sp|Q9Y2W1|TR150_HUMAN	Q9Y2W1	TR150_HUMAN	THRAP3	Thyroid hormone receptor-associated protein 3			2	4.2213244E7	MS/MS	STY:79.9663@AS(0.0206)AVS(0.4897)ELS(0.4897)PR;
ASDPDEAGGPEGSEAVQSGTPEEPEPELEAEASK	ASDPDEAGGPEGSEAVQS[79.9663]GTPEEPEPELEAEASK	R	E	192	225	34	3	18S(79.9663)	sp|O60936-3|NOL3_HUMAN	O60936-3	NOL3_HUMAN	NOL3	Isoform 3 of Nucleolar protein 3		sp|O60936|NOL3_HUMAN	1	0	MS/MS	STY:79.9663@AS(0.0760)DPDEAGGPEGS(0.0248)EAVQS(0.4414)GT(0.4414)PEEPEPELEAEAS(0.0164)K;
ASGQAFELILSPR	ASGQAFELILS[79.9663]PR	R	S	15	27	13	2	11S(79.9663)	sp|P16949-2|STMN1_HUMAN	P16949-2	STMN1_HUMAN	STMN1	Isoform 2 of Stathmin		sp|P16949|STMN1_HUMAN	3	3.433118E7	MS/MS	STY:79.9663@AS(0.0584)GQAFELILS(0.9416)PR;
ASLGSLEGEAEAEASSPK	ASLGSLEGEAEAEAS[79.9663]SPK	K	G	5748	5765	18	2	15S(79.9663)	sp|Q09666|AHNK_HUMAN	Q09666	AHNK_HUMAN	AHNAK	Neuroblast differentiation-associated protein AHNAK			3	4.8412488E7	MS/MS	STY:79.9663@AS(0.0137)LGS(0.0137)LEGEAEAEAS(0.4863)S(0.4863)PK;
ASLGSLEGEAEAEASSPK	ASLGS[79.9663]LEGEAEAEASSPK	K	G	5748	5765	18	2	5S(79.9663)	sp|Q09666|AHNK_HUMAN	Q09666	AHNK_HUMAN	AHNAK	Neuroblast differentiation-associated protein AHNAK			1	4.796168E7	MS/MS	STY:79.9663@AS(0.0491)LGS(0.5877)LEGEAEAEAS(0.1816)S(0.1816)PK;
ASMSEFLESEDGEVEQQR	ASMSEFLES[79.9663]EDGEVEQQR	K	T	538	555	18	2	9S(79.9663)	sp|Q15022|SUZ12_HUMAN	Q15022	SUZ12_HUMAN	SUZ12	Polycomb protein SUZ12			1	0	MS/MS	STY:79.9663@AS(0.0381)MS(0.0381)EFLES(0.9238)EDGEVEQQR;
ASPATQPPPLLPPSATGPDATVGGPAPTPLLPPSATASVK	ASPATQPPPLLPPS[79.9663]ATGPDATVGGPAPTPLLPPSATASVK	R	M	57	96	40	3	14S(79.9663)	sp|Q07666|KHDR1_HUMAN	Q07666	KHDR1_HUMAN	KHDRBS1	KH domain-containing, RNA-binding, signal transduction-associated protein 1		sp|Q07666-3|KHDR1_HUMAN	1	0	MS/MS	STY:79.9663@AS(0.0060)PAT(0.0060)QPPPLLPPS(0.3186)AT(0.3186)GPDAT(0.3186)VGGPAPT(0.0148)PLLPPS(0.0058)AT(0.0058)AS(0.0058)VK;
ASPITNDGEDEFVPSDGLDKDEYTFSPGK	ASPITNDGEDEFVPSDGLDKDEYTFS[79.9663]PGK	K	S	1394	1422	29	3	26S(79.9663)	sp|Q02880-2|TOP2B_HUMAN	Q02880-2	TOP2B_HUMAN	TOP2B	Isoform Beta-1 of DNA topoisomerase 2-beta		sp|Q02880|TOP2B_HUMAN	1	0	MS/MS	STY:79.9663@AS(0.1334)PIT(0.1633)NDGEDEFVPS(0.2705)DGLDKDEY(0.0585)T(0.0585)FS(0.3157)PGK;
ASPITNDGEDEFVPSDGLDKDEYTFSPGK	ASPITNDGEDEFVPS[79.9663]DGLDKDEYTFS[79.9663]PGK	K	S	1394	1422	29	3	15S(79.9663),26S(79.9663)	sp|Q02880-2|TOP2B_HUMAN	Q02880-2	TOP2B_HUMAN	TOP2B	Isoform Beta-1 of DNA topoisomerase 2-beta		sp|Q02880|TOP2B_HUMAN	1	0	MS/MS	STY:79.9663@AS(0.1035)PIT(0.1035)NDGEDEFVPS(0.7005)DGLDKDEY(0.2231)T(0.2231)FS(0.6462)PGK;
ASPRPWTPEDPWSLYGPSPGGR	ASPRPWTPEDPWS[79.9663]LYGPSPGGR	R	G	208	229	22	3	13S(79.9663)	sp|Q14934-10|NFAC4_HUMAN	Q14934-10	NFAC4_HUMAN	NFATC4	Isoform 10 of Nuclear factor of activated T-cells, cytoplasmic 4		sp|Q14934-11|NFAC4_HUMAN, sp|Q14934-12|NFAC4_HUMAN, sp|Q14934-13|NFAC4_HUMAN, sp|Q14934-14|NFAC4_HUMAN, sp|Q14934-15|NFAC4_HUMAN, sp|Q14934-16|NFAC4_HUMAN, sp|Q14934-17|NFAC4_HUMAN, sp|Q14934-18|NFAC4_HUMAN, sp|Q14934-2|NFAC4_HUMAN, sp|Q14934-3|NFAC4_HUMAN, sp|Q14934-4|NFAC4_HUMAN, sp|Q14934-5|NFAC4_HUMAN, sp|Q14934-6|NFAC4_HUMAN, sp|Q14934-7|NFAC4_HUMAN, sp|Q14934-8|NFAC4_HUMAN, sp|Q14934-9|NFAC…	1	0	MS/MS	STY:79.9663@AS(0.0460)PRPWT(0.0979)PEDPWS(0.8066)LY(0.0248)GPS(0.0248)PGGR;
ASRVPSSDEEVVEEPQSR	ASRVPS[79.9663]SDEEVVEEPQS[79.9663]R	R	R	1615	1632	18	2	17S(79.9663),6S(79.9663)	sp|Q9C0C2|TB182_HUMAN	Q9C0C2	TB182_HUMAN	TNKS1BP1	182 kDa tankyrase-1-binding protein			1	1.5427624E7	MS/MS	STY:79.9663@AS(0.0505)RVPS(0.6481)S(0.6481)DEEVVEEPQS(0.6533)R;
ASRVPSSDEEVVEEPQSR	ASRVPS[79.9663]S[79.9663]DEEVVEEPQSR	R	R	1615	1632	18	3	6S(79.9663),7S(79.9663)	sp|Q9C0C2|TB182_HUMAN	Q9C0C2	TB182_HUMAN	TNKS1BP1	182 kDa tankyrase-1-binding protein			2	9790452	MS/MS	STY:79.9663@AS(0.0665)RVPS(0.8321)S(0.8372)DEEVVEEPQS(0.2641)R;
ASSHSSQTQGGGSVTK	ASSHSSQTQGGGS[79.9663]VTK	R	K	402	417	16	2	13S(79.9663)	sp|P02545|LMNA_HUMAN	P02545	LMNA_HUMAN	LMNA	Prelamin-A/C		sp|P02545-2|LMNA_HUMAN, sp|P02545-3|LMNA_HUMAN, sp|P02545-4|LMNA_HUMAN, sp|P02545-5|LMNA_HUMAN, sp|P02545-6|LMNA_HUMAN	2	4.32447584E8	MS/MS	STY:79.9663@AS(0.0199)S(0.0199)HS(0.0199)S(0.0199)QT(0.0199)QGGGS(0.8903)VT(0.0102)K;
ASSHSSQTQGGGSVTK	ASSHS[79.9663]S[79.9663]QTQGGGSVTK	R	K	402	417	16	2	5S(79.9663),6S(79.9663)	sp|P02545|LMNA_HUMAN	P02545	LMNA_HUMAN	LMNA	Prelamin-A/C		sp|P02545-2|LMNA_HUMAN, sp|P02545-3|LMNA_HUMAN, sp|P02545-4|LMNA_HUMAN, sp|P02545-5|LMNA_HUMAN, sp|P02545-6|LMNA_HUMAN	1	0	MS/MS	STY:79.9663@AS(0.0419)S(0.0419)HS(0.3833)S(0.3833)QT(0.3833)QGGGS(0.3833)VT(0.3833)K;
ASSPSPLTIGTPESQR	ASSPSPLTIGT[79.9663]PESQR	K	K	483	498	16	2	11T(79.9663)	sp|Q9NPI6-2|DCP1A_HUMAN	Q9NPI6-2	DCP1A_HUMAN	DCP1A	Isoform 2 of mRNA-decapping enzyme 1A		sp|Q9NPI6|DCP1A_HUMAN	1	0	MS/MS	STY:79.9663@AS(0.0159)S(0.0159)PS(0.0159)PLT(0.0164)IGT(0.9212)PES(0.0146)QR;
ASSLSESSPPK	ASS[79.9663]LSESSPPK	R	A	207	217	11	2	3S(79.9663)	sp|Q9UHB6-2|LIMA1_HUMAN	Q9UHB6-2	LIMA1_HUMAN	LIMA1	Isoform Alpha of LIM domain and actin-binding protein 1		sp|Q9UHB6-3|LIMA1_HUMAN, sp|Q9UHB6-4|LIMA1_HUMAN, sp|Q9UHB6-5|LIMA1_HUMAN, sp|Q9UHB6|LIMA1_HUMAN	1	4919018	MS/MS	STY:79.9663@AS(0.0071)S(0.2482)LS(0.2482)ES(0.2482)S(0.2482)PPK;
ASSLSESSPPK	ASS[79.9663]LS[79.9663]ESSPPK	R	A	207	217	11	2	3S(79.9663),5S(79.9663)	sp|Q9UHB6-2|LIMA1_HUMAN	Q9UHB6-2	LIMA1_HUMAN	LIMA1	Isoform Alpha of LIM domain and actin-binding protein 1		sp|Q9UHB6-3|LIMA1_HUMAN, sp|Q9UHB6-4|LIMA1_HUMAN, sp|Q9UHB6-5|LIMA1_HUMAN, sp|Q9UHB6|LIMA1_HUMAN	1	2.80502e+06	MS/MS	STY:79.9663@AS(0.2119)S(0.4470)LS(0.4470)ES(0.4470)S(0.4470)PPK;
ASVSPMDEPVPDSESPIEK	ASVSPMDEPVPDS[79.9663]ESPIEK	R	V	1375	1393	19	2	13S(79.9663)	sp|P46821|MAP1B_HUMAN	P46821	MAP1B_HUMAN	MAP1B	Microtubule-associated protein 1B			2	1.0381576E7	MS/MS	STY:79.9663@AS(0.0410)VS(0.0410)PMDEPVPDS(0.4590)ES(0.4590)PIEK;
ASVVDPSTESSPAPQEGSEQPASPASPLSSR	ASVVDPSTESSPAPQEGSEQPASPAS[79.9663]PLSSR	K	Q	410	440	31	3	26S(79.9663)	sp|Q66K14-2|TBC9B_HUMAN	Q66K14-2	TBC9B_HUMAN	TBC1D9B	Isoform 2 of TBC1 domain family member 9B		sp|Q66K14|TBC9B_HUMAN	1	0	MS/MS	STY:79.9663@AS(0.0128)VVDPS(0.0083)T(0.0083)ES(0.0055)S(0.0070)PAPQEGS(0.0070)EQPAS(0.0101)PAS(0.3137)PLS(0.3137)S(0.3137)R;
ASYHFSPEELDENTSPLLGDAR	ASYHFSPEELDENT[79.9663]SPLLGDAR	K	F	262	283	22	3	14T(79.9663)	sp|O75410-2|TACC1_HUMAN	O75410-2	TACC1_HUMAN	TACC1	Isoform 2 of Transforming acidic coiled-coil-containing protein 1		sp|O75410-3|TACC1_HUMAN, sp|O75410-7|TACC1_HUMAN, sp|O75410-9|TACC1_HUMAN, sp|O75410|TACC1_HUMAN	1	1.89327e+06	MS/MS	STY:79.9663@AS(0.0147)Y(0.0147)HFS(0.0147)PEELDENT(0.4779)S(0.4779)PLLGDAR;
ASALLFSSDEEDQWNIPASQTHLASDSR	AS[79.9663]ALLFSSDEEDQWNIPASQTHLASDSR	K	S	613	640	28	3	2S(79.9663)	sp|Q641Q2-2|WAC2A_HUMAN	Q641Q2-2	WAC2A_HUMAN	WASHC2A	Isoform 2 of WASH complex subunit 2A	WASHC2C	sp|Q641Q2|WAC2A_HUMAN, sp|Q9Y4E1-4|WAC2C_HUMAN, sp|Q9Y4E1-5|WAC2C_HUMAN, sp|Q9Y4E1-6|WAC2C_HUMAN, sp|Q9Y4E1|WAC2C_HUMAN	1	1.40923E7	MS/MS	STY:79.9663@AS(0.3028)ALLFS(0.3028)S(0.3028)DEEDQWNIPAS(0.0360)QT(0.0360)HLAS(0.0124)DS(0.0073)R;
ASALLFSSDEEDQWNIPASQTHLASDSR	AS[79.9663]ALLFS[79.9663]SDEEDQWNIPASQTHLASDSR	K	S	613	640	28	3	2S(79.9663),7S(79.9663)	sp|Q641Q2-2|WAC2A_HUMAN	Q641Q2-2	WAC2A_HUMAN	WASHC2A	Isoform 2 of WASH complex subunit 2A	WASHC2C	sp|Q641Q2|WAC2A_HUMAN, sp|Q9Y4E1-4|WAC2C_HUMAN, sp|Q9Y4E1-5|WAC2C_HUMAN, sp|Q9Y4E1-6|WAC2C_HUMAN, sp|Q9Y4E1|WAC2C_HUMAN	1	0	MS/MS	STY:79.9663@AS(0.5330)ALLFS(0.4418)S(0.4418)DEEDQWNIPAS(0.1676)QT(0.1676)HLAS(0.1241)DS(0.1241)R;
ASAVSELSPR	AS[79.9663]AVSELSPR	R	E	236	245	10	2	2S(79.9663)	sp|Q9Y2W1|TR150_HUMAN	Q9Y2W1	TR150_HUMAN	THRAP3	Thyroid hormone receptor-associated protein 3			2	4.2213244E7	MS/MS	STY:79.9663@AS(0.3333)AVS(0.3333)ELS(0.3333)PR;
ASGVAVSDGVIK	AS[79.9663]GVAVSDGVIK	M	V	2	13	12	2	2S(79.9663)	sp|P23528|COF1_HUMAN	P23528	COF1_HUMAN	CFL1	Cofilin-1			1	4.40318e+06	MS/MS	STY:79.9663@AS(0.8445)GVAVS(0.1555)DGVIK;
ASLGSLEGEAEAEASSPK	AS[79.9663]LGSLEGEAEAEAS[79.9663]SPK	K	G	5748	5765	18	2	15S(79.9663),2S(79.9663)	sp|Q09666|AHNK_HUMAN	Q09666	AHNK_HUMAN	AHNAK	Neuroblast differentiation-associated protein AHNAK			1	1.5675457E7	MS/MS	STY:79.9663@AS(0.6594)LGS(0.1250)LEGEAEAEAS(0.6078)S(0.6078)PK;
ASPAPGSGHPEGPGAHLDMNSLDR	AS[79.9663]PAPGSGHPEGPGAHLDMNSLDR	R	A	90	113	24	3,4	2S(79.9663)	sp|O94826|TOM70_HUMAN	O94826	TOM70_HUMAN	TOMM70	Mitochondrial import receptor subunit TOM70			4	9.4350936E7	MS/MS	STY:79.9663@AS(0.9395)PAPGS(0.0297)GHPEGPGAHLDMNS(0.0308)LDR;
ASPAPGSGHPEGPGAHLDMNSLDR	AS[79.9663]PAPGSGHPEGPGAHLDM[15.9949]NSLDR	R	A	90	113	24	3	19M(15.9949),2S(79.9663)	sp|O94826|TOM70_HUMAN	O94826	TOM70_HUMAN	TOMM70	Mitochondrial import receptor subunit TOM70			1	1.3343918E7	MS/MS	STY:79.9663@AS(0.9330)PAPGS(0.0308)GHPEGPGAHLDMNS(0.0362)LDR;M:15.9949@ASPAPGSGHPEGPGAHLDM(1.0000)NSLDR;
ASPEPEGEAAGK	AS[79.9663]PEPEGEAAGK	K	M	383	394	12	2	2S(79.9663)	sp|Q8IU81|I2BP1_HUMAN	Q8IU81	I2BP1_HUMAN	IRF2BP1	Interferon regulatory factor 2-binding protein 1			1	0	MS/MS	STY:79.9663@AS(1.0000)PEPEGEAAGK;
ASPPGDLQNPK	AS[79.9663]PPGDLQNPK	K	R	314	324	11	2	2S(79.9663)	sp|O00273|DFFA_HUMAN	O00273	DFFA_HUMAN	DFFA	DNA fragmentation factor subunit alpha			3	1.5782072E7	MS/MS	STY:79.9663@AS(1.0000)PPGDLQNPK;
ASPPPQGPLPGPPGALHR	AS[79.9663]PPPQGPLPGPPGALHR	R	W	39	56	18	3	2S(79.9663)	sp|Q96G74-2|OTUD5_HUMAN	Q96G74-2	OTUD5_HUMAN	OTUD5	Isoform 2 of OTU domain-containing protein 5		sp|Q96G74-3|OTUD5_HUMAN, sp|Q96G74-5|OTUD5_HUMAN, sp|Q96G74|OTUD5_HUMAN	1	0	MS/MS	STY:79.9663@AS(1.0000)PPPQGPLPGPPGALHR;
ASRVPSSDEEVVEEPQSR	AS[79.9663]RVPSS[79.9663]DEEVVEEPQSR	R	R	1615	1632	18	2	2S(79.9663),7S(79.9663)	sp|Q9C0C2|TB182_HUMAN	Q9C0C2	TB182_HUMAN	TNKS1BP1	182 kDa tankyrase-1-binding protein			1	0	MS/MS	STY:79.9663@AS(0.6072)RVPS(0.6072)S(0.6553)DEEVVEEPQS(0.1303)R;
ASRVPSSDEEVVEEPQSR	AS[79.9663]RVPS[79.9663]SDEEVVEEPQSR	R	R	1615	1632	18	2,3	2S(79.9663),6S(79.9663)	sp|Q9C0C2|TB182_HUMAN	Q9C0C2	TB182_HUMAN	TNKS1BP1	182 kDa tankyrase-1-binding protein			3	2.5218076E7	MS/MS	STY:79.9663@AS(0.6279)RVPS(0.6279)S(0.6279)DEEVVEEPQS(0.1164)R;
ASSFADMMGILK	AS[79.9663]SFADMMGILK	K	D	224	235	12	2	2S(79.9663)	sp|Q9H019-3|MFR1L_HUMAN	Q9H019-3	MFR1L_HUMAN	MTFR1L	Isoform 3 of Mitochondrial fission regulator 1-like		sp|Q9H019|MFR1L_HUMAN	2	0	MS/MS	STY:79.9663@AS(0.5000)S(0.5000)FADMMGILK;
ASSHSSQTQGGGSVTK	AS[79.9663]SHSSQTQGGGSVTK	R	K	402	417	16	2	2S(79.9663)	sp|P02545|LMNA_HUMAN	P02545	LMNA_HUMAN	LMNA	Prelamin-A/C		sp|P02545-2|LMNA_HUMAN, sp|P02545-3|LMNA_HUMAN, sp|P02545-4|LMNA_HUMAN, sp|P02545-5|LMNA_HUMAN, sp|P02545-6|LMNA_HUMAN	8	4.46551264E8	MS/MS	STY:79.9663@AS(0.2458)S(0.2458)HS(0.2458)S(0.2458)QT(0.0080)QGGGS(0.0045)VT(0.0045)K;
ASSHSSQTQGGGSVTK	AS[79.9663]SHSSQTQGGGS[79.9663]VTK	R	K	402	417	16	2	13S(79.9663),2S(79.9663)	sp|P02545|LMNA_HUMAN	P02545	LMNA_HUMAN	LMNA	Prelamin-A/C		sp|P02545-2|LMNA_HUMAN, sp|P02545-3|LMNA_HUMAN, sp|P02545-4|LMNA_HUMAN, sp|P02545-5|LMNA_HUMAN, sp|P02545-6|LMNA_HUMAN	1	8.5619792E7	MS/MS	STY:79.9663@AS(0.3187)S(0.3187)HS(0.3187)S(0.3187)QT(0.3187)QGGGS(0.3857)VT(0.0207)K;
ASSLEDLVLK	AS[79.9663]SLEDLVLK	R	E	254	263	10	2	2S(79.9663)	sp|Q15477|SKI2_HUMAN	Q15477	SKI2_HUMAN	SKIC2	Superkiller complex protein 2			4	1.5533269E7	MS/MS	STY:79.9663@AS(0.8783)S(0.1217)LEDLVLK;
ASSLGEIDESSELR	AS[79.9663]SLGEIDESSELR	R	V	565	578	14	2	2S(79.9663)	sp|Q16513-2|PKN2_HUMAN	Q16513-2	PKN2_HUMAN	PKN2	Isoform 2 of Serine/threonine-protein kinase N2		sp|Q16513-3|PKN2_HUMAN, sp|Q16513-4|PKN2_HUMAN, sp|Q16513-5|PKN2_HUMAN, sp|Q16513|PKN2_HUMAN	1	4262893	MS/MS	STY:79.9663@AS(0.4868)S(0.4868)LGEIDES(0.0132)S(0.0132)ELR;
ASSLSESSPPK	AS[79.9663]SLSESSPPK	R	A	207	217	11	2	2S(79.9663)	sp|Q9UHB6-2|LIMA1_HUMAN	Q9UHB6-2	LIMA1_HUMAN	LIMA1	Isoform Alpha of LIM domain and actin-binding protein 1		sp|Q9UHB6-3|LIMA1_HUMAN, sp|Q9UHB6-4|LIMA1_HUMAN, sp|Q9UHB6-5|LIMA1_HUMAN, sp|Q9UHB6|LIMA1_HUMAN	1	4919018	MS/MS	STY:79.9663@AS(0.2000)S(0.2000)LS(0.2000)ES(0.2000)S(0.2000)PPK;
ASSPPDRIDIFGR	AS[79.9663]SPPDRIDIFGR	R	T	75	87	13	2	2S(79.9663)	sp|Q9NWB6-2|ARGL1_HUMAN	Q9NWB6-2	ARGL1_HUMAN	ARGLU1	Isoform 2 of Arginine and glutamate-rich protein 1		sp|Q9NWB6|ARGL1_HUMAN	2	4.3805196E7	MS/MS	STY:79.9663@AS(0.5000)S(0.5000)PPDRIDIFGR;
ASSVTTFTGEPNTCPR	AS[79.9663]SVTTFTGEPNTC[57.0215]PR	R	C	187	202	16	2	14C(57.0215),2S(79.9663)	sp|P52943-2|CRIP2_HUMAN	P52943-2	CRIP2_HUMAN	CRIP2	Isoform 2 of Cysteine-rich protein 2		sp|P52943|CRIP2_HUMAN	1	0	MS/MS	STY:79.9663@AS(0.2475)S(0.2475)VT(0.2475)T(0.2475)FT(0.0050)GEPNT(0.0050)CPR;
ASSHSSQTQGGGSVTK	AS[79.9663]S[79.9663]HSSQTQGGGSVTK	R	K	402	417	16	2	2S(79.9663),3S(79.9663)	sp|P02545|LMNA_HUMAN	P02545	LMNA_HUMAN	LMNA	Prelamin-A/C		sp|P02545-2|LMNA_HUMAN, sp|P02545-3|LMNA_HUMAN, sp|P02545-4|LMNA_HUMAN, sp|P02545-5|LMNA_HUMAN, sp|P02545-6|LMNA_HUMAN	5	8.5619792E7	MS/MS	STY:79.9663@AS(0.4741)S(0.4741)HS(0.4741)S(0.4741)QT(0.0345)QGGGS(0.0345)VT(0.0345)K;
ASSHSSQTQGGGSVTKK	AS[79.9663]S[79.9663]HSSQTQGGGSVTKK	R	R	402	418	17	2	2S(79.9663),3S(79.9663)	sp|P02545|LMNA_HUMAN	P02545	LMNA_HUMAN	LMNA	Prelamin-A/C		sp|P02545-2|LMNA_HUMAN, sp|P02545-3|LMNA_HUMAN, sp|P02545-4|LMNA_HUMAN, sp|P02545-5|LMNA_HUMAN, sp|P02545-6|LMNA_HUMAN	1	8848635	MS/MS	STY:79.9663@AS(0.4599)S(0.4599)HS(0.1854)S(0.3143)QT(0.3143)QGGGS(0.1331)VT(0.1331)KK;
ASTASPCNNNINAATAVALQEPR	AS[79.9663]TASPC[57.0215]NNNINAATAVALQEPR	R	K	592	614	23	3	2S(79.9663),7C(57.0215)	sp|Q71RC2-3|LARP4_HUMAN	Q71RC2-3	LARP4_HUMAN	LARP4	Isoform 3 of La-related protein 4		sp|Q71RC2-4|LARP4_HUMAN, sp|Q71RC2-5|LARP4_HUMAN, sp|Q71RC2-6|LARP4_HUMAN, sp|Q71RC2|LARP4_HUMAN	1	0	MS/MS	STY:79.9663@AS(0.3303)T(0.3303)AS(0.3303)PCNNNINAAT(0.0092)AVALQEPR;
ATAPQTQHVSPMR	ATAPQTQHVS[79.9663]PMR	R	Q	124	136	13	2	10S(79.9663)	sp|P29692|EF1D_HUMAN	P29692	EF1D_HUMAN	EEF1D	Elongation factor 1-delta		sp|P29692-2|EF1D_HUMAN, sp|P29692-3|EF1D_HUMAN, sp|P29692-4|EF1D_HUMAN	5	1.51025248E8	MS/MS	STY:79.9663@AT(0.0320)APQT(0.0320)QHVS(0.9360)PMR;
ATAPQTQHVSPMRQVEPPAK	ATAPQTQHVS[79.9663]PMRQVEPPAK	R	K	124	143	20	3	10S(79.9663)	sp|P29692|EF1D_HUMAN	P29692	EF1D_HUMAN	EEF1D	Elongation factor 1-delta		sp|P29692-2|EF1D_HUMAN, sp|P29692-3|EF1D_HUMAN, sp|P29692-4|EF1D_HUMAN	1	1.5453144E7	MS/MS	STY:79.9663@AT(0.4103)APQT(0.0474)QHVS(0.5423)PMRQVEPPAK;
ATAPQTQHVSPMR	ATAPQTQHVS[79.9663]PM[15.9949]R	R	Q	124	136	13	2	10S(79.9663),12M(15.9949)	sp|P29692|EF1D_HUMAN	P29692	EF1D_HUMAN	EEF1D	Elongation factor 1-delta		sp|P29692-2|EF1D_HUMAN, sp|P29692-3|EF1D_HUMAN, sp|P29692-4|EF1D_HUMAN	1	1.4046046E7	MS/MS	STY:79.9663@AT(0.0823)APQT(0.2138)QHVS(0.7039)PMR;M:15.9949@ATAPQTQHVSPM(1.0000)R;
ATAPQTQHVSPMRQVEPPAK	ATAPQTQHVS[79.9663]PM[15.9949]RQVEPPAK	R	K	124	143	20	3	10S(79.9663),12M(15.9949)	sp|P29692|EF1D_HUMAN	P29692	EF1D_HUMAN	EEF1D	Elongation factor 1-delta		sp|P29692-2|EF1D_HUMAN, sp|P29692-3|EF1D_HUMAN, sp|P29692-4|EF1D_HUMAN	1	3.0381292E7	MS/MS	STY:79.9663@AT(0.0472)APQT(0.0472)QHVS(0.9057)PMRQVEPPAK;M:15.9949@ATAPQTQHVSPM(1.0000)RQVEPPAK;
ATAPQTQHVSPMR	ATAPQT[79.9663]QHVSPMR	R	Q	124	136	13	2	6T(79.9663)	sp|P29692|EF1D_HUMAN	P29692	EF1D_HUMAN	EEF1D	Elongation factor 1-delta		sp|P29692-2|EF1D_HUMAN, sp|P29692-3|EF1D_HUMAN, sp|P29692-4|EF1D_HUMAN	2	5.8071864E7	MS/MS	STY:79.9663@AT(0.3254)APQT(0.6098)QHVS(0.0648)PMR;
ATAPQTQHVSPMR	ATAPQT[79.9663]QHVSPM[15.9949]R	R	Q	124	136	13	2	12M(15.9949),6T(79.9663)	sp|P29692|EF1D_HUMAN	P29692	EF1D_HUMAN	EEF1D	Elongation factor 1-delta		sp|P29692-2|EF1D_HUMAN, sp|P29692-3|EF1D_HUMAN, sp|P29692-4|EF1D_HUMAN	2	2.9485068E7	MS/MS	STY:79.9663@AT(0.0822)APQT(0.8409)QHVS(0.0769)PMR;M:15.9949@ATAPQTQHVSPM(1.0000)R;
ATAPQTQHVSPMRQVEPPAK	ATAPQT[79.9663]QHVSPM[15.9949]RQVEPPAK	R	K	124	143	20	3	12M(15.9949),6T(79.9663)	sp|P29692|EF1D_HUMAN	P29692	EF1D_HUMAN	EEF1D	Elongation factor 1-delta		sp|P29692-2|EF1D_HUMAN, sp|P29692-3|EF1D_HUMAN, sp|P29692-4|EF1D_HUMAN	1	0	MS/MS	STY:79.9663@AT(0.0285)APQT(0.4858)QHVS(0.4858)PMRQVEPPAK;M:15.9949@ATAPQTQHVSPM(1.0000)RQVEPPAK;
ATAQPPAPLSPDSGSPSPDSGSASPVEEEDVGSSEK	ATAQPPAPLSPDSGSPSPDSGSASPVEEEDVGS[79.9663]SEK	R	L	15	50	36	3	33S(79.9663)	sp|O95361|TRI16_HUMAN	O95361	TRI16_HUMAN	TRIM16	Tripartite motif-containing protein 16			1	0	MS/MS	STY:79.9663@AT(0.1330)AQPPAPLS(0.0686)PDS(0.0686)GS(0.0686)PS(0.0686)PDS(0.1070)GS(0.1070)AS(0.1070)PVEEEDVGS(0.1358)S(0.1358)EK;
ATAQPPAPLSPDSGSPSPDSGSASPVEEEDVGSSEK	ATAQPPAPLSPDSGSPSPDS[79.9663]GSASPVEEEDVGSSEK	R	L	15	50	36	3	20S(79.9663)	sp|O95361|TRI16_HUMAN	O95361	TRI16_HUMAN	TRIM16	Tripartite motif-containing protein 16			1	7974755	MS/MS	STY:79.9663@AT(0.0307)AQPPAPLS(0.0077)PDS(0.0077)GS(0.0346)PS(0.0346)PDS(0.1996)GS(0.1996)AS(0.1996)PVEEEDVGS(0.1231)S(0.1628)EK;
ATAQPPAPLSPDSGSPSPDSGSASPVEEEDVGSSEK	ATAQPPAPLSPDSGSPSPDS[79.9663]GS[79.9663]AS[79.9663]PVEEEDVGSSEK	R	L	15	50	36	3	20S(79.9663),22S(79.9663),24S(79.9663)	sp|O95361|TRI16_HUMAN	O95361	TRI16_HUMAN	TRIM16	Tripartite motif-containing protein 16			1	0	MS/MS	STY:79.9663@AT(0.2683)AQPPAPLS(0.2683)PDS(0.0615)GS(0.0615)PS(0.0615)PDS(0.5089)GS(0.5101)AS(0.4793)PVEEEDVGS(0.3902)S(0.3902)EK;
ATEDGEEDEVSAGEK	ATEDGEEDEVS[79.9663]AGEK	K	E	1425	1439	15	2	11S(79.9663)	sp|Q9BXW9|FACD2_HUMAN	Q9BXW9	FACD2_HUMAN	FANCD2	Fanconi anemia group D2 protein			1	1.0291917E7	MS/MS	STY:79.9663@AT(0.0800)EDGEEDEVS(0.9200)AGEK;
ATGGLCLLGAYADSDDDDNDVSEK	ATGGLC[57.0215]LLGAY[79.9663]ADSDDDDNDVSEK	K	L	105	128	24	3	11Y(79.9663),6C(57.0215)	sp|Q8N3X1-2|FNBP4_HUMAN	Q8N3X1-2	FNBP4_HUMAN	FNBP4	Isoform 2 of Formin-binding protein 4		sp|Q8N3X1|FNBP4_HUMAN	1	6626362	MS/MS	STY:79.9663@AT(0.0189)GGLCLLGAY(0.3270)ADS(0.3270)DDDDNDVS(0.3270)EK;
ATNESEDEIPQLVPIGK	ATNES[79.9663]EDEIPQLVPIGK	K	K	137	153	17	2	5S(79.9663)	sp|O76021-2|RL1D1_HUMAN	O76021-2	RL1D1_HUMAN	RSL1D1	Isoform 2 of Ribosomal L1 domain-containing protein 1		sp|O76021|RL1D1_HUMAN	1	8.5815096E7	MS/MS	STY:79.9663@AT(0.0701)NES(0.9299)EDEIPQLVPIGK;
ATNESEDEIPQLVPIGKK	ATNES[79.9663]EDEIPQLVPIGKK	K	T	137	154	18	3	5S(79.9663)	sp|O76021-2|RL1D1_HUMAN	O76021-2	RL1D1_HUMAN	RSL1D1	Isoform 2 of Ribosomal L1 domain-containing protein 1		sp|O76021|RL1D1_HUMAN	1	0	MS/MS	STY:79.9663@AT(0.2129)NES(0.7871)EDEIPQLVPIGKK;
ATSNVFAMFDQSQIQEFK	ATSNVFAMFDQS[79.9663]QIQEFK	R	E	18	35	18	2	12S(79.9663)	sp|O14950|ML12B_HUMAN	O14950	ML12B_HUMAN	MYL12B	Myosin regulatory light chain 12B	MYL12A, MYL9	sp|P19105|ML12A_HUMAN, sp|P24844-2|MYL9_HUMAN, sp|P24844|MYL9_HUMAN	1	0	MS/MS	STY:79.9663@AT(0.0538)S(0.0538)NVFAMFDQS(0.8924)QIQEFK;
ATSSSNPSSPAPDWYK	ATSS[79.9663]SNPSS[79.9663]PAPDWYK	K	D	1950	1965	16	2	4S(79.9663),9S(79.9663)	sp|P46100-4|ATRX_HUMAN	P46100-4	ATRX_HUMAN	ATRX	Isoform 3 of Transcriptional regulator ATRX		sp|P46100-2|ATRX_HUMAN, sp|P46100-3|ATRX_HUMAN, sp|P46100-5|ATRX_HUMAN, sp|P46100|ATRX_HUMAN	1	1.4371796E7	MS/MS	STY:79.9663@AT(0.1221)S(0.1221)S(0.4130)S(0.4130)NPS(0.4130)S(0.5027)PAPDWY(0.0142)K;
ATSNVFAMFDQSQIQEFK	ATS[79.9663]NVFAM[15.9949]FDQSQIQEFK	R	E	18	35	18	3	3S(79.9663),8M(15.9949)	sp|O14950|ML12B_HUMAN	O14950	ML12B_HUMAN	MYL12B	Myosin regulatory light chain 12B	MYL12A, MYL9	sp|P19105|ML12A_HUMAN, sp|P24844-2|MYL9_HUMAN, sp|P24844|MYL9_HUMAN	1	0	MS/MS	STY:79.9663@AT(0.0352)S(0.4824)NVFAMFDQS(0.4824)QIQEFK;M:15.9949@ATSNVFAM(1.0000)FDQSQIQEFK;
ATVTPSPVK	ATVTPS[79.9663]PVK	K	G	176	184	9	2	6S(79.9663)	sp|Q9H1E3|NUCKS_HUMAN	Q9H1E3	NUCKS_HUMAN	NUCKS1	Nuclear ubiquitous casein and cyclin-dependent kinase substrate 1		sp|Q9H1E3-2|NUCKS_HUMAN	2	2.831117E7	MS/MS	STY:79.9663@AT(0.0334)VT(0.0334)PS(0.9332)PVK;
ATVTPSPVK	ATVT[79.9663]PSPVK	K	G	176	184	9	2	4T(79.9663)	sp|Q9H1E3|NUCKS_HUMAN	Q9H1E3	NUCKS_HUMAN	NUCKS1	Nuclear ubiquitous casein and cyclin-dependent kinase substrate 1		sp|Q9H1E3-2|NUCKS_HUMAN	1	0	MS/MS	STY:79.9663@AT(0.0193)VT(0.4903)PS(0.4903)PVK;
ATVTPSPVK	ATVT[79.9663]PS[79.9663]PVK	K	G	176	184	9	2	4T(79.9663),6S(79.9663)	sp|Q9H1E3|NUCKS_HUMAN	Q9H1E3	NUCKS_HUMAN	NUCKS1	Nuclear ubiquitous casein and cyclin-dependent kinase substrate 1		sp|Q9H1E3-2|NUCKS_HUMAN	1	3.0402956E7	MS/MS	STY:79.9663@AT(0.1111)VT(0.9445)PS(0.9445)PVK;
ATAPQTQHVSPMR	AT[79.9663]APQTQHVSPMR	R	Q	124	136	13	3	2T(79.9663)	sp|P29692|EF1D_HUMAN	P29692	EF1D_HUMAN	EEF1D	Elongation factor 1-delta		sp|P29692-2|EF1D_HUMAN, sp|P29692-3|EF1D_HUMAN, sp|P29692-4|EF1D_HUMAN	1	1.8142788E7	MS/MS	STY:79.9663@AT(0.9191)APQT(0.0404)QHVS(0.0404)PMR;
ATAPQTQHVSPMRQVEPPAK	AT[79.9663]APQTQHVSPMRQVEPPAK	R	K	124	143	20	3	2T(79.9663)	sp|P29692|EF1D_HUMAN	P29692	EF1D_HUMAN	EEF1D	Elongation factor 1-delta		sp|P29692-2|EF1D_HUMAN, sp|P29692-3|EF1D_HUMAN, sp|P29692-4|EF1D_HUMAN	1	1.5453144E7	MS/MS	STY:79.9663@AT(0.4646)APQT(0.4646)QHVS(0.0708)PMRQVEPPAK;
ATAPQTQHVSPMRQVEPPAK	AT[79.9663]APQTQHVSPM[15.9949]RQVEPPAK	R	K	124	143	20	4	12M(15.9949),2T(79.9663)	sp|P29692|EF1D_HUMAN	P29692	EF1D_HUMAN	EEF1D	Elongation factor 1-delta		sp|P29692-2|EF1D_HUMAN, sp|P29692-3|EF1D_HUMAN, sp|P29692-4|EF1D_HUMAN	1	7794457	MS/MS	STY:79.9663@AT(0.8606)APQT(0.0440)QHVS(0.0955)PMRQVEPPAK;M:15.9949@ATAPQTQHVSPM(1.0000)RQVEPPAK;
ATAQPPAPLSPDSGSPSPDSGSASPVEEEDVGSSEK	AT[79.9663]AQPPAPLSPDSGSPSPDS[79.9663]GSASPVEEEDVGSSEK	R	L	15	50	36	3	20S(79.9663),2T(79.9663)	sp|O95361|TRI16_HUMAN	O95361	TRI16_HUMAN	TRIM16	Tripartite motif-containing protein 16			1	1.3631936E7	MS/MS	STY:79.9663@AT(0.5287)AQPPAPLS(0.0452)PDS(0.0665)GS(0.0665)PS(0.0665)PDS(0.3997)GS(0.3997)AS(0.3997)PVEEEDVGS(0.0138)S(0.0138)EK;
ATLGELNTMNNQLSGLSK	AT[79.9663]LGELNTM[15.9949]NNQLSGLSK	R	-	329	346	18	4	2T(79.9663),9M(15.9949)	sp|O75674-2|TM1L1_HUMAN	O75674-2	TM1L1_HUMAN	TOM1L1	Isoform 2 of TOM1-like protein 1			1	0	MS/MS	STY:79.9663@AT(0.2500)LGELNT(0.2500)MNNQLS(0.2500)GLS(0.2500)K;M:15.9949@ATLGELNTM(1.0000)NNQLSGLSK;
ATNESEDEIPQLVPIGK	AT[79.9663]NESEDEIPQLVPIGK	K	K	137	153	17	2,3	2T(79.9663)	sp|O76021-2|RL1D1_HUMAN	O76021-2	RL1D1_HUMAN	RSL1D1	Isoform 2 of Ribosomal L1 domain-containing protein 1		sp|O76021|RL1D1_HUMAN	5	8.5815096E7	MS/MS	STY:79.9663@AT(0.7317)NES(0.2683)EDEIPQLVPIGK;
ATNESEDEIPQLVPIGKK	AT[79.9663]NESEDEIPQLVPIGKK	K	T	137	154	18	2	2T(79.9663)	sp|O76021-2|RL1D1_HUMAN	O76021-2	RL1D1_HUMAN	RSL1D1	Isoform 2 of Ribosomal L1 domain-containing protein 1		sp|O76021|RL1D1_HUMAN	1	0	MS/MS	STY:79.9663@AT(0.5000)NES(0.5000)EDEIPQLVPIGKK;
ATSNVFAMFDQSQIQEFK	AT[79.9663]SNVFAMFDQSQIQEFK	R	E	18	35	18	2	2T(79.9663)	sp|O14950|ML12B_HUMAN	O14950	ML12B_HUMAN	MYL12B	Myosin regulatory light chain 12B	MYL12A, MYL9	sp|P19105|ML12A_HUMAN, sp|P24844-2|MYL9_HUMAN, sp|P24844|MYL9_HUMAN	1	0	MS/MS	STY:79.9663@AT(0.4901)S(0.4901)NVFAMFDQS(0.0199)QIQEFK;
ATSNVFAMFDQSQIQEFK	AT[79.9663]SNVFAM[15.9949]FDQSQIQEFK	R	E	18	35	18	2	2T(79.9663),8M(15.9949)	sp|O14950|ML12B_HUMAN	O14950	ML12B_HUMAN	MYL12B	Myosin regulatory light chain 12B	MYL12A, MYL9	sp|P19105|ML12A_HUMAN, sp|P24844-2|MYL9_HUMAN, sp|P24844|MYL9_HUMAN	2	0	MS/MS	STY:79.9663@AT(0.4875)S(0.4875)NVFAMFDQS(0.0249)QIQEFK;M:15.9949@ATSNVFAM(1.0000)FDQSQIQEFK;
ATSPESTSR	AT[79.9663]SPESTSR	R	S	464	472	9	2	2T(79.9663)	sp|Q8N3X1-2|FNBP4_HUMAN	Q8N3X1-2	FNBP4_HUMAN	FNBP4	Isoform 2 of Formin-binding protein 4		sp|Q8N3X1|FNBP4_HUMAN	1	0	MS/MS	STY:79.9663@AT(0.2000)S(0.2000)PES(0.2000)T(0.2000)S(0.2000)R;
ATSPSSSVSGDFDDGHHSVSTPGPSR	AT[79.9663]SPSSSVSGDFDDGHHSVSTPGPSR	R	K	8	33	26	3	2T(79.9663)	sp|Q86U86-2|PB1_HUMAN	Q86U86-2	PB1_HUMAN	PBRM1	Isoform 2 of Protein polybromo-1		sp|Q86U86-3|PB1_HUMAN, sp|Q86U86-4|PB1_HUMAN, sp|Q86U86-5|PB1_HUMAN, sp|Q86U86-6|PB1_HUMAN, sp|Q86U86-7|PB1_HUMAN, sp|Q86U86-8|PB1_HUMAN, sp|Q86U86-9|PB1_HUMAN, sp|Q86U86|PB1_HUMAN	3	1.3293869E7	MS/MS	STY:79.9663@AT(0.4445)S(0.4445)PS(0.0156)S(0.0156)S(0.0156)VS(0.0074)GDFDDGHHS(0.0074)VS(0.0082)T(0.0228)PGPS(0.0182)R;
ATSSSNPSSPAPDWYK	AT[79.9663]SSSNPSSPAPDWY[79.9663]K	K	D	1950	1965	16	2	15Y(79.9663),2T(79.9663)	sp|P46100-4|ATRX_HUMAN	P46100-4	ATRX_HUMAN	ATRX	Isoform 3 of Transcriptional regulator ATRX		sp|P46100-2|ATRX_HUMAN, sp|P46100-3|ATRX_HUMAN, sp|P46100-5|ATRX_HUMAN, sp|P46100|ATRX_HUMAN	1	0	MS/MS	STY:79.9663@AT(0.3749)S(0.3749)S(0.3749)S(0.3749)NPS(0.0211)S(0.0211)PAPDWY(0.4580)K;
ATSSTQSLAR	AT[79.9663]SSTQSLAR	R	L	1836	1845	10	2	2T(79.9663)	sp|Q14980-2|NUMA1_HUMAN	Q14980-2	NUMA1_HUMAN	NUMA1	Isoform 2 of Nuclear mitotic apparatus protein 1		sp|Q14980-5|NUMA1_HUMAN, sp|Q14980|NUMA1_HUMAN	1	0	MS/MS	STY:79.9663@AT(0.2000)S(0.2000)S(0.2000)T(0.2000)QS(0.2000)LAR;
ATSPSSSVSGDFDDGHHSVSTPGPSR	AT[79.9663]S[79.9663]PSSSVSGDFDDGHHSVSTPGPSR	R	K	8	33	26	3	2T(79.9663),3S(79.9663)	sp|Q86U86-2|PB1_HUMAN	Q86U86-2	PB1_HUMAN	PBRM1	Isoform 2 of Protein polybromo-1		sp|Q86U86-3|PB1_HUMAN, sp|Q86U86-4|PB1_HUMAN, sp|Q86U86-5|PB1_HUMAN, sp|Q86U86-6|PB1_HUMAN, sp|Q86U86-7|PB1_HUMAN, sp|Q86U86-8|PB1_HUMAN, sp|Q86U86-9|PB1_HUMAN, sp|Q86U86|PB1_HUMAN	1	3194152	MS/MS	STY:79.9663@AT(0.3165)S(0.3165)PS(0.3165)S(0.3165)S(0.3165)VS(0.3165)GDFDDGHHS(0.0392)VS(0.0392)T(0.0138)PGPS(0.0085)R;
ATSSSNPSSPAPDWYK	AT[79.9663]S[79.9663]SSNPSSPAPDWYK	K	D	1950	1965	16	2	2T(79.9663),3S(79.9663)	sp|P46100-4|ATRX_HUMAN	P46100-4	ATRX_HUMAN	ATRX	Isoform 3 of Transcriptional regulator ATRX		sp|P46100-2|ATRX_HUMAN, sp|P46100-3|ATRX_HUMAN, sp|P46100-5|ATRX_HUMAN, sp|P46100|ATRX_HUMAN	3	1.4371796E7	MS/MS	STY:79.9663@AT(0.7901)S(0.7901)S(0.1258)S(0.1258)NPS(0.0721)S(0.0721)PAPDWY(0.0241)K;
ATVTPSPVK	AT[79.9663]VTPSPVK	K	G	176	184	9	2	2T(79.9663)	sp|Q9H1E3|NUCKS_HUMAN	Q9H1E3	NUCKS_HUMAN	NUCKS1	Nuclear ubiquitous casein and cyclin-dependent kinase substrate 1		sp|Q9H1E3-2|NUCKS_HUMAN	2	2.831117E7	MS/MS	STY:79.9663@AT(0.3333)VT(0.3333)PS(0.3333)PVK;
ATVTPSPVK	AT[79.9663]VTPS[79.9663]PVK	K	G	176	184	9	2	2T(79.9663),6S(79.9663)	sp|Q9H1E3|NUCKS_HUMAN	Q9H1E3	NUCKS_HUMAN	NUCKS1	Nuclear ubiquitous casein and cyclin-dependent kinase substrate 1		sp|Q9H1E3-2|NUCKS_HUMAN	2	3.0402956E7	MS/MS	STY:79.9663@AT(0.6570)VT(0.6570)PS(0.6861)PVK;
ATVTPSPVK	AT[79.9663]VT[79.9663]PSPVK	K	G	176	184	9	2	2T(79.9663),4T(79.9663)	sp|Q9H1E3|NUCKS_HUMAN	Q9H1E3	NUCKS_HUMAN	NUCKS1	Nuclear ubiquitous casein and cyclin-dependent kinase substrate 1		sp|Q9H1E3-2|NUCKS_HUMAN	2	3.0402956E7	MS/MS	STY:79.9663@AT(0.6667)VT(0.6667)PS(0.6667)PVK;
AVEYLLTGIPGSPEPEHGSVQESQVSEQPATEAGENPLEFLR	AVEYLLTGIPGSPEPEHGSVQESQVS[79.9663]EQPATEAGENPLEFLR	R	D	194	235	42	4	26S(79.9663)	sp|P54725-3|RD23A_HUMAN	P54725-3	RD23A_HUMAN	RAD23A	Isoform 3 of UV excision repair protein RAD23 homolog A			1	3.6079528E7	MS/MS	STY:79.9663@AVEY(0.0468)LLT(0.0431)GIPGS(0.0354)PEPEHGS(0.0410)VQES(0.0454)QVS(0.7792)EQPAT(0.0091)EAGENPLEFLR;
AVEYLLTGIPGSPEPEHGSVQESQVSEQPATEAGENPLEFLR	AVEYLLTGIPGSPEPEHGS[79.9663]VQESQVSEQPATEAGENPLEFLR	R	D	194	235	42	4	19S(79.9663)	sp|P54725-3|RD23A_HUMAN	P54725-3	RD23A_HUMAN	RAD23A	Isoform 3 of UV excision repair protein RAD23 homolog A			1	3.6079528E7	MS/MS	STY:79.9663@AVEY(0.0652)LLT(0.0110)GIPGS(0.0155)PEPEHGS(0.2908)VQES(0.2793)QVS(0.2793)EQPAT(0.0590)EAGENPLEFLR;
AVPMAPAPASPGSSNDSSAR	AVPMAPAPAS[79.9663]PGSSNDSSAR	K	S	724	743	20	2	10S(79.9663)	sp|Q66K74-2|MAP1S_HUMAN	Q66K74-2	MAP1S_HUMAN	MAP1S	Isoform 2 of Microtubule-associated protein 1S		sp|Q66K74|MAP1S_HUMAN	1	0	MS/MS	STY:79.9663@AVPMAPAPAS(0.4823)PGS(0.4823)S(0.0118)NDS(0.0118)S(0.0118)AR;
AVRPEVNTVASSDEVCDGDREK	AVRPEVNT[79.9663]VASSDEVC[57.0215]DGDREK	K	E	448	469	22	3	16C(57.0215),8T(79.9663)	sp|O75151|PHF2_HUMAN	O75151	PHF2_HUMAN	PHF2	Lysine-specific demethylase PHF2			1	1.11465e+06	MS/MS	STY:79.9663@AVRPEVNT(0.4235)VAS(0.4235)S(0.1529)DEVCDGDREK;
AVSEGCASEDEVEGEA	AVSEGC[57.0215]AS[79.9663]EDEVEGEA	R	-	902	917	16	2	6C(57.0215),8S(79.9663)	sp|Q9BYX2-2|TBD2A_HUMAN	Q9BYX2-2	TBD2A_HUMAN	TBC1D2	Isoform 2 of TBC1 domain family member 2A		sp|Q9BYX2-4|TBD2A_HUMAN, sp|Q9BYX2-5|TBD2A_HUMAN, sp|Q9BYX2-6|TBD2A_HUMAN, sp|Q9BYX2|TBD2A_HUMAN	1	0	MS/MS	STY:79.9663@AVS(0.4386)EGCAS(0.5614)EDEVEGEA;
AVSPPHLDGPPSPRSPVIGSEVFLPNSNHVASGAGEAEER	AVSPPHLDGPPSPRS[79.9663]PVIGS[79.9663]EVFLPNSNHVASGAGEAEER	K	V	468	507	40	4	15S(79.9663),20S(79.9663)	sp|P29590-11|PML_HUMAN	P29590-11	PML_HUMAN	PML	Isoform PML-11 of Protein PML		sp|P29590-12|PML_HUMAN, sp|P29590-13|PML_HUMAN, sp|P29590-2|PML_HUMAN, sp|P29590-3|PML_HUMAN, sp|P29590-5|PML_HUMAN, sp|P29590-8|PML_HUMAN, sp|P29590-9|PML_HUMAN, sp|P29590|PML_HUMAN	1	7369208	MS/MS	STY:79.9663@AVS(0.0435)PPHLDGPPS(0.0656)PRS(0.8747)PVIGS(0.8771)EVFLPNS(0.0509)NHVAS(0.0882)GAGEAEER;
AVSPPHLDGPPSPRSPVIGSEVFLPNSNHVASGAGEAEER	AVSPPHLDGPPSPRS[79.9663]PVIGS[79.9663]EVFLPNS[79.9663]NHVASGAGEAEER	K	V	468	507	40	4	15S(79.9663),20S(79.9663),27S(79.9663)	sp|P29590-11|PML_HUMAN	P29590-11	PML_HUMAN	PML	Isoform PML-11 of Protein PML		sp|P29590-12|PML_HUMAN, sp|P29590-13|PML_HUMAN, sp|P29590-2|PML_HUMAN, sp|P29590-3|PML_HUMAN, sp|P29590-5|PML_HUMAN, sp|P29590-8|PML_HUMAN, sp|P29590-9|PML_HUMAN, sp|P29590|PML_HUMAN	1	6.5511212E7	MS/MS	STY:79.9663@AVS(0.5414)PPHLDGPPS(0.5702)PRS(0.5897)PVIGS(0.5897)EVFLPNS(0.6281)NHVAS(0.0810)GAGEAEER;
AVSPPHLDGPPSPRSPVIGSEVFLPNSNHVASGAGEAEER	AVS[79.9663]PPHLDGPPSPRSPVIGS[79.9663]EVFLPNS[79.9663]NHVASGAGEAEER	K	V	468	507	40	4	20S(79.9663),27S(79.9663),3S(79.9663)	sp|P29590-11|PML_HUMAN	P29590-11	PML_HUMAN	PML	Isoform PML-11 of Protein PML		sp|P29590-12|PML_HUMAN, sp|P29590-13|PML_HUMAN, sp|P29590-2|PML_HUMAN, sp|P29590-3|PML_HUMAN, sp|P29590-5|PML_HUMAN, sp|P29590-8|PML_HUMAN, sp|P29590-9|PML_HUMAN, sp|P29590|PML_HUMAN	1	0	MS/MS	STY:79.9663@AVS(0.7305)PPHLDGPPS(0.1011)PRS(0.1011)PVIGS(0.7304)EVFLPNS(0.7256)NHVAS(0.6114)GAGEAEER;
AVSPPHLDGPPSPRSPVIGSEVFLPNSNHVASGAGEAEER	AVS[79.9663]PPHLDGPPS[79.9663]PRSPVIGS[79.9663]EVFLPNSNHVASGAGEAEER	K	V	468	507	40	4	12S(79.9663),20S(79.9663),3S(79.9663)	sp|P29590-11|PML_HUMAN	P29590-11	PML_HUMAN	PML	Isoform PML-11 of Protein PML		sp|P29590-12|PML_HUMAN, sp|P29590-13|PML_HUMAN, sp|P29590-2|PML_HUMAN, sp|P29590-3|PML_HUMAN, sp|P29590-5|PML_HUMAN, sp|P29590-8|PML_HUMAN, sp|P29590-9|PML_HUMAN, sp|P29590|PML_HUMAN	1	6.5511212E7	MS/MS	STY:79.9663@AVS(0.5532)PPHLDGPPS(0.5085)PRS(0.5085)PVIGS(0.5325)EVFLPNS(0.4562)NHVAS(0.4412)GAGEAEER;
AVSPPHLDGPPSPRSPVIGSEVFLPNSNHVASGAGEAGR	AVS[79.9663]PPHLDGPPS[79.9663]PRSPVIGS[79.9663]EVFLPNSNHVASGAGEAGR	K	E	516	554	39	4	12S(79.9663),20S(79.9663),3S(79.9663)	sp|P29590-4|PML_HUMAN	P29590-4	PML_HUMAN	PML	Isoform PML-6 of Protein PML			1	6465426	MS/MS	STY:79.9663@AVS(0.5296)PPHLDGPPS(0.4885)PRS(0.4885)PVIGS(0.5317)EVFLPNS(0.4808)NHVAS(0.4808)GAGEAGR;
AVTIANSPSKPSEK	AVT[79.9663]IANSPSKPSEK	K	D	197	210	14	2	3T(79.9663)	sp|Q8NEF9|SRFB1_HUMAN	Q8NEF9	SRFB1_HUMAN	SRFBP1	Serum response factor-binding protein 1			1	0	MS/MS	STY:79.9663@AVT(0.7453)IANS(0.0849)PS(0.0849)KPS(0.0849)EK;
AYLGYQAVPSGSSGSLSTSSSSSPPGTPSPADAK	AYLGYQAVPSGSSGSLSTSSSS[79.9663]SPPGTPSPADAK	R	A	186	219	34	3	22S(79.9663)	sp|P17676-2|CEBPB_HUMAN	P17676-2	CEBPB_HUMAN	CEBPB	Isoform 2 of CCAAT/enhancer-binding protein beta		sp|P17676-3|CEBPB_HUMAN, sp|P17676|CEBPB_HUMAN	1	1.3644914E7	MS/MS	STY:79.9663@AY(0.0251)LGY(0.0251)QAVPS(0.0251)GS(0.0665)S(0.0665)GS(0.0665)LS(0.0665)T(0.0110)S(0.0044)S(0.0044)S(0.0044)S(0.3134)S(0.3134)PPGT(0.0038)PS(0.0038)PADAK;
AYLGYQAVPSGSSGSLSTSSSSSPPGTPSPADAK	AYLGYQAVPS[79.9663]GSSGSLSTSSSSSPPGTPSPADAK	R	A	186	219	34	3	10S(79.9663)	sp|P17676-2|CEBPB_HUMAN	P17676-2	CEBPB_HUMAN	CEBPB	Isoform 2 of CCAAT/enhancer-binding protein beta		sp|P17676-3|CEBPB_HUMAN, sp|P17676|CEBPB_HUMAN	1	1.3644914E7	MS/MS	STY:79.9663@AY(0.0022)LGY(0.0017)QAVPS(0.1437)GS(0.1437)S(0.1437)GS(0.1437)LS(0.0092)T(0.0028)S(0.0463)S(0.0463)S(0.0463)S(0.0463)S(0.0463)PPGT(0.1218)PS(0.0560)PADAK;
AYSQEEITQGFEETGDTLYAPYSTHFQLQNQPPQK	AYSQEEITQGFEETGDTLY[79.9663]APYSTHFQLQNQPPQK	R	E	299	333	35	3	19Y(79.9663)	sp|Q8NFJ5|RAI3_HUMAN	Q8NFJ5	RAI3_HUMAN	GPRC5A	Retinoic acid-induced protein 3			1	0	MS/MS	STY:79.9663@AY(0.0267)S(0.0267)QEEIT(0.0267)QGFEET(0.0267)GDT(0.0267)LY(0.5957)APY(0.0220)S(0.0871)T(0.1619)HFQLQNQPPQK;
AYSPEYR	AYS[79.9663]PEYR	R	R	241	247	7	2	3S(79.9663)	sp|Q9UDY2-3|ZO2_HUMAN	Q9UDY2-3	ZO2_HUMAN	TJP2	Isoform C1 of Tight junction protein ZO-2		sp|Q9UDY2-2|ZO2_HUMAN, sp|Q9UDY2-4|ZO2_HUMAN, sp|Q9UDY2-5|ZO2_HUMAN, sp|Q9UDY2-6|ZO2_HUMAN, sp|Q9UDY2-7|ZO2_HUMAN, sp|Q9UDY2|ZO2_HUMAN	1	2.25122e+06	MS/MS	STY:79.9663@AY(0.0212)S(0.4894)PEY(0.4894)R;
AYLGYQAVPSGSSGSLSTSSSSSPPGTPSPADAK	AY[79.9663]LGYQAVPSGSSGSLSTSSSSSPPGTPSPADAK	R	A	186	219	34	3	2Y(79.9663)	sp|P17676-2|CEBPB_HUMAN	P17676-2	CEBPB_HUMAN	CEBPB	Isoform 2 of CCAAT/enhancer-binding protein beta		sp|P17676-3|CEBPB_HUMAN, sp|P17676|CEBPB_HUMAN	1	0	MS/MS	STY:79.9663@AY(0.0674)LGY(0.0674)QAVPS(0.0674)GS(0.0665)S(0.0665)GS(0.0665)LS(0.0665)T(0.0665)S(0.0665)S(0.0665)S(0.0665)S(0.0665)S(0.0665)PPGT(0.0665)PS(0.0665)PADAK;
CAAPRPPSSSPEQR	C[57.0215]AAPRPPS[79.9663]SSPEQR	K	T	838	851	14	2	1C(57.0215),8S(79.9663)	sp|Q5H9R7-2|PP6R3_HUMAN	Q5H9R7-2	PP6R3_HUMAN	PPP6R3	Isoform 2 of Serine/threonine-protein phosphatase 6 regulatory subunit 3		sp|Q5H9R7-4|PP6R3_HUMAN, sp|Q5H9R7-5|PP6R3_HUMAN, sp|Q5H9R7-6|PP6R3_HUMAN, sp|Q5H9R7|PP6R3_HUMAN	1	996683	MS/MS	STY:79.9663@CAAPRPPS(0.3333)S(0.3333)S(0.3333)PEQR;
CAPSAGSPAAAVGRESPGAAATSSSGPQAQQHR	C[57.0215]APSAGSPAAAVGRESPGAAAT[79.9663]S[79.9663]SSGPQAQQHR	R	G	54	86	33	4	1C(57.0215),22T(79.9663),23S(79.9663)	sp|Q7L2J0|MEPCE_HUMAN	Q7L2J0	MEPCE_HUMAN	MEPCE	7SK snRNA methylphosphate capping enzyme			1	3.41332e+06	MS/MS	STY:79.9663@CAPS(0.1170)AGS(0.1170)PAAAVGRES(0.0525)PGAAAT(0.4963)S(0.4963)S(0.3604)S(0.3604)GPQAQQHR;
CAPSAGSPAAAVGRESPGAAATSSSGPQAQQHR	C[57.0215]APSAGS[79.9663]PAAAVGRES[79.9663]PGAAATSSSGPQAQQHR	R	G	54	86	33	3	16S(79.9663),1C(57.0215),7S(79.9663)	sp|Q7L2J0|MEPCE_HUMAN	Q7L2J0	MEPCE_HUMAN	MEPCE	7SK snRNA methylphosphate capping enzyme			1	6695834	MS/MS	STY:79.9663@CAPS(0.1158)AGS(0.8736)PAAAVGRES(0.8824)PGAAAT(0.0477)S(0.0268)S(0.0268)S(0.0268)GPQAQQHR;
CAPSAGSPAAAVGRESPGAAATSSSGPQAQQHR	C[57.0215]APS[79.9663]AGS[79.9663]PAAAVGRESPGAAATSSSGPQAQQHR	R	G	54	86	33	3	1C(57.0215),4S(79.9663),7S(79.9663)	sp|Q7L2J0|MEPCE_HUMAN	Q7L2J0	MEPCE_HUMAN	MEPCE	7SK snRNA methylphosphate capping enzyme			1	7945393	MS/MS	STY:79.9663@CAPS(0.4732)AGS(0.4732)PAAAVGRES(0.2515)PGAAAT(0.2515)S(0.2515)S(0.2515)S(0.0479)GPQAQQHR;
CDDSPRTPSNTPSAEADWSPGLELHPDYK	C[57.0215]DDSPRT[79.9663]PSNTPSAEADWSPGLELHPDY[79.9663]K	R	T	15	43	29	3	1C(57.0215),28Y(79.9663),7T(79.9663)	sp|Q9Y3Z3-3|SAMH1_HUMAN	Q9Y3Z3-3	SAMH1_HUMAN	SAMHD1	Isoform 3 of Deoxynucleoside triphosphate triphosphohydrolase SAMHD1		sp|Q9Y3Z3-4|SAMH1_HUMAN, sp|Q9Y3Z3|SAMH1_HUMAN	1	0	MS/MS	STY:79.9663@CDDS(0.0163)PRT(0.3737)PS(0.3737)NT(0.3737)PS(0.3737)AEADWS(0.0342)PGLELHPDY(0.4545)K;
CDGDASPPSPAR	C[57.0215]DGDAS[79.9663]PPS[79.9663]PAR	R	W	15	26	12	2	1C(57.0215),6S(79.9663),9S(79.9663)	sp|Q14493|SLBP_HUMAN	Q14493	SLBP_HUMAN	SLBP	Histone RNA hairpin-binding protein			2	3664273	MS/MS	STY:79.9663@CDGDAS(1.0000)PPS(1.0000)PAR;
CDILVQEELLASPK	C[57.0215]DILVQEELLAS[79.9663]PK	K	K	592	605	14	2	12S(79.9663),1C(57.0215)	sp|Q96JM3|CHAP1_HUMAN	Q96JM3	CHAP1_HUMAN	CHAMP1	Chromosome alignment-maintaining phosphoprotein 1			1	0	MS/MS	STY:79.9663@CDILVQEELLAS(1.0000)PK;
CDSSPDSAEDVRK	C[57.0215]DSSPDS[79.9663]AEDVRK	K	V	132	144	13	2,3	1C(57.0215),7S(79.9663)	sp|P02765|FETUA_HUMAN	P02765	FETUA_HUMAN	AHSG	Alpha-2-HS-glycoprotein			4	1.7051618E7	MS/MS	STY:79.9663@CDS(0.0371)S(0.0371)PDS(0.9258)AEDVRK;
CDSSPDSAEDVRK	C[57.0215]DS[79.9663]SPDSAEDVRK	K	V	132	144	13	2	1C(57.0215),3S(79.9663)	sp|P02765|FETUA_HUMAN	P02765	FETUA_HUMAN	AHSG	Alpha-2-HS-glycoprotein			1	6645286	MS/MS	STY:79.9663@CDS(0.3333)S(0.3333)PDS(0.3333)AEDVRK;
CEERSPSFGEDYYGPSR	C[57.0215]EERS[79.9663]PS[79.9663]FGEDYYGPSR	R	S	72	88	17	2	1C(57.0215),5S(79.9663),7S(79.9663)	sp|P49761-1|CLK3_HUMAN	P49761-1	CLK3_HUMAN	CLK3	Isoform 1 of Dual specificity protein kinase CLK3		sp|P49761-2|CLK3_HUMAN, sp|P49761-3|CLK3_HUMAN, sp|P49761|CLK3_HUMAN	1	0	MS/MS	STY:79.9663@CEERS(0.7755)PS(0.7755)FGEDY(0.1497)Y(0.1497)GPS(0.1497)R;
CGSGPVHISGQHLVAVEEDAESEDEEEEDVK	C[57.0215]GSGPVHISGQHLVAVEEDAES[79.9663]EDEEEEDVK	K	L	104	134	31	3,4	1C(57.0215),22S(79.9663)	sp|P06748-2|NPM_HUMAN	P06748-2	NPM_HUMAN	NPM1	Isoform 2 of Nucleophosmin		sp|P06748-3|NPM_HUMAN, sp|P06748|NPM_HUMAN	56	3.44179661E9	MS/MS	STY:79.9663@CGS(0.0309)GPVHIS(0.0314)GQHLVAVEEDAES(0.9377)EDEEEEDVK;
CGSGPVHISGQHLVAVEEDAESEDEEEEDVK	C[57.0215]GSGPVHIS[79.9663]GQHLVAVEEDAESEDEEEEDVK	K	L	104	134	31	3	1C(57.0215),9S(79.9663)	sp|P06748-2|NPM_HUMAN	P06748-2	NPM_HUMAN	NPM1	Isoform 2 of Nucleophosmin		sp|P06748-3|NPM_HUMAN, sp|P06748|NPM_HUMAN	5	3.27295795E9	MS/MS	STY:79.9663@CGS(0.2155)GPVHIS(0.7138)GQHLVAVEEDAES(0.0707)EDEEEEDVK;
CGSGPVHISGQHLVAVEEDAESEDEEEEDVK	C[57.0215]GS[79.9663]GPVHISGQHLVAVEEDAESEDEEEEDVK	K	L	104	134	31	3,4	1C(57.0215),3S(79.9663)	sp|P06748-2|NPM_HUMAN	P06748-2	NPM_HUMAN	NPM1	Isoform 2 of Nucleophosmin		sp|P06748-3|NPM_HUMAN, sp|P06748|NPM_HUMAN	9	0	MS/MS	STY:79.9663@CGS(0.7972)GPVHIS(0.0909)GQHLVAVEEDAES(0.1119)EDEEEEDVK;
CPFPAGAALACCSEDEEDDEEHEGGGSR	C[57.0215]PFPAGAALAC[57.0215]C[57.0215]S[79.9663]EDEEDDEEHEGGGSR	R	S	27	54	28	3	11C(57.0215),12C(57.0215),13S(79.9663),1C(57.0215)	sp|Q147X3|NAA30_HUMAN	Q147X3	NAA30_HUMAN	NAA30	N-alpha-acetyltransferase 30			5	3.20095e+06	MS/MS	STY:79.9663@CPFPAGAALACCS(0.9149)EDEEDDEEHEGGGS(0.0851)R;
CPFPAGAALACCSEDEEDDEEHEGGGSRSPAGGESATVAAK	C[57.0215]PFPAGAALAC[57.0215]C[57.0215]S[79.9663]EDEEDDEEHEGGGS[79.9663]RSPAGGESATVAAK	R	G	27	67	41	4	11C(57.0215),12C(57.0215),13S(79.9663),1C(57.0215),27S(79.9663)	sp|Q147X3|NAA30_HUMAN	Q147X3	NAA30_HUMAN	NAA30	N-alpha-acetyltransferase 30			1	0	MS/MS	STY:79.9663@CPFPAGAALACCS(0.4000)EDEEDDEEHEGGGS(0.4000)RS(0.4000)PAGGES(0.4000)AT(0.4000)VAAK;
CPSPINEHNGLIK	C[57.0215]PS[79.9663]PINEHNGLIK	K	G	155	167	13	2	1C(57.0215),3S(79.9663)	sp|Q9Y2H6-2|FND3A_HUMAN	Q9Y2H6-2	FND3A_HUMAN	FNDC3A	Isoform 2 of Fibronectin type-III domain-containing protein 3A		sp|Q9Y2H6|FND3A_HUMAN	1	6735924	MS/MS	STY:79.9663@CPS(1.0000)PINEHNGLIK;
CPSPTMSLPSSWK	C[57.0215]PS[79.9663]PTMSLPSSWK	R	Y	508	520	13	2	1C(57.0215),3S(79.9663)	sp|Q8N3V7-2|SYNPO_HUMAN	Q8N3V7-2	SYNPO_HUMAN	SYNPO	Isoform 2 of Synaptopodin		sp|Q8N3V7-3|SYNPO_HUMAN, sp|Q8N3V7|SYNPO_HUMAN	1	0	MS/MS	STY:79.9663@CPS(0.9016)PT(0.0331)MS(0.0331)LPS(0.0161)S(0.0161)WK;
CPTEVLLTPPTPLPPPSPPPTASDR	C[57.0215]PTEVLLT[79.9663]PPTPLPPPSPPPTASDR	K	G	62	86	25	3	1C(57.0215),8T(79.9663)	sp|Q6ZMT1|STAC2_HUMAN	Q6ZMT1	STAC2_HUMAN	STAC2	SH3 and cysteine-rich domain-containing protein 2			1	0	MS/MS	STY:79.9663@CPT(0.0102)EVLLT(0.3136)PPT(0.3136)PLPPPS(0.0094)PPPT(0.1766)AS(0.1766)DR;
CQTAEADSESDHEVPEPESEMK	C[57.0215]QTAEADSES[79.9663]DHEVPEPES[79.9663]EMK	R	M	966	987	22	3	10S(79.9663),19S(79.9663),1C(57.0215)	sp|Q9BPX3|CND3_HUMAN	Q9BPX3	CND3_HUMAN	NCAPG	Condensin complex subunit 3			1	0	MS/MS	STY:79.9663@CQT(0.1624)AEADS(0.1624)ES(0.8376)DHEVPEPES(0.8376)EMK;
CQTAEADSESDHEVPEPESEMK	C[57.0215]QTAEADS[79.9663]ESDHEVPEPES[79.9663]EM[15.9949]K	R	M	966	987	22	3	19S(79.9663),1C(57.0215),21M(15.9949),8S(79.9663)	sp|Q9BPX3|CND3_HUMAN	Q9BPX3	CND3_HUMAN	NCAPG	Condensin complex subunit 3			1	9706481	MS/MS	STY:79.9663@CQT(0.0746)AEADS(0.6244)ES(0.6244)DHEVPEPES(0.6766)EMK;M:15.9949@CQTAEADSESDHEVPEPESEM(1.0000)K;
CQTAEADSESDHEVPEPESEMK	C[57.0215]QTAEADS[79.9663]ES[79.9663]DHEVPEPESEMK	R	M	966	987	22	3	10S(79.9663),1C(57.0215),8S(79.9663)	sp|Q9BPX3|CND3_HUMAN	Q9BPX3	CND3_HUMAN	NCAPG	Condensin complex subunit 3			2	2.8760592E7	MS/MS	STY:79.9663@CQT(0.1855)AEADS(0.8681)ES(0.8699)DHEVPEPES(0.0766)EMK;
CQTAEADSESDHEVPEPESEMK	C[57.0215]QT[79.9663]AEADSESDHEVPEPESEMK	R	M	966	987	22	3	1C(57.0215),3T(79.9663)	sp|Q9BPX3|CND3_HUMAN	Q9BPX3	CND3_HUMAN	NCAPG	Condensin complex subunit 3			2	4408671	MS/MS	STY:79.9663@CQT(0.7239)AEADS(0.0443)ES(0.0443)DHEVPEPES(0.1874)EMK;
CQTAEADSESDHEVPEPESEMK	C[57.0215]QT[79.9663]AEADSESDHEVPEPESEM[15.9949]K	R	M	966	987	22	3	1C(57.0215),21M(15.9949),3T(79.9663)	sp|Q9BPX3|CND3_HUMAN	Q9BPX3	CND3_HUMAN	NCAPG	Condensin complex subunit 3			1	1.44403e+06	MS/MS	STY:79.9663@CQT(0.3189)AEADS(0.3189)ES(0.3189)DHEVPEPES(0.0434)EMK;M:15.9949@CQTAEADSESDHEVPEPESEM(1.0000)K;
CQTAEADSESDHEVPEPESEMK	C[57.0215]QT[79.9663]AEADS[79.9663]ESDHEVPEPESEMK	R	M	966	987	22	3	1C(57.0215),3T(79.9663),8S(79.9663)	sp|Q9BPX3|CND3_HUMAN	Q9BPX3	CND3_HUMAN	NCAPG	Condensin complex subunit 3			5	2.8760592E7	MS/MS	STY:79.9663@CQT(0.8116)AEADS(0.8116)ES(0.3100)DHEVPEPES(0.0668)EMK;
CQTAEADSESDHEVPEPESEMK	C[57.0215]QT[79.9663]AEADS[79.9663]ESDHEVPEPESEM[15.9949]K	R	M	966	987	22	3	1C(57.0215),21M(15.9949),3T(79.9663),8S(79.9663)	sp|Q9BPX3|CND3_HUMAN	Q9BPX3	CND3_HUMAN	NCAPG	Condensin complex subunit 3			4	9706481	MS/MS	STY:79.9663@CQT(0.8702)AEADS(0.8682)ES(0.2028)DHEVPEPES(0.0587)EMK;M:15.9949@CQTAEADSESDHEVPEPESEM(1.0000)K;
CRSPGMLEPLGSSR	C[57.0215]RS[79.9663]PGMLEPLGSSR	R	T	2130	2143	14	2	1C(57.0215),3S(79.9663)	sp|Q9UQ35|SRRM2_HUMAN	Q9UQ35	SRRM2_HUMAN	SRRM2	Serine/arginine repetitive matrix protein 2			1	1.2647998E7	MS/MS	STY:79.9663@CRS(0.9001)PGMLEPLGS(0.0499)S(0.0499)R;
CRSPGMLEPLGSSR	C[57.0215]RS[79.9663]PGM[15.9949]LEPLGSSR	R	T	2130	2143	14	2	1C(57.0215),3S(79.9663),6M(15.9949)	sp|Q9UQ35|SRRM2_HUMAN	Q9UQ35	SRRM2_HUMAN	SRRM2	Serine/arginine repetitive matrix protein 2			1	0	MS/MS	STY:79.9663@CRS(0.7963)PGMLEPLGS(0.1272)S(0.0764)R;M:15.9949@CRSPGM(1.0000)LEPLGSSR;
CSDVSELSSSPPGPYHQEPYVCKPEER	C[57.0215]SDVSELSSSPPGPY[79.9663]HQEPYVC[57.0215]KPEER	K	F	173	199	27	4	15Y(79.9663),1C(57.0215),22C(57.0215)	sp|Q9Y478|AAKB1_HUMAN	Q9Y478	AAKB1_HUMAN	PRKAB1	5'-AMP-activated protein kinase subunit beta-1			1	0	MS/MS	STY:79.9663@CS(0.0205)DVS(0.0278)ELS(0.0107)S(0.0107)S(0.0107)PPGPY(0.4598)HQEPY(0.4598)VCKPEER;
CSDVSELSSSPPGPYHQEPYVCKPEER	C[57.0215]SDVSELS[79.9663]SSPPGPYHQEPYVC[57.0215]KPEER	K	F	173	199	27	3	1C(57.0215),22C(57.0215),8S(79.9663)	sp|Q9Y478|AAKB1_HUMAN	Q9Y478	AAKB1_HUMAN	PRKAB1	5'-AMP-activated protein kinase subunit beta-1			1	0	MS/MS	STY:79.9663@CS(0.0497)DVS(0.0497)ELS(0.2220)S(0.2220)S(0.2220)PPGPY(0.2220)HQEPY(0.0124)VCKPEER;
CSGPGLSPGMVR	C[57.0215]SGPGLS[79.9663]PGMVR	K	A	1453	1464	12	2	1C(57.0215),7S(79.9663)	sp|P21333-2|FLNA_HUMAN	P21333-2	FLNA_HUMAN	FLNA	Isoform 2 of Filamin-A		sp|P21333|FLNA_HUMAN	2	5.0197464E7	MS/MS	STY:79.9663@CS(0.0587)GPGLS(0.9413)PGMVR;
CSGPGLSPGMVR	C[57.0215]SGPGLS[79.9663]PGM[15.9949]VR	K	A	1453	1464	12	2	10M(15.9949),1C(57.0215),7S(79.9663)	sp|P21333-2|FLNA_HUMAN	P21333-2	FLNA_HUMAN	FLNA	Isoform 2 of Filamin-A		sp|P21333|FLNA_HUMAN	1	0	MS/MS	STY:79.9663@CS(0.0666)GPGLS(0.9334)PGMVR;M:15.9949@CSGPGLSPGM(1.0000)VR;
CSVSLSNVEAR	C[57.0215]SVS[79.9663]LSNVEAR	R	R	726	736	11	2	1C(57.0215),4S(79.9663)	sp|P47712|PA24A_HUMAN	P47712	PA24A_HUMAN	PLA2G4A	Cytosolic phospholipase A2			2	3.4433736E7	MS/MS	STY:79.9663@CS(0.0639)VS(0.9011)LS(0.0350)NVEAR;
CSDVSELSSSPPGPYHQEPYVCKPEER	C[57.0215]S[79.9663]DVSELSSSPPGPYHQEPYVC[57.0215]KPEER	K	F	173	199	27	3	1C(57.0215),22C(57.0215),2S(79.9663)	sp|Q9Y478|AAKB1_HUMAN	Q9Y478	AAKB1_HUMAN	PRKAB1	5'-AMP-activated protein kinase subunit beta-1			1	1.0608202E7	MS/MS	STY:79.9663@CS(0.1949)DVS(0.1949)ELS(0.1949)S(0.1949)S(0.1949)PPGPY(0.0128)HQEPY(0.0128)VCKPEER;
CSGPGLSPGMVR	C[57.0215]S[79.9663]GPGLSPGMVR	K	A	1453	1464	12	2	1C(57.0215),2S(79.9663)	sp|P21333-2|FLNA_HUMAN	P21333-2	FLNA_HUMAN	FLNA	Isoform 2 of Filamin-A		sp|P21333|FLNA_HUMAN	1	5.0197464E7	MS/MS	STY:79.9663@CS(0.9367)GPGLS(0.0633)PGMVR;
CSGPGLSPGMVR	C[57.0215]S[79.9663]GPGLSPGM[15.9949]VR	K	A	1453	1464	12	2	10M(15.9949),1C(57.0215),2S(79.9663)	sp|P21333-2|FLNA_HUMAN	P21333-2	FLNA_HUMAN	FLNA	Isoform 2 of Filamin-A		sp|P21333|FLNA_HUMAN	2	0	MS/MS	STY:79.9663@CS(0.7848)GPGLS(0.2152)PGMVR;M:15.9949@CSGPGLSPGM(1.0000)VR;
CSSMSSLSR	C[57.0215]S[79.9663]SMSSLSR	R	E	2268	2276	9	2	1C(57.0215),2S(79.9663)	sp|O15027-4|SC16A_HUMAN	O15027-4	SC16A_HUMAN	SEC16A	Isoform 4 of Protein transport protein Sec16A		sp|O15027-5|SC16A_HUMAN, sp|O15027|SC16A_HUMAN	1	0	MS/MS	STY:79.9663@CS(0.3258)S(0.3258)MS(0.3258)S(0.0114)LS(0.0114)R;
CSVSLSNVEAR	C[57.0215]S[79.9663]VSLSNVEAR	R	R	726	736	11	2	1C(57.0215),2S(79.9663)	sp|P47712|PA24A_HUMAN	P47712	PA24A_HUMAN	PLA2G4A	Cytosolic phospholipase A2			1	3.4433736E7	MS/MS	STY:79.9663@CS(0.4842)VS(0.4842)LS(0.0315)NVEAR;
CTLPEHESPSQDISDACEAESTER	C[57.0215]T[79.9663]LPEHESPSQDISDAC[57.0215]EAESTER	R	C	702	725	24	3	17C(57.0215),1C(57.0215),2T(79.9663)	sp|Q32MZ4-2|LRRF1_HUMAN	Q32MZ4-2	LRRF1_HUMAN	LRRFIP1	Isoform 2 of Leucine-rich repeat flightless-interacting protein 1		sp|Q32MZ4-3|LRRF1_HUMAN, sp|Q32MZ4|LRRF1_HUMAN	1	4835332	MS/MS	STY:79.9663@CT(0.2695)LPEHES(0.2695)PS(0.2695)QDIS(0.0459)DACEAES(0.0728)T(0.0728)ER;
DAGGPRPESPVPAGR	DAGGPRPES[79.9663]PVPAGR	R	A	8	22	15	2	9S(79.9663)	sp|Q9BVG9|PTSS2_HUMAN	Q9BVG9	PTSS2_HUMAN	PTDSS2	Phosphatidylserine synthase 2			1	0	MS/MS	STY:79.9663@DAGGPRPES(1.0000)PVPAGR;
DAHDVSPTSTDTEAQLTVER	DAHDVSPT[79.9663]STDTEAQLTVER	R	Q	189	208	20	3	8T(79.9663)	sp|Q8IVF2-3|AHNK2_HUMAN	Q8IVF2-3	AHNK2_HUMAN	AHNAK2	Isoform 3 of Protein AHNAK2		sp|Q8IVF2|AHNK2_HUMAN	1	8959812	MS/MS	STY:79.9663@DAHDVS(0.0514)PT(0.1897)S(0.1897)T(0.1897)DT(0.1897)EAQLT(0.1897)VER;
DAHDVSPTSTDTEAQLTVER	DAHDVS[79.9663]PTSTDTEAQLTVER	R	Q	189	208	20	3	6S(79.9663)	sp|Q8IVF2-3|AHNK2_HUMAN	Q8IVF2-3	AHNK2_HUMAN	AHNAK2	Isoform 3 of Protein AHNAK2		sp|Q8IVF2|AHNK2_HUMAN	3	8986204	MS/MS	STY:79.9663@DAHDVS(0.3200)PT(0.3200)S(0.3200)T(0.0257)DT(0.0067)EAQLT(0.0075)VER;
DALGDSLQVPVSPSSTTSSR	DALGDSLQVPVS[79.9663]PSSTTSSR	R	C	372	391	20	2	12S(79.9663)	sp|Q9Y2D5-4|AKAP2_HUMAN	Q9Y2D5-4	AKAP2_HUMAN	AKAP2	Isoform 3 of A-kinase anchor protein 2		sp|Q9Y2D5-5|AKAP2_HUMAN, sp|Q9Y2D5-6|AKAP2_HUMAN, sp|Q9Y2D5-7|AKAP2_HUMAN, sp|Q9Y2D5|AKAP2_HUMAN	1	0	MS/MS	STY:79.9663@DALGDS(0.0072)LQVPVS(0.4748)PS(0.4748)S(0.0086)T(0.0086)T(0.0086)S(0.0086)S(0.0086)R;
DAPTSPASVASSSSTPSSK	DAPTSPASVASSSSTPSS[79.9663]K	K	T	282	300	19	2	18S(79.9663)	sp|Q04726-2|TLE3_HUMAN	Q04726-2	TLE3_HUMAN	TLE3	Isoform 2 of Transducin-like enhancer protein 3		sp|Q04726-3|TLE3_HUMAN, sp|Q04726-4|TLE3_HUMAN, sp|Q04726-5|TLE3_HUMAN, sp|Q04726-6|TLE3_HUMAN, sp|Q04726-7|TLE3_HUMAN, sp|Q04726|TLE3_HUMAN	1	0	MS/MS	STY:79.9663@DAPT(0.0251)S(0.0948)PAS(0.0948)VAS(0.0948)S(0.0948)S(0.0948)S(0.0948)T(0.0948)PS(0.0151)S(0.2966)K;
DAPTSPASVASSSSTPSSK	DAPT[79.9663]SPASVASSSSTPSSK	K	T	282	300	19	2	4T(79.9663)	sp|Q04726-2|TLE3_HUMAN	Q04726-2	TLE3_HUMAN	TLE3	Isoform 2 of Transducin-like enhancer protein 3		sp|Q04726-3|TLE3_HUMAN, sp|Q04726-4|TLE3_HUMAN, sp|Q04726-5|TLE3_HUMAN, sp|Q04726-6|TLE3_HUMAN, sp|Q04726-7|TLE3_HUMAN, sp|Q04726|TLE3_HUMAN	2	1.0712838E7	MS/MS	STY:79.9663@DAPT(0.4655)S(0.4655)PAS(0.0229)VAS(0.0066)S(0.0066)S(0.0066)S(0.0066)T(0.0066)PS(0.0066)S(0.0066)K;
DAQRLSPIPEEVPK	DAQRLS[79.9663]PIPEEVPK	K	S	568	581	14	2,3	6S(79.9663)	sp|Q96T23-2|RSF1_HUMAN	Q96T23-2	RSF1_HUMAN	RSF1	Isoform 2 of Remodeling and spacing factor 1		sp|Q96T23-3|RSF1_HUMAN, sp|Q96T23|RSF1_HUMAN	4	1.5048762E7	MS/MS	STY:79.9663@DAQRLS(1.0000)PIPEEVPK;
DASPINRWSPTR	DAS[79.9663]PINRWS[79.9663]PTR	K	R	429	440	12	2	3S(79.9663),9S(79.9663)	sp|Q13523|PRP4B_HUMAN	Q13523	PRP4B_HUMAN	PRPF4B	Serine/threonine-protein kinase PRP4 homolog			1	3.8618136E7	MS/MS	STY:79.9663@DAS(0.6862)PINRWS(0.6569)PT(0.6569)R;
DCDPGSPR	DC[57.0215]DPGS[79.9663]PR	K	R	906	913	8	2	2C(57.0215),6S(79.9663)	sp|Q00341-2|VIGLN_HUMAN	Q00341-2	VIGLN_HUMAN	HDLBP	Isoform 2 of Vigilin		sp|Q00341|VIGLN_HUMAN	1	1.50551e+06	MS/MS	STY:79.9663@DCDPGS(1.0000)PR;
DCNESTDNDELEDEPEEPFYR	DC[57.0215]NES[79.9663]TDNDELEDEPEEPFY[79.9663]R	K	Y	351	371	21	3	20Y(79.9663),2C(57.0215),5S(79.9663)	sp|Q9Y2K1-2|ZBTB1_HUMAN	Q9Y2K1-2	ZBTB1_HUMAN	ZBTB1	Isoform 2 of Zinc finger and BTB domain-containing protein 1		sp|Q9Y2K1|ZBTB1_HUMAN	1	0	MS/MS	STY:79.9663@DCNES(0.6646)T(0.6646)DNDELEDEPEEPFY(0.6708)R;
DDDAYKTEDSDDIHFEPVVQMPEK	DDDAY[79.9663]KTEDSDDIHFEPVVQMPEK	K	V	1999	2022	24	3	5Y(79.9663)	sp|P49792|RBP2_HUMAN	P49792	RBP2_HUMAN	RANBP2	E3 SUMO-protein ligase RanBP2	RGPD3, RGPD4, RGPD5, RGPD8	sp|A6NKT7|RGPD3_HUMAN, sp|O14715|RGPD8_HUMAN, sp|Q7Z3J3|RGPD4_HUMAN, sp|Q99666|RGPD5_HUMAN	1	6247982	MS/MS	STY:79.9663@DDDAY(0.4782)KT(0.4782)EDS(0.0436)DDIHFEPVVQMPEK;
DDDAYKTEDSDDIHFEPVVQMPEK	DDDAY[79.9663]KT[79.9663]EDSDDIHFEPVVQMPEK	K	V	1999	2022	24	3	5Y(79.9663),7T(79.9663)	sp|P49792|RBP2_HUMAN	P49792	RBP2_HUMAN	RANBP2	E3 SUMO-protein ligase RanBP2	RGPD3, RGPD4, RGPD5, RGPD8	sp|A6NKT7|RGPD3_HUMAN, sp|O14715|RGPD8_HUMAN, sp|Q7Z3J3|RGPD4_HUMAN, sp|Q99666|RGPD5_HUMAN	1	3.5445e+06	MS/MS	STY:79.9663@DDDAY(0.6853)KT(0.6573)EDS(0.6573)DDIHFEPVVQMPEK;
DDDDIDLFGSDDEEESEEAK	DDDDIDLFGSDDEEES[79.9663]EEAK	K	R	97	116	20	2	16S(79.9663)	sp|P24534|EF1B_HUMAN	P24534	EF1B_HUMAN	EEF1B2	Elongation factor 1-beta			1	9.4810072E7	MS/MS	STY:79.9663@DDDDIDLFGS(0.2291)DDEEES(0.7709)EEAK;
DDDDIDLFGSDDEEESEEAK	DDDDIDLFGS[79.9663]DDEEESEEAK	K	R	97	116	20	2	10S(79.9663)	sp|P24534|EF1B_HUMAN	P24534	EF1B_HUMAN	EEF1B2	Elongation factor 1-beta			5	9.4810072E7	MS/MS	STY:79.9663@DDDDIDLFGS(0.9225)DDEEES(0.0775)EEAK;
DDDDIDLFGSDDEEESEEAKR	DDDDIDLFGS[79.9663]DDEEESEEAKR	K	L	97	117	21	3	10S(79.9663)	sp|P24534|EF1B_HUMAN	P24534	EF1B_HUMAN	EEF1B2	Elongation factor 1-beta			2	1.7089914E7	MS/MS	STY:79.9663@DDDDIDLFGS(0.9305)DDEEES(0.0695)EEAKR;
DDDSDDESQSSHTGK	DDDS[79.9663]DDESQSSHTGK	K	K	390	404	15	2	4S(79.9663)	sp|O94874-2|UFL1_HUMAN	O94874-2	UFL1_HUMAN	UFL1	Isoform 2 of E3 UFM1-protein ligase 1		sp|O94874-3|UFL1_HUMAN, sp|O94874|UFL1_HUMAN	1	0	MS/MS	STY:79.9663@DDDS(0.4100)DDES(0.1475)QS(0.1475)S(0.1475)HT(0.1475)GK;
DDEEKPKIEDVGSDEEDDSGK	DDEEKPKIEDVGSDEEDDS[79.9663]GK	K	D	243	263	21	3	19S(79.9663)	sp|P08238|HS90B_HUMAN	P08238	HS90B_HUMAN	HSP90AB1	Heat shock protein HSP 90-beta	HSP90AB2P	sp|Q58FF8|H90B2_HUMAN	1	7.6768208E7	MS/MS	STY:79.9663@DDEEKPKIEDVGS(0.0589)DEEDDS(0.9411)GK;
DDEEKPKIEDVGSDEEDDSGK	DDEEKPKIEDVGS[79.9663]DEEDDSGK	K	D	243	263	21	2,3	13S(79.9663)	sp|P08238|HS90B_HUMAN	P08238	HS90B_HUMAN	HSP90AB1	Heat shock protein HSP 90-beta	HSP90AB2P	sp|Q58FF8|H90B2_HUMAN	4	7.6768208E7	MS/MS	STY:79.9663@DDEEKPKIEDVGS(0.9383)DEEDDS(0.0617)GK;
DDFESEEEDVK	DDFES[79.9663]EEEDVK	K	S	1290	1300	11	2	5S(79.9663)	sp|Q7Z6E9-2|RBBP6_HUMAN	Q7Z6E9-2	RBBP6_HUMAN	RBBP6	Isoform 2 of E3 ubiquitin-protein ligase RBBP6		sp|Q7Z6E9-4|RBBP6_HUMAN, sp|Q7Z6E9|RBBP6_HUMAN	1	0	MS/MS	STY:79.9663@DDFES(1.0000)EEEDVK;
DDQEWESPSPPKPTVFISGVIAR	DDQEWESPS[79.9663]PPKPTVFISGVIAR	K	G	43	65	23	3	9S(79.9663)	sp|P51397|DAP1_HUMAN	P51397	DAP1_HUMAN	DAP	Death-associated protein 1			1	0	MS/MS	STY:79.9663@DDQEWES(0.0206)PS(0.8941)PPKPT(0.0196)VFIS(0.0657)GVIAR;
DDQEWESPSPPKPTVFISGVIAR	DDQEWES[79.9663]PSPPKPTVFISGVIAR	K	G	43	65	23	3	7S(79.9663)	sp|P51397|DAP1_HUMAN	P51397	DAP1_HUMAN	DAP	Death-associated protein 1			3	7891443	MS/MS	STY:79.9663@DDQEWES(0.4868)PS(0.4868)PPKPT(0.0132)VFIS(0.0132)GVIAR;
DDSHSAEDSEDEKEDHK	DDSHS[79.9663]AEDS[79.9663]EDEKEDHK	K	N	71	87	17	2,3	5S(79.9663),9S(79.9663)	sp|Q9H1E3|NUCKS_HUMAN	Q9H1E3	NUCKS_HUMAN	NUCKS1	Nuclear ubiquitous casein and cyclin-dependent kinase substrate 1		sp|Q9H1E3-2|NUCKS_HUMAN	4	3.44657024E8	MS/MS	STY:79.9663@DDS(0.1728)HS(0.9136)AEDS(0.9136)EDEKEDHK;
DDSTHESLSQESESEEDGIHVDSQK	DDSTHESLSQESES[79.9663]EEDGIHVDS[79.9663]QK	K	A	108	132	25	3	14S(79.9663),23S(79.9663)	sp|Q9H6T3-2|RPAP3_HUMAN	Q9H6T3-2	RPAP3_HUMAN	RPAP3	Isoform 2 of RNA polymerase II-associated protein 3		sp|Q9H6T3|RPAP3_HUMAN	1	1.073069E7	MS/MS	STY:79.9663@DDS(0.1295)T(0.1295)HES(0.1295)LS(0.1295)QES(0.1295)ES(0.6701)EEDGIHVDS(0.6824)QK;
DDSHSAEDSEDEKEDHK	DDS[79.9663]HSAEDSEDEKEDHK	K	N	71	87	17	3	3S(79.9663)	sp|Q9H1E3|NUCKS_HUMAN	Q9H1E3	NUCKS_HUMAN	NUCKS1	Nuclear ubiquitous casein and cyclin-dependent kinase substrate 1		sp|Q9H1E3-2|NUCKS_HUMAN	2	6.6283864E7	MS/MS	STY:79.9663@DDS(0.4267)HS(0.4267)AEDS(0.1466)EDEKEDHK;
DDSHSAEDSEDEK	DDS[79.9663]HSAEDS[79.9663]EDEK	K	E	71	83	13	2	3S(79.9663),9S(79.9663)	sp|Q9H1E3|NUCKS_HUMAN	Q9H1E3	NUCKS_HUMAN	NUCKS1	Nuclear ubiquitous casein and cyclin-dependent kinase substrate 1		sp|Q9H1E3-2|NUCKS_HUMAN	2	1.00669288E8	MS/MS	STY:79.9663@DDS(0.6569)HS(0.6569)AEDS(0.6861)EDEK;
DDSHSAEDSEDEK	DDS[79.9663]HS[79.9663]AEDSEDEK	K	E	71	83	13	2	3S(79.9663),5S(79.9663)	sp|Q9H1E3|NUCKS_HUMAN	Q9H1E3	NUCKS_HUMAN	NUCKS1	Nuclear ubiquitous casein and cyclin-dependent kinase substrate 1		sp|Q9H1E3-2|NUCKS_HUMAN	1	7.863124E7	MS/MS	STY:79.9663@DDS(0.6667)HS(0.6667)AEDS(0.6667)EDEK;
DDSHSAEDSEDEKEDHK	DDS[79.9663]HS[79.9663]AEDSEDEKEDHK	K	N	71	87	17	2,3	3S(79.9663),5S(79.9663)	sp|Q9H1E3|NUCKS_HUMAN	Q9H1E3	NUCKS_HUMAN	NUCKS1	Nuclear ubiquitous casein and cyclin-dependent kinase substrate 1		sp|Q9H1E3-2|NUCKS_HUMAN	4	3.443792E8	MS/MS	STY:79.9663@DDS(0.8367)HS(0.8367)AEDS(0.3266)EDEKEDHK;
DDSHSAEDSEDEK	DDS[79.9663]HS[79.9663]AEDS[79.9663]EDEK	K	E	71	83	13	2	3S(79.9663),5S(79.9663),9S(79.9663)	sp|Q9H1E3|NUCKS_HUMAN	Q9H1E3	NUCKS_HUMAN	NUCKS1	Nuclear ubiquitous casein and cyclin-dependent kinase substrate 1		sp|Q9H1E3-2|NUCKS_HUMAN	3	8874236	MS/MS	STY:79.9663@DDS(1.0000)HS(1.0000)AEDS(1.0000)EDEK;
DDSHSAEDSEDEKEDHK	DDS[79.9663]HS[79.9663]AEDS[79.9663]EDEKEDHK	K	N	71	87	17	2,3	3S(79.9663),5S(79.9663),9S(79.9663)	sp|Q9H1E3|NUCKS_HUMAN	Q9H1E3	NUCKS_HUMAN	NUCKS1	Nuclear ubiquitous casein and cyclin-dependent kinase substrate 1		sp|Q9H1E3-2|NUCKS_HUMAN	6	1.41563072E8	MS/MS	STY:79.9663@DDS(1.0000)HS(1.0000)AEDS(1.0000)EDEKEDHK;
DDSTHESLSQESESEEDGIHVDSQK	DDS[79.9663]THESLSQESESEEDGIHVDS[79.9663]QK	K	A	108	132	25	3	23S(79.9663),3S(79.9663)	sp|Q9H6T3-2|RPAP3_HUMAN	Q9H6T3-2	RPAP3_HUMAN	RPAP3	Isoform 2 of RNA polymerase II-associated protein 3		sp|Q9H6T3|RPAP3_HUMAN	1	1.073069E7	MS/MS	STY:79.9663@DDS(0.2771)T(0.2771)HES(0.2771)LS(0.2771)QES(0.2771)ES(0.2771)EEDGIHVDS(0.3374)QK;
DDSTHESLSQESESEEDGIHVDSQK	DDS[79.9663]THESLSQES[79.9663]ES[79.9663]EEDGIHVDSQK	K	A	108	132	25	3	12S(79.9663),14S(79.9663),3S(79.9663)	sp|Q9H6T3-2|RPAP3_HUMAN	Q9H6T3-2	RPAP3_HUMAN	RPAP3	Isoform 2 of RNA polymerase II-associated protein 3		sp|Q9H6T3|RPAP3_HUMAN	1	1.0649472E7	MS/MS	STY:79.9663@DDS(0.4767)T(0.4767)HES(0.4767)LS(0.4767)QES(0.5315)ES(0.5329)EEDGIHVDS(0.0290)QK;
DDSTHESLSQESESEEDGIHVDSQK	DDS[79.9663]T[79.9663]HES[79.9663]LSQESESEEDGIHVDSQK	K	A	108	132	25	3	3S(79.9663),4T(79.9663),7S(79.9663)	sp|Q9H6T3-2|RPAP3_HUMAN	Q9H6T3-2	RPAP3_HUMAN	RPAP3	Isoform 2 of RNA polymerase II-associated protein 3		sp|Q9H6T3|RPAP3_HUMAN	1	1.0926472E7	MS/MS	STY:79.9663@DDS(0.4286)T(0.4286)HES(0.4286)LS(0.4286)QES(0.4286)ES(0.4286)EEDGIHVDS(0.4286)QK;
DEALSDGDDLRDFPSDLK	DEALS[79.9663]DGDDLRDFPSDLK	K	K	90	107	18	2,3	5S(79.9663)	sp|Q01831-2|XPC_HUMAN	Q01831-2	XPC_HUMAN	XPC	Isoform 2 of DNA repair protein complementing XP-C cells		sp|Q01831-3|XPC_HUMAN, sp|Q01831|XPC_HUMAN	2	1.1037711E7	MS/MS	STY:79.9663@DEALS(0.6997)DGDDLRDFPS(0.3003)DLK;
DEEDGKDSDEAEDAELYDDLYCPACDK	DEEDGKDS[79.9663]DEAEDAELYDDLYC[57.0215]PAC[57.0215]DK	K	S	295	321	27	3	22C(57.0215),25C(57.0215),8S(79.9663)	sp|Q5F1R6-2|DJC21_HUMAN	Q5F1R6-2	DJC21_HUMAN	DNAJC21	Isoform 2 of DnaJ homolog subfamily C member 21		sp|Q5F1R6-3|DJC21_HUMAN, sp|Q5F1R6|DJC21_HUMAN	1	0	MS/MS	STY:79.9663@DEEDGKDS(0.3333)DEAEDAELY(0.3333)DDLY(0.3333)CPACDK;
DEGIGSPDIWEDEK	DEGIGS[79.9663]PDIWEDEK	K	A	134	147	14	2	6S(79.9663)	sp|Q01664|TFAP4_HUMAN	Q01664	TFAP4_HUMAN	TFAP4	Transcription factor AP-4			1	0	MS/MS	STY:79.9663@DEGIGS(1.0000)PDIWEDEK;
DEILPTTPISEQK	DEILPTTPIS[79.9663]EQK	K	G	215	227	13	2	10S(79.9663)	sp|P23396|RS3_HUMAN	P23396	RS3_HUMAN	RPS3	Small ribosomal subunit protein uS3		sp|P23396-2|RS3_HUMAN	1	1.4639528E7	MS/MS	STY:79.9663@DEILPT(0.2877)T(0.0487)PIS(0.6636)EQK;
DEILPTTPISEQK	DEILPT[79.9663]TPISEQK	K	G	215	227	13	2	6T(79.9663)	sp|P23396|RS3_HUMAN	P23396	RS3_HUMAN	RPS3	Small ribosomal subunit protein uS3		sp|P23396-2|RS3_HUMAN	2	1.4639528E7	MS/MS	STY:79.9663@DEILPT(0.3333)T(0.3333)PIS(0.3333)EQK;
DELHIVEAEAMNYEGSPIK	DELHIVEAEAMNYEGS[79.9663]PIK	K	V	55	73	19	2,3	16S(79.9663)	sp|P06748-2|NPM_HUMAN	P06748-2	NPM_HUMAN	NPM1	Isoform 2 of Nucleophosmin		sp|P06748-3|NPM_HUMAN, sp|P06748|NPM_HUMAN	4	9.9096688E7	MS/MS	STY:79.9663@DELHIVEAEAMNY(0.0773)EGS(0.9227)PIK;
DELHIVEAEAMNYEGSPIK	DELHIVEAEAMNY[79.9663]EGSPIK	K	V	55	73	19	2,3	13Y(79.9663)	sp|P06748-2|NPM_HUMAN	P06748-2	NPM_HUMAN	NPM1	Isoform 2 of Nucleophosmin		sp|P06748-3|NPM_HUMAN, sp|P06748|NPM_HUMAN	10	1.80201824E8	MS/MS	STY:79.9663@DELHIVEAEAMNY(0.9418)EGS(0.0582)PIK;
DELHIVEAEAMNYEGSPIK	DELHIVEAEAM[15.9949]NYEGS[79.9663]PIK	K	V	55	73	19	2	11M(15.9949),16S(79.9663)	sp|P06748-2|NPM_HUMAN	P06748-2	NPM_HUMAN	NPM1	Isoform 2 of Nucleophosmin		sp|P06748-3|NPM_HUMAN, sp|P06748|NPM_HUMAN	1	4.5714856E7	MS/MS	STY:79.9663@DELHIVEAEAMNY(0.0599)EGS(0.9401)PIK;M:15.9949@DELHIVEAEAM(1.0000)NYEGSPIK;
DELHIVEAEAMNYEGSPIK	DELHIVEAEAM[15.9949]NY[79.9663]EGSPIK	K	V	55	73	19	2,3	11M(15.9949),13Y(79.9663)	sp|P06748-2|NPM_HUMAN	P06748-2	NPM_HUMAN	NPM1	Isoform 2 of Nucleophosmin		sp|P06748-3|NPM_HUMAN, sp|P06748|NPM_HUMAN	11	8.9774056E7	MS/MS	STY:79.9663@DELHIVEAEAMNY(0.9304)EGS(0.0696)PIK;M:15.9949@DELHIVEAEAM(1.0000)NYEGSPIK;
DELTDLDQSNVTEETPEGEEHHPVADTENK	DELTDLDQSNVTEETPEGEEHHPVADT[79.9663]ENK	K	E	229	258	30	3	27T(79.9663)	sp|Q8NC51-3|SERB1_HUMAN	Q8NC51-3	SERB1_HUMAN	SERBP1	Isoform 3 of SERPINE1 mRNA-binding protein 1		sp|Q8NC51-4|SERB1_HUMAN	1	1.8558506E7	MS/MS	STY:79.9663@DELT(0.2715)DLDQS(0.2715)NVT(0.0136)EET(0.0136)PEGEEHHPVADT(0.4298)ENK;
DELTDLDQSNVTEETPEGEEHHPVADTENK	DELT[79.9663]DLDQSNVTEETPEGEEHHPVADTENK	K	E	229	258	30	3	4T(79.9663)	sp|Q8NC51-3|SERB1_HUMAN	Q8NC51-3	SERB1_HUMAN	SERBP1	Isoform 3 of SERPINE1 mRNA-binding protein 1		sp|Q8NC51-4|SERB1_HUMAN	2	1.8558506E7	MS/MS	STY:79.9663@DELT(0.8896)DLDQS(0.0328)NVT(0.0259)EET(0.0259)PEGEEHHPVADT(0.0259)ENK;
DELTDLDQSNVTEETPEGEEHHPVADTENK	DELT[79.9663]DLDQSNVT[79.9663]EETPEGEEHHPVADTENK	K	E	229	258	30	3	12T(79.9663),4T(79.9663)	sp|Q8NC51-3|SERB1_HUMAN	Q8NC51-3	SERB1_HUMAN	SERBP1	Isoform 3 of SERPINE1 mRNA-binding protein 1		sp|Q8NC51-4|SERB1_HUMAN	1	0	MS/MS	STY:79.9663@DELT(0.6856)DLDQS(0.0640)NVT(0.6062)EET(0.6062)PEGEEHHPVADT(0.0379)ENK;
DELTESPK	DELT[79.9663]ESPK	K	Y	223	230	8	2	4T(79.9663)	sp|Q8NC51-2|SERB1_HUMAN	Q8NC51-2	SERB1_HUMAN	SERBP1	Isoform 2 of SERPINE1 mRNA-binding protein 1		sp|Q8NC51|SERB1_HUMAN	1	3.10589e+06	MS/MS	STY:79.9663@DELT(0.5000)ES(0.5000)PK;
DESCYDNAEAAFSDDEEDLNSK	DES[79.9663]C[57.0215]YDNAEAAFSDDEEDLNSK	K	G	524	545	22	3	3S(79.9663),4C(57.0215)	sp|Q68E01-2|INT3_HUMAN	Q68E01-2	INT3_HUMAN	INTS3	Isoform 2 of Integrator complex subunit 3		sp|Q68E01-3|INT3_HUMAN, sp|Q68E01-4|INT3_HUMAN, sp|Q68E01|INT3_HUMAN	1	0	MS/MS	STY:79.9663@DES(0.3144)CY(0.3144)DNAEAAFS(0.3144)DDEEDLNS(0.0569)K;
DETEYEYSGSEEEEEEVPEQEGEPSSIVNVPGESTLR	DETEY[79.9663]EY[79.9663]SGSEEEEEEVPEQEGEPSSIVNVPGESTLR	K	R	317	353	37	3	5Y(79.9663),7Y(79.9663)	sp|O95819-2|M4K4_HUMAN	O95819-2	M4K4_HUMAN	MAP4K4	Isoform 2 of Mitogen-activated protein kinase kinase kinase kinase 4		sp|O95819-3|M4K4_HUMAN, sp|O95819-4|M4K4_HUMAN, sp|O95819-5|M4K4_HUMAN, sp|O95819-6|M4K4_HUMAN, sp|O95819|M4K4_HUMAN	1	0	MS/MS	STY:79.9663@DET(0.0518)EY(0.5590)EY(0.4352)S(0.4352)GS(0.4352)EEEEEEVPEQEGEPS(0.0254)S(0.0254)IVNVPGES(0.0164)T(0.0164)LR;
DETFGEYSDNEEK	DETFGEY[79.9663]SDNEEK	K	A	1170	1182	13	2	7Y(79.9663)	sp|P32004-2|L1CAM_HUMAN	P32004-2	L1CAM_HUMAN	L1CAM	Isoform 2 of Neural cell adhesion molecule L1		sp|P32004-3|L1CAM_HUMAN	1	0	MS/MS	STY:79.9663@DET(0.0224)FGEY(0.4888)S(0.4888)DNEEK;
DFDIAEQNESSDEESLRK	DFDIAEQNES[79.9663]S[79.9663]DEESLRK	K	E	470	487	18	2	10S(79.9663),11S(79.9663)	sp|Q96KC8|DNJC1_HUMAN	Q96KC8	DNJC1_HUMAN	DNAJC1	DnaJ homolog subfamily C member 1			1	1.4564453E7	MS/MS	STY:79.9663@DFDIAEQNES(0.8544)S(0.8544)DEES(0.2911)LRK;
DFDSSEDEK	DFDS[79.9663]S[79.9663]EDEK	K	H	808	816	9	2	4S(79.9663),5S(79.9663)	sp|P46100-4|ATRX_HUMAN	P46100-4	ATRX_HUMAN	ATRX	Isoform 3 of Transcriptional regulator ATRX		sp|P46100-2|ATRX_HUMAN, sp|P46100-3|ATRX_HUMAN, sp|P46100-5|ATRX_HUMAN, sp|P46100-6|ATRX_HUMAN, sp|P46100|ATRX_HUMAN	1	6038171	MS/MS	STY:79.9663@DFDS(1.0000)S(1.0000)EDEK;
DFQDYMEPEEGCQGSPQR	DFQDYMEPEEGC[57.0215]QGS[79.9663]PQR	K	R	103	120	18	2	12C(57.0215),15S(79.9663)	sp|O43237-2|DC1L2_HUMAN	O43237-2	DC1L2_HUMAN	DYNC1LI2	Isoform 2 of Cytoplasmic dynein 1 light intermediate chain 2		sp|O43237|DC1L2_HUMAN	1	1.0480609E7	MS/MS	STY:79.9663@DFQDY(0.1791)MEPEEGCQGS(0.8209)PQR;
DFQDYMEPEEGCQGSPQRR	DFQDYMEPEEGC[57.0215]QGS[79.9663]PQRR	K	G	103	121	19	3	12C(57.0215),15S(79.9663)	sp|O43237-2|DC1L2_HUMAN	O43237-2	DC1L2_HUMAN	DYNC1LI2	Isoform 2 of Cytoplasmic dynein 1 light intermediate chain 2		sp|O43237|DC1L2_HUMAN	1	2.2833156E7	MS/MS	STY:79.9663@DFQDY(0.3374)MEPEEGCQGS(0.6626)PQRR;
DFQEYVEPGEDFPASPQRR	DFQEYVEPGEDFPAS[79.9663]PQRR	R	N	193	211	19	3	15S(79.9663)	sp|Q9Y6G9|DC1L1_HUMAN	Q9Y6G9	DC1L1_HUMAN	DYNC1LI1	Cytoplasmic dynein 1 light intermediate chain 1			3	6.7304224E7	MS/MS	STY:79.9663@DFQEY(0.0714)VEPGEDFPAS(0.9286)PQRR;
DGAVNGPSVVGDQTPIEPQTSIER	DGAVNGPSVVGDQT[79.9663]PIEPQTSIER	K	L	379	402	24	3	14T(79.9663)	sp|P49321-3|NASP_HUMAN	P49321-3	NASP_HUMAN	NASP	Isoform 3 of Nuclear autoantigenic sperm protein		sp|P49321-4|NASP_HUMAN, sp|P49321|NASP_HUMAN	1	0	MS/MS	STY:79.9663@DGAVNGPS(0.2015)VVGDQT(0.7270)PIEPQT(0.0358)S(0.0358)IER;
DGDEKTDEEAEGPYSDNEMLTHK	DGDEKT[79.9663]DEEAEGPY[79.9663]SDNEMLTHK	K	G	196	218	23	3	14Y(79.9663),6T(79.9663)	sp|Q6NUK4|REEP3_HUMAN	Q6NUK4	REEP3_HUMAN	REEP3	Receptor expression-enhancing protein 3			1	0	MS/MS	STY:79.9663@DGDEKT(0.6617)DEEAEGPY(0.6396)S(0.6396)DNEMLT(0.0591)HK;
DGDKSPMSSLQISNEK	DGDKSPMS[79.9663]SLQISNEK	K	N	491	506	16	2	8S(79.9663)	sp|Q9UER7-2|DAXX_HUMAN	Q9UER7-2	DAXX_HUMAN	DAXX	Isoform 2 of Death domain-associated protein 6		sp|Q9UER7-3|DAXX_HUMAN, sp|Q9UER7-4|DAXX_HUMAN, sp|Q9UER7-5|DAXX_HUMAN, sp|Q9UER7|DAXX_HUMAN	1	0	MS/MS	STY:79.9663@DGDKS(0.0724)PMS(0.4572)S(0.4572)LQIS(0.0131)NEK;
DGDKSPMSSLQISNEK	DGDKS[79.9663]PMSSLQISNEK	K	N	491	506	16	2	5S(79.9663)	sp|Q9UER7-2|DAXX_HUMAN	Q9UER7-2	DAXX_HUMAN	DAXX	Isoform 2 of Death domain-associated protein 6		sp|Q9UER7-3|DAXX_HUMAN, sp|Q9UER7-4|DAXX_HUMAN, sp|Q9UER7-5|DAXX_HUMAN, sp|Q9UER7|DAXX_HUMAN	1	0	MS/MS	STY:79.9663@DGDKS(0.4768)PMS(0.4768)S(0.0232)LQIS(0.0232)NEK;
DGDSYDPYDFSDTEEEMPQVHTPK	DGDSYDPYDFSDTEEEMPQVHT[79.9663]PK	K	T	746	769	24	3	22T(79.9663)	sp|P25205-2|MCM3_HUMAN	P25205-2	MCM3_HUMAN	MCM3	Isoform 2 of DNA replication licensing factor MCM3		sp|P25205|MCM3_HUMAN	1	2.637298E7	MS/MS	STY:79.9663@DGDS(0.0098)Y(0.0098)DPY(0.1725)DFS(0.2475)DT(0.2475)EEEMPQVHT(0.3129)PK;
DGDSYDPYDFSDTEEEMPQVHTPK	DGDSYDPYDFSDT[79.9663]EEEMPQVHTPK	K	T	746	769	24	3	13T(79.9663)	sp|P25205-2|MCM3_HUMAN	P25205-2	MCM3_HUMAN	MCM3	Isoform 2 of DNA replication licensing factor MCM3		sp|P25205|MCM3_HUMAN	1	2.5938196E7	MS/MS	STY:79.9663@DGDS(0.0123)Y(0.0123)DPY(0.0138)DFS(0.0188)DT(0.8804)EEEMPQVHT(0.0623)PK;
DGDSYDPYDFSDTEEEMPQVHTPK	DGDSYDPYDFSDT[79.9663]EEEM[15.9949]PQVHTPK	K	T	746	769	24	3	13T(79.9663),17M(15.9949)	sp|P25205-2|MCM3_HUMAN	P25205-2	MCM3_HUMAN	MCM3	Isoform 2 of DNA replication licensing factor MCM3		sp|P25205|MCM3_HUMAN	1	1.0976879E7	MS/MS	STY:79.9663@DGDS(0.0121)Y(0.0187)DPY(0.0236)DFS(0.0685)DT(0.8584)EEEMPQVHT(0.0187)PK;M:15.9949@DGDSYDPYDFSDTEEEM(1.0000)PQVHTPK;
DGDSYDPYDFSDTEEEMPQVHTPK	DGDSYDPYDFSDT[79.9663]EEEM[15.9949]PQVHT[79.9663]PK	K	T	746	769	24	3	13T(79.9663),17M(15.9949),22T(79.9663)	sp|P25205-2|MCM3_HUMAN	P25205-2	MCM3_HUMAN	MCM3	Isoform 2 of DNA replication licensing factor MCM3		sp|P25205|MCM3_HUMAN	1	3.8656528E7	MS/MS	STY:79.9663@DGDS(0.1402)Y(0.4308)DPY(0.3361)DFS(0.0651)DT(0.5163)EEEMPQVHT(0.5116)PK;M:15.9949@DGDSYDPYDFSDTEEEM(1.0000)PQVHTPK;
DGDSYDPYDFSDTEEEMPQVHTPK	DGDSYDPYDFS[79.9663]DTEEEMPQVHTPK	K	T	746	769	24	3	11S(79.9663)	sp|P25205-2|MCM3_HUMAN	P25205-2	MCM3_HUMAN	MCM3	Isoform 2 of DNA replication licensing factor MCM3		sp|P25205|MCM3_HUMAN	2	5.2311176E7	MS/MS	STY:79.9663@DGDS(0.0267)Y(0.0127)DPY(0.0786)DFS(0.8223)DT(0.0172)EEEMPQVHT(0.0424)PK;
DGDSYDPYDFSDTEEEMPQVHTPK	DGDSYDPYDFS[79.9663]DTEEEMPQVHT[79.9663]PK	K	T	746	769	24	3	11S(79.9663),22T(79.9663)	sp|P25205-2|MCM3_HUMAN	P25205-2	MCM3_HUMAN	MCM3	Isoform 2 of DNA replication licensing factor MCM3		sp|P25205|MCM3_HUMAN	1	0	MS/MS	STY:79.9663@DGDS(0.3397)Y(0.1421)DPY(0.1012)DFS(0.6673)DT(0.0796)EEEMPQVHT(0.6701)PK;
DGDSYDPYDFSDTEEEMPQVHTPK	DGDSYDPYDFS[79.9663]DTEEEM[15.9949]PQVHT[79.9663]PK	K	T	746	769	24	3	11S(79.9663),17M(15.9949),22T(79.9663)	sp|P25205-2|MCM3_HUMAN	P25205-2	MCM3_HUMAN	MCM3	Isoform 2 of DNA replication licensing factor MCM3		sp|P25205|MCM3_HUMAN	3	1.114325E7	MS/MS	STY:79.9663@DGDS(0.0417)Y(0.0417)DPY(0.0417)DFS(0.9130)DT(0.0486)EEEMPQVHT(0.9133)PK;M:15.9949@DGDSYDPYDFSDTEEEM(1.0000)PQVHTPK;
DGDSYDPYDFSDTEEEMPQVHTPK	DGDSYDPYDFS[79.9663]DT[79.9663]EEEMPQVHTPK	K	T	746	769	24	3	11S(79.9663),13T(79.9663)	sp|P25205-2|MCM3_HUMAN	P25205-2	MCM3_HUMAN	MCM3	Isoform 2 of DNA replication licensing factor MCM3		sp|P25205|MCM3_HUMAN	2	6.0405512E7	MS/MS	STY:79.9663@DGDS(0.0319)Y(0.1933)DPY(0.0731)DFS(0.8265)DT(0.8056)EEEMPQVHT(0.0696)PK;
DGDSYDPYDFSDTEEEMPQVHTPK	DGDSYDPYDFS[79.9663]DT[79.9663]EEEMPQVHT[79.9663]PK	K	T	746	769	24	3	11S(79.9663),13T(79.9663),22T(79.9663)	sp|P25205-2|MCM3_HUMAN	P25205-2	MCM3_HUMAN	MCM3	Isoform 2 of DNA replication licensing factor MCM3		sp|P25205|MCM3_HUMAN	1	4.2248096E7	MS/MS	STY:79.9663@DGDS(0.0936)Y(0.0936)DPY(0.3086)DFS(0.8374)DT(0.8434)EEEMPQVHT(0.8234)PK;
DGDSYDPYDFSDTEEEMPQVHTPK	DGDSYDPY[79.9663]DFSDTEEEMPQVHT[79.9663]PK	K	T	746	769	24	3	22T(79.9663),8Y(79.9663)	sp|P25205-2|MCM3_HUMAN	P25205-2	MCM3_HUMAN	MCM3	Isoform 2 of DNA replication licensing factor MCM3		sp|P25205|MCM3_HUMAN	1	6.3784304E7	MS/MS	STY:79.9663@DGDS(0.0257)Y(0.0257)DPY(0.4725)DFS(0.4725)DT(0.4725)EEEMPQVHT(0.5310)PK;
DGDSYDPYDFSDTEEEMPQVHTPK	DGDSYDPY[79.9663]DFSDTEEEM[15.9949]PQVHT[79.9663]PK	K	T	746	769	24	3	17M(15.9949),22T(79.9663),8Y(79.9663)	sp|P25205-2|MCM3_HUMAN	P25205-2	MCM3_HUMAN	MCM3	Isoform 2 of DNA replication licensing factor MCM3		sp|P25205|MCM3_HUMAN	2	3.8656528E7	MS/MS	STY:79.9663@DGDS(0.0382)Y(0.0382)DPY(0.9095)DFS(0.0857)DT(0.0423)EEEMPQVHT(0.8861)PK;M:15.9949@DGDSYDPYDFSDTEEEM(1.0000)PQVHTPK;
DGDSYDPYDFSDTEEEMPQVHTPK	DGDSYDPY[79.9663]DFS[79.9663]DTEEEMPQVHTPK	K	T	746	769	24	3	11S(79.9663),8Y(79.9663)	sp|P25205-2|MCM3_HUMAN	P25205-2	MCM3_HUMAN	MCM3	Isoform 2 of DNA replication licensing factor MCM3		sp|P25205|MCM3_HUMAN	1	6.3784304E7	MS/MS	STY:79.9663@DGDS(0.1531)Y(0.1531)DPY(0.6104)DFS(0.6473)DT(0.0509)EEEMPQVHT(0.3852)PK;
DGDSYDPYDFSDTEEEMPQVHTPK	DGDSYDPY[79.9663]DFS[79.9663]DTEEEMPQVHT[79.9663]PK	K	T	746	769	24	3	11S(79.9663),22T(79.9663),8Y(79.9663)	sp|P25205-2|MCM3_HUMAN	P25205-2	MCM3_HUMAN	MCM3	Isoform 2 of DNA replication licensing factor MCM3		sp|P25205|MCM3_HUMAN	1	4.2248096E7	MS/MS	STY:79.9663@DGDS(0.4525)Y(0.4525)DPY(0.5152)DFS(0.5152)DT(0.5152)EEEMPQVHT(0.5494)PK;
DGDSYDPYDFSDTEEEMPQVHTPK	DGDSY[79.9663]DPYDFSDTEEEMPQVHT[79.9663]PK	K	T	746	769	24	3	22T(79.9663),5Y(79.9663)	sp|P25205-2|MCM3_HUMAN	P25205-2	MCM3_HUMAN	MCM3	Isoform 2 of DNA replication licensing factor MCM3		sp|P25205|MCM3_HUMAN	1	6.3784304E7	MS/MS	STY:79.9663@DGDS(0.0342)Y(0.9127)DPY(0.0471)DFS(0.0471)DT(0.0471)EEEMPQVHT(0.9119)PK;
DGDSYDPYDFSDTEEEMPQVHTPK	DGDSY[79.9663]DPY[79.9663]DFSDTEEEMPQVHT[79.9663]PK	K	T	746	769	24	3	22T(79.9663),5Y(79.9663),8Y(79.9663)	sp|P25205-2|MCM3_HUMAN	P25205-2	MCM3_HUMAN	MCM3	Isoform 2 of DNA replication licensing factor MCM3		sp|P25205|MCM3_HUMAN	1	1.2263991E7	MS/MS	STY:79.9663@DGDS(0.0629)Y(0.9235)DPY(0.9235)DFS(0.0865)DT(0.0799)EEEMPQVHT(0.9237)PK;
DGDSYDPYDFSDTEEEMPQVHTPK	DGDS[79.9663]YDPYDFSDTEEEMPQVHTPK	K	T	746	769	24	3	4S(79.9663)	sp|P25205-2|MCM3_HUMAN	P25205-2	MCM3_HUMAN	MCM3	Isoform 2 of DNA replication licensing factor MCM3		sp|P25205|MCM3_HUMAN	1	2.5938196E7	MS/MS	STY:79.9663@DGDS(0.2878)Y(0.2878)DPY(0.0189)DFS(0.0088)DT(0.2655)EEEMPQVHT(0.1313)PK;
DGDSYDPYDFSDTEEEMPQVHTPK	DGDS[79.9663]YDPYDFSDTEEEM[15.9949]PQVHTPK	K	T	746	769	24	3	17M(15.9949),4S(79.9663)	sp|P25205-2|MCM3_HUMAN	P25205-2	MCM3_HUMAN	MCM3	Isoform 2 of DNA replication licensing factor MCM3		sp|P25205|MCM3_HUMAN	1	1.0976879E7	MS/MS	STY:79.9663@DGDS(0.3173)Y(0.3173)DPY(0.3173)DFS(0.0190)DT(0.0190)EEEMPQVHT(0.0101)PK;M:15.9949@DGDSYDPYDFSDTEEEM(1.0000)PQVHTPK;
DGDSYDPYDFSDTEEEMPQVHTPK	DGDS[79.9663]YDPYDFSDTEEEM[15.9949]PQVHT[79.9663]PK	K	T	746	769	24	3	17M(15.9949),22T(79.9663),4S(79.9663)	sp|P25205-2|MCM3_HUMAN	P25205-2	MCM3_HUMAN	MCM3	Isoform 2 of DNA replication licensing factor MCM3		sp|P25205|MCM3_HUMAN	2	0	MS/MS	STY:79.9663@DGDS(0.4251)Y(0.4251)DPY(0.4251)DFS(0.1141)DT(0.1141)EEEMPQVHT(0.4965)PK;M:15.9949@DGDSYDPYDFSDTEEEM(1.0000)PQVHTPK;
DGDSYDPYDFSDTEEEMPQVHTPK	DGDS[79.9663]Y[79.9663]DPYDFSDTEEEMPQVHTPK	K	T	746	769	24	3	4S(79.9663),5Y(79.9663)	sp|P25205-2|MCM3_HUMAN	P25205-2	MCM3_HUMAN	MCM3	Isoform 2 of DNA replication licensing factor MCM3		sp|P25205|MCM3_HUMAN	2	6.0405512E7	MS/MS	STY:79.9663@DGDS(0.3966)Y(0.3966)DPY(0.3966)DFS(0.3966)DT(0.3966)EEEMPQVHT(0.0172)PK;
DGDSYDPYDFSDTEEEMPQVHTPK	DGDS[79.9663]Y[79.9663]DPYDFSDTEEEMPQVHT[79.9663]PK	K	T	746	769	24	3	22T(79.9663),4S(79.9663),5Y(79.9663)	sp|P25205-2|MCM3_HUMAN	P25205-2	MCM3_HUMAN	MCM3	Isoform 2 of DNA replication licensing factor MCM3		sp|P25205|MCM3_HUMAN	2	4.2248096E7	MS/MS	STY:79.9663@DGDS(0.5804)Y(0.5804)DPY(0.0463)DFS(0.5804)DT(0.5804)EEEMPQVHT(0.6319)PK;
DGGSGNSTIIVSR	DGGS[79.9663]GNS[79.9663]TIIVSR	R	S	2359	2371	13	2	4S(79.9663),7S(79.9663)	sp|Q7Z6Z7-2|HUWE1_HUMAN	Q7Z6Z7-2	HUWE1_HUMAN	HUWE1	Isoform 2 of E3 ubiquitin-protein ligase HUWE1		sp|Q7Z6Z7-3|HUWE1_HUMAN, sp|Q7Z6Z7|HUWE1_HUMAN	1	0	MS/MS	STY:79.9663@DGGS(0.6516)GNS(0.6516)T(0.6516)IIVS(0.0451)R;
DGQDAIAQSPEK	DGQDAIAQS[79.9663]PEK	K	E	281	292	12	2	9S(79.9663)	sp|Q9NWH9|SLTM_HUMAN	Q9NWH9	SLTM_HUMAN	SLTM	SAFB-like transcription modulator			7	3.3211062E7	MS/MS	STY:79.9663@DGQDAIAQS(1.0000)PEK;
DGQVINETSQHHDDLE	DGQVINET[79.9663]SQHHDDLE	R	-	451	466	16	2,3	8T(79.9663)	sp|P08670|VIME_HUMAN	P08670	VIME_HUMAN	VIM	Vimentin			3	3623917	MS/MS	STY:79.9663@DGQVINET(0.8123)S(0.1877)QHHDDLE;
DGTAPPPQSPGSPGTGQDEEWSDEESPRK	DGTAPPPQSPGSPGT[79.9663]GQDEEWSDEESPRK	R	A	333	361	29	3	15T(79.9663)	sp|Q9UKS6|PACN3_HUMAN	Q9UKS6	PACN3_HUMAN	PACSIN3	Protein kinase C and casein kinase substrate in neurons protein 3			1	6.6466776E7	MS/MS	STY:79.9663@DGT(0.0314)APPPQS(0.0544)PGS(0.0544)PGT(0.7185)GQDEEWS(0.0706)DEES(0.0706)PRK;
DGTAPPPQSPGSPGTGQDEEWSDEESPR	DGTAPPPQSPGS[79.9663]PGTGQDEEWSDEESPR	R	K	333	360	28	3	12S(79.9663)	sp|Q9UKS6|PACN3_HUMAN	Q9UKS6	PACN3_HUMAN	PACSIN3	Protein kinase C and casein kinase substrate in neurons protein 3			1	6197356	MS/MS	STY:79.9663@DGT(0.0100)APPPQS(0.0137)PGS(0.3048)PGT(0.3048)GQDEEWS(0.3048)DEES(0.0619)PR;
DGTAPPPQSPGSPGTGQDEEWSDEESPRK	DGTAPPPQSPGS[79.9663]PGTGQDEEWSDEESPRK	R	A	333	361	29	3	12S(79.9663)	sp|Q9UKS6|PACN3_HUMAN	Q9UKS6	PACN3_HUMAN	PACSIN3	Protein kinase C and casein kinase substrate in neurons protein 3			1	5464295	MS/MS	STY:79.9663@DGT(0.0064)APPPQS(0.0074)PGS(0.2465)PGT(0.2465)GQDEEWS(0.2465)DEES(0.2465)PRK;
DGTAPPPQSPGSPGTGQDEEWSDEESPRK	DGTAPPPQS[79.9663]PGSPGTGQDEEWSDEESPRK	R	A	333	361	29	3	9S(79.9663)	sp|Q9UKS6|PACN3_HUMAN	Q9UKS6	PACN3_HUMAN	PACSIN3	Protein kinase C and casein kinase substrate in neurons protein 3			1	0	MS/MS	STY:79.9663@DGT(0.0127)APPPQS(0.3811)PGS(0.0458)PGT(0.1989)GQDEEWS(0.1807)DEES(0.1807)PRK;
DGTAPPPQSPGSPGTGQDEEWSDEESPRK	DGTAPPPQS[79.9663]PGS[79.9663]PGTGQDEEWSDEESPRK	R	A	333	361	29	3	12S(79.9663),9S(79.9663)	sp|Q9UKS6|PACN3_HUMAN	Q9UKS6	PACN3_HUMAN	PACSIN3	Protein kinase C and casein kinase substrate in neurons protein 3			1	3.9129176E7	MS/MS	STY:79.9663@DGT(0.3091)APPPQS(0.3382)PGS(0.3382)PGT(0.3382)GQDEEWS(0.3382)DEES(0.3382)PRK;
DGTAPPPQSPGSPGTGQDEEWSDEESPRK	DGT[79.9663]APPPQSPGSPGTGQDEEWSDEESPRK	R	A	333	361	29	3	3T(79.9663)	sp|Q9UKS6|PACN3_HUMAN	Q9UKS6	PACN3_HUMAN	PACSIN3	Protein kinase C and casein kinase substrate in neurons protein 3			2	6.5500768E7	MS/MS	STY:79.9663@DGT(0.7831)APPPQS(0.0966)PGS(0.0282)PGT(0.0282)GQDEEWS(0.0282)DEES(0.0357)PRK;
DGVLTLANNVTPAK	DGVLT[79.9663]LANNVTPAK	K	D	561	574	14	2	5T(79.9663)	sp|P27816-6|MAP4_HUMAN	P27816-6	MAP4_HUMAN	MAP4	Isoform 6 of Microtubule-associated protein 4		sp|P27816|MAP4_HUMAN	1	0	MS/MS	STY:79.9663@DGVLT(0.7283)LANNVT(0.2717)PAK;
DHFGLEGDEESTMLEDSVSPKK	DHFGLEGDEESTMLEDS[79.9663]VSPKK	K	S	407	428	22	3	17S(79.9663)	sp|Q9Y490|TLN1_HUMAN	Q9Y490	TLN1_HUMAN	TLN1	Talin-1			3	1.4363296E7	MS/MS	STY:79.9663@DHFGLEGDEES(0.0156)T(0.0156)MLEDS(0.4844)VS(0.4844)PKK;
DHFGLEGDEESTMLEDSVSPKK	DHFGLEGDEEST[79.9663]M[15.9949]LEDSVSPKK	K	S	407	428	22	3	12T(79.9663),13M(15.9949)	sp|Q9Y490|TLN1_HUMAN	Q9Y490	TLN1_HUMAN	TLN1	Talin-1			1	0	MS/MS	STY:79.9663@DHFGLEGDEES(0.0353)T(0.3216)MLEDS(0.3216)VS(0.3216)PKK;M:15.9949@DHFGLEGDEESTM(1.0000)LEDSVSPKK;
DHFGLEGDEESTMLEDSVSPKK	DHFGLEGDEES[79.9663]TM[15.9949]LEDSVSPKK	K	S	407	428	22	3	11S(79.9663),13M(15.9949)	sp|Q9Y490|TLN1_HUMAN	Q9Y490	TLN1_HUMAN	TLN1	Talin-1			1	4.02511e+06	MS/MS	STY:79.9663@DHFGLEGDEES(0.4747)T(0.4747)MLEDS(0.0253)VS(0.0253)PKK;M:15.9949@DHFGLEGDEESTM(1.0000)LEDSVSPKK;
DHFYSDDDAIEADSEGDAEPCDK	DHFY[79.9663]SDDDAIEADS[79.9663]EGDAEPC[57.0215]DK	K	E	54	76	23	3	14S(79.9663),21C(57.0215),4Y(79.9663)	sp|Q9Y3B9|RRP15_HUMAN	Q9Y3B9	RRP15_HUMAN	RRP15	RRP15-like protein			3	2.6357132E7	MS/MS	STY:79.9663@DHFY(0.6569)S(0.6569)DDDAIEADS(0.6862)EGDAEPCDK;
DHFYSDDDAIEADSEGDAEPCDK	DHFY[79.9663]S[79.9663]DDDAIEADSEGDAEPC[57.0215]DK	K	E	54	76	23	3	21C(57.0215),4Y(79.9663),5S(79.9663)	sp|Q9Y3B9|RRP15_HUMAN	Q9Y3B9	RRP15_HUMAN	RRP15	RRP15-like protein			1	5881946	MS/MS	STY:79.9663@DHFY(0.6667)S(0.6667)DDDAIEADS(0.6667)EGDAEPCDK;
DHGFEVASTSPEDESPGSNPEPDATPFQEGLR	DHGFEVAS[79.9663]TSPEDESPGSNPEPDATPFQEGLR	K	T	143	174	32	3	8S(79.9663)	sp|P55211-2|CASP9_HUMAN	P55211-2	CASP9_HUMAN	CASP9	Isoform 2 of Caspase-9		sp|P55211-4|CASP9_HUMAN, sp|P55211|CASP9_HUMAN	1	0	MS/MS	STY:79.9663@DHGFEVAS(0.4326)T(0.4326)S(0.0294)PEDES(0.0294)PGS(0.0210)NPEPDAT(0.0548)PFQEGLR;
DHNSEDEDEDKYADDIDMPGQNFDSK	DHNSEDEDEDKY[79.9663]ADDIDMPGQNFDSK	K	R	232	257	26	3	12Y(79.9663)	sp|O95391|SLU7_HUMAN	O95391	SLU7_HUMAN	SLU7	Pre-mRNA-splicing factor SLU7			1	0	MS/MS	STY:79.9663@DHNS(0.0597)EDEDEDKY(0.9081)ADDIDMPGQNFDS(0.0323)K;
DHSPTPSVFNSDEER	DHSPT[79.9663]PSVFNSDEER	R	Y	416	430	15	2	5T(79.9663)	sp|Q6UN15-3|FIP1_HUMAN	Q6UN15-3	FIP1_HUMAN	FIP1L1	Isoform 3 of Pre-mRNA 3'-end-processing factor FIP1		sp|Q6UN15-5|FIP1_HUMAN, sp|Q6UN15|FIP1_HUMAN	1	0	MS/MS	STY:79.9663@DHS(0.3241)PT(0.6403)PS(0.0186)VFNS(0.0171)DEER;
DHSDSDDQMLVAK	DHS[79.9663]DS[79.9663]DDQMLVAK	K	R	113	125	13	2	3S(79.9663),5S(79.9663)	sp|Q9NW75-2|GPTC2_HUMAN	Q9NW75-2	GPTC2_HUMAN	GPATCH2	Isoform 2 of G patch domain-containing protein 2		sp|Q9NW75|GPTC2_HUMAN	1	0	MS/MS	STY:79.9663@DHS(1.0000)DS(1.0000)DDQMLVAK;
DHSPTPSVFNSDEER	DHS[79.9663]PTPSVFNSDEER	R	Y	416	430	15	2,3	3S(79.9663)	sp|Q6UN15-3|FIP1_HUMAN	Q6UN15-3	FIP1_HUMAN	FIP1L1	Isoform 3 of Pre-mRNA 3'-end-processing factor FIP1		sp|Q6UN15-5|FIP1_HUMAN, sp|Q6UN15|FIP1_HUMAN	2	1.09623e+06	MS/MS	STY:79.9663@DHS(0.4726)PT(0.4726)PS(0.0274)VFNS(0.0274)DEER;
DHSPTPSVFNSDEER	DHS[79.9663]PT[79.9663]PSVFNSDEER	R	Y	416	430	15	2	3S(79.9663),5T(79.9663)	sp|Q6UN15-3|FIP1_HUMAN	Q6UN15-3	FIP1_HUMAN	FIP1L1	Isoform 3 of Pre-mRNA 3'-end-processing factor FIP1		sp|Q6UN15-5|FIP1_HUMAN, sp|Q6UN15|FIP1_HUMAN	1	0	MS/MS	STY:79.9663@DHS(0.5322)PT(0.4893)PS(0.4893)VFNS(0.4893)DEER;
DHSPTPSVFNSDEERYR	DHS[79.9663]PT[79.9663]PSVFNSDEERYR	R	Y	416	432	17	3	3S(79.9663),5T(79.9663)	sp|Q6UN15-3|FIP1_HUMAN	Q6UN15-3	FIP1_HUMAN	FIP1L1	Isoform 3 of Pre-mRNA 3'-end-processing factor FIP1		sp|Q6UN15-5|FIP1_HUMAN, sp|Q6UN15|FIP1_HUMAN	1	1.0260613E7	MS/MS	STY:79.9663@DHS(0.6197)PT(0.5478)PS(0.5478)VFNS(0.1424)DEERY(0.1424)R;
DHSSQSEEEVVEGEK	DHS[79.9663]SQSEEEVVEGEK	R	E	75	89	15	2	3S(79.9663)	sp|O60238-2|BNI3L_HUMAN	O60238-2	BNI3L_HUMAN	BNIP3L	Isoform 2 of BCL2/adenovirus E1B 19 kDa protein-interacting protein 3-like		sp|O60238|BNI3L_HUMAN	1	1800750	MS/MS	STY:79.9663@DHS(0.3333)S(0.3333)QS(0.3333)EEEVVEGEK;
DHTVSGDEDYCPR	DHTVSGDEDY[79.9663]C[57.0215]PR	K	S	939	951	13	2	10Y(79.9663),11C(57.0215)	sp|Q9UIG0-2|BAZ1B_HUMAN	Q9UIG0-2	BAZ1B_HUMAN	BAZ1B	Isoform 2 of Tyrosine-protein kinase BAZ1B		sp|Q9UIG0|BAZ1B_HUMAN	1	0	MS/MS	STY:79.9663@DHT(0.0818)VS(0.0818)GDEDY(0.8365)CPR;
DHTVSGDEDYCPR	DHT[79.9663]VSGDEDYC[57.0215]PR	K	S	939	951	13	2	11C(57.0215),3T(79.9663)	sp|Q9UIG0-2|BAZ1B_HUMAN	Q9UIG0-2	BAZ1B_HUMAN	BAZ1B	Isoform 2 of Tyrosine-protein kinase BAZ1B		sp|Q9UIG0|BAZ1B_HUMAN	1	0	MS/MS	STY:79.9663@DHT(0.8988)VS(0.0614)GDEDY(0.0398)CPR;
DIDHETVVEEQIIGENSPPDYSEYMTGK	DIDHETVVEEQIIGENSPPDYSEY[79.9663]MTGK	K	K	231	258	28	3	24Y(79.9663)	sp|P25490|TYY1_HUMAN	P25490	TYY1_HUMAN	YY1	Transcriptional repressor protein YY1			1	2.3229402E7	MS/MS	STY:79.9663@DIDHET(0.2488)VVEEQIIGENS(0.0780)PPDY(0.0780)S(0.0780)EY(0.5092)MT(0.0079)GK;
DIDHETVVEEQIIGENSPPDYSEYMTGK	DIDHETVVEEQIIGENSPPDYS[79.9663]EYMTGK	K	K	231	258	28	3	22S(79.9663)	sp|P25490|TYY1_HUMAN	P25490	TYY1_HUMAN	YY1	Transcriptional repressor protein YY1			1	2.3229402E7	MS/MS	STY:79.9663@DIDHET(0.0160)VVEEQIIGENS(0.0182)PPDY(0.0226)S(0.9091)EY(0.0171)MT(0.0171)GK;
DIDHETVVEEQIIGENSPPDYSEYMTGK	DIDHETVVEEQIIGENS[79.9663]PPDYSEYMTGK	K	K	231	258	28	3	17S(79.9663)	sp|P25490|TYY1_HUMAN	P25490	TYY1_HUMAN	YY1	Transcriptional repressor protein YY1			1	2.3229402E7	MS/MS	STY:79.9663@DIDHET(0.0153)VVEEQIIGENS(0.9293)PPDY(0.0141)S(0.0141)EY(0.0136)MT(0.0136)GK;
DIDHETVVEEQIIGENSPPDYSEYMTGK	DIDHETVVEEQIIGENS[79.9663]PPDYSEYM[15.9949]TGK	K	K	231	258	28	3	17S(79.9663),25M(15.9949)	sp|P25490|TYY1_HUMAN	P25490	TYY1_HUMAN	YY1	Transcriptional repressor protein YY1			1	4.24681e+06	MS/MS	STY:79.9663@DIDHET(0.0127)VVEEQIIGENS(0.8036)PPDY(0.0300)S(0.0300)EY(0.0619)MT(0.0619)GK;M:15.9949@DIDHETVVEEQIIGENSPPDYSEYM(1.0000)TGK;
DIDHETVVEEQIIGENSPPDYSEYMTGK	DIDHET[79.9663]VVEEQIIGENSPPDYSEYMTGK	K	K	231	258	28	3	6T(79.9663)	sp|P25490|TYY1_HUMAN	P25490	TYY1_HUMAN	YY1	Transcriptional repressor protein YY1			1	0	MS/MS	STY:79.9663@DIDHET(0.4872)VVEEQIIGENS(0.1370)PPDY(0.0839)S(0.1777)EY(0.0880)MT(0.0262)GK;
DIDISSPEFK	DIDIS[79.9663]SPEFK	K	I	172	181	10	2	5S(79.9663)	sp|Q09666|AHNK_HUMAN	Q09666	AHNK_HUMAN	AHNAK	Neuroblast differentiation-associated protein AHNAK			4	1.425274E7	MS/MS	STY:79.9663@DIDIS(0.5000)S(0.5000)PEFK;
DIEISTEEEK	DIEIS[79.9663]T[79.9663]EEEK	R	D	340	349	10	2	5S(79.9663),6T(79.9663)	sp|Q4G0J3-3|LARP7_HUMAN	Q4G0J3-3	LARP7_HUMAN	LARP7	Isoform 3 of La-related protein 7		sp|Q4G0J3|LARP7_HUMAN	1	0	MS/MS	STY:79.9663@DIEIS(1.0000)T(1.0000)EEEK;
DIGSESTEDQAMEDIK	DIGSES[79.9663]TEDQAM[15.9949]EDIK	K	Q	58	73	16	2	12M(15.9949),6S(79.9663)	sp|P02662|CASA1_BOVIN	P02662	CASA1_BOVIN	CSN1S1	Alpha-S1-casein			1	0	MS/MS	STY:79.9663@DIGS(0.2628)ES(0.3686)T(0.3686)EDQAMEDIK;M:15.9949@DIGSESTEDQAM(1.0000)EDIK;
DIGSESTEDQAMEDIK	DIGSES[79.9663]T[79.9663]EDQAM[15.9949]EDIK	K	Q	58	73	16	2	12M(15.9949),6S(79.9663),7T(79.9663)	sp|P02662|CASA1_BOVIN	P02662	CASA1_BOVIN	CSN1S1	Alpha-S1-casein			3	9.1719312E7	MS/MS	STY:79.9663@DIGS(0.1278)ES(0.9361)T(0.9361)EDQAMEDIK;M:15.9949@DIGSESTEDQAM(1.0000)EDIK;
DIGSESTEDQAMEDIK	DIGS[79.9663]ESTEDQAMEDIK	K	Q	58	73	16	2	4S(79.9663)	sp|P02662|CASA1_BOVIN	P02662	CASA1_BOVIN	CSN1S1	Alpha-S1-casein			1	7423604	MS/MS	STY:79.9663@DIGS(0.8560)ES(0.0720)T(0.0720)EDQAMEDIK;
DIGSESTEDQAMEDIK	DIGS[79.9663]ESTEDQAM[15.9949]EDIK	K	Q	58	73	16	2	12M(15.9949),4S(79.9663)	sp|P02662|CASA1_BOVIN	P02662	CASA1_BOVIN	CSN1S1	Alpha-S1-casein			1	0	MS/MS	STY:79.9663@DIGS(0.3333)ES(0.3333)T(0.3333)EDQAMEDIK;M:15.9949@DIGSESTEDQAM(1.0000)EDIK;
DIGSESTEDQAMEDIK	DIGS[79.9663]EST[79.9663]EDQAMEDIK	K	Q	58	73	16	2	4S(79.9663),7T(79.9663)	sp|P02662|CASA1_BOVIN	P02662	CASA1_BOVIN	CSN1S1	Alpha-S1-casein			1	7.7552864E7	MS/MS	STY:79.9663@DIGS(0.9367)ES(0.1267)T(0.9366)EDQAMEDIK;
DIGSESTEDQAMEDIK	DIGS[79.9663]ES[79.9663]TEDQAMEDIK	K	Q	58	73	16	2	4S(79.9663),6S(79.9663)	sp|P02662|CASA1_BOVIN	P02662	CASA1_BOVIN	CSN1S1	Alpha-S1-casein			8	7.7552864E7	MS/MS	STY:79.9663@DIGS(0.9360)ES(0.9360)T(0.1281)EDQAMEDIK;
DIGSESTEDQAMEDIK	DIGS[79.9663]ES[79.9663]TEDQAM[15.9949]EDIK	K	Q	58	73	16	2	12M(15.9949),4S(79.9663),6S(79.9663)	sp|P02662|CASA1_BOVIN	P02662	CASA1_BOVIN	CSN1S1	Alpha-S1-casein			7	9.1719312E7	MS/MS	STY:79.9663@DIGS(0.9421)ES(0.9421)T(0.1158)EDQAMEDIK;M:15.9949@DIGSESTEDQAM(1.0000)EDIK;
DIIRQPSEEEIIK	DIIRQPS[79.9663]EEEIIK	K	L	131	143	13	2	7S(79.9663)	sp|Q15121-2|PEA15_HUMAN	Q15121-2	PEA15_HUMAN	PEA15	Isoform 2 of Astrocytic phosphoprotein PEA-15		sp|Q15121|PEA15_HUMAN	1	1.9350446E7	MS/MS	STY:79.9663@DIIRQPS(1.0000)EEEIIK;
DIKEESDEEEEDDEESGR	DIKEES[79.9663]DEEEEDDEESGR	K	L	200	217	18	2	6S(79.9663)	sp|Q96EV2|RBM33_HUMAN	Q96EV2	RBM33_HUMAN	RBM33	RNA-binding protein 33		sp|Q96EV2-2|RBM33_HUMAN	2	0	MS/MS	STY:79.9663@DIKEES(0.8082)DEEEEDDEES(0.1918)GR;
DIKEESDEEEEDDEESGRLR	DIKEES[79.9663]DEEEEDDEESGRLR	K	F	200	219	20	3	6S(79.9663)	sp|Q96EV2|RBM33_HUMAN	Q96EV2	RBM33_HUMAN	RBM33	RNA-binding protein 33		sp|Q96EV2-2|RBM33_HUMAN	1	0	MS/MS	STY:79.9663@DIKEES(0.9257)DEEEEDDEES(0.0743)GRLR;
DISEGGESPVVQSDEEEVQVDTALATSHTDR	DIS[79.9663]EGGESPVVQSDEEEVQVDTALAT[79.9663]SHTDR	R	E	228	258	31	3	26T(79.9663),3S(79.9663)	sp|Q96EV8-3|DTBP1_HUMAN	Q96EV8-3	DTBP1_HUMAN	DTNBP1	Isoform 3 of Dysbindin		sp|Q96EV8|DTBP1_HUMAN	1	0	MS/MS	STY:79.9663@DIS(0.4623)EGGES(0.1234)PVVQS(0.2060)DEEEVQVDT(0.0386)ALAT(0.3899)S(0.3899)HT(0.3899)DR;
DISGPSPSK	DIS[79.9663]GPSPSK	K	K	44	52	9	2	3S(79.9663)	sp|Q96GX9-3|MTNB_HUMAN	Q96GX9-3	MTNB_HUMAN	APIP	Isoform 2 of Methylthioribulose-1-phosphate dehydratase		sp|Q96GX9|MTNB_HUMAN	2	0	MS/MS	STY:79.9663@DIS(0.3333)GPS(0.3333)PS(0.3333)K;
DKDDQEWESPSPPKPTVFISGVIAR	DKDDQEWESPSPPKPTVFIS[79.9663]GVIAR	K	G	41	65	25	4	20S(79.9663)	sp|P51397|DAP1_HUMAN	P51397	DAP1_HUMAN	DAP	Death-associated protein 1			1	7034026	MS/MS	STY:79.9663@DKDDQEWES(0.0241)PS(0.4378)PPKPT(0.0384)VFIS(0.4997)GVIAR;
DKDDQEWESPSPPKPTVFISGVIAR	DKDDQEWESPSPPKPT[79.9663]VFISGVIAR	K	G	41	65	25	3	16T(79.9663)	sp|P51397|DAP1_HUMAN	P51397	DAP1_HUMAN	DAP	Death-associated protein 1			4	3.861056E8	MS/MS	STY:79.9663@DKDDQEWES(0.0425)PS(0.0286)PPKPT(0.8307)VFIS(0.0982)GVIAR;
DKDDQEWESPSPPKPTVFISGVIAR	DKDDQEWESPSPPKPT[79.9663]VFIS[79.9663]GVIAR	K	G	41	65	25	3	16T(79.9663),20S(79.9663)	sp|P51397|DAP1_HUMAN	P51397	DAP1_HUMAN	DAP	Death-associated protein 1			1	2.8453024E7	MS/MS	STY:79.9663@DKDDQEWES(0.4583)PS(0.4583)PPKPT(0.5386)VFIS(0.5447)GVIAR;
DKDDQEWESPSPPKPTVFISGVIAR	DKDDQEWESPS[79.9663]PPKPTVFISGVIAR	K	G	41	65	25	3	11S(79.9663)	sp|P51397|DAP1_HUMAN	P51397	DAP1_HUMAN	DAP	Death-associated protein 1			6	4.90425696E8	MS/MS	STY:79.9663@DKDDQEWES(0.0197)PS(0.9098)PPKPT(0.0448)VFIS(0.0257)GVIAR;
DKDDQEWESPSPPKPTVFISGVIAR	DKDDQEWES[79.9663]PSPPKPTVFISGVIAR	K	G	41	65	25	3	9S(79.9663)	sp|P51397|DAP1_HUMAN	P51397	DAP1_HUMAN	DAP	Death-associated protein 1			7	4.87710848E8	MS/MS	STY:79.9663@DKDDQEWES(0.9338)PS(0.0252)PPKPT(0.0205)VFIS(0.0205)GVIAR;
DKDDQEWESPSPPKPTVFISGVIAR	DKDDQEWES[79.9663]PS[79.9663]PPKPTVFISGVIAR	K	G	41	65	25	3	11S(79.9663),9S(79.9663)	sp|P51397|DAP1_HUMAN	P51397	DAP1_HUMAN	DAP	Death-associated protein 1			2	2.8453024E7	MS/MS	STY:79.9663@DKDDQEWES(0.9060)PS(0.9059)PPKPT(0.0953)VFIS(0.0928)GVIAR;
DKEADEEGGENGPADQGFQPQEEEEREDSDTEEQVPEALER	DKEADEEGGENGPADQGFQPQEEEEREDS[79.9663]DTEEQVPEALER	K	K	4987	5027	41	4	29S(79.9663)	sp|Q9NU22|MDN1_HUMAN	Q9NU22	MDN1_HUMAN	MDN1	Midasin			1	4561966	MS/MS	STY:79.9663@DKEADEEGGENGPADQGFQPQEEEEREDS(0.5000)DT(0.5000)EEQVPEALER;
DKEVSDDEAEEK	DKEVS[79.9663]DDEAEEK	R	E	349	360	12	2	5S(79.9663)	sp|P07900-2|HS90A_HUMAN	P07900-2	HS90A_HUMAN	HSP90AA1	Isoform 2 of Heat shock protein HSP 90-alpha		sp|P07900|HS90A_HUMAN	3	1.16175552E8	MS/MS	STY:79.9663@DKEVS(1.0000)DDEAEEK;
DKFSPFPVQDRPESSLVFK	DKFSPFPVQDRPES[79.9663]SLVFK	K	D	1185	1203	19	3	14S(79.9663)	sp|Q9UQ35|SRRM2_HUMAN	Q9UQ35	SRRM2_HUMAN	SRRM2	Serine/arginine repetitive matrix protein 2		sp|Q9UQ35-2|SRRM2_HUMAN	1	6576660	MS/MS	STY:79.9663@DKFS(0.1120)PFPVQDRPES(0.4440)S(0.4440)LVFK;
DKSPVREPIDNLTPEER	DKSPVREPIDNLT[79.9663]PEER	K	D	134	150	17	2,3	13T(79.9663)	sp|Q14498-2|RBM39_HUMAN	Q14498-2	RBM39_HUMAN	RBM39	Isoform 2 of RNA-binding protein 39		sp|Q14498-3|RBM39_HUMAN, sp|Q14498|RBM39_HUMAN	3	1.64970656E8	MS/MS	STY:79.9663@DKS(0.1091)PVREPIDNLT(0.8909)PEER;
DKSPVREPIDNLTPEER	DKS[79.9663]PVREPIDNLTPEER	K	D	134	150	17	3	3S(79.9663)	sp|Q14498-2|RBM39_HUMAN	Q14498-2	RBM39_HUMAN	RBM39	Isoform 2 of RNA-binding protein 39		sp|Q14498-3|RBM39_HUMAN, sp|Q14498|RBM39_HUMAN	4	1.33514128E8	MS/MS	STY:79.9663@DKS(0.9377)PVREPIDNLT(0.0623)PEER;
DLDEDELLGNLSETELK	DLDEDELLGNLS[79.9663]ETELK	K	Q	14	30	17	2	12S(79.9663)	sp|Q9NYL9|TMOD3_HUMAN	Q9NYL9	TMOD3_HUMAN	TMOD3	Tropomodulin-3			1	0	MS/MS	STY:79.9663@DLDEDELLGNLS(0.9274)ET(0.0726)ELK;
DLDEEGSEK	DLDEEGS[79.9663]EK	K	E	573	581	9	2	7S(79.9663)	sp|O43719|HTSF1_HUMAN	O43719	HTSF1_HUMAN	HTATSF1	HIV Tat-specific factor 1			2	2.3118196E7	MS/MS	STY:79.9663@DLDEEGS(1.0000)EK;
DLESCSDDDNQGSK	DLESC[57.0215]SDDDNQGS[79.9663]K	K	S	130	143	14	2	13S(79.9663),5C(57.0215)	sp|Q5T3I0-3|GPTC4_HUMAN	Q5T3I0-3	GPTC4_HUMAN	GPATCH4	Isoform 3 of G patch domain-containing protein 4		sp|Q5T3I0|GPTC4_HUMAN	1	0	MS/MS	STY:79.9663@DLES(0.0856)CS(0.0856)DDDNQGS(0.8287)K;
DLESCSDDDNQGSK	DLESC[57.0215]S[79.9663]DDDNQGSK	K	S	130	143	14	2	5C(57.0215),6S(79.9663)	sp|Q5T3I0-3|GPTC4_HUMAN	Q5T3I0-3	GPTC4_HUMAN	GPATCH4	Isoform 3 of G patch domain-containing protein 4		sp|Q5T3I0|GPTC4_HUMAN	1	0	MS/MS	STY:79.9663@DLES(0.0757)CS(0.7329)DDDNQGS(0.1914)K;
DLESCSDDDNQGSK	DLES[79.9663]C[57.0215]S[79.9663]DDDNQGSK	K	S	130	143	14	2	4S(79.9663),5C(57.0215),6S(79.9663)	sp|Q5T3I0-3|GPTC4_HUMAN	Q5T3I0-3	GPTC4_HUMAN	GPATCH4	Isoform 3 of G patch domain-containing protein 4		sp|Q5T3I0|GPTC4_HUMAN	2	0	MS/MS	STY:79.9663@DLES(0.7963)CS(0.7963)DDDNQGS(0.4075)K;
DLFDLNSSEEDDTEGFSER	DLFDLNS[79.9663]S[79.9663]EEDDTEGFSER	K	G	666	684	19	2,3	7S(79.9663),8S(79.9663)	sp|Q9Y3T9|NOC2L_HUMAN	Q9Y3T9	NOC2L_HUMAN	NOC2L	Nucleolar complex protein 2 homolog			9	2.4880842E7	MS/MS	STY:79.9663@DLFDLNS(0.8995)S(0.8995)EEDDT(0.1122)EGFS(0.0888)ER;
DLFDYSPPLHK	DLFDYS[79.9663]PPLHK	K	N	505	515	11	2	6S(79.9663)	sp|Q9NYF8-2|BCLF1_HUMAN	Q9NYF8-2	BCLF1_HUMAN	BCLAF1	Isoform 2 of Bcl-2-associated transcription factor 1		sp|Q9NYF8-3|BCLF1_HUMAN, sp|Q9NYF8|BCLF1_HUMAN	1	0	MS/MS	STY:79.9663@DLFDY(0.1551)S(0.8449)PPLHK;
DLFDYSPPLHK	DLFDY[79.9663]SPPLHK	K	N	505	515	11	2,3	5Y(79.9663)	sp|Q9NYF8-2|BCLF1_HUMAN	Q9NYF8-2	BCLF1_HUMAN	BCLAF1	Isoform 2 of Bcl-2-associated transcription factor 1		sp|Q9NYF8-3|BCLF1_HUMAN, sp|Q9NYF8|BCLF1_HUMAN	8	8.4977256E7	MS/MS	STY:79.9663@DLFDY(0.9289)S(0.0711)PPLHK;
DLGASSLHVNGESLEMDSDEDDSEELEEDDGHGAEQAAAFPTEDSR	DLGASSLHVNGESLEMDS[79.9663]DEDDS[79.9663]EELEEDDGHGAEQAAAFPTEDSR	K	T	331	376	46	4	18S(79.9663),23S(79.9663)	sp|Q9H9B1-3|EHMT1_HUMAN	Q9H9B1-3	EHMT1_HUMAN	EHMT1	Isoform 3 of Histone-lysine N-methyltransferase EHMT1		sp|Q9H9B1-4|EHMT1_HUMAN, sp|Q9H9B1|EHMT1_HUMAN	1	8441459	MS/MS	STY:79.9663@DLGAS(0.1627)S(0.1627)LHVNGES(0.0578)LEMDS(0.6812)DEDDS(0.6772)EELEEDDGHGAEQAAAFPT(0.1293)EDS(0.1293)R;
DLGHPVEEEDELESGDQEDEDDESEDPGK	DLGHPVEEEDELESGDQEDEDDES[79.9663]EDPGK	K	D	940	968	29	3	24S(79.9663)	sp|O60763-2|USO1_HUMAN	O60763-2	USO1_HUMAN	USO1	Isoform 2 of General vesicular transport factor p115		sp|O60763|USO1_HUMAN	1	2.746038E7	MS/MS	STY:79.9663@DLGHPVEEEDELES(0.4964)GDQEDEDDES(0.5036)EDPGK;
DLGHPVEEEDELESGDQEDEDDESEDPGK	DLGHPVEEEDELES[79.9663]GDQEDEDDESEDPGK	K	D	940	968	29	3	14S(79.9663)	sp|O60763-2|USO1_HUMAN	O60763-2	USO1_HUMAN	USO1	Isoform 2 of General vesicular transport factor p115		sp|O60763|USO1_HUMAN	5	2.746038E7	MS/MS	STY:79.9663@DLGHPVEEEDELES(0.6490)GDQEDEDDES(0.3510)EDPGK;
DLGSTEDGDGTDDFLTDKEDEK	DLGSTEDGDGT[79.9663]DDFLTDKEDEK	K	A	180	201	22	3	11T(79.9663)	sp|Q15527|SURF2_HUMAN	Q15527	SURF2_HUMAN	SURF2	Surfeit locus protein 2			1	1.0669004E7	MS/MS	STY:79.9663@DLGS(0.0811)T(0.0811)EDGDGT(0.4189)DDFLT(0.4189)DKEDEK;
DLGSTEDGDGTDDFLTDKEDEK	DLGS[79.9663]TEDGDGTDDFLTDKEDEK	K	A	180	201	22	3	4S(79.9663)	sp|Q15527|SURF2_HUMAN	Q15527	SURF2_HUMAN	SURF2	Surfeit locus protein 2			1	0	MS/MS	STY:79.9663@DLGS(0.3254)T(0.3254)EDGDGT(0.3254)DDFLT(0.0239)DKEDEK;
DLGSTEDGDGTDDFLTDKEDEK	DLGS[79.9663]TEDGDGTDDFLT[79.9663]DKEDEK	K	A	180	201	22	3	16T(79.9663),4S(79.9663)	sp|Q15527|SURF2_HUMAN	Q15527	SURF2_HUMAN	SURF2	Surfeit locus protein 2			1	8408860	MS/MS	STY:79.9663@DLGS(0.6127)T(0.6127)EDGDGT(0.1093)DDFLT(0.6652)DKEDEK;
DLHSDDNEEESDEVEDNDNDSEMERPVNR	DLHS[79.9663]DDNEEES[79.9663]DEVEDNDNDS[79.9663]EMERPVNR	K	G	409	437	29	3	11S(79.9663),21S(79.9663),4S(79.9663)	sp|P42568|AF9_HUMAN	P42568	AF9_HUMAN	MLLT3	Protein AF-9		sp|P42568-2|AF9_HUMAN	1	0	MS/MS	STY:79.9663@DLHS(1.0000)DDNEEES(1.0000)DEVEDNDNDS(1.0000)EMERPVNR;
DLLHPSPEEEK	DLLHPS[79.9663]PEEEK	K	R	6	16	11	2	6S(79.9663)	sp|P42677|RS27_HUMAN	P42677	RS27_HUMAN	RPS27	Small ribosomal subunit protein eS27			3	6985664	MS/MS	STY:79.9663@DLLHPS(1.0000)PEEEK;
DLNESPVK	DLNES[79.9663]PVK	R	S	303	310	8	2	5S(79.9663)	sp|Q96RL1-4|UIMC1_HUMAN	Q96RL1-4	UIMC1_HUMAN	UIMC1	Isoform 4 of BRCA1-A complex subunit RAP80		sp|Q96RL1-2|UIMC1_HUMAN, sp|Q96RL1-3|UIMC1_HUMAN, sp|Q96RL1|UIMC1_HUMAN	1	0	MS/MS	STY:79.9663@DLNES(1.0000)PVK;
DLPAQRGEESSEEEEK	DLPAQRGEES[79.9663]S[79.9663]EEEEK	R	G	150	165	16	2	10S(79.9663),11S(79.9663)	sp|Q9BW71|HIRP3_HUMAN	Q9BW71	HIRP3_HUMAN	HIRIP3	HIRA-interacting protein 3			2	4.4852664E7	MS/MS	STY:79.9663@DLPAQRGEES(1.0000)S(1.0000)EEEEK;
DLQEQDADAGSERGLSGEEEDDEPDCCNDER	DLQEQDADAGS[79.9663]ERGLS[79.9663]GEEEDDEPDC[57.0215]C[57.0215]NDER	R	Y	117	147	31	3	11S(79.9663),16S(79.9663),26C(57.0215),27C(57.0215)	sp|Q6P158-2|DHX57_HUMAN	Q6P158-2	DHX57_HUMAN	DHX57	Isoform 2 of Putative ATP-dependent RNA helicase DHX57		sp|Q6P158-3|DHX57_HUMAN, sp|Q6P158|DHX57_HUMAN	1	0	MS/MS	STY:79.9663@DLQEQDADAGS(1.0000)ERGLS(1.0000)GEEEDDEPDCCNDER;
DLVQPDKPASPK	DLVQPDKPAS[79.9663]PK	R	F	506	517	12	2	10S(79.9663)	sp|Q6PJT7-2|ZC3HE_HUMAN	Q6PJT7-2	ZC3HE_HUMAN	ZC3H14	Isoform 2 of Zinc finger CCCH domain-containing protein 14		sp|Q6PJT7-5|ZC3HE_HUMAN, sp|Q6PJT7-9|ZC3HE_HUMAN, sp|Q6PJT7|ZC3HE_HUMAN	2	8.10501e+06	MS/MS	STY:79.9663@DLVQPDKPAS(1.0000)PK;
DMSPLSETEMALGK	DMS[79.9663]PLSETEMALGK	K	D	505	518	14	2	3S(79.9663)	sp|P27816-6|MAP4_HUMAN	P27816-6	MAP4_HUMAN	MAP4	Isoform 6 of Microtubule-associated protein 4		sp|P27816-2|MAP4_HUMAN, sp|P27816|MAP4_HUMAN	1	0	MS/MS	STY:79.9663@DMS(0.3333)PLS(0.3333)ET(0.3333)EMALGK;
DMPGGFLFEGLSDDEDDFHPNTR	DM[15.9949]PGGFLFEGLS[79.9663]DDEDDFHPNTR	R	S	219	241	23	3	12S(79.9663),2M(15.9949)	sp|Q96S82|UBL7_HUMAN	Q96S82	UBL7_HUMAN	UBL7	Ubiquitin-like protein 7			1	0	MS/MS	STY:79.9663@DMPGGFLFEGLS(0.7152)DDEDDFHPNT(0.2848)R;M:15.9949@DM(1.0000)PGGFLFEGLSDDEDDFHPNTR;
DNDDDQSDKGTYTIELENPNSEEVEAR	DNDDDQS[79.9663]DKGT[79.9663]YTIELENPNSEEVEAR	K	K	491	517	27	3	11T(79.9663),7S(79.9663)	sp|Q5SW79|CE170_HUMAN	Q5SW79	CE170_HUMAN	CEP170	Centrosomal protein of 170 kDa			1	1.5688281E7	MS/MS	STY:79.9663@DNDDDQS(0.4938)DKGT(0.4938)Y(0.4938)T(0.4938)IELENPNS(0.0247)EEVEAR;
DNPSPEPQLDDIKR	DNPS[79.9663]PEPQLDDIKR	K	E	61	74	14	2	4S(79.9663)	sp|Q96JC9-2|EAF1_HUMAN	Q96JC9-2	EAF1_HUMAN	EAF1	Isoform 2 of ELL-associated factor 1		sp|Q96JC9|EAF1_HUMAN	2	0	MS/MS	STY:79.9663@DNPS(1.0000)PEPQLDDIKR;
DNTFFRESPVGR	DNTFFRES[79.9663]PVGR	R	K	133	144	12	2	8S(79.9663)	sp|Q8NEY8-2|PPHLN_HUMAN	Q8NEY8-2	PPHLN_HUMAN	PPHLN1	Isoform 2 of Periphilin-1		sp|Q8NEY8-3|PPHLN_HUMAN, sp|Q8NEY8-5|PPHLN_HUMAN, sp|Q8NEY8-6|PPHLN_HUMAN, sp|Q8NEY8-8|PPHLN_HUMAN, sp|Q8NEY8-9|PPHLN_HUMAN, sp|Q8NEY8|PPHLN_HUMAN	2	1.2904012E7	MS/MS	STY:79.9663@DNT(0.0733)FFRES(0.9267)PVGR;
DPAQPMSPGEATQSGAR	DPAQPMSPGEATQS[79.9663]GAR	R	P	5	21	17	2	14S(79.9663)	sp|Q9BQG0-2|MBB1A_HUMAN	Q9BQG0-2	MBB1A_HUMAN	MYBBP1A	Isoform 2 of Myb-binding protein 1A		sp|Q9BQG0|MBB1A_HUMAN	1	0	MS/MS	STY:79.9663@DPAQPMS(0.1937)PGEAT(0.2212)QS(0.5851)GAR;
DPAQPMSPGEATQSGAR	DPAQPMS[79.9663]PGEATQSGAR	R	P	5	21	17	2	7S(79.9663)	sp|Q9BQG0-2|MBB1A_HUMAN	Q9BQG0-2	MBB1A_HUMAN	MYBBP1A	Isoform 2 of Myb-binding protein 1A		sp|Q9BQG0|MBB1A_HUMAN	1	2.85663e+06	MS/MS	STY:79.9663@DPAQPMS(0.9347)PGEAT(0.0327)QS(0.0327)GAR;
DPAQPMSPGEATQSGARPADR	DPAQPMS[79.9663]PGEATQSGARPADR	R	Y	5	25	21	3	7S(79.9663)	sp|Q9BQG0-2|MBB1A_HUMAN	Q9BQG0-2	MBB1A_HUMAN	MYBBP1A	Isoform 2 of Myb-binding protein 1A		sp|Q9BQG0|MBB1A_HUMAN	1	1.9415492E7	MS/MS	STY:79.9663@DPAQPMS(0.8983)PGEAT(0.0509)QS(0.0509)GARPADR;
DPSASPGDAGEQAIR	DPS[79.9663]ASPGDAGEQAIR	R	Q	286	300	15	2	3S(79.9663)	sp|P18206-2|VINC_HUMAN	P18206-2	VINC_HUMAN	VCL	Isoform 1 of Vinculin		sp|P18206|VINC_HUMAN	1	0	MS/MS	STY:79.9663@DPS(0.8951)AS(0.1049)PGDAGEQAIR;
DQCCSGKGDMSDEDDENEFFDAPEIITMPENLGHK	DQC[57.0215]C[57.0215]S[79.9663]GKGDMSDEDDENEFFDAPEIITMPENLGHK	K	R	341	375	35	3	3C(57.0215),4C(57.0215),5S(79.9663)	sp|P22059|OSBP1_HUMAN	P22059	OSBP1_HUMAN	OSBP	Oxysterol-binding protein 1			1	0	MS/MS	STY:79.9663@DQCCS(0.3358)GKGDMS(0.3358)DEDDENEFFDAPEIIT(0.3284)MPENLGHK;
DQPDGSSLSPAQSPSQSQPPAASSLR	DQPDGS[79.9663]S[79.9663]LSPAQSPSQSQPPAASSLR	K	E	212	237	26	3	6S(79.9663),7S(79.9663)	sp|Q6WCQ1-2|MPRIP_HUMAN	Q6WCQ1-2	MPRIP_HUMAN	MPRIP	Isoform 2 of Myosin phosphatase Rho-interacting protein		sp|Q6WCQ1-3|MPRIP_HUMAN, sp|Q6WCQ1|MPRIP_HUMAN	1	3.44485e+06	MS/MS	STY:79.9663@DQPDGS(0.3963)S(0.3963)LS(0.3963)PAQS(0.3963)PS(0.0443)QS(0.1358)QPPAAS(0.1358)S(0.0987)LR;
DQPPFGDSDDSVEADK	DQPPFGDS[79.9663]DDS[79.9663]VEADK	K	S	488	503	16	2	11S(79.9663),8S(79.9663)	sp|Q14676-3|MDC1_HUMAN	Q14676-3	MDC1_HUMAN	MDC1	Isoform 3 of Mediator of DNA damage checkpoint protein 1		sp|Q14676-2|MDC1_HUMAN, sp|Q14676-4|MDC1_HUMAN, sp|Q14676|MDC1_HUMAN	2	1.4304735E7	MS/MS	STY:79.9663@DQPPFGDS(1.0000)DDS(1.0000)VEADK;
DQPPFGDSDDSVEADKSSPGIHLER	DQPPFGDS[79.9663]DDS[79.9663]VEADKS[79.9663]SPGIHLER	K	S	488	512	25	3	11S(79.9663),17S(79.9663),8S(79.9663)	sp|Q14676-3|MDC1_HUMAN	Q14676-3	MDC1_HUMAN	MDC1	Isoform 3 of Mediator of DNA damage checkpoint protein 1		sp|Q14676-2|MDC1_HUMAN, sp|Q14676-4|MDC1_HUMAN, sp|Q14676|MDC1_HUMAN	1	2.0556122E7	MS/MS	STY:79.9663@DQPPFGDS(0.7609)DDS(0.7609)VEADKS(0.7391)S(0.7391)PGIHLER;
DQQPSGSEGEDDDAEAALK	DQQPS[79.9663]GS[79.9663]EGEDDDAEAALK	K	K	82	100	19	2	5S(79.9663),7S(79.9663)	sp|Q9NXG2|THUM1_HUMAN	Q9NXG2	THUM1_HUMAN	THUMPD1	THUMP domain-containing protein 1			6	7.3963648E7	MS/MS	STY:79.9663@DQQPS(1.0000)GS(1.0000)EGEDDDAEAALK;
DQQPSGSEGEDDDAEAALKK	DQQPS[79.9663]GS[79.9663]EGEDDDAEAALKK	K	E	82	101	20	2,3	5S(79.9663),7S(79.9663)	sp|Q9NXG2|THUM1_HUMAN	Q9NXG2	THUM1_HUMAN	THUMPD1	THUMP domain-containing protein 1			8	8.7827864E7	MS/MS	STY:79.9663@DQQPS(1.0000)GS(1.0000)EGEDDDAEAALKK;
DQSPFSK	DQS[79.9663]PFSK	R	I	685	691	7	2	3S(79.9663)	sp|Q13427|PPIG_HUMAN	Q13427	PPIG_HUMAN	PPIG	Peptidyl-prolyl cis-trans isomerase G			1	3634694	MS/MS	STY:79.9663@DQS(0.9416)PFS(0.0584)K;
DQSPPPSPPPSYHPPPPPTK	DQS[79.9663]PPPS[79.9663]PPPSYHPPPPPTK	K	K	726	745	20	3	3S(79.9663),7S(79.9663)	sp|Q9P206-2|K1522_HUMAN	Q9P206-2	K1522_HUMAN	KIAA1522	Isoform 2 of Uncharacterized protein KIAA1522		sp|Q9P206-3|K1522_HUMAN, sp|Q9P206|K1522_HUMAN	6	1.7813914E7	MS/MS	STY:79.9663@DQS(0.9355)PPPS(0.9355)PPPS(0.0434)Y(0.0434)HPPPPPT(0.0422)K;
DQSPSRAPGLR	DQS[79.9663]PSRAPGLR	K	Q	227	237	11	2	3S(79.9663)	sp|P09601|HMOX1_HUMAN	P09601	HMOX1_HUMAN	HMOX1	Heme oxygenase 1			1	2.2731724E7	MS/MS	STY:79.9663@DQS(0.8989)PS(0.1011)RAPGLR;
DRASPAAAEEVVPEWASCLK	DRAS[79.9663]PAAAEEVVPEWASC[57.0215]LK	R	S	438	457	20	3	18C(57.0215),4S(79.9663)	sp|Q8N3V7-2|SYNPO_HUMAN	Q8N3V7-2	SYNPO_HUMAN	SYNPO	Isoform 2 of Synaptopodin		sp|Q8N3V7-3|SYNPO_HUMAN, sp|Q8N3V7|SYNPO_HUMAN	2	0	MS/MS	STY:79.9663@DRAS(0.9398)PAAAEEVVPEWAS(0.0602)CLK;
DREDSPERCSDSDEEK	DREDS[79.9663]PERC[57.0215]S[79.9663]DSDEEK	K	K	205	220	16	3	10S(79.9663),5S(79.9663),9C(57.0215)	sp|Q14677-2|EPN4_HUMAN	Q14677-2	EPN4_HUMAN	CLINT1	Isoform 2 of Clathrin interactor 1		sp|Q14677-3|EPN4_HUMAN, sp|Q14677|EPN4_HUMAN	1	0	MS/MS	STY:79.9663@DREDS(0.6837)PERCS(0.6581)DS(0.6581)DEEK;
DRPVGGSPGGPR	DRPVGGS[79.9663]PGGPR	R	L	129	140	12	2	7S(79.9663)	sp|Q8NHG8|ZNRF2_HUMAN	Q8NHG8	ZNRF2_HUMAN	ZNRF2	E3 ubiquitin-protein ligase ZNRF2			1	0	MS/MS	STY:79.9663@DRPVGGS(1.0000)PGGPR;
DRQSPPPAK	DRQS[79.9663]PPPAK	K	R	839	847	9	2	4S(79.9663)	sp|Q86VM9|ZCH18_HUMAN	Q86VM9	ZCH18_HUMAN	ZC3H18	Zinc finger CCCH domain-containing protein 18			1	8143567	MS/MS	STY:79.9663@DRQS(1.0000)PPPAK;
DRSSPPPGYIPDELHQVAR	DRSSPPPGY[79.9663]IPDELHQVAR	R	N	161	179	19	3	9Y(79.9663)	sp|Q9Y2U5|M3K2_HUMAN	Q9Y2U5	M3K2_HUMAN	MAP3K2	Mitogen-activated protein kinase kinase kinase 2			1	0	MS/MS	STY:79.9663@DRS(0.1695)S(0.1695)PPPGY(0.6611)IPDELHQVAR;
DRSSPPPGYIPDELHQVAR	DRSS[79.9663]PPPGYIPDELHQVAR	R	N	161	179	19	3	4S(79.9663)	sp|Q9Y2U5|M3K2_HUMAN	Q9Y2U5	M3K2_HUMAN	MAP3K2	Mitogen-activated protein kinase kinase kinase 2			1	7075770	MS/MS	STY:79.9663@DRS(0.1110)S(0.6663)PPPGY(0.2227)IPDELHQVAR;
DRSPIRGSPR	DRS[79.9663]PIRGS[79.9663]PR	R	R	27	36	10	2	3S(79.9663),8S(79.9663)	sp|Q9HCD5|NCOA5_HUMAN	Q9HCD5	NCOA5_HUMAN	NCOA5	Nuclear receptor coactivator 5			2	7.7575768E7	MS/MS	STY:79.9663@DRS(1.0000)PIRGS(1.0000)PR;
DRSSPPPGYIPDELHQVAR	DRS[79.9663]SPPPGYIPDELHQVAR	R	N	161	179	19	3	3S(79.9663)	sp|Q9Y2U5|M3K2_HUMAN	Q9Y2U5	M3K2_HUMAN	MAP3K2	Mitogen-activated protein kinase kinase kinase 2			2	7075770	MS/MS	STY:79.9663@DRS(0.3333)S(0.3333)PPPGY(0.3333)IPDELHQVAR;
DRSSSAPNVHINTIEPVNIDDLIR	DRS[79.9663]SSAPNVHINTIEPVNIDDLIR	R	D	361	384	24	3	3S(79.9663)	sp|P15056|BRAF_HUMAN	P15056	BRAF_HUMAN	BRAF	Serine/threonine-protein kinase B-raf			1	0	MS/MS	STY:79.9663@DRS(0.3125)S(0.3125)S(0.3125)APNVHINT(0.0625)IEPVNIDDLIR;
DRTPPLLYR	DRT[79.9663]PPLLYR	R	D	566	574	9	2	3T(79.9663)	sp|Q96T37-2|RBM15_HUMAN	Q96T37-2	RBM15_HUMAN	RBM15	Isoform 2 of RNA-binding protein 15		sp|Q96T37-3|RBM15_HUMAN, sp|Q96T37-4|RBM15_HUMAN, sp|Q96T37|RBM15_HUMAN	1	8325549	MS/MS	STY:79.9663@DRT(0.9410)PPLLY(0.0590)R;
DSAIPVESDTDDEGAPR	DSAIPVES[79.9663]DTDDEGAPR	R	I	461	477	17	2	8S(79.9663)	sp|Q96D46|NMD3_HUMAN	Q96D46	NMD3_HUMAN	NMD3	60S ribosomal export protein NMD3			1	0	MS/MS	STY:79.9663@DS(0.0225)AIPVES(0.4887)DT(0.4887)DDEGAPR;
DSAPELNVSSSETEEDKEEAKPDGEK	DSAPELNVS[79.9663]S[79.9663]SETEEDKEEAKPDGEK	K	D	878	903	26	3	10S(79.9663),9S(79.9663)	sp|Q86UV5-2|UBP48_HUMAN	Q86UV5-2	UBP48_HUMAN	USP48	Isoform 2 of Ubiquitin carboxyl-terminal hydrolase 48		sp|Q86UV5-5|UBP48_HUMAN, sp|Q86UV5-6|UBP48_HUMAN, sp|Q86UV5-8|UBP48_HUMAN, sp|Q86UV5|UBP48_HUMAN	1	1.5711341E7	MS/MS	STY:79.9663@DS(0.0392)APELNVS(0.4902)S(0.4902)S(0.4902)ET(0.4902)EEDKEEAKPDGEK;
DSAPELNVSSSETEEDKEEAKPDGEK	DSAPELNVS[79.9663]S[79.9663]S[79.9663]ETEEDKEEAKPDGEK	K	D	878	903	26	3	10S(79.9663),11S(79.9663),9S(79.9663)	sp|Q86UV5-2|UBP48_HUMAN	Q86UV5-2	UBP48_HUMAN	USP48	Isoform 2 of Ubiquitin carboxyl-terminal hydrolase 48		sp|Q86UV5-5|UBP48_HUMAN, sp|Q86UV5-6|UBP48_HUMAN, sp|Q86UV5-8|UBP48_HUMAN, sp|Q86UV5|UBP48_HUMAN	1	1.5198034E7	MS/MS	STY:79.9663@DS(0.5965)APELNVS(0.6009)S(0.6009)S(0.6009)ET(0.6009)EEDKEEAKPDGEK;
DSDQVAQSDGEESPAAEEQLLGEHIK	DSDQVAQSDGEES[79.9663]PAAEEQLLGEHIK	K	E	520	545	26	3	13S(79.9663)	sp|O94979-2|SC31A_HUMAN	O94979-2	SC31A_HUMAN	SEC31A	Isoform 2 of Protein transport protein Sec31A		sp|O94979-3|SC31A_HUMAN, sp|O94979-8|SC31A_HUMAN, sp|O94979-9|SC31A_HUMAN, sp|O94979|SC31A_HUMAN	2	2.308048E7	MS/MS	STY:79.9663@DS(0.2094)DQVAQS(0.0394)DGEES(0.7512)PAAEEQLLGEHIK;
DSDQVAQSDGEESPAAEEQLLGEHIK	DSDQVAQS[79.9663]DGEESPAAEEQLLGEHIK	K	E	520	545	26	3	8S(79.9663)	sp|O94979-2|SC31A_HUMAN	O94979-2	SC31A_HUMAN	SEC31A	Isoform 2 of Protein transport protein Sec31A		sp|O94979-3|SC31A_HUMAN, sp|O94979-8|SC31A_HUMAN, sp|O94979-9|SC31A_HUMAN, sp|O94979|SC31A_HUMAN	1	2.308048E7	MS/MS	STY:79.9663@DS(0.0479)DQVAQS(0.9144)DGEES(0.0377)PAAEEQLLGEHIK;
DSENLASPSEYPENGER	DSENLASPS[79.9663]EYPENGER	R	F	600	616	17	2	9S(79.9663)	sp|P52948-2|NUP98_HUMAN	P52948-2	NUP98_HUMAN	NUP98	Isoform 2 of Nuclear pore complex protein Nup98-Nup96		sp|P52948-3|NUP98_HUMAN, sp|P52948-4|NUP98_HUMAN, sp|P52948-5|NUP98_HUMAN, sp|P52948-6|NUP98_HUMAN, sp|P52948|NUP98_HUMAN	1	0	MS/MS	STY:79.9663@DS(0.0816)ENLAS(0.0816)PS(0.4184)EY(0.4184)PENGER;
DSENLASPSEYPENGER	DSENLAS[79.9663]PSEYPENGER	R	F	600	616	17	2	7S(79.9663)	sp|P52948-2|NUP98_HUMAN	P52948-2	NUP98_HUMAN	NUP98	Isoform 2 of Nuclear pore complex protein Nup98-Nup96		sp|P52948-3|NUP98_HUMAN, sp|P52948-4|NUP98_HUMAN, sp|P52948-5|NUP98_HUMAN, sp|P52948-6|NUP98_HUMAN, sp|P52948|NUP98_HUMAN	1	1.2422576E8	MS/MS	STY:79.9663@DS(0.0278)ENLAS(0.9324)PS(0.0200)EY(0.0199)PENGER;
DSGRGDSVSDSGSDALR	DSGRGDS[79.9663]VSDSGSDALR	R	S	59	75	17	2	7S(79.9663)	sp|Q53EL6-2|PDCD4_HUMAN	Q53EL6-2	PDCD4_HUMAN	PDCD4	Isoform 2 of Programmed cell death protein 4		sp|Q53EL6|PDCD4_HUMAN	2	7211881	MS/MS	STY:79.9663@DS(0.0076)GRGDS(0.2481)VS(0.2481)DS(0.2481)GS(0.2481)DALR;
DSGSQVEEDTSCSDSK	DSGS[79.9663]QVEEDTSC[57.0215]SDSK	K	T	687	702	16	2	12C(57.0215),4S(79.9663)	sp|Q08499-6|PDE4D_HUMAN	Q08499-6	PDE4D_HUMAN	PDE4D	Isoform 5 of cAMP-specific 3',5'-cyclic phosphodiesterase 4D		sp|Q08499-10|PDE4D_HUMAN, sp|Q08499-11|PDE4D_HUMAN, sp|Q08499-2|PDE4D_HUMAN, sp|Q08499-3|PDE4D_HUMAN, sp|Q08499-4|PDE4D_HUMAN, sp|Q08499-5|PDE4D_HUMAN, sp|Q08499-8|PDE4D_HUMAN, sp|Q08499-9|PDE4D_HUMAN, sp|Q08499|PDE4D_HUMAN	2	0	MS/MS	STY:79.9663@DS(0.0201)GS(0.9281)QVEEDT(0.0122)S(0.0122)CS(0.0122)DS(0.0151)K;
DSISAVSSEKVSPSK	DSIS[79.9663]AVSSEKVSPSK	K	S	1241	1255	15	2	4S(79.9663)	sp|P46821|MAP1B_HUMAN	P46821	MAP1B_HUMAN	MAP1B	Microtubule-associated protein 1B			1	0	MS/MS	STY:79.9663@DS(0.0929)IS(0.7542)AVS(0.0673)S(0.0285)EKVS(0.0285)PS(0.0285)K;
DSLGDFIEHYAQLGPSSPEQLAAGAEEGGGPR	DSLGDFIEHYAQLGPS[79.9663]SPEQLAAGAEEGGGPR	R	R	85	116	32	3	16S(79.9663)	sp|Q96QR8|PURB_HUMAN	Q96QR8	PURB_HUMAN	PURB	Transcriptional activator protein Pur-beta			1	0	MS/MS	STY:79.9663@DS(0.0719)LGDFIEHY(0.0358)AQLGPS(0.4461)S(0.4461)PEQLAAGAEEGGGPR;
DSQDASAEQSDHDDEVASLASASGGFGTK	DSQDASAEQSDHDDEVASLAS[79.9663]ASGGFGTK	R	V	489	517	29	3	21S(79.9663)	sp|Q6P2E9-2|EDC4_HUMAN	Q6P2E9-2	EDC4_HUMAN	EDC4	Isoform 2 of Enhancer of mRNA-decapping protein 4		sp|Q6P2E9|EDC4_HUMAN	1	6212438	MS/MS	STY:79.9663@DS(0.1400)QDAS(0.1126)AEQS(0.2518)DHDDEVAS(0.0325)LAS(0.4472)AS(0.0069)GGFGT(0.0090)K;
DSQDASAEQSDHDDEVASLASASGGFGTK	DSQDAS[79.9663]AEQSDHDDEVASLASASGGFGTK	R	V	489	517	29	3	6S(79.9663)	sp|Q6P2E9-2|EDC4_HUMAN	Q6P2E9-2	EDC4_HUMAN	EDC4	Isoform 2 of Enhancer of mRNA-decapping protein 4		sp|Q6P2E9|EDC4_HUMAN	1	0	MS/MS	STY:79.9663@DS(0.2097)QDAS(0.3648)AEQS(0.3648)DHDDEVAS(0.0201)LAS(0.0136)AS(0.0136)GGFGT(0.0136)K;
DSSFTEVPRSPK	DSSFTEVPRS[79.9663]PK	R	H	236	247	12	2	10S(79.9663)	sp|O95425-2|SVIL_HUMAN	O95425-2	SVIL_HUMAN	SVIL	Isoform 2 of Supervillin		sp|O95425-3|SVIL_HUMAN, sp|O95425-4|SVIL_HUMAN, sp|O95425|SVIL_HUMAN	1	9757618	MS/MS	STY:79.9663@DS(0.0301)S(0.0301)FT(0.0512)EVPRS(0.8886)PK;
DSSKGEDSAEETEAKPAVVAPAPVVEAVSTPSAAFPSDATAENVK	DSSKGEDSAEET[79.9663]EAKPAVVAPAPVVEAVSTPSAAFPSDATAENVK	R	Q	475	519	45	4	12T(79.9663)	sp|Q12906-7|ILF3_HUMAN	Q12906-7	ILF3_HUMAN	ILF3	Isoform 7 of Interleukin enhancer-binding factor 3		sp|Q12906-4|ILF3_HUMAN, sp|Q12906-6|ILF3_HUMAN	1	0	MS/MS	STY:79.9663@DS(0.0333)S(0.0169)KGEDS(0.0097)AEET(0.8938)EAKPAVVAPAPVVEAVS(0.0094)T(0.0092)PS(0.0092)AAFPS(0.0092)DAT(0.0092)AENVK;
DSSKGEDSAEETEAK	DSSKGEDS[79.9663]AEETEAK	R	P	475	489	15	2	8S(79.9663)	sp|Q12906-7|ILF3_HUMAN	Q12906-7	ILF3_HUMAN	ILF3	Isoform 7 of Interleukin enhancer-binding factor 3		sp|Q12906-2|ILF3_HUMAN, sp|Q12906-3|ILF3_HUMAN, sp|Q12906-4|ILF3_HUMAN, sp|Q12906-5|ILF3_HUMAN, sp|Q12906-6|ILF3_HUMAN, sp|Q12906|ILF3_HUMAN	2	3.3147756E7	MS/MS	STY:79.9663@DS(0.0525)S(0.0525)KGEDS(0.4475)AEET(0.4475)EAK;
DSSKGEDSAEETEAKPAVVAPAPVVEAVSTPSAAFPSDATAENVK	DSSKGEDS[79.9663]AEETEAKPAVVAPAPVVEAVSTPSAAFPSDATAENVK	R	Q	475	519	45	4	8S(79.9663)	sp|Q12906-7|ILF3_HUMAN	Q12906-7	ILF3_HUMAN	ILF3	Isoform 7 of Interleukin enhancer-binding factor 3		sp|Q12906-4|ILF3_HUMAN, sp|Q12906-6|ILF3_HUMAN	1	0	MS/MS	STY:79.9663@DS(0.2702)S(0.2702)KGEDS(0.4268)AEET(0.0063)EAKPAVVAPAPVVEAVS(0.0055)T(0.0055)PS(0.0053)AAFPS(0.0051)DAT(0.0051)AENVK;
DSAIPVESDTDDEGAPR	DS[79.9663]AIPVESDTDDEGAPR	R	I	461	477	17	2	2S(79.9663)	sp|Q96D46|NMD3_HUMAN	Q96D46	NMD3_HUMAN	NMD3	60S ribosomal export protein NMD3			1	0	MS/MS	STY:79.9663@DS(0.4788)AIPVES(0.4788)DT(0.0424)DDEGAPR;
DSAPELNVSSSETEEDKEEAKPDGEK	DS[79.9663]APELNVS[79.9663]S[79.9663]SETEEDKEEAKPDGEK	K	D	878	903	26	3	10S(79.9663),2S(79.9663),9S(79.9663)	sp|Q86UV5-2|UBP48_HUMAN	Q86UV5-2	UBP48_HUMAN	USP48	Isoform 2 of Ubiquitin carboxyl-terminal hydrolase 48		sp|Q86UV5-5|UBP48_HUMAN, sp|Q86UV5-6|UBP48_HUMAN, sp|Q86UV5-8|UBP48_HUMAN, sp|Q86UV5|UBP48_HUMAN	1	1.4791038E7	MS/MS	STY:79.9663@DS(0.6000)APELNVS(0.6000)S(0.6000)S(0.6000)ET(0.6000)EEDKEEAKPDGEK;
DSDQVAQSDGEESPAAEEQLLGEHIK	DS[79.9663]DQVAQSDGEESPAAEEQLLGEHIK	K	E	520	545	26	3	2S(79.9663)	sp|O94979-2|SC31A_HUMAN	O94979-2	SC31A_HUMAN	SEC31A	Isoform 2 of Protein transport protein Sec31A		sp|O94979-3|SC31A_HUMAN, sp|O94979-8|SC31A_HUMAN, sp|O94979-9|SC31A_HUMAN, sp|O94979|SC31A_HUMAN	2	2.308048E7	MS/MS	STY:79.9663@DS(0.3823)DQVAQS(0.3089)DGEES(0.3089)PAAEEQLLGEHIK;
DSDQVAQSDGEESPAAEEQLLGEHIKEEK	DS[79.9663]DQVAQSDGEESPAAEEQLLGEHIKEEK	K	E	520	548	29	3	2S(79.9663)	sp|O94979-2|SC31A_HUMAN	O94979-2	SC31A_HUMAN	SEC31A	Isoform 2 of Protein transport protein Sec31A		sp|O94979-3|SC31A_HUMAN, sp|O94979-8|SC31A_HUMAN, sp|O94979-9|SC31A_HUMAN, sp|O94979|SC31A_HUMAN	1	0	MS/MS	STY:79.9663@DS(0.3333)DQVAQS(0.3333)DGEES(0.3333)PAAEEQLLGEHIKEEK;
DSDQVAQSDGEESPAAEEQLLGEHIK	DS[79.9663]DQVAQSDGEES[79.9663]PAAEEQLLGEHIK	K	E	520	545	26	3	13S(79.9663),2S(79.9663)	sp|O94979-2|SC31A_HUMAN	O94979-2	SC31A_HUMAN	SEC31A	Isoform 2 of Protein transport protein Sec31A		sp|O94979-3|SC31A_HUMAN, sp|O94979-8|SC31A_HUMAN, sp|O94979-9|SC31A_HUMAN, sp|O94979|SC31A_HUMAN	1	5692488	MS/MS	STY:79.9663@DS(0.6570)DQVAQS(0.6570)DGEES(0.6861)PAAEEQLLGEHIK;
DSENLASPSEYPENGER	DS[79.9663]ENLASPSEYPENGER	R	F	600	616	17	2	2S(79.9663)	sp|P52948-2|NUP98_HUMAN	P52948-2	NUP98_HUMAN	NUP98	Isoform 2 of Nuclear pore complex protein Nup98-Nup96		sp|P52948-3|NUP98_HUMAN, sp|P52948-4|NUP98_HUMAN, sp|P52948-5|NUP98_HUMAN, sp|P52948-6|NUP98_HUMAN, sp|P52948|NUP98_HUMAN	2	1.2422576E8	MS/MS	STY:79.9663@DS(0.9079)ENLAS(0.0307)PS(0.0307)EY(0.0307)PENGER;
DSHSSEEDEASSQTDLSQTISK	DS[79.9663]HS[79.9663]SEEDEASSQTDLSQTISK	R	K	153	174	22	3	2S(79.9663),4S(79.9663)	sp|Q5JTV8-2|TOIP1_HUMAN	Q5JTV8-2	TOIP1_HUMAN	TOR1AIP1	Isoform 2 of Torsin-1A-interacting protein 1		sp|Q5JTV8-3|TOIP1_HUMAN, sp|Q5JTV8-4|TOIP1_HUMAN, sp|Q5JTV8|TOIP1_HUMAN	5	1.2578838E7	MS/MS	STY:79.9663@DS(0.6240)HS(0.6240)S(0.6240)EEDEAS(0.0315)S(0.0315)QT(0.0162)DLS(0.0162)QT(0.0162)IS(0.0162)K;
DSNELSDSAGEEDSADLK	DS[79.9663]NELS[79.9663]DSAGEEDSADLK	K	R	710	727	18	2	2S(79.9663),6S(79.9663)	sp|Q9Y6X9-2|MORC2_HUMAN	Q9Y6X9-2	MORC2_HUMAN	MORC2	Isoform 2 of ATPase MORC2		sp|Q9Y6X9|MORC2_HUMAN	1	4380715	MS/MS	STY:79.9663@DS(0.6457)NELS(0.6457)DS(0.6457)AGEEDS(0.0630)ADLK;
DSPDSPEPPNK	DS[79.9663]PDSPEPPNK	K	K	521	531	11	2	2S(79.9663)	sp|Q9NVM9-2|INT13_HUMAN	Q9NVM9-2	INT13_HUMAN	INTS13	Isoform 2 of Integrator complex subunit 13		sp|Q9NVM9|INT13_HUMAN	1	5345656	MS/MS	STY:79.9663@DS(0.5000)PDS(0.5000)PEPPNK;
DSSGSVSPNTLSQEEGDQICLYHIR	DS[79.9663]SGSVSPNTLSQEEGDQIC[57.0215]LYHIR	K	K	257	281	25	3	20C(57.0215),2S(79.9663)	sp|Q9H0J9|PAR12_HUMAN	Q9H0J9	PAR12_HUMAN	PARP12	Protein mono-ADP-ribosyltransferase PARP12			1	3.3215e+06	MS/MS	STY:79.9663@DS(0.1429)S(0.1429)GS(0.1429)VS(0.1429)PNT(0.1429)LS(0.1429)QEEGDQICLY(0.1429)HIR;
DSSKGEDSAEETEAK	DS[79.9663]SKGEDSAEETEAK	R	P	475	489	15	2	2S(79.9663)	sp|Q12906-7|ILF3_HUMAN	Q12906-7	ILF3_HUMAN	ILF3	Isoform 7 of Interleukin enhancer-binding factor 3		sp|Q12906-2|ILF3_HUMAN, sp|Q12906-3|ILF3_HUMAN, sp|Q12906-4|ILF3_HUMAN, sp|Q12906-5|ILF3_HUMAN, sp|Q12906-6|ILF3_HUMAN, sp|Q12906|ILF3_HUMAN	1	0	MS/MS	STY:79.9663@DS(0.4625)S(0.4625)KGEDS(0.0196)AEET(0.0554)EAK;
DTDDIESPKR	DTDDIES[79.9663]PKR	K	S	163	172	10	2	7S(79.9663)	sp|Q9UPQ0-10|LIMC1_HUMAN	Q9UPQ0-10	LIMC1_HUMAN	LIMCH1	Isoform 10 of LIM and calponin homology domains-containing protein 1		sp|Q9UPQ0-2|LIMC1_HUMAN, sp|Q9UPQ0-3|LIMC1_HUMAN, sp|Q9UPQ0-4|LIMC1_HUMAN, sp|Q9UPQ0-5|LIMC1_HUMAN, sp|Q9UPQ0-6|LIMC1_HUMAN, sp|Q9UPQ0-7|LIMC1_HUMAN, sp|Q9UPQ0-8|LIMC1_HUMAN, sp|Q9UPQ0-9|LIMC1_HUMAN, sp|Q9UPQ0|LIMC1_HUMAN	1	3709370	MS/MS	STY:79.9663@DT(0.1990)DDIES(0.8010)PKR;
DTFEHDPSESIDEFNK	DTFEHDPS[79.9663]ESIDEFNK	K	S	187	202	16	2	8S(79.9663)	sp|Q9NYF8-2|BCLF1_HUMAN	Q9NYF8-2	BCLF1_HUMAN	BCLAF1	Isoform 2 of Bcl-2-associated transcription factor 1		sp|Q9NYF8-3|BCLF1_HUMAN, sp|Q9NYF8-4|BCLF1_HUMAN, sp|Q9NYF8|BCLF1_HUMAN	1	0	MS/MS	STY:79.9663@DT(0.0250)FEHDPS(0.4875)ES(0.4875)IDEFNK;
DTHEDHDTSTENTDESNHDPQFEPIVSLPEQEIK	DTHEDHDTSTENTDES[79.9663]NHDPQFEPIVSLPEQEIK	K	T	6	39	34	4	16S(79.9663)	sp|P43487-2|RANG_HUMAN	P43487-2	RANG_HUMAN	RANBP1	Isoform 2 of Ran-specific GTPase-activating protein		sp|P43487|RANG_HUMAN	1	3.3992176E7	MS/MS	STY:79.9663@DT(0.0244)HEDHDT(0.0118)S(0.0129)T(0.0129)ENT(0.0226)DES(0.9014)NHDPQFEPIVS(0.0140)LPEQEIK;
DTHEDHDTSTENTDESNHDPQFEPIVSLPEQEIK	DTHEDHDT[79.9663]STENTDESNHDPQFEPIVSLPEQEIK	K	T	6	39	34	4	8T(79.9663)	sp|P43487-2|RANG_HUMAN	P43487-2	RANG_HUMAN	RANBP1	Isoform 2 of Ran-specific GTPase-activating protein		sp|P43487|RANG_HUMAN	1	3.3992176E7	MS/MS	STY:79.9663@DT(0.2195)HEDHDT(0.2550)S(0.2550)T(0.2550)ENT(0.0057)DES(0.0053)NHDPQFEPIVS(0.0046)LPEQEIK;
DTHEDHDTSTENTDESNHDPQFEPIVSLPEQEIK	DTHEDHDT[79.9663]S[79.9663]TENTDESNHDPQFEPIVSLPEQEIK	K	T	6	39	34	3	8T(79.9663),9S(79.9663)	sp|P43487-2|RANG_HUMAN	P43487-2	RANG_HUMAN	RANBP1	Isoform 2 of Ran-specific GTPase-activating protein		sp|P43487|RANG_HUMAN	1	9230509	MS/MS	STY:79.9663@DT(0.1518)HEDHDT(0.5932)S(0.5932)T(0.5932)ENT(0.0247)DES(0.0220)NHDPQFEPIVS(0.0220)LPEQEIK;
DTSATSQSVNGSPQAEQPSLESTSK	DTSATSQSVNGS[79.9663]PQAEQPSLESTSK	K	E	30	54	25	3	12S(79.9663)	sp|Q86WB0-2|ZC3C1_HUMAN	Q86WB0-2	ZC3C1_HUMAN	ZC3HC1	Isoform 2 of Zinc finger C3HC-type protein 1		sp|Q86WB0-3|ZC3C1_HUMAN, sp|Q86WB0|ZC3C1_HUMAN	2	0	MS/MS	STY:79.9663@DT(0.0159)S(0.0159)AT(0.0159)S(0.0159)QS(0.0159)VNGS(0.5601)PQAEQPS(0.2479)LES(0.0375)T(0.0375)S(0.0375)K;
DTSENADGQSDENKDDYTIPDEYR	DTSENADGQSDENKDDYTIPDEY[79.9663]R	K	I	757	780	24	3	23Y(79.9663)	sp|P43243|MATR3_HUMAN	P43243	MATR3_HUMAN	MATR3	Matrin-3		sp|P43243-2|MATR3_HUMAN	3	3.4464336E7	MS/MS	STY:79.9663@DT(0.0784)S(0.0784)ENADGQS(0.0784)DENKDDY(0.0147)T(0.0147)IPDEY(0.7355)R;
DTSENADGQSDENKDDYTIPDEYR	DTSENADGQS[79.9663]DENKDDYTIPDEYR	K	I	757	780	24	3	10S(79.9663)	sp|P43243|MATR3_HUMAN	P43243	MATR3_HUMAN	MATR3	Matrin-3		sp|P43243-2|MATR3_HUMAN	4	1.11392456E8	MS/MS	STY:79.9663@DT(0.0251)S(0.0251)ENADGQS(0.8939)DENKDDY(0.0153)T(0.0168)IPDEY(0.0238)R;
DTVIIVSEPSEDEESQGLPTMAR	DTVIIVS[79.9663]EPS[79.9663]EDEESQGLPTMAR	K	R	118	140	23	3	10S(79.9663),7S(79.9663)	sp|Q9H4L7-2|SMRCD_HUMAN	Q9H4L7-2	SMRCD_HUMAN	SMARCAD1	Isoform 2 of SWI/SNF-related matrix-associated actin-dependent regulator of chromatin subfamily A containing DEAD/H box 1		sp|Q9H4L7|SMRCD_HUMAN	1	0	MS/MS	STY:79.9663@DT(0.1546)VIIVS(0.7911)EPS(0.7999)EDEES(0.2048)QGLPT(0.0496)MAR;
DTYSDRSGSSSPDSEITELK	DTYSDRSGSS[79.9663]S[79.9663]PDSEITELK	R	F	334	353	20	2	10S(79.9663),11S(79.9663)	sp|P17812-2|PYRG1_HUMAN	P17812-2	PYRG1_HUMAN	CTPS1	Isoform 2 of CTP synthase 1		sp|P17812|PYRG1_HUMAN	1	1.2582183E7	MS/MS	STY:79.9663@DT(0.0228)Y(0.0228)S(0.0232)DRS(0.0235)GS(0.0246)S(0.9211)S(0.9211)PDS(0.0201)EIT(0.0208)ELK;
DTDDIESPKR	DT[79.9663]DDIESPKR	K	S	163	172	10	2	2T(79.9663)	sp|Q9UPQ0-10|LIMC1_HUMAN	Q9UPQ0-10	LIMC1_HUMAN	LIMCH1	Isoform 10 of LIM and calponin homology domains-containing protein 1		sp|Q9UPQ0-2|LIMC1_HUMAN, sp|Q9UPQ0-3|LIMC1_HUMAN, sp|Q9UPQ0-4|LIMC1_HUMAN, sp|Q9UPQ0-5|LIMC1_HUMAN, sp|Q9UPQ0-6|LIMC1_HUMAN, sp|Q9UPQ0-7|LIMC1_HUMAN, sp|Q9UPQ0-8|LIMC1_HUMAN, sp|Q9UPQ0-9|LIMC1_HUMAN, sp|Q9UPQ0|LIMC1_HUMAN	1	3709370	MS/MS	STY:79.9663@DT(0.5000)DDIES(0.5000)PKR;
DTGSEVPSGSGHGPCTPPPAPANFEDVAPTGSGEPGATRESPK	DT[79.9663]GSEVPSGSGHGPC[57.0215]TPPPAPANFEDVAPTGS[79.9663]GEPGATRESPK	R	A	525	567	43	4	15C(57.0215),2T(79.9663),32S(79.9663)	sp|O15047|SET1A_HUMAN	O15047	SET1A_HUMAN	SETD1A	Histone-lysine N-methyltransferase SETD1A			1	0	MS/MS	STY:79.9663@DT(0.3402)GS(0.3402)EVPS(0.3402)GS(0.3402)GHGPCT(0.0398)PPPAPANFEDVAPT(0.0780)GS(0.4303)GEPGAT(0.0455)RES(0.0455)PK;
DTHEDHDTSTENTDESNHDPQFEPIVSLPEQEIK	DT[79.9663]HEDHDTSTENTDESNHDPQFEPIVSLPEQEIK	K	T	6	39	34	4	2T(79.9663)	sp|P43487-2|RANG_HUMAN	P43487-2	RANG_HUMAN	RANBP1	Isoform 2 of Ran-specific GTPase-activating protein		sp|P43487|RANG_HUMAN	1	0	MS/MS	STY:79.9663@DT(0.4435)HEDHDT(0.0198)S(0.0198)T(0.0198)ENT(0.1812)DES(0.0591)NHDPQFEPIVS(0.2567)LPEQEIK;
DTSENADGQSDENKDDYTIPDEYR	DT[79.9663]SENADGQSDENKDDYTIPDEYR	K	I	757	780	24	3	2T(79.9663)	sp|P43243|MATR3_HUMAN	P43243	MATR3_HUMAN	MATR3	Matrin-3		sp|P43243-2|MATR3_HUMAN	3	3.98828e+06	MS/MS	STY:79.9663@DT(0.4566)S(0.4566)ENADGQS(0.0260)DENKDDY(0.0260)T(0.0260)IPDEY(0.0090)R;
DTYSDRSGSSSPDSEITELK	DT[79.9663]Y[79.9663]SDRSGSSSPDSEITELK	R	F	334	353	20	3	2T(79.9663),3Y(79.9663)	sp|P17812-2|PYRG1_HUMAN	P17812-2	PYRG1_HUMAN	CTPS1	Isoform 2 of CTP synthase 1		sp|P17812|PYRG1_HUMAN	3	8059409	MS/MS	STY:79.9663@DT(0.4452)Y(0.4452)S(0.4452)DRS(0.4452)GS(0.0654)S(0.0654)S(0.0489)PDS(0.0197)EIT(0.0197)ELK;
DTYSDRSGSSSPDSEITELK	DT[79.9663]Y[79.9663]S[79.9663]DRSGSSSPDSEITELK	R	F	334	353	20	3	2T(79.9663),3Y(79.9663),4S(79.9663)	sp|P17812-2|PYRG1_HUMAN	P17812-2	PYRG1_HUMAN	CTPS1	Isoform 2 of CTP synthase 1		sp|P17812|PYRG1_HUMAN	3	1.061788E7	MS/MS	STY:79.9663@DT(0.5405)Y(0.5405)S(0.5405)DRS(0.5405)GS(0.5405)S(0.0743)S(0.0743)PDS(0.0743)EIT(0.0743)ELK;
DVAGATWGNGSGEEEEEEDGPAVLVEQQTDSAMEPTGPTQER	DVAGATWGNGS[79.9663]GEEEEEEDGPAVLVEQQTDSAMEPTGPTQER	R	Y	314	355	42	3	11S(79.9663)	sp|P36915|GNL1_HUMAN	P36915	GNL1_HUMAN	GNL1	Guanine nucleotide-binding protein-like 1		sp|P36915-2|GNL1_HUMAN	2	3.086403E7	MS/MS	STY:79.9663@DVAGAT(0.0979)WGNGS(0.7883)GEEEEEEDGPAVLVEQQT(0.0419)DS(0.0419)AMEPT(0.0154)GPT(0.0144)QER;
DVAGATWGNGSGEEEEEEDGPAVLVEQQTDSAMEPTGPTQER	DVAGAT[79.9663]WGNGSGEEEEEEDGPAVLVEQQTDSAMEPTGPTQER	R	Y	314	355	42	3	6T(79.9663)	sp|P36915|GNL1_HUMAN	P36915	GNL1_HUMAN	GNL1	Guanine nucleotide-binding protein-like 1		sp|P36915-2|GNL1_HUMAN	2	0	MS/MS	STY:79.9663@DVAGAT(0.4747)WGNGS(0.4747)GEEEEEEDGPAVLVEQQT(0.0140)DS(0.0140)AMEPT(0.0102)GPT(0.0125)QER;
DVDDGSGSPHSPHQLSSK	DVDDGSGS[79.9663]PHS[79.9663]PHQLSSK	R	S	1775	1792	18	2	11S(79.9663),8S(79.9663)	sp|Q9H4A3-2|WNK1_HUMAN	Q9H4A3-2	WNK1_HUMAN	WNK1	Isoform 2 of Serine/threonine-protein kinase WNK1		sp|Q9H4A3-4|WNK1_HUMAN, sp|Q9H4A3-5|WNK1_HUMAN, sp|Q9H4A3-6|WNK1_HUMAN, sp|Q9H4A3-7|WNK1_HUMAN, sp|Q9H4A3|WNK1_HUMAN	1	7.18376e+06	MS/MS	STY:79.9663@DVDDGS(0.2690)GS(0.6845)PHS(0.6845)PHQLS(0.1810)S(0.1810)K;
DVDDGSGSPHSPHQLSSK	DVDDGS[79.9663]GS[79.9663]PHSPHQLSSK	R	S	1775	1792	18	2	6S(79.9663),8S(79.9663)	sp|Q9H4A3-2|WNK1_HUMAN	Q9H4A3-2	WNK1_HUMAN	WNK1	Isoform 2 of Serine/threonine-protein kinase WNK1		sp|Q9H4A3-4|WNK1_HUMAN, sp|Q9H4A3-5|WNK1_HUMAN, sp|Q9H4A3-6|WNK1_HUMAN, sp|Q9H4A3-7|WNK1_HUMAN, sp|Q9H4A3|WNK1_HUMAN	1	7.18376e+06	MS/MS	STY:79.9663@DVDDGS(0.4221)GS(0.4221)PHS(0.4221)PHQLS(0.4221)S(0.3117)K;
DVDDGSGSPHSPHQLSSK	DVDDGS[79.9663]GS[79.9663]PHS[79.9663]PHQLSSK	R	S	1775	1792	18	2	11S(79.9663),6S(79.9663),8S(79.9663)	sp|Q9H4A3-2|WNK1_HUMAN	Q9H4A3-2	WNK1_HUMAN	WNK1	Isoform 2 of Serine/threonine-protein kinase WNK1		sp|Q9H4A3-4|WNK1_HUMAN, sp|Q9H4A3-5|WNK1_HUMAN, sp|Q9H4A3-6|WNK1_HUMAN, sp|Q9H4A3-7|WNK1_HUMAN, sp|Q9H4A3|WNK1_HUMAN	2	8793556	MS/MS	STY:79.9663@DVDDGS(0.8707)GS(0.8707)PHS(0.8722)PHQLS(0.2086)S(0.1779)K;
DVMSDETNNEETESPSQEFVNITK	DVMSDETNNEET[79.9663]ESPSQEFVNITK	R	Y	1141	1164	24	3	12T(79.9663)	sp|P46821|MAP1B_HUMAN	P46821	MAP1B_HUMAN	MAP1B	Microtubule-associated protein 1B			1	0	MS/MS	STY:79.9663@DVMS(0.0591)DET(0.0269)NNEET(0.4432)ES(0.4432)PS(0.0117)QEFVNIT(0.0160)K;
DVTPPPETEVVLIK	DVT[79.9663]PPPETEVVLIK	K	N	519	532	14	2	3T(79.9663)	sp|P27816-6|MAP4_HUMAN	P27816-6	MAP4_HUMAN	MAP4	Isoform 6 of Microtubule-associated protein 4		sp|P27816-2|MAP4_HUMAN, sp|P27816|MAP4_HUMAN	3	1.9306142E7	MS/MS	STY:79.9663@DVT(0.9313)PPPET(0.0687)EVVLIK;
DVYLSPRDDGYSTK	DVYLSPRDDGYS[79.9663]TK	R	D	191	204	14	2	12S(79.9663)	sp|P38159-2|RBMX_HUMAN	P38159-2	RBMX_HUMAN	RBMX	Isoform 2 of RNA-binding motif protein, X chromosome	RBMXL1	sp|P38159|RBMX_HUMAN, sp|Q96E39|RMXL1_HUMAN	1	3.5430088E7	MS/MS	STY:79.9663@DVY(0.1257)LS(0.1433)PRDDGY(0.2217)S(0.2547)T(0.2547)K;
DVYLSPRDDGYSTK	DVYLSPRDDGY[79.9663]STK	R	D	191	204	14	2,3	11Y(79.9663)	sp|P38159-2|RBMX_HUMAN	P38159-2	RBMX_HUMAN	RBMX	Isoform 2 of RNA-binding motif protein, X chromosome	RBMXL1	sp|P38159|RBMX_HUMAN, sp|Q96E39|RMXL1_HUMAN	3	8.7831704E7	MS/MS	STY:79.9663@DVY(0.0444)LS(0.0444)PRDDGY(0.8620)S(0.0246)T(0.0246)K;
DVYLSPR	DVYLS[79.9663]PR	R	D	191	197	7	2	5S(79.9663)	sp|P38159-2|RBMX_HUMAN	P38159-2	RBMX_HUMAN	RBMX	Isoform 2 of RNA-binding motif protein, X chromosome	RBMXL1	sp|P38159|RBMX_HUMAN, sp|Q96E39|RMXL1_HUMAN	1	5593663	MS/MS	STY:79.9663@DVY(0.0591)LS(0.9409)PR;
DVYLSPRDDGYSTK	DVYLS[79.9663]PRDDGYSTK	R	D	191	204	14	2	5S(79.9663)	sp|P38159-2|RBMX_HUMAN	P38159-2	RBMX_HUMAN	RBMX	Isoform 2 of RNA-binding motif protein, X chromosome	RBMXL1	sp|P38159|RBMX_HUMAN, sp|Q96E39|RMXL1_HUMAN	2	4.8165968E7	MS/MS	STY:79.9663@DVY(0.0303)LS(0.8886)PRDDGY(0.0270)S(0.0270)T(0.0270)K;
DVYLSPR	DVY[79.9663]LSPR	R	D	191	197	7	2	3Y(79.9663)	sp|P38159-2|RBMX_HUMAN	P38159-2	RBMX_HUMAN	RBMX	Isoform 2 of RNA-binding motif protein, X chromosome	RBMXL1	sp|P38159|RBMX_HUMAN, sp|Q96E39|RMXL1_HUMAN	2	1.67692e+06	MS/MS	STY:79.9663@DVY(0.5000)LS(0.5000)PR;
DVYLSPRDDGYSTK	DVY[79.9663]LSPRDDGYSTK	R	D	191	204	14	2	3Y(79.9663)	sp|P38159-2|RBMX_HUMAN	P38159-2	RBMX_HUMAN	RBMX	Isoform 2 of RNA-binding motif protein, X chromosome	RBMXL1	sp|P38159|RBMX_HUMAN, sp|Q96E39|RMXL1_HUMAN	5	8.3596056E7	MS/MS	STY:79.9663@DVY(0.7890)LS(0.1304)PRDDGY(0.0269)S(0.0269)T(0.0269)K;
DWEDDSDEDMSNFDR	DWEDDSDEDMS[79.9663]NFDR	K	F	108	122	15	2	11S(79.9663)	sp|Q15185|TEBP_HUMAN	Q15185	TEBP_HUMAN	PTGES3	Prostaglandin E synthase 3		sp|Q15185-2|TEBP_HUMAN, sp|Q15185-4|TEBP_HUMAN	2	5.8626694E8	MS/MS	STY:79.9663@DWEDDS(0.4801)DEDMS(0.5199)NFDR;
DWEDDSDEDMSNFDR	DWEDDSDEDM[15.9949]S[79.9663]NFDR	K	F	108	122	15	2	10M(15.9949),11S(79.9663)	sp|Q15185|TEBP_HUMAN	Q15185	TEBP_HUMAN	PTGES3	Prostaglandin E synthase 3		sp|Q15185-2|TEBP_HUMAN, sp|Q15185-4|TEBP_HUMAN	1	1.32355936E8	MS/MS	STY:79.9663@DWEDDS(0.1082)DEDMS(0.8918)NFDR;M:15.9949@DWEDDSDEDM(1.0000)SNFDR;
DWEDDSDEDMSNFDR	DWEDDS[79.9663]DEDMSNFDR	K	F	108	122	15	2	6S(79.9663)	sp|Q15185|TEBP_HUMAN	Q15185	TEBP_HUMAN	PTGES3	Prostaglandin E synthase 3		sp|Q15185-2|TEBP_HUMAN, sp|Q15185-4|TEBP_HUMAN	13	5.8626694E8	MS/MS	STY:79.9663@DWEDDS(0.9425)DEDMS(0.0575)NFDR;
DWEDDSDEDMSNFDR	DWEDDS[79.9663]DEDM[15.9949]SNFDR	K	F	108	122	15	2	10M(15.9949),6S(79.9663)	sp|Q15185|TEBP_HUMAN	Q15185	TEBP_HUMAN	PTGES3	Prostaglandin E synthase 3		sp|Q15185-2|TEBP_HUMAN, sp|Q15185-4|TEBP_HUMAN	5	1.32355936E8	MS/MS	STY:79.9663@DWEDDS(0.8885)DEDMS(0.1115)NFDR;M:15.9949@DWEDDSDEDM(1.0000)SNFDR;
DYDDMSPR	DYDDMS[79.9663]PR	R	R	279	286	8	2	6S(79.9663)	sp|P61978-2|HNRPK_HUMAN	P61978-2	HNRPK_HUMAN	HNRNPK	Isoform 2 of Heterogeneous nuclear ribonucleoprotein K		sp|P61978-3|HNRPK_HUMAN, sp|P61978|HNRPK_HUMAN	5	7.103896E7	MS/MS	STY:79.9663@DY(0.0581)DDMS(0.9419)PR;
DYDDMSPR	DYDDM[15.9949]S[79.9663]PR	R	R	279	286	8	2	5M(15.9949),6S(79.9663)	sp|P61978-2|HNRPK_HUMAN	P61978-2	HNRPK_HUMAN	HNRNPK	Isoform 2 of Heterogeneous nuclear ribonucleoprotein K		sp|P61978-3|HNRPK_HUMAN, sp|P61978|HNRPK_HUMAN	1	6774438	MS/MS	STY:79.9663@DY(0.1134)DDMS(0.8866)PR;M:15.9949@DYDDM(1.0000)SPR;
DYDEEEQGYDSEK	DYDEEEQGYDS[79.9663]EK	R	E	423	435	13	2	11S(79.9663)	sp|Q05519-2|SRS11_HUMAN	Q05519-2	SRS11_HUMAN	SRSF11	Isoform 2 of Serine/arginine-rich splicing factor 11		sp|Q05519|SRS11_HUMAN	2	2.8140962E7	MS/MS	STY:79.9663@DY(0.0297)DEEEQGY(0.0344)DS(0.9359)EK;
DYDEEEQGYDSEK	DYDEEEQGY[79.9663]DSEK	R	E	423	435	13	2	9Y(79.9663)	sp|Q05519-2|SRS11_HUMAN	Q05519-2	SRS11_HUMAN	SRSF11	Isoform 2 of Serine/arginine-rich splicing factor 11		sp|Q05519|SRS11_HUMAN	1	2.8140962E7	MS/MS	STY:79.9663@DY(0.0214)DEEEQGY(0.4893)DS(0.4893)EK;
DYEEVGADSADGEDEGEEY	DYEEVGADS[79.9663]ADGEDEGEEY	K	-	431	449	19	2	9S(79.9663)	sp|Q9BQE3|TBA1C_HUMAN	Q9BQE3	TBA1C_HUMAN	TUBA1C	Tubulin alpha-1C chain			1	1.6451107E7	MS/MS	STY:79.9663@DY(0.1469)EEVGADS(0.8240)ADGEDEGEEY(0.0291);
DYLLSESEDEGDNDGERK	DYLLS[79.9663]ES[79.9663]EDEGDNDGERK	K	H	25	42	18	2	5S(79.9663),7S(79.9663)	sp|Q9BVJ6-3|UT14A_HUMAN	Q9BVJ6-3	UT14A_HUMAN	UTP14A	Isoform 3 of U3 small nucleolar RNA-associated protein 14 homolog A		sp|Q9BVJ6|UT14A_HUMAN	2	3.1031592E7	MS/MS	STY:79.9663@DY(0.1835)LLS(0.9083)ES(0.9083)EDEGDNDGERK;
DYNASASTISPPSSMEEDK	DYNASASTISPPS[79.9663]SMEEDK	K	F	1199	1217	19	2	13S(79.9663)	sp|P46821|MAP1B_HUMAN	P46821	MAP1B_HUMAN	MAP1B	Microtubule-associated protein 1B			1	5446790	MS/MS	STY:79.9663@DY(0.0178)NAS(0.0178)AS(0.0693)T(0.0693)IS(0.0693)PPS(0.3783)S(0.3783)MEEDK;
DYDDMSPR	DY[79.9663]DDMSPR	R	R	279	286	8	2	2Y(79.9663)	sp|P61978-2|HNRPK_HUMAN	P61978-2	HNRPK_HUMAN	HNRNPK	Isoform 2 of Heterogeneous nuclear ribonucleoprotein K		sp|P61978-3|HNRPK_HUMAN, sp|P61978|HNRPK_HUMAN	1	0	MS/MS	STY:79.9663@DY(0.5000)DDMS(0.5000)PR;
DYDEEEQGYDSEK	DY[79.9663]DEEEQGYDSEK	R	E	423	435	13	2	2Y(79.9663)	sp|Q05519-2|SRS11_HUMAN	Q05519-2	SRS11_HUMAN	SRSF11	Isoform 2 of Serine/arginine-rich splicing factor 11		sp|Q05519|SRS11_HUMAN	1	2.8140962E7	MS/MS	STY:79.9663@DY(0.3333)DEEEQGY(0.3333)DS(0.3333)EK;
DYEEVGADSADGEDEGEEY	DY[79.9663]EEVGADSADGEDEGEEY	K	-	431	449	19	2	2Y(79.9663)	sp|Q9BQE3|TBA1C_HUMAN	Q9BQE3	TBA1C_HUMAN	TUBA1C	Tubulin alpha-1C chain			1	1.6451107E7	MS/MS	STY:79.9663@DY(0.4890)EEVGADS(0.4890)ADGEDEGEEY(0.0220);
DYLLSESEDEGDNDGERK	DY[79.9663]LLSES[79.9663]EDEGDNDGERK	K	H	25	42	18	3	2Y(79.9663),7S(79.9663)	sp|Q9BVJ6-3|UT14A_HUMAN	Q9BVJ6-3	UT14A_HUMAN	UTP14A	Isoform 3 of U3 small nucleolar RNA-associated protein 14 homolog A		sp|Q9BVJ6|UT14A_HUMAN	1	0	MS/MS	STY:79.9663@DY(0.8749)LLS(0.2490)ES(0.8761)EDEGDNDGERK;
DYLLSESEDEGDNDGERK	DY[79.9663]LLS[79.9663]ESEDEGDNDGERK	K	H	25	42	18	2	2Y(79.9663),5S(79.9663)	sp|Q9BVJ6-3|UT14A_HUMAN	Q9BVJ6-3	UT14A_HUMAN	UTP14A	Isoform 3 of U3 small nucleolar RNA-associated protein 14 homolog A		sp|Q9BVJ6|UT14A_HUMAN	3	3.1031592E7	MS/MS	STY:79.9663@DY(0.6851)LLS(0.6575)ES(0.6575)EDEGDNDGERK;
DYNASASTISPPSSMEEDK	DY[79.9663]NASASTISPPSSMEEDK	K	F	1199	1217	19	2	2Y(79.9663)	sp|P46821|MAP1B_HUMAN	P46821	MAP1B_HUMAN	MAP1B	Microtubule-associated protein 1B			1	5446790	MS/MS	STY:79.9663@DY(0.3962)NAS(0.0609)AS(0.0609)T(0.0609)IS(0.0609)PPS(0.0609)S(0.2992)MEEDK;
EAAAGIQWSEEETEDEEEEK	EAAAGIQWS[79.9663]EEET[79.9663]EDEEEEK	R	E	169	188	20	2,3	13T(79.9663),9S(79.9663)	sp|P46087-2|NOP2_HUMAN	P46087-2	NOP2_HUMAN	NOP2	Isoform 2 of Probable 28S rRNA (cytosine(4447)-C(5))-methyltransferase		sp|P46087-3|NOP2_HUMAN, sp|P46087-4|NOP2_HUMAN, sp|P46087|NOP2_HUMAN	4	2.1582806E7	MS/MS	STY:79.9663@EAAAGIQWS(1.0000)EEET(1.0000)EDEEEEK;
EAANEAGDSSQDEAEDDVK	EAANEAGDS[79.9663]S[79.9663]QDEAEDDVK	R	Q	153	171	19	2	10S(79.9663),9S(79.9663)	sp|Q9NVU0-2|RPC5_HUMAN	Q9NVU0-2	RPC5_HUMAN	POLR3E	Isoform 2 of DNA-directed RNA polymerase III subunit RPC5		sp|Q9NVU0-3|RPC5_HUMAN, sp|Q9NVU0-4|RPC5_HUMAN, sp|Q9NVU0-5|RPC5_HUMAN, sp|Q9NVU0|RPC5_HUMAN	1	0	MS/MS	STY:79.9663@EAANEAGDS(1.0000)S(1.0000)QDEAEDDVK;
EAARSPDKPGGSPSASR	EAARS[79.9663]PDKPGGS[79.9663]PSASR	R	R	45	61	17	2	12S(79.9663),5S(79.9663)	sp|Q9Y3T9|NOC2L_HUMAN	Q9Y3T9	NOC2L_HUMAN	NOC2L	Nucleolar complex protein 2 homolog			1	0	MS/MS	STY:79.9663@EAARS(0.5310)PDKPGGS(0.4897)PS(0.4897)AS(0.4897)R;
EAASSGDDSGRDREPPVQR	EAAS[79.9663]S[79.9663]GDDS[79.9663]GRDREPPVQR	K	K	297	315	19	3	4S(79.9663),5S(79.9663),9S(79.9663)	sp|Q9BW71|HIRP3_HUMAN	Q9BW71	HIRP3_HUMAN	HIRIP3	HIRA-interacting protein 3			1	4.4045552E7	MS/MS	STY:79.9663@EAAS(1.0000)S(1.0000)GDDS(1.0000)GRDREPPVQR;
EAAVSASDILQESAIHSPGTVEK	EAAVSASDILQESAIHS[79.9663]PGTVEK	R	E	163	185	23	3	17S(79.9663)	sp|Q96C57|CSTOS_HUMAN	Q96C57	CSTOS_HUMAN	CUSTOS	Protein CUSTOS			1	0	MS/MS	STY:79.9663@EAAVS(0.0130)AS(0.0138)DILQES(0.0161)AIHS(0.4786)PGT(0.4786)VEK;
EADDDEEVDDNIPEMPSPK	EADDDEEVDDNIPEMPS[79.9663]PK	K	K	714	732	19	2	17S(79.9663)	sp|P26358-2|DNMT1_HUMAN	P26358-2	DNMT1_HUMAN	DNMT1	Isoform 2 of DNA (cytosine-5)-methyltransferase 1		sp|P26358-3|DNMT1_HUMAN, sp|P26358|DNMT1_HUMAN	2	9622040	MS/MS	STY:79.9663@EADDDEEVDDNIPEMPS(1.0000)PK;
EADEEGGENGPADQGFQPQEEEEREDSDTEEQVPEALER	EADEEGGENGPADQGFQPQEEEEREDS[79.9663]DTEEQVPEALER	K	K	4989	5027	39	3,4	27S(79.9663)	sp|Q9NU22|MDN1_HUMAN	Q9NU22	MDN1_HUMAN	MDN1	Midasin			2	2.48841e+06	MS/MS	STY:79.9663@EADEEGGENGPADQGFQPQEEEEREDS(0.5000)DT(0.5000)EEQVPEALER;
EADIDSSDESDIEEDIDQPSAHK	EADIDS[79.9663]S[79.9663]DES[79.9663]DIEEDIDQPSAHK	K	T	414	436	23	3	10S(79.9663),6S(79.9663),7S(79.9663)	sp|Q9P2I0|CPSF2_HUMAN	Q9P2I0	CPSF2_HUMAN	CPSF2	Cleavage and polyadenylation specificity factor subunit 2			6	2.3840162E7	MS/MS	STY:79.9663@EADIDS(0.9453)S(0.9453)DES(0.9453)DIEEDIDQPS(0.1640)AHK;
EAEALLQSMGLTPESPIVPPPMSPSSK	EAEALLQSMGLTPESPIVPPPMS[79.9663]PSSK	R	S	59	85	27	3	23S(79.9663)	sp|Q13409-2|DC1I2_HUMAN	Q13409-2	DC1I2_HUMAN	DYNC1I2	Isoform 2B of Cytoplasmic dynein 1 intermediate chain 2		sp|Q13409-3|DC1I2_HUMAN, sp|Q13409-6|DC1I2_HUMAN	1	6.2629704E7	MS/MS	STY:79.9663@EAEALLQS(0.0816)MGLT(0.1826)PES(0.1826)PIVPPPMS(0.1844)PS(0.1844)S(0.1844)K;
EAEDSDSDDNIK	EAEDS[79.9663]DS[79.9663]DDNIK	K	R	507	518	12	2	5S(79.9663),7S(79.9663)	sp|Q96ST2|IWS1_HUMAN	Q96ST2	IWS1_HUMAN	IWS1	Protein IWS1 homolog		sp|Q96ST2-2|IWS1_HUMAN, sp|Q96ST2-3|IWS1_HUMAN	2	1.2184903E7	MS/MS	STY:79.9663@EAEDS(1.0000)DS(1.0000)DDNIK;
EAEDSDSDDNIKR	EAEDS[79.9663]DS[79.9663]DDNIKR	K	G	507	519	13	2	5S(79.9663),7S(79.9663)	sp|Q96ST2|IWS1_HUMAN	Q96ST2	IWS1_HUMAN	IWS1	Protein IWS1 homolog		sp|Q96ST2-2|IWS1_HUMAN, sp|Q96ST2-3|IWS1_HUMAN	2	2.94409e+06	MS/MS	STY:79.9663@EAEDS(1.0000)DS(1.0000)DDNIKR;
EAEEESSGGEEEDEDENIEVVYSK	EAEEESSGGEEEDEDENIEVVY[79.9663]S[79.9663]K	K	A	384	407	24	3	22Y(79.9663),23S(79.9663)	sp|P55010|IF5_HUMAN	P55010	IF5_HUMAN	EIF5	Eukaryotic translation initiation factor 5			6	4.2499392E7	MS/MS	STY:79.9663@EAEEES(0.0962)S(0.0962)GGEEEDEDENIEVVY(0.9038)S(0.9038)K;
EAEEESSGGEEEDEDENIEVVYSK	EAEEES[79.9663]SGGEEEDEDENIEVVYS[79.9663]K	K	A	384	407	24	3	23S(79.9663),6S(79.9663)	sp|P55010|IF5_HUMAN	P55010	IF5_HUMAN	EIF5	Eukaryotic translation initiation factor 5			1	0	MS/MS	STY:79.9663@EAEEES(0.4899)S(0.4899)GGEEEDEDENIEVVY(0.4899)S(0.5303)K;
EAEEESSGGEEEDEDENIEVVYSK	EAEEES[79.9663]S[79.9663]GGEEEDEDENIEVVYSK	K	A	384	407	24	3	6S(79.9663),7S(79.9663)	sp|P55010|IF5_HUMAN	P55010	IF5_HUMAN	EIF5	Eukaryotic translation initiation factor 5			29	1.90107952E8	MS/MS	STY:79.9663@EAEEES(0.9315)S(0.9315)GGEEEDEDENIEVVY(0.0685)S(0.0685)K;
EAEEGEDDRDSANGEDDS	EAEEGEDDRDSANGEDDS[79.9663]	K	-	276	293	18	2	18S(79.9663)	sp|P07910-2|HNRPC_HUMAN	P07910-2	HNRPC_HUMAN	HNRNPC	Isoform C1 of Heterogeneous nuclear ribonucleoproteins C1/C2		sp|P07910-3|HNRPC_HUMAN, sp|P07910-4|HNRPC_HUMAN, sp|P07910|HNRPC_HUMAN	2	2.32017792E8	MS/MS	STY:79.9663@EAEEGEDDRDS(0.0634)ANGEDDS(0.9366);
EAEEGEDDRDSANGEDDS	EAEEGEDDRDS[79.9663]ANGEDDS	K	-	276	293	18	2	11S(79.9663)	sp|P07910-2|HNRPC_HUMAN	P07910-2	HNRPC_HUMAN	HNRNPC	Isoform C1 of Heterogeneous nuclear ribonucleoproteins C1/C2		sp|P07910-3|HNRPC_HUMAN, sp|P07910-4|HNRPC_HUMAN, sp|P07910|HNRPC_HUMAN	15	9.9438246E8	MS/MS	STY:79.9663@EAEEGEDDRDS(0.9420)ANGEDDS(0.0580);
EAENQGLDISSPGMSGHR	EAENQGLDIS[79.9663]SPGMSGHR	K	Q	191	208	18	2	10S(79.9663)	sp|Q15545|TAF7_HUMAN	Q15545	TAF7_HUMAN	TAF7	Transcription initiation factor TFIID subunit 7			1	0	MS/MS	STY:79.9663@EAENQGLDIS(0.4645)S(0.4645)PGMS(0.0710)GHR;
EAPAEGEAAEPGSPTAAEGEAASAASSTSSPK	EAPAEGEAAEPGSPTAAEGEAASAASST[79.9663]S[79.9663]SPK	K	A	106	137	32	3	28T(79.9663),29S(79.9663)	sp|P29966|MARCS_HUMAN	P29966	MARCS_HUMAN	MARCKS	Myristoylated alanine-rich C-kinase substrate			1	3.21037e+06	MS/MS	STY:79.9663@EAPAEGEAAEPGS(0.1899)PT(0.2509)AAEGEAAS(0.2509)AAS(0.1945)S(0.1945)T(0.3064)S(0.3064)S(0.3064)PK;
EAPAEGEAAEPGSPTAAEGEAASAASSTSSPK	EAPAEGEAAEPGSPTAAEGEAASAAS[79.9663]STSSPK	K	A	106	137	32	3	26S(79.9663)	sp|P29966|MARCS_HUMAN	P29966	MARCS_HUMAN	MARCKS	Myristoylated alanine-rich C-kinase substrate			1	1.2920462E7	MS/MS	STY:79.9663@EAPAEGEAAEPGS(0.0088)PT(0.0088)AAEGEAAS(0.0092)AAS(0.4739)S(0.4739)T(0.0085)S(0.0085)S(0.0085)PK;
EAPAEGEAAEPGSPTAAEGEAASAASSTSSPK	EAPAEGEAAEPGSPTAAEGEAAS[79.9663]AASSTSSPK	K	A	106	137	32	3	23S(79.9663)	sp|P29966|MARCS_HUMAN	P29966	MARCS_HUMAN	MARCKS	Myristoylated alanine-rich C-kinase substrate			2	1.2920462E7	MS/MS	STY:79.9663@EAPAEGEAAEPGS(0.0089)PT(0.0090)AAEGEAAS(0.8912)AAS(0.0112)S(0.0112)T(0.0228)S(0.0228)S(0.0228)PK;
EAPAEGEAAEPGSPTAAEGEAASAASSTSSPK	EAPAEGEAAEPGSPTAAEGEAAS[79.9663]AASS[79.9663]TSSPK	K	A	106	137	32	3	23S(79.9663),27S(79.9663)	sp|P29966|MARCS_HUMAN	P29966	MARCS_HUMAN	MARCKS	Myristoylated alanine-rich C-kinase substrate			1	4.7283968E7	MS/MS	STY:79.9663@EAPAEGEAAEPGS(0.0379)PT(0.0379)AAEGEAAS(0.7832)AAS(0.1028)S(0.7721)T(0.0887)S(0.0887)S(0.0887)PK;
EAPAEGEAAEPGSPTAAEGEAASAASSTSSPK	EAPAEGEAAEPGSPTAAEGEAAS[79.9663]AAS[79.9663]S[79.9663]TSSPK	K	A	106	137	32	3	23S(79.9663),26S(79.9663),27S(79.9663)	sp|P29966|MARCS_HUMAN	P29966	MARCS_HUMAN	MARCKS	Myristoylated alanine-rich C-kinase substrate			1	3879364	MS/MS	STY:79.9663@EAPAEGEAAEPGS(0.0698)PT(0.0698)AAEGEAAS(0.4767)AAS(0.4767)S(0.4767)T(0.4767)S(0.4767)S(0.4767)PK;
EAPAEGEAAEPGSPTAAEGEAASAASSTSSPK	EAPAEGEAAEPGSPT[79.9663]AAEGEAASAASSTSSPK	K	A	106	137	32	3	15T(79.9663)	sp|P29966|MARCS_HUMAN	P29966	MARCS_HUMAN	MARCKS	Myristoylated alanine-rich C-kinase substrate			2	1.30827408E8	MS/MS	STY:79.9663@EAPAEGEAAEPGS(0.0117)PT(0.9215)AAEGEAAS(0.0109)AAS(0.0099)S(0.0099)T(0.0099)S(0.0099)S(0.0162)PK;
EAPAEGEAAEPGSPTAAEGEAASAASSTSSPK	EAPAEGEAAEPGS[79.9663]PTAAEGEAASAASSTSSPK	K	A	106	137	32	3	13S(79.9663)	sp|P29966|MARCS_HUMAN	P29966	MARCS_HUMAN	MARCKS	Myristoylated alanine-rich C-kinase substrate			7	1.30827408E8	MS/MS	STY:79.9663@EAPAEGEAAEPGS(0.8548)PT(0.0169)AAEGEAAS(0.0194)AAS(0.0210)S(0.0210)T(0.0210)S(0.0210)S(0.0250)PK;
EAPAEGEAAEPGSPTAAEGEAASAASSTSSPK	EAPAEGEAAEPGS[79.9663]PTAAEGEAASAASSTSS[79.9663]PK	K	A	106	137	32	3	13S(79.9663),30S(79.9663)	sp|P29966|MARCS_HUMAN	P29966	MARCS_HUMAN	MARCKS	Myristoylated alanine-rich C-kinase substrate			1	2.9783428E7	MS/MS	STY:79.9663@EAPAEGEAAEPGS(0.5823)PT(0.5823)AAEGEAAS(0.0203)AAS(0.0203)S(0.0180)T(0.0205)S(0.0205)S(0.7359)PK;
EAPAEGEAAEPGSPTAAEGEAASAASSTSSPK	EAPAEGEAAEPGS[79.9663]PTAAEGEAASAASST[79.9663]SSPK	K	A	106	137	32	3	13S(79.9663),28T(79.9663)	sp|P29966|MARCS_HUMAN	P29966	MARCS_HUMAN	MARCKS	Myristoylated alanine-rich C-kinase substrate			1	4.7283968E7	MS/MS	STY:79.9663@EAPAEGEAAEPGS(0.4416)PT(0.0567)AAEGEAAS(0.0348)AAS(0.1996)S(0.1996)T(0.3559)S(0.3559)S(0.3559)PK;
EAPAEGEAAEPGSPTAAEGEAASAASSTSSPK	EAPAEGEAAEPGS[79.9663]PTAAEGEAAS[79.9663]AASSTSSPK	K	A	106	137	32	3	13S(79.9663),23S(79.9663)	sp|P29966|MARCS_HUMAN	P29966	MARCS_HUMAN	MARCKS	Myristoylated alanine-rich C-kinase substrate			1	2.9783428E7	MS/MS	STY:79.9663@EAPAEGEAAEPGS(0.4829)PT(0.4829)AAEGEAAS(0.5879)AAS(0.0893)S(0.0893)T(0.0893)S(0.0893)S(0.0893)PK;
EAPAEGEAAEPGSPTAAEGEAASAASSTSSPK	EAPAEGEAAEPGS[79.9663]PT[79.9663]AAEGEAASAASSTSSPK	K	A	106	137	32	3	13S(79.9663),15T(79.9663)	sp|P29966|MARCS_HUMAN	P29966	MARCS_HUMAN	MARCKS	Myristoylated alanine-rich C-kinase substrate			4	4.7283968E7	MS/MS	STY:79.9663@EAPAEGEAAEPGS(0.4535)PT(0.4535)AAEGEAAS(0.0292)AAS(0.0522)S(0.0522)T(0.0522)S(0.4535)S(0.4535)PK;
EATNTTSEPSAPSQDLLDLSPSPR	EATNTTSEPSAPS[79.9663]QDLLDLSPSPR	K	M	302	325	24	3	13S(79.9663)	sp|O75674-2|TM1L1_HUMAN	O75674-2	TM1L1_HUMAN	TOM1L1	Isoform 2 of TOM1-like protein 1		sp|O75674-3|TM1L1_HUMAN, sp|O75674|TM1L1_HUMAN	1	0	MS/MS	STY:79.9663@EAT(0.0235)NT(0.0235)T(0.0142)S(0.0142)EPS(0.0051)APS(0.3065)QDLLDLS(0.3065)PS(0.3065)PR;
EATGLSPQAAQEK	EAT[79.9663]GLSPQAAQEK	R	D	8	20	13	2	3T(79.9663)	sp|P17029|ZKSC1_HUMAN	P17029	ZKSC1_HUMAN	ZKSCAN1	Zinc finger protein with KRAB and SCAN domains 1			2	2.59826e+06	MS/MS	STY:79.9663@EAT(0.5000)GLS(0.5000)PQAAQEK;
EAYSGCSGPVDSECPPPPSSPVHK	EAYSGC[57.0215]SGPVDSEC[57.0215]PPPPS[79.9663]SPVHK	K	A	246	269	24	3	14C(57.0215),19S(79.9663),6C(57.0215)	sp|Q8N556-2|AFAP1_HUMAN	Q8N556-2	AFAP1_HUMAN	AFAP1	Isoform 2 of Actin filament-associated protein 1		sp|Q8N556|AFAP1_HUMAN	3	1.2103783E7	MS/MS	STY:79.9663@EAY(0.0094)S(0.0094)GCS(0.0094)GPVDS(0.0094)ECPPPPS(0.4813)S(0.4813)PVHK;
EDDSEGEESEEEEEGEEEGSESESR	EDDS[79.9663]EGEES[79.9663]EEEEEGEEEGS[79.9663]ESESR	K	S	1534	1558	25	3	20S(79.9663),4S(79.9663),9S(79.9663)	sp|P51532-2|SMCA4_HUMAN	P51532-2	SMCA4_HUMAN	SMARCA4	Isoform 2 of Transcription activator BRG1		sp|P51532-3|SMCA4_HUMAN, sp|P51532-4|SMCA4_HUMAN, sp|P51532-5|SMCA4_HUMAN, sp|P51532|SMCA4_HUMAN	1	0	MS/MS	STY:79.9663@EDDS(0.6000)EGEES(0.6000)EEEEEGEEEGS(0.6000)ES(0.6000)ES(0.6000)R;
EDILENEDEQNSPPKK	EDILENEDEQNS[79.9663]PPKK	K	G	1272	1287	16	2,3	12S(79.9663)	sp|Q9NTI5-2|PDS5B_HUMAN	Q9NTI5-2	PDS5B_HUMAN	PDS5B	Isoform 2 of Sister chromatid cohesion protein PDS5 homolog B		sp|Q9NTI5-5|PDS5B_HUMAN, sp|Q9NTI5|PDS5B_HUMAN	6	1.513666E7	MS/MS	STY:79.9663@EDILENEDEQNS(1.0000)PPKK;
EDKPPLAPSGGTEGPEQPPPPCPSQTGSPPVGLIK	EDKPPLAPSGGTEGPEQPPPPC[57.0215]PSQTGS[79.9663]PPVGLIK	K	G	607	641	35	3	22C(57.0215),28S(79.9663)	sp|Q8WWM7-2|ATX2L_HUMAN	Q8WWM7-2	ATX2L_HUMAN	ATXN2L	Isoform 2 of Ataxin-2-like protein		sp|Q8WWM7-3|ATX2L_HUMAN, sp|Q8WWM7-4|ATX2L_HUMAN, sp|Q8WWM7-5|ATX2L_HUMAN, sp|Q8WWM7-6|ATX2L_HUMAN, sp|Q8WWM7-8|ATX2L_HUMAN, sp|Q8WWM7-9|ATX2L_HUMAN, sp|Q8WWM7|ATX2L_HUMAN	1	1.3757408E7	MS/MS	STY:79.9663@EDKPPLAPS(0.0259)GGT(0.0259)EGPEQPPPPCPS(0.0500)QT(0.0500)GS(0.8483)PPVGLIK;
EDKSPSEESAPTTSPESVSGSVPSSGSSGR	EDKS[79.9663]PSEESAPTTSPESVSGSVPSSGSSGR	R	E	120	149	30	3	4S(79.9663)	sp|P54725-3|RD23A_HUMAN	P54725-3	RD23A_HUMAN	RAD23A	Isoform 3 of UV excision repair protein RAD23 homolog A		sp|P54725-2|RD23A_HUMAN, sp|P54725|RD23A_HUMAN	1	0	MS/MS	STY:79.9663@EDKS(0.1471)PS(0.1471)EES(0.1471)APT(0.1471)T(0.1471)S(0.1471)PES(0.0167)VS(0.0167)GS(0.0167)VPS(0.0167)S(0.0167)GS(0.0167)S(0.0167)GR;
EDLPAENGETKTEESPASDEAGEK	EDLPAENGETKT[79.9663]EESPASDEAGEK	K	E	72	95	24	3	12T(79.9663)	sp|P05114|HMGN1_HUMAN	P05114	HMGN1_HUMAN	HMGN1	Non-histone chromosomal protein HMG-14			1	4724531	MS/MS	STY:79.9663@EDLPAENGET(0.1004)KT(0.5513)EES(0.1741)PAS(0.1741)DEAGEK;
EDLPAENGETKTEESPASDEAGEK	EDLPAENGET[79.9663]KTEESPAS[79.9663]DEAGEK	K	E	72	95	24	3	10T(79.9663),18S(79.9663)	sp|P05114|HMGN1_HUMAN	P05114	HMGN1_HUMAN	HMGN1	Non-histone chromosomal protein HMG-14			1	1.1558424E7	MS/MS	STY:79.9663@EDLPAENGET(0.4905)KT(0.4905)EES(0.4905)PAS(0.5285)DEAGEK;
EDLPAENGETKTEESPASDEAGEK	EDLPAENGET[79.9663]KTEES[79.9663]PASDEAGEK	K	E	72	95	24	3	10T(79.9663),15S(79.9663)	sp|P05114|HMGN1_HUMAN	P05114	HMGN1_HUMAN	HMGN1	Non-histone chromosomal protein HMG-14			2	3.43088e+06	MS/MS	STY:79.9663@EDLPAENGET(0.5955)KT(0.5955)EES(0.6418)PAS(0.1672)DEAGEK;
EDLPAENGETKTEESPASDEAGEK	EDLPAENGET[79.9663]KT[79.9663]EESPASDEAGEK	K	E	72	95	24	3	10T(79.9663),12T(79.9663)	sp|P05114|HMGN1_HUMAN	P05114	HMGN1_HUMAN	HMGN1	Non-histone chromosomal protein HMG-14			1	1.1558424E7	MS/MS	STY:79.9663@EDLPAENGET(0.5000)KT(0.5000)EES(0.5000)PAS(0.5000)DEAGEK;
EDLTDLEQPGSPGYSTATEPGSSELGVPEQPDLQEGTHVEK	EDLTDLEQPGSPGYSTATEPGSSELGVPEQPDLQEGT[79.9663]HVEK	K	S	304	344	41	4	37T(79.9663)	sp|Q92538-3|GBF1_HUMAN	Q92538-3	GBF1_HUMAN	GBF1	Isoform 3 of Golgi-specific brefeldin A-resistance guanine nucleotide exchange factor 1		sp|Q92538|GBF1_HUMAN	1	8492062	MS/MS	STY:79.9663@EDLT(0.0713)DLEQPGS(0.2210)PGY(0.0597)S(0.0597)T(0.0597)AT(0.0964)EPGS(0.0964)S(0.0964)ELGVPEQPDLQEGT(0.2394)HVEK;
EDLTDLEQPGSPGYSTATEPGSSELGVPEQPDLQEGTHVEK	EDLT[79.9663]DLEQPGSPGYSTATEPGSSELGVPEQPDLQEGTHVEK	K	S	304	344	41	3	4T(79.9663)	sp|Q92538-3|GBF1_HUMAN	Q92538-3	GBF1_HUMAN	GBF1	Isoform 3 of Golgi-specific brefeldin A-resistance guanine nucleotide exchange factor 1		sp|Q92538|GBF1_HUMAN	1	0	MS/MS	STY:79.9663@EDLT(0.3899)DLEQPGS(0.3899)PGY(0.0437)S(0.0437)T(0.0437)AT(0.0437)EPGS(0.0155)S(0.0155)ELGVPEQPDLQEGT(0.0142)HVEK;
EDNSEGEEILEEVGGDLEEEDDHHMEFCR	EDNS[79.9663]EGEEILEEVGGDLEEEDDHHMEFC[57.0215]R	K	V	425	453	29	3	28C(57.0215),4S(79.9663)	sp|Q14839-2|CHD4_HUMAN	Q14839-2	CHD4_HUMAN	CHD4	Isoform 2 of Chromodomain-helicase-DNA-binding protein 4		sp|Q14839|CHD4_HUMAN	2	4.1057088E7	MS/MS	STY:79.9663@EDNS(1.0000)EGEEILEEVGGDLEEEDDHHMEFCR;
EDNSEGEEILEEVGGDLEEEDDHHMEFCR	EDNS[79.9663]EGEEILEEVGGDLEEEDDHHM[15.9949]EFC[57.0215]R	K	V	425	453	29	3	25M(15.9949),28C(57.0215),4S(79.9663)	sp|Q14839-2|CHD4_HUMAN	Q14839-2	CHD4_HUMAN	CHD4	Isoform 2 of Chromodomain-helicase-DNA-binding protein 4		sp|Q14839|CHD4_HUMAN	2	0	MS/MS	STY:79.9663@EDNS(1.0000)EGEEILEEVGGDLEEEDDHHMEFCR;M:15.9949@EDNSEGEEILEEVGGDLEEEDDHHM(1.0000)EFCR;
EDPQARPLEGSSSEDSPPEGQAPPSHSPR	EDPQARPLEGSSSEDSPPEGQAPPS[79.9663]HSPR	R	G	1830	1858	29	3	25S(79.9663)	sp|Q12789-3|TF3C1_HUMAN	Q12789-3	TF3C1_HUMAN	GTF3C1	Isoform 2 of General transcription factor 3C polypeptide 1		sp|Q12789|TF3C1_HUMAN	1	5.78466e+06	MS/MS	STY:79.9663@EDPQARPLEGS(0.0576)S(0.0576)S(0.0576)EDS(0.0270)PPEGQAPPS(0.4001)HS(0.4001)PR;
EDQFNGSPPRPQPR	EDQFNGS[79.9663]PPRPQPR	K	G	167	180	14	2	7S(79.9663)	sp|Q69YN4-2|VIR_HUMAN	Q69YN4-2	VIR_HUMAN	VIRMA	Isoform 2 of Protein virilizer homolog		sp|Q69YN4-3|VIR_HUMAN, sp|Q69YN4-4|VIR_HUMAN, sp|Q69YN4|VIR_HUMAN	1	8608492	MS/MS	STY:79.9663@EDQFNGS(1.0000)PPRPQPR;
EDSDEEEDDDSEEDEEDDEDEDEDEDEIEPAAMK	EDS[79.9663]DEEEDDDS[79.9663]EEDEEDDEDEDEDEDEIEPAAMK	K	A	143	176	34	3	11S(79.9663),3S(79.9663)	sp|P19338|NUCL_HUMAN	P19338	NUCL_HUMAN	NCL	Nucleolin			2	2.0126394E7	MS/MS	STY:79.9663@EDS(1.0000)DEEEDDDS(1.0000)EEDEEDDEDEDEDEDEIEPAAMK;
EDSDEEEDDDSEEDEEDDEDEDEDEDEIEPAAMK	EDS[79.9663]DEEEDDDS[79.9663]EEDEEDDEDEDEDEDEIEPAAM[15.9949]K	K	A	143	176	34	3	11S(79.9663),33M(15.9949),3S(79.9663)	sp|P19338|NUCL_HUMAN	P19338	NUCL_HUMAN	NCL	Nucleolin			1	0	MS/MS	STY:79.9663@EDS(1.0000)DEEEDDDS(1.0000)EEDEEDDEDEDEDEDEIEPAAMK;M:15.9949@EDSDEEEDDDSEEDEEDDEDEDEDEDEIEPAAM(1.0000)K;
EDSGTFSLGK	EDS[79.9663]GTFSLGK	R	M	16	25	10	2	3S(79.9663)	sp|O75569|PRKRA_HUMAN	O75569	PRKRA_HUMAN	PRKRA	Interferon-inducible double-stranded RNA-dependent protein kinase activator A			1	1.06658e+06	MS/MS	STY:79.9663@EDS(0.3333)GT(0.3333)FS(0.3333)LGK;
EEALDDAEEPESPPPPPRSPSPEPTVVDTPSHASQSAR	EEALDDAEEPESPPPPPRSPSPEPT[79.9663]VVDT[79.9663]PS[79.9663]HASQSAR	K	F	541	578	38	3	25T(79.9663),29T(79.9663),31S(79.9663)	sp|Q9P2R6-2|RERE_HUMAN	Q9P2R6-2	RERE_HUMAN	RERE	Isoform 2 of Arginine-glutamic acid dipeptide repeats protein		sp|Q9P2R6|RERE_HUMAN	1	0	MS/MS	STY:79.9663@EEALDDAEEPES(0.2396)PPPPPRS(0.1074)PS(0.1074)PEPT(0.5091)VVDT(0.5091)PS(0.5091)HAS(0.5091)QS(0.5091)AR;
EEALDDAEEPESPPPPPRSPSPEPTVVDTPSHASQSAR	EEALDDAEEPES[79.9663]PPPPPRS[79.9663]PS[79.9663]PEPTVVDTPSHASQSAR	K	F	541	578	38	3	12S(79.9663),19S(79.9663),21S(79.9663)	sp|Q9P2R6-2|RERE_HUMAN	Q9P2R6-2	RERE_HUMAN	RERE	Isoform 2 of Arginine-glutamic acid dipeptide repeats protein		sp|Q9P2R6|RERE_HUMAN	1	0	MS/MS	STY:79.9663@EEALDDAEEPES(0.6968)PPPPPRS(0.6968)PS(0.6968)PEPT(0.1908)VVDT(0.1908)PS(0.1908)HAS(0.1686)QS(0.1686)AR;
EEAPASPLRPLYPQISPLK	EEAPASPLRPLYPQIS[79.9663]PLK	K	I	45	63	19	3	16S(79.9663)	sp|P85037-2|FOXK1_HUMAN	P85037-2	FOXK1_HUMAN	FOXK1	Isoform 2 of Forkhead box protein K1		sp|P85037|FOXK1_HUMAN	1	5.73395e+06	MS/MS	STY:79.9663@EEAPAS(0.0456)PLRPLY(0.0559)PQIS(0.8985)PLK;
EEAPASPLRPLYPQISPLK	EEAPAS[79.9663]PLRPLYPQISPLK	K	I	45	63	19	3	6S(79.9663)	sp|P85037-2|FOXK1_HUMAN	P85037-2	FOXK1_HUMAN	FOXK1	Isoform 2 of Forkhead box protein K1		sp|P85037|FOXK1_HUMAN	1	4.95927e+06	MS/MS	STY:79.9663@EEAPAS(0.8435)PLRPLY(0.0783)PQIS(0.0783)PLK;
EEATYGVWAERDSDDERPSFGGK	EEATYGVWAERDS[79.9663]DDERPSFGGK	K	R	47	69	23	3	13S(79.9663)	sp|Q9UBB9|TFP11_HUMAN	Q9UBB9	TFP11_HUMAN	TFIP11	Tuftelin-interacting protein 11			1	8499856	MS/MS	STY:79.9663@EEAT(0.2620)Y(0.2620)GVWAERDS(0.4615)DDERPS(0.0145)FGGK;
EECPRPMSISPPDFSPK	EEC[57.0215]PRPMSISPPDFS[79.9663]PK	K	T	1611	1627	17	3	15S(79.9663),3C(57.0215)	sp|P46821|MAP1B_HUMAN	P46821	MAP1B_HUMAN	MAP1B	Microtubule-associated protein 1B			1	3.67252e+06	MS/MS	STY:79.9663@EECPRPMS(0.0751)IS(0.0751)PPDFS(0.8498)PK;
EECPRPMSISPPDFSPK	EEC[57.0215]PRPMS[79.9663]IS[79.9663]PPDFSPK	K	T	1611	1627	17	3	10S(79.9663),3C(57.0215),8S(79.9663)	sp|P46821|MAP1B_HUMAN	P46821	MAP1B_HUMAN	MAP1B	Microtubule-associated protein 1B			1	1.3132223E7	MS/MS	STY:79.9663@EECPRPMS(0.6667)IS(0.6667)PPDFS(0.6667)PK;
EECPRPMSISPPDFSPK	EEC[57.0215]PRPMS[79.9663]IS[79.9663]PPDFS[79.9663]PK	K	T	1611	1627	17	3	10S(79.9663),15S(79.9663),3C(57.0215),8S(79.9663)	sp|P46821|MAP1B_HUMAN	P46821	MAP1B_HUMAN	MAP1B	Microtubule-associated protein 1B			2	3.30869e+06	MS/MS	STY:79.9663@EECPRPMS(1.0000)IS(1.0000)PPDFS(1.0000)PK;
EEDCHSPTSKPPKPDQPLK	EEDC[57.0215]HS[79.9663]PTSKPPKPDQPLK	K	V	415	433	19	3,4	4C(57.0215),6S(79.9663)	sp|P23588-2|IF4B_HUMAN	P23588-2	IF4B_HUMAN	EIF4B	Isoform 2 of Eukaryotic translation initiation factor 4B		sp|P23588|IF4B_HUMAN	7	9.6838608E7	MS/MS	STY:79.9663@EEDCHS(0.9172)PT(0.0414)S(0.0414)KPPKPDQPLK;
EEDEEPESPPEK	EEDEEPES[79.9663]PPEK	K	K	207	218	12	2	8S(79.9663)	sp|Q9H1E3|NUCKS_HUMAN	Q9H1E3	NUCKS_HUMAN	NUCKS1	Nuclear ubiquitous casein and cyclin-dependent kinase substrate 1		sp|Q9H1E3-2|NUCKS_HUMAN	20	9.7568768E7	MS/MS	STY:79.9663@EEDEEPES(1.0000)PPEK;
EEDEEPESPPEKK	EEDEEPES[79.9663]PPEKK	K	T	207	219	13	2	8S(79.9663)	sp|Q9H1E3|NUCKS_HUMAN	Q9H1E3	NUCKS_HUMAN	NUCKS1	Nuclear ubiquitous casein and cyclin-dependent kinase substrate 1		sp|Q9H1E3-2|NUCKS_HUMAN	4	1.5568783E7	MS/MS	STY:79.9663@EEDEEPES(1.0000)PPEKK;
EEDEPEERSGDETPGSEVPGDK	EEDEPEERSGDET[79.9663]PGSEVPGDK	R	A	153	174	22	3	13T(79.9663)	sp|Q1KMD3|HNRL2_HUMAN	Q1KMD3	HNRL2_HUMAN	HNRNPUL2	Heterogeneous nuclear ribonucleoprotein U-like protein 2			1	2.2502556E7	MS/MS	STY:79.9663@EEDEPEERS(0.0685)GDET(0.4657)PGS(0.4657)EVPGDK;
EEDEPEERSGDETPGSEVPGDK	EEDEPEERS[79.9663]GDETPGSEVPGDK	R	A	153	174	22	3	9S(79.9663)	sp|Q1KMD3|HNRL2_HUMAN	Q1KMD3	HNRL2_HUMAN	HNRNPUL2	Heterogeneous nuclear ribonucleoprotein U-like protein 2			1	2.2502556E7	MS/MS	STY:79.9663@EEDEPEERS(0.8978)GDET(0.0556)PGS(0.0467)EVPGDK;
EEDEPEERSGDETPGSEVPGDK	EEDEPEERS[79.9663]GDETPGS[79.9663]EVPGDK	R	A	153	174	22	3	16S(79.9663),9S(79.9663)	sp|Q1KMD3|HNRL2_HUMAN	Q1KMD3	HNRL2_HUMAN	HNRNPUL2	Heterogeneous nuclear ribonucleoprotein U-like protein 2			1	0	MS/MS	STY:79.9663@EEDEPEERS(0.6575)GDET(0.6575)PGS(0.6850)EVPGDK;
EEEEGISQESSEEEQ	EEEEGISQES[79.9663]SEEEQ	K	-	93	107	15	2	10S(79.9663)	sp|P17096|HMGA1_HUMAN	P17096	HMGA1_HUMAN	HMGA1	High mobility group protein HMG-I/HMG-Y		sp|P17096-2|HMGA1_HUMAN	1	1.1712202E7	MS/MS	STY:79.9663@EEEEGIS(0.0810)QES(0.4595)S(0.4595)EEEQ;
EEEEGISQESSEEEQ	EEEEGISQES[79.9663]S[79.9663]EEEQ	K	-	93	107	15	2	10S(79.9663),11S(79.9663)	sp|P17096|HMGA1_HUMAN	P17096	HMGA1_HUMAN	HMGA1	High mobility group protein HMG-I/HMG-Y		sp|P17096-2|HMGA1_HUMAN	7	3.7172768E8	MS/MS	STY:79.9663@EEEEGIS(0.1172)QES(0.9414)S(0.9414)EEEQ;
EEEEGISQESSEEEQ	EEEEGIS[79.9663]QESSEEEQ	K	-	93	107	15	2	7S(79.9663)	sp|P17096|HMGA1_HUMAN	P17096	HMGA1_HUMAN	HMGA1	High mobility group protein HMG-I/HMG-Y		sp|P17096-2|HMGA1_HUMAN	1	1.1712202E7	MS/MS	STY:79.9663@EEEEGIS(0.3333)QES(0.3333)S(0.3333)EEEQ;
EEEEGISQESSEEEQ	EEEEGIS[79.9663]QES[79.9663]SEEEQ	K	-	93	107	15	2	10S(79.9663),7S(79.9663)	sp|P17096|HMGA1_HUMAN	P17096	HMGA1_HUMAN	HMGA1	High mobility group protein HMG-I/HMG-Y		sp|P17096-2|HMGA1_HUMAN	9	3.7172768E8	MS/MS	STY:79.9663@EEEEGIS(0.8923)QES(0.8952)S(0.2125)EEEQ;
EEEEGISQESSEEEQ	EEEEGIS[79.9663]QES[79.9663]S[79.9663]EEEQ	K	-	93	107	15	2	10S(79.9663),11S(79.9663),7S(79.9663)	sp|P17096|HMGA1_HUMAN	P17096	HMGA1_HUMAN	HMGA1	High mobility group protein HMG-I/HMG-Y		sp|P17096-2|HMGA1_HUMAN	6	1.18306336E8	MS/MS	STY:79.9663@EEEEGIS(1.0000)QES(1.0000)S(1.0000)EEEQ;
EEERKDDNDEEEEDIDFFEDIDSDEDEGGLFGSK	EEERKDDNDEEEEDIDFFEDIDS[79.9663]DEDEGGLFGSK	K	K	220	253	34	3	23S(79.9663)	sp|O00566|MPP10_HUMAN	O00566	MPP10_HUMAN	MPHOSPH10	U3 small nucleolar ribonucleoprotein protein MPP10			1	0	MS/MS	STY:79.9663@EEERKDDNDEEEEDIDFFEDIDS(0.9090)DEDEGGLFGS(0.0910)K;
EEETSIDVAGKPNEVTK	EEET[79.9663]SIDVAGKPNEVTK	K	A	463	479	17	2	4T(79.9663)	sp|P53985|MOT1_HUMAN	P53985	MOT1_HUMAN	SLC16A1	Monocarboxylate transporter 1			1	0	MS/MS	STY:79.9663@EEET(0.4886)S(0.4886)IDVAGKPNEVT(0.0229)K;
EEGPPPPSPDGASSDAEPEPPSGR	EEGPPPPS[79.9663]PDGASSDAEPEPPSGR	R	T	15	38	24	3	8S(79.9663)	sp|Q9NTJ3-2|SMC4_HUMAN	Q9NTJ3-2	SMC4_HUMAN	SMC4	Isoform 2 of Structural maintenance of chromosomes protein 4		sp|Q9NTJ3|SMC4_HUMAN	1	0	MS/MS	STY:79.9663@EEGPPPPS(0.2500)PDGAS(0.2500)S(0.2500)DAEPEPPS(0.2500)GR;
EEGSDIEDEDMEELLNDTR	EEGS[79.9663]DIEDEDMEELLNDTR	R	L	148	166	19	2	4S(79.9663)	sp|Q8NHQ9-2|DDX55_HUMAN	Q8NHQ9-2	DDX55_HUMAN	DDX55	Isoform 2 of ATP-dependent RNA helicase DDX55		sp|Q8NHQ9|DDX55_HUMAN	1	0	MS/MS	STY:79.9663@EEGS(0.9222)DIEDEDMEELLNDT(0.0778)R;
EEHGIELSSPRHSDNPSEEGEVK	EEHGIELS[79.9663]S[79.9663]PRHSDNPS[79.9663]EEGEVK	K	D	1357	1379	23	3	17S(79.9663),8S(79.9663),9S(79.9663)	sp|O14647-2|CHD2_HUMAN	O14647-2	CHD2_HUMAN	CHD2	Isoform 2 of Chromodomain-helicase-DNA-binding protein 2		sp|O14647|CHD2_HUMAN	1	2.85058e+06	MS/MS	STY:79.9663@EEHGIELS(0.7450)S(0.7450)PRHS(0.7450)DNPS(0.7651)EEGEVK;
EELEQQTDGDCEEDEEEENDGETPK	EELEQQTDGDC[57.0215]EEDEEEENDGET[79.9663]PK	K	S	369	393	25	3	11C(57.0215),23T(79.9663)	sp|Q99442|SEC62_HUMAN	Q99442	SEC62_HUMAN	SEC62	Translocation protein SEC62			2	3.0654004E7	MS/MS	STY:79.9663@EELEQQT(0.4370)DGDCEEDEEEENDGET(0.5630)PK;
EELEQQTDGDCEEDEEEENDGETPK	EELEQQT[79.9663]DGDC[57.0215]EEDEEEENDGETPK	K	S	369	393	25	3	11C(57.0215),7T(79.9663)	sp|Q99442|SEC62_HUMAN	Q99442	SEC62_HUMAN	SEC62	Translocation protein SEC62			1	3.0014176E7	MS/MS	STY:79.9663@EELEQQT(0.7204)DGDCEEDEEEENDGET(0.2796)PK;
EELMSSDLEETAGSTSIPK	EELMSSDLEETAGST[79.9663]SIPK	K	R	515	533	19	3	15T(79.9663)	sp|O00567|NOP56_HUMAN	O00567	NOP56_HUMAN	NOP56	Nucleolar protein 56			1	8416416	MS/MS	STY:79.9663@EELMS(0.1803)S(0.1803)DLEET(0.0063)AGS(0.0063)T(0.3134)S(0.3134)IPK;
EELMSSDLEETAGSTSIPK	EELMSSDLEETAGS[79.9663]TSIPK	K	R	515	533	19	3	14S(79.9663)	sp|O00567|NOP56_HUMAN	O00567	NOP56_HUMAN	NOP56	Nucleolar protein 56			1	0	MS/MS	STY:79.9663@EELMS(0.0176)S(0.0176)DLEET(0.0176)AGS(0.3157)T(0.3157)S(0.3157)IPK;
EELMSSDLEETAGSTSIPK	EELMS[79.9663]SDLEETAGSTSIPK	K	R	515	533	19	2,3	5S(79.9663)	sp|O00567|NOP56_HUMAN	O00567	NOP56_HUMAN	NOP56	Nucleolar protein 56			4	7.0184896E7	MS/MS	STY:79.9663@EELMS(0.4740)S(0.4740)DLEET(0.0105)AGS(0.0105)T(0.0155)S(0.0155)IPK;
EELMSSDLEETAGSTSIPK	EELMS[79.9663]S[79.9663]DLEETAGSTSIPK	K	R	515	533	19	2	5S(79.9663),6S(79.9663)	sp|O00567|NOP56_HUMAN	O00567	NOP56_HUMAN	NOP56	Nucleolar protein 56			1	0	MS/MS	STY:79.9663@EELMS(0.3871)S(0.3871)DLEET(0.3871)AGS(0.0647)T(0.3871)S(0.3871)IPK;
EELMSSDLEETAGSTSIPK	EELM[15.9949]SSDLEETAGS[79.9663]TSIPK	K	R	515	533	19	2	14S(79.9663),4M(15.9949)	sp|O00567|NOP56_HUMAN	O00567	NOP56_HUMAN	NOP56	Nucleolar protein 56			1	0	MS/MS	STY:79.9663@EELMS(0.0099)S(0.0200)DLEET(0.0200)AGS(0.3167)T(0.3167)S(0.3167)IPK;M:15.9949@EELM(1.0000)SSDLEETAGSTSIPK;
EELMSSDLEETAGSTSIPK	EELM[15.9949]S[79.9663]SDLEETAGSTSIPK	K	R	515	533	19	2	4M(15.9949),5S(79.9663)	sp|O00567|NOP56_HUMAN	O00567	NOP56_HUMAN	NOP56	Nucleolar protein 56			1	0	MS/MS	STY:79.9663@EELMS(0.4663)S(0.4663)DLEET(0.0168)AGS(0.0168)T(0.0168)S(0.0168)IPK;M:15.9949@EELM(1.0000)SSDLEETAGSTSIPK;
EELQANGSAPAADKEEPAAAGSGAASPSAAEK	EELQANGSAPAADKEEPAAAGSGAAS[79.9663]PSAAEK	K	G	56	87	32	3	26S(79.9663)	sp|P29966|MARCS_HUMAN	P29966	MARCS_HUMAN	MARCKS	Myristoylated alanine-rich C-kinase substrate			1	9139350	MS/MS	STY:79.9663@EELQANGS(0.0295)APAADKEEPAAAGS(0.0534)GAAS(0.4585)PS(0.4585)AAEK;
EELQANGSAPAADKEEPAAAGSGAASPSAAEK	EELQANGSAPAADKEEPAAAGS[79.9663]GAASPSAAEK	K	G	56	87	32	3	22S(79.9663)	sp|P29966|MARCS_HUMAN	P29966	MARCS_HUMAN	MARCKS	Myristoylated alanine-rich C-kinase substrate			1	0	MS/MS	STY:79.9663@EELQANGS(0.0293)APAADKEEPAAAGS(0.3236)GAAS(0.3236)PS(0.3236)AAEK;
EELQANGSAPAADKEEPAAAGSGAASPSAAEK	EELQANGS[79.9663]APAADKEEPAAAGSGAASPSAAEK	K	G	56	87	32	3	8S(79.9663)	sp|P29966|MARCS_HUMAN	P29966	MARCS_HUMAN	MARCKS	Myristoylated alanine-rich C-kinase substrate			2	9139350	MS/MS	STY:79.9663@EELQANGS(0.6052)APAADKEEPAAAGS(0.0256)GAAS(0.1846)PS(0.1846)AAEK;
EELTPGAPQHQLPPVPGSPEPYPGQQAPGPEPSQPLLELTPR	EELTPGAPQHQLPPVPGSPEPYPGQQAPGPEPS[79.9663]QPLLELTPR	K	A	143	184	42	4	33S(79.9663)	sp|Q9H6F5|CCD86_HUMAN	Q9H6F5	CCD86_HUMAN	CCDC86	Coiled-coil domain-containing protein 86			2	0	MS/MS	STY:79.9663@EELT(0.0128)PGAPQHQLPPVPGS(0.0195)PEPY(0.0195)PGQQAPGPEPS(0.4740)QPLLELT(0.4740)PR;
EELTPGAPQHQLPPVPGSPEPYPGQQAPGPEPSQPLLELTPR	EELTPGAPQHQLPPVPGSPEPY[79.9663]PGQQAPGPEPSQPLLELTPR	K	A	143	184	42	4	22Y(79.9663)	sp|Q9H6F5|CCD86_HUMAN	Q9H6F5	CCD86_HUMAN	CCDC86	Coiled-coil domain-containing protein 86			1	2.5763574E7	MS/MS	STY:79.9663@EELT(0.0242)PGAPQHQLPPVPGS(0.0338)PEPY(0.7066)PGQQAPGPEPS(0.1267)QPLLELT(0.1087)PR;
EELTPGAPQHQLPPVPGSPEPYPGQQAPGPEPSQPLLELTPR	EELTPGAPQHQLPPVPGS[79.9663]PEPYPGQQAPGPEPSQPLLELTPR	K	A	143	184	42	4	18S(79.9663)	sp|Q9H6F5|CCD86_HUMAN	Q9H6F5	CCD86_HUMAN	CCDC86	Coiled-coil domain-containing protein 86			1	2.5763574E7	MS/MS	STY:79.9663@EELT(0.0166)PGAPQHQLPPVPGS(0.8409)PEPY(0.0199)PGQQAPGPEPS(0.0302)QPLLELT(0.0923)PR;
EENPESDGEPVVEDGTSVK	EENPES[79.9663]DGEPVVEDGTSVK	K	T	261	279	19	2	6S(79.9663)	sp|Q13439-3|GOGA4_HUMAN	Q13439-3	GOGA4_HUMAN	GOLGA4	Isoform 3 of Golgin subfamily A member 4		sp|Q13439-4|GOGA4_HUMAN, sp|Q13439-5|GOGA4_HUMAN, sp|Q13439|GOGA4_HUMAN	1	0	MS/MS	STY:79.9663@EENPES(0.8201)DGEPVVEDGT(0.0900)S(0.0900)VK;
EEPAAAGSGAASPSAAEK	EEPAAAGSGAAS[79.9663]PSAAEK	K	G	70	87	18	2	12S(79.9663)	sp|P29966|MARCS_HUMAN	P29966	MARCS_HUMAN	MARCKS	Myristoylated alanine-rich C-kinase substrate			1	4794404	MS/MS	STY:79.9663@EEPAAAGS(0.1610)GAAS(0.7084)PS(0.1306)AAEK;
EEPLSEEEPCTSTAIASPEKK	EEPLS[79.9663]EEEPC[57.0215]TSTAIAS[79.9663]PEKK	K	K	498	518	21	3	10C(57.0215),17S(79.9663),5S(79.9663)	sp|Q9Y2X3|NOP58_HUMAN	Q9Y2X3	NOP58_HUMAN	NOP58	Nucleolar protein 58			2	1.164819E7	MS/MS	STY:79.9663@EEPLS(0.9235)EEEPCT(0.0512)S(0.0512)T(0.0512)AIAS(0.9229)PEKK;
EEPSQNDISPK	EEPS[79.9663]QNDISPK	K	T	81	91	11	2	4S(79.9663)	sp|Q9NR30|DDX21_HUMAN	Q9NR30	DDX21_HUMAN	DDX21	Nucleolar RNA helicase 2		sp|Q9NR30-2|DDX21_HUMAN	2	4741577	MS/MS	STY:79.9663@EEPS(0.7737)QNDIS(0.2263)PK;
EESEDPDYYQYNIQGSHHSSEGNEGTEMEVPAEDDDYSPPSK	EESEDPDYYQYNIQGSHHSSEGNEGTEMEVPAEDDDYS[79.9663]PPSK	K	R	241	282	42	4	38S(79.9663)	sp|P78347-2|GTF2I_HUMAN	P78347-2	GTF2I_HUMAN	GTF2I	Isoform 2 of General transcription factor II-I			1	2.0926644E7	MS/MS	STY:79.9663@EES(0.0130)EDPDY(0.0130)Y(0.0300)QY(0.0584)NIQGS(0.0584)HHS(0.0584)S(0.0584)EGNEGT(0.0584)EMEVPAEDDDY(0.0145)S(0.6324)PPS(0.0051)K;
EESEDPDYYQYNIQGSHHSSEGNEGTEMEVPAEDDDYSPPSK	EESEDPDYY[79.9663]QYNIQGSHHSSEGNEGTEMEVPAEDDDYSPPSK	K	R	241	282	42	4	9Y(79.9663)	sp|P78347-2|GTF2I_HUMAN	P78347-2	GTF2I_HUMAN	GTF2I	Isoform 2 of General transcription factor II-I			1	2.0926644E7	MS/MS	STY:79.9663@EES(0.0148)EDPDY(0.0148)Y(0.8916)QY(0.0142)NIQGS(0.0142)HHS(0.0109)S(0.0097)EGNEGT(0.0090)EMEVPAEDDDY(0.0069)S(0.0069)PPS(0.0069)K;
EESEESDDDMGFGLFD	EESEES[79.9663]DDDMGFGLFD	K	-	100	115	16	2	6S(79.9663)	sp|P05387|RLA2_HUMAN	P05387	RLA2_HUMAN	RPLP2	Large ribosomal subunit protein P2	RPLP1	sp|P05386-2|RLA1_HUMAN, sp|P05386|RLA1_HUMAN	1	3234949	MS/MS	STY:79.9663@EES(0.1092)EES(0.8908)DDDMGFGLFD;
EESERKLLSK	EESERKLLS[79.9663]K	K	D	1102	1111	10	2	9S(79.9663)	sp|Q5T5U3|RHG21_HUMAN	Q5T5U3	RHG21_HUMAN	ARHGAP21	Rho GTPase-activating protein 21		sp|Q5T5U3-3|RHG21_HUMAN	1	0	MS/MS	STY:79.9663@EES(0.0614)ERKLLS(0.9386)K;
EESSELEQPFAQDTSSVGPDRK	EESSELEQPFAQDTSS[79.9663]VGPDRK	K	L	163	184	22	3	16S(79.9663)	sp|Q15424-2|SAFB1_HUMAN	Q15424-2	SAFB1_HUMAN	SAFB	Isoform 2 of Scaffold attachment factor B1	SAFB2	sp|Q14151|SAFB2_HUMAN, sp|Q15424-3|SAFB1_HUMAN, sp|Q15424-4|SAFB1_HUMAN, sp|Q15424|SAFB1_HUMAN	1	1.0765754E7	MS/MS	STY:79.9663@EES(0.0218)S(0.0218)ELEQPFAQDT(0.1441)S(0.1441)S(0.6682)VGPDRK;
EESEEEEDEDDEEEEEEEK	EES[79.9663]EEEEDEDDEEEEEEEK	R	G	30	48	19	2	3S(79.9663)	sp|P35659-2|DEK_HUMAN	P35659-2	DEK_HUMAN	DEK	Isoform 2 of Protein DEK		sp|P35659|DEK_HUMAN	2	0	MS/MS	STY:79.9663@EES(1.0000)EEEEDEDDEEEEEEEK;
EESEESDDDMGFGLFD	EES[79.9663]EESDDDMGFGLFD	K	-	100	115	16	2	3S(79.9663)	sp|P05387|RLA2_HUMAN	P05387	RLA2_HUMAN	RPLP2	Large ribosomal subunit protein P2	RPLP1	sp|P05386-2|RLA1_HUMAN, sp|P05386|RLA1_HUMAN	1	3234949	MS/MS	STY:79.9663@EES(0.5000)EES(0.5000)DDDMGFGLFD;
EESEESDEDMGFGLFD	EES[79.9663]EESDEDMGFGLFD	K	-	240	255	16	2	3S(79.9663)	sp|P05388-2|RLA0_HUMAN	P05388-2	RLA0_HUMAN	RPLP0	Isoform 2 of Large ribosomal subunit protein uL10	RPLP0P6	sp|P05388|RLA0_HUMAN, sp|Q8NHW5|RLA0L_HUMAN	4	2.4192986E7	MS/MS	STY:79.9663@EES(0.6669)EES(0.3331)DEDMGFGLFD;
EESEESEAEPVQR	EES[79.9663]EES[79.9663]EAEPVQR	R	T	194	206	13	2	3S(79.9663),6S(79.9663)	sp|Q9BW71|HIRP3_HUMAN	Q9BW71	HIRP3_HUMAN	HIRIP3	HIRA-interacting protein 3			2	3.08418e+06	MS/MS	STY:79.9663@EES(1.0000)EES(1.0000)EAEPVQR;
EETPPPVEPEEEEDTEDAGLDDWEAMASDEETEK	EETPPPVEPEEEEDTEDAGLDDWEAMAS[79.9663]DEETEK	K	V	484	517	34	3	28S(79.9663)	sp|O60841|IF2P_HUMAN	O60841	IF2P_HUMAN	EIF5B	Eukaryotic translation initiation factor 5B			1	1.8682594E7	MS/MS	STY:79.9663@EET(0.0315)PPPVEPEEEEDT(0.0144)EDAGLDDWEAMAS(0.4770)DEET(0.4770)EK;
EETNGPSNQKPVKSPDNSIK	EET[79.9663]NGPSNQKPVKSPDNSIK	K	M	447	466	20	3	3T(79.9663)	sp|Q9UKL0|RCOR1_HUMAN	Q9UKL0	RCOR1_HUMAN	RCOR1	REST corepressor 1			1	2.08024e+06	MS/MS	STY:79.9663@EET(0.2500)NGPS(0.2500)NQKPVKS(0.2500)PDNS(0.2500)IK;
EFDELNPSAQR	EFDELNPS[79.9663]AQR	R	D	656	666	11	2	8S(79.9663)	sp|P16615-2|AT2A2_HUMAN	P16615-2	AT2A2_HUMAN	ATP2A2	Isoform 2 of Sarcoplasmic/endoplasmic reticulum calcium ATPase 2		sp|P16615-3|AT2A2_HUMAN, sp|P16615-4|AT2A2_HUMAN, sp|P16615-5|AT2A2_HUMAN, sp|P16615|AT2A2_HUMAN	2	3286290	MS/MS	STY:79.9663@EFDELNPS(1.0000)AQR;
EFGDGSDENEMEEHELK	EFGDGS[79.9663]DENEMEEHELK	K	D	278	294	17	3	6S(79.9663)	sp|Q5F1R6-2|DJC21_HUMAN	Q5F1R6-2	DJC21_HUMAN	DNAJC21	Isoform 2 of DnaJ homolog subfamily C member 21		sp|Q5F1R6-3|DJC21_HUMAN, sp|Q5F1R6|DJC21_HUMAN	1	0	MS/MS	STY:79.9663@EFGDGS(1.0000)DENEMEEHELK;
EFITGDVEPTDAESEWHSENEEEEK	EFITGDVEPTDAESEWHS[79.9663]ENEEEEK	R	L	108	132	25	3	18S(79.9663)	sp|Q99733-2|NP1L4_HUMAN	Q99733-2	NP1L4_HUMAN	NAP1L4	Isoform 2 of Nucleosome assembly protein 1-like 4		sp|Q99733|NP1L4_HUMAN	3	4.62899168E8	MS/MS	STY:79.9663@EFIT(0.4799)GDVEPT(0.0159)DAES(0.0165)EWHS(0.4878)ENEEEEK;
EFITGDVEPTDAESEWHSENEEEEK	EFITGDVEPTDAES[79.9663]EWHSENEEEEK	R	L	108	132	25	3	14S(79.9663)	sp|Q99733-2|NP1L4_HUMAN	Q99733-2	NP1L4_HUMAN	NAP1L4	Isoform 2 of Nucleosome assembly protein 1-like 4		sp|Q99733|NP1L4_HUMAN	1	4.23513376E8	MS/MS	STY:79.9663@EFIT(0.0158)GDVEPT(0.1915)DAES(0.4316)EWHS(0.3612)ENEEEEK;
EFITGDVEPTDAESEWHSENEEEEK	EFITGDVEPT[79.9663]DAESEWHSENEEEEK	R	L	108	132	25	3	10T(79.9663)	sp|Q99733-2|NP1L4_HUMAN	Q99733-2	NP1L4_HUMAN	NAP1L4	Isoform 2 of Nucleosome assembly protein 1-like 4		sp|Q99733|NP1L4_HUMAN	1	0	MS/MS	STY:79.9663@EFIT(0.0149)GDVEPT(0.3284)DAES(0.3284)EWHS(0.3284)ENEEEEK;
EFITGDVEPTDAESEWHSENEEEEK	EFIT[79.9663]GDVEPTDAESEWHSENEEEEK	R	L	108	132	25	3	4T(79.9663)	sp|Q99733-2|NP1L4_HUMAN	Q99733-2	NP1L4_HUMAN	NAP1L4	Isoform 2 of Nucleosome assembly protein 1-like 4		sp|Q99733|NP1L4_HUMAN	1	3.9385796E7	MS/MS	STY:79.9663@EFIT(0.2500)GDVEPT(0.2500)DAES(0.2500)EWHS(0.2500)ENEEEEK;
EGAASPAPETPQPTSPETSPK	EGAAS[79.9663]PAPET[79.9663]PQPTSPETSPK	K	E	372	392	21	3	10T(79.9663),5S(79.9663)	sp|Q9Y3X0|CCDC9_HUMAN	Q9Y3X0	CCDC9_HUMAN	CCDC9	Coiled-coil domain-containing protein 9			1	2.00194e+06	MS/MS	STY:79.9663@EGAAS(0.3333)PAPET(0.3333)PQPT(0.3333)S(0.3333)PET(0.3333)S(0.3333)PK;
EGDVDVSDSDDEDDNLPANFDTCHR	EGDVDVS[79.9663]DS[79.9663]DDEDDNLPANFDTC[57.0215]HR	K	A	164	188	25	3	23C(57.0215),7S(79.9663),9S(79.9663)	sp|Q9NYV6-2|RRN3_HUMAN	Q9NYV6-2	RRN3_HUMAN	RRN3	Isoform 2 of RNA polymerase I-specific transcription initiation factor RRN3		sp|Q9NYV6-3|RRN3_HUMAN, sp|Q9NYV6-4|RRN3_HUMAN, sp|Q9NYV6|RRN3_HUMAN	1	0	MS/MS	STY:79.9663@EGDVDVS(0.6739)DS(0.6739)DDEDDNLPANFDT(0.6521)CHR;
EGEDGDQPTTPPKPLK	EGEDGDQPT[79.9663]TPPKPLK	K	T	174	189	16	2	9T(79.9663)	sp|P18858-2|DNLI1_HUMAN	P18858-2	DNLI1_HUMAN	LIG1	Isoform 2 of DNA ligase 1		sp|P18858-3|DNLI1_HUMAN, sp|P18858|DNLI1_HUMAN	1	0	MS/MS	STY:79.9663@EGEDGDQPT(0.6751)T(0.3249)PPKPLK;
EGEELGEGERPEEDAAALELSSDEAVEVEEVIEESR	EGEELGEGERPEEDAAALELS[79.9663]S[79.9663]DEAVEVEEVIEESR	K	A	182	217	36	3	21S(79.9663),22S(79.9663)	sp|Q6NZI2|CAVN1_HUMAN	Q6NZI2	CAVN1_HUMAN	CAVIN1	Caveolae-associated protein 1			2	1.7849232E7	MS/MS	STY:79.9663@EGEELGEGERPEEDAAALELS(0.9131)S(0.9131)DEAVEVEEVIEES(0.1738)R;
EGEEPTVYSDEEEPKDESAR	EGEEPTVYS[79.9663]DEEEPKDESAR	K	K	173	192	20	3	9S(79.9663)	sp|O00264|PGRC1_HUMAN	O00264	PGRC1_HUMAN	PGRMC1	Membrane-associated progesterone receptor component 1		sp|O00264-2|PGRC1_HUMAN	1	1.37549952E8	MS/MS	STY:79.9663@EGEEPT(0.0227)VY(0.0227)S(0.4773)DEEEPKDES(0.4773)AR;
EGEEPTVYSDEEEPK	EGEEPTVY[79.9663]SDEEEPK	K	D	173	187	15	2	8Y(79.9663)	sp|O00264|PGRC1_HUMAN	O00264	PGRC1_HUMAN	PGRMC1	Membrane-associated progesterone receptor component 1		sp|O00264-2|PGRC1_HUMAN	2	1.04292376E8	MS/MS	STY:79.9663@EGEEPT(0.0300)VY(0.9377)S(0.0322)DEEEPK;
EGEEPTVYSDEEEPKDESAR	EGEEPTVY[79.9663]SDEEEPKDESAR	K	K	173	192	20	2,3	8Y(79.9663)	sp|O00264|PGRC1_HUMAN	O00264	PGRC1_HUMAN	PGRMC1	Membrane-associated progesterone receptor component 1		sp|O00264-2|PGRC1_HUMAN	2	2.30248608E8	MS/MS	STY:79.9663@EGEEPT(0.0157)VY(0.4851)S(0.4851)DEEEPKDES(0.0141)AR;
EGEEPTVYSDEEEPKDESARK	EGEEPTVY[79.9663]SDEEEPKDESARK	K	N	173	193	21	3	8Y(79.9663)	sp|O00264|PGRC1_HUMAN	O00264	PGRC1_HUMAN	PGRMC1	Membrane-associated progesterone receptor component 1		sp|O00264-2|PGRC1_HUMAN	1	3.125603E7	MS/MS	STY:79.9663@EGEEPT(0.0717)VY(0.3906)S(0.3906)DEEEPKDES(0.1472)ARK;
EGEEPTVYSDEEEPK	EGEEPT[79.9663]VYSDEEEPK	K	D	173	187	15	2	6T(79.9663)	sp|O00264|PGRC1_HUMAN	O00264	PGRC1_HUMAN	PGRMC1	Membrane-associated progesterone receptor component 1		sp|O00264-2|PGRC1_HUMAN	2	1.02482256E8	MS/MS	STY:79.9663@EGEEPT(0.9060)VY(0.0615)S(0.0326)DEEEPK;
EGEEPTVYSDEEEPKDESAR	EGEEPT[79.9663]VYSDEEEPKDESAR	K	K	173	192	20	2,3	6T(79.9663)	sp|O00264|PGRC1_HUMAN	O00264	PGRC1_HUMAN	PGRMC1	Membrane-associated progesterone receptor component 1		sp|O00264-2|PGRC1_HUMAN	4	2.4202384E8	MS/MS	STY:79.9663@EGEEPT(0.7304)VY(0.0643)S(0.0643)DEEEPKDES(0.1411)AR;
EGEEPTVYSDEEEPKDESARK	EGEEPT[79.9663]VYSDEEEPKDESARK	K	N	173	193	21	3	6T(79.9663)	sp|O00264|PGRC1_HUMAN	O00264	PGRC1_HUMAN	PGRMC1	Membrane-associated progesterone receptor component 1		sp|O00264-2|PGRC1_HUMAN	4	4.385466E7	MS/MS	STY:79.9663@EGEEPT(0.3304)VY(0.3304)S(0.3304)DEEEPKDES(0.0089)ARK;
EGEETEGSEEDDKENDKTEEMPNDSVLENK	EGEETEGSEEDDKENDKT[79.9663]EEM[15.9949]PNDS[79.9663]VLENK	K	S	475	504	30	3	18T(79.9663),21M(15.9949),25S(79.9663)	sp|P49321-3|NASP_HUMAN	P49321-3	NASP_HUMAN	NASP	Isoform 3 of Nuclear autoantigenic sperm protein		sp|P49321-4|NASP_HUMAN, sp|P49321|NASP_HUMAN	1	9136124	MS/MS	STY:79.9663@EGEET(0.1341)EGS(0.1341)EEDDKENDKT(0.8677)EEMPNDS(0.8641)VLENK;M:15.9949@EGEETEGSEEDDKENDKTEEM(1.0000)PNDSVLENK;
EGEETEGSEEDDKENDKTEEMPNDSVLENK	EGEETEGS[79.9663]EEDDKENDKT[79.9663]EEMPNDSVLENK	K	S	475	504	30	3	18T(79.9663),8S(79.9663)	sp|P49321-3|NASP_HUMAN	P49321-3	NASP_HUMAN	NASP	Isoform 3 of Nuclear autoantigenic sperm protein		sp|P49321-4|NASP_HUMAN, sp|P49321|NASP_HUMAN	1	4.8519516E7	MS/MS	STY:79.9663@EGEET(0.1873)EGS(0.9008)EEDDKENDKT(0.8519)EEMPNDS(0.0600)VLENK;
EGEETEGSEEDDKENDKTEEMPNDSVLENK	EGEET[79.9663]EGSEEDDKENDKTEEMPNDSVLENK	K	S	475	504	30	3	5T(79.9663)	sp|P49321-3|NASP_HUMAN	P49321-3	NASP_HUMAN	NASP	Isoform 3 of Nuclear autoantigenic sperm protein		sp|P49321-4|NASP_HUMAN, sp|P49321|NASP_HUMAN	1	7.63919e+06	MS/MS	STY:79.9663@EGEET(0.5950)EGS(0.1185)EEDDKENDKT(0.1185)EEMPNDS(0.1681)VLENK;
EGEETEGSEEDDKENDKTEEMPNDSVLENK	EGEET[79.9663]EGSEEDDKENDKTEEM[15.9949]PNDS[79.9663]VLENK	K	S	475	504	30	3	21M(15.9949),25S(79.9663),5T(79.9663)	sp|P49321-3|NASP_HUMAN	P49321-3	NASP_HUMAN	NASP	Isoform 3 of Nuclear autoantigenic sperm protein		sp|P49321-4|NASP_HUMAN, sp|P49321|NASP_HUMAN	1	0	MS/MS	STY:79.9663@EGEET(0.4896)EGS(0.4896)EEDDKENDKT(0.4896)EEMPNDS(0.5313)VLENK;M:15.9949@EGEETEGSEEDDKENDKTEEM(1.0000)PNDSVLENK;
EGEETEGSEEDDKENDKTEEMPNDSVLENK	EGEET[79.9663]EGSEEDDKENDKT[79.9663]EEMPNDSVLENK	K	S	475	504	30	3	18T(79.9663),5T(79.9663)	sp|P49321-3|NASP_HUMAN	P49321-3	NASP_HUMAN	NASP	Isoform 3 of Nuclear autoantigenic sperm protein		sp|P49321-4|NASP_HUMAN, sp|P49321|NASP_HUMAN	1	4.0536636E7	MS/MS	STY:79.9663@EGEET(0.6214)EGS(0.6214)EEDDKENDKT(0.6482)EEMPNDS(0.1089)VLENK;
EGEETEGSEEDDK	EGEET[79.9663]EGS[79.9663]EEDDK	K	E	475	487	13	2	5T(79.9663),8S(79.9663)	sp|P49321-3|NASP_HUMAN	P49321-3	NASP_HUMAN	NASP	Isoform 3 of Nuclear autoantigenic sperm protein		sp|P49321-4|NASP_HUMAN, sp|P49321|NASP_HUMAN	1	0	MS/MS	STY:79.9663@EGEET(1.0000)EGS(1.0000)EEDDK;
EGEETEGSEEDDKENDKTEEMPNDSVLENK	EGEET[79.9663]EGS[79.9663]EEDDKENDKTEEMPNDSVLENK	K	S	475	504	30	3,4	5T(79.9663),8S(79.9663)	sp|P49321-3|NASP_HUMAN	P49321-3	NASP_HUMAN	NASP	Isoform 3 of Nuclear autoantigenic sperm protein		sp|P49321-4|NASP_HUMAN, sp|P49321|NASP_HUMAN	9	1.003622E8	MS/MS	STY:79.9663@EGEET(0.8958)EGS(0.8958)EEDDKENDKT(0.1385)EEMPNDS(0.0698)VLENK;
EGESPAAGPPPQELVEEEPSAPPTLLEEETEDGSDK	EGESPAAGPPPQELVEEEPS[79.9663]APPTLLEEETEDGSDK	R	V	1040	1075	36	3	20S(79.9663)	sp|Q8IZL8|PELP1_HUMAN	Q8IZL8	PELP1_HUMAN	PELP1	Proline-, glutamic acid- and leucine-rich protein 1			1	6174880	MS/MS	STY:79.9663@EGES(0.0322)PAAGPPPQELVEEEPS(0.6886)APPT(0.0306)LLEEET(0.1243)EDGS(0.1243)DK;
EGETQGVAFEHESPADFQNSQSPVQDQDK	EGETQGVAFEHESPADFQNSQS[79.9663]PVQDQDK	R	S	341	369	29	3	22S(79.9663)	sp|P78332-3|RBM6_HUMAN	P78332-3	RBM6_HUMAN	RBM6	Isoform 3 of RNA-binding protein 6		sp|P78332|RBM6_HUMAN	1	1.335258E7	MS/MS	STY:79.9663@EGET(0.0348)QGVAFEHES(0.0310)PADFQNS(0.0310)QS(0.9031)PVQDQDK;
EGGGDSSASSPTEEEQEQGEIGACSDEGTAQEGK	EGGGDS[79.9663]SASSPTEEEQEQGEIGAC[57.0215]SDEGTAQEGK	K	A	111	144	34	3	24C(57.0215),6S(79.9663)	sp|P49006|MRP_HUMAN	P49006	MRP_HUMAN	MARCKSL1	MARCKS-related protein			1	2324349	MS/MS	STY:79.9663@EGGGDS(0.1974)S(0.1974)AS(0.1974)S(0.1974)PT(0.1974)EEEQEQGEIGACS(0.0066)DEGT(0.0066)AQEGK;
EGGSKSDSEDITR	EGGS[79.9663]KSDSEDITR	R	S	189	201	13	2	4S(79.9663)	sp|O00470-2|MEIS1_HUMAN	O00470-2	MEIS1_HUMAN	MEIS1	Isoform 2 of Homeobox protein Meis1		sp|O00470|MEIS1_HUMAN	1	2.07924e+06	MS/MS	STY:79.9663@EGGS(0.2500)KS(0.2500)DS(0.2500)EDIT(0.2500)R;
EGHSLEMENENLVENGADSDEDDNSFLK	EGHSLEMENENLVENGADSDEDDNS[79.9663]FLK	K	Q	508	535	28	3	25S(79.9663)	sp|Q9UHB6-2|LIMA1_HUMAN	Q9UHB6-2	LIMA1_HUMAN	LIMA1	Isoform Alpha of LIM domain and actin-binding protein 1		sp|Q9UHB6-3|LIMA1_HUMAN, sp|Q9UHB6-4|LIMA1_HUMAN, sp|Q9UHB6-5|LIMA1_HUMAN, sp|Q9UHB6|LIMA1_HUMAN	4	1.36608688E8	MS/MS	STY:79.9663@EGHS(0.0301)LEMENENLVENGADS(0.0322)DEDDNS(0.9377)FLK;
EGHSLEMENENLVENGADSDEDDNSFLK	EGHSLEMENENLVENGADS[79.9663]DEDDNSFLK	K	Q	508	535	28	3	19S(79.9663)	sp|Q9UHB6-2|LIMA1_HUMAN	Q9UHB6-2	LIMA1_HUMAN	LIMA1	Isoform Alpha of LIM domain and actin-binding protein 1		sp|Q9UHB6-3|LIMA1_HUMAN, sp|Q9UHB6-4|LIMA1_HUMAN, sp|Q9UHB6-5|LIMA1_HUMAN, sp|Q9UHB6|LIMA1_HUMAN	11	1.60826464E8	MS/MS	STY:79.9663@EGHS(0.0586)LEMENENLVENGADS(0.8836)DEDDNS(0.0578)FLK;
EGHSLEMENENLVENGADSDEDDNSFLK	EGHSLEM[15.9949]ENENLVENGADSDEDDNS[79.9663]FLK	K	Q	508	535	28	3	25S(79.9663),7M(15.9949)	sp|Q9UHB6-2|LIMA1_HUMAN	Q9UHB6-2	LIMA1_HUMAN	LIMA1	Isoform Alpha of LIM domain and actin-binding protein 1		sp|Q9UHB6-3|LIMA1_HUMAN, sp|Q9UHB6-4|LIMA1_HUMAN, sp|Q9UHB6-5|LIMA1_HUMAN, sp|Q9UHB6|LIMA1_HUMAN	2	1.3000548E7	MS/MS	STY:79.9663@EGHS(0.0310)LEMENENLVENGADS(0.0657)DEDDNS(0.9033)FLK;M:15.9949@EGHSLEM(1.0000)ENENLVENGADSDEDDNSFLK;
EGHSLEMENENLVENGADSDEDDNSFLK	EGHSLEM[15.9949]ENENLVENGADS[79.9663]DEDDNSFLK	K	Q	508	535	28	3	19S(79.9663),7M(15.9949)	sp|Q9UHB6-2|LIMA1_HUMAN	Q9UHB6-2	LIMA1_HUMAN	LIMA1	Isoform Alpha of LIM domain and actin-binding protein 1		sp|Q9UHB6-3|LIMA1_HUMAN, sp|Q9UHB6-4|LIMA1_HUMAN, sp|Q9UHB6-5|LIMA1_HUMAN, sp|Q9UHB6|LIMA1_HUMAN	6	7.7312392E7	MS/MS	STY:79.9663@EGHS(0.0815)LEMENENLVENGADS(0.8822)DEDDNS(0.0364)FLK;M:15.9949@EGHSLEM(1.0000)ENENLVENGADSDEDDNSFLK;
EGHSLEMENENLVENGADSDEDDNSFLK	EGHS[79.9663]LEMENENLVENGADSDEDDNSFLK	K	Q	508	535	28	3	4S(79.9663)	sp|Q9UHB6-2|LIMA1_HUMAN	Q9UHB6-2	LIMA1_HUMAN	LIMA1	Isoform Alpha of LIM domain and actin-binding protein 1		sp|Q9UHB6-3|LIMA1_HUMAN, sp|Q9UHB6-4|LIMA1_HUMAN, sp|Q9UHB6-5|LIMA1_HUMAN, sp|Q9UHB6|LIMA1_HUMAN	1	0	MS/MS	STY:79.9663@EGHS(0.3568)LEMENENLVENGADS(0.3216)DEDDNS(0.3216)FLK;
EGHSLEMENENLVENGADSDEDDNSFLK	EGHS[79.9663]LEM[15.9949]ENENLVENGADSDEDDNSFLK	K	Q	508	535	28	3	4S(79.9663),7M(15.9949)	sp|Q9UHB6-2|LIMA1_HUMAN	Q9UHB6-2	LIMA1_HUMAN	LIMA1	Isoform Alpha of LIM domain and actin-binding protein 1		sp|Q9UHB6-3|LIMA1_HUMAN, sp|Q9UHB6-4|LIMA1_HUMAN, sp|Q9UHB6-5|LIMA1_HUMAN, sp|Q9UHB6|LIMA1_HUMAN	1	0	MS/MS	STY:79.9663@EGHS(0.4013)LEMENENLVENGADS(0.3104)DEDDNS(0.2884)FLK;M:15.9949@EGHSLEM(1.0000)ENENLVENGADSDEDDNSFLK;
EGITGPPADSSKPIGPDDAIDALSSDFTCGSPTAAGK	EGITGPPADSSKPIGPDDAIDALSS[79.9663]DFTC[57.0215]GSPTAAGK	K	K	274	310	37	3	25S(79.9663),29C(57.0215)	sp|P20810-10|ICAL_HUMAN	P20810-10	ICAL_HUMAN	CAST	Isoform 10 of Calpastatin		sp|P20810-4|ICAL_HUMAN, sp|P20810-6|ICAL_HUMAN, sp|P20810-7|ICAL_HUMAN, sp|P20810-8|ICAL_HUMAN, sp|P20810-9|ICAL_HUMAN, sp|P20810|ICAL_HUMAN	1	3.2458468E7	MS/MS	STY:79.9663@EGIT(0.1873)GPPADS(0.1873)S(0.1873)KPIGPDDAIDALS(0.0389)S(0.3543)DFT(0.0346)CGS(0.0051)PT(0.0051)AAGK;
EGITGPPADSSKPIGPDDAIDALSSDFTCGSPTAAGK	EGITGPPADSS[79.9663]KPIGPDDAIDALSSDFTC[57.0215]GSPTAAGK	K	K	274	310	37	3	11S(79.9663),29C(57.0215)	sp|P20810-10|ICAL_HUMAN	P20810-10	ICAL_HUMAN	CAST	Isoform 10 of Calpastatin		sp|P20810-4|ICAL_HUMAN, sp|P20810-6|ICAL_HUMAN, sp|P20810-7|ICAL_HUMAN, sp|P20810-8|ICAL_HUMAN, sp|P20810-9|ICAL_HUMAN, sp|P20810|ICAL_HUMAN	1	3.2458468E7	MS/MS	STY:79.9663@EGIT(0.0587)GPPADS(0.0253)S(0.5841)KPIGPDDAIDALS(0.0469)S(0.0469)DFT(0.0262)CGS(0.0262)PT(0.1857)AAGK;
EGKPEIEGKPESEGEPGSETR	EGKPEIEGKPES[79.9663]EGEPGSETR	R	A	234	254	21	3	12S(79.9663)	sp|Q96EI5-2|TCAL4_HUMAN	Q96EI5-2	TCAL4_HUMAN	TCEAL4	Isoform 2 of Transcription elongation factor A protein-like 4		sp|Q96EI5|TCAL4_HUMAN	1	0	MS/MS	STY:79.9663@EGKPEIEGKPES(0.4916)EGEPGS(0.2542)ET(0.2542)R;
EGLRPGDTTSTFCGTPNYIAPEILR	EGLRPGDTTSTFC[57.0215]GT[79.9663]PNYIAPEILR	K	G	402	426	25	3	13C(57.0215),15T(79.9663)	sp|P41743|KPCI_HUMAN	P41743	KPCI_HUMAN	PRKCI	Protein kinase C iota type			1	0	MS/MS	STY:79.9663@EGLRPGDT(0.0505)T(0.0505)S(0.0505)T(0.1102)FCGT(0.3692)PNY(0.3692)IAPEILR;
EGLRPGDTTSTFCGTPNYIAPEILR	EGLRPGDT[79.9663]TSTFC[57.0215]GTPNYIAPEILR	K	G	402	426	25	3	13C(57.0215),8T(79.9663)	sp|P41743|KPCI_HUMAN	P41743	KPCI_HUMAN	PRKCI	Protein kinase C iota type			1	0	MS/MS	STY:79.9663@EGLRPGDT(0.1667)T(0.1667)S(0.1667)T(0.1667)FCGT(0.1667)PNY(0.1667)IAPEILR;
EGMNPSYDEYADSDEDQHDAYLER	EGMNPSYDEYADSDEDQHDAY[79.9663]LER	K	M	432	455	24	3	21Y(79.9663)	sp|Q08945|SSRP1_HUMAN	Q08945	SSRP1_HUMAN	SSRP1	FACT complex subunit SSRP1			3	3.69595136E8	MS/MS	STY:79.9663@EGMNPS(0.0222)Y(0.0222)DEY(0.0264)ADS(0.0685)DEDQHDAY(0.8607)LER;
EGMNPSYDEYADSDEDQHDAYLER	EGMNPSYDEYADS[79.9663]DEDQHDAYLER	K	M	432	455	24	3	13S(79.9663)	sp|Q08945|SSRP1_HUMAN	Q08945	SSRP1_HUMAN	SSRP1	FACT complex subunit SSRP1			6	3.69595136E8	MS/MS	STY:79.9663@EGMNPS(0.0219)Y(0.0155)DEY(0.0155)ADS(0.9313)DEDQHDAY(0.0157)LER;
EGMNPSYDEYADSDEDQHDAYLER	EGMNPSYDEY[79.9663]ADS[79.9663]DEDQHDAYLER	K	M	432	455	24	3	10Y(79.9663),13S(79.9663)	sp|Q08945|SSRP1_HUMAN	Q08945	SSRP1_HUMAN	SSRP1	FACT complex subunit SSRP1			1	8.19191e+06	MS/MS	STY:79.9663@EGMNPS(0.0658)Y(0.0658)DEY(0.9118)ADS(0.9133)DEDQHDAY(0.0434)LER;
EGMNPSYDEYADSDEDQHDAYLER	EGMNPS[79.9663]YDEYADSDEDQHDAYLER	K	M	432	455	24	3	6S(79.9663)	sp|Q08945|SSRP1_HUMAN	Q08945	SSRP1_HUMAN	SSRP1	FACT complex subunit SSRP1			4	9378216	MS/MS	STY:79.9663@EGMNPS(0.3553)Y(0.3553)DEY(0.1073)ADS(0.1073)DEDQHDAY(0.0748)LER;
EGMNPSYDEYADSDEDQHDAYLER	EGMNPS[79.9663]Y[79.9663]DEYADSDEDQHDAYLER	K	M	432	455	24	3	6S(79.9663),7Y(79.9663)	sp|Q08945|SSRP1_HUMAN	Q08945	SSRP1_HUMAN	SSRP1	FACT complex subunit SSRP1			2	8.19191e+06	MS/MS	STY:79.9663@EGMNPS(0.4914)Y(0.4914)DEY(0.4914)ADS(0.4914)DEDQHDAY(0.0344)LER;
EGMNPSYDEYADSDEDQHDAYLER	EGM[15.9949]NPSYDEYADSDEDQHDAY[79.9663]LER	K	M	432	455	24	3	21Y(79.9663),3M(15.9949)	sp|Q08945|SSRP1_HUMAN	Q08945	SSRP1_HUMAN	SSRP1	FACT complex subunit SSRP1			1	8.89108E7	MS/MS	STY:79.9663@EGMNPS(0.0210)Y(0.0210)DEY(0.0210)ADS(0.0267)DEDQHDAY(0.9104)LER;M:15.9949@EGM(1.0000)NPSYDEYADSDEDQHDAYLER;
EGMNPSYDEYADSDEDQHDAYLER	EGM[15.9949]NPSYDEYADS[79.9663]DEDQHDAYLER	K	M	432	455	24	3	13S(79.9663),3M(15.9949)	sp|Q08945|SSRP1_HUMAN	Q08945	SSRP1_HUMAN	SSRP1	FACT complex subunit SSRP1			6	1.21128864E8	MS/MS	STY:79.9663@EGMNPS(0.0174)Y(0.0174)DEY(0.0179)ADS(0.9308)DEDQHDAY(0.0165)LER;M:15.9949@EGM(1.0000)NPSYDEYADSDEDQHDAYLER;
EGMNPSYDEYADSDEDQHDAYLER	EGM[15.9949]NPSYDEY[79.9663]ADSDEDQHDAYLER	K	M	432	455	24	3	10Y(79.9663),3M(15.9949)	sp|Q08945|SSRP1_HUMAN	Q08945	SSRP1_HUMAN	SSRP1	FACT complex subunit SSRP1			1	3.2218064E7	MS/MS	STY:79.9663@EGMNPS(0.0430)Y(0.0430)DEY(0.6281)ADS(0.2733)DEDQHDAY(0.0126)LER;M:15.9949@EGM(1.0000)NPSYDEYADSDEDQHDAYLER;
EGMNPSYDEYADSDEDQHDAYLER	EGM[15.9949]NPS[79.9663]YDEYADSDEDQHDAYLER	K	M	432	455	24	3	3M(15.9949),6S(79.9663)	sp|Q08945|SSRP1_HUMAN	Q08945	SSRP1_HUMAN	SSRP1	FACT complex subunit SSRP1			6	3.2218064E7	MS/MS	STY:79.9663@EGMNPS(0.8012)Y(0.0183)DEY(0.0183)ADS(0.0183)DEDQHDAY(0.1439)LER;M:15.9949@EGM(1.0000)NPSYDEYADSDEDQHDAYLER;
EGMNPSYDEYADSDEDQHDAYLER	EGM[15.9949]NPS[79.9663]Y[79.9663]DEYADSDEDQHDAYLER	K	M	432	455	24	3	3M(15.9949),6S(79.9663),7Y(79.9663)	sp|Q08945|SSRP1_HUMAN	Q08945	SSRP1_HUMAN	SSRP1	FACT complex subunit SSRP1			1	0	MS/MS	STY:79.9663@EGMNPS(0.4000)Y(0.4000)DEY(0.4000)ADS(0.4000)DEDQHDAY(0.4000)LER;M:15.9949@EGM(1.0000)NPSYDEYADSDEDQHDAYLER;
EGNTTEDDFPSSPGNGNK	EGNTTEDDFPS[79.9663]SPGNGNK	R	S	295	312	18	2	11S(79.9663)	sp|Q15007|FL2D_HUMAN	Q15007	FL2D_HUMAN	WTAP	Pre-mRNA-splicing regulator WTAP			1	1.0592767E7	MS/MS	STY:79.9663@EGNT(0.1168)T(0.1168)EDDFPS(0.7442)S(0.0221)PGNGNK;
EGSEFSFSDGEVAEK	EGSEFS[79.9663]FS[79.9663]DGEVAEK	K	A	330	344	15	2	6S(79.9663),8S(79.9663)	sp|Q9BVS4-2|RIOK2_HUMAN	Q9BVS4-2	RIOK2_HUMAN	RIOK2	Isoform 2 of Serine/threonine-protein kinase RIO2		sp|Q9BVS4|RIOK2_HUMAN	1	5.89443e+06	MS/MS	STY:79.9663@EGS(0.5563)EFS(0.7219)FS(0.7219)DGEVAEK;
EGSEFSFSDGEVAEK	EGS[79.9663]EFSFS[79.9663]DGEVAEK	K	A	330	344	15	2	3S(79.9663),8S(79.9663)	sp|Q9BVS4-2|RIOK2_HUMAN	Q9BVS4-2	RIOK2_HUMAN	RIOK2	Isoform 2 of Serine/threonine-protein kinase RIO2		sp|Q9BVS4|RIOK2_HUMAN	1	5.89443e+06	MS/MS	STY:79.9663@EGS(0.6571)EFS(0.6571)FS(0.6858)DGEVAEK;
EGSPANWK	EGS[79.9663]PANWK	R	R	189	196	8	2	3S(79.9663)	sp|O96019-2|ACL6A_HUMAN	O96019-2	ACL6A_HUMAN	ACTL6A	Isoform 2 of Actin-like protein 6A		sp|O96019|ACL6A_HUMAN	1	0	MS/MS	STY:79.9663@EGS(1.0000)PANWK;
EGSPIPHDPEFGSK	EGS[79.9663]PIPHDPEFGSK	R	L	280	293	14	2	3S(79.9663)	sp|P85037-2|FOXK1_HUMAN	P85037-2	FOXK1_HUMAN	FOXK1	Isoform 2 of Forkhead box protein K1		sp|P85037|FOXK1_HUMAN	3	1.0604714E7	MS/MS	STY:79.9663@EGS(0.9254)PIPHDPEFGS(0.0746)K;
EGSPRDNPTAQQIMQLLR	EGS[79.9663]PRDNPTAQQIMQLLR	R	E	569	586	18	3	3S(79.9663)	sp|Q08379-2|GOGA2_HUMAN	Q08379-2	GOGA2_HUMAN	GOLGA2	Isoform 2 of Golgin subfamily A member 2		sp|Q08379|GOGA2_HUMAN	1	0	MS/MS	STY:79.9663@EGS(0.5000)PRDNPT(0.5000)AQQIMQLLR;
EGTHATCASEEGGTESSESGSSLQPLSADSTPDVNQSPR	EGTHAT[79.9663]C[57.0215]ASEEGGTESSESGSSLQPLSADSTPDVNQSPR	K	G	120	158	39	3	6T(79.9663),7C(57.0215)	sp|Q8WXG6-2|MADD_HUMAN	Q8WXG6-2	MADD_HUMAN	MADD	Isoform 2 of MAP kinase-activating death domain protein		sp|Q8WXG6-3|MADD_HUMAN, sp|Q8WXG6-4|MADD_HUMAN, sp|Q8WXG6-5|MADD_HUMAN, sp|Q8WXG6-6|MADD_HUMAN, sp|Q8WXG6-7|MADD_HUMAN, sp|Q8WXG6-8|MADD_HUMAN, sp|Q8WXG6|MADD_HUMAN	1	0	MS/MS	STY:79.9663@EGT(0.0562)HAT(0.3817)CAS(0.3817)EEGGT(0.0180)ES(0.0180)S(0.0180)ES(0.0180)GS(0.0180)S(0.0180)LQPLS(0.0180)ADS(0.0180)T(0.0180)PDVNQS(0.0180)PR;
EHASSCPPSITNSMVDIPIVLINGCPEPGSSPPQR	EHASSC[57.0215]PPSITNSMVDIPIVLINGC[57.0215]PEPGS[79.9663]SPPQR	K	T	356	390	35	3	25C(57.0215),30S(79.9663),6C(57.0215)	sp|Q8IZW8|TENS4_HUMAN	Q8IZW8	TENS4_HUMAN	TNS4	Tensin-4			1	1.2236764E7	MS/MS	STY:79.9663@EHAS(0.0198)S(0.0198)CPPS(0.0198)IT(0.0198)NS(0.0232)MVDIPIVLINGCPEPGS(0.4489)S(0.4489)PPQR;
EHHPEEGSSGSEVEEIPETPCESQGEELK	EHHPEEGS[79.9663]SGSEVEEIPET[79.9663]PC[57.0215]ES[79.9663]QGEELK	K	E	657	685	29	3	19T(79.9663),21C(57.0215),23S(79.9663),8S(79.9663)	sp|Q12888-2|TP53B_HUMAN	Q12888-2	TP53B_HUMAN	TP53BP1	Isoform 2 of TP53-binding protein 1		sp|Q12888-3|TP53B_HUMAN, sp|Q12888|TP53B_HUMAN	1	7160899	MS/MS	STY:79.9663@EHHPEEGS(0.5865)S(0.5865)GS(0.5865)EVEEIPET(0.6202)PCES(0.6202)QGEELK;
EHHPEEGSSGSEVEEIPETPCESQGEELK	EHHPEEGS[79.9663]S[79.9663]GS[79.9663]EVEEIPETPC[57.0215]ESQGEELK	K	E	657	685	29	3	11S(79.9663),21C(57.0215),8S(79.9663),9S(79.9663)	sp|Q12888-2|TP53B_HUMAN	Q12888-2	TP53B_HUMAN	TP53BP1	Isoform 2 of TP53-binding protein 1		sp|Q12888-3|TP53B_HUMAN, sp|Q12888|TP53B_HUMAN	3	7160899	MS/MS	STY:79.9663@EHHPEEGS(0.8490)S(0.8490)GS(0.8490)EVEEIPET(0.2560)PCES(0.1970)QGEELK;
EHYPVSSPSSPSPPAQPGGVSR	EHYPVSSPSSPS[79.9663]PPAQPGGVS[79.9663]R	K	N	2035	2056	22	3	12S(79.9663),21S(79.9663)	sp|O75179-2|ANR17_HUMAN	O75179-2	ANR17_HUMAN	ANKRD17	Isoform 2 of Ankyrin repeat domain-containing protein 17		sp|O75179-4|ANR17_HUMAN, sp|O75179-6|ANR17_HUMAN, sp|O75179-7|ANR17_HUMAN, sp|O75179|ANR17_HUMAN	1	0	MS/MS	STY:79.9663@EHY(0.0791)PVS(0.0850)S(0.0850)PS(0.2839)S(0.2839)PS(0.5916)PPAQPGGVS(0.5916)R;
EHYPVSSPSSPSPPAQPGGVSR	EHYPVSSPS[79.9663]S[79.9663]PSPPAQPGGVSR	K	N	2035	2056	22	3	10S(79.9663),9S(79.9663)	sp|O75179-2|ANR17_HUMAN	O75179-2	ANR17_HUMAN	ANKRD17	Isoform 2 of Ankyrin repeat domain-containing protein 17		sp|O75179-4|ANR17_HUMAN, sp|O75179-6|ANR17_HUMAN, sp|O75179-7|ANR17_HUMAN, sp|O75179|ANR17_HUMAN	1	7.38358e+06	MS/MS	STY:79.9663@EHY(0.0772)PVS(0.0772)S(0.0772)PS(0.5764)S(0.5764)PS(0.5764)PPAQPGGVS(0.0395)R;
EHYPVSSPSSPSPPAQPGGVSR	EHYPVS[79.9663]S[79.9663]PSSPSPPAQPGGVSR	K	N	2035	2056	22	3	6S(79.9663),7S(79.9663)	sp|O75179-2|ANR17_HUMAN	O75179-2	ANR17_HUMAN	ANKRD17	Isoform 2 of Ankyrin repeat domain-containing protein 17		sp|O75179-4|ANR17_HUMAN, sp|O75179-6|ANR17_HUMAN, sp|O75179-7|ANR17_HUMAN, sp|O75179|ANR17_HUMAN	1	7.38358e+06	MS/MS	STY:79.9663@EHY(0.0565)PVS(0.4119)S(0.4119)PS(0.4119)S(0.4119)PS(0.1480)PPAQPGGVS(0.1480)R;
EHYPVSSPSSPSPPAQPGGVSR	EHY[79.9663]PVS[79.9663]SPSSPSPPAQPGGVSR	K	N	2035	2056	22	3	3Y(79.9663),6S(79.9663)	sp|O75179-2|ANR17_HUMAN	O75179-2	ANR17_HUMAN	ANKRD17	Isoform 2 of Ankyrin repeat domain-containing protein 17		sp|O75179-4|ANR17_HUMAN, sp|O75179-6|ANR17_HUMAN, sp|O75179-7|ANR17_HUMAN, sp|O75179|ANR17_HUMAN	2	7.38358e+06	MS/MS	STY:79.9663@EHY(0.3314)PVS(0.3314)S(0.3314)PS(0.3314)S(0.3314)PS(0.3314)PPAQPGGVS(0.0114)R;
EHYPVSSPSSPSPPAQPGGVSR	EHY[79.9663]PVS[79.9663]S[79.9663]PSSPSPPAQPGGVSR	K	N	2035	2056	22	3	3Y(79.9663),6S(79.9663),7S(79.9663)	sp|O75179-2|ANR17_HUMAN	O75179-2	ANR17_HUMAN	ANKRD17	Isoform 2 of Ankyrin repeat domain-containing protein 17		sp|O75179-4|ANR17_HUMAN, sp|O75179-6|ANR17_HUMAN, sp|O75179-7|ANR17_HUMAN, sp|O75179|ANR17_HUMAN	1	0	MS/MS	STY:79.9663@EHY(0.4901)PVS(0.4901)S(0.4901)PS(0.4901)S(0.4901)PS(0.4901)PPAQPGGVS(0.0595)R;
EIAIVHSDAEK	EIAIVHS[79.9663]DAEK	K	E	341	351	11	2	7S(79.9663)	sp|Q9H307|PININ_HUMAN	Q9H307	PININ_HUMAN	PNN	Pinin			2	4.6320036E7	MS/MS	STY:79.9663@EIAIVHS(1.0000)DAEK;
EIAIVHSDAEKEQEEEEQK	EIAIVHS[79.9663]DAEKEQEEEEQK	K	Q	341	359	19	3	7S(79.9663)	sp|Q9H307|PININ_HUMAN	Q9H307	PININ_HUMAN	PNN	Pinin			2	1.1958588E7	MS/MS	STY:79.9663@EIAIVHS(1.0000)DAEKEQEEEEQK;
EIPEDVDMEEEKESEDSDEENDFTEK	EIPEDVDMEEEKESEDS[79.9663]DEENDFT[79.9663]EK	K	V	766	791	26	3	17S(79.9663),24T(79.9663)	sp|Q8IWA0|WDR75_HUMAN	Q8IWA0	WDR75_HUMAN	WDR75	WD repeat-containing protein 75			2	8.4089224E7	MS/MS	STY:79.9663@EIPEDVDMEEEKES(0.1540)EDS(0.9230)DEENDFT(0.9230)EK;
EIPEDVDMEEEKESEDSDEENDFTEK	EIPEDVDMEEEKES[79.9663]EDSDEENDFT[79.9663]EK	K	V	766	791	26	3	14S(79.9663),24T(79.9663)	sp|Q8IWA0|WDR75_HUMAN	Q8IWA0	WDR75_HUMAN	WDR75	WD repeat-containing protein 75			1	8.342092E7	MS/MS	STY:79.9663@EIPEDVDMEEEKES(0.6570)EDS(0.6570)DEENDFT(0.6860)EK;
EIPEDVDMEEEKESEDSDEENDFTEK	EIPEDVDMEEEKES[79.9663]EDS[79.9663]DEENDFTEK	K	V	766	791	26	3	14S(79.9663),17S(79.9663)	sp|Q8IWA0|WDR75_HUMAN	Q8IWA0	WDR75_HUMAN	WDR75	WD repeat-containing protein 75			4	8.4089224E7	MS/MS	STY:79.9663@EIPEDVDMEEEKES(0.9349)EDS(0.9349)DEENDFT(0.1302)EK;
EIPEDVDMEEEKESEDSDEENDFTEK	EIPEDVDM[15.9949]EEEKES[79.9663]EDS[79.9663]DEENDFTEK	K	V	766	791	26	3	14S(79.9663),17S(79.9663),8M(15.9949)	sp|Q8IWA0|WDR75_HUMAN	Q8IWA0	WDR75_HUMAN	WDR75	WD repeat-containing protein 75			1	1.5213172E7	MS/MS	STY:79.9663@EIPEDVDMEEEKES(0.9184)EDS(0.9182)DEENDFT(0.1634)EK;M:15.9949@EIPEDVDM(1.0000)EEEKESEDSDEENDFTEK;
EIPSATQSPISK	EIPSATQSPIS[79.9663]K	K	K	1156	1167	12	2	11S(79.9663)	sp|Q9BQG0-2|MBB1A_HUMAN	Q9BQG0-2	MBB1A_HUMAN	MYBBP1A	Isoform 2 of Myb-binding protein 1A		sp|Q9BQG0|MBB1A_HUMAN	1	7513943	MS/MS	STY:79.9663@EIPS(0.0463)AT(0.2703)QS(0.2703)PIS(0.4131)K;
EIPSATQSPISK	EIPSAT[79.9663]QSPISK	K	K	1156	1167	12	2	6T(79.9663)	sp|Q9BQG0-2|MBB1A_HUMAN	Q9BQG0-2	MBB1A_HUMAN	MYBBP1A	Isoform 2 of Myb-binding protein 1A		sp|Q9BQG0|MBB1A_HUMAN	1	9934997	MS/MS	STY:79.9663@EIPS(0.0155)AT(0.3282)QS(0.3282)PIS(0.3282)K;
EIPSATQSPISK	EIPS[79.9663]ATQSPISK	K	K	1156	1167	12	2	4S(79.9663)	sp|Q9BQG0-2|MBB1A_HUMAN	Q9BQG0-2	MBB1A_HUMAN	MYBBP1A	Isoform 2 of Myb-binding protein 1A		sp|Q9BQG0|MBB1A_HUMAN	1	7513943	MS/MS	STY:79.9663@EIPS(0.2910)AT(0.2910)QS(0.2910)PIS(0.1271)K;
EIQNGNLHESDSESVPR	EIQNGNLHESDS[79.9663]ESVPR	K	D	66	82	17	2,3	12S(79.9663)	sp|Q86UP2-2|KTN1_HUMAN	Q86UP2-2	KTN1_HUMAN	KTN1	Isoform 2 of Kinectin		sp|Q86UP2-3|KTN1_HUMAN, sp|Q86UP2-4|KTN1_HUMAN, sp|Q86UP2|KTN1_HUMAN	5	4.64567E7	MS/MS	STY:79.9663@EIQNGNLHES(0.0473)DS(0.9194)ES(0.0333)VPR;
EIQNGNLHESDSESVPR	EIQNGNLHES[79.9663]DSESVPR	K	D	66	82	17	2,3	10S(79.9663)	sp|Q86UP2-2|KTN1_HUMAN	Q86UP2-2	KTN1_HUMAN	KTN1	Isoform 2 of Kinectin		sp|Q86UP2-3|KTN1_HUMAN, sp|Q86UP2-4|KTN1_HUMAN, sp|Q86UP2|KTN1_HUMAN	7	4.6489084E7	MS/MS	STY:79.9663@EIQNGNLHES(0.9304)DS(0.0348)ES(0.0348)VPR;
EIQNGNLHESDSESVPR	EIQNGNLHES[79.9663]DS[79.9663]ESVPR	K	D	66	82	17	2	10S(79.9663),12S(79.9663)	sp|Q86UP2-2|KTN1_HUMAN	Q86UP2-2	KTN1_HUMAN	KTN1	Isoform 2 of Kinectin		sp|Q86UP2-3|KTN1_HUMAN, sp|Q86UP2-4|KTN1_HUMAN, sp|Q86UP2|KTN1_HUMAN	1	3.99029e+06	MS/MS	STY:79.9663@EIQNGNLHES(0.6667)DS(0.6667)ES(0.6667)VPR;
EISDDEAEEEK	EIS[79.9663]DDEAEEEK	K	G	224	234	11	2	3S(79.9663)	sp|P08238|HS90B_HUMAN	P08238	HS90B_HUMAN	HSP90AB1	Heat shock protein HSP 90-beta	HSP90AB3P	sp|Q58FF7|H90B3_HUMAN	22	1.1971072E9	MS/MS	STY:79.9663@EIS(1.0000)DDEAEEEK;
EISDDEAEEEKGEK	EIS[79.9663]DDEAEEEKGEK	K	E	224	237	14	2	3S(79.9663)	sp|P08238|HS90B_HUMAN	P08238	HS90B_HUMAN	HSP90AB1	Heat shock protein HSP 90-beta	HSP90AB3P	sp|Q58FF7|H90B3_HUMAN	3	8107554	MS/MS	STY:79.9663@EIS(1.0000)DDEAEEEKGEK;
EISDDEAEEEKGEKEEEDK	EIS[79.9663]DDEAEEEKGEKEEEDK	K	D	224	242	19	3	3S(79.9663)	sp|P08238|HS90B_HUMAN	P08238	HS90B_HUMAN	HSP90AB1	Heat shock protein HSP 90-beta	HSP90AB3P	sp|Q58FF7|H90B3_HUMAN	1	2.4544512E7	MS/MS	STY:79.9663@EIS(1.0000)DDEAEEEKGEKEEEDK;
EISSSPTSK	EIS[79.9663]S[79.9663]SPTSK	R	N	452	460	9	2	3S(79.9663),4S(79.9663)	sp|Q9UQ35|SRRM2_HUMAN	Q9UQ35	SRRM2_HUMAN	SRRM2	Serine/arginine repetitive matrix protein 2		sp|Q9UQ35-2|SRRM2_HUMAN	2	1.1869058E7	MS/MS	STY:79.9663@EIS(0.4414)S(0.3897)S(0.3897)PT(0.3897)S(0.3897)K;
EKEDDEEEEDEDASGGDQDQEER	EKEDDEEEEDEDAS[79.9663]GGDQDQEER	K	R	532	554	23	3	14S(79.9663)	sp|O60216|RAD21_HUMAN	O60216	RAD21_HUMAN	RAD21	Double-strand-break repair protein rad21 homolog			1	0	MS/MS	STY:79.9663@EKEDDEEEEDEDAS(1.0000)GGDQDQEER;
EKEDNSSEEEEEIEPFPEER	EKEDNS[79.9663]S[79.9663]EEEEEIEPFPEER	K	E	290	309	20	3	6S(79.9663),7S(79.9663)	sp|Q4LE39-2|ARI4B_HUMAN	Q4LE39-2	ARI4B_HUMAN	ARID4B	Isoform 2 of AT-rich interactive domain-containing protein 4B		sp|Q4LE39-3|ARI4B_HUMAN, sp|Q4LE39|ARI4B_HUMAN	1	0	MS/MS	STY:79.9663@EKEDNS(1.0000)S(1.0000)EEEEEIEPFPEER;
EKEEEELFPESERPEMLSEQEHMSISGSSAR	EKEEEELFPESERPEMLSEQEHMS[79.9663]IS[79.9663]GS[79.9663]SAR	K	H	401	431	31	3	24S(79.9663),26S(79.9663),28S(79.9663)	sp|Q9UHX1-2|PUF60_HUMAN	Q9UHX1-2	PUF60_HUMAN	PUF60	Isoform 2 of Poly(U)-binding-splicing factor PUF60		sp|Q9UHX1-3|PUF60_HUMAN, sp|Q9UHX1-4|PUF60_HUMAN, sp|Q9UHX1-5|PUF60_HUMAN, sp|Q9UHX1-6|PUF60_HUMAN, sp|Q9UHX1|PUF60_HUMAN	1	2.8625804E7	MS/MS	STY:79.9663@EKEEEELFPES(0.4862)ERPEMLS(0.4862)EQEHMS(0.5069)IS(0.5069)GS(0.5069)S(0.5069)AR;
EKEISDDEAEEEK	EKEIS[79.9663]DDEAEEEK	R	G	222	234	13	2,3	5S(79.9663)	sp|P08238|HS90B_HUMAN	P08238	HS90B_HUMAN	HSP90AB1	Heat shock protein HSP 90-beta			18	3.21418464E8	MS/MS	STY:79.9663@EKEIS(1.0000)DDEAEEEK;
EKPELSEPSHLNGPSSDPEAAFLSR	EKPELSEPSHLNGPSSDPEAAFLS[79.9663]R	K	D	1750	1774	25	3	24S(79.9663)	sp|Q9H4A3-2|WNK1_HUMAN	Q9H4A3-2	WNK1_HUMAN	WNK1	Isoform 2 of Serine/threonine-protein kinase WNK1		sp|Q9H4A3-4|WNK1_HUMAN, sp|Q9H4A3-5|WNK1_HUMAN, sp|Q9H4A3-6|WNK1_HUMAN, sp|Q9H4A3-7|WNK1_HUMAN, sp|Q9H4A3|WNK1_HUMAN	1	3.9315244E7	MS/MS	STY:79.9663@EKPELS(0.0262)EPS(0.0616)HLNGPS(0.0394)S(0.0394)DPEAAFLS(0.8335)R;
EKPELSEPSHLNGPSSDPEAAFLSR	EKPELSEPSHLNGPSS[79.9663]DPEAAFLSR	K	D	1750	1774	25	3	16S(79.9663)	sp|Q9H4A3-2|WNK1_HUMAN	Q9H4A3-2	WNK1_HUMAN	WNK1	Isoform 2 of Serine/threonine-protein kinase WNK1		sp|Q9H4A3-4|WNK1_HUMAN, sp|Q9H4A3-5|WNK1_HUMAN, sp|Q9H4A3-6|WNK1_HUMAN, sp|Q9H4A3-7|WNK1_HUMAN, sp|Q9H4A3|WNK1_HUMAN	1	0	MS/MS	STY:79.9663@EKPELS(0.0430)EPS(0.0430)HLNGPS(0.0241)S(0.7717)DPEAAFLS(0.1182)R;
EKPELSEPSHLNGPSSDPEAAFLSR	EKPELSEPSHLNGPS[79.9663]SDPEAAFLSR	K	D	1750	1774	25	3	15S(79.9663)	sp|Q9H4A3-2|WNK1_HUMAN	Q9H4A3-2	WNK1_HUMAN	WNK1	Isoform 2 of Serine/threonine-protein kinase WNK1		sp|Q9H4A3-4|WNK1_HUMAN, sp|Q9H4A3-5|WNK1_HUMAN, sp|Q9H4A3-6|WNK1_HUMAN, sp|Q9H4A3-7|WNK1_HUMAN, sp|Q9H4A3|WNK1_HUMAN	1	3.7330668E7	MS/MS	STY:79.9663@EKPELS(0.2702)EPS(0.1357)HLNGPS(0.2866)S(0.2866)DPEAAFLS(0.0208)R;
EKSPVREPVDNLSPEER	EKS[79.9663]PVREPVDNLSPEER	R	D	131	147	17	3	3S(79.9663)	sp|Q86U06-2|RBM23_HUMAN	Q86U06-2	RBM23_HUMAN	RBM23	Isoform 2 of Probable RNA-binding protein 23		sp|Q86U06-3|RBM23_HUMAN, sp|Q86U06-5|RBM23_HUMAN, sp|Q86U06|RBM23_HUMAN	1	2720164	MS/MS	STY:79.9663@EKS(0.9278)PVREPVDNLS(0.0722)PEER;
EKTPSPKEEDEEPESPPEK	EKTPS[79.9663]PKEEDEEPES[79.9663]PPEK	K	K	200	218	19	3	15S(79.9663),5S(79.9663)	sp|Q9H1E3|NUCKS_HUMAN	Q9H1E3	NUCKS_HUMAN	NUCKS1	Nuclear ubiquitous casein and cyclin-dependent kinase substrate 1		sp|Q9H1E3-2|NUCKS_HUMAN	1	3.133862E7	MS/MS	STY:79.9663@EKT(0.2641)PS(0.8677)PKEEDEEPES(0.8682)PPEK;
EKTDDTSGEDNDEK	EKT[79.9663]DDT[79.9663]SGEDNDEK	K	E	548	561	14	2	3T(79.9663),6T(79.9663)	sp|Q9Y618-4|NCOR2_HUMAN	Q9Y618-4	NCOR2_HUMAN	NCOR2	Isoform 3 of Nuclear receptor corepressor 2		sp|Q9Y618-5|NCOR2_HUMAN, sp|Q9Y618|NCOR2_HUMAN	1	0	MS/MS	STY:79.9663@EKT(0.6818)DDT(0.6591)S(0.6591)GEDNDEK;
EKTPELPEPSVK	EKT[79.9663]PELPEPSVK	K	V	218	229	12	2	3T(79.9663)	sp|Q8IYB3|SRRM1_HUMAN	Q8IYB3	SRRM1_HUMAN	SRRM1	Serine/arginine repetitive matrix protein 1		sp|Q8IYB3-2|SRRM1_HUMAN	4	1.5218034E7	MS/MS	STY:79.9663@EKT(0.9359)PELPEPS(0.0641)VK;
EKTPSPKEEDEEPESPPEK	EKT[79.9663]PSPKEEDEEPES[79.9663]PPEK	K	K	200	218	19	3	15S(79.9663),3T(79.9663)	sp|Q9H1E3|NUCKS_HUMAN	Q9H1E3	NUCKS_HUMAN	NUCKS1	Nuclear ubiquitous casein and cyclin-dependent kinase substrate 1		sp|Q9H1E3-2|NUCKS_HUMAN	4	4.8786976E7	MS/MS	STY:79.9663@EKT(0.9323)PS(0.1369)PKEEDEEPES(0.9308)PPEK;
EKTPSPKEEDEEPESPPEK	EKT[79.9663]PS[79.9663]PKEEDEEPESPPEK	K	K	200	218	19	3	3T(79.9663),5S(79.9663)	sp|Q9H1E3|NUCKS_HUMAN	Q9H1E3	NUCKS_HUMAN	NUCKS1	Nuclear ubiquitous casein and cyclin-dependent kinase substrate 1		sp|Q9H1E3-2|NUCKS_HUMAN	4	4.8786976E7	MS/MS	STY:79.9663@EKT(0.9241)PS(0.9241)PKEEDEEPES(0.1518)PPEK;
EKTPSPKEEDEEPESPPEK	EKT[79.9663]PS[79.9663]PKEEDEEPES[79.9663]PPEK	K	K	200	218	19	2,3	15S(79.9663),3T(79.9663),5S(79.9663)	sp|Q9H1E3|NUCKS_HUMAN	Q9H1E3	NUCKS_HUMAN	NUCKS1	Nuclear ubiquitous casein and cyclin-dependent kinase substrate 1		sp|Q9H1E3-2|NUCKS_HUMAN	24	5.2731536E8	MS/MS	STY:79.9663@EKT(1.0000)PS(1.0000)PKEEDEEPES(1.0000)PPEK;
ELDEEGSDPPLPGR	ELDEEGS[79.9663]DPPLPGR	R	A	169	182	14	2	7S(79.9663)	sp|Q9BRJ6|CG050_HUMAN	Q9BRJ6	CG050_HUMAN	C7orf50	Uncharacterized protein C7orf50			1	1.0702801E7	MS/MS	STY:79.9663@ELDEEGS(1.0000)DPPLPGR;
ELDEGRYGVYEDENYEVGSDDEEIPFK	ELDEGRYGVYEDENYEVGS[79.9663]DDEEIPFK	R	C	235	261	27	3	19S(79.9663)	sp|O15541|R113A_HUMAN	O15541	R113A_HUMAN	RNF113A	E3 ubiquitin-protein ligase RNF113A			1	0	MS/MS	STY:79.9663@ELDEGRY(0.0398)GVY(0.0398)EDENY(0.0854)EVGS(0.8350)DDEEIPFK;
ELEAIFGRPVVDGEEGEPHSISPR	ELEAIFGRPVVDGEEGEPHS[79.9663]ISPR	K	P	274	297	24	3	20S(79.9663)	sp|P36507|MP2K2_HUMAN	P36507	MP2K2_HUMAN	MAP2K2	Dual specificity mitogen-activated protein kinase kinase 2			1	3.0697e+06	MS/MS	STY:79.9663@ELEAIFGRPVVDGEEGEPHS(0.5000)IS(0.5000)PR;
ELEEEEENSDEDELDSHTMVK	ELEEEEENS[79.9663]DEDELDSHTMVK	R	T	336	356	21	3	9S(79.9663)	sp|Q13188-2|STK3_HUMAN	Q13188-2	STK3_HUMAN	STK3	Isoform 2 of Serine/threonine-protein kinase 3		sp|Q13188|STK3_HUMAN	1	0	MS/MS	STY:79.9663@ELEEEEENS(0.9032)DEDELDS(0.0484)HT(0.0484)MVK;
ELEENDSENSEFEDDGSEK	ELEENDS[79.9663]ENS[79.9663]EFEDDGSEK	K	V	591	609	19	2	10S(79.9663),7S(79.9663)	sp|O43719|HTSF1_HUMAN	O43719	HTSF1_HUMAN	HTATSF1	HIV Tat-specific factor 1			2	1.4398213E7	MS/MS	STY:79.9663@ELEENDS(0.8843)ENS(0.8843)EFEDDGS(0.2315)EK;
ELEENDSENSEFEDDGSEK	ELEENDS[79.9663]ENS[79.9663]EFEDDGS[79.9663]EK	K	V	591	609	19	2	10S(79.9663),17S(79.9663),7S(79.9663)	sp|O43719|HTSF1_HUMAN	O43719	HTSF1_HUMAN	HTATSF1	HIV Tat-specific factor 1			5	4.9759896E7	MS/MS	STY:79.9663@ELEENDS(1.0000)ENS(1.0000)EFEDDGS(1.0000)EK;
ELESSEEGGSAEER	ELES[79.9663]SEEGGSAEER	K	R	15	28	14	2	4S(79.9663)	sp|Q9HAS0|NJMU_HUMAN	Q9HAS0	NJMU_HUMAN	C17orf75	Protein Njmu-R1			1	0	MS/MS	STY:79.9663@ELES(0.4865)S(0.4865)EEGGS(0.0271)AEER;
ELGTGEQPLSPTTATSPYGGGHALAGQTSPK	ELGTGEQPLSPTTATSPY[79.9663]GGGHALAGQTSPK	R	Q	430	460	31	3	18Y(79.9663)	sp|Q96NU1-1|SAM11_HUMAN	Q96NU1-1	SAM11_HUMAN	SAMD11	Isoform 1 of Sterile alpha motif domain-containing protein 11		sp|Q96NU1-2|SAM11_HUMAN, sp|Q96NU1-4|SAM11_HUMAN, sp|Q96NU1-5|SAM11_HUMAN, sp|Q96NU1-6|SAM11_HUMAN, sp|Q96NU1|SAM11_HUMAN	1	5254636	MS/MS	STY:79.9663@ELGT(0.0110)GEQPLS(0.0167)PT(0.0708)T(0.0708)AT(0.0708)S(0.0708)PY(0.6724)GGGHALAGQT(0.0083)S(0.0083)PK;
ELNSNHDGADETSEK	ELNSNHDGADET[79.9663]SEK	K	E	12	26	15	2	12T(79.9663)	sp|Q01105-2|SET_HUMAN	Q01105-2	SET_HUMAN	SET	Isoform 2 of Protein SET			1	9.5075456E7	MS/MS	STY:79.9663@ELNS(0.0278)NHDGADET(0.4861)S(0.4861)EK;
ELNSNHDGADETSEK	ELNS[79.9663]NHDGADETSEK	K	E	12	26	15	2	4S(79.9663)	sp|Q01105-2|SET_HUMAN	Q01105-2	SET_HUMAN	SET	Isoform 2 of Protein SET			1	9.5075456E7	MS/MS	STY:79.9663@ELNS(0.3333)NHDGADET(0.3333)S(0.3333)EK;
ELSNSPLRENSFGSPLEFR	ELSNS[79.9663]PLRENSFGSPLEFR	K	N	1316	1334	19	3	5S(79.9663)	sp|Q9UQ35|SRRM2_HUMAN	Q9UQ35	SRRM2_HUMAN	SRRM2	Serine/arginine repetitive matrix protein 2		sp|Q9UQ35-2|SRRM2_HUMAN	1	1.2584465E7	MS/MS	STY:79.9663@ELS(0.0260)NS(0.9103)PLRENS(0.0334)FGS(0.0304)PLEFR;
ELSNSPLRENSFGSPLEFR	ELSNS[79.9663]PLRENS[79.9663]FGSPLEFR	K	N	1316	1334	19	3	11S(79.9663),5S(79.9663)	sp|Q9UQ35|SRRM2_HUMAN	Q9UQ35	SRRM2_HUMAN	SRRM2	Serine/arginine repetitive matrix protein 2		sp|Q9UQ35-2|SRRM2_HUMAN	1	0	MS/MS	STY:79.9663@ELS(0.1777)NS(0.6074)PLRENS(0.6074)FGS(0.6074)PLEFR;
ELSNSPLRENSFGSPLEFR	ELS[79.9663]NS[79.9663]PLRENSFGSPLEFR	K	N	1316	1334	19	3	3S(79.9663),5S(79.9663)	sp|Q9UQ35|SRRM2_HUMAN	Q9UQ35	SRRM2_HUMAN	SRRM2	Serine/arginine repetitive matrix protein 2		sp|Q9UQ35-2|SRRM2_HUMAN	2	1.1061448E7	MS/MS	STY:79.9663@ELS(0.5583)NS(0.5128)PLRENS(0.5128)FGS(0.4160)PLEFR;
ELSNSPLRENSFGSPLEFR	ELS[79.9663]NS[79.9663]PLRENSFGS[79.9663]PLEFR	K	N	1316	1334	19	3	14S(79.9663),3S(79.9663),5S(79.9663)	sp|Q9UQ35|SRRM2_HUMAN	Q9UQ35	SRRM2_HUMAN	SRRM2	Serine/arginine repetitive matrix protein 2		sp|Q9UQ35-2|SRRM2_HUMAN	1	6465481	MS/MS	STY:79.9663@ELS(0.7598)NS(0.7395)PLRENS(0.7395)FGS(0.7613)PLEFR;
ELSPAGSISK	ELS[79.9663]PAGSISK	K	N	556	565	10	2	3S(79.9663)	sp|O95453-2|PARN_HUMAN	O95453-2	PARN_HUMAN	PARN	Isoform 2 of Poly(A)-specific ribonuclease PARN		sp|O95453-3|PARN_HUMAN, sp|O95453-4|PARN_HUMAN, sp|O95453|PARN_HUMAN	1	0	MS/MS	STY:79.9663@ELS(0.9365)PAGS(0.0318)IS(0.0318)K;
ELSVQDQPSLSPTSLQNSSSHTTTAK	ELS[79.9663]VQDQPSLSPTSLQNSSSHTTTAK	K	G	422	447	26	3	3S(79.9663)	sp|O95628-10|CNOT4_HUMAN	O95628-10	CNOT4_HUMAN	CNOT4	Isoform 10 of CCR4-NOT transcription complex subunit 4		sp|O95628-2|CNOT4_HUMAN, sp|O95628-3|CNOT4_HUMAN, sp|O95628-4|CNOT4_HUMAN, sp|O95628-6|CNOT4_HUMAN, sp|O95628-7|CNOT4_HUMAN, sp|O95628-8|CNOT4_HUMAN, sp|O95628-9|CNOT4_HUMAN, sp|O95628|CNOT4_HUMAN	1	5.32278e+06	MS/MS	STY:79.9663@ELS(0.7996)VQDQPS(0.0280)LS(0.0280)PT(0.0280)S(0.0280)LQNS(0.0175)S(0.0175)S(0.0175)HT(0.0175)T(0.0092)T(0.0092)AK;
EMDESLANLSEDEYYSEEERNAK	EMDES[79.9663]LANLSEDEYY[79.9663]SEEERNAK	R	A	122	144	23	3	15Y(79.9663),5S(79.9663)	sp|O60341|KDM1A_HUMAN	O60341	KDM1A_HUMAN	KDM1A	Lysine-specific histone demethylase 1A		sp|O60341-2|KDM1A_HUMAN	1	1.057802E7	MS/MS	STY:79.9663@EMDES(0.4998)LANLS(0.0335)EDEY(0.4746)Y(0.4961)S(0.4961)EEERNAK;
EMDTARTPLSEAEFEEIMNR	EMDTART[79.9663]PLSEAEFEEIMNR	R	N	438	457	20	3	7T(79.9663)	sp|Q16630-2|CPSF6_HUMAN	Q16630-2	CPSF6_HUMAN	CPSF6	Isoform 2 of Cleavage and polyadenylation specificity factor subunit 6		sp|Q16630-3|CPSF6_HUMAN, sp|Q16630|CPSF6_HUMAN	1	0	MS/MS	STY:79.9663@EMDT(0.1906)ART(0.4047)PLS(0.4047)EAEFEEIMNR;
EMEHNTVCAAGTSPVGEIGEEK	EMEHNTVC[57.0215]AAGT[79.9663]SPVGEIGEEK	K	I	1544	1565	22	3	12T(79.9663),8C(57.0215)	sp|P18583-10|SON_HUMAN	P18583-10	SON_HUMAN	SON	Isoform J of Protein SON		sp|P18583-2|SON_HUMAN, sp|P18583-3|SON_HUMAN, sp|P18583-4|SON_HUMAN, sp|P18583-5|SON_HUMAN, sp|P18583-6|SON_HUMAN, sp|P18583-7|SON_HUMAN, sp|P18583-9|SON_HUMAN, sp|P18583|SON_HUMAN	1	8.19792e+06	MS/MS	STY:79.9663@EMEHNT(0.0381)VCAAGT(0.8369)S(0.1249)PVGEIGEEK;
EMLASDDEEDVSSK	EMLAS[79.9663]DDEEDVSSK	K	V	76	89	14	2	5S(79.9663)	sp|Q0ZGT2-2|NEXN_HUMAN	Q0ZGT2-2	NEXN_HUMAN	NEXN	Isoform 2 of Nexilin		sp|Q0ZGT2-3|NEXN_HUMAN, sp|Q0ZGT2-4|NEXN_HUMAN, sp|Q0ZGT2|NEXN_HUMAN	4	2.1296418E7	MS/MS	STY:79.9663@EMLAS(0.9244)DDEEDVS(0.0381)S(0.0375)K;
EMLMEDVGSEEEQEEEDEAPFQEK	EMLMEDVGS[79.9663]EEEQEEEDEAPFQEK	R	D	105	128	24	3	9S(79.9663)	sp|Q9H1E3|NUCKS_HUMAN	Q9H1E3	NUCKS_HUMAN	NUCKS1	Nuclear ubiquitous casein and cyclin-dependent kinase substrate 1		sp|Q9H1E3-2|NUCKS_HUMAN	2	0	MS/MS	STY:79.9663@EMLMEDVGS(1.0000)EEEQEEEDEAPFQEK;
EMPQDLRSPARTPPSEEDSAEAER	EMPQDLRS[79.9663]PART[79.9663]PPSEEDSAEAER	K	L	70	93	24	3	12T(79.9663),8S(79.9663)	sp|O43765|SGTA_HUMAN	O43765	SGTA_HUMAN	SGTA	Small glutamine-rich tetratricopeptide repeat-containing protein alpha			1	2.281176E7	MS/MS	STY:79.9663@EMPQDLRS(0.9103)PART(0.9103)PPS(0.0897)EEDS(0.0897)AEAER;
EMEHNTVCAAGTSPVGEIGEEK	EM[15.9949]EHNTVC[57.0215]AAGT[79.9663]SPVGEIGEEK	K	I	1544	1565	22	3	12T(79.9663),2M(15.9949),8C(57.0215)	sp|P18583-10|SON_HUMAN	P18583-10	SON_HUMAN	SON	Isoform J of Protein SON		sp|P18583-2|SON_HUMAN, sp|P18583-3|SON_HUMAN, sp|P18583-4|SON_HUMAN, sp|P18583-5|SON_HUMAN, sp|P18583-6|SON_HUMAN, sp|P18583-7|SON_HUMAN, sp|P18583-9|SON_HUMAN, sp|P18583|SON_HUMAN	2	4891182	MS/MS	STY:79.9663@EMEHNT(0.0307)VCAAGT(0.4847)S(0.4847)PVGEIGEEK;M:15.9949@EM(1.0000)EHNTVCAAGTSPVGEIGEEK;
EMLASDDEEDVSSK	EM[15.9949]LASDDEEDVS[79.9663]SK	K	V	76	89	14	2	12S(79.9663),2M(15.9949)	sp|Q0ZGT2-2|NEXN_HUMAN	Q0ZGT2-2	NEXN_HUMAN	NEXN	Isoform 2 of Nexilin		sp|Q0ZGT2-3|NEXN_HUMAN, sp|Q0ZGT2-4|NEXN_HUMAN, sp|Q0ZGT2|NEXN_HUMAN	1	0	MS/MS	STY:79.9663@EMLAS(0.0773)DDEEDVS(0.4613)S(0.4613)K;M:15.9949@EM(1.0000)LASDDEEDVSSK;
EMLASDDEEDVSSK	EM[15.9949]LAS[79.9663]DDEEDVSSK	K	V	76	89	14	2	2M(15.9949),5S(79.9663)	sp|Q0ZGT2-2|NEXN_HUMAN	Q0ZGT2-2	NEXN_HUMAN	NEXN	Isoform 2 of Nexilin		sp|Q0ZGT2-3|NEXN_HUMAN, sp|Q0ZGT2-4|NEXN_HUMAN, sp|Q0ZGT2|NEXN_HUMAN	2	7.861e+06	MS/MS	STY:79.9663@EMLAS(0.9178)DDEEDVS(0.0411)S(0.0411)K;M:15.9949@EM(1.0000)LASDDEEDVSSK;
EMLMEDVGSEEEQEEEDEAPFQEK	EM[15.9949]LMEDVGS[79.9663]EEEQEEEDEAPFQEK	R	D	105	128	24	3	2M(15.9949),9S(79.9663)	sp|Q9H1E3|NUCKS_HUMAN	Q9H1E3	NUCKS_HUMAN	NUCKS1	Nuclear ubiquitous casein and cyclin-dependent kinase substrate 1		sp|Q9H1E3-2|NUCKS_HUMAN	2	1.0802668E7	MS/MS	STY:79.9663@EMLMEDVGS(1.0000)EEEQEEEDEAPFQEK;M:15.9949@EM(0.5000)LM(0.5000)EDVGSEEEQEEEDEAPFQEK;
EMLMEDVGSEEEQEEEDEAPFQEK	EM[15.9949]LM[15.9949]EDVGS[79.9663]EEEQEEEDEAPFQEK	R	D	105	128	24	3	2M(15.9949),4M(15.9949),9S(79.9663)	sp|Q9H1E3|NUCKS_HUMAN	Q9H1E3	NUCKS_HUMAN	NUCKS1	Nuclear ubiquitous casein and cyclin-dependent kinase substrate 1		sp|Q9H1E3-2|NUCKS_HUMAN	1	0	MS/MS	STY:79.9663@EMLMEDVGS(1.0000)EEEQEEEDEAPFQEK;M:15.9949@EM(1.0000)LM(1.0000)EDVGSEEEQEEEDEAPFQEK;
ENDLYVLPPLQEEEKHSSEEEDEK	ENDLYVLPPLQEEEKHS[79.9663]S[79.9663]EEEDEK	R	E	140	163	24	3	17S(79.9663),18S(79.9663)	sp|P28715|ERCC5_HUMAN	P28715	ERCC5_HUMAN	ERCC5	DNA excision repair protein ERCC-5		sp|P28715-3|ERCC5_HUMAN	1	1.307376E7	MS/MS	STY:79.9663@ENDLY(0.3226)VLPPLQEEEKHS(0.8393)S(0.8382)EEEDEK;
ENEPDDAATHSPPGTVSALQETK	ENEPDDAATHSPPGTVS[79.9663]ALQETK	K	L	8	30	23	3	17S(79.9663)	sp|Q6ZMT1|STAC2_HUMAN	Q6ZMT1	STAC2_HUMAN	STAC2	SH3 and cysteine-rich domain-containing protein 2			1	1.86018e+06	MS/MS	STY:79.9663@ENEPDDAAT(0.0225)HS(0.0225)PPGT(0.0225)VS(0.4663)ALQET(0.4663)K;
ENESSDSEEEVSRPR	ENES[79.9663]S[79.9663]DS[79.9663]EEEVSRPR	K	K	2487	2501	15	2	4S(79.9663),5S(79.9663),7S(79.9663)	sp|Q6KC79-2|NIPBL_HUMAN	Q6KC79-2	NIPBL_HUMAN	NIPBL	Isoform 2 of Nipped-B-like protein		sp|Q6KC79|NIPBL_HUMAN	3	1.9317388E7	MS/MS	STY:79.9663@ENES(0.9261)S(0.9261)DS(0.9261)EEEVS(0.2217)RPR;
ENIKPNETSPSFSK	ENIKPNET[79.9663]SPSFSK	K	A	764	777	14	2	8T(79.9663)	sp|Q99700-2|ATX2_HUMAN	Q99700-2	ATX2_HUMAN	ATXN2	Isoform 2 of Ataxin-2		sp|Q99700-4|ATX2_HUMAN, sp|Q99700-5|ATX2_HUMAN, sp|Q99700|ATX2_HUMAN	2	0	MS/MS	STY:79.9663@ENIKPNET(0.3267)S(0.3267)PS(0.3267)FS(0.0199)K;
ENPPVEDSSDEDDK	ENPPVEDS[79.9663]SDEDDK	R	R	491	504	14	2	8S(79.9663)	sp|Q8TCJ2|STT3B_HUMAN	Q8TCJ2	STT3B_HUMAN	STT3B	Dolichyl-diphosphooligosaccharide--protein glycosyltransferase subunit STT3B			5	2.2350512E7	MS/MS	STY:79.9663@ENPPVEDS(0.7874)S(0.2126)DEDDK;
ENPPVEDSSDEDDK	ENPPVEDS[79.9663]S[79.9663]DEDDK	R	R	491	504	14	2	8S(79.9663),9S(79.9663)	sp|Q8TCJ2|STT3B_HUMAN	Q8TCJ2	STT3B_HUMAN	STT3B	Dolichyl-diphosphooligosaccharide--protein glycosyltransferase subunit STT3B			8	4.3338024E7	MS/MS	STY:79.9663@ENPPVEDS(1.0000)S(1.0000)DEDDK;
ENPPVEDSSDEDDKR	ENPPVEDS[79.9663]S[79.9663]DEDDKR	R	N	491	505	15	2	8S(79.9663),9S(79.9663)	sp|Q8TCJ2|STT3B_HUMAN	Q8TCJ2	STT3B_HUMAN	STT3B	Dolichyl-diphosphooligosaccharide--protein glycosyltransferase subunit STT3B			2	8989248	MS/MS	STY:79.9663@ENPPVEDS(1.0000)S(1.0000)DEDDKR;
ENQEPLRSPEVGDEEALRPLTK	ENQEPLRS[79.9663]PEVGDEEALRPLTK	K	E	673	694	22	3	8S(79.9663)	sp|P48681|NEST_HUMAN	P48681	NEST_HUMAN	NES	Nestin			1	0	MS/MS	STY:79.9663@ENQEPLRS(0.8553)PEVGDEEALRPLT(0.1447)K;
ENRDIEISTEEEK	ENRDIEIS[79.9663]T[79.9663]EEEK	K	D	337	349	13	2	8S(79.9663),9T(79.9663)	sp|Q4G0J3-3|LARP7_HUMAN	Q4G0J3-3	LARP7_HUMAN	LARP7	Isoform 3 of La-related protein 7		sp|Q4G0J3|LARP7_HUMAN	1	0	MS/MS	STY:79.9663@ENRDIEIS(1.0000)T(1.0000)EEEK;
ENSGPVENGVSDQEGEEQAREPELPCGLAPAVSR	ENSGPVENGVS[79.9663]DQEGEEQAREPELPC[57.0215]GLAPAVSR	K	E	768	801	34	3	11S(79.9663),26C(57.0215)	sp|Q8TEQ6|GEMI5_HUMAN	Q8TEQ6	GEMI5_HUMAN	GEMIN5	Gem-associated protein 5			1	0	MS/MS	STY:79.9663@ENS(0.0929)GPVENGVS(0.8757)DQEGEEQAREPELPCGLAPAVS(0.0315)R;
ENSGPVENGVSDQEGEEQAREPELPCGLAPAVSR	ENS[79.9663]GPVENGVSDQEGEEQAREPELPC[57.0215]GLAPAVSR	K	E	768	801	34	3	26C(57.0215),3S(79.9663)	sp|Q8TEQ6|GEMI5_HUMAN	Q8TEQ6	GEMI5_HUMAN	GEMIN5	Gem-associated protein 5			1	0	MS/MS	STY:79.9663@ENS(0.7602)GPVENGVS(0.1860)DQEGEEQAREPELPCGLAPAVS(0.0538)R;
ENSPNSFPR	ENS[79.9663]PNSFPR	K	R	451	459	9	2	3S(79.9663)	sp|Q9P260-2|RELCH_HUMAN	Q9P260-2	RELCH_HUMAN	RELCH	Isoform 2 of RAB11-binding protein RELCH		sp|Q9P260|RELCH_HUMAN	1	1.95616e+06	MS/MS	STY:79.9663@ENS(0.5000)PNS(0.5000)FPR;
ENSSPSVTSANLDHTK	ENS[79.9663]SPSVTSANLDHTK	K	P	6	21	16	2	3S(79.9663)	sp|O75909-1|CCNK_HUMAN	O75909-1	CCNK_HUMAN	CCNK	Isoform 3 of Cyclin-K		sp|O75909-2|CCNK_HUMAN, sp|O75909-4|CCNK_HUMAN, sp|O75909|CCNK_HUMAN	1	0	MS/MS	STY:79.9663@ENS(0.2444)S(0.2444)PS(0.2444)VT(0.2444)S(0.0113)ANLDHT(0.0113)K;
ENSSSQDPQTEGTR	ENS[79.9663]SSQDPQTEGTR	R	-	359	372	14	2	3S(79.9663)	sp|P15151-2|PVR_HUMAN	P15151-2	PVR_HUMAN	PVR	Isoform Beta of Poliovirus receptor		sp|P15151-3|PVR_HUMAN, sp|P15151|PVR_HUMAN	1	0	MS/MS	STY:79.9663@ENS(0.4534)S(0.4534)S(0.0311)QDPQT(0.0311)EGT(0.0311)R;
ENVEYIEREESDGEYDEFGR	ENVEYIEREESDGEY[79.9663]DEFGR	R	K	110	129	20	3	15Y(79.9663)	sp|O95218-2|ZRAB2_HUMAN	O95218-2	ZRAB2_HUMAN	ZRANB2	Isoform 2 of Zinc finger Ran-binding domain-containing protein 2		sp|O95218|ZRAB2_HUMAN	1	4.1087864E7	MS/MS	STY:79.9663@ENVEY(0.0316)IEREES(0.0483)DGEY(0.9201)DEFGR;
ENVEYIEREESDGEYDEFGRK	ENVEYIEREESDGEY[79.9663]DEFGRK	R	K	110	130	21	3	15Y(79.9663)	sp|O95218-2|ZRAB2_HUMAN	O95218-2	ZRAB2_HUMAN	ZRANB2	Isoform 2 of Zinc finger Ran-binding domain-containing protein 2		sp|O95218|ZRAB2_HUMAN	1	3.9955948E7	MS/MS	STY:79.9663@ENVEY(0.0448)IEREES(0.0591)DGEY(0.8961)DEFGRK;
ENVEYIEREESDGEYDEFGRK	ENVEYIEREES[79.9663]DGEYDEFGRK	R	K	110	130	21	3	11S(79.9663)	sp|O95218-2|ZRAB2_HUMAN	O95218-2	ZRAB2_HUMAN	ZRANB2	Isoform 2 of Zinc finger Ran-binding domain-containing protein 2		sp|O95218|ZRAB2_HUMAN	1	3.9955948E7	MS/MS	STY:79.9663@ENVEY(0.4144)IEREES(0.5534)DGEY(0.0322)DEFGRK;
ENVEYIEREESDGEYDEFGR	ENVEY[79.9663]IEREESDGEYDEFGR	R	K	110	129	20	2,3	5Y(79.9663)	sp|O95218-2|ZRAB2_HUMAN	O95218-2	ZRAB2_HUMAN	ZRANB2	Isoform 2 of Zinc finger Ran-binding domain-containing protein 2		sp|O95218|ZRAB2_HUMAN	4	6.9310112E7	MS/MS	STY:79.9663@ENVEY(0.9269)IEREES(0.0368)DGEY(0.0363)DEFGR;
ENVEYIEREESDGEYDEFGRK	ENVEY[79.9663]IEREESDGEYDEFGRK	R	K	110	130	21	3	5Y(79.9663)	sp|O95218-2|ZRAB2_HUMAN	O95218-2	ZRAB2_HUMAN	ZRANB2	Isoform 2 of Zinc finger Ran-binding domain-containing protein 2		sp|O95218|ZRAB2_HUMAN	1	3.9955948E7	MS/MS	STY:79.9663@ENVEY(0.4908)IEREES(0.4908)DGEY(0.0183)DEFGRK;
ENYSDSEEEDDDDVASSR	ENY[79.9663]SDSEEEDDDDVASSR	R	Q	256	273	18	2	3Y(79.9663)	sp|Q9Y2U8|MAN1_HUMAN	Q9Y2U8	MAN1_HUMAN	LEMD3	Inner nuclear membrane protein Man1			1	0	MS/MS	STY:79.9663@ENY(0.3274)S(0.3274)DS(0.3274)EEEDDDDVAS(0.0090)S(0.0090)R;
ENYSDSEEEDDDDVASSR	ENY[79.9663]S[79.9663]DSEEEDDDDVASSR	R	Q	256	273	18	2	3Y(79.9663),4S(79.9663)	sp|Q9Y2U8|MAN1_HUMAN	Q9Y2U8	MAN1_HUMAN	LEMD3	Inner nuclear membrane protein Man1			2	0	MS/MS	STY:79.9663@ENY(0.6749)S(0.6749)DS(0.2168)EEEDDDDVAS(0.2166)S(0.2166)R;
EPAITSQNSPEAR	EPAIT[79.9663]SQNSPEAR	K	E	92	104	13	2	5T(79.9663)	sp|P23193|TCEA1_HUMAN	P23193	TCEA1_HUMAN	TCEA1	Transcription elongation factor A protein 1		sp|P23193-2|TCEA1_HUMAN	3	1.6380648E7	MS/MS	STY:79.9663@EPAIT(0.3333)S(0.3333)QNS(0.3333)PEAR;
EPAITSQNSPEAREESTSSGNVSNR	EPAIT[79.9663]SQNSPEAREESTSSGNVSNR	K	K	92	116	25	3	5T(79.9663)	sp|P23193|TCEA1_HUMAN	P23193	TCEA1_HUMAN	TCEA1	Transcription elongation factor A protein 1		sp|P23193-2|TCEA1_HUMAN	2	2.95917e+06	MS/MS	STY:79.9663@EPAIT(0.2993)S(0.2993)QNS(0.2993)PEAREES(0.0109)T(0.0109)S(0.0109)S(0.0109)GNVS(0.0585)NR;
EPALPLEPDSGGNTSPGVTANGEAR	EPALPLEPDSGGNTS[79.9663]PGVTANGEAR	R	T	681	705	25	3	15S(79.9663)	sp|Q92974-2|ARHG2_HUMAN	Q92974-2	ARHG2_HUMAN	ARHGEF2	Isoform 2 of Rho guanine nucleotide exchange factor 2		sp|Q92974-3|ARHG2_HUMAN, sp|Q92974|ARHG2_HUMAN	1	2.2086366E7	MS/MS	STY:79.9663@EPALPLEPDS(0.0225)GGNT(0.0844)S(0.8740)PGVT(0.0191)ANGEAR;
EPALPLEPDSGGNTSPGVTANGEAR	EPALPLEPDS[79.9663]GGNTSPGVTANGEAR	R	T	681	705	25	3	10S(79.9663)	sp|Q92974-2|ARHG2_HUMAN	Q92974-2	ARHG2_HUMAN	ARHGEF2	Isoform 2 of Rho guanine nucleotide exchange factor 2		sp|Q92974-3|ARHG2_HUMAN, sp|Q92974|ARHG2_HUMAN	2	2.2086366E7	MS/MS	STY:79.9663@EPALPLEPDS(0.3299)GGNT(0.3299)S(0.3299)PGVT(0.0104)ANGEAR;
EPDSGSHSRQSSTDSSGGHPGPR	EPDS[79.9663]GS[79.9663]HS[79.9663]RQSSTDSSGGHPGPR	K	L	55	77	23	3	4S(79.9663),6S(79.9663),8S(79.9663)	sp|Q9GZV5|WWTR1_HUMAN	Q9GZV5	WWTR1_HUMAN	WWTR1	WW domain-containing transcription regulator protein 1			1	0	MS/MS	STY:79.9663@EPDS(0.7955)GS(0.7955)HS(0.7955)RQS(0.1227)S(0.1227)T(0.1227)DS(0.1227)S(0.1227)GGHPGPR;
EPEMPGPREESEEEEDEDDEEEEEEEK	EPEMPGPREES[79.9663]EEEEDEDDEEEEEEEK	K	G	22	48	27	3	11S(79.9663)	sp|P35659-2|DEK_HUMAN	P35659-2	DEK_HUMAN	DEK	Isoform 2 of Protein DEK		sp|P35659|DEK_HUMAN	13	2.62510816E8	MS/MS	STY:79.9663@EPEMPGPREES(1.0000)EEEEDEDDEEEEEEEK;
EPEMPGPREESEEEEDEDDEEEEEEEK	EPEM[15.9949]PGPREES[79.9663]EEEEDEDDEEEEEEEK	K	G	22	48	27	3	11S(79.9663),4M(15.9949)	sp|P35659-2|DEK_HUMAN	P35659-2	DEK_HUMAN	DEK	Isoform 2 of Protein DEK		sp|P35659|DEK_HUMAN	6	5.9597804E7	MS/MS	STY:79.9663@EPEMPGPREES(1.0000)EEEEDEDDEEEEEEEK;M:15.9949@EPEM(1.0000)PGPREESEEEEDEDDEEEEEEEK;
EPGGWGAGASAPVEDDSDAETYGEENDEQGNYSK	EPGGWGAGASAPVEDDSDAET[79.9663]YGEENDEQGNYSK	R	R	78	111	34	3	21T(79.9663)	sp|Q9NQS1|AVEN_HUMAN	Q9NQS1	AVEN_HUMAN	AVEN	Cell death regulator Aven			1	0	MS/MS	STY:79.9663@EPGGWGAGAS(0.0544)APVEDDS(0.0544)DAET(0.3639)Y(0.3639)GEENDEQGNY(0.0817)S(0.0817)K;
EPHSPADQPEQQAESTLTSAETR	EPHS[79.9663]PADQPEQQAESTLTSAETR	K	G	553	575	23	3	4S(79.9663)	sp|Q9H2Y7-2|ZN106_HUMAN	Q9H2Y7-2	ZN106_HUMAN	ZNF106	Isoform 2 of Zinc finger protein 106		sp|Q9H2Y7|ZN106_HUMAN	1	4.67071e+06	MS/MS	STY:79.9663@EPHS(0.9265)PADQPEQQAES(0.0148)T(0.0148)LT(0.0148)S(0.0148)AET(0.0144)R;
EPPRASPPGGLAEPPGSAGPQAGPTVVPGSATPMETGIAETPEGR	EPPRAS[79.9663]PPGGLAEPPGSAGPQAGPTVVPGSATPMETGIAETPEGR	K	R	64	108	45	4	6S(79.9663)	sp|O60341|KDM1A_HUMAN	O60341	KDM1A_HUMAN	KDM1A	Lysine-specific histone demethylase 1A		sp|O60341-2|KDM1A_HUMAN	1	0	MS/MS	STY:79.9663@EPPRAS(0.4049)PPGGLAEPPGS(0.4049)AGPQAGPT(0.0324)VVPGS(0.0324)AT(0.0324)PMET(0.0154)GIAET(0.0776)PEGR;
EPVADEEEEDSDDDVEPITEFR	EPVADEEEEDSDDDVEPIT[79.9663]EFR	K	F	92	113	22	3	19T(79.9663)	sp|P54105|ICLN_HUMAN	P54105	ICLN_HUMAN	CLNS1A	Methylosome subunit pICln			1	0	MS/MS	STY:79.9663@EPVADEEEEDS(0.2158)DDDVEPIT(0.7842)EFR;
EPVADEEEEDSDDDVEPITEFR	EPVADEEEEDS[79.9663]DDDVEPITEFR	K	F	92	113	22	3	11S(79.9663)	sp|P54105|ICLN_HUMAN	P54105	ICLN_HUMAN	CLNS1A	Methylosome subunit pICln			5	1.6842316E7	MS/MS	STY:79.9663@EPVADEEEEDS(0.8940)DDDVEPIT(0.1060)EFR;
EQEESLGSPVHHSPFDAQTTGDGTEDPSLTALR	EQEESLGSPVHHSPFDAQTTGDGTEDPSLT[79.9663]ALR	K	M	428	460	33	4	30T(79.9663)	sp|Q9NP74-2|PALMD_HUMAN	Q9NP74-2	PALMD_HUMAN	PALMD	Isoform 2 of Palmdelphin		sp|Q9NP74-3|PALMD_HUMAN, sp|Q9NP74|PALMD_HUMAN	1	6261735	MS/MS	STY:79.9663@EQEES(0.0719)LGS(0.1558)PVHHS(0.0977)PFDAQT(0.2069)T(0.0098)GDGT(0.0098)EDPS(0.0098)LT(0.4383)ALR;
EQEESLGSPVHHSPFDAQTTGDGTEDPSLTALR	EQEESLGSPVHHSPFDAQT[79.9663]TGDGTEDPSLTALR	K	M	428	460	33	3	19T(79.9663)	sp|Q9NP74-2|PALMD_HUMAN	Q9NP74-2	PALMD_HUMAN	PALMD	Isoform 2 of Palmdelphin		sp|Q9NP74-3|PALMD_HUMAN, sp|Q9NP74|PALMD_HUMAN	1	0	MS/MS	STY:79.9663@EQEES(0.2169)LGS(0.0389)PVHHS(0.0478)PFDAQT(0.3394)T(0.3394)GDGT(0.0056)EDPS(0.0056)LT(0.0065)ALR;
EQGTESRSSTPLPTISSSAENTR	EQGTES[79.9663]RS[79.9663]STPLPTISSSAENTR	R	Q	151	173	23	3	6S(79.9663),8S(79.9663)	sp|P42167-2|LAP2B_HUMAN	P42167-2	LAP2B_HUMAN	TMPO	Isoform Gamma of Lamina-associated polypeptide 2, isoforms beta/gamma		sp|P42166|LAP2A_HUMAN, sp|P42167-3|LAP2B_HUMAN, sp|P42167|LAP2B_HUMAN	1	4599857	MS/MS	STY:79.9663@EQGT(0.2315)ES(0.4294)RS(0.4294)S(0.4294)T(0.4294)PLPT(0.0098)IS(0.0104)S(0.0103)S(0.0102)AENT(0.0102)R;
EQHNVSPRDSAEGNDSYPSGIHLELQR	EQHNVSPRDS[79.9663]AEGNDS[79.9663]YPSGIHLELQR	K	E	7	33	27	4	10S(79.9663),16S(79.9663)	sp|P50443|S26A2_HUMAN	P50443	S26A2_HUMAN	SLC26A2	Sulfate transporter			1	2.33341e+06	MS/MS	STY:79.9663@EQHNVS(0.0703)PRDS(0.6217)AEGNDS(0.6217)Y(0.6217)PS(0.0647)GIHLELQR;
EQLSETEGSGEDEPGNDPSETTQK	EQLSET[79.9663]EGS[79.9663]GEDEPGNDPSETTQK	K	K	625	648	24	3	6T(79.9663),9S(79.9663)	sp|Q13107-2|UBP4_HUMAN	Q13107-2	UBP4_HUMAN	USP4	Isoform 2 of Ubiquitin carboxyl-terminal hydrolase 4		sp|Q13107|UBP4_HUMAN	1	0	MS/MS	STY:79.9663@EQLS(0.0185)ET(0.3963)EGS(0.3963)GEDEPGNDPS(0.3963)ET(0.3963)T(0.3963)QK;
EQLSETEGSGEDEPGNDPSETTQKK	EQLS[79.9663]ET[79.9663]EGSGEDEPGNDPSETTQKK	K	I	625	649	25	3	4S(79.9663),6T(79.9663)	sp|Q13107-2|UBP4_HUMAN	Q13107-2	UBP4_HUMAN	USP4	Isoform 2 of Ubiquitin carboxyl-terminal hydrolase 4		sp|Q13107|UBP4_HUMAN	1	0	MS/MS	STY:79.9663@EQLS(0.6329)ET(0.6329)EGS(0.6329)GEDEPGNDPS(0.0337)ET(0.0337)T(0.0337)QKK;
EQLSTSEENSK	EQLS[79.9663]TSEENS[79.9663]K	R	K	141	151	11	2	10S(79.9663),4S(79.9663)	sp|P02663|CASA2_BOVIN	P02663	CASA2_BOVIN	CSN1S2	Alpha-S2-casein			1	2.45335e+06	MS/MS	STY:79.9663@EQLS(0.4908)T(0.4908)S(0.4908)EENS(0.5276)K;
EQLSTSEENSK	EQLS[79.9663]T[79.9663]SEENSK	R	K	141	151	11	2	4S(79.9663),5T(79.9663)	sp|P02663|CASA2_BOVIN	P02663	CASA2_BOVIN	CSN1S2	Alpha-S2-casein			1	0	MS/MS	STY:79.9663@EQLS(0.6355)T(0.6355)S(0.6355)EENS(0.0935)K;
EQPEMEDANSEK	EQPEMEDANS[79.9663]EK	R	S	11	22	12	2	10S(79.9663)	sp|Q13523|PRP4B_HUMAN	Q13523	PRP4B_HUMAN	PRPF4B	Serine/threonine-protein kinase PRP4 homolog			2	8495755	MS/MS	STY:79.9663@EQPEMEDANS(1.0000)EK;
EQPEMEDANSEKSINEENGEVSEDQSQNK	EQPEMEDANS[79.9663]EKS[79.9663]INEENGEVSEDQSQNK	R	H	11	39	29	3	10S(79.9663),13S(79.9663)	sp|Q13523|PRP4B_HUMAN	Q13523	PRP4B_HUMAN	PRPF4B	Serine/threonine-protein kinase PRP4 homolog			1	6835840	MS/MS	STY:79.9663@EQPEMEDANS(0.5622)EKS(0.5622)INEENGEVS(0.4378)EDQS(0.4378)QNK;
EQSEVSVSPR	EQS[79.9663]EVSVSPR	K	A	25	34	10	2	3S(79.9663)	sp|Q7L4I2|RSRC2_HUMAN	Q7L4I2	RSRC2_HUMAN	RSRC2	Arginine/serine-rich coiled-coil protein 2			1	1.3623685E7	MS/MS	STY:79.9663@EQS(0.9398)EVS(0.0301)VS(0.0301)PR;
EQSEVSVSPR	EQS[79.9663]EVSVS[79.9663]PR	K	A	25	34	10	2	3S(79.9663),8S(79.9663)	sp|Q7L4I2|RSRC2_HUMAN	Q7L4I2	RSRC2_HUMAN	RSRC2	Arginine/serine-rich coiled-coil protein 2			1	3.67815e+06	MS/MS	STY:79.9663@EQS(0.6569)EVS(0.6569)VS(0.6862)PR;
ERDHSPTPSVFNSDEER	ERDHS[79.9663]PTPSVFNSDEER	R	Y	414	430	17	3	5S(79.9663)	sp|Q6UN15-3|FIP1_HUMAN	Q6UN15-3	FIP1_HUMAN	FIP1L1	Isoform 3 of Pre-mRNA 3'-end-processing factor FIP1		sp|Q6UN15-5|FIP1_HUMAN, sp|Q6UN15|FIP1_HUMAN	3	1.3017547E7	MS/MS	STY:79.9663@ERDHS(0.8834)PT(0.0560)PS(0.0407)VFNS(0.0198)DEER;
ERDKEVSDDEAEEK	ERDKEVS[79.9663]DDEAEEK	K	E	347	360	14	2	7S(79.9663)	sp|P07900-2|HS90A_HUMAN	P07900-2	HS90A_HUMAN	HSP90AA1	Isoform 2 of Heat shock protein HSP 90-alpha		sp|P07900|HS90A_HUMAN	1	0	MS/MS	STY:79.9663@ERDKEVS(1.0000)DDEAEEK;
ERDSELSDTDSGCCLGQSESDK	ERDS[79.9663]ELS[79.9663]DTDSGC[57.0215]C[57.0215]LGQSESDK	K	S	98	119	22	3	13C(57.0215),14C(57.0215),4S(79.9663),7S(79.9663)	sp|Q96T88-2|UHRF1_HUMAN	Q96T88-2	UHRF1_HUMAN	UHRF1	Isoform 2 of E3 ubiquitin-protein ligase UHRF1		sp|Q96T88|UHRF1_HUMAN	1	2954695	MS/MS	STY:79.9663@ERDS(0.3333)ELS(0.3333)DT(0.3333)DS(0.3333)GCCLGQS(0.3333)ES(0.3333)DK;
EREAANEAGDSSQDEAEDDVK	EREAANEAGDS[79.9663]S[79.9663]QDEAEDDVK	R	Q	151	171	21	3	11S(79.9663),12S(79.9663)	sp|Q9NVU0-2|RPC5_HUMAN	Q9NVU0-2	RPC5_HUMAN	POLR3E	Isoform 2 of DNA-directed RNA polymerase III subunit RPC5		sp|Q9NVU0-3|RPC5_HUMAN, sp|Q9NVU0-4|RPC5_HUMAN, sp|Q9NVU0-5|RPC5_HUMAN, sp|Q9NVU0|RPC5_HUMAN	1	0	MS/MS	STY:79.9663@EREAANEAGDS(1.0000)S(1.0000)QDEAEDDVK;
ERECSPSSPLPPLPEDEEGSEVTNSK	EREC[57.0215]S[79.9663]PS[79.9663]SPLPPLPEDEEGSEVTNSK	R	S	131	156	26	3	4C(57.0215),5S(79.9663),7S(79.9663)	sp|Q96GY3|LIN37_HUMAN	Q96GY3	LIN37_HUMAN	LIN37	Protein lin-37 homolog			1	0	MS/MS	STY:79.9663@ERECS(0.3928)PS(0.3928)S(0.3928)PLPPLPEDEEGS(0.3928)EVT(0.3928)NS(0.0362)K;
EREESEDELEEANGNNPIDIEVDQNK	EREES[79.9663]EDELEEANGNNPIDIEVDQNK	R	E	256	281	26	3	5S(79.9663)	sp|Q9UKL0|RCOR1_HUMAN	Q9UKL0	RCOR1_HUMAN	RCOR1	REST corepressor 1			7	2.346224E7	MS/MS	STY:79.9663@EREES(1.0000)EDELEEANGNNPIDIEVDQNK;
EREPEAASSRGSPVR	EREPEAAS[79.9663]SRGSPVR	R	V	35	49	15	3	8S(79.9663)	sp|Q53GS9-3|SNUT2_HUMAN	Q53GS9-3	SNUT2_HUMAN	USP39	Isoform 3 of U4/U6.U5 tri-snRNP-associated protein 2		sp|Q53GS9|SNUT2_HUMAN	1	1.3589847E7	MS/MS	STY:79.9663@EREPEAAS(0.3333)S(0.3333)RGS(0.3333)PVR;
EREVDEDSEPEREVR	EREVDEDS[79.9663]EPEREVR	R	A	75	89	15	3	8S(79.9663)	sp|Q53GS9-3|SNUT2_HUMAN	Q53GS9-3	SNUT2_HUMAN	USP39	Isoform 3 of U4/U6.U5 tri-snRNP-associated protein 2		sp|Q53GS9|SNUT2_HUMAN	1	2.4863574E7	MS/MS	STY:79.9663@EREVDEDS(1.0000)EPEREVR;
ERFSPPRHELSPPQK	ERFS[79.9663]PPRHELS[79.9663]PPQK	R	R	64	78	15	3	11S(79.9663),4S(79.9663)	sp|Q9BXP5-2|SRRT_HUMAN	Q9BXP5-2	SRRT_HUMAN	SRRT	Isoform 2 of Serrate RNA effector molecule homolog		sp|Q9BXP5-3|SRRT_HUMAN, sp|Q9BXP5-4|SRRT_HUMAN, sp|Q9BXP5-5|SRRT_HUMAN, sp|Q9BXP5|SRRT_HUMAN	4	2.13855552E8	MS/MS	STY:79.9663@ERFS(1.0000)PPRHELS(1.0000)PPQK;
ERIQQFDDGGSDEEDIWEEK	ERIQQFDDGGS[79.9663]DEEDIWEEK	K	H	601	620	20	3	11S(79.9663)	sp|Q5H9R7-2|PP6R3_HUMAN	Q5H9R7-2	PP6R3_HUMAN	PPP6R3	Isoform 2 of Serine/threonine-protein phosphatase 6 regulatory subunit 3		sp|Q5H9R7-3|PP6R3_HUMAN, sp|Q5H9R7-4|PP6R3_HUMAN, sp|Q5H9R7-5|PP6R3_HUMAN, sp|Q5H9R7-6|PP6R3_HUMAN, sp|Q5H9R7|PP6R3_HUMAN	2	7.96729e+06	MS/MS	STY:79.9663@ERIQQFDDGGS(1.0000)DEEDIWEEK;
ERPAEPLTPPPSYGHQPQTGSGESSGASGDK	ERPAEPLTPPPS[79.9663]YGHQPQTGSGESSGASGDK	K	D	9	39	31	3	12S(79.9663)	sp|O43294-2|TGFI1_HUMAN	O43294-2	TGFI1_HUMAN	TGFB1I1	Isoform 2 of Transforming growth factor beta-1-induced transcript 1 protein		sp|O43294|TGFI1_HUMAN	1	8376452	MS/MS	STY:79.9663@ERPAEPLT(0.0164)PPPS(0.4723)Y(0.4723)GHQPQT(0.0078)GS(0.0078)GES(0.0078)S(0.0078)GAS(0.0078)GDK;
ERPAEPLTPPPSYGHQPQTGSGESSGASGDK	ERPAEPLT[79.9663]PPPSYGHQPQTGSGESSGASGDK	K	D	9	39	31	3,4	8T(79.9663)	sp|O43294-2|TGFI1_HUMAN	O43294-2	TGFI1_HUMAN	TGFB1I1	Isoform 2 of Transforming growth factor beta-1-induced transcript 1 protein		sp|O43294|TGFI1_HUMAN	4	2.7593496E7	MS/MS	STY:79.9663@ERPAEPLT(0.9189)PPPS(0.0116)Y(0.0116)GHQPQT(0.0116)GS(0.0116)GES(0.0116)S(0.0116)GAS(0.0116)GDK;
ERPISLGIFPLPAGDGLLTPDAQK	ERPISLGIFPLPAGDGLLT[79.9663]PDAQK	K	G	199	222	24	3	19T(79.9663)	sp|O60271-2|JIP4_HUMAN	O60271-2	JIP4_HUMAN	SPAG9	Isoform 2 of C-Jun-amino-terminal kinase-interacting protein 4		sp|O60271-3|JIP4_HUMAN, sp|O60271-4|JIP4_HUMAN, sp|O60271-5|JIP4_HUMAN, sp|O60271-9|JIP4_HUMAN, sp|O60271|JIP4_HUMAN	1	0	MS/MS	STY:79.9663@ERPIS(0.0777)LGIFPLPAGDGLLT(0.9223)PDAQK;
ERPTPSLNNNCTTSEDSLVLYNR	ERPT[79.9663]PSLNNNC[57.0215]TTSEDSLVLYNR	K	V	734	756	23	3	11C(57.0215),4T(79.9663)	sp|P07814|SYEP_HUMAN	P07814	SYEP_HUMAN	EPRS1	Bifunctional glutamate/proline--tRNA ligase			1	0	MS/MS	STY:79.9663@ERPT(0.4044)PS(0.4044)LNNNCT(0.0590)T(0.0590)S(0.0590)EDS(0.0074)LVLY(0.0069)NR;
ERRTPSDDEEDNLFAPPK	ERRT[79.9663]PS[79.9663]DDEEDNLFAPPK	K	L	328	345	18	3	4T(79.9663),6S(79.9663)	sp|Q641Q2-2|WAC2A_HUMAN	Q641Q2-2	WAC2A_HUMAN	WASHC2A	Isoform 2 of WASH complex subunit 2A	WASHC2C	sp|Q641Q2|WAC2A_HUMAN, sp|Q9Y4E1-1|WAC2C_HUMAN, sp|Q9Y4E1-2|WAC2C_HUMAN, sp|Q9Y4E1-3|WAC2C_HUMAN, sp|Q9Y4E1-4|WAC2C_HUMAN, sp|Q9Y4E1-6|WAC2C_HUMAN, sp|Q9Y4E1|WAC2C_HUMAN	2	8901998	MS/MS	STY:79.9663@ERRT(1.0000)PS(1.0000)DDEEDNLFAPPK;
ERSDSGGSSSEPFDR	ERSDSGGSS[79.9663]S[79.9663]EPFDR	R	H	757	771	15	2	10S(79.9663),9S(79.9663)	sp|P48634|PRC2A_HUMAN	P48634	PRC2A_HUMAN	PRRC2A	Protein PRRC2A		sp|P48634-2|PRC2A_HUMAN, sp|P48634-3|PRC2A_HUMAN, sp|P48634-4|PRC2A_HUMAN	1	4.51537e+06	MS/MS	STY:79.9663@ERS(0.1615)DS(0.2104)GGS(0.3489)S(0.6396)S(0.6396)EPFDR;
ERSPALK	ERS[79.9663]PALK	R	S	246	252	7	2	3S(79.9663)	sp|Q9Y2W1|TR150_HUMAN	Q9Y2W1	TR150_HUMAN	THRAP3	Thyroid hormone receptor-associated protein 3			1	1.31193984E8	MS/MS	STY:79.9663@ERS(1.0000)PALK;
ERSPSPLRGNVVPSPLPTR	ERS[79.9663]PSPLRGNVVPSPLPT[79.9663]R	R	R	28	46	19	3	18T(79.9663),3S(79.9663)	sp|Q9Y2V2|CHSP1_HUMAN	Q9Y2V2	CHSP1_HUMAN	CARHSP1	Calcium-regulated heat-stable protein 1			1	3.2097784E7	MS/MS	STY:79.9663@ERS(0.7034)PS(0.5536)PLRGNVVPS(0.0622)PLPT(0.6809)R;
ERSPSPLRGNVVPSPLPTR	ERS[79.9663]PSPLRGNVVPS[79.9663]PLPT[79.9663]R	R	R	28	46	19	3	14S(79.9663),18T(79.9663),3S(79.9663)	sp|Q9Y2V2|CHSP1_HUMAN	Q9Y2V2	CHSP1_HUMAN	CARHSP1	Calcium-regulated heat-stable protein 1			1	0	MS/MS	STY:79.9663@ERS(0.7391)PS(0.7391)PLRGNVVPS(0.7609)PLPT(0.7609)R;
ERSPSPPTIQSK	ERS[79.9663]PSPPT[79.9663]IQSK	R	R	720	731	12	2	3S(79.9663),8T(79.9663)	sp|Q14687-2|GSE1_HUMAN	Q14687-2	GSE1_HUMAN	GSE1	Isoform 2 of Genetic suppressor element 1		sp|Q14687-3|GSE1_HUMAN, sp|Q14687|GSE1_HUMAN	1	6.32772e+06	MS/MS	STY:79.9663@ERS(0.6136)PS(0.2549)PPT(0.5657)IQS(0.5657)K;
ERSPSPPTIQSK	ERS[79.9663]PS[79.9663]PPTIQSK	R	R	720	731	12	2	3S(79.9663),5S(79.9663)	sp|Q14687-2|GSE1_HUMAN	Q14687-2	GSE1_HUMAN	GSE1	Isoform 2 of Genetic suppressor element 1		sp|Q14687-3|GSE1_HUMAN, sp|Q14687|GSE1_HUMAN	4	1.042503E7	MS/MS	STY:79.9663@ERS(0.6498)PS(0.6498)PPT(0.6498)IQS(0.0505)K;
ERSPSPSFR	ERS[79.9663]PS[79.9663]PSFR	R	W	327	335	9	2	3S(79.9663),5S(79.9663)	sp|P49585|PCY1A_HUMAN	P49585	PCY1A_HUMAN	PCYT1A	Choline-phosphate cytidylyltransferase A			2	6214488	MS/MS	STY:79.9663@ERS(0.8392)PS(0.8373)PS(0.3235)FR;
ESAAPASPAPSPAPSPTPAPPQK	ESAAPAS[79.9663]PAPS[79.9663]PAPS[79.9663]PTPAPPQK	K	E	501	523	23	3	11S(79.9663),15S(79.9663),7S(79.9663)	sp|Q3KQU3-2|MA7D1_HUMAN	Q3KQU3-2	MA7D1_HUMAN	MAP7D1	Isoform 2 of MAP7 domain-containing protein 1		sp|Q3KQU3-3|MA7D1_HUMAN, sp|Q3KQU3-4|MA7D1_HUMAN, sp|Q3KQU3|MA7D1_HUMAN	1	1.1918938E7	MS/MS	STY:79.9663@ES(0.0771)AAPAS(0.7518)PAPS(0.7516)PAPS(0.7098)PT(0.7098)PAPPQK;
ESDKEDGRESPSYDTPSQR	ESDKEDGRESPS[79.9663]YDTPSQR	K	V	80	98	19	3	12S(79.9663)	sp|Q9Y6M7-10|S4A7_HUMAN	Q9Y6M7-10	S4A7_HUMAN	SLC4A7	Isoform 10 of Sodium bicarbonate cotransporter 3		sp|Q9Y6M7-11|S4A7_HUMAN, sp|Q9Y6M7-12|S4A7_HUMAN, sp|Q9Y6M7-13|S4A7_HUMAN, sp|Q9Y6M7-14|S4A7_HUMAN, sp|Q9Y6M7-2|S4A7_HUMAN, sp|Q9Y6M7-6|S4A7_HUMAN, sp|Q9Y6M7-7|S4A7_HUMAN, sp|Q9Y6M7-8|S4A7_HUMAN, sp|Q9Y6M7-9|S4A7_HUMAN, sp|Q9Y6M7|S4A7_HUMAN	1	3.95411e+06	MS/MS	STY:79.9663@ES(0.0398)DKEDGRES(0.0398)PS(0.4426)Y(0.4426)DT(0.0177)PS(0.0177)QR;
ESDKEDGRESPSYDTPSQR	ESDKEDGRES[79.9663]PSYDTPSQR	K	V	80	98	19	3	10S(79.9663)	sp|Q9Y6M7-10|S4A7_HUMAN	Q9Y6M7-10	S4A7_HUMAN	SLC4A7	Isoform 10 of Sodium bicarbonate cotransporter 3		sp|Q9Y6M7-11|S4A7_HUMAN, sp|Q9Y6M7-12|S4A7_HUMAN, sp|Q9Y6M7-13|S4A7_HUMAN, sp|Q9Y6M7-14|S4A7_HUMAN, sp|Q9Y6M7-2|S4A7_HUMAN, sp|Q9Y6M7-6|S4A7_HUMAN, sp|Q9Y6M7-7|S4A7_HUMAN, sp|Q9Y6M7-8|S4A7_HUMAN, sp|Q9Y6M7-9|S4A7_HUMAN, sp|Q9Y6M7|S4A7_HUMAN	1	3.95411e+06	MS/MS	STY:79.9663@ES(0.0134)DKEDGRES(0.3199)PS(0.3199)Y(0.3199)DT(0.0135)PS(0.0135)QR;
ESDQTLAALLSPK	ESDQTLAALLS[79.9663]PK	K	E	1687	1699	13	2	11S(79.9663)	sp|P18583-10|SON_HUMAN	P18583-10	SON_HUMAN	SON	Isoform J of Protein SON		sp|P18583-2|SON_HUMAN, sp|P18583-3|SON_HUMAN, sp|P18583-4|SON_HUMAN, sp|P18583-5|SON_HUMAN, sp|P18583-6|SON_HUMAN, sp|P18583-7|SON_HUMAN, sp|P18583-9|SON_HUMAN, sp|P18583|SON_HUMAN	1	1.6634422E7	MS/MS	STY:79.9663@ES(0.0354)DQT(0.0354)LAALLS(0.9293)PK;
ESDQTLAALLSPK	ESDQT[79.9663]LAALLSPK	K	E	1687	1699	13	2	5T(79.9663)	sp|P18583-10|SON_HUMAN	P18583-10	SON_HUMAN	SON	Isoform J of Protein SON		sp|P18583-2|SON_HUMAN, sp|P18583-3|SON_HUMAN, sp|P18583-4|SON_HUMAN, sp|P18583-5|SON_HUMAN, sp|P18583-6|SON_HUMAN, sp|P18583-7|SON_HUMAN, sp|P18583-9|SON_HUMAN, sp|P18583|SON_HUMAN	1	1.6805044E7	MS/MS	STY:79.9663@ES(0.0322)DQT(0.9222)LAALLS(0.0456)PK;
ESDSDSEGPIQYRDEEDEDESYQSALANK	ESDSDSEGPIQY[79.9663]RDEEDEDESYQSALANK	K	V	523	551	29	3	12Y(79.9663)	sp|Q8IZ21-2|PHAR4_HUMAN	Q8IZ21-2	PHAR4_HUMAN	PHACTR4	Isoform 2 of Phosphatase and actin regulator 4		sp|Q8IZ21-3|PHAR4_HUMAN, sp|Q8IZ21|PHAR4_HUMAN	1	0	MS/MS	STY:79.9663@ES(0.0236)DS(0.0236)DS(0.0236)EGPIQY(0.2323)RDEEDEDES(0.2323)Y(0.2323)QS(0.2323)ALANK;
ESEDKPEIEDVGSDEEEEK	ESEDKPEIEDVGS[79.9663]DEEEEK	K	K	373	391	19	2,3	13S(79.9663)	sp|P07900-2|HS90A_HUMAN	P07900-2	HS90A_HUMAN	HSP90AA1	Isoform 2 of Heat shock protein HSP 90-alpha		sp|P07900|HS90A_HUMAN	9	7.3097395E8	MS/MS	STY:79.9663@ES(0.0576)EDKPEIEDVGS(0.9424)DEEEEK;
ESEDKPEIEDVGSDEEEEKK	ESEDKPEIEDVGS[79.9663]DEEEEKK	K	D	373	392	20	2,3,4	13S(79.9663)	sp|P07900-2|HS90A_HUMAN	P07900-2	HS90A_HUMAN	HSP90AA1	Isoform 2 of Heat shock protein HSP 90-alpha		sp|P07900|HS90A_HUMAN	23	6.2830915E9	MS/MS	STY:79.9663@ES(0.0602)EDKPEIEDVGS(0.9398)DEEEEKK;
ESEEGNPVRGSEEDSPKK	ESEEGNPVRGSEEDS[79.9663]PKK	K	E	484	501	18	2	15S(79.9663)	sp|O43719|HTSF1_HUMAN	O43719	HTSF1_HUMAN	HTATSF1	HIV Tat-specific factor 1			1	0	MS/MS	STY:79.9663@ES(0.0439)EEGNPVRGS(0.0439)EEDS(0.9123)PKK;
ESEQESEEEILAQKK	ESEQES[79.9663]EEEILAQKK	K	E	222	236	15	2	6S(79.9663)	sp|Q9BW71|HIRP3_HUMAN	Q9BW71	HIRP3_HUMAN	HIRIP3	HIRA-interacting protein 3			1	4.63411e+06	MS/MS	STY:79.9663@ES(0.0702)EQES(0.9298)EEEILAQKK;
ESEVCPVPTNSPSPPPLPPPPPLPK	ESEVC[57.0215]PVPT[79.9663]NS[79.9663]PSPPPLPPPPPLPK	K	I	770	794	25	3	11S(79.9663),5C(57.0215),9T(79.9663)	sp|Q9ULJ3-2|ZBT21_HUMAN	Q9ULJ3-2	ZBT21_HUMAN	ZBTB21	Isoform 2 of Zinc finger and BTB domain-containing protein 21		sp|Q9ULJ3|ZBT21_HUMAN	1	3645640	MS/MS	STY:79.9663@ES(0.4923)EVCPVPT(0.5026)NS(0.5026)PS(0.5026)PPPLPPPPPLPK;
ESKEEETSIDVAGKPNEVTK	ESKEEET[79.9663]SIDVAGKPNEVTK	K	A	460	479	20	3	7T(79.9663)	sp|P53985|MOT1_HUMAN	P53985	MOT1_HUMAN	SLC16A1	Monocarboxylate transporter 1			1	1.083939E7	MS/MS	STY:79.9663@ES(0.0370)KEEET(0.3210)S(0.3210)IDVAGKPNEVT(0.3210)K;
ESLKEEDESDDDNM	ESLKEEDES[79.9663]DDDNM	K	-	235	248	14	2	9S(79.9663)	sp|P25788-2|PSA3_HUMAN	P25788-2	PSA3_HUMAN	PSMA3	Isoform 2 of Proteasome subunit alpha type-3		sp|P25788|PSA3_HUMAN	8	2.33561312E8	MS/MS	STY:79.9663@ES(0.0753)LKEEDES(0.9247)DDDNM;
ESLKEEDESDDDNM	ESLKEEDES[79.9663]DDDNM[15.9949]	K	-	235	248	14	2	14M(15.9949),9S(79.9663)	sp|P25788-2|PSA3_HUMAN	P25788-2	PSA3_HUMAN	PSMA3	Isoform 2 of Proteasome subunit alpha type-3		sp|P25788|PSA3_HUMAN	4	6.4912404E7	MS/MS	STY:79.9663@ES(0.0681)LKEEDES(0.9319)DDDNM;M:15.9949@ESLKEEDESDDDNM(1.0000);
ESPRPLQLPGAEGPAISDGEEGGGEPGAGGGAAGAAGAGR	ESPRPLQLPGAEGPAIS[79.9663]DGEEGGGEPGAGGGAAGAAGAGR	R	R	74	113	40	3,4	17S(79.9663)	sp|Q6PKG0|LARP1_HUMAN	Q6PKG0	LARP1_HUMAN	LARP1	La-related protein 1			2	1.5963765E7	MS/MS	STY:79.9663@ES(0.2252)PRPLQLPGAEGPAIS(0.7748)DGEEGGGEPGAGGGAAGAAGAGR;
ESPRPLQLPGAEGPAISDGEEGGGEPGAGGGAAGAAGAGRR	ESPRPLQLPGAEGPAIS[79.9663]DGEEGGGEPGAGGGAAGAAGAGRR	R	D	74	114	41	4	17S(79.9663)	sp|Q6PKG0|LARP1_HUMAN	Q6PKG0	LARP1_HUMAN	LARP1	La-related protein 1			1	7384289	MS/MS	STY:79.9663@ES(0.2062)PRPLQLPGAEGPAIS(0.7938)DGEEGGGEPGAGGGAAGAAGAGRR;
ESSANNSVSPSESLR	ESSANNSVSPSES[79.9663]LR	R	A	195	209	15	2	13S(79.9663)	sp|Q04726-2|TLE3_HUMAN	Q04726-2	TLE3_HUMAN	TLE3	Isoform 2 of Transducin-like enhancer protein 3		sp|Q04726-3|TLE3_HUMAN, sp|Q04726-4|TLE3_HUMAN, sp|Q04726-5|TLE3_HUMAN, sp|Q04726-6|TLE3_HUMAN, sp|Q04726-7|TLE3_HUMAN, sp|Q04726|TLE3_HUMAN	1	0	MS/MS	STY:79.9663@ES(0.0278)S(0.0278)ANNS(0.0598)VS(0.0598)PS(0.0598)ES(0.7649)LR;
ESSANNSVSPSESLR	ESSANNSVS[79.9663]PSESLR	R	A	195	209	15	2	9S(79.9663)	sp|Q04726-2|TLE3_HUMAN	Q04726-2	TLE3_HUMAN	TLE3	Isoform 2 of Transducin-like enhancer protein 3		sp|Q04726-3|TLE3_HUMAN, sp|Q04726-4|TLE3_HUMAN, sp|Q04726-5|TLE3_HUMAN, sp|Q04726-6|TLE3_HUMAN, sp|Q04726-7|TLE3_HUMAN, sp|Q04726|TLE3_HUMAN	2	9615435	MS/MS	STY:79.9663@ES(0.1074)S(0.1074)ANNS(0.0125)VS(0.7021)PS(0.0353)ES(0.0353)LR;
ESSTSEGADQKMSSPEDDSDTK	ESSTSEGADQKMS[79.9663]S[79.9663]PEDDSDTK	K	R	302	323	22	3	13S(79.9663),14S(79.9663)	sp|Q15424-2|SAFB1_HUMAN	Q15424-2	SAFB1_HUMAN	SAFB	Isoform 2 of Scaffold attachment factor B1		sp|Q15424-3|SAFB1_HUMAN, sp|Q15424-4|SAFB1_HUMAN, sp|Q15424|SAFB1_HUMAN	1	7583952	MS/MS	STY:79.9663@ES(0.0612)S(0.0612)T(0.0612)S(0.0612)EGADQKMS(0.8534)S(0.8534)PEDDS(0.0241)DT(0.0241)K;
ESVPEFPLSPPK	ESVPEFPLS[79.9663]PPK	K	K	30	41	12	2	9S(79.9663)	sp|P16949-2|STMN1_HUMAN	P16949-2	STMN1_HUMAN	STMN1	Isoform 2 of Stathmin		sp|P16949|STMN1_HUMAN	6	6.312436E7	MS/MS	STY:79.9663@ES(0.0611)VPEFPLS(0.9389)PPK;
ESYTEEIVSEAESHVSGISR	ESYTEEIVS[79.9663]EAESHVSGISR	K	I	133	152	20	3	9S(79.9663)	sp|Q5QJE6|TDIF2_HUMAN	Q5QJE6	TDIF2_HUMAN	DNTTIP2	Deoxynucleotidyltransferase terminal-interacting protein 2			1	2.00802e+06	MS/MS	STY:79.9663@ES(0.1097)Y(0.1097)T(0.1097)EEIVS(0.1677)EAES(0.1677)HVS(0.1677)GIS(0.1677)R;
ESAAPASPAPSPAPSPTPAPPQK	ES[79.9663]AAPASPAPSPAPS[79.9663]PT[79.9663]PAPPQK	K	E	501	523	23	3	15S(79.9663),17T(79.9663),2S(79.9663)	sp|Q3KQU3-2|MA7D1_HUMAN	Q3KQU3-2	MA7D1_HUMAN	MAP7D1	Isoform 2 of MAP7 domain-containing protein 1		sp|Q3KQU3-3|MA7D1_HUMAN, sp|Q3KQU3-4|MA7D1_HUMAN, sp|Q3KQU3|MA7D1_HUMAN	1	1.1583508E7	MS/MS	STY:79.9663@ES(0.6626)AAPAS(0.6401)PAPS(0.3214)PAPS(0.6879)PT(0.6879)PAPPQK;
ESEDKPEIEDVGSDEEEEK	ES[79.9663]EDKPEIEDVGSDEEEEK	K	K	373	391	19	2,3	2S(79.9663)	sp|P07900-2|HS90A_HUMAN	P07900-2	HS90A_HUMAN	HSP90AA1	Isoform 2 of Heat shock protein HSP 90-alpha		sp|P07900|HS90A_HUMAN	3	1.16421816E8	MS/MS	STY:79.9663@ES(0.8983)EDKPEIEDVGS(0.1017)DEEEEK;
ESEDKPEIEDVGSDEEEEKK	ES[79.9663]EDKPEIEDVGSDEEEEKK	K	D	373	392	20	3	2S(79.9663)	sp|P07900-2|HS90A_HUMAN	P07900-2	HS90A_HUMAN	HSP90AA1	Isoform 2 of Heat shock protein HSP 90-alpha		sp|P07900|HS90A_HUMAN	3	6.1385334E9	MS/MS	STY:79.9663@ES(0.6945)EDKPEIEDVGS(0.3055)DEEEEKK;
ESEQESEEEILAQK	ES[79.9663]EQESEEEILAQK	K	K	222	235	14	2	2S(79.9663)	sp|Q9BW71|HIRP3_HUMAN	Q9BW71	HIRP3_HUMAN	HIRIP3	HIRA-interacting protein 3			1	0	MS/MS	STY:79.9663@ES(0.6466)EQES(0.3534)EEEILAQK;
ESEQESEEEILAQKK	ES[79.9663]EQESEEEILAQKK	K	E	222	236	15	3	2S(79.9663)	sp|Q9BW71|HIRP3_HUMAN	Q9BW71	HIRP3_HUMAN	HIRIP3	HIRA-interacting protein 3			1	0	MS/MS	STY:79.9663@ES(0.5000)EQES(0.5000)EEEILAQKK;
ESKEEETSIDVAGKPNEVTK	ES[79.9663]KEEETSIDVAGKPNEVTK	K	A	460	479	20	3	2S(79.9663)	sp|P53985|MOT1_HUMAN	P53985	MOT1_HUMAN	SLC16A1	Monocarboxylate transporter 1			1	1.083939E7	MS/MS	STY:79.9663@ES(0.3026)KEEET(0.3026)S(0.3026)IDVAGKPNEVT(0.0922)K;
ESLKEEDESDDDNM	ES[79.9663]LKEEDESDDDNM	K	-	235	248	14	2	2S(79.9663)	sp|P25788-2|PSA3_HUMAN	P25788-2	PSA3_HUMAN	PSMA3	Isoform 2 of Proteasome subunit alpha type-3		sp|P25788|PSA3_HUMAN	3	2.33561312E8	MS/MS	STY:79.9663@ES(0.9160)LKEEDES(0.0840)DDDNM;
ESLKEEDESDDDNM	ES[79.9663]LKEEDESDDDNM[15.9949]	K	-	235	248	14	2	14M(15.9949),2S(79.9663)	sp|P25788-2|PSA3_HUMAN	P25788-2	PSA3_HUMAN	PSMA3	Isoform 2 of Proteasome subunit alpha type-3		sp|P25788|PSA3_HUMAN	4	4.665134E7	MS/MS	STY:79.9663@ES(0.9314)LKEEDES(0.0686)DDDNM;M:15.9949@ESLKEEDESDDDNM(1.0000);
ESLSTHTSPSQSPNSVHGSR	ES[79.9663]LS[79.9663]THTSPSQSPNSVHGSR	K	R	208	227	20	3	2S(79.9663),4S(79.9663)	sp|Q9H1K0|RBNS5_HUMAN	Q9H1K0	RBNS5_HUMAN	RBSN	Rabenosyn-5			1	2.72456e+06	MS/MS	STY:79.9663@ES(0.2222)LS(0.2222)T(0.2222)HT(0.2222)S(0.2222)PS(0.2222)QS(0.2222)PNS(0.2222)VHGS(0.2222)R;
ESPRPLQLPGAEGPAISDGEEGGGEPGAGGGAAGAAGAGR	ES[79.9663]PRPLQLPGAEGPAISDGEEGGGEPGAGGGAAGAAGAGR	R	R	74	113	40	3	2S(79.9663)	sp|Q6PKG0|LARP1_HUMAN	Q6PKG0	LARP1_HUMAN	LARP1	La-related protein 1			1	1.7694906E7	MS/MS	STY:79.9663@ES(0.5169)PRPLQLPGAEGPAIS(0.4831)DGEEGGGEPGAGGGAAGAAGAGR;
ESQLAHIKDEPPPLSPAPLTPATPSSLDPFFSR	ES[79.9663]QLAHIKDEPPPLSPAPLTPATPSSLDPFFSR	R	E	3889	3921	33	4	2S(79.9663)	sp|Q7Z6Z7-2|HUWE1_HUMAN	Q7Z6Z7-2	HUWE1_HUMAN	HUWE1	Isoform 2 of E3 ubiquitin-protein ligase HUWE1		sp|Q7Z6Z7-3|HUWE1_HUMAN, sp|Q7Z6Z7|HUWE1_HUMAN	1	0	MS/MS	STY:79.9663@ES(0.1633)QLAHIKDEPPPLS(0.1633)PAPLT(0.1633)PAT(0.1633)PS(0.1633)S(0.1633)LDPFFS(0.0205)R;
ESRQESDPEDDDVK	ES[79.9663]RQESDPEDDDVK	R	K	95	108	14	2,3	2S(79.9663)	sp|Q9H307|PININ_HUMAN	Q9H307	PININ_HUMAN	PNN	Pinin			3	1.6968406E7	MS/MS	STY:79.9663@ES(0.7692)RQES(0.2308)DPEDDDVK;
ESSPIPSPTSDRK	ES[79.9663]SPIPSPTSDRK	K	A	2163	2175	13	2	2S(79.9663)	sp|Q01082|SPTB2_HUMAN	Q01082	SPTB2_HUMAN	SPTBN1	Spectrin beta chain, non-erythrocytic 1			1	0	MS/MS	STY:79.9663@ES(0.4819)S(0.4819)PIPS(0.0121)PT(0.0121)S(0.0121)DRK;
ESSPLYSPTFSDSTSAVK	ES[79.9663]SPLYSPTFSDSTSAVK	R	E	1791	1808	18	2	2S(79.9663)	sp|P46821|MAP1B_HUMAN	P46821	MAP1B_HUMAN	MAP1B	Microtubule-associated protein 1B			2	9148771	MS/MS	STY:79.9663@ES(0.4025)S(0.4025)PLY(0.0334)S(0.0334)PT(0.0334)FS(0.0089)DS(0.0287)T(0.0287)S(0.0287)AVK;
ESSPLYSPTFSDSTSAVK	ES[79.9663]SPLYSPT[79.9663]FSDSTSAVK	R	E	1791	1808	18	2	2S(79.9663),9T(79.9663)	sp|P46821|MAP1B_HUMAN	P46821	MAP1B_HUMAN	MAP1B	Microtubule-associated protein 1B			1	0	MS/MS	STY:79.9663@ES(0.3516)S(0.0147)PLY(0.1079)S(0.1079)PT(0.2836)FS(0.2836)DS(0.2836)T(0.2836)S(0.2836)AVK;
ESSPLYSPTFSDSTSAVK	ES[79.9663]SPLY[79.9663]SPTFSDSTSAVK	R	E	1791	1808	18	2	2S(79.9663),6Y(79.9663)	sp|P46821|MAP1B_HUMAN	P46821	MAP1B_HUMAN	MAP1B	Microtubule-associated protein 1B			1	0	MS/MS	STY:79.9663@ES(0.5403)S(0.5403)PLY(0.6969)S(0.0392)PT(0.0438)FS(0.0438)DS(0.0340)T(0.0340)S(0.0277)AVK;
ESSPIPSPTSDR	ES[79.9663]S[79.9663]PIPSPTSDR	K	K	2163	2174	12	2	2S(79.9663),3S(79.9663)	sp|Q01082|SPTB2_HUMAN	Q01082	SPTB2_HUMAN	SPTBN1	Spectrin beta chain, non-erythrocytic 1			1	1.0166623E7	MS/MS	STY:79.9663@ES(0.4000)S(0.4000)PIPS(0.4000)PT(0.4000)S(0.4000)DR;
ESSPIPSPTSDRK	ES[79.9663]S[79.9663]PIPSPTSDRK	K	A	2163	2175	13	2	2S(79.9663),3S(79.9663)	sp|Q01082|SPTB2_HUMAN	Q01082	SPTB2_HUMAN	SPTBN1	Spectrin beta chain, non-erythrocytic 1			5	1.14591584E8	MS/MS	STY:79.9663@ES(0.4231)S(0.4231)PIPS(0.3846)PT(0.3846)S(0.3846)DRK;
ESSTSEGADQKMSSPEDDSDTK	ES[79.9663]S[79.9663]TSEGADQKM[15.9949]SSPEDDSDTK	K	R	302	323	22	3	12M(15.9949),2S(79.9663),3S(79.9663)	sp|Q15424-2|SAFB1_HUMAN	Q15424-2	SAFB1_HUMAN	SAFB	Isoform 2 of Scaffold attachment factor B1		sp|Q15424-3|SAFB1_HUMAN, sp|Q15424-4|SAFB1_HUMAN, sp|Q15424|SAFB1_HUMAN	2	0	MS/MS	STY:79.9663@ES(0.3234)S(0.3234)T(0.3234)S(0.3234)EGADQKMS(0.3234)S(0.3234)PEDDS(0.0298)DT(0.0298)K;M:15.9949@ESSTSEGADQKM(1.0000)SSPEDDSDTK;
ESTQLSPADLTEGKPTDPSK	ES[79.9663]TQLSPADLTEGKPTDPSK	R	L	451	470	20	3	2S(79.9663)	sp|Q08J23|NSUN2_HUMAN	Q08J23	NSUN2_HUMAN	NSUN2	RNA cytosine C(5)-methyltransferase NSUN2		sp|Q08J23-2|NSUN2_HUMAN, sp|Q08J23-3|NSUN2_HUMAN	2	1.8335918E7	MS/MS	STY:79.9663@ES(0.3189)T(0.3189)QLS(0.3189)PADLT(0.0144)EGKPT(0.0144)DPS(0.0144)K;
ESVPEFPLSPPK	ES[79.9663]VPEFPLSPPK	K	K	30	41	12	2	2S(79.9663)	sp|P16949-2|STMN1_HUMAN	P16949-2	STMN1_HUMAN	STMN1	Isoform 2 of Stathmin		sp|P16949|STMN1_HUMAN	1	0	MS/MS	STY:79.9663@ES(0.5000)VPEFPLS(0.5000)PPK;
ESYTEEIVSEAESHVSGISR	ES[79.9663]YTEEIVSEAESHVSGISR	K	I	133	152	20	3	2S(79.9663)	sp|Q5QJE6|TDIF2_HUMAN	Q5QJE6	TDIF2_HUMAN	DNTTIP2	Deoxynucleotidyltransferase terminal-interacting protein 2			1	2.00802e+06	MS/MS	STY:79.9663@ES(0.1496)Y(0.1496)T(0.1496)EEIVS(0.1496)EAES(0.1496)HVS(0.1496)GIS(0.1024)R;
ETDEAAFEPDYNESDSESNVSVKEEESSGNISK	ETDEAAFEPDYNES[79.9663]DS[79.9663]ES[79.9663]NVSVKEEESSGNISK	R	D	1597	1629	33	3	14S(79.9663),16S(79.9663),18S(79.9663)	sp|Q7Z6E9-2|RBBP6_HUMAN	Q7Z6E9-2	RBBP6_HUMAN	RBBP6	Isoform 2 of E3 ubiquitin-protein ligase RBBP6		sp|Q7Z6E9-4|RBBP6_HUMAN, sp|Q7Z6E9|RBBP6_HUMAN	1	1.0310012E7	MS/MS	STY:79.9663@ET(0.2388)DEAAFEPDY(0.3036)NES(0.3511)DS(0.3511)ES(0.3511)NVS(0.3511)VKEEES(0.3511)S(0.3511)GNIS(0.3511)K;
ETEEQDSDSAEQGDPAGEGK	ETEEQDS[79.9663]DSAEQGDPAGEGK	R	E	54	73	20	2	7S(79.9663)	sp|O95361|TRI16_HUMAN	O95361	TRI16_HUMAN	TRIM16	Tripartite motif-containing protein 16			2	1.9132984E7	MS/MS	STY:79.9663@ET(0.2124)EEQDS(0.7372)DS(0.0505)AEQGDPAGEGK;
ETESAPGSPR	ETES[79.9663]APGS[79.9663]PR	K	A	514	523	10	2	4S(79.9663),8S(79.9663)	sp|Q6PKG0|LARP1_HUMAN	Q6PKG0	LARP1_HUMAN	LARP1	La-related protein 1		sp|Q6PKG0-3|LARP1_HUMAN	1	2.9909948E7	MS/MS	STY:79.9663@ET(0.1345)ES(0.9327)APGS(0.9327)PR;
ETNLDSLPLVDTHSK	ETNLDS[79.9663]LPLVDTHSK	R	R	425	439	15	2	6S(79.9663)	sp|P08670|VIME_HUMAN	P08670	VIME_HUMAN	VIM	Vimentin			2	9533471	MS/MS	STY:79.9663@ET(0.0318)NLDS(0.9164)LPLVDT(0.0205)HS(0.0314)K;
ETPAATEAPSSTPK	ETPAATEAPS[79.9663]STPK	K	A	185	198	14	2	10S(79.9663)	sp|P80723|BASP1_HUMAN	P80723	BASP1_HUMAN	BASP1	Brain acid soluble protein 1		sp|P80723-2|BASP1_HUMAN	1	1.6295742E7	MS/MS	STY:79.9663@ET(0.0118)PAAT(0.0603)EAPS(0.3093)S(0.3093)T(0.3093)PK;
ETPAATEAPSSTPK	ETPAAT[79.9663]EAPSSTPK	K	A	185	198	14	2	6T(79.9663)	sp|P80723|BASP1_HUMAN	P80723	BASP1_HUMAN	BASP1	Brain acid soluble protein 1		sp|P80723-2|BASP1_HUMAN	1	1.6295742E7	MS/MS	STY:79.9663@ET(0.0059)PAAT(0.2485)EAPS(0.2485)S(0.2485)T(0.2485)PK;
ETPHSPGVEDAPIAK	ETPHS[79.9663]PGVEDAPIAK	R	V	326	340	15	2	5S(79.9663)	sp|Q9UHB6-2|LIMA1_HUMAN	Q9UHB6-2	LIMA1_HUMAN	LIMA1	Isoform Alpha of LIM domain and actin-binding protein 1		sp|Q9UHB6-3|LIMA1_HUMAN, sp|Q9UHB6-4|LIMA1_HUMAN, sp|Q9UHB6-5|LIMA1_HUMAN, sp|Q9UHB6|LIMA1_HUMAN	4	3.7781504E7	MS/MS	STY:79.9663@ET(0.0574)PHS(0.9426)PGVEDAPIAK;
ETQSPEQVK	ETQS[79.9663]PEQVK	K	S	491	499	9	2	4S(79.9663)	sp|Q9NYF8-2|BCLF1_HUMAN	Q9NYF8-2	BCLF1_HUMAN	BCLAF1	Isoform 2 of Bcl-2-associated transcription factor 1		sp|Q9NYF8-3|BCLF1_HUMAN, sp|Q9NYF8|BCLF1_HUMAN	1	1.9405366E7	MS/MS	STY:79.9663@ET(0.0591)QS(0.9409)PEQVK;
ETSVSKEDTDHEEKASNEDVTK	ETSVS[79.9663]KEDTDHEEKAS[79.9663]NEDVTK	K	A	114	135	22	3	16S(79.9663),5S(79.9663)	sp|O75475-2|PSIP1_HUMAN	O75475-2	PSIP1_HUMAN	PSIP1	Isoform 2 of PC4 and SFRS1-interacting protein		sp|O75475-3|PSIP1_HUMAN, sp|O75475|PSIP1_HUMAN	1	4.1039692E7	MS/MS	STY:79.9663@ET(0.0287)S(0.0287)VS(0.8263)KEDT(0.0472)DHEEKAS(0.8062)NEDVT(0.2628)K;
ETEEQDSDSAEQGDPAGEGK	ET[79.9663]EEQDSDSAEQGDPAGEGK	R	E	54	73	20	2	2T(79.9663)	sp|O95361|TRI16_HUMAN	O95361	TRI16_HUMAN	TRIM16	Tripartite motif-containing protein 16			2	1.9323386E7	MS/MS	STY:79.9663@ET(0.8966)EEQDS(0.0555)DS(0.0480)AEQGDPAGEGK;
ETESAPGSPR	ET[79.9663]ESAPGSPR	K	A	514	523	10	2	2T(79.9663)	sp|Q6PKG0|LARP1_HUMAN	Q6PKG0	LARP1_HUMAN	LARP1	La-related protein 1		sp|Q6PKG0-3|LARP1_HUMAN	1	2776258	MS/MS	STY:79.9663@ET(0.4880)ES(0.4880)APGS(0.0239)PR;
ETESEAEDNLDDLEK	ET[79.9663]ESEAEDNLDDLEK	K	H	871	885	15	2	2T(79.9663)	sp|Q8IYB3|SRRM1_HUMAN	Q8IYB3	SRRM1_HUMAN	SRRM1	Serine/arginine repetitive matrix protein 1		sp|Q8IYB3-2|SRRM1_HUMAN	1	0	MS/MS	STY:79.9663@ET(0.5000)ES(0.5000)EAEDNLDDLEK;
ETPAATEAPSSTPK	ET[79.9663]PAATEAPSSTPK	K	A	185	198	14	2	2T(79.9663)	sp|P80723|BASP1_HUMAN	P80723	BASP1_HUMAN	BASP1	Brain acid soluble protein 1		sp|P80723-2|BASP1_HUMAN	1	1.6295742E7	MS/MS	STY:79.9663@ET(0.2315)PAAT(0.1921)EAPS(0.1921)S(0.1921)T(0.1921)PK;
ETPHSPGVEDAPIAK	ET[79.9663]PHSPGVEDAPIAK	R	V	326	340	15	2,3	2T(79.9663)	sp|Q9UHB6-2|LIMA1_HUMAN	Q9UHB6-2	LIMA1_HUMAN	LIMA1	Isoform Alpha of LIM domain and actin-binding protein 1		sp|Q9UHB6-3|LIMA1_HUMAN, sp|Q9UHB6-4|LIMA1_HUMAN, sp|Q9UHB6-5|LIMA1_HUMAN, sp|Q9UHB6|LIMA1_HUMAN	3	4.8140328E7	MS/MS	STY:79.9663@ET(0.5000)PHS(0.5000)PGVEDAPIAK;
ETQSPEQVK	ET[79.9663]QSPEQVK	K	S	491	499	9	2	2T(79.9663)	sp|Q9NYF8-2|BCLF1_HUMAN	Q9NYF8-2	BCLF1_HUMAN	BCLAF1	Isoform 2 of Bcl-2-associated transcription factor 1		sp|Q9NYF8-3|BCLF1_HUMAN, sp|Q9NYF8|BCLF1_HUMAN	1	1.9405366E7	MS/MS	STY:79.9663@ET(0.9281)QS(0.0719)PEQVK;
ETSVSKEDTDHEEK	ET[79.9663]SVSKEDTDHEEK	K	A	114	127	14	2,3	2T(79.9663)	sp|O75475-2|PSIP1_HUMAN	O75475-2	PSIP1_HUMAN	PSIP1	Isoform 2 of PC4 and SFRS1-interacting protein		sp|O75475-3|PSIP1_HUMAN, sp|O75475|PSIP1_HUMAN	2	1.466218E7	MS/MS	STY:79.9663@ET(0.3267)S(0.3267)VS(0.3267)KEDT(0.0199)DHEEK;
ETSVSKEDTDHEEKASNEDVTK	ET[79.9663]SVSKEDTDHEEKASNEDVT[79.9663]K	K	A	114	135	22	3	21T(79.9663),2T(79.9663)	sp|O75475-2|PSIP1_HUMAN	O75475-2	PSIP1_HUMAN	PSIP1	Isoform 2 of PC4 and SFRS1-interacting protein		sp|O75475-3|PSIP1_HUMAN, sp|O75475|PSIP1_HUMAN	1	4.1039692E7	MS/MS	STY:79.9663@ET(0.3250)S(0.3250)VS(0.3250)KEDT(0.3250)DHEEKAS(0.3250)NEDVT(0.3751)K;
ETSVSKEDTDHEEKASNEDVTK	ET[79.9663]S[79.9663]VSKEDTDHEEKASNEDVTK	K	A	114	135	22	3	2T(79.9663),3S(79.9663)	sp|O75475-2|PSIP1_HUMAN	O75475-2	PSIP1_HUMAN	PSIP1	Isoform 2 of PC4 and SFRS1-interacting protein		sp|O75475-3|PSIP1_HUMAN, sp|O75475|PSIP1_HUMAN	1	9536059	MS/MS	STY:79.9663@ET(0.3901)S(0.3901)VS(0.3901)KEDT(0.0497)DHEEKAS(0.3901)NEDVT(0.3901)K;
EVAATEEDVTRLPSPTSPFSSLSQDQAATSK	EVAATEEDVTRLPSPTSPFSS[79.9663]LSQDQAATSK	K	A	975	1005	31	3	21S(79.9663)	sp|Q8WWI1-2|LMO7_HUMAN	Q8WWI1-2	LMO7_HUMAN	LMO7	Isoform 2 of LIM domain only protein 7		sp|Q8WWI1-3|LMO7_HUMAN, sp|Q8WWI1-4|LMO7_HUMAN, sp|Q8WWI1-5|LMO7_HUMAN, sp|Q8WWI1|LMO7_HUMAN	1	0	MS/MS	STY:79.9663@EVAAT(0.0480)EEDVT(0.1050)RLPS(0.1050)PT(0.1050)S(0.1050)PFS(0.0115)S(0.1301)LS(0.1301)QDQAAT(0.1301)S(0.1301)K;
EVAATEEDVTRLPSPTSPFSSLSQDQAATSK	EVAATEEDVTRLPSPT[79.9663]S[79.9663]PFSSLSQDQAATSK	K	A	975	1005	31	3	16T(79.9663),17S(79.9663)	sp|Q8WWI1-2|LMO7_HUMAN	Q8WWI1-2	LMO7_HUMAN	LMO7	Isoform 2 of LIM domain only protein 7		sp|Q8WWI1-3|LMO7_HUMAN, sp|Q8WWI1-4|LMO7_HUMAN, sp|Q8WWI1-5|LMO7_HUMAN, sp|Q8WWI1|LMO7_HUMAN	3	3.1640744E7	MS/MS	STY:79.9663@EVAAT(0.0155)EEDVT(0.0162)RLPS(0.0396)PT(0.7938)S(0.8023)PFS(0.0329)S(0.0542)LS(0.0462)QDQAAT(0.0996)S(0.0996)K;
EVAATEEDVTRLPSPTSPFSSLSQDQAATSK	EVAAT[79.9663]EEDVTRLPSPTSPFSSLSQDQAATSK	K	A	975	1005	31	3	5T(79.9663)	sp|Q8WWI1-2|LMO7_HUMAN	Q8WWI1-2	LMO7_HUMAN	LMO7	Isoform 2 of LIM domain only protein 7		sp|Q8WWI1-3|LMO7_HUMAN, sp|Q8WWI1-4|LMO7_HUMAN, sp|Q8WWI1-5|LMO7_HUMAN, sp|Q8WWI1|LMO7_HUMAN	1	1.0361744E7	MS/MS	STY:79.9663@EVAAT(0.2257)EEDVT(0.2257)RLPS(0.2257)PT(0.2257)S(0.0103)PFS(0.0037)S(0.0037)LS(0.0033)QDQAAT(0.0381)S(0.0381)K;
EVAATEEDVTRLPSPTSPFSSLSQDQAATSK	EVAAT[79.9663]EEDVTRLPSPT[79.9663]SPFSSLSQDQAATSK	K	A	975	1005	31	3	16T(79.9663),5T(79.9663)	sp|Q8WWI1-2|LMO7_HUMAN	Q8WWI1-2	LMO7_HUMAN	LMO7	Isoform 2 of LIM domain only protein 7		sp|Q8WWI1-3|LMO7_HUMAN, sp|Q8WWI1-4|LMO7_HUMAN, sp|Q8WWI1-5|LMO7_HUMAN, sp|Q8WWI1|LMO7_HUMAN	1	0	MS/MS	STY:79.9663@EVAAT(0.5799)EEDVT(0.0367)RLPS(0.0367)PT(0.4324)S(0.4324)PFS(0.4324)S(0.0124)LS(0.0124)QDQAAT(0.0124)S(0.0124)K;
EVDDILGEGSDDSDSEK	EVDDILGEGSDDS[79.9663]DS[79.9663]EK	K	R	860	876	17	2	13S(79.9663),15S(79.9663)	sp|Q9Y5B0|CTDP1_HUMAN	Q9Y5B0	CTDP1_HUMAN	CTDP1	RNA polymerase II subunit A C-terminal domain phosphatase			1	0	MS/MS	STY:79.9663@EVDDILGEGS(0.3854)DDS(0.8073)DS(0.8073)EK;
EVDDILGEGSDDSDSEK	EVDDILGEGS[79.9663]DDS[79.9663]DSEK	K	R	860	876	17	2	10S(79.9663),13S(79.9663)	sp|Q9Y5B0|CTDP1_HUMAN	Q9Y5B0	CTDP1_HUMAN	CTDP1	RNA polymerase II subunit A C-terminal domain phosphatase			1	0	MS/MS	STY:79.9663@EVDDILGEGS(0.9221)DDS(0.9221)DS(0.1557)EK;
EVDGLLTSEPMGSPVSSK	EVDGLLTSEPMGSPVS[79.9663]SK	K	T	582	599	18	2	16S(79.9663)	sp|Q8WWM7-2|ATX2L_HUMAN	Q8WWM7-2	ATX2L_HUMAN	ATXN2L	Isoform 2 of Ataxin-2-like protein		sp|Q8WWM7-3|ATX2L_HUMAN, sp|Q8WWM7-4|ATX2L_HUMAN, sp|Q8WWM7-5|ATX2L_HUMAN, sp|Q8WWM7-6|ATX2L_HUMAN, sp|Q8WWM7-8|ATX2L_HUMAN, sp|Q8WWM7-9|ATX2L_HUMAN, sp|Q8WWM7|ATX2L_HUMAN	1	0	MS/MS	STY:79.9663@EVDGLLT(0.0124)S(0.0402)EPMGS(0.0402)PVS(0.4535)S(0.4535)K;
EVDGLLTSEPMGSPVSSK	EVDGLLTSEPM[15.9949]GSPVS[79.9663]SK	K	T	582	599	18	2	11M(15.9949),16S(79.9663)	sp|Q8WWM7-2|ATX2L_HUMAN	Q8WWM7-2	ATX2L_HUMAN	ATXN2L	Isoform 2 of Ataxin-2-like protein		sp|Q8WWM7-3|ATX2L_HUMAN, sp|Q8WWM7-4|ATX2L_HUMAN, sp|Q8WWM7-5|ATX2L_HUMAN, sp|Q8WWM7-6|ATX2L_HUMAN, sp|Q8WWM7-8|ATX2L_HUMAN, sp|Q8WWM7-9|ATX2L_HUMAN, sp|Q8WWM7|ATX2L_HUMAN	1	5442683	MS/MS	STY:79.9663@EVDGLLT(0.0167)S(0.0167)EPMGS(0.0167)PVS(0.4749)S(0.4749)K;M:15.9949@EVDGLLTSEPM(1.0000)GSPVSSK;
EVDPSTGELQSLQMPESEGPSSLDPSQEGPTGLK	EVDPSTGELQSLQMPESEGPSSLDPSQEGPT[79.9663]GLK	K	E	345	378	34	3	31T(79.9663)	sp|Q13501|SQSTM_HUMAN	Q13501	SQSTM_HUMAN	SQSTM1	Sequestosome-1		sp|Q13501-2|SQSTM_HUMAN	1	4.5630072E7	MS/MS	STY:79.9663@EVDPS(0.0274)T(0.0274)GELQS(0.0136)LQMPES(0.0789)EGPS(0.0634)S(0.0634)LDPS(0.1701)QEGPT(0.5557)GLK;
EVDPSTGELQSLQMPESEGPSSLDPSQEGPTGLK	EVDPSTGELQSLQMPESEGPSSLDPS[79.9663]QEGPTGLK	K	E	345	378	34	3	26S(79.9663)	sp|Q13501|SQSTM_HUMAN	Q13501	SQSTM_HUMAN	SQSTM1	Sequestosome-1		sp|Q13501-2|SQSTM_HUMAN	2	4.5630072E7	MS/MS	STY:79.9663@EVDPS(0.1479)T(0.0912)GELQS(0.0561)LQMPES(0.0489)EGPS(0.0081)S(0.0165)LDPS(0.6232)QEGPT(0.0082)GLK;
EVDPSTGELQSLQMPESEGPSSLDPSQEGPTGLK	EVDPSTGELQSLQMPESEGPS[79.9663]SLDPSQEGPTGLK	K	E	345	378	34	3	21S(79.9663)	sp|Q13501|SQSTM_HUMAN	Q13501	SQSTM_HUMAN	SQSTM1	Sequestosome-1		sp|Q13501-2|SQSTM_HUMAN	1	7.9433312E7	MS/MS	STY:79.9663@EVDPS(0.0107)T(0.0107)GELQS(0.0118)LQMPES(0.0108)EGPS(0.3146)S(0.3146)LDPS(0.0139)QEGPT(0.3131)GLK;
EVDPSTGELQSLQMPESEGPSSLDPSQEGPTGLK	EVDPSTGELQSLQMPESEGPS[79.9663]S[79.9663]LDPSQEGPTGLK	K	E	345	378	34	3	21S(79.9663),22S(79.9663)	sp|Q13501|SQSTM_HUMAN	Q13501	SQSTM_HUMAN	SQSTM1	Sequestosome-1		sp|Q13501-2|SQSTM_HUMAN	3	4.3653292E7	MS/MS	STY:79.9663@EVDPS(0.1978)T(0.1978)GELQS(0.2662)LQMPES(0.2662)EGPS(0.5189)S(0.5189)LDPS(0.0158)QEGPT(0.0185)GLK;
EVDPSTGELQSLQMPESEGPSSLDPSQEGPTGLK	EVDPSTGELQSLQMPES[79.9663]EGPSSLDPSQEGPTGLK	K	E	345	378	34	3,4	17S(79.9663)	sp|Q13501|SQSTM_HUMAN	Q13501	SQSTM_HUMAN	SQSTM1	Sequestosome-1		sp|Q13501-2|SQSTM_HUMAN	2	8.5897928E7	MS/MS	STY:79.9663@EVDPS(0.0389)T(0.0234)GELQS(0.0177)LQMPES(0.7061)EGPS(0.0963)S(0.0963)LDPS(0.0127)QEGPT(0.0085)GLK;
EVDPSTGELQSLQMPESEGPSSLDPSQEGPTGLK	EVDPSTGELQSLQM[15.9949]PESEGPS[79.9663]SLDPSQEGPTGLK	K	E	345	378	34	3	14M(15.9949),21S(79.9663)	sp|Q13501|SQSTM_HUMAN	Q13501	SQSTM_HUMAN	SQSTM1	Sequestosome-1		sp|Q13501-2|SQSTM_HUMAN	1	2.7065522E7	MS/MS	STY:79.9663@EVDPS(0.0521)T(0.0521)GELQS(0.0393)LQMPES(0.0438)EGPS(0.3824)S(0.3824)LDPS(0.0344)QEGPT(0.0134)GLK;M:15.9949@EVDPSTGELQSLQM(1.0000)PESEGPSSLDPSQEGPTGLK;
EVDPSTGELQSLQMPESEGPSSLDPSQEGPTGLK	EVDPSTGELQSLQM[15.9949]PES[79.9663]EGPSSLDPSQEGPTGLK	K	E	345	378	34	3	14M(15.9949),17S(79.9663)	sp|Q13501|SQSTM_HUMAN	Q13501	SQSTM_HUMAN	SQSTM1	Sequestosome-1		sp|Q13501-2|SQSTM_HUMAN	2	0	MS/MS	STY:79.9663@EVDPS(0.0067)T(0.0067)GELQS(0.0067)LQMPES(0.1960)EGPS(0.1960)S(0.1960)LDPS(0.1960)QEGPT(0.1960)GLK;M:15.9949@EVDPSTGELQSLQM(1.0000)PESEGPSSLDPSQEGPTGLK;
EVDPSTGELQSLQMPESEGPSSLDPSQEGPTGLK	EVDPSTGELQS[79.9663]LQMPESEGPSSLDPSQEGPTGLK	K	E	345	378	34	3	11S(79.9663)	sp|Q13501|SQSTM_HUMAN	Q13501	SQSTM_HUMAN	SQSTM1	Sequestosome-1		sp|Q13501-2|SQSTM_HUMAN	1	0	MS/MS	STY:79.9663@EVDPS(0.0152)T(0.0152)GELQS(0.2401)LQMPES(0.2401)EGPS(0.2401)S(0.2401)LDPS(0.0048)QEGPT(0.0045)GLK;
EVDPSTGELQSLQMPESEGPSSLDPSQEGPTGLK	EVDPS[79.9663]T[79.9663]GELQSLQMPESEGPSSLDPSQEGPTGLK	K	E	345	378	34	3	5S(79.9663),6T(79.9663)	sp|Q13501|SQSTM_HUMAN	Q13501	SQSTM_HUMAN	SQSTM1	Sequestosome-1		sp|Q13501-2|SQSTM_HUMAN	1	4.3653292E7	MS/MS	STY:79.9663@EVDPS(0.3918)T(0.3918)GELQS(0.0127)LQMPES(0.0215)EGPS(0.3918)S(0.3918)LDPS(0.0142)QEGPT(0.3843)GLK;
EVEDKESEGEEEDEDEDLSK	EVEDKESEGEEEDEDEDLS[79.9663]K	K	Y	147	166	20	2,3	19S(79.9663)	sp|O95218-2|ZRAB2_HUMAN	O95218-2	ZRAB2_HUMAN	ZRANB2	Isoform 2 of Zinc finger Ran-binding domain-containing protein 2		sp|O95218|ZRAB2_HUMAN	2	0	MS/MS	STY:79.9663@EVEDKES(0.4350)EGEEEDEDEDLS(0.5650)K;
EVEDKESEGEEEDEDEDLSK	EVEDKES[79.9663]EGEEEDEDEDLSK	K	Y	147	166	20	2,3	7S(79.9663)	sp|O95218-2|ZRAB2_HUMAN	O95218-2	ZRAB2_HUMAN	ZRANB2	Isoform 2 of Zinc finger Ran-binding domain-containing protein 2		sp|O95218|ZRAB2_HUMAN	9	1.81300432E8	MS/MS	STY:79.9663@EVEDKES(0.9367)EGEEEDEDEDLS(0.0633)K;
EVEEDSEDEEMSEDEEDDSSGEEVVIPQK	EVEEDSEDEEMSEDEEDDS[79.9663]S[79.9663]GEEVVIPQK	K	K	23	51	29	3	19S(79.9663),20S(79.9663)	sp|P19338|NUCL_HUMAN	P19338	NUCL_HUMAN	NCL	Nucleolin			1	0	MS/MS	STY:79.9663@EVEEDS(0.4516)EDEEMS(0.1311)EDEEDDS(0.7086)S(0.7086)GEEVVIPQK;
EVEEDSEDEEMSEDEEDDSSGEEVVIPQKK	EVEEDSEDEEMSEDEEDDS[79.9663]S[79.9663]GEEVVIPQKK	K	G	23	52	30	3	19S(79.9663),20S(79.9663)	sp|P19338|NUCL_HUMAN	P19338	NUCL_HUMAN	NCL	Nucleolin			2	1.3918466E7	MS/MS	STY:79.9663@EVEEDS(0.0758)EDEEMS(0.0758)EDEEDDS(0.9242)S(0.9242)GEEVVIPQKK;
EVEEDSEDEEMSEDEEDDSSGEEVVIPQK	EVEEDSEDEEMS[79.9663]EDEEDDS[79.9663]S[79.9663]GEEVVIPQK	K	K	23	51	29	3	12S(79.9663),19S(79.9663),20S(79.9663)	sp|P19338|NUCL_HUMAN	P19338	NUCL_HUMAN	NCL	Nucleolin			1	0	MS/MS	STY:79.9663@EVEEDS(0.7258)EDEEMS(0.7581)EDEEDDS(0.7581)S(0.7581)GEEVVIPQK;
EVEEDSEDEEMSEDEEDDSSGEEVVIPQKK	EVEEDSEDEEMS[79.9663]EDEEDDS[79.9663]S[79.9663]GEEVVIPQKK	K	G	23	52	30	3	12S(79.9663),19S(79.9663),20S(79.9663)	sp|P19338|NUCL_HUMAN	P19338	NUCL_HUMAN	NCL	Nucleolin			6	2.1888272E8	MS/MS	STY:79.9663@EVEEDS(0.3469)EDEEMS(0.8838)EDEEDDS(0.8847)S(0.8847)GEEVVIPQKK;
EVEEDSEDEEMSEDEEDDSSGEEVVIPQK	EVEEDS[79.9663]EDEEMSEDEEDDS[79.9663]S[79.9663]GEEVVIPQK	K	K	23	51	29	3	19S(79.9663),20S(79.9663),6S(79.9663)	sp|P19338|NUCL_HUMAN	P19338	NUCL_HUMAN	NCL	Nucleolin			3	1.7866728E8	MS/MS	STY:79.9663@EVEEDS(0.8412)EDEEMS(0.4791)EDEEDDS(0.8399)S(0.8399)GEEVVIPQK;
EVEEDSEDEEMSEDEEDDSSGEEVVIPQKK	EVEEDS[79.9663]EDEEMSEDEEDDS[79.9663]S[79.9663]GEEVVIPQKK	K	G	23	52	30	3	19S(79.9663),20S(79.9663),6S(79.9663)	sp|P19338|NUCL_HUMAN	P19338	NUCL_HUMAN	NCL	Nucleolin			2	8.1108968E7	MS/MS	STY:79.9663@EVEEDS(0.7623)EDEEMS(0.7366)EDEEDDS(0.7506)S(0.7506)GEEVVIPQKK;
EVEEDSEDEEMSEDEEDDSSGEEVVIPQK	EVEEDS[79.9663]EDEEMS[79.9663]EDEEDDSSGEEVVIPQK	K	K	23	51	29	3	12S(79.9663),6S(79.9663)	sp|P19338|NUCL_HUMAN	P19338	NUCL_HUMAN	NCL	Nucleolin			1	1.806882E7	MS/MS	STY:79.9663@EVEEDS(0.7982)EDEEMS(0.7972)EDEEDDS(0.2023)S(0.2023)GEEVVIPQK;
EVEEDSEDEEMSEDEEDDSSGEEVVIPQKK	EVEEDS[79.9663]EDEEMS[79.9663]EDEEDDSSGEEVVIPQKK	K	G	23	52	30	3	12S(79.9663),6S(79.9663)	sp|P19338|NUCL_HUMAN	P19338	NUCL_HUMAN	NCL	Nucleolin			2	6.89816e+06	MS/MS	STY:79.9663@EVEEDS(0.5000)EDEEMS(0.5000)EDEEDDS(0.5000)S(0.5000)GEEVVIPQKK;
EVEEDSEDEEMSEDEEDDSSGEEVVIPQK	EVEEDS[79.9663]EDEEMS[79.9663]EDEEDDSS[79.9663]GEEVVIPQK	K	K	23	51	29	3	12S(79.9663),20S(79.9663),6S(79.9663)	sp|P19338|NUCL_HUMAN	P19338	NUCL_HUMAN	NCL	Nucleolin			2	0	MS/MS	STY:79.9663@EVEEDS(0.7590)EDEEMS(0.7400)EDEEDDS(0.7400)S(0.7609)GEEVVIPQK;
EVEEDSEDEEMSEDEEDDSSGEEVVIPQK	EVEEDS[79.9663]EDEEMS[79.9663]EDEEDDS[79.9663]SGEEVVIPQK	K	K	23	51	29	3	12S(79.9663),19S(79.9663),6S(79.9663)	sp|P19338|NUCL_HUMAN	P19338	NUCL_HUMAN	NCL	Nucleolin			8	2.19613728E8	MS/MS	STY:79.9663@EVEEDS(0.9380)EDEEMS(0.9375)EDEEDDS(0.9393)S(0.1851)GEEVVIPQK;
EVEEDSEDEEMSEDEEDDSSGEEVVIPQKK	EVEEDS[79.9663]EDEEMS[79.9663]EDEEDDS[79.9663]SGEEVVIPQKK	K	G	23	52	30	3,4	12S(79.9663),19S(79.9663),6S(79.9663)	sp|P19338|NUCL_HUMAN	P19338	NUCL_HUMAN	NCL	Nucleolin			18	2.2197072E8	MS/MS	STY:79.9663@EVEEDS(0.8811)EDEEMS(0.8811)EDEEDDS(0.8811)S(0.3568)GEEVVIPQKK;
EVEEDSEDEEMSEDEEDDSSGEEVVIPQKK	EVEEDS[79.9663]EDEEM[15.9949]S[79.9663]EDEEDDSSGEEVVIPQKK	K	G	23	52	30	3	11M(15.9949),12S(79.9663),6S(79.9663)	sp|P19338|NUCL_HUMAN	P19338	NUCL_HUMAN	NCL	Nucleolin			1	0	MS/MS	STY:79.9663@EVEEDS(0.5000)EDEEMS(0.5000)EDEEDDS(0.5000)S(0.5000)GEEVVIPQKK;M:15.9949@EVEEDSEDEEM(1.0000)SEDEEDDSSGEEVVIPQKK;
EVHDELEDLPSPPPPLSPPPTTSPHK	EVHDELEDLPSPPPPLSPPPT[79.9663]T[79.9663]SPHK	K	Q	178	203	26	3	21T(79.9663),22T(79.9663)	sp|Q9NQX3-2|GEPH_HUMAN	Q9NQX3-2	GEPH_HUMAN	GPHN	Isoform 2 of Gephyrin		sp|Q9NQX3|GEPH_HUMAN	1	9999492	MS/MS	STY:79.9663@EVHDELEDLPS(0.2613)PPPPLS(0.2613)PPPT(0.4925)T(0.4925)S(0.4925)PHK;
EVHDELEDLPSPPPPLSPPPTTSPHK	EVHDELEDLPSPPPPLS[79.9663]PPPTT[79.9663]S[79.9663]PHK	K	Q	178	203	26	3	17S(79.9663),22T(79.9663),23S(79.9663)	sp|Q9NQX3-2|GEPH_HUMAN	Q9NQX3-2	GEPH_HUMAN	GPHN	Isoform 2 of Gephyrin		sp|Q9NQX3|GEPH_HUMAN	1	2.5930092E7	MS/MS	STY:79.9663@EVHDELEDLPS(0.0990)PPPPLS(0.8204)PPPT(0.4306)T(0.8250)S(0.8250)PHK;
EVHDELEDLPSPPPPLSPPPTTSPHK	EVHDELEDLPS[79.9663]PPPPLS[79.9663]PPPT[79.9663]TSPHK	K	Q	178	203	26	3	11S(79.9663),17S(79.9663),21T(79.9663)	sp|Q9NQX3-2|GEPH_HUMAN	Q9NQX3-2	GEPH_HUMAN	GPHN	Isoform 2 of Gephyrin		sp|Q9NQX3|GEPH_HUMAN	5	2.6495052E7	MS/MS	STY:79.9663@EVHDELEDLPS(0.6967)PPPPLS(0.6939)PPPT(0.6939)T(0.4578)S(0.4578)PHK;
EVPSKEEPSPVK	EVPSKEEPS[79.9663]PVK	K	A	606	617	12	2	9S(79.9663)	sp|P46821|MAP1B_HUMAN	P46821	MAP1B_HUMAN	MAP1B	Microtubule-associated protein 1B			1	0	MS/MS	STY:79.9663@EVPS(0.0742)KEEPS(0.9258)PVK;
EVQAEQPSSSSPR	EVQAEQPS[79.9663]SSSPR	R	R	178	190	13	2	8S(79.9663)	sp|Q9Y388|RBMX2_HUMAN	Q9Y388	RBMX2_HUMAN	RBMX2	RNA-binding motif protein, X-linked 2			2	0	MS/MS	STY:79.9663@EVQAEQPS(0.2500)S(0.2500)S(0.2500)S(0.2500)PR;
EVSSRPSTPGLSVVSGISATSEDIPNK	EVSSRPS[79.9663]T[79.9663]PGLSVVSGISATSEDIPNK	R	I	755	781	27	3	7S(79.9663),8T(79.9663)	sp|Q14C86-2|GAPD1_HUMAN	Q14C86-2	GAPD1_HUMAN	GAPVD1	Isoform 2 of GTPase-activating protein and VPS9 domain-containing protein 1		sp|Q14C86-3|GAPD1_HUMAN, sp|Q14C86-4|GAPD1_HUMAN, sp|Q14C86-5|GAPD1_HUMAN, sp|Q14C86-6|GAPD1_HUMAN, sp|Q14C86|GAPD1_HUMAN	1	0	MS/MS	STY:79.9663@EVS(0.3910)S(0.3910)RPS(0.4188)T(0.4188)PGLS(0.1098)VVS(0.0859)GIS(0.0514)AT(0.0667)S(0.0667)EDIPNK;
EVSDDEAEEK	EVS[79.9663]DDEAEEK	K	E	351	360	10	2	3S(79.9663)	sp|P07900-2|HS90A_HUMAN	P07900-2	HS90A_HUMAN	HSP90AA1	Isoform 2 of Heat shock protein HSP 90-alpha		sp|P07900|HS90A_HUMAN	12	7.5573088E8	MS/MS	STY:79.9663@EVS(1.0000)DDEAEEK;
EVSDDEAEEKEDKEEEK	EVS[79.9663]DDEAEEKEDKEEEK	K	E	351	367	17	2,3	3S(79.9663)	sp|P07900-2|HS90A_HUMAN	P07900-2	HS90A_HUMAN	HSP90AA1	Isoform 2 of Heat shock protein HSP 90-alpha		sp|P07900|HS90A_HUMAN	9	4.1294048E8	MS/MS	STY:79.9663@EVS(1.0000)DDEAEEKEDKEEEK;
EVSPSDVR	EVS[79.9663]PSDVR	R	E	1977	1984	8	2	3S(79.9663)	sp|Q8WYP5-2|ELYS_HUMAN	Q8WYP5-2	ELYS_HUMAN	AHCTF1	Isoform 2 of Protein ELYS		sp|Q8WYP5-3|ELYS_HUMAN, sp|Q8WYP5|ELYS_HUMAN	1	782899	MS/MS	STY:79.9663@EVS(0.9039)PS(0.0961)DVR;
EVVKPVPITSPAVSK	EVVKPVPIT[79.9663]SPAVSK	K	V	102	116	15	2	9T(79.9663)	sp|Q96HC4|PDLI5_HUMAN	Q96HC4	PDLI5_HUMAN	PDLIM5	PDZ and LIM domain protein 5			1	0	MS/MS	STY:79.9663@EVVKPVPIT(0.3333)S(0.3333)PAVS(0.3333)K;
EVYELLDSPGK	EVYELLDS[79.9663]PGK	K	V	20	30	11	2	8S(79.9663)	sp|P22234-2|PUR6_HUMAN	P22234-2	PUR6_HUMAN	PAICS	Isoform 2 of Bifunctional phosphoribosylaminoimidazole carboxylase/phosphoribosylaminoimidazole succinocarboxamide synthetase		sp|P22234|PUR6_HUMAN	2	0	MS/MS	STY:79.9663@EVY(0.0649)ELLDS(0.9351)PGK;
EWNGVVSESDSPVK	EWNGVVSES[79.9663]DSPVK	K	R	41	54	14	2	9S(79.9663)	sp|P18858-2|DNLI1_HUMAN	P18858-2	DNLI1_HUMAN	LIG1	Isoform 2 of DNA ligase 1		sp|P18858-3|DNLI1_HUMAN, sp|P18858|DNLI1_HUMAN	1	0	MS/MS	STY:79.9663@EWNGVVS(0.0349)ES(0.9014)DS(0.0636)PVK;
EYFDDSTEER	EYFDDS[79.9663]TEER	K	F	259	268	10	2	6S(79.9663)	sp|Q8NEF9|SRFB1_HUMAN	Q8NEF9	SRFB1_HUMAN	SRFBP1	Serum response factor-binding protein 1			1	0	MS/MS	STY:79.9663@EY(0.0216)FDDS(0.4892)T(0.4892)EER;
EYIPGQPPLSQSSDSSPTRNSEPAGLETPEAK	EYIPGQPPLSQSSDSSPTRNSEPAGLET[79.9663]PEAK	K	V	871	902	32	3	28T(79.9663)	sp|P07814|SYEP_HUMAN	P07814	SYEP_HUMAN	EPRS1	Bifunctional glutamate/proline--tRNA ligase			3	8.2352944E7	MS/MS	STY:79.9663@EY(0.0111)IPGQPPLS(0.0124)QS(0.0124)S(0.0124)DS(0.0124)S(0.0124)PT(0.0124)RNS(0.0136)EPAGLET(0.9009)PEAK;
EYIPGQPPLSQSSDSSPTRNSEPAGLETPEAK	EYIPGQPPLSQSSDSSPT[79.9663]RNSEPAGLETPEAK	K	V	871	902	32	3	18T(79.9663)	sp|P07814|SYEP_HUMAN	P07814	SYEP_HUMAN	EPRS1	Bifunctional glutamate/proline--tRNA ligase			1	2.8475228E7	MS/MS	STY:79.9663@EY(0.0353)IPGQPPLS(0.0058)QS(0.0058)S(0.0058)DS(0.0061)S(0.0061)PT(0.3117)RNS(0.3117)EPAGLET(0.3117)PEAK;
EYIPGQPPLSQSSDSSPTR	EYIPGQPPLSQSSDSS[79.9663]PT[79.9663]R	K	N	871	889	19	2	16S(79.9663),18T(79.9663)	sp|P07814|SYEP_HUMAN	P07814	SYEP_HUMAN	EPRS1	Bifunctional glutamate/proline--tRNA ligase			1	2.0042956E7	MS/MS	STY:79.9663@EY(0.0802)IPGQPPLS(0.1328)QS(0.1328)S(0.1328)DS(0.1328)S(0.6943)PT(0.6943)R;
EYIPGQPPLSQSSDSSPTRNSEPAGLETPEAK	EYIPGQPPLSQSSDS[79.9663]SPTRNS[79.9663]EPAGLETPEAK	K	V	871	902	32	3	15S(79.9663),21S(79.9663)	sp|P07814|SYEP_HUMAN	P07814	SYEP_HUMAN	EPRS1	Bifunctional glutamate/proline--tRNA ligase			1	3.6983264E7	MS/MS	STY:79.9663@EY(0.0945)IPGQPPLS(0.0158)QS(0.0170)S(0.0170)DS(0.4196)S(0.4196)PT(0.4196)RNS(0.5448)EPAGLET(0.0521)PEAK;
EYIPGQPPLSQSSDSSPTRNSEPAGLETPEAK	EYIPGQPPLSQSSDS[79.9663]S[79.9663]PTRNSEPAGLETPEAK	K	V	871	902	32	3	15S(79.9663),16S(79.9663)	sp|P07814|SYEP_HUMAN	P07814	SYEP_HUMAN	EPRS1	Bifunctional glutamate/proline--tRNA ligase			1	2.0620444E7	MS/MS	STY:79.9663@EY(0.0152)IPGQPPLS(0.0182)QS(0.0182)S(0.0182)DS(0.4570)S(0.4570)PT(0.4570)RNS(0.4570)EPAGLET(0.1020)PEAK;
EYIPGQPPLSQSSDSSPTR	EYIPGQPPLSQS[79.9663]SDSSPTR	K	N	871	889	19	2	12S(79.9663)	sp|P07814|SYEP_HUMAN	P07814	SYEP_HUMAN	EPRS1	Bifunctional glutamate/proline--tRNA ligase			3	7.9308176E7	MS/MS	STY:79.9663@EY(0.0207)IPGQPPLS(0.2590)QS(0.2711)S(0.2711)DS(0.0594)S(0.0594)PT(0.0594)R;
EYIPGQPPLSQSSDSSPTR	EYIPGQPPLSQS[79.9663]S[79.9663]DSSPTR	K	N	871	889	19	3	12S(79.9663),13S(79.9663)	sp|P07814|SYEP_HUMAN	P07814	SYEP_HUMAN	EPRS1	Bifunctional glutamate/proline--tRNA ligase			2	5.91343e+06	MS/MS	STY:79.9663@EY(0.1202)IPGQPPLS(0.0552)QS(0.4342)S(0.4342)DS(0.4342)S(0.4342)PT(0.0877)R;
EYIPGQPPLSQSSDSSPTR	EYIPGQPPLS[79.9663]QSSDSSPTR	K	N	871	889	19	2	10S(79.9663)	sp|P07814|SYEP_HUMAN	P07814	SYEP_HUMAN	EPRS1	Bifunctional glutamate/proline--tRNA ligase			3	7.9308176E7	MS/MS	STY:79.9663@EY(0.0416)IPGQPPLS(0.6461)QS(0.0224)S(0.0224)DS(0.0224)S(0.1225)PT(0.1225)R;
EYIPGQPPLSQSSDSSPTRNSEPAGLETPEAK	EYIPGQPPLS[79.9663]QSSDSSPTRNSEPAGLETPEAK	K	V	871	902	32	3	10S(79.9663)	sp|P07814|SYEP_HUMAN	P07814	SYEP_HUMAN	EPRS1	Bifunctional glutamate/proline--tRNA ligase			3	8.2352944E7	MS/MS	STY:79.9663@EY(0.0041)IPGQPPLS(0.2396)QS(0.2396)S(0.0059)DS(0.2396)S(0.2396)PT(0.0043)RNS(0.0043)EPAGLET(0.0230)PEAK;
EYIPGQPPLSQSSDSSPTRNSEPAGLETPEAK	EYIPGQPPLS[79.9663]QSSDSSPTRNSEPAGLET[79.9663]PEAK	K	V	871	902	32	3	10S(79.9663),28T(79.9663)	sp|P07814|SYEP_HUMAN	P07814	SYEP_HUMAN	EPRS1	Bifunctional glutamate/proline--tRNA ligase			1	3.6983264E7	MS/MS	STY:79.9663@EY(0.4464)IPGQPPLS(0.6215)QS(0.0471)S(0.0471)DS(0.0471)S(0.0252)PT(0.0252)RNS(0.0205)EPAGLET(0.7201)PEAK;
EYIPGQPPLSQSSDSSPTRNSEPAGLETPEAK	EYIPGQPPLS[79.9663]QS[79.9663]SDSSPTRNSEPAGLETPEAK	K	V	871	902	32	3	10S(79.9663),12S(79.9663)	sp|P07814|SYEP_HUMAN	P07814	SYEP_HUMAN	EPRS1	Bifunctional glutamate/proline--tRNA ligase			1	2.0620444E7	MS/MS	STY:79.9663@EY(0.0139)IPGQPPLS(0.2805)QS(0.2805)S(0.2805)DS(0.2805)S(0.2805)PT(0.2805)RNS(0.2805)EPAGLET(0.0228)PEAK;
EYVSNDAAQSDDEEK	EYVSNDAAQS[79.9663]DDEEK	K	L	394	408	15	2	10S(79.9663)	sp|Q5JSH3-2|WDR44_HUMAN	Q5JSH3-2	WDR44_HUMAN	WDR44	Isoform 2 of WD repeat-containing protein 44		sp|Q5JSH3-4|WDR44_HUMAN, sp|Q5JSH3|WDR44_HUMAN	2	7.23118e+06	MS/MS	STY:79.9663@EY(0.0325)VS(0.0325)NDAAQS(0.9350)DDEEK;
EYFDDSTEER	EY[79.9663]FDDSTEER	K	F	259	268	10	2	2Y(79.9663)	sp|Q8NEF9|SRFB1_HUMAN	Q8NEF9	SRFB1_HUMAN	SRFBP1	Serum response factor-binding protein 1			1	0	MS/MS	STY:79.9663@EY(0.5350)FDDS(0.2325)T(0.2325)EER;
EYIPGQPPLSQSSDSSPTR	EY[79.9663]IPGQPPLSQSSDSSPTR	K	N	871	889	19	2	2Y(79.9663)	sp|P07814|SYEP_HUMAN	P07814	SYEP_HUMAN	EPRS1	Bifunctional glutamate/proline--tRNA ligase			1	0	MS/MS	STY:79.9663@EY(0.1429)IPGQPPLS(0.1429)QS(0.1429)S(0.1429)DS(0.1429)S(0.1429)PT(0.1429)R;
EYIPGQPPLSQSSDSSPTRNSEPAGLETPEAK	EY[79.9663]IPGQPPLSQSSDSSPTRNSEPAGLET[79.9663]PEAK	K	V	871	902	32	3	28T(79.9663),2Y(79.9663)	sp|P07814|SYEP_HUMAN	P07814	SYEP_HUMAN	EPRS1	Bifunctional glutamate/proline--tRNA ligase			2	3.6983264E7	MS/MS	STY:79.9663@EY(0.3140)IPGQPPLS(0.3140)QS(0.3140)S(0.3140)DS(0.0869)S(0.0869)PT(0.0869)RNS(0.0869)EPAGLET(0.3964)PEAK;
EYIPGQPPLSQSSDSSPTRNSEPAGLETPEAK	EY[79.9663]IPGQPPLSQSSDSS[79.9663]PTRNSEPAGLETPEAK	K	V	871	902	32	4	16S(79.9663),2Y(79.9663)	sp|P07814|SYEP_HUMAN	P07814	SYEP_HUMAN	EPRS1	Bifunctional glutamate/proline--tRNA ligase			1	0	MS/MS	STY:79.9663@EY(0.4700)IPGQPPLS(0.0396)QS(0.0396)S(0.0753)DS(0.3997)S(0.5590)PT(0.0693)RNS(0.0693)EPAGLET(0.2783)PEAK;
FASDDEHDEHDENGATGPVK	FASDDEHDEHDENGAT[79.9663]GPVK	K	R	364	383	20	3	16T(79.9663)	sp|P05455|LA_HUMAN	P05455	LA_HUMAN	SSB	Lupus La protein			3	1.82309504E8	MS/MS	STY:79.9663@FAS(0.3156)DDEHDEHDENGAT(0.6844)GPVK;
FASDDEHDEHDENGATGPVK	FAS[79.9663]DDEHDEHDENGATGPVK	K	R	364	383	20	2,3	3S(79.9663)	sp|P05455|LA_HUMAN	P05455	LA_HUMAN	SSB	Lupus La protein			8	1.90874256E8	MS/MS	STY:79.9663@FAS(0.9392)DDEHDEHDENGAT(0.0608)GPVK;
FDIYDPFHPTDEAYSPPPAPEQK	FDIY[79.9663]DPFHPTDEAYSPPPAPEQK	R	Y	225	247	23	3	4Y(79.9663)	sp|Q9H7N4|SFR19_HUMAN	Q9H7N4	SFR19_HUMAN	SCAF1	Splicing factor, arginine/serine-rich 19			1	0	MS/MS	STY:79.9663@FDIY(0.5493)DPFHPT(0.0794)DEAY(0.2486)S(0.1227)PPPAPEQK;
FDSSLLSSDDETK	FDS[79.9663]S[79.9663]LLSSDDETK	K	C	556	568	13	2	3S(79.9663),4S(79.9663)	sp|P28715|ERCC5_HUMAN	P28715	ERCC5_HUMAN	ERCC5	DNA excision repair protein ERCC-5			1	0	MS/MS	STY:79.9663@FDS(0.8756)S(0.8756)LLS(0.0829)S(0.0829)DDET(0.0829)K;
FEDEGAGFEESSETGDYEEK	FEDEGAGFEESSETGDY[79.9663]EEK	K	A	926	945	20	2	17Y(79.9663)	sp|P46821|MAP1B_HUMAN	P46821	MAP1B_HUMAN	MAP1B	Microtubule-associated protein 1B			1	8.1767872E7	MS/MS	STY:79.9663@FEDEGAGFEES(0.0268)S(0.0268)ET(0.0268)GDY(0.9197)EEK;
FEDEGAGFEESSETGDYEEK	FEDEGAGFEES[79.9663]SETGDYEEK	K	A	926	945	20	2,3	11S(79.9663)	sp|P46821|MAP1B_HUMAN	P46821	MAP1B_HUMAN	MAP1B	Microtubule-associated protein 1B			3	8.1767872E7	MS/MS	STY:79.9663@FEDEGAGFEES(0.3292)S(0.3292)ET(0.3292)GDY(0.0124)EEK;
FEDEGAGFEESSETGDYEEK	FEDEGAGFEES[79.9663]S[79.9663]ETGDYEEK	K	A	926	945	20	2	11S(79.9663),12S(79.9663)	sp|P46821|MAP1B_HUMAN	P46821	MAP1B_HUMAN	MAP1B	Microtubule-associated protein 1B			1	0	MS/MS	STY:79.9663@FEDEGAGFEES(0.5000)S(0.5000)ET(0.5000)GDY(0.5000)EEK;
FEEESKEPVADEEEEDSDDDVEPITEFR	FEEESKEPVADEEEEDS[79.9663]DDDVEPITEFR	K	F	86	113	28	3	17S(79.9663)	sp|P54105|ICLN_HUMAN	P54105	ICLN_HUMAN	CLNS1A	Methylosome subunit pICln			11	4.47181376E8	MS/MS	STY:79.9663@FEEES(0.0329)KEPVADEEEEDS(0.9161)DDDVEPIT(0.0509)EFR;
FEEESKEPVADEEEEDSDDDVEPITEFR	FEEES[79.9663]KEPVADEEEEDSDDDVEPITEFR	K	F	86	113	28	3	5S(79.9663)	sp|P54105|ICLN_HUMAN	P54105	ICLN_HUMAN	CLNS1A	Methylosome subunit pICln			4	1.47069056E8	MS/MS	STY:79.9663@FEEES(0.9186)KEPVADEEEEDS(0.0379)DDDVEPIT(0.0434)EFR;
FEPESPGFESR	FEPES[79.9663]PGFESR	R	S	79	89	11	2	5S(79.9663)	sp|Q9H5H4|ZN768_HUMAN	Q9H5H4	ZN768_HUMAN	ZNF768	Zinc finger protein 768			1	2.0859e+06	MS/MS	STY:79.9663@FEPES(0.9406)PGFES(0.0594)R;
FGESEEVEMEVESDEEDDKQEK	FGESEEVEMEVES[79.9663]DEEDDKQEK	K	A	252	273	22	3	13S(79.9663)	sp|Q15459-2|SF3A1_HUMAN	Q15459-2	SF3A1_HUMAN	SF3A1	Isoform 2 of Splicing factor 3A subunit 1		sp|Q15459|SF3A1_HUMAN	5	5.5844504E7	MS/MS	STY:79.9663@FGES(0.0654)EEVEMEVES(0.9346)DEEDDKQEK;
FGESEEVEMEVESDEEDDKQEK	FGESEEVEM[15.9949]EVES[79.9663]DEEDDKQEK	K	A	252	273	22	3	13S(79.9663),9M(15.9949)	sp|Q15459-2|SF3A1_HUMAN	Q15459-2	SF3A1_HUMAN	SF3A1	Isoform 2 of Splicing factor 3A subunit 1		sp|Q15459|SF3A1_HUMAN	3	5.2039988E7	MS/MS	STY:79.9663@FGES(0.0709)EEVEMEVES(0.9291)DEEDDKQEK;M:15.9949@FGESEEVEM(1.0000)EVESDEEDDKQEK;
FGESEEVEMEVESDEEDDKQEK	FGES[79.9663]EEVEM[15.9949]EVESDEEDDKQEK	K	A	252	273	22	3	4S(79.9663),9M(15.9949)	sp|Q15459-2|SF3A1_HUMAN	Q15459-2	SF3A1_HUMAN	SF3A1	Isoform 2 of Splicing factor 3A subunit 1		sp|Q15459|SF3A1_HUMAN	1	5.2039988E7	MS/MS	STY:79.9663@FGES(0.5704)EEVEMEVES(0.4296)DEEDDKQEK;M:15.9949@FGESEEVEM(1.0000)EVESDEEDDKQEK;
FGIHVYQFPECDSDEDEDFK	FGIHVYQFPEC[57.0215]DS[79.9663]DEDEDFK	K	Q	222	241	20	3	11C(57.0215),13S(79.9663)	sp|Q99719-2|SEPT5_HUMAN	Q99719-2	SEPT5_HUMAN	SEPTIN5	Isoform 2 of Septin-5		sp|Q99719|SEPT5_HUMAN	2	4.3141e+06	MS/MS	STY:79.9663@FGIHVY(0.0842)QFPECDS(0.9158)DEDEDFK;
FGIHVYQFPECDSDEDEDFK	FGIHVY[79.9663]QFPEC[57.0215]DSDEDEDFK	K	Q	222	241	20	3	11C(57.0215),6Y(79.9663)	sp|Q99719-2|SEPT5_HUMAN	Q99719-2	SEPT5_HUMAN	SEPTIN5	Isoform 2 of Septin-5		sp|Q99719|SEPT5_HUMAN	1	0	MS/MS	STY:79.9663@FGIHVY(0.5000)QFPECDS(0.5000)DEDEDFK;
FGQAATMEGIGAIGGTPPAFNR	FGQAAT[79.9663]MEGIGAIGGTPPAFNR	R	A	346	367	22	3	6T(79.9663)	sp|Q15233-2|NONO_HUMAN	Q15233-2	NONO_HUMAN	NONO	Isoform 2 of Non-POU domain-containing octamer-binding protein		sp|Q15233|NONO_HUMAN	1	0	MS/MS	STY:79.9663@FGQAAT(0.5076)MEGIGAIGGT(0.4924)PPAFNR;
FHSPSTTWSPNK	FHSPS[79.9663]TTWSPNK	R	D	479	490	12	2	5S(79.9663)	sp|Q99590-2|SCAFB_HUMAN	Q99590-2	SCAFB_HUMAN	SCAF11	Isoform 2 of Protein SCAF11		sp|Q99590|SCAFB_HUMAN	1	0	MS/MS	STY:79.9663@FHS(0.0162)PS(0.2459)T(0.2459)T(0.2459)WS(0.2459)PNK;
FHSPSTTWSPNK	FHS[79.9663]PSTTWSPNK	R	D	479	490	12	2	3S(79.9663)	sp|Q99590-2|SCAFB_HUMAN	Q99590-2	SCAFB_HUMAN	SCAF11	Isoform 2 of Protein SCAF11		sp|Q99590|SCAFB_HUMAN	1	3656902	MS/MS	STY:79.9663@FHS(0.9347)PS(0.0163)T(0.0163)T(0.0163)WS(0.0163)PNK;
FIQELSGSSPK	FIQELS[79.9663]GSSPK	R	R	116	126	11	2	6S(79.9663)	sp|Q01664|TFAP4_HUMAN	Q01664	TFAP4_HUMAN	TFAP4	Transcription factor AP-4			1	2.33816e+06	MS/MS	STY:79.9663@FIQELS(0.3333)GS(0.3333)S(0.3333)PK;
FLESAAADFSDEDEDDDVDGREK	FLES[79.9663]AAADFSDEDEDDDVDGREK	K	S	224	246	23	3	4S(79.9663)	sp|O43815-2|STRN_HUMAN	O43815-2	STRN_HUMAN	STRN	Isoform 2 of Striatin		sp|O43815|STRN_HUMAN	1	3.09818e+06	MS/MS	STY:79.9663@FLES(0.5000)AAADFS(0.5000)DEDEDDDVDGREK;
FLETDSEEEQEEVNEK	FLET[79.9663]DS[79.9663]EEEQEEVNEK	R	K	817	832	16	2	4T(79.9663),6S(79.9663)	sp|Q76FK4-2|NOL8_HUMAN	Q76FK4-2	NOL8_HUMAN	NOL8	Isoform 2 of Nucleolar protein 8		sp|Q76FK4-4|NOL8_HUMAN, sp|Q76FK4|NOL8_HUMAN	3	1.5546304E7	MS/MS	STY:79.9663@FLET(1.0000)DS(1.0000)EEEQEEVNEK;
FLMECRNSPVTK	FLMEC[57.0215]RNS[79.9663]PVTK	K	T	58	69	12	2	5C(57.0215),8S(79.9663)	sp|Q13541|4EBP1_HUMAN	Q13541	4EBP1_HUMAN	EIF4EBP1	Eukaryotic translation initiation factor 4E-binding protein 1			6	3.2594464E7	MS/MS	STY:79.9663@FLMECRNS(0.9174)PVT(0.0826)K;
FMEQSRSPSVSPSK	FMEQS[79.9663]RS[79.9663]PSVSPSK	K	Q	458	471	14	2	5S(79.9663),7S(79.9663)	sp|Q96JG6-3|VPS50_HUMAN	Q96JG6-3	VPS50_HUMAN	VPS50	Isoform 3 of Syndetin		sp|Q96JG6|VPS50_HUMAN	2	0	MS/MS	STY:79.9663@FMEQS(0.4934)RS(0.4934)PS(0.4934)VS(0.4934)PS(0.0262)K;
FNDSEGDDTEETEDYR	FNDSEGDDTEETEDY[79.9663]R	K	Q	392	407	16	2	15Y(79.9663)	sp|Q9NYF8-2|BCLF1_HUMAN	Q9NYF8-2	BCLF1_HUMAN	BCLAF1	Isoform 2 of Bcl-2-associated transcription factor 1		sp|Q9NYF8-3|BCLF1_HUMAN, sp|Q9NYF8|BCLF1_HUMAN	1	5.6980936E7	MS/MS	STY:79.9663@FNDS(0.0384)EGDDT(0.0472)EET(0.0472)EDY(0.8673)R;
FNDSEGDDTEETEDYR	FNDSEGDDTEET[79.9663]EDYR	K	Q	392	407	16	2	12T(79.9663)	sp|Q9NYF8-2|BCLF1_HUMAN	Q9NYF8-2	BCLF1_HUMAN	BCLAF1	Isoform 2 of Bcl-2-associated transcription factor 1		sp|Q9NYF8-3|BCLF1_HUMAN, sp|Q9NYF8|BCLF1_HUMAN	1	5.6980936E7	MS/MS	STY:79.9663@FNDS(0.0255)EGDDT(0.0255)EET(0.4745)EDY(0.4745)R;
FNDSEGDDTEETEDYR	FNDS[79.9663]EGDDTEETEDYR	K	Q	392	407	16	2	4S(79.9663)	sp|Q9NYF8-2|BCLF1_HUMAN	Q9NYF8-2	BCLF1_HUMAN	BCLAF1	Isoform 2 of Bcl-2-associated transcription factor 1		sp|Q9NYF8-3|BCLF1_HUMAN, sp|Q9NYF8|BCLF1_HUMAN	7	6.564972E7	MS/MS	STY:79.9663@FNDS(0.9298)EGDDT(0.0239)EET(0.0239)EDY(0.0225)R;
FNDSEGDDTEETEDYR	FNDS[79.9663]EGDDTEET[79.9663]EDYR	K	Q	392	407	16	2	12T(79.9663),4S(79.9663)	sp|Q9NYF8-2|BCLF1_HUMAN	Q9NYF8-2	BCLF1_HUMAN	BCLAF1	Isoform 2 of Bcl-2-associated transcription factor 1		sp|Q9NYF8-3|BCLF1_HUMAN, sp|Q9NYF8|BCLF1_HUMAN	2	1.3317526E7	MS/MS	STY:79.9663@FNDS(0.8779)EGDDT(0.1882)EET(0.8747)EDY(0.0592)R;
FNDSEGDDTEETEDYR	FNDS[79.9663]EGDDT[79.9663]EETEDYR	K	Q	392	407	16	2	4S(79.9663),9T(79.9663)	sp|Q9NYF8-2|BCLF1_HUMAN	Q9NYF8-2	BCLF1_HUMAN	BCLAF1	Isoform 2 of Bcl-2-associated transcription factor 1		sp|Q9NYF8-3|BCLF1_HUMAN, sp|Q9NYF8|BCLF1_HUMAN	2	1.3317526E7	MS/MS	STY:79.9663@FNDS(0.6590)EGDDT(0.6143)EET(0.6143)EDY(0.1123)R;
FNEEHIPDSPFVVPVASPSGDAR	FNEEHIPDSPFVVPVAS[79.9663]PSGDAR	K	R	2303	2325	23	3	17S(79.9663)	sp|P21333-2|FLNA_HUMAN	P21333-2	FLNA_HUMAN	FLNA	Isoform 2 of Filamin-A		sp|P21333|FLNA_HUMAN	3	1.756956E7	MS/MS	STY:79.9663@FNEEHIPDS(0.0344)PFVVPVAS(0.4828)PS(0.4828)GDAR;
FNEEHIPDSPFVVPVASPSGDAR	FNEEHIPDS[79.9663]PFVVPVASPSGDAR	K	R	2303	2325	23	3	9S(79.9663)	sp|P21333-2|FLNA_HUMAN	P21333-2	FLNA_HUMAN	FLNA	Isoform 2 of Filamin-A		sp|P21333|FLNA_HUMAN	2	1.2687075E7	MS/MS	STY:79.9663@FNEEHIPDS(0.4896)PFVVPVAS(0.4896)PS(0.0208)GDAR;
FPDRLAEDEGDSEPEAVGQSR	FPDRLAEDEGDSEPEAVGQS[79.9663]R	K	G	1453	1473	21	3	20S(79.9663)	sp|Q9UIG0-2|BAZ1B_HUMAN	Q9UIG0-2	BAZ1B_HUMAN	BAZ1B	Isoform 2 of Tyrosine-protein kinase BAZ1B		sp|Q9UIG0|BAZ1B_HUMAN	1	2.98011e+06	MS/MS	STY:79.9663@FPDRLAEDEGDS(0.3130)EPEAVGQS(0.6870)R;
FPDRLAEDEGDSEPEAVGQSR	FPDRLAEDEGDS[79.9663]EPEAVGQSR	K	G	1453	1473	21	3	12S(79.9663)	sp|Q9UIG0-2|BAZ1B_HUMAN	Q9UIG0-2	BAZ1B_HUMAN	BAZ1B	Isoform 2 of Tyrosine-protein kinase BAZ1B		sp|Q9UIG0|BAZ1B_HUMAN	1	2.98011e+06	MS/MS	STY:79.9663@FPDRLAEDEGDS(0.9230)EPEAVGQS(0.0770)R;
FPPEDFRHSPEDFR	FPPEDFRHS[79.9663]PEDFR	R	R	567	580	14	3	9S(79.9663)	sp|Q8IXT5|RB12B_HUMAN	Q8IXT5	RB12B_HUMAN	RBM12B	RNA-binding protein 12B			1	5.38651e+06	MS/MS	STY:79.9663@FPPEDFRHS(1.0000)PEDFR;
FPSPHPSPAK	FPS[79.9663]PHPS[79.9663]PAK	K	L	310	319	10	2	3S(79.9663),7S(79.9663)	sp|O14681-3|EI24_HUMAN	O14681-3	EI24_HUMAN	EI24	Isoform 2 of Etoposide-induced protein 2.4 homolog		sp|O14681|EI24_HUMAN	1	1.95093e+06	MS/MS	STY:79.9663@FPS(1.0000)PHPS(1.0000)PAK;
FQSEEQQQTEDELQDK	FQSEEQQQT[79.9663]EDELQDK	K	I	48	63	16	2,3	9T(79.9663)	sp|P02666|CASB_BOVIN	P02666	CASB_BOVIN	CSN2	Beta-casein			9	5.7821645E8	MS/MS	STY:79.9663@FQS(0.0587)EEQQQT(0.9413)EDELQDK;
FQSEEQQQTEDELQDK	FQS[79.9663]EEQQQTEDELQDK	K	I	48	63	16	2,3	3S(79.9663)	sp|P02666|CASB_BOVIN	P02666	CASB_BOVIN	CSN2	Beta-casein			30	5.8689075E8	MS/MS	STY:79.9663@FQS(0.9419)EEQQQT(0.0581)EDELQDK;
FSEMMNNMGGDEDVDLPEVDGADDDSQDSDDEK	FSEMMNNMGGDEDVDLPEVDGADDDSQDS[79.9663]DDEK	R	M	123	155	33	3	29S(79.9663)	sp|Q15185|TEBP_HUMAN	Q15185	TEBP_HUMAN	PTGES3	Prostaglandin E synthase 3		sp|Q15185-2|TEBP_HUMAN	1	1.2833435E7	MS/MS	STY:79.9663@FS(0.2628)EMMNNMGGDEDVDLPEVDGADDDS(0.0398)QDS(0.6974)DDEK;
FSEMMNNMGGDEDVDLPEVDGADDDSQDSDDEK	FSEMMNNMGGDEDVDLPEVDGADDDS[79.9663]QDSDDEK	R	M	123	155	33	3	26S(79.9663)	sp|Q15185|TEBP_HUMAN	Q15185	TEBP_HUMAN	PTGES3	Prostaglandin E synthase 3		sp|Q15185-2|TEBP_HUMAN	1	1.2833435E7	MS/MS	STY:79.9663@FS(0.1538)EMMNNMGGDEDVDLPEVDGADDDS(0.4273)QDS(0.4189)DDEK;
FSEMMNNMGGDEDVDLPEVDGADDDSQDSDDEK	FSEMMNNMGGDEDVDLPEVDGADDDS[79.9663]QDS[79.9663]DDEK	R	M	123	155	33	3	26S(79.9663),29S(79.9663)	sp|Q15185|TEBP_HUMAN	Q15185	TEBP_HUMAN	PTGES3	Prostaglandin E synthase 3		sp|Q15185-2|TEBP_HUMAN	4	3.4563984E8	MS/MS	STY:79.9663@FS(0.2335)EMMNNMGGDEDVDLPEVDGADDDS(0.8831)QDS(0.8834)DDEK;
FSEMMNNMGGDEDVDLPEVDGADDDSQDSDDEKMPDLE	FSEMMNNMGGDEDVDLPEVDGADDDS[79.9663]QDS[79.9663]DDEKMPDLE	R	-	123	160	38	3	26S(79.9663),29S(79.9663)	sp|Q15185|TEBP_HUMAN	Q15185	TEBP_HUMAN	PTGES3	Prostaglandin E synthase 3		sp|Q15185-2|TEBP_HUMAN	1	7.0220048E7	MS/MS	STY:79.9663@FS(0.6221)EMMNNMGGDEDVDLPEVDGADDDS(0.6918)QDS(0.6861)DDEKMPDLE;
FSEMMNNMGGDEDVDLPEVDGADDDSQDSDDEKMPDLE	FSEMMNNM[15.9949]GGDEDVDLPEVDGADDDS[79.9663]QDS[79.9663]DDEKMPDLE	R	-	123	160	38	3	26S(79.9663),29S(79.9663),8M(15.9949)	sp|Q15185|TEBP_HUMAN	Q15185	TEBP_HUMAN	PTGES3	Prostaglandin E synthase 3		sp|Q15185-2|TEBP_HUMAN	2	2.8666792E7	MS/MS	STY:79.9663@FS(0.5968)EMMNNMGGDEDVDLPEVDGADDDS(0.7006)QDS(0.7026)DDEKMPDLE;M:15.9949@FSEM(0.0196)M(0.0196)NNM(0.5433)GGDEDVDLPEVDGADDDSQDSDDEKM(0.4175)PDLE;
FSEMMNNMGGDEDVDLPEVDGADDDSQDSDDEK	FSEM[15.9949]MNNMGGDEDVDLPEVDGADDDSQDS[79.9663]DDEK	R	M	123	155	33	3	29S(79.9663),4M(15.9949)	sp|Q15185|TEBP_HUMAN	Q15185	TEBP_HUMAN	PTGES3	Prostaglandin E synthase 3		sp|Q15185-2|TEBP_HUMAN	1	2.168084E7	MS/MS	STY:79.9663@FS(0.0348)EMMNNMGGDEDVDLPEVDGADDDS(0.0654)QDS(0.8999)DDEK;M:15.9949@FSEM(0.3467)M(0.3467)NNM(0.3067)GGDEDVDLPEVDGADDDSQDSDDEK;
FSEMMNNMGGDEDVDLPEVDGADDDSQDSDDEK	FSEM[15.9949]MNNMGGDEDVDLPEVDGADDDS[79.9663]QDSDDEK	R	M	123	155	33	3	26S(79.9663),4M(15.9949)	sp|Q15185|TEBP_HUMAN	Q15185	TEBP_HUMAN	PTGES3	Prostaglandin E synthase 3		sp|Q15185-2|TEBP_HUMAN	1	2.168084E7	MS/MS	STY:79.9663@FS(0.0850)EMMNNMGGDEDVDLPEVDGADDDS(0.4575)QDS(0.4575)DDEK;M:15.9949@FSEM(0.3333)M(0.3333)NNM(0.3333)GGDEDVDLPEVDGADDDSQDSDDEK;
FSEMMNNMGGDEDVDLPEVDGADDDSQDSDDEK	FSEM[15.9949]MNNMGGDEDVDLPEVDGADDDS[79.9663]QDS[79.9663]DDEK	R	M	123	155	33	3	26S(79.9663),29S(79.9663),4M(15.9949)	sp|Q15185|TEBP_HUMAN	Q15185	TEBP_HUMAN	PTGES3	Prostaglandin E synthase 3		sp|Q15185-2|TEBP_HUMAN	3	2.69746144E8	MS/MS	STY:79.9663@FS(0.1115)EMMNNMGGDEDVDLPEVDGADDDS(0.9443)QDS(0.9443)DDEK;M:15.9949@FSEM(0.3660)M(0.3660)NNM(0.2681)GGDEDVDLPEVDGADDDSQDSDDEK;
FSEMMNNMGGDEDVDLPEVDGADDDSQDSDDEK	FSEM[15.9949]MNNM[15.9949]GGDEDVDLPEVDGADDDSQDS[79.9663]DDEK	R	M	123	155	33	3	29S(79.9663),4M(15.9949),8M(15.9949)	sp|Q15185|TEBP_HUMAN	Q15185	TEBP_HUMAN	PTGES3	Prostaglandin E synthase 3		sp|Q15185-2|TEBP_HUMAN	1	5.8387e+06	MS/MS	STY:79.9663@FS(0.3674)EMMNNMGGDEDVDLPEVDGADDDS(0.1815)QDS(0.4511)DDEK;M:15.9949@FSEM(0.6570)M(0.6570)NNM(0.6859)GGDEDVDLPEVDGADDDSQDSDDEK;
FSGEEGEIEDDESGTENREEK	FSGEEGEIEDDES[79.9663]GTENREEK	K	D	927	947	21	2,3	13S(79.9663)	sp|Q9Y2W1|TR150_HUMAN	Q9Y2W1	TR150_HUMAN	THRAP3	Thyroid hormone receptor-associated protein 3			3	3.37183E7	MS/MS	STY:79.9663@FS(0.0274)GEEGEIEDDES(0.4863)GT(0.4863)ENREEK;
FSEMMNNMGGDEDVDLPEVDGADDDSQDSDDEK	FS[79.9663]EMMNNMGGDEDVDLPEVDGADDDSQDS[79.9663]DDEK	R	M	123	155	33	3	29S(79.9663),2S(79.9663)	sp|Q15185|TEBP_HUMAN	Q15185	TEBP_HUMAN	PTGES3	Prostaglandin E synthase 3		sp|Q15185-2|TEBP_HUMAN	2	0	MS/MS	STY:79.9663@FS(0.8867)EMMNNMGGDEDVDLPEVDGADDDS(0.2055)QDS(0.9078)DDEK;
FSEMMNNMGGDEDVDLPEVDGADDDSQDSDDEK	FS[79.9663]EMMNNMGGDEDVDLPEVDGADDDS[79.9663]QDSDDEK	R	M	123	155	33	3	26S(79.9663),2S(79.9663)	sp|Q15185|TEBP_HUMAN	Q15185	TEBP_HUMAN	PTGES3	Prostaglandin E synthase 3		sp|Q15185-2|TEBP_HUMAN	2	3.30045248E8	MS/MS	STY:79.9663@FS(0.9221)EMMNNMGGDEDVDLPEVDGADDDS(0.9321)QDS(0.1458)DDEK;
FSEMMNNMGGDEDVDLPEVDGADDDSQDSDDEKMPDLE	FS[79.9663]EMMNNMGGDEDVDLPEVDGADDDS[79.9663]QDSDDEKMPDLE	R	-	123	160	38	3	26S(79.9663),2S(79.9663)	sp|Q15185|TEBP_HUMAN	Q15185	TEBP_HUMAN	PTGES3	Prostaglandin E synthase 3		sp|Q15185-2|TEBP_HUMAN	3	7.0220048E7	MS/MS	STY:79.9663@FS(0.8774)EMMNNMGGDEDVDLPEVDGADDDS(0.8859)QDS(0.2367)DDEKMPDLE;
FSEMMNNMGGDEDVDLPEVDGADDDSQDSDDEK	FS[79.9663]EMMNNM[15.9949]GGDEDVDLPEVDGADDDSQDS[79.9663]DDEK	R	M	123	155	33	3	29S(79.9663),2S(79.9663),8M(15.9949)	sp|Q15185|TEBP_HUMAN	Q15185	TEBP_HUMAN	PTGES3	Prostaglandin E synthase 3		sp|Q15185-2|TEBP_HUMAN	1	2.67787104E8	MS/MS	STY:79.9663@FS(0.8334)EMMNNMGGDEDVDLPEVDGADDDS(0.3252)QDS(0.8413)DDEK;M:15.9949@FSEM(0.0797)M(0.0797)NNM(0.8405)GGDEDVDLPEVDGADDDSQDSDDEK;
FSEMMNNMGGDEDVDLPEVDGADDDSQDSDDEK	FS[79.9663]EMMNNM[15.9949]GGDEDVDLPEVDGADDDS[79.9663]QDSDDEK	R	M	123	155	33	3	26S(79.9663),2S(79.9663),8M(15.9949)	sp|Q15185|TEBP_HUMAN	Q15185	TEBP_HUMAN	PTGES3	Prostaglandin E synthase 3		sp|Q15185-2|TEBP_HUMAN	1	2.67787104E8	MS/MS	STY:79.9663@FS(0.6820)EMMNNMGGDEDVDLPEVDGADDDS(0.6590)QDS(0.6590)DDEK;M:15.9949@FSEM(0.0400)M(0.0400)NNM(0.9199)GGDEDVDLPEVDGADDDSQDSDDEK;
FSEMMNNMGGDEDVDLPEVDGADDDSQDSDDEK	FS[79.9663]EMM[15.9949]NNMGGDEDVDLPEVDGADDDSQDSDDEK	R	M	123	155	33	3	2S(79.9663),5M(15.9949)	sp|Q15185|TEBP_HUMAN	Q15185	TEBP_HUMAN	PTGES3	Prostaglandin E synthase 3		sp|Q15185-2|TEBP_HUMAN	1	0	MS/MS	STY:79.9663@FS(0.8997)EMMNNMGGDEDVDLPEVDGADDDS(0.0502)QDS(0.0502)DDEK;M:15.9949@FSEM(0.1088)M(0.4456)NNM(0.4456)GGDEDVDLPEVDGADDDSQDSDDEK;
FSEMMNNMGGDEDVDLPEVDGADDDSQDSDDEK	FS[79.9663]EM[15.9949]MNNMGGDEDVDLPEVDGADDDSQDS[79.9663]DDEK	R	M	123	155	33	3	29S(79.9663),2S(79.9663),4M(15.9949)	sp|Q15185|TEBP_HUMAN	Q15185	TEBP_HUMAN	PTGES3	Prostaglandin E synthase 3		sp|Q15185-2|TEBP_HUMAN	2	2.69746144E8	MS/MS	STY:79.9663@FS(0.8852)EMMNNMGGDEDVDLPEVDGADDDS(0.2299)QDS(0.8849)DDEK;M:15.9949@FSEM(0.4227)M(0.4227)NNM(0.1547)GGDEDVDLPEVDGADDDSQDSDDEK;
FSEMMNNMGGDEDVDLPEVDGADDDSQDSDDEK	FS[79.9663]EM[15.9949]MNNMGGDEDVDLPEVDGADDDS[79.9663]QDSDDEK	R	M	123	155	33	3	26S(79.9663),2S(79.9663),4M(15.9949)	sp|Q15185|TEBP_HUMAN	Q15185	TEBP_HUMAN	PTGES3	Prostaglandin E synthase 3		sp|Q15185-2|TEBP_HUMAN	1	9851202	MS/MS	STY:79.9663@FS(0.6805)EMMNNMGGDEDVDLPEVDGADDDS(0.6598)QDS(0.6598)DDEK;M:15.9949@FSEM(0.3333)M(0.3333)NNM(0.3333)GGDEDVDLPEVDGADDDSQDSDDEK;
FSPTMGR	FS[79.9663]PTMGR	R	H	394	400	7	2	2S(79.9663)	sp|P78344-2|IF4G2_HUMAN	P78344-2	IF4G2_HUMAN	EIF4G2	Isoform 2 of Eukaryotic translation initiation factor 4 gamma 2		sp|P78344|IF4G2_HUMAN	1	0	MS/MS	STY:79.9663@FS(0.5000)PT(0.5000)MGR;
FSSQQAATKQSNASSDVEVEEK	FS[79.9663]S[79.9663]QQAATKQSNASSDVEVEEK	K	E	92	113	22	3	2S(79.9663),3S(79.9663)	sp|O75475-2|PSIP1_HUMAN	O75475-2	PSIP1_HUMAN	PSIP1	Isoform 2 of PC4 and SFRS1-interacting protein		sp|O75475-3|PSIP1_HUMAN, sp|O75475|PSIP1_HUMAN	2	2.65604e+06	MS/MS	STY:79.9663@FS(0.3778)S(0.3244)QQAAT(0.3244)KQS(0.3244)NAS(0.3244)S(0.3244)DVEVEEK;
FTGYQAIQQQSSSETEGEGGNTADASSEEEGDRVEEDGK	FTGYQAIQQQS[79.9663]S[79.9663]SETEGEGGNTADASSEEEGDRVEEDGK	K	G	96	134	39	3	11S(79.9663),12S(79.9663)	sp|Q9Y3E1|HDGR3_HUMAN	Q9Y3E1	HDGR3_HUMAN	HDGFL3	Hepatoma-derived growth factor-related protein 3			1	3.6657304E7	MS/MS	STY:79.9663@FT(0.0201)GY(0.0201)QAIQQQS(0.2800)S(0.2800)S(0.2800)ET(0.2800)EGEGGNT(0.2800)ADAS(0.2800)S(0.2800)EEEGDRVEEDGK;
FTGYQAIQQQSSSETEGEGGNTADASSEEEGDRVEEDGK	FT[79.9663]GY[79.9663]QAIQQQSSSETEGEGGNTADASSEEEGDRVEEDGK	K	G	96	134	39	3	2T(79.9663),4Y(79.9663)	sp|Q9Y3E1|HDGR3_HUMAN	Q9Y3E1	HDGR3_HUMAN	HDGFL3	Hepatoma-derived growth factor-related protein 3			1	3.6657304E7	MS/MS	STY:79.9663@FT(0.2445)GY(0.2445)QAIQQQS(0.2445)S(0.2445)S(0.2445)ET(0.2445)EGEGGNT(0.1777)ADAS(0.1777)S(0.1777)EEEGDRVEEDGK;
FVPAENDSILMNPAQDGEVQLSQNDDK	FVPAENDSILMNPAQDGEVQLS[79.9663]QNDDK	K	T	564	590	27	3	22S(79.9663)	sp|Q12888-2|TP53B_HUMAN	Q12888-2	TP53B_HUMAN	TP53BP1	Isoform 2 of TP53-binding protein 1		sp|Q12888-3|TP53B_HUMAN, sp|Q12888|TP53B_HUMAN	1	1.3410474E7	MS/MS	STY:79.9663@FVPAENDS(0.2543)ILMNPAQDGEVQLS(0.7457)QNDDK;
FVSEGDGGR	FVS[79.9663]EGDGGR	R	L	444	452	9	2	3S(79.9663)	sp|Q53EL6-2|PDCD4_HUMAN	Q53EL6-2	PDCD4_HUMAN	PDCD4	Isoform 2 of Programmed cell death protein 4		sp|Q53EL6|PDCD4_HUMAN	2	1.7150728E7	MS/MS	STY:79.9663@FVS(1.0000)EGDGGR;
GAAAADLLSSSPESQHGGTQSPGGGQPLLQPTK	GAAAADLLSSSPESQHGGT[79.9663]QSPGGGQPLLQPTK	R	V	1113	1145	33	3	19T(79.9663)	sp|Q9H3S7|PTN23_HUMAN	Q9H3S7	PTN23_HUMAN	PTPN23	Tyrosine-protein phosphatase non-receptor type 23			1	6211254	MS/MS	STY:79.9663@GAAAADLLS(0.0215)S(0.0215)S(0.0215)PES(0.0215)QHGGT(0.8546)QS(0.0295)PGGGQPLLQPT(0.0300)K;
GAAAADLLSSSPESQHGGTQSPGGGQPLLQPTK	GAAAADLLSSS[79.9663]PESQHGGTQSPGGGQPLLQPTK	R	V	1113	1145	33	3	11S(79.9663)	sp|Q9H3S7|PTN23_HUMAN	Q9H3S7	PTN23_HUMAN	PTPN23	Tyrosine-protein phosphatase non-receptor type 23			1	0	MS/MS	STY:79.9663@GAAAADLLS(0.0485)S(0.0485)S(0.1806)PES(0.1806)QHGGT(0.1806)QS(0.1806)PGGGQPLLQPT(0.1806)K;
GAAEEEQQDSGSEPRGDEDDIPLGPQSNVSLLDQHQHLK	GAAEEEQQDSGSEPRGDEDDIPLGPQS[79.9663]NVSLLDQHQHLK	K	E	57	95	39	4	27S(79.9663)	sp|Q9UJV9|DDX41_HUMAN	Q9UJV9	DDX41_HUMAN	DDX41	Probable ATP-dependent RNA helicase DDX41			1	2.81538e+06	MS/MS	STY:79.9663@GAAEEEQQDS(0.3080)GS(0.0244)EPRGDEDDIPLGPQS(0.3338)NVS(0.3338)LLDQHQHLK;
GAAEEEQQDSGSEPRGDEDDIPLGPQSNVSLLDQHQHLK	GAAEEEQQDS[79.9663]GS[79.9663]EPRGDEDDIPLGPQSNVSLLDQHQHLK	K	E	57	95	39	4	10S(79.9663),12S(79.9663)	sp|Q9UJV9|DDX41_HUMAN	Q9UJV9	DDX41_HUMAN	DDX41	Probable ATP-dependent RNA helicase DDX41			1	5377196	MS/MS	STY:79.9663@GAAEEEQQDS(0.7871)GS(0.7871)EPRGDEDDIPLGPQS(0.2129)NVS(0.2129)LLDQHQHLK;
GAASQARGSDSEDGEFEIQAEDDAR	GAAS[79.9663]QARGS[79.9663]DSEDGEFEIQAEDDAR	R	A	31	55	25	3	4S(79.9663),9S(79.9663)	sp|Q8TDD1-2|DDX54_HUMAN	Q8TDD1-2	DDX54_HUMAN	DDX54	Isoform 2 of ATP-dependent RNA helicase DDX54		sp|Q8TDD1|DDX54_HUMAN	2	7.56667e+06	MS/MS	STY:79.9663@GAAS(0.6667)QARGS(0.6667)DS(0.6667)EDGEFEIQAEDDAR;
GADNDGSGSESGYTTPK	GADNDGSGSESGY[79.9663]TTPK	K	K	206	222	17	2	13Y(79.9663)	sp|Q7Z417|NUFP2_HUMAN	Q7Z417	NUFP2_HUMAN	NUFIP2	FMR1-interacting protein NUFIP2			1	0	MS/MS	STY:79.9663@GADNDGS(0.0105)GS(0.0105)ES(0.0105)GY(0.3228)T(0.3228)T(0.3228)PK;
GADNDGSGSESGYTTPK	GADNDGS[79.9663]GS[79.9663]ESGYTTPK	K	K	206	222	17	2	7S(79.9663),9S(79.9663)	sp|Q7Z417|NUFP2_HUMAN	Q7Z417	NUFP2_HUMAN	NUFIP2	FMR1-interacting protein NUFIP2			4	1.103378E7	MS/MS	STY:79.9663@GADNDGS(0.8872)GS(0.8863)ES(0.0566)GY(0.0566)T(0.0566)T(0.0566)PK;
GAEAFGDSEEDGEDVFEVEK	GAEAFGDS[79.9663]EEDGEDVFEVEK	R	I	44	63	20	2	8S(79.9663)	sp|Q99549-2|MPP8_HUMAN	Q99549-2	MPP8_HUMAN	MPHOSPH8	Isoform 2 of M-phase phosphoprotein 8		sp|Q99549|MPP8_HUMAN	1	0	MS/MS	STY:79.9663@GAEAFGDS(1.0000)EEDGEDVFEVEK;
GAEETSWSGEER	GAEETSWS[79.9663]GEER	K	A	958	969	12	2	8S(79.9663)	sp|Q9H7N4|SFR19_HUMAN	Q9H7N4	SFR19_HUMAN	SCAF1	Splicing factor, arginine/serine-rich 19			1	2.22151e+06	MS/MS	STY:79.9663@GAEET(0.0389)S(0.0389)WS(0.9222)GEER;
GAESPFEEK	GAES[79.9663]PFEEK	R	S	1424	1432	9	2	4S(79.9663)	sp|P46821|MAP1B_HUMAN	P46821	MAP1B_HUMAN	MAP1B	Microtubule-associated protein 1B			1	4.06262e+06	MS/MS	STY:79.9663@GAES(1.0000)PFEEK;
GAGATSGSPPAGRN	GAGAT[79.9663]SGSPPAGRN	K	-	194	207	14	2	5T(79.9663)	sp|P16455|MGMT_HUMAN	P16455	MGMT_HUMAN	MGMT	Methylated-DNA--protein-cysteine methyltransferase			1	4.97717e+06	MS/MS	STY:79.9663@GAGAT(0.3333)S(0.3333)GS(0.3333)PPAGRN;
GAGDGSDEEVDGK	GAGDGS[79.9663]DEEVDGK	K	A	1938	1950	13	2	6S(79.9663)	sp|P35579|MYH9_HUMAN	P35579	MYH9_HUMAN	MYH9	Myosin-9		sp|P35579-2|MYH9_HUMAN	5	1.40024304E8	MS/MS	STY:79.9663@GAGDGS(1.0000)DEEVDGK;
GAGDGSDEEVDGKADGAEAK	GAGDGS[79.9663]DEEVDGKADGAEAK	K	P	1938	1957	20	2,3	6S(79.9663)	sp|P35579|MYH9_HUMAN	P35579	MYH9_HUMAN	MYH9	Myosin-9		sp|P35579-2|MYH9_HUMAN	6	2.4525456E7	MS/MS	STY:79.9663@GAGDGS(1.0000)DEEVDGKADGAEAK;
GAGDGSDEEVDGKADGAEAKPAE	GAGDGS[79.9663]DEEVDGKADGAEAKPAE	K	-	1938	1960	23	2,3	6S(79.9663)	sp|P35579|MYH9_HUMAN	P35579	MYH9_HUMAN	MYH9	Myosin-9		sp|P35579-2|MYH9_HUMAN	5	8.002644E7	MS/MS	STY:79.9663@GAGDGS(1.0000)DEEVDGKADGAEAKPAE;
GAPSSPATGVLPSPQGK	GAPSSPATGVLPS[79.9663]PQGK	R	S	1594	1610	17	2	13S(79.9663)	sp|Q5SRE5-2|NU188_HUMAN	Q5SRE5-2	NU188_HUMAN	NUP188	Isoform 2 of Nucleoporin NUP188		sp|Q5SRE5|NU188_HUMAN	1	3.49211e+06	MS/MS	STY:79.9663@GAPS(0.0251)S(0.0251)PAT(0.0251)GVLPS(0.9248)PQGK;
GAPSSPATGVLPSPQGK	GAPS[79.9663]SPATGVLPSPQGK	R	S	1594	1610	17	2	4S(79.9663)	sp|Q5SRE5-2|NU188_HUMAN	Q5SRE5-2	NU188_HUMAN	NUP188	Isoform 2 of Nucleoporin NUP188		sp|Q5SRE5|NU188_HUMAN	1	4.22183e+06	MS/MS	STY:79.9663@GAPS(0.4640)S(0.4640)PAT(0.0360)GVLPS(0.0360)PQGK;
GAPSSPATGVLPSPQGK	GAPS[79.9663]S[79.9663]PATGVLPSPQGK	R	S	1594	1610	17	2	4S(79.9663),5S(79.9663)	sp|Q5SRE5-2|NU188_HUMAN	Q5SRE5-2	NU188_HUMAN	NUP188	Isoform 2 of Nucleoporin NUP188		sp|Q5SRE5|NU188_HUMAN	1	1.94763e+06	MS/MS	STY:79.9663@GAPS(0.5302)S(0.4899)PAT(0.4899)GVLPS(0.4899)PQGK;
GARPPAAGPGGDEDEDEEDTAPESALDTSLDK	GARPPAAGPGGDEDEDEEDTAPES[79.9663]ALDT[79.9663]SLDK	R	S	1160	1191	32	3	24S(79.9663),28T(79.9663)	sp|Q27J81-2|INF2_HUMAN	Q27J81-2	INF2_HUMAN	INF2	Isoform 2 of Inverted formin-2		sp|Q27J81|INF2_HUMAN	1	1.241491E7	MS/MS	STY:79.9663@GARPPAAGPGGDEDEDEEDT(0.2469)APES(0.6143)ALDT(0.5694)S(0.5694)LDK;
GARPPAAGPGGDEDEDEEDTAPESALDTSLDK	GARPPAAGPGGDEDEDEEDT[79.9663]APES[79.9663]ALDTSLDK	R	S	1160	1191	32	3	20T(79.9663),24S(79.9663)	sp|Q27J81-2|INF2_HUMAN	Q27J81-2	INF2_HUMAN	INF2	Isoform 2 of Inverted formin-2		sp|Q27J81|INF2_HUMAN	2	1.241491E7	MS/MS	STY:79.9663@GARPPAAGPGGDEDEDEEDT(0.6360)APES(0.6360)ALDT(0.6360)S(0.0919)LDK;
GARPPAAGPGGDEDEDEEDTAPESALDTSLDK	GARPPAAGPGGDEDEDEEDT[79.9663]APES[79.9663]ALDT[79.9663]SLDK	R	S	1160	1191	32	3	20T(79.9663),24S(79.9663),28T(79.9663)	sp|Q27J81-2|INF2_HUMAN	Q27J81-2	INF2_HUMAN	INF2	Isoform 2 of Inverted formin-2		sp|Q27J81|INF2_HUMAN	1	7451430	MS/MS	STY:79.9663@GARPPAAGPGGDEDEDEEDT(0.7609)APES(0.7608)ALDT(0.7392)S(0.7392)LDK;
GASAATGIPLESDEDSNDNDNDIENENCMHTN	GASAATGIPLESDEDSNDNDNDIENENC[57.0215]MHT[79.9663]N	K	-	950	981	32	3	28C(57.0215),31T(79.9663)	sp|Q9Y4E8|UBP15_HUMAN	Q9Y4E8	UBP15_HUMAN	USP15	Ubiquitin carboxyl-terminal hydrolase 15		sp|Q9Y4E8-2|UBP15_HUMAN, sp|Q9Y4E8-3|UBP15_HUMAN	1	0	MS/MS	STY:79.9663@GAS(0.0425)AAT(0.0425)GIPLES(0.0200)DEDS(0.0244)NDNDNDIENENCMHT(0.8705)N;
GASAATGIPLESDEDSNDNDNDIENENCMHTN	GASAATGIPLES[79.9663]DEDS[79.9663]NDNDNDIENENC[57.0215]MHTN	K	-	950	981	32	3	12S(79.9663),16S(79.9663),28C(57.0215)	sp|Q9Y4E8|UBP15_HUMAN	Q9Y4E8	UBP15_HUMAN	USP15	Ubiquitin carboxyl-terminal hydrolase 15		sp|Q9Y4E8-2|UBP15_HUMAN, sp|Q9Y4E8-3|UBP15_HUMAN	2	1.3001186E7	MS/MS	STY:79.9663@GAS(0.0568)AAT(0.0568)GIPLES(0.6705)DEDS(0.6705)NDNDNDIENENCMHT(0.5454)N;
GASAATGIPLESDEDSNDNDNDIENENCMHTN	GASAAT[79.9663]GIPLES[79.9663]DEDSNDNDNDIENENC[57.0215]MHTN	K	-	950	981	32	3	12S(79.9663),28C(57.0215),6T(79.9663)	sp|Q9Y4E8|UBP15_HUMAN	Q9Y4E8	UBP15_HUMAN	USP15	Ubiquitin carboxyl-terminal hydrolase 15		sp|Q9Y4E8-2|UBP15_HUMAN, sp|Q9Y4E8-3|UBP15_HUMAN	1	1.2208406E7	MS/MS	STY:79.9663@GAS(0.0396)AAT(0.6695)GIPLES(0.6622)DEDS(0.1786)NDNDNDIENENCMHT(0.4501)N;
GAVENEEDLPELSDSGDEAAWEDEDDADLPHGK	GAVENEEDLPELS[79.9663]DS[79.9663]GDEAAWEDEDDADLPHGK	R	Q	13	45	33	3	13S(79.9663),15S(79.9663)	sp|O60678|ANM3_HUMAN	O60678	ANM3_HUMAN	PRMT3	Protein arginine N-methyltransferase 3			3	3.6417588E7	MS/MS	STY:79.9663@GAVENEEDLPELS(1.0000)DS(1.0000)GDEAAWEDEDDADLPHGK;
GDDDEESDEEAVK	GDDDEES[79.9663]DEEAVK	K	K	613	625	13	2	7S(79.9663)	sp|O43395|PRPF3_HUMAN	O43395	PRPF3_HUMAN	PRPF3	U4/U6 small nuclear ribonucleoprotein Prp3			1	0	MS/MS	STY:79.9663@GDDDEES(1.0000)DEEAVK;
GDDDEESDEEAVKK	GDDDEES[79.9663]DEEAVKK	K	T	613	626	14	2	7S(79.9663)	sp|O43395|PRPF3_HUMAN	O43395	PRPF3_HUMAN	PRPF3	U4/U6 small nuclear ribonucleoprotein Prp3			1	5061289	MS/MS	STY:79.9663@GDDDEES(1.0000)DEEAVKK;
GDLAFGAPGPRPPSPFDDPADDPEHK	GDLAFGAPGPRPPS[79.9663]PFDDPADDPEHK	R	E	622	647	26	3	14S(79.9663)	sp|Q93074-2|MED12_HUMAN	Q93074-2	MED12_HUMAN	MED12	Isoform 2 of Mediator of RNA polymerase II transcription subunit 12		sp|Q93074-3|MED12_HUMAN, sp|Q93074|MED12_HUMAN	1	3909016	MS/MS	STY:79.9663@GDLAFGAPGPRPPS(1.0000)PFDDPADDPEHK;
GDLGPASPSQELGSQPVPGGDGAPALGK	GDLGPAS[79.9663]PSQELGSQPVPGGDGAPALGK	K	S	50	77	28	3	7S(79.9663)	sp|Q4KMQ1-2|TPRN_HUMAN	Q4KMQ1-2	TPRN_HUMAN	TPRN	Isoform 2 of Taperin		sp|Q4KMQ1-3|TPRN_HUMAN, sp|Q4KMQ1-4|TPRN_HUMAN, sp|Q4KMQ1|TPRN_HUMAN	1	0	MS/MS	STY:79.9663@GDLGPAS(0.3333)PS(0.3333)QELGS(0.3333)QPVPGGDGAPALGK;
GDMSDEDDENEFFDAPEIITMPENLGHK	GDMS[79.9663]DEDDENEFFDAPEIITM[15.9949]PENLGHK	K	R	348	375	28	3	21M(15.9949),4S(79.9663)	sp|P22059|OSBP1_HUMAN	P22059	OSBP1_HUMAN	OSBP	Oxysterol-binding protein 1			1	0	MS/MS	STY:79.9663@GDMS(0.8287)DEDDENEFFDAPEIIT(0.1713)MPENLGHK;M:15.9949@GDM(0.4551)SDEDDENEFFDAPEIITM(0.5449)PENLGHK;
GDPQQQSITHIAIPQEAYNAVHVSGSPTALAAVK	GDPQQQSITHIAIPQEAYNAVHVS[79.9663]GSPTALAAVK	R	L	320	353	34	3	24S(79.9663)	sp|Q2TAL8|QRIC1_HUMAN	Q2TAL8	QRIC1_HUMAN	QRICH1	Transcriptional regulator QRICH1			1	0	MS/MS	STY:79.9663@GDPQQQS(0.0116)IT(0.0116)HIAIPQEAY(0.0308)NAVHVS(0.7632)GS(0.0914)PT(0.0914)ALAAVK;
GDQPAASGDSDDDEPPPLPR	GDQPAAS[79.9663]GDSDDDEPPPLPR	R	L	48	67	20	2	7S(79.9663)	sp|O00264|PGRC1_HUMAN	O00264	PGRC1_HUMAN	PGRMC1	Membrane-associated progesterone receptor component 1		sp|O00264-2|PGRC1_HUMAN	2	5138098	MS/MS	STY:79.9663@GDQPAAS(0.5000)GDS(0.5000)DDDEPPPLPR;
GDRSPEPGQTWTR	GDRS[79.9663]PEPGQTWTR	K	E	90	102	13	2	4S(79.9663)	sp|Q09666|AHNK_HUMAN	Q09666	AHNK_HUMAN	AHNAK	Neuroblast differentiation-associated protein AHNAK		sp|Q09666-2|AHNK_HUMAN	1	5.79544e+06	MS/MS	STY:79.9663@GDRS(0.9305)PEPGQT(0.0347)WT(0.0347)R;
GDSIEEILADSEDEEDNEEEER	GDSIEEILADS[79.9663]EDEEDNEEEER	K	S	970	991	22	3	11S(79.9663)	sp|Q5JTH9-2|RRP12_HUMAN	Q5JTH9-2	RRP12_HUMAN	RRP12	Isoform 2 of RRP12-like protein		sp|Q5JTH9-3|RRP12_HUMAN, sp|Q5JTH9|RRP12_HUMAN	2	0	MS/MS	STY:79.9663@GDS(0.0754)IEEILADS(0.9246)EDEEDNEEEER;
GDSIEEILADSEDEEDNEEEERSR	GDSIEEILADS[79.9663]EDEEDNEEEERSR	K	G	970	993	24	3	11S(79.9663)	sp|Q5JTH9-2|RRP12_HUMAN	Q5JTH9-2	RRP12_HUMAN	RRP12	Isoform 2 of RRP12-like protein		sp|Q5JTH9-3|RRP12_HUMAN, sp|Q5JTH9|RRP12_HUMAN	1	0	MS/MS	STY:79.9663@GDS(0.0214)IEEILADS(0.6206)EDEEDNEEEERS(0.3579)R;
GDSESEEDEDLEVPVPSR	GDS[79.9663]ES[79.9663]EEDEDLEVPVPSR	K	F	76	93	18	2	3S(79.9663),5S(79.9663)	sp|P13861-2|KAP2_HUMAN	P13861-2	KAP2_HUMAN	PRKAR2A	Isoform 2 of cAMP-dependent protein kinase type II-alpha regulatory subunit		sp|P13861|KAP2_HUMAN	3	6.4983064E7	MS/MS	STY:79.9663@GDS(0.9444)ES(0.9444)EEDEDLEVPVPS(0.1111)R;
GDSESEEDEQDSEEVR	GDS[79.9663]ES[79.9663]EEDEQDSEEVR	R	L	13	28	16	2	3S(79.9663),5S(79.9663)	sp|Q9NZ63|TLS1_HUMAN	Q9NZ63	TLS1_HUMAN	C9orf78	Splicing factor C9orf78			1	0	MS/MS	STY:79.9663@GDS(0.6667)ES(0.6667)EEDEQDS(0.6667)EEVR;
GDSIEEILADSEDEEDNEEEER	GDS[79.9663]IEEILADSEDEEDNEEEER	K	S	970	991	22	3	3S(79.9663)	sp|Q5JTH9-2|RRP12_HUMAN	Q5JTH9-2	RRP12_HUMAN	RRP12	Isoform 2 of RRP12-like protein		sp|Q5JTH9-3|RRP12_HUMAN, sp|Q5JTH9|RRP12_HUMAN	1	0	MS/MS	STY:79.9663@GDS(0.5335)IEEILADS(0.4665)EDEEDNEEEER;
GDVTAEEAAGASPAK	GDVTAEEAAGAS[79.9663]PAK	R	A	11	25	15	2	12S(79.9663)	sp|P49006|MRP_HUMAN	P49006	MRP_HUMAN	MARCKSL1	MARCKS-related protein			1	0	MS/MS	STY:79.9663@GDVT(0.0594)AEEAAGAS(0.9406)PAK;
GDVTAEEAAGASPAK	GDVT[79.9663]AEEAAGASPAK	R	A	11	25	15	2	4T(79.9663)	sp|P49006|MRP_HUMAN	P49006	MRP_HUMAN	MARCKSL1	MARCKS-related protein			1	0	MS/MS	STY:79.9663@GDVT(0.5000)AEEAAGAS(0.5000)PAK;
GEAAAERPGEAAVASSPSK	GEAAAERPGEAAVAS[79.9663]SPSK	K	A	12	30	19	2,3	15S(79.9663)	sp|P29966|MARCS_HUMAN	P29966	MARCS_HUMAN	MARCKS	Myristoylated alanine-rich C-kinase substrate			4	3.7490804E7	MS/MS	STY:79.9663@GEAAAERPGEAAVAS(0.9256)S(0.0405)PS(0.0339)K;
GEAEQSEEEADEEDK	GEAEQS[79.9663]EEEADEEDK	K	A	1011	1025	15	2	6S(79.9663)	sp|P46821|MAP1B_HUMAN	P46821	MAP1B_HUMAN	MAP1B	Microtubule-associated protein 1B			2	0	MS/MS	STY:79.9663@GEAEQS(1.0000)EEEADEEDK;
GEAEQSEEEADEEDKAEDAREEEYEPEK	GEAEQS[79.9663]EEEADEEDKAEDAREEEYEPEK	K	M	1011	1038	28	3,4	6S(79.9663)	sp|P46821|MAP1B_HUMAN	P46821	MAP1B_HUMAN	MAP1B	Microtubule-associated protein 1B			7	1.26824256E8	MS/MS	STY:79.9663@GEAEQS(0.9174)EEEADEEDKAEDAREEEY(0.0826)EPEK;
GEAVLRPGLDAEPELSPEEQR	GEAVLRPGLDAEPELS[79.9663]PEEQR	K	V	44	64	21	3	16S(79.9663)	sp|Q9BRJ6|CG050_HUMAN	Q9BRJ6	CG050_HUMAN	C7orf50	Uncharacterized protein C7orf50			1	0	MS/MS	STY:79.9663@GEAVLRPGLDAEPELS(1.0000)PEEQR;
GEDSAEETEAK	GEDSAEET[79.9663]EAK	K	P	479	489	11	2	8T(79.9663)	sp|Q12906-7|ILF3_HUMAN	Q12906-7	ILF3_HUMAN	ILF3	Isoform 7 of Interleukin enhancer-binding factor 3		sp|Q12906-2|ILF3_HUMAN, sp|Q12906-3|ILF3_HUMAN, sp|Q12906-4|ILF3_HUMAN, sp|Q12906-5|ILF3_HUMAN, sp|Q12906-6|ILF3_HUMAN, sp|Q12906|ILF3_HUMAN	1	4.7385804E7	MS/MS	STY:79.9663@GEDS(0.0895)AEET(0.9105)EAK;
GEDSAEETEAK	GEDS[79.9663]AEETEAK	K	P	479	489	11	2	4S(79.9663)	sp|Q12906-7|ILF3_HUMAN	Q12906-7	ILF3_HUMAN	ILF3	Isoform 7 of Interleukin enhancer-binding factor 3		sp|Q12906-2|ILF3_HUMAN, sp|Q12906-3|ILF3_HUMAN, sp|Q12906-4|ILF3_HUMAN, sp|Q12906-5|ILF3_HUMAN, sp|Q12906-6|ILF3_HUMAN, sp|Q12906|ILF3_HUMAN	2	4.7385804E7	MS/MS	STY:79.9663@GEDS(0.5000)AEET(0.5000)EAK;
GEDVPSEEEEEEENGFEDRKDDSDDDGGGWITPSNIK	GEDVPS[79.9663]EEEEEEENGFEDRKDDS[79.9663]DDDGGGWITPSNIK	R	Q	179	215	37	4	23S(79.9663),6S(79.9663)	sp|Q9ULX3|NOB1_HUMAN	Q9ULX3	NOB1_HUMAN	NOB1	RNA-binding protein NOB1			1	0	MS/MS	STY:79.9663@GEDVPS(0.6449)EEEEEEENGFEDRKDDS(0.6449)DDDGGGWIT(0.6449)PS(0.0652)NIK;
GEEGSDDDETENGPKPK	GEEGSDDDET[79.9663]ENGPKPK	K	K	966	982	17	2	10T(79.9663)	sp|Q6PD62|CTR9_HUMAN	Q6PD62	CTR9_HUMAN	CTR9	RNA polymerase-associated protein CTR9 homolog			1	1.2566202E7	MS/MS	STY:79.9663@GEEGS(0.4917)DDDET(0.5083)ENGPKPK;
GEEGSDDDETENGPKPK	GEEGS[79.9663]DDDETENGPKPK	K	K	966	982	17	2	5S(79.9663)	sp|Q6PD62|CTR9_HUMAN	Q6PD62	CTR9_HUMAN	CTR9	RNA polymerase-associated protein CTR9 homolog			1	1.7116602E7	MS/MS	STY:79.9663@GEEGS(0.9226)DDDET(0.0774)ENGPKPK;
GEESSEEEEK	GEES[79.9663]S[79.9663]EEEEK	R	G	156	165	10	2	4S(79.9663),5S(79.9663)	sp|Q9BW71|HIRP3_HUMAN	Q9BW71	HIRP3_HUMAN	HIRIP3	HIRA-interacting protein 3			1	0	MS/MS	STY:79.9663@GEES(1.0000)S(1.0000)EEEEK;
GEFSASPMLK	GEFSAS[79.9663]PMLK	R	S	1119	1128	10	2	6S(79.9663)	sp|Q9UQ35|SRRM2_HUMAN	Q9UQ35	SRRM2_HUMAN	SRRM2	Serine/arginine repetitive matrix protein 2		sp|Q9UQ35-2|SRRM2_HUMAN	1	7911513	MS/MS	STY:79.9663@GEFS(0.0682)AS(0.9318)PMLK;
GEFSASPMLK	GEFSAS[79.9663]PM[15.9949]LK	R	S	1119	1128	10	2	6S(79.9663),8M(15.9949)	sp|Q9UQ35|SRRM2_HUMAN	Q9UQ35	SRRM2_HUMAN	SRRM2	Serine/arginine repetitive matrix protein 2		sp|Q9UQ35-2|SRRM2_HUMAN	1	4.63774e+06	MS/MS	STY:79.9663@GEFS(0.0714)AS(0.9286)PMLK;M:15.9949@GEFSASPM(1.0000)LK;
GEFSASPMLK	GEFS[79.9663]ASPMLK	R	S	1119	1128	10	2	4S(79.9663)	sp|Q9UQ35|SRRM2_HUMAN	Q9UQ35	SRRM2_HUMAN	SRRM2	Serine/arginine repetitive matrix protein 2		sp|Q9UQ35-2|SRRM2_HUMAN	1	7911513	MS/MS	STY:79.9663@GEFS(0.9068)AS(0.0932)PMLK;
GEGDAPFSEPGTTSTQRPSSPETATK	GEGDAPFSEPGTTSTQRPS[79.9663]SPETATK	R	Q	304	329	26	3	19S(79.9663)	sp|Q9UQ35|SRRM2_HUMAN	Q9UQ35	SRRM2_HUMAN	SRRM2	Serine/arginine repetitive matrix protein 2		sp|Q9UQ35-2|SRRM2_HUMAN, sp|Q9UQ35-3|SRRM2_HUMAN	1	5.1290076E7	MS/MS	STY:79.9663@GEGDAPFS(0.0077)EPGT(0.0077)T(0.0077)S(0.0077)T(0.0077)QRPS(0.8145)S(0.0100)PET(0.0685)AT(0.0685)K;
GEGDAPFSEPGTTSTQRPSSPETATK	GEGDAPFSEPGTT[79.9663]STQRPSSPETATK	R	Q	304	329	26	3	13T(79.9663)	sp|Q9UQ35|SRRM2_HUMAN	Q9UQ35	SRRM2_HUMAN	SRRM2	Serine/arginine repetitive matrix protein 2		sp|Q9UQ35-2|SRRM2_HUMAN, sp|Q9UQ35-3|SRRM2_HUMAN	2	2.4959628E7	MS/MS	STY:79.9663@GEGDAPFS(0.0073)EPGT(0.0204)T(0.5787)S(0.0268)T(0.0268)QRPS(0.0850)S(0.0850)PET(0.0850)AT(0.0850)K;
GEGDAPFSEPGTTSTQRPSSPETATK	GEGDAPFSEPGTT[79.9663]S[79.9663]TQRPSSPETATK	R	Q	304	329	26	3	13T(79.9663),14S(79.9663)	sp|Q9UQ35|SRRM2_HUMAN	Q9UQ35	SRRM2_HUMAN	SRRM2	Serine/arginine repetitive matrix protein 2		sp|Q9UQ35-2|SRRM2_HUMAN, sp|Q9UQ35-3|SRRM2_HUMAN	1	1.8825548E7	MS/MS	STY:79.9663@GEGDAPFS(0.0569)EPGT(0.0240)T(0.5072)S(0.5072)T(0.5072)QRPS(0.1733)S(0.0895)PET(0.0802)AT(0.0543)K;
GEGDAPFSEPGTTSTQRPSSPETATK	GEGDAPFSEPGT[79.9663]T[79.9663]STQRPSSPETATK	R	Q	304	329	26	3	12T(79.9663),13T(79.9663)	sp|Q9UQ35|SRRM2_HUMAN	Q9UQ35	SRRM2_HUMAN	SRRM2	Serine/arginine repetitive matrix protein 2		sp|Q9UQ35-2|SRRM2_HUMAN, sp|Q9UQ35-3|SRRM2_HUMAN	2	2.4267966E7	MS/MS	STY:79.9663@GEGDAPFS(0.0089)EPGT(0.3320)T(0.3320)S(0.0813)T(0.3320)QRPS(0.3320)S(0.3320)PET(0.2087)AT(0.0412)K;
GEGDAPFSEPGTTSTQRPSSPETATK	GEGDAPFS[79.9663]EPGTTSTQRPSSPETATK	R	Q	304	329	26	3	8S(79.9663)	sp|Q9UQ35|SRRM2_HUMAN	Q9UQ35	SRRM2_HUMAN	SRRM2	Serine/arginine repetitive matrix protein 2		sp|Q9UQ35-2|SRRM2_HUMAN, sp|Q9UQ35-3|SRRM2_HUMAN	1	0	MS/MS	STY:79.9663@GEGDAPFS(0.1111)EPGT(0.1111)T(0.1111)S(0.1111)T(0.1111)QRPS(0.1111)S(0.1111)PET(0.1111)AT(0.1111)K;
GEGDIHENVDTDLPGSLGQSEEKPVPAAPVPSPVAPAPVPSR	GEGDIHENVDTDLPGSLGQSEEKPVPAAPVPS[79.9663]PVAPAPVPSR	K	R	54	95	42	4	32S(79.9663)	sp|Q9UK76-3|JUPI1_HUMAN	Q9UK76-3	JUPI1_HUMAN	JPT1	Isoform 3 of Jupiter microtubule associated homolog 1		sp|Q9UK76|JUPI1_HUMAN	2	1.1146251E7	MS/MS	STY:79.9663@GEGDIHENVDT(0.0726)DLPGS(0.0314)LGQS(0.0176)EEKPVPAAPVPS(0.8174)PVAPAPVPS(0.0609)R;
GEGDIHENVDTDLPGSLGQSEEKPVPAAPVPSPVAPAPVPSR	GEGDIHENVDTDLPGSLGQS[79.9663]EEKPVPAAPVPSPVAPAPVPSR	K	R	54	95	42	4	20S(79.9663)	sp|Q9UK76-3|JUPI1_HUMAN	Q9UK76-3	JUPI1_HUMAN	JPT1	Isoform 3 of Jupiter microtubule associated homolog 1		sp|Q9UK76|JUPI1_HUMAN	1	5694746	MS/MS	STY:79.9663@GEGDIHENVDT(0.0118)DLPGS(0.1592)LGQS(0.4097)EEKPVPAAPVPS(0.4097)PVAPAPVPS(0.0096)R;
GEGDIHENVDTDLPGSLGQSEEKPVPAAPVPSPVAPAPVPSR	GEGDIHENVDT[79.9663]DLPGSLGQSEEKPVPAAPVPSPVAPAPVPSR	K	R	54	95	42	4	11T(79.9663)	sp|Q9UK76-3|JUPI1_HUMAN	Q9UK76-3	JUPI1_HUMAN	JPT1	Isoform 3 of Jupiter microtubule associated homolog 1		sp|Q9UK76|JUPI1_HUMAN	1	0	MS/MS	STY:79.9663@GEGDIHENVDT(0.2000)DLPGS(0.2000)LGQS(0.2000)EEKPVPAAPVPS(0.2000)PVAPAPVPS(0.2000)R;
GEPAAAAAPEAGASPVEK	GEPAAAAAPEAGAS[79.9663]PVEK	K	E	88	105	18	2	14S(79.9663)	sp|P29966|MARCS_HUMAN	P29966	MARCS_HUMAN	MARCKS	Myristoylated alanine-rich C-kinase substrate			4	1.3973508E7	MS/MS	STY:79.9663@GEPAAAAAPEAGAS(1.0000)PVEK;
GEPNVSYICSR	GEPNVS[79.9663]YIC[57.0215]SR	R	Y	273	283	11	2	6S(79.9663),9C(57.0215)	sp|P49840|GSK3A_HUMAN	P49840	GSK3A_HUMAN	GSK3A	Glycogen synthase kinase-3 alpha	GSK3B	sp|P49841-2|GSK3B_HUMAN, sp|P49841|GSK3B_HUMAN	13	5.0131096E7	MS/MS	STY:79.9663@GEPNVS(0.7126)Y(0.2562)ICS(0.0312)R;
GESLSLPGPSPPPDGTEQVIISR	GES[79.9663]LSLPGPSPPPDGTEQVIISR	K	V	637	659	23	3	3S(79.9663)	sp|Q9BZQ8|NIBA1_HUMAN	Q9BZQ8	NIBA1_HUMAN	NIBAN1	Protein Niban 1			1	1.72165e+06	MS/MS	STY:79.9663@GES(0.3244)LS(0.3244)LPGPS(0.3244)PPPDGT(0.0134)EQVIIS(0.0134)R;
GESRPETPK	GES[79.9663]RPETPK	K	Q	707	715	9	2	3S(79.9663)	sp|Q6KC79-2|NIPBL_HUMAN	Q6KC79-2	NIPBL_HUMAN	NIPBL	Isoform 2 of Nipped-B-like protein		sp|Q6KC79-3|NIPBL_HUMAN, sp|Q6KC79|NIPBL_HUMAN	1	4356573	MS/MS	STY:79.9663@GES(0.5000)RPET(0.5000)PK;
GFEEEHKDSDDDSSDDEQEK	GFEEEHKDS[79.9663]DDDS[79.9663]S[79.9663]DDEQEK	K	K	423	442	20	3	13S(79.9663),14S(79.9663),9S(79.9663)	sp|Q13435|SF3B2_HUMAN	Q13435	SF3B2_HUMAN	SF3B2	Splicing factor 3B subunit 2			14	2.07291232E8	MS/MS	STY:79.9663@GFEEEHKDS(1.0000)DDDS(1.0000)S(1.0000)DDEQEK;
GFGDGYNGYGGGPGGGNFGGSPGYGGGR	GFGDGYNGYGGGPGGGNFGGS[79.9663]PGYGGGR	R	G	239	266	28	3	21S(79.9663)	sp|P22626|ROA2_HUMAN	P22626	ROA2_HUMAN	HNRNPA2B1	Heterogeneous nuclear ribonucleoproteins A2/B1		sp|P22626-2|ROA2_HUMAN	4	5.7539336E7	MS/MS	STY:79.9663@GFGDGY(0.0262)NGY(0.0321)GGGPGGGNFGGS(0.9172)PGY(0.0245)GGGR;
GFGDGYNGYGGGPGGGNFGGSPGYGGGR	GFGDGY[79.9663]NGYGGGPGGGNFGGSPGYGGGR	R	G	239	266	28	2,3	6Y(79.9663)	sp|P22626|ROA2_HUMAN	P22626	ROA2_HUMAN	HNRNPA2B1	Heterogeneous nuclear ribonucleoproteins A2/B1		sp|P22626-2|ROA2_HUMAN	8	5.7539336E7	MS/MS	STY:79.9663@GFGDGY(0.7487)NGY(0.1554)GGGPGGGNFGGS(0.0479)PGY(0.0479)GGGR;
GFGFGQGAGALVHSE	GFGFGQGAGALVHS[79.9663]E	K	-	179	193	15	2	14S(79.9663)	sp|P21291|CSRP1_HUMAN	P21291	CSRP1_HUMAN	CSRP1	Cysteine and glycine-rich protein 1			4	3.5632416E7	MS/MS	STY:79.9663@GFGFGQGAGALVHS(1.0000)E;
GFGSEEGSR	GFGS[79.9663]EEGSR	R	A	39	47	9	2	4S(79.9663)	sp|Q9Y5S9|RBM8A_HUMAN	Q9Y5S9	RBM8A_HUMAN	RBM8A	RNA-binding protein 8A			1	2.33499e+06	MS/MS	STY:79.9663@GFGS(0.5000)EEGS(0.5000)R;
GFINDDDDEDEGEEDEGSDSGDSEDDVGHK	GFINDDDDEDEGEEDEGS[79.9663]DS[79.9663]GDS[79.9663]EDDVGHK	K	K	56	85	30	3	18S(79.9663),20S(79.9663),23S(79.9663)	sp|Q7KZ85-3|SPT6H_HUMAN	Q7KZ85-3	SPT6H_HUMAN	SUPT6H	Isoform 3 of Transcription elongation factor SPT6		sp|Q7KZ85|SPT6H_HUMAN	1	1.1177436E7	MS/MS	STY:79.9663@GFINDDDDEDEGEEDEGS(1.0000)DS(1.0000)GDS(1.0000)EDDVGHK;
GFINDDDDEDEGEEDEGSDSGDSEDDVGHKK	GFINDDDDEDEGEEDEGS[79.9663]DS[79.9663]GDS[79.9663]EDDVGHKK	K	R	56	86	31	3	18S(79.9663),20S(79.9663),23S(79.9663)	sp|Q7KZ85-3|SPT6H_HUMAN	Q7KZ85-3	SPT6H_HUMAN	SUPT6H	Isoform 3 of Transcription elongation factor SPT6		sp|Q7KZ85|SPT6H_HUMAN	3	1.4239526E7	MS/MS	STY:79.9663@GFINDDDDEDEGEEDEGS(1.0000)DS(1.0000)GDS(1.0000)EDDVGHKK;
GFSDSGGGPPAK	GFS[79.9663]DSGGGPPAK	R	Q	64	75	12	2	3S(79.9663)	sp|Q9H307|PININ_HUMAN	Q9H307	PININ_HUMAN	PNN	Pinin			3	5135497	MS/MS	STY:79.9663@GFS(0.9385)DS(0.0615)GGGPPAK;
GGAAGEDEAGGPEGDPEEEDSQAETK	GGAAGEDEAGGPEGDPEEEDS[79.9663]QAETK	R	S	24	49	26	3	21S(79.9663)	sp|O75410-2|TACC1_HUMAN	O75410-2	TACC1_HUMAN	TACC1	Isoform 2 of Transforming acidic coiled-coil-containing protein 1		sp|O75410-10|TACC1_HUMAN, sp|O75410-6|TACC1_HUMAN, sp|O75410-9|TACC1_HUMAN, sp|O75410|TACC1_HUMAN	1	0	MS/MS	STY:79.9663@GGAAGEDEAGGPEGDPEEEDS(0.7876)QAET(0.2124)K;
GGAPDPSPGATATPGAPAQPSSPDAR	GGAPDPSPGATATPGAPAQPS[79.9663]SPDAR	R	R	505	530	26	3	21S(79.9663)	sp|O95365|ZBT7A_HUMAN	O95365	ZBT7A_HUMAN	ZBTB7A	Zinc finger and BTB domain-containing protein 7A			1	0	MS/MS	STY:79.9663@GGAPDPS(0.0355)PGAT(0.0403)AT(0.0403)PGAPAQPS(0.4419)S(0.4419)PDAR;
GGDDHDDTSDSDSDGLTLK	GGDDHDDT[79.9663]S[79.9663]DS[79.9663]DSDGLTLK	K	E	144	162	19	2	11S(79.9663),8T(79.9663),9S(79.9663)	sp|Q9BTC0|DIDO1_HUMAN	Q9BTC0	DIDO1_HUMAN	DIDO1	Death-inducer obliterator 1		sp|Q9BTC0-1|DIDO1_HUMAN, sp|Q9BTC0-2|DIDO1_HUMAN, sp|Q9BTC0-3|DIDO1_HUMAN	2	7143355	MS/MS	STY:79.9663@GGDDHDDT(0.7168)S(0.7168)DS(0.7168)DS(0.7168)DGLT(0.1329)LK;
GGDVSPSPYSSSSWR	GGDVS[79.9663]PSPYSSSSWR	R	R	379	393	15	2	5S(79.9663)	sp|Q14004-2|CDK13_HUMAN	Q14004-2	CDK13_HUMAN	CDK13	Isoform 2 of Cyclin-dependent kinase 13		sp|Q14004|CDK13_HUMAN	1	0	MS/MS	STY:79.9663@GGDVS(0.9364)PS(0.0111)PY(0.0105)S(0.0105)S(0.0105)S(0.0105)S(0.0105)WR;
GGGGDMAEPSEAGDAPPDDGPPGELGPDGPDGPEEK	GGGGDMAEPS[79.9663]EAGDAPPDDGPPGELGPDGPDGPEEK	R	G	302	337	36	3	10S(79.9663)	sp|P08621-2|RU17_HUMAN	P08621-2	RU17_HUMAN	SNRNP70	Isoform 2 of U1 small nuclear ribonucleoprotein 70 kDa		sp|P08621-4|RU17_HUMAN, sp|P08621|RU17_HUMAN	2	1.4502418E7	MS/MS	STY:79.9663@GGGGDMAEPS(1.0000)EAGDAPPDDGPPGELGPDGPDGPEEK;
GGGGDMAEPSEAGDAPPDDGPPGELGPDGPDGPEEK	GGGGDM[15.9949]AEPS[79.9663]EAGDAPPDDGPPGELGPDGPDGPEEK	R	G	302	337	36	3	10S(79.9663),6M(15.9949)	sp|P08621-2|RU17_HUMAN	P08621-2	RU17_HUMAN	SNRNP70	Isoform 2 of U1 small nuclear ribonucleoprotein 70 kDa		sp|P08621-4|RU17_HUMAN, sp|P08621|RU17_HUMAN	1	4.64376e+06	MS/MS	STY:79.9663@GGGGDMAEPS(1.0000)EAGDAPPDDGPPGELGPDGPDGPEEK;M:15.9949@GGGGDM(1.0000)AEPSEAGDAPPDDGPPGELGPDGPDGPEEK;
GGHSSVSTESESSSFHSS	GGHSSVSTESES[79.9663]SSFHSS	R	-	339	356	18	3	12S(79.9663)	sp|P61073-2|CXCR4_HUMAN	P61073-2	CXCR4_HUMAN	CXCR4	Isoform 2 of C-X-C chemokine receptor type 4		sp|P61073|CXCR4_HUMAN	1	1.3022e+06	MS/MS	STY:79.9663@GGHS(0.0177)S(0.0177)VS(0.0177)T(0.0177)ES(0.0177)ES(0.2920)S(0.2920)S(0.2920)FHS(0.0178)S(0.0178);
GGHSSVSTESESSSFHSS	GGHS[79.9663]SVSTESESSSFHSS	R	-	339	356	18	2	4S(79.9663)	sp|P61073-2|CXCR4_HUMAN	P61073-2	CXCR4_HUMAN	CXCR4	Isoform 2 of C-X-C chemokine receptor type 4		sp|P61073|CXCR4_HUMAN	1	3.25247e+06	MS/MS	STY:79.9663@GGHS(0.1232)S(0.1232)VS(0.1232)T(0.1232)ES(0.1232)ES(0.1232)S(0.1232)S(0.1232)FHS(0.0071)S(0.0071);
GGHSSVSTESESSSFHSS	GGHS[79.9663]SVSTES[79.9663]ESSSFHSS	R	-	339	356	18	2	10S(79.9663),4S(79.9663)	sp|P61073-2|CXCR4_HUMAN	P61073-2	CXCR4_HUMAN	CXCR4	Isoform 2 of C-X-C chemokine receptor type 4		sp|P61073|CXCR4_HUMAN	1	0	MS/MS	STY:79.9663@GGHS(0.3428)S(0.3428)VS(0.3428)T(0.3428)ES(0.4544)ES(0.0349)S(0.0349)S(0.0349)FHS(0.0349)S(0.0349);
GGLSPANDTGAK	GGLSPANDT[79.9663]GAK	R	K	44	55	12	2	9T(79.9663)	sp|P30419|NMT1_HUMAN	P30419	NMT1_HUMAN	NMT1	Glycylpeptide N-tetradecanoyltransferase 1			2	1.127109E7	MS/MS	STY:79.9663@GGLS(0.0797)PANDT(0.9203)GAK;
GGNFGFGDSRGGGGNFGPGPGSNFR	GGNFGFGDS[79.9663]RGGGGNFGPGPGSNFR	R	G	204	228	25	3	9S(79.9663)	sp|P22626|ROA2_HUMAN	P22626	ROA2_HUMAN	HNRNPA2B1	Heterogeneous nuclear ribonucleoproteins A2/B1		sp|P22626-2|ROA2_HUMAN	2	7.61334e+06	MS/MS	STY:79.9663@GGNFGFGDS(0.9336)RGGGGNFGPGPGS(0.0664)NFR;
GGNVFAALIQDQSEEEEEEEK	GGNVFAALIQDQS[79.9663]EEEEEEEK	K	H	128	148	21	3	13S(79.9663)	sp|Q8NE71|ABCF1_HUMAN	Q8NE71	ABCF1_HUMAN	ABCF1	ATP-binding cassette sub-family F member 1		sp|Q8NE71-2|ABCF1_HUMAN	1	0	MS/MS	STY:79.9663@GGNVFAALIQDQS(1.0000)EEEEEEEK;
GGNVFAALIQDQSEEEEEEEKHPPK	GGNVFAALIQDQS[79.9663]EEEEEEEKHPPK	K	P	128	152	25	3,4	13S(79.9663)	sp|Q8NE71|ABCF1_HUMAN	Q8NE71	ABCF1_HUMAN	ABCF1	ATP-binding cassette sub-family F member 1		sp|Q8NE71-2|ABCF1_HUMAN	2	9606574	MS/MS	STY:79.9663@GGNVFAALIQDQS(1.0000)EEEEEEEKHPPK;
GGSISVQVNSIKFDSE	GGSISVQVNSIKFDS[79.9663]E	R	-	694	709	16	2	15S(79.9663)	sp|Q14978-2|NOLC1_HUMAN	Q14978-2	NOLC1_HUMAN	NOLC1	Isoform Beta of Nucleolar and coiled-body phosphoprotein 1		sp|Q14978-3|NOLC1_HUMAN, sp|Q14978|NOLC1_HUMAN	8	7.0612592E7	MS/MS	STY:79.9663@GGS(0.0223)IS(0.0223)VQVNS(0.0200)IKFDS(0.9355)E;
GGSISVQVNSIKFDSE	GGSIS[79.9663]VQVNSIKFDSE	R	-	694	709	16	2	5S(79.9663)	sp|Q14978-2|NOLC1_HUMAN	Q14978-2	NOLC1_HUMAN	NOLC1	Isoform Beta of Nucleolar and coiled-body phosphoprotein 1		sp|Q14978-3|NOLC1_HUMAN, sp|Q14978|NOLC1_HUMAN	1	0	MS/MS	STY:79.9663@GGS(0.0240)IS(0.8382)VQVNS(0.0245)IKFDS(0.1133)E;
GGSPDLWK	GGS[79.9663]PDLWK	R	S	474	481	8	2	3S(79.9663)	sp|Q96JM3|CHAP1_HUMAN	Q96JM3	CHAP1_HUMAN	CHAMP1	Chromosome alignment-maintaining phosphoprotein 1			1	1.38039e+06	MS/MS	STY:79.9663@GGS(1.0000)PDLWK;
GGVTGSPEASISGSK	GGVTGSPEAS[79.9663]ISGSK	K	G	5726	5740	15	2	10S(79.9663)	sp|Q09666|AHNK_HUMAN	Q09666	AHNK_HUMAN	AHNAK	Neuroblast differentiation-associated protein AHNAK			1	3.634308E7	MS/MS	STY:79.9663@GGVT(0.0248)GS(0.0803)PEAS(0.5789)IS(0.0099)GS(0.3061)K;
GGVTGSPEASISGSK	GGVTGS[79.9663]PEASISGSK	K	G	5726	5740	15	2	6S(79.9663)	sp|Q09666|AHNK_HUMAN	Q09666	AHNK_HUMAN	AHNAK	Neuroblast differentiation-associated protein AHNAK			1	3.634308E7	MS/MS	STY:79.9663@GGVT(0.0150)GS(0.9328)PEAS(0.0157)IS(0.0182)GS(0.0182)K;
GGVTGSPEASISGSK	GGVT[79.9663]GSPEASISGSK	K	G	5726	5740	15	2	4T(79.9663)	sp|Q09666|AHNK_HUMAN	Q09666	AHNK_HUMAN	AHNAK	Neuroblast differentiation-associated protein AHNAK			2	0	MS/MS	STY:79.9663@GGVT(0.4621)GS(0.4621)PEAS(0.0253)IS(0.0253)GS(0.0253)K;
GHHVTDSENDEPLNLNASDSESEELHR	GHHVT[79.9663]DS[79.9663]ENDEPLNLNAS[79.9663]DSESEELHR	K	Q	63	89	27	3	18S(79.9663),5T(79.9663),7S(79.9663)	sp|Q96ST2|IWS1_HUMAN	Q96ST2	IWS1_HUMAN	IWS1	Protein IWS1 homolog			1	0	MS/MS	STY:79.9663@GHHVT(0.5979)DS(0.5979)ENDEPLNLNAS(0.6239)DS(0.5901)ES(0.5901)EELHR;
GHLSRPEAQSLSPYTTSANR	GHLSRPEAQSLS[79.9663]PYTTSANR	R	A	251	270	20	3	12S(79.9663)	sp|O94776-2|MTA2_HUMAN	O94776-2	MTA2_HUMAN	MTA2	Isoform 2 of Metastasis-associated protein MTA2		sp|O94776|MTA2_HUMAN	1	0	MS/MS	STY:79.9663@GHLS(0.0080)RPEAQS(0.0298)LS(0.3146)PY(0.3146)T(0.3146)T(0.0093)S(0.0093)ANR;
GHLSRPEAQSLSPYTTSANR	GHLSRPEAQS[79.9663]LSPYTTSANR	R	A	251	270	20	3	10S(79.9663)	sp|O94776-2|MTA2_HUMAN	O94776-2	MTA2_HUMAN	MTA2	Isoform 2 of Metastasis-associated protein MTA2		sp|O94776|MTA2_HUMAN	1	5.31318e+06	MS/MS	STY:79.9663@GHLS(0.0202)RPEAQS(0.2858)LS(0.2858)PY(0.2858)T(0.0409)T(0.0409)S(0.0409)ANR;
GHTASESDEQQWPEEK	GHTAS[79.9663]ESDEQQWPEEK	R	R	1253	1268	16	2	5S(79.9663)	sp|Q9NTI5-2|PDS5B_HUMAN	Q9NTI5-2	PDS5B_HUMAN	PDS5B	Isoform 2 of Sister chromatid cohesion protein PDS5 homolog B		sp|Q9NTI5-5|PDS5B_HUMAN, sp|Q9NTI5|PDS5B_HUMAN	1	0	MS/MS	STY:79.9663@GHT(0.0505)AS(0.4747)ES(0.4747)DEQQWPEEK;
GHTDTEGRPPSPPPTSTPEK	GHTDTEGRPPSPPPT[79.9663]ST[79.9663]PEK	R	C	353	372	20	3	15T(79.9663),17T(79.9663)	sp|Q00613|HSF1_HUMAN	Q00613	HSF1_HUMAN	HSF1	Heat shock factor protein 1		sp|Q00613-2|HSF1_HUMAN	1	1.331859E7	MS/MS	STY:79.9663@GHT(0.0993)DT(0.0993)EGRPPS(0.0993)PPPT(0.5383)S(0.5383)T(0.6255)PEK;
GHTDTEGRPPSPPPTSTPEK	GHTDT[79.9663]EGRPPSPPPTSTPEK	R	C	353	372	20	3	5T(79.9663)	sp|Q00613|HSF1_HUMAN	Q00613	HSF1_HUMAN	HSF1	Heat shock factor protein 1		sp|Q00613-2|HSF1_HUMAN	1	3.15874e+06	MS/MS	STY:79.9663@GHT(0.0107)DT(0.1979)EGRPPS(0.1979)PPPT(0.1979)S(0.1979)T(0.1979)PEK;
GHTDTEGRPPSPPPTSTPEK	GHTDT[79.9663]EGRPPSPPPT[79.9663]STPEK	R	C	353	372	20	3	15T(79.9663),5T(79.9663)	sp|Q00613|HSF1_HUMAN	Q00613	HSF1_HUMAN	HSF1	Heat shock factor protein 1		sp|Q00613-2|HSF1_HUMAN	1	1.3291142E7	MS/MS	STY:79.9663@GHT(0.0212)DT(0.5162)EGRPPS(0.1239)PPPT(0.4462)S(0.4462)T(0.4462)PEK;
GHTDTEGRPPSPPPTSTPEK	GHTDT[79.9663]EGRPPS[79.9663]PPPTSTPEK	R	C	353	372	20	3	11S(79.9663),5T(79.9663)	sp|Q00613|HSF1_HUMAN	Q00613	HSF1_HUMAN	HSF1	Heat shock factor protein 1		sp|Q00613-2|HSF1_HUMAN	1	1.331859E7	MS/MS	STY:79.9663@GHT(0.0283)DT(0.3943)EGRPPS(0.3943)PPPT(0.3943)S(0.3943)T(0.3943)PEK;
GHTDTEGRPPSPPPTSTPEK	GHT[79.9663]DT[79.9663]EGRPPSPPPTSTPEK	R	C	353	372	20	3	3T(79.9663),5T(79.9663)	sp|Q00613|HSF1_HUMAN	Q00613	HSF1_HUMAN	HSF1	Heat shock factor protein 1		sp|Q00613-2|HSF1_HUMAN	1	0	MS/MS	STY:79.9663@GHT(0.3333)DT(0.3333)EGRPPS(0.3333)PPPT(0.3333)S(0.3333)T(0.3333)PEK;
GHYEVTGSDDETGK	GHYEVT[79.9663]GSDDETGK	K	L	5834	5847	14	2,3	6T(79.9663)	sp|Q09666|AHNK_HUMAN	Q09666	AHNK_HUMAN	AHNAK	Neuroblast differentiation-associated protein AHNAK			5	6.2247048E7	MS/MS	STY:79.9663@GHY(0.0094)EVT(0.3302)GS(0.3302)DDET(0.3302)GK;
GHYEVTGSDDETGK	GHY[79.9663]EVTGSDDETGK	K	L	5834	5847	14	2,3	3Y(79.9663)	sp|Q09666|AHNK_HUMAN	Q09666	AHNK_HUMAN	AHNAK	Neuroblast differentiation-associated protein AHNAK			5	6.2247048E7	MS/MS	STY:79.9663@GHY(0.8972)EVT(0.0404)GS(0.0404)DDET(0.0220)GK;
GIPLATGDTSPEPELLPGAPLPPPK	GIPLAT[79.9663]GDTSPEPELLPGAPLPPPK	K	E	33	57	25	3	6T(79.9663)	sp|O75821|EIF3G_HUMAN	O75821	EIF3G_HUMAN	EIF3G	Eukaryotic translation initiation factor 3 subunit G			3	1.8122502E7	MS/MS	STY:79.9663@GIPLAT(0.5857)GDT(0.3071)S(0.1072)PEPELLPGAPLPPPK;
GISSSNEGVEEPSK	GIS[79.9663]SSNEGVEEPSK	R	K	129	142	14	2	3S(79.9663)	sp|Q9NXV6|CARF_HUMAN	Q9NXV6	CARF_HUMAN	CDKN2AIP	CDKN2A-interacting protein			1	0	MS/MS	STY:79.9663@GIS(0.4053)S(0.4053)S(0.1676)NEGVEEPS(0.0219)K;
GKASPFEEDQNR	GKAS[79.9663]PFEEDQNR	K	D	133	144	12	2	4S(79.9663)	sp|Q8TB72-2|PUM2_HUMAN	Q8TB72-2	PUM2_HUMAN	PUM2	Isoform 2 of Pumilio homolog 2		sp|Q8TB72-3|PUM2_HUMAN, sp|Q8TB72-4|PUM2_HUMAN, sp|Q8TB72|PUM2_HUMAN	1	3762238	MS/MS	STY:79.9663@GKAS(1.0000)PFEEDQNR;
GKGSPRPQAPK	GKGS[79.9663]PRPQAPK	K	A	545	555	11	2,3	4S(79.9663)	sp|Q14978-2|NOLC1_HUMAN	Q14978-2	NOLC1_HUMAN	NOLC1	Isoform Beta of Nucleolar and coiled-body phosphoprotein 1		sp|Q14978-3|NOLC1_HUMAN, sp|Q14978|NOLC1_HUMAN	2	1.6970002E7	MS/MS	STY:79.9663@GKGS(1.0000)PRPQAPK;
GKLPESPK	GKLPES[79.9663]PK	R	R	442	449	8	2	6S(79.9663)	sp|P17480-2|UBF1_HUMAN	P17480-2	UBF1_HUMAN	UBTF	Isoform UBF2 of Nucleolar transcription factor 1		sp|P17480|UBF1_HUMAN	1	2.77707e+06	MS/MS	STY:79.9663@GKLPES(1.0000)PK;
GKLSAEENPDDSEVPSSSGINSTK	GKLSAEENPDDS[79.9663]EVPSSSGINSTK	K	S	40	63	24	3	12S(79.9663)	sp|Q9Y5Q9-2|TF3C3_HUMAN	Q9Y5Q9-2	TF3C3_HUMAN	GTF3C3	Isoform 2 of General transcription factor 3C polypeptide 3		sp|Q9Y5Q9|TF3C3_HUMAN	1	9722996	MS/MS	STY:79.9663@GKLS(0.0325)AEENPDDS(0.9160)EVPS(0.0103)S(0.0103)S(0.0103)GINS(0.0103)T(0.0103)K;
GKTPEEIRK	GKT[79.9663]PEEIRK	K	T	129	137	9	2	3T(79.9663)	sp|P63208-2|SKP1_HUMAN	P63208-2	SKP1_HUMAN	SKP1	Isoform 2 of S-phase kinase-associated protein 1		sp|P63208|SKP1_HUMAN	1	1.38518e+06	MS/MS	STY:79.9663@GKT(1.0000)PEEIRK;
GLAAEDSGGDSK	GLAAEDS[79.9663]GGDSK	K	D	184	195	12	2	7S(79.9663)	sp|P41227-2|NAA10_HUMAN	P41227-2	NAA10_HUMAN	NAA10	Isoform 2 of N-alpha-acetyltransferase 10		sp|P41227|NAA10_HUMAN	1	0	MS/MS	STY:79.9663@GLAAEDS(0.5000)GGDS(0.5000)K;
GLAEVQQDGEAEEGATSDGEK	GLAEVQQDGEAEEGAT[79.9663]SDGEK	K	K	484	504	21	2	16T(79.9663)	sp|Q02952-2|AKA12_HUMAN	Q02952-2	AKA12_HUMAN	AKAP12	Isoform 2 of A-kinase anchor protein 12		sp|Q02952-3|AKA12_HUMAN, sp|Q02952|AKA12_HUMAN	1	1.4015441E7	MS/MS	STY:79.9663@GLAEVQQDGEAEEGAT(0.5000)S(0.5000)DGEK;
GLAGPPASPGK	GLAGPPAS[79.9663]PGK	K	A	597	607	11	2	8S(79.9663)	sp|Q9P206-2|K1522_HUMAN	Q9P206-2	K1522_HUMAN	KIAA1522	Isoform 2 of Uncharacterized protein KIAA1522		sp|Q9P206-3|K1522_HUMAN, sp|Q9P206|K1522_HUMAN	1	1.75946e+06	MS/MS	STY:79.9663@GLAGPPAS(1.0000)PGK;
GLGPPSPPAPPR	GLGPPS[79.9663]PPAPPR	R	G	90	101	12	2	6S(79.9663)	sp|Q13425-2|SNTB2_HUMAN	Q13425-2	SNTB2_HUMAN	SNTB2	Isoform 2 of Beta-2-syntrophin		sp|Q13425|SNTB2_HUMAN	3	7727938	MS/MS	STY:79.9663@GLGPPS(1.0000)PPAPPR;
GLLAQGLRPESPPPAGPLLNGAPAGESPQPK	GLLAQGLRPESPPPAGPLLNGAPAGES[79.9663]PQPK	R	A	642	672	31	3	27S(79.9663)	sp|Q96TA1-2|NIBA2_HUMAN	Q96TA1-2	NIBA2_HUMAN	NIBAN2	Isoform 2 of Protein Niban 2		sp|Q96TA1|NIBA2_HUMAN	3	0	MS/MS	STY:79.9663@GLLAQGLRPES(0.2050)PPPAGPLLNGAPAGES(0.7950)PQPK;
GLLAQGLRPESPPPAGPLLNGAPAGESPQPK	GLLAQGLRPES[79.9663]PPPAGPLLNGAPAGESPQPK	R	A	642	672	31	3	11S(79.9663)	sp|Q96TA1-2|NIBA2_HUMAN	Q96TA1-2	NIBA2_HUMAN	NIBAN2	Isoform 2 of Protein Niban 2		sp|Q96TA1|NIBA2_HUMAN	21	2.03944352E8	MS/MS	STY:79.9663@GLLAQGLRPES(0.9421)PPPAGPLLNGAPAGES(0.0579)PQPK;
GLLAQGLRPESPPPAGPLLNGAPAGESPQPK	GLLAQGLRPES[79.9663]PPPAGPLLNGAPAGES[79.9663]PQPK	R	A	642	672	31	3	11S(79.9663),27S(79.9663)	sp|Q96TA1-2|NIBA2_HUMAN	Q96TA1-2	NIBA2_HUMAN	NIBAN2	Isoform 2 of Protein Niban 2		sp|Q96TA1|NIBA2_HUMAN	14	1.1955452E8	MS/MS	STY:79.9663@GLLAQGLRPES(1.0000)PPPAGPLLNGAPAGES(1.0000)PQPK;
GLLSDSMTDVPVDTGVAAR	GLLS[79.9663]DSMTDVPVDTGVAAR	K	T	16	34	19	2	4S(79.9663)	sp|O43399-2|TPD54_HUMAN	O43399-2	TPD54_HUMAN	TPD52L2	Isoform 2 of Tumor protein D54		sp|O43399-3|TPD54_HUMAN, sp|O43399-4|TPD54_HUMAN, sp|O43399-5|TPD54_HUMAN, sp|O43399-7|TPD54_HUMAN, sp|O43399|TPD54_HUMAN	1	0	MS/MS	STY:79.9663@GLLS(0.8820)DS(0.0639)MT(0.0283)DVPVDT(0.0258)GVAAR;
GLLSNHTGSPRSPSTTYLHTPTPSEDAAIPSK	GLLS[79.9663]NHTGSPRSPSTTYLHTPTPSEDAAIPSK	R	S	764	795	32	4	4S(79.9663)	sp|Q13111|CAF1A_HUMAN	Q13111	CAF1A_HUMAN	CHAF1A	Chromatin assembly factor 1 subunit A			1	1.97205e+06	MS/MS	STY:79.9663@GLLS(0.3008)NHT(0.3008)GS(0.3008)PRS(0.0239)PS(0.0239)T(0.0075)T(0.0075)Y(0.0075)LHT(0.0075)PT(0.0075)PS(0.0075)EDAAIPS(0.0049)K;
GLLSNHTGSPRSPSTTYLHTPTPSEDAAIPSK	GLLS[79.9663]NHT[79.9663]GSPRSPSTTYLHTPTPSEDAAIPSK	R	S	764	795	32	4	4S(79.9663),7T(79.9663)	sp|Q13111|CAF1A_HUMAN	Q13111	CAF1A_HUMAN	CHAF1A	Chromatin assembly factor 1 subunit A			1	3722902	MS/MS	STY:79.9663@GLLS(0.1794)NHT(0.1794)GS(0.1794)PRS(0.1794)PS(0.1794)T(0.1794)T(0.1794)Y(0.1794)LHT(0.1794)PT(0.1794)PS(0.1794)EDAAIPS(0.0261)K;
GLLYDSDEEDEERPAR	GLLYDS[79.9663]DEEDEERPAR	R	K	134	149	16	2,3	6S(79.9663)	sp|P49736|MCM2_HUMAN	P49736	MCM2_HUMAN	MCM2	DNA replication licensing factor MCM2			5	1.2446808E8	MS/MS	STY:79.9663@GLLY(0.0589)DS(0.9411)DEEDEERPAR;
GLLYDSDEEDEERPAR	GLLY[79.9663]DSDEEDEERPAR	R	K	134	149	16	2	4Y(79.9663)	sp|P49736|MCM2_HUMAN	P49736	MCM2_HUMAN	MCM2	DNA replication licensing factor MCM2			2	1.0860936E8	MS/MS	STY:79.9663@GLLY(0.5000)DS(0.5000)DEEDEERPAR;
GLMAGGRPEGQYSEDEDTDTDEYK	GLMAGGRPEGQYSEDEDTDT[79.9663]DEY[79.9663]K	R	E	418	441	24	3	20T(79.9663),23Y(79.9663)	sp|Q9NPQ8-2|RIC8A_HUMAN	Q9NPQ8-2	RIC8A_HUMAN	RIC8A	Isoform 2 of Synembryn-A		sp|Q9NPQ8-3|RIC8A_HUMAN, sp|Q9NPQ8-4|RIC8A_HUMAN, sp|Q9NPQ8|RIC8A_HUMAN	1	1.0848838E7	MS/MS	STY:79.9663@GLMAGGRPEGQY(0.1776)S(0.1776)EDEDT(0.0822)DT(0.7813)DEY(0.7813)K;
GLMAGGRPEGQYSEDEDTDTDEYK	GLMAGGRPEGQY[79.9663]SEDEDTDTDEYK	R	E	418	441	24	3	12Y(79.9663)	sp|Q9NPQ8-2|RIC8A_HUMAN	Q9NPQ8-2	RIC8A_HUMAN	RIC8A	Isoform 2 of Synembryn-A		sp|Q9NPQ8-3|RIC8A_HUMAN, sp|Q9NPQ8-4|RIC8A_HUMAN, sp|Q9NPQ8|RIC8A_HUMAN	1	0	MS/MS	STY:79.9663@GLMAGGRPEGQY(0.2000)S(0.2000)EDEDT(0.2000)DT(0.2000)DEY(0.2000)K;
GLMAGGRPEGQYSEDEDTDTDEYK	GLMAGGRPEGQY[79.9663]S[79.9663]EDEDTDTDEYK	R	E	418	441	24	3	12Y(79.9663),13S(79.9663)	sp|Q9NPQ8-2|RIC8A_HUMAN	Q9NPQ8-2	RIC8A_HUMAN	RIC8A	Isoform 2 of Synembryn-A		sp|Q9NPQ8-3|RIC8A_HUMAN, sp|Q9NPQ8-4|RIC8A_HUMAN, sp|Q9NPQ8|RIC8A_HUMAN	3	1.0848838E7	MS/MS	STY:79.9663@GLMAGGRPEGQY(0.8624)S(0.8624)EDEDT(0.0978)DT(0.0978)DEY(0.0795)K;
GLMAGGRPEGQYSEDEDTDTDEYK	GLM[15.9949]AGGRPEGQYS[79.9663]EDEDT[79.9663]DTDEYK	R	E	418	441	24	3	13S(79.9663),18T(79.9663),3M(15.9949)	sp|Q9NPQ8-2|RIC8A_HUMAN	Q9NPQ8-2	RIC8A_HUMAN	RIC8A	Isoform 2 of Synembryn-A		sp|Q9NPQ8-3|RIC8A_HUMAN, sp|Q9NPQ8-4|RIC8A_HUMAN, sp|Q9NPQ8|RIC8A_HUMAN	1	3027893	MS/MS	STY:79.9663@GLMAGGRPEGQY(0.1203)S(0.5115)EDEDT(0.4561)DT(0.4561)DEY(0.4561)K;M:15.9949@GLM(1.0000)AGGRPEGQYSEDEDTDTDEYK;
GLMAGGRPEGQYSEDEDTDTDEYK	GLM[15.9949]AGGRPEGQY[79.9663]S[79.9663]EDEDTDTDEYK	R	E	418	441	24	3	12Y(79.9663),13S(79.9663),3M(15.9949)	sp|Q9NPQ8-2|RIC8A_HUMAN	Q9NPQ8-2	RIC8A_HUMAN	RIC8A	Isoform 2 of Synembryn-A		sp|Q9NPQ8-3|RIC8A_HUMAN, sp|Q9NPQ8-4|RIC8A_HUMAN, sp|Q9NPQ8|RIC8A_HUMAN	1	6609897	MS/MS	STY:79.9663@GLMAGGRPEGQY(0.4016)S(0.4016)EDEDT(0.3990)DT(0.3990)DEY(0.3990)K;M:15.9949@GLM(1.0000)AGGRPEGQYSEDEDTDTDEYK;
GLNPDGTPALSTLGGFSPASKPSSPR	GLNPDGTPALSTLGGFS[79.9663]PAS[79.9663]KPSSPR	K	E	319	344	26	3	17S(79.9663),20S(79.9663)	sp|Q9UK58-6|CCNL1_HUMAN	Q9UK58-6	CCNL1_HUMAN	CCNL1	Isoform 4 of Cyclin-L1		sp|Q9UK58|CCNL1_HUMAN	1	1.5752687E7	MS/MS	STY:79.9663@GLNPDGT(0.0180)PALS(0.0292)T(0.0292)LGGFS(0.5548)PAS(0.4562)KPS(0.4562)S(0.4562)PR;
GLNPDGTPALSTLGGFSPASKPSSPR	GLNPDGTPALS[79.9663]TLGGFSPAS[79.9663]KPSSPR	K	E	319	344	26	3	11S(79.9663),20S(79.9663)	sp|Q9UK58-6|CCNL1_HUMAN	Q9UK58-6	CCNL1_HUMAN	CCNL1	Isoform 4 of Cyclin-L1		sp|Q9UK58|CCNL1_HUMAN	1	1.1246237E7	MS/MS	STY:79.9663@GLNPDGT(0.0337)PALS(0.4609)T(0.4609)LGGFS(0.4609)PAS(0.5120)KPS(0.0358)S(0.0358)PR;
GLNPDGTPALSTLGGFSPASKPSSPR	GLNPDGT[79.9663]PALS[79.9663]TLGGFSPASKPSSPR	K	E	319	344	26	3	11S(79.9663),7T(79.9663)	sp|Q9UK58-6|CCNL1_HUMAN	Q9UK58-6	CCNL1_HUMAN	CCNL1	Isoform 4 of Cyclin-L1		sp|Q9UK58|CCNL1_HUMAN	1	1.5752687E7	MS/MS	STY:79.9663@GLNPDGT(0.3874)PALS(0.3874)T(0.3874)LGGFS(0.3874)PAS(0.3874)KPS(0.0316)S(0.0316)PR;
GLNVIGASDQSPLQSPSNLR	GLNVIGAS[79.9663]DQSPLQSPS[79.9663]NLR	K	D	981	1000	20	3	17S(79.9663),8S(79.9663)	sp|Q9HAU0-2|PKHA5_HUMAN	Q9HAU0-2	PKHA5_HUMAN	PLEKHA5	Isoform 2 of Pleckstrin homology domain-containing family A member 5		sp|Q9HAU0-4|PKHA5_HUMAN, sp|Q9HAU0-5|PKHA5_HUMAN, sp|Q9HAU0-6|PKHA5_HUMAN, sp|Q9HAU0-8|PKHA5_HUMAN, sp|Q9HAU0|PKHA5_HUMAN	1	952644	MS/MS	STY:79.9663@GLNVIGAS(0.4896)DQS(0.4896)PLQS(0.4896)PS(0.5312)NLR;
GLRDSHSSEEDEASSQTDLSQTISK	GLRDSHS[79.9663]S[79.9663]EEDEASSQTDLSQTISK	R	K	150	174	25	3	7S(79.9663),8S(79.9663)	sp|Q5JTV8-2|TOIP1_HUMAN	Q5JTV8-2	TOIP1_HUMAN	TOR1AIP1	Isoform 2 of Torsin-1A-interacting protein 1		sp|Q5JTV8-3|TOIP1_HUMAN, sp|Q5JTV8-4|TOIP1_HUMAN, sp|Q5JTV8|TOIP1_HUMAN	2	2.395936E7	MS/MS	STY:79.9663@GLRDS(0.0139)HS(0.6828)S(0.6828)EEDEAS(0.2914)S(0.0670)QT(0.0670)DLS(0.0731)QT(0.0731)IS(0.0490)K;
GLRDSHSSEEDEASSQTDLSQTISK	GLRDS[79.9663]HSSEEDEAS[79.9663]S[79.9663]QTDLSQTISK	R	K	150	174	25	3	14S(79.9663),15S(79.9663),5S(79.9663)	sp|Q5JTV8-2|TOIP1_HUMAN	Q5JTV8-2	TOIP1_HUMAN	TOR1AIP1	Isoform 2 of Torsin-1A-interacting protein 1		sp|Q5JTV8-3|TOIP1_HUMAN, sp|Q5JTV8-4|TOIP1_HUMAN, sp|Q5JTV8|TOIP1_HUMAN	1	0	MS/MS	STY:79.9663@GLRDS(0.5428)HS(0.5428)S(0.5428)EEDEAS(0.6305)S(0.6305)QT(0.0276)DLS(0.0276)QT(0.0276)IS(0.0276)K;
GLRDSHSSEEDEASSQTDLSQTISK	GLRDS[79.9663]HS[79.9663]SEEDEASSQTDLSQTISK	R	K	150	174	25	3	5S(79.9663),7S(79.9663)	sp|Q5JTV8-2|TOIP1_HUMAN	Q5JTV8-2	TOIP1_HUMAN	TOR1AIP1	Isoform 2 of Torsin-1A-interacting protein 1		sp|Q5JTV8-3|TOIP1_HUMAN, sp|Q5JTV8-4|TOIP1_HUMAN, sp|Q5JTV8|TOIP1_HUMAN	1	2.395936E7	MS/MS	STY:79.9663@GLRDS(0.8362)HS(0.8613)S(0.1361)EEDEAS(0.0233)S(0.0233)QT(0.0233)DLS(0.0322)QT(0.0322)IS(0.0322)K;
GLSASLPDLDSENWIEVK	GLS[79.9663]ASLPDLDSENWIEVK	K	K	544	561	18	2	3S(79.9663)	sp|Q6PKG0|LARP1_HUMAN	Q6PKG0	LARP1_HUMAN	LARP1	La-related protein 1		sp|Q6PKG0-3|LARP1_HUMAN	1	0	MS/MS	STY:79.9663@GLS(0.4786)AS(0.4786)LPDLDS(0.0428)ENWIEVK;
GLVAAYSGESDSEEEQER	GLVAAYS[79.9663]GESDS[79.9663]EEEQER	R	G	726	743	18	2	12S(79.9663),7S(79.9663)	sp|P98175-2|RBM10_HUMAN	P98175-2	RBM10_HUMAN	RBM10	Isoform 2 of RNA-binding protein 10		sp|P98175-3|RBM10_HUMAN, sp|P98175-4|RBM10_HUMAN, sp|P98175-5|RBM10_HUMAN, sp|P98175|RBM10_HUMAN	1	1.6706282E7	MS/MS	STY:79.9663@GLVAAY(0.3290)S(0.7769)GES(0.1100)DS(0.7841)EEEQER;
GLVAAYSGESDSEEEQERGGPEREEK	GLVAAYS[79.9663]GES[79.9663]DSEEEQERGGPEREEK	R	L	726	751	26	3	10S(79.9663),7S(79.9663)	sp|P98175-2|RBM10_HUMAN	P98175-2	RBM10_HUMAN	RBM10	Isoform 2 of RNA-binding protein 10		sp|P98175-3|RBM10_HUMAN, sp|P98175-4|RBM10_HUMAN, sp|P98175-5|RBM10_HUMAN, sp|P98175|RBM10_HUMAN	1	1.6961648E7	MS/MS	STY:79.9663@GLVAAY(0.2262)S(0.6220)GES(0.5759)DS(0.5759)EEEQERGGPEREEK;
GLVAAYSGDSDNEEELVERLESEEEK	GLVAAY[79.9663]SGDSDNEEELVERLESEEEK	R	L	615	640	26	3	6Y(79.9663)	sp|P52756|RBM5_HUMAN	P52756	RBM5_HUMAN	RBM5	RNA-binding protein 5			1	0	MS/MS	STY:79.9663@GLVAAY(0.3141)S(0.3141)GDS(0.3141)DNEEELVERLES(0.0576)EEEK;
GLVAAYSGESDSEEEQER	GLVAAY[79.9663]SGESDS[79.9663]EEEQER	R	G	726	743	18	2	12S(79.9663),6Y(79.9663)	sp|P98175-2|RBM10_HUMAN	P98175-2	RBM10_HUMAN	RBM10	Isoform 2 of RNA-binding protein 10		sp|P98175-3|RBM10_HUMAN, sp|P98175-4|RBM10_HUMAN, sp|P98175-5|RBM10_HUMAN, sp|P98175|RBM10_HUMAN	2	1.6706282E7	MS/MS	STY:79.9663@GLVAAY(0.9122)S(0.0879)GES(0.0879)DS(0.9120)EEEQER;
GLVAAYSGESDSEEEQER	GLVAAY[79.9663]S[79.9663]GES[79.9663]DSEEEQER	R	G	726	743	18	2	10S(79.9663),6Y(79.9663),7S(79.9663)	sp|P98175-2|RBM10_HUMAN	P98175-2	RBM10_HUMAN	RBM10	Isoform 2 of RNA-binding protein 10		sp|P98175-3|RBM10_HUMAN, sp|P98175-4|RBM10_HUMAN, sp|P98175-5|RBM10_HUMAN, sp|P98175|RBM10_HUMAN	1	4687888	MS/MS	STY:79.9663@GLVAAY(0.7500)S(0.7500)GES(0.7500)DS(0.7500)EEEQER;
GNAEGSSDEEGK	GNAEGS[79.9663]S[79.9663]DEEGK	K	L	127	138	12	2	6S(79.9663),7S(79.9663)	sp|P51858|HDGF_HUMAN	P51858	HDGF_HUMAN	HDGF	Hepatoma-derived growth factor		sp|P51858-2|HDGF_HUMAN, sp|P51858-3|HDGF_HUMAN	1	4.024796E7	MS/MS	STY:79.9663@GNAEGS(1.0000)S(1.0000)DEEGK;
GNAEGSSDEEGKLVIDEPAK	GNAEGS[79.9663]S[79.9663]DEEGKLVIDEPAK	K	E	127	146	20	2,3	6S(79.9663),7S(79.9663)	sp|P51858|HDGF_HUMAN	P51858	HDGF_HUMAN	HDGF	Hepatoma-derived growth factor		sp|P51858-2|HDGF_HUMAN, sp|P51858-3|HDGF_HUMAN	5	1.1837176E7	MS/MS	STY:79.9663@GNAEGS(1.0000)S(1.0000)DEEGKLVIDEPAK;
[truncated: 3,479 more rows]

## Sheet: 10000cells_2_MSFragger
Peptide Sequence	Modified Sequence	Prev AA	Next AA	Start	End	Peptide Length	Charges	Assigned Modifications	Protein	Protein ID	Entry Name	Gene	Protein Description	Mapped Genes	Mapped Proteins	cell4_3 Spectral Count	cell4_3 Intensity	cell4_3 Match Type	cell4_3 Localization
[truncated: 4,669 more rows]

[truncated: 6 more sheets: 10000cells_3_MSFragger, 10000cells_1_PD, 10000cells_2_PD, 10000cells_3_PD, phosphoprotein, phosphosite]
