# Supplementary material for: Unlocking Ultrasensitive Phosphoproteomics of Nanoscale Samples: A Rapid IMAC Enrichment Platform Using Ti-PAN Tip
Source: Research Square preprint supplement (doi:10.21203/rs.3.rs-8623740/v1), 2026-01-28
Supplement: Supplementary file 12 [file f59ccdc4d708ae4b53b850ec.xlsx]

## Sheet: TiO2_1_MSFragger
Peptide Sequence	Modified Sequence	Prev AA	Next AA	Start	End	Peptide Length	Charges	Assigned Modifications	Protein	Protein ID	Entry Name	Gene	Protein Description	Mapped Genes	Mapped Proteins	TiO2_3 Spectral Count	TiO2_3 Intensity	TiO2_3 Match Type	TiO2_3 Localization
AAAAAPASEDEDDEDDEDDEDDDDDEEDDSEEEAMETTPAK	AAAAAPAS[79.9663]EDEDDEDDEDDEDDDDDEEDDSEEEAMET[79.9663]TPAK	K	G	177	217	41	4	37T(79.9663),8S(79.9663)	sp|P19338|NUCL_HUMAN	P19338	NUCL_HUMAN	NCL	Nucleolin			1	0	MS/MS	STY:79.9663@AAAAAPAS(0.5319)EDEDDEDDEDDEDDDDDEEDDS(0.4546)EEEAMET(0.5068)T(0.5068)PAK;
AADPPAENSSAPEAEQGGAE	AADPPAENSS[79.9663]APEAEQGGAE	K	-	305	324	20	2	10S(79.9663)	sp|P67809|YBOX1_HUMAN	P67809	YBOX1_HUMAN	YBX1	Y-box-binding protein 1			1	3901397	MS/MS	STY:79.9663@AADPPAENS(0.0833)S(0.9167)APEAEQGGAE;
AADPPAENSSAPEAEQGGAE	AADPPAENS[79.9663]SAPEAEQGGAE	K	-	305	324	20	2	9S(79.9663)	sp|P67809|YBOX1_HUMAN	P67809	YBOX1_HUMAN	YBX1	Y-box-binding protein 1			4	3901397	MS/MS	STY:79.9663@AADPPAENS(0.5000)S(0.5000)APEAEQGGAE;
AADSDDGAVSAPAASDGGVSK	AADS[79.9663]DDGAVSAPAASDGGVSK	M	S	2	22	21	2	4S(79.9663)	sp|Q96GM8|TOE1_HUMAN	Q96GM8	TOE1_HUMAN	TOE1	Target of EGR1 protein 1			3	0	MS/MS	STY:79.9663@AADS(0.9464)DDGAVS(0.0180)APAAS(0.0178)DGGVS(0.0178)K;
AAEEQGDDQDSEK	AAEEQGDDQDS[79.9663]EK	K	S	175	187	13	2	11S(79.9663)	sp|Q1KMD3|HNRL2_HUMAN	Q1KMD3	HNRL2_HUMAN	HNRNPUL2	Heterogeneous nuclear ribonucleoprotein U-like protein 2			2	0	MS/MS	STY:79.9663@AAEEQGDDQDS(1.0000)EK;
AAESLTAIPEPASPQLLETPIHASQIQK	AAESLTAIPEPAS[79.9663]PQLLETPIHASQIQK	R	V	1763	1790	28	3	13S(79.9663)	sp|Q14676|MDC1_HUMAN	Q14676	MDC1_HUMAN	MDC1	Mediator of DNA damage checkpoint protein 1			1	0	MS/MS	STY:79.9663@AAES(0.0171)LT(0.0171)AIPEPAS(0.8972)PQLLET(0.0410)PIHAS(0.0275)QIQK;
AAESETPGKSPEK	AAES[79.9663]ETPGKSPEK	K	K	418	430	13	2	4S(79.9663)	sp|O76021|RL1D1_HUMAN	O76021	RL1D1_HUMAN	RSL1D1	Ribosomal L1 domain-containing protein 1			1	0	MS/MS	STY:79.9663@AAES(0.3333)ET(0.3333)PGKS(0.3333)PEK;
AAKNSEEEEEEK	AAKNS[79.9663]EEEEEEK	K	K	559	570	12	2	5S(79.9663)	sp|Q14978|NOLC1_HUMAN	Q14978	NOLC1_HUMAN	NOLC1	Nucleolar and coiled-body phosphoprotein 1			3	6.64271e+06	MS/MS	STY:79.9663@AAKNS(1.0000)EEEEEEK;
AALAPAKESPR	AALAPAKES[79.9663]PR	R	K	898	908	11	2,3	9S(79.9663)	sp|Q13428|TCOF_HUMAN	Q13428	TCOF_HUMAN	TCOF1	Treacle protein			3	3.95402e+06	MS/MS	STY:79.9663@AALAPAKES(1.0000)PR;
AALLAQYADVTDEEDEADEK	AALLAQYADVT[79.9663]DEEDEADEK	K	D	129	148	20	2	11T(79.9663)	sp|Q96MW1|CCD43_HUMAN	Q96MW1	CCD43_HUMAN	CCDC43	Coiled-coil domain-containing protein 43			1	0	MS/MS	STY:79.9663@AALLAQY(0.4934)ADVT(0.5066)DEEDEADEK;
AAPEASSPPASPLQHLLPGK	AAPEAS[79.9663]SPPASPLQHLLPGK	K	A	686	705	20	3	6S(79.9663)	sp|Q96TA1|NIBA2_HUMAN	Q96TA1	NIBA2_HUMAN	NIBAN2	Protein Niban 2			1	4664789	MS/MS	STY:79.9663@AAPEAS(0.4906)S(0.4906)PPAS(0.0188)PLQHLLPGK;
AAPEASSPPASPLQHLLPGK	AAPEAS[79.9663]SPPAS[79.9663]PLQHLLPGK	K	A	686	705	20	3	11S(79.9663),6S(79.9663)	sp|Q96TA1|NIBA2_HUMAN	Q96TA1	NIBA2_HUMAN	NIBAN2	Protein Niban 2			1	7.21785e+06	MS/MS	STY:79.9663@AAPEAS(0.6565)S(0.6565)PPAS(0.6869)PLQHLLPGK;
AAPEASSPPASPLQHLLPGK	AAPEAS[79.9663]S[79.9663]PPASPLQHLLPGK	K	A	686	705	20	3	6S(79.9663),7S(79.9663)	sp|Q96TA1|NIBA2_HUMAN	Q96TA1	NIBA2_HUMAN	NIBAN2	Protein Niban 2			1	7.21785e+06	MS/MS	STY:79.9663@AAPEAS(0.6667)S(0.6667)PPAS(0.6667)PLQHLLPGK;
AAPQSPSVPK	AAPQSPS[79.9663]VPK	K	K	988	997	10	2	7S(79.9663)	sp|O75694|NU155_HUMAN	O75694	NU155_HUMAN	NUP155	Nuclear pore complex protein Nup155			1	0	MS/MS	STY:79.9663@AAPQS(0.0633)PS(0.9367)VPK;
AAPQSPSVPK	AAPQS[79.9663]PSVPK	K	K	988	997	10	2	5S(79.9663)	sp|O75694|NU155_HUMAN	O75694	NU155_HUMAN	NUP155	Nuclear pore complex protein Nup155			1	0	MS/MS	STY:79.9663@AAPQS(0.9480)PS(0.0520)VPK;
AAPSTAPAEATPPKPGEAEAPPK	AAPSTAPAEAT[79.9663]PPKPGEAEAPPK	R	H	396	418	23	3	11T(79.9663)	sp|O95817|BAG3_HUMAN	O95817	BAG3_HUMAN	BAG3	BAG family molecular chaperone regulator 3			1	2.85731e+06	MS/MS	STY:79.9663@AAPS(0.0269)T(0.0269)APAEAT(0.9463)PPKPGEAEAPPK;
AAPSTAPAEATPPKPGEAEAPPK	AAPST[79.9663]APAEATPPKPGEAEAPPK	R	H	396	418	23	3	5T(79.9663)	sp|O95817|BAG3_HUMAN	O95817	BAG3_HUMAN	BAG3	BAG family molecular chaperone regulator 3			1	2.85731e+06	MS/MS	STY:79.9663@AAPS(0.0176)T(0.4912)APAEAT(0.4912)PPKPGEAEAPPK;
AASAPAKESPR	AASAPAKES[79.9663]PR	R	K	438	448	11	3	9S(79.9663)	sp|Q13428|TCOF_HUMAN	Q13428	TCOF_HUMAN	TCOF1	Treacle protein			1	0	MS/MS	STY:79.9663@AAS(0.1099)APAKES(0.8901)PR;
AASAPAKESPRK	AASAPAKES[79.9663]PRK	R	G	438	449	12	2	9S(79.9663)	sp|Q13428|TCOF_HUMAN	Q13428	TCOF_HUMAN	TCOF1	Treacle protein			1	0	MS/MS	STY:79.9663@AAS(0.1021)APAKES(0.8979)PRK;
AASPSPQSVR	AASPSPQS[79.9663]VR	K	R	736	745	10	2	8S(79.9663)	sp|Q8IYB3|SRRM1_HUMAN	Q8IYB3	SRRM1_HUMAN	SRRM1	Serine/arginine repetitive matrix protein 1			1	1.2173424E7	MS/MS	STY:79.9663@AAS(0.3586)PS(0.0210)PQS(0.6204)VR;
AASPSPQSVR	AASPS[79.9663]PQSVR	K	R	736	745	10	2	5S(79.9663)	sp|Q8IYB3|SRRM1_HUMAN	Q8IYB3	SRRM1_HUMAN	SRRM1	Serine/arginine repetitive matrix protein 1			1	6.09869e+06	MS/MS	STY:79.9663@AAS(0.0177)PS(0.4911)PQS(0.4911)VR;
AASLTEDR	AAS[79.9663]LTEDR	K	D	1207	1214	8	2	3S(79.9663)	sp|Q04637|IF4G1_HUMAN	Q04637	IF4G1_HUMAN	EIF4G1	Eukaryotic translation initiation factor 4 gamma 1			1	2745293	MS/MS	STY:79.9663@AAS(0.5000)LT(0.5000)EDR;
AASLTEDRDR	AAS[79.9663]LTEDRDR	K	G	1207	1216	10	2	3S(79.9663)	sp|Q04637|IF4G1_HUMAN	Q04637	IF4G1_HUMAN	EIF4G1	Eukaryotic translation initiation factor 4 gamma 1			1	7259692	MS/MS	STY:79.9663@AAS(0.5000)LT(0.5000)EDRDR;
AASPPASASDLIEQQQK	AAS[79.9663]PPASASDLIEQQQK	R	R	333	349	17	2	3S(79.9663)	sp|Q5VSL9|STRP1_HUMAN	Q5VSL9	STRP1_HUMAN	STRIP1	Striatin-interacting protein 1			2	4.56212e+06	MS/MS	STY:79.9663@AAS(0.7143)PPAS(0.2519)AS(0.0337)DLIEQQQK;
AASPSPQSVR	AAS[79.9663]PSPQSVR	K	R	736	745	10	2	3S(79.9663)	sp|Q8IYB3|SRRM1_HUMAN	Q8IYB3	SRRM1_HUMAN	SRRM1	Serine/arginine repetitive matrix protein 1			4	1.827211E7	MS/MS	STY:79.9663@AAS(0.9469)PS(0.0266)PQS(0.0265)VR;
AAVVTSPPPTTAPHK	AAVVT[79.9663]SPPPTTAPHK	R	E	7	21	15	2	5T(79.9663)	sp|P35611|ADDA_HUMAN	P35611	ADDA_HUMAN	ADD1	Alpha-adducin			1	2.10464e+06	MS/MS	STY:79.9663@AAVVT(0.4878)S(0.4878)PPPT(0.0122)T(0.0122)APHK;
ADAPDAGAQSDSELPSYHQNDVSLDR	ADAPDAGAQSDSELPS[79.9663]YHQNDVSLDR	R	G	1290	1315	26	3	16S(79.9663)	sp|Q92538|GBF1_HUMAN	Q92538	GBF1_HUMAN	GBF1	Golgi-specific brefeldin A-resistance guanine nucleotide exchange factor 1			1	7271107	MS/MS	STY:79.9663@ADAPDAGAQS(0.1348)DS(0.1348)ELPS(0.7063)Y(0.0107)HQNDVS(0.0135)LDR;
ADEASELACPTPK	ADEASELAC[57.0215]PT[79.9663]PK	K	E	2194	2206	13	2	11T(79.9663),9C(57.0215)	sp|P49327|FAS_HUMAN	P49327	FAS_HUMAN	FASN	Fatty acid synthase			2	4.68112e+06	MS/MS	STY:79.9663@ADEAS(0.0508)ELACPT(0.9492)PK;
ADEASELACPTPK	ADEAS[79.9663]ELAC[57.0215]PTPK	K	E	2194	2206	13	2	5S(79.9663),9C(57.0215)	sp|P49327|FAS_HUMAN	P49327	FAS_HUMAN	FASN	Fatty acid synthase			1	4.68112e+06	MS/MS	STY:79.9663@ADEAS(0.5000)ELACPT(0.5000)PK;
ADLNQGIGEPQSPSR	ADLNQGIGEPQS[79.9663]PSR	R	R	63	77	15	2	12S(79.9663)	sp|Q96C19|EFHD2_HUMAN	Q96C19	EFHD2_HUMAN	EFHD2	EF-hand domain-containing protein D2			1	0	MS/MS	STY:79.9663@ADLNQGIGEPQS(0.5000)PS(0.5000)R;
ADSDGAKPEPVAMAR	ADS[79.9663]DGAKPEPVAMAR	K	S	238	252	15	2	3S(79.9663)	sp|Q7Z4V5|HDGR2_HUMAN	Q7Z4V5	HDGR2_HUMAN	HDGFL2	Hepatoma-derived growth factor-related protein 2			6	1.9131054E7	MS/MS	STY:79.9663@ADS(1.0000)DGAKPEPVAMAR;
AEDGATPSPSNETPK	AEDGATPSPSNET[79.9663]PK	K	K	138	152	15	2	13T(79.9663)	sp|P29966|MARCS_HUMAN	P29966	MARCS_HUMAN	MARCKS	Myristoylated alanine-rich C-kinase substrate			3	1.462445E7	MS/MS	STY:79.9663@AEDGAT(0.0232)PS(0.0232)PS(0.0281)NET(0.9255)PK;
AEDGATPSPSNETPKK	AEDGATPSPSNET[79.9663]PKK	K	K	138	153	16	2	13T(79.9663)	sp|P29966|MARCS_HUMAN	P29966	MARCS_HUMAN	MARCKS	Myristoylated alanine-rich C-kinase substrate			1	1.89e+06	MS/MS	STY:79.9663@AEDGAT(0.0200)PS(0.0278)PS(0.0278)NET(0.9244)PKK;
AEDGATPSPSNETPK	AEDGATPSPS[79.9663]NETPK	K	K	138	152	15	2	10S(79.9663)	sp|P29966|MARCS_HUMAN	P29966	MARCS_HUMAN	MARCKS	Myristoylated alanine-rich C-kinase substrate			1	9490745	MS/MS	STY:79.9663@AEDGAT(0.0169)PS(0.0169)PS(0.9106)NET(0.0555)PK;
AEDGATPSPSNETPK	AEDGATPS[79.9663]PSNETPK	K	K	138	152	15	2	8S(79.9663)	sp|P29966|MARCS_HUMAN	P29966	MARCS_HUMAN	MARCKS	Myristoylated alanine-rich C-kinase substrate			2	9490745	MS/MS	STY:79.9663@AEDGAT(0.0179)PS(0.9461)PS(0.0180)NET(0.0180)PK;
AEDGATPSPSNETPKK	AEDGATPS[79.9663]PSNETPKK	K	K	138	153	16	2	8S(79.9663)	sp|P29966|MARCS_HUMAN	P29966	MARCS_HUMAN	MARCKS	Myristoylated alanine-rich C-kinase substrate			2	1.89e+06	MS/MS	STY:79.9663@AEDGAT(0.0174)PS(0.8501)PS(0.1005)NET(0.0320)PKK;
AEDGATPSPSNETPK	AEDGAT[79.9663]PSPSNETPK	K	K	138	152	15	2	6T(79.9663)	sp|P29966|MARCS_HUMAN	P29966	MARCS_HUMAN	MARCKS	Myristoylated alanine-rich C-kinase substrate			1	9490745	MS/MS	STY:79.9663@AEDGAT(0.9340)PS(0.0220)PS(0.0220)NET(0.0220)PK;
AEEDEILNRSPR	AEEDEILNRS[79.9663]PR	K	N	574	585	12	2	10S(79.9663)	sp|P27824|CALX_HUMAN	P27824	CALX_HUMAN	CANX	Calnexin			13	5.6225965E8	MS/MS	STY:79.9663@AEEDEILNRS(1.0000)PR;
AEEPPSQLDQDTQVQDMDEGSDDEEEGQK	AEEPPSQLDQDTQVQDMDEGS[79.9663]DDEEEGQK	K	V	339	367	29	3	21S(79.9663)	sp|Q15459|SF3A1_HUMAN	Q15459	SF3A1_HUMAN	SF3A1	Splicing factor 3A subunit 1			4	8926506	MS/MS	STY:79.9663@AEEPPS(0.0394)QLDQDT(0.0275)QVQDMDEGS(0.9331)DDEEEGQK;
AEGAATEEEGTPK	AEGAATEEEGT[79.9663]PK	K	E	26	38	13	2	11T(79.9663)	sp|P80723|BASP1_HUMAN	P80723	BASP1_HUMAN	BASP1	Brain acid soluble protein 1			2	4640717	MS/MS	STY:79.9663@AEGAAT(0.0524)EEEGT(0.9476)PK;
AEGAATEEEGTPK	AEGAAT[79.9663]EEEGTPK	K	E	26	38	13	2	6T(79.9663)	sp|P80723|BASP1_HUMAN	P80723	BASP1_HUMAN	BASP1	Brain acid soluble protein 1			1	4640717	MS/MS	STY:79.9663@AEGAAT(0.9106)EEEGT(0.0894)PK;
AEGEPQEESPLK	AEGEPQEES[79.9663]PLK	K	S	169	180	12	2	9S(79.9663)	sp|Q9NYF8|BCLF1_HUMAN	Q9NYF8	BCLF1_HUMAN	BCLAF1	Bcl-2-associated transcription factor 1			4	1.171932E7	MS/MS	STY:79.9663@AEGEPQEES(1.0000)PLK;
AEQGSEEEGEGEEEEEEGGESK	AEQGSEEEGEGEEEEEEGGES[79.9663]K	K	A	224	245	22	2	21S(79.9663)	sp|Q8NE71|ABCF1_HUMAN	Q8NE71	ABCF1_HUMAN	ABCF1	ATP-binding cassette sub-family F member 1			1	0	MS/MS	STY:79.9663@AEQGS(0.3938)EEEGEGEEEEEEGGES(0.6062)K;
AESPESSAIESTQSTPQK	AES[79.9663]PESSAIESTQSTPQK	R	G	1356	1373	18	2,3	3S(79.9663)	sp|Q9NTI5|PDS5B_HUMAN	Q9NTI5	PDS5B_HUMAN	PDS5B	Sister chromatid cohesion protein PDS5 homolog B			4	7.49705e+06	MS/MS	STY:79.9663@AES(0.9468)PES(0.0089)S(0.0089)AIES(0.0089)T(0.0089)QS(0.0089)T(0.0089)PQK;
AETSEGSGSAPAVPEASASPK	AETSEGSGSAPAVPEAS[79.9663]ASPK	K	Q	62	82	21	3	17S(79.9663)	sp|P51608|MECP2_HUMAN	P51608	MECP2_HUMAN	MECP2	Methyl-CpG-binding protein 2			1	0	MS/MS	STY:79.9663@AET(0.0119)S(0.0119)EGS(0.0119)GS(0.0124)APAVPEAS(0.4760)AS(0.4760)PK;
AETSEGSGSAPAVPEASASPK	AETSEGS[79.9663]GSAPAVPEASASPK	K	Q	62	82	21	2	7S(79.9663)	sp|P51608|MECP2_HUMAN	P51608	MECP2_HUMAN	MECP2	Methyl-CpG-binding protein 2			1	0	MS/MS	STY:79.9663@AET(0.0173)S(0.0173)EGS(0.4693)GS(0.4693)APAVPEAS(0.0134)AS(0.0134)PK;
AETPTESVSEPEVATK	AET[79.9663]PTESVSEPEVATK	K	Q	193	208	16	2	3T(79.9663)	sp|P18858|DNLI1_HUMAN	P18858	DNLI1_HUMAN	LIG1	DNA ligase 1			1	2.13487e+06	MS/MS	STY:79.9663@AET(0.3251)PT(0.3251)ES(0.3251)VS(0.0124)EPEVAT(0.0124)K;
AETSEGSGSAPAVPEASASPK	AET[79.9663]SEGSGSAPAVPEASASPK	K	Q	62	82	21	2	3T(79.9663)	sp|P51608|MECP2_HUMAN	P51608	MECP2_HUMAN	MECP2	Methyl-CpG-binding protein 2			1	0	MS/MS	STY:79.9663@AET(0.2242)S(0.2242)EGS(0.2242)GS(0.0049)APAVPEAS(0.1612)AS(0.1612)PK;
AFAAVPTSHPPEDAPAQPPTPGPAASPEQLSFR	AFAAVPTSHPPEDAPAQPPT[79.9663]PGPAASPEQLSFR	R	E	1323	1355	33	3	20T(79.9663)	sp|Q14160|SCRIB_HUMAN	Q14160	SCRIB_HUMAN	SCRIB	Protein scribble homolog			1	3.97554e+06	MS/MS	STY:79.9663@AFAAVPT(0.0175)S(0.0175)HPPEDAPAQPPT(0.9101)PGPAAS(0.0363)PEQLS(0.0186)FR;
AFGPGLQGGSAGSPAR	AFGPGLQGGSAGS[79.9663]PAR	K	F	1072	1087	16	2	13S(79.9663)	sp|P21333|FLNA_HUMAN	P21333	FLNA_HUMAN	FLNA	Filamin-A			1	5.52347e+06	MS/MS	STY:79.9663@AFGPGLQGGS(0.0594)AGS(0.9406)PAR;
AFGPGLQGGSAGSPAR	AFGPGLQGGS[79.9663]AGSPAR	K	F	1072	1087	16	2	10S(79.9663)	sp|P21333|FLNA_HUMAN	P21333	FLNA_HUMAN	FLNA	Filamin-A			1	5.52347e+06	MS/MS	STY:79.9663@AFGPGLQGGS(0.5000)AGS(0.5000)PAR;
AFVEDSEDEDGAGEGGSSLLQK	AFVEDS[79.9663]EDEDGAGEGGSSLLQK	R	R	166	187	22	2	6S(79.9663)	sp|Q8N9T8|KRI1_HUMAN	Q8N9T8	KRI1_HUMAN	KRI1	Protein KRI1 homolog			2	0	MS/MS	STY:79.9663@AFVEDS(0.8347)EDEDGAGEGGS(0.0827)S(0.0827)LLQK;
AGDLLEDSPK	AGDLLEDS[79.9663]PK	R	R	158	167	10	2	8S(79.9663)	sp|P51858|HDGF_HUMAN	P51858	HDGF_HUMAN	HDGF	Hepatoma-derived growth factor			12	1.53402704E8	MS/MS	STY:79.9663@AGDLLEDS(1.0000)PK;
AGDLLEDSPKRPK	AGDLLEDS[79.9663]PKRPK	R	E	158	170	13	3	8S(79.9663)	sp|P51858|HDGF_HUMAN	P51858	HDGF_HUMAN	HDGF	Hepatoma-derived growth factor			1	6780582	MS/MS	STY:79.9663@AGDLLEDS(1.0000)PKRPK;
AGEPNSPDAEEANSPDVTAGCDPAGVHPPR	AGEPNSPDAEEANSPDVT[79.9663]AGC[57.0215]DPAGVHPPR	R	-	738	767	30	3	18T(79.9663),21C(57.0215)	sp|Q08J23|NSUN2_HUMAN	Q08J23	NSUN2_HUMAN	NSUN2	RNA cytosine C(5)-methyltransferase NSUN2			3	7.6914544E7	MS/MS	STY:79.9663@AGEPNS(0.1519)PDAEEANS(0.0254)PDVT(0.8227)AGCDPAGVHPPR;
AGEPNSPDAEEANSPDVTAGCDPAGVHPPR	AGEPNSPDAEEANS[79.9663]PDVTAGC[57.0215]DPAGVHPPR	R	-	738	767	30	3	14S(79.9663),21C(57.0215)	sp|Q08J23|NSUN2_HUMAN	Q08J23	NSUN2_HUMAN	NSUN2	RNA cytosine C(5)-methyltransferase NSUN2			3	6.01237E7	MS/MS	STY:79.9663@AGEPNS(0.1795)PDAEEANS(0.7207)PDVT(0.0997)AGCDPAGVHPPR;
AGEPNSPDAEEANSPDVTAGCDPAGVHPPR	AGEPNS[79.9663]PDAEEANSPDVTAGC[57.0215]DPAGVHPPR	R	-	738	767	30	3,4	21C(57.0215),6S(79.9663)	sp|Q08J23|NSUN2_HUMAN	Q08J23	NSUN2_HUMAN	NSUN2	RNA cytosine C(5)-methyltransferase NSUN2			12	8.36836E7	MS/MS	STY:79.9663@AGEPNS(0.9480)PDAEEANS(0.0261)PDVT(0.0259)AGCDPAGVHPPR;
AGEPNSPDAEEANSPDVTAGCDPAGVHPPR	AGEPNS[79.9663]PDAEEANS[79.9663]PDVTAGC[57.0215]DPAGVHPPR	R	-	738	767	30	3	14S(79.9663),21C(57.0215),6S(79.9663)	sp|Q08J23|NSUN2_HUMAN	Q08J23	NSUN2_HUMAN	NSUN2	RNA cytosine C(5)-methyltransferase NSUN2			3	9975357	MS/MS	STY:79.9663@AGEPNS(0.7441)PDAEEANS(0.7483)PDVT(0.5076)AGCDPAGVHPPR;
AGEQQLSEPEDMEMEAGDTDDPPR	AGEQQLS[79.9663]EPEDMEMEAGDTDDPPR	K	I	12	35	24	3	7S(79.9663)	sp|Q93009|UBP7_HUMAN	Q93009	UBP7_HUMAN	USP7	Ubiquitin carboxyl-terminal hydrolase 7			1	3.89798e+06	MS/MS	STY:79.9663@AGEQQLS(0.9311)EPEDMEMEAGDT(0.0689)DDPPR;
AGGASPAASSTAQPPTQHR	AGGAS[79.9663]PAASSTAQPPTQHR	R	L	449	467	19	2	5S(79.9663)	sp|Q8IU81|I2BP1_HUMAN	Q8IU81	I2BP1_HUMAN	IRF2BP1	Interferon regulatory factor 2-binding protein 1			1	0	MS/MS	STY:79.9663@AGGAS(0.9448)PAAS(0.0140)S(0.0137)T(0.0137)AQPPT(0.0137)QHR;
AGGSAALSPSK	AGGSAALSPS[79.9663]K	K	K	24	34	11	2	10S(79.9663)	sp|Q92522|H1X_HUMAN	Q92522	H1X_HUMAN	H1-10	Histone H1.10			3	3.988376E7	MS/MS	STY:79.9663@AGGS(0.0268)AALS(0.0268)PS(0.9463)K;
AGGSAALSPSK	AGGSAALS[79.9663]PSK	K	K	24	34	11	2	8S(79.9663)	sp|Q92522|H1X_HUMAN	Q92522	H1X_HUMAN	H1-10	Histone H1.10			7	3.988376E7	MS/MS	STY:79.9663@AGGS(0.0292)AALS(0.8077)PS(0.1631)K;
AGGSAALSPSKK	AGGSAALS[79.9663]PSKK	K	R	24	35	12	2	8S(79.9663)	sp|Q92522|H1X_HUMAN	Q92522	H1X_HUMAN	H1-10	Histone H1.10			1	1.15395e+06	MS/MS	STY:79.9663@AGGS(0.0169)AALS(0.4916)PS(0.4916)KK;
AGGSAALSPSK	AGGS[79.9663]AALSPSK	K	K	24	34	11	2	4S(79.9663)	sp|Q92522|H1X_HUMAN	Q92522	H1X_HUMAN	H1-10	Histone H1.10			3	3.988376E7	MS/MS	STY:79.9663@AGGS(0.5509)AALS(0.2245)PS(0.2245)K;
AGITSAMATRTSLK	AGITSAM[15.9949]AT[79.9663]RTSLK	K	D	439	452	14	2	7M(15.9949),9T(79.9663)	sp|O14795|UN13B_HUMAN	O14795	UN13B_HUMAN	UNC13B	Protein unc-13 homolog B			1	0	MS/MS	STY:79.9663@AGIT(0.0163)S(0.0163)AMAT(0.9354)RT(0.0160)S(0.0160)LK;M:15.9949@AGITSAM(1.0000)ATRTSLK;
AGLESGAEPGDGDSDTTK	AGLESGAEPGDGDSDT[79.9663]TK	K	K	481	498	18	2	16T(79.9663)	sp|O60832|DKC1_HUMAN	O60832	DKC1_HUMAN	DKC1	H/ACA ribonucleoprotein complex subunit DKC1			1	1.6639076E7	MS/MS	STY:79.9663@AGLES(0.0257)GAEPGDGDS(0.0117)DT(0.4813)T(0.4813)K;
AGLESGAEPGDGDSDTTK	AGLESGAEPGDGDS[79.9663]DTTK	K	K	481	498	18	2	14S(79.9663)	sp|O60832|DKC1_HUMAN	O60832	DKC1_HUMAN	DKC1	H/ACA ribonucleoprotein complex subunit DKC1			2	2.499164E7	MS/MS	STY:79.9663@AGLES(0.0078)GAEPGDGDS(0.3307)DT(0.3307)T(0.3307)K;
AGLESGAEPGDGDSDTTKK	AGLESGAEPGDGDS[79.9663]DTTKK	K	K	481	499	19	2	14S(79.9663)	sp|O60832|DKC1_HUMAN	O60832	DKC1_HUMAN	DKC1	H/ACA ribonucleoprotein complex subunit DKC1			1	1.37918e+06	MS/MS	STY:79.9663@AGLES(0.0907)GAEPGDGDS(0.3031)DT(0.3031)T(0.3031)KK;
AGLESGAEPGDGDSDTTK	AGLES[79.9663]GAEPGDGDSDTTK	K	K	481	498	18	2	5S(79.9663)	sp|O60832|DKC1_HUMAN	O60832	DKC1_HUMAN	DKC1	H/ACA ribonucleoprotein complex subunit DKC1			1	1.6639076E7	MS/MS	STY:79.9663@AGLES(0.6439)GAEPGDGDS(0.1336)DT(0.1522)T(0.0703)K;
AGLESGAEPGDGDSDTTKK	AGLES[79.9663]GAEPGDGDSDTTKK	K	K	481	499	19	2	5S(79.9663)	sp|O60832|DKC1_HUMAN	O60832	DKC1_HUMAN	DKC1	H/ACA ribonucleoprotein complex subunit DKC1			1	1.37918e+06	MS/MS	STY:79.9663@AGLES(0.2500)GAEPGDGDS(0.2500)DT(0.2500)T(0.2500)KK;
AGMSSNQSISSPVLDAVPR	AGMSSNQSISS[79.9663]PVLDAVPR	K	T	1394	1412	19	2	11S(79.9663)	sp|Q9UQ35|SRRM2_HUMAN	Q9UQ35	SRRM2_HUMAN	SRRM2	Serine/arginine repetitive matrix protein 2			1	3.44683e+06	MS/MS	STY:79.9663@AGMS(0.0139)S(0.0139)NQS(0.0139)IS(0.0274)S(0.9308)PVLDAVPR;
AGMSSNQSISSPVLDAVPR	AGMSSNQSIS[79.9663]SPVLDAVPR	K	T	1394	1412	19	2	10S(79.9663)	sp|Q9UQ35|SRRM2_HUMAN	Q9UQ35	SRRM2_HUMAN	SRRM2	Serine/arginine repetitive matrix protein 2			1	3.44683e+06	MS/MS	STY:79.9663@AGMS(0.1380)S(0.0793)NQS(0.0173)IS(0.3827)S(0.3827)PVLDAVPR;
AGSNEDPILAPSGTPPPTIPPDETFGGR	AGSNEDPILAPSGT[79.9663]PPPTIPPDETFGGR	R	V	732	759	28	3	14T(79.9663)	sp|Q8IZL8|PELP1_HUMAN	Q8IZL8	PELP1_HUMAN	PELP1	Proline-, glutamic acid- and leucine-rich protein 1			1	6194794	MS/MS	STY:79.9663@AGS(0.0626)NEDPILAPS(0.0130)GT(0.8890)PPPT(0.0131)IPPDET(0.0224)FGGR;
AGSNEDPILAPSGTPPPTIPPDETFGGR	AGS[79.9663]NEDPILAPSGTPPPTIPPDETFGGR	R	V	732	759	28	3	3S(79.9663)	sp|Q8IZL8|PELP1_HUMAN	Q8IZL8	PELP1_HUMAN	PELP1	Proline-, glutamic acid- and leucine-rich protein 1			1	1.6416181E7	MS/MS	STY:79.9663@AGS(0.9470)NEDPILAPS(0.0133)GT(0.0133)PPPT(0.0133)IPPDET(0.0131)FGGR;
AHSSPASLQLGAVSPGTLTPTGVVSGPAATPTAQHLR	AHSSPASLQLGAVSPGTLTPTGVVSGPAAT[79.9663]PTAQHLR	R	Q	125	161	37	3	30T(79.9663)	sp|P46937|YAP1_HUMAN	P46937	YAP1_HUMAN	YAP1	Transcriptional coactivator YAP1			1	5587889	MS/MS	STY:79.9663@AHS(0.1194)S(0.1194)PAS(0.1194)LQLGAVS(0.0878)PGT(0.0776)LT(0.0688)PT(0.0706)GVVS(0.0848)GPAAT(0.1261)PT(0.1261)AQHLR;
AHSSPASLQLGAVSPGTLTPTGVVSGPAATPTAQHLR	AHSSPAS[79.9663]LQLGAVSPGTLTPTGVVSGPAATPTAQHLR	R	Q	125	161	37	4	7S(79.9663)	sp|P46937|YAP1_HUMAN	P46937	YAP1_HUMAN	YAP1	Transcriptional coactivator YAP1			1	3950334	MS/MS	STY:79.9663@AHS(0.0026)S(0.0026)PAS(0.3097)LQLGAVS(0.1382)PGT(0.1357)LT(0.0896)PT(0.1222)GVVS(0.0420)GPAAT(0.0734)PT(0.0839)AQHLR;
AHTPTPGIYMGR	AHT[79.9663]PTPGIYMGR	R	P	200	211	12	2,3	3T(79.9663)	sp|Q13595|TRA2A_HUMAN	Q13595	TRA2A_HUMAN	TRA2A	Transformer-2 protein homolog alpha			7	1.3368275E7	MS/MS	STY:79.9663@AHT(0.9481)PT(0.0260)PGIY(0.0259)MGR;
AIGGIILTASHNPGGPNGDFGIK	AIGGIILTAS[79.9663]HNPGGPNGDFGIK	K	F	108	130	23	3	10S(79.9663)	sp|P36871|PGM1_HUMAN	P36871	PGM1_HUMAN	PGM1	Phosphoglucomutase-1			1	3078849	MS/MS	STY:79.9663@AIGGIILT(0.0546)AS(0.9454)HNPGGPNGDFGIK;
AIGGIILTASHNPGGPNGDFGIK	AIGGIILT[79.9663]ASHNPGGPNGDFGIK	K	F	108	130	23	3	8T(79.9663)	sp|P36871|PGM1_HUMAN	P36871	PGM1_HUMAN	PGM1	Phosphoglucomutase-1			5	2.130933E7	MS/MS	STY:79.9663@AIGGIILT(0.9488)AS(0.0512)HNPGGPNGDFGIK;
AIGNNSATSPR	AIGNNS[79.9663]ATSPR	R	V	442	452	11	2	6S(79.9663)	sp|Q9NYJ8|TAB2_HUMAN	Q9NYJ8	TAB2_HUMAN	TAB2	TGF-beta-activated kinase 1 and MAP3K7-binding protein 2			1	0	MS/MS	STY:79.9663@AIGNNS(0.3333)AT(0.3333)S(0.3333)PR;
AIPGDQHPESPVHTEPMGIQGR	AIPGDQHPESPVHT[79.9663]EPMGIQGR	R	G	784	805	22	3	14T(79.9663)	sp|Q14676|MDC1_HUMAN	Q14676	MDC1_HUMAN	MDC1	Mediator of DNA damage checkpoint protein 1			1	5.49747e+06	MS/MS	STY:79.9663@AIPGDQHPES(0.2286)PVHT(0.7714)EPMGIQGR;
AIPGDQHPESPVHTEPMGIQGR	AIPGDQHPES[79.9663]PVHTEPMGIQGR	R	G	784	805	22	3	10S(79.9663)	sp|Q14676|MDC1_HUMAN	Q14676	MDC1_HUMAN	MDC1	Mediator of DNA damage checkpoint protein 1			1	5.49747e+06	MS/MS	STY:79.9663@AIPGDQHPES(0.9482)PVHT(0.0518)EPMGIQGR;
AIPVSPSAVEEDEDEDGHTVVATAR	AIPVS[79.9663]PSAVEEDEDEDGHTVVATAR	K	G	1613	1637	25	3	5S(79.9663)	sp|Q07157|ZO1_HUMAN	Q07157	ZO1_HUMAN	TJP1	Tight junction protein 1			2	2943883	MS/MS	STY:79.9663@AIPVS(0.4835)PS(0.4835)AVEEDEDEDGHT(0.0165)VVAT(0.0165)AR;
AITSLLGGGSPK	AITSLLGGGS[79.9663]PK	K	N	2649	2660	12	2	10S(79.9663)	sp|Q6KC79|NIPBL_HUMAN	Q6KC79	NIPBL_HUMAN	NIPBL	Nipped-B-like protein			1	6.90561e+06	MS/MS	STY:79.9663@AIT(0.0282)S(0.0282)LLGGGS(0.9435)PK;
AKSPQPPVEEEDEHFDDTVVCLDTYNCDLHFK	AKSPQPPVEEEDEHFDDT[79.9663]VVC[57.0215]LDTYNC[57.0215]DLHFK	R	I	269	300	32	4	18T(79.9663),21C(57.0215),27C(57.0215)	sp|Q00839|HNRPU_HUMAN	Q00839	HNRPU_HUMAN	HNRNPU	Heterogeneous nuclear ribonucleoprotein U			1	2.1380344E7	MS/MS	STY:79.9663@AKS(0.1633)PQPPVEEEDEHFDDT(0.6166)VVCLDT(0.1100)Y(0.1100)NCDLHFK;
AKSPTPESSTIASYVTLR	AKSPTPESST[79.9663]IASYVTLR	R	K	853	870	18	3	10T(79.9663)	sp|Q9HAU0|PKHA5_HUMAN	Q9HAU0	PKHA5_HUMAN	PLEKHA5	Pleckstrin homology domain-containing family A member 5			1	1.00388e+06	MS/MS	STY:79.9663@AKS(0.1261)PT(0.1261)PES(0.1261)S(0.0029)T(0.1547)IAS(0.1547)Y(0.1547)VT(0.1547)LR;
AKSPQPPVEEEDEHFDDTVVCLDTYNCDLHFK	AKS[79.9663]PQPPVEEEDEHFDDTVVC[57.0215]LDTYNC[57.0215]DLHFK	R	I	269	300	32	4	21C(57.0215),27C(57.0215),3S(79.9663)	sp|Q00839|HNRPU_HUMAN	Q00839	HNRPU_HUMAN	HNRNPU	Heterogeneous nuclear ribonucleoprotein U			1	2.1380344E7	MS/MS	STY:79.9663@AKS(0.7643)PQPPVEEEDEHFDDT(0.1659)VVCLDT(0.0396)Y(0.0302)NCDLHFK;
AKTPVTLK	AKT[79.9663]PVTLK	R	Q	206	213	8	2	3T(79.9663)	sp|P42167|LAP2B_HUMAN	P42167	LAP2B_HUMAN	TMPO	Lamina-associated polypeptide 2, isoforms beta/gamma			3	8057999	MS/MS	STY:79.9663@AKT(0.9487)PVT(0.0513)LK;
ALPQTPRPR	ALPQT[79.9663]PRPR	K	S	1488	1496	9	2	5T(79.9663)	sp|Q9UQ35|SRRM2_HUMAN	Q9UQ35	SRRM2_HUMAN	SRRM2	Serine/arginine repetitive matrix protein 2			2	2.74615e+06	MS/MS	STY:79.9663@ALPQT(1.0000)PRPR;
ALQAPHSPSK	ALQAPHS[79.9663]PSK	R	T	37	46	10	2	7S(79.9663)	sp|Q96AQ6|PBIP1_HUMAN	Q96AQ6	PBIP1_HUMAN	PBXIP1	Pre-B-cell leukemia transcription factor-interacting protein 1			3	1.63057e+06	MS/MS	STY:79.9663@ALQAPHS(0.5000)PS(0.5000)K;
ALSSGGSITSPPLSPALPK	ALSSGGSITS[79.9663]PPLSPALPK	R	Y	17	35	19	2	10S(79.9663)	sp|Q6Y7W6|GGYF2_HUMAN	Q6Y7W6	GGYF2_HUMAN	GIGYF2	GRB10-interacting GYF protein 2			1	5018518	MS/MS	STY:79.9663@ALS(0.0957)S(0.0957)GGS(0.1672)IT(0.0439)S(0.2987)PPLS(0.2987)PALPK;
ALSSLHGDDQDSEDEVLTIPEVK	ALSSLHGDDQDS[79.9663]EDEVLTIPEVK	K	V	2398	2420	23	3	12S(79.9663)	sp|P11717|MPRI_HUMAN	P11717	MPRI_HUMAN	IGF2R	Cation-independent mannose-6-phosphate receptor			2	0	MS/MS	STY:79.9663@ALS(0.0175)S(0.0175)LHGDDQDS(0.9470)EDEVLT(0.0180)IPEVK;
ALSSGGSITSPPLSPALPK	ALSS[79.9663]GGSITSPPLSPALPK	R	Y	17	35	19	2	4S(79.9663)	sp|Q6Y7W6|GGYF2_HUMAN	Q6Y7W6	GGYF2_HUMAN	GIGYF2	GRB10-interacting GYF protein 2			1	5018518	MS/MS	STY:79.9663@ALS(0.0115)S(0.9350)GGS(0.0172)IT(0.0123)S(0.0123)PPLS(0.0118)PALPK;
ALSSGGSITSPPLSPALPK	ALS[79.9663]SGGSITSPPLSPALPK	R	Y	17	35	19	2	3S(79.9663)	sp|Q6Y7W6|GGYF2_HUMAN	Q6Y7W6	GGYF2_HUMAN	GIGYF2	GRB10-interacting GYF protein 2			1	5018518	MS/MS	STY:79.9663@ALS(0.9356)S(0.0132)GGS(0.0132)IT(0.0132)S(0.0132)PPLS(0.0115)PALPK;
ALVATPGKK	ALVAT[79.9663]PGKK	K	G	117	125	9	2	5T(79.9663)	sp|P19338|NUCL_HUMAN	P19338	NUCL_HUMAN	NCL	Nucleolin			4	3.10184e+06	MS/MS	STY:79.9663@ALVAT(1.0000)PGKK;
ALVEFESNPEETREPGSPPSVQR	ALVEFESNPEET[79.9663]REPGSPPSVQR	R	A	31	53	23	3	12T(79.9663)	sp|Q9H6F5|CCD86_HUMAN	Q9H6F5	CCD86_HUMAN	CCDC86	Coiled-coil domain-containing protein 86			2	1.8951334E7	MS/MS	STY:79.9663@ALVEFES(0.0213)NPEET(0.9310)REPGS(0.0298)PPS(0.0179)VQR;
ALVVPEPEPDSDSNQER	ALVVPEPEPDS[79.9663]DSNQER	K	K	126	142	17	2	11S(79.9663)	sp|Q5VTR2|BRE1A_HUMAN	Q5VTR2	BRE1A_HUMAN	RNF20	E3 ubiquitin-protein ligase BRE1A			2	6166980	MS/MS	STY:79.9663@ALVVPEPEPDS(0.9351)DS(0.0649)NQER;
AMADELSEK	AMADELS[79.9663]EK	K	Q	31	39	9	2	7S(79.9663)	sp|Q03135|CAV1_HUMAN	Q03135	CAV1_HUMAN	CAV1	Caveolin-1			1	2422673	MS/MS	STY:79.9663@AMADELS(1.0000)EK;
ANEAGGQVGPEAPRPPETSPEMR	ANEAGGQVGPEAPRPPET[79.9663]SPEMR	R	S	267	289	23	3	18T(79.9663)	sp|Q8N3D4|EH1L1_HUMAN	Q8N3D4	EH1L1_HUMAN	EHBP1L1	EH domain-binding protein 1-like protein 1			2	3738131	MS/MS	STY:79.9663@ANEAGGQVGPEAPRPPET(0.5000)S(0.5000)PEMR;
ANSPEKPPEAGAAHK	ANS[79.9663]PEKPPEAGAAHK	K	P	210	224	15	3	3S(79.9663)	sp|Q9UFC0|LRWD1_HUMAN	Q9UFC0	LRWD1_HUMAN	LRWD1	Leucine-rich repeat and WD repeat-containing protein 1			1	1.7611e+06	MS/MS	STY:79.9663@ANS(1.0000)PEKPPEAGAAHK;
APIDTSDVEEK	APIDTS[79.9663]DVEEK	K	A	301	311	11	2	6S(79.9663)	sp|Q06265|EXOS9_HUMAN	Q06265	EXOS9_HUMAN	EXOSC9	Exosome complex component RRP45			2	1.3218886E7	MS/MS	STY:79.9663@APIDT(0.0520)S(0.9480)DVEEK;
APIDTSDVEEK	APIDT[79.9663]SDVEEK	K	A	301	311	11	2	5T(79.9663)	sp|Q06265|EXOS9_HUMAN	Q06265	EXOS9_HUMAN	EXOSC9	Exosome complex component RRP45			1	3.90875e+06	MS/MS	STY:79.9663@APIDT(0.5000)S(0.5000)DVEEK;
APQTSSSPPPVR	APQTSSS[79.9663]PPPVR	R	R	690	701	12	2	7S(79.9663)	sp|Q8IYB3|SRRM1_HUMAN	Q8IYB3	SRRM1_HUMAN	SRRM1	Serine/arginine repetitive matrix protein 1			2	3.1190302E7	MS/MS	STY:79.9663@APQT(0.0177)S(0.0177)S(0.0181)S(0.9464)PPPVR;
APQTSSSPPPVR	APQTSS[79.9663]SPPPVR	R	R	690	701	12	2	6S(79.9663)	sp|Q8IYB3|SRRM1_HUMAN	Q8IYB3	SRRM1_HUMAN	SRRM1	Serine/arginine repetitive matrix protein 1			1	3.1190302E7	MS/MS	STY:79.9663@APQT(0.0115)S(0.0117)S(0.4884)S(0.4884)PPPVR;
APQTSSSPPPVR	APQT[79.9663]SSSPPPVR	R	R	690	701	12	2	4T(79.9663)	sp|Q8IYB3|SRRM1_HUMAN	Q8IYB3	SRRM1_HUMAN	SRRM1	Serine/arginine repetitive matrix protein 1			3	3.1190302E7	MS/MS	STY:79.9663@APQT(0.4874)S(0.4874)S(0.0126)S(0.0126)PPPVR;
APSVANVGSHCDLSLK	APSVANVGS[79.9663]HC[57.0215]DLSLK	R	I	2150	2165	16	2	11C(57.0215),9S(79.9663)	sp|P21333|FLNA_HUMAN	P21333	FLNA_HUMAN	FLNA	Filamin-A			1	1.6822022E7	MS/MS	STY:79.9663@APS(0.0327)VANVGS(0.5769)HCDLS(0.3904)LK;
APSPAPSSVPLGSEK	APS[79.9663]PAPSSVPLGSEK	R	P	2399	2413	15	2	3S(79.9663)	sp|O75179|ANR17_HUMAN	O75179	ANR17_HUMAN	ANKRD17	Ankyrin repeat domain-containing protein 17			1	1.9833e+06	MS/MS	STY:79.9663@APS(0.8967)PAPS(0.0360)S(0.0360)VPLGS(0.0313)EK;
APSVANVGSHCDLSLK	APS[79.9663]VANVGSHC[57.0215]DLSLK	R	I	2150	2165	16	2	11C(57.0215),3S(79.9663)	sp|P21333|FLNA_HUMAN	P21333	FLNA_HUMAN	FLNA	Filamin-A			6	1.6822022E7	MS/MS	STY:79.9663@APS(0.9430)VANVGS(0.0293)HCDLS(0.0277)LK;
APTAALPQGVVMAASPGSLHSPQQLAEEATR	APTAALPQGVVMAASPGSLHS[79.9663]PQQLAEEATR	R	K	257	287	31	3	21S(79.9663)	sp|Q03060|CREM_HUMAN	Q03060	CREM_HUMAN	CREM	cAMP-responsive element modulator			1	0	MS/MS	STY:79.9663@APT(0.0539)AALPQGVVMAAS(0.2253)PGS(0.1824)LHS(0.5297)PQQLAEEAT(0.0087)R;
APVQPQQSPAAAPGGTDEK	APVQPQQSPAAAPGGT[79.9663]DEK	K	P	9	27	19	2	16T(79.9663)	sp|Q13200|PSMD2_HUMAN	Q13200	PSMD2_HUMAN	PSMD2	26S proteasome non-ATPase regulatory subunit 2			1	6.73592e+06	MS/MS	STY:79.9663@APVQPQQS(0.4041)PAAAPGGT(0.5959)DEK;
APVQPQQSPAAAPGGTDEK	APVQPQQS[79.9663]PAAAPGGTDEK	K	P	9	27	19	2,3	8S(79.9663)	sp|Q13200|PSMD2_HUMAN	Q13200	PSMD2_HUMAN	PSMD2	26S proteasome non-ATPase regulatory subunit 2			3	6.73592e+06	MS/MS	STY:79.9663@APVQPQQS(0.9448)PAAAPGGT(0.0552)DEK;
APVSSTESVIQSNTPTPPPSQPLNETAEEESR	APVSSTES[79.9663]VIQSNTPTPPPSQPLNETAEEESR	K	I	884	915	32	3	8S(79.9663)	sp|Q9HC35|EMAL4_HUMAN	Q9HC35	EMAL4_HUMAN	EML4	Echinoderm microtubule-associated protein-like 4			1	5358664	MS/MS	STY:79.9663@APVS(0.0067)S(0.0067)T(0.0067)ES(0.2408)VIQS(0.2408)NT(0.2408)PT(0.2408)PPPS(0.0108)QPLNET(0.0028)AEEES(0.0030)R;
AQAVSEEEEEEEGK	AQAVS[79.9663]EEEEEEEGK	K	S	78	91	14	2	5S(79.9663)	sp|Q9GZR7|DDX24_HUMAN	Q9GZR7	DDX24_HUMAN	DDX24	ATP-dependent RNA helicase DDX24			1	0	MS/MS	STY:79.9663@AQAVS(1.0000)EEEEEEEGK;
AQGEPVAGHESPKIPYEK	AQGEPVAGHESPKIPY[79.9663]EK	R	Q	789	806	18	3	16Y(79.9663)	sp|O94979|SC31A_HUMAN	O94979	SC31A_HUMAN	SEC31A	Protein transport protein Sec31A			1	6.77112e+06	MS/MS	STY:79.9663@AQGEPVAGHES(0.1863)PKIPY(0.8137)EK;
AQGEPVAGHESPK	AQGEPVAGHES[79.9663]PK	R	I	789	801	13	2,3	11S(79.9663)	sp|O94979|SC31A_HUMAN	O94979	SC31A_HUMAN	SEC31A	Protein transport protein Sec31A			10	1.4372134E7	MS/MS	STY:79.9663@AQGEPVAGHES(1.0000)PK;
AQGEPVAGHESPKIPYEK	AQGEPVAGHES[79.9663]PKIPYEK	R	Q	789	806	18	3	11S(79.9663)	sp|O94979|SC31A_HUMAN	O94979	SC31A_HUMAN	SEC31A	Protein transport protein Sec31A			3	6.77112e+06	MS/MS	STY:79.9663@AQGEPVAGHES(0.9495)PKIPY(0.0505)EK;
AQQELVPPQQQASPPQLPK	AQQELVPPQQQAS[79.9663]PPQLPK	R	A	1057	1075	19	3	13S(79.9663)	sp|O15027|SC16A_HUMAN	O15027	SC16A_HUMAN	SEC16A	Protein transport protein Sec16A			1	2.01546e+06	MS/MS	STY:79.9663@AQQELVPPQQQAS(1.0000)PPQLPK;
AQSSPASATFPVSVQEPPTK	AQS[79.9663]SPASATFPVSVQEPPTK	R	P	630	649	20	2	3S(79.9663)	sp|P56524|HDAC4_HUMAN	P56524	HDAC4_HUMAN	HDAC4	Histone deacetylase 4			1	4799949	MS/MS	STY:79.9663@AQS(0.2464)S(0.2464)PAS(0.2464)AT(0.2464)FPVS(0.0073)VQEPPT(0.0073)K;
AQTPPGPSLSGSK	AQT[79.9663]PPGPSLSGSK	K	S	1001	1013	13	2	3T(79.9663)	sp|Q9UQ35|SRRM2_HUMAN	Q9UQ35	SRRM2_HUMAN	SRRM2	Serine/arginine repetitive matrix protein 2			7	1.1431193E7	MS/MS	STY:79.9663@AQT(0.9476)PPGPS(0.0175)LS(0.0175)GS(0.0175)K;
ARALGTEVIQLFPEKGNMGK	ARALGT[79.9663]EVIQLFPEKGNMGK	K	I	323	342	20	3	6T(79.9663)	sp|O95831|AIFM1_HUMAN	O95831	AIFM1_HUMAN	AIFM1	Apoptosis-inducing factor 1, mitochondrial			1	2.8518512E7	MS/MS	STY:79.9663@ARALGT(1.0000)EVIQLFPEKGNMGK;
ARGDSEALDEES	ARGDS[79.9663]EALDEES	R	-	660	671	12	2	5S(79.9663)	sp|Q7Z4V5|HDGR2_HUMAN	Q7Z4V5	HDGR2_HUMAN	HDGFL2	Hepatoma-derived growth factor-related protein 2			2	0	MS/MS	STY:79.9663@ARGDS(0.9023)EALDEES(0.0977);
ARSVSPPPK	ARS[79.9663]VS[79.9663]PPPK	K	R	312	320	9	2	3S(79.9663),5S(79.9663)	sp|Q13247|SRSF6_HUMAN	Q13247	SRSF6_HUMAN	SRSF6	Serine/arginine-rich splicing factor 6			1	417645	MS/MS	STY:79.9663@ARS(1.0000)VS(1.0000)PPPK;
ASAVSELSPR	ASAVSELS[79.9663]PR	R	E	236	245	10	2	8S(79.9663)	sp|Q9Y2W1|TR150_HUMAN	Q9Y2W1	TR150_HUMAN	THRAP3	Thyroid hormone receptor-associated protein 3			5	3.0027988E7	MS/MS	STY:79.9663@AS(0.0259)AVS(0.0261)ELS(0.9481)PR;
ASEDTTSGSPPKK	ASEDTTSGS[79.9663]PPKK	R	S	456	468	13	2,3	9S(79.9663)	sp|Q9BZZ5|API5_HUMAN	Q9BZZ5	API5_HUMAN	API5	Apoptosis inhibitor 5			2	9901453	MS/MS	STY:79.9663@AS(0.0143)EDT(0.0181)T(0.0181)S(0.0181)GS(0.9314)PPKK;
ASEDTTSGSPPK	ASEDT[79.9663]TSGSPPK	R	K	456	467	12	2	5T(79.9663)	sp|Q9BZZ5|API5_HUMAN	Q9BZZ5	API5_HUMAN	API5	Apoptosis inhibitor 5			1	1.71423e+06	MS/MS	STY:79.9663@AS(0.0056)EDT(0.2486)T(0.2486)S(0.2486)GS(0.2486)PPK;
ASEDTTSGSPPKK	ASEDT[79.9663]TSGSPPKK	R	S	456	468	13	2	5T(79.9663)	sp|Q9BZZ5|API5_HUMAN	Q9BZZ5	API5_HUMAN	API5	Apoptosis inhibitor 5			3	6.36482e+06	MS/MS	STY:79.9663@AS(0.0173)EDT(0.4652)T(0.4652)S(0.0262)GS(0.0262)PPKK;
ASGQAFELILSPR	ASGQAFELILS[79.9663]PR	R	S	15	27	13	2	11S(79.9663)	sp|P16949|STMN1_HUMAN	P16949	STMN1_HUMAN	STMN1	Stathmin			2	0	MS/MS	STY:79.9663@AS(0.0635)GQAFELILS(0.9365)PR;
ASLGSLEGEAEAEASSPK	ASLGSLEGEAEAEAS[79.9663]SPK	K	G	5748	5765	18	2	15S(79.9663)	sp|Q09666|AHNK_HUMAN	Q09666	AHNK_HUMAN	AHNAK	Neuroblast differentiation-associated protein AHNAK			1	6505719	MS/MS	STY:79.9663@AS(0.0417)LGS(0.0482)LEGEAEAEAS(0.4551)S(0.4551)PK;
ASLGSLEGEAEAEASSPK	ASLGS[79.9663]LEGEAEAEASSPK	K	G	5748	5765	18	3	5S(79.9663)	sp|Q09666|AHNK_HUMAN	Q09666	AHNK_HUMAN	AHNAK	Neuroblast differentiation-associated protein AHNAK			1	1.24213e+06	MS/MS	STY:79.9663@AS(0.0198)LGS(0.9345)LEGEAEAEAS(0.0229)S(0.0229)PK;
ASPAPGSGHPEGPGAHLDMNSLDR	ASPAPGS[79.9663]GHPEGPGAHLDMNSLDR	R	A	90	113	24	3	7S(79.9663)	sp|O94826|TOM70_HUMAN	O94826	TOM70_HUMAN	TOMM70	Mitochondrial import receptor subunit TOM70			4	1.6506174E7	MS/MS	STY:79.9663@AS(0.0325)PAPGS(0.9409)GHPEGPGAHLDMNS(0.0266)LDR;
ASPATQPPPLLPPSATGPDATVGGPAPTPLLPPSATASVK	ASPATQPPPLLPPSATGPDATVGGPAPT[79.9663]PLLPPSATASVK	R	M	57	96	40	4	28T(79.9663)	sp|Q07666|KHDR1_HUMAN	Q07666	KHDR1_HUMAN	KHDRBS1	KH domain-containing, RNA-binding, signal transduction-associated protein 1			1	1.3284506E7	MS/MS	STY:79.9663@AS(0.0574)PAT(0.0574)QPPPLLPPS(0.1355)AT(0.1355)GPDAT(0.0197)VGGPAPT(0.5560)PLLPPS(0.0047)AT(0.0169)AS(0.0169)VK;
ASPATQPPPLLPPSATGPDATVGGPAPTPLLPPSATASVK	ASPATQPPPLLPPSAT[79.9663]GPDATVGGPAPTPLLPPSATASVK	R	M	57	96	40	3	16T(79.9663)	sp|Q07666|KHDR1_HUMAN	Q07666	KHDR1_HUMAN	KHDRBS1	KH domain-containing, RNA-binding, signal transduction-associated protein 1			1	1.4823837E7	MS/MS	STY:79.9663@AS(0.0245)PAT(0.0245)QPPPLLPPS(0.0403)AT(0.8715)GPDAT(0.0086)VGGPAPT(0.0102)PLLPPS(0.0068)AT(0.0068)AS(0.0068)VK;
ASPATQPPPLLPPSATGPDATVGGPAPTPLLPPSATASVK	ASPATQPPPLLPPS[79.9663]ATGPDATVGGPAPTPLLPPSATASVK	R	M	57	96	40	3,4	14S(79.9663)	sp|Q07666|KHDR1_HUMAN	Q07666	KHDR1_HUMAN	KHDRBS1	KH domain-containing, RNA-binding, signal transduction-associated protein 1			2	2.9351204E7	MS/MS	STY:79.9663@AS(0.0258)PAT(0.0370)QPPPLLPPS(0.8810)AT(0.0067)GPDAT(0.0066)VGGPAPT(0.0155)PLLPPS(0.0092)AT(0.0092)AS(0.0090)VK;
ASSHSSQTQGGGSVTK	ASSHSSQT[79.9663]QGGGSVTK	R	K	402	417	16	2	8T(79.9663)	sp|P02545|LMNA_HUMAN	P02545	LMNA_HUMAN	LMNA	Prelamin-A/C			1	9351070	MS/MS	STY:79.9663@AS(0.0102)S(0.0102)HS(0.0102)S(0.0102)QT(0.9354)QGGGS(0.0148)VT(0.0089)K;
ASSHSSQTQGGGSVTK	ASSHSS[79.9663]QTQGGGSVTK	R	K	402	417	16	2	6S(79.9663)	sp|P02545|LMNA_HUMAN	P02545	LMNA_HUMAN	LMNA	Prelamin-A/C			1	5927700	MS/MS	STY:79.9663@AS(0.0072)S(0.0072)HS(0.0072)S(0.4817)QT(0.4817)QGGGS(0.0075)VT(0.0075)K;
ASSLSESSPPK	ASSLSESS[79.9663]PPK	R	A	367	377	11	2	8S(79.9663)	sp|Q9UHB6|LIMA1_HUMAN	Q9UHB6	LIMA1_HUMAN	LIMA1	LIM domain and actin-binding protein 1			1	1.03723e+06	MS/MS	STY:79.9663@AS(0.0262)S(0.0262)LS(0.0262)ES(0.0262)S(0.8953)PPK;
ASSLSESSPPK	ASSLSES[79.9663]SPPK	R	A	367	377	11	2	7S(79.9663)	sp|Q9UHB6|LIMA1_HUMAN	Q9UHB6	LIMA1_HUMAN	LIMA1	LIM domain and actin-binding protein 1			1	1.03723e+06	MS/MS	STY:79.9663@AS(0.0105)S(0.0116)LS(0.0116)ES(0.4832)S(0.4832)PPK;
ASSVTTFTGEPNTCPR	ASSVTT[79.9663]FTGEPNTC[57.0215]PR	R	C	113	128	16	2	14C(57.0215),6T(79.9663)	sp|P52943|CRIP2_HUMAN	P52943	CRIP2_HUMAN	CRIP2	Cysteine-rich protein 2			1	2.44411e+06	MS/MS	STY:79.9663@AS(0.0209)S(0.0209)VT(0.0209)T(0.9134)FT(0.0103)GEPNT(0.0135)CPR;
ASSLEDLVLK	ASS[79.9663]LEDLVLK	R	E	254	263	10	2	3S(79.9663)	sp|Q15477|SKI2_HUMAN	Q15477	SKI2_HUMAN	SKIC2	Superkiller complex protein 2			2	8616610	MS/MS	STY:79.9663@AS(0.0507)S(0.9493)LEDLVLK;
ASAPSPNAQVACDHCLK	AS[79.9663]APSPNAQVAC[57.0215]DHC[57.0215]LK	R	E	96	112	17	3	12C(57.0215),15C(57.0215),2S(79.9663)	sp|Q14258|TRI25_HUMAN	Q14258	TRI25_HUMAN	TRIM25	E3 ubiquitin/ISG15 ligase TRIM25			1	1.88812e+06	MS/MS	STY:79.9663@AS(0.5000)APS(0.5000)PNAQVACDHCLK;
ASAVSELSPR	AS[79.9663]AVSELSPR	R	E	236	245	10	2	2S(79.9663)	sp|Q9Y2W1|TR150_HUMAN	Q9Y2W1	TR150_HUMAN	THRAP3	Thyroid hormone receptor-associated protein 3			1	2.4075564E7	MS/MS	STY:79.9663@AS(0.3333)AVS(0.3333)ELS(0.3333)PR;
ASEDTTSGSPPK	AS[79.9663]EDTTSGSPPK	R	K	456	467	12	2	2S(79.9663)	sp|Q9BZZ5|API5_HUMAN	Q9BZZ5	API5_HUMAN	API5	Apoptosis inhibitor 5			2	1.71423e+06	MS/MS	STY:79.9663@AS(0.8326)EDT(0.0419)T(0.0419)S(0.0419)GS(0.0419)PPK;
ASLGSLEGEAEAEASSPK	AS[79.9663]LGSLEGEAEAEASSPK	K	G	5748	5765	18	2	2S(79.9663)	sp|Q09666|AHNK_HUMAN	Q09666	AHNK_HUMAN	AHNAK	Neuroblast differentiation-associated protein AHNAK			2	6505719	MS/MS	STY:79.9663@AS(0.5211)LGS(0.0134)LEGEAEAEAS(0.2436)S(0.2219)PK;
ASPAPGSGHPEGPGAHLDMNSLDR	AS[79.9663]PAPGSGHPEGPGAHLDMNSLDR	R	A	90	113	24	3	2S(79.9663)	sp|O94826|TOM70_HUMAN	O94826	TOM70_HUMAN	TOMM70	Mitochondrial import receptor subunit TOM70			12	2.1801236E7	MS/MS	STY:79.9663@AS(0.9482)PAPGS(0.0259)GHPEGPGAHLDMNS(0.0259)LDR;
ASPATQPPPLLPPSATGPDATVGGPAPTPLLPPSATASVK	AS[79.9663]PATQPPPLLPPSATGPDATVGGPAPTPLLPPSATASVK	R	M	57	96	40	3	2S(79.9663)	sp|Q07666|KHDR1_HUMAN	Q07666	KHDR1_HUMAN	KHDRBS1	KH domain-containing, RNA-binding, signal transduction-associated protein 1			1	1.4823837E7	MS/MS	STY:79.9663@AS(0.4254)PAT(0.4254)QPPPLLPPS(0.0135)AT(0.0100)GPDAT(0.0379)VGGPAPT(0.0556)PLLPPS(0.0109)AT(0.0109)AS(0.0106)VK;
ASPEPPGPESSSR	AS[79.9663]PEPPGPESSSR	R	W	671	683	13	2	2S(79.9663)	sp|Q9C0C2|TB182_HUMAN	Q9C0C2	TB182_HUMAN	TNKS1BP1	182 kDa tankyrase-1-binding protein			1	2827881	MS/MS	STY:79.9663@AS(0.9442)PEPPGPES(0.0186)S(0.0186)S(0.0186)R;
ASPSTAGETPSGVK	AS[79.9663]PSTAGETPSGVK	K	R	129	142	14	2	2S(79.9663)	sp|Q9UI10|EI2BD_HUMAN	Q9UI10	EI2BD_HUMAN	EIF2B4	Translation initiation factor eIF2B subunit delta			1	962740	MS/MS	STY:79.9663@AS(0.3288)PS(0.3288)T(0.3288)AGET(0.0067)PS(0.0067)GVK;
ASSHSSQTQGGGSVTK	AS[79.9663]SHSSQTQGGGSVTK	R	K	402	417	16	2	2S(79.9663)	sp|P02545|LMNA_HUMAN	P02545	LMNA_HUMAN	LMNA	Prelamin-A/C			5	1.527877E7	MS/MS	STY:79.9663@AS(0.4822)S(0.4822)HS(0.0070)S(0.0070)QT(0.0070)QGGGS(0.0070)VT(0.0076)K;
ASSHSSQTQGGGSVTK	AS[79.9663]SHSSQTQGGGS[79.9663]VTK	R	K	402	417	16	2	13S(79.9663),2S(79.9663)	sp|P02545|LMNA_HUMAN	P02545	LMNA_HUMAN	LMNA	Prelamin-A/C			1	0	MS/MS	STY:79.9663@AS(0.3193)S(0.3193)HS(0.3193)S(0.3193)QT(0.3193)QGGGS(0.3924)VT(0.0111)K;
ASSLEDLVLK	AS[79.9663]SLEDLVLK	R	E	254	263	10	2	2S(79.9663)	sp|Q15477|SKI2_HUMAN	Q15477	SKI2_HUMAN	SKIC2	Superkiller complex protein 2			1	8616610	MS/MS	STY:79.9663@AS(0.5000)S(0.5000)LEDLVLK;
ASSLSESSPPK	AS[79.9663]SLSESSPPK	R	A	367	377	11	2	2S(79.9663)	sp|Q9UHB6|LIMA1_HUMAN	Q9UHB6	LIMA1_HUMAN	LIMA1	LIM domain and actin-binding protein 1			1	1.45238e+06	MS/MS	STY:79.9663@AS(0.9265)S(0.0184)LS(0.0184)ES(0.0184)S(0.0184)PPK;
ASSVTTFTGEPNTCPR	AS[79.9663]SVTTFTGEPNTC[57.0215]PR	R	C	113	128	16	2	14C(57.0215),2S(79.9663)	sp|P52943|CRIP2_HUMAN	P52943	CRIP2_HUMAN	CRIP2	Cysteine-rich protein 2			1	2.44411e+06	MS/MS	STY:79.9663@AS(0.3264)S(0.3264)VT(0.3264)T(0.0057)FT(0.0055)GEPNT(0.0097)CPR;
ASVSPMDEPVPDSESPIEK	AS[79.9663]VSPMDEPVPDSESPIEK	R	V	1375	1393	19	2	2S(79.9663)	sp|P46821|MAP1B_HUMAN	P46821	MAP1B_HUMAN	MAP1B	Microtubule-associated protein 1B			1	2.45659e+06	MS/MS	STY:79.9663@AS(0.4560)VS(0.4560)PMDEPVPDS(0.0317)ES(0.0562)PIEK;
ATAPQTQHVSPMR	ATAPQTQHVS[79.9663]PMR	R	Q	124	136	13	2,3	10S(79.9663)	sp|P29692|EF1D_HUMAN	P29692	EF1D_HUMAN	EEF1D	Elongation factor 1-delta			7	1.45991408E8	MS/MS	STY:79.9663@AT(0.0261)APQT(0.0262)QHVS(0.9478)PMR;
ATAPQTQHVSPMR	ATAPQTQHVS[79.9663]PM[15.9949]R	R	Q	124	136	13	2,3	10S(79.9663),12M(15.9949)	sp|P29692|EF1D_HUMAN	P29692	EF1D_HUMAN	EEF1D	Elongation factor 1-delta			3	1.2856376E7	MS/MS	STY:79.9663@AT(0.0268)APQT(0.0268)QHVS(0.9464)PMR;M:15.9949@ATAPQTQHVSPM(1.0000)R;
ATAPQTQHVSPMR	ATAPQT[79.9663]QHVSPMR	R	Q	124	136	13	2	6T(79.9663)	sp|P29692|EF1D_HUMAN	P29692	EF1D_HUMAN	EEF1D	Elongation factor 1-delta			6	9.0098032E7	MS/MS	STY:79.9663@AT(0.0332)APQT(0.9404)QHVS(0.0264)PMR;
ATAPQTQHVSPMR	ATAPQT[79.9663]QHVSPM[15.9949]R	R	Q	124	136	13	2	12M(15.9949),6T(79.9663)	sp|P29692|EF1D_HUMAN	P29692	EF1D_HUMAN	EEF1D	Elongation factor 1-delta			3	3028558	MS/MS	STY:79.9663@AT(0.0703)APQT(0.8978)QHVS(0.0319)PMR;M:15.9949@ATAPQTQHVSPM(1.0000)R;
ATEDGEEDEVSAGEK	ATEDGEEDEVS[79.9663]AGEK	K	E	1425	1439	15	2	11S(79.9663)	sp|Q9BXW9|FACD2_HUMAN	Q9BXW9	FACD2_HUMAN	FANCD2	Fanconi anemia group D2 protein			1	4.16824e+06	MS/MS	STY:79.9663@AT(0.0508)EDGEEDEVS(0.9492)AGEK;
ATNESEDEIPQLVPIGK	ATNES[79.9663]EDEIPQLVPIGK	K	K	357	373	17	2,3	5S(79.9663)	sp|O76021|RL1D1_HUMAN	O76021	RL1D1_HUMAN	RSL1D1	Ribosomal L1 domain-containing protein 1			2	4.2693608E7	MS/MS	STY:79.9663@AT(0.1001)NES(0.8999)EDEIPQLVPIGK;
ATVTPSPVK	ATVTPS[79.9663]PVK	K	G	176	184	9	2	6S(79.9663)	sp|Q9H1E3|NUCKS_HUMAN	Q9H1E3	NUCKS_HUMAN	NUCKS1	Nuclear ubiquitous casein and cyclin-dependent kinase substrate 1			1	7.9235512E7	MS/MS	STY:79.9663@AT(0.0276)VT(0.0276)PS(0.9448)PVK;
ATVTPSPVK	ATVT[79.9663]PSPVK	K	G	176	184	9	2	4T(79.9663)	sp|Q9H1E3|NUCKS_HUMAN	Q9H1E3	NUCKS_HUMAN	NUCKS1	Nuclear ubiquitous casein and cyclin-dependent kinase substrate 1			1	7.9235512E7	MS/MS	STY:79.9663@AT(0.0395)VT(0.9307)PS(0.0298)PVK;
ATAPQTQHVSPMR	AT[79.9663]APQTQHVSPMR	R	Q	124	136	13	2	2T(79.9663)	sp|P29692|EF1D_HUMAN	P29692	EF1D_HUMAN	EEF1D	Elongation factor 1-delta			3	4.2136036E7	MS/MS	STY:79.9663@AT(0.9141)APQT(0.0430)QHVS(0.0430)PMR;
ATAPQTQHVSPMR	AT[79.9663]APQTQHVSPM[15.9949]R	R	Q	124	136	13	3	12M(15.9949),2T(79.9663)	sp|P29692|EF1D_HUMAN	P29692	EF1D_HUMAN	EEF1D	Elongation factor 1-delta			1	9645516	MS/MS	STY:79.9663@AT(0.8213)APQT(0.0254)QHVS(0.1533)PMR;M:15.9949@ATAPQTQHVSPM(1.0000)R;
ATEDGEEDEVSAGEK	AT[79.9663]EDGEEDEVSAGEK	K	E	1425	1439	15	2	2T(79.9663)	sp|Q9BXW9|FACD2_HUMAN	Q9BXW9	FACD2_HUMAN	FANCD2	Fanconi anemia group D2 protein			1	4.16824e+06	MS/MS	STY:79.9663@AT(0.5000)EDGEEDEVS(0.5000)AGEK;
ATNESEDEIPQLVPIGK	AT[79.9663]NESEDEIPQLVPIGK	K	K	357	373	17	2	2T(79.9663)	sp|O76021|RL1D1_HUMAN	O76021	RL1D1_HUMAN	RSL1D1	Ribosomal L1 domain-containing protein 1			1	3.7823088E7	MS/MS	STY:79.9663@AT(0.5000)NES(0.5000)EDEIPQLVPIGK;
ATSSTQSLAR	AT[79.9663]SSTQSLAR	R	L	1850	1859	10	2	2T(79.9663)	sp|Q14980|NUMA1_HUMAN	Q14980	NUMA1_HUMAN	NUMA1	Nuclear mitotic apparatus protein 1			1	5655990	MS/MS	STY:79.9663@AT(0.2488)S(0.2488)S(0.2488)T(0.2488)QS(0.0048)LAR;
ATVTPSPVK	AT[79.9663]VTPSPVK	K	G	176	184	9	2	2T(79.9663)	sp|Q9H1E3|NUCKS_HUMAN	Q9H1E3	NUCKS_HUMAN	NUCKS1	Nuclear ubiquitous casein and cyclin-dependent kinase substrate 1			4	7.9235512E7	MS/MS	STY:79.9663@AT(0.7594)VT(0.1203)PS(0.1203)PVK;
AVPMAPAPASPGSSNDSSAR	AVPMAPAPAS[79.9663]PGSSNDSSAR	K	S	750	769	20	2	10S(79.9663)	sp|Q66K74|MAP1S_HUMAN	Q66K74	MAP1S_HUMAN	MAP1S	Microtubule-associated protein 1S			1	2653119	MS/MS	STY:79.9663@AVPMAPAPAS(0.9042)PGS(0.0240)S(0.0240)NDS(0.0240)S(0.0240)AR;
AVPSPTTGEEGSVHSR	AVPS[79.9663]PTTGEEGSVHSR	R	E	1230	1245	16	2	4S(79.9663)	sp|Q5SYE7|NHSL1_HUMAN	Q5SYE7	NHSL1_HUMAN	NHSL1	NHS-like protein 1			1	0	MS/MS	STY:79.9663@AVPS(0.3064)PT(0.3064)T(0.3064)GEEGS(0.0404)VHS(0.0404)R;
AVTIANSPSKPSEK	AVTIANSPS[79.9663]KPSEK	K	D	197	210	14	2	9S(79.9663)	sp|Q8NEF9|SRFB1_HUMAN	Q8NEF9	SRFB1_HUMAN	SRFBP1	Serum response factor-binding protein 1			1	0	MS/MS	STY:79.9663@AVT(0.0116)IANS(0.0116)PS(0.4884)KPS(0.4884)EK;
AVTTVTQSTPVPGPSVPPPEELQVSPGPR	AVTTVTQSTPVPGPSVPPPEELQVS[79.9663]PGPR	R	Q	1483	1511	29	3	25S(79.9663)	sp|P51610|HCFC1_HUMAN	P51610	HCFC1_HUMAN	HCFC1	Host cell factor 1			1	5326300	MS/MS	STY:79.9663@AVT(0.0433)T(0.0433)VT(0.0433)QS(0.0244)T(0.0244)PVPGPS(0.0247)VPPPEELQVS(0.7965)PGPR;
AVVVSPKEENK	AVVVS[79.9663]PKEENK	R	A	336	346	11	2	5S(79.9663)	sp|O75909|CCNK_HUMAN	O75909	CCNK_HUMAN	CCNK	Cyclin-K			2	1.22938e+06	MS/MS	STY:79.9663@AVVVS(1.0000)PKEENK;
AYSFCGTVEYMAPEVVNR	AY[79.9663]SFC[57.0215]GTVEYMAPEVVNR	K	R	225	242	18	3	2Y(79.9663),5C(57.0215)	sp|P51812|KS6A3_HUMAN	P51812	KS6A3_HUMAN	RPS6KA3	Ribosomal protein S6 kinase alpha-3	RPS6KA1, RPS6KA6	sp|Q15418|KS6A1_HUMAN, sp|Q9UK32|KS6A6_HUMAN	1	1.31335e+06	MS/MS	STY:79.9663@AY(0.4826)S(0.4826)FCGT(0.0174)VEY(0.0174)MAPEVVNR;
CDSSPDSAEDVRK	C[57.0215]DS[79.9663]SPDSAEDVRK	K	V	132	144	13	2	1C(57.0215),3S(79.9663)	sp|P02765|FETUA_HUMAN	P02765	FETUA_HUMAN	AHSG	Alpha-2-HS-glycoprotein			2	2282276	MS/MS	STY:79.9663@CDS(0.4626)S(0.4626)PDS(0.0747)AEDVRK;
CGSGPVHISGQHLVAVEEDAESEDEEEEDVK	C[57.0215]GSGPVHISGQHLVAVEEDAES[79.9663]EDEEEEDVK	K	L	104	134	31	3,4	1C(57.0215),22S(79.9663)	sp|P06748|NPM_HUMAN	P06748	NPM_HUMAN	NPM1	Nucleophosmin			29	7.0036704E7	MS/MS	STY:79.9663@CGS(0.0261)GPVHIS(0.0261)GQHLVAVEEDAES(0.9478)EDEEEEDVK;
CGSGPVHISGQHLVAVEEDAESEDEEEEDVK	C[57.0215]GS[79.9663]GPVHISGQHLVAVEEDAESEDEEEEDVK	K	L	104	134	31	3	1C(57.0215),3S(79.9663)	sp|P06748|NPM_HUMAN	P06748	NPM_HUMAN	NPM1	Nucleophosmin			2	4.0115676E7	MS/MS	STY:79.9663@CGS(0.8744)GPVHIS(0.0260)GQHLVAVEEDAES(0.0996)EDEEEEDVK;
CSGPGLSPGMVR	C[57.0215]SGPGLS[79.9663]PGMVR	K	A	1453	1464	12	2	1C(57.0215),7S(79.9663)	sp|P21333|FLNA_HUMAN	P21333	FLNA_HUMAN	FLNA	Filamin-A			3	4.2455516E7	MS/MS	STY:79.9663@CS(0.0507)GPGLS(0.9493)PGMVR;
CSVSLSNVEAR	C[57.0215]SVSLS[79.9663]NVEAR	R	R	726	736	11	2	1C(57.0215),6S(79.9663)	sp|P47712|PA24A_HUMAN	P47712	PA24A_HUMAN	PLA2G4A	Cytosolic phospholipase A2			1	3.0125444E7	MS/MS	STY:79.9663@CS(0.0263)VS(0.0280)LS(0.9457)NVEAR;
CSVSLSNVEAR	C[57.0215]SVS[79.9663]LSNVEAR	R	R	726	736	11	2	1C(57.0215),4S(79.9663)	sp|P47712|PA24A_HUMAN	P47712	PA24A_HUMAN	PLA2G4A	Cytosolic phospholipase A2			1	3.0125444E7	MS/MS	STY:79.9663@CS(0.0197)VS(0.4901)LS(0.4901)NVEAR;
CSGPGLSPGMVR	C[57.0215]S[79.9663]GPGLSPGMVR	K	A	1453	1464	12	2	1C(57.0215),2S(79.9663)	sp|P21333|FLNA_HUMAN	P21333	FLNA_HUMAN	FLNA	Filamin-A			1	4.2455516E7	MS/MS	STY:79.9663@CS(0.5000)GPGLS(0.5000)PGMVR;
CSVSLSNVEAR	C[57.0215]S[79.9663]VSLSNVEAR	R	R	726	736	11	2	1C(57.0215),2S(79.9663)	sp|P47712|PA24A_HUMAN	P47712	PA24A_HUMAN	PLA2G4A	Cytosolic phospholipase A2			2	3.0125444E7	MS/MS	STY:79.9663@CS(0.9469)VS(0.0271)LS(0.0260)NVEAR;
DALGDSLQVPVSPSSTTSSR	DALGDSLQVPVS[79.9663]PSSTTSSR	R	C	372	391	20	2	12S(79.9663)	sp|Q9Y2D5|PLAK2_HUMAN	Q9Y2D5	PLAK2_HUMAN	PALM2AKAP2	PALM2-AKAP2 fusion protein			1	7.67482e+06	MS/MS	STY:79.9663@DALGDS(0.0083)LQVPVS(0.9348)PS(0.0075)S(0.0075)T(0.0105)T(0.0105)S(0.0105)S(0.0105)R;
DAQRLSPIPEEVPK	DAQRLS[79.9663]PIPEEVPK	K	S	599	612	14	2,3	6S(79.9663)	sp|Q96T23|RSF1_HUMAN	Q96T23	RSF1_HUMAN	RSF1	Remodeling and spacing factor 1			2	1.6517554E7	MS/MS	STY:79.9663@DAQRLS(1.0000)PIPEEVPK;
DASPINR	DAS[79.9663]PINR	K	W	429	435	7	2	3S(79.9663)	sp|Q13523|PRP4K_HUMAN	Q13523	PRP4K_HUMAN	PRP4K	Serine/threonine-protein kinase PRP4 homolog			1	2.02841e+06	MS/MS	STY:79.9663@DAS(1.0000)PINR;
DDDDIDLFGSDDEEESEEAK	DDDDIDLFGS[79.9663]DDEEESEEAK	K	R	97	116	20	2	10S(79.9663)	sp|P24534|EF1B_HUMAN	P24534	EF1B_HUMAN	EEF1B2	Elongation factor 1-beta			1	0	MS/MS	STY:79.9663@DDDDIDLFGS(0.9471)DDEEES(0.0529)EEAK;
DDQEWESPSPPKPTVFISGVIAR	DDQEWESPSPPKPT[79.9663]VFISGVIAR	K	G	43	65	23	3	14T(79.9663)	sp|P51397|DAP1_HUMAN	P51397	DAP1_HUMAN	DAP	Death-associated protein 1			1	4.65648e+06	MS/MS	STY:79.9663@DDQEWES(0.0848)PS(0.0735)PPKPT(0.7616)VFIS(0.0800)GVIAR;
DDQEWESPSPPKPTVFISGVIAR	DDQEWESPS[79.9663]PPKPTVFISGVIAR	K	G	43	65	23	3	9S(79.9663)	sp|P51397|DAP1_HUMAN	P51397	DAP1_HUMAN	DAP	Death-associated protein 1			1	4.65648e+06	MS/MS	STY:79.9663@DDQEWES(0.0722)PS(0.8850)PPKPT(0.0207)VFIS(0.0221)GVIAR;
DDQEWESPSPPKPTVFISGVIAR	DDQEWES[79.9663]PSPPKPTVFISGVIAR	K	G	43	65	23	3	7S(79.9663)	sp|P51397|DAP1_HUMAN	P51397	DAP1_HUMAN	DAP	Death-associated protein 1			3	1.2762861E7	MS/MS	STY:79.9663@DDQEWES(0.4676)PS(0.4676)PPKPT(0.0121)VFIS(0.0527)GVIAR;
DDSHSAEDSEDEK	DDS[79.9663]HSAEDSEDEK	K	E	71	83	13	2	3S(79.9663)	sp|Q9H1E3|NUCKS_HUMAN	Q9H1E3	NUCKS_HUMAN	NUCKS1	Nuclear ubiquitous casein and cyclin-dependent kinase substrate 1			1	0	MS/MS	STY:79.9663@DDS(0.3333)HS(0.3333)AEDS(0.3333)EDEK;
DEILPTTPISEQK	DEILPTTPIS[79.9663]EQK	K	G	215	227	13	2	10S(79.9663)	sp|P23396|RS3_HUMAN	P23396	RS3_HUMAN	RPS3	Small ribosomal subunit protein uS3			1	2.4628552E7	MS/MS	STY:79.9663@DEILPT(0.3050)T(0.3050)PIS(0.3901)EQK;
DELHIVEAEAMNYEGSPIK	DELHIVEAEAMNYEGS[79.9663]PIK	K	V	55	73	19	3	16S(79.9663)	sp|P06748|NPM_HUMAN	P06748	NPM_HUMAN	NPM1	Nucleophosmin			1	1.9575816E7	MS/MS	STY:79.9663@DELHIVEAEAMNY(0.0506)EGS(0.9494)PIK;
DELHIVEAEAMNYEGSPIK	DELHIVEAEAMNY[79.9663]EGSPIK	K	V	55	73	19	2,3	13Y(79.9663)	sp|P06748|NPM_HUMAN	P06748	NPM_HUMAN	NPM1	Nucleophosmin			3	3.1809628E7	MS/MS	STY:79.9663@DELHIVEAEAMNY(0.9097)EGS(0.0903)PIK;
DELTESPK	DELT[79.9663]ESPK	K	Y	229	236	8	2	4T(79.9663)	sp|Q8NC51|SERB1_HUMAN	Q8NC51	SERB1_HUMAN	SERBP1	SERPINE1 mRNA-binding protein 1			1	1965836	MS/MS	STY:79.9663@DELT(0.5000)ES(0.5000)PK;
DFQEYVEPGEDFPASPQRR	DFQEYVEPGEDFPAS[79.9663]PQRR	R	N	193	211	19	3	15S(79.9663)	sp|Q9Y6G9|DC1L1_HUMAN	Q9Y6G9	DC1L1_HUMAN	DYNC1LI1	Cytoplasmic dynein 1 light intermediate chain 1			1	2.81044e+06	MS/MS	STY:79.9663@DFQEY(0.1929)VEPGEDFPAS(0.8071)PQRR;
DGAVNGPSVVGDQTPIEPQTSIER	DGAVNGPSVVGDQTPIEPQT[79.9663]SIER	K	L	377	400	24	3	20T(79.9663)	sp|P49321|NASP_HUMAN	P49321	NASP_HUMAN	NASP	Nuclear autoantigenic sperm protein			1	0	MS/MS	STY:79.9663@DGAVNGPS(0.1537)VVGDQT(0.1537)PIEPQT(0.3463)S(0.3463)IER;
DGQDAIAQSPEK	DGQDAIAQS[79.9663]PEK	K	E	281	292	12	2	9S(79.9663)	sp|Q9NWH9|SLTM_HUMAN	Q9NWH9	SLTM_HUMAN	SLTM	SAFB-like transcription modulator			4	3.07114e+06	MS/MS	STY:79.9663@DGQDAIAQS(1.0000)PEK;
DGQVINETSQHHDDLE	DGQVINET[79.9663]SQHHDDLE	R	-	451	466	16	2,3	8T(79.9663)	sp|P08670|VIME_HUMAN	P08670	VIME_HUMAN	VIM	Vimentin			2	7.46736e+06	MS/MS	STY:79.9663@DGQVINET(0.5000)S(0.5000)QHHDDLE;
DGTAPPPQSPGSPGTGQDEEWSDEESPRK	DGTAPPPQSPGSPGTGQDEEWS[79.9663]DEESPRK	R	A	333	361	29	3	22S(79.9663)	sp|Q9UKS6|PACN3_HUMAN	Q9UKS6	PACN3_HUMAN	PACSIN3	Protein kinase C and casein kinase substrate in neurons protein 3			1	4565935	MS/MS	STY:79.9663@DGT(0.0154)APPPQS(0.1512)PGS(0.1771)PGT(0.1771)GQDEEWS(0.4567)DEES(0.0226)PRK;
DHSPTPSVFNSDEER	DHSPTPS[79.9663]VFNSDEER	R	Y	490	504	15	3	7S(79.9663)	sp|Q6UN15|FIP1_HUMAN	Q6UN15	FIP1_HUMAN	FIP1L1	Pre-mRNA 3'-end-processing factor FIP1			1	1.85711e+06	MS/MS	STY:79.9663@DHS(0.0189)PT(0.0171)PS(0.9074)VFNS(0.0566)DEER;
DHSPTPSVFNSDEER	DHS[79.9663]PTPSVFNSDEER	R	Y	490	504	15	2,3	3S(79.9663)	sp|Q6UN15|FIP1_HUMAN	Q6UN15	FIP1_HUMAN	FIP1L1	Pre-mRNA 3'-end-processing factor FIP1			2	5439630	MS/MS	STY:79.9663@DHS(0.9204)PT(0.0171)PS(0.0171)VFNS(0.0454)DEER;
DIDISSPEFK	DIDIS[79.9663]SPEFK	K	I	172	181	10	2	5S(79.9663)	sp|Q09666|AHNK_HUMAN	Q09666	AHNK_HUMAN	AHNAK	Neuroblast differentiation-associated protein AHNAK			3	0	MS/MS	STY:79.9663@DIDIS(0.5000)S(0.5000)PEFK;
DISGPSPSK	DISGPS[79.9663]PSK	K	K	82	90	9	2	6S(79.9663)	sp|Q96GX9|MTNB_HUMAN	Q96GX9	MTNB_HUMAN	APIP	Methylthioribulose-1-phosphate dehydratase			2	5805582	MS/MS	STY:79.9663@DIS(0.0161)GPS(0.4919)PS(0.4919)K;
DISGPSPSKK	DIS[79.9663]GPSPSKK	K	L	82	91	10	2	3S(79.9663)	sp|Q96GX9|MTNB_HUMAN	Q96GX9	MTNB_HUMAN	APIP	Methylthioribulose-1-phosphate dehydratase			1	0	MS/MS	STY:79.9663@DIS(0.3333)GPS(0.3333)PS(0.3333)KK;
DKDDQEWESPSPPKPTVFISGVIAR	DKDDQEWESPSPPKPT[79.9663]VFISGVIAR	K	G	41	65	25	3	16T(79.9663)	sp|P51397|DAP1_HUMAN	P51397	DAP1_HUMAN	DAP	Death-associated protein 1			1	3.40797e+06	MS/MS	STY:79.9663@DKDDQEWES(0.0260)PS(0.0260)PPKPT(0.6731)VFIS(0.2748)GVIAR;
DKDDQEWESPSPPKPTVFISGVIAR	DKDDQEWESPS[79.9663]PPKPTVFISGVIAR	K	G	41	65	25	3	11S(79.9663)	sp|P51397|DAP1_HUMAN	P51397	DAP1_HUMAN	DAP	Death-associated protein 1			3	2.9272384E7	MS/MS	STY:79.9663@DKDDQEWES(0.0175)PS(0.9398)PPKPT(0.0203)VFIS(0.0223)GVIAR;
DKDDQEWESPSPPKPTVFISGVIAR	DKDDQEWES[79.9663]PSPPKPTVFISGVIAR	K	G	41	65	25	3	9S(79.9663)	sp|P51397|DAP1_HUMAN	P51397	DAP1_HUMAN	DAP	Death-associated protein 1			2	2.9272384E7	MS/MS	STY:79.9663@DKDDQEWES(0.4824)PS(0.4824)PPKPT(0.0210)VFIS(0.0143)GVIAR;
DKEVSDDEAEEK	DKEVS[79.9663]DDEAEEK	R	E	227	238	12	2,3	5S(79.9663)	sp|P07900|HS90A_HUMAN	P07900	HS90A_HUMAN	HSP90AA1	Heat shock protein HSP 90-alpha			8	3.0330096E7	MS/MS	STY:79.9663@DKEVS(1.0000)DDEAEEK;
DKSPVREPIDNLTPEER	DKSPVREPIDNLT[79.9663]PEER	K	D	134	150	17	2	13T(79.9663)	sp|Q14498|RBM39_HUMAN	Q14498	RBM39_HUMAN	RBM39	RNA-binding protein 39			2	6.56425e+06	MS/MS	STY:79.9663@DKS(0.0905)PVREPIDNLT(0.9095)PEER;
DKSPVREPIDNLTPEER	DKS[79.9663]PVREPIDNLTPEER	K	D	134	150	17	3	3S(79.9663)	sp|Q14498|RBM39_HUMAN	Q14498	RBM39_HUMAN	RBM39	RNA-binding protein 39			8	4.6122624E7	MS/MS	STY:79.9663@DKS(0.9495)PVREPIDNLT(0.0505)PEER;
DLDEEGSEK	DLDEEGS[79.9663]EK	K	E	573	581	9	2	7S(79.9663)	sp|O43719|HTSF1_HUMAN	O43719	HTSF1_HUMAN	HTATSF1	17S U2 SnRNP complex component HTATSF1			3	1.0997618E7	MS/MS	STY:79.9663@DLDEEGS(1.0000)EK;
DLFDLNSSEEDDTEGFSER	DLFDLNS[79.9663]S[79.9663]EEDDTEGFSER	K	G	666	684	19	2	7S(79.9663),8S(79.9663)	sp|Q9Y3T9|NOC2L_HUMAN	Q9Y3T9	NOC2L_HUMAN	NOC2L	Nucleolar complex protein 2 homolog			1	0	MS/MS	STY:79.9663@DLFDLNS(0.5000)S(0.5000)EEDDT(0.5000)EGFS(0.5000)ER;
DLFDYSPPLHK	DLFDYS[79.9663]PPLHK	K	N	507	517	11	2	6S(79.9663)	sp|Q9NYF8|BCLF1_HUMAN	Q9NYF8	BCLF1_HUMAN	BCLAF1	Bcl-2-associated transcription factor 1			2	3.0369804E7	MS/MS	STY:79.9663@DLFDY(0.0511)S(0.9489)PPLHK;
DLFDYSPPLHK	DLFDY[79.9663]SPPLHK	K	N	507	517	11	2,3	5Y(79.9663)	sp|Q9NYF8|BCLF1_HUMAN	Q9NYF8	BCLF1_HUMAN	BCLAF1	Bcl-2-associated transcription factor 1			8	3.4538176E7	MS/MS	STY:79.9663@DLFDY(0.9483)S(0.0517)PPLHK;
DLLHPSPEEEK	DLLHPS[79.9663]PEEEK	K	R	6	16	11	2	6S(79.9663)	sp|P42677|RS27_HUMAN	P42677	RS27_HUMAN	RPS27	Small ribosomal subunit protein eS27			2	1.40077e+06	MS/MS	STY:79.9663@DLLHPS(1.0000)PEEEK;
DLVQPDKPASPK	DLVQPDKPAS[79.9663]PK	R	F	506	517	12	2	10S(79.9663)	sp|Q6PJT7|ZC3HE_HUMAN	Q6PJT7	ZC3HE_HUMAN	ZC3H14	Zinc finger CCCH domain-containing protein 14			1	6.19654e+06	MS/MS	STY:79.9663@DLVQPDKPAS(1.0000)PK;
DNTFFRESPVGR	DNTFFRES[79.9663]PVGR	R	K	126	137	12	2	8S(79.9663)	sp|Q8NEY8|PPHLN_HUMAN	Q8NEY8	PPHLN_HUMAN	PPHLN1	Periphilin-1			1	5332297	MS/MS	STY:79.9663@DNT(0.0510)FFRES(0.9490)PVGR;
DPAQPMSPGEATQSGAR	DPAQPMSPGEAT[79.9663]QSGAR	R	P	5	21	17	2	12T(79.9663)	sp|Q9BQG0|MBB1A_HUMAN	Q9BQG0	MBB1A_HUMAN	MYBBP1A	Myb-binding protein 1A			1	7.31638e+06	MS/MS	STY:79.9663@DPAQPMS(0.0564)PGEAT(0.4718)QS(0.4718)GAR;
DPAQPMSPGEATQSGAR	DPAQPMS[79.9663]PGEATQSGAR	R	P	5	21	17	2	7S(79.9663)	sp|Q9BQG0|MBB1A_HUMAN	Q9BQG0	MBB1A_HUMAN	MYBBP1A	Myb-binding protein 1A			4	1.0835268E7	MS/MS	STY:79.9663@DPAQPMS(0.9479)PGEAT(0.0260)QS(0.0260)GAR;
DPSSGQEVATPPVPQLQVCEPK	DPS[79.9663]SGQEVATPPVPQLQVC[57.0215]EPK	K	E	673	694	22	3	19C(57.0215),3S(79.9663)	sp|Q9UKV3|ACINU_HUMAN	Q9UKV3	ACINU_HUMAN	ACIN1	Apoptotic chromatin condensation inducer in the nucleus			1	1.34747e+06	MS/MS	STY:79.9663@DPS(0.3333)S(0.3333)GQEVAT(0.3333)PPVPQLQVCEPK;
DPVSPASQK	DPVSPAS[79.9663]QK	K	M	1098	1106	9	2	7S(79.9663)	sp|Q12888|TP53B_HUMAN	Q12888	TP53B_HUMAN	TP53BP1	TP53-binding protein 1			1	1.050471E7	MS/MS	STY:79.9663@DPVS(0.0627)PAS(0.9373)QK;
DPVSPASQK	DPVS[79.9663]PASQK	K	M	1098	1106	9	2	4S(79.9663)	sp|Q12888|TP53B_HUMAN	Q12888	TP53B_HUMAN	TP53BP1	TP53-binding protein 1			1	2.43848e+06	MS/MS	STY:79.9663@DPVS(0.9353)PAS(0.0647)QK;
DQDMSSPTTMK	DQDMSSPT[79.9663]TMK	R	K	307	317	11	2	8T(79.9663)	sp|O00712|NFIB_HUMAN	O00712	NFIB_HUMAN	NFIB	Nuclear factor 1 B-type			1	2.2104e+06	MS/MS	STY:79.9663@DQDMS(0.0136)S(0.0136)PT(0.4864)T(0.4864)MK;
DQDMSSPTTMK	DQDMS[79.9663]SPTTMK	R	K	307	317	11	2	5S(79.9663)	sp|O00712|NFIB_HUMAN	O00712	NFIB_HUMAN	NFIB	Nuclear factor 1 B-type			1	0	MS/MS	STY:79.9663@DQDMS(0.2500)S(0.2500)PT(0.2500)T(0.2500)MK;
DQSPFSK	DQS[79.9663]PFSK	R	I	685	691	7	2	3S(79.9663)	sp|Q13427|PPIG_HUMAN	Q13427	PPIG_HUMAN	PPIG	Peptidyl-prolyl cis-trans isomerase G			1	0	MS/MS	STY:79.9663@DQS(0.9494)PFS(0.0506)K;
DRASPAAAEEVVPEWASCLK	DRAS[79.9663]PAAAEEVVPEWASC[57.0215]LK	R	S	682	701	20	3	18C(57.0215),4S(79.9663)	sp|Q8N3V7|SYNPO_HUMAN	Q8N3V7	SYNPO_HUMAN	SYNPO	Synaptopodin			1	0	MS/MS	STY:79.9663@DRAS(0.9474)PAAAEEVVPEWAS(0.0526)CLK;
DRQSPPPAK	DRQS[79.9663]PPPAK	K	R	839	847	9	2	4S(79.9663)	sp|Q86VM9|ZCH18_HUMAN	Q86VM9	ZCH18_HUMAN	ZC3H18	Zinc finger CCCH domain-containing protein 18			1	2476320	MS/MS	STY:79.9663@DRQS(1.0000)PPPAK;
DSAIPVESDTDDEGAPR	DSAIPVES[79.9663]DTDDEGAPR	R	I	461	477	17	2	8S(79.9663)	sp|Q96D46|NMD3_HUMAN	Q96D46	NMD3_HUMAN	NMD3	60S ribosomal export protein NMD3			1	0	MS/MS	STY:79.9663@DS(0.0376)AIPVES(0.9294)DT(0.0329)DDEGAPR;
DSSFTEVPRSPK	DSSFTEVPRS[79.9663]PK	R	H	236	247	12	2	10S(79.9663)	sp|O95425|SVIL_HUMAN	O95425	SVIL_HUMAN	SVIL	Supervillin			1	2.92208e+06	MS/MS	STY:79.9663@DS(0.2713)S(0.2713)FT(0.0093)EVPRS(0.4481)PK;
DSSFTEVPRSPK	DSSFT[79.9663]EVPRSPK	R	H	236	247	12	2	5T(79.9663)	sp|O95425|SVIL_HUMAN	O95425	SVIL_HUMAN	SVIL	Supervillin			1	2.92208e+06	MS/MS	STY:79.9663@DS(0.0382)S(0.0175)FT(0.9118)EVPRS(0.0325)PK;
DSGSQVEEDTSCSDSK	DS[79.9663]GSQVEEDTSC[57.0215]SDSK	K	T	751	766	16	2	12C(57.0215),2S(79.9663)	sp|Q08499|PDE4D_HUMAN	Q08499	PDE4D_HUMAN	PDE4D	3',5'-cyclic-AMP phosphodiesterase 4D			1	0	MS/MS	STY:79.9663@DS(0.4826)GS(0.4826)QVEEDT(0.0087)S(0.0087)CS(0.0087)DS(0.0087)K;
DTSENADGQSDENK	DTSENADGQS[79.9663]DENK	K	D	757	770	14	2	10S(79.9663)	sp|P43243|MATR3_HUMAN	P43243	MATR3_HUMAN	MATR3	Matrin-3			2	2111858	MS/MS	STY:79.9663@DT(0.0301)S(0.0301)ENADGQS(0.9398)DENK;
DTSPSSGSAVSSSK	DT[79.9663]SPSSGSAVSSSK	R	V	203	216	14	2	2T(79.9663)	sp|Q8NEY8|PPHLN_HUMAN	Q8NEY8	PPHLN_HUMAN	PPHLN1	Periphilin-1			1	0	MS/MS	STY:79.9663@DT(0.1250)S(0.1250)PS(0.1250)S(0.1250)GS(0.1250)AVS(0.1250)S(0.1250)S(0.1250)K;
DVTPPPETEVVLIK	DVT[79.9663]PPPETEVVLIK	K	N	519	532	14	2	3T(79.9663)	sp|P27816|MAP4_HUMAN	P27816	MAP4_HUMAN	MAP4	Microtubule-associated protein 4			3	1.3354528E7	MS/MS	STY:79.9663@DVT(0.9481)PPPET(0.0519)EVVLIK;
DVYLSPR	DVYLS[79.9663]PR	R	D	204	210	7	2	5S(79.9663)	sp|P38159|RBMX_HUMAN	P38159	RBMX_HUMAN	RBMX	RNA-binding motif protein, X chromosome	RBMXL1	sp|Q96E39|RMXL1_HUMAN	1	1.4271974E7	MS/MS	STY:79.9663@DVY(0.0505)LS(0.9495)PR;
DVYLSPR	DVY[79.9663]LSPR	R	D	204	210	7	2	3Y(79.9663)	sp|P38159|RBMX_HUMAN	P38159	RBMX_HUMAN	RBMX	RNA-binding motif protein, X chromosome	RBMXL1	sp|Q96E39|RMXL1_HUMAN	1	1.4271974E7	MS/MS	STY:79.9663@DVY(0.5000)LS(0.5000)PR;
DWEDDSDEDMSNFDR	DWEDDS[79.9663]DEDMSNFDR	K	F	108	122	15	2,3	6S(79.9663)	sp|Q15185|TEBP_HUMAN	Q15185	TEBP_HUMAN	PTGES3	Prostaglandin E synthase 3			4	9.1446784E7	MS/MS	STY:79.9663@DWEDDS(0.9492)DEDMS(0.0508)NFDR;
DWEDDSDEDMSNFDR	DWEDDS[79.9663]DEDM[15.9949]SNFDR	K	F	108	122	15	2	10M(15.9949),6S(79.9663)	sp|Q15185|TEBP_HUMAN	Q15185	TEBP_HUMAN	PTGES3	Prostaglandin E synthase 3			2	0	MS/MS	STY:79.9663@DWEDDS(0.9495)DEDMS(0.0505)NFDR;M:15.9949@DWEDDSDEDM(1.0000)SNFDR;
DWQSGRALGALVDSCAPGLCPDWDSWDASK	DWQS[79.9663]GRALGALVDS[79.9663]C[57.0215]APGLC[57.0215]PDWDSWDASK	R	P	191	220	30	4	14S(79.9663),15C(57.0215),20C(57.0215),4S(79.9663)	sp|P21333|FLNA_HUMAN	P21333	FLNA_HUMAN	FLNA	Filamin-A			1	0	MS/MS	STY:79.9663@DWQS(0.9134)GRALGALVDS(0.9131)CAPGLCPDWDS(0.0998)WDAS(0.0737)K;
DYDDMSPR	DYDDMS[79.9663]PR	R	R	279	286	8	2	6S(79.9663)	sp|P61978|HNRPK_HUMAN	P61978	HNRPK_HUMAN	HNRNPK	Heterogeneous nuclear ribonucleoprotein K			3	1.050472E7	MS/MS	STY:79.9663@DY(0.0504)DDMS(0.9496)PR;
DYEIESQNPLASPTNTLLGSAK	DYEIESQNPLASPTNTLLGS[79.9663]AK	K	E	618	639	22	3	20S(79.9663)	sp|Q7Z417|NUFP2_HUMAN	Q7Z417	NUFP2_HUMAN	NUFIP2	FMR1-interacting protein NUFIP2			1	2.70214e+06	MS/MS	STY:79.9663@DY(0.1247)EIES(0.1247)QNPLAS(0.0095)PT(0.0095)NT(0.0099)LLGS(0.7216)AK;
DYEIESQNPLASPTNTLLGSAK	DYEIESQNPLAS[79.9663]PTNTLLGSAK	K	E	618	639	22	3	12S(79.9663)	sp|Q7Z417|NUFP2_HUMAN	Q7Z417	NUFP2_HUMAN	NUFIP2	FMR1-interacting protein NUFIP2			1	2.70214e+06	MS/MS	STY:79.9663@DY(0.0265)EIES(0.1155)QNPLAS(0.7870)PT(0.0099)NT(0.0462)LLGS(0.0148)AK;
DYDDMSPR	DY[79.9663]DDMSPR	R	R	279	286	8	2	2Y(79.9663)	sp|P61978|HNRPK_HUMAN	P61978	HNRPK_HUMAN	HNRNPK	Heterogeneous nuclear ribonucleoprotein K			1	5.03629e+06	MS/MS	STY:79.9663@DY(0.9456)DDMS(0.0544)PR;
EAEEESSGGEEEDEDENIEVVYSK	EAEEES[79.9663]S[79.9663]GGEEEDEDENIEVVYSK	K	A	384	407	24	3	6S(79.9663),7S(79.9663)	sp|P55010|IF5_HUMAN	P55010	IF5_HUMAN	EIF5	Eukaryotic translation initiation factor 5			1	0	MS/MS	STY:79.9663@EAEEES(0.7294)S(0.7294)GGEEEDEDENIEVVY(0.2706)S(0.2706)K;
EAEEGEDDRDSANGEDDS	EAEEGEDDRDSANGEDDS[79.9663]	K	-	289	306	18	2	18S(79.9663)	sp|P07910|HNRPC_HUMAN	P07910	HNRPC_HUMAN	HNRNPC	Heterogeneous nuclear ribonucleoproteins C1/C2			1	2.5882808E7	MS/MS	STY:79.9663@EAEEGEDDRDS(0.4174)ANGEDDS(0.5826);
EAEEGEDDRDSANGEDDS	EAEEGEDDRDS[79.9663]ANGEDDS	K	-	289	306	18	2	11S(79.9663)	sp|P07910|HNRPC_HUMAN	P07910	HNRPC_HUMAN	HNRNPC	Heterogeneous nuclear ribonucleoproteins C1/C2			12	5.1880844E7	MS/MS	STY:79.9663@EAEEGEDDRDS(0.9447)ANGEDDS(0.0553);
EAESCDCLQGFQLTHSLGGGTGSGMGTLLISK	EAESC[57.0215]DC[57.0215]LQGFQLTHSLGGGT[79.9663]GSGMGTLLISK	K	I	123	154	32	3	21T(79.9663),5C(57.0215),7C(57.0215)	sp|P07437|TBB5_HUMAN	P07437	TBB5_HUMAN	TUBB	Tubulin beta chain	TUBB4A, TUBB4B, TUBB8, TUBB8B	sp|A6NNZ2|TBB8B_HUMAN, sp|P04350|TBB4A_HUMAN, sp|P68371|TBB4B_HUMAN, sp|Q3ZCM7|TBB8_HUMAN	1	0	MS/MS	STY:79.9663@EAES(0.0819)CDCLQGFQLT(0.0607)HS(0.0607)LGGGT(0.7621)GS(0.0091)GMGT(0.0127)LLIS(0.0127)K;
EAESCDCLQGFQLTHSLGGGTGSGMGTLLISK	EAES[79.9663]C[57.0215]DC[57.0215]LQGFQLTHSLGGGTGSGMGTLLISK	K	I	123	154	32	3	4S(79.9663),5C(57.0215),7C(57.0215)	sp|P07437|TBB5_HUMAN	P07437	TBB5_HUMAN	TUBB	Tubulin beta chain	TUBB4A, TUBB4B, TUBB8, TUBB8B	sp|A6NNZ2|TBB8B_HUMAN, sp|P04350|TBB4A_HUMAN, sp|P68371|TBB4B_HUMAN, sp|Q3ZCM7|TBB8_HUMAN	1	0	MS/MS	STY:79.9663@EAES(0.3542)CDCLQGFQLT(0.1006)HS(0.0548)LGGGT(0.0417)GS(0.1346)GMGT(0.1768)LLIS(0.1373)K;
EAPAEGEAAEPGSPTAAEGEAASAASSTSSPK	EAPAEGEAAEPGSPTAAEGEAASAASST[79.9663]SSPK	K	A	106	137	32	3	28T(79.9663)	sp|P29966|MARCS_HUMAN	P29966	MARCS_HUMAN	MARCKS	Myristoylated alanine-rich C-kinase substrate			1	2.1218862E7	MS/MS	STY:79.9663@EAPAEGEAAEPGS(0.1564)PT(0.1289)AAEGEAAS(0.1531)AAS(0.0046)S(0.0046)T(0.5391)S(0.0067)S(0.0067)PK;
EAPAEGEAAEPGSPTAAEGEAASAASSTSSPK	EAPAEGEAAEPGSPT[79.9663]AAEGEAASAASSTSSPK	K	A	106	137	32	3	15T(79.9663)	sp|P29966|MARCS_HUMAN	P29966	MARCS_HUMAN	MARCKS	Myristoylated alanine-rich C-kinase substrate			1	2.1218862E7	MS/MS	STY:79.9663@EAPAEGEAAEPGS(0.3313)PT(0.5538)AAEGEAAS(0.0152)AAS(0.0199)S(0.0199)T(0.0199)S(0.0199)S(0.0199)PK;
EAPAEGEAAEPGSPTAAEGEAASAASSTSSPK	EAPAEGEAAEPGS[79.9663]PTAAEGEAASAASSTSSPK	K	A	106	137	32	3	13S(79.9663)	sp|P29966|MARCS_HUMAN	P29966	MARCS_HUMAN	MARCKS	Myristoylated alanine-rich C-kinase substrate			4	2.1218862E7	MS/MS	STY:79.9663@EAPAEGEAAEPGS(0.4777)PT(0.4777)AAEGEAAS(0.0075)AAS(0.0074)S(0.0074)T(0.0074)S(0.0074)S(0.0074)PK;
EATNTTSEPSAPSQDLLDLSPSPR	EATNTTSEPSAPSQDLLDLS[79.9663]PSPR	K	M	302	325	24	3	20S(79.9663)	sp|O75674|TM1L1_HUMAN	O75674	TM1L1_HUMAN	TOM1L1	TOM1-like protein 1			1	0	MS/MS	STY:79.9663@EAT(0.0109)NT(0.0109)T(0.0109)S(0.0058)EPS(0.0092)APS(0.0498)QDLLDLS(0.6172)PS(0.2852)PR;
EATVPCTEILTEK	EAT[79.9663]VPC[57.0215]TEILTEK	K	K	350	362	13	3	3T(79.9663),6C(57.0215)	sp|Q96PC5|MIA2_HUMAN	Q96PC5	MIA2_HUMAN	MIA2	Melanoma inhibitory activity protein 2			1	0	MS/MS	STY:79.9663@EAT(0.4907)VPCT(0.4907)EILT(0.0186)EK;
EAYSGCSGPVDSECPPPPSSPVHK	EAYSGC[57.0215]SGPVDSEC[57.0215]PPPPS[79.9663]SPVHK	K	A	246	269	24	3	14C(57.0215),19S(79.9663),6C(57.0215)	sp|Q8N556|AFAP1_HUMAN	Q8N556	AFAP1_HUMAN	AFAP1	Actin filament-associated protein 1			1	1.41083e+06	MS/MS	STY:79.9663@EAY(0.0130)S(0.0130)GCS(0.0130)GPVDS(0.0144)ECPPPPS(0.4733)S(0.4733)PVHK;
EAYSGCSGPVDSECPPPPSSPVHK	EAY[79.9663]SGC[57.0215]SGPVDSEC[57.0215]PPPPSSPVHK	K	A	246	269	24	3	14C(57.0215),3Y(79.9663),6C(57.0215)	sp|Q8N556|AFAP1_HUMAN	Q8N556	AFAP1_HUMAN	AFAP1	Actin filament-associated protein 1			1	6.63203e+06	MS/MS	STY:79.9663@EAY(0.2274)S(0.2274)GCS(0.2274)GPVDS(0.2274)ECPPPPS(0.0451)S(0.0451)PVHK;
EDEISPPPPNPVVK	EDEIS[79.9663]PPPPNPVVK	R	G	79	92	14	2	5S(79.9663)	sp|P10644|KAP0_HUMAN	P10644	KAP0_HUMAN	PRKAR1A	cAMP-dependent protein kinase type I-alpha regulatory subunit			3	8330799	MS/MS	STY:79.9663@EDEIS(1.0000)PPPPNPVVK;
EDILENEDEQNSPPKK	EDILENEDEQNS[79.9663]PPKK	K	G	1272	1287	16	2,3	12S(79.9663)	sp|Q9NTI5|PDS5B_HUMAN	Q9NTI5	PDS5B_HUMAN	PDS5B	Sister chromatid cohesion protein PDS5 homolog B			4	3.47093e+06	MS/MS	STY:79.9663@EDILENEDEQNS(1.0000)PPKK;
EDKPPLAPSGGTEGPEQPPPPCPSQTGSPPVGLIK	EDKPPLAPSGGTEGPEQPPPPC[57.0215]PSQT[79.9663]GSPPVGLIK	K	G	607	641	35	3	22C(57.0215),26T(79.9663)	sp|Q8WWM7|ATX2L_HUMAN	Q8WWM7	ATX2L_HUMAN	ATXN2L	Ataxin-2-like protein			1	6908534	MS/MS	STY:79.9663@EDKPPLAPS(0.1652)GGT(0.0164)EGPEQPPPPCPS(0.0128)QT(0.7893)GS(0.0162)PPVGLIK;
EDKPPLAPSGGTEGPEQPPPPCPSQTGSPPVGLIK	EDKPPLAPSGGTEGPEQPPPPC[57.0215]PS[79.9663]QTGSPPVGLIK	K	G	607	641	35	3,4	22C(57.0215),24S(79.9663)	sp|Q8WWM7|ATX2L_HUMAN	Q8WWM7	ATX2L_HUMAN	ATXN2L	Ataxin-2-like protein			3	6908534	MS/MS	STY:79.9663@EDKPPLAPS(0.0134)GGT(0.0138)EGPEQPPPPCPS(0.4800)QT(0.4800)GS(0.0129)PPVGLIK;
EDSGTFSLGK	EDS[79.9663]GTFSLGK	R	M	16	25	10	2	3S(79.9663)	sp|O75569|PRKRA_HUMAN	O75569	PRKRA_HUMAN	PRKRA	Interferon-inducible double-stranded RNA-dependent protein kinase activator A			1	2.97637e+06	MS/MS	STY:79.9663@EDS(0.3333)GT(0.3333)FS(0.3333)LGK;
EEAPASPLRPLYPQISPLK	EEAPASPLRPLY[79.9663]PQISPLK	K	I	208	226	19	3	12Y(79.9663)	sp|P85037|FOXK1_HUMAN	P85037	FOXK1_HUMAN	FOXK1	Forkhead box protein K1			1	2.33053e+06	MS/MS	STY:79.9663@EEAPAS(0.3613)PLRPLY(0.3747)PQIS(0.2640)PLK;
EEAPASPLRPLYPQISPLK	EEAPAS[79.9663]PLRPLYPQISPLK	K	I	208	226	19	3	6S(79.9663)	sp|P85037|FOXK1_HUMAN	P85037	FOXK1_HUMAN	FOXK1	Forkhead box protein K1			1	3.54357e+06	MS/MS	STY:79.9663@EEAPAS(0.4396)PLRPLY(0.4011)PQIS(0.1593)PLK;
EEASDDDMEGDEAVVR	EEAS[79.9663]DDDMEGDEAVVR	R	C	222	237	16	2	4S(79.9663)	sp|O75643|U520_HUMAN	O75643	U520_HUMAN	SNRNP200	U5 small nuclear ribonucleoprotein 200 kDa helicase			2	0	MS/MS	STY:79.9663@EEAS(1.0000)DDDMEGDEAVVR;
EEDCHSPTSKPPKPDQPLK	EEDC[57.0215]HS[79.9663]PTSKPPKPDQPLK	K	V	454	472	19	3	4C(57.0215),6S(79.9663)	sp|P23588|IF4B_HUMAN	P23588	IF4B_HUMAN	EIF4B	Eukaryotic translation initiation factor 4B			2	4112541	MS/MS	STY:79.9663@EEDCHS(0.3333)PT(0.3333)S(0.3333)KPPKPDQPLK;
EEDEEPESPPEK	EEDEEPES[79.9663]PPEK	K	K	207	218	12	2	8S(79.9663)	sp|Q9H1E3|NUCKS_HUMAN	Q9H1E3	NUCKS_HUMAN	NUCKS1	Nuclear ubiquitous casein and cyclin-dependent kinase substrate 1			20	4.7866508E7	MS/MS	STY:79.9663@EEDEEPES(1.0000)PPEK;
EEDEEPESPPEKK	EEDEEPES[79.9663]PPEKK	K	T	207	219	13	2	8S(79.9663)	sp|Q9H1E3|NUCKS_HUMAN	Q9H1E3	NUCKS_HUMAN	NUCKS1	Nuclear ubiquitous casein and cyclin-dependent kinase substrate 1			3	705605	MS/MS	STY:79.9663@EEDEEPES(1.0000)PPEKK;
EEDEPEERSGDETPGSEVPGDK	EEDEPEERS[79.9663]GDETPGSEVPGDK	R	A	153	174	22	3	9S(79.9663)	sp|Q1KMD3|HNRL2_HUMAN	Q1KMD3	HNRL2_HUMAN	HNRNPUL2	Heterogeneous nuclear ribonucleoprotein U-like protein 2			2	6470939	MS/MS	STY:79.9663@EEDEPEERS(0.8014)GDET(0.1711)PGS(0.0275)EVPGDK;
EEEEGISQESSEEEQ	EEEEGISQES[79.9663]S[79.9663]EEEQ	K	-	93	107	15	2	10S(79.9663),11S(79.9663)	sp|P17096|HMGA1_HUMAN	P17096	HMGA1_HUMAN	HMGA1	High mobility group protein HMG-I/HMG-Y			1	0	MS/MS	STY:79.9663@EEEEGIS(0.0993)QES(0.9503)S(0.9503)EEEQ;
EEETSIDVAGKPNEVTK	EEETSIDVAGKPNEVT[79.9663]K	K	A	463	479	17	3	16T(79.9663)	sp|P53985|MOT1_HUMAN	P53985	MOT1_HUMAN	SLC16A1	Monocarboxylate transporter 1			1	4220709	MS/MS	STY:79.9663@EEET(0.1000)S(0.1000)IDVAGKPNEVT(0.8001)K;
EEGPPPPSPDGASSDAEPEPPSGR	EEGPPPPSPDGASS[79.9663]DAEPEPPSGR	R	T	15	38	24	3	14S(79.9663)	sp|Q9NTJ3|SMC4_HUMAN	Q9NTJ3	SMC4_HUMAN	SMC4	Structural maintenance of chromosomes protein 4			1	0	MS/MS	STY:79.9663@EEGPPPPS(0.0609)PDGAS(0.0609)S(0.8617)DAEPEPPS(0.0164)GR;
EEGSLSDTEADAVSGQLPDPTTNPSAGK	EEGS[79.9663]LSDTEADAVSGQLPDPTTNPSAGK	K	D	515	542	28	3	4S(79.9663)	sp|Q8N1G4|LRC47_HUMAN	Q8N1G4	LRC47_HUMAN	LRRC47	Leucine-rich repeat-containing protein 47			1	1.6136358E7	MS/MS	STY:79.9663@EEGS(0.3206)LS(0.3206)DT(0.3206)EADAVS(0.0190)GQLPDPT(0.0063)T(0.0063)NPS(0.0067)AGK;
EELMSSDLEETAGSTSIPK	EELMSSDLEETAGST[79.9663]SIPK	K	R	515	533	19	2	15T(79.9663)	sp|O00567|NOP56_HUMAN	O00567	NOP56_HUMAN	NOP56	Nucleolar protein 56			1	1.3251352E7	MS/MS	STY:79.9663@EELMS(0.0079)S(0.0079)DLEET(0.0079)AGS(0.0079)T(0.4842)S(0.4842)IPK;
EELMSSDLEETAGSTSIPK	EELMSSDLEET[79.9663]AGSTSIPK	K	R	515	533	19	3	11T(79.9663)	sp|O00567|NOP56_HUMAN	O00567	NOP56_HUMAN	NOP56	Nucleolar protein 56			1	3982354	MS/MS	STY:79.9663@EELMS(0.0389)S(0.0389)DLEET(0.2306)AGS(0.2306)T(0.2306)S(0.2306)IPK;
EELMSSDLEETAGSTSIPK	EELMSS[79.9663]DLEETAGSTSIPK	K	R	515	533	19	3	6S(79.9663)	sp|O00567|NOP56_HUMAN	O00567	NOP56_HUMAN	NOP56	Nucleolar protein 56			1	0	MS/MS	STY:79.9663@EELMS(0.0111)S(0.9364)DLEET(0.0105)AGS(0.0139)T(0.0142)S(0.0139)IPK;
EELMSSDLEETAGSTSIPK	EELMS[79.9663]SDLEETAGSTSIPK	K	R	515	533	19	2	5S(79.9663)	sp|O00567|NOP56_HUMAN	O00567	NOP56_HUMAN	NOP56	Nucleolar protein 56			1	1.3251352E7	MS/MS	STY:79.9663@EELMS(0.2972)S(0.2972)DLEET(0.2335)AGS(0.0574)T(0.0574)S(0.0574)IPK;
EELTPGAPQHQLPPVPGSPEPYPGQQAPGPEPSQPLLELTPR	EELTPGAPQHQLPPVPGS[79.9663]PEPYPGQQAPGPEPSQPLLELTPR	K	A	143	184	42	4	18S(79.9663)	sp|Q9H6F5|CCD86_HUMAN	Q9H6F5	CCD86_HUMAN	CCDC86	Coiled-coil domain-containing protein 86			2	1.5481134E7	MS/MS	STY:79.9663@EELT(0.0137)PGAPQHQLPPVPGS(0.9130)PEPY(0.0319)PGQQAPGPEPS(0.0198)QPLLELT(0.0216)PR;
EEPAAAGSGAASPSAAEK	EEPAAAGSGAAS[79.9663]PSAAEK	K	G	70	87	18	2	12S(79.9663)	sp|P29966|MARCS_HUMAN	P29966	MARCS_HUMAN	MARCKS	Myristoylated alanine-rich C-kinase substrate			1	4.79969e+06	MS/MS	STY:79.9663@EEPAAAGS(0.0699)GAAS(0.4651)PS(0.4651)AAEK;
EEPAAAGSGAASPSAAEK	EEPAAAGS[79.9663]GAASPSAAEK	K	G	70	87	18	2	8S(79.9663)	sp|P29966|MARCS_HUMAN	P29966	MARCS_HUMAN	MARCKS	Myristoylated alanine-rich C-kinase substrate			2	4.79969e+06	MS/MS	STY:79.9663@EEPAAAGS(0.9410)GAAS(0.0295)PS(0.0295)AAEK;
EEPDSENIPQELLSNLGHPESPPR	EEPDSENIPQELLSNLGHPES[79.9663]PPR	K	K	44	67	24	3	21S(79.9663)	sp|Q13309|SKP2_HUMAN	Q13309	SKP2_HUMAN	SKP2	S-phase kinase-associated protein 2			1	0	MS/MS	STY:79.9663@EEPDS(0.0339)ENIPQELLS(0.0302)NLGHPES(0.9359)PPR;
EEPLSEEEPCTSTAIASPEK	EEPLS[79.9663]EEEPC[57.0215]TSTAIASPEK	K	K	498	517	20	3	10C(57.0215),5S(79.9663)	sp|Q9Y2X3|NOP58_HUMAN	Q9Y2X3	NOP58_HUMAN	NOP58	Nucleolar protein 58			2	3.94557e+06	MS/MS	STY:79.9663@EEPLS(0.9443)EEEPCT(0.0132)S(0.0144)T(0.0144)AIAS(0.0137)PEK;
EEPSQNDISPK	EEPSQNDIS[79.9663]PK	K	T	81	91	11	2	9S(79.9663)	sp|Q9NR30|DDX21_HUMAN	Q9NR30	DDX21_HUMAN	DDX21	Nucleolar RNA helicase 2			2	4005157	MS/MS	STY:79.9663@EEPS(0.0514)QNDIS(0.9486)PK;
EEPSQNDISPK	EEPS[79.9663]QNDISPK	K	T	81	91	11	2	4S(79.9663)	sp|Q9NR30|DDX21_HUMAN	Q9NR30	DDX21_HUMAN	DDX21	Nucleolar RNA helicase 2			1	4005157	MS/MS	STY:79.9663@EEPS(0.9065)QNDIS(0.0935)PK;
EESAEELQAAEHPDEVEDPK	EES[79.9663]AEELQAAEHPDEVEDPK	K	N	145	164	20	3	3S(79.9663)	sp|O00193|SMAP_HUMAN	O00193	SMAP_HUMAN	SMAP	Small acidic protein			1	0	MS/MS	STY:79.9663@EES(1.0000)AEELQAAEHPDEVEDPK;
EESEESDEDMGFGLFD	EES[79.9663]EESDEDMGFGLFD	K	-	302	317	16	2	3S(79.9663)	sp|P05388|RLA0_HUMAN	P05388	RLA0_HUMAN	RPLP0	Large ribosomal subunit protein uL10	RPLP0P6	sp|Q8NHW5|RLA0L_HUMAN	2	6844756	MS/MS	STY:79.9663@EES(0.9387)EES(0.0613)DEDMGFGLFD;
EFITGDVEPTDAESEWHSENEEEEK	EFITGDVEPTDAESEWHS[79.9663]ENEEEEK	R	L	108	132	25	3	18S(79.9663)	sp|Q99733|NP1L4_HUMAN	Q99733	NP1L4_HUMAN	NAP1L4	Nucleosome assembly protein 1-like 4			4	3.8836224E7	MS/MS	STY:79.9663@EFIT(0.0168)GDVEPT(0.0483)DAES(0.0483)EWHS(0.8867)ENEEEEK;
EFITGDVEPTDAESEWHSENEEEEK	EFITGDVEPTDAES[79.9663]EWHSENEEEEK	R	L	108	132	25	3	14S(79.9663)	sp|Q99733|NP1L4_HUMAN	Q99733	NP1L4_HUMAN	NAP1L4	Nucleosome assembly protein 1-like 4			2	2.7360554E7	MS/MS	STY:79.9663@EFIT(0.1448)GDVEPT(0.3505)DAES(0.4931)EWHS(0.0117)ENEEEEK;
EGEEPTVYSDEEEPK	EGEEPTVYS[79.9663]DEEEPK	K	D	173	187	15	2	9S(79.9663)	sp|O00264|PGRC1_HUMAN	O00264	PGRC1_HUMAN	PGRMC1	Membrane-associated progesterone receptor component 1			2	1.82368E7	MS/MS	STY:79.9663@EGEEPT(0.0307)VY(0.0259)S(0.9434)DEEEPK;
EGEEPTVYSDEEEPKDESAR	EGEEPTVYS[79.9663]DEEEPKDESAR	K	K	173	192	20	3	9S(79.9663)	sp|O00264|PGRC1_HUMAN	O00264	PGRC1_HUMAN	PGRMC1	Membrane-associated progesterone receptor component 1			1	3799499	MS/MS	STY:79.9663@EGEEPT(0.0190)VY(0.0201)S(0.9428)DEEEPKDES(0.0181)AR;
EGEEPTVYSDEEEPK	EGEEPTVY[79.9663]SDEEEPK	K	D	173	187	15	2	8Y(79.9663)	sp|O00264|PGRC1_HUMAN	O00264	PGRC1_HUMAN	PGRMC1	Membrane-associated progesterone receptor component 1			2	1.82368E7	MS/MS	STY:79.9663@EGEEPT(0.0161)VY(0.4919)S(0.4919)DEEEPK;
EGEEPTVYSDEEEPKDESAR	EGEEPTVY[79.9663]SDEEEPKDESAR	K	K	173	192	20	3	8Y(79.9663)	sp|O00264|PGRC1_HUMAN	O00264	PGRC1_HUMAN	PGRMC1	Membrane-associated progesterone receptor component 1			1	3799499	MS/MS	STY:79.9663@EGEEPT(0.0091)VY(0.3449)S(0.3449)DEEEPKDES(0.3011)AR;
EGEEPTVYSDEEEPK	EGEEPT[79.9663]VYSDEEEPK	K	D	173	187	15	2	6T(79.9663)	sp|O00264|PGRC1_HUMAN	O00264	PGRC1_HUMAN	PGRMC1	Membrane-associated progesterone receptor component 1			1	1.82368E7	MS/MS	STY:79.9663@EGEEPT(0.4119)VY(0.2941)S(0.2941)DEEEPK;
EGETQGVAFEHESPADFQNSQSPVQDQDK	EGETQGVAFEHES[79.9663]PADFQNSQSPVQDQDK	R	S	341	369	29	3	13S(79.9663)	sp|P78332|RBM6_HUMAN	P78332	RBM6_HUMAN	RBM6	RNA-binding protein 6			1	0	MS/MS	STY:79.9663@EGET(0.0092)QGVAFEHES(0.3303)PADFQNS(0.3303)QS(0.3303)PVQDQDK;
EGHSLEMENENLVENGADSDEDDNSFLK	EGHSLEMENENLVENGADS[79.9663]DEDDNSFLK	K	Q	668	695	28	3	19S(79.9663)	sp|Q9UHB6|LIMA1_HUMAN	Q9UHB6	LIMA1_HUMAN	LIMA1	LIM domain and actin-binding protein 1			2	9903683	MS/MS	STY:79.9663@EGHS(0.0660)LEMENENLVENGADS(0.9024)DEDDNS(0.0316)FLK;
EGITGPPADSSKPIGPDDAIDALSSDFTCGSPTAAGK	EGITGPPADSSKPIGPDDAIDALSSDFTC[57.0215]GS[79.9663]PTAAGK	K	K	213	249	37	3	29C(57.0215),31S(79.9663)	sp|P20810|ICAL_HUMAN	P20810	ICAL_HUMAN	CAST	Calpastatin			1	9377689	MS/MS	STY:79.9663@EGIT(0.0323)GPPADS(0.0289)S(0.0289)KPIGPDDAIDALS(0.0184)S(0.0218)DFT(0.0074)CGS(0.8495)PT(0.0129)AAGK;
EGLRPGDTTSTFCGTPNYIAPEILR	EGLRPGDTTS[79.9663]TFC[57.0215]GTPNYIAPEILR	K	G	402	426	25	3	10S(79.9663),13C(57.0215)	sp|P41743|KPCI_HUMAN	P41743	KPCI_HUMAN	PRKCI	Protein kinase C iota type			1	0	MS/MS	STY:79.9663@EGLRPGDT(0.0084)T(0.0084)S(0.4833)T(0.4833)FCGT(0.0083)PNY(0.0083)IAPEILR;
EGLRPGDTTSTFCGTPNYIAPEILR	EGLRPGDT[79.9663]TSTFC[57.0215]GTPNYIAPEILR	K	G	402	426	25	3	13C(57.0215),8T(79.9663)	sp|P41743|KPCI_HUMAN	P41743	KPCI_HUMAN	PRKCI	Protein kinase C iota type			1	5465379	MS/MS	STY:79.9663@EGLRPGDT(0.9405)T(0.0122)S(0.0122)T(0.0122)FCGT(0.0109)PNY(0.0119)IAPEILR;
EGMNPSYDEYADSDEDQHDAYLER	EGMNPSYDEYADS[79.9663]DEDQHDAYLER	K	M	432	455	24	3	13S(79.9663)	sp|Q08945|SSRP1_HUMAN	Q08945	SSRP1_HUMAN	SSRP1	FACT complex subunit SSRP1			2	3.18643e+06	MS/MS	STY:79.9663@EGMNPS(0.0198)Y(0.0198)DEY(0.0198)ADS(0.9082)DEDQHDAY(0.0325)LER;
EGNTTEDDFPSSPGNGNK	EGNTTEDDFPSS[79.9663]PGNGNK	R	S	295	312	18	2	12S(79.9663)	sp|Q15007|FL2D_HUMAN	Q15007	FL2D_HUMAN	WTAP	Pre-mRNA-splicing regulator WTAP			1	3308057	MS/MS	STY:79.9663@EGNT(0.0202)T(0.0202)EDDFPS(0.0641)S(0.8956)PGNGNK;
EGNTTEDDFPSSPGNGNK	EGNTT[79.9663]EDDFPSSPGNGNK	R	S	295	312	18	2	5T(79.9663)	sp|Q15007|FL2D_HUMAN	Q15007	FL2D_HUMAN	WTAP	Pre-mRNA-splicing regulator WTAP			1	3308057	MS/MS	STY:79.9663@EGNT(0.0136)T(0.6087)EDDFPS(0.0130)S(0.3647)PGNGNK;
EGRGESENAGTNQETR	EGRGES[79.9663]ENAGTNQETR	R	S	426	441	16	2	6S(79.9663)	sp|Q08170|SRSF4_HUMAN	Q08170	SRSF4_HUMAN	SRSF4	Serine/arginine-rich splicing factor 4			1	732943	MS/MS	STY:79.9663@EGRGES(0.8658)ENAGT(0.0973)NQET(0.0369)R;
EGSPIPHDPEFGSK	EGSPIPHDPEFGS[79.9663]K	R	L	443	456	14	2	13S(79.9663)	sp|P85037|FOXK1_HUMAN	P85037	FOXK1_HUMAN	FOXK1	Forkhead box protein K1			1	4907596	MS/MS	STY:79.9663@EGS(0.4203)PIPHDPEFGS(0.5797)K;
EGTAPSENGETK	EGTAPSENGET[79.9663]K	K	A	73	84	12	2	11T(79.9663)	sp|Q15651|HMGN3_HUMAN	Q15651	HMGN3_HUMAN	HMGN3	High mobility group nucleosome-binding domain-containing protein 3			1	3.99214e+06	MS/MS	STY:79.9663@EGT(0.2177)APS(0.2177)ENGET(0.5646)K;
EGTPGSPSETPGPSPAGPAGDEPAESPSETPGPR	EGTPGSPSETPGPSPAGPAGDEPAES[79.9663]PSETPGPR	K	P	512	545	34	3	26S(79.9663)	sp|Q9NZT2|OGFR_HUMAN	Q9NZT2	OGFR_HUMAN	OGFR	Opioid growth factor receptor			1	3.85155e+06	MS/MS	STY:79.9663@EGT(0.0203)PGS(0.1596)PS(0.1596)ET(0.1596)PGPS(0.1596)PAGPAGDEPAES(0.1693)PS(0.1693)ET(0.0028)PGPR;
EHASIDAQSGAGVPNPSTSASPK	EHASIDAQSGAGVPNPSTSAS[79.9663]PK	R	K	348	370	23	3	21S(79.9663)	sp|Q8IXJ6|SIR2_HUMAN	Q8IXJ6	SIR2_HUMAN	SIRT2	NAD-dependent protein deacetylase sirtuin-2			1	2.03744e+06	MS/MS	STY:79.9663@EHAS(0.0108)IDAQS(0.0108)GAGVPNPS(0.0211)T(0.0211)S(0.0211)AS(0.9150)PK;
EIAIVHSDAEK	EIAIVHS[79.9663]DAEK	K	E	341	351	11	2,3	7S(79.9663)	sp|Q9H307|PININ_HUMAN	Q9H307	PININ_HUMAN	PNN	Pinin			5	1.3059712E7	MS/MS	STY:79.9663@EIAIVHS(1.0000)DAEK;
EIQNGNLHESDSESVPR	EIQNGNLHESDSES[79.9663]VPR	K	D	66	82	17	2,3	14S(79.9663)	sp|Q86UP2|KTN1_HUMAN	Q86UP2	KTN1_HUMAN	KTN1	Kinectin			3	1.3900883E7	MS/MS	STY:79.9663@EIQNGNLHES(0.0259)DS(0.0271)ES(0.9470)VPR;
EIQNGNLHESDSESVPR	EIQNGNLHESDS[79.9663]ESVPR	K	D	66	82	17	2,3	12S(79.9663)	sp|Q86UP2|KTN1_HUMAN	Q86UP2	KTN1_HUMAN	KTN1	Kinectin			3	0	MS/MS	STY:79.9663@EIQNGNLHES(0.0321)DS(0.9367)ES(0.0313)VPR;
EIQNGNLHESDSESVPR	EIQNGNLHES[79.9663]DSESVPR	K	D	66	82	17	2,3	10S(79.9663)	sp|Q86UP2|KTN1_HUMAN	Q86UP2	KTN1_HUMAN	KTN1	Kinectin			9	1.4909773E7	MS/MS	STY:79.9663@EIQNGNLHES(0.9357)DS(0.0321)ES(0.0321)VPR;
EISDDEAEEEK	EIS[79.9663]DDEAEEEK	K	G	224	234	11	2	3S(79.9663)	sp|P08238|HS90B_HUMAN	P08238	HS90B_HUMAN	HSP90AB1	Heat shock protein HSP 90-beta	HSP90AB3P	sp|Q58FF7|H90B3_HUMAN	16	4.04825312E8	MS/MS	STY:79.9663@EIS(1.0000)DDEAEEEK;
EITTFEGCK	EIT[79.9663]TFEGC[57.0215]K	K	I	64	72	9	2	3T(79.9663),8C(57.0215)	sp|Q9NW13|RBM28_HUMAN	Q9NW13	RBM28_HUMAN	RBM28	RNA-binding protein 28			1	4.99186e+06	MS/MS	STY:79.9663@EIT(0.5000)T(0.5000)FEGCK;
EKEISDDEAEEEK	EKEIS[79.9663]DDEAEEEK	R	G	222	234	13	2	5S(79.9663)	sp|P08238|HS90B_HUMAN	P08238	HS90B_HUMAN	HSP90AB1	Heat shock protein HSP 90-beta			4	1.0427673E7	MS/MS	STY:79.9663@EKEIS(1.0000)DDEAEEEK;
EKPELSEPSHLNGPSSDPEAAFLSR	EKPELSEPSHLNGPSSDPEAAFLS[79.9663]R	K	D	1997	2021	25	3	24S(79.9663)	sp|Q9H4A3|WNK1_HUMAN	Q9H4A3	WNK1_HUMAN	WNK1	Serine/threonine-protein kinase WNK1			1	7.77249e+06	MS/MS	STY:79.9663@EKPELS(0.0551)EPS(0.0557)HLNGPS(0.1578)S(0.0585)DPEAAFLS(0.6729)R;
EKPELSEPSHLNGPSSDPEAAFLSR	EKPELSEPSHLNGPS[79.9663]SDPEAAFLSR	K	D	1997	2021	25	3	15S(79.9663)	sp|Q9H4A3|WNK1_HUMAN	Q9H4A3	WNK1_HUMAN	WNK1	Serine/threonine-protein kinase WNK1			1	9296256	MS/MS	STY:79.9663@EKPELS(0.2205)EPS(0.0878)HLNGPS(0.2376)S(0.2376)DPEAAFLS(0.2166)R;
EKTPELPEPSVK	EKTPELPEPS[79.9663]VK	K	V	218	229	12	2,3	10S(79.9663)	sp|Q8IYB3|SRRM1_HUMAN	Q8IYB3	SRRM1_HUMAN	SRRM1	Serine/arginine repetitive matrix protein 1			3	1.789174E7	MS/MS	STY:79.9663@EKT(0.0565)PELPEPS(0.9435)VK;
EKTPELPEPSVK	EKT[79.9663]PELPEPSVK	K	V	218	229	12	2,3	3T(79.9663)	sp|Q8IYB3|SRRM1_HUMAN	Q8IYB3	SRRM1_HUMAN	SRRM1	Serine/arginine repetitive matrix protein 1			6	1.7908086E7	MS/MS	STY:79.9663@EKT(0.9495)PELPEPS(0.0505)VK;
ELEHNAEETYGENDENTDDK	ELEHNAEETYGENDENT[79.9663]DDK	R	N	632	651	20	2	17T(79.9663)	sp|O00461|GOLI4_HUMAN	O00461	GOLI4_HUMAN	GOLIM4	Golgi integral membrane protein 4			1	2.57537e+06	MS/MS	STY:79.9663@ELEHNAEET(0.0672)Y(0.0718)GENDENT(0.8610)DDK;
ELEHNAEETYGENDENTDDK	ELEHNAEET[79.9663]YGENDENTDDK	R	N	632	651	20	2	9T(79.9663)	sp|O00461|GOLI4_HUMAN	O00461	GOLI4_HUMAN	GOLIM4	Golgi integral membrane protein 4			1	2.57537e+06	MS/MS	STY:79.9663@ELEHNAEET(0.3333)Y(0.3333)GENDENT(0.3333)DDK;
ELGTGEQPLSPTTATSPYGGGHALAGQTSPK	ELGTGEQPLS[79.9663]PTTATSPYGGGHALAGQTSPK	R	Q	631	661	31	3	10S(79.9663)	sp|Q96NU1|SAM11_HUMAN	Q96NU1	SAM11_HUMAN	SAMD11	Sterile alpha motif domain-containing protein 11			1	2.99363e+06	MS/MS	STY:79.9663@ELGT(0.0098)GEQPLS(0.7088)PT(0.0086)T(0.0086)AT(0.0086)S(0.0086)PY(0.1850)GGGHALAGQT(0.0311)S(0.0311)PK;
ELPPSPEKK	ELPPS[79.9663]PEKK	K	T	692	700	9	2	5S(79.9663)	sp|P27816|MAP4_HUMAN	P27816	MAP4_HUMAN	MAP4	Microtubule-associated protein 4			7	0	MS/MS	STY:79.9663@ELPPS(1.0000)PEKK;
ELQGDGPPSSPTNDPTVK	ELQGDGPPSSPT[79.9663]NDPTVK	K	Y	704	721	18	2	12T(79.9663)	sp|Q12873|CHD3_HUMAN	Q12873	CHD3_HUMAN	CHD3	Chromodomain-helicase-DNA-binding protein 3			1	3718272	MS/MS	STY:79.9663@ELQGDGPPS(0.0178)S(0.0179)PT(0.9445)NDPT(0.0198)VK;
ELSNSPLR	ELS[79.9663]NSPLR	K	E	1316	1323	8	2	3S(79.9663)	sp|Q9UQ35|SRRM2_HUMAN	Q9UQ35	SRRM2_HUMAN	SRRM2	Serine/arginine repetitive matrix protein 2			2	9582714	MS/MS	STY:79.9663@ELS(0.5000)NS(0.5000)PLR;
ELSPAGSISK	ELS[79.9663]PAGSISK	K	N	617	626	10	2	3S(79.9663)	sp|O95453|PARN_HUMAN	O95453	PARN_HUMAN	PARN	Poly(A)-specific ribonuclease PARN			1	1.27859e+06	MS/MS	STY:79.9663@ELS(0.3333)PAGS(0.3333)IS(0.3333)K;
ELTPASPTCTNSVSK	ELTPAS[79.9663]PTC[57.0215]TNSVSK	R	N	521	535	15	2	6S(79.9663),9C(57.0215)	sp|P28715|ERCC5_HUMAN	P28715	ERCC5_HUMAN	ERCC5	DNA excision repair protein ERCC-5			1	2636849	MS/MS	STY:79.9663@ELT(0.0118)PAS(0.9424)PT(0.0115)CT(0.0115)NS(0.0115)VS(0.0115)K;
EMEHNTVCAAGTSPVGEIGEEK	EMEHNTVC[57.0215]AAGT[79.9663]SPVGEIGEEK	K	I	1544	1565	22	3	12T(79.9663),8C(57.0215)	sp|P18583|SON_HUMAN	P18583	SON_HUMAN	SON	Protein SON			2	6928281	MS/MS	STY:79.9663@EMEHNT(0.0264)VCAAGT(0.9409)S(0.0327)PVGEIGEEK;
EMLASDDEEDVSSK	EMLAS[79.9663]DDEEDVSSK	K	V	76	89	14	2	5S(79.9663)	sp|Q0ZGT2|NEXN_HUMAN	Q0ZGT2	NEXN_HUMAN	NEXN	Nexilin			2	1.5483589E7	MS/MS	STY:79.9663@EMLAS(0.9028)DDEEDVS(0.0486)S(0.0486)K;
EMLMEDVGSEEEQEEEDEAPFQEK	EMLMEDVGS[79.9663]EEEQEEEDEAPFQEK	R	D	105	128	24	3	9S(79.9663)	sp|Q9H1E3|NUCKS_HUMAN	Q9H1E3	NUCKS_HUMAN	NUCKS1	Nuclear ubiquitous casein and cyclin-dependent kinase substrate 1			1	0	MS/MS	STY:79.9663@EMLMEDVGS(1.0000)EEEQEEEDEAPFQEK;
ENFSPER	ENFS[79.9663]PER	R	F	858	864	7	2	4S(79.9663)	sp|Q7Z6E9|RBBP6_HUMAN	Q7Z6E9	RBBP6_HUMAN	RBBP6	E3 ubiquitin-protein ligase RBBP6			1	2.3911e+06	MS/MS	STY:79.9663@ENFS(1.0000)PER;
ENPPVEDSSDEDDK	ENPPVEDS[79.9663]SDEDDK	R	R	491	504	14	2	8S(79.9663)	sp|Q8TCJ2|STT3B_HUMAN	Q8TCJ2	STT3B_HUMAN	STT3B	Dolichyl-diphosphooligosaccharide--protein glycosyltransferase subunit STT3B			1	2.03472e+06	MS/MS	STY:79.9663@ENPPVEDS(0.5000)S(0.5000)DEDDK;
ENSFGSPLEFR	ENS[79.9663]FGSPLEFR	R	N	1324	1334	11	2	3S(79.9663)	sp|Q9UQ35|SRRM2_HUMAN	Q9UQ35	SRRM2_HUMAN	SRRM2	Serine/arginine repetitive matrix protein 2			1	0	MS/MS	STY:79.9663@ENS(0.5000)FGS(0.5000)PLEFR;
ENVEYIEREESDGEYDEFGR	ENVEYIEREES[79.9663]DGEYDEFGR	R	K	110	129	20	3	11S(79.9663)	sp|O95218|ZRAB2_HUMAN	O95218	ZRAB2_HUMAN	ZRANB2	Zinc finger Ran-binding domain-containing protein 2			1	1.63465e+06	MS/MS	STY:79.9663@ENVEY(0.0376)IEREES(0.9319)DGEY(0.0304)DEFGR;
ENVEYIEREESDGEYDEFGR	ENVEY[79.9663]IEREESDGEYDEFGR	R	K	110	129	20	3	5Y(79.9663)	sp|O95218|ZRAB2_HUMAN	O95218	ZRAB2_HUMAN	ZRANB2	Zinc finger Ran-binding domain-containing protein 2			1	1.63465e+06	MS/MS	STY:79.9663@ENVEY(0.4720)IEREES(0.4720)DGEY(0.0559)DEFGR;
EPAITSQNSPEAR	EPAITSQNS[79.9663]PEAR	K	E	92	104	13	2	9S(79.9663)	sp|P23193|TCEA1_HUMAN	P23193	TCEA1_HUMAN	TCEA1	Transcription elongation factor A protein 1			3	2.7105378E7	MS/MS	STY:79.9663@EPAIT(0.0260)S(0.0260)QNS(0.9480)PEAR;
EPAITSQNSPEAR	EPAIT[79.9663]SQNSPEAR	K	E	92	104	13	2	5T(79.9663)	sp|P23193|TCEA1_HUMAN	P23193	TCEA1_HUMAN	TCEA1	Transcription elongation factor A protein 1			3	2.7105378E7	MS/MS	STY:79.9663@EPAIT(0.4035)S(0.2982)QNS(0.2982)PEAR;
EPALPLEPDSGGNTSPGVTANGEAR	EPALPLEPDS[79.9663]GGNTSPGVTANGEAR	R	T	682	706	25	3	10S(79.9663)	sp|Q92974|ARHG2_HUMAN	Q92974	ARHG2_HUMAN	ARHGEF2	Rho guanine nucleotide exchange factor 2			3	9845344	MS/MS	STY:79.9663@EPALPLEPDS(0.5634)GGNT(0.1597)S(0.1384)PGVT(0.1384)ANGEAR;
EPLPEYVR	EPLPEY[79.9663]VR	K	L	57	64	8	2	6Y(79.9663)	sp|Q9ULX3|NOB1_HUMAN	Q9ULX3	NOB1_HUMAN	NOB1	RNA-binding protein NOB1			1	0	MS/MS	STY:79.9663@EPLPEY(1.0000)VR;
EPPRASPPGGLAEPPGSAGPQAGPTVVPGSATPMETGIAETPEGR	EPPRASPPGGLAEPPGSAGPQAGPTVVPGSAT[79.9663]PMETGIAETPEGR	K	R	64	108	45	4	32T(79.9663)	sp|O60341|KDM1A_HUMAN	O60341	KDM1A_HUMAN	KDM1A	Lysine-specific histone demethylase 1A			1	1.3693398E7	MS/MS	STY:79.9663@EPPRAS(0.0633)PPGGLAEPPGS(0.3409)AGPQAGPT(0.0392)VVPGS(0.0789)AT(0.4605)PMET(0.0060)GIAET(0.0112)PEGR;
EPPRASPPGGLAEPPGSAGPQAGPTVVPGSATPMETGIAETPEGR	EPPRAS[79.9663]PPGGLAEPPGSAGPQAGPTVVPGSATPMETGIAETPEGR	K	R	64	108	45	4	6S(79.9663)	sp|O60341|KDM1A_HUMAN	O60341	KDM1A_HUMAN	KDM1A	Lysine-specific histone demethylase 1A			1	1.3693398E7	MS/MS	STY:79.9663@EPPRAS(0.4756)PPGGLAEPPGS(0.3641)AGPQAGPT(0.0199)VVPGS(0.0357)AT(0.0357)PMET(0.0492)GIAET(0.0197)PEGR;
EPSAAAPTGAGGVAPGSGNNSGGPSLLVPLPVNPPSSPTPSFSDAK	EPSAAAPTGAGGVAPGSGNNSGGPSLLVPLPVNPPSS[79.9663]PTPSFSDAK	K	A	471	516	46	4	37S(79.9663)	sp|O75175|CNOT3_HUMAN	O75175	CNOT3_HUMAN	CNOT3	CCR4-NOT transcription complex subunit 3			1	0	MS/MS	STY:79.9663@EPS(0.0866)AAAPT(0.1190)GAGGVAPGS(0.1692)GNNS(0.0408)GGPS(0.0452)LLVPLPVNPPS(0.0036)S(0.3935)PT(0.0039)PS(0.0039)FS(0.1344)DAK;
EPVADEEEEDSDDDVEPITEFR	EPVADEEEEDS[79.9663]DDDVEPITEFR	K	F	92	113	22	3	11S(79.9663)	sp|P54105|ICLN_HUMAN	P54105	ICLN_HUMAN	CLNS1A	Methylosome subunit pICln			1	3.92903e+06	MS/MS	STY:79.9663@EPVADEEEEDS(0.9454)DDDVEPIT(0.0546)EFR;
EQEESLGSPVHHSPFDAQTTGDGTEDPSLTALR	EQEESLGSPVHHSPFDAQTT[79.9663]GDGTEDPSLTALR	K	M	508	540	33	4	20T(79.9663)	sp|Q9NP74|PALMD_HUMAN	Q9NP74	PALMD_HUMAN	PALMD	Palmdelphin			1	2.89295e+06	MS/MS	STY:79.9663@EQEES(0.0331)LGS(0.0331)PVHHS(0.2566)PFDAQT(0.0145)T(0.2987)GDGT(0.2987)EDPS(0.0361)LT(0.0292)ALR;
EQEESLGSPVHHSPFDAQTTGDGTEDPSLTALR	EQEESLGSPVHHSPFDAQT[79.9663]TGDGTEDPSLTALR	K	M	508	540	33	4	19T(79.9663)	sp|Q9NP74|PALMD_HUMAN	Q9NP74	PALMD_HUMAN	PALMD	Palmdelphin			1	2.89295e+06	MS/MS	STY:79.9663@EQEES(0.2779)LGS(0.1991)PVHHS(0.2219)PFDAQT(0.2809)T(0.0063)GDGT(0.0063)EDPS(0.0038)LT(0.0038)ALR;
EQEESLGSPVHHSPFDAQTTGDGTEDPSLTALR	EQEESLGS[79.9663]PVHHSPFDAQTTGDGTEDPSLTALR	K	M	508	540	33	4	8S(79.9663)	sp|Q9NP74|PALMD_HUMAN	Q9NP74	PALMD_HUMAN	PALMD	Palmdelphin			1	2.89295e+06	MS/MS	STY:79.9663@EQEES(0.2320)LGS(0.6558)PVHHS(0.0076)PFDAQT(0.0209)T(0.0209)GDGT(0.0209)EDPS(0.0209)LT(0.0209)ALR;
EQPEMEDANSEK	EQPEMEDANS[79.9663]EK	R	S	11	22	12	2	10S(79.9663)	sp|Q13523|PRP4K_HUMAN	Q13523	PRP4K_HUMAN	PRP4K	Serine/threonine-protein kinase PRP4 homolog			2	4545576	MS/MS	STY:79.9663@EQPEMEDANS(1.0000)EK;
EQSHAEISPPAESGQAVEECK	EQS[79.9663]HAEISPPAESGQAVEEC[57.0215]K	R	E	246	266	21	3	20C(57.0215),3S(79.9663)	sp|Q02952|AKA12_HUMAN	Q02952	AKA12_HUMAN	AKAP12	A-kinase anchor protein 12			2	2.3781e+06	MS/MS	STY:79.9663@EQS(0.7677)HAEIS(0.1829)PPAES(0.0494)GQAVEECK;
EQTLSPTITSGLHNIAR	EQT[79.9663]LSPTITSGLHNIAR	R	S	1159	1175	17	2	3T(79.9663)	sp|O94979|SC31A_HUMAN	O94979	SC31A_HUMAN	SEC31A	Protein transport protein Sec31A			1	2932207	MS/MS	STY:79.9663@EQT(0.2000)LS(0.2000)PT(0.2000)IT(0.2000)S(0.2000)GLHNIAR;
ERDAEQSGSPR	ERDAEQS[79.9663]GSPR	R	T	186	196	11	2	7S(79.9663)	sp|P08651|NFIC_HUMAN	P08651	NFIC_HUMAN	NFIC	Nuclear factor 1 C-type			1	0	MS/MS	STY:79.9663@ERDAEQS(0.5000)GS(0.5000)PR;
ERDHSPTPSVFNSDEER	ERDHSPTPSVFNS[79.9663]DEER	R	Y	488	504	17	3	13S(79.9663)	sp|Q6UN15|FIP1_HUMAN	Q6UN15	FIP1_HUMAN	FIP1L1	Pre-mRNA 3'-end-processing factor FIP1			1	2.75458e+06	MS/MS	STY:79.9663@ERDHS(0.0222)PT(0.0228)PS(0.0228)VFNS(0.9321)DEER;
ERSMSENAVR	ERSMS[79.9663]ENAVR	R	Q	153	162	10	2	5S(79.9663)	sp|Q9GZY8|MFF_HUMAN	Q9GZY8	MFF_HUMAN	MFF	Mitochondrial fission factor			1	2.54397e+06	MS/MS	STY:79.9663@ERS(0.2028)MS(0.7972)ENAVR;
ERSMSENAVR	ERS[79.9663]MSENAVR	R	Q	153	162	10	2	3S(79.9663)	sp|Q9GZY8|MFF_HUMAN	Q9GZY8	MFF_HUMAN	MFF	Mitochondrial fission factor			1	1.97407e+06	MS/MS	STY:79.9663@ERS(0.5000)MS(0.5000)ENAVR;
ERSPALK	ERS[79.9663]PALK	R	S	246	252	7	2	3S(79.9663)	sp|Q9Y2W1|TR150_HUMAN	Q9Y2W1	TR150_HUMAN	THRAP3	Thyroid hormone receptor-associated protein 3			2	1.1187958E7	MS/MS	STY:79.9663@ERS(1.0000)PALK;
ESDQTLAALLSPK	ESDQTLAALLS[79.9663]PK	K	E	1687	1699	13	2	11S(79.9663)	sp|P18583|SON_HUMAN	P18583	SON_HUMAN	SON	Protein SON			1	5.89254e+06	MS/MS	STY:79.9663@ES(0.0272)DQT(0.0272)LAALLS(0.9455)PK;
ESEDKPEIEDVGSDEEEEK	ESEDKPEIEDVGS[79.9663]DEEEEK	K	K	251	269	19	2,3	13S(79.9663)	sp|P07900|HS90A_HUMAN	P07900	HS90A_HUMAN	HSP90AA1	Heat shock protein HSP 90-alpha			7	4.3489472E7	MS/MS	STY:79.9663@ES(0.0542)EDKPEIEDVGS(0.9458)DEEEEK;
ESEDKPEIEDVGSDEEEEKK	ESEDKPEIEDVGS[79.9663]DEEEEKK	K	D	251	270	20	3	13S(79.9663)	sp|P07900|HS90A_HUMAN	P07900	HS90A_HUMAN	HSP90AA1	Heat shock protein HSP 90-alpha			6	2.0091676E7	MS/MS	STY:79.9663@ES(0.0515)EDKPEIEDVGS(0.9485)DEEEEKK;
ESEQESEEEILAQK	ESEQES[79.9663]EEEILAQK	K	K	222	235	14	2	6S(79.9663)	sp|Q9BW71|HIRP3_HUMAN	Q9BW71	HIRP3_HUMAN	HIRIP3	HIRA-interacting protein 3			1	0	MS/MS	STY:79.9663@ES(0.0514)EQES(0.9486)EEEILAQK;
ESLKEEDESDDDNM	ESLKEEDES[79.9663]DDDNM	K	-	242	255	14	2	9S(79.9663)	sp|P25788|PSA3_HUMAN	P25788	PSA3_HUMAN	PSMA3	Proteasome subunit alpha type-3			3	3.431462E7	MS/MS	STY:79.9663@ES(0.0525)LKEEDES(0.9475)DDDNM;
ESPRPLQLPGAEGPAISDGEEGGGEPGAGGGAAGAAGAGR	ESPRPLQLPGAEGPAIS[79.9663]DGEEGGGEPGAGGGAAGAAGAGR	R	R	74	113	40	3,4	17S(79.9663)	sp|Q6PKG0|LARP1_HUMAN	Q6PKG0	LARP1_HUMAN	LARP1	La-related protein 1			3	2.1632998E7	MS/MS	STY:79.9663@ES(0.0526)PRPLQLPGAEGPAIS(0.9474)DGEEGGGEPGAGGGAAGAAGAGR;
ESSANNSVSPSESLR	ESSANNSVS[79.9663]PSESLR	R	A	195	209	15	2	9S(79.9663)	sp|Q04726|TLE3_HUMAN	Q04726	TLE3_HUMAN	TLE3	Transducin-like enhancer protein 3			1	3.45129e+06	MS/MS	STY:79.9663@ES(0.0465)S(0.0465)ANNS(0.0919)VS(0.2717)PS(0.2717)ES(0.2717)LR;
ESTQLSPADLTEGKPTDPSK	ESTQLSPADLT[79.9663]EGKPTDPSK	R	L	451	470	20	3	11T(79.9663)	sp|Q08J23|NSUN2_HUMAN	Q08J23	NSUN2_HUMAN	NSUN2	RNA cytosine C(5)-methyltransferase NSUN2			1	1.0151966E7	MS/MS	STY:79.9663@ES(0.2021)T(0.2021)QLS(0.1724)PADLT(0.2096)EGKPT(0.2096)DPS(0.0042)K;
ESTQLSPADLTEGKPTDPSK	ESTQLS[79.9663]PADLTEGKPTDPSK	R	L	451	470	20	3	6S(79.9663)	sp|Q08J23|NSUN2_HUMAN	Q08J23	NSUN2_HUMAN	NSUN2	RNA cytosine C(5)-methyltransferase NSUN2			2	1.0151966E7	MS/MS	STY:79.9663@ES(0.0112)T(0.0102)QLS(0.9106)PADLT(0.0142)EGKPT(0.0213)DPS(0.0326)K;
ESVPEFPLSPPK	ESVPEFPLS[79.9663]PPK	K	K	30	41	12	2	9S(79.9663)	sp|P16949|STMN1_HUMAN	P16949	STMN1_HUMAN	STMN1	Stathmin			4	3.0295832E7	MS/MS	STY:79.9663@ES(0.0538)VPEFPLS(0.9462)PPK;
ESEDKPEIEDVGSDEEEEK	ES[79.9663]EDKPEIEDVGSDEEEEK	K	K	251	269	19	3	2S(79.9663)	sp|P07900|HS90A_HUMAN	P07900	HS90A_HUMAN	HSP90AA1	Heat shock protein HSP 90-alpha			3	2.8607496E7	MS/MS	STY:79.9663@ES(0.9104)EDKPEIEDVGS(0.0896)DEEEEK;
ESEDSETQPFDTHLEAYGPCLSPPR	ES[79.9663]EDSETQPFDTHLEAYGPC[57.0215]LSPPR	R	A	759	783	25	3	20C(57.0215),2S(79.9663)	sp|Q14676|MDC1_HUMAN	Q14676	MDC1_HUMAN	MDC1	Mediator of DNA damage checkpoint protein 1			1	0	MS/MS	STY:79.9663@ES(0.6085)EDS(0.0334)ET(0.0334)QPFDT(0.0334)HLEAY(0.0109)GPCLS(0.2804)PPR;
ESEQESEEEILAQK	ES[79.9663]EQESEEEILAQK	K	K	222	235	14	2	2S(79.9663)	sp|Q9BW71|HIRP3_HUMAN	Q9BW71	HIRP3_HUMAN	HIRIP3	HIRA-interacting protein 3			1	0	MS/MS	STY:79.9663@ES(0.9310)EQES(0.0690)EEEILAQK;
ESLKEEDESDDDNM	ES[79.9663]LKEEDESDDDNM	K	-	242	255	14	2	2S(79.9663)	sp|P25788|PSA3_HUMAN	P25788	PSA3_HUMAN	PSMA3	Proteasome subunit alpha type-3			2	3.431462E7	MS/MS	STY:79.9663@ES(0.9287)LKEEDES(0.0713)DDDNM;
ESLKEEDESDDDNM	ES[79.9663]LKEEDESDDDNM[15.9949]	K	-	242	255	14	2	14M(15.9949),2S(79.9663)	sp|P25788|PSA3_HUMAN	P25788	PSA3_HUMAN	PSMA3	Proteasome subunit alpha type-3			1	0	MS/MS	STY:79.9663@ES(0.8298)LKEEDES(0.1702)DDDNM;M:15.9949@ESLKEEDESDDDNM(1.0000);
ESPRPLQLPGAEGPAISDGEEGGGEPGAGGGAAGAAGAGR	ES[79.9663]PRPLQLPGAEGPAISDGEEGGGEPGAGGGAAGAAGAGR	R	R	74	113	40	3,4	2S(79.9663)	sp|Q6PKG0|LARP1_HUMAN	Q6PKG0	LARP1_HUMAN	LARP1	La-related protein 1			2	1.4293281E7	MS/MS	STY:79.9663@ES(0.9413)PRPLQLPGAEGPAIS(0.0587)DGEEGGGEPGAGGGAAGAAGAGR;
ESVPEFPLSPPK	ES[79.9663]VPEFPLSPPK	K	K	30	41	12	2	2S(79.9663)	sp|P16949|STMN1_HUMAN	P16949	STMN1_HUMAN	STMN1	Stathmin			3	3.8981924E7	MS/MS	STY:79.9663@ES(0.9479)VPEFPLS(0.0521)PPK;
ETEEQDSDSAEQGDPAGEGK	ETEEQDS[79.9663]DSAEQGDPAGEGK	R	E	54	73	20	2	7S(79.9663)	sp|O95361|TRI16_HUMAN	O95361	TRI16_HUMAN	TRIM16	Tripartite motif-containing protein 16			1	1.97869e+06	MS/MS	STY:79.9663@ET(0.0246)EEQDS(0.4877)DS(0.4877)AEQGDPAGEGK;
ETERASPIK	ETERAS[79.9663]PIK	K	M	353	361	9	2	6S(79.9663)	sp|P27816|MAP4_HUMAN	P27816	MAP4_HUMAN	MAP4	Microtubule-associated protein 4			1	7472301	MS/MS	STY:79.9663@ET(0.0508)ERAS(0.9492)PIK;
ETESAPGSPR	ETESAPGS[79.9663]PR	K	A	514	523	10	2	8S(79.9663)	sp|Q6PKG0|LARP1_HUMAN	Q6PKG0	LARP1_HUMAN	LARP1	La-related protein 1			1	1.7845e+06	MS/MS	STY:79.9663@ET(0.0264)ES(0.0264)APGS(0.9472)PR;
ETPAATEAPSSTPK	ETPAATEAPSST[79.9663]PK	K	A	185	198	14	2	12T(79.9663)	sp|P80723|BASP1_HUMAN	P80723	BASP1_HUMAN	BASP1	Brain acid soluble protein 1			1	1.3537185E7	MS/MS	STY:79.9663@ET(0.0134)PAAT(0.0131)EAPS(0.0133)S(0.0133)T(0.9468)PK;
ETPAATEAPSSTPK	ETPAATEAPS[79.9663]STPK	K	A	185	198	14	2	10S(79.9663)	sp|P80723|BASP1_HUMAN	P80723	BASP1_HUMAN	BASP1	Brain acid soluble protein 1			2	1.3537185E7	MS/MS	STY:79.9663@ET(0.0131)PAAT(0.0131)EAPS(0.9417)S(0.0189)T(0.0132)PK;
ETPAATEAPSSTPK	ETPAAT[79.9663]EAPSSTPK	K	A	185	198	14	2	6T(79.9663)	sp|P80723|BASP1_HUMAN	P80723	BASP1_HUMAN	BASP1	Brain acid soluble protein 1			1	1.3537185E7	MS/MS	STY:79.9663@ET(0.0176)PAAT(0.9309)EAPS(0.0172)S(0.0172)T(0.0172)PK;
ETPHSPGVEDAPIAK	ETPHS[79.9663]PGVEDAPIAK	R	V	486	500	15	2,3	5S(79.9663)	sp|Q9UHB6|LIMA1_HUMAN	Q9UHB6	LIMA1_HUMAN	LIMA1	LIM domain and actin-binding protein 1			5	3.43282E7	MS/MS	STY:79.9663@ET(0.0507)PHS(0.9493)PGVEDAPIAK;
ETQSPEQVK	ETQS[79.9663]PEQVK	K	S	493	501	9	2	4S(79.9663)	sp|Q9NYF8|BCLF1_HUMAN	Q9NYF8	BCLF1_HUMAN	BCLAF1	Bcl-2-associated transcription factor 1			1	2925616	MS/MS	STY:79.9663@ET(0.1255)QS(0.8745)PEQVK;
ETEEQDSDSAEQGDPAGEGK	ET[79.9663]EEQDSDSAEQGDPAGEGK	R	E	54	73	20	2	2T(79.9663)	sp|O95361|TRI16_HUMAN	O95361	TRI16_HUMAN	TRIM16	Tripartite motif-containing protein 16			1	1.97869e+06	MS/MS	STY:79.9663@ET(0.4824)EEQDS(0.4824)DS(0.0351)AEQGDPAGEGK;
ETESAPGSPR	ET[79.9663]ESAPGSPR	K	A	514	523	10	2	2T(79.9663)	sp|Q6PKG0|LARP1_HUMAN	Q6PKG0	LARP1_HUMAN	LARP1	La-related protein 1			2	1.95747e+06	MS/MS	STY:79.9663@ET(0.4891)ES(0.4891)APGS(0.0217)PR;
ETPAATEAPSSTPK	ET[79.9663]PAATEAPSSTPK	K	A	185	198	14	2	2T(79.9663)	sp|P80723|BASP1_HUMAN	P80723	BASP1_HUMAN	BASP1	Brain acid soluble protein 1			1	1.385689E7	MS/MS	STY:79.9663@ET(0.2708)PAAT(0.2708)EAPS(0.1528)S(0.1528)T(0.1528)PK;
ETPHSPGVEDAPIAK	ET[79.9663]PHSPGVEDAPIAK	R	V	486	500	15	2	2T(79.9663)	sp|Q9UHB6|LIMA1_HUMAN	Q9UHB6	LIMA1_HUMAN	LIMA1	LIM domain and actin-binding protein 1			1	1.2921858E7	MS/MS	STY:79.9663@ET(0.5000)PHS(0.5000)PGVEDAPIAK;
ETQSPEQVK	ET[79.9663]QSPEQVK	K	S	493	501	9	2	2T(79.9663)	sp|Q9NYF8|BCLF1_HUMAN	Q9NYF8	BCLF1_HUMAN	BCLAF1	Bcl-2-associated transcription factor 1			2	1.2317692E7	MS/MS	STY:79.9663@ET(0.9460)QS(0.0540)PEQVK;
ETVQTTQSPTPVEK	ET[79.9663]VQTTQSPTPVEK	K	E	610	623	14	2	2T(79.9663)	sp|Q9UPN6|SCAF8_HUMAN	Q9UPN6	SCAF8_HUMAN	SCAF8	SR-related and CTD-associated factor 8			2	0	MS/MS	STY:79.9663@ET(0.8417)VQT(0.0163)T(0.0163)QS(0.0127)PT(0.1130)PVEK;
EVAENQQNQSSDPEEEK	EVAENQQNQS[79.9663]SDPEEEK	K	G	29	45	17	2	10S(79.9663)	sp|O43491|E41L2_HUMAN	O43491	E41L2_HUMAN	EPB41L2	Band 4.1-like protein 2			1	0	MS/MS	STY:79.9663@EVAENQQNQS(0.5000)S(0.5000)DPEEEK;
EVDGLLTSEPMGSPVSSK	EVDGLLT[79.9663]SEPMGSPVSSK	K	T	582	599	18	2	7T(79.9663)	sp|Q8WWM7|ATX2L_HUMAN	Q8WWM7	ATX2L_HUMAN	ATXN2L	Ataxin-2-like protein			1	7567646	MS/MS	STY:79.9663@EVDGLLT(0.9297)S(0.0229)EPMGS(0.0148)PVS(0.0130)S(0.0196)K;
EVDPSTGELQSLQMPESEGPSSLDPSQEGPTGLK	EVDPSTGELQSLQMPESEGPSSLDPSQEGPT[79.9663]GLK	K	E	345	378	34	3	31T(79.9663)	sp|Q13501|SQSTM_HUMAN	Q13501	SQSTM_HUMAN	SQSTM1	Sequestosome-1			1	6.4721944E7	MS/MS	STY:79.9663@EVDPS(0.0252)T(0.0295)GELQS(0.0528)LQMPES(0.1089)EGPS(0.1689)S(0.1689)LDPS(0.1687)QEGPT(0.2772)GLK;
EVDPSTGELQSLQMPESEGPSSLDPSQEGPTGLK	EVDPSTGELQSLQMPESEGPSSLDPS[79.9663]QEGPTGLK	K	E	345	378	34	3,4	26S(79.9663)	sp|Q13501|SQSTM_HUMAN	Q13501	SQSTM_HUMAN	SQSTM1	Sequestosome-1			2	3.6834376E7	MS/MS	STY:79.9663@EVDPS(0.0271)T(0.0271)GELQS(0.0078)LQMPES(0.0080)EGPS(0.0124)S(0.0124)LDPS(0.8965)QEGPT(0.0086)GLK;
EVDPSTGELQSLQMPESEGPSSLDPSQEGPTGLK	EVDPSTGELQS[79.9663]LQMPESEGPSSLDPSQEGPTGLK	K	E	345	378	34	3	11S(79.9663)	sp|Q13501|SQSTM_HUMAN	Q13501	SQSTM_HUMAN	SQSTM1	Sequestosome-1			1	6.4721944E7	MS/MS	STY:79.9663@EVDPS(0.0045)T(0.0045)GELQS(0.4462)LQMPES(0.1771)EGPS(0.1771)S(0.1771)LDPS(0.0070)QEGPT(0.0065)GLK;
EVEDKESEGEEEDEDEDLSK	EVEDKES[79.9663]EGEEEDEDEDLSK	K	Y	147	166	20	3	7S(79.9663)	sp|O95218|ZRAB2_HUMAN	O95218	ZRAB2_HUMAN	ZRANB2	Zinc finger Ran-binding domain-containing protein 2			2	3.09138e+06	MS/MS	STY:79.9663@EVEDKES(0.9444)EGEEEDEDEDLS(0.0556)K;
EVQAEQPSSSSPR	EVQAEQPSS[79.9663]SSPR	R	R	178	190	13	2	9S(79.9663)	sp|Q9Y388|RBMX2_HUMAN	Q9Y388	RBMX2_HUMAN	RBMX2	RNA-binding motif protein, X-linked 2			1	1.94638e+06	MS/MS	STY:79.9663@EVQAEQPS(0.0226)S(0.3258)S(0.3258)S(0.3258)PR;
EVQAEQPSSSSPR	EVQAEQPS[79.9663]SSSPR	R	R	178	190	13	2	8S(79.9663)	sp|Q9Y388|RBMX2_HUMAN	Q9Y388	RBMX2_HUMAN	RBMX2	RNA-binding motif protein, X-linked 2			2	1.94638e+06	MS/MS	STY:79.9663@EVQAEQPS(0.6820)S(0.1060)S(0.1060)S(0.1060)PR;
EVSSLEGSPPPCLGQEEAVCTK	EVSSLEGS[79.9663]PPPC[57.0215]LGQEEAVC[57.0215]TK	K	I	1388	1409	22	3	12C(57.0215),20C(57.0215),8S(79.9663)	sp|Q02952|AKA12_HUMAN	Q02952	AKA12_HUMAN	AKAP12	A-kinase anchor protein 12			1	0	MS/MS	STY:79.9663@EVS(0.0624)S(0.0624)LEGS(0.8570)PPPCLGQEEAVCT(0.0181)K;
EVSDDEAEEK	EVS[79.9663]DDEAEEK	K	E	229	238	10	2	3S(79.9663)	sp|P07900|HS90A_HUMAN	P07900	HS90A_HUMAN	HSP90AA1	Heat shock protein HSP 90-alpha			7	1.3960128E8	MS/MS	STY:79.9663@EVS(1.0000)DDEAEEK;
EVSDSEAGGGPQGER	EVS[79.9663]DSEAGGGPQGER	R	K	368	382	15	2	3S(79.9663)	sp|Q9BW71|HIRP3_HUMAN	Q9BW71	HIRP3_HUMAN	HIRIP3	HIRA-interacting protein 3			1	3.73313e+06	MS/MS	STY:79.9663@EVS(0.5000)DS(0.5000)EAGGGPQGER;
EVTPESGPPK	EVTPES[79.9663]GPPK	K	V	193	202	10	2	6S(79.9663)	sp|P46087|NOP2_HUMAN	P46087	NOP2_HUMAN	NOP2	28S rRNA (cytosine(4447)-C(5))-methyltransferase			1	4.02898e+06	MS/MS	STY:79.9663@EVT(0.0614)PES(0.9386)GPPK;
EVVKPVPITSPAVSK	EVVKPVPITS[79.9663]PAVSK	K	V	102	116	15	2	10S(79.9663)	sp|Q96HC4|PDLI5_HUMAN	Q96HC4	PDLI5_HUMAN	PDLIM5	PDZ and LIM domain protein 5			1	2.04086e+06	MS/MS	STY:79.9663@EVVKPVPIT(0.0225)S(0.5055)PAVS(0.4720)K;
EVVKPVPITSPAVSK	EVVKPVPIT[79.9663]SPAVSK	K	V	102	116	15	2	9T(79.9663)	sp|Q96HC4|PDLI5_HUMAN	Q96HC4	PDLI5_HUMAN	PDLIM5	PDZ and LIM domain protein 5			1	2.04086e+06	MS/MS	STY:79.9663@EVVKPVPIT(0.4902)S(0.4902)PAVS(0.0196)K;
EWYQSTIPQSPSPAPDDPEEGR	EWYQSTIPQS[79.9663]PSPAPDDPEEGR	R	Q	706	727	22	3	10S(79.9663)	sp|Q08499|PDE4D_HUMAN	Q08499	PDE4D_HUMAN	PDE4D	3',5'-cyclic-AMP phosphodiesterase 4D			1	2.96604e+06	MS/MS	STY:79.9663@EWY(0.2147)QS(0.2147)T(0.2147)IPQS(0.3502)PS(0.0058)PAPDDPEEGR;
EYIPGQPPLSQSSDSSPTR	EYIPGQPPLSQS[79.9663]SDSSPTR	K	N	871	889	19	2	12S(79.9663)	sp|P07814|SYEP_HUMAN	P07814	SYEP_HUMAN	EPRS1	Bifunctional glutamate/proline--tRNA ligase			1	1.3390954E7	MS/MS	STY:79.9663@EY(0.1869)IPGQPPLS(0.0035)QS(0.2017)S(0.2017)DS(0.2017)S(0.2017)PT(0.0029)R;
EYIPGQPPLSQSSDSSPTR	EYIPGQPPLS[79.9663]QSSDSSPTR	K	N	871	889	19	2,3	10S(79.9663)	sp|P07814|SYEP_HUMAN	P07814	SYEP_HUMAN	EPRS1	Bifunctional glutamate/proline--tRNA ligase			3	2.6038866E7	MS/MS	STY:79.9663@EY(0.0302)IPGQPPLS(0.9250)QS(0.0090)S(0.0090)DS(0.0089)S(0.0089)PT(0.0089)R;
EYIPGQPPLSQSSDSSPTR	EY[79.9663]IPGQPPLSQSSDSSPTR	K	N	871	889	19	2	2Y(79.9663)	sp|P07814|SYEP_HUMAN	P07814	SYEP_HUMAN	EPRS1	Bifunctional glutamate/proline--tRNA ligase			1	2.3058094E7	MS/MS	STY:79.9663@EY(0.6624)IPGQPPLS(0.0324)QS(0.0324)S(0.0324)DS(0.0324)S(0.1040)PT(0.1040)R;
FASDDEHDEHDENGATGPVK	FASDDEHDEHDENGAT[79.9663]GPVK	K	R	364	383	20	2,3	16T(79.9663)	sp|P05455|LA_HUMAN	P05455	LA_HUMAN	SSB	Lupus La protein			3	3.8189084E7	MS/MS	STY:79.9663@FAS(0.0975)DDEHDEHDENGAT(0.9025)GPVK;
FASDDEHDEHDENGATGPVK	FAS[79.9663]DDEHDEHDENGATGPVK	K	R	364	383	20	3	3S(79.9663)	sp|P05455|LA_HUMAN	P05455	LA_HUMAN	SSB	Lupus La protein			14	3.6524928E7	MS/MS	STY:79.9663@FAS(0.9471)DDEHDEHDENGAT(0.0529)GPVK;
FEEAVTSYQK	FEEAVTS[79.9663]YQK	K	A	169	178	10	2	7S(79.9663)	sp|Q96EQ0|SGTB_HUMAN	Q96EQ0	SGTB_HUMAN	SGTB	Small glutamine-rich tetratricopeptide repeat-containing protein beta			1	2.78578e+06	MS/MS	STY:79.9663@FEEAVT(0.0265)S(0.9205)Y(0.0530)QK;
FEEESKEPVADEEEEDSDDDVEPITEFR	FEEESKEPVADEEEEDS[79.9663]DDDVEPITEFR	K	F	86	113	28	3	17S(79.9663)	sp|P54105|ICLN_HUMAN	P54105	ICLN_HUMAN	CLNS1A	Methylosome subunit pICln			1	3944874	MS/MS	STY:79.9663@FEEES(0.0748)KEPVADEEEEDS(0.8962)DDDVEPIT(0.0290)EFR;
FICVTPTTCSNTIDLPMSPR	FIC[57.0215]VTPTTC[57.0215]SNTIDLPMS[79.9663]PR	K	T	710	729	20	3	18S(79.9663),3C(57.0215),9C(57.0215)	sp|P40763|STAT3_HUMAN	P40763	STAT3_HUMAN	STAT3	Signal transducer and activator of transcription 3			1	3130246	MS/MS	STY:79.9663@FICVT(0.0116)PT(0.0116)T(0.0116)CS(0.0116)NT(0.0120)IDLPMS(0.9415)PR;
FIQELSGSSPK	FIQELS[79.9663]GSSPK	R	R	116	126	11	2	6S(79.9663)	sp|Q01664|TFAP4_HUMAN	Q01664	TFAP4_HUMAN	TFAP4	Transcription factor AP-4			1	0	MS/MS	STY:79.9663@FIQELS(0.3333)GS(0.3333)S(0.3333)PK;
FNDSEGDDTEETEDYR	FNDSEGDDT[79.9663]EETEDYR	K	Q	394	409	16	2	9T(79.9663)	sp|Q9NYF8|BCLF1_HUMAN	Q9NYF8	BCLF1_HUMAN	BCLAF1	Bcl-2-associated transcription factor 1			1	0	MS/MS	STY:79.9663@FNDS(0.0158)EGDDT(0.5390)EET(0.4195)EDY(0.0257)R;
FNDSEGDDTEETEDYR	FNDS[79.9663]EGDDTEETEDYR	K	Q	394	409	16	2	4S(79.9663)	sp|Q9NYF8|BCLF1_HUMAN	Q9NYF8	BCLF1_HUMAN	BCLAF1	Bcl-2-associated transcription factor 1			1	0	MS/MS	STY:79.9663@FNDS(0.8067)EGDDT(0.0301)EET(0.0816)EDY(0.0816)R;
FNEEHIPDSPFVVPVASPSGDAR	FNEEHIPDSPFVVPVASPS[79.9663]GDAR	K	R	2311	2333	23	3	19S(79.9663)	sp|P21333|FLNA_HUMAN	P21333	FLNA_HUMAN	FLNA	Filamin-A			1	4.10945e+06	MS/MS	STY:79.9663@FNEEHIPDS(0.0399)PFVVPVAS(0.0399)PS(0.9202)GDAR;
FNEEHIPDSPFVVPVASPSGDAR	FNEEHIPDSPFVVPVAS[79.9663]PSGDAR	K	R	2311	2333	23	3	17S(79.9663)	sp|P21333|FLNA_HUMAN	P21333	FLNA_HUMAN	FLNA	Filamin-A			2	4.10945e+06	MS/MS	STY:79.9663@FNEEHIPDS(0.2678)PFVVPVAS(0.7121)PS(0.0201)GDAR;
FPGDQVVNGAGPELSTGPSPGSPTLDIDQSIEQLNR	FPGDQVVNGAGPELSTGPSPGS[79.9663]PTLDIDQSIEQLNR	R	L	669	704	36	3	22S(79.9663)	sp|Q68CZ2|TENS3_HUMAN	Q68CZ2	TENS3_HUMAN	TNS3	Tensin-3			1	0	MS/MS	STY:79.9663@FPGDQVVNGAGPELS(0.0136)T(0.0136)GPS(0.0136)PGS(0.9280)PT(0.0162)LDIDQS(0.0152)IEQLNR;
FSGEEGEIEDDESGTENREEK	FSGEEGEIEDDES[79.9663]GTENREEK	K	D	927	947	21	3	13S(79.9663)	sp|Q9Y2W1|TR150_HUMAN	Q9Y2W1	TR150_HUMAN	THRAP3	Thyroid hormone receptor-associated protein 3			1	2.18944e+06	MS/MS	STY:79.9663@FS(0.0179)GEEGEIEDDES(0.4910)GT(0.4910)ENREEK;
FSGEEGEIEDDESGTENREEK	FS[79.9663]GEEGEIEDDESGTENREEK	K	D	927	947	21	3	2S(79.9663)	sp|Q9Y2W1|TR150_HUMAN	Q9Y2W1	TR150_HUMAN	THRAP3	Thyroid hormone receptor-associated protein 3			1	2.18944e+06	MS/MS	STY:79.9663@FS(0.4295)GEEGEIEDDES(0.2852)GT(0.2852)ENREEK;
FSPVLGR	FS[79.9663]PVLGR	R	A	494	500	7	2	2S(79.9663)	sp|Q9NRG9|AAAS_HUMAN	Q9NRG9	AAAS_HUMAN	AAAS	Aladin			2	2.15033e+06	MS/MS	STY:79.9663@FS(1.0000)PVLGR;
FTVETRGAGTGGLGLAIEGPSEAK	FT[79.9663]VETRGAGTGGLGLAIEGPS[79.9663]EAK	R	M	1371	1394	24	4	21S(79.9663),2T(79.9663)	sp|Q14315|FLNC_HUMAN	Q14315	FLNC_HUMAN	FLNC	Filamin-C			1	0	MS/MS	STY:79.9663@FT(0.5945)VET(0.4726)RGAGT(0.3512)GGLGLAIEGPS(0.5817)EAK;
FVSEGDGGR	FVS[79.9663]EGDGGR	R	L	455	463	9	2	3S(79.9663)	sp|Q53EL6|PDCD4_HUMAN	Q53EL6	PDCD4_HUMAN	PDCD4	Programmed cell death protein 4			2	6800129	MS/MS	STY:79.9663@FVS(1.0000)EGDGGR;
GAAAAATGQPGTAPAGTPGAPPLAGMAIVK	GAAAAATGQPGTAPAGT[79.9663]PGAPPLAGMAIVK	R	E	525	554	30	3	17T(79.9663)	sp|Q13263|TIF1B_HUMAN	Q13263	TIF1B_HUMAN	TRIM28	Transcription intermediary factor 1-beta			2	0	MS/MS	STY:79.9663@GAAAAAT(0.0314)GQPGT(0.0366)APAGT(0.9320)PGAPPLAGMAIVK;
GADNDGSGSESGYTTPK	GADNDGSGSESGYT[79.9663]TPK	K	K	206	222	17	2	14T(79.9663)	sp|Q7Z417|NUFP2_HUMAN	Q7Z417	NUFP2_HUMAN	NUFIP2	FMR1-interacting protein NUFIP2			1	0	MS/MS	STY:79.9663@GADNDGS(0.2751)GS(0.0184)ES(0.0184)GY(0.0184)T(0.3348)T(0.3348)PK;
GAGATSGSPPAGR	GAGAT[79.9663]SGSPPAGR	K	N	194	206	13	2	5T(79.9663)	sp|P16455|MGMT_HUMAN	P16455	MGMT_HUMAN	MGMT	Methylated-DNA--protein-cysteine methyltransferase			1	693952	MS/MS	STY:79.9663@GAGAT(0.3333)S(0.3333)GS(0.3333)PPAGR;
GAGDGSDEEVDGK	GAGDGS[79.9663]DEEVDGK	K	A	1938	1950	13	2	6S(79.9663)	sp|P35579|MYH9_HUMAN	P35579	MYH9_HUMAN	MYH9	Myosin-9			6	3.7232644E7	MS/MS	STY:79.9663@GAGDGS(1.0000)DEEVDGK;
GAPSSPATGVLPSPQGK	GAPS[79.9663]SPATGVLPSPQGK	R	S	1705	1721	17	2	4S(79.9663)	sp|Q5SRE5|NU188_HUMAN	Q5SRE5	NU188_HUMAN	NUP188	Nucleoporin NUP188			2	2.73415e+06	MS/MS	STY:79.9663@GAPS(0.9131)S(0.0350)PAT(0.0350)GVLPS(0.0170)PQGK;
GDEASEEGQNGSSPK	GDEASEEGQNGS[79.9663]SPK	R	S	453	467	15	2	12S(79.9663)	sp|P35611|ADDA_HUMAN	P35611	ADDA_HUMAN	ADD1	Alpha-adducin			1	0	MS/MS	STY:79.9663@GDEAS(0.0163)EEGQNGS(0.4918)S(0.4918)PK;
GDPPRLSPDPVAGSAVSQELR	GDPPRLSPDPVAGS[79.9663]AVSQELR	R	E	48	68	21	3	14S(79.9663)	sp|Q9BUR4|TCAB1_HUMAN	Q9BUR4	TCAB1_HUMAN	WRAP53	Telomerase Cajal body protein 1			1	2.07621e+06	MS/MS	STY:79.9663@GDPPRLS(0.3905)PDPVAGS(0.5356)AVS(0.0739)QELR;
GDPPRLSPDPVAGSAVSQELR	GDPPRLS[79.9663]PDPVAGSAVSQELR	R	E	48	68	21	3	7S(79.9663)	sp|Q9BUR4|TCAB1_HUMAN	Q9BUR4	TCAB1_HUMAN	WRAP53	Telomerase Cajal body protein 1			3	3.55974e+06	MS/MS	STY:79.9663@GDPPRLS(0.9457)PDPVAGS(0.0272)AVS(0.0272)QELR;
GDSESEEDEDLEVPVPSR	GDS[79.9663]ESEEDEDLEVPVPS[79.9663]R	K	F	76	93	18	2	17S(79.9663),3S(79.9663)	sp|P13861|KAP2_HUMAN	P13861	KAP2_HUMAN	PRKAR2A	cAMP-dependent protein kinase type II-alpha regulatory subunit			1	0	MS/MS	STY:79.9663@GDS(0.6565)ES(0.6565)EEDEDLEVPVPS(0.6870)R;
GDVTAEEAAGASPAK	GDVTAEEAAGAS[79.9663]PAK	R	A	11	25	15	2	12S(79.9663)	sp|P49006|MRP_HUMAN	P49006	MRP_HUMAN	MARCKSL1	MARCKS-related protein			1	1.62446e+06	MS/MS	STY:79.9663@GDVT(0.0729)AEEAAGAS(0.9271)PAK;
GEAAAERPGEAAVASSPSK	GEAAAERPGEAAVASSPS[79.9663]K	K	A	12	30	19	2	18S(79.9663)	sp|P29966|MARCS_HUMAN	P29966	MARCS_HUMAN	MARCKS	Myristoylated alanine-rich C-kinase substrate			1	8.18666e+06	MS/MS	STY:79.9663@GEAAAERPGEAAVAS(0.0344)S(0.0344)PS(0.9313)K;
GEAAAERPGEAAVASSPSK	GEAAAERPGEAAVAS[79.9663]SPSK	K	A	12	30	19	2,3	15S(79.9663)	sp|P29966|MARCS_HUMAN	P29966	MARCS_HUMAN	MARCKS	Myristoylated alanine-rich C-kinase substrate			7	1.1447957E7	MS/MS	STY:79.9663@GEAAAERPGEAAVAS(0.4768)S(0.4768)PS(0.0465)K;
GEDSAEETEAK	GEDS[79.9663]AEETEAK	K	P	479	489	11	2	4S(79.9663)	sp|Q12906|ILF3_HUMAN	Q12906	ILF3_HUMAN	ILF3	Interleukin enhancer-binding factor 3			2	1.0184049E7	MS/MS	STY:79.9663@GEDS(0.9465)AEET(0.0535)EAK;
GEFSASPMLK	GEFSAS[79.9663]PMLK	R	S	1119	1128	10	2	6S(79.9663)	sp|Q9UQ35|SRRM2_HUMAN	Q9UQ35	SRRM2_HUMAN	SRRM2	Serine/arginine repetitive matrix protein 2			1	8772210	MS/MS	STY:79.9663@GEFS(0.0509)AS(0.9491)PMLK;
GEFSASPMLK	GEFS[79.9663]ASPMLK	R	S	1119	1128	10	2	4S(79.9663)	sp|Q9UQ35|SRRM2_HUMAN	Q9UQ35	SRRM2_HUMAN	SRRM2	Serine/arginine repetitive matrix protein 2			2	8772210	MS/MS	STY:79.9663@GEFS(0.9389)AS(0.0611)PMLK;
GEGDAPFSEPGTTSTQRPSSPETATK	GEGDAPFSEPGTTSTQRPSSPET[79.9663]ATK	R	Q	304	329	26	3	23T(79.9663)	sp|Q9UQ35|SRRM2_HUMAN	Q9UQ35	SRRM2_HUMAN	SRRM2	Serine/arginine repetitive matrix protein 2			1	1.6030868E7	MS/MS	STY:79.9663@GEGDAPFS(0.0059)EPGT(0.0060)T(0.0061)S(0.0061)T(0.0061)QRPS(0.0062)S(0.0062)PET(0.4787)AT(0.4787)K;
GEGDAPFSEPGTTSTQRPSSPETATK	GEGDAPFSEPGTTSTQRPS[79.9663]SPETATK	R	Q	304	329	26	3	19S(79.9663)	sp|Q9UQ35|SRRM2_HUMAN	Q9UQ35	SRRM2_HUMAN	SRRM2	Serine/arginine repetitive matrix protein 2			2	2.3334234E7	MS/MS	STY:79.9663@GEGDAPFS(0.0064)EPGT(0.0112)T(0.0112)S(0.0112)T(0.0112)QRPS(0.4664)S(0.4664)PET(0.0073)AT(0.0088)K;
GEGDAPFSEPGTTSTQRPSSPETATK	GEGDAPFS[79.9663]EPGTTSTQRPSSPETATK	R	Q	304	329	26	3	8S(79.9663)	sp|Q9UQ35|SRRM2_HUMAN	Q9UQ35	SRRM2_HUMAN	SRRM2	Serine/arginine repetitive matrix protein 2			3	2.3334234E7	MS/MS	STY:79.9663@GEGDAPFS(0.9297)EPGT(0.0092)T(0.0092)S(0.0092)T(0.0092)QRPS(0.0083)S(0.0083)PET(0.0083)AT(0.0083)K;
GEPAAAAAPEAGASPVEK	GEPAAAAAPEAGAS[79.9663]PVEK	K	E	88	105	18	2,3	14S(79.9663)	sp|P29966|MARCS_HUMAN	P29966	MARCS_HUMAN	MARCKS	Myristoylated alanine-rich C-kinase substrate			6	1.4850796E7	MS/MS	STY:79.9663@GEPAAAAAPEAGAS(1.0000)PVEK;
GEPNVSYICSR	GEPNVSYIC[57.0215]S[79.9663]R	R	Y	210	220	11	2	10S(79.9663),9C(57.0215)	sp|P49841|GSK3B_HUMAN	P49841	GSK3B_HUMAN	GSK3B	Glycogen synthase kinase-3 beta	GSK3A	sp|P49840|GSK3A_HUMAN	2	1.1462976E7	MS/MS	STY:79.9663@GEPNVS(0.0276)Y(0.0276)ICS(0.9448)R;
GEPNVSYICSR	GEPNVS[79.9663]YIC[57.0215]SR	R	Y	210	220	11	2	6S(79.9663),9C(57.0215)	sp|P49841|GSK3B_HUMAN	P49841	GSK3B_HUMAN	GSK3B	Glycogen synthase kinase-3 beta	GSK3A	sp|P49840|GSK3A_HUMAN	4	1.5163279E7	MS/MS	STY:79.9663@GEPNVS(0.4919)Y(0.4919)ICS(0.0163)R;
GEQVSQNGLPAEQGSPR	GEQVSQNGLPAEQGS[79.9663]PR	K	M	2124	2140	17	2,3	15S(79.9663)	sp|Q01082|SPTB2_HUMAN	Q01082	SPTB2_HUMAN	SPTBN1	Spectrin beta chain, non-erythrocytic 1			4	9160864	MS/MS	STY:79.9663@GEQVS(0.0657)QNGLPAEQGS(0.9343)PR;
GEVPPKETPK	GEVPPKET[79.9663]PK	K	K	78	87	10	2	8T(79.9663)	sp|P49006|MRP_HUMAN	P49006	MRP_HUMAN	MARCKSL1	MARCKS-related protein			1	0	MS/MS	STY:79.9663@GEVPPKET(1.0000)PK;
GFEEEHKDSDDDSSDDEQEK	GFEEEHKDS[79.9663]DDDS[79.9663]S[79.9663]DDEQEK	K	K	423	442	20	3	13S(79.9663),14S(79.9663),9S(79.9663)	sp|Q13435|SF3B2_HUMAN	Q13435	SF3B2_HUMAN	SF3B2	Splicing factor 3B subunit 2			2	2.5994e+06	MS/MS	STY:79.9663@GFEEEHKDS(1.0000)DDDS(1.0000)S(1.0000)DDEQEK;
GFGDGYNGYGGGPGGGNFGGSPGYGGGR	GFGDGY[79.9663]NGYGGGPGGGNFGGSPGYGGGR	R	G	239	266	28	3	6Y(79.9663)	sp|P22626|ROA2_HUMAN	P22626	ROA2_HUMAN	HNRNPA2B1	Heterogeneous nuclear ribonucleoproteins A2/B1			1	999693	MS/MS	STY:79.9663@GFGDGY(0.3621)NGY(0.3621)GGGPGGGNFGGS(0.2586)PGY(0.0172)GGGR;
GFGFGQGAGALVHSE	GFGFGQGAGALVHS[79.9663]E	K	-	179	193	15	2	14S(79.9663)	sp|P21291|CSRP1_HUMAN	P21291	CSRP1_HUMAN	CSRP1	Cysteine and glycine-rich protein 1			4	1.4587956E7	MS/MS	STY:79.9663@GFGFGQGAGALVHS(1.0000)E;
GFGSEEGSR	GFGSEEGS[79.9663]R	R	A	39	47	9	2	8S(79.9663)	sp|Q9Y5S9|RBM8A_HUMAN	Q9Y5S9	RBM8A_HUMAN	RBM8A	RNA-binding protein 8A			1	0	MS/MS	STY:79.9663@GFGS(0.0712)EEGS(0.9288)R;
GFSDSGGGPPAK	GFSDS[79.9663]GGGPPAK	R	Q	64	75	12	2	5S(79.9663)	sp|Q9H307|PININ_HUMAN	Q9H307	PININ_HUMAN	PNN	Pinin			1	5814238	MS/MS	STY:79.9663@GFS(0.0536)DS(0.9464)GGGPPAK;
GFSDSGGGPPAK	GFS[79.9663]DSGGGPPAK	R	Q	64	75	12	2	3S(79.9663)	sp|Q9H307|PININ_HUMAN	Q9H307	PININ_HUMAN	PNN	Pinin			1	5814238	MS/MS	STY:79.9663@GFS(0.5000)DS(0.5000)GGGPPAK;
GGAPDPSPGATATPGAPAQPSSPDAR	GGAPDPSPGATATPGAPAQPS[79.9663]SPDAR	R	R	505	530	26	3	21S(79.9663)	sp|O95365|ZBT7A_HUMAN	O95365	ZBT7A_HUMAN	ZBTB7A	Zinc finger and BTB domain-containing protein 7A			1	4.17989e+06	MS/MS	STY:79.9663@GGAPDPS(0.0829)PGAT(0.1966)AT(0.1761)PGAPAQPS(0.2722)S(0.2722)PDAR;
GGAPDPSPGATATPGAPAQPSSPDAR	GGAPDPSPGAT[79.9663]ATPGAPAQPSSPDAR	R	R	505	530	26	3	11T(79.9663)	sp|O95365|ZBT7A_HUMAN	O95365	ZBT7A_HUMAN	ZBTB7A	Zinc finger and BTB domain-containing protein 7A			1	4.17989e+06	MS/MS	STY:79.9663@GGAPDPS(0.0117)PGAT(0.4786)AT(0.4786)PGAPAQPS(0.0156)S(0.0156)PDAR;
GGGGDMAEPSEAGDAPPDDGPPGELGPDGPDGPEEK	GGGGDMAEPS[79.9663]EAGDAPPDDGPPGELGPDGPDGPEEK	R	G	311	346	36	3	10S(79.9663)	sp|P08621|RU17_HUMAN	P08621	RU17_HUMAN	SNRNP70	U1 small nuclear ribonucleoprotein 70 kDa			1	4.00247e+06	MS/MS	STY:79.9663@GGGGDMAEPS(1.0000)EAGDAPPDDGPPGELGPDGPDGPEEK;
GGLSPANDTGAK	GGLS[79.9663]PANDTGAK	R	K	44	55	12	2	4S(79.9663)	sp|P30419|NMT1_HUMAN	P30419	NMT1_HUMAN	NMT1	Glycylpeptide N-tetradecanoyltransferase 1			1	8860557	MS/MS	STY:79.9663@GGLS(0.9492)PANDT(0.0508)GAK;
GGNVFAALIQDQSEEEEEEEK	GGNVFAALIQDQS[79.9663]EEEEEEEK	K	H	128	148	21	3	13S(79.9663)	sp|Q8NE71|ABCF1_HUMAN	Q8NE71	ABCF1_HUMAN	ABCF1	ATP-binding cassette sub-family F member 1			1	0	MS/MS	STY:79.9663@GGNVFAALIQDQS(1.0000)EEEEEEEK;
GGTILGTRSLK	GGTILGT[79.9663]RS[79.9663]LK	K	G	120	130	11	2	7T(79.9663),9S(79.9663)	sp|Q9BWU0|NADAP_HUMAN	Q9BWU0	NADAP_HUMAN	SLC4A1AP	Kanadaptin			1	7.07066e+06	MS/MS	STY:79.9663@GGT(0.0967)ILGT(0.9517)RS(0.9517)LK;
GGVTGSPEASISGSK	GGVTGSPEASISGS[79.9663]K	K	G	5726	5740	15	2	14S(79.9663)	sp|Q09666|AHNK_HUMAN	Q09666	AHNK_HUMAN	AHNAK	Neuroblast differentiation-associated protein AHNAK			1	2.97093e+06	MS/MS	STY:79.9663@GGVT(0.0308)GS(0.0308)PEAS(0.0308)IS(0.0308)GS(0.8770)K;
GGVTGSPEASISGSK	GGVTGSPEASIS[79.9663]GSK	K	G	5726	5740	15	2	12S(79.9663)	sp|Q09666|AHNK_HUMAN	Q09666	AHNK_HUMAN	AHNAK	Neuroblast differentiation-associated protein AHNAK			1	1.1263556E7	MS/MS	STY:79.9663@GGVT(0.0108)GS(0.0108)PEAS(0.0108)IS(0.4838)GS(0.4838)K;
GGVTGSPEASISGSK	GGVTGS[79.9663]PEASISGSK	K	G	5726	5740	15	2	6S(79.9663)	sp|Q09666|AHNK_HUMAN	Q09666	AHNK_HUMAN	AHNAK	Neuroblast differentiation-associated protein AHNAK			1	1.1263556E7	MS/MS	STY:79.9663@GGVT(0.0130)GS(0.9355)PEAS(0.0144)IS(0.0144)GS(0.0227)K;
GGVTGSPEASISGSK	GGVT[79.9663]GSPEASISGSK	K	G	5726	5740	15	2	4T(79.9663)	sp|Q09666|AHNK_HUMAN	Q09666	AHNK_HUMAN	AHNAK	Neuroblast differentiation-associated protein AHNAK			1	1.1263556E7	MS/MS	STY:79.9663@GGVT(0.9437)GS(0.0146)PEAS(0.0131)IS(0.0143)GS(0.0143)K;
GHTASESDEQQWPEEK	GHT[79.9663]ASESDEQQWPEEK	R	R	1253	1268	16	2	3T(79.9663)	sp|Q9NTI5|PDS5B_HUMAN	Q9NTI5	PDS5B_HUMAN	PDS5B	Sister chromatid cohesion protein PDS5 homolog B			1	1342222	MS/MS	STY:79.9663@GHT(0.4900)AS(0.4900)ES(0.0199)DEQQWPEEK;
GHYEVTGSDDETGK	GHYEVTGS[79.9663]DDETGK	K	L	5834	5847	14	3	8S(79.9663)	sp|Q09666|AHNK_HUMAN	Q09666	AHNK_HUMAN	AHNAK	Neuroblast differentiation-associated protein AHNAK			1	1.9107e+06	MS/MS	STY:79.9663@GHY(0.0164)EVT(0.0164)GS(0.4836)DDET(0.4836)GK;
GHYEVTGSDDETGK	GHYEVT[79.9663]GSDDETGK	K	L	5834	5847	14	2	6T(79.9663)	sp|Q09666|AHNK_HUMAN	Q09666	AHNK_HUMAN	AHNAK	Neuroblast differentiation-associated protein AHNAK			1	5334066	MS/MS	STY:79.9663@GHY(0.1433)EVT(0.4110)GS(0.4110)DDET(0.0347)GK;
GHYEVTGSDDETGK	GHY[79.9663]EVTGSDDETGK	K	L	5834	5847	14	2	3Y(79.9663)	sp|Q09666|AHNK_HUMAN	Q09666	AHNK_HUMAN	AHNAK	Neuroblast differentiation-associated protein AHNAK			1	5668921	MS/MS	STY:79.9663@GHY(0.3064)EVT(0.3064)GS(0.3064)DDET(0.0808)GK;
GIPLATGDTSPEPELLPGAPLPPPK	GIPLATGDTS[79.9663]PEPELLPGAPLPPPK	K	E	33	57	25	3	10S(79.9663)	sp|O75821|EIF3G_HUMAN	O75821	EIF3G_HUMAN	EIF3G	Eukaryotic translation initiation factor 3 subunit G			2	1.0446218E7	MS/MS	STY:79.9663@GIPLAT(0.0773)GDT(0.0264)S(0.8963)PEPELLPGAPLPPPK;
GIPLATGDTSPEPELLPGAPLPPPK	GIPLATGDT[79.9663]SPEPELLPGAPLPPPK	K	E	33	57	25	3	9T(79.9663)	sp|O75821|EIF3G_HUMAN	O75821	EIF3G_HUMAN	EIF3G	Eukaryotic translation initiation factor 3 subunit G			1	2693146	MS/MS	STY:79.9663@GIPLAT(0.0198)GDT(0.4901)S(0.4901)PEPELLPGAPLPPPK;
GIPLATGDTSPEPELLPGAPLPPPK	GIPLAT[79.9663]GDTSPEPELLPGAPLPPPK	K	E	33	57	25	3	6T(79.9663)	sp|O75821|EIF3G_HUMAN	O75821	EIF3G_HUMAN	EIF3G	Eukaryotic translation initiation factor 3 subunit G			3	1.6363345E7	MS/MS	STY:79.9663@GIPLAT(0.9467)GDT(0.0266)S(0.0266)PEPELLPGAPLPPPK;
GKLPESPK	GKLPES[79.9663]PK	R	R	479	486	8	2	6S(79.9663)	sp|P17480|UBF1_HUMAN	P17480	UBF1_HUMAN	UBTF	Nucleolar transcription factor 1			1	1.37038e+06	MS/MS	STY:79.9663@GKLPES(1.0000)PK;
GKTPEEIR	GKT[79.9663]PEEIR	K	K	129	136	8	2	3T(79.9663)	sp|P63208|SKP1_HUMAN	P63208	SKP1_HUMAN	SKP1	S-phase kinase-associated protein 1			1	1.55124e+06	MS/MS	STY:79.9663@GKT(1.0000)PEEIR;
GKTPEEIRK	GKT[79.9663]PEEIRK	K	T	129	137	9	2,3	3T(79.9663)	sp|P63208|SKP1_HUMAN	P63208	SKP1_HUMAN	SKP1	S-phase kinase-associated protein 1			2	3.12562e+06	MS/MS	STY:79.9663@GKT(1.0000)PEEIRK;
GLAEVQQDGEAEEGATSDGEK	GLAEVQQDGEAEEGAT[79.9663]SDGEK	K	K	582	602	21	2	16T(79.9663)	sp|Q02952|AKA12_HUMAN	Q02952	AKA12_HUMAN	AKAP12	A-kinase anchor protein 12			1	3.53053e+06	MS/MS	STY:79.9663@GLAEVQQDGEAEEGAT(0.5000)S(0.5000)DGEK;
GLGPPSPPAPPR	GLGPPS[79.9663]PPAPPR	R	G	90	101	12	2	6S(79.9663)	sp|Q13425|SNTB2_HUMAN	Q13425	SNTB2_HUMAN	SNTB2	Beta-2-syntrophin			2	4.20565e+06	MS/MS	STY:79.9663@GLGPPS(1.0000)PPAPPR;
GLLAQGLRPESPPPAGPLLNGAPAGESPQPK	GLLAQGLRPESPPPAGPLLNGAPAGES[79.9663]PQPK	R	A	655	685	31	3,4	27S(79.9663)	sp|Q96TA1|NIBA2_HUMAN	Q96TA1	NIBA2_HUMAN	NIBAN2	Protein Niban 2			5	1.05281344E8	MS/MS	STY:79.9663@GLLAQGLRPES(0.0510)PPPAGPLLNGAPAGES(0.9490)PQPK;
GLLAQGLRPESPPPAGPLLNGAPAGESPQPK	GLLAQGLRPES[79.9663]PPPAGPLLNGAPAGESPQPK	R	A	655	685	31	3	11S(79.9663)	sp|Q96TA1|NIBA2_HUMAN	Q96TA1	NIBA2_HUMAN	NIBAN2	Protein Niban 2			12	1.00079376E8	MS/MS	STY:79.9663@GLLAQGLRPES(0.9464)PPPAGPLLNGAPAGES(0.0536)PQPK;
GLNVIGASDQSPLQSPSNLR	GLNVIGASDQSPLQS[79.9663]PSNLR	K	D	923	942	20	3	15S(79.9663)	sp|Q9HAU0|PKHA5_HUMAN	Q9HAU0	PKHA5_HUMAN	PLEKHA5	Pleckstrin homology domain-containing family A member 5			1	0	MS/MS	STY:79.9663@GLNVIGAS(0.0447)DQS(0.1866)PLQS(0.3843)PS(0.3843)NLR;
GNDPLTSSPGR	GNDPLTSS[79.9663]PGR	R	S	20	30	11	2	8S(79.9663)	sp|P49736|MCM2_HUMAN	P49736	MCM2_HUMAN	MCM2	DNA replication licensing factor MCM2			2	2.136061E7	MS/MS	STY:79.9663@GNDPLT(0.0270)S(0.0260)S(0.9470)PGR;
GNDPLTSSPGR	GNDPLTS[79.9663]SPGR	R	S	20	30	11	2	7S(79.9663)	sp|P49736|MCM2_HUMAN	P49736	MCM2_HUMAN	MCM2	DNA replication licensing factor MCM2			1	2.8741798E7	MS/MS	STY:79.9663@GNDPLT(0.0160)S(0.4920)S(0.4920)PGR;
GNDPLTSSPGR	GNDPLT[79.9663]SSPGR	R	S	20	30	11	2	6T(79.9663)	sp|P49736|MCM2_HUMAN	P49736	MCM2_HUMAN	MCM2	DNA replication licensing factor MCM2			7	3.3362772E7	MS/MS	STY:79.9663@GNDPLT(0.8046)S(0.0977)S(0.0977)PGR;
GNDSDGEGESDDPEK	GNDS[79.9663]DGEGESDDPEK	K	K	99	113	15	2	4S(79.9663)	sp|O75351|VPS4B_HUMAN	O75351	VPS4B_HUMAN	VPS4B	Vacuolar protein sorting-associated protein 4B			1	0	MS/MS	STY:79.9663@GNDS(0.5000)DGEGES(0.5000)DDPEK;
GNSPPSSGEACR	GNS[79.9663]PPSSGEAC[57.0215]R	K	E	184	195	12	2	11C(57.0215),3S(79.9663)	sp|P41227|NAA10_HUMAN	P41227	NAA10_HUMAN	NAA10	N-alpha-acetyltransferase 10			1	304908	MS/MS	STY:79.9663@GNS(0.9444)PPS(0.0278)S(0.0278)GEACR;
GNVVPSPLPTR	GNVVPSPLPT[79.9663]R	R	R	36	46	11	2	10T(79.9663)	sp|Q9Y2V2|CHSP1_HUMAN	Q9Y2V2	CHSP1_HUMAN	CARHSP1	Calcium-regulated heat-stable protein 1			1	0	MS/MS	STY:79.9663@GNVVPS(0.0524)PLPT(0.9476)R;
GNVVPSPLPTR	GNVVPS[79.9663]PLPTR	R	R	36	46	11	2	6S(79.9663)	sp|Q9Y2V2|CHSP1_HUMAN	Q9Y2V2	CHSP1_HUMAN	CARHSP1	Calcium-regulated heat-stable protein 1			5	4.14539e+06	MS/MS	STY:79.9663@GNVVPS(0.9474)PLPT(0.0526)R;
GPAGEAGASPPVR	GPAGEAGAS[79.9663]PPVR	R	R	102	114	13	2	9S(79.9663)	sp|Q13425|SNTB2_HUMAN	Q13425	SNTB2_HUMAN	SNTB2	Beta-2-syntrophin			3	3322099	MS/MS	STY:79.9663@GPAGEAGAS(1.0000)PPVR;
GPDEAMEDGEEGSDDEAEWVVTK	GPDEAMEDGEEGSDDEAEWVVT[79.9663]K	R	D	426	448	23	3	22T(79.9663)	sp|Q9NZN4|EHD2_HUMAN	Q9NZN4	EHD2_HUMAN	EHD2	EH domain-containing protein 2			1	0	MS/MS	STY:79.9663@GPDEAMEDGEEGS(0.2715)DDEAEWVVT(0.7285)K;
GPLPAAPPVAPERQPSWDPSPVSSTVPAPSPLSAAAVSPSK	GPLPAAPPVAPERQPS[79.9663]WDPSPVSSTVPAPSPLSAAAVSPSK	R	L	92	132	41	3,4	16S(79.9663)	sp|Q9NQC3|RTN4_HUMAN	Q9NQC3	RTN4_HUMAN	RTN4	Reticulon-4			2	0	MS/MS	STY:79.9663@GPLPAAPPVAPERQPS(0.7169)WDPS(0.0606)PVS(0.0606)S(0.0606)T(0.0606)VPAPS(0.0095)PLS(0.0126)AAAVS(0.0094)PS(0.0094)K;
GPPASSPAPAPK	GPPASS[79.9663]PAPAPK	R	F	254	265	12	2	6S(79.9663)	sp|Q15942|ZYX_HUMAN	Q15942	ZYX_HUMAN	ZYX	Zyxin			1	785268	MS/MS	STY:79.9663@GPPAS(0.0745)S(0.9255)PAPAPK;
GPPDFSSDEEREPTPVLGSGAAAAGR	GPPDFSSDEEREPTPVLGS[79.9663]GAAAAGR	K	S	61	86	26	3	19S(79.9663)	sp|P42166|LAP2A_HUMAN	P42166	LAP2A_HUMAN	TMPO	Lamina-associated polypeptide 2, isoform alpha		sp|P42167|LAP2B_HUMAN	1	5519273	MS/MS	STY:79.9663@GPPDFS(0.1728)S(0.1728)DEEREPT(0.1346)PVLGS(0.5198)GAAAAGR;
GPPDFSSDEEREPTPVLGSGAAAAGR	GPPDFSSDEEREPT[79.9663]PVLGSGAAAAGR	K	S	61	86	26	3	14T(79.9663)	sp|P42166|LAP2A_HUMAN	P42166	LAP2A_HUMAN	TMPO	Lamina-associated polypeptide 2, isoform alpha		sp|P42167|LAP2B_HUMAN	8	2.292754E7	MS/MS	STY:79.9663@GPPDFS(0.0186)S(0.0217)DEEREPT(0.9387)PVLGS(0.0210)GAAAAGR;
GPPDFSSDEEREPTPVLGSGAAAAGR	GPPDFSS[79.9663]DEEREPTPVLGSGAAAAGR	K	S	61	86	26	3	7S(79.9663)	sp|P42166|LAP2A_HUMAN	P42166	LAP2A_HUMAN	TMPO	Lamina-associated polypeptide 2, isoform alpha		sp|P42167|LAP2B_HUMAN	1	1.57697e+06	MS/MS	STY:79.9663@GPPDFS(0.0138)S(0.4865)DEEREPT(0.4865)PVLGS(0.0132)GAAAAGR;
GPPDFSSDEEREPTPVLGSGAAAAGR	GPPDFS[79.9663]SDEEREPTPVLGSGAAAAGR	K	S	61	86	26	3	6S(79.9663)	sp|P42166|LAP2A_HUMAN	P42166	LAP2A_HUMAN	TMPO	Lamina-associated polypeptide 2, isoform alpha		sp|P42167|LAP2B_HUMAN	5	1.4461878E7	MS/MS	STY:79.9663@GPPDFS(0.4883)S(0.4883)DEEREPT(0.0118)PVLGS(0.0115)GAAAAGR;
GPSWDPFR	GPS[79.9663]WDPFR	R	D	13	20	8	2	3S(79.9663)	sp|P04792|HSPB1_HUMAN	P04792	HSPB1_HUMAN	HSPB1	Heat shock protein beta-1			5	3.7442836E7	MS/MS	STY:79.9663@GPS(1.0000)WDPFR;
GPVSPSVSFQPLAR	GPVSPS[79.9663]VSFQPLAR	R	S	219	232	14	2	6S(79.9663)	sp|Q7Z434|MAVS_HUMAN	Q7Z434	MAVS_HUMAN	MAVS	Mitochondrial antiviral-signaling protein			1	0	MS/MS	STY:79.9663@GPVS(0.0350)PS(0.9387)VS(0.0263)FQPLAR;
GQTPLTEGSEDLDGHSDPEESFAR	GQTPLT[79.9663]EGSEDLDGHSDPEESFAR	R	D	305	328	24	3	6T(79.9663)	sp|Q86VR2|RETR3_HUMAN	Q86VR2	RETR3_HUMAN	RETREG3	Reticulophagy regulator 3			1	1.9e+06	MS/MS	STY:79.9663@GQT(0.0407)PLT(0.4680)EGS(0.4680)EDLDGHS(0.0119)DPEES(0.0114)FAR;
GREDVSNFDDEFTSEAPILTPPREPR	GREDVSNFDDEFTSEAPILT[79.9663]PPREPR	R	I	939	964	26	3	20T(79.9663)	sp|Q16513|PKN2_HUMAN	Q16513	PKN2_HUMAN	PKN2	Serine/threonine-protein kinase N2			1	5.43929e+06	MS/MS	STY:79.9663@GREDVS(0.0363)NFDDEFT(0.1024)S(0.1024)EAPILT(0.7588)PPREPR;
GRLSPVPVPR	GRLS[79.9663]PVPVPR	R	A	132	141	10	2	4S(79.9663)	sp|Q9UKM9|RALY_HUMAN	Q9UKM9	RALY_HUMAN	RALY	RNA-binding protein Raly			6	1.4373085E7	MS/MS	STY:79.9663@GRLS(1.0000)PVPVPR;
GSVPLSSSPPATHFPDETEITNPVPK	GSVPLSSSPPATHFPDETEIT[79.9663]NPVPK	K	K	1386	1411	26	3	21T(79.9663)	sp|P11388|TOP2A_HUMAN	P11388	TOP2A_HUMAN	TOP2A	DNA topoisomerase 2-alpha			1	2.3773668E7	MS/MS	STY:79.9663@GS(0.1757)VPLS(0.1649)S(0.1649)S(0.1649)PPAT(0.1343)HFPDET(0.0027)EIT(0.1927)NPVPK;
GSVPLSSSPPATHFPDETEITNPVPK	GSVPLSSSPPAT[79.9663]HFPDETEITNPVPK	K	K	1386	1411	26	3	12T(79.9663)	sp|P11388|TOP2A_HUMAN	P11388	TOP2A_HUMAN	TOP2A	DNA topoisomerase 2-alpha			1	2.3773668E7	MS/MS	STY:79.9663@GS(0.0097)VPLS(0.0150)S(0.0281)S(0.0281)PPAT(0.5984)HFPDET(0.2590)EIT(0.0618)NPVPK;
GSVPLSSSPPATHFPDETEITNPVPK	GSVPLSSS[79.9663]PPATHFPDETEITNPVPK	K	K	1386	1411	26	3	8S(79.9663)	sp|P11388|TOP2A_HUMAN	P11388	TOP2A_HUMAN	TOP2A	DNA topoisomerase 2-alpha			1	2.3773668E7	MS/MS	STY:79.9663@GS(0.0089)VPLS(0.0096)S(0.0119)S(0.9338)PPAT(0.0087)HFPDET(0.0131)EIT(0.0139)NPVPK;
GSVPLSSSPPATHFPDETEITNPVPK	GSVPLSS[79.9663]SPPATHFPDETEITNPVPK	K	K	1386	1411	26	3	7S(79.9663)	sp|P11388|TOP2A_HUMAN	P11388	TOP2A_HUMAN	TOP2A	DNA topoisomerase 2-alpha			1	3.17522e+06	MS/MS	STY:79.9663@GS(0.0068)VPLS(0.0068)S(0.4164)S(0.4164)PPAT(0.0172)HFPDET(0.0221)EIT(0.1143)NPVPK;
GSVPLSSSPPATHFPDETEITNPVPK	GSVPLS[79.9663]SSPPATHFPDETEITNPVPK	K	K	1386	1411	26	3	6S(79.9663)	sp|P11388|TOP2A_HUMAN	P11388	TOP2A_HUMAN	TOP2A	DNA topoisomerase 2-alpha			1	2.3773668E7	MS/MS	STY:79.9663@GS(0.0139)VPLS(0.5394)S(0.0083)S(0.0083)PPAT(0.0059)HFPDET(0.2273)EIT(0.1971)NPVPK;
GSFSDTGLGDGK	GS[79.9663]FSDTGLGDGK	K	M	376	387	12	2	2S(79.9663)	sp|Q9Y2W1|TR150_HUMAN	Q9Y2W1	TR150_HUMAN	THRAP3	Thyroid hormone receptor-associated protein 3			1	5.83969e+06	MS/MS	STY:79.9663@GS(0.3333)FS(0.3333)DT(0.3333)GLGDGK;
GSGTASDDEFENLR	GS[79.9663]GTASDDEFENLR	R	I	1902	1915	14	2	2S(79.9663)	sp|Q7Z6Z7|HUWE1_HUMAN	Q7Z6Z7	HUWE1_HUMAN	HUWE1	E3 ubiquitin-protein ligase HUWE1			2	8842248	MS/MS	STY:79.9663@GS(0.4857)GT(0.4857)AS(0.0286)DDEFENLR;
GSPDGSLQTGKPSAPK	GS[79.9663]PDGSLQTGKPSAPK	R	K	480	495	16	2	2S(79.9663)	sp|Q8IZL8|PELP1_HUMAN	Q8IZL8	PELP1_HUMAN	PELP1	Proline-, glutamic acid- and leucine-rich protein 1			1	0	MS/MS	STY:79.9663@GS(0.9261)PDGS(0.0283)LQT(0.0283)GKPS(0.0173)APK;
GSVPLSSSPPATHFPDETEITNPVPK	GS[79.9663]VPLSSSPPATHFPDETEITNPVPK	K	K	1386	1411	26	3	2S(79.9663)	sp|P11388|TOP2A_HUMAN	P11388	TOP2A_HUMAN	TOP2A	DNA topoisomerase 2-alpha			1	2.3773668E7	MS/MS	STY:79.9663@GS(0.7797)VPLS(0.0114)S(0.0114)S(0.0114)PPAT(0.0831)HFPDET(0.0604)EIT(0.0426)NPVPK;
GTSPRPPEGGLGYSQLGDDDLK	GTSPRPPEGGLGYS[79.9663]QLGDDDLK	R	E	750	771	22	3	14S(79.9663)	sp|P21127|CD11B_HUMAN	P21127	CD11B_HUMAN	CDK11B	Cyclin-dependent kinase 11B	CDK11A	sp|Q9UQ88|CD11A_HUMAN	1	3.74614e+06	MS/MS	STY:79.9663@GT(0.3015)S(0.3015)PRPPEGGLGY(0.0109)S(0.3862)QLGDDDLK;
GTSPRPPEGGLGYSQLGDDDLK	GTSPRPPEGGLGY[79.9663]SQLGDDDLK	R	E	750	771	22	3	13Y(79.9663)	sp|P21127|CD11B_HUMAN	P21127	CD11B_HUMAN	CDK11B	Cyclin-dependent kinase 11B	CDK11A	sp|Q9UQ88|CD11A_HUMAN	1	3.74614e+06	MS/MS	STY:79.9663@GT(0.0155)S(0.0155)PRPPEGGLGY(0.4845)S(0.4845)QLGDDDLK;
GTTLQSLGLTGGSATIR	GTTLQSLGLT[79.9663]GGSAT[79.9663]IR	R	F	153	169	17	2	10T(79.9663),15T(79.9663)	sp|Q9BZE9|ASPC1_HUMAN	Q9BZE9	ASPC1_HUMAN	ASPSCR1	Tether containing UBX domain for GLUT4			1	1.2391466E7	MS/MS	STY:79.9663@GT(0.0916)T(0.0916)LQS(0.0918)LGLT(0.8507)GGS(0.0237)AT(0.8507)IR;
GTSPRPPEGGLGYSQLGDDDLK	GT[79.9663]SPRPPEGGLGYSQLGDDDLK	R	E	750	771	22	3	2T(79.9663)	sp|P21127|CD11B_HUMAN	P21127	CD11B_HUMAN	CDK11B	Cyclin-dependent kinase 11B	CDK11A	sp|Q9UQ88|CD11A_HUMAN	1	3.74614e+06	MS/MS	STY:79.9663@GT(0.4882)S(0.4882)PRPPEGGLGY(0.0118)S(0.0118)QLGDDDLK;
GVPAGNSDTEGGQPGR	GVPAGNS[79.9663]DTEGGQPGR	K	K	832	847	16	2	7S(79.9663)	sp|Q9UKV3|ACINU_HUMAN	Q9UKV3	ACINU_HUMAN	ACIN1	Apoptotic chromatin condensation inducer in the nucleus			3	4018031	MS/MS	STY:79.9663@GVPAGNS(0.9481)DT(0.0519)EGGQPGR;
GWLTINNISLMK	GWLT[79.9663]INNISLMK	R	G	524	535	12	3	4T(79.9663)	sp|P50570|DYN2_HUMAN	P50570	DYN2_HUMAN	DNM2	Dynamin-2			4	0	MS/MS	STY:79.9663@GWLT(0.9457)INNIS(0.0543)LMK;
HAPSPEPAVQGTGVAGVPEESGDAAAIPAK	HAPS[79.9663]PEPAVQGTGVAGVPEESGDAAAIPAK	R	K	20	49	30	3	4S(79.9663)	sp|P13051|UNG_HUMAN	P13051	UNG_HUMAN	UNG	Uracil-DNA glycosylase			2	1.3853311E7	MS/MS	STY:79.9663@HAPS(0.8300)PEPAVQGT(0.0808)GVAGVPEES(0.0892)GDAAAIPAK;
HDSPEDVK	HDS[79.9663]PEDVK	R	R	479	486	8	2	3S(79.9663)	sp|P31948|STIP1_HUMAN	P31948	STIP1_HUMAN	STIP1	Stress-induced-phosphoprotein 1			1	2.43703e+06	MS/MS	STY:79.9663@HDS(1.0000)PEDVK;
HEAPSSPISGQPCGDDQNASPSK	HEAPS[79.9663]SPISGQPC[57.0215]GDDQNASPSK	K	L	153	175	23	3	13C(57.0215),5S(79.9663)	sp|O75376|NCOR1_HUMAN	O75376	NCOR1_HUMAN	NCOR1	Nuclear receptor corepressor 1			1	1.80234e+06	MS/MS	STY:79.9663@HEAPS(0.3280)S(0.3280)PIS(0.3280)GQPCGDDQNAS(0.0080)PS(0.0080)K;
HGGSPQPLATTPLSQEPVNPPSEASPTR	HGGSPQPLATTPLSQEPVNPPSEASPT[79.9663]R	R	D	374	401	28	3	27T(79.9663)	sp|Q9UQ35|SRRM2_HUMAN	Q9UQ35	SRRM2_HUMAN	SRRM2	Serine/arginine repetitive matrix protein 2			1	8.19328e+06	MS/MS	STY:79.9663@HGGS(0.0625)PQPLAT(0.0373)T(0.0373)PLS(0.1670)QEPVNPPS(0.0093)EAS(0.0093)PT(0.6772)R;
HGGSPQPLATTPLSQEPVNPPSEASPTR	HGGS[79.9663]PQPLATTPLSQEPVNPPS[79.9663]EASPTR	R	D	374	401	28	3	22S(79.9663),4S(79.9663)	sp|Q9UQ35|SRRM2_HUMAN	Q9UQ35	SRRM2_HUMAN	SRRM2	Serine/arginine repetitive matrix protein 2			2	6739626	MS/MS	STY:79.9663@HGGS(0.9242)PQPLAT(0.0296)T(0.0296)PLS(0.0229)QEPVNPPS(0.9235)EAS(0.0351)PT(0.0351)R;
HIKEEPLSEEEPCTSTAIASPEK	HIKEEPLSEEEPC[57.0215]T[79.9663]STAIASPEK	K	K	495	517	23	3	13C(57.0215),14T(79.9663)	sp|Q9Y2X3|NOP58_HUMAN	Q9Y2X3	NOP58_HUMAN	NOP58	Nucleolar protein 58			1	0	MS/MS	STY:79.9663@HIKEEPLS(0.0621)EEEPCT(0.3033)S(0.3033)T(0.3033)AIAS(0.0281)PEK;
HIVSNDSSDSDDESHEPK	HIVSNDSSDS[79.9663]DDESHEPK	K	G	428	445	18	3	10S(79.9663)	sp|P47712|PA24A_HUMAN	P47712	PA24A_HUMAN	PLA2G4A	Cytosolic phospholipase A2			5	1.597259E7	MS/MS	STY:79.9663@HIVS(0.0169)NDS(0.0169)S(0.0169)DS(0.9352)DDES(0.0140)HEPK;
HIVSNDSSDSDDESHEPK	HIVSNDSS[79.9663]DSDDESHEPK	K	G	428	445	18	3	8S(79.9663)	sp|P47712|PA24A_HUMAN	P47712	PA24A_HUMAN	PLA2G4A	Cytosolic phospholipase A2			1	3.52673e+06	MS/MS	STY:79.9663@HIVS(0.0114)NDS(0.0268)S(0.4720)DS(0.4720)DDES(0.0177)HEPK;
HIVSNDSSDSDDESHEPK	HIVSNDS[79.9663]SDSDDESHEPK	K	G	428	445	18	3	7S(79.9663)	sp|P47712|PA24A_HUMAN	P47712	PA24A_HUMAN	PLA2G4A	Cytosolic phospholipase A2			2	1.597259E7	MS/MS	STY:79.9663@HIVS(0.0139)NDS(0.7048)S(0.0139)DS(0.2469)DDES(0.0204)HEPK;
HIVSNDSSDSDDESHEPK	HIVS[79.9663]NDSSDSDDESHEPK	K	G	428	445	18	3	4S(79.9663)	sp|P47712|PA24A_HUMAN	P47712	PA24A_HUMAN	PLA2G4A	Cytosolic phospholipase A2			2	1.597259E7	MS/MS	STY:79.9663@HIVS(0.9433)NDS(0.0143)S(0.0142)DS(0.0142)DDES(0.0142)HEPK;
HRPSPPATPPPK	HRPS[79.9663]PPAT[79.9663]PPPK	R	T	399	410	12	2	4S(79.9663),8T(79.9663)	sp|Q8IYB3|SRRM1_HUMAN	Q8IYB3	SRRM1_HUMAN	SRRM1	Serine/arginine repetitive matrix protein 1			1	413702	MS/MS	STY:79.9663@HRPS(1.0000)PPAT(1.0000)PPPK;
HSCSGSSPPR	HSC[57.0215]SGSS[79.9663]PPR	R	V	889	898	10	2	3C(57.0215),7S(79.9663)	sp|Q9UQ35|SRRM2_HUMAN	Q9UQ35	SRRM2_HUMAN	SRRM2	Serine/arginine repetitive matrix protein 2			1	4413718	MS/MS	STY:79.9663@HS(0.4606)CS(0.0125)GS(0.0125)S(0.5145)PPR;
HSTENDSPTNVQQ	HSTENDSPT[79.9663]NVQQ	K	-	367	379	13	2	9T(79.9663)	sp|P49354|FNTA_HUMAN	P49354	FNTA_HUMAN	FNTA	Protein farnesyltransferase/geranylgeranyltransferase type-1 subunit alpha			1	0	MS/MS	STY:79.9663@HS(0.0304)T(0.0304)ENDS(0.0304)PT(0.9089)NVQQ;
HSLDSDEEEDDDDGGSSK	HS[79.9663]LDSDEEEDDDDGGSSK	K	Y	45	62	18	2	2S(79.9663)	sp|O95400|CD2B2_HUMAN	O95400	CD2B2_HUMAN	CD2BP2	CD2 antigen cytoplasmic tail-binding protein 2			1	745319	MS/MS	STY:79.9663@HS(0.4768)LDS(0.4768)DEEEDDDDGGS(0.0232)S(0.0232)K;
HTGPNSPDTANDGFVR	HTGPNS[79.9663]PDTANDGFVR	K	L	99	114	16	2	6S(79.9663)	sp|P31943|HNRH1_HUMAN	P31943	HNRH1_HUMAN	HNRNPH1	Heterogeneous nuclear ribonucleoprotein H	HNRNPH2	sp|P55795|HNRH2_HUMAN	4	1.2253442E7	MS/MS	STY:79.9663@HT(0.0262)GPNS(0.9401)PDT(0.0337)ANDGFVR;
HTLGDSDNES	HTLGDSDNES[79.9663]	K	-	174	183	10	2	10S(79.9663)	sp|P02794|FRIH_HUMAN	P02794	FRIH_HUMAN	FTH1	Ferritin heavy chain			3	3.0393238E7	MS/MS	STY:79.9663@HT(0.0259)LGDS(0.0269)DNES(0.9472);
HTLGDSDNES	HTLGDS[79.9663]DNES	K	-	174	183	10	2	6S(79.9663)	sp|P02794|FRIH_HUMAN	P02794	FRIH_HUMAN	FTH1	Ferritin heavy chain			1	1.9721442E7	MS/MS	STY:79.9663@HT(0.0161)LGDS(0.4919)DNES(0.4919);
HTGPNSPDTANDGFVR	HT[79.9663]GPNSPDTANDGFVR	K	L	99	114	16	2	2T(79.9663)	sp|P31943|HNRH1_HUMAN	P31943	HNRH1_HUMAN	HNRNPH1	Heterogeneous nuclear ribonucleoprotein H	HNRNPH2	sp|P55795|HNRH2_HUMAN	3	1.2253442E7	MS/MS	STY:79.9663@HT(0.9392)GPNS(0.0278)PDT(0.0329)ANDGFVR;
HTLGDSDNES	HT[79.9663]LGDSDNES	K	-	174	183	10	2	2T(79.9663)	sp|P02794|FRIH_HUMAN	P02794	FRIH_HUMAN	FTH1	Ferritin heavy chain			3	3.0393238E7	MS/MS	STY:79.9663@HT(0.4866)LGDS(0.4866)DNES(0.0268);
IALESEGRPEEQMESDNCSGGDDDWTHLSSK	IALESEGRPEEQMESDNC[57.0215]S[79.9663]GGDDDWTHLSSK	K	E	314	344	31	3	18C(57.0215),19S(79.9663)	sp|Q13501|SQSTM_HUMAN	Q13501	SQSTM_HUMAN	SQSTM1	Sequestosome-1			1	3365775	MS/MS	STY:79.9663@IALES(0.0130)EGRPEEQMES(0.0130)DNCS(0.2435)GGDDDWT(0.2435)HLS(0.2435)S(0.2435)K;
IALESEGRPEEQMESDNCSGGDDDWTHLSSK	IALESEGRPEEQMES[79.9663]DNC[57.0215]SGGDDDWTHLSSK	K	E	314	344	31	3	15S(79.9663),18C(57.0215)	sp|Q13501|SQSTM_HUMAN	Q13501	SQSTM_HUMAN	SQSTM1	Sequestosome-1			1	3872749	MS/MS	STY:79.9663@IALES(0.0117)EGRPEEQMES(0.8232)DNCS(0.0204)GGDDDWT(0.0482)HLS(0.0482)S(0.0482)K;
IASDEEIQGTK	IAS[79.9663]DEEIQGTK	R	D	891	901	11	2	3S(79.9663)	sp|Q8WX93|PALLD_HUMAN	Q8WX93	PALLD_HUMAN	PALLD	Palladin			1	0	MS/MS	STY:79.9663@IAS(0.5535)DEEIQGT(0.4465)K;
IDDRDSDEEGASDR	IDDRDS[79.9663]DEEGASDR	K	R	777	790	14	2	6S(79.9663)	sp|Q8TDD1|DDX54_HUMAN	Q8TDD1	DDX54_HUMAN	DDX54	ATP-dependent RNA helicase DDX54			1	0	MS/MS	STY:79.9663@IDDRDS(0.9290)DEEGAS(0.0710)DR;
IDEDGENTQIEDTEPMSPVLNSK	IDEDGENTQIEDTEPMSPVLNS[79.9663]K	R	F	536	558	23	3	22S(79.9663)	sp|Q12888|TP53B_HUMAN	Q12888	TP53B_HUMAN	TP53BP1	TP53-binding protein 1			1	1.1523513E7	MS/MS	STY:79.9663@IDEDGENT(0.0344)QIEDT(0.0735)EPMS(0.0169)PVLNS(0.8753)K;
IDEPSTPYHSMMGDDEDACSDTEATEAMAPDILAR	IDEPSTPYHS[79.9663]MMGDDEDAC[57.0215]SDTEATEAMAPDILAR	K	K	68	102	35	3	10S(79.9663),19C(57.0215)	sp|P41236|IPP2_HUMAN	P41236	IPP2_HUMAN	PPP1R2	Protein phosphatase inhibitor 2			1	0	MS/MS	STY:79.9663@IDEPS(0.0075)T(0.0075)PY(0.0075)HS(0.4513)MMGDDEDACS(0.0793)DT(0.1048)EAT(0.3421)EAMAPDILAR;
IDGATQSSPAEPK	IDGAT[79.9663]QSSPAEPK	K	S	707	719	13	2	5T(79.9663)	sp|Q32MZ4|LRRF1_HUMAN	Q32MZ4	LRRF1_HUMAN	LRRFIP1	Leucine-rich repeat flightless-interacting protein 1			2	3210375	MS/MS	STY:79.9663@IDGAT(0.3333)QS(0.3333)S(0.3333)PAEPK;
IDISPSTFR	IDISPST[79.9663]FR	R	K	679	687	9	2	7T(79.9663)	sp|Q9Y2W1|TR150_HUMAN	Q9Y2W1	TR150_HUMAN	THRAP3	Thyroid hormone receptor-associated protein 3			1	2.8478458E7	MS/MS	STY:79.9663@IDIS(0.0421)PS(0.0421)T(0.9159)FR;
IDISPSTLR	IDISPST[79.9663]LR	R	K	655	663	9	2	7T(79.9663)	sp|Q9NYF8|BCLF1_HUMAN	Q9NYF8	BCLF1_HUMAN	BCLAF1	Bcl-2-associated transcription factor 1			1	2.4721458E7	MS/MS	STY:79.9663@IDIS(0.0296)PS(0.0463)T(0.9241)LR;
IDISPSTFR	IDISPS[79.9663]TFR	R	K	679	687	9	2	6S(79.9663)	sp|Q9Y2W1|TR150_HUMAN	Q9Y2W1	TR150_HUMAN	THRAP3	Thyroid hormone receptor-associated protein 3			2	1.887976E7	MS/MS	STY:79.9663@IDIS(0.0257)PS(0.9270)T(0.0473)FR;
IDISPSTLR	IDISPS[79.9663]TLR	R	K	655	663	9	2	6S(79.9663)	sp|Q9NYF8|BCLF1_HUMAN	Q9NYF8	BCLF1_HUMAN	BCLAF1	Bcl-2-associated transcription factor 1			2	2.3663764E7	MS/MS	STY:79.9663@IDIS(0.0275)PS(0.9465)T(0.0260)LR;
IDISPSTFR	IDIS[79.9663]PSTFR	R	K	679	687	9	2	4S(79.9663)	sp|Q9Y2W1|TR150_HUMAN	Q9Y2W1	TR150_HUMAN	THRAP3	Thyroid hormone receptor-associated protein 3			10	4.7358216E7	MS/MS	STY:79.9663@IDIS(0.9483)PS(0.0259)T(0.0259)FR;
IDISPSTLR	IDIS[79.9663]PSTLR	R	K	655	663	9	2	4S(79.9663)	sp|Q9NYF8|BCLF1_HUMAN	Q9NYF8	BCLF1_HUMAN	BCLAF1	Bcl-2-associated transcription factor 1			3	4.0336992E7	MS/MS	STY:79.9663@IDIS(0.9468)PS(0.0266)T(0.0266)LR;
IEDVGSDEEDDSGK	IEDVGSDEEDDS[79.9663]GK	K	D	250	263	14	2	12S(79.9663)	sp|P08238|HS90B_HUMAN	P08238	HS90B_HUMAN	HSP90AB1	Heat shock protein HSP 90-beta	HSP90AB2P	sp|Q58FF8|H90B2_HUMAN	7	6.1732685E8	MS/MS	STY:79.9663@IEDVGS(0.0575)DEEDDS(0.9425)GK;
IEDVGSDEEDDSGK	IEDVGS[79.9663]DEEDDSGK	K	D	250	263	14	2	6S(79.9663)	sp|P08238|HS90B_HUMAN	P08238	HS90B_HUMAN	HSP90AB1	Heat shock protein HSP 90-beta	HSP90AB2P	sp|Q58FF8|H90B2_HUMAN	13	6.1732685E8	MS/MS	STY:79.9663@IEDVGS(0.9495)DEEDDS(0.0505)GK;
IESDEEEDFENVGK	IES[79.9663]DEEEDFENVGK	R	V	1343	1356	14	2	3S(79.9663)	sp|Q96T23|RSF1_HUMAN	Q96T23	RSF1_HUMAN	RSF1	Remodeling and spacing factor 1			2	0	MS/MS	STY:79.9663@IES(1.0000)DEEEDFENVGK;
IGELGAPEVWGLSPK	IGELGAPEVWGLS[79.9663]PK	R	N	137	151	15	2	13S(79.9663)	sp|Q8N5F7|NKAP_HUMAN	Q8N5F7	NKAP_HUMAN	NKAP	NF-kappa-B-activating protein			1	0	MS/MS	STY:79.9663@IGELGAPEVWGLS(1.0000)PK;
IILDLISESPIK	IILDLIS[79.9663]ESPIK	K	G	208	219	12	2	7S(79.9663)	sp|P61978|HNRPK_HUMAN	P61978	HNRPK_HUMAN	HNRNPK	Heterogeneous nuclear ribonucleoprotein K			1	0	MS/MS	STY:79.9663@IILDLIS(0.5000)ES(0.5000)PIK;
IKEEVLSESEAENQQAGAAALAPEIVIK	IKEEVLS[79.9663]ESEAENQQAGAAALAPEIVIK	K	V	771	798	28	3	7S(79.9663)	sp|Q9UJX5|APC4_HUMAN	Q9UJX5	APC4_HUMAN	ANAPC4	Anaphase-promoting complex subunit 4			1	0	MS/MS	STY:79.9663@IKEEVLS(0.5000)ES(0.5000)EAENQQAGAAALAPEIVIK;
ILLVDSPGMGNADDEQQEEGTSSK	ILLVDS[79.9663]PGMGNADDEQQEEGTSSK	K	Q	606	629	24	3	6S(79.9663)	sp|Q9UKN8|TF3C4_HUMAN	Q9UKN8	TF3C4_HUMAN	GTF3C4	General transcription factor 3C polypeptide 4			1	4501048	MS/MS	STY:79.9663@ILLVDS(0.9424)PGMGNADDEQQEEGT(0.0175)S(0.0201)S(0.0201)K;
INICGSVDIVQCGPSSAVCMHDLK	INIC[57.0215]GS[79.9663]VDIVQC[57.0215]GPSSAVC[57.0215]MHDLK	K	T	66	89	24	3	12C(57.0215),19C(57.0215),4C(57.0215),6S(79.9663)	sp|P11717|MPRI_HUMAN	P11717	MPRI_HUMAN	IGF2R	Cation-independent mannose-6-phosphate receptor			1	0	MS/MS	STY:79.9663@INICGS(0.7774)VDIVQCGPS(0.1113)S(0.1113)AVCMHDLK;
IPMTPTSSFVSPPPPTASPHSNR	IPMTPTSSFVSPPPPTASPHS[79.9663]NR	K	T	389	411	23	3	21S(79.9663)	sp|Q7Z5L9|I2BP2_HUMAN	Q7Z5L9	I2BP2_HUMAN	IRF2BP2	Interferon regulatory factor 2-binding protein 2			2	3.04959e+06	MS/MS	STY:79.9663@IPMT(0.0075)PT(0.0076)S(0.0076)S(0.0076)FVS(0.0076)PPPPT(0.0159)AS(0.0159)PHS(0.9304)NR;
IPMTPTSSFVSPPPPTASPHSNR	IPMT[79.9663]PTSSFVSPPPPTASPHSNR	K	T	389	411	23	3	4T(79.9663)	sp|Q7Z5L9|I2BP2_HUMAN	Q7Z5L9	I2BP2_HUMAN	IRF2BP2	Interferon regulatory factor 2-binding protein 2			1	3.04959e+06	MS/MS	STY:79.9663@IPMT(0.1982)PT(0.1982)S(0.1982)S(0.1982)FVS(0.1982)PPPPT(0.0031)AS(0.0031)PHS(0.0030)NR;
IQLLISTDATAR	IQLLIS[79.9663]T[79.9663]DATAR	K	G	556	567	12	2	6S(79.9663),7T(79.9663)	sp|Q8N8A6|DDX51_HUMAN	Q8N8A6	DDX51_HUMAN	DDX51	ATP-dependent RNA helicase DDX51			1	0	MS/MS	STY:79.9663@IQLLIS(0.6870)T(0.6565)DAT(0.6565)AR;
IQNSDDEER	IQNS[79.9663]DDEER	K	A	159	167	9	2	4S(79.9663)	sp|Q8WVC0|LEO1_HUMAN	Q8WVC0	LEO1_HUMAN	LEO1	RNA polymerase-associated protein LEO1			3	2.13361e+06	MS/MS	STY:79.9663@IQNS(1.0000)DDEER;
IQPQPPDEDGDHSDKEDEQPQVVVLK	IQPQPPDEDGDHS[79.9663]DKEDEQPQVVVLK	R	K	38	63	26	3,4	13S(79.9663)	sp|Q96AT1|K1143_HUMAN	Q96AT1	K1143_HUMAN	KIAA1143	Uncharacterized protein KIAA1143			5	1.9386332E7	MS/MS	STY:79.9663@IQPQPPDEDGDHS(1.0000)DKEDEQPQVVVLK;
IQQFDDGGSDEEDIWEEK	IQQFDDGGS[79.9663]DEEDIWEEK	R	H	609	626	18	2	9S(79.9663)	sp|Q5H9R7|PP6R3_HUMAN	Q5H9R7	PP6R3_HUMAN	PPP6R3	Serine/threonine-protein phosphatase 6 regulatory subunit 3			1	0	MS/MS	STY:79.9663@IQQFDDGGS(1.0000)DEEDIWEEK;
IRTSPTFR	IRT[79.9663]SPTFR	K	R	40	47	8	2	3T(79.9663)	sp|P62750|RL23A_HUMAN	P62750	RL23A_HUMAN	RPL23A	Large ribosomal subunit protein uL23			1	8422248	MS/MS	STY:79.9663@IRT(0.3333)S(0.3333)PT(0.3333)FR;
ISPLSSPCSSPLQGTPASSLVSK	IS[79.9663]PLSSPC[57.0215]SSPLQGTPASSLVSK	K	I	519	541	23	3	2S(79.9663),8C(57.0215)	sp|Q14432|PDE3A_HUMAN	Q14432	PDE3A_HUMAN	PDE3A	cGMP-inhibited 3',5'-cyclic phosphodiesterase 3A			1	0	MS/MS	STY:79.9663@IS(0.5128)PLS(0.0053)S(0.0053)PCS(0.2123)S(0.2123)PLQGT(0.0089)PAS(0.0134)S(0.0148)LVS(0.0148)K;
ITPPAAKPGSPQAK	ITPPAAKPGS[79.9663]PQAK	R	S	669	682	14	2	10S(79.9663)	sp|P35658|NU214_HUMAN	P35658	NU214_HUMAN	NUP214	Nuclear pore complex protein Nup214			1	763043	MS/MS	STY:79.9663@IT(0.0731)PPAAKPGS(0.9269)PQAK;
ITSISPTPEPPAALEDNPDAWGDGSPR	ITSISPT[79.9663]PEPPAALEDNPDAWGDGSPR	R	D	118	144	27	3	7T(79.9663)	sp|Q14934|NFAC4_HUMAN	Q14934	NFAC4_HUMAN	NFATC4	Nuclear factor of activated T-cells, cytoplasmic 4			1	8097802	MS/MS	STY:79.9663@IT(0.2729)S(0.2729)IS(0.0068)PT(0.3937)PEPPAALEDNPDAWGDGS(0.0537)PR;
IYHLPDAESDEDEDFK	IYHLPDAES[79.9663]DEDEDFK	K	E	210	225	16	2	9S(79.9663)	sp|Q15019|SEPT2_HUMAN	Q15019	SEPT2_HUMAN	SEPTIN2	Septin-2			5	1.7868586E7	MS/MS	STY:79.9663@IY(0.0533)HLPDAES(0.9467)DEDEDFK;
IYHLPDAESDEDEDFK	IY[79.9663]HLPDAESDEDEDFK	K	E	210	225	16	3	2Y(79.9663)	sp|Q15019|SEPT2_HUMAN	Q15019	SEPT2_HUMAN	SEPTIN2	Septin-2			1	3.85833e+06	MS/MS	STY:79.9663@IY(0.5000)HLPDAES(0.5000)DEDEDFK;
KAEGAATEEEGTPK	KAEGAATEEEGT[79.9663]PK	K	E	25	38	14	2,3	12T(79.9663)	sp|P80723|BASP1_HUMAN	P80723	BASP1_HUMAN	BASP1	Brain acid soluble protein 1			4	8.25084e+06	MS/MS	STY:79.9663@KAEGAAT(0.0543)EEEGT(0.9457)PK;
KAEGAATEEEGTPK	KAEGAAT[79.9663]EEEGTPK	K	E	25	38	14	2	7T(79.9663)	sp|P80723|BASP1_HUMAN	P80723	BASP1_HUMAN	BASP1	Brain acid soluble protein 1			5	6425235	MS/MS	STY:79.9663@KAEGAAT(0.9218)EEEGT(0.0782)PK;
KAEGEPQEESPLK	KAEGEPQEES[79.9663]PLK	K	S	168	180	13	2,3	10S(79.9663)	sp|Q9NYF8|BCLF1_HUMAN	Q9NYF8	BCLF1_HUMAN	BCLAF1	Bcl-2-associated transcription factor 1			19	3.305658E7	MS/MS	STY:79.9663@KAEGEPQEES(1.0000)PLK;
KASPEPPDSAEGALK	KASPEPPDS[79.9663]AEGALK	R	L	545	559	15	2	9S(79.9663)	sp|Q9H1B7|I2BPL_HUMAN	Q9H1B7	I2BPL_HUMAN	IRF2BPL	Probable E3 ubiquitin-protein ligase IRF2BPL			1	3996440	MS/MS	STY:79.9663@KAS(0.0749)PEPPDS(0.9251)AEGALK;
KASPEAASTPR	KAS[79.9663]PEAASTPR	K	D	401	411	11	2	3S(79.9663)	sp|P29590|PML_HUMAN	P29590	PML_HUMAN	PML	Protein PML			1	0	MS/MS	STY:79.9663@KAS(0.9330)PEAAS(0.0335)T(0.0335)PR;
KASPEPPDSAEGALK	KAS[79.9663]PEPPDSAEGALK	R	L	545	559	15	2	3S(79.9663)	sp|Q9H1B7|I2BPL_HUMAN	Q9H1B7	I2BPL_HUMAN	IRF2BPL	Probable E3 ubiquitin-protein ligase IRF2BPL			4	8577797	MS/MS	STY:79.9663@KAS(0.9457)PEPPDS(0.0543)AEGALK;
KDDDSDDESQSSHTGK	KDDDSDDES[79.9663]QSSHTGK	R	K	454	469	16	3	9S(79.9663)	sp|O94874|UFL1_HUMAN	O94874	UFL1_HUMAN	UFL1	E3 UFM1-protein ligase 1			1	0	MS/MS	STY:79.9663@KDDDS(0.0179)DDES(0.9357)QS(0.0155)S(0.0155)HT(0.0155)GK;
KDDSDDDGGGWITPSNIK	KDDSDDDGGGWIT[79.9663]PSNIK	R	Q	198	215	18	2	13T(79.9663)	sp|Q9ULX3|NOB1_HUMAN	Q9ULX3	NOB1_HUMAN	NOB1	RNA-binding protein NOB1			1	5608691	MS/MS	STY:79.9663@KDDS(0.2460)DDDGGGWIT(0.3770)PS(0.3770)NIK;
KDDSDDDGGGWITPSNIK	KDDS[79.9663]DDDGGGWITPSNIK	R	Q	198	215	18	2	4S(79.9663)	sp|Q9ULX3|NOB1_HUMAN	Q9ULX3	NOB1_HUMAN	NOB1	RNA-binding protein NOB1			1	5608691	MS/MS	STY:79.9663@KDDS(0.8142)DDDGGGWIT(0.0335)PS(0.1523)NIK;
KDDSHSAEDSEDEK	KDDS[79.9663]HS[79.9663]AEDSEDEK	K	E	70	83	14	2	4S(79.9663),6S(79.9663)	sp|Q9H1E3|NUCKS_HUMAN	Q9H1E3	NUCKS_HUMAN	NUCKS1	Nuclear ubiquitous casein and cyclin-dependent kinase substrate 1			1	0	MS/MS	STY:79.9663@KDDS(0.6667)HS(0.6667)AEDS(0.6667)EDEK;
KDSASEEEAR	KDS[79.9663]ASEEEAR	R	V	256	265	10	2	3S(79.9663)	sp|Q9NX58|LYAR_HUMAN	Q9NX58	LYAR_HUMAN	LYAR	Cell growth-regulating nucleolar protein			1	1.57228e+06	MS/MS	STY:79.9663@KDS(0.5000)AS(0.5000)EEEAR;
KEDSDEEEDDDSEEDEEDDEDEDEDEDEIEPAAMK	KEDS[79.9663]DEEEDDDS[79.9663]EEDEEDDEDEDEDEDEIEPAAMK	K	A	142	176	35	3	12S(79.9663),4S(79.9663)	sp|P19338|NUCL_HUMAN	P19338	NUCL_HUMAN	NCL	Nucleolin			3	2.0376022E7	MS/MS	STY:79.9663@KEDS(1.0000)DEEEDDDS(1.0000)EEDEEDDEDEDEDEDEIEPAAMK;
KEEPSQNDISPK	KEEPS[79.9663]QNDISPK	K	T	80	91	12	2	5S(79.9663)	sp|Q9NR30|DDX21_HUMAN	Q9NR30	DDX21_HUMAN	DDX21	Nucleolar RNA helicase 2			1	898407	MS/MS	STY:79.9663@KEEPS(0.5000)QNDIS(0.5000)PK;
KEESEESDDDMGFGLFD	KEES[79.9663]EESDDDMGFGLFD	K	-	99	115	17	2	4S(79.9663)	sp|P05387|RLA2_HUMAN	P05387	RLA2_HUMAN	RPLP2	Large ribosomal subunit protein P2	RPLP1	sp|P05386|RLA1_HUMAN	2	1.9443486E7	MS/MS	STY:79.9663@KEES(0.5000)EES(0.5000)DDDMGFGLFD;
KEESEESDDDMGFGLFD	KEES[79.9663]EES[79.9663]DDDMGFGLFD	K	-	99	115	17	2,3	4S(79.9663),7S(79.9663)	sp|P05387|RLA2_HUMAN	P05387	RLA2_HUMAN	RPLP2	Large ribosomal subunit protein P2	RPLP1	sp|P05386|RLA1_HUMAN	5	1.48337264E8	MS/MS	STY:79.9663@KEES(1.0000)EES(1.0000)DDDMGFGLFD;
KEESEESDDDMGFGLFD	KEES[79.9663]EES[79.9663]DDDM[15.9949]GFGLFD	K	-	99	115	17	2	11M(15.9949),4S(79.9663),7S(79.9663)	sp|P05387|RLA2_HUMAN	P05387	RLA2_HUMAN	RPLP2	Large ribosomal subunit protein P2	RPLP1	sp|P05386|RLA1_HUMAN	1	7.9437e+06	MS/MS	STY:79.9663@KEES(1.0000)EES(1.0000)DDDMGFGLFD;M:15.9949@KEESEESDDDM(1.0000)GFGLFD;
KEETPGTPK	KEETPGT[79.9663]PK	K	K	152	160	9	2	7T(79.9663)	sp|Q99442|SEC62_HUMAN	Q99442	SEC62_HUMAN	SEC62	Translocation protein SEC62			1	7566879	MS/MS	STY:79.9663@KEET(0.2670)PGT(0.7330)PK;
KEETPGTPK	KEET[79.9663]PGTPK	K	K	152	160	9	2	4T(79.9663)	sp|Q99442|SEC62_HUMAN	Q99442	SEC62_HUMAN	SEC62	Translocation protein SEC62			1	7566879	MS/MS	STY:79.9663@KEET(0.5000)PGT(0.5000)PK;
KEPAITSQNSPEAR	KEPAITS[79.9663]QNSPEAR	K	E	91	104	14	2	7S(79.9663)	sp|P23193|TCEA1_HUMAN	P23193	TCEA1_HUMAN	TCEA1	Transcription elongation factor A protein 1			1	1.54798e+06	MS/MS	STY:79.9663@KEPAIT(0.0201)S(0.4900)QNS(0.4900)PEAR;
KEPAITSQNSPEAR	KEPAIT[79.9663]SQNSPEAR	K	E	91	104	14	2	6T(79.9663)	sp|P23193|TCEA1_HUMAN	P23193	TCEA1_HUMAN	TCEA1	Transcription elongation factor A protein 1			1	809392	MS/MS	STY:79.9663@KEPAIT(0.3333)S(0.3333)QNS(0.3333)PEAR;
KETESEAEDNLDDLEK	KETES[79.9663]EAEDNLDDLEK	K	H	870	885	16	2,3	5S(79.9663)	sp|Q8IYB3|SRRM1_HUMAN	Q8IYB3	SRRM1_HUMAN	SRRM1	Serine/arginine repetitive matrix protein 1			3	1.3507709E7	MS/MS	STY:79.9663@KET(0.0521)ES(0.9479)EAEDNLDDLEK;
KETESEAEDNLDDLEK	KET[79.9663]ESEAEDNLDDLEK	K	H	870	885	16	2,3	3T(79.9663)	sp|Q8IYB3|SRRM1_HUMAN	Q8IYB3	SRRM1_HUMAN	SRRM1	Serine/arginine repetitive matrix protein 1			4	1.3507709E7	MS/MS	STY:79.9663@KET(0.5000)ES(0.5000)EAEDNLDDLEK;
KETPPPLVPPAAR	KET[79.9663]PPPLVPPAAR	R	E	3	15	13	2	3T(79.9663)	sp|Q9BQA1|MEP50_HUMAN	Q9BQA1	MEP50_HUMAN	WDR77	Methylosome protein WDR77			1	3.23141e+06	MS/MS	STY:79.9663@KET(1.0000)PPPLVPPAAR;
KETQSPEQVK	KET[79.9663]QSPEQVK	K	S	492	501	10	2	3T(79.9663)	sp|Q9NYF8|BCLF1_HUMAN	Q9NYF8	BCLF1_HUMAN	BCLAF1	Bcl-2-associated transcription factor 1			2	8.26622e+06	MS/MS	STY:79.9663@KET(0.9456)QS(0.0544)PEQVK;
KGAGDGSDEEVDGK	KGAGDGS[79.9663]DEEVDGK	R	A	1937	1950	14	2,3	7S(79.9663)	sp|P35579|MYH9_HUMAN	P35579	MYH9_HUMAN	MYH9	Myosin-9			13	5.5247512E7	MS/MS	STY:79.9663@KGAGDGS(1.0000)DEEVDGK;
KGDVEGSQSQDEGEGSGESER	KGDVEGS[79.9663]QSQDEGEGSGESER	K	G	1059	1079	21	3	7S(79.9663)	sp|Q9UQE7|SMC3_HUMAN	Q9UQE7	SMC3_HUMAN	SMC3	Structural maintenance of chromosomes protein 3			1	1.14772e+06	MS/MS	STY:79.9663@KGDVEGS(0.4846)QS(0.4846)QDEGEGS(0.0176)GES(0.0133)ER;
KGGEFDEFVNDDTDDDLPISK	KGGEFDEFVNDDTDDDLPIS[79.9663]K	K	K	913	933	21	3	20S(79.9663)	sp|Q6PD62|CTR9_HUMAN	Q6PD62	CTR9_HUMAN	CTR9	RNA polymerase-associated protein CTR9 homolog			1	0	MS/MS	STY:79.9663@KGGEFDEFVNDDT(0.0960)DDDLPIS(0.9040)K;
KGGEFDEFVNDDTDDDLPISK	KGGEFDEFVNDDT[79.9663]DDDLPISK	K	K	913	933	21	3	13T(79.9663)	sp|Q6PD62|CTR9_HUMAN	Q6PD62	CTR9_HUMAN	CTR9	RNA polymerase-associated protein CTR9 homolog			1	0	MS/MS	STY:79.9663@KGGEFDEFVNDDT(0.9476)DDDLPIS(0.0524)K;
KIQSQFTDAQK	KIQSQFT[79.9663]DAQK	R	H	607	617	11	2	7T(79.9663)	sp|P15924|DESP_HUMAN	P15924	DESP_HUMAN	DSP	Desmoplakin			1	2.6602546E7	MS/MS	STY:79.9663@KIQS(0.4494)QFT(0.5506)DAQK;
KKPDSPPK	KKPDS[79.9663]PPK	K	V	744	751	8	2	5S(79.9663)	sp|Q96T23|RSF1_HUMAN	Q96T23	RSF1_HUMAN	RSF1	Remodeling and spacing factor 1			1	331186	MS/MS	STY:79.9663@KKPDS(1.0000)PPK;
KLSGDQPAAR	KLS[79.9663]GDQPAAR	R	T	1348	1357	10	2	3S(79.9663)	sp|Q13428|TCOF_HUMAN	Q13428	TCOF_HUMAN	TCOF1	Treacle protein			6	1.7719336E7	MS/MS	STY:79.9663@KLS(1.0000)GDQPAAR;
KLTSDEEGEPSGK	KLT[79.9663]SDEEGEPSGK	K	R	627	639	13	2	3T(79.9663)	sp|Q8WVC0|LEO1_HUMAN	Q8WVC0	LEO1_HUMAN	LEO1	RNA polymerase-associated protein LEO1			3	4861940	MS/MS	STY:79.9663@KLT(0.4920)S(0.4920)DEEGEPS(0.0160)GK;
KNNVFMTSALVQSSVDIK	KNNVFM[15.9949]TSALVQS[79.9663]SVDIK	R	S	92	109	18	3	13S(79.9663),6M(15.9949)	sp|Q86VV4|RNB3L_HUMAN	Q86VV4	RNB3L_HUMAN	RANBP3L	Ran-binding protein 3-like			1	0	MS/MS	STY:79.9663@KNNVFMT(0.0189)S(0.0193)ALVQS(0.4809)S(0.4809)VDIK;M:15.9949@KNNVFM(1.0000)TSALVQSSVDIK;
KPAGATPKK	KPAGAT[79.9663]PKK	K	A	133	141	9	2	6T(79.9663)	sp|P16401|H15_HUMAN	P16401	H15_HUMAN	H1-5	Histone H1.5			1	0	MS/MS	STY:79.9663@KPAGAT(1.0000)PKK;
KPATPAEDDEDDDIDLFGSDNEEEDK	KPATPAEDDEDDDIDLFGS[79.9663]DNEEEDK	K	E	144	169	26	3	19S(79.9663)	sp|P29692|EF1D_HUMAN	P29692	EF1D_HUMAN	EEF1D	Elongation factor 1-delta			5	4.6883644E7	MS/MS	STY:79.9663@KPAT(0.0509)PAEDDEDDDIDLFGS(0.9491)DNEEEDK;
KPATPAEDDEDDDIDLFGSDNEEEDK	KPAT[79.9663]PAEDDEDDDIDLFGSDNEEEDK	K	E	144	169	26	3	4T(79.9663)	sp|P29692|EF1D_HUMAN	P29692	EF1D_HUMAN	EEF1D	Elongation factor 1-delta			1	0	MS/MS	STY:79.9663@KPAT(0.6019)PAEDDEDDDIDLFGS(0.3981)DNEEEDK;
KPGDGEVSPSTEDAPFQHSPLGK	KPGDGEVS[79.9663]PSTEDAPFQHSPLGK	K	A	520	542	23	3	8S(79.9663)	sp|O60318|GANP_HUMAN	O60318	GANP_HUMAN	MCM3AP	Germinal-center associated nuclear protein			2	3.16518e+06	MS/MS	STY:79.9663@KPGDGEVS(0.9395)PS(0.0179)T(0.0179)EDAPFQHS(0.0248)PLGK;
KPIETGSPK	KPIET[79.9663]GSPK	K	T	443	451	9	2	5T(79.9663)	sp|Q05519|SRS11_HUMAN	Q05519	SRS11_HUMAN	SRSF11	Serine/arginine-rich splicing factor 11			2	3.2497182E7	MS/MS	STY:79.9663@KPIET(0.5000)GS(0.5000)PK;
KPPAPPSPVQSQSPSTNWSPAVPVK	KPPAPPS[79.9663]PVQSQS[79.9663]PSTNWSPAVPVK	K	K	763	787	25	3	13S(79.9663),7S(79.9663)	sp|Q8IYB3|SRRM1_HUMAN	Q8IYB3	SRRM1_HUMAN	SRRM1	Serine/arginine repetitive matrix protein 1			1	3.41605e+06	MS/MS	STY:79.9663@KPPAPPS(0.6079)PVQS(0.6079)QS(0.7198)PS(0.0228)T(0.0213)NWS(0.0203)PAVPVK;
KPPAPPSPVQSQSPSTNWSPAVPVK	KPPAPPS[79.9663]PVQS[79.9663]QSPSTNWSPAVPVK	K	K	763	787	25	3	11S(79.9663),7S(79.9663)	sp|Q8IYB3|SRRM1_HUMAN	Q8IYB3	SRRM1_HUMAN	SRRM1	Serine/arginine repetitive matrix protein 1			2	6271788	MS/MS	STY:79.9663@KPPAPPS(0.7034)PVQS(0.6216)QS(0.5634)PS(0.0372)T(0.0372)NWS(0.0372)PAVPVK;
KPSPEPEGEVGPPK	KPS[79.9663]PEPEGEVGPPK	R	I	358	371	14	2	3S(79.9663)	sp|Q7Z5L9|I2BP2_HUMAN	Q7Z5L9	I2BP2_HUMAN	IRF2BP2	Interferon regulatory factor 2-binding protein 2			1	1.11492e+06	MS/MS	STY:79.9663@KPS(1.0000)PEPEGEVGPPK;
KPVTVSPTTPTSPTEGEAS	KPVTVSPTTPTSPTEGEAS[79.9663]	R	-	505	523	19	2	19S(79.9663)	sp|Q9Y6G9|DC1L1_HUMAN	Q9Y6G9	DC1L1_HUMAN	DYNC1LI1	Cytoplasmic dynein 1 light intermediate chain 1			2	1.1983369E7	MS/MS	STY:79.9663@KPVT(0.0161)VS(0.0077)PT(0.0077)T(0.0088)PT(0.0088)S(0.0088)PT(0.0116)EGEAS(0.9303);
KPVTVSPTTPTSPTEGEAS	KPVTVSPTTPTS[79.9663]PTEGEAS	R	-	505	523	19	2	12S(79.9663)	sp|Q9Y6G9|DC1L1_HUMAN	Q9Y6G9	DC1L1_HUMAN	DYNC1LI1	Cytoplasmic dynein 1 light intermediate chain 1			1	1.1983369E7	MS/MS	STY:79.9663@KPVT(0.0169)VS(0.0173)PT(0.0173)T(0.0062)PT(0.0067)S(0.4578)PT(0.4578)EGEAS(0.0199);
KPVTVSPTTPTSPTEGEAS	KPVT[79.9663]VSPTTPTSPTEGEAS	R	-	505	523	19	2	4T(79.9663)	sp|Q9Y6G9|DC1L1_HUMAN	Q9Y6G9	DC1L1_HUMAN	DYNC1LI1	Cytoplasmic dynein 1 light intermediate chain 1			1	1.1983369E7	MS/MS	STY:79.9663@KPVT(0.3743)VS(0.0996)PT(0.1270)T(0.1270)PT(0.1270)S(0.1270)PT(0.0073)EGEAS(0.0109);
KQDDSPPRPIIGPALPPGFIK	KQDDS[79.9663]PPRPIIGPALPPGFIK	K	S	101	121	21	3	5S(79.9663)	sp|Q8IXQ4|GPAM1_HUMAN	Q8IXQ4	GPAM1_HUMAN	GPALPP1	GPALPP motifs-containing protein 1			4	4373008	MS/MS	STY:79.9663@KQDDS(1.0000)PPRPIIGPALPPGFIK;
KQSLGELIGTLNAAK	KQSLGELIGT[79.9663]LNAAK	R	V	19	33	15	3	10T(79.9663)	sp|P60174|TPIS_HUMAN	P60174	TPIS_HUMAN	TPI1	Triosephosphate isomerase			1	977564	MS/MS	STY:79.9663@KQS(0.0543)LGELIGT(0.9457)LNAAK;
KRETDDEGEDD	KRET[79.9663]DDEGEDD	R	-	241	251	11	2	4T(79.9663)	sp|Q92688|AN32B_HUMAN	Q92688	AN32B_HUMAN	ANP32B	Acidic leucine-rich nuclear phosphoprotein 32 family member B			6	3.2516124E7	MS/MS	STY:79.9663@KRET(1.0000)DDEGEDD;
KTSDANETEDHLESLICK	KTSDANETEDHLES[79.9663]LIC[57.0215]K	R	V	20	37	18	3	14S(79.9663),17C(57.0215)	sp|Q09161|NCBP1_HUMAN	Q09161	NCBP1_HUMAN	NCBP1	Nuclear cap-binding protein subunit 1			1	3.85683e+06	MS/MS	STY:79.9663@KT(0.0775)S(0.0775)DANET(0.0775)EDHLES(0.7676)LICK;
KTSDANETEDHLESLICK	KTSDANET[79.9663]EDHLESLIC[57.0215]K	R	V	20	37	18	3	17C(57.0215),8T(79.9663)	sp|Q09161|NCBP1_HUMAN	Q09161	NCBP1_HUMAN	NCBP1	Nuclear cap-binding protein subunit 1			1	8630529	MS/MS	STY:79.9663@KT(0.3136)S(0.3136)DANET(0.3623)EDHLES(0.0105)LICK;
KTSDANETEDHLESLICK	KTS[79.9663]DANETEDHLESLIC[57.0215]K	R	V	20	37	18	3	17C(57.0215),3S(79.9663)	sp|Q09161|NCBP1_HUMAN	Q09161	NCBP1_HUMAN	NCBP1	Nuclear cap-binding protein subunit 1			1	9383561	MS/MS	STY:79.9663@KT(0.0350)S(0.8967)DANET(0.0495)EDHLES(0.0188)LICK;
KTSDANETEDHLESLICK	KT[79.9663]SDANETEDHLESLIC[57.0215]K	R	V	20	37	18	3	17C(57.0215),2T(79.9663)	sp|Q09161|NCBP1_HUMAN	Q09161	NCBP1_HUMAN	NCBP1	Nuclear cap-binding protein subunit 1			3	8630529	MS/MS	STY:79.9663@KT(0.4878)S(0.4878)DANET(0.0127)EDHLES(0.0117)LICK;
KTSTSPPPEK	KT[79.9663]STSPPPEK	K	S	219	228	10	2	2T(79.9663)	sp|Q9H1E3|NUCKS_HUMAN	Q9H1E3	NUCKS_HUMAN	NUCKS1	Nuclear ubiquitous casein and cyclin-dependent kinase substrate 1			1	6768337	MS/MS	STY:79.9663@KT(0.2500)S(0.2500)T(0.2500)S(0.2500)PPPEK;
KVEEEQEADEEDVSEEEAESK	KVEEEQEADEEDVS[79.9663]EEEAESK	K	E	234	254	21	3	14S(79.9663)	sp|Q9H3N1|TMX1_HUMAN	Q9H3N1	TMX1_HUMAN	TMX1	Thioredoxin-related transmembrane protein 1			1	1213150	MS/MS	STY:79.9663@KVEEEQEADEEDVS(0.5000)EEEAES(0.5000)K;
KVVVSPTK	KVVVSPT[79.9663]K	K	K	63	70	8	2	7T(79.9663)	sp|P19338|NUCL_HUMAN	P19338	NUCL_HUMAN	NCL	Nucleolin			2	1.9639524E7	MS/MS	STY:79.9663@KVVVS(0.0507)PT(0.9493)K;
KVVVSPTK	KVVVS[79.9663]PTK	K	K	63	70	8	2	5S(79.9663)	sp|P19338|NUCL_HUMAN	P19338	NUCL_HUMAN	NCL	Nucleolin			2	1.9639524E7	MS/MS	STY:79.9663@KVVVS(0.5000)PT(0.5000)K;
KVVVSPTKK	KVVVS[79.9663]PTKK	K	V	63	71	9	2	5S(79.9663)	sp|P19338|NUCL_HUMAN	P19338	NUCL_HUMAN	NCL	Nucleolin			2	663264	MS/MS	STY:79.9663@KVVVS(0.9136)PT(0.0864)KK;
LAAAEETAVSPR	LAAAEET[79.9663]AVSPR	R	K	139	150	12	2	7T(79.9663)	sp|Q9BUH6|PAXX_HUMAN	Q9BUH6	PAXX_HUMAN	PAXX	Protein PAXX			1	2.61649e+06	MS/MS	STY:79.9663@LAAAEET(0.5000)AVS(0.5000)PR;
LAPVPSPEPQK	LAPVPS[79.9663]PEPQK	K	P	199	209	11	2	6S(79.9663)	sp|Q96JM3|CHAP1_HUMAN	Q96JM3	CHAP1_HUMAN	CHAMP1	Chromosome alignment-maintaining phosphoprotein 1			1	2.02946e+06	MS/MS	STY:79.9663@LAPVPS(1.0000)PEPQK;
LASDDRPSPPR	LASDDRPS[79.9663]PPR	K	G	716	726	11	2	8S(79.9663)	sp|P98175|RBM10_HUMAN	P98175	RBM10_HUMAN	RBM10	RNA-binding protein 10			1	3.30828e+06	MS/MS	STY:79.9663@LAS(0.0569)DDRPS(0.9431)PPR;
LASPSGSTSSGLEVVAPEGTSAPGGGPGTLDDSATICR	LASPSGS[79.9663]TSSGLEVVAPEGTSAPGGGPGTLDDSATIC[57.0215]R	R	V	592	629	38	4	37C(57.0215),7S(79.9663)	sp|Q13263|TIF1B_HUMAN	Q13263	TIF1B_HUMAN	TRIM28	Transcription intermediary factor 1-beta			1	0	MS/MS	STY:79.9663@LAS(0.2132)PS(0.0034)GS(0.3724)T(0.0038)S(0.0038)S(0.0038)GLEVVAPEGT(0.0699)S(0.0699)APGGGPGT(0.0771)LDDS(0.0857)AT(0.0970)ICR;
LASDDRPSPPR	LAS[79.9663]DDRPSPPR	K	G	716	726	11	3	3S(79.9663)	sp|P98175|RBM10_HUMAN	P98175	RBM10_HUMAN	RBM10	RNA-binding protein 10			1	2.70609e+06	MS/MS	STY:79.9663@LAS(0.5000)DDRPS(0.5000)PPR;
LASPSGSTSSGLEVVAPEGTSAPGGGPGTLDDSATICR	LAS[79.9663]PSGSTSSGLEVVAPEGTSAPGGGPGTLDDSATIC[57.0215]R	R	V	592	629	38	3	37C(57.0215),3S(79.9663)	sp|Q13263|TIF1B_HUMAN	Q13263	TIF1B_HUMAN	TRIM28	Transcription intermediary factor 1-beta			1	1.8817996E7	MS/MS	STY:79.9663@LAS(0.4326)PS(0.4326)GS(0.0050)T(0.0050)S(0.0168)S(0.0081)GLEVVAPEGT(0.0133)S(0.0133)APGGGPGT(0.0236)LDDS(0.0249)AT(0.0249)ICR;
LCDDGPQLPTSPR	LC[57.0215]DDGPQLPT[79.9663]SPR	R	L	520	532	13	2	10T(79.9663),2C(57.0215)	sp|O60504|VINEX_HUMAN	O60504	VINEX_HUMAN	SORBS3	Vinexin			3	6.97763e+06	MS/MS	STY:79.9663@LCDDGPQLPT(0.5000)S(0.5000)PR;
LCDFGSASHVADNDITPYLVSR	LC[57.0215]DFGSASHVADNDITPYLVS[79.9663]R	K	F	832	853	22	3	21S(79.9663),2C(57.0215)	sp|Q13523|PRP4K_HUMAN	Q13523	PRP4K_HUMAN	PRP4K	Serine/threonine-protein kinase PRP4 homolog			1	7.1672e+06	MS/MS	STY:79.9663@LCDFGS(0.2152)AS(0.2152)HVADNDIT(0.0078)PY(0.0083)LVS(0.5536)R;
LCDFGSASHVADNDITPYLVSR	LC[57.0215]DFGSASHVADNDITPY[79.9663]LVSR	K	F	832	853	22	3	18Y(79.9663),2C(57.0215)	sp|Q13523|PRP4K_HUMAN	Q13523	PRP4K_HUMAN	PRP4K	Serine/threonine-protein kinase PRP4 homolog			1	7624728	MS/MS	STY:79.9663@LCDFGS(0.0213)AS(0.0142)HVADNDIT(0.0094)PY(0.4776)LVS(0.4776)R;
LCDFGSASHVADNDITPYLVSR	LC[57.0215]DFGSASHVADNDIT[79.9663]PYLVSR	K	F	832	853	22	3	16T(79.9663),2C(57.0215)	sp|Q13523|PRP4K_HUMAN	Q13523	PRP4K_HUMAN	PRP4K	Serine/threonine-protein kinase PRP4 homolog			1	7624728	MS/MS	STY:79.9663@LCDFGS(0.0135)AS(0.0144)HVADNDIT(0.3240)PY(0.3240)LVS(0.3240)R;
LDQPVSAPPSPR	LDQPVS[79.9663]APPSPR	K	D	235	246	12	2	6S(79.9663)	sp|Q16204|CCDC6_HUMAN	Q16204	CCDC6_HUMAN	CCDC6	Coiled-coil domain-containing protein 6			1	2309249	MS/MS	STY:79.9663@LDQPVS(0.7506)APPS(0.2494)PR;
LDSSPSVSSTLAAK	LDSSPS[79.9663]VSSTLAAK	K	D	1225	1238	14	2	6S(79.9663)	sp|Q13428|TCOF_HUMAN	Q13428	TCOF_HUMAN	TCOF1	Treacle protein			1	9199357	MS/MS	STY:79.9663@LDS(0.0046)S(0.0046)PS(0.2477)VS(0.2477)S(0.2477)T(0.2477)LAAK;
LEASDCDHQQNSPTLERPGR	LEASDC[57.0215]DHQQNSPT[79.9663]LERPGR	K	K	106	125	20	3	14T(79.9663),6C(57.0215)	sp|Q9HAN9|NMNA1_HUMAN	Q9HAN9	NMNA1_HUMAN	NMNAT1	Nicotinamide/nicotinic acid mononucleotide adenylyltransferase 1			1	2.56602e+06	MS/MS	STY:79.9663@LEAS(0.0467)DCDHQQNS(0.0501)PT(0.9033)LERPGR;
LEEPPELNRQSPNPR	LEEPPELNRQS[79.9663]PNPR	K	R	165	179	15	2,3	11S(79.9663)	sp|Q7Z5L9|I2BP2_HUMAN	Q7Z5L9	I2BP2_HUMAN	IRF2BP2	Interferon regulatory factor 2-binding protein 2			4	1.204426E7	MS/MS	STY:79.9663@LEEPPELNRQS(1.0000)PNPR;
LEGVDGGQSPR	LEGVDGGQS[79.9663]PR	R	A	10	20	11	2	9S(79.9663)	sp|O00418|EF2K_HUMAN	O00418	EF2K_HUMAN	EEF2K	Eukaryotic elongation factor 2 kinase			1	0	MS/MS	STY:79.9663@LEGVDGGQS(1.0000)PR;
LEQTSVRDPSPEADAPVLGSPEK	LEQTSVRDPS[79.9663]PEADAPVLGSPEK	R	E	354	376	23	3	10S(79.9663)	sp|O15234|CASC3_HUMAN	O15234	CASC3_HUMAN	CASC3	Protein CASC3			2	1.86871e+06	MS/MS	STY:79.9663@LEQT(0.0189)S(0.0189)VRDPS(0.9440)PEADAPVLGS(0.0181)PEK;
LFDDSDER	LFDDS[79.9663]DER	K	G	717	724	8	2	5S(79.9663)	sp|O43719|HTSF1_HUMAN	O43719	HTSF1_HUMAN	HTATSF1	17S U2 SnRNP complex component HTATSF1			1	0	MS/MS	STY:79.9663@LFDDS(1.0000)DER;
LFDEEEDSSEK	LFDEEEDS[79.9663]SEK	K	L	706	716	11	2	8S(79.9663)	sp|O43719|HTSF1_HUMAN	O43719	HTSF1_HUMAN	HTATSF1	17S U2 SnRNP complex component HTATSF1			1	1.31165e+06	MS/MS	STY:79.9663@LFDEEEDS(0.5000)S(0.5000)EK;
LFEDDDSNEK	LFEDDDS[79.9663]NEK	K	L	696	705	10	2	7S(79.9663)	sp|O43719|HTSF1_HUMAN	O43719	HTSF1_HUMAN	HTATSF1	17S U2 SnRNP complex component HTATSF1			3	8057187	MS/MS	STY:79.9663@LFEDDDS(1.0000)NEK;
LFEESDDKEDEDADGK	LFEES[79.9663]DDKEDEDADGK	K	E	672	687	16	2,3	5S(79.9663)	sp|O43719|HTSF1_HUMAN	O43719	HTSF1_HUMAN	HTATSF1	17S U2 SnRNP complex component HTATSF1			2	4.05247e+06	MS/MS	STY:79.9663@LFEES(1.0000)DDKEDEDADGK;
LGAGEGGEASVSPEK	LGAGEGGEASVS[79.9663]PEK	K	T	1367	1381	15	2	12S(79.9663)	sp|Q13428|TCOF_HUMAN	Q13428	TCOF_HUMAN	TCOF1	Treacle protein			2	1.1995696E7	MS/MS	STY:79.9663@LGAGEGGEAS(0.0511)VS(0.9489)PEK;
LGAGEGGEASVSPEK	LGAGEGGEAS[79.9663]VSPEK	K	T	1367	1381	15	2	10S(79.9663)	sp|Q13428|TCOF_HUMAN	Q13428	TCOF_HUMAN	TCOF1	Treacle protein			2	1.1995696E7	MS/MS	STY:79.9663@LGAGEGGEAS(0.5000)VS(0.5000)PEK;
LGAGGGSPEK	LGAGGGS[79.9663]PEK	R	S	13	22	10	2	7S(79.9663)	sp|Q9UNE7|CHIP_HUMAN	Q9UNE7	CHIP_HUMAN	STUB1	E3 ubiquitin-protein ligase CHIP			1	8933278	MS/MS	STY:79.9663@LGAGGGS(1.0000)PEK;
LGAPENSGISTLER	LGAPENSGIS[79.9663]TLER	R	G	14	27	14	2	10S(79.9663)	sp|Q9Y4F1|FARP1_HUMAN	Q9Y4F1	FARP1_HUMAN	FARP1	FERM, ARHGEF and pleckstrin domain-containing protein 1			4	2.7713054E7	MS/MS	STY:79.9663@LGAPENS(0.0222)GIS(0.4889)T(0.4889)LER;
LGASNSPGQPNSVK	LGASNS[79.9663]PGQPNSVK	K	R	672	685	14	2	6S(79.9663)	sp|P49756|RBM25_HUMAN	P49756	RBM25_HUMAN	RBM25	RNA-binding protein 25			4	2.2940304E7	MS/MS	STY:79.9663@LGAS(0.0279)NS(0.9461)PGQPNS(0.0260)VK;
LGASNSPGQPNSVK	LGAS[79.9663]NSPGQPNSVK	K	R	672	685	14	2	4S(79.9663)	sp|P49756|RBM25_HUMAN	P49756	RBM25_HUMAN	RBM25	RNA-binding protein 25			4	2.2940304E7	MS/MS	STY:79.9663@LGAS(0.9437)NS(0.0282)PGQPNS(0.0282)VK;
LGDVSPTQIDVSQFGSFK	LGDVS[79.9663]PTQIDVSQFGSFK	K	E	1497	1514	18	2	5S(79.9663)	sp|P46821|MAP1B_HUMAN	P46821	MAP1B_HUMAN	MAP1B	Microtubule-associated protein 1B			1	2.6850946E7	MS/MS	STY:79.9663@LGDVS(0.3694)PT(0.3694)QIDVS(0.0627)QFGS(0.1986)FK;
LGGLRPESPESLTSVSR	LGGLRPESPES[79.9663]LTSVSR	R	T	11	27	17	2	11S(79.9663)	sp|Q9H6F5|CCD86_HUMAN	Q9H6F5	CCD86_HUMAN	CCDC86	Coiled-coil domain-containing protein 86			1	1.807695E7	MS/MS	STY:79.9663@LGGLRPES(0.0066)PES(0.2838)LT(0.2326)S(0.2385)VS(0.2385)R;
LGGLRPESPESLTSVSR	LGGLRPES[79.9663]PESLTSVSR	R	T	11	27	17	2	8S(79.9663)	sp|Q9H6F5|CCD86_HUMAN	Q9H6F5	CCD86_HUMAN	CCDC86	Coiled-coil domain-containing protein 86			6	1.807695E7	MS/MS	STY:79.9663@LGGLRPES(0.9472)PES(0.0132)LT(0.0132)S(0.0132)VS(0.0132)R;
LGHPEALSAGTGSPQPPSFTYAQQR	LGHPEALS[79.9663]AGTGSPQPPSFTYAQQR	K	E	296	320	25	3	8S(79.9663)	sp|Q15942|ZYX_HUMAN	Q15942	ZYX_HUMAN	ZYX	Zyxin			1	1.02764e+06	MS/MS	STY:79.9663@LGHPEALS(0.9056)AGT(0.0118)GS(0.0257)PQPPS(0.0190)FT(0.0190)Y(0.0190)AQQR;
LGIAVIHGEAQDAESDLVDGRHSPPMVR	LGIAVIHGEAQDAESDLVDGRHS[79.9663]PPMVR	R	S	205	232	28	4	23S(79.9663)	sp|O60256|KPRB_HUMAN	O60256	KPRB_HUMAN	PRPSAP2	Phosphoribosyl pyrophosphate synthase-associated protein 2			1	7418071	MS/MS	STY:79.9663@LGIAVIHGEAQDAES(0.0616)DLVDGRHS(0.9384)PPMVR;
LGPGRPLPTFPTSECTSDVEPDTR	LGPGRPLPTFPTSEC[57.0215]TSDVEPDT[79.9663]R	K	E	59	82	24	3	15C(57.0215),23T(79.9663)	sp|Q8TDD1|DDX54_HUMAN	Q8TDD1	DDX54_HUMAN	DDX54	ATP-dependent RNA helicase DDX54			1	2.29653e+06	MS/MS	STY:79.9663@LGPGRPLPT(0.0757)FPT(0.0757)S(0.1617)ECT(0.2801)S(0.0651)DVEPDT(0.3416)R;
LGPGRPLPTFPTSECTSDVEPDTR	LGPGRPLPTFPTSEC[57.0215]TS[79.9663]DVEPDTR	K	E	59	82	24	3	15C(57.0215),17S(79.9663)	sp|Q8TDD1|DDX54_HUMAN	Q8TDD1	DDX54_HUMAN	DDX54	ATP-dependent RNA helicase DDX54			1	1.0882992E7	MS/MS	STY:79.9663@LGPGRPLPT(0.0155)FPT(0.0533)S(0.0533)ECT(0.0097)S(0.8403)DVEPDT(0.0280)R;
LGPGRPLPTFPTSECTSDVEPDTR	LGPGRPLPTFPTSEC[57.0215]T[79.9663]SDVEPDTR	K	E	59	82	24	3	15C(57.0215),16T(79.9663)	sp|Q8TDD1|DDX54_HUMAN	Q8TDD1	DDX54_HUMAN	DDX54	ATP-dependent RNA helicase DDX54			1	1.0882992E7	MS/MS	STY:79.9663@LGPGRPLPT(0.0061)FPT(0.1751)S(0.1751)ECT(0.3190)S(0.3190)DVEPDT(0.0056)R;
LGSVLSPESPKPTPLTPLEPQK	LGSVLSPES[79.9663]PKPTPLTPLEPQK	K	P	137	158	22	3	9S(79.9663)	sp|Q96JM3|CHAP1_HUMAN	Q96JM3	CHAP1_HUMAN	CHAMP1	Chromosome alignment-maintaining phosphoprotein 1			1	683787	MS/MS	STY:79.9663@LGS(0.0552)VLS(0.2894)PES(0.6084)PKPT(0.0262)PLT(0.0208)PLEPQK;
LGVSVSPSR	LGVSVS[79.9663]PSR	K	A	529	537	9	2	6S(79.9663)	sp|Q86VM9|ZCH18_HUMAN	Q86VM9	ZCH18_HUMAN	ZC3H18	Zinc finger CCCH domain-containing protein 18			1	1.0010012E7	MS/MS	STY:79.9663@LGVS(0.0161)VS(0.4920)PS(0.4920)R;
LITSEEERSPAK	LITSEEERS[79.9663]PAK	K	R	1670	1681	12	2	9S(79.9663)	sp|Q12888|TP53B_HUMAN	Q12888	TP53B_HUMAN	TP53BP1	TP53-binding protein 1			2	1.49126e+06	MS/MS	STY:79.9663@LIT(0.0301)S(0.0301)EEERS(0.9397)PAK;
LKCGSGPVHISGQHLVAVEEDAESEDEEEEDVK	LKC[57.0215]GSGPVHISGQHLVAVEEDAES[79.9663]EDEEEEDVK	R	L	102	134	33	4	24S(79.9663),3C(57.0215)	sp|P06748|NPM_HUMAN	P06748	NPM_HUMAN	NPM1	Nucleophosmin			7	1.0584399E7	MS/MS	STY:79.9663@LKCGS(0.0261)GPVHIS(0.0261)GQHLVAVEEDAES(0.9479)EDEEEEDVK;
LKCGSGPVHISGQHLVAVEEDAESEDEEEEDVK	LKC[57.0215]GSGPVHIS[79.9663]GQHLVAVEEDAESEDEEEEDVK	R	L	102	134	33	4	11S(79.9663),3C(57.0215)	sp|P06748|NPM_HUMAN	P06748	NPM_HUMAN	NPM1	Nucleophosmin			1	2025127	MS/MS	STY:79.9663@LKCGS(0.0775)GPVHIS(0.4687)GQHLVAVEEDAES(0.4538)EDEEEEDVK;
LKCGSGPVHISGQHLVAVEEDAESEDEEEEDVK	LKC[57.0215]GS[79.9663]GPVHISGQHLVAVEEDAESEDEEEEDVK	R	L	102	134	33	4	3C(57.0215),5S(79.9663)	sp|P06748|NPM_HUMAN	P06748	NPM_HUMAN	NPM1	Nucleophosmin			1	7656047	MS/MS	STY:79.9663@LKCGS(0.4590)GPVHIS(0.4590)GQHLVAVEEDAES(0.0820)EDEEEEDVK;
LKSEDGVEGDLGETQSR	LKS[79.9663]EDGVEGDLGETQSR	R	T	133	149	17	2	3S(79.9663)	sp|Q09666|AHNK_HUMAN	Q09666	AHNK_HUMAN	AHNAK	Neuroblast differentiation-associated protein AHNAK			5	7.52019e+06	MS/MS	STY:79.9663@LKS(0.9482)EDGVEGDLGET(0.0259)QS(0.0259)R;
LLEDGEDFNLGDALDSSNSMQTIQK	LLEDGEDFNLGDALDS[79.9663]SNSMQTIQK	R	T	383	407	25	3	16S(79.9663)	sp|P05783|K1C18_HUMAN	P05783	K1C18_HUMAN	KRT18	Keratin, type I cytoskeletal 18			1	2.4977902E7	MS/MS	STY:79.9663@LLEDGEDFNLGDALDS(0.4858)S(0.4858)NS(0.0142)MQT(0.0142)IQK;
LLKPGEEPSEYTDEEDTK	LLKPGEEPSEYT[79.9663]DEEDTK	R	D	200	217	18	3	12T(79.9663)	sp|O15173|PGRC2_HUMAN	O15173	PGRC2_HUMAN	PGRMC2	Membrane-associated progesterone receptor component 2			1	2.0087038E7	MS/MS	STY:79.9663@LLKPGEEPS(0.0174)EY(0.0174)T(0.9241)DEEDT(0.0411)K;
LLKPGEEPSEYTDEEDTK	LLKPGEEPSEY[79.9663]TDEEDTK	R	D	200	217	18	2,3	11Y(79.9663)	sp|O15173|PGRC2_HUMAN	O15173	PGRC2_HUMAN	PGRMC2	Membrane-associated progesterone receptor component 2			3	2.5989436E7	MS/MS	STY:79.9663@LLKPGEEPS(0.0175)EY(0.9435)T(0.0184)DEEDT(0.0206)K;
LLKPGEEPSEYTDEEDTK	LLKPGEEPS[79.9663]EYTDEEDTK	R	D	200	217	18	2,3	9S(79.9663)	sp|O15173|PGRC2_HUMAN	O15173	PGRC2_HUMAN	PGRMC2	Membrane-associated progesterone receptor component 2			3	2.5989436E7	MS/MS	STY:79.9663@LLKPGEEPS(0.9114)EY(0.0170)T(0.0358)DEEDT(0.0358)K;
LLPEGEETLESDDEK	LLPEGEETLES[79.9663]DDEK	R	D	148	162	15	2	11S(79.9663)	sp|Q8N6N3|CA052_HUMAN	Q8N6N3	CA052_HUMAN	C1orf52	UPF0690 protein C1orf52			1	1.0066692E7	MS/MS	STY:79.9663@LLPEGEET(0.0510)LES(0.9490)DDEK;
LLSPQMSGEEEDSDLAAK	LLSPQMS[79.9663]GEEEDSDLAAK	K	L	1868	1885	18	2	7S(79.9663)	sp|P42858|HD_HUMAN	P42858	HD_HUMAN	HTT	Huntingtin			2	3.1258e+06	MS/MS	STY:79.9663@LLS(0.0287)PQMS(0.9389)GEEEDS(0.0324)DLAAK;
LLSISGK	LLS[79.9663]ISGK	K	R	135	141	7	2	3S(79.9663)	sp|P06748|NPM_HUMAN	P06748	NPM_HUMAN	NPM1	Nucleophosmin	CNTNAP4	sp|Q9C0A0|CNTP4_HUMAN	2	1.94983e+06	MS/MS	STY:79.9663@LLS(0.5000)IS(0.5000)GK;
LMHSSSLTNSSIPR	LMHSSSLTNS[79.9663]SIPR	K	F	370	383	14	2	10S(79.9663)	sp|Q08499|PDE4D_HUMAN	Q08499	PDE4D_HUMAN	PDE4D	3',5'-cyclic-AMP phosphodiesterase 4D			1	2.8905e+06	MS/MS	STY:79.9663@LMHS(0.0083)S(0.0083)S(0.0086)LT(0.0091)NS(0.4828)S(0.4828)IPR;
LMHSSSLTNSSIPR	LMHS[79.9663]SSLTNSSIPR	K	F	370	383	14	2	4S(79.9663)	sp|Q08499|PDE4D_HUMAN	Q08499	PDE4D_HUMAN	PDE4D	3',5'-cyclic-AMP phosphodiesterase 4D			1	0	MS/MS	STY:79.9663@LMHS(0.3277)S(0.3277)S(0.3277)LT(0.0057)NS(0.0057)S(0.0057)IPR;
LNEQASEEILK	LNEQAS[79.9663]EEILK	R	V	58	68	11	2	6S(79.9663)	sp|Q01105|SET_HUMAN	Q01105	SET_HUMAN	SET	Protein SET			1	1.00641e+06	MS/MS	STY:79.9663@LNEQAS(1.0000)EEILK;
LNHVAAGLVSPSLK	LNHVAAGLVS[79.9663]PSLK	K	S	198	211	14	2	10S(79.9663)	sp|Q05519|SRS11_HUMAN	Q05519	SRS11_HUMAN	SRSF11	Serine/arginine-rich splicing factor 11			2	0	MS/MS	STY:79.9663@LNHVAAGLVS(0.9479)PS(0.0521)LK;
LNQPGTPTR	LNQPGT[79.9663]PTR	R	T	389	397	9	2	6T(79.9663)	sp|P36507|MP2K2_HUMAN	P36507	MP2K2_HUMAN	MAP2K2	Dual specificity mitogen-activated protein kinase kinase 2			1	1.2605006E7	MS/MS	STY:79.9663@LNQPGT(0.5000)PT(0.5000)R;
LPDLSPVENK	LPDLS[79.9663]PVENK	K	E	2101	2110	10	2	5S(79.9663)	sp|Q9Y520|PRC2C_HUMAN	Q9Y520	PRC2C_HUMAN	PRRC2C	Protein PRRC2C			1	1.7683e+06	MS/MS	STY:79.9663@LPDLS(1.0000)PVENK;
LPISDSPPDTQEIHVIEQEK	LPISDSPPDT[79.9663]QEIHVIEQEK	K	L	1508	1527	20	3	10T(79.9663)	sp|Q8WYP5|ELYS_HUMAN	Q8WYP5	ELYS_HUMAN	AHCTF1	Protein ELYS			1	1.97695e+06	MS/MS	STY:79.9663@LPIS(0.2028)DS(0.2028)PPDT(0.5944)QEIHVIEQEK;
LPISDSPPDTQEIHVIEQEK	LPIS[79.9663]DSPPDTQEIHVIEQEK	K	L	1508	1527	20	3	4S(79.9663)	sp|Q8WYP5|ELYS_HUMAN	Q8WYP5	ELYS_HUMAN	AHCTF1	Protein ELYS			1	1.97695e+06	MS/MS	STY:79.9663@LPIS(0.4893)DS(0.4893)PPDT(0.0213)QEIHVIEQEK;
LPPTFFCGVCSDTDEDNGNGEDFQSELQK	LPPTFFC[57.0215]GVC[57.0215]S[79.9663]DTDEDNGNGEDFQSELQK	K	V	2731	2759	29	3	10C(57.0215),11S(79.9663),7C(57.0215)	sp|P49792|RBP2_HUMAN	P49792	RBP2_HUMAN	RANBP2	E3 SUMO-protein ligase RanBP2			1	4.72023e+06	MS/MS	STY:79.9663@LPPT(0.0134)FFCGVCS(0.4837)DT(0.4837)DEDNGNGEDFQS(0.0192)ELQK;
LPPTFFCGVCSDTDEDNGNGEDFQSELQK	LPPT[79.9663]FFC[57.0215]GVC[57.0215]SDTDEDNGNGEDFQSELQK	K	V	2731	2759	29	3	10C(57.0215),4T(79.9663),7C(57.0215)	sp|P49792|RBP2_HUMAN	P49792	RBP2_HUMAN	RANBP2	E3 SUMO-protein ligase RanBP2			1	3.28555e+06	MS/MS	STY:79.9663@LPPT(0.3896)FFCGVCS(0.3018)DT(0.0567)DEDNGNGEDFQS(0.2519)ELQK;
LPSGSGAASPTGSAVDIR	LPSGSGAAS[79.9663]PTGSAVDIR	R	A	208	225	18	2	9S(79.9663)	sp|Q09666|AHNK_HUMAN	Q09666	AHNK_HUMAN	AHNAK	Neuroblast differentiation-associated protein AHNAK			1	1.373646E7	MS/MS	STY:79.9663@LPS(0.0122)GS(0.0198)GAAS(0.3227)PT(0.3227)GS(0.3227)AVDIR;
LPSGSGAASPTGSAVDIR	LPSGS[79.9663]GAASPTGSAVDIR	R	A	208	225	18	2	5S(79.9663)	sp|Q09666|AHNK_HUMAN	Q09666	AHNK_HUMAN	AHNAK	Neuroblast differentiation-associated protein AHNAK			1	4.268912E7	MS/MS	STY:79.9663@LPS(0.0157)GS(0.7716)GAAS(0.1049)PT(0.0503)GS(0.0576)AVDIR;
LPSPTSPFSSLSQDQAATSK	LPSPTSPFSS[79.9663]LSQDQAATSK	R	A	986	1005	20	2	10S(79.9663)	sp|Q8WWI1|LMO7_HUMAN	Q8WWI1	LMO7_HUMAN	LMO7	LIM domain only protein 7			1	7.2517e+06	MS/MS	STY:79.9663@LPS(0.0136)PT(0.0136)S(0.0136)PFS(0.0156)S(0.8513)LS(0.0615)QDQAAT(0.0154)S(0.0154)K;
LPSGSGAASPTGSAVDIR	LPS[79.9663]GSGAASPTGSAVDIR	R	A	208	225	18	2	3S(79.9663)	sp|Q09666|AHNK_HUMAN	Q09666	AHNK_HUMAN	AHNAK	Neuroblast differentiation-associated protein AHNAK			4	4.268912E7	MS/MS	STY:79.9663@LPS(0.9452)GS(0.0131)GAAS(0.0131)PT(0.0131)GS(0.0154)AVDIR;
LPSGSGAASPTGSAVDIR	LPS[79.9663]GSGAAS[79.9663]PTGSAVDIR	R	A	208	225	18	2	3S(79.9663),9S(79.9663)	sp|Q09666|AHNK_HUMAN	Q09666	AHNK_HUMAN	AHNAK	Neuroblast differentiation-associated protein AHNAK			1	3.77785e+06	MS/MS	STY:79.9663@LPS(0.5982)GS(0.5982)GAAS(0.6816)PT(0.0617)GS(0.0603)AVDIR;
LPSGSGAASPTGSAVDIR	LPS[79.9663]GS[79.9663]GAASPTGSAVDIR	R	A	208	225	18	2	3S(79.9663),5S(79.9663)	sp|Q09666|AHNK_HUMAN	Q09666	AHNK_HUMAN	AHNAK	Neuroblast differentiation-associated protein AHNAK			1	3.77785e+06	MS/MS	STY:79.9663@LPS(0.4236)GS(0.4236)GAAS(0.3205)PT(0.4162)GS(0.4162)AVDIR;
LPSSPVYEDAASFK	LPS[79.9663]SPVYEDAASFK	R	A	415	428	14	2	3S(79.9663)	sp|Q14247|SRC8_HUMAN	Q14247	SRC8_HUMAN	CTTN	Src substrate cortactin			4	6.8149648E7	MS/MS	STY:79.9663@LPS(0.4878)S(0.4878)PVY(0.0115)EDAAS(0.0130)FK;
LQAALDDEEAGGRPAMEPGNGSLDLGGDSAGR	LQAALDDEEAGGRPAMEPGNGSLDLGGDS[79.9663]AGR	R	S	38	69	32	3	29S(79.9663)	sp|Q00839|HNRPU_HUMAN	Q00839	HNRPU_HUMAN	HNRNPU	Heterogeneous nuclear ribonucleoprotein U			1	0	MS/MS	STY:79.9663@LQAALDDEEAGGRPAMEPGNGS(0.0788)LDLGGDS(0.9212)AGR;
LQAALDDEEAGGRPAMEPGNGSLDLGGDSAGR	LQAALDDEEAGGRPAMEPGNGS[79.9663]LDLGGDSAGR	R	S	38	69	32	3	22S(79.9663)	sp|Q00839|HNRPU_HUMAN	Q00839	HNRPU_HUMAN	HNRNPU	Heterogeneous nuclear ribonucleoprotein U			5	1.4951148E7	MS/MS	STY:79.9663@LQAALDDEEAGGRPAMEPGNGS(0.9487)LDLGGDS(0.0513)AGR;
LQEEGGGSDEEETGSPSEDGMQSAR	LQEEGGGS[79.9663]DEEETGSPSEDGMQSAR	K	T	43	67	25	3	8S(79.9663)	sp|Q13610|PWP1_HUMAN	Q13610	PWP1_HUMAN	PWP1	Periodic tryptophan protein 1 homolog			1	4.22499e+06	MS/MS	STY:79.9663@LQEEGGGS(0.9319)DEEET(0.0164)GS(0.0164)PS(0.0136)EDGMQS(0.0216)AR;
LQGGKDFNMPLTISSLKDGGK	LQGGKDFNMPLT[79.9663]ISSLKDGGK	R	A	18	38	21	3	12T(79.9663)	sp|Q96HC4|PDLI5_HUMAN	Q96HC4	PDLI5_HUMAN	PDLIM5	PDZ and LIM domain protein 5			1	1.73306e+06	MS/MS	STY:79.9663@LQGGKDFNMPLT(0.9265)IS(0.0273)S(0.0462)LKDGGK;
LQPERGSPK	LQPERGS[79.9663]PK	R	K	723	731	9	2	7S(79.9663)	sp|Q9UKV3|ACINU_HUMAN	Q9UKV3	ACINU_HUMAN	ACIN1	Apoptotic chromatin condensation inducer in the nucleus			1	1.9102e+06	MS/MS	STY:79.9663@LQPERGS(1.0000)PK;
LQQGAGLESPQGQPEPGAASPQR	LQQGAGLESPQGQPEPGAAS[79.9663]PQR	R	Q	72	94	23	3	20S(79.9663)	sp|Q9H6F5|CCD86_HUMAN	Q9H6F5	CCD86_HUMAN	CCDC86	Coiled-coil domain-containing protein 86			3	3.2785938E7	MS/MS	STY:79.9663@LQQGAGLES(0.1638)PQGQPEPGAAS(0.8362)PQR;
LQQGAGLESPQGQPEPGAASPQR	LQQGAGLES[79.9663]PQGQPEPGAASPQR	R	Q	72	94	23	2,3	9S(79.9663)	sp|Q9H6F5|CCD86_HUMAN	Q9H6F5	CCD86_HUMAN	CCDC86	Coiled-coil domain-containing protein 86			2	3.2785938E7	MS/MS	STY:79.9663@LQQGAGLES(0.9140)PQGQPEPGAAS(0.0860)PQR;
LQQGAGLESPQGQPEPGAASPQR	LQQGAGLES[79.9663]PQGQPEPGAAS[79.9663]PQR	R	Q	72	94	23	3	20S(79.9663),9S(79.9663)	sp|Q9H6F5|CCD86_HUMAN	Q9H6F5	CCD86_HUMAN	CCDC86	Coiled-coil domain-containing protein 86			1	1.73232e+06	MS/MS	STY:79.9663@LQQGAGLES(1.0000)PQGQPEPGAAS(1.0000)PQR;
LQQQHSEQPPLQPSPVMTR	LQQQHSEQPPLQPS[79.9663]PVMTR	R	R	130	148	19	3	14S(79.9663)	sp|Q5JTV8|TOIP1_HUMAN	Q5JTV8	TOIP1_HUMAN	TOR1AIP1	Torsin-1A-interacting protein 1			3	1.1072167E7	MS/MS	STY:79.9663@LQQQHS(0.0188)EQPPLQPS(0.4906)PVMT(0.4906)R;
LQTTDNLLPMSPEEFDEVSR	LQTTDNLLPMS[79.9663]PEEFDEVSR	R	I	717	736	20	3	11S(79.9663)	sp|P42224|STAT1_HUMAN	P42224	STAT1_HUMAN	STAT1	Signal transducer and activator of transcription 1-alpha/beta			1	985334	MS/MS	STY:79.9663@LQT(0.0152)T(0.0152)DNLLPMS(0.4848)PEEFDEVS(0.4848)R;
LRLSPSPTSQR	LRLSPSPT[79.9663]SQR	R	S	387	397	11	2,3	8T(79.9663)	sp|P02545|LMNA_HUMAN	P02545	LMNA_HUMAN	LMNA	Prelamin-A/C			3	9.0264224E7	MS/MS	STY:79.9663@LRLS(0.4034)PS(0.0142)PT(0.5691)S(0.0132)QR;
LRLSPSPTSQR	LRLSPS[79.9663]PTSQR	R	S	387	397	11	2	6S(79.9663)	sp|P02545|LMNA_HUMAN	P02545	LMNA_HUMAN	LMNA	Prelamin-A/C			3	7.143264E7	MS/MS	STY:79.9663@LRLS(0.0085)PS(0.3305)PT(0.3305)S(0.3305)QR;
LRLSPSPTSQR	LRLS[79.9663]PSPTSQR	R	S	387	397	11	2	4S(79.9663)	sp|P02545|LMNA_HUMAN	P02545	LMNA_HUMAN	LMNA	Prelamin-A/C			7	7.143264E7	MS/MS	STY:79.9663@LRLS(0.9478)PS(0.0174)PT(0.0174)S(0.0174)QR;
LRLSPSPTSQR	LRLS[79.9663]PS[79.9663]PTSQR	R	S	387	397	11	2,3	4S(79.9663),6S(79.9663)	sp|P02545|LMNA_HUMAN	P02545	LMNA_HUMAN	LMNA	Prelamin-A/C			7	6.3073036E7	MS/MS	STY:79.9663@LRLS(0.9367)PS(0.9367)PT(0.0633)S(0.0633)QR;
LSPSPSSR	LSPSPS[79.9663]SR	K	V	390	397	8	2	6S(79.9663)	sp|P20700|LMNB1_HUMAN	P20700	LMNB1_HUMAN	LMNB1	Lamin-B1	LMNB2	sp|Q03252|LMNB2_HUMAN	1	4858988	MS/MS	STY:79.9663@LS(0.0409)PS(0.0137)PS(0.4727)S(0.4727)R;
LSPSPSSR	LSPS[79.9663]PSSR	K	V	390	397	8	2	4S(79.9663)	sp|P20700|LMNB1_HUMAN	P20700	LMNB1_HUMAN	LMNB1	Lamin-B1	LMNB2	sp|Q03252|LMNB2_HUMAN	1	4858988	MS/MS	STY:79.9663@LS(0.0078)PS(0.3307)PS(0.3307)S(0.3307)R;
LSPSPTSQR	LSPS[79.9663]PTSQR	R	S	389	397	9	2	4S(79.9663)	sp|P02545|LMNA_HUMAN	P02545	LMNA_HUMAN	LMNA	Prelamin-A/C			1	6.1501536E7	MS/MS	STY:79.9663@LS(0.0140)PS(0.7446)PT(0.1207)S(0.1207)QR;
LSSQISAGEEK	LSSQIS[79.9663]AGEEK	K	W	293	303	11	2	6S(79.9663)	sp|Q86UE4|LYRIC_HUMAN	Q86UE4	LYRIC_HUMAN	MTDH	Protein LYRIC			2	1.9331438E7	MS/MS	STY:79.9663@LS(0.0495)S(0.0602)QIS(0.8903)AGEEK;
LSVPTSDEEDEVPAPK	LSVPT[79.9663]SDEEDEVPAPK	K	P	104	119	16	2	5T(79.9663)	sp|Q8NE71|ABCF1_HUMAN	Q8NE71	ABCF1_HUMAN	ABCF1	ATP-binding cassette sub-family F member 1			1	1.0847124E7	MS/MS	STY:79.9663@LS(0.0160)VPT(0.4920)S(0.4920)DEEDEVPAPK;
LSDSPSMGR	LS[79.9663]DSPSMGR	K	Y	971	979	9	2	2S(79.9663)	sp|O60245|PCDH7_HUMAN	O60245	PCDH7_HUMAN	PCDH7	Protocadherin-7			1	2402889	MS/MS	STY:79.9663@LS(0.8792)DS(0.0604)PS(0.0604)MGR;
LSFGLEDEPLETATK	LS[79.9663]FGLEDEPLETATK	K	E	323	337	15	2	2S(79.9663)	sp|O94905|ERLN2_HUMAN	O94905	ERLN2_HUMAN	ERLIN2	Erlin-2			1	0	MS/MS	STY:79.9663@LS(0.8487)FGLEDEPLET(0.0757)AT(0.0757)K;
LSGGLGAGSCR	LS[79.9663]GGLGAGSC[57.0215]R	R	L	31	41	11	2	10C(57.0215),2S(79.9663)	sp|Q04695|K1C17_HUMAN	Q04695	K1C17_HUMAN	KRT17	Keratin, type I cytoskeletal 17			2	3.35956e+06	MS/MS	STY:79.9663@LS(0.9448)GGLGAGS(0.0552)CR;
LSLEGDHSTPPSAYGSVK	LS[79.9663]LEGDHSTPPSAYGSVK	K	A	11	28	18	2	2S(79.9663)	sp|P07355|ANXA2_HUMAN	P07355	ANXA2_HUMAN	ANXA2	Annexin A2	ANXA2P2	sp|A6NMY6|AXA2L_HUMAN	1	2.37196e+06	MS/MS	STY:79.9663@LS(0.9456)LEGDHS(0.0110)T(0.0110)PPS(0.0108)AY(0.0108)GS(0.0108)VK;
LSLTSDPEEGDPLALGPESPGEPQPPQLK	LS[79.9663]LTSDPEEGDPLALGPESPGEPQPPQLK	R	K	1096	1124	29	3	2S(79.9663)	sp|Q5T1M5|FKB15_HUMAN	Q5T1M5	FKB15_HUMAN	FKBP15	FK506-binding protein 15			1	3.31853e+06	MS/MS	STY:79.9663@LS(0.3061)LT(0.3061)S(0.3061)DPEEGDPLALGPES(0.0816)PGEPQPPQLK;
LSMEDSKSPPPK	LS[79.9663]MEDSKSPPPK	K	A	127	138	12	2	2S(79.9663)	sp|Q9NQG5|RPR1B_HUMAN	Q9NQG5	RPR1B_HUMAN	RPRD1B	Regulation of nuclear pre-mRNA domain-containing protein 1B			3	1.5774e+06	MS/MS	STY:79.9663@LS(0.3333)MEDS(0.3333)KS(0.3333)PPPK;
LSPSPTSQR	LS[79.9663]PSPTSQR	R	S	389	397	9	2	2S(79.9663)	sp|P02545|LMNA_HUMAN	P02545	LMNA_HUMAN	LMNA	Prelamin-A/C			2	6.1501536E7	MS/MS	STY:79.9663@LS(0.9460)PS(0.0180)PT(0.0180)S(0.0180)QR;
LSSPVLHR	LS[79.9663]SPVLHR	R	L	140	147	8	2	2S(79.9663)	sp|Q16643|DREB_HUMAN	Q16643	DREB_HUMAN	DBN1	Drebrin			3	1.1088274E7	MS/MS	STY:79.9663@LS(0.8903)S(0.1097)PVLHR;
LTPLPEDNSMNVDQDGDPSDR	LTPLPEDNS[79.9663]MNVDQDGDPSDR	K	M	3197	3217	21	3	9S(79.9663)	sp|P78527|PRKDC_HUMAN	P78527	PRKDC_HUMAN	PRKDC	DNA-dependent protein kinase catalytic subunit			1	0	MS/MS	STY:79.9663@LT(0.1149)PLPEDNS(0.8601)MNVDQDGDPS(0.0250)DR;
LTWHSCPEDEAQ	LTWHS[79.9663]C[57.0215]PEDEAQ	R	-	172	183	12	2	5S(79.9663),6C(57.0215)	sp|Q13185|CBX3_HUMAN	Q13185	CBX3_HUMAN	CBX3	Chromobox protein homolog 3			1	3611068	MS/MS	STY:79.9663@LT(0.0641)WHS(0.9359)CPEDEAQ;
LTTTGQVTSPVK	LT[79.9663]TTGQVTSPVK	K	G	202	213	12	2	2T(79.9663)	sp|P49916|DNLI3_HUMAN	P49916	DNLI3_HUMAN	LIG3	DNA ligase 3			1	0	MS/MS	STY:79.9663@LT(0.3270)T(0.3270)T(0.3270)GQVT(0.0096)S(0.0096)PVK;
LTYEIEDEKR	LT[79.9663]YEIEDEKR	R	R	1114	1123	10	3	2T(79.9663)	sp|P15924|DESP_HUMAN	P15924	DESP_HUMAN	DSP	Desmoplakin			2	363617	MS/MS	STY:79.9663@LT(0.5000)Y(0.5000)EIEDEKR;
LVEQANSPK	LVEQANS[79.9663]PK	K	H	209	217	9	2	7S(79.9663)	sp|O95391|SLU7_HUMAN	O95391	SLU7_HUMAN	SLU7	Pre-mRNA-splicing factor SLU7			2	0	MS/MS	STY:79.9663@LVEQANS(1.0000)PK;
LVSFHDDSDEDLLHI	LVSFHDDS[79.9663]DEDLLHI	K	-	2477	2491	15	2	8S(79.9663)	sp|P11717|MPRI_HUMAN	P11717	MPRI_HUMAN	IGF2R	Cation-independent mannose-6-phosphate receptor			1	8.37873e+06	MS/MS	STY:79.9663@LVS(0.2761)FHDDS(0.7239)DEDLLHI;
MALPPQEDATASPPR	MALPPQEDATAS[79.9663]PPR	K	Q	1168	1182	15	2	12S(79.9663)	sp|Q9UQ35|SRRM2_HUMAN	Q9UQ35	SRRM2_HUMAN	SRRM2	Serine/arginine repetitive matrix protein 2			1	7081917	MS/MS	STY:79.9663@MALPPQEDAT(0.3727)AS(0.6273)PPR;
MALPPQEDATASPPR	MALPPQEDAT[79.9663]ASPPR	K	Q	1168	1182	15	2	10T(79.9663)	sp|Q9UQ35|SRRM2_HUMAN	Q9UQ35	SRRM2_HUMAN	SRRM2	Serine/arginine repetitive matrix protein 2			1	4.44573e+06	MS/MS	STY:79.9663@MALPPQEDAT(0.5000)AS(0.5000)PPR;
MAPTPIPTRSPSDSSTASTPVAEQIER	MAPTPIPT[79.9663]RSPSDSSTASTPVAEQIER	R	A	328	354	27	3	8T(79.9663)	sp|Q16643|DREB_HUMAN	Q16643	DREB_HUMAN	DBN1	Drebrin			2	6512721	MS/MS	STY:79.9663@MAPT(0.0038)PIPT(0.3100)RS(0.3100)PS(0.3100)DS(0.0053)S(0.0261)T(0.0261)AS(0.0044)T(0.0043)PVAEQIER;
MDPNCSCAAGVSCTCAGSCK	MDPNC[57.0215]SC[57.0215]AAGVS[79.9663]C[57.0215]TC[57.0215]AGSC[57.0215]K	-	C	1	20	20	2	12S(79.9663),13C(57.0215),15C(57.0215),19C(57.0215),5C(57.0215),7C(57.0215)	sp|P04733|MT1F_HUMAN	P04733	MT1F_HUMAN	MT1F	Metallothionein-1F			1	1.1446674E7	MS/MS	STY:79.9663@MDPNCS(0.0158)CAAGVS(0.5038)CT(0.0140)CAGS(0.4664)CK;
MDPNCSCAAGVSCTCAGSCK	MDPNC[57.0215]S[79.9663]C[57.0215]AAGVSC[57.0215]TC[57.0215]AGSC[57.0215]K	-	C	1	20	20	2	13C(57.0215),15C(57.0215),19C(57.0215),5C(57.0215),6S(79.9663),7C(57.0215)	sp|P04733|MT1F_HUMAN	P04733	MT1F_HUMAN	MT1F	Metallothionein-1F			1	1.1446674E7	MS/MS	STY:79.9663@MDPNCS(0.8514)CAAGVS(0.0702)CT(0.0538)CAGS(0.0246)CK;
MEESFSSK	MEES[79.9663]FSSK	R	Y	382	389	8	2	4S(79.9663)	sp|P42167|LAP2B_HUMAN	P42167	LAP2B_HUMAN	TMPO	Lamina-associated polypeptide 2, isoforms beta/gamma			1	2.25514e+06	MS/MS	STY:79.9663@MEES(0.9475)FS(0.0263)S(0.0263)K;
MESEGGADDSAEEGDLLDDDDNEDRGDDQLELIK	MESEGGADDS[79.9663]AEEGDLLDDDDNEDRGDDQLELIK	K	D	251	284	34	3	10S(79.9663)	sp|P07910|HNRPC_HUMAN	P07910	HNRPC_HUMAN	HNRNPC	Heterogeneous nuclear ribonucleoproteins C1/C2			3	6.0441788E7	MS/MS	STY:79.9663@MES(0.0617)EGGADDS(0.9383)AEEGDLLDDDDNEDRGDDQLELIK;
MESEGGADDSAEEGDLLDDDDNEDRGDDQLELIKDDEK	MESEGGADDS[79.9663]AEEGDLLDDDDNEDRGDDQLELIKDDEK	K	E	251	288	38	4	10S(79.9663)	sp|P07910|HNRPC_HUMAN	P07910	HNRPC_HUMAN	HNRNPC	Heterogeneous nuclear ribonucleoproteins C1/C2			1	7.26147e+06	MS/MS	STY:79.9663@MES(0.0526)EGGADDS(0.9474)AEEGDLLDDDDNEDRGDDQLELIKDDEK;
MESEGGADDSAEEGDLLDDDDNEDR	MES[79.9663]EGGADDSAEEGDLLDDDDNEDR	K	G	251	275	25	3	3S(79.9663)	sp|P07910|HNRPC_HUMAN	P07910	HNRPC_HUMAN	HNRNPC	Heterogeneous nuclear ribonucleoproteins C1/C2			1	0	MS/MS	STY:79.9663@MES(0.5000)EGGADDS(0.5000)AEEGDLLDDDDNEDR;
MESEGGADDSAEEGDLLDDDDNEDRGDDQLELIK	MES[79.9663]EGGADDSAEEGDLLDDDDNEDRGDDQLELIK	K	D	251	284	34	3	3S(79.9663)	sp|P07910|HNRPC_HUMAN	P07910	HNRPC_HUMAN	HNRNPC	Heterogeneous nuclear ribonucleoproteins C1/C2			1	3.2085428E7	MS/MS	STY:79.9663@MES(0.5000)EGGADDS(0.5000)AEEGDLLDDDDNEDRGDDQLELIK;
METEADAPSPAPSLGER	METEADAPSPAPS[79.9663]LGER	K	L	1593	1609	17	2	13S(79.9663)	sp|Q12873|CHD3_HUMAN	Q12873	CHD3_HUMAN	CHD3	Chromodomain-helicase-DNA-binding protein 3			1	4.05965e+06	MS/MS	STY:79.9663@MET(0.0271)EADAPS(0.0280)PAPS(0.9449)LGER;
METVSNASSSSNPSSPGR	METVSNASSSSNPSS[79.9663]PGR	R	I	1152	1169	18	2	15S(79.9663)	sp|Q9NTI5|PDS5B_HUMAN	Q9NTI5	PDS5B_HUMAN	PDS5B	Sister chromatid cohesion protein PDS5 homolog B			1	1955864	MS/MS	STY:79.9663@MET(0.0079)VS(0.0077)NAS(0.0077)S(0.0082)S(0.0240)S(0.0240)NPS(0.0240)S(0.8966)PGR;
MGQAPSQSLLPPAQDQPRSPVPSAFSDQSR	MGQAPSQSLLPPAQDQPRSPVPSAFSDQS[79.9663]R	R	C	2431	2460	30	3	29S(79.9663)	sp|Q9UQ35|SRRM2_HUMAN	Q9UQ35	SRRM2_HUMAN	SRRM2	Serine/arginine repetitive matrix protein 2			3	2.6150376E7	MS/MS	STY:79.9663@MGQAPS(0.0205)QS(0.0205)LLPPAQDQPRS(0.0200)PVPS(0.0200)AFS(0.0200)DQS(0.8990)R;
MGQAPSQSLLPPAQDQPRSPVPSAFSDQSR	MGQAPSQSLLPPAQDQPRS[79.9663]PVPSAFSDQSR	R	C	2431	2460	30	3	19S(79.9663)	sp|Q9UQ35|SRRM2_HUMAN	Q9UQ35	SRRM2_HUMAN	SRRM2	Serine/arginine repetitive matrix protein 2			6	4.3182368E7	MS/MS	STY:79.9663@MGQAPS(0.0170)QS(0.0170)LLPPAQDQPRS(0.9144)PVPS(0.0178)AFS(0.0169)DQS(0.0169)R;
MGQAPSQSLLPPAQDQPRSPVPSAFSDQSR	MGQAPS[79.9663]QSLLPPAQDQPRSPVPSAFSDQSR	R	C	2431	2460	30	3	6S(79.9663)	sp|Q9UQ35|SRRM2_HUMAN	Q9UQ35	SRRM2_HUMAN	SRRM2	Serine/arginine repetitive matrix protein 2			1	8297753	MS/MS	STY:79.9663@MGQAPS(0.7085)QS(0.0148)LLPPAQDQPRS(0.0421)PVPS(0.0421)AFS(0.1799)DQS(0.0126)R;
MIGFPSSAGSVSPR	MIGFPSSAGSVS[79.9663]PR	K	S	416	429	14	2	12S(79.9663)	sp|P13646|K1C13_HUMAN	P13646	K1C13_HUMAN	KRT13	Keratin, type I cytoskeletal 13			1	5554297	MS/MS	STY:79.9663@MIGFPS(0.1608)S(0.1608)AGS(0.0127)VS(0.6657)PR;
MIGFPSSAGSVSPR	MIGFPSSAGS[79.9663]VSPR	K	S	416	429	14	2	10S(79.9663)	sp|P13646|K1C13_HUMAN	P13646	K1C13_HUMAN	KRT13	Keratin, type I cytoskeletal 13			1	5554297	MS/MS	STY:79.9663@MIGFPS(0.0126)S(0.0126)AGS(0.4874)VS(0.4874)PR;
MIGFPSSAGSVSPR	MIGFPS[79.9663]SAGSVSPR	K	S	416	429	14	2	6S(79.9663)	sp|P13646|K1C13_HUMAN	P13646	K1C13_HUMAN	KRT13	Keratin, type I cytoskeletal 13			1	5554297	MS/MS	STY:79.9663@MIGFPS(0.6614)S(0.0137)AGS(0.0137)VS(0.3111)PR;
MLPHAPGVQMQAIPEDAIPEESGDEDEDDPDKR	MLPHAPGVQMQAIPEDAIPEES[79.9663]GDEDEDDPDKR	R	I	372	404	33	3	22S(79.9663)	sp|Q13547|HDAC1_HUMAN	Q13547	HDAC1_HUMAN	HDAC1	Histone deacetylase 1			1	2597464	MS/MS	STY:79.9663@MLPHAPGVQMQAIPEDAIPEES(1.0000)GDEDEDDPDKR;
MLPHAPGVQMQAIPEDAVHEDSGDEDGEDPDKR	MLPHAPGVQMQAIPEDAVHEDS[79.9663]GDEDGEDPDKR	R	I	373	405	33	4	22S(79.9663)	sp|Q92769|HDAC2_HUMAN	Q92769	HDAC2_HUMAN	HDAC2	Histone deacetylase 2			5	1.015556E7	MS/MS	STY:79.9663@MLPHAPGVQMQAIPEDAVHEDS(1.0000)GDEDGEDPDKR;
MPEANQLHLPNLNSQVDSPSSEK	MPEANQLHLPNLNSQVDS[79.9663]PSSEK	K	S	733	755	23	3	18S(79.9663)	sp|Q9UPQ0|LIMC1_HUMAN	Q9UPQ0	LIMC1_HUMAN	LIMCH1	LIM and calponin homology domains-containing protein 1			2	1708619	MS/MS	STY:79.9663@MPEANQLHLPNLNS(0.0351)QVDS(0.9286)PS(0.0182)S(0.0182)EK;
MPQDGSDDEDEEWPTLEK	MPQDGS[79.9663]DDEDEEWPTLEK	R	A	93	110	18	2	6S(79.9663)	sp|Q13895|BYST_HUMAN	Q13895	BYST_HUMAN	BYSL	Bystin			1	4.42392e+06	MS/MS	STY:79.9663@MPQDGS(0.7719)DDEDEEWPT(0.2281)LEK;
MQNNSSPSISPNTSFTSDGSPSPLGGIK	MQNNSSPSISPNT[79.9663]SFTSDGSPSPLGGIK	R	R	466	493	28	3	13T(79.9663)	sp|Q9H0D6|XRN2_HUMAN	Q9H0D6	XRN2_HUMAN	XRN2	5'-3' exoribonuclease 2			1	0	MS/MS	STY:79.9663@MQNNS(0.0060)S(0.0060)PS(0.0060)IS(0.0062)PNT(0.9080)S(0.0063)FT(0.0074)S(0.0064)DGS(0.0244)PS(0.0232)PLGGIK;
MSPNETLFLESTNK	MSPNETLFLEST[79.9663]NK	K	I	85	98	14	2	12T(79.9663)	sp|Q9HB90|RRAGC_HUMAN	Q9HB90	RRAGC_HUMAN	RRAGC	Ras-related GTP-binding protein C	RRAGD	sp|Q9NQL2|RRAGD_HUMAN	1	0	MS/MS	STY:79.9663@MS(0.0175)PNET(0.0175)LFLES(0.0176)T(0.9475)NK;
MSQPGSPSPK	MSQPGSPS[79.9663]PK	K	T	1530	1539	10	2	8S(79.9663)	sp|Q14839|CHD4_HUMAN	Q14839	CHD4_HUMAN	CHD4	Chromodomain-helicase-DNA-binding protein 4			1	0	MS/MS	STY:79.9663@MS(0.0290)QPGS(0.0359)PS(0.9351)PK;
MSGFIYQGK	MS[79.9663]GFIYQGK	R	L	517	525	9	2	2S(79.9663)	sp|Q14155|ARHG7_HUMAN	Q14155	ARHG7_HUMAN	ARHGEF7	Rho guanine nucleotide exchange factor 7	ARHGEF6	sp|Q15052|ARHG6_HUMAN	2	3.18466e+06	MS/MS	STY:79.9663@MS(0.9496)GFIY(0.0504)QGK;
MSSPPSSPQK	MS[79.9663]SPPSSPQK	K	C	201	210	10	2	2S(79.9663)	sp|Q9Y2H6|FND3A_HUMAN	Q9Y2H6	FND3A_HUMAN	FNDC3A	Fibronectin type-III domain-containing protein 3A			2	2989803	MS/MS	STY:79.9663@MS(0.4883)S(0.4883)PPS(0.0117)S(0.0117)PQK;
MVIQGPSSPQGEAMVTDVLEDQK	MVIQGPSSPQGEAMVT[79.9663]DVLEDQK	K	E	1107	1129	23	3	16T(79.9663)	sp|Q12888|TP53B_HUMAN	Q12888	TP53B_HUMAN	TP53BP1	TP53-binding protein 1			1	0	MS/MS	STY:79.9663@MVIQGPS(0.2553)S(0.2553)PQGEAMVT(0.4895)DVLEDQK;
MESEGGADDSAEEGDLLDDDDNEDRGDDQLELIK	M[15.9949]ESEGGADDS[79.9663]AEEGDLLDDDDNEDRGDDQLELIK	K	D	251	284	34	3	10S(79.9663),1M(15.9949)	sp|P07910|HNRPC_HUMAN	P07910	HNRPC_HUMAN	HNRNPC	Heterogeneous nuclear ribonucleoproteins C1/C2			1	0	MS/MS	STY:79.9663@MES(0.0757)EGGADDS(0.9243)AEEGDLLDDDDNEDRGDDQLELIK;M:15.9949@M(1.0000)ESEGGADDSAEEGDLLDDDDNEDRGDDQLELIK;
MGQAPSQSLLPPAQDQPRSPVPSAFSDQSR	M[15.9949]GQAPSQSLLPPAQDQPRS[79.9663]PVPSAFSDQSR	R	C	2431	2460	30	3	19S(79.9663),1M(15.9949)	sp|Q9UQ35|SRRM2_HUMAN	Q9UQ35	SRRM2_HUMAN	SRRM2	Serine/arginine repetitive matrix protein 2			1	4338365	MS/MS	STY:79.9663@MGQAPS(0.0124)QS(0.0124)LLPPAQDQPRS(0.9358)PVPS(0.0107)AFS(0.0160)DQS(0.0126)R;M:15.9949@M(1.0000)GQAPSQSLLPPAQDQPRSPVPSAFSDQSR;
NAEAVLQSPGLSGK	NAEAVLQSPGLS[79.9663]GK	R	V	849	862	14	2	12S(79.9663)	sp|Q13045|FLII_HUMAN	Q13045	FLII_HUMAN	FLII	Protein flightless-1 homolog			1	2237145	MS/MS	STY:79.9663@NAEAVLQS(0.0511)PGLS(0.9489)GK;
NALFPEVFSPTPDENSDQNSR	NALFPEVFS[79.9663]PTPDENSDQNSR	R	S	567	587	21	3	9S(79.9663)	sp|Q8IVT2|MISP_HUMAN	Q8IVT2	MISP_HUMAN	MISP	Mitotic interactor and substrate of PLK1			1	0	MS/MS	STY:79.9663@NALFPEVFS(0.9469)PT(0.0182)PDENS(0.0175)DQNS(0.0175)R;
NALPPVLTTVNGQSPPEHSAPAK	NALPPVLTTVNGQSPPEHS[79.9663]APAK	K	V	130	152	23	3	19S(79.9663)	sp|Q6PKG0|LARP1_HUMAN	Q6PKG0	LARP1_HUMAN	LARP1	La-related protein 1			1	7.29546e+06	MS/MS	STY:79.9663@NALPPVLT(0.0517)T(0.0517)VNGQS(0.0173)PPEHS(0.8794)APAK;
NALPPVLTTVNGQSPPEHSAPAK	NALPPVLTTVNGQS[79.9663]PPEHSAPAK	K	V	130	152	23	3	14S(79.9663)	sp|Q6PKG0|LARP1_HUMAN	Q6PKG0	LARP1_HUMAN	LARP1	La-related protein 1			4	9194661	MS/MS	STY:79.9663@NALPPVLT(0.1862)T(0.0309)VNGQS(0.7623)PPEHS(0.0206)APAK;
NAPAAVDEGSISPR	NAPAAVDEGS[79.9663]ISPR	R	T	373	386	14	2	10S(79.9663)	sp|P28715|ERCC5_HUMAN	P28715	ERCC5_HUMAN	ERCC5	DNA excision repair protein ERCC-5			3	4.95695e+06	MS/MS	STY:79.9663@NAPAAVDEGS(0.5000)IS(0.5000)PR;
NDKSEEEQSSSSVK	NDKS[79.9663]EEEQSSSSVK	K	K	230	243	14	2	4S(79.9663)	sp|P07910|HNRPC_HUMAN	P07910	HNRPC_HUMAN	HNRNPC	Heterogeneous nuclear ribonucleoproteins C1/C2			1	3.89739e+06	MS/MS	STY:79.9663@NDKS(0.2000)EEEQS(0.2000)S(0.2000)S(0.2000)S(0.2000)VK;
NDSGEENVPLDLTR	NDS[79.9663]GEENVPLDLTR	R	E	19	32	14	2	3S(79.9663)	sp|Q6R327|RICTR_HUMAN	Q6R327	RICTR_HUMAN	RICTOR	Rapamycin-insensitive companion of mTOR			1	2748841	MS/MS	STY:79.9663@NDS(0.9015)GEENVPLDLT(0.0985)R;
NDSWGSFDLR	NDS[79.9663]WGSFDLR	R	A	650	659	10	2	3S(79.9663)	sp|Q7Z417|NUFP2_HUMAN	Q7Z417	NUFP2_HUMAN	NUFIP2	FMR1-interacting protein NUFIP2			1	0	MS/MS	STY:79.9663@NDS(0.9493)WGS(0.0507)FDLR;
NEEDEGHSNSSPR	NEEDEGHS[79.9663]NSSPR	K	H	73	85	13	2	8S(79.9663)	sp|Q14103|HNRPD_HUMAN	Q14103	HNRPD_HUMAN	HNRNPD	Heterogeneous nuclear ribonucleoprotein D0			5	1.9406416E7	MS/MS	STY:79.9663@NEEDEGHS(0.9282)NS(0.0441)S(0.0276)PR;
NEEPSEEEIDAPKPK	NEEPS[79.9663]EEEIDAPKPK	K	K	117	131	15	2	5S(79.9663)	sp|Q9NR30|DDX21_HUMAN	Q9NR30	DDX21_HUMAN	DDX21	Nucleolar RNA helicase 2			3	5478996	MS/MS	STY:79.9663@NEEPS(1.0000)EEEIDAPKPK;
NEGSESAPEGQAQQR	NEGSES[79.9663]APEGQAQQR	K	R	171	185	15	2	6S(79.9663)	sp|P67809|YBOX1_HUMAN	P67809	YBOX1_HUMAN	YBX1	Y-box-binding protein 1			4	1.9376878E7	MS/MS	STY:79.9663@NEGS(0.0545)ES(0.9455)APEGQAQQR;
NEGSESAPEGQAQQR	NEGS[79.9663]ESAPEGQAQQR	K	R	171	185	15	2,3	4S(79.9663)	sp|P67809|YBOX1_HUMAN	P67809	YBOX1_HUMAN	YBX1	Y-box-binding protein 1			9	2.0413926E7	MS/MS	STY:79.9663@NEGS(0.9477)ES(0.0523)APEGQAQQR;
NENTEGSPQEDGVELEGLK	NENT[79.9663]EGSPQEDGVELEGLK	K	Q	1241	1259	19	2	4T(79.9663)	sp|P11388|TOP2A_HUMAN	P11388	TOP2A_HUMAN	TOP2A	DNA topoisomerase 2-alpha			1	6692770	MS/MS	STY:79.9663@NENT(0.9319)EGS(0.0681)PQEDGVELEGLK;
NFYESDDDQK	NFYES[79.9663]DDDQK	K	E	272	281	10	2	5S(79.9663)	sp|O00203|AP3B1_HUMAN	O00203	AP3B1_HUMAN	AP3B1	AP-3 complex subunit beta-1			1	5304695	MS/MS	STY:79.9663@NFY(0.1779)ES(0.8221)DDDQK;
NHAAPFSK	NHAAPFS[79.9663]K	K	V	423	430	8	2	7S(79.9663)	sp|P34932|HSP74_HUMAN	P34932	HSP74_HUMAN	HSPA4	Heat shock 70 kDa protein 4	HSPH1	sp|Q92598|HS105_HUMAN	1	0	MS/MS	STY:79.9663@NHAAPFS(1.0000)K;
NHLSPQQGGATPQVPSPCCR	NHLS[79.9663]PQQGGATPQVPSPC[57.0215]C[57.0215]R	K	F	166	185	20	3	18C(57.0215),19C(57.0215),4S(79.9663)	sp|Q9H4L4|SENP3_HUMAN	Q9H4L4	SENP3_HUMAN	SENP3	Sentrin-specific protease 3			2	2.49149e+06	MS/MS	STY:79.9663@NHLS(0.7159)PQQGGAT(0.1048)PQVPS(0.1793)PCCR;
NKPGPNIESGNEDDDASFK	NKPGPNIESGNEDDDAS[79.9663]FK	K	I	206	224	19	2	17S(79.9663)	sp|O60841|IF2P_HUMAN	O60841	IF2P_HUMAN	EIF5B	Eukaryotic translation initiation factor 5B			2	7.86521e+06	MS/MS	STY:79.9663@NKPGPNIES(0.4628)GNEDDDAS(0.5372)FK;
NKPGPNIESGNEDDDASFK	NKPGPNIES[79.9663]GNEDDDASFK	K	I	206	224	19	2	9S(79.9663)	sp|O60841|IF2P_HUMAN	O60841	IF2P_HUMAN	EIF5B	Eukaryotic translation initiation factor 5B			3	7.86521e+06	MS/MS	STY:79.9663@NKPGPNIES(0.9473)GNEDDDAS(0.0527)FK;
NLVSPAYCTQESREEIPGGEAR	NLVSPAYC[57.0215]TQES[79.9663]REEIPGGEAR	R	T	94	115	22	3	12S(79.9663),8C(57.0215)	sp|Q9NUQ3|TXLNG_HUMAN	Q9NUQ3	TXLNG_HUMAN	TXLNG	Gamma-taxilin			1	3.70278e+06	MS/MS	STY:79.9663@NLVS(0.0187)PAY(0.0639)CT(0.0639)QES(0.8535)REEIPGGEAR;
NLVSPAYCTQESREEIPGGEAR	NLVS[79.9663]PAYC[57.0215]TQESREEIPGGEAR	R	T	94	115	22	3	4S(79.9663),8C(57.0215)	sp|Q9NUQ3|TXLNG_HUMAN	Q9NUQ3	TXLNG_HUMAN	TXLNG	Gamma-taxilin			1	3.70278e+06	MS/MS	STY:79.9663@NLVS(0.6737)PAY(0.0333)CT(0.0333)QES(0.2597)REEIPGGEAR;
NMTVEQLLTGSPTSPTVEPEKPTR	NMTVEQLLTGSPTS[79.9663]PTVEPEKPTR	K	E	826	849	24	3	14S(79.9663)	sp|Q9C0C9|UBE2O_HUMAN	Q9C0C9	UBE2O_HUMAN	UBE2O	(E3-independent) E2 ubiquitin-conjugating enzyme			1	0	MS/MS	STY:79.9663@NMT(0.1761)VEQLLT(0.0868)GS(0.0868)PT(0.0081)S(0.5535)PT(0.0053)VEPEKPT(0.0836)R;
NNNAGSFDSEGVASR	NNNAGSFDSEGVAS[79.9663]R	R	R	561	575	15	2	14S(79.9663)	sp|O75128|COBL_HUMAN	O75128	COBL_HUMAN	COBL	Protein cordon-bleu			1	0	MS/MS	STY:79.9663@NNNAGS(0.0429)FDS(0.0260)EGVAS(0.9311)R;
NNNAGSFDSEGVASR	NNNAGS[79.9663]FDSEGVASR	R	R	561	575	15	2	6S(79.9663)	sp|O75128|COBL_HUMAN	O75128	COBL_HUMAN	COBL	Protein cordon-bleu			1	0	MS/MS	STY:79.9663@NNNAGS(0.3333)FDS(0.3333)EGVAS(0.3333)R;
NNSQIASGQNQPQAAAGSHQLSMGQPHNAAGPSPHTLR	NNSQIASGQNQPQAAAGS[79.9663]HQLSMGQPHNAAGPSPHTLR	R	R	593	630	38	4	18S(79.9663)	sp|Q68EM7|RHG17_HUMAN	Q68EM7	RHG17_HUMAN	ARHGAP17	Rho GTPase-activating protein 17			1	3744713	MS/MS	STY:79.9663@NNS(0.0154)QIAS(0.0154)GQNQPQAAAGS(0.4651)HQLS(0.4651)MGQPHNAAGPS(0.0196)PHT(0.0193)LR;
NPSPPPPGR	NPS[79.9663]PPPPGR	R	D	4	12	9	2	3S(79.9663)	sp|Q96ER3|SAAL1_HUMAN	Q96ER3	SAAL1_HUMAN	SAAL1	Protein SAAL1			1	1.74625e+06	MS/MS	STY:79.9663@NPS(1.0000)PPPPGR;
NQGGGLSSSGAGEGQGPK	NQGGGLS[79.9663]SSGAGEGQGPK	K	K	992	1009	18	2	7S(79.9663)	sp|P07814|SYEP_HUMAN	P07814	SYEP_HUMAN	EPRS1	Bifunctional glutamate/proline--tRNA ligase			1	0	MS/MS	STY:79.9663@NQGGGLS(0.3333)S(0.3333)S(0.3333)GAGEGQGPK;
NSNSYGIPEPAHAYAQPQTTTPLPAVSGSPGAAITPLPSTQNGPVFAK	NSNS[79.9663]YGIPEPAHAYAQPQTTTPLPAVSGSPGAAITPLPSTQNGPVFAK	R	A	194	241	48	4	4S(79.9663)	sp|P46109|CRKL_HUMAN	P46109	CRKL_HUMAN	CRKL	Crk-like protein			1	0	MS/MS	STY:79.9663@NS(0.0052)NS(0.4996)Y(0.0048)GIPEPAHAY(0.1863)AQPQT(0.0640)T(0.0640)T(0.0640)PLPAVS(0.0640)GS(0.0251)PGAAIT(0.0092)PLPS(0.0069)T(0.0069)QNGPVFAK;
NSQGGPAPREPNLPTPMTSK	NSQGGPAPREPNLPT[79.9663]PMT[79.9663]S[79.9663]K	K	S	913	932	20	3	15T(79.9663),18T(79.9663),19S(79.9663)	sp|Q9UPQ9|TNR6B_HUMAN	Q9UPQ9	TNR6B_HUMAN	TNRC6B	Trinucleotide repeat-containing gene 6B protein			1	0	MS/MS	STY:79.9663@NS(0.6967)QGGPAPREPNLPT(0.7727)PMT(0.7653)S(0.7653)K;
NSSTDQGSDEEGSLQK	NSSTDQGSDEEGS[79.9663]LQK	K	E	1061	1076	16	2	13S(79.9663)	sp|Q12789|TF3C1_HUMAN	Q12789	TF3C1_HUMAN	GTF3C1	General transcription factor 3C polypeptide 1			1	0	MS/MS	STY:79.9663@NS(0.0324)S(0.0324)T(0.0324)DQGS(0.0324)DEEGS(0.8702)LQK;
NSSPAPPQPAPGK	NSS[79.9663]PAPPQPAPGK	K	V	1081	1093	13	2	3S(79.9663)	sp|Q9NYV4|CDK12_HUMAN	Q9NYV4	CDK12_HUMAN	CDK12	Cyclin-dependent kinase 12			1	1.85919e+06	MS/MS	STY:79.9663@NS(0.1768)S(0.8232)PAPPQPAPGK;
NSTPSEPGSGR	NST[79.9663]PSEPGSGR	K	G	198	208	11	2	3T(79.9663)	sp|P51858|HDGF_HUMAN	P51858	HDGF_HUMAN	HDGF	Hepatoma-derived growth factor			2	2.52904e+06	MS/MS	STY:79.9663@NS(0.0192)T(0.9458)PS(0.0176)EPGS(0.0174)GR;
NSPGSQVASNPR	NS[79.9663]PGSQVASNPR	R	Q	447	458	12	2	2S(79.9663)	sp|Q9H0D6|XRN2_HUMAN	Q9H0D6	XRN2_HUMAN	XRN2	5'-3' exoribonuclease 2			2	2.25286e+06	MS/MS	STY:79.9663@NS(0.8690)PGS(0.0244)QVAS(0.1065)NPR;
NSSPAPPQPAPGK	NS[79.9663]SPAPPQPAPGK	K	V	1081	1093	13	2	2S(79.9663)	sp|Q9NYV4|CDK12_HUMAN	Q9NYV4	CDK12_HUMAN	CDK12	Cyclin-dependent kinase 12			1	2.30671e+06	MS/MS	STY:79.9663@NS(0.5000)S(0.5000)PAPPQPAPGK;
NSTPSEPGSGR	NS[79.9663]TPSEPGSGR	K	G	198	208	11	2	2S(79.9663)	sp|P51858|HDGF_HUMAN	P51858	HDGF_HUMAN	HDGF	Hepatoma-derived growth factor			1	2.30105e+06	MS/MS	STY:79.9663@NS(0.3104)T(0.3104)PS(0.3104)EPGS(0.0689)GR;
NTEESSSPVRK	NTEESS[79.9663]SPVRK	R	E	104	114	11	2	6S(79.9663)	sp|Q5T200|ZC3HD_HUMAN	Q5T200	ZC3HD_HUMAN	ZC3H13	Zinc finger CCCH domain-containing protein 13			1	0	MS/MS	STY:79.9663@NT(0.0176)EES(0.0213)S(0.8924)S(0.0687)PVRK;
NVSSFPDDATSPLQENR	NVS[79.9663]SFPDDATSPLQENR	R	N	52	68	17	2	3S(79.9663)	sp|P52292|IMA1_HUMAN	P52292	IMA1_HUMAN	KPNA2	Importin subunit alpha-1			1	5.91216e+06	MS/MS	STY:79.9663@NVS(0.4881)S(0.4881)FPDDAT(0.0119)S(0.0119)PLQENR;
NWTEDMEGGISSPVK	NWTEDMEGGIS[79.9663]SPVK	R	K	312	326	15	2	11S(79.9663)	sp|P08651|NFIC_HUMAN	P08651	NFIC_HUMAN	NFIC	Nuclear factor 1 C-type			1	0	MS/MS	STY:79.9663@NWT(0.0811)EDMEGGIS(0.4595)S(0.4595)PVK;
NYQQNYQNSESGEK	NY[79.9663]QQNYQNSESGEK	R	N	157	170	14	2	2Y(79.9663)	sp|P67809|YBOX1_HUMAN	P67809	YBOX1_HUMAN	YBX1	Y-box-binding protein 1			2	6527503	MS/MS	STY:79.9663@NY(0.5950)QQNY(0.0181)QNS(0.1934)ES(0.1934)GEK;
PAETPVATSPTATDSTSGDSSR	PAETPVATSPT[79.9663]ATDSTSGDSSR	K	S	152	173	22	2,3	11T(79.9663)	sp|P54727|RD23B_HUMAN	P54727	RD23B_HUMAN	RAD23B	UV excision repair protein RAD23 homolog B			2	2.5476176E7	MS/MS	STY:79.9663@PAET(0.0061)PVAT(0.0060)S(0.0062)PT(0.9441)AT(0.0060)DS(0.0063)T(0.0063)S(0.0063)GDS(0.0063)S(0.0063)R;
PAETPVATSPTATDSTSGDSSR	PAETPVATS[79.9663]PTATDSTSGDSSR	K	S	152	173	22	2	9S(79.9663)	sp|P54727|RD23B_HUMAN	P54727	RD23B_HUMAN	RAD23B	UV excision repair protein RAD23 homolog B			1	1.1619371E7	MS/MS	STY:79.9663@PAET(0.0059)PVAT(0.0061)S(0.9448)PT(0.0059)AT(0.0061)DS(0.0061)T(0.0061)S(0.0060)GDS(0.0065)S(0.0065)R;
PAETPVATSPTATDSTSGDSSR	PAETPVAT[79.9663]SPTATDSTSGDSSR	K	S	152	173	22	2,3	8T(79.9663)	sp|P54727|RD23B_HUMAN	P54727	RD23B_HUMAN	RAD23B	UV excision repair protein RAD23 homolog B			2	2.5476176E7	MS/MS	STY:79.9663@PAET(0.0045)PVAT(0.3239)S(0.3239)PT(0.3239)AT(0.0042)DS(0.0039)T(0.0039)S(0.0039)GDS(0.0039)S(0.0039)R;
PAETPVATSPTATDSTSGDSSR	PAET[79.9663]PVATSPTATDSTSGDSSR	K	S	152	173	22	2,3	4T(79.9663)	sp|P54727|RD23B_HUMAN	P54727	RD23B_HUMAN	RAD23B	UV excision repair protein RAD23 homolog B			3	2.6215936E7	MS/MS	STY:79.9663@PAET(0.9397)PVAT(0.0080)S(0.0080)PT(0.0066)AT(0.0065)DS(0.0062)T(0.0062)S(0.0062)GDS(0.0062)S(0.0062)R;
PAGPAGDEPAESPSETPGPR	PAGPAGDEPAESPS[79.9663]ETPGPR	R	P	546	565	20	2	14S(79.9663)	sp|Q9NZT2|OGFR_HUMAN	Q9NZT2	OGFR_HUMAN	OGFR	Opioid growth factor receptor			1	1.63588e+06	MS/MS	STY:79.9663@PAGPAGDEPAES(0.0308)PS(0.4846)ET(0.4846)PGPR;
PAGPAGDEPAESPSETPGPSPAGPTR	PAGPAGDEPAESPS[79.9663]ETPGPSPAGPTR	R	D	566	591	26	3	14S(79.9663)	sp|Q9NZT2|OGFR_HUMAN	Q9NZT2	OGFR_HUMAN	OGFR	Opioid growth factor receptor			1	2.725e+06	MS/MS	STY:79.9663@PAGPAGDEPAES(0.0268)PS(0.4772)ET(0.4772)PGPS(0.0094)PAGPT(0.0094)R;
PAGPAGDEPAESPSETPGPR	PAGPAGDEPAES[79.9663]PSETPGPR	R	P	546	565	20	2	12S(79.9663)	sp|Q9NZT2|OGFR_HUMAN	Q9NZT2	OGFR_HUMAN	OGFR	Opioid growth factor receptor			1	1.63588e+06	MS/MS	STY:79.9663@PAGPAGDEPAES(0.9386)PS(0.0307)ET(0.0307)PGPR;
PAGPAGDEPAESPSETPGPSPAGPTR	PAGPAGDEPAES[79.9663]PSETPGPSPAGPTR	R	D	566	591	26	3	12S(79.9663)	sp|Q9NZT2|OGFR_HUMAN	Q9NZT2	OGFR_HUMAN	OGFR	Opioid growth factor receptor			1	2.725e+06	MS/MS	STY:79.9663@PAGPAGDEPAES(0.3169)PS(0.3169)ET(0.3169)PGPS(0.0135)PAGPT(0.0358)R;
PAMPQDSVPSPR	PAMPQDSVPS[79.9663]PR	K	S	472	483	12	2	10S(79.9663)	sp|P53396|ACLY_HUMAN	P53396	ACLY_HUMAN	ACLY	ATP-citrate synthase			3	1.6504488E7	MS/MS	STY:79.9663@PAMPQDS(0.0511)VPS(0.9489)PR;
PAMPQDSVPSPR	PAMPQDS[79.9663]VPSPR	K	S	472	483	12	2	7S(79.9663)	sp|P53396|ACLY_HUMAN	P53396	ACLY_HUMAN	ACLY	ATP-citrate synthase			5	1.6504488E7	MS/MS	STY:79.9663@PAMPQDS(0.9458)VPS(0.0542)PR;
PAMPQDSVPSPR	PAM[15.9949]PQDS[79.9663]VPSPR	K	S	472	483	12	2	3M(15.9949),7S(79.9663)	sp|P53396|ACLY_HUMAN	P53396	ACLY_HUMAN	ACLY	ATP-citrate synthase			1	860299	MS/MS	STY:79.9663@PAMPQDS(0.5000)VPS(0.5000)PR;M:15.9949@PAM(1.0000)PQDSVPSPR;
PAPPAPPPPQNLQPESDAPQQPGSSPR	PAPPAPPPPQNLQPESDAPQQPGS[79.9663]SPR	K	G	994	1020	27	3	24S(79.9663)	sp|Q9Y618|NCOR2_HUMAN	Q9Y618	NCOR2_HUMAN	NCOR2	Nuclear receptor corepressor 2			1	4236109	MS/MS	STY:79.9663@PAPPAPPPPQNLQPES(0.0198)DAPQQPGS(0.4901)S(0.4901)PR;
PAPPPQSQSPEVEQLGR	PAPPPQSQS[79.9663]PEVEQLGR	K	V	926	942	17	2,3	9S(79.9663)	sp|P52948|NUP98_HUMAN	P52948	NUP98_HUMAN	NUP98	Nuclear pore complex protein Nup98-Nup96			2	6593019	MS/MS	STY:79.9663@PAPPPQS(0.0559)QS(0.9441)PEVEQLGR;
PAPPPQSQSPEVEQLGR	PAPPPQS[79.9663]QSPEVEQLGR	K	V	926	942	17	2,3	7S(79.9663)	sp|P52948|NUP98_HUMAN	P52948	NUP98_HUMAN	NUP98	Nuclear pore complex protein Nup98-Nup96			5	6593019	MS/MS	STY:79.9663@PAPPPQS(0.7840)QS(0.2160)PEVEQLGR;
PAPPQEESPSSEAK	PAPPQEES[79.9663]PSSEAK	R	S	79	92	14	2	8S(79.9663)	sp|Q3KQU3|MA7D1_HUMAN	Q3KQU3	MA7D1_HUMAN	MAP7D1	MAP7 domain-containing protein 1			1	1.05315e+06	MS/MS	STY:79.9663@PAPPQEES(0.4829)PS(0.4829)S(0.0341)EAK;
PAPVSPESVK	PAPVS[79.9663]PESVK	K	A	210	219	10	2	5S(79.9663)	sp|Q96JM3|CHAP1_HUMAN	Q96JM3	CHAP1_HUMAN	CHAMP1	Chromosome alignment-maintaining phosphoprotein 1			1	2.52775e+06	MS/MS	STY:79.9663@PAPVS(0.9456)PES(0.0544)VK;
PASPTPVIVASHTANK	PASPTPVIVASHT[79.9663]ANK	K	E	857	872	16	2	13T(79.9663)	sp|P35606|COPB2_HUMAN	P35606	COPB2_HUMAN	COPB2	Coatomer subunit beta'			1	5.54512e+06	MS/MS	STY:79.9663@PAS(0.0184)PT(0.0184)PVIVAS(0.0201)HT(0.9430)ANK;
PASPTPVIVASHTANK	PAS[79.9663]PTPVIVASHTANK	K	E	857	872	16	2,3	3S(79.9663)	sp|P35606|COPB2_HUMAN	P35606	COPB2_HUMAN	COPB2	Coatomer subunit beta'			2	1.6572238E7	MS/MS	STY:79.9663@PAS(0.8670)PT(0.0170)PVIVAS(0.0580)HT(0.0580)ANK;
PATPGASSVEQLR	PAT[79.9663]PGASSVEQLR	R	K	13	25	13	2	3T(79.9663)	sp|Q9H3U1|UN45A_HUMAN	Q9H3U1	UN45A_HUMAN	UNC45A	Protein unc-45 homolog A			1	0	MS/MS	STY:79.9663@PAT(0.7329)PGAS(0.1336)S(0.1336)VEQLR;
PAVVAPAPVVEAVSTPSAAFPSDATAEQGPILTK	PAVVAPAPVVEAVSTPS[79.9663]AAFPSDATAEQGPILTK	K	H	490	523	34	4	17S(79.9663)	sp|Q12906|ILF3_HUMAN	Q12906	ILF3_HUMAN	ILF3	Interleukin enhancer-binding factor 3			1	0	MS/MS	STY:79.9663@PAVVAPAPVVEAVS(0.0114)T(0.0114)PS(0.9238)AAFPS(0.0104)DAT(0.0168)AEQGPILT(0.0261)K;
PGEEPSEYTDEEDTK	PGEEPS[79.9663]EYTDEEDTK	K	D	203	217	15	2	6S(79.9663)	sp|O15173|PGRC2_HUMAN	O15173	PGRC2_HUMAN	PGRMC2	Membrane-associated progesterone receptor component 2			2	0	MS/MS	STY:79.9663@PGEEPS(0.8856)EY(0.0450)T(0.0450)DEEDT(0.0245)K;
PGPAEAPSPTASPSGDASPPATAPYDPR	PGPAEAPSPTASPSGDAS[79.9663]PPATAPYDPR	K	V	1097	1124	28	3	18S(79.9663)	sp|Q9UPT8|ZC3H4_HUMAN	Q9UPT8	ZC3H4_HUMAN	ZC3H4	Zinc finger CCCH domain-containing protein 4			2	7.45238e+06	MS/MS	STY:79.9663@PGPAEAPS(0.0144)PT(0.0144)AS(0.0117)PS(0.0256)GDAS(0.9160)PPAT(0.0089)APY(0.0089)DPR;
PGPAEAPSPTASPSGDASPPATAPYDPR	PGPAEAPSPTASPS[79.9663]GDASPPATAPYDPR	K	V	1097	1124	28	3	14S(79.9663)	sp|Q9UPT8|ZC3H4_HUMAN	Q9UPT8	ZC3H4_HUMAN	ZC3H4	Zinc finger CCCH domain-containing protein 4			1	7.45238e+06	MS/MS	STY:79.9663@PGPAEAPS(0.0099)PT(0.0104)AS(0.0104)PS(0.9406)GDAS(0.0102)PPAT(0.0093)APY(0.0092)DPR;
PGPNIESGNEDDDASFK	PGPNIES[79.9663]GNEDDDASFK	K	I	208	224	17	2	7S(79.9663)	sp|O60841|IF2P_HUMAN	O60841	IF2P_HUMAN	EIF5B	Eukaryotic translation initiation factor 5B			1	0	MS/MS	STY:79.9663@PGPNIES(0.9458)GNEDDDAS(0.0542)FK;
PGPTPSGTNVGSSGRSPSK	PGPTPSGTNVGSSGRSPS[79.9663]K	M	A	2	20	19	3	18S(79.9663)	sp|P60468|SC61B_HUMAN	P60468	SC61B_HUMAN	SEC61B	Protein transport protein Sec61 subunit beta			1	7930352	MS/MS	STY:79.9663@PGPT(0.0137)PS(0.0203)GT(0.0203)NVGS(0.0125)S(0.0137)GRS(0.0137)PS(0.9058)K;
PGPTPSGTNVGSSGRSPSK	PGPTPSGTNVGSSGRS[79.9663]PSK	M	A	2	20	19	2,3	16S(79.9663)	sp|P60468|SC61B_HUMAN	P60468	SC61B_HUMAN	SEC61B	Protein transport protein Sec61 subunit beta			2	1.3867184E7	MS/MS	STY:79.9663@PGPT(0.0090)PS(0.0090)GT(0.0090)NVGS(0.0090)S(0.0090)GRS(0.9461)PS(0.0089)K;
PGPTPSGTNVGSSGRSPSK	PGPTPSGTNVGSS[79.9663]GRSPSK	M	A	2	20	19	3	13S(79.9663)	sp|P60468|SC61B_HUMAN	P60468	SC61B_HUMAN	SEC61B	Protein transport protein Sec61 subunit beta			1	7930352	MS/MS	STY:79.9663@PGPT(0.0104)PS(0.0104)GT(0.0106)NVGS(0.0108)S(0.3193)GRS(0.3193)PS(0.3193)K;
PGPTPSGTNVGSSGRSPSK	PGPTPSGTNVGS[79.9663]SGRSPSK	M	A	2	20	19	2,3	12S(79.9663)	sp|P60468|SC61B_HUMAN	P60468	SC61B_HUMAN	SEC61B	Protein transport protein Sec61 subunit beta			3	1.3867184E7	MS/MS	STY:79.9663@PGPT(0.0653)PS(0.0717)GT(0.0049)NVGS(0.3813)S(0.0080)GRS(0.2344)PS(0.2344)K;
PGPTPSGTNVGSSGRSPSK	PGPT[79.9663]PSGTNVGSSGRSPSK	M	A	2	20	19	2	4T(79.9663)	sp|P60468|SC61B_HUMAN	P60468	SC61B_HUMAN	SEC61B	Protein transport protein Sec61 subunit beta			1	5.93683e+06	MS/MS	STY:79.9663@PGPT(0.1972)PS(0.1972)GT(0.1972)NVGS(0.1972)S(0.1972)GRS(0.0069)PS(0.0069)K;
PIGPDDAIDALSSDFTCGSPTAAGK	PIGPDDAIDALSSDFT[79.9663]C[57.0215]GSPTAAGK	K	K	225	249	25	3	16T(79.9663),17C(57.0215)	sp|P20810|ICAL_HUMAN	P20810	ICAL_HUMAN	CAST	Calpastatin			2	1.2652058E7	MS/MS	STY:79.9663@PIGPDDAIDALS(0.0131)S(0.0134)DFT(0.4804)CGS(0.4804)PT(0.0128)AAGK;
PIPQTPESAGNK	PIPQT[79.9663]PESAGNK	K	H	666	677	12	2	5T(79.9663)	sp|P52948|NUP98_HUMAN	P52948	NUP98_HUMAN	NUP98	Nuclear pore complex protein Nup98-Nup96			3	2.12553e+06	MS/MS	STY:79.9663@PIPQT(0.9402)PES(0.0598)AGNK;
PKIEDVGSDEEDDSGK	PKIEDVGSDEEDDS[79.9663]GK	K	D	248	263	16	2	14S(79.9663)	sp|P08238|HS90B_HUMAN	P08238	HS90B_HUMAN	HSP90AB1	Heat shock protein HSP 90-beta	HSP90AB2P	sp|Q58FF8|H90B2_HUMAN	1	1.3744329E7	MS/MS	STY:79.9663@PKIEDVGS(0.4642)DEEDDS(0.5358)GK;
PKIEDVGSDEEDDSGK	PKIEDVGS[79.9663]DEEDDSGK	K	D	248	263	16	2	8S(79.9663)	sp|P08238|HS90B_HUMAN	P08238	HS90B_HUMAN	HSP90AB1	Heat shock protein HSP 90-beta	HSP90AB2P	sp|Q58FF8|H90B2_HUMAN	7	1.3744329E7	MS/MS	STY:79.9663@PKIEDVGS(0.9495)DEEDDS(0.0505)GK;
PKSPEPEATLTFPFLDK	PKSPEPEAT[79.9663]LTFPFLDK	K	M	716	732	17	3	9T(79.9663)	sp|Q9UPQ0|LIMC1_HUMAN	Q9UPQ0	LIMC1_HUMAN	LIMCH1	LIM and calponin homology domains-containing protein 1			1	2785970	MS/MS	STY:79.9663@PKS(0.4500)PEPEAT(0.5337)LT(0.0163)FPFLDK;
PKSPEPEATLTFPFLDK	PKS[79.9663]PEPEATLTFPFLDK	K	M	716	732	17	3	3S(79.9663)	sp|Q9UPQ0|LIMC1_HUMAN	Q9UPQ0	LIMC1_HUMAN	LIMCH1	LIM and calponin homology domains-containing protein 1			2	3.14539e+06	MS/MS	STY:79.9663@PKS(0.9452)PEPEAT(0.0274)LT(0.0274)FPFLDK;
PLEGSSSEDSPPEGQAPPSHSPR	PLEGSSSEDSPPEGQAPPSHS[79.9663]PR	R	G	1836	1858	23	3	21S(79.9663)	sp|Q12789|TF3C1_HUMAN	Q12789	TF3C1_HUMAN	GTF3C1	General transcription factor 3C polypeptide 1			1	2801942	MS/MS	STY:79.9663@PLEGS(0.0200)S(0.0222)S(0.0222)EDS(0.0222)PPEGQAPPS(0.0426)HS(0.8707)PR;
PLEGSSSEDSPPEGQAPPSHSPR	PLEGSSSEDSPPEGQAPPS[79.9663]HSPR	R	G	1836	1858	23	3	19S(79.9663)	sp|Q12789|TF3C1_HUMAN	Q12789	TF3C1_HUMAN	GTF3C1	General transcription factor 3C polypeptide 1			2	2801942	MS/MS	STY:79.9663@PLEGS(0.0089)S(0.0089)S(0.0102)EDS(0.0102)PPEGQAPPS(0.4809)HS(0.4809)PR;
PLSPDSR	PLS[79.9663]PDSR	K	A	360	366	7	2	3S(79.9663)	sp|Q9UHB6|LIMA1_HUMAN	Q9UHB6	LIMA1_HUMAN	LIMA1	LIM domain and actin-binding protein 1			1	9318092	MS/MS	STY:79.9663@PLS(0.9494)PDS(0.0506)R;
PNNSGEAPSSPTPK	PNNSGEAPSSPT[79.9663]PK	K	R	233	246	14	2	12T(79.9663)	sp|P49916|DNLI3_HUMAN	P49916	DNLI3_HUMAN	LIG3	DNA ligase 3			1	1109196	MS/MS	STY:79.9663@PNNS(0.4002)GEAPS(0.0163)S(0.0163)PT(0.5673)PK;
PPFGAAAVPGTQLSPSPTPASQSPK	PPFGAAAVPGTQLSPSPTPAS[79.9663]QS[79.9663]PK	R	K	866	890	25	3	21S(79.9663),23S(79.9663)	sp|O60641|AP180_HUMAN	O60641	AP180_HUMAN	SNAP91	Clathrin coat assembly protein AP180			1	1.2001679E7	MS/MS	STY:79.9663@PPFGAAAVPGT(0.5172)QLS(0.0228)PS(0.0228)PT(0.0228)PAS(0.6922)QS(0.7223)PK;
PQSMFEPPQVSSPVQEK	PQSMFEPPQVSS[79.9663]PVQEK	K	R	851	867	17	2,3	12S(79.9663)	sp|Q9Y2D5|PLAK2_HUMAN	Q9Y2D5	PLAK2_HUMAN	PALM2AKAP2	PALM2-AKAP2 fusion protein			2	4.95349e+06	MS/MS	STY:79.9663@PQS(0.0305)MFEPPQVS(0.0305)S(0.9390)PVQEK;
PQSMFEPPQVSSPVQEK	PQSMFEPPQVS[79.9663]SPVQEK	K	R	851	867	17	3	11S(79.9663)	sp|Q9Y2D5|PLAK2_HUMAN	Q9Y2D5	PLAK2_HUMAN	PALM2AKAP2	PALM2-AKAP2 fusion protein			1	1.58332e+06	MS/MS	STY:79.9663@PQS(0.0177)MFEPPQVS(0.4912)S(0.4912)PVQEK;
PQSMFEPPQVSSPVQEK	PQS[79.9663]MFEPPQVSSPVQEK	K	R	851	867	17	2	3S(79.9663)	sp|Q9Y2D5|PLAK2_HUMAN	Q9Y2D5	PLAK2_HUMAN	PALM2AKAP2	PALM2-AKAP2 fusion protein			1	3.37017e+06	MS/MS	STY:79.9663@PQS(0.9443)MFEPPQVS(0.0282)S(0.0275)PVQEK;
PQSPVIQAAAVSPK	PQS[79.9663]PVIQAAAVSPK	K	F	216	229	14	2	3S(79.9663)	sp|Q9Y6D5|BIG2_HUMAN	Q9Y6D5	BIG2_HUMAN	ARFGEF2	Brefeldin A-inhibited guanine nucleotide-exchange protein 2			1	0	MS/MS	STY:79.9663@PQS(0.5996)PVIQAAAVS(0.4004)PK;
PQVAAQSQPQSNVQGQSPVR	PQVAAQSQPQSNVQGQS[79.9663]PVR	K	V	2449	2468	20	3	17S(79.9663)	sp|Q12830|BPTF_HUMAN	Q12830	BPTF_HUMAN	BPTF	Nucleosome-remodeling factor subunit BPTF			1	0	MS/MS	STY:79.9663@PQVAAQS(0.0565)QPQS(0.0683)NVQGQS(0.8752)PVR;
PSMSPTPLDR	PSMS[79.9663]PTPLDR	R	C	2120	2129	10	2	4S(79.9663)	sp|Q9UQ35|SRRM2_HUMAN	Q9UQ35	SRRM2_HUMAN	SRRM2	Serine/arginine repetitive matrix protein 2			1	6.02804e+06	MS/MS	STY:79.9663@PS(0.0213)MS(0.4894)PT(0.4894)PLDR;
PSQVNGAPGSPTEPAGQK	PSQVNGAPGSPT[79.9663]EPAGQK	K	Q	1258	1275	18	2	12T(79.9663)	sp|Q9BQG0|MBB1A_HUMAN	Q9BQG0	MBB1A_HUMAN	MYBBP1A	Myb-binding protein 1A			3	1.1564824E7	MS/MS	STY:79.9663@PS(0.0360)QVNGAPGS(0.1535)PT(0.8104)EPAGQK;
PSQVNGAPGSPTEPAGQK	PSQVNGAPGS[79.9663]PTEPAGQK	K	Q	1258	1275	18	2	10S(79.9663)	sp|Q9BQG0|MBB1A_HUMAN	Q9BQG0	MBB1A_HUMAN	MYBBP1A	Myb-binding protein 1A			10	1.3050815E7	MS/MS	STY:79.9663@PS(0.0363)QVNGAPGS(0.9379)PT(0.0258)EPAGQK;
PSSSPVIFAGGQDR	PSS[79.9663]SPVIFAGGQDR	K	Y	186	199	14	2	3S(79.9663)	sp|Q15366|PCBP2_HUMAN	Q15366	PCBP2_HUMAN	PCBP2	Poly(rC)-binding protein 2			1	9897222	MS/MS	STY:79.9663@PS(0.0211)S(0.4894)S(0.4894)PVIFAGGQDR;
PSVPSADSETPLTQDRPGSPSGSEDK	PSVPSADSETPLTQDRPGSPSGS[79.9663]EDK	K	G	866	891	26	3	23S(79.9663)	sp|Q96FS4|SIPA1_HUMAN	Q96FS4	SIPA1_HUMAN	SIPA1	Signal-induced proliferation-associated protein 1			1	4.64519e+06	MS/MS	STY:79.9663@PS(0.0162)VPS(0.0511)ADS(0.0609)ET(0.0075)PLT(0.0218)QDRPGS(0.0218)PS(0.0105)GS(0.8102)EDK;
PSMSPTPLDR	PS[79.9663]MSPTPLDR	R	C	2120	2129	10	2	2S(79.9663)	sp|Q9UQ35|SRRM2_HUMAN	Q9UQ35	SRRM2_HUMAN	SRRM2	Serine/arginine repetitive matrix protein 2			2	6.02804e+06	MS/MS	STY:79.9663@PS(0.4920)MS(0.4920)PT(0.0160)PLDR;
PSQVNGAPGSPTEPAGQK	PS[79.9663]QVNGAPGSPTEPAGQK	K	Q	1258	1275	18	2	2S(79.9663)	sp|Q9BQG0|MBB1A_HUMAN	Q9BQG0	MBB1A_HUMAN	MYBBP1A	Myb-binding protein 1A			3	1.3050815E7	MS/MS	STY:79.9663@PS(0.9361)QVNGAPGS(0.0265)PT(0.0375)EPAGQK;
PSSSPVIFAGGQDR	PS[79.9663]SSPVIFAGGQDR	K	Y	186	199	14	2	2S(79.9663)	sp|Q15366|PCBP2_HUMAN	Q15366	PCBP2_HUMAN	PCBP2	Poly(rC)-binding protein 2			4	1.3882284E7	MS/MS	STY:79.9663@PS(0.3333)S(0.3333)S(0.3333)PVIFAGGQDR;
PTLLANGGHGVEGSDTTGSPTEFLEEK	PTLLANGGHGVEGSDTTGSPT[79.9663]EFLEEK	K	M	81	107	27	3	21T(79.9663)	sp|P27816|MAP4_HUMAN	P27816	MAP4_HUMAN	MAP4	Microtubule-associated protein 4			1	1.91715e+06	MS/MS	STY:79.9663@PT(0.0108)LLANGGHGVEGS(0.0113)DT(0.0138)T(0.0138)GS(0.1048)PT(0.8454)EFLEEK;
PTLLANGGHGVEGSDTTGSPTEFLEEK	PTLLANGGHGVEGSDTTGS[79.9663]PTEFLEEK	K	M	81	107	27	3	19S(79.9663)	sp|P27816|MAP4_HUMAN	P27816	MAP4_HUMAN	MAP4	Microtubule-associated protein 4			2	1.91715e+06	MS/MS	STY:79.9663@PT(0.0141)LLANGGHGVEGS(0.0158)DT(0.0158)T(0.0158)GS(0.9056)PT(0.0330)EFLEEK;
PTPGLSQGPGKETLESALIALDSEK	PTPGLSQGPGKET[79.9663]LESALIALDSEK	R	P	707	731	25	3	13T(79.9663)	sp|Q9H9B1|EHMT1_HUMAN	Q9H9B1	EHMT1_HUMAN	EHMT1	Histone-lysine N-methyltransferase EHMT1			1	1.4558054E7	MS/MS	STY:79.9663@PT(0.2767)PGLS(0.2767)QGPGKET(0.4237)LES(0.0156)ALIALDS(0.0073)EK;
PVAPQVPSPGGAPGQGPYPYSLSEPAPLTLDTSGK	PVAPQVPS[79.9663]PGGAPGQGPYPYSLSEPAPLTLDTSGK	K	N	376	410	35	3	8S(79.9663)	sp|Q9NZB2|F120A_HUMAN	Q9NZB2	F120A_HUMAN	FAM120A	Constitutive coactivator of PPAR-gamma-like protein 1	FAM120A2P	sp|Q5T035|CI129_HUMAN	1	0	MS/MS	STY:79.9663@PVAPQVPS(0.4450)PGGAPGQGPY(0.0051)PY(0.1432)S(0.1872)LS(0.0220)EPAPLT(0.0658)LDT(0.0658)S(0.0658)GK;
PVSGQDTSGNTEGSPAAEK	PVSGQDT[79.9663]SGNTEGSPAAEK	K	A	496	514	19	2	7T(79.9663)	sp|Q96S66|CLCC1_HUMAN	Q96S66	CLCC1_HUMAN	CLCC1	Chloride channel CLIC-like protein 1			1	0	MS/MS	STY:79.9663@PVS(0.0061)GQDT(0.2485)S(0.2485)GNT(0.2485)EGS(0.2485)PAAEK;
QAPPHIELSNSSPDPMAEAER	QAPPHIELS[79.9663]NSSPDPMAEAER	R	T	341	361	21	3	9S(79.9663)	sp|Q9Y2D5|PLAK2_HUMAN	Q9Y2D5	PLAK2_HUMAN	PALM2AKAP2	PALM2-AKAP2 fusion protein			1	0	MS/MS	STY:79.9663@QAPPHIELS(0.3333)NS(0.3333)S(0.3333)PDPMAEAER;
QASESSSRPH	QAS[79.9663]ESSSRPH	R	-	252	261	10	2	3S(79.9663)	sp|Q9BZX2|UCK2_HUMAN	Q9BZX2	UCK2_HUMAN	UCK2	Uridine-cytidine kinase 2			1	0	MS/MS	STY:79.9663@QAS(0.9450)ES(0.0183)S(0.0183)S(0.0183)RPH;
QASPTEVVER	QAS[79.9663]PTEVVER	R	L	180	189	10	2	3S(79.9663)	sp|Q8TB72|PUM2_HUMAN	Q8TB72	PUM2_HUMAN	PUM2	Pumilio homolog 2			2	2.59612e+06	MS/MS	STY:79.9663@QAS(0.9482)PT(0.0518)EVVER;
QASTDAGTAGALTPQHVR	QAS[79.9663]TDAGTAGALTPQHVR	R	A	107	124	18	3	3S(79.9663)	sp|P46937|YAP1_HUMAN	P46937	YAP1_HUMAN	YAP1	Transcriptional coactivator YAP1			3	9020775	MS/MS	STY:79.9663@QAS(0.4852)T(0.4852)DAGT(0.0182)AGALT(0.0114)PQHVR;
QDDDLNCEPLSPHNITPEPVSK	QDDDLNC[57.0215]EPLS[79.9663]PHNITPEPVSK	K	L	103	124	22	3	11S(79.9663),7C(57.0215)	sp|Q6VMQ6|MCAF1_HUMAN	Q6VMQ6	MCAF1_HUMAN	ATF7IP	Activating transcription factor 7-interacting protein 1			1	0	MS/MS	STY:79.9663@QDDDLNCEPLS(0.7958)PHNIT(0.1021)PEPVS(0.1021)K;
QDDSPPRPIIGPALPPGFIK	QDDS[79.9663]PPRPIIGPALPPGFIK	K	S	102	121	20	3	4S(79.9663)	sp|Q8IXQ4|GPAM1_HUMAN	Q8IXQ4	GPAM1_HUMAN	GPALPP1	GPALPP motifs-containing protein 1			1	1.21078e+06	MS/MS	STY:79.9663@QDDS(1.0000)PPRPIIGPALPPGFIK;
QDSPPPKPPR	QDS[79.9663]PPPKPPR	K	T	330	339	10	3	3S(79.9663)	sp|Q05209|PTN12_HUMAN	Q05209	PTN12_HUMAN	PTPN12	Tyrosine-protein phosphatase non-receptor type 12			2	499965	MS/MS	STY:79.9663@QDS(1.0000)PPPKPPR;
QEESESPVERPLK	QEES[79.9663]ESPVERPLK	K	E	306	318	13	2	4S(79.9663)	sp|Q96SB4|SRPK1_HUMAN	Q96SB4	SRPK1_HUMAN	SRPK1	SRSF protein kinase 1			2	2.39423e+06	MS/MS	STY:79.9663@QEES(0.8565)ES(0.1435)PVERPLK;
QERLSPEVAPPAHR	QERLS[79.9663]PEVAPPAHR	K	R	31	44	14	3	5S(79.9663)	sp|Q8TAD8|SNIP1_HUMAN	Q8TAD8	SNIP1_HUMAN	SNIP1	Smad nuclear-interacting protein 1			3	7192659	MS/MS	STY:79.9663@QERLS(1.0000)PEVAPPAHR;
QESDPEDDDVK	QES[79.9663]DPEDDDVK	R	K	98	108	11	2	3S(79.9663)	sp|Q9H307|PININ_HUMAN	Q9H307	PININ_HUMAN	PNN	Pinin			1	5.33894e+06	MS/MS	STY:79.9663@QES(1.0000)DPEDDDVK;
QFTSSSSIK	QFTSSS[79.9663]SIK	R	G	7	15	9	2	6S(79.9663)	sp|Q04695|K1C17_HUMAN	Q04695	K1C17_HUMAN	KRT17	Keratin, type I cytoskeletal 17			1	6.79867e+06	MS/MS	STY:79.9663@QFT(0.0093)S(0.0093)S(0.0093)S(0.4860)S(0.4860)IK;
QFTSSSSIK	QFT[79.9663]SSSSIK	R	G	7	15	9	2	3T(79.9663)	sp|Q04695|K1C17_HUMAN	Q04695	K1C17_HUMAN	KRT17	Keratin, type I cytoskeletal 17			1	7330835	MS/MS	STY:79.9663@QFT(0.3288)S(0.3288)S(0.3288)S(0.0068)S(0.0068)IK;
QGSITSPQANEQSVTPQRR	QGSITSPQANEQS[79.9663]VTPQRR	R	S	852	870	19	3	13S(79.9663)	sp|Q9UQ35|SRRM2_HUMAN	Q9UQ35	SRRM2_HUMAN	SRRM2	Serine/arginine repetitive matrix protein 2			1	3.84823e+06	MS/MS	STY:79.9663@QGS(0.0097)IT(0.0097)S(0.0097)PQANEQS(0.4854)VT(0.4854)PQRR;
QGSITSPQANEQSVTPQR	QGS[79.9663]ITSPQANEQSVTPQR	R	R	852	869	18	2,3	3S(79.9663)	sp|Q9UQ35|SRRM2_HUMAN	Q9UQ35	SRRM2_HUMAN	SRRM2	Serine/arginine repetitive matrix protein 2			2	3218199	MS/MS	STY:79.9663@QGS(0.4741)IT(0.4741)S(0.0298)PQANEQS(0.0109)VT(0.0109)PQR;
QGSPDQVSPVSEMTSTSLYQDK	QGS[79.9663]PDQVSPVSEMTSTSLYQDK	K	Q	1436	1457	22	3	3S(79.9663)	sp|P46821|MAP1B_HUMAN	P46821	MAP1B_HUMAN	MAP1B	Microtubule-associated protein 1B			1	0	MS/MS	STY:79.9663@QGS(0.9378)PDQVS(0.0079)PVS(0.0079)EMT(0.0077)S(0.0077)T(0.0077)S(0.0076)LY(0.0156)QDK;
QGSPVAAGAPAK	QGS[79.9663]PVAAGAPAK	R	Q	179	190	12	2	3S(79.9663)	sp|Q9NZI8|IF2B1_HUMAN	Q9NZI8	IF2B1_HUMAN	IGF2BP1	Insulin-like growth factor 2 mRNA-binding protein 1			6	1.6459382E7	MS/MS	STY:79.9663@QGS(1.0000)PVAAGAPAK;
QHEVEIPSPTQK	QHEVEIPS[79.9663]PTQK	K	E	341	352	12	2	8S(79.9663)	sp|Q08499|PDE4D_HUMAN	Q08499	PDE4D_HUMAN	PDE4D	3',5'-cyclic-AMP phosphodiesterase 4D			2	7113185	MS/MS	STY:79.9663@QHEVEIPS(0.5000)PT(0.5000)QK;
QISQDVK	QIS[79.9663]QDVK	R	L	112	118	7	2	3S(79.9663)	sp|Q01433|AMPD2_HUMAN	Q01433	AMPD2_HUMAN	AMPD2	AMP deaminase 2			1	8.0073e+06	MS/MS	STY:79.9663@QIS(1.0000)QDVK;
QKSDAEEDGGTVSQEEEDR	QKSDAEEDGGT[79.9663]VSQEEEDR	K	K	552	570	19	2,3	11T(79.9663)	sp|P27824|CALX_HUMAN	P27824	CALX_HUMAN	CANX	Calnexin			4	6.765624E7	MS/MS	STY:79.9663@QKS(0.0294)DAEEDGGT(0.9443)VS(0.0263)QEEEDR;
QKSDAEEDGGTVSQEEEDRK	QKSDAEEDGGT[79.9663]VSQEEEDRK	K	P	552	571	20	3	11T(79.9663)	sp|P27824|CALX_HUMAN	P27824	CALX_HUMAN	CANX	Calnexin			1	846625	MS/MS	STY:79.9663@QKS(0.0364)DAEEDGGT(0.9351)VS(0.0285)QEEEDRK;
QKSDAEEDGGTVSQEEEDR	QKSDAEEDGGT[79.9663]VS[79.9663]QEEEDR	K	K	552	570	19	3	11T(79.9663),13S(79.9663)	sp|P27824|CALX_HUMAN	P27824	CALX_HUMAN	CANX	Calnexin			1	2503152	MS/MS	STY:79.9663@QKS(0.6045)DAEEDGGT(0.6956)VS(0.6999)QEEEDR;
QKSDAEEDGGTVSQEEEDR	QKS[79.9663]DAEEDGGTVSQEEEDR	K	K	552	570	19	2,3	3S(79.9663)	sp|P27824|CALX_HUMAN	P27824	CALX_HUMAN	CANX	Calnexin			11	6.765624E7	MS/MS	STY:79.9663@QKS(0.9479)DAEEDGGT(0.0262)VS(0.0259)QEEEDR;
QLHLEGASLELSDDDTESK	QLHLEGASLELS[79.9663]DDDTESK	R	T	1945	1963	19	3	12S(79.9663)	sp|P35580|MYH10_HUMAN	P35580	MYH10_HUMAN	MYH10	Myosin-10			1	2056978	MS/MS	STY:79.9663@QLHLEGAS(0.0199)LELS(0.9425)DDDT(0.0188)ES(0.0188)K;
QLHLEGASLELSDDDTESK	QLHLEGAS[79.9663]LELSDDDTESK	R	T	1945	1963	19	3	8S(79.9663)	sp|P35580|MYH10_HUMAN	P35580	MYH10_HUMAN	MYH10	Myosin-10			2	5838178	MS/MS	STY:79.9663@QLHLEGAS(0.9401)LELS(0.0206)DDDT(0.0206)ES(0.0186)K;
QLPALDGSLMGPESPPAQEEEAPVSPHK	QLPALDGSLMGPESPPAQEEEAPVS[79.9663]PHK	R	K	615	642	28	3	25S(79.9663)	sp|Q8N9T8|KRI1_HUMAN	Q8N9T8	KRI1_HUMAN	KRI1	Protein KRI1 homolog			1	1.115271E7	MS/MS	STY:79.9663@QLPALDGS(0.0391)LMGPES(0.0271)PPAQEEEAPVS(0.9339)PHK;
QLPALDGSLMGPESPPAQEEEAPVSPHK	QLPALDGS[79.9663]LMGPESPPAQEEEAPVSPHK	R	K	615	642	28	3	8S(79.9663)	sp|Q8N9T8|KRI1_HUMAN	Q8N9T8	KRI1_HUMAN	KRI1	Protein KRI1 homolog			2	1.115271E7	MS/MS	STY:79.9663@QLPALDGS(0.4735)LMGPES(0.4513)PPAQEEEAPVS(0.0752)PHK;
QLSSGVSEIR	QLSSGVS[79.9663]EIR	R	H	80	89	10	2	7S(79.9663)	sp|P04792|HSPB1_HUMAN	P04792	HSPB1_HUMAN	HSPB1	Heat shock protein beta-1			2	3.93689792E8	MS/MS	STY:79.9663@QLS(0.0267)S(0.0307)GVS(0.9426)EIR;
QLSSGVSEIR	QLSS[79.9663]GVSEIR	R	H	80	89	10	2	4S(79.9663)	sp|P04792|HSPB1_HUMAN	P04792	HSPB1_HUMAN	HSPB1	Heat shock protein beta-1			1	7844713	MS/MS	STY:79.9663@QLS(0.0551)S(0.9195)GVS(0.0253)EIR;
QLSSGVSEIR	QLS[79.9663]SGVSEIR	R	H	80	89	10	2	3S(79.9663)	sp|P04792|HSPB1_HUMAN	P04792	HSPB1_HUMAN	HSPB1	Heat shock protein beta-1			10	3.93689792E8	MS/MS	STY:79.9663@QLS(0.9404)S(0.0298)GVS(0.0298)EIR;
QNPEQSADEDAEK	QNPEQS[79.9663]ADEDAEK	K	N	161	173	13	2	6S(79.9663)	sp|B5ME19|EIFCL_HUMAN	B5ME19	EIFCL_HUMAN	EIF3CL	Eukaryotic translation initiation factor 3 subunit C-like protein	EIF3C	sp|Q99613|EIF3C_HUMAN	7	2.8992984E7	MS/MS	STY:79.9663@QNPEQS(1.0000)ADEDAEK;
QNSQLPAQVQNGPSQEELEIQR	QNS[79.9663]QLPAQVQNGPSQEELEIQR	R	R	123	144	22	3	3S(79.9663)	sp|Q8N8S7|ENAH_HUMAN	Q8N8S7	ENAH_HUMAN	ENAH	Protein enabled homolog			1	1.32558e+06	MS/MS	STY:79.9663@QNS(0.7051)QLPAQVQNGPS(0.2949)QEELEIQR;
QPAQELSPTPGGTAHQALK	QPAQELS[79.9663]PTPGGTAHQALK	R	A	375	393	19	3	7S(79.9663)	sp|Q9UPN4|CP131_HUMAN	Q9UPN4	CP131_HUMAN	CEP131	Centrosomal protein of 131 kDa			1	1.77257e+06	MS/MS	STY:79.9663@QPAQELS(0.4919)PT(0.4919)PGGT(0.0162)AHQALK;
QPEYSPESPR	QPEY[79.9663]SPESPR	R	C	106	115	10	2	4Y(79.9663)	sp|Q9H6F5|CCD86_HUMAN	Q9H6F5	CCD86_HUMAN	CCDC86	Coiled-coil domain-containing protein 86			1	1.47325e+06	MS/MS	STY:79.9663@QPEY(0.4856)S(0.4856)PES(0.0287)PR;
QPGYQPPNPHPGPSSPPAAPASK	QPGYQPPNPHPGPS[79.9663]SPPAAPASK	R	R	148	170	23	3	14S(79.9663)	sp|Q9BUL9|RPP25_HUMAN	Q9BUL9	RPP25_HUMAN	RPP25	Ribonuclease P protein subunit p25			1	1911499	MS/MS	STY:79.9663@QPGY(0.0180)QPPNPHPGPS(0.3273)S(0.3273)PPAAPAS(0.3273)K;
QPLLLSEDEEDTK	QPLLLSEDEEDT[79.9663]K	K	R	34	46	13	2	12T(79.9663)	sp|B5ME19|EIFCL_HUMAN	B5ME19	EIFCL_HUMAN	EIF3CL	Eukaryotic translation initiation factor 3 subunit C-like protein	EIF3C	sp|Q99613|EIF3C_HUMAN	1	8630188	MS/MS	STY:79.9663@QPLLLS(0.0513)EDEEDT(0.9487)K;
QPLLLSEDEEDTKR	QPLLLS[79.9663]EDEEDTKR	K	V	34	47	14	3	6S(79.9663)	sp|B5ME19|EIFCL_HUMAN	B5ME19	EIFCL_HUMAN	EIF3CL	Eukaryotic translation initiation factor 3 subunit C-like protein	EIF3C	sp|Q99613|EIF3C_HUMAN	2	8466983	MS/MS	STY:79.9663@QPLLLS(0.9328)EDEEDT(0.0672)KR;
QPPPLAPQSPQGGVMGGSNSNQQQQMR	QPPPLAPQS[79.9663]PQGGVMGGSNSNQQQQMR	K	L	281	307	27	3	9S(79.9663)	sp|P46937|YAP1_HUMAN	P46937	YAP1_HUMAN	YAP1	Transcriptional coactivator YAP1			1	4.96377e+06	MS/MS	STY:79.9663@QPPPLAPQS(0.9360)PQGGVMGGS(0.0320)NS(0.0320)NQQQQMR;
QPSSPYEDK	QPSSPY[79.9663]EDK	K	D	330	338	9	2	6Y(79.9663)	sp|Q9UQ35|SRRM2_HUMAN	Q9UQ35	SRRM2_HUMAN	SRRM2	Serine/arginine repetitive matrix protein 2			1	4.97815e+06	MS/MS	STY:79.9663@QPS(0.0384)S(0.0384)PY(0.9232)EDK;
QPSWDPSPVSSTVPAPSPLSAAAVSPSK	QPSWDPSPVSST[79.9663]VPAPSPLSAAAVSPSK	R	L	105	132	28	3	12T(79.9663)	sp|Q9NQC3|RTN4_HUMAN	Q9NQC3	RTN4_HUMAN	RTN4	Reticulon-4			1	4.730528E7	MS/MS	STY:79.9663@QPS(0.0058)WDPS(0.0065)PVS(0.0147)S(0.0147)T(0.7564)VPAPS(0.0058)PLS(0.0920)AAAVS(0.0633)PS(0.0408)K;
QPSSPYEDK	QPS[79.9663]SPYEDK	K	D	330	338	9	2	3S(79.9663)	sp|Q9UQ35|SRRM2_HUMAN	Q9UQ35	SRRM2_HUMAN	SRRM2	Serine/arginine repetitive matrix protein 2			1	4.97815e+06	MS/MS	STY:79.9663@QPS(0.3333)S(0.3333)PY(0.3333)EDK;
QPSWDPSPVSSTVPAPSPLSAAAVSPSK	QPS[79.9663]WDPSPVSSTVPAPSPLSAAAVSPSK	R	L	105	132	28	3	3S(79.9663)	sp|Q9NQC3|RTN4_HUMAN	Q9NQC3	RTN4_HUMAN	RTN4	Reticulon-4			6	4.9447692E7	MS/MS	STY:79.9663@QPS(0.9380)WDPS(0.0087)PVS(0.0083)S(0.0075)T(0.0075)VPAPS(0.0066)PLS(0.0066)AAAVS(0.0083)PS(0.0083)K;
QPTGSDELKIGEWSGPNQPNSSTGAWDNQK	QPTGS[79.9663]DELKIGEWS[79.9663]GPNQPNSSTGAWDNQK	K	G	513	542	30	3	14S(79.9663),5S(79.9663)	sp|Q9UPQ9|TNR6B_HUMAN	Q9UPQ9	TNR6B_HUMAN	TNRC6B	Trinucleotide repeat-containing gene 6B protein			1	3.01524e+06	MS/MS	STY:79.9663@QPT(0.0378)GS(0.8927)DELKIGEWS(0.8532)GPNQPNS(0.0508)S(0.1103)T(0.0552)GAWDNQK;
QPTPPFFGR	QPT[79.9663]PPFFGR	R	D	204	212	9	2	3T(79.9663)	sp|Q96PK6|RBM14_HUMAN	Q96PK6	RBM14_HUMAN	RBM14	RNA-binding protein 14			3	1.1732532E7	MS/MS	STY:79.9663@QPT(1.0000)PPFFGR;
QPTPPSEAAASK	QPT[79.9663]PPSEAAASK	K	K	151	162	12	2	3T(79.9663)	sp|Q86UP2|KTN1_HUMAN	Q86UP2	KTN1_HUMAN	KTN1	Kinectin			4	2.67428e+06	MS/MS	STY:79.9663@QPT(0.6437)PPS(0.1781)EAAAS(0.1781)K;
QQAAYYAQTSPQGMPQHPPAPQGQ	QQAAYYAQTS[79.9663]PQGMPQHPPAPQGQ	R	-	621	644	24	3	10S(79.9663)	sp|Q96AE4|FUBP1_HUMAN	Q96AE4	FUBP1_HUMAN	FUBP1	Far upstream element-binding protein 1			1	4856434	MS/MS	STY:79.9663@QQAAY(0.0303)Y(0.0186)AQT(0.0191)S(0.9321)PQGMPQHPPAPQGQ;
QQAAYYAQTSPQGMPQHPPAPQGQ	QQAAYYAQT[79.9663]SPQGMPQHPPAPQGQ	R	-	621	644	24	3	9T(79.9663)	sp|Q96AE4|FUBP1_HUMAN	Q96AE4	FUBP1_HUMAN	FUBP1	Far upstream element-binding protein 1			1	4856434	MS/MS	STY:79.9663@QQAAY(0.0197)Y(0.0197)AQT(0.9091)S(0.0515)PQGMPQHPPAPQGQ;
QQGHEPVSPR	QQGHEPVS[79.9663]PR	K	S	504	513	10	3	8S(79.9663)	sp|Q9BTA9|WAC_HUMAN	Q9BTA9	WAC_HUMAN	WAC	WW domain-containing adapter protein with coiled-coil			1	763812	MS/MS	STY:79.9663@QQGHEPVS(1.0000)PR;
QQSLPPPK	QQS[79.9663]LPPPK	R	F	491	498	8	2	3S(79.9663)	sp|Q9UPQ0|LIMC1_HUMAN	Q9UPQ0	LIMC1_HUMAN	LIMCH1	LIM and calponin homology domains-containing protein 1			2	3.59898e+06	MS/MS	STY:79.9663@QQS(1.0000)LPPPK;
QSFDDNDSEELEDK	QSFDDNDS[79.9663]EELEDK	K	D	106	119	14	2	8S(79.9663)	sp|O60841|IF2P_HUMAN	O60841	IF2P_HUMAN	EIF5B	Eukaryotic translation initiation factor 5B			1	5881324	MS/MS	STY:79.9663@QS(0.2204)FDDNDS(0.7796)EELEDK;
QSHSESPSLQSK	QSHSESPS[79.9663]LQSK	R	S	1078	1089	12	2	8S(79.9663)	sp|Q9UQ35|SRRM2_HUMAN	Q9UQ35	SRRM2_HUMAN	SRRM2	Serine/arginine repetitive matrix protein 2			1	6178102	MS/MS	STY:79.9663@QS(0.1281)HS(0.1281)ES(0.1281)PS(0.6067)LQS(0.0089)K;
QSHSESPSLQSK	QSHSES[79.9663]PSLQSK	R	S	1078	1089	12	2	6S(79.9663)	sp|Q9UQ35|SRRM2_HUMAN	Q9UQ35	SRRM2_HUMAN	SRRM2	Serine/arginine repetitive matrix protein 2			1	6178102	MS/MS	STY:79.9663@QS(0.2167)HS(0.2167)ES(0.2796)PS(0.2796)LQS(0.0075)K;
QSNASSDVEVEEK	QSNAS[79.9663]SDVEVEEK	K	E	101	113	13	2	5S(79.9663)	sp|O75475|PSIP1_HUMAN	O75475	PSIP1_HUMAN	PSIP1	PC4 and SFRS1-interacting protein			2	2.8971084E7	MS/MS	STY:79.9663@QS(0.4262)NAS(0.5065)S(0.0672)DVEVEEK;
QSPASPPPLGGGAPVR	QSPAS[79.9663]PPPLGGGAPVR	R	T	1444	1459	16	2	5S(79.9663)	sp|Q14160|SCRIB_HUMAN	Q14160	SCRIB_HUMAN	SCRIB	Protein scribble homolog			1	1.0169868E7	MS/MS	STY:79.9663@QS(0.0764)PAS(0.9236)PPPLGGGAPVR;
QSSTPSAPELGQQPDVNISEWK	QSS[79.9663]TPSAPELGQQPDVNISEWK	R	D	699	720	22	3	3S(79.9663)	sp|Q93100|KPBB_HUMAN	Q93100	KPBB_HUMAN	PHKB	Phosphorylase b kinase regulatory subunit beta			1	0	MS/MS	STY:79.9663@QS(0.3409)S(0.3687)T(0.0077)PS(0.2437)APELGQQPDVNIS(0.0390)EWK;
QSDTSGPVTTSK	QS[79.9663]DT[79.9663]S[79.9663]GPVTTSK	R	S	1212	1223	12	2	2S(79.9663),4T(79.9663),5S(79.9663)	sp|P42858|HD_HUMAN	P42858	HD_HUMAN	HTT	Huntingtin			1	1.97534e+06	MS/MS	STY:79.9663@QS(0.5000)DT(0.5000)S(0.5000)GPVT(0.5000)T(0.5000)S(0.5000)K;
QSGDGQESTEPVENK	QS[79.9663]GDGQESTEPVENK	R	V	147	161	15	2	2S(79.9663)	sp|O15234|CASC3_HUMAN	O15234	CASC3_HUMAN	CASC3	Protein CASC3			1	0	MS/MS	STY:79.9663@QS(0.3333)GDGQES(0.3333)T(0.3333)EPVENK;
QSHSESPSLQSK	QS[79.9663]HSESPSLQSK	R	S	1078	1089	12	2	2S(79.9663)	sp|Q9UQ35|SRRM2_HUMAN	Q9UQ35	SRRM2_HUMAN	SRRM2	Serine/arginine repetitive matrix protein 2			1	0	MS/MS	STY:79.9663@QS(0.7370)HS(0.0657)ES(0.0657)PS(0.0657)LQS(0.0657)K;
QSNASSDVEVEEK	QS[79.9663]NASSDVEVEEK	K	E	101	113	13	2	2S(79.9663)	sp|O75475|PSIP1_HUMAN	O75475	PSIP1_HUMAN	PSIP1	PC4 and SFRS1-interacting protein			3	2.8971084E7	MS/MS	STY:79.9663@QS(0.5839)NAS(0.2080)S(0.2080)DVEVEEK;
QTPMASSPRPK	QTPMAS[79.9663]SPRPK	K	M	150	160	11	2	6S(79.9663)	sp|Q5SSJ5|HP1B3_HUMAN	Q5SSJ5	HP1B3_HUMAN	HP1BP3	Heterochromatin protein 1-binding protein 3			1	1.23197e+06	MS/MS	STY:79.9663@QT(0.0197)PMAS(0.4901)S(0.4901)PRPK;
QTPMASSPRPK	QT[79.9663]PMASSPRPK	K	M	150	160	11	2	2T(79.9663)	sp|Q5SSJ5|HP1B3_HUMAN	Q5SSJ5	HP1B3_HUMAN	HP1BP3	Heterochromatin protein 1-binding protein 3			2	1.23197e+06	MS/MS	STY:79.9663@QT(0.3333)PMAS(0.3333)S(0.3333)PRPK;
QVLQSTQSPR	QVLQS[79.9663]TQSPR	R	T	972	981	10	2	5S(79.9663)	sp|Q9Y2D5|PLAK2_HUMAN	Q9Y2D5	PLAK2_HUMAN	PALM2AKAP2	PALM2-AKAP2 fusion protein			1	0	MS/MS	STY:79.9663@QVLQS(0.3333)T(0.3333)QS(0.3333)PR;
QVSASELHTSGILGPETLR	QVSASELHT[79.9663]SGILGPETLR	R	D	2716	2734	19	3	9T(79.9663)	sp|P58107|EPIPL_HUMAN	P58107	EPIPL_HUMAN	EPPK1	Epiplakin			1	5.8785528E7	MS/MS	STY:79.9663@QVS(0.0141)AS(0.0141)ELHT(0.9452)S(0.0132)GILGPET(0.0133)LR;
QVSASELHTSGILGPETLR	QVSAS[79.9663]ELHTSGILGPETLR	R	D	2716	2734	19	3	5S(79.9663)	sp|P58107|EPIPL_HUMAN	P58107	EPIPL_HUMAN	EPPK1	Epiplakin			2	5.8785528E7	MS/MS	STY:79.9663@QVS(0.0134)AS(0.8664)ELHT(0.0850)S(0.0180)GILGPET(0.0172)LR;
QVSASELHTSGILGPETLR	QVS[79.9663]ASELHTSGILGPETLR	R	D	2716	2734	19	2,3	3S(79.9663)	sp|P58107|EPIPL_HUMAN	P58107	EPIPL_HUMAN	EPPK1	Epiplakin			5	8.3130504E7	MS/MS	STY:79.9663@QVS(0.9185)AS(0.0133)ELHT(0.0128)S(0.0235)GILGPET(0.0320)LR;
QVVSVVQDEEVGLPFEASPESPPPASPDGVTEIR	QVVSVVQDEEVGLPFEAS[79.9663]PESPPPASPDGVTEIR	K	G	621	654	34	3	18S(79.9663)	sp|Q96TA1|NIBA2_HUMAN	Q96TA1	NIBA2_HUMAN	NIBAN2	Protein Niban 2			1	2.4058326E7	MS/MS	STY:79.9663@QVVS(0.0605)VVQDEEVGLPFEAS(0.4156)PES(0.4156)PPPAS(0.0095)PDGVT(0.0987)EIR;
QVVSVVQDEEVGLPFEASPESPPPASPDGVTEIR	QVVS[79.9663]VVQDEEVGLPFEASPESPPPASPDGVTEIR	K	G	621	654	34	3	4S(79.9663)	sp|Q96TA1|NIBA2_HUMAN	Q96TA1	NIBA2_HUMAN	NIBAN2	Protein Niban 2			1	0	MS/MS	STY:79.9663@QVVS(0.2000)VVQDEEVGLPFEAS(0.2000)PES(0.2000)PPPAS(0.2000)PDGVT(0.2000)EIR;
RAGDLLEDSPK	RAGDLLEDS[79.9663]PK	R	R	157	167	11	2	9S(79.9663)	sp|P51858|HDGF_HUMAN	P51858	HDGF_HUMAN	HDGF	Hepatoma-derived growth factor			11	8.8323864E7	MS/MS	STY:79.9663@RAGDLLEDS(1.0000)PK;
RAPSVANVGSHCDLSLK	RAPSVANVGSHC[57.0215]DLS[79.9663]LK	R	I	2149	2165	17	3	12C(57.0215),15S(79.9663)	sp|P21333|FLNA_HUMAN	P21333	FLNA_HUMAN	FLNA	Filamin-A			2	1.7357862E7	MS/MS	STY:79.9663@RAPS(0.0263)VANVGS(0.0263)HCDLS(0.9474)LK;
RAPSVANVGSHCDLSLK	RAPSVANVGS[79.9663]HC[57.0215]DLSLK	R	I	2149	2165	17	2,3	10S(79.9663),12C(57.0215)	sp|P21333|FLNA_HUMAN	P21333	FLNA_HUMAN	FLNA	Filamin-A			3	5.7021604E7	MS/MS	STY:79.9663@RAPS(0.0269)VANVGS(0.9443)HCDLS(0.0289)LK;
RAPSVANVGSHCDLSLK	RAPS[79.9663]VANVGSHC[57.0215]DLSLK	R	I	2149	2165	17	2,3	12C(57.0215),4S(79.9663)	sp|P21333|FLNA_HUMAN	P21333	FLNA_HUMAN	FLNA	Filamin-A			22	5.7021604E7	MS/MS	STY:79.9663@RAPS(0.9480)VANVGS(0.0260)HCDLS(0.0259)LK;
RASPSPPPK	RAS[79.9663]PS[79.9663]PPPK	R	R	624	632	9	2	3S(79.9663),5S(79.9663)	sp|Q8IYB3|SRRM1_HUMAN	Q8IYB3	SRRM1_HUMAN	SRRM1	Serine/arginine repetitive matrix protein 1			1	0	MS/MS	STY:79.9663@RAS(1.0000)PS(1.0000)PPPK;
RDSFDDR	RDS[79.9663]FDDR	R	G	186	192	7	2	3S(79.9663)	sp|P43243|MATR3_HUMAN	P43243	MATR3_HUMAN	MATR3	Matrin-3			2	1.5088396E7	MS/MS	STY:79.9663@RDS(1.0000)FDDR;
RDSLEEGELR	RDS[79.9663]LEEGELR	K	D	45	54	10	2	3S(79.9663)	sp|P21127|CD11B_HUMAN	P21127	CD11B_HUMAN	CDK11B	Cyclin-dependent kinase 11B	CDK11A	sp|Q9UQ88|CD11A_HUMAN	2	1.97891e+06	MS/MS	STY:79.9663@RDS(1.0000)LEEGELR;
REEDEPEERSGDETPGSEVPGDK	REEDEPEERSGDET[79.9663]PGSEVPGDK	K	A	152	174	23	3	14T(79.9663)	sp|Q1KMD3|HNRL2_HUMAN	Q1KMD3	HNRL2_HUMAN	HNRNPUL2	Heterogeneous nuclear ribonucleoprotein U-like protein 2			2	9034238	MS/MS	STY:79.9663@REEDEPEERS(0.4449)GDET(0.5324)PGS(0.0227)EVPGDK;
REEDEPEERSGDETPGSEVPGDK	REEDEPEERS[79.9663]GDETPGSEVPGDK	K	A	152	174	23	3	10S(79.9663)	sp|Q1KMD3|HNRL2_HUMAN	Q1KMD3	HNRL2_HUMAN	HNRNPUL2	Heterogeneous nuclear ribonucleoprotein U-like protein 2			2	9034238	MS/MS	STY:79.9663@REEDEPEERS(0.9453)GDET(0.0274)PGS(0.0274)EVPGDK;
REESPMDVDQPSPSAQDTQSIASDGTPQGEK	REESPMDVDQPSPSAQDTQSIAS[79.9663]DGTPQGEK	R	E	3805	3835	31	3	23S(79.9663)	sp|Q7Z6Z7|HUWE1_HUMAN	Q7Z6Z7	HUWE1_HUMAN	HUWE1	E3 ubiquitin-protein ligase HUWE1			1	3.69283e+06	MS/MS	STY:79.9663@REES(0.0123)PMDVDQPS(0.2288)PS(0.3684)AQDT(0.0066)QS(0.0066)IAS(0.3698)DGT(0.0074)PQGEK;
REESPMDVDQPSPSAQDTQSIASDGTPQGEK	REESPMDVDQPS[79.9663]PSAQDTQSIASDGTPQGEK	R	E	3805	3835	31	3	12S(79.9663)	sp|Q7Z6Z7|HUWE1_HUMAN	Q7Z6Z7	HUWE1_HUMAN	HUWE1	E3 ubiquitin-protein ligase HUWE1			1	3.82517e+06	MS/MS	STY:79.9663@REES(0.0133)PMDVDQPS(0.9270)PS(0.0130)AQDT(0.0121)QS(0.0121)IAS(0.0121)DGT(0.0104)PQGEK;
REESPMDVDQPSPSAQDTQSIASDGTPQGEK	REES[79.9663]PMDVDQPSPSAQDTQSIASDGTPQGEK	R	E	3805	3835	31	3	4S(79.9663)	sp|Q7Z6Z7|HUWE1_HUMAN	Q7Z6Z7	HUWE1_HUMAN	HUWE1	E3 ubiquitin-protein ligase HUWE1			1	3.82517e+06	MS/MS	STY:79.9663@REES(0.4065)PMDVDQPS(0.0250)PS(0.0250)AQDT(0.1645)QS(0.1645)IAS(0.1072)DGT(0.1072)PQGEK;
RESPSPAPK	RES[79.9663]PSPAPK	K	P	448	456	9	2	3S(79.9663)	sp|Q8IYB3|SRRM1_HUMAN	Q8IYB3	SRRM1_HUMAN	SRRM1	Serine/arginine repetitive matrix protein 1			2	9012762	MS/MS	STY:79.9663@RES(0.9484)PS(0.0516)PAPK;
RGEGDAPFSEPGTTSTQRPSSPETATK	RGEGDAPFSEPGTTSTQRPSSPET[79.9663]ATK	R	Q	303	329	27	3	24T(79.9663)	sp|Q9UQ35|SRRM2_HUMAN	Q9UQ35	SRRM2_HUMAN	SRRM2	Serine/arginine repetitive matrix protein 2			3	6363245	MS/MS	STY:79.9663@RGEGDAPFS(0.1484)EPGT(0.0192)T(0.0192)S(0.0192)T(0.0192)QRPS(0.0192)S(0.0192)PET(0.7301)AT(0.0060)K;
RGEGDAPFSEPGTTSTQRPSSPETATK	RGEGDAPFSEPGTTSTQRPS[79.9663]SPETATK	R	Q	303	329	27	4	20S(79.9663)	sp|Q9UQ35|SRRM2_HUMAN	Q9UQ35	SRRM2_HUMAN	SRRM2	Serine/arginine repetitive matrix protein 2			1	3454312	MS/MS	STY:79.9663@RGEGDAPFS(0.0071)EPGT(0.0051)T(0.0051)S(0.0051)T(0.0113)QRPS(0.4422)S(0.0060)PET(0.2590)AT(0.2590)K;
RGEGDAPFSEPGTTSTQRPSSPETATK	RGEGDAPFS[79.9663]EPGTTSTQRPSSPETATK	R	Q	303	329	27	4	9S(79.9663)	sp|Q9UQ35|SRRM2_HUMAN	Q9UQ35	SRRM2_HUMAN	SRRM2	Serine/arginine repetitive matrix protein 2			1	3454312	MS/MS	STY:79.9663@RGEGDAPFS(0.8836)EPGT(0.0150)T(0.0110)S(0.0105)T(0.0105)QRPS(0.0105)S(0.0105)PET(0.0242)AT(0.0242)K;
RGESLDNLDSPR	RGES[79.9663]LDNLDSPR	R	S	1507	1518	12	2	4S(79.9663)	sp|Q8WWI1|LMO7_HUMAN	Q8WWI1	LMO7_HUMAN	LMO7	LIM domain only protein 7			1	5816436	MS/MS	STY:79.9663@RGES(0.8544)LDNLDS(0.1456)PR;
RGFSDSGGGPPAK	RGFS[79.9663]DSGGGPPAK	R	Q	63	75	13	2	4S(79.9663)	sp|Q9H307|PININ_HUMAN	Q9H307	PININ_HUMAN	PNN	Pinin			2	2.33446e+06	MS/MS	STY:79.9663@RGFS(0.9476)DS(0.0524)GGGPPAK;
RGNDPLTSSPGR	RGNDPLTSS[79.9663]PGR	R	S	19	30	12	2	9S(79.9663)	sp|P49736|MCM2_HUMAN	P49736	MCM2_HUMAN	MCM2	DNA replication licensing factor MCM2			1	1.2596918E7	MS/MS	STY:79.9663@RGNDPLT(0.0284)S(0.0284)S(0.9431)PGR;
RGNDPLTSSPGR	RGNDPLT[79.9663]SSPGR	R	S	19	30	12	2	7T(79.9663)	sp|P49736|MCM2_HUMAN	P49736	MCM2_HUMAN	MCM2	DNA replication licensing factor MCM2			5	5844143	MS/MS	STY:79.9663@RGNDPLT(0.9317)S(0.0341)S(0.0341)PGR;
RGSSSDEEGGPK	RGS[79.9663]SSDEEGGPK	R	A	694	705	12	2	3S(79.9663)	sp|Q02952|AKA12_HUMAN	Q02952	AKA12_HUMAN	AKAP12	A-kinase anchor protein 12			2	0	MS/MS	STY:79.9663@RGS(0.3333)S(0.3333)S(0.3333)DEEGGPK;
RIDISPSTFR	RIDISPS[79.9663]TFR	R	K	678	687	10	2	7S(79.9663)	sp|Q9Y2W1|TR150_HUMAN	Q9Y2W1	TR150_HUMAN	THRAP3	Thyroid hormone receptor-associated protein 3			1	9681695	MS/MS	STY:79.9663@RIDIS(0.0452)PS(0.4774)T(0.4774)FR;
RIDISPSTLR	RIDISPS[79.9663]TLR	R	K	654	663	10	2	7S(79.9663)	sp|Q9NYF8|BCLF1_HUMAN	Q9NYF8	BCLF1_HUMAN	BCLAF1	Bcl-2-associated transcription factor 1			1	1.1291861E7	MS/MS	STY:79.9663@RIDIS(0.0165)PS(0.4917)T(0.4917)LR;
RIDISPSTFR	RIDIS[79.9663]PSTFR	R	K	678	687	10	2	5S(79.9663)	sp|Q9Y2W1|TR150_HUMAN	Q9Y2W1	TR150_HUMAN	THRAP3	Thyroid hormone receptor-associated protein 3			2	9681695	MS/MS	STY:79.9663@RIDIS(0.4897)PS(0.4897)T(0.0205)FR;
RKPSPEPEGEVGPPK	RKPS[79.9663]PEPEGEVGPPK	K	I	357	371	15	2	4S(79.9663)	sp|Q7Z5L9|I2BP2_HUMAN	Q7Z5L9	I2BP2_HUMAN	IRF2BP2	Interferon regulatory factor 2-binding protein 2			4	2.08448e+06	MS/MS	STY:79.9663@RKPS(1.0000)PEPEGEVGPPK;
RKSPENTEGK	RKS[79.9663]PENTEGK	K	D	4	13	10	3	3S(79.9663)	sp|Q15651|HMGN3_HUMAN	Q15651	HMGN3_HUMAN	HMGN3	High mobility group nucleosome-binding domain-containing protein 3			1	6537300	MS/MS	STY:79.9663@RKS(0.9482)PENT(0.0518)EGK;
RLEQTSVRDPSPEADAPVLGSPEK	RLEQTSVRDPSPEADAPVLGS[79.9663]PEK	R	E	353	376	24	3	21S(79.9663)	sp|O15234|CASC3_HUMAN	O15234	CASC3_HUMAN	CASC3	Protein CASC3			1	1356808	MS/MS	STY:79.9663@RLEQT(0.0190)S(0.0190)VRDPS(0.0197)PEADAPVLGS(0.9423)PEK;
RLSPSASPPR	RLSPS[79.9663]AS[79.9663]PPR	R	R	387	396	10	2	5S(79.9663),7S(79.9663)	sp|Q8IYB3|SRRM1_HUMAN	Q8IYB3	SRRM1_HUMAN	SRRM1	Serine/arginine repetitive matrix protein 1			1	2.07428e+06	MS/MS	STY:79.9663@RLS(0.2533)PS(0.8734)AS(0.8734)PPR;
RLSQPESAEK	RLSQPES[79.9663]AEK	R	H	708	717	10	2	7S(79.9663)	sp|Q9UKV3|ACINU_HUMAN	Q9UKV3	ACINU_HUMAN	ACIN1	Apoptotic chromatin condensation inducer in the nucleus			2	1.6496297E7	MS/MS	STY:79.9663@RLS(0.0711)QPES(0.9289)AEK;
RLSYNTASNK	RLSYNT[79.9663]ASNK	R	T	10	19	10	2	6T(79.9663)	sp|P49207|RL34_HUMAN	P49207	RL34_HUMAN	RPL34	Large ribosomal subunit protein eL34			1	4.02799e+06	MS/MS	STY:79.9663@RLS(0.0206)Y(0.0206)NT(0.9389)AS(0.0199)NK;
RLSQPESAEK	RLS[79.9663]QPESAEK	R	H	708	717	10	2	3S(79.9663)	sp|Q9UKV3|ACINU_HUMAN	Q9UKV3	ACINU_HUMAN	ACIN1	Apoptotic chromatin condensation inducer in the nucleus			2	1.6496297E7	MS/MS	STY:79.9663@RLS(0.8851)QPES(0.1149)AEK;
RNSSEASSGDFLDLK	RNSSEASS[79.9663]GDFLDLK	R	G	85	99	15	2	8S(79.9663)	sp|Q9UK76|JUPI1_HUMAN	Q9UK76	JUPI1_HUMAN	JPT1	Jupiter microtubule associated homolog 1			1	1.4213722E7	MS/MS	STY:79.9663@RNS(0.0177)S(0.0177)EAS(0.0177)S(0.9469)GDFLDLK;
RNSSEASSGDFLDLK	RNSSEAS[79.9663]SGDFLDLK	R	G	85	99	15	2,3	7S(79.9663)	sp|Q9UK76|JUPI1_HUMAN	Q9UK76	JUPI1_HUMAN	JPT1	Jupiter microtubule associated homolog 1			2	5.4435572E7	MS/MS	STY:79.9663@RNS(0.0276)S(0.0276)EAS(0.4724)S(0.4724)GDFLDLK;
RNSSEASSGDFLDLK	RNSS[79.9663]EASSGDFLDLK	R	G	85	99	15	2	4S(79.9663)	sp|Q9UK76|JUPI1_HUMAN	Q9UK76	JUPI1_HUMAN	JPT1	Jupiter microtubule associated homolog 1			1	1.4213722E7	MS/MS	STY:79.9663@RNS(0.0195)S(0.9407)EAS(0.0199)S(0.0199)GDFLDLK;
RNSFSENEK	RNS[79.9663]FSENEK	R	H	827	835	9	2	3S(79.9663)	sp|Q9HCG8|CWC22_HUMAN	Q9HCG8	CWC22_HUMAN	CWC22	Pre-mRNA-splicing factor CWC22 homolog			1	1626791	MS/MS	STY:79.9663@RNS(0.5000)FS(0.5000)ENEK;
RNSSEASSGDFLDLK	RNS[79.9663]SEASSGDFLDLK	R	G	85	99	15	2,3	3S(79.9663)	sp|Q9UK76|JUPI1_HUMAN	Q9UK76	JUPI1_HUMAN	JPT1	Jupiter microtubule associated homolog 1			2	5.2135904E7	MS/MS	STY:79.9663@RNS(0.9346)S(0.0249)EAS(0.0202)S(0.0202)GDFLDLK;
RNSVERPAEPVAGAATPSLVEQQK	RNS[79.9663]VERPAEPVAGAATPSLVEQQK	R	M	1454	1477	24	3	3S(79.9663)	sp|Q9BTC0|DIDO1_HUMAN	Q9BTC0	DIDO1_HUMAN	DIDO1	Death-inducer obliterator 1			3	1.0068395E7	MS/MS	STY:79.9663@RNS(0.9251)VERPAEPVAGAAT(0.0375)PS(0.0375)LVEQQK;
RPDYAPMESSDEEDEEFQFIK	RPDY[79.9663]APMES[79.9663]SDEEDEEFQFIK	K	K	44	64	21	3	4Y(79.9663),9S(79.9663)	sp|P55081|MFAP1_HUMAN	P55081	MFAP1_HUMAN	MFAP1	Microfibrillar-associated protein 1			1	0	MS/MS	STY:79.9663@RPDY(0.6858)APMES(0.6571)S(0.6571)DEEDEEFQFIK;
RPEGPGAQAPSSPR	RPEGPGAQAPSS[79.9663]PR	R	V	504	517	14	2	12S(79.9663)	sp|P40222|TXLNA_HUMAN	P40222	TXLNA_HUMAN	TXLNA	Alpha-taxilin			2	1.189764E7	MS/MS	STY:79.9663@RPEGPGAQAPS(0.0650)S(0.9350)PR;
RPEGPGAQAPSSPR	RPEGPGAQAPS[79.9663]SPR	R	V	504	517	14	2,3	11S(79.9663)	sp|P40222|TXLNA_HUMAN	P40222	TXLNA_HUMAN	TXLNA	Alpha-taxilin			7	1.770793E7	MS/MS	STY:79.9663@RPEGPGAQAPS(0.5000)S(0.5000)PR;
RPMEEDGEEKSPSK	RPMEEDGEEKSPS[79.9663]K	K	K	372	385	14	3	13S(79.9663)	sp|Q12906|ILF3_HUMAN	Q12906	ILF3_HUMAN	ILF3	Interleukin enhancer-binding factor 3			1	3.12723e+06	MS/MS	STY:79.9663@RPMEEDGEEKS(0.1231)PS(0.8769)K;
RPMEEDGEEKSPSK	RPMEEDGEEKS[79.9663]PSK	K	K	372	385	14	2,3	11S(79.9663)	sp|Q12906|ILF3_HUMAN	Q12906	ILF3_HUMAN	ILF3	Interleukin enhancer-binding factor 3			4	2.86011e+06	MS/MS	STY:79.9663@RPMEEDGEEKS(0.8999)PS(0.1001)K;
RPNEDSDEDEEK	RPNEDS[79.9663]DEDEEK	K	G	686	697	12	2	6S(79.9663)	sp|Q12996|CSTF3_HUMAN	Q12996	CSTF3_HUMAN	CSTF3	Cleavage stimulation factor subunit 3			1	0	MS/MS	STY:79.9663@RPNEDS(1.0000)DEDEEK;
RPNTSPDR	RPNT[79.9663]SPDR	K	G	848	855	8	2	4T(79.9663)	sp|Q86VM9|ZCH18_HUMAN	Q86VM9	ZCH18_HUMAN	ZC3H18	Zinc finger CCCH domain-containing protein 18			1	0	MS/MS	STY:79.9663@RPNT(0.5000)S(0.5000)PDR;
RPPSPEPSTK	RPPSPEPS[79.9663]TK	R	V	2099	2108	10	2	8S(79.9663)	sp|Q01082|SPTB2_HUMAN	Q01082	SPTB2_HUMAN	SPTBN1	Spectrin beta chain, non-erythrocytic 1			1	9311630	MS/MS	STY:79.9663@RPPS(0.0246)PEPS(0.4877)T(0.4877)K;
RPPSPEPSTK	RPPS[79.9663]PEPSTK	R	V	2099	2108	10	2,3	4S(79.9663)	sp|Q01082|SPTB2_HUMAN	Q01082	SPTB2_HUMAN	SPTBN1	Spectrin beta chain, non-erythrocytic 1			9	1.2545749E7	MS/MS	STY:79.9663@RPPS(0.9475)PEPS(0.0263)T(0.0263)K;
RPPTPCSDPER	RPPTPC[57.0215]S[79.9663]DPER	K	K	81	91	11	2	6C(57.0215),7S(79.9663)	sp|Q9BW71|HIRP3_HUMAN	Q9BW71	HIRP3_HUMAN	HIRIP3	HIRA-interacting protein 3			1	401500	MS/MS	STY:79.9663@RPPT(0.1381)PCS(0.8619)DPER;
RPTETNPVTSNSDEECNETVK	RPTETNPVTSNSDEEC[57.0215]NET[79.9663]VK	R	E	666	686	21	3	16C(57.0215),19T(79.9663)	sp|P46100|ATRX_HUMAN	P46100	ATRX_HUMAN	ATRX	Transcriptional regulator ATRX			1	2.50766e+06	MS/MS	STY:79.9663@RPT(0.0180)ET(0.0180)NPVT(0.0208)S(0.0208)NS(0.0289)DEECNET(0.8936)VK;
RPTETNPVTSNSDEECNETVK	RPTETNPVTSNS[79.9663]DEEC[57.0215]NETVK	R	E	666	686	21	3	12S(79.9663),16C(57.0215)	sp|P46100|ATRX_HUMAN	P46100	ATRX_HUMAN	ATRX	Transcriptional regulator ATRX			1	2.50766e+06	MS/MS	STY:79.9663@RPT(0.0104)ET(0.0104)NPVT(0.0212)S(0.0099)NS(0.4740)DEECNET(0.4740)VK;
RPTETNPVTSNSDEECNETVK	RPTETNPVT[79.9663]SNSDEEC[57.0215]NETVK	R	E	666	686	21	3	16C(57.0215),9T(79.9663)	sp|P46100|ATRX_HUMAN	P46100	ATRX_HUMAN	ATRX	Transcriptional regulator ATRX			1	2.50766e+06	MS/MS	STY:79.9663@RPT(0.0051)ET(0.0059)NPVT(0.2473)S(0.2473)NS(0.2473)DEECNET(0.2473)VK;
RPTETNPVTSNSDEECNETVK	RPT[79.9663]ETNPVTSNSDEEC[57.0215]NETVK	R	E	666	686	21	3	16C(57.0215),3T(79.9663)	sp|P46100|ATRX_HUMAN	P46100	ATRX_HUMAN	ATRX	Transcriptional regulator ATRX			1	2.50766e+06	MS/MS	STY:79.9663@RPT(0.1667)ET(0.1667)NPVT(0.1667)S(0.1667)NS(0.1667)DEECNET(0.1667)VK;
RQSPLPPQK	RQS[79.9663]PLPPQK	K	K	5	13	9	2	3S(79.9663)	sp|Q01105|SET_HUMAN	Q01105	SET_HUMAN	SET	Protein SET			11	1.8995374E7	MS/MS	STY:79.9663@RQS(1.0000)PLPPQK;
RQVSASELHTSGILGPETLR	RQVSASELHTSGILGPET[79.9663]LR	R	D	2715	2734	20	3	18T(79.9663)	sp|P58107|EPIPL_HUMAN	P58107	EPIPL_HUMAN	EPPK1	Epiplakin			1	7.9779e+06	MS/MS	STY:79.9663@RQVS(0.0151)AS(0.0184)ELHT(0.0184)S(0.0184)GILGPET(0.9298)LR;
RQVSASELHTSGILGPETLR	RQVSASELHTS[79.9663]GILGPETLR	R	D	2715	2734	20	3	11S(79.9663)	sp|P58107|EPIPL_HUMAN	P58107	EPIPL_HUMAN	EPPK1	Epiplakin			1	3.39359e+06	MS/MS	STY:79.9663@RQVS(0.0135)AS(0.0143)ELHT(0.0155)S(0.9214)GILGPET(0.0353)LR;
RQVSASELHTSGILGPETLR	RQVSASELHT[79.9663]SGILGPETLR	R	D	2715	2734	20	3	10T(79.9663)	sp|P58107|EPIPL_HUMAN	P58107	EPIPL_HUMAN	EPPK1	Epiplakin			1	7922411	MS/MS	STY:79.9663@RQVS(0.0209)AS(0.0209)ELHT(0.9298)S(0.0152)GILGPET(0.0132)LR;
RQVSASELHTSGILGPETLR	RQVSAS[79.9663]ELHTSGILGPETLR	R	D	2715	2734	20	3	6S(79.9663)	sp|P58107|EPIPL_HUMAN	P58107	EPIPL_HUMAN	EPPK1	Epiplakin			1	7.9779e+06	MS/MS	STY:79.9663@RQVS(0.0173)AS(0.8768)ELHT(0.0726)S(0.0151)GILGPET(0.0183)LR;
RQVSASELHTSGILGPETLR	RQVS[79.9663]ASELHTSGILGPETLR	R	D	2715	2734	20	3	4S(79.9663)	sp|P58107|EPIPL_HUMAN	P58107	EPIPL_HUMAN	EPPK1	Epiplakin			3	7.9779e+06	MS/MS	STY:79.9663@RQVS(0.4860)AS(0.4860)ELHT(0.0093)S(0.0093)GILGPET(0.0093)LR;
RRSPPADAIPK	RRS[79.9663]PPADAIPK	K	S	9	19	11	3	3S(79.9663)	sp|P18754|RCC1_HUMAN	P18754	RCC1_HUMAN	RCC1	Regulator of chromosome condensation			7	7.26284e+06	MS/MS	STY:79.9663@RRS(1.0000)PPADAIPK;
RSASPDDDLGSSNWEAADLGNEER	RSASPDDDLGS[79.9663]SNWEAADLGNEER	K	K	14	37	24	3	11S(79.9663)	sp|O00193|SMAP_HUMAN	O00193	SMAP_HUMAN	SMAP	Small acidic protein			1	9101796	MS/MS	STY:79.9663@RS(0.2430)AS(0.2430)PDDDLGS(0.2570)S(0.2570)NWEAADLGNEER;
RSEACPCQPDSGSPLPAEEEK	RSEAC[57.0215]PC[57.0215]QPDS[79.9663]GSPLPAEEEK	R	R	492	512	21	3	11S(79.9663),5C(57.0215),7C(57.0215)	sp|Q14160|SCRIB_HUMAN	Q14160	SCRIB_HUMAN	SCRIB	Protein scribble homolog			2	1.10435e+06	MS/MS	STY:79.9663@RS(0.0170)EACPCQPDS(0.4915)GS(0.4915)PLPAEEEK;
RSASPDDDLGSSNWEAADLGNEER	RS[79.9663]ASPDDDLGSSNWEAADLGNEER	K	K	14	37	24	3	2S(79.9663)	sp|O00193|SMAP_HUMAN	O00193	SMAP_HUMAN	SMAP	Small acidic protein			2	9101796	MS/MS	STY:79.9663@RS(0.8973)AS(0.0664)PDDDLGS(0.0181)S(0.0181)NWEAADLGNEER;
RSDSVSASER	RS[79.9663]DSVSASER	R	A	384	393	10	2	2S(79.9663)	sp|O43719|HTSF1_HUMAN	O43719	HTSF1_HUMAN	HTATSF1	17S U2 SnRNP complex component HTATSF1			1	0	MS/MS	STY:79.9663@RS(0.4875)DS(0.4875)VS(0.0129)AS(0.0121)ER;
RTDALTSSPGR	RTDALTS[79.9663]SPGR	R	D	34	44	11	2	7S(79.9663)	sp|P49736|MCM2_HUMAN	P49736	MCM2_HUMAN	MCM2	DNA replication licensing factor MCM2			1	2.0265796E7	MS/MS	STY:79.9663@RT(0.0116)DALT(0.0117)S(0.4884)S(0.4884)PGR;
RTDALTSSPGR	RTDALT[79.9663]SSPGR	R	D	34	44	11	2	6T(79.9663)	sp|P49736|MCM2_HUMAN	P49736	MCM2_HUMAN	MCM2	DNA replication licensing factor MCM2			1	2.0265796E7	MS/MS	STY:79.9663@RT(0.0151)DALT(0.3283)S(0.3283)S(0.3283)PGR;
RTDALTSSPGR	RT[79.9663]DALTSSPGR	R	D	34	44	11	2	2T(79.9663)	sp|P49736|MCM2_HUMAN	P49736	MCM2_HUMAN	MCM2	DNA replication licensing factor MCM2			2	2.0265796E7	MS/MS	STY:79.9663@RT(0.9414)DALT(0.0205)S(0.0192)S(0.0189)PGR;
RVPSPTPAPK	RVPSPT[79.9663]PAPK	K	E	2578	2587	10	2	6T(79.9663)	sp|Q9UQ35|SRRM2_HUMAN	Q9UQ35	SRRM2_HUMAN	SRRM2	Serine/arginine repetitive matrix protein 2			1	2.278307E7	MS/MS	STY:79.9663@RVPS(0.0715)PT(0.9285)PAPK;
RVPSPTPAPK	RVPS[79.9663]PTPAPK	K	E	2578	2587	10	2	4S(79.9663)	sp|Q9UQ35|SRRM2_HUMAN	Q9UQ35	SRRM2_HUMAN	SRRM2	Serine/arginine repetitive matrix protein 2			7	2.4367156E7	MS/MS	STY:79.9663@RVPS(0.9483)PT(0.0517)PAPK;
RVSGPDPKPGSNCSPAQSVLSEVPSVPTNGMAK	RVSGPDPKPGSNC[57.0215]S[79.9663]PAQSVLSEVPSVPTNGMAK	R	N	11	43	33	4	13C(57.0215),14S(79.9663)	sp|P22314|UBA1_HUMAN	P22314	UBA1_HUMAN	UBA1	Ubiquitin-like modifier-activating enzyme 1			1	3177516	MS/MS	STY:79.9663@RVS(0.1515)GPDPKPGS(0.1515)NCS(0.6519)PAQS(0.0090)VLS(0.0090)EVPS(0.0156)VPT(0.0113)NGMAK;
RVSVCAETYNPDEEEEDTDPR	RVSVC[57.0215]AET[79.9663]YNPDEEEEDTDPR	R	V	97	117	21	3	5C(57.0215),8T(79.9663)	sp|P13861|KAP2_HUMAN	P13861	KAP2_HUMAN	PRKAR2A	cAMP-dependent protein kinase type II-alpha regulatory subunit			1	6498762	MS/MS	STY:79.9663@RVS(0.0736)VCAET(0.8607)Y(0.0187)NPDEEEEDT(0.0470)DPR;
RVSGPDPK	RVS[79.9663]GPDPK	R	P	11	18	8	2	3S(79.9663)	sp|P22314|UBA1_HUMAN	P22314	UBA1_HUMAN	UBA1	Ubiquitin-like modifier-activating enzyme 1			1	8357911	MS/MS	STY:79.9663@RVS(1.0000)GPDPK;
RVSVCAETYNPDEEEEDTDPR	RVS[79.9663]VC[57.0215]AETYNPDEEEEDTDPR	R	V	97	117	21	3	3S(79.9663),5C(57.0215)	sp|P13861|KAP2_HUMAN	P13861	KAP2_HUMAN	PRKAR2A	cAMP-dependent protein kinase type II-alpha regulatory subunit			2	6498762	MS/MS	STY:79.9663@RVS(0.9002)VCAET(0.0327)Y(0.0266)NPDEEEEDT(0.0405)DPR;
RVVLGDGVQLPPGDYSTTPGGTLFSTTPGGTR	RVVLGDGVQLPPGDYSTT[79.9663]PGGTLFSTTPGGT[79.9663]R	R	I	20	51	32	3	18T(79.9663),31T(79.9663)	sp|Q13541|4EBP1_HUMAN	Q13541	4EBP1_HUMAN	EIF4EBP1	Eukaryotic translation initiation factor 4E-binding protein 1			1	1.6842038E7	MS/MS	STY:79.9663@RVVLGDGVQLPPGDY(0.0116)S(0.0119)T(0.0119)T(0.5407)PGGT(0.4916)LFS(0.2236)T(0.0118)T(0.0118)PGGT(0.6851)R;
RYSPPIQR	RYS[79.9663]PPIQR	R	R	595	602	8	2	3S(79.9663)	sp|Q8IYB3|SRRM1_HUMAN	Q8IYB3	SRRM1_HUMAN	SRRM1	Serine/arginine repetitive matrix protein 1			3	1.6483669E7	MS/MS	STY:79.9663@RY(0.0509)S(0.9491)PPIQR;
RYSPPIQR	RY[79.9663]SPPIQR	R	R	595	602	8	2	2Y(79.9663)	sp|Q8IYB3|SRRM1_HUMAN	Q8IYB3	SRRM1_HUMAN	SRRM1	Serine/arginine repetitive matrix protein 1			1	1.6483669E7	MS/MS	STY:79.9663@RY(0.5000)S(0.5000)PPIQR;
SAGEEEDGPVLTDEQK	SAGEEEDGPVLT[79.9663]DEQK	R	S	148	163	16	2	12T(79.9663)	sp|Q66PJ3|AR6P4_HUMAN	Q66PJ3	AR6P4_HUMAN	ARL6IP4	ADP-ribosylation factor-like protein 6-interacting protein 4			2	8483984	MS/MS	STY:79.9663@S(0.0983)AGEEEDGPVLT(0.9017)DEQK;
SAMDSPVPASMFAPEPSSPGAAR	SAMDSPVPASMFAPEPS[79.9663]SPGAAR	R	A	8	30	23	3	17S(79.9663)	sp|O00178|GTPB1_HUMAN	O00178	GTPB1_HUMAN	GTPBP1	GTP-binding protein 1			1	0	MS/MS	STY:79.9663@S(0.0108)AMDS(0.0108)PVPAS(0.0097)MFAPEPS(0.4843)S(0.4843)PGAAR;
SASPDDDLGSSNWEAADLGNEER	SASPDDDLGSS[79.9663]NWEAADLGNEER	R	K	15	37	23	3	11S(79.9663)	sp|O00193|SMAP_HUMAN	O00193	SMAP_HUMAN	SMAP	Small acidic protein			1	0	MS/MS	STY:79.9663@S(0.0346)AS(0.0195)PDDDLGS(0.0406)S(0.9052)NWEAADLGNEER;
SCFESSPDPELK	SC[57.0215]FES[79.9663]SPDPELK	R	S	871	882	12	2	2C(57.0215),5S(79.9663)	sp|Q9UQ35|SRRM2_HUMAN	Q9UQ35	SRRM2_HUMAN	SRRM2	Serine/arginine repetitive matrix protein 2			1	3.44028e+06	MS/MS	STY:79.9663@S(0.0161)CFES(0.4919)S(0.4919)PDPELK;
SDAEEDGGTVSQEEEDR	SDAEEDGGTVS[79.9663]QEEEDR	K	K	554	570	17	2	11S(79.9663)	sp|P27824|CALX_HUMAN	P27824	CALX_HUMAN	CANX	Calnexin			1	1.18109e+06	MS/MS	STY:79.9663@S(0.0583)DAEEDGGT(0.0583)VS(0.8835)QEEEDR;
SDAEEDGGTVSQEEEDR	SDAEEDGGT[79.9663]VSQEEEDR	K	K	554	570	17	2	9T(79.9663)	sp|P27824|CALX_HUMAN	P27824	CALX_HUMAN	CANX	Calnexin			1	0	MS/MS	STY:79.9663@S(0.0958)DAEEDGGT(0.4521)VS(0.4521)QEEEDR;
SEEVPAFGVASPPPLTDTPDTTANAEGDLPTTMGGPLPPHLALK	SEEVPAFGVASPPPLTDTPDTTANAEGDLPT[79.9663]TMGGPLPPHLALK	K	A	77	120	44	4	31T(79.9663)	sp|Q08211|DHX9_HUMAN	Q08211	DHX9_HUMAN	DHX9	ATP-dependent RNA helicase A			1	3.05157e+06	MS/MS	STY:79.9663@S(0.0713)EEVPAFGVAS(0.1875)PPPLT(0.1280)DT(0.1280)PDT(0.0412)T(0.0412)ANAEGDLPT(0.2014)T(0.2014)MGGPLPPHLALK;
SESPKEPEQLR	SES[79.9663]PKEPEQLR	K	K	4	14	11	2	3S(79.9663)	sp|P09651|ROA1_HUMAN	P09651	ROA1_HUMAN	HNRNPA1	Heterogeneous nuclear ribonucleoprotein A1	HNRNPA1L3	sp|A0A2R8Y4L2|RA1L3_HUMAN	1	5549671	MS/MS	STY:79.9663@S(0.0524)ES(0.9476)PKEPEQLR;
SETAPAETATPAPVEK	SET[79.9663]APAETATPAPVEK	M	S	2	17	16	2	3T(79.9663)	sp|P16401|H15_HUMAN	P16401	H15_HUMAN	H1-5	Histone H1.5			1	0	MS/MS	STY:79.9663@S(0.0163)ET(0.4854)APAET(0.4854)AT(0.0129)PAPVEK;
SGAQASSTPLSPTR	SGAQASSTPLS[79.9663]PTR	R	I	12	25	14	2	11S(79.9663)	sp|P02545|LMNA_HUMAN	P02545	LMNA_HUMAN	LMNA	Prelamin-A/C			2	1.1345464E7	MS/MS	STY:79.9663@S(0.0457)GAQAS(0.0457)S(0.0101)T(0.0101)PLS(0.8784)PT(0.0100)R;
SGAQASSTPLSPTR	SGAQASST[79.9663]PLSPTR	R	I	12	25	14	2	8T(79.9663)	sp|P02545|LMNA_HUMAN	P02545	LMNA_HUMAN	LMNA	Prelamin-A/C			1	1.1345464E7	MS/MS	STY:79.9663@S(0.0093)GAQAS(0.0054)S(0.0063)T(0.3264)PLS(0.3264)PT(0.3264)R;
SGDETPGSEVPGDK	SGDET[79.9663]PGSEVPGDK	R	A	161	174	14	2	5T(79.9663)	sp|Q1KMD3|HNRL2_HUMAN	Q1KMD3	HNRL2_HUMAN	HNRNPUL2	Heterogeneous nuclear ribonucleoprotein U-like protein 2			1	4.5229e+06	MS/MS	STY:79.9663@S(0.2014)GDET(0.7764)PGS(0.0222)EVPGDK;
SGLTVPTSPK	SGLTVPT[79.9663]SPK	R	G	87	96	10	2	7T(79.9663)	sp|Q53EL6|PDCD4_HUMAN	Q53EL6	PDCD4_HUMAN	PDCD4	Programmed cell death protein 4			1	6.31984e+06	MS/MS	STY:79.9663@S(0.0151)GLT(0.0151)VPT(0.4849)S(0.4849)PK;
SGSSSPDSEITELK	SGSSS[79.9663]PDSEITELK	R	F	571	584	14	2	5S(79.9663)	sp|P17812|PYRG1_HUMAN	P17812	PYRG1_HUMAN	CTPS1	CTP synthase 1			1	0	MS/MS	STY:79.9663@S(0.0115)GS(0.0115)S(0.0115)S(0.9445)PDS(0.0106)EIT(0.0106)ELK;
SGSMDPSGAHPSVR	SGS[79.9663]MDPSGAHPSVR	R	Q	18	31	14	2	3S(79.9663)	sp|Q07666|KHDR1_HUMAN	Q07666	KHDR1_HUMAN	KHDRBS1	KH domain-containing, RNA-binding, signal transduction-associated protein 1			1	2.63633e+06	MS/MS	STY:79.9663@S(0.0252)GS(0.9389)MDPS(0.0180)GAHPS(0.0180)VR;
SHSTEPNLSSFLNDPNPMK	SHS[79.9663]TEPNLSSFLNDPNPMK	R	Y	469	487	19	3	3S(79.9663)	sp|Q9UPQ0|LIMC1_HUMAN	Q9UPQ0	LIMC1_HUMAN	LIMCH1	LIM and calponin homology domains-containing protein 1			1	6577593	MS/MS	STY:79.9663@S(0.0096)HS(0.4827)T(0.4827)EPNLS(0.0127)S(0.0124)FLNDPNPMK;
SLDSDESEDEEDDYQQK	SLDS[79.9663]DES[79.9663]EDEEDDYQQK	K	R	57	73	17	2	4S(79.9663),7S(79.9663)	sp|Q13442|HAP28_HUMAN	Q13442	HAP28_HUMAN	PDAP1	28 kDa heat- and acid-stable phosphoprotein			1	0	MS/MS	STY:79.9663@S(0.1031)LDS(0.9137)DES(0.9137)EDEEDDY(0.0694)QQK;
SLLPLSTSLDHR	SLLPLST[79.9663]S[79.9663]LDHR	R	S	847	858	12	3	7T(79.9663),8S(79.9663)	sp|Q8TEQ6|GEMI5_HUMAN	Q8TEQ6	GEMI5_HUMAN	GEMIN5	Gem-associated protein 5			1	0	MS/MS	STY:79.9663@S(0.0573)LLPLS(0.0502)T(0.9462)S(0.9462)LDHR;
SLLPLSTSLDHR	SLLPLS[79.9663]T[79.9663]SLDHR	R	S	847	858	12	3	6S(79.9663),7T(79.9663)	sp|Q8TEQ6|GEMI5_HUMAN	Q8TEQ6	GEMI5_HUMAN	GEMIN5	Gem-associated protein 5			1	0	MS/MS	STY:79.9663@S(0.0379)LLPLS(0.6933)T(0.6344)S(0.6344)LDHR;
SLPTPAVLLSPTK	SLPT[79.9663]PAVLLSPTK	K	E	632	644	13	2	4T(79.9663)	sp|Q8WX93|PALLD_HUMAN	Q8WX93	PALLD_HUMAN	PALLD	Palladin			1	5002947	MS/MS	STY:79.9663@S(0.0078)LPT(0.3307)PAVLLS(0.3307)PT(0.3307)K;
SLSTSGESLYHVLGLDK	SLSTS[79.9663]GESLYHVLGLDK	R	N	8	24	17	3	5S(79.9663)	sp|Q9H3Z4|DNJC5_HUMAN	Q9H3Z4	DNJC5_HUMAN	DNAJC5	DnaJ homolog subfamily C member 5			1	3.5435e+06	MS/MS	STY:79.9663@S(0.0102)LS(0.0109)T(0.0147)S(0.8934)GES(0.0234)LY(0.0473)HVLGLDK;
SMGTGDTPGLEVPSSPLRK	SMGTGDT[79.9663]PGLEVPSSPLRK	R	A	381	399	19	3	7T(79.9663)	sp|Q86WB0|ZC3C1_HUMAN	Q86WB0	ZC3C1_HUMAN	ZC3HC1	Zinc finger C3HC-type protein 1			1	0	MS/MS	STY:79.9663@S(0.0172)MGT(0.0211)GDT(0.9264)PGLEVPS(0.0177)S(0.0177)PLRK;
SPDLAPTPAPQSTPR	SPDLAPTPAPQS[79.9663]TPR	K	N	506	520	15	2	12S(79.9663)	sp|Q9BY44|EIF2A_HUMAN	Q9BY44	EIF2A_HUMAN	EIF2A	Eukaryotic translation initiation factor 2A			1	4.12114e+06	MS/MS	STY:79.9663@S(0.2870)PDLAPT(0.0336)PAPQS(0.3397)T(0.3397)PR;
SPEPEVLSTQEDLFDQSNK	SPEPEVLST[79.9663]QEDLFDQSNK	K	T	294	312	19	3	9T(79.9663)	sp|Q12888|TP53B_HUMAN	Q12888	TP53B_HUMAN	TP53BP1	TP53-binding protein 1			1	0	MS/MS	STY:79.9663@S(0.4312)PEPEVLS(0.0140)T(0.5280)QEDLFDQS(0.0268)NK;
SPGALETPSAAGSQGNTASQGK	SPGALETPS[79.9663]AAGSQGNTASQGK	K	E	624	645	22	3	9S(79.9663)	sp|Q9Y2D5|PLAK2_HUMAN	Q9Y2D5	PLAK2_HUMAN	PALM2AKAP2	PALM2-AKAP2 fusion protein			1	1.06775e+06	MS/MS	STY:79.9663@S(0.0073)PGALET(0.0077)PS(0.5044)AAGS(0.0641)QGNT(0.2082)AS(0.2082)QGK;
SPGALETPSAAGSQGNTASQGK	SPGALET[79.9663]PSAAGSQGNTASQGK	K	E	624	645	22	3	7T(79.9663)	sp|Q9Y2D5|PLAK2_HUMAN	Q9Y2D5	PLAK2_HUMAN	PALM2AKAP2	PALM2-AKAP2 fusion protein			1	0	MS/MS	STY:79.9663@S(0.0413)PGALET(0.5865)PS(0.0132)AAGS(0.0082)QGNT(0.1754)AS(0.1754)QGK;
SPGAPGPLTLK	SPGAPGPLT[79.9663]LK	R	E	344	354	11	2	9T(79.9663)	sp|Q15942|ZYX_HUMAN	Q15942	ZYX_HUMAN	ZYX	Zyxin			1	3219933	MS/MS	STY:79.9663@S(0.1429)PGAPGPLT(0.8571)LK;
SPGSGSQSSGWHEVEPGMPSPTTLK	SPGSGS[79.9663]QSSGWHEVEPGMPSPTTLK	R	K	300	324	25	3	6S(79.9663)	sp|Q12857|NFIA_HUMAN	Q12857	NFIA_HUMAN	NFIA	Nuclear factor 1 A-type			1	4353964	MS/MS	STY:79.9663@S(0.0056)PGS(0.0056)GS(0.3250)QS(0.3250)S(0.3250)GWHEVEPGMPS(0.0046)PT(0.0046)T(0.0046)LK;
SPGSGSQSSGWHEVEPGMPSPTTLK	SPGS[79.9663]GSQSSGWHEVEPGMPSPTTLK	R	K	300	324	25	3	4S(79.9663)	sp|Q12857|NFIA_HUMAN	Q12857	NFIA_HUMAN	NFIA	Nuclear factor 1 A-type			1	4353964	MS/MS	STY:79.9663@S(0.0126)PGS(0.4056)GS(0.4056)QS(0.0733)S(0.0733)GWHEVEPGMPS(0.0098)PT(0.0098)T(0.0098)LK;
SPQPPVEEEDEHFDDTVVCLDTYNCDLHFK	SPQPPVEEEDEHFDDT[79.9663]VVC[57.0215]LDTYNC[57.0215]DLHFK	K	I	271	300	30	4	16T(79.9663),19C(57.0215),25C(57.0215)	sp|Q00839|HNRPU_HUMAN	Q00839	HNRPU_HUMAN	HNRNPU	Heterogeneous nuclear ribonucleoprotein U			1	5583595	MS/MS	STY:79.9663@S(0.0544)PQPPVEEEDEHFDDT(0.4671)VVCLDT(0.4671)Y(0.0114)NCDLHFK;
SPSGGAAGPLLTPSQSLDGSR	SPSGGAAGPLLTPSQSLDGS[79.9663]R	R	R	185	205	21	3	20S(79.9663)	sp|Q96CX2|KCD12_HUMAN	Q96CX2	KCD12_HUMAN	KCTD12	BTB/POZ domain-containing protein KCTD12			1	1.47743e+06	MS/MS	STY:79.9663@S(0.1598)PS(0.0644)GGAAGPLLT(0.2416)PS(0.2416)QS(0.0051)LDGS(0.2874)R;
SPTMEQAVQTASAHLPAPAAVGR	SPTM[15.9949]EQAVQTAS[79.9663]AHLPAPAAVGR	K	R	192	214	23	3	12S(79.9663),4M(15.9949)	sp|Q8ND56|LS14A_HUMAN	Q8ND56	LS14A_HUMAN	LSM14A	Protein LSM14 homolog A			1	5031769	MS/MS	STY:79.9663@S(0.3261)PT(0.3261)MEQAVQT(0.0135)AS(0.3342)AHLPAPAAVGR;M:15.9949@SPTM(1.0000)EQAVQTASAHLPAPAAVGR;
SPTMEQAVQTASAHLPAPAAVGR	SPTM[15.9949]EQAVQT[79.9663]ASAHLPAPAAVGR	K	R	192	214	23	3	10T(79.9663),4M(15.9949)	sp|Q8ND56|LS14A_HUMAN	Q8ND56	LS14A_HUMAN	LSM14A	Protein LSM14 homolog A			1	5379576	MS/MS	STY:79.9663@S(0.0399)PT(0.0399)MEQAVQT(0.9017)AS(0.0186)AHLPAPAAVGR;M:15.9949@SPTM(1.0000)EQAVQTASAHLPAPAAVGR;
SPTGPSNSFLANMGGTVAHK	SPT[79.9663]GPSNSFLANMGGTVAHK	R	I	222	241	20	3	3T(79.9663)	sp|Q96I25|SPF45_HUMAN	Q96I25	SPF45_HUMAN	RBM17	Splicing factor 45			1	4.20017e+06	MS/MS	STY:79.9663@S(0.0159)PT(0.9383)GPS(0.0134)NS(0.0133)FLANMGGT(0.0192)VAHK;
SPVSTRPLPSASQK	SPVST[79.9663]RPLPSASQK	R	A	216	229	14	2	5T(79.9663)	sp|Q8ND56|LS14A_HUMAN	Q8ND56	LS14A_HUMAN	LSM14A	Protein LSM14 homolog A			1	5.16915e+06	MS/MS	STY:79.9663@S(0.0113)PVS(0.0113)T(0.3258)RPLPS(0.3258)AS(0.3258)QK;
SQEPIPDDQKVSDDDK	SQEPIPDDQKVS[79.9663]DDDK	K	E	415	430	16	2	12S(79.9663)	sp|Q86UE4|LYRIC_HUMAN	Q86UE4	LYRIC_HUMAN	MTDH	Protein LYRIC			1	0	MS/MS	STY:79.9663@S(0.0512)QEPIPDDQKVS(0.9488)DDDK;
SQSLPNSLDYTQTSDPGR	SQSLPNSLDYTQTS[79.9663]DPGR	R	H	44	61	18	2	14S(79.9663)	sp|Q96TC7|RMD3_HUMAN	Q96TC7	RMD3_HUMAN	RMDN3	Regulator of microtubule dynamics protein 3			1	3.24505e+06	MS/MS	STY:79.9663@S(0.1347)QS(0.1347)LPNS(0.0082)LDY(0.0082)T(0.0082)QT(0.0084)S(0.6977)DPGR;
SQSSDTEQQSPTSGGGK	SQS[79.9663]SDTEQQSPTSGGGK	R	V	495	511	17	2	3S(79.9663)	sp|P23588|IF4B_HUMAN	P23588	IF4B_HUMAN	EIF4B	Eukaryotic translation initiation factor 4B			1	1.23034e+06	MS/MS	STY:79.9663@S(0.0080)QS(0.6605)S(0.0131)DT(0.0131)EQQS(0.0349)PT(0.1352)S(0.1352)GGGK;
SRSGEGEVSGLMR	SRS[79.9663]GEGEVSGLMR	R	K	471	483	13	2	3S(79.9663)	sp|Q13263|TIF1B_HUMAN	Q13263	TIF1B_HUMAN	TRIM28	Transcription intermediary factor 1-beta			1	4485913	MS/MS	STY:79.9663@S(0.0307)RS(0.8508)GEGEVS(0.1185)GLMR;
SSMSGLHLVK	SSMS[79.9663]GLHLVK	R	Q	77	86	10	2	4S(79.9663)	sp|Q13085|ACACA_HUMAN	Q13085	ACACA_HUMAN	ACACA	Acetyl-CoA carboxylase 1			1	4669060	MS/MS	STY:79.9663@S(0.0261)S(0.0261)MS(0.9478)GLHLVK;
SSSPAPADIAQTVQEDLR	SSSPAPADIAQT[79.9663]VQEDLR	K	T	230	247	18	2	12T(79.9663)	sp|Q13283|G3BP1_HUMAN	Q13283	G3BP1_HUMAN	G3BP1	Ras GTPase-activating protein-binding protein 1			1	3.8664732E7	MS/MS	STY:79.9663@S(0.0254)S(0.0254)S(0.0254)PAPADIAQT(0.9238)VQEDLR;
SSTPPGESYFGVSSLQLK	SST[79.9663]PPGESYFGVSSLQLK	K	G	1041	1058	18	2	3T(79.9663)	sp|Q9UQ35|SRRM2_HUMAN	Q9UQ35	SRRM2_HUMAN	SRRM2	Serine/arginine repetitive matrix protein 2			1	0	MS/MS	STY:79.9663@S(0.0035)S(0.0035)T(0.2593)PPGES(0.1961)Y(0.1961)FGVS(0.1707)S(0.1707)LQLK;
STAQQELDGKPASPTPVIVASHTANK	STAQQELDGKPASPTPVIVASHT[79.9663]ANK	R	E	847	872	26	3	23T(79.9663)	sp|P35606|COPB2_HUMAN	P35606	COPB2_HUMAN	COPB2	Coatomer subunit beta'			1	6.10355e+06	MS/MS	STY:79.9663@S(0.1360)T(0.1360)AQQELDGKPAS(0.2413)PT(0.0528)PVIVAS(0.0059)HT(0.4279)ANK;
STAQQELDGKPASPTPVIVASHTANK	STAQQELDGKPASPTPVIVAS[79.9663]HTANK	R	E	847	872	26	4	21S(79.9663)	sp|P35606|COPB2_HUMAN	P35606	COPB2_HUMAN	COPB2	Coatomer subunit beta'			1	1.41611E7	MS/MS	STY:79.9663@S(0.0112)T(0.0112)AQQELDGKPAS(0.0133)PT(0.0096)PVIVAS(0.4773)HT(0.4773)ANK;
STAQQELDGKPASPTPVIVASHTANK	STAQQELDGKPAS[79.9663]PTPVIVASHTANK	R	E	847	872	26	3	13S(79.9663)	sp|P35606|COPB2_HUMAN	P35606	COPB2_HUMAN	COPB2	Coatomer subunit beta'			2	6.10355e+06	MS/MS	STY:79.9663@S(0.0110)T(0.0110)AQQELDGKPAS(0.9275)PT(0.0109)PVIVAS(0.0206)HT(0.0191)ANK;
STTPPPAEPVSLPQEPPK	STTPPPAEPVS[79.9663]LPQEPPK	K	A	225	242	18	2	11S(79.9663)	sp|Q9UN86|G3BP2_HUMAN	Q9UN86	G3BP2_HUMAN	G3BP2	Ras GTPase-activating protein-binding protein 2			1	5.71667e+06	MS/MS	STY:79.9663@S(0.1060)T(0.1060)T(0.1060)PPPAEPVS(0.6820)LPQEPPK;
SYDVPPPPMEPDHPFYSNISK	SYDVPPPPMEPDHPFY[79.9663]SNISK	R	D	118	138	21	3	16Y(79.9663)	sp|P18669|PGAM1_HUMAN	P18669	PGAM1_HUMAN	PGAM1	Phosphoglycerate mutase 1	PGAM4	sp|Q8N0Y7|PGAM4_HUMAN	1	2.39928e+06	MS/MS	STY:79.9663@S(0.0096)Y(0.0096)DVPPPPMEPDHPFY(0.3935)S(0.3935)NIS(0.1937)K;
SAEPSANTTLVSETEEEGSVPAFGAAAK	S[79.9663]AEPSANTTLVSETEEEGSVPAFGAAAK	K	P	160	187	28	3	1S(79.9663)	sp|Q13428|TCOF_HUMAN	Q13428	TCOF_HUMAN	TCOF1	Treacle protein			1	6701448	MS/MS	STY:79.9663@S(0.3192)AEPS(0.3192)ANT(0.3192)T(0.0164)LVS(0.0090)ET(0.0090)EEEGS(0.0080)VPAFGAAAK;
SASASHQADIK	S[79.9663]ASASHQADIK	R	E	97	107	11	2	1S(79.9663)	sp|Q14739|LBR_HUMAN	Q14739	LBR_HUMAN	LBR	Delta(14)-sterol reductase LBR			1	8222567	MS/MS	STY:79.9663@S(0.4919)AS(0.4919)AS(0.0163)HQADIK;
SASSDTSEELNSQDSPPK	S[79.9663]ASSDTSEELNSQDSPPK	R	Q	288	305	18	2	1S(79.9663)	sp|O14745|NHRF1_HUMAN	O14745	NHRF1_HUMAN	NHERF1	Na(+)/H(+) exchange regulatory cofactor NHE-RF1			2	2.65226e+06	MS/MS	STY:79.9663@S(0.3267)AS(0.3267)S(0.3267)DT(0.0050)S(0.0050)EELNS(0.0048)QDS(0.0050)PPK;
SDAEEDGGTVSQEEEDR	S[79.9663]DAEEDGGTVSQEEEDR	K	K	554	570	17	2	1S(79.9663)	sp|P27824|CALX_HUMAN	P27824	CALX_HUMAN	CANX	Calnexin			2	1246495	MS/MS	STY:79.9663@S(0.9241)DAEEDGGT(0.0379)VS(0.0379)QEEEDR;
SESPKEPEQLR	S[79.9663]ESPKEPEQLR	K	K	4	14	11	2	1S(79.9663)	sp|P09651|ROA1_HUMAN	P09651	ROA1_HUMAN	HNRNPA1	Heterogeneous nuclear ribonucleoprotein A1	HNRNPA1L3	sp|A0A2R8Y4L2|RA1L3_HUMAN	8	1.4666028E7	MS/MS	STY:79.9663@S(0.5000)ES(0.5000)PKEPEQLR;
SESPKEPEQLRK	S[79.9663]ESPKEPEQLRK	K	L	4	15	12	3	1S(79.9663)	sp|P09651|ROA1_HUMAN	P09651	ROA1_HUMAN	HNRNPA1	Heterogeneous nuclear ribonucleoprotein A1	HNRNPA1L3	sp|A0A2R8Y4L2|RA1L3_HUMAN	2	3399550	MS/MS	STY:79.9663@S(0.5000)ES(0.5000)PKEPEQLRK;
SETAPAAPAAAPPAEK	S[79.9663]ETAPAAPAAAPPAEK	M	A	2	17	16	2	1S(79.9663)	sp|P16403|H12_HUMAN	P16403	H12_HUMAN	H1-2	Histone H1.2			1	4.83562e+06	MS/MS	STY:79.9663@S(0.5000)ET(0.5000)APAAPAAAPPAEK;
SETAPAAPAAPAPAEK	S[79.9663]ETAPAAPAAPAPAEK	M	T	2	17	16	2	1S(79.9663)	sp|P10412|H14_HUMAN	P10412	H14_HUMAN	H1-4	Histone H1.4			1	4710313	MS/MS	STY:79.9663@S(0.5000)ET(0.5000)APAAPAAPAPAEK;
SGAQASSTPLSPTR	S[79.9663]GAQASSTPLSPTR	R	I	12	25	14	2	1S(79.9663)	sp|P02545|LMNA_HUMAN	P02545	LMNA_HUMAN	LMNA	Prelamin-A/C			1	1.1345464E7	MS/MS	STY:79.9663@S(0.2915)GAQAS(0.0048)S(0.1759)T(0.1759)PLS(0.1759)PT(0.1759)R;
SGDETPGSEVPGDK	S[79.9663]GDETPGSEVPGDK	R	A	161	174	14	2	1S(79.9663)	sp|Q1KMD3|HNRL2_HUMAN	Q1KMD3	HNRL2_HUMAN	HNRNPUL2	Heterogeneous nuclear ribonucleoprotein U-like protein 2			1	4.5229e+06	MS/MS	STY:79.9663@S(0.8977)GDET(0.0631)PGS(0.0392)EVPGDK;
SGEGEVSGLMR	S[79.9663]GEGEVSGLM[15.9949]R	R	K	473	483	11	2	10M(15.9949),1S(79.9663)	sp|Q13263|TIF1B_HUMAN	Q13263	TIF1B_HUMAN	TRIM28	Transcription intermediary factor 1-beta			1	0	MS/MS	STY:79.9663@S(0.9458)GEGEVS(0.0542)GLMR;M:15.9949@SGEGEVSGLM(1.0000)R;
SGLTVPTSPK	S[79.9663]GLTVPTSPK	R	G	87	96	10	2	1S(79.9663)	sp|Q53EL6|PDCD4_HUMAN	Q53EL6	PDCD4_HUMAN	PDCD4	Programmed cell death protein 4			2	7.9716e+06	MS/MS	STY:79.9663@S(0.3305)GLT(0.3305)VPT(0.3305)S(0.0086)PK;
SGSMDPSGAHPSVR	S[79.9663]GSMDPSGAHPSVR	R	Q	18	31	14	2	1S(79.9663)	sp|Q07666|KHDR1_HUMAN	Q07666	KHDR1_HUMAN	KHDRBS1	KH domain-containing, RNA-binding, signal transduction-associated protein 1			4	8421966	MS/MS	STY:79.9663@S(0.9248)GS(0.0354)MDPS(0.0203)GAHPS(0.0195)VR;
SHSTEPNLSSFLNDPNPMK	S[79.9663]HSTEPNLSSFLNDPNPMK	R	Y	469	487	19	3	1S(79.9663)	sp|Q9UPQ0|LIMC1_HUMAN	Q9UPQ0	LIMC1_HUMAN	LIMCH1	LIM and calponin homology domains-containing protein 1			1	6577593	MS/MS	STY:79.9663@S(0.3261)HS(0.3261)T(0.3261)EPNLS(0.0108)S(0.0108)FLNDPNPMK;
SINEENGEVSEDQSQNK	S[79.9663]INEENGEVSEDQSQNK	K	H	23	39	17	2	1S(79.9663)	sp|Q13523|PRP4K_HUMAN	Q13523	PRP4K_HUMAN	PRP4K	Serine/threonine-protein kinase PRP4 homolog			1	1666678	MS/MS	STY:79.9663@S(0.4440)INEENGEVS(0.1856)EDQS(0.3704)QNK;
SISADDDLQESSR	S[79.9663]ISADDDLQESSR	R	R	113	125	13	2	1S(79.9663)	sp|P18615|NELFE_HUMAN	P18615	NELFE_HUMAN	NELFE	Negative elongation factor E			1	0	MS/MS	STY:79.9663@S(0.8883)IS(0.0179)ADDDLQES(0.0478)S(0.0460)R;
SKSPLPPEEEAK	S[79.9663]KSPLPPEEEAK	R	D	226	237	12	2	1S(79.9663)	sp|Q1KMD3|HNRL2_HUMAN	Q1KMD3	HNRL2_HUMAN	HNRNPUL2	Heterogeneous nuclear ribonucleoprotein U-like protein 2			3	1534698	MS/MS	STY:79.9663@S(0.9389)KS(0.0611)PLPPEEEAK;
SLENETLNK	S[79.9663]LENETLNK	K	E	445	453	9	2	1S(79.9663)	sp|P23588|IF4B_HUMAN	P23588	IF4B_HUMAN	EIF4B	Eukaryotic translation initiation factor 4B			2	2.2225122E7	MS/MS	STY:79.9663@S(0.9154)LENET(0.0846)LNK;
SLLDASEEAIK	S[79.9663]LLDASEEAIK	K	K	721	731	11	2	1S(79.9663)	sp|P18206|VINC_HUMAN	P18206	VINC_HUMAN	VCL	Vinculin			1	1.45236e+06	MS/MS	STY:79.9663@S(0.8847)LLDAS(0.1153)EEAIK;
SLSDSESDDSK	S[79.9663]LSDSESDDSK	K	S	93	103	11	2	1S(79.9663)	sp|Q13185|CBX3_HUMAN	Q13185	CBX3_HUMAN	CBX3	Chromobox protein homolog 3			2	7.43033e+06	MS/MS	STY:79.9663@S(0.4815)LS(0.4815)DS(0.0122)ES(0.0124)DDS(0.0124)K;
SLSEQPVMDTATATEQAK	S[79.9663]LSEQPVMDTATATEQAK	R	Q	49	66	18	2	1S(79.9663)	sp|P18615|NELFE_HUMAN	P18615	NELFE_HUMAN	NELFE	Negative elongation factor E			1	0	MS/MS	STY:79.9663@S(0.9057)LS(0.0160)EQPVMDT(0.0282)AT(0.0251)AT(0.0251)EQAK;
SLSPGGAALGYR	S[79.9663]LSPGGAALGYR	R	D	292	303	12	2	1S(79.9663)	sp|Q96T37|RBM15_HUMAN	Q96T37	RBM15_HUMAN	RBM15	RNA-binding protein 15			1	0	MS/MS	STY:79.9663@S(0.4905)LS(0.4905)PGGAALGY(0.0191)R;
SLSTSGESLYHVLGLDK	S[79.9663]LSTSGESLYHVLGLDK	R	N	8	24	17	3	1S(79.9663)	sp|Q9H3Z4|DNJC5_HUMAN	Q9H3Z4	DNJC5_HUMAN	DNAJC5	DnaJ homolog subfamily C member 5			1	3.5435e+06	MS/MS	STY:79.9663@S(0.2478)LS(0.2478)T(0.2478)S(0.2478)GES(0.0044)LY(0.0044)HVLGLDK;
SLTNSHLEK	S[79.9663]LTNSHLEK	R	K	52	60	9	2	1S(79.9663)	sp|Q9H2H9|S38A1_HUMAN	Q9H2H9	S38A1_HUMAN	SLC38A1	Sodium-coupled neutral amino acid symporter 1			1	2.08361e+06	MS/MS	STY:79.9663@S(0.4919)LT(0.4919)NS(0.0162)HLEK;
SNQIPTEVR	S[79.9663]NQIPTEVR	K	S	151	159	9	2	1S(79.9663)	sp|Q9BWH2|FUND2_HUMAN	Q9BWH2	FUND2_HUMAN	FUNDC2	FUN14 domain-containing protein 2			1	0	MS/MS	STY:79.9663@S(0.9496)NQIPT(0.0504)EVR;
SNSAPLIHGLSDTSPVFQAEAPSAR	S[79.9663]NSAPLIHGLSDTSPVFQAEAPSAR	R	R	35	59	25	3	1S(79.9663)	sp|Q96E09|PBIR1_HUMAN	Q96E09	PBIR1_HUMAN	PABIR1	PPP2R1A-PPP2R2A-interacting phosphatase regulator 1			1	0	MS/MS	STY:79.9663@S(0.4825)NS(0.4825)APLIHGLS(0.0092)DT(0.0092)S(0.0083)PVFQAEAPS(0.0083)AR;
SNSFSDER	S[79.9663]NSFSDER	R	E	5780	5787	8	2	1S(79.9663)	sp|Q09666|AHNK_HUMAN	Q09666	AHNK_HUMAN	AHNAK	Neuroblast differentiation-associated protein AHNAK			1	3748214	MS/MS	STY:79.9663@S(0.4920)NS(0.4920)FS(0.0160)DER;
SPEPEATLTFPFLDK	S[79.9663]PEPEATLTFPFLDK	K	M	718	732	15	2,3	1S(79.9663)	sp|Q9UPQ0|LIMC1_HUMAN	Q9UPQ0	LIMC1_HUMAN	LIMCH1	LIM and calponin homology domains-containing protein 1			2	909348	MS/MS	STY:79.9663@S(0.4874)PEPEAT(0.4874)LT(0.0252)FPFLDK;
SPGHMVILDQTK	S[79.9663]PGHMVILDQTK	K	G	553	564	12	2	1S(79.9663)	sp|Q9NWH9|SLTM_HUMAN	Q9NWH9	SLTM_HUMAN	SLTM	SAFB-like transcription modulator			1	1.7160618E7	MS/MS	STY:79.9663@S(0.9496)PGHMVILDQT(0.0504)K;
SPGSGSQSSGWHEVEPGMPSPTTLK	S[79.9663]PGSGSQSSGWHEVEPGMPSPTTLK	R	K	300	324	25	3	1S(79.9663)	sp|Q12857|NFIA_HUMAN	Q12857	NFIA_HUMAN	NFIA	Nuclear factor 1 A-type			1	3.92151e+06	MS/MS	STY:79.9663@S(0.2747)PGS(0.2747)GS(0.2747)QS(0.0040)S(0.0040)GWHEVEPGMPS(0.0559)PT(0.0559)T(0.0559)LK;
SPIINESR	S[79.9663]PIINESR	K	S	277	284	8	2	1S(79.9663)	sp|Q13523|PRP4K_HUMAN	Q13523	PRP4K_HUMAN	PRP4K	Serine/threonine-protein kinase PRP4 homolog			1	0	MS/MS	STY:79.9663@S(0.8333)PIINES(0.1667)R;
SPISINVK	S[79.9663]PISINVK	K	T	352	359	8	2	1S(79.9663)	sp|Q9UK58|CCNL1_HUMAN	Q9UK58	CCNL1_HUMAN	CCNL1	Cyclin-L1			2	2.57543e+06	MS/MS	STY:79.9663@S(0.9496)PIS(0.0504)INVK;
SPLQSVVVR	S[79.9663]PLQSVVVR	K	R	253	261	9	2	1S(79.9663)	sp|Q9Y2W1|TR150_HUMAN	Q9Y2W1	TR150_HUMAN	THRAP3	Thyroid hormone receptor-associated protein 3			1	9678657	MS/MS	STY:79.9663@S(0.9456)PLQS(0.0544)VVVR;
SPPLPAVIR	S[79.9663]PPLPAVIR	R	N	615	623	9	2	1S(79.9663)	sp|Q9Y6X9|MORC2_HUMAN	Q9Y6X9	MORC2_HUMAN	MORC2	ATPase MORC2			1	1.85892e+06	MS/MS	STY:79.9663@S(1.0000)PPLPAVIR;
SPPPESVDTPTSTK	S[79.9663]PPPESVDTPTSTK	K	Q	1131	1144	14	2	1S(79.9663)	sp|P46013|KI67_HUMAN	P46013	KI67_HUMAN	MKI67	Proliferation marker protein Ki-67			1	2125363	MS/MS	STY:79.9663@S(0.6619)PPPES(0.1218)VDT(0.0499)PT(0.0499)S(0.0499)T(0.0667)K;
SPQPPVEEEDEHFDDTVVCLDTYNCDLHFK	S[79.9663]PQPPVEEEDEHFDDTVVC[57.0215]LDTYNC[57.0215]DLHFK	K	I	271	300	30	4	19C(57.0215),1S(79.9663),25C(57.0215)	sp|Q00839|HNRPU_HUMAN	Q00839	HNRPU_HUMAN	HNRNPU	Heterogeneous nuclear ribonucleoprotein U			1	5583595	MS/MS	STY:79.9663@S(0.9131)PQPPVEEEDEHFDDT(0.0310)VVCLDT(0.0230)Y(0.0329)NCDLHFK;
SPSGGAAGPLLTPSQSLDGSR	S[79.9663]PSGGAAGPLLTPSQSLDGSR	R	R	185	205	21	2	1S(79.9663)	sp|Q96CX2|KCD12_HUMAN	Q96CX2	KCD12_HUMAN	KCTD12	BTB/POZ domain-containing protein KCTD12			1	0	MS/MS	STY:79.9663@S(0.4796)PS(0.4796)GGAAGPLLT(0.0095)PS(0.0105)QS(0.0105)LDGS(0.0103)R;
SPSGHPHVR	S[79.9663]PSGHPHVR	R	R	1104	1112	9	2	1S(79.9663)	sp|Q8WX93|PALLD_HUMAN	Q8WX93	PALLD_HUMAN	PALLD	Palladin			2	564035	MS/MS	STY:79.9663@S(0.5000)PS(0.5000)GHPHVR;
SPSPPDGSPAATPEIR	S[79.9663]PSPPDGSPAATPEIR	K	V	296	311	16	2	1S(79.9663)	sp|O00499|BIN1_HUMAN	O00499	BIN1_HUMAN	BIN1	Myc box-dependent-interacting protein 1			3	3480738	MS/MS	STY:79.9663@S(0.4885)PS(0.4885)PPDGS(0.0115)PAAT(0.0115)PEIR;
SPTGPSNSFLANMGGTVAHK	S[79.9663]PTGPSNSFLANMGGTVAHK	R	I	222	241	20	3	1S(79.9663)	sp|Q96I25|SPF45_HUMAN	Q96I25	SPF45_HUMAN	RBM17	Splicing factor 45			1	4.20017e+06	MS/MS	STY:79.9663@S(0.3710)PT(0.3710)GPS(0.1420)NS(0.0826)FLANMGGT(0.0333)VAHK;
SPTMEQAVQTASAHLPAPAAVGR	S[79.9663]PTMEQAVQTASAHLPAPAAVGR	K	R	192	214	23	3	1S(79.9663)	sp|Q8ND56|LS14A_HUMAN	Q8ND56	LS14A_HUMAN	LSM14A	Protein LSM14 homolog A			6	2.3247884E7	MS/MS	STY:79.9663@S(0.9444)PT(0.0182)MEQAVQT(0.0187)AS(0.0187)AHLPAPAAVGR;
SPTMEQAVQTASAHLPAPAAVGR	S[79.9663]PTM[15.9949]EQAVQTASAHLPAPAAVGR	K	R	192	214	23	3	1S(79.9663),4M(15.9949)	sp|Q8ND56|LS14A_HUMAN	Q8ND56	LS14A_HUMAN	LSM14A	Protein LSM14 homolog A			2	5379576	MS/MS	STY:79.9663@S(0.4877)PT(0.4877)MEQAVQT(0.0125)AS(0.0121)AHLPAPAAVGR;M:15.9949@SPTM(1.0000)EQAVQTASAHLPAPAAVGR;
SPVPSAFSDQSR	S[79.9663]PVPSAFSDQSR	R	C	2449	2460	12	2	1S(79.9663)	sp|Q9UQ35|SRRM2_HUMAN	Q9UQ35	SRRM2_HUMAN	SRRM2	Serine/arginine repetitive matrix protein 2			1	5003437	MS/MS	STY:79.9663@S(0.9432)PVPS(0.0192)AFS(0.0188)DQS(0.0188)R;
SPVREPIDNLTPEER	S[79.9663]PVREPIDNLTPEER	K	D	136	150	15	2	1S(79.9663)	sp|Q14498|RBM39_HUMAN	Q14498	RBM39_HUMAN	RBM39	RNA-binding protein 39			1	6723147	MS/MS	STY:79.9663@S(0.6504)PVREPIDNLT(0.3496)PEER;
SPVSTRPLPSASQK	S[79.9663]PVSTRPLPSASQK	R	A	216	229	14	2	1S(79.9663)	sp|Q8ND56|LS14A_HUMAN	Q8ND56	LS14A_HUMAN	LSM14A	Protein LSM14 homolog A			4	5.16915e+06	MS/MS	STY:79.9663@S(0.9185)PVS(0.0130)T(0.0130)RPLPS(0.0278)AS(0.0278)QK;
SQEADVQDWEFR	S[79.9663]QEADVQDWEFR	R	K	836	847	12	2	1S(79.9663)	sp|Q9C0C2|TB182_HUMAN	Q9C0C2	TB182_HUMAN	TNKS1BP1	182 kDa tankyrase-1-binding protein			4	6291123	MS/MS	STY:79.9663@S(1.0000)QEADVQDWEFR;
SQEMVHLVNK	S[79.9663]QEMVHLVNK	K	E	706	715	10	2	1S(79.9663)	sp|P16070|CD44_HUMAN	P16070	CD44_HUMAN	CD44	CD44 antigen			2	4225126	MS/MS	STY:79.9663@S(1.0000)QEMVHLVNK;
SQSSDTEQQSPTSGGGK	S[79.9663]QSSDTEQQSPTSGGGK	R	V	495	511	17	2	1S(79.9663)	sp|P23588|IF4B_HUMAN	P23588	IF4B_HUMAN	EIF4B	Eukaryotic translation initiation factor 4B			1	784587	MS/MS	STY:79.9663@S(0.2026)QS(0.2026)S(0.2026)DT(0.1248)EQQS(0.1248)PT(0.1248)S(0.0180)GGGK;
SREDLSAQPVQTK	S[79.9663]REDLSAQPVQTK	K	F	617	629	13	2	1S(79.9663)	sp|Q07157|ZO1_HUMAN	Q07157	ZO1_HUMAN	TJP1	Tight junction protein 1			1	1.67897e+06	MS/MS	STY:79.9663@S(0.4555)REDLS(0.4555)AQPVQT(0.0889)K;
SRSGEGEVSGLMR	S[79.9663]RSGEGEVSGLMR	R	K	471	483	13	2	1S(79.9663)	sp|Q13263|TIF1B_HUMAN	Q13263	TIF1B_HUMAN	TRIM28	Transcription intermediary factor 1-beta			1	4485913	MS/MS	STY:79.9663@S(0.5804)RS(0.0182)GEGEVS(0.4014)GLMR;
SSMSGLHLVK	S[79.9663]SMSGLHLVK	R	Q	77	86	10	2	1S(79.9663)	sp|Q13085|ACACA_HUMAN	Q13085	ACACA_HUMAN	ACACA	Acetyl-CoA carboxylase 1			1	4669060	MS/MS	STY:79.9663@S(0.4874)S(0.4874)MS(0.0252)GLHLVK;
SSSPAPADIAQTVQEDLR	S[79.9663]SSPAPADIAQTVQEDLR	K	T	230	247	18	2	1S(79.9663)	sp|Q13283|G3BP1_HUMAN	Q13283	G3BP1_HUMAN	G3BP1	Ras GTPase-activating protein-binding protein 1			1	3.8664732E7	MS/MS	STY:79.9663@S(0.9210)S(0.0241)S(0.0241)PAPADIAQT(0.0308)VQEDLR;
STAQQELDGKPASPTPVIVASHTANK	S[79.9663]TAQQELDGKPASPTPVIVASHTANK	R	E	847	872	26	3,4	1S(79.9663)	sp|P35606|COPB2_HUMAN	P35606	COPB2_HUMAN	COPB2	Coatomer subunit beta'			2	2.0264648E7	MS/MS	STY:79.9663@S(0.3004)T(0.3004)AQQELDGKPAS(0.1915)PT(0.1915)PVIVAS(0.0081)HT(0.0081)ANK;
STTPPPAEPVSLPQEPPK	S[79.9663]TTPPPAEPVSLPQEPPK	K	A	225	242	18	2	1S(79.9663)	sp|Q9UN86|G3BP2_HUMAN	Q9UN86	G3BP2_HUMAN	G3BP2	Ras GTPase-activating protein-binding protein 2			1	5.71667e+06	MS/MS	STY:79.9663@S(0.3305)T(0.3305)T(0.3305)PPPAEPVS(0.0084)LPQEPPK;
SVEVHGAVGASGCPAA	S[79.9663]VEVHGAVGASGC[57.0215]PAA	R	-	3680	3695	16	2	13C(57.0215),1S(79.9663)	sp|O15230|LAMA5_HUMAN	O15230	LAMA5_HUMAN	LAMA5	Laminin subunit alpha-5			1	0	MS/MS	STY:79.9663@S(0.9434)VEVHGAVGAS(0.0566)GCPAA;
SVSPPPK	S[79.9663]VSPPPK	R	R	314	320	7	2	1S(79.9663)	sp|Q13247|SRSF6_HUMAN	Q13247	SRSF6_HUMAN	SRSF6	Serine/arginine-rich splicing factor 6			2	468415	MS/MS	STY:79.9663@S(0.5000)VS(0.5000)PPPK;
TASPPPPPK	TAS[79.9663]PPPPPK	R	R	614	622	9	2	3S(79.9663)	sp|Q8IYB3|SRRM1_HUMAN	Q8IYB3	SRRM1_HUMAN	SRRM1	Serine/arginine repetitive matrix protein 1			1	2.92685e+06	MS/MS	STY:79.9663@T(0.0564)AS(0.9436)PPPPPK;
TDSREDEISPPPPNPVVK	TDSREDEIS[79.9663]PPPPNPVVK	R	G	75	92	18	3	9S(79.9663)	sp|P10644|KAP0_HUMAN	P10644	KAP0_HUMAN	PRKAR1A	cAMP-dependent protein kinase type I-alpha regulatory subunit			2	912768	MS/MS	STY:79.9663@T(0.0864)DS(0.0864)REDEIS(0.8273)PPPPNPVVK;
TESPATAAETASEELDNR	TESPATAAETAS[79.9663]EELDNR	R	S	39	56	18	2	12S(79.9663)	sp|Q9NTJ3|SMC4_HUMAN	Q9NTJ3	SMC4_HUMAN	SMC4	Structural maintenance of chromosomes protein 4			1	1.86568e+06	MS/MS	STY:79.9663@T(0.0569)ES(0.0632)PAT(0.0658)AAET(0.0180)AS(0.7960)EELDNR;
TFQKWLKETEGSIPPTETSMSAK	TFQKWLKET[79.9663]EGSIPPTETSMSAK	R	E	4338	4360	23	3	9T(79.9663)	sp|Q9UPN3|MACF1_HUMAN	Q9UPN3	MACF1_HUMAN	MACF1	Microtubule-actin cross-linking factor 1, isoforms 1/2/3/4/5			1	0	MS/MS	STY:79.9663@T(0.0297)FQKWLKET(0.6653)EGS(0.0074)IPPT(0.0282)ET(0.0282)S(0.0282)MS(0.2130)AK;
TGLSAGVTGTTGPSAEATGK	TGLSAGVTGTT[79.9663]GPS[79.9663]AEATGK	K	T	6002	6021	20	3	11T(79.9663),14S(79.9663)	sp|Q7Z5P9|MUC19_HUMAN	Q7Z5P9	MUC19_HUMAN	MUC19	Mucin-19			1	0	MS/MS	STY:79.9663@T(0.0297)GLS(0.0443)AGVT(0.0691)GT(0.0691)T(0.5960)GPS(0.5960)AEAT(0.5960)GK;
TIGGGDDSFNTFFSETGAGK	TIGGGDDS[79.9663]FNTFFSETGAGK	K	H	41	60	20	2	8S(79.9663)	sp|Q9BQE3|TBA1C_HUMAN	Q9BQE3	TBA1C_HUMAN	TUBA1C	Tubulin alpha-1C chain	TUBA1A, TUBA1B, TUBA3C, TUBA3D, TUBA3E	sp|P0DPH7|TBA3C_HUMAN, sp|P0DPH8|TBA3D_HUMAN, sp|P68363|TBA1B_HUMAN, sp|Q6PEY2|TBA3E_HUMAN, sp|Q71U36|TBA1A_HUMAN	1	0	MS/MS	STY:79.9663@T(0.0135)IGGGDDS(0.8816)FNT(0.0336)FFS(0.0261)ET(0.0451)GAGK;
TPPRDLPTIPGVTSPSSDEPPMEASQSHLR	TPPRDLPTIPGVTSPSSDEPPMEAS[79.9663]QSHLR	K	N	70	99	30	3	25S(79.9663)	sp|Q13541|4EBP1_HUMAN	Q13541	4EBP1_HUMAN	EIF4EBP1	Eukaryotic translation initiation factor 4E-binding protein 1			1	9945267	MS/MS	STY:79.9663@T(0.1218)PPRDLPT(0.1218)IPGVT(0.1483)S(0.1065)PS(0.1211)S(0.1211)DEPPMEAS(0.2564)QS(0.0031)HLR;
TPPRDLPTIPGVTSPSSDEPPMEASQSHLR	TPPRDLPTIPGVT[79.9663]SPSSDEPPMEASQSHLR	K	N	70	99	30	3	13T(79.9663)	sp|Q13541|4EBP1_HUMAN	Q13541	4EBP1_HUMAN	EIF4EBP1	Eukaryotic translation initiation factor 4E-binding protein 1			1	1.0673644E7	MS/MS	STY:79.9663@T(0.0750)PPRDLPT(0.0750)IPGVT(0.3915)S(0.3915)PS(0.0269)S(0.0269)DEPPMEAS(0.0066)QS(0.0066)HLR;
TPPRDLPTIPGVTSPSSDEPPMEASQSHLR	TPPRDLPT[79.9663]IPGVTSPSSDEPPMEASQSHLR	K	N	70	99	30	3,4	8T(79.9663)	sp|Q13541|4EBP1_HUMAN	Q13541	4EBP1_HUMAN	EIF4EBP1	Eukaryotic translation initiation factor 4E-binding protein 1			2	1.4274374E7	MS/MS	STY:79.9663@T(0.0077)PPRDLPT(0.9320)IPGVT(0.0111)S(0.0102)PS(0.0102)S(0.0101)DEPPMEAS(0.0094)QS(0.0094)HLR;
TQPDGTSVPGEPASPISQR	TQPDGTSVPGEPAS[79.9663]PISQR	R	L	1744	1762	19	2	14S(79.9663)	sp|Q14980|NUMA1_HUMAN	Q14980	NUMA1_HUMAN	NUMA1	Nuclear mitotic apparatus protein 1			2	6.47315e+06	MS/MS	STY:79.9663@T(0.0145)QPDGT(0.0145)S(0.0145)VPGEPAS(0.9429)PIS(0.0135)QR;
TQTPPVSPAPQPTEER	TQT[79.9663]PPVSPAPQPTEER	K	L	399	414	16	2	3T(79.9663)	sp|Q14247|SRC8_HUMAN	Q14247	SRC8_HUMAN	CTTN	Src substrate cortactin			1	3656616	MS/MS	STY:79.9663@T(0.0151)QT(0.4866)PPVS(0.4866)PAPQPT(0.0116)EER;
TSTSPPPEK	TSTS[79.9663]PPPEK	K	S	220	228	9	2	4S(79.9663)	sp|Q9H1E3|NUCKS_HUMAN	Q9H1E3	NUCKS_HUMAN	NUCKS1	Nuclear ubiquitous casein and cyclin-dependent kinase substrate 1			1	3.14041e+06	MS/MS	STY:79.9663@T(0.0251)S(0.0251)T(0.0251)S(0.9246)PPPEK;
TSPPLLDR	TS[79.9663]PPLLDR	R	A	2397	2404	8	2	2S(79.9663)	sp|Q9UQ35|SRRM2_HUMAN	Q9UQ35	SRRM2_HUMAN	SRRM2	Serine/arginine repetitive matrix protein 2			1	1.0102666E7	MS/MS	STY:79.9663@T(0.0642)S(0.9358)PPLLDR;
TSTSPPPEK	TS[79.9663]TSPPPEK	K	S	220	228	9	2	2S(79.9663)	sp|Q9H1E3|NUCKS_HUMAN	Q9H1E3	NUCKS_HUMAN	NUCKS1	Nuclear ubiquitous casein and cyclin-dependent kinase substrate 1			4	1.2001794E7	MS/MS	STY:79.9663@T(0.0177)S(0.8891)T(0.0466)S(0.0466)PPPEK;
TASPPPPPK	T[79.9663]ASPPPPPK	R	R	614	622	9	2	1T(79.9663)	sp|Q8IYB3|SRRM1_HUMAN	Q8IYB3	SRRM1_HUMAN	SRRM1	Serine/arginine repetitive matrix protein 1			1	2.92685e+06	MS/MS	STY:79.9663@T(0.5000)AS(0.5000)PPPPPK;
TLSSSAQEDIIR	T[79.9663]LSSSAQEDIIR	R	W	313	324	12	2	1T(79.9663)	sp|Q9H788|SH24A_HUMAN	Q9H788	SH24A_HUMAN	SH2D4A	SH2 domain-containing protein 4A			1	5.19721e+06	MS/MS	STY:79.9663@T(0.2500)LS(0.2500)S(0.2500)S(0.2500)AQEDIIR;
TPELPEPSVK	T[79.9663]PELPEPSVK	K	V	220	229	10	2	1T(79.9663)	sp|Q8IYB3|SRRM1_HUMAN	Q8IYB3	SRRM1_HUMAN	SRRM1	Serine/arginine repetitive matrix protein 1			1	3087293	MS/MS	STY:79.9663@T(0.7235)PELPEPS(0.2765)VK;
TPPRDLPTIPGVTSPSSDEPPMEASQSHLR	T[79.9663]PPRDLPTIPGVTSPSSDEPPMEASQSHLR	K	N	70	99	30	3	1T(79.9663)	sp|Q13541|4EBP1_HUMAN	Q13541	4EBP1_HUMAN	EIF4EBP1	Eukaryotic translation initiation factor 4E-binding protein 1			2	9945267	MS/MS	STY:79.9663@T(0.6921)PPRDLPT(0.1584)IPGVT(0.0190)S(0.0190)PS(0.0190)S(0.0190)DEPPMEAS(0.0368)QS(0.0368)HLR;
TPTPSTPGDTQPNTPAPVPPAEDGIK	T[79.9663]PTPSTPGDTQPNTPAPVPPAEDGIK	K	I	1540	1565	26	3	1T(79.9663)	sp|Q14839|CHD4_HUMAN	Q14839	CHD4_HUMAN	CHD4	Chromodomain-helicase-DNA-binding protein 4			1	1.53565e+06	MS/MS	STY:79.9663@T(0.1942)PT(0.1942)PS(0.1942)T(0.1942)PGDT(0.1942)QPNT(0.0292)PAPVPPAEDGIK;
TQDPSSPGTTPPQAR	T[79.9663]QDPSSPGTTPPQAR	R	Q	424	438	15	2	1T(79.9663)	sp|Q13112|CAF1B_HUMAN	Q13112	CAF1B_HUMAN	CHAF1B	Chromatin assembly factor 1 subunit B			1	0	MS/MS	STY:79.9663@T(0.3285)QDPS(0.3285)S(0.3285)PGT(0.0079)T(0.0067)PPQAR;
TQTPPVSPAPQPTEER	T[79.9663]QTPPVSPAPQPTEER	K	L	399	414	16	2	1T(79.9663)	sp|Q14247|SRC8_HUMAN	Q14247	SRC8_HUMAN	CTTN	Src substrate cortactin			1	3656616	MS/MS	STY:79.9663@T(0.4879)QT(0.4879)PPVS(0.0115)PAPQPT(0.0126)EER;
TQTPPVSPAPQPTEER	T[79.9663]QTPPVSPAPQPT[79.9663]EER	K	L	399	414	16	2	13T(79.9663),1T(79.9663)	sp|Q14247|SRC8_HUMAN	Q14247	SRC8_HUMAN	CTTN	Src substrate cortactin			2	4.68756e+06	MS/MS	STY:79.9663@T(0.8972)QT(0.0714)PPVS(0.1355)PAPQPT(0.8960)EER;
TQTPPVSPAPQPTEER	T[79.9663]QTPPVS[79.9663]PAPQPTEER	K	L	399	414	16	2	1T(79.9663),7S(79.9663)	sp|Q14247|SRC8_HUMAN	Q14247	SRC8_HUMAN	CTTN	Src substrate cortactin			1	4.68756e+06	MS/MS	STY:79.9663@T(0.5151)QT(0.5151)PPVS(0.5473)PAPQPT(0.4224)EER;
TSGTEPKIKYYAELCAPPGNSDPEQLK	T[79.9663]SGTEPKIKYYAELC[57.0215]APPGNSDPEQLK	R	K	559	585	27	3	15C(57.0215),1T(79.9663)	sp|Q96G03|PGM2_HUMAN	Q96G03	PGM2_HUMAN	PGM2	Phosphopentomutase			1	0	MS/MS	STY:79.9663@T(0.2399)S(0.2399)GT(0.2399)EPKIKY(0.1374)Y(0.1374)AELCAPPGNS(0.0054)DPEQLK;
TSPDTLR	T[79.9663]SPDTLR	R	R	25	31	7	2	1T(79.9663)	sp|Q01130|SRSF2_HUMAN	Q01130	SRSF2_HUMAN	SRSF2	Serine/arginine-rich splicing factor 2			1	4481993	MS/MS	STY:79.9663@T(0.3333)S(0.3333)PDT(0.3333)LR;
TSPENVQDR	T[79.9663]SPENVQDR	K	F	1399	1407	9	2	1T(79.9663)	sp|P49792|RBP2_HUMAN	P49792	RBP2_HUMAN	RANBP2	E3 SUMO-protein ligase RanBP2			1	0	MS/MS	STY:79.9663@T(0.5000)S(0.5000)PENVQDR;
TSPPLLDR	T[79.9663]SPPLLDR	R	A	2397	2404	8	2	1T(79.9663)	sp|Q9UQ35|SRRM2_HUMAN	Q9UQ35	SRRM2_HUMAN	SRRM2	Serine/arginine repetitive matrix protein 2			1	1.0102666E7	MS/MS	STY:79.9663@T(0.5000)S(0.5000)PPLLDR;
TSTSPPPEK	T[79.9663]STSPPPEK	K	S	220	228	9	2	1T(79.9663)	sp|Q9H1E3|NUCKS_HUMAN	Q9H1E3	NUCKS_HUMAN	NUCKS1	Nuclear ubiquitous casein and cyclin-dependent kinase substrate 1			5	1.1767008E7	MS/MS	STY:79.9663@T(0.2500)S(0.2500)T(0.2500)S(0.2500)PPPEK;
TVFSPTLPAAR	T[79.9663]VFSPTLPAAR	K	S	375	385	11	2	1T(79.9663)	sp|Q7Z2W4|ZCCHV_HUMAN	Q7Z2W4	ZCCHV_HUMAN	ZC3HAV1	Zinc finger CCCH-type antiviral protein 1			1	1.1645e+06	MS/MS	STY:79.9663@T(0.3333)VFS(0.3333)PT(0.3333)LPAAR;
VAEPGAEATSSTGEESGSEHPPAVPMHNK	VAEPGAEAT[79.9663]SSTGEESGSEHPPAVPMHNK	R	R	443	471	29	3	9T(79.9663)	sp|Q14684|RRP1B_HUMAN	Q14684	RRP1B_HUMAN	RRP1B	Ribosomal RNA processing protein 1 homolog B			1	1.50817e+06	MS/MS	STY:79.9663@VAEPGAEAT(0.4782)S(0.4782)S(0.0080)T(0.0080)GEES(0.0138)GS(0.0138)EHPPAVPMHNK;
VALSDDETK	VALS[79.9663]DDETK	R	E	304	312	9	2	4S(79.9663)	sp|Q15054|DPOD3_HUMAN	Q15054	DPOD3_HUMAN	POLD3	DNA polymerase delta subunit 3			1	7265262	MS/MS	STY:79.9663@VALS(0.5000)DDET(0.5000)K;
VASDTEEADR	VAS[79.9663]DTEEADR	K	T	654	663	10	2	3S(79.9663)	sp|Q9P2R6|RERE_HUMAN	Q9P2R6	RERE_HUMAN	RERE	Arginine-glutamic acid dipeptide repeats protein			1	0	MS/MS	STY:79.9663@VAS(0.5000)DT(0.5000)EEADR;
VASPSQGQVGSSSPK	VAS[79.9663]PSQGQVGSSSPK	R	R	325	339	15	2	3S(79.9663)	sp|Q99569|PKP4_HUMAN	Q99569	PKP4_HUMAN	PKP4	Plakophilin-4			1	881359	MS/MS	STY:79.9663@VAS(0.2000)PS(0.2000)QGQVGS(0.2000)S(0.2000)S(0.2000)PK;
VATLNSEEESDPPTYK	VATLNS[79.9663]EEESDPPTYK	K	D	26	41	16	2	6S(79.9663)	sp|Q00341|VIGLN_HUMAN	Q00341	VIGLN_HUMAN	HDLBP	Vigilin			1	0	MS/MS	STY:79.9663@VAT(0.0203)LNS(0.5210)EEES(0.0094)DPPT(0.2246)Y(0.2246)K;
VAVATPAKK	VAVAT[79.9663]PAKK	K	A	72	80	9	2	5T(79.9663)	sp|P19338|NUCL_HUMAN	P19338	NUCL_HUMAN	NCL	Nucleolin			1	1.77959e+06	MS/MS	STY:79.9663@VAVAT(1.0000)PAKK;
VDEDSAEDTQSNDGK	VDEDSAEDTQS[79.9663]NDGK	K	E	561	575	15	2	11S(79.9663)	sp|Q9H2G2|SLK_HUMAN	Q9H2G2	SLK_HUMAN	SLK	STE20-like serine/threonine-protein kinase			1	0	MS/MS	STY:79.9663@VDEDS(0.0877)AEDT(0.0269)QS(0.8854)NDGK;
VDGETASDSESR	VDGET[79.9663]ASDSESR	K	A	27	38	12	2	5T(79.9663)	sp|O95674|CDS2_HUMAN	O95674	CDS2_HUMAN	CDS2	Phosphatidate cytidylyltransferase 2			1	0	MS/MS	STY:79.9663@VDGET(0.2500)AS(0.2500)DS(0.2500)ES(0.2500)R;
VDIDTPDIDIHGPEGK	VDIDT[79.9663]PDIDIHGPEGK	K	L	4096	4111	16	3	5T(79.9663)	sp|Q09666|AHNK_HUMAN	Q09666	AHNK_HUMAN	AHNAK	Neuroblast differentiation-associated protein AHNAK			1	1.39166e+06	MS/MS	STY:79.9663@VDIDT(1.0000)PDIDIHGPEGK;
VDINTPDVDVHGPDWHLK	VDINT[79.9663]PDVDVHGPDWHLK	K	M	4762	4779	18	3	5T(79.9663)	sp|Q09666|AHNK_HUMAN	Q09666	AHNK_HUMAN	AHNAK	Neuroblast differentiation-associated protein AHNAK			2	2.37115e+06	MS/MS	STY:79.9663@VDINT(1.0000)PDVDVHGPDWHLK;
VDSTTCLFPVEEK	VDS[79.9663]TTC[57.0215]LFPVEEK	R	A	259	271	13	2	3S(79.9663),6C(57.0215)	sp|Q06210|GFPT1_HUMAN	Q06210	GFPT1_HUMAN	GFPT1	Glutamine--fructose-6-phosphate aminotransferase [isomerizing] 1			3	3.3994764E7	MS/MS	STY:79.9663@VDS(0.4918)T(0.4918)T(0.0163)CLFPVEEK;
VEAKEESEESDEDMGFGLFD	VEAKEES[79.9663]EES[79.9663]DEDMGFGLFD	K	-	298	317	20	2,3	10S(79.9663),7S(79.9663)	sp|P05388|RLA0_HUMAN	P05388	RLA0_HUMAN	RPLP0	Large ribosomal subunit protein uL10	RPLP0P6	sp|Q8NHW5|RLA0L_HUMAN	3	4581660	MS/MS	STY:79.9663@VEAKEES(1.0000)EES(1.0000)DEDMGFGLFD;
VEAPSLDVHMDSPDINIEGPDVK	VEAPSLDVHMDS[79.9663]PDINIEGPDVK	K	I	4949	4971	23	3	12S(79.9663)	sp|Q09666|AHNK_HUMAN	Q09666	AHNK_HUMAN	AHNAK	Neuroblast differentiation-associated protein AHNAK			1	2.31222e+06	MS/MS	STY:79.9663@VEAPS(0.0928)LDVHMDS(0.9072)PDINIEGPDVK;
VETVSQPSESPK	VET[79.9663]VSQPSESPK	K	D	767	778	12	2	3T(79.9663)	sp|Q99590|SCAFB_HUMAN	Q99590	SCAFB_HUMAN	SCAF11	Protein SCAF11			1	1.6158e+06	MS/MS	STY:79.9663@VET(0.2500)VS(0.2500)QPS(0.2500)ES(0.2500)PK;
VFDDESDEK	VFDDES[79.9663]DEK	K	E	637	645	9	2	6S(79.9663)	sp|O43719|HTSF1_HUMAN	O43719	HTSF1_HUMAN	HTATSF1	17S U2 SnRNP complex component HTATSF1			1	0	MS/MS	STY:79.9663@VFDDES(1.0000)DEK;
VGDPPQPLPEEPMEVQGAERASPEPQR	VGDPPQPLPEEPMEVQGAERAS[79.9663]PEPQR	R	E	943	969	27	3	22S(79.9663)	sp|P46379|BAG6_HUMAN	P46379	BAG6_HUMAN	BAG6	Large proline-rich protein BAG6			2	3.13627e+06	MS/MS	STY:79.9663@VGDPPQPLPEEPMEVQGAERAS(1.0000)PEPQR;
VGDSTPVSEK	VGDS[79.9663]TPVSEK	R	P	429	438	10	2	4S(79.9663)	sp|Q9H8Y8|GORS2_HUMAN	Q9H8Y8	GORS2_HUMAN	GORASP2	Golgi reassembly-stacking protein 2			2	6.00246e+06	MS/MS	STY:79.9663@VGDS(0.3333)T(0.3333)PVS(0.3333)EK;
VGDTEKPEPERSPPNR	VGDTEKPEPERS[79.9663]PPNR	R	K	250	265	16	3	12S(79.9663)	sp|Q9NZ63|TLS1_HUMAN	Q9NZ63	TLS1_HUMAN	C9orf78	Splicing factor C9orf78			1	3.1425e+06	MS/MS	STY:79.9663@VGDT(0.0770)EKPEPERS(0.9230)PPNR;
VGEDEDGSDEEVVHNEDIHFEPIVSLPEVEVK	VGEDEDGSDEEVVHNEDIHFEPIVS[79.9663]LPEVEVK	K	S	2893	2924	32	4	25S(79.9663)	sp|P49792|RBP2_HUMAN	P49792	RBP2_HUMAN	RANBP2	E3 SUMO-protein ligase RanBP2			1	0	MS/MS	STY:79.9663@VGEDEDGS(0.1149)DEEVVHNEDIHFEPIVS(0.8851)LPEVEVK;
VGGSDEEASGIPSR	VGGS[79.9663]DEEASGIPSR	R	T	356	369	14	2	4S(79.9663)	sp|Q9NQ55|SSF1_HUMAN	Q9NQ55	SSF1_HUMAN	PPAN	Suppressor of SWI4 1 homolog			3	1.0510798E7	MS/MS	STY:79.9663@VGGS(0.9480)DEEAS(0.0259)GIPS(0.0261)R;
VGGSSVDLHR	VGGS[79.9663]SVDLHR	R	F	265	274	10	2	4S(79.9663)	sp|O60716|CTND1_HUMAN	O60716	CTND1_HUMAN	CTNND1	Catenin delta-1			1	2.77761e+06	MS/MS	STY:79.9663@VGGS(0.5000)S(0.5000)VDLHR;
VGNESPVQELK	VGNES[79.9663]PVQELK	K	Q	46	56	11	2	5S(79.9663)	sp|Q5JSH3|WDR44_HUMAN	Q5JSH3	WDR44_HUMAN	WDR44	WD repeat-containing protein 44			1	0	MS/MS	STY:79.9663@VGNES(1.0000)PVQELK;
VGVEASEETPQTSSSSARPGTPSDHQSQEASQFER	VGVEASEETPQTSSSSARPGTPS[79.9663]DHQSQEASQFER	R	K	362	396	35	4	23S(79.9663)	sp|Q6Y7W6|GGYF2_HUMAN	Q6Y7W6	GGYF2_HUMAN	GIGYF2	GRB10-interacting GYF protein 2			1	3893468	MS/MS	STY:79.9663@VGVEAS(0.0119)EET(0.0119)PQT(0.0119)S(0.0119)S(0.0119)S(0.0119)S(0.0119)ARPGT(0.0119)PS(0.8742)DHQS(0.0175)QEAS(0.0133)QFER;
VHNDAQSFDYDHDAFLGAEEAK	VHNDAQSFDY[79.9663]DHDAFLGAEEAK	K	T	38	59	22	3	10Y(79.9663)	sp|O43852|CALU_HUMAN	O43852	CALU_HUMAN	CALU	Calumenin			10	1.08120064E8	MS/MS	STY:79.9663@VHNDAQS(0.0514)FDY(0.9486)DHDAFLGAEEAK;
VHNDAQSFDYDHDAFLGAEEAK	VHNDAQS[79.9663]FDYDHDAFLGAEEAK	K	T	38	59	22	3	7S(79.9663)	sp|O43852|CALU_HUMAN	O43852	CALU_HUMAN	CALU	Calumenin			19	1.08120064E8	MS/MS	STY:79.9663@VHNDAQS(0.9488)FDY(0.0512)DHDAFLGAEEAK;
VKPASPVAQPK	VKPAS[79.9663]PVAQPK	K	E	761	771	11	2,3	5S(79.9663)	sp|Q96EV2|RBM33_HUMAN	Q96EV2	RBM33_HUMAN	RBM33	RNA-binding protein 33			4	4282308	MS/MS	STY:79.9663@VKPAS(1.0000)PVAQPK;
VKPETPPR	VKPET[79.9663]PPR	K	Q	979	986	8	2	5T(79.9663)	sp|Q9UQ35|SRRM2_HUMAN	Q9UQ35	SRRM2_HUMAN	SRRM2	Serine/arginine repetitive matrix protein 2			3	8771841	MS/MS	STY:79.9663@VKPET(1.0000)PPR;
VKPPPSPTTEGPSLQPDLAPEEAAGTQRPK	VKPPPSPTTEGPS[79.9663]LQPDLAPEEAAGTQRPK	K	N	1004	1033	30	4	13S(79.9663)	sp|Q9Y2D5|PLAK2_HUMAN	Q9Y2D5	PLAK2_HUMAN	PALM2AKAP2	PALM2-AKAP2 fusion protein			1	6.83305e+06	MS/MS	STY:79.9663@VKPPPS(0.0195)PT(0.0271)T(0.0271)EGPS(0.9053)LQPDLAPEEAAGT(0.0211)QRPK;
VKPPPSPTTEGPSLQPDLAPEEAAGTQRPK	VKPPPSPTT[79.9663]EGPSLQPDLAPEEAAGTQRPK	K	N	1004	1033	30	4	9T(79.9663)	sp|Q9Y2D5|PLAK2_HUMAN	Q9Y2D5	PLAK2_HUMAN	PALM2AKAP2	PALM2-AKAP2 fusion protein			1	6.83305e+06	MS/MS	STY:79.9663@VKPPPS(0.0126)PT(0.0126)T(0.8523)EGPS(0.0763)LQPDLAPEEAAGT(0.0462)QRPK;
VKPPPSPTTEGPSLQPDLAPEEAAGTQRPK	VKPPPS[79.9663]PTTEGPSLQPDLAPEEAAGTQRPK	K	N	1004	1033	30	3	6S(79.9663)	sp|Q9Y2D5|PLAK2_HUMAN	Q9Y2D5	PLAK2_HUMAN	PALM2AKAP2	PALM2-AKAP2 fusion protein			1	3.75978e+06	MS/MS	STY:79.9663@VKPPPS(0.3269)PT(0.3269)T(0.3269)EGPS(0.0082)LQPDLAPEEAAGT(0.0110)QRPK;
VLDEEGSER	VLDEEGS[79.9663]ER	K	E	610	618	9	2	7S(79.9663)	sp|O43719|HTSF1_HUMAN	O43719	HTSF1_HUMAN	HTATSF1	17S U2 SnRNP complex component HTATSF1			1	897655	MS/MS	STY:79.9663@VLDEEGS(1.0000)ER;
VLGSEGEEEDEALSPAK	VLGSEGEEEDEALS[79.9663]PAK	R	G	63	79	17	2	14S(79.9663)	sp|P18858|DNLI1_HUMAN	P18858	DNLI1_HUMAN	LIG1	DNA ligase 1			1	0	MS/MS	STY:79.9663@VLGS(0.1274)EGEEEDEALS(0.8726)PAK;
VLGSEGEEEDEALSPAK	VLGS[79.9663]EGEEEDEALSPAK	R	G	63	79	17	2	4S(79.9663)	sp|P18858|DNLI1_HUMAN	P18858	DNLI1_HUMAN	LIG1	DNA ligase 1			1	2.34648e+06	MS/MS	STY:79.9663@VLGS(0.8296)EGEEEDEALS(0.1704)PAK;
VLPEFDTPGHTLSWGKGQKDLLTPCYSR	VLPEFDT[79.9663]PGHT[79.9663]LSWGKGQKDLLTPC[57.0215]YSR	R	Q	285	312	28	3	11T(79.9663),25C(57.0215),7T(79.9663)	sp|P07686|HEXB_HUMAN	P07686	HEXB_HUMAN	HEXB	Beta-hexosaminidase subunit beta			1	4.7619792E7	MS/MS	STY:79.9663@VLPEFDT(0.3499)PGHT(0.3499)LS(0.3499)WGKGQKDLLT(0.3261)PCY(0.2980)S(0.3261)R;
VLSPTAAK	VLS[79.9663]PTAAK	K	P	311	318	8	2	3S(79.9663)	sp|Q96QC0|PP1RA_HUMAN	Q96QC0	PP1RA_HUMAN	PPP1R10	Serine/threonine-protein phosphatase 1 regulatory subunit 10			1	0	MS/MS	STY:79.9663@VLS(0.5000)PT(0.5000)AAK;
VLTANSNPSSPSAAK	VLTANSNPS[79.9663]SPSAAK	K	R	186	200	15	2	9S(79.9663)	sp|Q9NV56|MRGBP_HUMAN	Q9NV56	MRGBP_HUMAN	MRGBP	MRG/MORF4L-binding protein			1	756883	MS/MS	STY:79.9663@VLT(0.0094)ANS(0.0095)NPS(0.4825)S(0.4825)PS(0.0161)AAK;
VMTIPYQPMPASSPVICAGGQDR	VMTIPYQPMPAS[79.9663]SPVIC[57.0215]AGGQDR	R	C	178	200	23	3	12S(79.9663),17C(57.0215)	sp|Q15365|PCBP1_HUMAN	Q15365	PCBP1_HUMAN	PCBP1	Poly(rC)-binding protein 1			1	0	MS/MS	STY:79.9663@VMT(0.1177)IPY(0.0994)QPMPAS(0.7676)S(0.0153)PVICAGGQDR;
VNDAEPGSPEAPQGK	VNDAEPGS[79.9663]PEAPQGK	R	R	76	90	15	2	8S(79.9663)	sp|Q8N8A6|DDX51_HUMAN	Q8N8A6	DDX51_HUMAN	DDX51	ATP-dependent RNA helicase DDX51			2	2.76809e+06	MS/MS	STY:79.9663@VNDAEPGS(1.0000)PEAPQGK;
VNGDDHHEEDMDMSD	VNGDDHHEEDMDMS[79.9663]D	K	-	470	484	15	2	14S(79.9663)	sp|Q05519|SRS11_HUMAN	Q05519	SRS11_HUMAN	SRSF11	Serine/arginine-rich splicing factor 11			1	1.16025e+06	MS/MS	STY:79.9663@VNGDDHHEEDMDMS(1.0000)D;
VNNGNTAPEDSSPAK	VNNGNTAPEDS[79.9663]SPAK	R	K	23	37	15	2	11S(79.9663)	sp|Q9UGN5|PARP2_HUMAN	Q9UGN5	PARP2_HUMAN	PARP2	Poly [ADP-ribose] polymerase 2			1	592914	MS/MS	STY:79.9663@VNNGNT(0.0425)APEDS(0.4788)S(0.4788)PAK;
VNPVTSLSENYTCSDSEESSEK	VNPVTSLSENYTC[57.0215]S[79.9663]DSEESSEK	R	D	395	416	22	3	13C(57.0215),14S(79.9663)	sp|Q14432|PDE3A_HUMAN	Q14432	PDE3A_HUMAN	PDE3A	cGMP-inhibited 3',5'-cyclic phosphodiesterase 3A			1	0	MS/MS	STY:79.9663@VNPVT(0.0271)S(0.0271)LS(0.0271)ENY(0.0457)T(0.0457)CS(0.2069)DS(0.2069)EES(0.2069)S(0.2069)EK;
VPDEEENEESDNEK	VPDEEENEES[79.9663]DNEK	K	E	1097	1110	14	2	10S(79.9663)	sp|P11388|TOP2A_HUMAN	P11388	TOP2A_HUMAN	TOP2A	DNA topoisomerase 2-alpha			8	1.4726267E7	MS/MS	STY:79.9663@VPDEEENEES(1.0000)DNEK;
VPKPEPIPEPKEPSPEK	VPKPEPIPEPKEPS[79.9663]PEK	K	N	247	263	17	3	14S(79.9663)	sp|Q8IYB3|SRRM1_HUMAN	Q8IYB3	SRRM1_HUMAN	SRRM1	Serine/arginine repetitive matrix protein 1			2	3.20915e+06	MS/MS	STY:79.9663@VPKPEPIPEPKEPS(1.0000)PEK;
VPPAPVPCPPPSPGPSAVPSSPK	VPPAPVPC[57.0215]PPPSPGPSAVPS[79.9663]SPK	K	S	366	388	23	3	20S(79.9663),8C(57.0215)	sp|O95817|BAG3_HUMAN	O95817	BAG3_HUMAN	BAG3	BAG family molecular chaperone regulator 3			1	3.79405e+06	MS/MS	STY:79.9663@VPPAPVPCPPPS(0.0347)PGPS(0.0121)AVPS(0.4766)S(0.4766)PK;
VPPAPVPCPPPSPGPSAVPSSPK	VPPAPVPC[57.0215]PPPSPGPS[79.9663]AVPSSPK	K	S	366	388	23	3	16S(79.9663),8C(57.0215)	sp|O95817|BAG3_HUMAN	O95817	BAG3_HUMAN	BAG3	BAG family molecular chaperone regulator 3			1	3.79405e+06	MS/MS	STY:79.9663@VPPAPVPCPPPS(0.0141)PGPS(0.3286)AVPS(0.3286)S(0.3286)PK;
VPPAPVPCPPPSPGPSAVPSSPK	VPPAPVPC[57.0215]PPPS[79.9663]PGPS[79.9663]AVPSSPK	K	S	366	388	23	3	12S(79.9663),16S(79.9663),8C(57.0215)	sp|O95817|BAG3_HUMAN	O95817	BAG3_HUMAN	BAG3	BAG family molecular chaperone regulator 3			1	2.14662e+06	MS/MS	STY:79.9663@VPPAPVPCPPPS(0.5000)PGPS(0.5000)AVPS(0.5000)S(0.5000)PK;
VPSPDHR	VPS[79.9663]PDHR	R	R	207	213	7	2	3S(79.9663)	sp|Q8NAV1|PR38A_HUMAN	Q8NAV1	PR38A_HUMAN	PRPF38A	Pre-mRNA-splicing factor 38A			2	5.13212e+06	MS/MS	STY:79.9663@VPS(1.0000)PDHR;
VPSVESLFR	VPS[79.9663]VESLFR	R	S	69	77	9	2	3S(79.9663)	sp|Q13439|GOGA4_HUMAN	Q13439	GOGA4_HUMAN	GOLGA4	Golgin subfamily A member 4			1	2319697	MS/MS	STY:79.9663@VPS(0.9493)VES(0.0507)LFR;
VQAYEEPSVASSPNGK	VQAYEEPS[79.9663]VASSPNGK	R	E	719	734	16	2	8S(79.9663)	sp|Q99575|POP1_HUMAN	Q99575	POP1_HUMAN	POP1	Ribonucleases P/MRP protein subunit POP1			1	2.35782e+06	MS/MS	STY:79.9663@VQAY(0.0090)EEPS(0.3303)VAS(0.3303)S(0.3303)PNGK;
VQGEAVSNIQENTQTPTVQEESEEEEVDETGVEVK	VQGEAVSNIQENTQTPTVQEESEEEEVDET[79.9663]GVEVK	K	D	2008	2042	35	3	30T(79.9663)	sp|E9PAV3|NACAM_HUMAN	E9PAV3	NACAM_HUMAN	NACA	Nascent polypeptide-associated complex subunit alpha, muscle-specific form		sp|Q13765|NACA_HUMAN	1	6.40454e+06	MS/MS	STY:79.9663@VQGEAVS(0.0140)NIQENT(0.0140)QT(0.0154)PT(0.0154)VQEES(0.0576)EEEEVDET(0.8837)GVEVK;
VQGEAVSNIQENTQTPTVQEESEEEEVDETGVEVK	VQGEAVSNIQENTQTPTVQEES[79.9663]EEEEVDETGVEVK	K	D	2008	2042	35	3,4	22S(79.9663)	sp|E9PAV3|NACAM_HUMAN	E9PAV3	NACAM_HUMAN	NACA	Nascent polypeptide-associated complex subunit alpha, muscle-specific form		sp|Q13765|NACA_HUMAN	3	1.9104782E7	MS/MS	STY:79.9663@VQGEAVS(0.0666)NIQENT(0.0180)QT(0.0180)PT(0.0180)VQEES(0.8693)EEEEVDET(0.0100)GVEVK;
VQGEAVSNIQENTQTPTVQEESEEEEVDETGVEVK	VQGEAVSNIQENT[79.9663]QTPTVQEESEEEEVDETGVEVK	K	D	2008	2042	35	3	13T(79.9663)	sp|E9PAV3|NACAM_HUMAN	E9PAV3	NACAM_HUMAN	NACA	Nascent polypeptide-associated complex subunit alpha, muscle-specific form		sp|Q13765|NACA_HUMAN	1	2.8217004E7	MS/MS	STY:79.9663@VQGEAVS(0.0079)NIQENT(0.4668)QT(0.4668)PT(0.0274)VQEES(0.0122)EEEEVDET(0.0189)GVEVK;
VQGEAVSNIQENTQTPTVQEESEEEEVDETGVEVK	VQGEAVS[79.9663]NIQENTQTPTVQEESEEEEVDETGVEVK	K	D	2008	2042	35	3,4	7S(79.9663)	sp|E9PAV3|NACAM_HUMAN	E9PAV3	NACAM_HUMAN	NACA	Nascent polypeptide-associated complex subunit alpha, muscle-specific form		sp|Q13765|NACA_HUMAN	7	3.7854484E7	MS/MS	STY:79.9663@VQGEAVS(0.8747)NIQENT(0.0265)QT(0.0265)PT(0.0265)VQEES(0.0265)EEEEVDET(0.0195)GVEVK;
VQSLEGEKLSPK	VQSLEGEKLS[79.9663]PK	K	S	1770	1781	12	2	10S(79.9663)	sp|P46821|MAP1B_HUMAN	P46821	MAP1B_HUMAN	MAP1B	Microtubule-associated protein 1B			3	6845807	MS/MS	STY:79.9663@VQS(0.0518)LEGEKLS(0.9482)PK;
VSAEAEVAPVSPEVTQEVVEEHCASPEDK	VSAEAEVAPVSPEVTQEVVEEHC[57.0215]AS[79.9663]PEDK	K	T	1288	1316	29	3	23C(57.0215),25S(79.9663)	sp|P46821|MAP1B_HUMAN	P46821	MAP1B_HUMAN	MAP1B	Microtubule-associated protein 1B			1	4022279	MS/MS	STY:79.9663@VS(0.1573)AEAEVAPVS(0.0928)PEVT(0.0422)QEVVEEHCAS(0.7077)PEDK;
VSAGEPGSHPSPAPR	VSAGEPGSHPS[79.9663]PAPR	K	R	417	431	15	2,3	11S(79.9663)	sp|Q9Y4F1|FARP1_HUMAN	Q9Y4F1	FARP1_HUMAN	FARP1	FERM, ARHGEF and pleckstrin domain-containing protein 1			5	1.2405172E7	MS/MS	STY:79.9663@VS(0.0308)AGEPGS(0.0261)HPS(0.9430)PAPR;
VSAGEPGSHPSPAPR	VSAGEPGS[79.9663]HPSPAPR	K	R	417	431	15	2	8S(79.9663)	sp|Q9Y4F1|FARP1_HUMAN	Q9Y4F1	FARP1_HUMAN	FARP1	FERM, ARHGEF and pleckstrin domain-containing protein 1			4	1.111384E7	MS/MS	STY:79.9663@VS(0.0261)AGEPGS(0.9449)HPS(0.0290)PAPR;
VSEEQTQPPSPAGAGMSTAMGR	VSEEQTQPPSPAGAGMS[79.9663]TAMGR	K	S	144	165	22	3	17S(79.9663)	sp|Q16666|IF16_HUMAN	Q16666	IF16_HUMAN	IFI16	Gamma-interferon-inducible protein 16			1	0	MS/MS	STY:79.9663@VS(0.0179)EEQT(0.0179)QPPS(0.1963)PAGAGMS(0.3840)T(0.3840)AMGR;
VSLEPHQGPGTPESK	VSLEPHQGPGT[79.9663]PESK	R	K	1990	2004	15	2	11T(79.9663)	sp|Q14980|NUMA1_HUMAN	Q14980	NUMA1_HUMAN	NUMA1	Nuclear mitotic apparatus protein 1			1	3185373	MS/MS	STY:79.9663@VS(0.0801)LEPHQGPGT(0.8912)PES(0.0287)K;
VSAGEPGSHPSPAPR	VS[79.9663]AGEPGSHPSPAPR	K	R	417	431	15	2	2S(79.9663)	sp|Q9Y4F1|FARP1_HUMAN	Q9Y4F1	FARP1_HUMAN	FARP1	FERM, ARHGEF and pleckstrin domain-containing protein 1			2	1.111384E7	MS/MS	STY:79.9663@VS(0.9231)AGEPGS(0.0505)HPS(0.0264)PAPR;
VSHSPPPK	VS[79.9663]HSPPPK	R	Q	635	642	8	2	2S(79.9663)	sp|Q8IYB3|SRRM1_HUMAN	Q8IYB3	SRRM1_HUMAN	SRRM1	Serine/arginine repetitive matrix protein 1			1	806061	MS/MS	STY:79.9663@VS(0.5000)HS(0.5000)PPPK;
VSPENLVDK	VS[79.9663]PENLVDK	R	S	2119	2127	9	2	2S(79.9663)	sp|O75376|NCOR1_HUMAN	O75376	NCOR1_HUMAN	NCOR1	Nuclear receptor corepressor 1			1	1.65775e+06	MS/MS	STY:79.9663@VS(1.0000)PENLVDK;
VSVSPGR	VS[79.9663]VSPGR	R	T	428	434	7	2	2S(79.9663)	sp|Q8IYB3|SRRM1_HUMAN	Q8IYB3	SRRM1_HUMAN	SRRM1	Serine/arginine repetitive matrix protein 1			1	0	MS/MS	STY:79.9663@VS(0.9477)VS(0.0523)PGR;
VTTEIQLPSQSPVEEQSPASLSSLR	VTTEIQLPS[79.9663]QSPVEEQSPASLSSLR	R	S	857	881	25	3	9S(79.9663)	sp|Q8WWI1|LMO7_HUMAN	Q8WWI1	LMO7_HUMAN	LMO7	LIM domain only protein 7			1	1.873905E7	MS/MS	STY:79.9663@VT(0.0436)T(0.0436)EIQLPS(0.7425)QS(0.0066)PVEEQS(0.0415)PAS(0.0511)LS(0.0482)S(0.0228)LR;
VTQHESDNENEIQIQNK	VT[79.9663]QHESDNENEIQIQNK	R	L	117	133	17	3	2T(79.9663)	sp|Q5VZL5|ZMYM4_HUMAN	Q5VZL5	ZMYM4_HUMAN	ZMYM4	Zinc finger MYM-type protein 4			2	2.63633e+06	MS/MS	STY:79.9663@VT(0.9225)QHES(0.0775)DNENEIQIQNK;
VTSPTKV	VT[79.9663]SPTKV	K	-	787	793	7	2	2T(79.9663)	sp|Q05682|CALD1_HUMAN	Q05682	CALD1_HUMAN	CALD1	Caldesmon			1	2460937	MS/MS	STY:79.9663@VT(0.3333)S(0.3333)PT(0.3333)KV;
VVDYSQFQESDDADEDYGR	VVDYSQFQES[79.9663]DDADEDYGR	K	D	10	28	19	2,3	10S(79.9663)	sp|Q9H1E3|NUCKS_HUMAN	Q9H1E3	NUCKS_HUMAN	NUCKS1	Nuclear ubiquitous casein and cyclin-dependent kinase substrate 1			5	4.3661852E7	MS/MS	STY:79.9663@VVDY(0.0186)S(0.0186)QFQES(0.9451)DDADEDY(0.0178)GR;
VVDYSQFQESDDADEDYGR	VVDY[79.9663]SQFQESDDADEDYGR	K	D	10	28	19	2,3	4Y(79.9663)	sp|Q9H1E3|NUCKS_HUMAN	Q9H1E3	NUCKS_HUMAN	NUCKS1	Nuclear ubiquitous casein and cyclin-dependent kinase substrate 1			4	4.3661852E7	MS/MS	STY:79.9663@VVDY(0.4859)S(0.4859)QFQES(0.0135)DDADEDY(0.0147)GR;
VVEAVNSDSDSEFGIPK	VVEAVNS[79.9663]DS[79.9663]DSEFGIPK	K	K	1516	1532	17	2	7S(79.9663),9S(79.9663)	sp|Q02880|TOP2B_HUMAN	Q02880	TOP2B_HUMAN	TOP2B	DNA topoisomerase 2-beta			1	0	MS/MS	STY:79.9663@VVEAVNS(0.6667)DS(0.6667)DS(0.6667)EFGIPK;
VVLGDGVQLPPGDYSTTPGGTLFSTTPGGTR	VVLGDGVQLPPGDYSTTPGGTLFSTTPGGT[79.9663]R	R	I	21	51	31	3	30T(79.9663)	sp|Q13541|4EBP1_HUMAN	Q13541	4EBP1_HUMAN	EIF4EBP1	Eukaryotic translation initiation factor 4E-binding protein 1			1	4494182	MS/MS	STY:79.9663@VVLGDGVQLPPGDY(0.0116)S(0.0129)T(0.0129)T(0.0129)PGGT(0.0294)LFS(0.0067)T(0.0070)T(0.0070)PGGT(0.8996)R;
VVLGDGVQLPPGDYSTTPGGTLFSTTPGGTR	VVLGDGVQLPPGDYSTTPGGT[79.9663]LFS[79.9663]TTPGGTR	R	I	21	51	31	3	21T(79.9663),24S(79.9663)	sp|Q13541|4EBP1_HUMAN	Q13541	4EBP1_HUMAN	EIF4EBP1	Eukaryotic translation initiation factor 4E-binding protein 1			1	0	MS/MS	STY:79.9663@VVLGDGVQLPPGDY(0.0124)S(0.0338)T(0.0338)T(0.0338)PGGT(0.4647)LFS(0.3554)T(0.3554)T(0.3554)PGGT(0.3554)R;
VVLGDGVQLPPGDYSTTPGGTLFSTTPGGTR	VVLGDGVQLPPGDY[79.9663]S[79.9663]TTPGGTLFSTTPGGTR	R	I	21	51	31	3	14Y(79.9663),15S(79.9663)	sp|Q13541|4EBP1_HUMAN	Q13541	4EBP1_HUMAN	EIF4EBP1	Eukaryotic translation initiation factor 4E-binding protein 1			2	3.4017e+06	MS/MS	STY:79.9663@VVLGDGVQLPPGDY(0.3144)S(0.3144)T(0.0296)T(0.0296)PGGT(0.0542)LFS(0.3144)T(0.3144)T(0.3144)PGGT(0.3144)R;
VVNTDHGSPEQLQIPVTDSGR	VVNTDHGS[79.9663]PEQLQIPVTDSGR	R	H	271	291	21	3	8S(79.9663)	sp|Q6IQ49|SDE2_HUMAN	Q6IQ49	SDE2_HUMAN	SDE2	Splicing regulator SDE2			1	1991962	MS/MS	STY:79.9663@VVNT(0.0453)DHGS(0.8513)PEQLQIPVT(0.0356)DS(0.0678)GR;
VVNTDHGSPEQLQIPVTDSGR	VVNT[79.9663]DHGSPEQLQIPVTDSGR	R	H	271	291	21	3	4T(79.9663)	sp|Q6IQ49|SDE2_HUMAN	Q6IQ49	SDE2_HUMAN	SDE2	Splicing regulator SDE2			1	1991962	MS/MS	STY:79.9663@VVNT(0.7665)DHGS(0.0156)PEQLQIPVT(0.1089)DS(0.1089)GR;
VVPGQFDDADSSDSENR	VVPGQFDDADSSDS[79.9663]ENR	R	D	11	27	17	2	14S(79.9663)	sp|Q9BRS2|RIOK1_HUMAN	Q9BRS2	RIOK1_HUMAN	RIOK1	Serine/threonine-protein kinase RIO1			2	2615794	MS/MS	STY:79.9663@VVPGQFDDADS(0.0285)S(0.0285)DS(0.9430)ENR;
VVVSPTKK	VVVSPT[79.9663]KK	K	V	64	71	8	2	6T(79.9663)	sp|P19338|NUCL_HUMAN	P19338	NUCL_HUMAN	NCL	Nucleolin			1	2.1551578E7	MS/MS	STY:79.9663@VVVS(0.0823)PT(0.9177)KK;
VVVSPTK	VVVS[79.9663]PTK	K	K	64	70	7	2	4S(79.9663)	sp|P19338|NUCL_HUMAN	P19338	NUCL_HUMAN	NCL	Nucleolin			3	3.4286328E7	MS/MS	STY:79.9663@VVVS(0.5000)PT(0.5000)K;
VVVSPTKK	VVVS[79.9663]PTKK	K	V	64	71	8	2	4S(79.9663)	sp|P19338|NUCL_HUMAN	P19338	NUCL_HUMAN	NCL	Nucleolin			2	2.1878542E7	MS/MS	STY:79.9663@VVVS(0.5000)PT(0.5000)KK;
WLDESDAEMELR	WLDES[79.9663]DAEMELR	R	A	110	121	12	2	5S(79.9663)	sp|Q9P035|HACD3_HUMAN	Q9P035	HACD3_HUMAN	HACD3	Very-long-chain (3R)-3-hydroxyacyl-CoA dehydratase 3			1	0	MS/MS	STY:79.9663@WLDES(1.0000)DAEMELR;
YDIPATAATATSPTPNPVPSVPANPPK	YDIPATAATAT[79.9663]SPTPNPVPSVPANPPK	K	S	400	426	27	3	11T(79.9663)	sp|P51610|HCFC1_HUMAN	P51610	HCFC1_HUMAN	HCFC1	Host cell factor 1			1	0	MS/MS	STY:79.9663@Y(0.1131)DIPAT(0.1361)AAT(0.0041)AT(0.2476)S(0.2476)PT(0.2476)PNPVPS(0.0039)VPANPPK;
YFEADPPGQVAASPDPTT	YFEADPPGQVAAS[79.9663]PDPTT	R	-	157	174	18	2	13S(79.9663)	sp|O43598|DNPH1_HUMAN	O43598	DNPH1_HUMAN	DNPH1	5-hydroxymethyl-dUMP N-hydrolase			1	0	MS/MS	STY:79.9663@Y(0.0780)FEADPPGQVAAS(0.5806)PDPT(0.0265)T(0.3149);
YGGSVGSQPPPVAPEPGPVPSSPSQEPPTK	YGGSVGSQPPPVAPEPGPVPSSPSQEPPT[79.9663]K	K	R	179	208	30	3	29T(79.9663)	sp|Q04323|UBXN1_HUMAN	Q04323	UBXN1_HUMAN	UBXN1	UBX domain-containing protein 1			3	1.6488318E7	MS/MS	STY:79.9663@Y(0.0174)GGS(0.0174)VGS(0.0174)QPPPVAPEPGPVPS(0.0089)S(0.0089)PS(0.0129)QEPPT(0.9172)K;
YGGSVGSQPPPVAPEPGPVPSSPSQEPPTK	YGGSVGSQPPPVAPEPGPVPS[79.9663]SPSQEPPTK	K	R	179	208	30	3	21S(79.9663)	sp|Q04323|UBXN1_HUMAN	Q04323	UBXN1_HUMAN	UBXN1	UBX domain-containing protein 1			1	1.6488318E7	MS/MS	STY:79.9663@Y(0.0099)GGS(0.0099)VGS(0.0099)QPPPVAPEPGPVPS(0.4737)S(0.4737)PS(0.0078)QEPPT(0.0152)K;
YGMGTSVER	YGMGT[79.9663]SVER	R	A	227	235	9	2	5T(79.9663)	sp|P08559|ODPA_HUMAN	P08559	ODPA_HUMAN	PDHA1	Pyruvate dehydrogenase E1 component subunit alpha, somatic form, mitochondrial			1	6746679	MS/MS	STY:79.9663@Y(0.0171)GMGT(0.4914)S(0.4914)VER;
YGPADVEDTTGSGATDSKDDDDIDLFGSDDEEESEEAK	YGPADVEDTTGSGATDSKDDDDIDLFGS[79.9663]DDEEESEEAK	K	R	79	116	38	3	28S(79.9663)	sp|P24534|EF1B_HUMAN	P24534	EF1B_HUMAN	EEF1B2	Elongation factor 1-beta			1	0	MS/MS	STY:79.9663@Y(0.0133)GPADVEDT(0.0496)T(0.0496)GS(0.0496)GAT(0.1687)DS(0.1687)KDDDDIDLFGS(0.4926)DDEEES(0.0078)EEAK;
YGPADVEDTTGSGATDSK	YGPADVEDT[79.9663]TGSGATDSK	K	D	79	96	18	2	9T(79.9663)	sp|P24534|EF1B_HUMAN	P24534	EF1B_HUMAN	EEF1B2	Elongation factor 1-beta			1	0	MS/MS	STY:79.9663@Y(0.0256)GPADVEDT(0.7288)T(0.0219)GS(0.0939)GAT(0.0939)DS(0.0360)K;
YNLDASEEEDSNK	YNLDASEEEDS[79.9663]NK	K	K	183	195	13	2	11S(79.9663)	sp|O95218|ZRAB2_HUMAN	O95218	ZRAB2_HUMAN	ZRANB2	Zinc finger Ran-binding domain-containing protein 2			1	4422068	MS/MS	STY:79.9663@Y(0.0523)NLDAS(0.0268)EEEDS(0.9209)NK;
YQDEVFGGFVTEPQEESEEEVEEPEER	YQDEVFGGFVTEPQEES[79.9663]EEEVEEPEER	R	Q	133	159	27	3	17S(79.9663)	sp|Q13283|G3BP1_HUMAN	Q13283	G3BP1_HUMAN	G3BP1	Ras GTPase-activating protein-binding protein 1			1	0	MS/MS	STY:79.9663@Y(0.1060)QDEVFGGFVT(0.0811)EPQEES(0.8129)EEEVEEPEER;
YFEGEFTGLPPALTPPAPHSLLTAR	Y[79.9663]FEGEFTGLPPALTPPAPHSLLTAR	R	Q	847	871	25	3	1Y(79.9663)	sp|Q6P5Z2|PKN3_HUMAN	Q6P5Z2	PKN3_HUMAN	PKN3	Serine/threonine-protein kinase N3			1	1.1254e+06	MS/MS	STY:79.9663@Y(0.2293)FEGEFT(0.2293)GLPPALT(0.2293)PPAPHS(0.1560)LLT(0.1560)AR;
YGLQDSDEEEEEHPSK	Y[79.9663]GLQDSDEEEEEHPSK	K	T	883	898	16	2	1Y(79.9663)	sp|P52948|NUP98_HUMAN	P52948	NUP98_HUMAN	NUP98	Nuclear pore complex protein Nup98-Nup96			1	0	MS/MS	STY:79.9663@Y(0.9246)GLQDS(0.0452)DEEEEEHPS(0.0302)K;
YGNPWEKSR	Y[79.9663]GNPWEKSR	R	P	186	194	9	2	1Y(79.9663)	sp|P06737|PYGL_HUMAN	P06737	PYGL_HUMAN	PYGL	Glycogen phosphorylase, liver form			1	2.01853e+06	MS/MS	STY:79.9663@Y(0.8388)GNPWEKS(0.1612)R;
AAAAAAAGDSDSWDADAFSVEDPVR	n[42.0106]AAAAAAAGDSDSWDADAFS[79.9663]VEDPVR	M	K	2	26	25	3	N-term(42.0106),19S(79.9663)	sp|O75822|EIF3J_HUMAN	O75822	EIF3J_HUMAN	EIF3J	Eukaryotic translation initiation factor 3 subunit J			1	1.947473E7	MS/MS	STY:79.9663@AAAAAAAGDS(0.0379)DS(0.0379)WDADAFS(0.9241)VEDPVR;n:42.0106@n(1.0000)AAAAAAAGDSDSWDADAFSVEDPVR;
AAAAAAAGDSDSWDADAFSVEDPVR	n[42.0106]AAAAAAAGDSDS[79.9663]WDADAFSVEDPVR	M	K	2	26	25	3	N-term(42.0106),12S(79.9663)	sp|O75822|EIF3J_HUMAN	O75822	EIF3J_HUMAN	EIF3J	Eukaryotic translation initiation factor 3 subunit J			1	1.947473E7	MS/MS	STY:79.9663@AAAAAAAGDS(0.1947)DS(0.7829)WDADAFS(0.0224)VEDPVR;n:42.0106@n(1.0000)AAAAAAAGDSDSWDADAFSVEDPVR;
AAAAAAAGDSDSWDADAFSVEDPVRK	n[42.0106]AAAAAAAGDSDS[79.9663]WDADAFSVEDPVRK	M	V	2	27	26	3	N-term(42.0106),12S(79.9663)	sp|O75822|EIF3J_HUMAN	O75822	EIF3J_HUMAN	EIF3J	Eukaryotic translation initiation factor 3 subunit J			2	4.1567092E7	MS/MS	STY:79.9663@AAAAAAAGDS(0.0283)DS(0.8594)WDADAFS(0.1123)VEDPVRK;n:42.0106@n(1.0000)AAAAAAAGDSDSWDADAFSVEDPVRK;
AAAAAAAGDSDSWDADAFSVEDPVRK	n[42.0106]AAAAAAAGDS[79.9663]DSWDADAFSVEDPVRK	M	V	2	27	26	3	N-term(42.0106),10S(79.9663)	sp|O75822|EIF3J_HUMAN	O75822	EIF3J_HUMAN	EIF3J	Eukaryotic translation initiation factor 3 subunit J			1	4.1567092E7	MS/MS	STY:79.9663@AAAAAAAGDS(0.9383)DS(0.0359)WDADAFS(0.0259)VEDPVRK;n:42.0106@n(1.0000)AAAAAAAGDSDSWDADAFSVEDPVRK;
AAAAAAGPSPGSGPGDSPEGPEGEAPER	n[42.0106]AAAAAAGPSPGSGPGDS[79.9663]PEGPEGEAPER	M	R	2	29	28	3	N-term(42.0106),17S(79.9663)	sp|Q9UID3|VPS51_HUMAN	Q9UID3	VPS51_HUMAN	VPS51	Vacuolar protein sorting-associated protein 51 homolog			1	0	MS/MS	STY:79.9663@AAAAAAGPS(0.0478)PGS(0.0630)GPGDS(0.8892)PEGPEGEAPER;n:42.0106@n(1.0000)AAAAAAGPSPGSGPGDSPEGPEGEAPER;
AAASVTPPGSLELLQPGFSK	n[42.0106]AAASVT[79.9663]PPGS[79.9663]LELLQPGFSK	M	T	2	21	20	3	N-term(42.0106),10S(79.9663),6T(79.9663)	sp|Q12933|TRAF2_HUMAN	Q12933	TRAF2_HUMAN	TRAF2	TNF receptor-associated factor 2			1	56476.1	MS/MS	STY:79.9663@AAAS(0.1679)VT(0.6107)PPGS(0.6107)LELLQPGFS(0.6107)K;n:42.0106@n(1.0000)AAASVTPPGSLELLQPGFSK;
AAASVTPPGSLELLQPGFSK	n[42.0106]AAAS[79.9663]VTPPGS[79.9663]LELLQPGFSK	M	T	2	21	20	3	N-term(42.0106),10S(79.9663),4S(79.9663)	sp|Q12933|TRAF2_HUMAN	Q12933	TRAF2_HUMAN	TRAF2	TNF receptor-associated factor 2			2	795244	MS/MS	STY:79.9663@AAAS(0.6341)VT(0.6341)PPGS(0.6905)LELLQPGFS(0.0414)K;n:42.0106@n(1.0000)AAASVTPPGSLELLQPGFSK;
AAASVTPPGSLELLQPGFSK	n[42.0106]AAAS[79.9663]VT[79.9663]PPGSLELLQPGFSK	M	T	2	21	20	3	N-term(42.0106),4S(79.9663),6T(79.9663)	sp|Q12933|TRAF2_HUMAN	Q12933	TRAF2_HUMAN	TRAF2	TNF receptor-associated factor 2			3	795244	MS/MS	STY:79.9663@AAAS(0.6433)VT(0.6433)PPGS(0.6433)LELLQPGFS(0.0700)K;n:42.0106@n(1.0000)AAASVTPPGSLELLQPGFSK;
AAAVAAAGAGEPQSPDELLPK	n[42.0106]AAAVAAAGAGEPQS[79.9663]PDELLPK	M	G	2	22	21	3	N-term(42.0106),14S(79.9663)	sp|Q9NS69|TOM22_HUMAN	Q9NS69	TOM22_HUMAN	TOMM22	Mitochondrial import receptor subunit TOM22 homolog			1	1.73985e+06	MS/MS	STY:79.9663@AAAVAAAGAGEPQS(1.0000)PDELLPK;n:42.0106@n(1.0000)AAAVAAAGAGEPQSPDELLPK;
AADVSVTHRPPLSPK	n[42.0106]AADVSVTHRPPLS[79.9663]PK	M	S	2	16	15	3	N-term(42.0106),13S(79.9663)	sp|Q8IY67|RAVR1_HUMAN	Q8IY67	RAVR1_HUMAN	RAVER1	Ribonucleoprotein PTB-binding 1			3	1.5980664E7	MS/MS	STY:79.9663@AADVS(0.0284)VT(0.0294)HRPPLS(0.9421)PK;n:42.0106@n(1.0000)AADVSVTHRPPLSPK;
AADVSVTHRPPLSPK	n[42.0106]AADVS[79.9663]VTHRPPLSPK	M	S	2	16	15	3	N-term(42.0106),5S(79.9663)	sp|Q8IY67|RAVR1_HUMAN	Q8IY67	RAVR1_HUMAN	RAVER1	Ribonucleoprotein PTB-binding 1			1	1.5980664E7	MS/MS	STY:79.9663@AADVS(0.9441)VT(0.0284)HRPPLS(0.0275)PK;n:42.0106@n(1.0000)AADVSVTHRPPLSPK;
AAQGAAAAVAAGTSGVAGEGEPGPGENAAAEGTAPSPGRVSPPTPAR	n[42.0106]AAQGAAAAVAAGTSGVAGEGEPGPGENAAAEGTAPS[79.9663]PGRVSPPTPAR	M	G	2	48	47	4	N-term(42.0106),36S(79.9663)	sp|Q9H7Z6|KAT8_HUMAN	Q9H7Z6	KAT8_HUMAN	KAT8	Histone acetyltransferase KAT8			1	0	MS/MS	STY:79.9663@AAQGAAAAVAAGT(0.1408)S(0.1408)GVAGEGEPGPGENAAAEGT(0.0767)APS(0.4255)PGRVS(0.1135)PPT(0.1027)PAR;n:42.0106@n(1.0000)AAQGAAAAVAAGTSGVAGEGEPGPGENAAAEGTAPSPGRVSPPTPAR;
AASAAAASAAAASAASGSPGPGEGSAGGEK	n[42.0106]AASAAAASAAAASAASGS[79.9663]PGPGEGSAGGEK	M	R	2	31	30	3	N-term(42.0106),18S(79.9663)	sp|Q13263|TIF1B_HUMAN	Q13263	TIF1B_HUMAN	TRIM28	Transcription intermediary factor 1-beta			2	1.27344776E8	MS/MS	STY:79.9663@AAS(0.0250)AAAAS(0.0572)AAAAS(0.0592)AAS(0.0131)GS(0.7295)PGPGEGS(0.1160)AGGEK;n:42.0106@n(1.0000)AASAAAASAAAASAASGSPGPGEGSAGGEK;
AASAAAASAAAASAASGSPGPGEGSAGGEK	n[42.0106]AASAAAASAAAASAAS[79.9663]GSPGPGEGSAGGEK	M	R	2	31	30	3	N-term(42.0106),16S(79.9663)	sp|Q13263|TIF1B_HUMAN	Q13263	TIF1B_HUMAN	TRIM28	Transcription intermediary factor 1-beta			3	1.27344776E8	MS/MS	STY:79.9663@AAS(0.4343)AAAAS(0.0190)AAAAS(0.0081)AAS(0.4974)GS(0.0091)PGPGEGS(0.0320)AGGEK;n:42.0106@n(1.0000)AASAAAASAAAASAASGSPGPGEGSAGGEK;
AASAAAASAAAASAASGSPGPGEGSAGGEK	n[42.0106]AASAAAAS[79.9663]AAAASAASGSPGPGEGSAGGEK	M	R	2	31	30	3	N-term(42.0106),8S(79.9663)	sp|Q13263|TIF1B_HUMAN	Q13263	TIF1B_HUMAN	TRIM28	Transcription intermediary factor 1-beta			1	1.27344776E8	MS/MS	STY:79.9663@AAS(0.0203)AAAAS(0.7021)AAAAS(0.0865)AAS(0.0865)GS(0.0865)PGPGEGS(0.0183)AGGEK;n:42.0106@n(1.0000)AASAAAASAAAASAASGSPGPGEGSAGGEK;
AASAAAASAAAASAASGSPGPGEGSAGGEK	n[42.0106]AAS[79.9663]AAAASAAAASAASGSPGPGEGSAGGEK	M	R	2	31	30	3	N-term(42.0106),3S(79.9663)	sp|Q13263|TIF1B_HUMAN	Q13263	TIF1B_HUMAN	TRIM28	Transcription intermediary factor 1-beta			2	1.27344776E8	MS/MS	STY:79.9663@AAS(0.9113)AAAAS(0.0106)AAAAS(0.0106)AAS(0.0115)GS(0.0221)PGPGEGS(0.0339)AGGEK;n:42.0106@n(1.0000)AASAAAASAAAASAASGSPGPGEGSAGGEK;
AASDTERDGLAPEK	n[42.0106]AAS[79.9663]DTERDGLAPEK	M	T	2	15	14	2	N-term(42.0106),3S(79.9663)	sp|Q7L4I2|RSRC2_HUMAN	Q7L4I2	RSRC2_HUMAN	RSRC2	Arginine/serine-rich coiled-coil protein 2			1	4.923e+06	MS/MS	STY:79.9663@AAS(0.5000)DT(0.5000)ERDGLAPEK;n:42.0106@n(1.0000)AASDTERDGLAPEK;
ADHSFSDGVPSDSVEAAK	n[42.0106]ADHS[79.9663]FSDGVPSDSVEAAK	M	N	2	19	18	2	N-term(42.0106),4S(79.9663)	sp|Q99733|NP1L4_HUMAN	Q99733	NP1L4_HUMAN	NAP1L4	Nucleosome assembly protein 1-like 4			1	1.73277e+06	MS/MS	STY:79.9663@ADHS(0.9409)FS(0.0216)DGVPS(0.0187)DS(0.0187)VEAAK;n:42.0106@n(1.0000)ADHSFSDGVPSDSVEAAK;
AEPSAATQSHSISSSSFGAEPSAPGGGGSPGACPALGTK	n[42.0106]AEPSAATQSHSISSSSFGAEPSAPGGGGS[79.9663]PGAC[57.0215]PALGTK	M	S	2	40	39	3,4	N-term(42.0106),29S(79.9663),33C(57.0215)	sp|O95197|RTN3_HUMAN	O95197	RTN3_HUMAN	RTN3	Reticulon-3			3	1.8012176E7	MS/MS	STY:79.9663@AEPS(0.0092)AAT(0.0092)QS(0.0092)HS(0.0094)IS(0.0073)S(0.0074)S(0.0074)S(0.0074)FGAEPS(0.0058)APGGGGS(0.9223)PGACPALGT(0.0052)K;n:42.0106@n(1.0000)AEPSAATQSHSISSSSFGAEPSAPGGGGSPGACPALGTK;
AHSPVAVQVPGMQNNIADPEELFTK	n[42.0106]AHS[79.9663]PVAVQVPGMQNNIADPEELFTK	M	L	2	26	25	3	N-term(42.0106),3S(79.9663)	sp|Q9P289|STK26_HUMAN	Q9P289	STK26_HUMAN	STK26	Serine/threonine-protein kinase 26			1	1236082	MS/MS	STY:79.9663@AHS(0.8619)PVAVQVPGMQNNIADPEELFT(0.1381)K;n:42.0106@n(1.0000)AHSPVAVQVPGMQNNIADPEELFTK;
AQVLHVPAPFPGTPGPASPPAFPAK	n[42.0106]AQVLHVPAPFPGTPGPAS[79.9663]PPAFPAK	M	D	2	26	25	3	N-term(42.0106),18S(79.9663)	sp|Q63ZY3|KANK2_HUMAN	Q63ZY3	KANK2_HUMAN	KANK2	KN motif and ankyrin repeat domain-containing protein 2			3	1.78801e+06	MS/MS	STY:79.9663@AQVLHVPAPFPGT(0.0605)PGPAS(0.9395)PPAFPAK;n:42.0106@n(1.0000)AQVLHVPAPFPGTPGPASPPAFPAK;
ASGEHSPGSGAAR	n[42.0106]ASGEHSPGS[79.9663]GAAR	M	R	2	14	13	2	N-term(42.0106),9S(79.9663)	sp|Q9H4A4|AMPB_HUMAN	Q9H4A4	AMPB_HUMAN	RNPEP	Aminopeptidase B			1	6717950	MS/MS	STY:79.9663@AS(0.0304)GEHS(0.0304)PGS(0.9393)GAAR;n:42.0106@n(1.0000)ASGEHSPGSGAAR;
ASLEVSRSPR	n[42.0106]ASLEVSRS[79.9663]PR	M	R	2	11	10	2	N-term(42.0106),8S(79.9663)	sp|O60762|DPM1_HUMAN	O60762	DPM1_HUMAN	DPM1	Dolichol-phosphate mannosyltransferase subunit 1			1	1.2820149E7	MS/MS	STY:79.9663@AS(0.0265)LEVS(0.0267)RS(0.9468)PR;n:42.0106@n(1.0000)ASLEVSRSPR;
ASLEVSRSPR	n[42.0106]ASLEVS[79.9663]RSPR	M	R	2	11	10	2	N-term(42.0106),6S(79.9663)	sp|O60762|DPM1_HUMAN	O60762	DPM1_HUMAN	DPM1	Dolichol-phosphate mannosyltransferase subunit 1			1	1.2820149E7	MS/MS	STY:79.9663@AS(0.0259)LEVS(0.9412)RS(0.0330)PR;n:42.0106@n(1.0000)ASLEVSRSPR;
ASGEHSPGSGAAR	n[42.0106]AS[79.9663]GEHSPGSGAAR	M	R	2	14	13	2	N-term(42.0106),2S(79.9663)	sp|Q9H4A4|AMPB_HUMAN	Q9H4A4	AMPB_HUMAN	RNPEP	Aminopeptidase B			1	6717950	MS/MS	STY:79.9663@AS(0.4915)GEHS(0.4915)PGS(0.0169)GAAR;n:42.0106@n(1.0000)ASGEHSPGSGAAR;
ASGVAVSDGVIK	n[42.0106]AS[79.9663]GVAVSDGVIK	M	V	2	13	12	2	N-term(42.0106),2S(79.9663)	sp|P23528|COF1_HUMAN	P23528	COF1_HUMAN	CFL1	Cofilin-1			11	3.45609664E8	MS/MS	STY:79.9663@AS(0.9496)GVAVS(0.0504)DGVIK;n:42.0106@n(1.0000)ASGVAVSDGVIK;
ASGVQVADEVCR	n[42.0106]AS[79.9663]GVQVADEVC[57.0215]R	M	I	2	13	12	2	N-term(42.0106),11C(57.0215),2S(79.9663)	sp|P60981|DEST_HUMAN	P60981	DEST_HUMAN	DSTN	Destrin			5	0	MS/MS	STY:79.9663@AS(1.0000)GVQVADEVCR;n:42.0106@n(1.0000)ASGVQVADEVCR;
ASGVTVNDEVIK	n[42.0106]AS[79.9663]GVTVNDEVIK	M	V	2	13	12	2	N-term(42.0106),2S(79.9663)	sp|Q9Y281|COF2_HUMAN	Q9Y281	COF2_HUMAN	CFL2	Cofilin-2			1	1.2535088E7	MS/MS	STY:79.9663@AS(0.9496)GVT(0.0504)VNDEVIK;n:42.0106@n(1.0000)ASGVTVNDEVIK;
ASLEVSRSPR	n[42.0106]AS[79.9663]LEVSRSPR	M	R	2	11	10	2	N-term(42.0106),2S(79.9663)	sp|O60762|DPM1_HUMAN	O60762	DPM1_HUMAN	DPM1	Dolichol-phosphate mannosyltransferase subunit 1			1	1.2820149E7	MS/MS	STY:79.9663@AS(0.9372)LEVS(0.0314)RS(0.0314)PR;n:42.0106@n(1.0000)ASLEVSRSPR;
MDLFGDLPEPERSPRPAAGK	n[42.0106]MDLFGDLPEPERS[79.9663]PRPAAGK	-	E	1	20	20	3	N-term(42.0106),13S(79.9663)	sp|Q9H0C8|ILKAP_HUMAN	Q9H0C8	ILKAP_HUMAN	ILKAP	Integrin-linked kinase-associated serine/threonine phosphatase 2C			1	1.91798e+06	MS/MS	STY:79.9663@MDLFGDLPEPERS(1.0000)PRPAAGK;n:42.0106@n(1.0000)MDLFGDLPEPERSPRPAAGK;
MDPNCSCAAGGSYACAGSCK	n[42.0106]MDPNC[57.0215]SC[57.0215]AAGGS[79.9663]YAC[57.0215]AGSC[57.0215]K	-	C	1	20	20	2	N-term(42.0106),12S(79.9663),15C(57.0215),19C(57.0215),5C(57.0215),7C(57.0215)	sp|P0DM35|M1BL1_HUMAN	P0DM35	M1BL1_HUMAN	MT1HL1	Metallothionein 1H-like protein 1			1	0	MS/MS	STY:79.9663@MDPNCS(0.0150)CAAGGS(0.4857)Y(0.4857)ACAGS(0.0136)CK;n:42.0106@n(1.0000)MDPNCSCAAGGSYACAGSCK;
MDSAGQDINLNSPNK	n[42.0106]MDSAGQDINLNS[79.9663]PNK	-	G	1	15	15	2	N-term(42.0106),12S(79.9663)	sp|O43399|TPD54_HUMAN	O43399	TPD54_HUMAN	TPD52L2	Tumor protein D54			2	0	MS/MS	STY:79.9663@MDS(0.0529)AGQDINLNS(0.9471)PNK;n:42.0106@n(1.0000)MDSAGQDINLNSPNK;
MEDLDQSPLVSSSDSPPRPQPAFK	n[42.0106]MEDLDQSPLVSSSDS[79.9663]PPRPQPAFK	-	Y	1	24	24	3	N-term(42.0106),15S(79.9663)	sp|Q9NQC3|RTN4_HUMAN	Q9NQC3	RTN4_HUMAN	RTN4	Reticulon-4			1	0	MS/MS	STY:79.9663@MEDLDQS(0.0218)PLVS(0.1206)S(0.1206)S(0.1206)DS(0.6164)PPRPQPAFK;n:42.0106@n(1.0000)MEDLDQSPLVSSSDSPPRPQPAFK;
MEDLDQSPLVSSSDSPPRPQPAFK	n[42.0106]MEDLDQSPLVSS[79.9663]SDSPPRPQPAFK	-	Y	1	24	24	3	N-term(42.0106),12S(79.9663)	sp|Q9NQC3|RTN4_HUMAN	Q9NQC3	RTN4_HUMAN	RTN4	Reticulon-4			1	0	MS/MS	STY:79.9663@MEDLDQS(0.0065)PLVS(0.0067)S(0.3289)S(0.3289)DS(0.3289)PPRPQPAFK;n:42.0106@n(1.0000)MEDLDQSPLVSSSDSPPRPQPAFK;
MNTAPSRPSPTR	n[42.0106]MNT[79.9663]APSRPSPTR	-	R	1	12	12	2	N-term(42.0106),3T(79.9663)	sp|Q9HCD5|NCOA5_HUMAN	Q9HCD5	NCOA5_HUMAN	NCOA5	Nuclear receptor coactivator 5			2	6862865	MS/MS	STY:79.9663@MNT(0.4883)APS(0.4883)RPS(0.0117)PT(0.0117)R;n:42.0106@n(1.0000)MNTAPSRPSPTR;
SDQEAKPSTEDLGDKK	n[42.0106]SDQEAKPS[79.9663]TEDLGDKK	M	E	2	17	16	2	N-term(42.0106),8S(79.9663)	sp|P63165|SUMO1_HUMAN	P63165	SUMO1_HUMAN	SUMO1	Small ubiquitin-related modifier 1			1	5.21021e+06	MS/MS	STY:79.9663@S(0.3031)DQEAKPS(0.3484)T(0.3484)EDLGDKK;n:42.0106@n(1.0000)SDQEAKPSTEDLGDKK;
SETAPAAPAAPAPAEKTPVK	n[42.0106]SETAPAAPAAPAPAEKT[79.9663]PVK	M	K	2	21	20	2,3	N-term(42.0106),17T(79.9663)	sp|P10412|H14_HUMAN	P10412	H14_HUMAN	H1-4	Histone H1.4			5	5.144458E7	MS/MS	STY:79.9663@S(0.0262)ET(0.0262)APAAPAAPAPAEKT(0.9477)PVK;n:42.0106@n(1.0000)SETAPAAPAAPAPAEKTPVK;
SETAPAAPAAPAPAEKTPVKK	n[42.0106]SETAPAAPAAPAPAEKT[79.9663]PVKK	M	K	2	22	21	3	N-term(42.0106),17T(79.9663)	sp|P10412|H14_HUMAN	P10412	H14_HUMAN	H1-4	Histone H1.4			2	9288746	MS/MS	STY:79.9663@S(0.0435)ET(0.0436)APAAPAAPAPAEKT(0.9129)PVKK;n:42.0106@n(1.0000)SETAPAAPAAPAPAEKTPVKK;
SETAPAETATPAPVEK	n[42.0106]SETAPAET[79.9663]ATPAPVEK	M	S	2	17	16	2	N-term(42.0106),8T(79.9663)	sp|P16401|H15_HUMAN	P16401	H15_HUMAN	H1-5	Histone H1.5			3	6.8058256E7	MS/MS	STY:79.9663@S(0.0292)ET(0.0292)APAET(0.9193)AT(0.0222)PAPVEK;n:42.0106@n(1.0000)SETAPAETATPAPVEK;
SETAPAETATPAPVEKSPAK	n[42.0106]SETAPAET[79.9663]ATPAPVEKSPAK	M	K	2	21	20	2	N-term(42.0106),8T(79.9663)	sp|P16401|H15_HUMAN	P16401	H15_HUMAN	H1-5	Histone H1.5			1	0	MS/MS	STY:79.9663@S(0.0100)ET(0.0100)APAET(0.3266)AT(0.3266)PAPVEKS(0.3266)PAK;n:42.0106@n(1.0000)SETAPAETATPAPVEKSPAK;
SETAPAAPAAAPPAEK	n[42.0106]SET[79.9663]APAAPAAAPPAEK	M	A	2	17	16	2	N-term(42.0106),3T(79.9663)	sp|P16403|H12_HUMAN	P16403	H12_HUMAN	H1-2	Histone H1.2			2	2.9466994E7	MS/MS	STY:79.9663@S(0.0582)ET(0.9418)APAAPAAAPPAEK;n:42.0106@n(1.0000)SETAPAAPAAAPPAEK;
SSSPVNVK	n[42.0106]SSS[79.9663]PVNVK	M	K	2	9	8	2	N-term(42.0106),3S(79.9663)	sp|Q00839|HNRPU_HUMAN	Q00839	HNRPU_HUMAN	HNRNPU	Heterogeneous nuclear ribonucleoprotein U			1	5823740	MS/MS	STY:79.9663@S(0.1958)S(0.1958)S(0.6084)PVNVK;n:42.0106@n(1.0000)SSSPVNVK;
SSSPVKR	n[42.0106]SS[79.9663]SPVKR	M	Q	2	8	7	2	N-term(42.0106),2S(79.9663)	sp|P37837|TALDO_HUMAN	P37837	TALDO_HUMAN	TALDO1	Transaldolase			1	0	MS/MS	STY:79.9663@S(0.0169)S(0.4915)S(0.4915)PVKR;n:42.0106@n(1.0000)SSSPVKR;
SSSPVNVK	n[42.0106]SS[79.9663]SPVNVK	M	K	2	9	8	2	N-term(42.0106),2S(79.9663)	sp|Q00839|HNRPU_HUMAN	Q00839	HNRPU_HUMAN	HNRNPU	Heterogeneous nuclear ribonucleoprotein U			2	3.2631344E7	MS/MS	STY:79.9663@S(0.0160)S(0.4920)S(0.4920)PVNVK;n:42.0106@n(1.0000)SSSPVNVK;
SDAAVDTSSEITTK	n[42.0106]S[79.9663]DAAVDTSSEITTK	M	D	2	15	14	2	N-term(42.0106),1S(79.9663)	sp|P06454|PTMA_HUMAN	P06454	PTMA_HUMAN	PTMA	Prothymosin alpha			2	1.0792564E7	MS/MS	STY:79.9663@S(0.9248)DAAVDT(0.0151)S(0.0151)S(0.0151)EIT(0.0149)T(0.0149)K;n:42.0106@n(1.0000)SDAAVDTSSEITTK;
SETAPAAPAAAPPAEK	n[42.0106]S[79.9663]ETAPAAPAAAPPAEK	M	A	2	17	16	2	N-term(42.0106),1S(79.9663)	sp|P16403|H12_HUMAN	P16403	H12_HUMAN	H1-2	Histone H1.2			7	8.932584E7	MS/MS	STY:79.9663@S(0.9437)ET(0.0563)APAAPAAAPPAEK;n:42.0106@n(1.0000)SETAPAAPAAAPPAEK;
SETAPAAPAAPAPAEK	n[42.0106]S[79.9663]ETAPAAPAAPAPAEK	M	T	2	17	16	2	N-term(42.0106),1S(79.9663)	sp|P10412|H14_HUMAN	P10412	H14_HUMAN	H1-4	Histone H1.4			7	7.3761232E7	MS/MS	STY:79.9663@S(0.5000)ET(0.5000)APAAPAAPAPAEK;n:42.0106@n(1.0000)SETAPAAPAAPAPAEK;
SETAPAAPAAPAPAEKTPVK	n[42.0106]S[79.9663]ETAPAAPAAPAPAEKTPVK	M	K	2	21	20	2	N-term(42.0106),1S(79.9663)	sp|P10412|H14_HUMAN	P10412	H14_HUMAN	H1-4	Histone H1.4			1	2.9973E7	MS/MS	STY:79.9663@S(0.4898)ET(0.4898)APAAPAAPAPAEKT(0.0204)PVK;n:42.0106@n(1.0000)SETAPAAPAAPAPAEKTPVK;
SETAPAETATPAPVEK	n[42.0106]S[79.9663]ETAPAETATPAPVEK	M	S	2	17	16	2	N-term(42.0106),1S(79.9663)	sp|P16401|H15_HUMAN	P16401	H15_HUMAN	H1-5	Histone H1.5			1	6.8058256E7	MS/MS	STY:79.9663@S(0.4883)ET(0.4883)APAET(0.0117)AT(0.0117)PAPVEK;n:42.0106@n(1.0000)SETAPAETATPAPVEK;
SETAPLAPTIPAPAEK	n[42.0106]S[79.9663]ETAPLAPTIPAPAEK	M	T	2	17	16	2	N-term(42.0106),1S(79.9663)	sp|P16402|H13_HUMAN	P16402	H13_HUMAN	H1-3	Histone H1.3			1	8397006	MS/MS	STY:79.9663@S(0.3333)ET(0.3333)APLAPT(0.3333)IPAPAEK;n:42.0106@n(1.0000)SETAPLAPTIPAPAEK;
SGEDEQQEQTIAEDLVVTK	n[42.0106]S[79.9663]GEDEQQEQTIAEDLVVTK	M	Y	2	20	19	2	N-term(42.0106),1S(79.9663)	sp|Q9UQ80|PA2G4_HUMAN	Q9UQ80	PA2G4_HUMAN	PA2G4	Proliferation-associated protein 2G4			1	1.4277643E7	MS/MS	STY:79.9663@S(0.9419)GEDEQQEQT(0.0307)IAEDLVVT(0.0274)K;n:42.0106@n(1.0000)SGEDEQQEQTIAEDLVVTK;
SIHFSSPVFTSR	n[42.0106]S[79.9663]IHFSSPVFTSR	M	S	2	13	12	2	N-term(42.0106),1S(79.9663)	sp|P08729|K2C7_HUMAN	P08729	K2C7_HUMAN	KRT7	Keratin, type II cytoskeletal 7			1	0	MS/MS	STY:79.9663@S(0.8616)IHFS(0.0123)S(0.0123)PVFT(0.0583)S(0.0554)R;n:42.0106@n(1.0000)SIHFSSPVFTSR;
SQGDSNPAAIPHAAEDIQGDDR	n[42.0106]S[79.9663]QGDSNPAAIPHAAEDIQGDDR	M	W	2	23	22	3	N-term(42.0106),1S(79.9663)	sp|P68402|PA1B2_HUMAN	P68402	PA1B2_HUMAN	PAFAH1B2	Platelet-activating factor acetylhydrolase IB subunit alpha2			1	1.93695e+06	MS/MS	STY:79.9663@S(0.9427)QGDS(0.0573)NPAAIPHAAEDIQGDDR;n:42.0106@n(1.0000)SQGDSNPAAIPHAAEDIQGDDR;
SSSPVNVK	n[42.0106]S[79.9663]SSPVNVK	M	K	2	9	8	2	N-term(42.0106),1S(79.9663)	sp|Q00839|HNRPU_HUMAN	Q00839	HNRPU_HUMAN	HNRNPU	Heterogeneous nuclear ribonucleoprotein U			3	3.2631344E7	MS/MS	STY:79.9663@S(0.4905)S(0.4905)S(0.0190)PVNVK;n:42.0106@n(1.0000)SSSPVNVK;

## Sheet: TiO2_2_MSFragger
Peptide Sequence	Modified Sequence	Prev AA	Next AA	Start	End	Peptide Length	Charges	Assigned Modifications	Protein	Protein ID	Entry Name	Gene	Protein Description	Mapped Genes	Mapped Proteins	TiO2_2 Spectral Count	TiO2_2 Intensity	TiO2_2 Match Type	TiO2_2 Localization
AADPPAENSSAPEAEQGGAE	AADPPAENSS[79.9663]APEAEQGGAE	K	-	305	324	20	2	10S(79.9663)	sp|P67809|YBOX1_HUMAN	P67809	YBOX1_HUMAN	YBX1	Y-box-binding protein 1			1	3.83079e+06	MS/MS	STY:79.9663@AADPPAENS(0.1407)S(0.8593)APEAEQGGAE;
AADPPAENSSAPEAEQGGAE	AADPPAENS[79.9663]SAPEAEQGGAE	K	-	305	324	20	2	9S(79.9663)	sp|P67809|YBOX1_HUMAN	P67809	YBOX1_HUMAN	YBX1	Y-box-binding protein 1			2	5263300	MS/MS	STY:79.9663@AADPPAENS(0.5000)S(0.5000)APEAEQGGAE;
AADSDDGAVSAPAASDGGVSK	AADS[79.9663]DDGAVSAPAASDGGVSK	M	S	2	22	21	2	4S(79.9663)	sp|Q96GM8|TOE1_HUMAN	Q96GM8	TOE1_HUMAN	TOE1	Target of EGR1 protein 1			2	4556110	MS/MS	STY:79.9663@AADS(0.9467)DDGAVS(0.0178)APAAS(0.0178)DGGVS(0.0178)K;
AAEEQGDDQDSEK	AAEEQGDDQDS[79.9663]EK	K	S	175	187	13	2	11S(79.9663)	sp|Q1KMD3|HNRL2_HUMAN	Q1KMD3	HNRL2_HUMAN	HNRNPUL2	Heterogeneous nuclear ribonucleoprotein U-like protein 2			1	0	MS/MS	STY:79.9663@AAEEQGDDQDS(1.0000)EK;
AAKNSEEEEEEK	AAKNS[79.9663]EEEEEEK	K	K	559	570	12	2	5S(79.9663)	sp|Q14978|NOLC1_HUMAN	Q14978	NOLC1_HUMAN	NOLC1	Nucleolar and coiled-body phosphoprotein 1			2	0	MS/MS	STY:79.9663@AAKNS(1.0000)EEEEEEK;
AALAPAKESPR	AALAPAKES[79.9663]PR	R	K	898	908	11	2	9S(79.9663)	sp|Q13428|TCOF_HUMAN	Q13428	TCOF_HUMAN	TCOF1	Treacle protein			1	0	MS/MS	STY:79.9663@AALAPAKES(1.0000)PR;
AALAPAKESPRK	AALAPAKES[79.9663]PRK	R	G	898	909	12	2	9S(79.9663)	sp|Q13428|TCOF_HUMAN	Q13428	TCOF_HUMAN	TCOF1	Treacle protein			1	280528	MS/MS	STY:79.9663@AALAPAKES(1.0000)PRK;
AAPEASSPPASPLQHLLPGK	AAPEASS[79.9663]PPASPLQHLLPGK	K	A	686	705	20	3	7S(79.9663)	sp|Q96TA1|NIBA2_HUMAN	Q96TA1	NIBA2_HUMAN	NIBAN2	Protein Niban 2			1	4.53697e+06	MS/MS	STY:79.9663@AAPEAS(0.0245)S(0.8205)PPAS(0.1550)PLQHLLPGK;
AAPEASSPPASPLQHLLPGK	AAPEASS[79.9663]PPAS[79.9663]PLQHLLPGK	K	A	686	705	20	3	11S(79.9663),7S(79.9663)	sp|Q96TA1|NIBA2_HUMAN	Q96TA1	NIBA2_HUMAN	NIBAN2	Protein Niban 2			1	1.1720838E7	MS/MS	STY:79.9663@AAPEAS(0.1040)S(0.9483)PPAS(0.9477)PLQHLLPGK;
AAPEASSPPASPLQHLLPGK	AAPEAS[79.9663]SPPASPLQHLLPGK	K	A	686	705	20	3	6S(79.9663)	sp|Q96TA1|NIBA2_HUMAN	Q96TA1	NIBA2_HUMAN	NIBAN2	Protein Niban 2			2	4.53697e+06	MS/MS	STY:79.9663@AAPEAS(0.7692)S(0.1154)PPAS(0.1154)PLQHLLPGK;
AAPEASSPPASPLQHLLPGK	AAPEAS[79.9663]SPPAS[79.9663]PLQHLLPGK	K	A	686	705	20	3	11S(79.9663),6S(79.9663)	sp|Q96TA1|NIBA2_HUMAN	Q96TA1	NIBA2_HUMAN	NIBAN2	Protein Niban 2			1	1.1720838E7	MS/MS	STY:79.9663@AAPEAS(0.6565)S(0.6565)PPAS(0.6870)PLQHLLPGK;
AASEQQADTSGGDSPK	AASEQQADT[79.9663]SGGDSPK	K	D	286	301	16	2	9T(79.9663)	sp|P85037|FOXK1_HUMAN	P85037	FOXK1_HUMAN	FOXK1	Forkhead box protein K1			1	405186	MS/MS	STY:79.9663@AAS(0.0209)EQQADT(0.4586)S(0.4586)GGDS(0.0620)PK;
AASLTEDR	AAS[79.9663]LTEDR	K	D	1207	1214	8	2	3S(79.9663)	sp|Q04637|IF4G1_HUMAN	Q04637	IF4G1_HUMAN	EIF4G1	Eukaryotic translation initiation factor 4 gamma 1			2	0	MS/MS	STY:79.9663@AAS(0.7077)LT(0.2923)EDR;
AASLTEDRDR	AAS[79.9663]LTEDRDR	K	G	1207	1216	10	2	3S(79.9663)	sp|Q04637|IF4G1_HUMAN	Q04637	IF4G1_HUMAN	EIF4G1	Eukaryotic translation initiation factor 4 gamma 1			2	2.1587408E7	MS/MS	STY:79.9663@AAS(0.9471)LT(0.0529)EDRDR;
AASPSPQSVR	AAS[79.9663]PSPQSVR	K	R	736	745	10	2	3S(79.9663)	sp|Q8IYB3|SRRM1_HUMAN	Q8IYB3	SRRM1_HUMAN	SRRM1	Serine/arginine repetitive matrix protein 1			3	1.3071732E7	MS/MS	STY:79.9663@AAS(0.9471)PS(0.0265)PQS(0.0265)VR;
AAVGQESPGGLEAGNAK	AAVGQES[79.9663]PGGLEAGNAK	R	A	1299	1315	17	2	7S(79.9663)	sp|Q29RF7|PDS5A_HUMAN	Q29RF7	PDS5A_HUMAN	PDS5A	Sister chromatid cohesion protein PDS5 homolog A			1	0	MS/MS	STY:79.9663@AAVGQES(1.0000)PGGLEAGNAK;
AAVTPGKK	AAVT[79.9663]PGKK	K	A	81	88	8	2	4T(79.9663)	sp|P19338|NUCL_HUMAN	P19338	NUCL_HUMAN	NCL	Nucleolin			1	0	MS/MS	STY:79.9663@AAVT(1.0000)PGKK;
AAVVTSPPPTTAPHK	AAVVTS[79.9663]PPPTTAPHK	R	E	7	21	15	2	6S(79.9663)	sp|P35611|ADDA_HUMAN	P35611	ADDA_HUMAN	ADD1	Alpha-adducin			1	2.0725e+06	MS/MS	STY:79.9663@AAVVT(0.0192)S(0.9282)PPPT(0.0265)T(0.0261)APHK;
ACASPSAQVEGSPVAGSDGSQPAVK	AC[57.0215]AS[79.9663]PSAQVEGSPVAGSDGSQPAVK	R	L	248	272	25	3	2C(57.0215),4S(79.9663)	sp|Q9UFC0|LRWD1_HUMAN	Q9UFC0	LRWD1_HUMAN	LRWD1	Leucine-rich repeat and WD repeat-containing protein 1			1	1.4505e+06	MS/MS	STY:79.9663@ACAS(0.2704)PS(0.2704)AQVEGS(0.2704)PVAGS(0.0136)DGS(0.1752)QPAVK;
ADAPDAGAQSDSELPSYHQNDVSLDR	ADAPDAGAQS[79.9663]DSELPSYHQNDVSLDR	R	G	1290	1315	26	3	10S(79.9663)	sp|Q92538|GBF1_HUMAN	Q92538	GBF1_HUMAN	GBF1	Golgi-specific brefeldin A-resistance guanine nucleotide exchange factor 1			1	8433865	MS/MS	STY:79.9663@ADAPDAGAQS(0.2000)DS(0.2000)ELPS(0.2000)Y(0.2000)HQNDVS(0.2000)LDR;
ADEASELACPTPK	ADEASELAC[57.0215]PT[79.9663]PK	K	E	2194	2206	13	2	11T(79.9663),9C(57.0215)	sp|P49327|FAS_HUMAN	P49327	FAS_HUMAN	FASN	Fatty acid synthase			2	3764373	MS/MS	STY:79.9663@ADEAS(0.0514)ELACPT(0.9486)PK;
ADEASELACPTPK	ADEAS[79.9663]ELAC[57.0215]PTPK	K	E	2194	2206	13	2	5S(79.9663),9C(57.0215)	sp|P49327|FAS_HUMAN	P49327	FAS_HUMAN	FASN	Fatty acid synthase			1	3764373	MS/MS	STY:79.9663@ADEAS(0.9329)ELACPT(0.0671)PK;
ADSDGAKPEPVAMAR	ADS[79.9663]DGAKPEPVAMAR	K	S	238	252	15	2	3S(79.9663)	sp|Q7Z4V5|HDGR2_HUMAN	Q7Z4V5	HDGR2_HUMAN	HDGFL2	Hepatoma-derived growth factor-related protein 2			2	1.81722E7	MS/MS	STY:79.9663@ADS(1.0000)DGAKPEPVAMAR;
AEAEAGSPRPDPR	AEAEAGS[79.9663]PRPDPR	R	E	2502	2514	13	2	7S(79.9663)	sp|P58107|EPIPL_HUMAN	P58107	EPIPL_HUMAN	EPPK1	Epiplakin			1	2.41343e+06	MS/MS	STY:79.9663@AEAEAGS(1.0000)PRPDPR;
AEDGATPSPSNETPK	AEDGATPSPSNET[79.9663]PK	K	K	138	152	15	2	13T(79.9663)	sp|P29966|MARCS_HUMAN	P29966	MARCS_HUMAN	MARCKS	Myristoylated alanine-rich C-kinase substrate			3	1.0047413E7	MS/MS	STY:79.9663@AEDGAT(0.0186)PS(0.0191)PS(0.0191)NET(0.9432)PK;
AEDGATPSPSNETPK	AEDGATPS[79.9663]PSNETPK	K	K	138	152	15	2	8S(79.9663)	sp|P29966|MARCS_HUMAN	P29966	MARCS_HUMAN	MARCKS	Myristoylated alanine-rich C-kinase substrate			3	3.1405584E7	MS/MS	STY:79.9663@AEDGAT(0.0331)PS(0.9274)PS(0.0180)NET(0.0215)PK;
AEDGATPSPSNETPK	AEDGAT[79.9663]PSPSNETPK	K	K	138	152	15	2	6T(79.9663)	sp|P29966|MARCS_HUMAN	P29966	MARCS_HUMAN	MARCKS	Myristoylated alanine-rich C-kinase substrate			8	3.1405584E7	MS/MS	STY:79.9663@AEDGAT(0.8290)PS(0.0570)PS(0.0570)NET(0.0570)PK;
AEDGATPSPSNETPKK	AEDGAT[79.9663]PSPSNETPKK	K	K	138	153	16	2	6T(79.9663)	sp|P29966|MARCS_HUMAN	P29966	MARCS_HUMAN	MARCKS	Myristoylated alanine-rich C-kinase substrate			2	3010936	MS/MS	STY:79.9663@AEDGAT(0.9312)PS(0.0229)PS(0.0229)NET(0.0229)PKK;
AEEDEILNRSPR	AEEDEILNRS[79.9663]PR	K	N	574	585	12	2	10S(79.9663)	sp|P27824|CALX_HUMAN	P27824	CALX_HUMAN	CANX	Calnexin			15	5.3833114E8	MS/MS	STY:79.9663@AEEDEILNRS(1.0000)PR;
AEEPPSQLDQDTQVQDMDEGSDDEEEGQK	AEEPPSQLDQDTQVQDMDEGS[79.9663]DDEEEGQK	K	V	339	367	29	3	21S(79.9663)	sp|Q15459|SF3A1_HUMAN	Q15459	SF3A1_HUMAN	SF3A1	Splicing factor 3A subunit 1			5	1.5974633E7	MS/MS	STY:79.9663@AEEPPS(0.0799)QLDQDT(0.0263)QVQDMDEGS(0.8938)DDEEEGQK;
AEGEPQEESPLK	AEGEPQEES[79.9663]PLK	K	S	169	180	12	2	9S(79.9663)	sp|Q9NYF8|BCLF1_HUMAN	Q9NYF8	BCLF1_HUMAN	BCLAF1	Bcl-2-associated transcription factor 1			3	9028367	MS/MS	STY:79.9663@AEGEPQEES(1.0000)PLK;
AESPESSAIESTQSTPQK	AES[79.9663]PESSAIESTQSTPQK	R	G	1356	1373	18	2,3	3S(79.9663)	sp|Q9NTI5|PDS5B_HUMAN	Q9NTI5	PDS5B_HUMAN	PDS5B	Sister chromatid cohesion protein PDS5 homolog B			4	9081288	MS/MS	STY:79.9663@AES(0.3256)PES(0.3256)S(0.3256)AIES(0.0058)T(0.0058)QS(0.0057)T(0.0057)PQK;
AETPTESVSEPEVATK	AETPTESVS[79.9663]EPEVATK	K	Q	193	208	16	2	9S(79.9663)	sp|P18858|DNLI1_HUMAN	P18858	DNLI1_HUMAN	LIG1	DNA ligase 1			1	1.57625e+06	MS/MS	STY:79.9663@AET(0.0145)PT(0.0145)ES(0.0145)VS(0.9431)EPEVAT(0.0134)K;
AETSEGSGSAPAVPEASASPK	AETSEGSGSAPAVPEAS[79.9663]ASPK	K	Q	62	82	21	2	17S(79.9663)	sp|P51608|MECP2_HUMAN	P51608	MECP2_HUMAN	MECP2	Methyl-CpG-binding protein 2			1	2556764	MS/MS	STY:79.9663@AET(0.0081)S(0.0081)EGS(0.0081)GS(0.0081)APAVPEAS(0.4837)AS(0.4837)PK;
AETPTESVSEPEVATK	AET[79.9663]PTESVSEPEVATK	K	Q	193	208	16	2	3T(79.9663)	sp|P18858|DNLI1_HUMAN	P18858	DNLI1_HUMAN	LIG1	DNA ligase 1			1	1.57625e+06	MS/MS	STY:79.9663@AET(0.4405)PT(0.4405)ES(0.0688)VS(0.0201)EPEVAT(0.0302)K;
AFAAVPTSHPPEDAPAQPPTPGPAASPEQLSFR	AFAAVPTSHPPEDAPAQPPTPGPAAS[79.9663]PEQLSFR	R	E	1323	1355	33	3	26S(79.9663)	sp|Q14160|SCRIB_HUMAN	Q14160	SCRIB_HUMAN	SCRIB	Protein scribble homolog			1	4498642	MS/MS	STY:79.9663@AFAAVPT(0.0095)S(0.0095)HPPEDAPAQPPT(0.0098)PGPAAS(0.4857)PEQLS(0.4857)FR;
AFAAVPTSHPPEDAPAQPPTPGPAASPEQLSFR	AFAAVPTSHPPEDAPAQPPT[79.9663]PGPAASPEQLSFR	R	E	1323	1355	33	3,4	20T(79.9663)	sp|Q14160|SCRIB_HUMAN	Q14160	SCRIB_HUMAN	SCRIB	Protein scribble homolog			2	8809937	MS/MS	STY:79.9663@AFAAVPT(0.0156)S(0.0156)HPPEDAPAQPPT(0.5876)PGPAAS(0.1982)PEQLS(0.1830)FR;
AFGPGLQGGSAGSPAR	AFGPGLQGGSAGS[79.9663]PAR	K	F	1072	1087	16	2	13S(79.9663)	sp|P21333|FLNA_HUMAN	P21333	FLNA_HUMAN	FLNA	Filamin-A			1	0	MS/MS	STY:79.9663@AFGPGLQGGS(0.0705)AGS(0.9295)PAR;
AFGPGLQGGSAGSPAR	AFGPGLQGGS[79.9663]AGSPAR	K	F	1072	1087	16	2	10S(79.9663)	sp|P21333|FLNA_HUMAN	P21333	FLNA_HUMAN	FLNA	Filamin-A			2	0	MS/MS	STY:79.9663@AFGPGLQGGS(0.9436)AGS(0.0564)PAR;
AGDLLEDSPK	AGDLLEDS[79.9663]PK	R	R	158	167	10	2	8S(79.9663)	sp|P51858|HDGF_HUMAN	P51858	HDGF_HUMAN	HDGF	Hepatoma-derived growth factor			12	1.69954848E8	MS/MS	STY:79.9663@AGDLLEDS(1.0000)PK;
AGDLLEDSPKRPK	AGDLLEDS[79.9663]PKRPK	R	E	158	170	13	3	8S(79.9663)	sp|P51858|HDGF_HUMAN	P51858	HDGF_HUMAN	HDGF	Hepatoma-derived growth factor			1	1.0275783E7	MS/MS	STY:79.9663@AGDLLEDS(1.0000)PKRPK;
AGEPNSPDAEEANSPDVTAGCDPAGVHPPR	AGEPNSPDAEEANSPDVT[79.9663]AGC[57.0215]DPAGVHPPR	R	-	738	767	30	3	18T(79.9663),21C(57.0215)	sp|Q08J23|NSUN2_HUMAN	Q08J23	NSUN2_HUMAN	NSUN2	RNA cytosine C(5)-methyltransferase NSUN2			1	5.2191984E7	MS/MS	STY:79.9663@AGEPNS(0.3406)PDAEEANS(0.0196)PDVT(0.6398)AGCDPAGVHPPR;
AGEPNSPDAEEANSPDVTAGCDPAGVHPPR	AGEPNSPDAEEANS[79.9663]PDVTAGC[57.0215]DPAGVHPPR	R	-	738	767	30	3	14S(79.9663),21C(57.0215)	sp|Q08J23|NSUN2_HUMAN	Q08J23	NSUN2_HUMAN	NSUN2	RNA cytosine C(5)-methyltransferase NSUN2			6	4.8051296E7	MS/MS	STY:79.9663@AGEPNS(0.0280)PDAEEANS(0.9414)PDVT(0.0306)AGCDPAGVHPPR;
AGEPNSPDAEEANSPDVTAGCDPAGVHPPR	AGEPNS[79.9663]PDAEEANSPDVTAGC[57.0215]DPAGVHPPR	R	-	738	767	30	3,4	21C(57.0215),6S(79.9663)	sp|Q08J23|NSUN2_HUMAN	Q08J23	NSUN2_HUMAN	NSUN2	RNA cytosine C(5)-methyltransferase NSUN2			10	6.4853144E7	MS/MS	STY:79.9663@AGEPNS(0.9245)PDAEEANS(0.0467)PDVT(0.0288)AGCDPAGVHPPR;
AGEPNSPDAEEANSPDVTAGCDPAGVHPPR	AGEPNS[79.9663]PDAEEANSPDVT[79.9663]AGC[57.0215]DPAGVHPPR	R	-	738	767	30	3	18T(79.9663),21C(57.0215),6S(79.9663)	sp|Q08J23|NSUN2_HUMAN	Q08J23	NSUN2_HUMAN	NSUN2	RNA cytosine C(5)-methyltransferase NSUN2			1	7773365	MS/MS	STY:79.9663@AGEPNS(0.9452)PDAEEANS(0.1090)PDVT(0.9458)AGCDPAGVHPPR;
AGEPNSPDAEEANSPDVTAGCDPAGVHPPR	AGEPNS[79.9663]PDAEEANS[79.9663]PDVTAGC[57.0215]DPAGVHPPR	R	-	738	767	30	3	14S(79.9663),21C(57.0215),6S(79.9663)	sp|Q08J23|NSUN2_HUMAN	Q08J23	NSUN2_HUMAN	NSUN2	RNA cytosine C(5)-methyltransferase NSUN2			1	7773365	MS/MS	STY:79.9663@AGEPNS(0.9446)PDAEEANS(0.9446)PDVT(0.1108)AGCDPAGVHPPR;
AGEQQLSEPEDMEMEAGDTDDPPR	AGEQQLS[79.9663]EPEDMEMEAGDTDDPPR	K	I	12	35	24	3	7S(79.9663)	sp|Q93009|UBP7_HUMAN	Q93009	UBP7_HUMAN	USP7	Ubiquitin carboxyl-terminal hydrolase 7			1	4679381	MS/MS	STY:79.9663@AGEQQLS(0.7229)EPEDMEMEAGDT(0.2771)DDPPR;
AGGSAALSPSK	AGGSAALS[79.9663]PSK	K	K	24	34	11	2	8S(79.9663)	sp|Q92522|H1X_HUMAN	Q92522	H1X_HUMAN	H1-10	Histone H1.10			6	4.8942608E7	MS/MS	STY:79.9663@AGGS(0.0264)AALS(0.9472)PS(0.0264)K;
AGGSAALSPSKK	AGGSAALS[79.9663]PSKK	K	R	24	35	12	2	8S(79.9663)	sp|Q92522|H1X_HUMAN	Q92522	H1X_HUMAN	H1-10	Histone H1.10			2	1.51301e+06	MS/MS	STY:79.9663@AGGS(0.0185)AALS(0.4907)PS(0.4907)KK;
AGGSAALSPSK	AGGS[79.9663]AALSPSK	K	K	24	34	11	2	4S(79.9663)	sp|Q92522|H1X_HUMAN	Q92522	H1X_HUMAN	H1-10	Histone H1.10			7	4.830212E7	MS/MS	STY:79.9663@AGGS(0.9441)AALS(0.0280)PS(0.0280)K;
AGLESGAEPGDGDSDTTK	AGLESGAEPGDGDSDT[79.9663]TK	K	K	481	498	18	2	16T(79.9663)	sp|O60832|DKC1_HUMAN	O60832	DKC1_HUMAN	DKC1	H/ACA ribonucleoprotein complex subunit DKC1			1	2.0775052E7	MS/MS	STY:79.9663@AGLES(0.0397)GAEPGDGDS(0.0517)DT(0.8898)T(0.0188)K;
AGLESGAEPGDGDSDTTK	AGLESGAEPGDGDS[79.9663]DTTK	K	K	481	498	18	2	14S(79.9663)	sp|O60832|DKC1_HUMAN	O60832	DKC1_HUMAN	DKC1	H/ACA ribonucleoprotein complex subunit DKC1			1	2.0775052E7	MS/MS	STY:79.9663@AGLES(0.0122)GAEPGDGDS(0.3293)DT(0.3293)T(0.3293)K;
AGLESGAEPGDGDSDTTKK	AGLESGAEPGDGDS[79.9663]DTTKK	K	K	481	499	19	2	14S(79.9663)	sp|O60832|DKC1_HUMAN	O60832	DKC1_HUMAN	DKC1	H/ACA ribonucleoprotein complex subunit DKC1			1	1.8313e+06	MS/MS	STY:79.9663@AGLES(0.0145)GAEPGDGDS(0.3285)DT(0.3285)T(0.3285)KK;
AGLESGAEPGDGDSDTTK	AGLES[79.9663]GAEPGDGDSDTTK	K	K	481	498	18	2	5S(79.9663)	sp|O60832|DKC1_HUMAN	O60832	DKC1_HUMAN	DKC1	H/ACA ribonucleoprotein complex subunit DKC1			1	1.499392E7	MS/MS	STY:79.9663@AGLES(0.9435)GAEPGDGDS(0.0193)DT(0.0186)T(0.0186)K;
AGMSSNQSISSPVLDAVPR	AGMSSNQSIS[79.9663]SPVLDAVPR	K	T	1394	1412	19	2	10S(79.9663)	sp|Q9UQ35|SRRM2_HUMAN	Q9UQ35	SRRM2_HUMAN	SRRM2	Serine/arginine repetitive matrix protein 2			1	3.21929e+06	MS/MS	STY:79.9663@AGMS(0.0207)S(0.0207)NQS(0.0097)IS(0.4744)S(0.4744)PVLDAVPR;
AGSNEDPILAPSGTPPPTIPPDETFGGR	AGSNEDPILAPSGT[79.9663]PPPTIPPDETFGGR	R	V	732	759	28	3	14T(79.9663)	sp|Q8IZL8|PELP1_HUMAN	Q8IZL8	PELP1_HUMAN	PELP1	Proline-, glutamic acid- and leucine-rich protein 1			1	2.9835142E7	MS/MS	STY:79.9663@AGS(0.0135)NEDPILAPS(0.0147)GT(0.9447)PPPT(0.0136)IPPDET(0.0136)FGGR;
AGSNEDPILAPSGTPPPTIPPDETFGGR	AGSNEDPILAPS[79.9663]GTPPPTIPPDETFGGR	R	V	732	759	28	3	12S(79.9663)	sp|Q8IZL8|PELP1_HUMAN	Q8IZL8	PELP1_HUMAN	PELP1	Proline-, glutamic acid- and leucine-rich protein 1			1	2.9835142E7	MS/MS	STY:79.9663@AGS(0.0657)NEDPILAPS(0.8844)GT(0.0140)PPPT(0.0181)IPPDET(0.0178)FGGR;
AHSSPASLQLGAVSPGTLTPTGVVSGPAATPTAQHLR	AHSSPASLQLGAVSPGTLTPTGVVSGPAAT[79.9663]PTAQHLR	R	Q	125	161	37	4	30T(79.9663)	sp|P46937|YAP1_HUMAN	P46937	YAP1_HUMAN	YAP1	Transcriptional coactivator YAP1			1	0	MS/MS	STY:79.9663@AHS(0.0922)S(0.0922)PAS(0.0922)LQLGAVS(0.0240)PGT(0.0069)LT(0.0040)PT(0.0040)GVVS(0.0040)GPAAT(0.3403)PT(0.3403)AQHLR;
AHSSPASLQLGAVSPGTLTPTGVVSGPAATPTAQHLR	AHSSPASLQLGAVS[79.9663]PGTLTPTGVVSGPAATPTAQHLR	R	Q	125	161	37	3	14S(79.9663)	sp|P46937|YAP1_HUMAN	P46937	YAP1_HUMAN	YAP1	Transcriptional coactivator YAP1			1	5.04629e+06	MS/MS	STY:79.9663@AHS(0.0874)S(0.0874)PAS(0.1190)LQLGAVS(0.4232)PGT(0.0222)LT(0.0222)PT(0.0138)GVVS(0.0138)GPAAT(0.1896)PT(0.0214)AQHLR;
AHSSPASLQLGAVSPGTLTPTGVVSGPAATPTAQHLR	AHS[79.9663]SPASLQLGAVSPGTLTPTGVVSGPAATPTAQHLR	R	Q	125	161	37	4	3S(79.9663)	sp|P46937|YAP1_HUMAN	P46937	YAP1_HUMAN	YAP1	Transcriptional coactivator YAP1			1	0	MS/MS	STY:79.9663@AHS(0.2252)S(0.2252)PAS(0.2252)LQLGAVS(0.0256)PGT(0.0186)LT(0.0157)PT(0.0157)GVVS(0.0654)GPAAT(0.0779)PT(0.1054)AQHLR;
AHTPTPGIYMGR	AHTPTPGIY[79.9663]MGR	R	P	200	211	12	3	9Y(79.9663)	sp|Q13595|TRA2A_HUMAN	Q13595	TRA2A_HUMAN	TRA2A	Transformer-2 protein homolog alpha			1	4.60275e+06	MS/MS	STY:79.9663@AHT(0.0422)PT(0.0791)PGIY(0.8787)MGR;
AHTPTPGIYMGR	AHT[79.9663]PTPGIYMGR	R	P	200	211	12	2,3	3T(79.9663)	sp|Q13595|TRA2A_HUMAN	Q13595	TRA2A_HUMAN	TRA2A	Transformer-2 protein homolog alpha			3	1.1953965E7	MS/MS	STY:79.9663@AHT(0.7546)PT(0.1227)PGIY(0.1227)MGR;
AIGGIILTASHNPGGPNGDFGIK	AIGGIILTAS[79.9663]HNPGGPNGDFGIK	K	F	108	130	23	3	10S(79.9663)	sp|P36871|PGM1_HUMAN	P36871	PGM1_HUMAN	PGM1	Phosphoglucomutase-1			1	1.5515267E7	MS/MS	STY:79.9663@AIGGIILT(0.0552)AS(0.9448)HNPGGPNGDFGIK;
AIGGIILTASHNPGGPNGDFGIK	AIGGIILT[79.9663]ASHNPGGPNGDFGIK	K	F	108	130	23	3	8T(79.9663)	sp|P36871|PGM1_HUMAN	P36871	PGM1_HUMAN	PGM1	Phosphoglucomutase-1			2	1.5515267E7	MS/MS	STY:79.9663@AIGGIILT(0.5000)AS(0.5000)HNPGGPNGDFGIK;
AIPGDQHPESPVHTEPMGIQGR	AIPGDQHPES[79.9663]PVHTEPMGIQGR	R	G	784	805	22	3	10S(79.9663)	sp|Q14676|MDC1_HUMAN	Q14676	MDC1_HUMAN	MDC1	Mediator of DNA damage checkpoint protein 1			4	5.92779e+06	MS/MS	STY:79.9663@AIPGDQHPES(0.9081)PVHT(0.0919)EPMGIQGR;
AIPVSPSAVEEDEDEDGHTVVATAR	AIPVS[79.9663]PSAVEEDEDEDGHTVVATAR	K	G	1613	1637	25	3	5S(79.9663)	sp|Q07157|ZO1_HUMAN	Q07157	ZO1_HUMAN	TJP1	Tight junction protein 1			1	1.88176e+06	MS/MS	STY:79.9663@AIPVS(0.4875)PS(0.4875)AVEEDEDEDGHT(0.0125)VVAT(0.0125)AR;
AITSLLGGGSPK	AITSLLGGGS[79.9663]PK	K	N	2649	2660	12	2	10S(79.9663)	sp|Q6KC79|NIPBL_HUMAN	Q6KC79	NIPBL_HUMAN	NIPBL	Nipped-B-like protein			1	6209552	MS/MS	STY:79.9663@AIT(0.0404)S(0.0775)LLGGGS(0.8821)PK;
AITSLLGGGSPK	AITS[79.9663]LLGGGSPK	K	N	2649	2660	12	2	4S(79.9663)	sp|Q6KC79|NIPBL_HUMAN	Q6KC79	NIPBL_HUMAN	NIPBL	Nipped-B-like protein			1	6209552	MS/MS	STY:79.9663@AIT(0.0175)S(0.4912)LLGGGS(0.4912)PK;
AKPAMPQDSVPSPR	AKPAMPQDSVPS[79.9663]PR	K	S	470	483	14	2	12S(79.9663)	sp|P53396|ACLY_HUMAN	P53396	ACLY_HUMAN	ACLY	ATP-citrate synthase			3	7224606	MS/MS	STY:79.9663@AKPAMPQDS(0.0530)VPS(0.9470)PR;
AKPAMPQDSVPSPR	AKPAMPQDS[79.9663]VPSPR	K	S	470	483	14	2	9S(79.9663)	sp|P53396|ACLY_HUMAN	P53396	ACLY_HUMAN	ACLY	ATP-citrate synthase			3	7224606	MS/MS	STY:79.9663@AKPAMPQDS(0.5000)VPS(0.5000)PR;
AKSPQPPVEEEDEHFDDTVVCLDTYNCDLHFK	AKS[79.9663]PQPPVEEEDEHFDDTVVC[57.0215]LDTYNC[57.0215]DLHFK	R	I	269	300	32	4	21C(57.0215),27C(57.0215),3S(79.9663)	sp|Q00839|HNRPU_HUMAN	Q00839	HNRPU_HUMAN	HNRNPU	Heterogeneous nuclear ribonucleoprotein U			2	2.8676294E7	MS/MS	STY:79.9663@AKS(0.9286)PQPPVEEEDEHFDDT(0.0288)VVCLDT(0.0213)Y(0.0213)NCDLHFK;
AKTPVTLK	AKTPVT[79.9663]LK	R	Q	206	213	8	2	6T(79.9663)	sp|P42167|LAP2B_HUMAN	P42167	LAP2B_HUMAN	TMPO	Lamina-associated polypeptide 2, isoforms beta/gamma			1	5378095	MS/MS	STY:79.9663@AKT(0.0574)PVT(0.9426)LK;
ALEEGDGSVSGSSPR	ALEEGDGSVS[79.9663]GSSPR	R	S	420	434	15	2	10S(79.9663)	sp|Q8N3X1|FNBP4_HUMAN	Q8N3X1	FNBP4_HUMAN	FNBP4	Formin-binding protein 4			1	0	MS/MS	STY:79.9663@ALEEGDGS(0.0127)VS(0.4866)GS(0.4866)S(0.0142)PR;
ALEYSNGIFDCQSPTSPFMGSLR	ALEYSNGIFDC[57.0215]QS[79.9663]PTSPFMGSLR	K	A	25	47	23	3	11C(57.0215),13S(79.9663)	sp|Q86W92|LIPB1_HUMAN	Q86W92	LIPB1_HUMAN	PPFIBP1	Liprin-beta-1			1	2.64114e+06	MS/MS	STY:79.9663@ALEY(0.0470)S(0.0470)NGIFDCQS(0.2997)PT(0.2997)S(0.2997)PFMGS(0.0069)LR;
ALPQTPRPR	ALPQT[79.9663]PRPR	K	S	1488	1496	9	2	5T(79.9663)	sp|Q9UQ35|SRRM2_HUMAN	Q9UQ35	SRRM2_HUMAN	SRRM2	Serine/arginine repetitive matrix protein 2			2	3614578	MS/MS	STY:79.9663@ALPQT(1.0000)PRPR;
ALPSLNTGSSSPR	ALPSLNT[79.9663]GSSSPR	R	G	317	329	13	2	7T(79.9663)	sp|O14545|TRAD1_HUMAN	O14545	TRAD1_HUMAN	TRAFD1	TRAF-type zinc finger domain-containing protein 1			2	2.25998e+06	MS/MS	STY:79.9663@ALPS(0.0066)LNT(0.2483)GS(0.2483)S(0.2483)S(0.2483)PR;
ALQAPHSPSK	ALQAPHSPS[79.9663]K	R	T	37	46	10	2	9S(79.9663)	sp|Q96AQ6|PBIP1_HUMAN	Q96AQ6	PBIP1_HUMAN	PBXIP1	Pre-B-cell leukemia transcription factor-interacting protein 1			1	1.22007e+06	MS/MS	STY:79.9663@ALQAPHS(0.0628)PS(0.9372)K;
ALQAPHSPSK	ALQAPHS[79.9663]PSK	R	T	37	46	10	2	7S(79.9663)	sp|Q96AQ6|PBIP1_HUMAN	Q96AQ6	PBIP1_HUMAN	PBXIP1	Pre-B-cell leukemia transcription factor-interacting protein 1			1	1.22007e+06	MS/MS	STY:79.9663@ALQAPHS(0.8802)PS(0.1198)K;
ALSSGGSITSPPLSPALPK	ALSSGGSITSPPLS[79.9663]PALPK	R	Y	17	35	19	2	14S(79.9663)	sp|Q6Y7W6|GGYF2_HUMAN	Q6Y7W6	GGYF2_HUMAN	GIGYF2	GRB10-interacting GYF protein 2			1	7132933	MS/MS	STY:79.9663@ALS(0.0860)S(0.0860)GGS(0.1812)IT(0.0081)S(0.0083)PPLS(0.6305)PALPK;
ALSSGGSITSPPLSPALPK	ALSSGGSITS[79.9663]PPLSPALPK	R	Y	17	35	19	2	10S(79.9663)	sp|Q6Y7W6|GGYF2_HUMAN	Q6Y7W6	GGYF2_HUMAN	GIGYF2	GRB10-interacting GYF protein 2			1	7132933	MS/MS	STY:79.9663@ALS(0.0382)S(0.0382)GGS(0.0103)IT(0.0103)S(0.8929)PPLS(0.0101)PALPK;
ALSPVIPLIPR	ALS[79.9663]PVIPLIPR	R	A	4736	4746	11	2	3S(79.9663)	sp|O14686|KMT2D_HUMAN	O14686	KMT2D_HUMAN	KMT2D	Histone-lysine N-methyltransferase 2D			1	0	MS/MS	STY:79.9663@ALS(1.0000)PVIPLIPR;
ALSSGGSITSPPLSPALPK	ALS[79.9663]SGGSITSPPLSPALPK	R	Y	17	35	19	2	3S(79.9663)	sp|Q6Y7W6|GGYF2_HUMAN	Q6Y7W6	GGYF2_HUMAN	GIGYF2	GRB10-interacting GYF protein 2			1	7132933	MS/MS	STY:79.9663@ALS(0.4832)S(0.4832)GGS(0.0088)IT(0.0084)S(0.0084)PPLS(0.0081)PALPK;
ALSSLHGDDQDSEDEVLTIPEVK	ALS[79.9663]SLHGDDQDSEDEVLTIPEVK	K	V	2398	2420	23	3	3S(79.9663)	sp|P11717|MPRI_HUMAN	P11717	MPRI_HUMAN	IGF2R	Cation-independent mannose-6-phosphate receptor			1	0	MS/MS	STY:79.9663@ALS(0.4678)S(0.4678)LHGDDQDS(0.0113)EDEVLT(0.0530)IPEVK;
ALVATPGKK	ALVAT[79.9663]PGKK	K	G	117	125	9	2	5T(79.9663)	sp|P19338|NUCL_HUMAN	P19338	NUCL_HUMAN	NCL	Nucleolin			5	2.49821e+06	MS/MS	STY:79.9663@ALVAT(1.0000)PGKK;
ALVEFESNPEETREPGSPPSVQR	ALVEFESNPEETREPGS[79.9663]PPSVQR	R	A	31	53	23	3	17S(79.9663)	sp|Q9H6F5|CCD86_HUMAN	Q9H6F5	CCD86_HUMAN	CCDC86	Coiled-coil domain-containing protein 86			3	2.313989E7	MS/MS	STY:79.9663@ALVEFES(0.0179)NPEET(0.0397)REPGS(0.9250)PPS(0.0174)VQR;
ALVEFESNPEETREPGSPPSVQR	ALVEFESNPEET[79.9663]REPGSPPSVQR	R	A	31	53	23	3	12T(79.9663)	sp|Q9H6F5|CCD86_HUMAN	Q9H6F5	CCD86_HUMAN	CCDC86	Coiled-coil domain-containing protein 86			1	1.6741082E7	MS/MS	STY:79.9663@ALVEFES(0.0190)NPEET(0.8881)REPGS(0.0464)PPS(0.0464)VQR;
ALVEFESNPEETREPGSPPSVQR	ALVEFES[79.9663]NPEETREPGSPPSVQR	R	A	31	53	23	3	7S(79.9663)	sp|Q9H6F5|CCD86_HUMAN	Q9H6F5	CCD86_HUMAN	CCDC86	Coiled-coil domain-containing protein 86			1	4130882	MS/MS	STY:79.9663@ALVEFES(0.9428)NPEET(0.0196)REPGS(0.0188)PPS(0.0188)VQR;
AMADELSEK	AMADELS[79.9663]EK	K	Q	31	39	9	2	7S(79.9663)	sp|Q03135|CAV1_HUMAN	Q03135	CAV1_HUMAN	CAV1	Caveolin-1			1	0	MS/MS	STY:79.9663@AMADELS(1.0000)EK;
AMLDQLMGTSR	AMLDQLMGT[79.9663]SR	R	D	9	19	11	2	9T(79.9663)	sp|Q9Y383|LC7L2_HUMAN	Q9Y383	LC7L2_HUMAN	LUC7L2	Putative RNA-binding protein Luc7-like 2			1	0	MS/MS	STY:79.9663@AMLDQLMGT(0.5000)S(0.5000)R;
ANEAGGQVGPEAPRPPETSPEMR	ANEAGGQVGPEAPRPPETS[79.9663]PEMR	R	S	267	289	23	3	19S(79.9663)	sp|Q8N3D4|EH1L1_HUMAN	Q8N3D4	EH1L1_HUMAN	EHBP1L1	EH domain-binding protein 1-like protein 1			1	5.05493e+06	MS/MS	STY:79.9663@ANEAGGQVGPEAPRPPET(0.0898)S(0.9102)PEMR;
ANEAGGQVGPEAPRPPETSPEMR	ANEAGGQVGPEAPRPPET[79.9663]SPEMR	R	S	267	289	23	3	18T(79.9663)	sp|Q8N3D4|EH1L1_HUMAN	Q8N3D4	EH1L1_HUMAN	EHBP1L1	EH domain-binding protein 1-like protein 1			1	5.05493e+06	MS/MS	STY:79.9663@ANEAGGQVGPEAPRPPET(0.5000)S(0.5000)PEMR;
APGASPGNPLSPSLSDKDR	APGASPGNPLSPSLS[79.9663]DKDR	K	G	1348	1366	19	2	15S(79.9663)	sp|Q7Z5J4|RAI1_HUMAN	Q7Z5J4	RAI1_HUMAN	RAI1	Retinoic acid-induced protein 1			1	0	MS/MS	STY:79.9663@APGAS(0.1825)PGNPLS(0.2892)PS(0.1683)LS(0.3601)DKDR;
APIDTSDVEEK	APIDT[79.9663]SDVEEK	K	A	301	311	11	2	5T(79.9663)	sp|Q06265|EXOS9_HUMAN	Q06265	EXOS9_HUMAN	EXOSC9	Exosome complex component RRP45			3	1.5043147E7	MS/MS	STY:79.9663@APIDT(0.5000)S(0.5000)DVEEK;
APQTSSSPPPVR	APQT[79.9663]SSSPPPVR	R	R	690	701	12	2	4T(79.9663)	sp|Q8IYB3|SRRM1_HUMAN	Q8IYB3	SRRM1_HUMAN	SRRM1	Serine/arginine repetitive matrix protein 1			1	5669561	MS/MS	STY:79.9663@APQT(0.2500)S(0.2500)S(0.2500)S(0.2500)PPPVR;
APSPAPSSVPLGSEK	APSPAPSSVPLGS[79.9663]EK	R	P	2399	2413	15	2	13S(79.9663)	sp|O75179|ANR17_HUMAN	O75179	ANR17_HUMAN	ANKRD17	Ankyrin repeat domain-containing protein 17			1	2.44505e+06	MS/MS	STY:79.9663@APS(0.4106)PAPS(0.0160)S(0.0160)VPLGS(0.5574)EK;
APSVANVGSHCDLSLK	APSVANVGS[79.9663]HC[57.0215]DLSLK	R	I	2150	2165	16	2	11C(57.0215),9S(79.9663)	sp|P21333|FLNA_HUMAN	P21333	FLNA_HUMAN	FLNA	Filamin-A			1	1.403391E7	MS/MS	STY:79.9663@APS(0.0273)VANVGS(0.9354)HCDLS(0.0373)LK;
APSVANVGSHCDLSLK	APS[79.9663]VANVGSHC[57.0215]DLSLK	R	I	2150	2165	16	2	11C(57.0215),3S(79.9663)	sp|P21333|FLNA_HUMAN	P21333	FLNA_HUMAN	FLNA	Filamin-A			4	1.403391E7	MS/MS	STY:79.9663@APS(0.9240)VANVGS(0.0383)HCDLS(0.0377)LK;
APVQPQQSPAAAPGGTDEK	APVQPQQSPAAAPGGT[79.9663]DEK	K	P	9	27	19	2	16T(79.9663)	sp|Q13200|PSMD2_HUMAN	Q13200	PSMD2_HUMAN	PSMD2	26S proteasome non-ATPase regulatory subunit 2			2	5775599	MS/MS	STY:79.9663@APVQPQQS(0.0726)PAAAPGGT(0.9274)DEK;
APVQPQQSPAAAPGGTDEK	APVQPQQS[79.9663]PAAAPGGTDEK	K	P	9	27	19	2	8S(79.9663)	sp|Q13200|PSMD2_HUMAN	Q13200	PSMD2_HUMAN	PSMD2	26S proteasome non-ATPase regulatory subunit 2			2	5775599	MS/MS	STY:79.9663@APVQPQQS(0.9470)PAAAPGGT(0.0530)DEK;
APVSSTESVIQSNTPTPPPSQPLNETAEEESR	APVSSTESVIQSNTPTPPPS[79.9663]QPLNETAEEESR	K	I	884	915	32	3	20S(79.9663)	sp|Q9HC35|EMAL4_HUMAN	Q9HC35	EMAL4_HUMAN	EML4	Echinoderm microtubule-associated protein-like 4			1	6342688	MS/MS	STY:79.9663@APVS(0.1606)S(0.1606)T(0.1606)ES(0.1606)VIQS(0.0172)NT(0.0179)PT(0.0332)PPPS(0.2837)QPLNET(0.0028)AEEES(0.0028)R;
AQAVSEEEEEEEGK	AQAVS[79.9663]EEEEEEEGK	K	S	78	91	14	2	5S(79.9663)	sp|Q9GZR7|DDX24_HUMAN	Q9GZR7	DDX24_HUMAN	DDX24	ATP-dependent RNA helicase DDX24			1	0	MS/MS	STY:79.9663@AQAVS(1.0000)EEEEEEEGK;
AQGEPVAGHESPK	AQGEPVAGHES[79.9663]PK	R	I	789	801	13	2,3	11S(79.9663)	sp|O94979|SC31A_HUMAN	O94979	SC31A_HUMAN	SEC31A	Protein transport protein Sec31A			8	1.2296699E7	MS/MS	STY:79.9663@AQGEPVAGHES(1.0000)PK;
AQGEPVAGHESPKIPYEK	AQGEPVAGHES[79.9663]PKIPYEK	R	Q	789	806	18	3	11S(79.9663)	sp|O94979|SC31A_HUMAN	O94979	SC31A_HUMAN	SEC31A	Protein transport protein Sec31A			4	5497290	MS/MS	STY:79.9663@AQGEPVAGHES(0.9443)PKIPY(0.0557)EK;
AQSSPAAPASLSAPEPASQAR	AQS[79.9663]SPAAPASLSAPEPASQAR	R	V	484	504	21	2	3S(79.9663)	sp|Q8WUI4|HDAC7_HUMAN	Q8WUI4	HDAC7_HUMAN	HDAC7	Histone deacetylase 7			1	3.6172e+06	MS/MS	STY:79.9663@AQS(0.3054)S(0.3054)PAAPAS(0.3054)LS(0.0623)APEPAS(0.0215)QAR;
AQTPPGPSLSGSK	AQTPPGPS[79.9663]LSGSK	K	S	1001	1013	13	2	8S(79.9663)	sp|Q9UQ35|SRRM2_HUMAN	Q9UQ35	SRRM2_HUMAN	SRRM2	Serine/arginine repetitive matrix protein 2			1	1.4585215E7	MS/MS	STY:79.9663@AQT(0.0181)PPGPS(0.3990)LS(0.3990)GS(0.1838)K;
AQTPPGPSLSGSK	AQT[79.9663]PPGPSLSGSK	K	S	1001	1013	13	2	3T(79.9663)	sp|Q9UQ35|SRRM2_HUMAN	Q9UQ35	SRRM2_HUMAN	SRRM2	Serine/arginine repetitive matrix protein 2			3	1.0985464E7	MS/MS	STY:79.9663@AQT(0.9414)PPGPS(0.0178)LS(0.0178)GS(0.0231)K;
ASAVSELSPR	ASAVSELS[79.9663]PR	R	E	236	245	10	2	8S(79.9663)	sp|Q9Y2W1|TR150_HUMAN	Q9Y2W1	TR150_HUMAN	THRAP3	Thyroid hormone receptor-associated protein 3			5	3.3195298E7	MS/MS	STY:79.9663@AS(0.0265)AVS(0.0266)ELS(0.9469)PR;
ASAVSELSPR	ASAVS[79.9663]ELSPR	R	E	236	245	10	2	5S(79.9663)	sp|Q9Y2W1|TR150_HUMAN	Q9Y2W1	TR150_HUMAN	THRAP3	Thyroid hormone receptor-associated protein 3			1	2.6727634E7	MS/MS	STY:79.9663@AS(0.0206)AVS(0.4897)ELS(0.4897)PR;
ASEDTTSGSPPKK	ASEDTTSGS[79.9663]PPKK	R	S	456	468	13	2	9S(79.9663)	sp|Q9BZZ5|API5_HUMAN	Q9BZZ5	API5_HUMAN	API5	Apoptosis inhibitor 5			1	5156154	MS/MS	STY:79.9663@AS(0.0135)EDT(0.0135)T(0.0135)S(0.0135)GS(0.9459)PPKK;
ASEDTTSGSPPKK	ASEDT[79.9663]TSGSPPKK	R	S	456	468	13	2	5T(79.9663)	sp|Q9BZZ5|API5_HUMAN	Q9BZZ5	API5_HUMAN	API5	Apoptosis inhibitor 5			1	5156154	MS/MS	STY:79.9663@AS(0.0493)EDT(0.2377)T(0.2377)S(0.2377)GS(0.2377)PPKK;
ASGQAFELILSPR	ASGQAFELILS[79.9663]PR	R	S	15	27	13	2	11S(79.9663)	sp|P16949|STMN1_HUMAN	P16949	STMN1_HUMAN	STMN1	Stathmin			1	1.5703451E7	MS/MS	STY:79.9663@AS(0.0760)GQAFELILS(0.9240)PR;
ASLGSLEGEAEAEASSPK	ASLGSLEGEAEAEAS[79.9663]SPK	K	G	5748	5765	18	2	15S(79.9663)	sp|Q09666|AHNK_HUMAN	Q09666	AHNK_HUMAN	AHNAK	Neuroblast differentiation-associated protein AHNAK			3	9644497	MS/MS	STY:79.9663@AS(0.0118)LGS(0.0118)LEGEAEAEAS(0.4882)S(0.4882)PK;
ASPAPGSGHPEGPGAHLDMNSLDR	ASPAPGSGHPEGPGAHLDMNS[79.9663]LDR	R	A	90	113	24	3	21S(79.9663)	sp|O94826|TOM70_HUMAN	O94826	TOM70_HUMAN	TOMM70	Mitochondrial import receptor subunit TOM70			1	6.74151e+06	MS/MS	STY:79.9663@AS(0.1843)PAPGS(0.2713)GHPEGPGAHLDMNS(0.5445)LDR;
ASPAPGSGHPEGPGAHLDMNSLDR	ASPAPGS[79.9663]GHPEGPGAHLDMNSLDR	R	A	90	113	24	3	7S(79.9663)	sp|O94826|TOM70_HUMAN	O94826	TOM70_HUMAN	TOMM70	Mitochondrial import receptor subunit TOM70			3	1.9670384E7	MS/MS	STY:79.9663@AS(0.0344)PAPGS(0.8958)GHPEGPGAHLDMNS(0.0698)LDR;
ASPATQPPPLLPPSATGPDATVGGPAPTPLLPPSATASVK	ASPATQPPPLLPPS[79.9663]ATGPDATVGGPAPTPLLPPSATASVK	R	M	57	96	40	3	14S(79.9663)	sp|Q07666|KHDR1_HUMAN	Q07666	KHDR1_HUMAN	KHDRBS1	KH domain-containing, RNA-binding, signal transduction-associated protein 1			1	2.204206E7	MS/MS	STY:79.9663@AS(0.0118)PAT(0.0135)QPPPLLPPS(0.3383)AT(0.3383)GPDAT(0.2105)VGGPAPT(0.0735)PLLPPS(0.0045)AT(0.0047)AS(0.0047)VK;
ASSHSSQTQGGGSVTK	ASSHSSQT[79.9663]QGGGSVTK	R	K	402	417	16	2	8T(79.9663)	sp|P02545|LMNA_HUMAN	P02545	LMNA_HUMAN	LMNA	Prelamin-A/C			1	5.0933e+06	MS/MS	STY:79.9663@AS(0.0628)S(0.0628)HS(0.0628)S(0.0628)QT(0.2495)QGGGS(0.2495)VT(0.2495)K;
ASSHSSQTQGGGSVTK	ASSHS[79.9663]SQTQGGGSVTK	R	K	402	417	16	2	5S(79.9663)	sp|P02545|LMNA_HUMAN	P02545	LMNA_HUMAN	LMNA	Prelamin-A/C			1	5.0933e+06	MS/MS	STY:79.9663@AS(0.0108)S(0.0108)HS(0.9348)S(0.0098)QT(0.0105)QGGGS(0.0105)VT(0.0129)K;
ASSLSESSPPK	ASSLSES[79.9663]SPPK	R	A	367	377	11	2	7S(79.9663)	sp|Q9UHB6|LIMA1_HUMAN	Q9UHB6	LIMA1_HUMAN	LIMA1	LIM domain and actin-binding protein 1			1	1.01404e+06	MS/MS	STY:79.9663@AS(0.0095)S(0.0095)LS(0.0102)ES(0.4854)S(0.4854)PPK;
ASSHSSQTQGGGSVTK	ASS[79.9663]HSSQTQGGGSVTK	R	K	402	417	16	2	3S(79.9663)	sp|P02545|LMNA_HUMAN	P02545	LMNA_HUMAN	LMNA	Prelamin-A/C			1	5.47237e+06	MS/MS	STY:79.9663@AS(0.0188)S(0.9199)HS(0.0123)S(0.0123)QT(0.0123)QGGGS(0.0123)VT(0.0123)K;
ASSLSESSPPK	ASS[79.9663]LSESSPPK	R	A	367	377	11	2	3S(79.9663)	sp|Q9UHB6|LIMA1_HUMAN	Q9UHB6	LIMA1_HUMAN	LIMA1	LIM domain and actin-binding protein 1			1	1.35659e+06	MS/MS	STY:79.9663@AS(0.0192)S(0.9073)LS(0.0245)ES(0.0245)S(0.0245)PPK;
ASVLDTSMSAGSGSPSK	ASVLDTSMSAGSGSPS[79.9663]K	R	T	510	526	17	2	16S(79.9663)	sp|Q9UPQ0|LIMC1_HUMAN	Q9UPQ0	LIMC1_HUMAN	LIMCH1	LIM and calponin homology domains-containing protein 1			1	4820283	MS/MS	STY:79.9663@AS(0.0089)VLDT(0.0089)S(0.0089)MS(0.0090)AGS(0.0158)GS(0.0158)PS(0.9325)K;
ASVSPMDEPVPDSESPIEK	ASVSPMDEPVPDS[79.9663]ESPIEK	R	V	1375	1393	19	2	13S(79.9663)	sp|P46821|MAP1B_HUMAN	P46821	MAP1B_HUMAN	MAP1B	Microtubule-associated protein 1B			2	1.86237e+06	MS/MS	STY:79.9663@AS(0.0292)VS(0.0292)PMDEPVPDS(0.9088)ES(0.0328)PIEK;
ASAPSPNAQVACDHCLK	AS[79.9663]APSPNAQVAC[57.0215]DHC[57.0215]LK	R	E	96	112	17	3	12C(57.0215),15C(57.0215),2S(79.9663)	sp|Q14258|TRI25_HUMAN	Q14258	TRI25_HUMAN	TRIM25	E3 ubiquitin/ISG15 ligase TRIM25			2	2.28442e+06	MS/MS	STY:79.9663@AS(0.9214)APS(0.0786)PNAQVACDHCLK;
ASASGSGAQVGGPISSGSSASSVTVTR	AS[79.9663]ASGSGAQVGGPISSGSSAS[79.9663]S[79.9663]VTVTR	K	S	598	624	27	3	21S(79.9663),22S(79.9663),2S(79.9663)	sp|P02545|LMNA_HUMAN	P02545	LMNA_HUMAN	LMNA	Prelamin-A/C			1	0	MS/MS	STY:79.9663@AS(0.4386)AS(0.2964)GS(0.1185)GAQVGGPIS(0.2704)S(0.2964)GS(0.0262)S(0.0262)AS(0.3819)S(0.3819)VT(0.3819)VT(0.3819)R;
ASAVSELSPR	AS[79.9663]AVSELSPR	R	E	236	245	10	2	2S(79.9663)	sp|Q9Y2W1|TR150_HUMAN	Q9Y2W1	TR150_HUMAN	THRAP3	Thyroid hormone receptor-associated protein 3			1	6.46766e+06	MS/MS	STY:79.9663@AS(0.3333)AVS(0.3333)ELS(0.3333)PR;
ASEDTTSGSPPK	AS[79.9663]EDTTSGSPPK	R	K	456	467	12	2	2S(79.9663)	sp|Q9BZZ5|API5_HUMAN	Q9BZZ5	API5_HUMAN	API5	Apoptosis inhibitor 5			1	924556	MS/MS	STY:79.9663@AS(0.2000)EDT(0.2000)T(0.2000)S(0.2000)GS(0.2000)PPK;
ASEDTTSGSPPKK	AS[79.9663]EDTTSGSPPKK	R	S	456	468	13	3	2S(79.9663)	sp|Q9BZZ5|API5_HUMAN	Q9BZZ5	API5_HUMAN	API5	Apoptosis inhibitor 5			1	0	MS/MS	STY:79.9663@AS(0.2000)EDT(0.2000)T(0.2000)S(0.2000)GS(0.2000)PPKK;
ASGDPGASGMSPR	AS[79.9663]GDPGASGMSPR	K	A	99	111	13	2	2S(79.9663)	sp|Q8NDT2|RB15B_HUMAN	Q8NDT2	RB15B_HUMAN	RBM15B	Putative RNA-binding protein 15B			1	1.7969e+06	MS/MS	STY:79.9663@AS(0.8945)GDPGAS(0.0659)GMS(0.0396)PR;
ASPAPGSGHPEGPGAHLDMNSLDR	AS[79.9663]PAPGSGHPEGPGAHLDMNSLDR	R	A	90	113	24	3	2S(79.9663)	sp|O94826|TOM70_HUMAN	O94826	TOM70_HUMAN	TOMM70	Mitochondrial import receptor subunit TOM70			12	2.550704E7	MS/MS	STY:79.9663@AS(0.9470)PAPGS(0.0265)GHPEGPGAHLDMNS(0.0265)LDR;
ASPATQPPPLLPPSATGPDATVGGPAPTPLLPPSATASVK	AS[79.9663]PATQPPPLLPPSATGPDATVGGPAPTPLLPPSATASVK	R	M	57	96	40	3,4	2S(79.9663)	sp|Q07666|KHDR1_HUMAN	Q07666	KHDR1_HUMAN	KHDRBS1	KH domain-containing, RNA-binding, signal transduction-associated protein 1			4	3.5241076E7	MS/MS	STY:79.9663@AS(0.8136)PAT(0.0076)QPPPLLPPS(0.0120)AT(0.0538)GPDAT(0.0512)VGGPAPT(0.0350)PLLPPS(0.0090)AT(0.0090)AS(0.0090)VK;
ASPSTAGETPSGVK	AS[79.9663]PSTAGETPSGVK	K	R	129	142	14	2	2S(79.9663)	sp|Q9UI10|EI2BD_HUMAN	Q9UI10	EI2BD_HUMAN	EIF2B4	Translation initiation factor eIF2B subunit delta			1	1.20938e+06	MS/MS	STY:79.9663@AS(0.3290)PS(0.3290)T(0.3290)AGET(0.0065)PS(0.0065)GVK;
ASSHSSQTQGGGSVTK	AS[79.9663]SHSSQTQGGGSVTK	R	K	402	417	16	2	2S(79.9663)	sp|P02545|LMNA_HUMAN	P02545	LMNA_HUMAN	LMNA	Prelamin-A/C			4	1.0565667E7	MS/MS	STY:79.9663@AS(0.4802)S(0.4802)HS(0.0080)S(0.0080)QT(0.0080)QGGGS(0.0078)VT(0.0078)K;
ASSLEDLVLK	AS[79.9663]SLEDLVLK	R	E	254	263	10	2	2S(79.9663)	sp|Q15477|SKI2_HUMAN	Q15477	SKI2_HUMAN	SKIC2	Superkiller complex protein 2			4	1.4188166E7	MS/MS	STY:79.9663@AS(0.9436)S(0.0564)LEDLVLK;
ATAPQTQHVSPMR	ATAPQTQHVS[79.9663]PMR	R	Q	124	136	13	2	10S(79.9663)	sp|P29692|EF1D_HUMAN	P29692	EF1D_HUMAN	EEF1D	Elongation factor 1-delta			11	1.09787728E8	MS/MS	STY:79.9663@AT(0.0265)APQT(0.0265)QHVS(0.9470)PMR;
ATAPQTQHVSPMR	ATAPQTQHVS[79.9663]PM[15.9949]R	R	Q	124	136	13	2	10S(79.9663),12M(15.9949)	sp|P29692|EF1D_HUMAN	P29692	EF1D_HUMAN	EEF1D	Elongation factor 1-delta			1	3.93025e+06	MS/MS	M:15.9949@ATAPQTQHVSPM(1.0000)R;STY:79.9663@AT(0.0311)APQT(0.0830)QHVS(0.8859)PMR;
ATAPQTQHVSPMR	ATAPQT[79.9663]QHVSPMR	R	Q	124	136	13	2,3	6T(79.9663)	sp|P29692|EF1D_HUMAN	P29692	EF1D_HUMAN	EEF1D	Elongation factor 1-delta			2	5.9064116E7	MS/MS	STY:79.9663@AT(0.0258)APQT(0.8773)QHVS(0.0969)PMR;
ATAPQTQHVSPMR	ATAPQT[79.9663]QHVSPM[15.9949]R	R	Q	124	136	13	2	12M(15.9949),6T(79.9663)	sp|P29692|EF1D_HUMAN	P29692	EF1D_HUMAN	EEF1D	Elongation factor 1-delta			2	3.93025e+06	MS/MS	M:15.9949@ATAPQTQHVSPM(1.0000)R;STY:79.9663@AT(0.0171)APQT(0.4914)QHVS(0.4914)PMR;
ATEDGEEDEVSAGEK	ATEDGEEDEVS[79.9663]AGEK	K	E	1425	1439	15	2	11S(79.9663)	sp|Q9BXW9|FACD2_HUMAN	Q9BXW9	FACD2_HUMAN	FANCD2	Fanconi anemia group D2 protein			1	0	MS/MS	STY:79.9663@AT(0.2622)EDGEEDEVS(0.7378)AGEK;
ATNESEDEIPQLVPIGK	ATNES[79.9663]EDEIPQLVPIGK	K	K	357	373	17	2,3	5S(79.9663)	sp|O76021|RL1D1_HUMAN	O76021	RL1D1_HUMAN	RSL1D1	Ribosomal L1 domain-containing protein 1			2	6.1867276E7	MS/MS	STY:79.9663@AT(0.0521)NES(0.9479)EDEIPQLVPIGK;
ATVTPSPVK	ATVTPS[79.9663]PVK	K	G	176	184	9	2	6S(79.9663)	sp|Q9H1E3|NUCKS_HUMAN	Q9H1E3	NUCKS_HUMAN	NUCKS1	Nuclear ubiquitous casein and cyclin-dependent kinase substrate 1			3	8.6342256E7	MS/MS	STY:79.9663@AT(0.0264)VT(0.0264)PS(0.9472)PVK;
ATVTPSPVK	ATVT[79.9663]PSPVK	K	G	176	184	9	2	4T(79.9663)	sp|Q9H1E3|NUCKS_HUMAN	Q9H1E3	NUCKS_HUMAN	NUCKS1	Nuclear ubiquitous casein and cyclin-dependent kinase substrate 1			2	8.6342256E7	MS/MS	STY:79.9663@AT(0.0163)VT(0.4919)PS(0.4919)PVK;
ATAPQTQHVSPMR	AT[79.9663]APQTQHVSPMR	R	Q	124	136	13	2	2T(79.9663)	sp|P29692|EF1D_HUMAN	P29692	EF1D_HUMAN	EEF1D	Elongation factor 1-delta			1	4.085534E7	MS/MS	STY:79.9663@AT(0.8142)APQT(0.0929)QHVS(0.0929)PMR;
ATNESEDEIPQLVPIGK	AT[79.9663]NESEDEIPQLVPIGK	K	K	357	373	17	2	2T(79.9663)	sp|O76021|RL1D1_HUMAN	O76021	RL1D1_HUMAN	RSL1D1	Ribosomal L1 domain-containing protein 1			1	5.8398032E7	MS/MS	STY:79.9663@AT(0.5000)NES(0.5000)EDEIPQLVPIGK;
ATSSTQSLAR	AT[79.9663]SSTQSLAR	R	L	1850	1859	10	2	2T(79.9663)	sp|Q14980|NUMA1_HUMAN	Q14980	NUMA1_HUMAN	NUMA1	Nuclear mitotic apparatus protein 1			2	0	MS/MS	STY:79.9663@AT(0.9436)S(0.0147)S(0.0145)T(0.0138)QS(0.0133)LAR;
ATVTPSPVK	AT[79.9663]VTPSPVK	K	G	176	184	9	2	2T(79.9663)	sp|Q9H1E3|NUCKS_HUMAN	Q9H1E3	NUCKS_HUMAN	NUCKS1	Nuclear ubiquitous casein and cyclin-dependent kinase substrate 1			2	8.6342256E7	MS/MS	STY:79.9663@AT(0.3333)VT(0.3333)PS(0.3333)PVK;
AVPMAPAPASPGSSNDSSAR	AVPMAPAPAS[79.9663]PGSSNDSSAR	K	S	750	769	20	2	10S(79.9663)	sp|Q66K74|MAP1S_HUMAN	Q66K74	MAP1S_HUMAN	MAP1S	Microtubule-associated protein 1S			1	0	MS/MS	STY:79.9663@AVPMAPAPAS(0.9295)PGS(0.0144)S(0.0195)NDS(0.0183)S(0.0183)AR;
AVTIANSPSK	AVTIANS[79.9663]PSK	K	P	197	206	10	2	7S(79.9663)	sp|Q8NEF9|SRFB1_HUMAN	Q8NEF9	SRFB1_HUMAN	SRFBP1	Serum response factor-binding protein 1			1	0	MS/MS	STY:79.9663@AVT(0.0163)IANS(0.4918)PS(0.4918)K;
AVTTVTQSTPVPGPSVPPPEELQVSPGPR	AVTTVTQSTPVPGPSVPPPEELQVS[79.9663]PGPR	R	Q	1483	1511	29	3	25S(79.9663)	sp|P51610|HCFC1_HUMAN	P51610	HCFC1_HUMAN	HCFC1	Host cell factor 1			1	0	MS/MS	STY:79.9663@AVT(0.0148)T(0.0148)VT(0.0149)QS(0.0093)T(0.0093)PVPGPS(0.0088)VPPPEELQVS(0.9282)PGPR;
AVVVSPKEENK	AVVVS[79.9663]PKEENK	R	A	336	346	11	2	5S(79.9663)	sp|O75909|CCNK_HUMAN	O75909	CCNK_HUMAN	CCNK	Cyclin-K			2	1.70262e+06	MS/MS	STY:79.9663@AVVVS(1.0000)PKEENK;
CDSSPDSAEDVRK	C[57.0215]DSSPDS[79.9663]AEDVRK	K	V	132	144	13	2	1C(57.0215),7S(79.9663)	sp|P02765|FETUA_HUMAN	P02765	FETUA_HUMAN	AHSG	Alpha-2-HS-glycoprotein			1	826757	MS/MS	STY:79.9663@CDS(0.0289)S(0.0289)PDS(0.9421)AEDVRK;
CDSSPDSAEDVRK	C[57.0215]DS[79.9663]SPDSAEDVRK	K	V	132	144	13	2	1C(57.0215),3S(79.9663)	sp|P02765|FETUA_HUMAN	P02765	FETUA_HUMAN	AHSG	Alpha-2-HS-glycoprotein			1	826757	MS/MS	STY:79.9663@CDS(0.3333)S(0.3333)PDS(0.3333)AEDVRK;
CGSGPVHISGQHLVAVEEDAESEDEEEEDVK	C[57.0215]GSGPVHISGQHLVAVEEDAES[79.9663]EDEEEEDVK	K	L	104	134	31	3,4	1C(57.0215),22S(79.9663)	sp|P06748|NPM_HUMAN	P06748	NPM_HUMAN	NPM1	Nucleophosmin			28	7.743332E7	MS/MS	STY:79.9663@CGS(0.0303)GPVHIS(0.0303)GQHLVAVEEDAES(0.9394)EDEEEEDVK;
CGSGPVHISGQHLVAVEEDAESEDEEEEDVK	C[57.0215]GSGPVHIS[79.9663]GQHLVAVEEDAESEDEEEEDVK	K	L	104	134	31	3,4	1C(57.0215),9S(79.9663)	sp|P06748|NPM_HUMAN	P06748	NPM_HUMAN	NPM1	Nucleophosmin			2	3.1153056E7	MS/MS	STY:79.9663@CGS(0.0326)GPVHIS(0.9397)GQHLVAVEEDAES(0.0276)EDEEEEDVK;
CSGPGLSPGMVR	C[57.0215]SGPGLS[79.9663]PGMVR	K	A	1453	1464	12	2	1C(57.0215),7S(79.9663)	sp|P21333|FLNA_HUMAN	P21333	FLNA_HUMAN	FLNA	Filamin-A			2	4.0592412E7	MS/MS	STY:79.9663@CS(0.0514)GPGLS(0.9486)PGMVR;
CSVSLSNVEAR	C[57.0215]SVS[79.9663]LSNVEAR	R	R	726	736	11	2	1C(57.0215),4S(79.9663)	sp|P47712|PA24A_HUMAN	P47712	PA24A_HUMAN	PLA2G4A	Cytosolic phospholipase A2			2	3.7870372E7	MS/MS	STY:79.9663@CS(0.0915)VS(0.8783)LS(0.0302)NVEAR;
CSGPGLSPGMVR	C[57.0215]S[79.9663]GPGLSPGMVR	K	A	1453	1464	12	2	1C(57.0215),2S(79.9663)	sp|P21333|FLNA_HUMAN	P21333	FLNA_HUMAN	FLNA	Filamin-A			2	4.0592412E7	MS/MS	STY:79.9663@CS(0.9463)GPGLS(0.0537)PGMVR;
CSVSLSNVEAR	C[57.0215]S[79.9663]VSLSNVEAR	R	R	726	736	11	2	1C(57.0215),2S(79.9663)	sp|P47712|PA24A_HUMAN	P47712	PA24A_HUMAN	PLA2G4A	Cytosolic phospholipase A2			1	2.8372194E7	MS/MS	STY:79.9663@CS(0.9448)VS(0.0276)LS(0.0276)NVEAR;
DAHDVSPTSTDTEAQLTVER	DAHDVS[79.9663]PTSTDTEAQLTVER	R	Q	289	308	20	3	6S(79.9663)	sp|Q8IVF2|AHNK2_HUMAN	Q8IVF2	AHNK2_HUMAN	AHNAK2	Protein AHNAK2			1	2.16753e+06	MS/MS	STY:79.9663@DAHDVS(0.2232)PT(0.2232)S(0.2232)T(0.2232)DT(0.1015)EAQLT(0.0058)VER;
DALGDSLQVPVSPSSTTSSR	DALGDSLQVPVSPSSTTS[79.9663]SR	R	C	372	391	20	2	18S(79.9663)	sp|Q9Y2D5|PLAK2_HUMAN	Q9Y2D5	PLAK2_HUMAN	PALM2AKAP2	PALM2-AKAP2 fusion protein			1	1.1645089E7	MS/MS	STY:79.9663@DALGDS(0.2468)LQVPVS(0.0099)PS(0.0099)S(0.0099)T(0.0099)T(0.0099)S(0.3519)S(0.3519)R;
DAQRLSPIPEEVPK	DAQRLS[79.9663]PIPEEVPK	K	S	599	612	14	2,3	6S(79.9663)	sp|Q96T23|RSF1_HUMAN	Q96T23	RSF1_HUMAN	RSF1	Remodeling and spacing factor 1			2	1.3720108E7	MS/MS	STY:79.9663@DAQRLS(1.0000)PIPEEVPK;
DDDDIDLFGSDDEEESEEAK	DDDDIDLFGS[79.9663]DDEEESEEAK	K	R	97	116	20	2,3	10S(79.9663)	sp|P24534|EF1B_HUMAN	P24534	EF1B_HUMAN	EEF1B2	Elongation factor 1-beta			3	0	MS/MS	STY:79.9663@DDDDIDLFGS(0.9444)DDEEES(0.0556)EEAK;
DDQEWESPSPPKPTVFISGVIAR	DDQEWESPSPPKPTVFIS[79.9663]GVIAR	K	G	43	65	23	3	18S(79.9663)	sp|P51397|DAP1_HUMAN	P51397	DAP1_HUMAN	DAP	Death-associated protein 1			1	6.96473e+06	MS/MS	STY:79.9663@DDQEWES(0.2136)PS(0.2136)PPKPT(0.2574)VFIS(0.3154)GVIAR;
DDQEWESPSPPKPTVFISGVIAR	DDQEWES[79.9663]PSPPKPTVFISGVIAR	K	G	43	65	23	3	7S(79.9663)	sp|P51397|DAP1_HUMAN	P51397	DAP1_HUMAN	DAP	Death-associated protein 1			3	6.20845e+06	MS/MS	STY:79.9663@DDQEWES(0.4866)PS(0.4866)PPKPT(0.0134)VFIS(0.0134)GVIAR;
DDSHSAEDSEDEK	DDSHS[79.9663]AEDSEDEK	K	E	71	83	13	2	5S(79.9663)	sp|Q9H1E3|NUCKS_HUMAN	Q9H1E3	NUCKS_HUMAN	NUCKS1	Nuclear ubiquitous casein and cyclin-dependent kinase substrate 1			1	0	MS/MS	STY:79.9663@DDS(0.0262)HS(0.7734)AEDS(0.2004)EDEK;
DEILPTTPISEQK	DEILPT[79.9663]TPISEQK	K	G	215	227	13	2	6T(79.9663)	sp|P23396|RS3_HUMAN	P23396	RS3_HUMAN	RPS3	Small ribosomal subunit protein uS3			1	1.9461142E7	MS/MS	STY:79.9663@DEILPT(0.4914)T(0.4914)PIS(0.0172)EQK;
DELHIVEAEAMNYEGSPIK	DELHIVEAEAMNYEGS[79.9663]PIK	K	V	55	73	19	3	16S(79.9663)	sp|P06748|NPM_HUMAN	P06748	NPM_HUMAN	NPM1	Nucleophosmin			2	1.5854175E7	MS/MS	STY:79.9663@DELHIVEAEAMNY(0.0515)EGS(0.9485)PIK;
DELHIVEAEAMNYEGSPIK	DELHIVEAEAMNY[79.9663]EGSPIK	K	V	55	73	19	2	13Y(79.9663)	sp|P06748|NPM_HUMAN	P06748	NPM_HUMAN	NPM1	Nucleophosmin			1	1.395434E7	MS/MS	STY:79.9663@DELHIVEAEAMNY(0.5000)EGS(0.5000)PIK;
DELTESPK	DELT[79.9663]ESPK	K	Y	229	236	8	2	4T(79.9663)	sp|Q8NC51|SERB1_HUMAN	Q8NC51	SERB1_HUMAN	SERBP1	SERPINE1 mRNA-binding protein 1			2	3.29772e+06	MS/MS	STY:79.9663@DELT(0.5000)ES(0.5000)PK;
DFQEYVEPGEDFPASPQRR	DFQEYVEPGEDFPAS[79.9663]PQRR	R	N	193	211	19	3	15S(79.9663)	sp|Q9Y6G9|DC1L1_HUMAN	Q9Y6G9	DC1L1_HUMAN	DYNC1LI1	Cytoplasmic dynein 1 light intermediate chain 1			1	3957958	MS/MS	STY:79.9663@DFQEY(0.1853)VEPGEDFPAS(0.8147)PQRR;
DFQEYVEPGEDFPASPQRR	DFQEY[79.9663]VEPGEDFPASPQRR	R	N	193	211	19	3	5Y(79.9663)	sp|Q9Y6G9|DC1L1_HUMAN	Q9Y6G9	DC1L1_HUMAN	DYNC1LI1	Cytoplasmic dynein 1 light intermediate chain 1			1	3957958	MS/MS	STY:79.9663@DFQEY(0.9052)VEPGEDFPAS(0.0948)PQRR;
DGQDAIAQSPEK	DGQDAIAQS[79.9663]PEK	K	E	281	292	12	2	9S(79.9663)	sp|Q9NWH9|SLTM_HUMAN	Q9NWH9	SLTM_HUMAN	SLTM	SAFB-like transcription modulator			3	2.14237e+06	MS/MS	STY:79.9663@DGQDAIAQS(1.0000)PEK;
DGQVINETSQHHDDLE	DGQVINETS[79.9663]QHHDDLE	R	-	451	466	16	2	9S(79.9663)	sp|P08670|VIME_HUMAN	P08670	VIME_HUMAN	VIM	Vimentin			1	1.79448e+06	MS/MS	STY:79.9663@DGQVINET(0.0575)S(0.9425)QHHDDLE;
DGQVINETSQHHDDLE	DGQVINET[79.9663]SQHHDDLE	R	-	451	466	16	3	8T(79.9663)	sp|P08670|VIME_HUMAN	P08670	VIME_HUMAN	VIM	Vimentin			1	3.69757e+06	MS/MS	STY:79.9663@DGQVINET(0.5000)S(0.5000)QHHDDLE;
DGTAPPPQSPGSPGTGQDEEWSDEESPRK	DGTAPPPQSPGSPGTGQDEEWS[79.9663]DEESPRK	R	A	333	361	29	3	22S(79.9663)	sp|Q9UKS6|PACN3_HUMAN	Q9UKS6	PACN3_HUMAN	PACSIN3	Protein kinase C and casein kinase substrate in neurons protein 3			1	2.26662e+06	MS/MS	STY:79.9663@DGT(0.0140)APPPQS(0.0598)PGS(0.0598)PGT(0.0797)GQDEEWS(0.7775)DEES(0.0093)PRK;
DGTAPPPQSPGSPGTGQDEEWSDEESPR	DGTAPPPQS[79.9663]PGSPGTGQDEEWSDEESPR	R	K	333	360	28	3	9S(79.9663)	sp|Q9UKS6|PACN3_HUMAN	Q9UKS6	PACN3_HUMAN	PACSIN3	Protein kinase C and casein kinase substrate in neurons protein 3			1	6.4693e+06	MS/MS	STY:79.9663@DGT(0.0101)APPPQS(0.8565)PGS(0.0116)PGT(0.0116)GQDEEWS(0.0551)DEES(0.0551)PR;
DHSPTPSVFNSDEER	DHSPTPS[79.9663]VFNSDEER	R	Y	490	504	15	3	7S(79.9663)	sp|Q6UN15|FIP1_HUMAN	Q6UN15	FIP1_HUMAN	FIP1L1	Pre-mRNA 3'-end-processing factor FIP1			1	3130954	MS/MS	STY:79.9663@DHS(0.0177)PT(0.0177)PS(0.9275)VFNS(0.0372)DEER;
DIDISSPEFK	DIDISS[79.9663]PEFK	K	I	172	181	10	2	6S(79.9663)	sp|Q09666|AHNK_HUMAN	Q09666	AHNK_HUMAN	AHNAK	Neuroblast differentiation-associated protein AHNAK			1	8127963	MS/MS	STY:79.9663@DIDIS(0.0530)S(0.9470)PEFK;
DIDISSPEFK	DIDIS[79.9663]SPEFK	K	I	172	181	10	2	5S(79.9663)	sp|Q09666|AHNK_HUMAN	Q09666	AHNK_HUMAN	AHNAK	Neuroblast differentiation-associated protein AHNAK			1	8127963	MS/MS	STY:79.9663@DIDIS(0.5000)S(0.5000)PEFK;
DISGPSPSK	DIS[79.9663]GPSPSK	K	K	82	90	9	2	3S(79.9663)	sp|Q96GX9|MTNB_HUMAN	Q96GX9	MTNB_HUMAN	APIP	Methylthioribulose-1-phosphate dehydratase			1	3.1143e+06	MS/MS	STY:79.9663@DIS(0.3333)GPS(0.3333)PS(0.3333)K;
DISGPSPSKK	DIS[79.9663]GPSPSKK	K	L	82	91	10	2	3S(79.9663)	sp|Q96GX9|MTNB_HUMAN	Q96GX9	MTNB_HUMAN	APIP	Methylthioribulose-1-phosphate dehydratase			1	0	MS/MS	STY:79.9663@DIS(0.4568)GPS(0.4568)PS(0.0863)KK;
DKDDQEWESPSPPKPTVFISGVIAR	DKDDQEWESPS[79.9663]PPKPTVFISGVIAR	K	G	41	65	25	3	11S(79.9663)	sp|P51397|DAP1_HUMAN	P51397	DAP1_HUMAN	DAP	Death-associated protein 1			3	2.6429292E7	MS/MS	STY:79.9663@DKDDQEWES(0.0177)PS(0.9365)PPKPT(0.0220)VFIS(0.0237)GVIAR;
DKDDQEWESPSPPKPTVFISGVIAR	DKDDQEWES[79.9663]PSPPKPTVFISGVIAR	K	G	41	65	25	3	9S(79.9663)	sp|P51397|DAP1_HUMAN	P51397	DAP1_HUMAN	DAP	Death-associated protein 1			3	2.6429292E7	MS/MS	STY:79.9663@DKDDQEWES(0.9385)PS(0.0212)PPKPT(0.0178)VFIS(0.0225)GVIAR;
DKEVSDDEAEEK	DKEVS[79.9663]DDEAEEK	R	E	227	238	12	2,3	5S(79.9663)	sp|P07900|HS90A_HUMAN	P07900	HS90A_HUMAN	HSP90AA1	Heat shock protein HSP 90-alpha			5	2.279113E7	MS/MS	STY:79.9663@DKEVS(1.0000)DDEAEEK;
DKSPVREPIDNLTPEER	DKSPVREPIDNLT[79.9663]PEER	K	D	134	150	17	2	13T(79.9663)	sp|Q14498|RBM39_HUMAN	Q14498	RBM39_HUMAN	RBM39	RNA-binding protein 39			1	3504673	MS/MS	STY:79.9663@DKS(0.0548)PVREPIDNLT(0.9452)PEER;
DKSPVREPIDNLTPEER	DKS[79.9663]PVREPIDNLTPEER	K	D	134	150	17	3	3S(79.9663)	sp|Q14498|RBM39_HUMAN	Q14498	RBM39_HUMAN	RBM39	RNA-binding protein 39			5	5.639006E7	MS/MS	STY:79.9663@DKS(0.9488)PVREPIDNLT(0.0512)PEER;
DLDEEGSEK	DLDEEGS[79.9663]EK	K	E	573	581	9	2	7S(79.9663)	sp|O43719|HTSF1_HUMAN	O43719	HTSF1_HUMAN	HTATSF1	17S U2 SnRNP complex component HTATSF1			2	1.1565855E7	MS/MS	STY:79.9663@DLDEEGS(1.0000)EK;
DLFDLNSSEEDDTEGFSER	DLFDLNS[79.9663]S[79.9663]EEDDTEGFSER	K	G	666	684	19	2	7S(79.9663),8S(79.9663)	sp|Q9Y3T9|NOC2L_HUMAN	Q9Y3T9	NOC2L_HUMAN	NOC2L	Nucleolar complex protein 2 homolog			2	0	MS/MS	STY:79.9663@DLFDLNS(0.8834)S(0.8834)EEDDT(0.1166)EGFS(0.1166)ER;
DLFDYSPPLHK	DLFDYS[79.9663]PPLHK	K	N	507	517	11	2	6S(79.9663)	sp|Q9NYF8|BCLF1_HUMAN	Q9NYF8	BCLF1_HUMAN	BCLAF1	Bcl-2-associated transcription factor 1			3	3.1322066E7	MS/MS	STY:79.9663@DLFDY(0.0519)S(0.9481)PPLHK;
DLFDYSPPLHK	DLFDY[79.9663]SPPLHK	K	N	507	517	11	2,3	5Y(79.9663)	sp|Q9NYF8|BCLF1_HUMAN	Q9NYF8	BCLF1_HUMAN	BCLAF1	Bcl-2-associated transcription factor 1			9	4.0268808E7	MS/MS	STY:79.9663@DLFDY(0.9474)S(0.0526)PPLHK;
DLLHPSPEEEK	DLLHPS[79.9663]PEEEK	K	R	6	16	11	2	6S(79.9663)	sp|P42677|RS27_HUMAN	P42677	RS27_HUMAN	RPS27	Small ribosomal subunit protein eS27			1	1.48622e+06	MS/MS	STY:79.9663@DLLHPS(1.0000)PEEEK;
DLPTIPGVTSPSSDEPPMEASQSHLRNSPEDK	DLPTIPGVTSPSSDEPPMEAS[79.9663]QSHLRNSPEDK	R	R	74	105	32	3,4	21S(79.9663)	sp|Q13541|4EBP1_HUMAN	Q13541	4EBP1_HUMAN	EIF4EBP1	Eukaryotic translation initiation factor 4E-binding protein 1			2	1.3380168E7	MS/MS	STY:79.9663@DLPT(0.0221)IPGVT(0.0303)S(0.0317)PS(0.0329)S(0.0329)DEPPMEAS(0.8058)QS(0.0068)HLRNS(0.0375)PEDK;
DLVQPDKPASPK	DLVQPDKPAS[79.9663]PK	R	F	506	517	12	2	10S(79.9663)	sp|Q6PJT7|ZC3HE_HUMAN	Q6PJT7	ZC3HE_HUMAN	ZC3H14	Zinc finger CCCH domain-containing protein 14			1	4.00998e+06	MS/MS	STY:79.9663@DLVQPDKPAS(1.0000)PK;
DMESPTK	DMES[79.9663]PTK	K	L	277	283	7	2	4S(79.9663)	sp|P27816|MAP4_HUMAN	P27816	MAP4_HUMAN	MAP4	Microtubule-associated protein 4			1	2.88987e+06	MS/MS	STY:79.9663@DMES(0.5000)PT(0.5000)K;
DPAQPMSPGEATQSGAR	DPAQPMSPGEAT[79.9663]QSGAR	R	P	5	21	17	2	12T(79.9663)	sp|Q9BQG0|MBB1A_HUMAN	Q9BQG0	MBB1A_HUMAN	MYBBP1A	Myb-binding protein 1A			1	5107544	MS/MS	STY:79.9663@DPAQPMS(0.0185)PGEAT(0.4907)QS(0.4907)GAR;
DPAQPMSPGEATQSGAR	DPAQPMS[79.9663]PGEATQSGAR	R	P	5	21	17	2	7S(79.9663)	sp|Q9BQG0|MBB1A_HUMAN	Q9BQG0	MBB1A_HUMAN	MYBBP1A	Myb-binding protein 1A			2	9379308	MS/MS	STY:79.9663@DPAQPMS(0.9449)PGEAT(0.0275)QS(0.0275)GAR;
DPSSGQEVATPPVPQLQVCEPK	DPSSGQEVAT[79.9663]PPVPQLQVC[57.0215]EPK	K	E	673	694	22	3	10T(79.9663),19C(57.0215)	sp|Q9UKV3|ACINU_HUMAN	Q9UKV3	ACINU_HUMAN	ACIN1	Apoptotic chromatin condensation inducer in the nucleus			1	802946	MS/MS	STY:79.9663@DPS(0.0318)S(0.0318)GQEVAT(0.9365)PPVPQLQVCEPK;
DPVSPASQK	DPVS[79.9663]PASQK	K	M	1098	1106	9	2	4S(79.9663)	sp|Q12888|TP53B_HUMAN	Q12888	TP53B_HUMAN	TP53BP1	TP53-binding protein 1			3	1.1164169E7	MS/MS	STY:79.9663@DPVS(0.9485)PAS(0.0515)QK;
DQDMSSPTTMK	DQDMSSPT[79.9663]TMK	R	K	307	317	11	2	8T(79.9663)	sp|O00712|NFIB_HUMAN	O00712	NFIB_HUMAN	NFIB	Nuclear factor 1 B-type			1	0	MS/MS	STY:79.9663@DQDMS(0.0123)S(0.0163)PT(0.4857)T(0.4857)MK;
DRQSPPPAK	DRQS[79.9663]PPPAK	K	R	839	847	9	2	4S(79.9663)	sp|Q86VM9|ZCH18_HUMAN	Q86VM9	ZCH18_HUMAN	ZC3H18	Zinc finger CCCH domain-containing protein 18			2	1.89223e+06	MS/MS	STY:79.9663@DRQS(1.0000)PPPAK;
DSSFTEVPRSPK	DSSFTEVPRS[79.9663]PK	R	H	236	247	12	2	10S(79.9663)	sp|O95425|SVIL_HUMAN	O95425	SVIL_HUMAN	SVIL	Supervillin			1	4.46339e+06	MS/MS	STY:79.9663@DS(0.2614)S(0.2909)FT(0.0102)EVPRS(0.4374)PK;
DSAAPSPIPGADNLSADPVVSPPTSIPFK	DS[79.9663]AAPSPIPGADNLSADPVVSPPTSIPFK	R	S	306	334	29	3	2S(79.9663)	sp|Q5T1M5|FKB15_HUMAN	Q5T1M5	FKB15_HUMAN	FKBP15	FK506-binding protein 15			1	0	MS/MS	STY:79.9663@DS(0.3174)AAPS(0.3174)PIPGADNLS(0.1217)ADPVVS(0.1124)PPT(0.0656)S(0.0656)IPFK;
DTSENADGQSDENK	DTSENADGQS[79.9663]DENK	K	D	757	770	14	2	10S(79.9663)	sp|P43243|MATR3_HUMAN	P43243	MATR3_HUMAN	MATR3	Matrin-3			1	0	MS/MS	STY:79.9663@DT(0.0559)S(0.0559)ENADGQS(0.8883)DENK;
DTSPSSGSAVSSSK	DT[79.9663]SPSSGSAVSSSK	R	V	203	216	14	2	2T(79.9663)	sp|Q8NEY8|PPHLN_HUMAN	Q8NEY8	PPHLN_HUMAN	PPHLN1	Periphilin-1			1	0	MS/MS	STY:79.9663@DT(0.4763)S(0.4763)PS(0.0068)S(0.0068)GS(0.0068)AVS(0.0068)S(0.0095)S(0.0107)K;
DVESPSWR	DVES[79.9663]PSWR	K	S	405	412	8	2	4S(79.9663)	sp|O00159|MYO1C_HUMAN	O00159	MYO1C_HUMAN	MYO1C	Unconventional myosin-Ic			1	0	MS/MS	STY:79.9663@DVES(0.5000)PS(0.5000)WR;
DVTPPPETEVVLIK	DVT[79.9663]PPPETEVVLIK	K	N	519	532	14	2	3T(79.9663)	sp|P27816|MAP4_HUMAN	P27816	MAP4_HUMAN	MAP4	Microtubule-associated protein 4			3	1.9338E7	MS/MS	STY:79.9663@DVT(0.8737)PPPET(0.1263)EVVLIK;
DVYLSPR	DVYLS[79.9663]PR	R	D	204	210	7	2	5S(79.9663)	sp|P38159|RBMX_HUMAN	P38159	RBMX_HUMAN	RBMX	RNA-binding motif protein, X chromosome	RBMXL1	sp|Q96E39|RMXL1_HUMAN	2	1.7120978E7	MS/MS	STY:79.9663@DVY(0.0513)LS(0.9487)PR;
DVYLSPR	DVY[79.9663]LSPR	R	D	204	210	7	2	3Y(79.9663)	sp|P38159|RBMX_HUMAN	P38159	RBMX_HUMAN	RBMX	RNA-binding motif protein, X chromosome	RBMXL1	sp|Q96E39|RMXL1_HUMAN	1	1.48463e+06	MS/MS	STY:79.9663@DVY(0.5000)LS(0.5000)PR;
DWEDDSDEDMSNFDR	DWEDDSDEDMS[79.9663]NFDR	K	F	108	122	15	2	11S(79.9663)	sp|Q15185|TEBP_HUMAN	Q15185	TEBP_HUMAN	PTGES3	Prostaglandin E synthase 3			1	5.05236e+06	MS/MS	STY:79.9663@DWEDDS(0.0542)DEDMS(0.9458)NFDR;
DWEDDSDEDMSNFDR	DWEDDS[79.9663]DEDMSNFDR	K	F	108	122	15	2	6S(79.9663)	sp|Q15185|TEBP_HUMAN	Q15185	TEBP_HUMAN	PTGES3	Prostaglandin E synthase 3			5	1.1541552E8	MS/MS	STY:79.9663@DWEDDS(0.9487)DEDMS(0.0513)NFDR;
DWEDDSDEDMSNFDR	DWEDDS[79.9663]DEDM[15.9949]SNFDR	K	F	108	122	15	2	10M(15.9949),6S(79.9663)	sp|Q15185|TEBP_HUMAN	Q15185	TEBP_HUMAN	PTGES3	Prostaglandin E synthase 3			2	0	MS/MS	M:15.9949@DWEDDSDEDM(1.0000)SNFDR;STY:79.9663@DWEDDS(0.9477)DEDMS(0.0523)NFDR;
DYDDMSPR	DYDDMS[79.9663]PR	R	R	279	286	8	2	6S(79.9663)	sp|P61978|HNRPK_HUMAN	P61978	HNRPK_HUMAN	HNRNPK	Heterogeneous nuclear ribonucleoprotein K			3	1.752281E7	MS/MS	STY:79.9663@DY(0.0514)DDMS(0.9486)PR;
DYEIESQNPLASPTNTLLGSAK	DYEIESQNPLAS[79.9663]PTNTLLGSAK	K	E	618	639	22	3	12S(79.9663)	sp|Q7Z417|NUFP2_HUMAN	Q7Z417	NUFP2_HUMAN	NUFIP2	FMR1-interacting protein NUFIP2			1	0	MS/MS	STY:79.9663@DY(0.0394)EIES(0.0394)QNPLAS(0.4859)PT(0.4081)NT(0.0139)LLGS(0.0133)AK;
EAEEGEDDRDSANGEDDS	EAEEGEDDRDSANGEDDS[79.9663]	K	-	289	306	18	2	18S(79.9663)	sp|P07910|HNRPC_HUMAN	P07910	HNRPC_HUMAN	HNRNPC	Heterogeneous nuclear ribonucleoproteins C1/C2			2	3.9907864E7	MS/MS	STY:79.9663@EAEEGEDDRDS(0.0996)ANGEDDS(0.9004);
EAEEGEDDRDSANGEDDS	EAEEGEDDRDS[79.9663]ANGEDDS	K	-	289	306	18	2	11S(79.9663)	sp|P07910|HNRPC_HUMAN	P07910	HNRPC_HUMAN	HNRNPC	Heterogeneous nuclear ribonucleoproteins C1/C2			17	7.029832E7	MS/MS	STY:79.9663@EAEEGEDDRDS(0.9450)ANGEDDS(0.0550);
EAESCDCLQGFQLTHSLGGGTGSGMGTLLISK	EAESC[57.0215]DC[57.0215]LQGFQLTHS[79.9663]LGGGTGSGMGTLLISK	K	I	123	154	32	3	16S(79.9663),5C(57.0215),7C(57.0215)	sp|P68371|TBB4B_HUMAN	P68371	TBB4B_HUMAN	TUBB4B	Tubulin beta-4B chain	TUBB, TUBB4A, TUBB8, TUBB8B	sp|A6NNZ2|TBB8B_HUMAN, sp|P04350|TBB4A_HUMAN, sp|P07437|TBB5_HUMAN, sp|Q3ZCM7|TBB8_HUMAN	1	0	MS/MS	STY:79.9663@EAES(0.0500)CDCLQGFQLT(0.0089)HS(0.4960)LGGGT(0.0068)GS(0.1333)GMGT(0.2849)LLIS(0.0201)K;
EAPAEGEAAEPGSPTAAEGEAASAASSTSSPK	EAPAEGEAAEPGSPTAAEGEAASAAS[79.9663]STSSPK	K	A	106	137	32	3	26S(79.9663)	sp|P29966|MARCS_HUMAN	P29966	MARCS_HUMAN	MARCKS	Myristoylated alanine-rich C-kinase substrate			1	8290509	MS/MS	STY:79.9663@EAPAEGEAAEPGS(0.0143)PT(0.0049)AAEGEAAS(0.0027)AAS(0.1956)S(0.1956)T(0.1956)S(0.1956)S(0.1956)PK;
EAPAEGEAAEPGSPTAAEGEAASAASSTSSPK	EAPAEGEAAEPGSPTAAEGEAAS[79.9663]AASSTSSPK	K	A	106	137	32	3	23S(79.9663)	sp|P29966|MARCS_HUMAN	P29966	MARCS_HUMAN	MARCKS	Myristoylated alanine-rich C-kinase substrate			1	8290509	MS/MS	STY:79.9663@EAPAEGEAAEPGS(0.0085)PT(0.0085)AAEGEAAS(0.9442)AAS(0.0077)S(0.0077)T(0.0077)S(0.0077)S(0.0077)PK;
EAPAEGEAAEPGSPTAAEGEAASAASSTSSPK	EAPAEGEAAEPGS[79.9663]PTAAEGEAASAASSTSSPK	K	A	106	137	32	3	13S(79.9663)	sp|P29966|MARCS_HUMAN	P29966	MARCS_HUMAN	MARCKS	Myristoylated alanine-rich C-kinase substrate			1	8290509	MS/MS	STY:79.9663@EAPAEGEAAEPGS(0.9290)PT(0.0093)AAEGEAAS(0.0085)AAS(0.0079)S(0.0079)T(0.0079)S(0.0148)S(0.0148)PK;
EARSPQPNK	EARS[79.9663]PQPNK	R	R	672	680	9	2	4S(79.9663)	sp|Q8IYB3|SRRM1_HUMAN	Q8IYB3	SRRM1_HUMAN	SRRM1	Serine/arginine repetitive matrix protein 1			1	0	MS/MS	STY:79.9663@EARS(1.0000)PQPNK;
EAYSGCSGPVDSECPPPPSSPVHK	EAYSGC[57.0215]S[79.9663]GPVDSEC[57.0215]PPPPSSPVHK	K	A	246	269	24	3	14C(57.0215),6C(57.0215),7S(79.9663)	sp|Q8N556|AFAP1_HUMAN	Q8N556	AFAP1_HUMAN	AFAP1	Actin filament-associated protein 1			1	8188362	MS/MS	STY:79.9663@EAY(0.0078)S(0.0101)GCS(0.4476)GPVDS(0.4476)ECPPPPS(0.0434)S(0.0434)PVHK;
EAYSGCSGPVDSECPPPPSSPVHK	EAY[79.9663]SGC[57.0215]SGPVDSEC[57.0215]PPPPSSPVHK	K	A	246	269	24	3	14C(57.0215),3Y(79.9663),6C(57.0215)	sp|Q8N556|AFAP1_HUMAN	Q8N556	AFAP1_HUMAN	AFAP1	Actin filament-associated protein 1			1	8188362	MS/MS	STY:79.9663@EAY(0.1942)S(0.1942)GCS(0.1942)GPVDS(0.1926)ECPPPPS(0.1926)S(0.0320)PVHK;
ECINAAPDSPSK	EC[57.0215]INAAPDS[79.9663]PSK	K	Q	109	120	12	2	2C(57.0215),9S(79.9663)	sp|Q7Z569|BRAP_HUMAN	Q7Z569	BRAP_HUMAN	BRAP	BRCA1-associated protein			1	0	MS/MS	STY:79.9663@ECINAAPDS(0.5000)PS(0.5000)K;
EDEISPPPPNPVVK	EDEIS[79.9663]PPPPNPVVK	R	G	79	92	14	2	5S(79.9663)	sp|P10644|KAP0_HUMAN	P10644	KAP0_HUMAN	PRKAR1A	cAMP-dependent protein kinase type I-alpha regulatory subunit			3	9785937	MS/MS	STY:79.9663@EDEIS(1.0000)PPPPNPVVK;
EDILENEDEQNSPPKK	EDILENEDEQNS[79.9663]PPKK	K	G	1272	1287	16	3	12S(79.9663)	sp|Q9NTI5|PDS5B_HUMAN	Q9NTI5	PDS5B_HUMAN	PDS5B	Sister chromatid cohesion protein PDS5 homolog B			2	3.24426e+06	MS/MS	STY:79.9663@EDILENEDEQNS(1.0000)PPKK;
EDKPPLAPSGGTEGPEQPPPPCPSQTGSPPVGLIK	EDKPPLAPSGGTEGPEQPPPPC[57.0215]PS[79.9663]QTGSPPVGLIK	K	G	607	641	35	3,4	22C(57.0215),24S(79.9663)	sp|Q8WWM7|ATX2L_HUMAN	Q8WWM7	ATX2L_HUMAN	ATXN2L	Ataxin-2-like protein			4	1.4030135E7	MS/MS	STY:79.9663@EDKPPLAPS(0.0133)GGT(0.0133)EGPEQPPPPCPS(0.9294)QT(0.0220)GS(0.0220)PPVGLIK;
EDKPPLAPSGGTEGPEQPPPPCPSQTGSPPVGLIK	EDKPPLAPS[79.9663]GGTEGPEQPPPPC[57.0215]PSQTGSPPVGLIK	K	G	607	641	35	4	22C(57.0215),9S(79.9663)	sp|Q8WWM7|ATX2L_HUMAN	Q8WWM7	ATX2L_HUMAN	ATXN2L	Ataxin-2-like protein			1	0	MS/MS	STY:79.9663@EDKPPLAPS(0.3791)GGT(0.3791)EGPEQPPPPCPS(0.0870)QT(0.0774)GS(0.0774)PPVGLIK;
EDSGTFSLGK	EDSGTFS[79.9663]LGK	R	M	16	25	10	2	7S(79.9663)	sp|O75569|PRKRA_HUMAN	O75569	PRKRA_HUMAN	PRKRA	Interferon-inducible double-stranded RNA-dependent protein kinase activator A			1	3464885	MS/MS	STY:79.9663@EDS(0.0634)GT(0.0634)FS(0.8733)LGK;
EEAPASPLRPLYPQISPLK	EEAPASPLRPLYPQIS[79.9663]PLK	K	I	208	226	19	3	16S(79.9663)	sp|P85037|FOXK1_HUMAN	P85037	FOXK1_HUMAN	FOXK1	Forkhead box protein K1			1	5024668	MS/MS	STY:79.9663@EEAPAS(0.0484)PLRPLY(0.0269)PQIS(0.9248)PLK;
EEASDDDMEGDEAVVR	EEAS[79.9663]DDDMEGDEAVVR	R	C	222	237	16	2	4S(79.9663)	sp|O75643|U520_HUMAN	O75643	U520_HUMAN	SNRNP200	U5 small nuclear ribonucleoprotein 200 kDa helicase			2	0	MS/MS	STY:79.9663@EEAS(1.0000)DDDMEGDEAVVR;
EEDEEPESPPEK	EEDEEPES[79.9663]PPEK	K	K	207	218	12	2	8S(79.9663)	sp|Q9H1E3|NUCKS_HUMAN	Q9H1E3	NUCKS_HUMAN	NUCKS1	Nuclear ubiquitous casein and cyclin-dependent kinase substrate 1			17	3.7600772E7	MS/MS	STY:79.9663@EEDEEPES(1.0000)PPEK;
EEDEEPESPPEKK	EEDEEPES[79.9663]PPEKK	K	T	207	219	13	2	8S(79.9663)	sp|Q9H1E3|NUCKS_HUMAN	Q9H1E3	NUCKS_HUMAN	NUCKS1	Nuclear ubiquitous casein and cyclin-dependent kinase substrate 1			2	1.33302e+06	MS/MS	STY:79.9663@EEDEEPES(1.0000)PPEKK;
EEDEPEERSGDETPGSEVPGDK	EEDEPEERSGDETPGS[79.9663]EVPGDK	R	A	153	174	22	3	16S(79.9663)	sp|Q1KMD3|HNRL2_HUMAN	Q1KMD3	HNRL2_HUMAN	HNRNPUL2	Heterogeneous nuclear ribonucleoprotein U-like protein 2			1	1.0523083E7	MS/MS	STY:79.9663@EEDEPEERS(0.0287)GDET(0.0302)PGS(0.9411)EVPGDK;
EEDEPEERSGDETPGSEVPGDK	EEDEPEERS[79.9663]GDETPGSEVPGDK	R	A	153	174	22	3	9S(79.9663)	sp|Q1KMD3|HNRL2_HUMAN	Q1KMD3	HNRL2_HUMAN	HNRNPUL2	Heterogeneous nuclear ribonucleoprotein U-like protein 2			2	1.0523083E7	MS/MS	STY:79.9663@EEDEPEERS(0.8920)GDET(0.0787)PGS(0.0293)EVPGDK;
EEEEGISQESSEEEQ	EEEEGISQES[79.9663]S[79.9663]EEEQ	K	-	93	107	15	2	10S(79.9663),11S(79.9663)	sp|P17096|HMGA1_HUMAN	P17096	HMGA1_HUMAN	HMGA1	High mobility group protein HMG-I/HMG-Y			1	4164452	MS/MS	STY:79.9663@EEEEGIS(0.1271)QES(0.9364)S(0.9364)EEEQ;
EEETSIDVAGKPNEVTK	EEET[79.9663]SIDVAGKPNEVTK	K	A	463	479	17	2,3	4T(79.9663)	sp|P53985|MOT1_HUMAN	P53985	MOT1_HUMAN	SLC16A1	Monocarboxylate transporter 1			2	3455777	MS/MS	STY:79.9663@EEET(0.4916)S(0.4916)IDVAGKPNEVT(0.0168)K;
EEGSLSDTEADAVSGQLPDPTTNPSAGK	EEGSLSDTEADAVS[79.9663]GQLPDPTTNPSAGK	K	D	515	542	28	3	14S(79.9663)	sp|Q8N1G4|LRC47_HUMAN	Q8N1G4	LRC47_HUMAN	LRRC47	Leucine-rich repeat-containing protein 47			1	1.9230814E7	MS/MS	STY:79.9663@EEGS(0.0441)LS(0.0094)DT(0.0094)EADAVS(0.9065)GQLPDPT(0.0097)T(0.0097)NPS(0.0112)AGK;
EEGSLSDTEADAVSGQLPDPTTNPSAGK	EEGSLS[79.9663]DTEADAVSGQLPDPTTNPSAGK	K	D	515	542	28	3	6S(79.9663)	sp|Q8N1G4|LRC47_HUMAN	Q8N1G4	LRC47_HUMAN	LRRC47	Leucine-rich repeat-containing protein 47			1	1.9230814E7	MS/MS	STY:79.9663@EEGS(0.0072)LS(0.4780)DT(0.4780)EADAVS(0.0109)GQLPDPT(0.0076)T(0.0091)NPS(0.0091)AGK;
EEGSLSDTEADAVSGQLPDPTTNPSAGK	EEGS[79.9663]LSDTEADAVSGQLPDPTTNPSAGK	K	D	515	542	28	3	4S(79.9663)	sp|Q8N1G4|LRC47_HUMAN	Q8N1G4	LRC47_HUMAN	LRRC47	Leucine-rich repeat-containing protein 47			1	1.9230814E7	MS/MS	STY:79.9663@EEGS(0.4541)LS(0.0110)DT(0.0053)EADAVS(0.0049)GQLPDPT(0.1749)T(0.1749)NPS(0.1749)AGK;
EELMSSDLEETAGSTSIPK	EELMSSDLEET[79.9663]AGSTSIPK	K	R	515	533	19	2	11T(79.9663)	sp|O00567|NOP56_HUMAN	O00567	NOP56_HUMAN	NOP56	Nucleolar protein 56			1	1.6525343E7	MS/MS	STY:79.9663@EELMS(0.0044)S(0.0044)DLEET(0.2478)AGS(0.2478)T(0.2478)S(0.2478)IPK;
EELMSSDLEETAGSTSIPK	EELMSS[79.9663]DLEETAGSTSIPK	K	R	515	533	19	2	6S(79.9663)	sp|O00567|NOP56_HUMAN	O00567	NOP56_HUMAN	NOP56	Nucleolar protein 56			1	2.1984528E7	MS/MS	STY:79.9663@EELMS(0.0696)S(0.8553)DLEET(0.0138)AGS(0.0211)T(0.0201)S(0.0201)IPK;
EELMSSDLEETAGSTSIPK	EELMS[79.9663]SDLEETAGSTSIPK	K	R	515	533	19	2,3	5S(79.9663)	sp|O00567|NOP56_HUMAN	O00567	NOP56_HUMAN	NOP56	Nucleolar protein 56			4	3.5088792E7	MS/MS	STY:79.9663@EELMS(0.9225)S(0.0121)DLEET(0.0163)AGS(0.0163)T(0.0163)S(0.0163)IPK;
EELTPGAPQHQLPPVPGSPEPYPGQQAPGPEPSQPLLELTPR	EELTPGAPQHQLPPVPGS[79.9663]PEPYPGQQAPGPEPSQPLLELTPR	K	A	143	184	42	4	18S(79.9663)	sp|Q9H6F5|CCD86_HUMAN	Q9H6F5	CCD86_HUMAN	CCDC86	Coiled-coil domain-containing protein 86			1	1.5281694E7	MS/MS	STY:79.9663@EELT(0.0151)PGAPQHQLPPVPGS(0.4717)PEPY(0.4717)PGQQAPGPEPS(0.0093)QPLLELT(0.0322)PR;
EELTPGAPQHQLPPVPGSPEPYPGQQAPGPEPSQPLLELTPR	EELT[79.9663]PGAPQHQLPPVPGSPEPYPGQQAPGPEPSQPLLELTPR	K	A	143	184	42	4	4T(79.9663)	sp|Q9H6F5|CCD86_HUMAN	Q9H6F5	CCD86_HUMAN	CCDC86	Coiled-coil domain-containing protein 86			1	1.5281694E7	MS/MS	STY:79.9663@EELT(0.3078)PGAPQHQLPPVPGS(0.2966)PEPY(0.2860)PGQQAPGPEPS(0.0536)QPLLELT(0.0561)PR;
EEPAAAGSGAASPSAAEK	EEPAAAGSGAAS[79.9663]PSAAEK	K	G	70	87	18	2	12S(79.9663)	sp|P29966|MARCS_HUMAN	P29966	MARCS_HUMAN	MARCKS	Myristoylated alanine-rich C-kinase substrate			1	2.53958e+06	MS/MS	STY:79.9663@EEPAAAGS(0.0202)GAAS(0.4899)PS(0.4899)AAEK;
EEPLSEEEPCTSTAIASPEK	EEPLS[79.9663]EEEPC[57.0215]TSTAIASPEK	K	K	498	517	20	3	10C(57.0215),5S(79.9663)	sp|Q9Y2X3|NOP58_HUMAN	Q9Y2X3	NOP58_HUMAN	NOP58	Nucleolar protein 58			1	5.0317e+06	MS/MS	STY:79.9663@EEPLS(0.9463)EEEPCT(0.0135)S(0.0134)T(0.0134)AIAS(0.0134)PEK;
EEPSQNDISPK	EEPSQNDIS[79.9663]PK	K	T	81	91	11	2	9S(79.9663)	sp|Q9NR30|DDX21_HUMAN	Q9NR30	DDX21_HUMAN	DDX21	Nucleolar RNA helicase 2			2	2.91605e+06	MS/MS	STY:79.9663@EEPS(0.0528)QNDIS(0.9472)PK;
EESEESDEDMGFGLFD	EESEES[79.9663]DEDMGFGLFD	K	-	302	317	16	2	6S(79.9663)	sp|P05388|RLA0_HUMAN	P05388	RLA0_HUMAN	RPLP0	Large ribosomal subunit protein uL10	RPLP0P6	sp|Q8NHW5|RLA0L_HUMAN	1	2.53757e+06	MS/MS	STY:79.9663@EES(0.0521)EES(0.9479)DEDMGFGLFD;
EESSELEQPFAQDTSSVGPDR	EESSELEQPFAQDT[79.9663]SSVGPDR	K	K	232	252	21	3	14T(79.9663)	sp|Q15424|SAFB1_HUMAN	Q15424	SAFB1_HUMAN	SAFB	Scaffold attachment factor B1	SAFB2	sp|Q14151|SAFB2_HUMAN	1	0	MS/MS	STY:79.9663@EES(0.0382)S(0.0237)ELEQPFAQDT(0.9073)S(0.0154)S(0.0154)VGPDR;
EESAEELQAAEHPDEVEDPK	EES[79.9663]AEELQAAEHPDEVEDPK	K	N	145	164	20	3	3S(79.9663)	sp|O00193|SMAP_HUMAN	O00193	SMAP_HUMAN	SMAP	Small acidic protein			2	3671319	MS/MS	STY:79.9663@EES(1.0000)AEELQAAEHPDEVEDPK;
EESEESDDDMGFGLFD	EES[79.9663]EESDDDMGFGLFD	K	-	100	115	16	2	3S(79.9663)	sp|P05387|RLA2_HUMAN	P05387	RLA2_HUMAN	RPLP2	Large ribosomal subunit protein P2	RPLP1	sp|P05386|RLA1_HUMAN	1	389139	MS/MS	STY:79.9663@EES(0.9407)EES(0.0593)DDDMGFGLFD;
EESEESDEDMGFGLFD	EES[79.9663]EESDEDMGFGLFD	K	-	302	317	16	2	3S(79.9663)	sp|P05388|RLA0_HUMAN	P05388	RLA0_HUMAN	RPLP0	Large ribosomal subunit protein uL10	RPLP0P6	sp|Q8NHW5|RLA0L_HUMAN	1	2.53757e+06	MS/MS	STY:79.9663@EES(0.9442)EES(0.0558)DEDMGFGLFD;
EFDELNPSAQR	EFDELNPS[79.9663]AQR	R	D	656	666	11	2	8S(79.9663)	sp|P16615|AT2A2_HUMAN	P16615	AT2A2_HUMAN	ATP2A2	Sarcoplasmic/endoplasmic reticulum calcium ATPase 2			1	2.38724e+06	MS/MS	STY:79.9663@EFDELNPS(1.0000)AQR;
EFITGDVEPTDAESEWHSENEEEEK	EFITGDVEPTDAESEWHS[79.9663]ENEEEEK	R	L	108	132	25	3	18S(79.9663)	sp|Q99733|NP1L4_HUMAN	Q99733	NP1L4_HUMAN	NAP1L4	Nucleosome assembly protein 1-like 4			5	8.239932E7	MS/MS	STY:79.9663@EFIT(0.0178)GDVEPT(0.0182)DAES(0.0182)EWHS(0.9459)ENEEEEK;
EFITGDVEPTDAESEWHSENEEEEK	EFITGDVEPTDAES[79.9663]EWHSENEEEEK	R	L	108	132	25	3	14S(79.9663)	sp|Q99733|NP1L4_HUMAN	Q99733	NP1L4_HUMAN	NAP1L4	Nucleosome assembly protein 1-like 4			2	6.0412608E7	MS/MS	STY:79.9663@EFIT(0.0296)GDVEPT(0.0328)DAES(0.9151)EWHS(0.0225)ENEEEEK;
EFITGDVEPTDAESEWHSENEEEEK	EFITGDVEPT[79.9663]DAESEWHSENEEEEK	R	L	108	132	25	3	10T(79.9663)	sp|Q99733|NP1L4_HUMAN	Q99733	NP1L4_HUMAN	NAP1L4	Nucleosome assembly protein 1-like 4			1	6.75126E7	MS/MS	STY:79.9663@EFIT(0.3496)GDVEPT(0.6039)DAES(0.0204)EWHS(0.0261)ENEEEEK;
EGEEPTVYSDEEEPK	EGEEPTVYS[79.9663]DEEEPK	K	D	173	187	15	2	9S(79.9663)	sp|O00264|PGRC1_HUMAN	O00264	PGRC1_HUMAN	PGRMC1	Membrane-associated progesterone receptor component 1			2	1.2497922E7	MS/MS	STY:79.9663@EGEEPT(0.0264)VY(0.0266)S(0.9471)DEEEPK;
EGEEPTVYSDEEEPKDESAR	EGEEPTVYS[79.9663]DEEEPKDESAR	K	K	173	192	20	3	9S(79.9663)	sp|O00264|PGRC1_HUMAN	O00264	PGRC1_HUMAN	PGRMC1	Membrane-associated progesterone receptor component 1			1	5.65694e+06	MS/MS	STY:79.9663@EGEEPT(0.0294)VY(0.0316)S(0.9035)DEEEPKDES(0.0355)AR;
EGEEPTVYSDEEEPK	EGEEPTVY[79.9663]SDEEEPK	K	D	173	187	15	2	8Y(79.9663)	sp|O00264|PGRC1_HUMAN	O00264	PGRC1_HUMAN	PGRMC1	Membrane-associated progesterone receptor component 1			1	1.2497922E7	MS/MS	STY:79.9663@EGEEPT(0.0164)VY(0.4918)S(0.4918)DEEEPK;
EGEEPTVYSDEEEPK	EGEEPT[79.9663]VYSDEEEPK	K	D	173	187	15	2	6T(79.9663)	sp|O00264|PGRC1_HUMAN	O00264	PGRC1_HUMAN	PGRMC1	Membrane-associated progesterone receptor component 1			2	1.2497922E7	MS/MS	STY:79.9663@EGEEPT(0.3333)VY(0.3333)S(0.3333)DEEEPK;
EGEEPTVYSDEEEPKDESAR	EGEEPT[79.9663]VYSDEEEPKDESAR	K	K	173	192	20	3	6T(79.9663)	sp|O00264|PGRC1_HUMAN	O00264	PGRC1_HUMAN	PGRMC1	Membrane-associated progesterone receptor component 1			2	5.65694e+06	MS/MS	STY:79.9663@EGEEPT(0.4708)VY(0.4708)S(0.0204)DEEEPKDES(0.0381)AR;
EGETQGVAFEHESPADFQNSQSPVQDQDK	EGETQGVAFEHESPADFQNS[79.9663]QSPVQDQDK	R	S	341	369	29	3	20S(79.9663)	sp|P78332|RBM6_HUMAN	P78332	RBM6_HUMAN	RBM6	RNA-binding protein 6			1	3.85256e+06	MS/MS	STY:79.9663@EGET(0.2510)QGVAFEHES(0.3205)PADFQNS(0.3593)QS(0.0693)PVQDQDK;
EGHSLEMENENLVENGADSDEDDNSFLK	EGHSLEMENENLVENGADS[79.9663]DEDDNSFLK	K	Q	668	695	28	3	19S(79.9663)	sp|Q9UHB6|LIMA1_HUMAN	Q9UHB6	LIMA1_HUMAN	LIMA1	LIM domain and actin-binding protein 1			2	1.3444596E7	MS/MS	STY:79.9663@EGHS(0.0264)LEMENENLVENGADS(0.8718)DEDDNS(0.1018)FLK;
EGITGPPADSSKPIGPDDAIDALSSDFTCGSPTAAGK	EGITGPPADSSKPIGPDDAIDALSSDFTC[57.0215]GS[79.9663]PTAAGK	K	K	213	249	37	3	29C(57.0215),31S(79.9663)	sp|P20810|ICAL_HUMAN	P20810	ICAL_HUMAN	CAST	Calpastatin			1	1.3435443E7	MS/MS	STY:79.9663@EGIT(0.0127)GPPADS(0.0151)S(0.0151)KPIGPDDAIDALS(0.0195)S(0.0162)DFT(0.0107)CGS(0.4553)PT(0.4553)AAGK;
EGITGPPADSSKPIGPDDAIDALSSDFTCGSPTAAGK	EGITGPPADSSKPIGPDDAIDALSSDFT[79.9663]C[57.0215]GSPTAAGK	K	K	213	249	37	3	28T(79.9663),29C(57.0215)	sp|P20810|ICAL_HUMAN	P20810	ICAL_HUMAN	CAST	Calpastatin			1	1.3435443E7	MS/MS	STY:79.9663@EGIT(0.0263)GPPADS(0.0596)S(0.0596)KPIGPDDAIDALS(0.0063)S(0.0063)DFT(0.4180)CGS(0.4180)PT(0.0057)AAGK;
EGLRPGDTTSTFCGTPNYIAPEILR	EGLRPGDTTSTFC[57.0215]GT[79.9663]PNYIAPEILR	K	G	402	426	25	3	13C(57.0215),15T(79.9663)	sp|P41743|KPCI_HUMAN	P41743	KPCI_HUMAN	PRKCI	Protein kinase C iota type			1	0	MS/MS	STY:79.9663@EGLRPGDT(0.1985)T(0.1985)S(0.1985)T(0.1985)FCGT(0.2025)PNY(0.0034)IAPEILR;
EGLRPGDTTSTFCGTPNYIAPEILR	EGLRPGDT[79.9663]TSTFC[57.0215]GTPNYIAPEILR	K	G	402	426	25	3	13C(57.0215),8T(79.9663)	sp|P41743|KPCI_HUMAN	P41743	KPCI_HUMAN	PRKCI	Protein kinase C iota type			1	0	MS/MS	STY:79.9663@EGLRPGDT(0.2251)T(0.2251)S(0.2251)T(0.2251)FCGT(0.0498)PNY(0.0498)IAPEILR;
EGMNPSYDEYADSDEDQHDAYLER	EGMNPSYDEYADS[79.9663]DEDQHDAYLER	K	M	432	455	24	3	13S(79.9663)	sp|Q08945|SSRP1_HUMAN	Q08945	SSRP1_HUMAN	SSRP1	FACT complex subunit SSRP1			1	3.63768e+06	MS/MS	STY:79.9663@EGMNPS(0.0138)Y(0.0147)DEY(0.0147)ADS(0.9413)DEDQHDAY(0.0156)LER;
EGMNPSYDEYADSDEDQHDAYLER	EGMNPS[79.9663]YDEYADSDEDQHDAYLER	K	M	432	455	24	3	6S(79.9663)	sp|Q08945|SSRP1_HUMAN	Q08945	SSRP1_HUMAN	SSRP1	FACT complex subunit SSRP1			1	3.63768e+06	MS/MS	STY:79.9663@EGMNPS(0.2455)Y(0.2455)DEY(0.2455)ADS(0.2455)DEDQHDAY(0.0179)LER;
EGNTTEDDFPSSPGNGNK	EGNTTEDDFPS[79.9663]SPGNGNK	R	S	295	312	18	2	11S(79.9663)	sp|Q15007|FL2D_HUMAN	Q15007	FL2D_HUMAN	WTAP	Pre-mRNA-splicing regulator WTAP			1	2.1854e+06	MS/MS	STY:79.9663@EGNT(0.0226)T(0.0226)EDDFPS(0.4774)S(0.4774)PGNGNK;
EGPTVETK	EGPT[79.9663]VETK	R	R	29	36	8	2	4T(79.9663)	sp|Q96AT1|K1143_HUMAN	Q96AT1	K1143_HUMAN	KIAA1143	Uncharacterized protein KIAA1143			1	606103	MS/MS	STY:79.9663@EGPT(0.5741)VET(0.4259)K;
EGSTQQLQTTSPK	EGSTQQLQT[79.9663]TSPK	R	V	606	618	13	2	9T(79.9663)	sp|Q5T8P6|RBM26_HUMAN	Q5T8P6	RBM26_HUMAN	RBM26	RNA-binding protein 26			1	0	MS/MS	STY:79.9663@EGS(0.0066)T(0.0066)QQLQT(0.3290)T(0.3290)S(0.3290)PK;
EGSPIPHDPEFGSK	EGS[79.9663]PIPHDPEFGSK	R	L	443	456	14	2	3S(79.9663)	sp|P85037|FOXK1_HUMAN	P85037	FOXK1_HUMAN	FOXK1	Forkhead box protein K1			2	4.63609e+06	MS/MS	STY:79.9663@EGS(0.9314)PIPHDPEFGS(0.0686)K;
EGTAPSENGETK	EGTAPS[79.9663]ENGETK	K	A	73	84	12	2	6S(79.9663)	sp|Q15651|HMGN3_HUMAN	Q15651	HMGN3_HUMAN	HMGN3	High mobility group nucleosome-binding domain-containing protein 3			1	3.1308e+06	MS/MS	STY:79.9663@EGT(0.0177)APS(0.4911)ENGET(0.4911)K;
EGTPGSPSETPGPSPAGPAGDEPAESPSETPGPR	EGT[79.9663]PGSPSETPGPSPAGPAGDEPAESPSETPGPR	K	P	512	545	34	3	3T(79.9663)	sp|Q9NZT2|OGFR_HUMAN	Q9NZT2	OGFR_HUMAN	OGFR	Opioid growth factor receptor			1	6795822	MS/MS	STY:79.9663@EGT(0.2423)PGS(0.2423)PS(0.2423)ET(0.2423)PGPS(0.0052)PAGPAGDEPAES(0.0155)PS(0.0049)ET(0.0049)PGPR;
EIAIVHSDAEK	EIAIVHS[79.9663]DAEK	K	E	341	351	11	2,3	7S(79.9663)	sp|Q9H307|PININ_HUMAN	Q9H307	PININ_HUMAN	PNN	Pinin			5	9347892	MS/MS	STY:79.9663@EIAIVHS(1.0000)DAEK;
EIQNGNLHESDSESVPR	EIQNGNLHESDSES[79.9663]VPR	K	D	66	82	17	2	14S(79.9663)	sp|Q86UP2|KTN1_HUMAN	Q86UP2	KTN1_HUMAN	KTN1	Kinectin			1	7.14424e+06	MS/MS	STY:79.9663@EIQNGNLHES(0.0409)DS(0.0409)ES(0.9183)VPR;
EIQNGNLHESDSESVPR	EIQNGNLHESDS[79.9663]ESVPR	K	D	66	82	17	2,3	12S(79.9663)	sp|Q86UP2|KTN1_HUMAN	Q86UP2	KTN1_HUMAN	KTN1	Kinectin			6	9401818	MS/MS	STY:79.9663@EIQNGNLHES(0.0263)DS(0.9057)ES(0.0680)VPR;
EIQNGNLHESDSESVPR	EIQNGNLHES[79.9663]DSESVPR	K	D	66	82	17	2,3	10S(79.9663)	sp|Q86UP2|KTN1_HUMAN	Q86UP2	KTN1_HUMAN	KTN1	Kinectin			7	7.14424e+06	MS/MS	STY:79.9663@EIQNGNLHES(0.9469)DS(0.0267)ES(0.0264)VPR;
EISDDEAEEEK	EIS[79.9663]DDEAEEEK	K	G	224	234	11	2	3S(79.9663)	sp|P08238|HS90B_HUMAN	P08238	HS90B_HUMAN	HSP90AB1	Heat shock protein HSP 90-beta	HSP90AB3P	sp|Q58FF7|H90B3_HUMAN	12	3.81760192E8	MS/MS	STY:79.9663@EIS(1.0000)DDEAEEEK;
EKEISDDEAEEEK	EKEIS[79.9663]DDEAEEEK	R	G	222	234	13	2	5S(79.9663)	sp|P08238|HS90B_HUMAN	P08238	HS90B_HUMAN	HSP90AB1	Heat shock protein HSP 90-beta			5	7157920	MS/MS	STY:79.9663@EKEIS(1.0000)DDEAEEEK;
EKPELSEPSHLNGPSSDPEAAFLSR	EKPELSEPSHLNGPS[79.9663]SDPEAAFLSR	K	D	1997	2021	25	3	15S(79.9663)	sp|Q9H4A3|WNK1_HUMAN	Q9H4A3	WNK1_HUMAN	WNK1	Serine/threonine-protein kinase WNK1			2	1.1311407E7	MS/MS	STY:79.9663@EKPELS(0.0281)EPS(0.0281)HLNGPS(0.8845)S(0.0466)DPEAAFLS(0.0128)R;
EKTPELPEPSVK	EKT[79.9663]PELPEPSVK	K	V	218	229	12	2,3	3T(79.9663)	sp|Q8IYB3|SRRM1_HUMAN	Q8IYB3	SRRM1_HUMAN	SRRM1	Serine/arginine repetitive matrix protein 1			6	1.6324012E7	MS/MS	STY:79.9663@EKT(0.9473)PELPEPS(0.0527)VK;
ELDEEGSDPPLPGR	ELDEEGS[79.9663]DPPLPGR	R	A	169	182	14	2	7S(79.9663)	sp|Q9BRJ6|CHOLN_HUMAN	Q9BRJ6	CHOLN_HUMAN	CHLSN	Protein cholesin			1	3.3715e+06	MS/MS	STY:79.9663@ELDEEGS(1.0000)DPPLPGR;
ELEHNAEETYGENDENTDDK	ELEHNAEETYGENDENT[79.9663]DDK	R	N	632	651	20	2	17T(79.9663)	sp|O00461|GOLI4_HUMAN	O00461	GOLI4_HUMAN	GOLIM4	Golgi integral membrane protein 4			1	2.01264e+06	MS/MS	STY:79.9663@ELEHNAEET(0.1563)Y(0.1563)GENDENT(0.6874)DDK;
ELQGDGPPSSPTNDPTVK	ELQGDGPPSSPT[79.9663]NDPTVK	K	Y	704	721	18	2	12T(79.9663)	sp|Q12873|CHD3_HUMAN	Q12873	CHD3_HUMAN	CHD3	Chromodomain-helicase-DNA-binding protein 3			1	4.05772e+06	MS/MS	STY:79.9663@ELQGDGPPS(0.0196)S(0.0336)PT(0.9292)NDPT(0.0176)VK;
ELSDQATASPIVAR	ELSDQAT[79.9663]ASPIVAR	K	T	88	101	14	2	7T(79.9663)	sp|Q5JSH3|WDR44_HUMAN	Q5JSH3	WDR44_HUMAN	WDR44	WD repeat-containing protein 44			1	2586052	MS/MS	STY:79.9663@ELS(0.0196)DQAT(0.4902)AS(0.4902)PIVAR;
ELSNSPLR	ELS[79.9663]NSPLR	K	E	1316	1323	8	2	3S(79.9663)	sp|Q9UQ35|SRRM2_HUMAN	Q9UQ35	SRRM2_HUMAN	SRRM2	Serine/arginine repetitive matrix protein 2			1	8.25972e+06	MS/MS	STY:79.9663@ELS(0.5000)NS(0.5000)PLR;
ELTPASPTCTNSVSK	ELTPASPTC[57.0215]T[79.9663]NSVSK	R	N	521	535	15	2	10T(79.9663),9C(57.0215)	sp|P28715|ERCC5_HUMAN	P28715	ERCC5_HUMAN	ERCC5	DNA excision repair protein ERCC-5			1	3.93756e+06	MS/MS	STY:79.9663@ELT(0.0225)PAS(0.2166)PT(0.0075)CT(0.3724)NS(0.3724)VS(0.0085)K;
EMEHNTVCAAGTSPVGEIGEEK	EMEHNTVC[57.0215]AAGT[79.9663]SPVGEIGEEK	K	I	1544	1565	22	3	12T(79.9663),8C(57.0215)	sp|P18583|SON_HUMAN	P18583	SON_HUMAN	SON	Protein SON			2	8994060	MS/MS	STY:79.9663@EMEHNT(0.0174)VCAAGT(0.4913)S(0.4913)PVGEIGEEK;
EMLASDDEEDVSSK	EMLASDDEEDVSS[79.9663]K	K	V	76	89	14	2	13S(79.9663)	sp|Q0ZGT2|NEXN_HUMAN	Q0ZGT2	NEXN_HUMAN	NEXN	Nexilin			1	8991096	MS/MS	STY:79.9663@EMLAS(0.3852)DDEEDVS(0.0281)S(0.5867)K;
EMLMEDVGSEEEQEEEDEAPFQEK	EMLMEDVGS[79.9663]EEEQEEEDEAPFQEK	R	D	105	128	24	3	9S(79.9663)	sp|Q9H1E3|NUCKS_HUMAN	Q9H1E3	NUCKS_HUMAN	NUCKS1	Nuclear ubiquitous casein and cyclin-dependent kinase substrate 1			2	0	MS/MS	STY:79.9663@EMLMEDVGS(1.0000)EEEQEEEDEAPFQEK;
ENQRSPVR	ENQRS[79.9663]PVR	K	V	393	400	8	2	5S(79.9663)	sp|Q13427|PPIG_HUMAN	Q13427	PPIG_HUMAN	PPIG	Peptidyl-prolyl cis-trans isomerase G			1	1.3573e+06	MS/MS	STY:79.9663@ENQRS(1.0000)PVR;
ENSGPVENGVSDQEGEEQAR	ENSGPVENGVS[79.9663]DQEGEEQAR	K	E	768	787	20	2	11S(79.9663)	sp|Q8TEQ6|GEMI5_HUMAN	Q8TEQ6	GEMI5_HUMAN	GEMIN5	Gem-associated protein 5			1	1.20027e+06	MS/MS	STY:79.9663@ENS(0.0679)GPVENGVS(0.9321)DQEGEEQAR;
ENVEYIEREESDGEYDEFGR	ENVEYIEREESDGEY[79.9663]DEFGR	R	K	110	129	20	3	15Y(79.9663)	sp|O95218|ZRAB2_HUMAN	O95218	ZRAB2_HUMAN	ZRANB2	Zinc finger Ran-binding domain-containing protein 2			1	2.68579e+06	MS/MS	STY:79.9663@ENVEY(0.2121)IEREES(0.2169)DGEY(0.5710)DEFGR;
ENVEYIEREESDGEYDEFGR	ENVEY[79.9663]IEREESDGEYDEFGR	R	K	110	129	20	3	5Y(79.9663)	sp|O95218|ZRAB2_HUMAN	O95218	ZRAB2_HUMAN	ZRANB2	Zinc finger Ran-binding domain-containing protein 2			1	2.68579e+06	MS/MS	STY:79.9663@ENVEY(0.4282)IEREES(0.2638)DGEY(0.3079)DEFGR;
EPAITSQNSPEAR	EPAITSQNS[79.9663]PEAR	K	E	92	104	13	2	9S(79.9663)	sp|P23193|TCEA1_HUMAN	P23193	TCEA1_HUMAN	TCEA1	Transcription elongation factor A protein 1			1	1.7908116E7	MS/MS	STY:79.9663@EPAIT(0.0373)S(0.0350)QNS(0.9277)PEAR;
EPAITSQNSPEAR	EPAIT[79.9663]SQNSPEAR	K	E	92	104	13	2	5T(79.9663)	sp|P23193|TCEA1_HUMAN	P23193	TCEA1_HUMAN	TCEA1	Transcription elongation factor A protein 1			4	1.7908116E7	MS/MS	STY:79.9663@EPAIT(0.9463)S(0.0269)QNS(0.0268)PEAR;
EPALPLEPDSGGNTSPGVTANGEAR	EPALPLEPDSGGNTS[79.9663]PGVTANGEAR	R	T	682	706	25	3	15S(79.9663)	sp|Q92974|ARHG2_HUMAN	Q92974	ARHG2_HUMAN	ARHGEF2	Rho guanine nucleotide exchange factor 2			1	7.67141e+06	MS/MS	STY:79.9663@EPALPLEPDS(0.0921)GGNT(0.0128)S(0.4475)PGVT(0.4475)ANGEAR;
EPALPLEPDSGGNTSPGVTANGEAR	EPALPLEPDS[79.9663]GGNTSPGVTANGEAR	R	T	682	706	25	3	10S(79.9663)	sp|Q92974|ARHG2_HUMAN	Q92974	ARHG2_HUMAN	ARHGEF2	Rho guanine nucleotide exchange factor 2			3	7.67141e+06	MS/MS	STY:79.9663@EPALPLEPDS(0.9440)GGNT(0.0188)S(0.0188)PGVT(0.0183)ANGEAR;
EPPRASPPGGLAEPPGSAGPQAGPTVVPGSATPMETGIAETPEGR	EPPRASPPGGLAEPPGSAGPQAGPT[79.9663]VVPGSATPMETGIAETPEGR	K	R	64	108	45	4	25T(79.9663)	sp|O60341|KDM1A_HUMAN	O60341	KDM1A_HUMAN	KDM1A	Lysine-specific histone demethylase 1A			1	1.4706326E7	MS/MS	STY:79.9663@EPPRAS(0.0980)PPGGLAEPPGS(0.0100)AGPQAGPT(0.8568)VVPGS(0.0093)AT(0.0090)PMET(0.0085)GIAET(0.0085)PEGR;
EPPRASPPGGLAEPPGSAGPQAGPTVVPGSATPMETGIAETPEGR	EPPRASPPGGLAEPPGS[79.9663]AGPQAGPTVVPGSATPMETGIAETPEGR	K	R	64	108	45	4	17S(79.9663)	sp|O60341|KDM1A_HUMAN	O60341	KDM1A_HUMAN	KDM1A	Lysine-specific histone demethylase 1A			1	1.4706326E7	MS/MS	STY:79.9663@EPPRAS(0.0383)PPGGLAEPPGS(0.8989)AGPQAGPT(0.0100)VVPGS(0.0121)AT(0.0128)PMET(0.0144)GIAET(0.0135)PEGR;
EPPRASPPGGLAEPPGSAGPQAGPTVVPGSATPMETGIAETPEGR	EPPRAS[79.9663]PPGGLAEPPGSAGPQAGPTVVPGSATPMETGIAETPEGR	K	R	64	108	45	4	6S(79.9663)	sp|O60341|KDM1A_HUMAN	O60341	KDM1A_HUMAN	KDM1A	Lysine-specific histone demethylase 1A			1	1.4706326E7	MS/MS	STY:79.9663@EPPRAS(0.6368)PPGGLAEPPGS(0.0461)AGPQAGPT(0.1323)VVPGS(0.0487)AT(0.0487)PMET(0.0681)GIAET(0.0194)PEGR;
EPVADEEEEDSDDDVEPITEFR	EPVADEEEEDS[79.9663]DDDVEPITEFR	K	F	92	113	22	3	11S(79.9663)	sp|P54105|ICLN_HUMAN	P54105	ICLN_HUMAN	CLNS1A	Methylosome subunit pICln			1	6.31016e+06	MS/MS	STY:79.9663@EPVADEEEEDS(0.9485)DDDVEPIT(0.0515)EFR;
EPVVAVAAPASSESSSTNHSIGSTQSTPCSTSSMA	EPVVAVAAPAS[79.9663]SES[79.9663]S[79.9663]STNHSIGSTQSTPC[57.0215]STSSMA	R	-	624	658	35	3	11S(79.9663),14S(79.9663),15S(79.9663),29C(57.0215)	sp|P17813|EGLN_HUMAN	P17813	EGLN_HUMAN	ENG	Endoglin			1	9393415	MS/MS	STY:79.9663@EPVVAVAAPAS(0.6945)S(0.0305)ES(0.5090)S(0.5090)S(0.0239)T(0.0239)NHS(0.0158)IGS(0.0292)T(0.0292)QS(0.0292)T(0.0292)PCS(0.0292)T(0.0292)S(0.5090)S(0.5090)MA;
EQPEMEDANSEK	EQPEMEDANS[79.9663]EK	R	S	11	22	12	2	10S(79.9663)	sp|Q13523|PRP4K_HUMAN	Q13523	PRP4K_HUMAN	PRP4K	Serine/threonine-protein kinase PRP4 homolog			1	4.98164e+06	MS/MS	STY:79.9663@EQPEMEDANS(1.0000)EK;
ERDAEQSGSPR	ERDAEQS[79.9663]GSPR	R	T	186	196	11	2	7S(79.9663)	sp|P08651|NFIC_HUMAN	P08651	NFIC_HUMAN	NFIC	Nuclear factor 1 C-type			1	0	MS/MS	STY:79.9663@ERDAEQS(0.5000)GS(0.5000)PR;
ERDHSPTPSVFNSDEER	ERDHSPTPS[79.9663]VFNSDEER	R	Y	488	504	17	3	9S(79.9663)	sp|Q6UN15|FIP1_HUMAN	Q6UN15	FIP1_HUMAN	FIP1L1	Pre-mRNA 3'-end-processing factor FIP1			1	1.72127e+06	MS/MS	STY:79.9663@ERDHS(0.1771)PT(0.0146)PS(0.4042)VFNS(0.4042)DEER;
ERDHSPTPSVFNSDEER	ERDHS[79.9663]PTPSVFNSDEER	R	Y	488	504	17	3	5S(79.9663)	sp|Q6UN15|FIP1_HUMAN	Q6UN15	FIP1_HUMAN	FIP1L1	Pre-mRNA 3'-end-processing factor FIP1			1	1.72127e+06	MS/MS	STY:79.9663@ERDHS(0.9108)PT(0.0297)PS(0.0297)VFNS(0.0297)DEER;
ERSMSENAVR	ERS[79.9663]MSENAVR	R	Q	153	162	10	2	3S(79.9663)	sp|Q9GZY8|MFF_HUMAN	Q9GZY8	MFF_HUMAN	MFF	Mitochondrial fission factor			1	973855	MS/MS	STY:79.9663@ERS(0.9438)MS(0.0562)ENAVR;
ESDQTLAALLSPK	ESDQTLAALLS[79.9663]PK	K	E	1687	1699	13	2	11S(79.9663)	sp|P18583|SON_HUMAN	P18583	SON_HUMAN	SON	Protein SON			1	5119089	MS/MS	STY:79.9663@ES(0.0687)DQT(0.1702)LAALLS(0.7611)PK;
ESEDKPEIEDVGSDEEEEK	ESEDKPEIEDVGS[79.9663]DEEEEK	K	K	251	269	19	2,3	13S(79.9663)	sp|P07900|HS90A_HUMAN	P07900	HS90A_HUMAN	HSP90AA1	Heat shock protein HSP 90-alpha			7	5.214466E7	MS/MS	STY:79.9663@ES(0.0525)EDKPEIEDVGS(0.9475)DEEEEK;
ESEDKPEIEDVGSDEEEEKK	ESEDKPEIEDVGS[79.9663]DEEEEKK	K	D	251	270	20	3	13S(79.9663)	sp|P07900|HS90A_HUMAN	P07900	HS90A_HUMAN	HSP90AA1	Heat shock protein HSP 90-alpha			4	3.2460556E7	MS/MS	STY:79.9663@ES(0.0677)EDKPEIEDVGS(0.9323)DEEEEKK;
ESLKEEDESDDDNM	ESLKEEDES[79.9663]DDDNM	K	-	242	255	14	2	9S(79.9663)	sp|P25788|PSA3_HUMAN	P25788	PSA3_HUMAN	PSMA3	Proteasome subunit alpha type-3			4	3.1422736E7	MS/MS	STY:79.9663@ES(0.0518)LKEEDES(0.9482)DDDNM;
ESPRPLQLPGAEGPAISDGEEGGGEPGAGGGAAGAAGAGR	ESPRPLQLPGAEGPAIS[79.9663]DGEEGGGEPGAGGGAAGAAGAGR	R	R	74	113	40	4	17S(79.9663)	sp|Q6PKG0|LARP1_HUMAN	Q6PKG0	LARP1_HUMAN	LARP1	La-related protein 1			1	3519673	MS/MS	STY:79.9663@ES(0.0837)PRPLQLPGAEGPAIS(0.9163)DGEEGGGEPGAGGGAAGAAGAGR;
ESSANNSVSPSESLR	ESSANNSVS[79.9663]PSESLR	R	A	195	209	15	2	9S(79.9663)	sp|Q04726|TLE3_HUMAN	Q04726	TLE3_HUMAN	TLE3	Transducin-like enhancer protein 3			1	3.00252e+06	MS/MS	STY:79.9663@ES(0.0055)S(0.0055)ANNS(0.0056)VS(0.3278)PS(0.3278)ES(0.3278)LR;
ESTQLSPADLTEGKPTDPSK	ESTQLS[79.9663]PADLTEGKPTDPSK	R	L	451	470	20	3	6S(79.9663)	sp|Q08J23|NSUN2_HUMAN	Q08J23	NSUN2_HUMAN	NSUN2	RNA cytosine C(5)-methyltransferase NSUN2			1	1.402888E7	MS/MS	STY:79.9663@ES(0.0078)T(0.0078)QLS(0.6340)PADLT(0.1270)EGKPT(0.1139)DPS(0.1095)K;
ESVPEFPLSPPK	ESVPEFPLS[79.9663]PPK	K	K	30	41	12	2	9S(79.9663)	sp|P16949|STMN1_HUMAN	P16949	STMN1_HUMAN	STMN1	Stathmin			2	4.2462476E7	MS/MS	STY:79.9663@ES(0.0521)VPEFPLS(0.9479)PPK;
ESEDKPEIEDVGSDEEEEK	ES[79.9663]EDKPEIEDVGSDEEEEK	K	K	251	269	19	3	2S(79.9663)	sp|P07900|HS90A_HUMAN	P07900	HS90A_HUMAN	HSP90AA1	Heat shock protein HSP 90-alpha			1	0	MS/MS	STY:79.9663@ES(0.9366)EDKPEIEDVGS(0.0634)DEEEEK;
ESEDKPEIEDVGSDEEEEKK	ES[79.9663]EDKPEIEDVGSDEEEEKK	K	D	251	270	20	3	2S(79.9663)	sp|P07900|HS90A_HUMAN	P07900	HS90A_HUMAN	HSP90AA1	Heat shock protein HSP 90-alpha			4	2.1634052E7	MS/MS	STY:79.9663@ES(0.9464)EDKPEIEDVGS(0.0536)DEEEEKK;
ESLKEEDESDDDNM	ES[79.9663]LKEEDESDDDNM	K	-	242	255	14	2	2S(79.9663)	sp|P25788|PSA3_HUMAN	P25788	PSA3_HUMAN	PSMA3	Proteasome subunit alpha type-3			1	7.71979e+06	MS/MS	STY:79.9663@ES(0.5000)LKEEDES(0.5000)DDDNM;
ESPRPLQLPGAEGPAISDGEEGGGEPGAGGGAAGAAGAGR	ES[79.9663]PRPLQLPGAEGPAISDGEEGGGEPGAGGGAAGAAGAGR	R	R	74	113	40	3,4	2S(79.9663)	sp|Q6PKG0|LARP1_HUMAN	Q6PKG0	LARP1_HUMAN	LARP1	La-related protein 1			3	1.534863E7	MS/MS	STY:79.9663@ES(0.9206)PRPLQLPGAEGPAIS(0.0794)DGEEGGGEPGAGGGAAGAAGAGR;
ESTQLSPADLTEGKPTDPSK	ES[79.9663]TQLSPADLTEGKPTDPSK	R	L	451	470	20	3	2S(79.9663)	sp|Q08J23|NSUN2_HUMAN	Q08J23	NSUN2_HUMAN	NSUN2	RNA cytosine C(5)-methyltransferase NSUN2			1	1.402888E7	MS/MS	STY:79.9663@ES(0.2707)T(0.2707)QLS(0.2707)PADLT(0.0360)EGKPT(0.0425)DPS(0.1095)K;
ESVPEFPLSPPK	ES[79.9663]VPEFPLSPPK	K	K	30	41	12	2	2S(79.9663)	sp|P16949|STMN1_HUMAN	P16949	STMN1_HUMAN	STMN1	Stathmin			2	4.2462476E7	MS/MS	STY:79.9663@ES(0.9435)VPEFPLS(0.0565)PPK;
ETEEQDSDSAEQGDPAGEGK	ETEEQDS[79.9663]DSAEQGDPAGEGK	R	E	54	73	20	2	7S(79.9663)	sp|O95361|TRI16_HUMAN	O95361	TRI16_HUMAN	TRIM16	Tripartite motif-containing protein 16			1	1.10738e+06	MS/MS	STY:79.9663@ET(0.2797)EEQDS(0.3602)DS(0.3602)AEQGDPAGEGK;
ETERASPIK	ETERAS[79.9663]PIK	K	M	353	361	9	2	6S(79.9663)	sp|P27816|MAP4_HUMAN	P27816	MAP4_HUMAN	MAP4	Microtubule-associated protein 4			1	1.2699257E7	MS/MS	STY:79.9663@ET(0.0557)ERAS(0.9443)PIK;
ETESAPGSPR	ETES[79.9663]APGSPR	K	A	514	523	10	2	4S(79.9663)	sp|Q6PKG0|LARP1_HUMAN	Q6PKG0	LARP1_HUMAN	LARP1	La-related protein 1			2	0	MS/MS	STY:79.9663@ET(0.0167)ES(0.4916)APGS(0.4916)PR;
ETPAATEAPSSTPK	ETPAATEAPSST[79.9663]PK	K	A	185	198	14	2	12T(79.9663)	sp|P80723|BASP1_HUMAN	P80723	BASP1_HUMAN	BASP1	Brain acid soluble protein 1			1	2.2819556E7	MS/MS	STY:79.9663@ET(0.0142)PAAT(0.0136)EAPS(0.0137)S(0.0137)T(0.9449)PK;
ETPAATEAPSSTPK	ETPAATEAPS[79.9663]STPK	K	A	185	198	14	2	10S(79.9663)	sp|P80723|BASP1_HUMAN	P80723	BASP1_HUMAN	BASP1	Brain acid soluble protein 1			3	2.2819556E7	MS/MS	STY:79.9663@ET(0.0064)PAAT(0.0064)EAPS(0.3291)S(0.3291)T(0.3291)PK;
ETPAATEAPSSTPK	ETPAAT[79.9663]EAPSSTPK	K	A	185	198	14	2	6T(79.9663)	sp|P80723|BASP1_HUMAN	P80723	BASP1_HUMAN	BASP1	Brain acid soluble protein 1			2	2.2819556E7	MS/MS	STY:79.9663@ET(0.0268)PAAT(0.9192)EAPS(0.0180)S(0.0180)T(0.0180)PK;
ETPHSPGVEDAPIAK	ETPHS[79.9663]PGVEDAPIAK	R	V	486	500	15	2	5S(79.9663)	sp|Q9UHB6|LIMA1_HUMAN	Q9UHB6	LIMA1_HUMAN	LIMA1	LIM domain and actin-binding protein 1			1	1.3844583E7	MS/MS	STY:79.9663@ET(0.0596)PHS(0.9404)PGVEDAPIAK;
ETVEKYK	ETVEKY[79.9663]K	K	R	73	79	7	2	6Y(79.9663)	sp|Q9HAV7|GRPE1_HUMAN	Q9HAV7	GRPE1_HUMAN	GRPEL1	GrpE protein homolog 1, mitochondrial			1	0	MS/MS	STY:79.9663@ET(0.0581)VEKY(0.9419)K;
ETVQTTQSPTPVEK	ETVQTTQSPT[79.9663]PVEK	K	E	610	623	14	2	10T(79.9663)	sp|Q9UPN6|SCAF8_HUMAN	Q9UPN6	SCAF8_HUMAN	SCAF8	SR-related and CTD-associated factor 8			1	0	MS/MS	STY:79.9663@ET(0.2440)VQT(0.1745)T(0.1745)QS(0.0074)PT(0.3997)PVEK;
ETEEQDSDSAEQGDPAGEGK	ET[79.9663]EEQDSDSAEQGDPAGEGK	R	E	54	73	20	2	2T(79.9663)	sp|O95361|TRI16_HUMAN	O95361	TRI16_HUMAN	TRIM16	Tripartite motif-containing protein 16			2	1.10738e+06	MS/MS	STY:79.9663@ET(0.8612)EEQDS(0.1047)DS(0.0341)AEQGDPAGEGK;
ETPHSPGVEDAPIAK	ET[79.9663]PHSPGVEDAPIAK	R	V	486	500	15	2,3	2T(79.9663)	sp|Q9UHB6|LIMA1_HUMAN	Q9UHB6	LIMA1_HUMAN	LIMA1	LIM domain and actin-binding protein 1			3	2.6652056E7	MS/MS	STY:79.9663@ET(0.9377)PHS(0.0623)PGVEDAPIAK;
ETVQTTQSPTPVEK	ET[79.9663]VQTTQSPTPVEK	K	E	610	623	14	2	2T(79.9663)	sp|Q9UPN6|SCAF8_HUMAN	Q9UPN6	SCAF8_HUMAN	SCAF8	SR-related and CTD-associated factor 8			1	0	MS/MS	STY:79.9663@ET(0.5000)VQT(0.1435)T(0.1435)QS(0.1435)PT(0.0695)PVEK;
EVAENQQNQSSDPEEEK	EVAENQQNQSS[79.9663]DPEEEK	K	G	29	45	17	2	11S(79.9663)	sp|O43491|E41L2_HUMAN	O43491	E41L2_HUMAN	EPB41L2	Band 4.1-like protein 2			1	0	MS/MS	STY:79.9663@EVAENQQNQS(0.0578)S(0.9422)DPEEEK;
EVDPSTGELQSLQMPESEGPSSLDPSQEGPTGLK	EVDPSTGELQSLQMPESEGPSSLDPSQEGPT[79.9663]GLK	K	E	345	378	34	3	31T(79.9663)	sp|Q13501|SQSTM_HUMAN	Q13501	SQSTM_HUMAN	SQSTM1	Sequestosome-1			1	1.102146E7	MS/MS	STY:79.9663@EVDPS(0.0149)T(0.0149)GELQS(0.0067)LQMPES(0.0884)EGPS(0.0884)S(0.0884)LDPS(0.0884)QEGPT(0.6096)GLK;
EVDPSTGELQSLQMPESEGPSSLDPSQEGPTGLK	EVDPSTGELQSLQMPESEGPSS[79.9663]LDPSQEGPTGLK	K	E	345	378	34	3	22S(79.9663)	sp|Q13501|SQSTM_HUMAN	Q13501	SQSTM_HUMAN	SQSTM1	Sequestosome-1			1	1.102146E7	MS/MS	STY:79.9663@EVDPS(0.0180)T(0.0180)GELQS(0.0228)LQMPES(0.0216)EGPS(0.0324)S(0.8644)LDPS(0.0111)QEGPT(0.0118)GLK;
EVDPSTGELQSLQMPESEGPSSLDPSQEGPTGLK	EVDPSTGELQSLQMPES[79.9663]EGPSSLDPSQEGPTGLK	K	E	345	378	34	3	17S(79.9663)	sp|Q13501|SQSTM_HUMAN	Q13501	SQSTM_HUMAN	SQSTM1	Sequestosome-1			2	6.7611696E7	MS/MS	STY:79.9663@EVDPS(0.0151)T(0.0066)GELQS(0.0066)LQMPES(0.7118)EGPS(0.1150)S(0.1150)LDPS(0.0089)QEGPT(0.0212)GLK;
EVEDKESEGEEEDEDEDLSK	EVEDKES[79.9663]EGEEEDEDEDLSK	K	Y	147	166	20	3	7S(79.9663)	sp|O95218|ZRAB2_HUMAN	O95218	ZRAB2_HUMAN	ZRANB2	Zinc finger Ran-binding domain-containing protein 2			2	3.20881e+06	MS/MS	STY:79.9663@EVEDKES(0.9478)EGEEEDEDEDLS(0.0522)K;
EVEELILTESK	EVEELILT[79.9663]ESK	K	K	170	180	11	2	8T(79.9663)	sp|Q9BZZ5|API5_HUMAN	Q9BZZ5	API5_HUMAN	API5	Apoptosis inhibitor 5			1	3.51437e+06	MS/MS	STY:79.9663@EVEELILT(0.5735)ES(0.4265)K;
EVQAEQPSSSSPR	EVQAEQPS[79.9663]SSSPR	R	R	178	190	13	2	8S(79.9663)	sp|Q9Y388|RBMX2_HUMAN	Q9Y388	RBMX2_HUMAN	RBMX2	RNA-binding motif protein, X-linked 2			2	1.31836e+06	MS/MS	STY:79.9663@EVQAEQPS(0.2500)S(0.2500)S(0.2500)S(0.2500)PR;
EVSSLEGSPPPCLGQEEAVCTK	EVSSLEGS[79.9663]PPPC[57.0215]LGQEEAVC[57.0215]TK	K	I	1388	1409	22	3	12C(57.0215),20C(57.0215),8S(79.9663)	sp|Q02952|AKA12_HUMAN	Q02952	AKA12_HUMAN	AKAP12	A-kinase anchor protein 12			1	0	MS/MS	STY:79.9663@EVS(0.0415)S(0.0415)LEGS(0.6599)PPPCLGQEEAVCT(0.2571)K;
EVSDDEAEEK	EVS[79.9663]DDEAEEK	K	E	229	238	10	2	3S(79.9663)	sp|P07900|HS90A_HUMAN	P07900	HS90A_HUMAN	HSP90AA1	Heat shock protein HSP 90-alpha			8	1.02368704E8	MS/MS	STY:79.9663@EVS(1.0000)DDEAEEK;
EVSDSEAGGGPQGER	EVS[79.9663]DSEAGGGPQGER	R	K	368	382	15	2	3S(79.9663)	sp|Q9BW71|HIRP3_HUMAN	Q9BW71	HIRP3_HUMAN	HIRIP3	HIRA-interacting protein 3			1	0	MS/MS	STY:79.9663@EVS(0.9448)DS(0.0552)EAGGGPQGER;
EVSPSDVR	EVS[79.9663]PSDVR	R	E	1942	1949	8	2	3S(79.9663)	sp|Q8WYP5|ELYS_HUMAN	Q8WYP5	ELYS_HUMAN	AHCTF1	Protein ELYS			2	3.61545e+06	MS/MS	STY:79.9663@EVS(0.9484)PS(0.0516)DVR;
EVTPESGPPK	EVT[79.9663]PESGPPK	K	V	193	202	10	2	3T(79.9663)	sp|P46087|NOP2_HUMAN	P46087	NOP2_HUMAN	NOP2	28S rRNA (cytosine(4447)-C(5))-methyltransferase			1	0	MS/MS	STY:79.9663@EVT(0.9448)PES(0.0552)GPPK;
EVVKPVPITSPAVSK	EVVKPVPIT[79.9663]SPAVSK	K	V	102	116	15	2	9T(79.9663)	sp|Q96HC4|PDLI5_HUMAN	Q96HC4	PDLI5_HUMAN	PDLIM5	PDZ and LIM domain protein 5			1	0	MS/MS	STY:79.9663@EVVKPVPIT(0.4918)S(0.4918)PAVS(0.0164)K;
EWYQSTIPQSPSPAPDDPEEGR	EWYQSTIPQSPS[79.9663]PAPDDPEEGR	R	Q	706	727	22	3	12S(79.9663)	sp|Q08499|PDE4D_HUMAN	Q08499	PDE4D_HUMAN	PDE4D	3',5'-cyclic-AMP phosphodiesterase 4D			1	2.80259e+06	MS/MS	STY:79.9663@EWY(0.0439)QS(0.0161)T(0.0161)IPQS(0.0132)PS(0.9107)PAPDDPEEGR;
EYIPGQPPLSQSSDSSPTR	EYIPGQPPLSQSSDS[79.9663]SPTR	K	N	871	889	19	2	15S(79.9663)	sp|P07814|SYEP_HUMAN	P07814	SYEP_HUMAN	EPRS1	Bifunctional glutamate/proline--tRNA ligase			2	1.26235E7	MS/MS	STY:79.9663@EY(0.0119)IPGQPPLS(0.0057)QS(0.0057)S(0.0057)DS(0.3490)S(0.3110)PT(0.3110)R;
EYIPGQPPLSQSSDSSPTR	EYIPGQPPLSQSS[79.9663]DSSPTR	K	N	871	889	19	2	13S(79.9663)	sp|P07814|SYEP_HUMAN	P07814	SYEP_HUMAN	EPRS1	Bifunctional glutamate/proline--tRNA ligase			1	1.26235E7	MS/MS	STY:79.9663@EY(0.0048)IPGQPPLS(0.0058)QS(0.0058)S(0.3248)DS(0.3248)S(0.3248)PT(0.0090)R;
EYIPGQPPLSQSSDSSPTR	EYIPGQPPLS[79.9663]QSSDSSPTR	K	N	871	889	19	2	10S(79.9663)	sp|P07814|SYEP_HUMAN	P07814	SYEP_HUMAN	EPRS1	Bifunctional glutamate/proline--tRNA ligase			1	1.26235E7	MS/MS	STY:79.9663@EY(0.0049)IPGQPPLS(0.3266)QS(0.3266)S(0.3266)DS(0.0050)S(0.0050)PT(0.0050)R;
EYVSNDAAQSDDEEK	EYVSNDAAQS[79.9663]DDEEK	K	L	394	408	15	2	10S(79.9663)	sp|Q5JSH3|WDR44_HUMAN	Q5JSH3	WDR44_HUMAN	WDR44	WD repeat-containing protein 44			1	0	MS/MS	STY:79.9663@EY(0.0282)VS(0.0299)NDAAQS(0.9420)DDEEK;
EYIPGQPPLSQSSDSSPTR	EY[79.9663]IPGQPPLSQSSDSSPTR	K	N	871	889	19	2	2Y(79.9663)	sp|P07814|SYEP_HUMAN	P07814	SYEP_HUMAN	EPRS1	Bifunctional glutamate/proline--tRNA ligase			1	1.26235E7	MS/MS	STY:79.9663@EY(0.9370)IPGQPPLS(0.0111)QS(0.0111)S(0.0111)DS(0.0103)S(0.0103)PT(0.0090)R;
FASDDEHDEHDENGATGPVK	FASDDEHDEHDENGAT[79.9663]GPVK	K	R	364	383	20	4	16T(79.9663)	sp|P05455|LA_HUMAN	P05455	LA_HUMAN	SSB	Lupus La protein			1	2.25831e+06	MS/MS	STY:79.9663@FAS(0.4072)DDEHDEHDENGAT(0.5928)GPVK;
FASDDEHDEHDENGATGPVK	FAS[79.9663]DDEHDEHDENGATGPVK	K	R	364	383	20	2,3	3S(79.9663)	sp|P05455|LA_HUMAN	P05455	LA_HUMAN	SSB	Lupus La protein			12	4.2146188E7	MS/MS	STY:79.9663@FAS(0.9478)DDEHDEHDENGAT(0.0522)GPVK;
FDSNEEDSASVFSPSFGLK	FDS[79.9663]NEEDSASVFSPSFGLK	K	Q	1464	1482	19	2	3S(79.9663)	sp|Q02880|TOP2B_HUMAN	Q02880	TOP2B_HUMAN	TOP2B	DNA topoisomerase 2-beta			1	0	MS/MS	STY:79.9663@FDS(0.6527)NEEDS(0.0365)AS(0.1536)VFS(0.0782)PS(0.0790)FGLK;
FEEAVTSYQK	FEEAVT[79.9663]SYQK	K	A	169	178	10	2	6T(79.9663)	sp|Q96EQ0|SGTB_HUMAN	Q96EQ0	SGTB_HUMAN	SGTB	Small glutamine-rich tetratricopeptide repeat-containing protein beta			1	3.51871e+06	MS/MS	STY:79.9663@FEEAVT(0.3333)S(0.3333)Y(0.3333)QK;
FEEESKEPVADEEEEDSDDDVEPITEFR	FEEESKEPVADEEEEDSDDDVEPIT[79.9663]EFR	K	F	86	113	28	3	25T(79.9663)	sp|P54105|ICLN_HUMAN	P54105	ICLN_HUMAN	CLNS1A	Methylosome subunit pICln			1	6217904	MS/MS	STY:79.9663@FEEES(0.0358)KEPVADEEEEDS(0.1065)DDDVEPIT(0.8576)EFR;
FEEESKEPVADEEEEDSDDDVEPITEFR	FEEESKEPVADEEEEDS[79.9663]DDDVEPITEFR	K	F	86	113	28	3	17S(79.9663)	sp|P54105|ICLN_HUMAN	P54105	ICLN_HUMAN	CLNS1A	Methylosome subunit pICln			1	6217904	MS/MS	STY:79.9663@FEEES(0.1624)KEPVADEEEEDS(0.8147)DDDVEPIT(0.0230)EFR;
FIQELSGSSPK	FIQELS[79.9663]GSSPK	R	R	116	126	11	2	6S(79.9663)	sp|Q01664|TFAP4_HUMAN	Q01664	TFAP4_HUMAN	TFAP4	Transcription factor AP-4			1	0	MS/MS	STY:79.9663@FIQELS(0.3333)GS(0.3333)S(0.3333)PK;
FNDSEGDDTEETEDYR	FNDS[79.9663]EGDDTEETEDYR	K	Q	394	409	16	2	4S(79.9663)	sp|Q9NYF8|BCLF1_HUMAN	Q9NYF8	BCLF1_HUMAN	BCLAF1	Bcl-2-associated transcription factor 1			3	0	MS/MS	STY:79.9663@FNDS(0.9284)EGDDT(0.0187)EET(0.0264)EDY(0.0264)R;
FNEEHIPDSPFVVPVASPSGDAR	FNEEHIPDSPFVVPVASPS[79.9663]GDAR	K	R	2311	2333	23	3	19S(79.9663)	sp|P21333|FLNA_HUMAN	P21333	FLNA_HUMAN	FLNA	Filamin-A			1	3424877	MS/MS	STY:79.9663@FNEEHIPDS(0.2968)PFVVPVAS(0.0290)PS(0.6742)GDAR;
FNEEHIPDSPFVVPVASPSGDAR	FNEEHIPDSPFVVPVAS[79.9663]PSGDAR	K	R	2311	2333	23	3	17S(79.9663)	sp|P21333|FLNA_HUMAN	P21333	FLNA_HUMAN	FLNA	Filamin-A			2	3424877	MS/MS	STY:79.9663@FNEEHIPDS(0.0265)PFVVPVAS(0.9469)PS(0.0266)GDAR;
FNEEHIPDSPFVVPVASPSGDAR	FNEEHIPDS[79.9663]PFVVPVASPSGDAR	K	R	2311	2333	23	3	9S(79.9663)	sp|P21333|FLNA_HUMAN	P21333	FLNA_HUMAN	FLNA	Filamin-A			1	3424877	MS/MS	STY:79.9663@FNEEHIPDS(0.9260)PFVVPVAS(0.0370)PS(0.0370)GDAR;
FSGEEGEIEDDESGTENREEK	FSGEEGEIEDDES[79.9663]GTENREEK	K	D	927	947	21	3	13S(79.9663)	sp|Q9Y2W1|TR150_HUMAN	Q9Y2W1	TR150_HUMAN	THRAP3	Thyroid hormone receptor-associated protein 3			1	2.0677e+06	MS/MS	STY:79.9663@FS(0.0203)GEEGEIEDDES(0.4899)GT(0.4899)ENREEK;
FSEMMNNMGGDEDVDLPEVDGADDDSQDSDDEK	FS[79.9663]EMMNNMGGDEDVDLPEVDGADDDSQDSDDEK	R	M	123	155	33	3	2S(79.9663)	sp|Q15185|TEBP_HUMAN	Q15185	TEBP_HUMAN	PTGES3	Prostaglandin E synthase 3			1	0	MS/MS	STY:79.9663@FS(0.6372)EMMNNMGGDEDVDLPEVDGADDDS(0.1814)QDS(0.1814)DDEK;
FVSEGDGGR	FVS[79.9663]EGDGGR	R	L	455	463	9	2	3S(79.9663)	sp|Q53EL6|PDCD4_HUMAN	Q53EL6	PDCD4_HUMAN	PDCD4	Programmed cell death protein 4			2	6822105	MS/MS	STY:79.9663@FVS(1.0000)EGDGGR;
GAAPTPPGK	GAAPT[79.9663]PPGK	K	T	910	918	9	2	5T(79.9663)	sp|Q13428|TCOF_HUMAN	Q13428	TCOF_HUMAN	TCOF1	Treacle protein			1	663899	MS/MS	STY:79.9663@GAAPT(1.0000)PPGK;
GAGDGSDEEVDGK	GAGDGS[79.9663]DEEVDGK	K	A	1938	1950	13	2	6S(79.9663)	sp|P35579|MYH9_HUMAN	P35579	MYH9_HUMAN	MYH9	Myosin-9			6	5.0677376E7	MS/MS	STY:79.9663@GAGDGS(1.0000)DEEVDGK;
GAPSSPATGVLPSPQGK	GAPS[79.9663]SPATGVLPSPQGK	R	S	1705	1721	17	2	4S(79.9663)	sp|Q5SRE5|NU188_HUMAN	Q5SRE5	NU188_HUMAN	NUP188	Nucleoporin NUP188			1	0	MS/MS	STY:79.9663@GAPS(0.8822)S(0.0312)PAT(0.0312)GVLPS(0.0554)PQGK;
GDEASEEGQNGSSPK	GDEASEEGQNGS[79.9663]SPK	R	S	453	467	15	2	12S(79.9663)	sp|P35611|ADDA_HUMAN	P35611	ADDA_HUMAN	ADD1	Alpha-adducin			1	0	MS/MS	STY:79.9663@GDEAS(0.0169)EEGQNGS(0.4916)S(0.4916)PK;
GDPPRLSPDPVAGSAVSQELR	GDPPRLS[79.9663]PDPVAGSAVSQELR	R	E	48	68	21	3	7S(79.9663)	sp|Q9BUR4|TCAB1_HUMAN	Q9BUR4	TCAB1_HUMAN	WRAP53	Telomerase Cajal body protein 1			3	4.73194e+06	MS/MS	STY:79.9663@GDPPRLS(0.9436)PDPVAGS(0.0284)AVS(0.0279)QELR;
GDVTAEEAAGASPAK	GDVT[79.9663]AEEAAGASPAK	R	A	11	25	15	2	4T(79.9663)	sp|P49006|MRP_HUMAN	P49006	MRP_HUMAN	MARCKSL1	MARCKS-related protein			2	2.14731e+06	MS/MS	STY:79.9663@GDVT(0.5000)AEEAAGAS(0.5000)PAK;
[truncated: 690 more rows]

## Sheet: TiO2_3_MSFragger
Peptide Sequence	Modified Sequence	Prev AA	Next AA	Start	End	Peptide Length	Charges	Assigned Modifications	Protein	Protein ID	Entry Name	Gene	Protein Description	Mapped Genes	Mapped Proteins	TiO2_3 Spectral Count	TiO2_3 Intensity	TiO2_3 Match Type	TiO2_3 Localization
[truncated: 1,252 more rows]

[truncated: 5 more sheets: TiO2_1_PD, TiO2_2_PD, TiO2_3_PD, phosphoprotein, phosphosite]
